# Supplementary material
Source: PubMed Central journal article supplement (PMC4817634)
Supplement: ismej201577x2.pdf [file ismej201577x2.pdf]

Supplementary information of genes annotated for the Bg1 genome

| gene_oid   | Locus Tag | Source         | Cluster Information                                                   | Gene Information                                 | E-value  |
|------------|-----------|----------------|-----------------------------------------------------------------------|--------------------------------------------------|----------|
| 2572231645 | t3m_00001 | pfam01458      | UPF0051                                                               |                                                  | 1.70E-53 |
| 2572231645 | t3m_00001 | Locus_type     |                                                                       | CDS                                              |          |
| 2572231645 | t3m_00001 | Product_name   |                                                                       | Uncharacterized protein family (UPF0051)         |          |
| 2572231645 | t3m_00001 | Scaffold       |                                                                       | t3m_contig_70_5_len_122850_read_count_10924403.1 |          |
| 2572231645 | t3m_00001 | Coordinates    |                                                                       | 1..651(+)                                        |          |
| 2572231645 | t3m_00001 | DNA_length     |                                                                       | 651bp                                            |          |
| 2572231645 | t3m_00001 | Protein_length |                                                                       | 216aa                                            |          |
| 2572231645 | t3m_00001 | GC             |                                                                       |                                                  | 0.66     |
| 2572231646 | t3m_00002 | COG_category   | [S] Function unknown                                                  |                                                  |          |
| 2572231646 | t3m_00002 | COG2259        | Predicted membrane protein                                            |                                                  | 4.00E-03 |
| 2572231646 | t3m_00002 | pfam07681      | DoxX                                                                  |                                                  | 5.40E-07 |
| 2572231646 | t3m_00002 | Locus_type     |                                                                       | CDS                                              |          |
| 2572231646 | t3m_00002 | Product_name   |                                                                       | Predicted membrane protein                       |          |
| 2572231646 | t3m_00002 | Scaffold       |                                                                       | t3m_contig_70_5_len_122850_read_count_10924403.1 |          |
| 2572231646 | t3m_00002 | Coordinates    |                                                                       | 874..1422(+)                                     |          |
| 2572231646 | t3m_00002 | DNA_length     |                                                                       | 549bp                                            |          |
| 2572231646 | t3m_00002 | Protein_length |                                                                       | 182aa                                            |          |
| 2572231646 | t3m_00002 | GC             |                                                                       |                                                  | 0.64     |
| 2572231646 | t3m_00002 | Transmembrane  |                                                                       | Yes                                              |          |
| 2572231647 | t3m_00003 | Locus_type     |                                                                       | CDS                                              |          |
| 2572231647 | t3m_00003 | Product_name   |                                                                       | hypothetical protein                             |          |
| 2572231647 | t3m_00003 | Scaffold       |                                                                       | t3m_contig_70_5_len_122850_read_count_10924403.1 |          |
| 2572231647 | t3m_00003 | Coordinates    |                                                                       | 1486..1803(-)                                    |          |
| 2572231647 | t3m_00003 | DNA_length     |                                                                       | 318bp                                            |          |
| 2572231647 | t3m_00003 | Protein_length |                                                                       | 105aa                                            |          |
| 2572231647 | t3m_00003 | GC             |                                                                       |                                                  | 0.67     |
| 2572231648 | t3m_00004 | COG_category   | [O] Posttranslational modification, protein turnover, chaperones      |                                                  |          |
| 2572231648 | t3m_00004 | COG0719        | ABC-type transport system involved in Fe-S cluster assembly, permease |                                                  | 4.00E-48 |

|            |           |                |                                                                    |                                                                       |          |
|------------|-----------|----------------|--------------------------------------------------------------------|-----------------------------------------------------------------------|----------|
| 2572231648 | t3m_00004 | pfam01458      | UPF0051                                                            |                                                                       | 4.60E-46 |
| 2572231648 | t3m_00004 | Locus_type     |                                                                    | CDS                                                                   |          |
| 2572231648 | t3m_00004 | Product_name   |                                                                    | ABC-type transport system involved in Fe-S cluster assembly, permease |          |
| 2572231648 | t3m_00004 | Scaffold       |                                                                    | t3m_contig_70_5_len_122850_read_count_10924403.1                      |          |
| 2572231648 | t3m_00004 | Coordinates    |                                                                    | 1851..3245(-)                                                         |          |
| 2572231648 | t3m_00004 | DNA_length     |                                                                    | 1395bp                                                                |          |
| 2572231648 | t3m_00004 | Protein_length |                                                                    | 464aa                                                                 |          |
| 2572231648 | t3m_00004 | GC             |                                                                    |                                                                       | 0.68     |
| 2572231649 | t3m_00005 | COG_category   | [C] Energy production and conversion                               |                                                                       |          |
| 2572231649 | t3m_00005 | COG0822        | NifU homolog involved in Fe-S cluster formation                    |                                                                       | 4.00E-26 |
| 2572231649 | t3m_00005 | pfam01592      | NifU_N                                                             |                                                                       | 5.30E-31 |
| 2572231649 | t3m_00005 | TIGR01994      | SUF system FeS assembly protein, NifU family                       |                                                                       | 1.30E-31 |
| 2572231649 | t3m_00005 | KO:K04488      | nitrogen fixation protein NifU and related proteins                |                                                                       | 2.30E-27 |
| 2572231649 | t3m_00005 | Locus_type     |                                                                    | CDS                                                                   |          |
| 2572231649 | t3m_00005 | Product_name   |                                                                    | SUF system FeS assembly protein, NifU family                          |          |
| 2572231649 | t3m_00005 | Scaffold       |                                                                    | t3m_contig_70_5_len_122850_read_count_10924403.1                      |          |
| 2572231649 | t3m_00005 | Coordinates    |                                                                    | 3429..3818(+)                                                         |          |
| 2572231649 | t3m_00005 | DNA_length     |                                                                    | 390bp                                                                 |          |
| 2572231649 | t3m_00005 | Protein_length |                                                                    | 129aa                                                                 |          |
| 2572231649 | t3m_00005 | GC             |                                                                    |                                                                       | 0.64     |
| 2572231650 | t3m_00006 | pfam13237      | Fer4_10                                                            |                                                                       | 6.40E-08 |
| 2572231650 | t3m_00006 | Locus_type     |                                                                    | CDS                                                                   |          |
| 2572231650 | t3m_00006 | Product_name   |                                                                    | 4Fe-4S dicluster domain                                               |          |
| 2572231650 | t3m_00006 | Scaffold       |                                                                    | t3m_contig_70_5_len_122850_read_count_10924403.1                      |          |
| 2572231650 | t3m_00006 | Coordinates    |                                                                    | 3904..4104(+)                                                         |          |
| 2572231650 | t3m_00006 | DNA_length     |                                                                    | 201bp                                                                 |          |
| 2572231650 | t3m_00006 | Protein_length |                                                                    | 66aa                                                                  |          |
| 2572231650 | t3m_00006 | GC             |                                                                    |                                                                       | 0.69     |
| 2572231651 | t3m_00007 | COG_category   | [C] Energy production and conversion                               |                                                                       |          |
| 2572231651 | t3m_00007 | COG0667        | Predicted oxidoreductases (related to aryl-alcohol dehydrogenases) |                                                                       | 1.00E-26 |
| 2572231651 | t3m_00007 | pfam00248      | Aldo_ket_red                                                       |                                                                       | 1.50E-27 |

|            |           |                |                                                                    |          |
|------------|-----------|----------------|--------------------------------------------------------------------|----------|
| 2572231651 | t3m_00007 | Locus_type     | CDS                                                                |          |
| 2572231651 | t3m_00007 | Product_name   | Predicted oxidoreductases (related to aryl-alcohol dehydrogenases) |          |
| 2572231651 | t3m_00007 | Scaffold       | t3m_contig_70_5_len_122850_read_count_10924403.1                   |          |
| 2572231651 | t3m_00007 | Coordinates    | 4328..5458(+)                                                      |          |
| 2572231651 | t3m_00007 | DNA_length     | 1131bp                                                             |          |
| 2572231651 | t3m_00007 | Protein_length | 376aa                                                              |          |
| 2572231651 | t3m_00007 | GC             |                                                                    | 0.69     |
|            |           |                |                                                                    |          |
| 2572231652 | t3m_00008 | COG_category   | [L] Replication, recombination and repair                          |          |
| 2572231652 | t3m_00008 | COG0419        | ATPase involved in DNA repair                                      | 1.00E-40 |
| 2572231652 | t3m_00008 | pfam02463      | SMC_N                                                              | 6.30E-17 |
| 2572231652 | t3m_00008 | Locus_type     | CDS                                                                |          |
| 2572231652 | t3m_00008 | Product_name   | ATPase involved in DNA repair                                      |          |
| 2572231652 | t3m_00008 | Scaffold       | t3m_contig_70_5_len_122850_read_count_10924403.1                   |          |
| 2572231652 | t3m_00008 | Coordinates    | 5493..8060(-)                                                      |          |
| 2572231652 | t3m_00008 | DNA_length     | 2568bp                                                             |          |
| 2572231652 | t3m_00008 | Protein_length | 855aa                                                              |          |
| 2572231652 | t3m_00008 | GC             |                                                                    | 0.71     |
|            |           |                |                                                                    |          |
| 2572231653 | t3m_00009 | COG_category   | [L] Replication, recombination and repair                          |          |
| 2572231653 | t3m_00009 | COG0420        | DNA repair exonuclease                                             | 6.00E-25 |
| 2572231653 | t3m_00009 | pfam12850      | Metallophos_2                                                      | 4.10E-11 |
| 2572231653 | t3m_00009 | Locus_type     | CDS                                                                |          |
| 2572231653 | t3m_00009 | Product_name   | DNA repair exonuclease                                             |          |
| 2572231653 | t3m_00009 | Scaffold       | t3m_contig_70_5_len_122850_read_count_10924403.1                   |          |
| 2572231653 | t3m_00009 | Coordinates    | 8070..9353(-)                                                      |          |
| 2572231653 | t3m_00009 | DNA_length     | 1284bp                                                             |          |
| 2572231653 | t3m_00009 | Protein_length | 427aa                                                              |          |
| 2572231653 | t3m_00009 | GC             |                                                                    | 0.71     |
|            |           |                |                                                                    |          |
| 2572231654 | t3m_00010 | Locus_type     | CDS                                                                |          |
| 2572231654 | t3m_00010 | Product_name   | hypothetical protein                                               |          |
| 2572231654 | t3m_00010 | Scaffold       | t3m_contig_70_5_len_122850_read_count_10924403.1                   |          |
| 2572231654 | t3m_00010 | Coordinates    | 9357..9665(-)                                                      |          |

|            |           |                |                                                                  |          |
|------------|-----------|----------------|------------------------------------------------------------------|----------|
| 2572231654 | t3m_00010 | DNA_length     | 309bp                                                            |          |
| 2572231654 | t3m_00010 | Protein_length | 102aa                                                            |          |
| 2572231654 | t3m_00010 | GC             |                                                                  | 0.73     |
| 2572231654 | t3m_00010 | Transmembrane  | Yes                                                              |          |
| 2572231655 | t3m_00011 | Locus_type     | CDS                                                              |          |
| 2572231655 | t3m_00011 | Product_name   | hypothetical protein                                             |          |
| 2572231655 | t3m_00011 | Scaffold       | t3m_contig_70_5_len_122850_read_count_10924403.1                 |          |
| 2572231655 | t3m_00011 | Coordinates    | 9874..10233(+)                                                   |          |
| 2572231655 | t3m_00011 | DNA_length     | 360bp                                                            |          |
| 2572231655 | t3m_00011 | Protein_length | 119aa                                                            |          |
| 2572231655 | t3m_00011 | GC             |                                                                  | 0.68     |
| 2572231656 | t3m_00012 | COG_category   | [C] Energy production and conversion                             |          |
| 2572231656 | t3m_00012 | COG3808        | Inorganic pyrophosphatase                                        | 0.00E+00 |
| 2572231656 | t3m_00012 | pfam03030      | H_PPase                                                          | 0.00E+00 |
| 2572231656 | t3m_00012 | EC:3.6.1.1     | Inorganic diphosphatase.                                         |          |
| 2572231656 | t3m_00012 | TIGR01104      | vacuolar-type H(+)-translocating pyrophosphatase                 | 0.00E+00 |
| 2572231656 | t3m_00012 | KO:K15987      | K(+)-stimulated pyrophosphate-energized sodium pump [EC:3.6.1.1] | 0.00E+00 |
| 2572231656 | t3m_00012 | Locus_type     | CDS                                                              |          |
| 2572231656 | t3m_00012 | Product_name   | vacuolar-type H(+)-translocating pyrophosphatase                 |          |
| 2572231656 | t3m_00012 | Scaffold       | t3m_contig_70_5_len_122850_read_count_10924403.1                 |          |
| 2572231656 | t3m_00012 | Coordinates    | 10472..12598(-)                                                  |          |
| 2572231656 | t3m_00012 | DNA_length     | 2127bp                                                           |          |
| 2572231656 | t3m_00012 | Protein_length | 708aa                                                            |          |
| 2572231656 | t3m_00012 | GC             |                                                                  | 0.67     |
| 2572231656 | t3m_00012 | Transmembrane  | Yes                                                              |          |
| 2572231657 | t3m_00013 | KEGG_module    | M00359: Aminoacyl-tRNA biosynthesis, eukaryotes                  |          |
| 2572231657 | t3m_00013 | KEGG_module    | M00360: Aminoacyl-tRNA biosynthesis, prokaryotes                 |          |
| 2572231657 | t3m_00013 | Metacyc        | TRNA-CHARGING-PWY: tRNA charging                                 |          |
| 2572231657 | t3m_00013 | IMG_pathway    | 504: L-threonine ligation to tRNA(Thr)                           |          |
| 2572231657 | t3m_00013 | COG_category   | [J] Translation, ribosomal structure and biogenesis              |          |
| 2572231657 | t3m_00013 | COG0441        | Threonyl-tRNA synthetase                                         | 0.00E+00 |

|            |           |                |                                                   |           |
|------------|-----------|----------------|---------------------------------------------------|-----------|
| 2572231657 | t3m_00013 | pfam07973      | tRNA_SAD                                          | 3.60E-07  |
| 2572231657 | t3m_00013 | pfam03129      | HGTP_anticodon                                    | 2.90E-16  |
| 2572231657 | t3m_00013 | pfam00587      | tRNA-synt_2b                                      | 4.00E-39  |
| 2572231657 | t3m_00013 | EC:6.1.1.3     | Threonine--tRNA ligase.                           |           |
| 2572231657 | t3m_00013 | TIGR00418      | threonyl-tRNA synthetase                          | 0.00E+00  |
| 2572231657 | t3m_00013 | KO:K01868      | threonyl-tRNA synthetase [EC:6.1.1.3]             | 0.00E+00  |
| 2572231657 | t3m_00013 | ITERM:00389    | threonyl-tRNA synthetase (EC 6.1.1.3)             |           |
| 2572231657 | t3m_00013 | Locus_type     | CDS                                               |           |
| 2572231657 | t3m_00013 | Product_name   | threonyl-tRNA synthetase (EC 6.1.1.3)             |           |
| 2572231657 | t3m_00013 | Scaffold       | t3m_contig_70_5_len_122850_read_count_10924403.1  |           |
| 2572231657 | t3m_00013 | Coordinates    | 12935..14851(-)                                   |           |
| 2572231657 | t3m_00013 | DNA_length     | 1917bp                                            |           |
| 2572231657 | t3m_00013 | Protein_length | 638aa                                             |           |
| 2572231657 | t3m_00013 | GC             |                                                   | 0.67      |
|            |           |                |                                                   |           |
| 2572231658 | t3m_00014 | Locus_type     | CDS                                               |           |
| 2572231658 | t3m_00014 | Product_name   | hypothetical protein                              |           |
| 2572231658 | t3m_00014 | Scaffold       | t3m_contig_70_5_len_122850_read_count_10924403.1  |           |
| 2572231658 | t3m_00014 | Coordinates    | 15109..15342(+)                                   |           |
| 2572231658 | t3m_00014 | DNA_length     | 234bp                                             |           |
| 2572231658 | t3m_00014 | Protein_length | 77aa                                              |           |
| 2572231658 | t3m_00014 | GC             |                                                   | 0.67      |
|            |           |                |                                                   |           |
| 2572231659 | t3m_00015 | Locus_type     | CDS                                               |           |
| 2572231659 | t3m_00015 | Product_name   | hypothetical protein                              |           |
| 2572231659 | t3m_00015 | Scaffold       | t3m_contig_70_5_len_122850_read_count_10924403.1  |           |
| 2572231659 | t3m_00015 | Coordinates    | 15420..15701(-)                                   |           |
| 2572231659 | t3m_00015 | DNA_length     | 282bp                                             |           |
| 2572231659 | t3m_00015 | Protein_length | 93aa                                              |           |
| 2572231659 | t3m_00015 | GC             |                                                   | 0.59      |
|            |           |                |                                                   |           |
| 2572231660 | t3m_00016 | COG_category   | [R] General function prediction only              |           |
| 2572231660 | t3m_00016 | COG3975        | Predicted protease with the C-terminal PDZ domain | 1.00E-106 |
| 2572231660 | t3m_00016 | pfam13180      | PDZ_2                                             | 2.40E-07  |

|            |           |                |                                        |                                                                  |          |
|------------|-----------|----------------|----------------------------------------|------------------------------------------------------------------|----------|
| 2572231660 | t3m_00016 | pfam05299      | Peptidase_M61                          |                                                                  | 8.40E-36 |
| 2572231660 | t3m_00016 | Locus_type     |                                        | CDS                                                              |          |
| 2572231660 | t3m_00016 | Product_name   |                                        | Predicted protease with the C-terminal PDZ domain                |          |
| 2572231660 | t3m_00016 | Scaffold       |                                        | t3m_contig_70_5_len_122850_read_count_10924403.1                 |          |
| 2572231660 | t3m_00016 | Coordinates    |                                        | 15879..17654(-)                                                  |          |
| 2572231660 | t3m_00016 | DNA_length     |                                        | 1776bp                                                           |          |
| 2572231660 | t3m_00016 | Protein_length |                                        | 591aa                                                            |          |
| 2572231660 | t3m_00016 | GC             |                                        |                                                                  | 0.64     |
|            |           |                |                                        |                                                                  |          |
| 2572231661 | t3m_00017 | Locus_type     |                                        | CDS                                                              |          |
| 2572231661 | t3m_00017 | Product_name   |                                        | hypothetical protein                                             |          |
| 2572231661 | t3m_00017 | Scaffold       |                                        | t3m_contig_70_5_len_122850_read_count_10924403.1                 |          |
| 2572231661 | t3m_00017 | Coordinates    |                                        | 17665..17796(-)                                                  |          |
| 2572231661 | t3m_00017 | DNA_length     |                                        | 132bp                                                            |          |
| 2572231661 | t3m_00017 | Protein_length |                                        | 43aa                                                             |          |
| 2572231661 | t3m_00017 | GC             |                                        |                                                                  | 0.72     |
|            |           |                |                                        |                                                                  |          |
| 2572231662 | t3m_00018 | pfam00496      | SBP_bac_5                              |                                                                  | 5.50E-09 |
| 2572231662 | t3m_00018 | Locus_type     |                                        | CDS                                                              |          |
| 2572231662 | t3m_00018 | Product_name   |                                        | Bacterial extracellular solute-binding proteins, family 5 Middle |          |
| 2572231662 | t3m_00018 | Scaffold       |                                        | t3m_contig_70_5_len_122850_read_count_10924403.1                 |          |
| 2572231662 | t3m_00018 | Coordinates    |                                        | 17814..20957(-)                                                  |          |
| 2572231662 | t3m_00018 | DNA_length     |                                        | 3144bp                                                           |          |
| 2572231662 | t3m_00018 | Protein_length |                                        | 1047aa                                                           |          |
| 2572231662 | t3m_00018 | GC             |                                        |                                                                  | 0.64     |
| 2572231662 | t3m_00018 | Transmembrane  |                                        | Yes                                                              |          |
|            |           |                |                                        |                                                                  |          |
| 2572231663 | t3m_00019 | COG_category   | [K] Transcription                      |                                                                  |          |
| 2572231663 | t3m_00019 | COG1522        | Transcriptional regulators             |                                                                  | 9.00E-24 |
| 2572231663 | t3m_00019 | pfam13412      | HTH_24                                 |                                                                  | 6.80E-12 |
| 2572231663 | t3m_00019 | pfam01037      | AsnC_trans_reg                         |                                                                  | 1.60E-14 |
| 2572231663 | t3m_00019 | ITERM:01884    | transcriptional regulator, AsnC family |                                                                  |          |
| 2572231663 | t3m_00019 | Locus_type     |                                        | CDS                                                              |          |
| 2572231663 | t3m_00019 | Product_name   |                                        | transcriptional regulator, AsnC family                           |          |

|            |           |                |                                                                         |                                                  |          |
|------------|-----------|----------------|-------------------------------------------------------------------------|--------------------------------------------------|----------|
| 2572231663 | t3m_00019 | Scaffold       |                                                                         | t3m_contig_70_5_len_122850_read_count_10924403.1 |          |
| 2572231663 | t3m_00019 | Coordinates    |                                                                         | 21187..21645(-)                                  |          |
| 2572231663 | t3m_00019 | DNA_length     |                                                                         | 459bp                                            |          |
| 2572231663 | t3m_00019 | Protein_length |                                                                         | 152aa                                            |          |
| 2572231663 | t3m_00019 | GC             |                                                                         |                                                  | 0.59     |
| 2572231664 | t3m_00020 | pfam00977      | His_biosynth                                                            |                                                  | 1.90E-10 |
| 2572231664 | t3m_00020 | Locus_type     |                                                                         | CDS                                              |          |
| 2572231664 | t3m_00020 | Product_name   |                                                                         | Histidine biosynthesis protein                   |          |
| 2572231664 | t3m_00020 | Scaffold       |                                                                         | t3m_contig_70_5_len_122850_read_count_10924403.1 |          |
| 2572231664 | t3m_00020 | Coordinates    |                                                                         | 22632..23240(-)                                  |          |
| 2572231664 | t3m_00020 | DNA_length     |                                                                         | 609bp                                            |          |
| 2572231664 | t3m_00020 | Protein_length |                                                                         | 202aa                                            |          |
| 2572231664 | t3m_00020 | GC             |                                                                         |                                                  | 0.66     |
| 2572231665 | t3m_00021 | Locus_type     |                                                                         | CDS                                              |          |
| 2572231665 | t3m_00021 | Product_name   |                                                                         | hypothetical protein                             |          |
| 2572231665 | t3m_00021 | Scaffold       |                                                                         | t3m_contig_70_5_len_122850_read_count_10924403.1 |          |
| 2572231665 | t3m_00021 | Coordinates    |                                                                         | 23961..24650(-)                                  |          |
| 2572231665 | t3m_00021 | DNA_length     |                                                                         | 690bp                                            |          |
| 2572231665 | t3m_00021 | Protein_length |                                                                         | 229aa                                            |          |
| 2572231665 | t3m_00021 | GC             |                                                                         |                                                  | 0.61     |
| 2572231666 | t3m_00022 | KEGG_module    | M00023: Tryptophan biosynthesis, chorismate => tryptophan               |                                                  |          |
| 2572231666 | t3m_00022 | COG_category   | [R] General function prediction only                                    |                                                  |          |
| 2572231666 | t3m_00022 | COG1350        | Predicted alternative tryptophan synthase beta-subunit (paralog of TrpI |                                                  | 0.00E+00 |
| 2572231666 | t3m_00022 | pfam00291      | PALP                                                                    |                                                  | 9.00E-44 |
| 2572231666 | t3m_00022 | EC:4.2.1.20    | Tryptophan synthase.                                                    |                                                  |          |
| 2572231666 | t3m_00022 | TIGR01415      | pyridoxal-phosphate dependent TrpB-like enzyme                          |                                                  | 0.00E+00 |
| 2572231666 | t3m_00022 | KO:K06001      | tryptophan synthase beta chain [EC:4.2.1.20]                            |                                                  | 0.00E+00 |
| 2572231666 | t3m_00022 | Locus_type     |                                                                         | CDS                                              |          |
| 2572231666 | t3m_00022 | Product_name   |                                                                         | pyridoxal-phosphate dependent TrpB-like enzyme   |          |
| 2572231666 | t3m_00022 | Scaffold       |                                                                         | t3m_contig_70_5_len_122850_read_count_10924403.1 |          |
| 2572231666 | t3m_00022 | Coordinates    |                                                                         | 24746..26056(+)                                  |          |

|            |           |                |                                                                                        |          |
|------------|-----------|----------------|----------------------------------------------------------------------------------------|----------|
| 2572231666 | t3m_00022 | DNA_length     | 1311bp                                                                                 |          |
| 2572231666 | t3m_00022 | Protein_length | 436aa                                                                                  |          |
| 2572231666 | t3m_00022 | GC             |                                                                                        | 0.64     |
| 2572231667 | t3m_00023 | pfam07690      | MFS_1                                                                                  | 2.90E-10 |
| 2572231667 | t3m_00023 | Locus_type     | CDS                                                                                    |          |
| 2572231667 | t3m_00023 | Product_name   | Major Facilitator Superfamily                                                          |          |
| 2572231667 | t3m_00023 | Scaffold       | t3m_contig_70_5_len_122850_read_count_10924403.1                                       |          |
| 2572231667 | t3m_00023 | Coordinates    | 26216..27442(+)                                                                        |          |
| 2572231667 | t3m_00023 | DNA_length     | 1227bp                                                                                 |          |
| 2572231667 | t3m_00023 | Protein_length | 408aa                                                                                  |          |
| 2572231667 | t3m_00023 | GC             |                                                                                        | 0.63     |
| 2572231667 | t3m_00023 | Transmembrane  | Yes                                                                                    |          |
| 2572231668 | t3m_00024 | KEGG_module    | M00545: Trans-cinnamate degradation, trans-cinnamate => 2-oxopent-4-enoate + fumarate  |          |
| 2572231668 | t3m_00024 | KEGG_module    | M00547: Benzene/toluene degradation, benzene => catechol / toluene => 3-methylcatechol |          |
| 2572231668 | t3m_00024 | KEGG_module    | M00539: Cumate degradation, p-cumate => 2-oxopent-4-enoate + 2-methylpropanoate        |          |
| 2572231668 | t3m_00024 | KEGG_module    | M00543: Biphenyl degradation, biphenyl => 2-oxopent-4-enoate + benzoate                |          |
| 2572231668 | t3m_00024 | COG_category   | [R] General function prediction only                                                   |          |
| 2572231668 | t3m_00024 | COG_category   | [P] Inorganic ion transport and metabolism                                             |          |
| 2572231668 | t3m_00024 | COG2146        | Ferredoxin subunits of nitrite reductase and ring-hydroxylating dioxygenase            | 1.00E-11 |
| 2572231668 | t3m_00024 | pfam00355      | Rieske                                                                                 | 9.40E-15 |
| 2572231668 | t3m_00024 | KO:K05710      | dioxygenase ferredoxin subunit                                                         | 1.60E-07 |
| 2572231668 | t3m_00024 | Locus_type     | CDS                                                                                    |          |
| 2572231668 | t3m_00024 | Product_name   | Ferredoxin subunits of nitrite reductase and ring-hydroxylating dioxygenase            |          |
| 2572231668 | t3m_00024 | Scaffold       | t3m_contig_70_5_len_122850_read_count_10924403.1                                       |          |
| 2572231668 | t3m_00024 | Coordinates    | 27542..27943(-)                                                                        |          |
| 2572231668 | t3m_00024 | DNA_length     | 402bp                                                                                  |          |
| 2572231668 | t3m_00024 | Protein_length | 133aa                                                                                  |          |
| 2572231668 | t3m_00024 | GC             |                                                                                        | 0.62     |
| 2572231669 | t3m_00025 | COG_category   | [G] Carbohydrate transport and metabolism                                              |          |
| 2572231669 | t3m_00025 | COG_category   | [M] Cell wall/membrane/envelope biogenesis                                             |          |
| 2572231669 | t3m_00025 | COG0702        | Predicted nucleoside-diphosphate-sugar epimerases                                      | 9.00E-17 |



|            |           |                |      |                                                   |          |
|------------|-----------|----------------|------|---------------------------------------------------|----------|
| 2572231669 | t3m_00025 | pfam05368      | NmrA |                                                   | 2.50E-33 |
| 2572231669 | t3m_00025 | Locus_type     |      | CDS                                               |          |
| 2572231669 | t3m_00025 | Product_name   |      | Predicted nucleoside-diphosphate-sugar epimerases |          |
| 2572231669 | t3m_00025 | Scaffold       |      | t3m_contig_70_5_len_122850_read_count_10924403.1  |          |
| 2572231669 | t3m_00025 | Coordinates    |      | 28508..29296(+)                                   |          |
| 2572231669 | t3m_00025 | DNA_length     |      | 789bp                                             |          |
| 2572231669 | t3m_00025 | Protein_length |      | 262aa                                             |          |
| 2572231669 | t3m_00025 | GC             |      |                                                   | 0.61     |
|            |           |                |      |                                                   |          |
| 2572231670 | t3m_00026 | Locus_type     |      | CDS                                               |          |
| 2572231670 | t3m_00026 | Product_name   |      | hypothetical protein                              |          |
| 2572231670 | t3m_00026 | Scaffold       |      | t3m_contig_70_5_len_122850_read_count_10924403.1  |          |
| 2572231670 | t3m_00026 | Coordinates    |      | 29497..29811(-)                                   |          |
| 2572231670 | t3m_00026 | DNA_length     |      | 315bp                                             |          |
| 2572231670 | t3m_00026 | Protein_length |      | 104aa                                             |          |
| 2572231670 | t3m_00026 | GC             |      |                                                   | 0.6      |
|            |           |                |      |                                                   |          |
| 2572231671 | t3m_00027 | Locus_type     |      | CDS                                               |          |
| 2572231671 | t3m_00027 | Product_name   |      | hypothetical protein                              |          |
| 2572231671 | t3m_00027 | Scaffold       |      | t3m_contig_70_5_len_122850_read_count_10924403.1  |          |
| 2572231671 | t3m_00027 | Coordinates    |      | 29964..30110(-)                                   |          |
| 2572231671 | t3m_00027 | DNA_length     |      | 147bp                                             |          |
| 2572231671 | t3m_00027 | Protein_length |      | 48aa                                              |          |
| 2572231671 | t3m_00027 | GC             |      |                                                   | 0.5      |
|            |           |                |      |                                                   |          |
| 2572231672 | t3m_00028 | Locus_type     |      | CDS                                               |          |
| 2572231672 | t3m_00028 | Product_name   |      | hypothetical protein                              |          |
| 2572231672 | t3m_00028 | Scaffold       |      | t3m_contig_70_5_len_122850_read_count_10924403.1  |          |
| 2572231672 | t3m_00028 | Coordinates    |      | 30309..30434(-)                                   |          |
| 2572231672 | t3m_00028 | DNA_length     |      | 126bp                                             |          |
| 2572231672 | t3m_00028 | Protein_length |      | 41aa                                              |          |
| 2572231672 | t3m_00028 | GC             |      |                                                   | 0.58     |
|            |           |                |      |                                                   |          |
| 2572231673 | t3m_00029 | Locus_type     |      | CDS                                               |          |

|            |           |                |                                                  |          |
|------------|-----------|----------------|--------------------------------------------------|----------|
| 2572231673 | t3m_00029 | Product_name   | hypothetical protein                             |          |
| 2572231673 | t3m_00029 | Scaffold       | t3m_contig_70_5_len_122850_read_count_10924403.1 |          |
| 2572231673 | t3m_00029 | Coordinates    | 30743..30937(-)                                  |          |
| 2572231673 | t3m_00029 | DNA_length     | 195bp                                            |          |
| 2572231673 | t3m_00029 | Protein_length | 64aa                                             |          |
| 2572231673 | t3m_00029 | GC             |                                                  | 0.53     |
|            |           |                |                                                  |          |
| 2572231674 | t3m_00030 | Locus_type     | CDS                                              |          |
| 2572231674 | t3m_00030 | Product_name   | hypothetical protein                             |          |
| 2572231674 | t3m_00030 | Scaffold       | t3m_contig_70_5_len_122850_read_count_10924403.1 |          |
| 2572231674 | t3m_00030 | Coordinates    | 30952..31317(+)                                  |          |
| 2572231674 | t3m_00030 | DNA_length     | 366bp                                            |          |
| 2572231674 | t3m_00030 | Protein_length | 121aa                                            |          |
| 2572231674 | t3m_00030 | GC             |                                                  | 0.58     |
| 2572231674 | t3m_00030 | Transmembrane  | Yes                                              |          |
|            |           |                |                                                  |          |
| 2572231675 | t3m_00031 | Locus_type     | CDS                                              |          |
| 2572231675 | t3m_00031 | Product_name   | hypothetical protein                             |          |
| 2572231675 | t3m_00031 | Scaffold       | t3m_contig_70_5_len_122850_read_count_10924403.1 |          |
| 2572231675 | t3m_00031 | Coordinates    | 31545..31940(-)                                  |          |
| 2572231675 | t3m_00031 | DNA_length     | 396bp                                            |          |
| 2572231675 | t3m_00031 | Protein_length | 131aa                                            |          |
| 2572231675 | t3m_00031 | GC             |                                                  | 0.61     |
|            |           |                |                                                  |          |
| 2572231676 | t3m_00032 | pfam05317      | Thermopsin                                       | 2.10E-51 |
| 2572231676 | t3m_00032 | EC:3.4.23.42   | Thermopsin.                                      |          |
| 2572231676 | t3m_00032 | KO:K01385      | thermopsin [EC:3.4.23.42]                        | 0.00E+00 |
| 2572231676 | t3m_00032 | Locus_type     | CDS                                              |          |
| 2572231676 | t3m_00032 | Product_name   | Thermopsin                                       |          |
| 2572231676 | t3m_00032 | Scaffold       | t3m_contig_70_5_len_122850_read_count_10924403.1 |          |
| 2572231676 | t3m_00032 | Coordinates    | 32379..34988(+)                                  |          |
| 2572231676 | t3m_00032 | DNA_length     | 2610bp                                           |          |
| 2572231676 | t3m_00032 | Protein_length | 869aa                                            |          |
| 2572231676 | t3m_00032 | GC             |                                                  | 0.64     |

|            |           |                |                                                     |                                                                  |          |
|------------|-----------|----------------|-----------------------------------------------------|------------------------------------------------------------------|----------|
| 2572231676 | t3m_00032 | Signal_peptide |                                                     | Yes                                                              |          |
| 2572231676 | t3m_00032 | Transmembrane  |                                                     | Yes                                                              |          |
| 2572231677 | t3m_00033 | Locus_type     |                                                     | CDS                                                              |          |
| 2572231677 | t3m_00033 | Product_name   |                                                     | hypothetical protein                                             |          |
| 2572231677 | t3m_00033 | Scaffold       |                                                     | t3m_contig_70_5_len_122850_read_count_10924403.1                 |          |
| 2572231677 | t3m_00033 | Coordinates    |                                                     | 35167..35457(-)                                                  |          |
| 2572231677 | t3m_00033 | DNA_length     |                                                     | 291bp                                                            |          |
| 2572231677 | t3m_00033 | Protein_length |                                                     | 96aa                                                             |          |
| 2572231677 | t3m_00033 | GC             |                                                     |                                                                  | 0.64     |
| 2572231678 | t3m_00034 | pfam00496      | SBP_bac_5                                           |                                                                  | 2.10E-12 |
| 2572231678 | t3m_00034 | Locus_type     |                                                     | CDS                                                              |          |
| 2572231678 | t3m_00034 | Product_name   |                                                     | Bacterial extracellular solute-binding proteins, family 5 Middle |          |
| 2572231678 | t3m_00034 | Scaffold       |                                                     | t3m_contig_70_5_len_122850_read_count_10924403.1                 |          |
| 2572231678 | t3m_00034 | Coordinates    |                                                     | 35532..37883(+)                                                  |          |
| 2572231678 | t3m_00034 | DNA_length     |                                                     | 2352bp                                                           |          |
| 2572231678 | t3m_00034 | Protein_length |                                                     | 783aa                                                            |          |
| 2572231678 | t3m_00034 | GC             |                                                     |                                                                  | 0.63     |
| 2572231678 | t3m_00034 | Transmembrane  |                                                     | Yes                                                              |          |
| 2572231679 | t3m_00035 | Locus_type     |                                                     | CDS                                                              |          |
| 2572231679 | t3m_00035 | Product_name   |                                                     | hypothetical protein                                             |          |
| 2572231679 | t3m_00035 | Scaffold       |                                                     | t3m_contig_70_5_len_122850_read_count_10924403.1                 |          |
| 2572231679 | t3m_00035 | Coordinates    |                                                     | 38128..38286(+)                                                  |          |
| 2572231679 | t3m_00035 | DNA_length     |                                                     | 159bp                                                            |          |
| 2572231679 | t3m_00035 | Protein_length |                                                     | 52aa                                                             |          |
| 2572231679 | t3m_00035 | GC             |                                                     |                                                                  | 0.56     |
| 2572231680 | t3m_00036 | COG_category   | [R] General function prediction only                |                                                                  |          |
| 2572231680 | t3m_00036 | COG1988        | Predicted membrane-bound metal-dependent hydrolases |                                                                  | 1.00E-07 |
| 2572231680 | t3m_00036 | pfam04307      | DUF457                                              |                                                                  | 1.50E-17 |
| 2572231680 | t3m_00036 | Locus_type     |                                                     | CDS                                                              |          |
| 2572231680 | t3m_00036 | Product_name   |                                                     | Predicted membrane-bound metal-dependent hydrolases              |          |

|            |           |                |                                                  |          |
|------------|-----------|----------------|--------------------------------------------------|----------|
| 2572231680 | t3m_00036 | Scaffold       | t3m_contig_70_5_len_122850_read_count_10924403.1 |          |
| 2572231680 | t3m_00036 | Coordinates    | 38500..39522(+)                                  |          |
| 2572231680 | t3m_00036 | DNA_length     | 1023bp                                           |          |
| 2572231680 | t3m_00036 | Protein_length | 340aa                                            |          |
| 2572231680 | t3m_00036 | GC             |                                                  | 0.58     |
| 2572231680 | t3m_00036 | Transmembrane  | Yes                                              |          |
| 2572231681 | t3m_00037 | COG_category   | [H] Coenzyme transport and metabolism            |          |
| 2572231681 | t3m_00037 | COG0262        | Dihydrofolate reductase                          | 1.00E-09 |
| 2572231681 | t3m_00037 | pfam01872      | RibD_C                                           | 9.70E-17 |
| 2572231681 | t3m_00037 | Locus_type     | CDS                                              |          |
| 2572231681 | t3m_00037 | Product_name   | Dihydrofolate reductase                          |          |
| 2572231681 | t3m_00037 | Scaffold       | t3m_contig_70_5_len_122850_read_count_10924403.1 |          |
| 2572231681 | t3m_00037 | Coordinates    | 39704..40297(+)                                  |          |
| 2572231681 | t3m_00037 | DNA_length     | 594bp                                            |          |
| 2572231681 | t3m_00037 | Protein_length | 197aa                                            |          |
| 2572231681 | t3m_00037 | GC             |                                                  | 0.6      |
| 2572231682 | t3m_00038 | Locus_type     | CDS                                              |          |
| 2572231682 | t3m_00038 | Product_name   | hypothetical protein                             |          |
| 2572231682 | t3m_00038 | Scaffold       | t3m_contig_70_5_len_122850_read_count_10924403.1 |          |
| 2572231682 | t3m_00038 | Coordinates    | 41102..41476(-)                                  |          |
| 2572231682 | t3m_00038 | DNA_length     | 375bp                                            |          |
| 2572231682 | t3m_00038 | Protein_length | 124aa                                            |          |
| 2572231682 | t3m_00038 | GC             |                                                  | 0.58     |
| 2572231683 | t3m_00039 | Locus_type     | CDS                                              |          |
| 2572231683 | t3m_00039 | Product_name   | hypothetical protein                             |          |
| 2572231683 | t3m_00039 | Scaffold       | t3m_contig_70_5_len_122850_read_count_10924403.1 |          |
| 2572231683 | t3m_00039 | Coordinates    | 42085..42501(+)                                  |          |
| 2572231683 | t3m_00039 | DNA_length     | 417bp                                            |          |
| 2572231683 | t3m_00039 | Protein_length | 138aa                                            |          |
| 2572231683 | t3m_00039 | GC             |                                                  | 0.63     |
| 2572231683 | t3m_00039 | Transmembrane  | Yes                                              |          |

|            |           |                |                                                                       |                                                                       |          |
|------------|-----------|----------------|-----------------------------------------------------------------------|-----------------------------------------------------------------------|----------|
| 2572231684 | t3m_00040 | pfam02661      | Fic                                                                   |                                                                       | 7.30E-26 |
| 2572231684 | t3m_00040 | Locus_type     |                                                                       | CDS                                                                   |          |
| 2572231684 | t3m_00040 | Product_name   |                                                                       | Fic/DOC family                                                        |          |
| 2572231684 | t3m_00040 | Scaffold       |                                                                       | t3m_contig_70_5_len_122850_read_count_10924403.1                      |          |
| 2572231684 | t3m_00040 | Coordinates    |                                                                       | 42717..43619(-)                                                       |          |
| 2572231684 | t3m_00040 | DNA_length     |                                                                       | 903bp                                                                 |          |
| 2572231684 | t3m_00040 | Protein_length |                                                                       | 300aa                                                                 |          |
| 2572231684 | t3m_00040 | GC             |                                                                       |                                                                       | 0.57     |
| 2572231685 | t3m_00041 | COG_category   | [D] Cell cycle control, cell division, chromosome partitioning        |                                                                       |          |
| 2572231685 | t3m_00041 | COG_category   | [J] Translation, ribosomal structure and biogenesis                   |                                                                       |          |
| 2572231685 | t3m_00041 | COG2026        | Cytotoxic translational repressor of toxin-antitoxin stability system |                                                                       | 9.00E-12 |
| 2572231685 | t3m_00041 | pfam05016      | Plasmid_stabil                                                        |                                                                       | 8.40E-11 |
| 2572231685 | t3m_00041 | KO:K06218      | RelE protein                                                          |                                                                       | 2.30E-21 |
| 2572231685 | t3m_00041 | Locus_type     |                                                                       | CDS                                                                   |          |
| 2572231685 | t3m_00041 | Product_name   |                                                                       | Cytotoxic translational repressor of toxin-antitoxin stability system |          |
| 2572231685 | t3m_00041 | Scaffold       |                                                                       | t3m_contig_70_5_len_122850_read_count_10924403.1                      |          |
| 2572231685 | t3m_00041 | Coordinates    |                                                                       | 43831..44082(-)                                                       |          |
| 2572231685 | t3m_00041 | DNA_length     |                                                                       | 252bp                                                                 |          |
| 2572231685 | t3m_00041 | Protein_length |                                                                       | 83aa                                                                  |          |
| 2572231685 | t3m_00041 | GC             |                                                                       |                                                                       | 0.57     |
| 2572231686 | t3m_00042 | Locus_type     |                                                                       | CDS                                                                   |          |
| 2572231686 | t3m_00042 | Product_name   |                                                                       | hypothetical protein                                                  |          |
| 2572231686 | t3m_00042 | Scaffold       |                                                                       | t3m_contig_70_5_len_122850_read_count_10924403.1                      |          |
| 2572231686 | t3m_00042 | Coordinates    |                                                                       | 44082..44303(-)                                                       |          |
| 2572231686 | t3m_00042 | DNA_length     |                                                                       | 222bp                                                                 |          |
| 2572231686 | t3m_00042 | Protein_length |                                                                       | 73aa                                                                  |          |
| 2572231686 | t3m_00042 | GC             |                                                                       |                                                                       | 0.57     |
| 2572231687 | t3m_00043 | pfam08922      | DUF1905                                                               |                                                                       | 3.30E-09 |
| 2572231687 | t3m_00043 | pfam13376      | OmdA                                                                  |                                                                       | 1.40E-20 |
| 2572231687 | t3m_00043 | Locus_type     |                                                                       | CDS                                                                   |          |

|            |           |                |                                      |                                                                     |          |
|------------|-----------|----------------|--------------------------------------|---------------------------------------------------------------------|----------|
| 2572231687 | t3m_00043 | Product_name   |                                      | Bacteriocin-protection, Ydel or OmpD-Associated/Domain of unknown f |          |
| 2572231687 | t3m_00043 | Scaffold       |                                      | t3m_contig_70_5_len_122850_read_count_10924403.1                    |          |
| 2572231687 | t3m_00043 | Coordinates    |                                      | 44592..44951(+)                                                     |          |
| 2572231687 | t3m_00043 | DNA_length     |                                      | 360bp                                                               |          |
| 2572231687 | t3m_00043 | Protein_length |                                      | 119aa                                                               |          |
| 2572231687 | t3m_00043 | GC             |                                      |                                                                     | 0.63     |
| 2572231688 | t3m_00044 | pfam00583      | Acetyltransf_1                       |                                                                     | 1.60E-09 |
| 2572231688 | t3m_00044 | Locus_type     |                                      | CDS                                                                 |          |
| 2572231688 | t3m_00044 | Product_name   |                                      | Acetyltransferase (GNAT) family                                     |          |
| 2572231688 | t3m_00044 | Scaffold       |                                      | t3m_contig_70_5_len_122850_read_count_10924403.1                    |          |
| 2572231688 | t3m_00044 | Coordinates    |                                      | 45142..45993(+)                                                     |          |
| 2572231688 | t3m_00044 | DNA_length     |                                      | 852bp                                                               |          |
| 2572231688 | t3m_00044 | Protein_length |                                      | 283aa                                                               |          |
| 2572231688 | t3m_00044 | GC             |                                      |                                                                     | 0.59     |
| 2572231689 | t3m_00045 | Locus_type     |                                      | CDS                                                                 |          |
| 2572231689 | t3m_00045 | Product_name   |                                      | hypothetical protein                                                |          |
| 2572231689 | t3m_00045 | Scaffold       |                                      | t3m_contig_70_5_len_122850_read_count_10924403.1                    |          |
| 2572231689 | t3m_00045 | Coordinates    |                                      | 46585..47091(-)                                                     |          |
| 2572231689 | t3m_00045 | DNA_length     |                                      | 507bp                                                               |          |
| 2572231689 | t3m_00045 | Protein_length |                                      | 168aa                                                               |          |
| 2572231689 | t3m_00045 | GC             |                                      |                                                                     | 0.6      |
| 2572231689 | t3m_00045 | Transmembrane  |                                      | Yes                                                                 |          |
| 2572231690 | t3m_00046 | Locus_type     |                                      | CDS                                                                 |          |
| 2572231690 | t3m_00046 | Product_name   |                                      | hypothetical protein                                                |          |
| 2572231690 | t3m_00046 | Scaffold       |                                      | t3m_contig_70_5_len_122850_read_count_10924403.1                    |          |
| 2572231690 | t3m_00046 | Coordinates    |                                      | 47988..48428(-)                                                     |          |
| 2572231690 | t3m_00046 | DNA_length     |                                      | 441bp                                                               |          |
| 2572231690 | t3m_00046 | Protein_length |                                      | 146aa                                                               |          |
| 2572231690 | t3m_00046 | GC             |                                      |                                                                     | 0.56     |
| 2572231691 | t3m_00047 | COG_category   | [R] General function prediction only |                                                                     |          |

|            |           |                |                                                                         |          |
|------------|-----------|----------------|-------------------------------------------------------------------------|----------|
| 2572231691 | t3m_00047 | COG3324        | Predicted enzyme related to lactoylglutathione lyase                    | 2.00E-10 |
| 2572231691 | t3m_00047 | pfam12681      | Glyoxalase_2                                                            | 1.30E-08 |
| 2572231691 | t3m_00047 | Locus_type     | CDS                                                                     |          |
| 2572231691 | t3m_00047 | Product_name   | Predicted enzyme related to lactoylglutathione lyase                    |          |
| 2572231691 | t3m_00047 | Scaffold       | t3m_contig_70_5_len_122850_read_count_10924403.1                        |          |
| 2572231691 | t3m_00047 | Coordinates    | 48606..48992(-)                                                         |          |
| 2572231691 | t3m_00047 | DNA_length     | 387bp                                                                   |          |
| 2572231691 | t3m_00047 | Protein_length | 128aa                                                                   |          |
| 2572231691 | t3m_00047 | GC             |                                                                         | 0.61     |
| 2572231692 | t3m_00048 | KEGG_module    | M00258: Putative ABC transport system                                   |          |
| 2572231692 | t3m_00048 | COG_category   | [M] Cell wall/membrane/envelope biogenesis                              |          |
| 2572231692 | t3m_00048 | COG4591        | ABC-type transport system, involved in lipoprotein release, permease c  | 2.00E-17 |
| 2572231692 | t3m_00048 | pfam12704      | MacB_PCD                                                                | 5.60E-11 |
| 2572231692 | t3m_00048 | pfam02687      | FtsX                                                                    | 4.60E-15 |
| 2572231692 | t3m_00048 | pfam02687      | FtsX                                                                    | 9.70E-18 |
| 2572231692 | t3m_00048 | KO:K02004      | putative ABC transport system permease protein                          | 0.00E+00 |
| 2572231692 | t3m_00048 | Locus_type     | CDS                                                                     |          |
| 2572231692 | t3m_00048 | Product_name   | ABC-type transport system, involved in lipoprotein release, permease co |          |
| 2572231692 | t3m_00048 | Scaffold       | t3m_contig_70_5_len_122850_read_count_10924403.1                        |          |
| 2572231692 | t3m_00048 | Coordinates    | 49128..52100(-)                                                         |          |
| 2572231692 | t3m_00048 | DNA_length     | 2973bp                                                                  |          |
| 2572231692 | t3m_00048 | Protein_length | 990aa                                                                   |          |
| 2572231692 | t3m_00048 | GC             |                                                                         | 0.65     |
| 2572231692 | t3m_00048 | Transmembrane  | Yes                                                                     |          |
| 2572231693 | t3m_00049 | KEGG_module    | M00258: Putative ABC transport system                                   |          |
| 2572231693 | t3m_00049 | COG_category   | [V] Defense mechanisms                                                  |          |
| 2572231693 | t3m_00049 | COG1136        | ABC-type antimicrobial peptide transport system, ATPase component       | 1.00E-77 |
| 2572231693 | t3m_00049 | pfam00005      | ABC_tran                                                                | 7.70E-33 |
| 2572231693 | t3m_00049 | KO:K02003      | putative ABC transport system ATP-binding protein                       | 0.00E+00 |
| 2572231693 | t3m_00049 | Locus_type     | CDS                                                                     |          |
| 2572231693 | t3m_00049 | Product_name   | ABC-type antimicrobial peptide transport system, ATPase component       |          |
| 2572231693 | t3m_00049 | Scaffold       | t3m_contig_70_5_len_122850_read_count_10924403.1                        |          |

|            |           |                |                 |                                                  |          |
|------------|-----------|----------------|-----------------|--------------------------------------------------|----------|
| 2572231693 | t3m_00049 | Coordinates    |                 | 52106..52783(-)                                  |          |
| 2572231693 | t3m_00049 | DNA_length     |                 | 678bp                                            |          |
| 2572231693 | t3m_00049 | Protein_length |                 | 225aa                                            |          |
| 2572231693 | t3m_00049 | GC             |                 |                                                  | 0.63     |
|            |           |                |                 |                                                  |          |
| 2572231694 | t3m_00050 | Locus_type     |                 | CDS                                              |          |
| 2572231694 | t3m_00050 | Product_name   |                 | hypothetical protein                             |          |
| 2572231694 | t3m_00050 | Scaffold       |                 | t3m_contig_70_5_len_122850_read_count_10924403.1 |          |
| 2572231694 | t3m_00050 | Coordinates    |                 | 52960..53106(+)                                  |          |
| 2572231694 | t3m_00050 | DNA_length     |                 | 147bp                                            |          |
| 2572231694 | t3m_00050 | Protein_length |                 | 48aa                                             |          |
| 2572231694 | t3m_00050 | GC             |                 |                                                  | 0.63     |
|            |           |                |                 |                                                  |          |
| 2572231695 | t3m_00051 | Locus_type     |                 | CDS                                              |          |
| 2572231695 | t3m_00051 | Product_name   |                 | hypothetical protein                             |          |
| 2572231695 | t3m_00051 | Scaffold       |                 | t3m_contig_70_5_len_122850_read_count_10924403.1 |          |
| 2572231695 | t3m_00051 | Coordinates    |                 | 53198..53659(-)                                  |          |
| 2572231695 | t3m_00051 | DNA_length     |                 | 462bp                                            |          |
| 2572231695 | t3m_00051 | Protein_length |                 | 153aa                                            |          |
| 2572231695 | t3m_00051 | GC             |                 |                                                  | 0.59     |
| 2572231695 | t3m_00051 | Transmembrane  |                 | Yes                                              |          |
|            |           |                |                 |                                                  |          |
| 2572231696 | t3m_00052 | Locus_type     |                 | CDS                                              |          |
| 2572231696 | t3m_00052 | Product_name   |                 | hypothetical protein                             |          |
| 2572231696 | t3m_00052 | Scaffold       |                 | t3m_contig_70_5_len_122850_read_count_10924403.1 |          |
| 2572231696 | t3m_00052 | Coordinates    |                 | 54065..55198(+)                                  |          |
| 2572231696 | t3m_00052 | DNA_length     |                 | 1134bp                                           |          |
| 2572231696 | t3m_00052 | Protein_length |                 | 377aa                                            |          |
| 2572231696 | t3m_00052 | GC             |                 |                                                  | 0.64     |
|            |           |                |                 |                                                  |          |
| 2572231697 | t3m_00053 | pfam13489      | Methyltransf_23 |                                                  | 1.70E-20 |
| 2572231697 | t3m_00053 | Locus_type     |                 | CDS                                              |          |
| 2572231697 | t3m_00053 | Product_name   |                 | Methyltransferase domain                         |          |
| 2572231697 | t3m_00053 | Scaffold       |                 | t3m_contig_70_5_len_122850_read_count_10924403.1 |          |



|            |           |                |                                                                       |           |
|------------|-----------|----------------|-----------------------------------------------------------------------|-----------|
| 2572231697 | t3m_00053 | Coordinates    | 55201..56016(-)                                                       |           |
| 2572231697 | t3m_00053 | DNA_length     | 816bp                                                                 |           |
| 2572231697 | t3m_00053 | Protein_length | 271aa                                                                 |           |
| 2572231697 | t3m_00053 | GC             |                                                                       | 0.66      |
| 2572231698 | t3m_00054 | COG_category   | [T] Signal transduction mechanisms                                    |           |
| 2572231698 | t3m_00054 | COG0589        | Universal stress protein UspA and related nucleotide-binding proteins | 4.00E-15  |
| 2572231698 | t3m_00054 | pfam00582      | Usp                                                                   | 1.20E-24  |
| 2572231698 | t3m_00054 | Locus_type     | CDS                                                                   |           |
| 2572231698 | t3m_00054 | Product_name   | Universal stress protein UspA and related nucleotide-binding proteins |           |
| 2572231698 | t3m_00054 | Scaffold       | t3m_contig_70_5_len_122850_read_count_10924403.1                      |           |
| 2572231698 | t3m_00054 | Coordinates    | 56175..56618(+)                                                       |           |
| 2572231698 | t3m_00054 | DNA_length     | 444bp                                                                 |           |
| 2572231698 | t3m_00054 | Protein_length | 147aa                                                                 |           |
| 2572231698 | t3m_00054 | GC             |                                                                       | 0.66      |
| 2572231699 | t3m_00055 | COG_category   | [R] General function prediction only                                  |           |
| 2572231699 | t3m_00055 | COG5006        | Predicted permease, DMT superfamily                                   | 4.00E-04  |
| 2572231699 | t3m_00055 | pfam00892      | EamA                                                                  | 1.80E-18  |
| 2572231699 | t3m_00055 | pfam00892      | EamA                                                                  | 3.90E-18  |
| 2572231699 | t3m_00055 | Locus_type     | CDS                                                                   |           |
| 2572231699 | t3m_00055 | Product_name   | Predicted permease, DMT superfamily                                   |           |
| 2572231699 | t3m_00055 | Scaffold       | t3m_contig_70_5_len_122850_read_count_10924403.1                      |           |
| 2572231699 | t3m_00055 | Coordinates    | 56674..57597(-)                                                       |           |
| 2572231699 | t3m_00055 | DNA_length     | 924bp                                                                 |           |
| 2572231699 | t3m_00055 | Protein_length | 307aa                                                                 |           |
| 2572231699 | t3m_00055 | GC             |                                                                       | 0.66      |
| 2572231699 | t3m_00055 | Transmembrane  | Yes                                                                   |           |
| 2572231700 | t3m_00056 | KEGG_module    | M00051: Uridine monophosphate biosynthesis, glutamine (+ PRPP) => UMP |           |
| 2572231700 | t3m_00056 | Metacyc        | PWY-5686: UMP biosynthesis                                            |           |
| 2572231700 | t3m_00056 | IMG_pathway    | 321: Uridine 5'-monophosphate biosynthesis                            |           |
| 2572231700 | t3m_00056 | COG_category   | [F] Nucleotide transport and metabolism                               |           |
| 2572231700 | t3m_00056 | COG0540        | Aspartate carbamoyltransferase, catalytic chain                       | 1.00E-104 |

|            |           |                |                                                                       |           |
|------------|-----------|----------------|-----------------------------------------------------------------------|-----------|
| 2572231700 | t3m_00056 | pfam00185      | OTCace                                                                | 7.00E-39  |
| 2572231700 | t3m_00056 | pfam02729      | OTCace_N                                                              | 6.90E-46  |
| 2572231700 | t3m_00056 | EC:2.1.3.2     | Aspartate carbamoyltransferase.                                       |           |
| 2572231700 | t3m_00056 | TIGR00670      | aspartate carbamoyltransferase                                        | 8.40E-119 |
| 2572231700 | t3m_00056 | KO:K00609      | aspartate carbamoyltransferase catalytic subunit [EC:2.1.3.2]         | 0.00E+00  |
| 2572231700 | t3m_00056 | ITERM:01382    | aspartate carbamoyltransferase (EC 2.1.3.2)                           |           |
| 2572231700 | t3m_00056 | Locus_type     | CDS                                                                   |           |
| 2572231700 | t3m_00056 | Product_name   | aspartate carbamoyltransferase (EC 2.1.3.2)                           |           |
| 2572231700 | t3m_00056 | Scaffold       | t3m_contig_70_5_len_122850_read_count_10924403.1                      |           |
| 2572231700 | t3m_00056 | Coordinates    | 57708..58646(+)                                                       |           |
| 2572231700 | t3m_00056 | DNA_length     | 939bp                                                                 |           |
| 2572231700 | t3m_00056 | Protein_length | 312aa                                                                 |           |
| 2572231700 | t3m_00056 | GC             |                                                                       | 0.67      |
| 2572231701 | t3m_00057 | KEGG_module    | M00051: Uridine monophosphate biosynthesis, glutamine (+ PRPP) => UMP |           |
| 2572231701 | t3m_00057 | COG_category   | [F] Nucleotide transport and metabolism                               |           |
| 2572231701 | t3m_00057 | COG1781        | Aspartate carbamoyltransferase, regulatory subunit                    | 5.00E-45  |
| 2572231701 | t3m_00057 | pfam01948      | Pyrl                                                                  | 5.50E-31  |
| 2572231701 | t3m_00057 | pfam02748      | Pyrl_C                                                                | 1.70E-19  |
| 2572231701 | t3m_00057 | TIGR00240      | aspartate carbamoyltransferase, regulatory subunit                    | 3.80E-58  |
| 2572231701 | t3m_00057 | KO:K00610      | aspartate carbamoyltransferase regulatory subunit                     | 9.00E-40  |
| 2572231701 | t3m_00057 | Locus_type     | CDS                                                                   |           |
| 2572231701 | t3m_00057 | Product_name   | aspartate carbamoyltransferase, regulatory subunit                    |           |
| 2572231701 | t3m_00057 | Scaffold       | t3m_contig_70_5_len_122850_read_count_10924403.1                      |           |
| 2572231701 | t3m_00057 | Coordinates    | 58650..59111(+)                                                       |           |
| 2572231701 | t3m_00057 | DNA_length     | 462bp                                                                 |           |
| 2572231701 | t3m_00057 | Protein_length | 153aa                                                                 |           |
| 2572231701 | t3m_00057 | GC             |                                                                       | 0.62      |
| 2572231702 | t3m_00058 | COG_category   | [S] Function unknown                                                  |           |
| 2572231702 | t3m_00058 | COG2119        | Predicted membrane protein                                            | 2.00E-11  |
| 2572231702 | t3m_00058 | pfam01169      | UPF0016                                                               | 1.30E-10  |
| 2572231702 | t3m_00058 | pfam01169      | UPF0016                                                               | 1.60E-08  |
| 2572231702 | t3m_00058 | Locus_type     | CDS                                                                   |           |

|            |           |                |                                                                  |          |
|------------|-----------|----------------|------------------------------------------------------------------|----------|
| 2572231702 | t3m_00058 | Product_name   | Predicted membrane protein                                       |          |
| 2572231702 | t3m_00058 | Scaffold       | t3m_contig_70_5_len_122850_read_count_10924403.1                 |          |
| 2572231702 | t3m_00058 | Coordinates    | 59128..59751(+)                                                  |          |
| 2572231702 | t3m_00058 | DNA_length     | 624bp                                                            |          |
| 2572231702 | t3m_00058 | Protein_length | 207aa                                                            |          |
| 2572231702 | t3m_00058 | GC             |                                                                  | 0.67     |
| 2572231702 | t3m_00058 | Transmembrane  | Yes                                                              |          |
|            |           |                |                                                                  |          |
| 2572231703 | t3m_00059 | Locus_type     | CDS                                                              |          |
| 2572231703 | t3m_00059 | Product_name   | hypothetical protein                                             |          |
| 2572231703 | t3m_00059 | Scaffold       | t3m_contig_70_5_len_122850_read_count_10924403.1                 |          |
| 2572231703 | t3m_00059 | Coordinates    | 59704..62016(-)                                                  |          |
| 2572231703 | t3m_00059 | DNA_length     | 2313bp                                                           |          |
| 2572231703 | t3m_00059 | Protein_length | 770aa                                                            |          |
| 2572231703 | t3m_00059 | GC             |                                                                  | 0.69     |
|            |           |                |                                                                  |          |
| 2572231704 | t3m_00060 | Metacyc        | PWY-5905: hypusine biosynthesis                                  |          |
| 2572231704 | t3m_00060 | COG_category   | [O] Posttranslational modification, protein turnover, chaperones |          |
| 2572231704 | t3m_00060 | COG1899        | Deoxyhypusine synthase                                           | 1.00E-74 |
| 2572231704 | t3m_00060 | pfam01916      | DS                                                               | 2.10E-58 |
| 2572231704 | t3m_00060 | EC:2.5.1.46    | Deoxyhypusine synthase.                                          |          |
| 2572231704 | t3m_00060 | TIGR00321      | deoxyhypusine synthase                                           | 1.20E-75 |
| 2572231704 | t3m_00060 | KO:K00809      | deoxyhypusine synthase [EC:2.5.1.46]                             | 0.00E+00 |
| 2572231704 | t3m_00060 | Locus_type     | CDS                                                              |          |
| 2572231704 | t3m_00060 | Product_name   | Deoxyhypusine synthase                                           |          |
| 2572231704 | t3m_00060 | Scaffold       | t3m_contig_70_5_len_122850_read_count_10924403.1                 |          |
| 2572231704 | t3m_00060 | Coordinates    | 62108..63199(+)                                                  |          |
| 2572231704 | t3m_00060 | DNA_length     | 1092bp                                                           |          |
| 2572231704 | t3m_00060 | Protein_length | 363aa                                                            |          |
| 2572231704 | t3m_00060 | GC             |                                                                  | 0.66     |
|            |           |                |                                                                  |          |
| 2572231705 | t3m_00061 | pfam13191      | AAA_16                                                           | 1.90E-06 |
| 2572231705 | t3m_00061 | Locus_type     | CDS                                                              |          |
| 2572231705 | t3m_00061 | Product_name   | AAA ATPase domain                                                |          |

|            |           |                |                                                                 |          |
|------------|-----------|----------------|-----------------------------------------------------------------|----------|
| 2572231705 | t3m_00061 | Scaffold       | t3m_contig_70_5_len_122850_read_count_10924403.1                |          |
| 2572231705 | t3m_00061 | Coordinates    | 63758..66187(-)                                                 |          |
| 2572231705 | t3m_00061 | DNA_length     | 2430bp                                                          |          |
| 2572231705 | t3m_00061 | Protein_length | 809aa                                                           |          |
| 2572231705 | t3m_00061 | GC             |                                                                 | 0.63     |
|            |           |                |                                                                 |          |
| 2572231706 | t3m_00062 | Locus_type     | CDS                                                             |          |
| 2572231706 | t3m_00062 | Product_name   | hypothetical protein                                            |          |
| 2572231706 | t3m_00062 | Scaffold       | t3m_contig_70_5_len_122850_read_count_10924403.1                |          |
| 2572231706 | t3m_00062 | Coordinates    | 66284..66652(+)                                                 |          |
| 2572231706 | t3m_00062 | DNA_length     | 369bp                                                           |          |
| 2572231706 | t3m_00062 | Protein_length | 122aa                                                           |          |
| 2572231706 | t3m_00062 | GC             |                                                                 | 0.67     |
|            |           |                |                                                                 |          |
| 2572231707 | t3m_00063 | Locus_type     | CDS                                                             |          |
| 2572231707 | t3m_00063 | Product_name   | hypothetical protein                                            |          |
| 2572231707 | t3m_00063 | Scaffold       | t3m_contig_70_5_len_122850_read_count_10924403.1                |          |
| 2572231707 | t3m_00063 | Coordinates    | 66652..66858(+)                                                 |          |
| 2572231707 | t3m_00063 | DNA_length     | 207bp                                                           |          |
| 2572231707 | t3m_00063 | Protein_length | 68aa                                                            |          |
| 2572231707 | t3m_00063 | GC             |                                                                 | 0.68     |
|            |           |                |                                                                 |          |
| 2572231708 | t3m_00064 | Locus_type     | CDS                                                             |          |
| 2572231708 | t3m_00064 | Product_name   | hypothetical protein                                            |          |
| 2572231708 | t3m_00064 | Scaffold       | t3m_contig_70_5_len_122850_read_count_10924403.1                |          |
| 2572231708 | t3m_00064 | Coordinates    | 67014..67280(+)                                                 |          |
| 2572231708 | t3m_00064 | DNA_length     | 267bp                                                           |          |
| 2572231708 | t3m_00064 | Protein_length | 88aa                                                            |          |
| 2572231708 | t3m_00064 | GC             |                                                                 | 0.68     |
|            |           |                |                                                                 |          |
| 2572231709 | t3m_00065 | COG_category   | [R] General function prediction only                            |          |
| 2572231709 | t3m_00065 | COG0312        | Predicted Zn-dependent proteases and their inactivated homologs | 9.00E-47 |
| 2572231709 | t3m_00065 | pfam01523      | PmbA_TldD                                                       | 3.50E-30 |
| 2572231709 | t3m_00065 | KO:K03592      | PmbA protein                                                    | 2.20E-32 |

|            |           |                |                                                                                           |          |
|------------|-----------|----------------|-------------------------------------------------------------------------------------------|----------|
| 2572231709 | t3m_00065 | Locus_type     | CDS                                                                                       |          |
| 2572231709 | t3m_00065 | Product_name   | Predicted Zn-dependent proteases and their inactivated homologs                           |          |
| 2572231709 | t3m_00065 | Scaffold       | t3m_contig_70_5_len_122850_read_count_10924403.1                                          |          |
| 2572231709 | t3m_00065 | Coordinates    | 67293..68678(-)                                                                           |          |
| 2572231709 | t3m_00065 | DNA_length     | 1386bp                                                                                    |          |
| 2572231709 | t3m_00065 | Protein_length | 461aa                                                                                     |          |
| 2572231709 | t3m_00065 | GC             |                                                                                           | 0.67     |
|            |           |                |                                                                                           |          |
| 2572231710 | t3m_00066 | COG_category   | [R] General function prediction only                                                      |          |
| 2572231710 | t3m_00066 | COG0312        | Predicted Zn-dependent proteases and their inactivated homologs                           | 1.00E-68 |
| 2572231710 | t3m_00066 | pfam01523      | PmbA_TldD                                                                                 | 1.80E-45 |
| 2572231710 | t3m_00066 | KO:K03568      | TldD protein                                                                              | 0.00E+00 |
| 2572231710 | t3m_00066 | Locus_type     | CDS                                                                                       |          |
| 2572231710 | t3m_00066 | Product_name   | Predicted Zn-dependent proteases and their inactivated homologs                           |          |
| 2572231710 | t3m_00066 | Scaffold       | t3m_contig_70_5_len_122850_read_count_10924403.1                                          |          |
| 2572231710 | t3m_00066 | Coordinates    | 68702..70135(-)                                                                           |          |
| 2572231710 | t3m_00066 | DNA_length     | 1434bp                                                                                    |          |
| 2572231710 | t3m_00066 | Protein_length | 477aa                                                                                     |          |
| 2572231710 | t3m_00066 | GC             |                                                                                           | 0.68     |
|            |           |                |                                                                                           |          |
| 2572231711 | t3m_00067 | pfam12681      | Glyoxalase_2                                                                              | 4.10E-08 |
| 2572231711 | t3m_00067 | Locus_type     | CDS                                                                                       |          |
| 2572231711 | t3m_00067 | Product_name   | Glyoxalase-like domain                                                                    |          |
| 2572231711 | t3m_00067 | Scaffold       | t3m_contig_70_5_len_122850_read_count_10924403.1                                          |          |
| 2572231711 | t3m_00067 | Coordinates    | 70227..70664(+)                                                                           |          |
| 2572231711 | t3m_00067 | DNA_length     | 438bp                                                                                     |          |
| 2572231711 | t3m_00067 | Protein_length | 145aa                                                                                     |          |
| 2572231711 | t3m_00067 | GC             |                                                                                           | 0.68     |
|            |           |                |                                                                                           |          |
| 2572231712 | t3m_00068 | KEGG_module    | M00019: Valine/isoleucine biosynthesis, pyruvate => valine / 2-oxobutanoate => isoleucine |          |
| 2572231712 | t3m_00068 | KEGG_module    | M00570: Isoleucine biosynthesis, threonine => 2-oxobutanoate => isoleucine                |          |
| 2572231712 | t3m_00068 | KEGG_module    | M00036: Leucine degradation, leucine => acetoacetate + acetyl-CoA                         |          |
| 2572231712 | t3m_00068 | KEGG_module    | M00119: Pantothenate biosynthesis, valine/L-aspartate => pantothenate                     |          |
| 2572231712 | t3m_00068 | Metacyc        | VALSYN-PWY: valine biosynthesis                                                           |          |

|            |           |                |                                                                   |           |
|------------|-----------|----------------|-------------------------------------------------------------------|-----------|
| 2572231712 | t3m_00068 | Metacyc        | PWY-5076: leucine degradation III                                 |           |
| 2572231712 | t3m_00068 | Metacyc        | VALDEG-PWY: valine degradation I                                  |           |
| 2572231712 | t3m_00068 | Metacyc        | PWY-5101: isoleucine biosynthesis II                              |           |
| 2572231712 | t3m_00068 | Metacyc        | PWY-5108: isoleucine biosynthesis V                               |           |
| 2572231712 | t3m_00068 | Metacyc        | PWY-5104: isoleucine biosynthesis IV                              |           |
| 2572231712 | t3m_00068 | Metacyc        | PWY-5078: isoleucine degradation II                               |           |
| 2572231712 | t3m_00068 | Metacyc        | PWY-5103: isoleucine biosynthesis III                             |           |
| 2572231712 | t3m_00068 | Metacyc        | ILEUDEG-PWY: isoleucine degradation I                             |           |
| 2572231712 | t3m_00068 | Metacyc        | LEUSYN-PWY: leucine biosynthesis                                  |           |
| 2572231712 | t3m_00068 | Metacyc        | PWY-5057: valine degradation II                                   |           |
| 2572231712 | t3m_00068 | Metacyc        | LEU-DEG2-PWY: leucine degradation I                               |           |
| 2572231712 | t3m_00068 | Metacyc        | ILEUSYN-PWY: isoleucine biosynthesis I (from threonine)           |           |
| 2572231712 | t3m_00068 | Metacyc        | ALANINE-VALINESYN-PWY: alanine biosynthesis I                     |           |
| 2572231712 | t3m_00068 | COG_category   | [E] Amino acid transport and metabolism                           |           |
| 2572231712 | t3m_00068 | COG_category   | [H] Coenzyme transport and metabolism                             |           |
| 2572231712 | t3m_00068 | COG0115        | Branched-chain amino acid aminotransferase/4-amino-4-deoxychorism | 2.00E-64  |
| 2572231712 | t3m_00068 | pfam01063      | Aminotran_4                                                       | 3.90E-46  |
| 2572231712 | t3m_00068 | EC:2.6.1.42    | Branched-chain-amino-acid transaminase.                           |           |
| 2572231712 | t3m_00068 | TIGR01122      | branched-chain amino acid aminotransferase, group I               | 9.20E-114 |
| 2572231712 | t3m_00068 | KO:K00826      | branched-chain amino acid aminotransferase [EC:2.6.1.42]          | 0.00E+00  |
| 2572231712 | t3m_00068 | Locus_type     | CDS                                                               |           |
| 2572231712 | t3m_00068 | Product_name   | branched-chain amino acid aminotransferase, group I               |           |
| 2572231712 | t3m_00068 | Scaffold       | t3m_contig_70_5_len_122850_read_count_10924403.1                  |           |
| 2572231712 | t3m_00068 | Coordinates    | 70684..71637(-)                                                   |           |
| 2572231712 | t3m_00068 | DNA_length     | 954bp                                                             |           |
| 2572231712 | t3m_00068 | Protein_length | 317aa                                                             |           |
| 2572231712 | t3m_00068 | GC             |                                                                   | 0.63      |
|            |           |                |                                                                   |           |
| 2572231713 | t3m_00069 | Locus_type     | CDS                                                               |           |
| 2572231713 | t3m_00069 | Product_name   | hypothetical protein                                              |           |
| 2572231713 | t3m_00069 | Scaffold       | t3m_contig_70_5_len_122850_read_count_10924403.1                  |           |
| 2572231713 | t3m_00069 | Coordinates    | 72228..72941(+)                                                   |           |
| 2572231713 | t3m_00069 | DNA_length     | 714bp                                                             |           |
| 2572231713 | t3m_00069 | Protein_length | 237aa                                                             |           |

|            |           |                |                                                        |  |          |
|------------|-----------|----------------|--------------------------------------------------------|--|----------|
| 2572231713 | t3m_00069 | GC             |                                                        |  | 0.63     |
| 2572231713 | t3m_00069 | Transmembrane  | Yes                                                    |  |          |
| 2572231714 | t3m_00070 | pfam01850      | PIN                                                    |  | 3.60E-09 |
| 2572231714 | t3m_00070 | Locus_type     | CDS                                                    |  |          |
| 2572231714 | t3m_00070 | Product_name   | PIN domain                                             |  |          |
| 2572231714 | t3m_00070 | Scaffold       | t3m_contig_70_5_len_122850_read_count_10924403.1       |  |          |
| 2572231714 | t3m_00070 | Coordinates    | 73300..73707(-)                                        |  |          |
| 2572231714 | t3m_00070 | DNA_length     | 408bp                                                  |  |          |
| 2572231714 | t3m_00070 | Protein_length | 135aa                                                  |  |          |
| 2572231714 | t3m_00070 | GC             |                                                        |  | 0.66     |
| 2572231715 | t3m_00071 | COG_category   | [S] Function unknown                                   |  |          |
| 2572231715 | t3m_00071 | COG3379        | Uncharacterized conserved protein                      |  | 5.00E-97 |
| 2572231715 | t3m_00071 | pfam01663      | Phosphodiester                                         |  | 2.70E-41 |
| 2572231715 | t3m_00071 | Locus_type     | CDS                                                    |  |          |
| 2572231715 | t3m_00071 | Product_name   | Uncharacterized conserved protein                      |  |          |
| 2572231715 | t3m_00071 | Scaffold       | t3m_contig_70_5_len_122850_read_count_10924403.1       |  |          |
| 2572231715 | t3m_00071 | Coordinates    | 74150..75547(+)                                        |  |          |
| 2572231715 | t3m_00071 | DNA_length     | 1398bp                                                 |  |          |
| 2572231715 | t3m_00071 | Protein_length | 465aa                                                  |  |          |
| 2572231715 | t3m_00071 | GC             |                                                        |  | 0.66     |
| 2572231716 | t3m_00072 | KEGG_module    | M00358: Coenzyme M biosynthesis                        |  |          |
| 2572231716 | t3m_00072 | Metacyc        | P261-PWY: coenzyme M biosynthesis I                    |  |          |
| 2572231716 | t3m_00072 | IMG_pathway    | 348: Sulfoypyruvate formation from phosphoenolpyruvate |  |          |
| 2572231716 | t3m_00072 | COG_category   | [S] Function unknown                                   |  |          |
| 2572231716 | t3m_00072 | COG1809        | Uncharacterized conserved protein                      |  | 3.00E-45 |
| 2572231716 | t3m_00072 | pfam02679      | ComA                                                   |  | 7.90E-59 |
| 2572231716 | t3m_00072 | EC:4.4.1.19    | Phosphosulfolactate synthase.                          |  |          |
| 2572231716 | t3m_00072 | KO:K08097      | phosphosulfolactate synthase [EC:4.4.1.19]             |  | 1.60E-41 |
| 2572231716 | t3m_00072 | ITERM:01521    | phosphosulfolactate synthase (EC 4.4.1.19)             |  |          |
| 2572231716 | t3m_00072 | Locus_type     | CDS                                                    |  |          |
| 2572231716 | t3m_00072 | Product_name   | phosphosulfolactate synthase (EC 4.4.1.19)             |  |          |

|            |           |                |                                                                   |          |
|------------|-----------|----------------|-------------------------------------------------------------------|----------|
| 2572231716 | t3m_00072 | Scaffold       | t3m_contig_70_5_len_122850_read_count_10924403.1                  |          |
| 2572231716 | t3m_00072 | Coordinates    | 75636..76637(+)                                                   |          |
| 2572231716 | t3m_00072 | DNA_length     | 1002bp                                                            |          |
| 2572231716 | t3m_00072 | Protein_length | 333aa                                                             |          |
| 2572231716 | t3m_00072 | GC             |                                                                   | 0.66     |
| 2572231717 | t3m_00073 | COG_category   | [R] General function prediction only                              |          |
| 2572231717 | t3m_00073 | COG0300        | Short-chain dehydrogenases of various substrate specificities     | 6.00E-27 |
| 2572231717 | t3m_00073 | pfam00106      | adh_short                                                         | 2.40E-17 |
| 2572231717 | t3m_00073 | Locus_type     | CDS                                                               |          |
| 2572231717 | t3m_00073 | Product_name   | Short-chain dehydrogenases of various substrate specificities     |          |
| 2572231717 | t3m_00073 | Scaffold       | t3m_contig_70_5_len_122850_read_count_10924403.1                  |          |
| 2572231717 | t3m_00073 | Coordinates    | 76706..77587(+)                                                   |          |
| 2572231717 | t3m_00073 | DNA_length     | 882bp                                                             |          |
| 2572231717 | t3m_00073 | Protein_length | 293aa                                                             |          |
| 2572231717 | t3m_00073 | GC             |                                                                   | 0.7      |
| 2572231718 | t3m_00074 | KEGG_module    | M00549: Nucleotide sugar biosynthesis, glucose => UDP-glucose     |          |
| 2572231718 | t3m_00074 | KEGG_module    | M00001: Glycolysis (Embden-Meyerhof pathway), glucose => pyruvate |          |
| 2572231718 | t3m_00074 | Metacyc        | TREDEGLOW-PWY: trehalose degradation I (low osmolarity)           |          |
| 2572231718 | t3m_00074 | Metacyc        | PWY0-1182: trehalose degradation II (trehalase)                   |          |
| 2572231718 | t3m_00074 | Metacyc        | P124-PWY: Bifidobacterium shunt                                   |          |
| 2572231718 | t3m_00074 | Metacyc        | GLYCOCAT-PWY: glycogen degradation I                              |          |
| 2572231718 | t3m_00074 | Metacyc        | ANAGLYCOLYSIS-PWY: glycolysis III (glucokinase)                   |          |
| 2572231718 | t3m_00074 | Metacyc        | P122-PWY: heterolactic fermentation                               |          |
| 2572231718 | t3m_00074 | Metacyc        | GLUCOSE1PMETAB-PWY: glucose and glucose-1-phosphate degradation   |          |
| 2572231718 | t3m_00074 | Metacyc        | PWY-2723: trehalose degradation V                                 |          |
| 2572231718 | t3m_00074 | Metacyc        | PWY-5661: GDP-glucose biosynthesis                                |          |
| 2572231718 | t3m_00074 | Metacyc        | PWY-5514: UDP-N-acetyl-D-galactosamine biosynthesis II            |          |
| 2572231718 | t3m_00074 | Metacyc        | ANAEROFrucAT-PWY: homolactic fermentation                         |          |
| 2572231718 | t3m_00074 | Metacyc        | PWY-2722: trehalose degradation IV                                |          |
| 2572231718 | t3m_00074 | COG_category   | [K] Transcription                                                 |          |
| 2572231718 | t3m_00074 | COG_category   | [G] Carbohydrate transport and metabolism                         |          |
| 2572231718 | t3m_00074 | COG1940        | Transcriptional regulator/sugar kinase                            | 2.00E-42 |



|            |           |                |                                                  |           |
|------------|-----------|----------------|--------------------------------------------------|-----------|
| 2572231718 | t3m_00074 | pfam00480      | ROK                                              | 9.00E-38  |
| 2572231718 | t3m_00074 | EC:2.7.1.2     | Glucokinase.                                     |           |
| 2572231718 | t3m_00074 | KO:K00845      | glucokinase [EC:2.7.1.2]                         | 0.00E+00  |
| 2572231718 | t3m_00074 | Locus_type     | CDS                                              |           |
| 2572231718 | t3m_00074 | Product_name   | Transcriptional regulator/sugar kinase           |           |
| 2572231718 | t3m_00074 | Scaffold       | t3m_contig_70_5_len_122850_read_count_10924403.1 |           |
| 2572231718 | t3m_00074 | Coordinates    | 77584..78540(-)                                  |           |
| 2572231718 | t3m_00074 | DNA_length     | 957bp                                            |           |
| 2572231718 | t3m_00074 | Protein_length | 318aa                                            |           |
| 2572231718 | t3m_00074 | GC             |                                                  | 0.7       |
| 2572231719 | t3m_00075 | COG_category   | [G] Carbohydrate transport and metabolism        |           |
| 2572231719 | t3m_00075 | COG3387        | Glucosylase and related glycosyl hydrolases      | 9.00E-88  |
| 2572231719 | t3m_00075 | pfam00723      | Glyco_hydro_15                                   | 3.40E-09  |
| 2572231719 | t3m_00075 | TIGR01577      | oligosaccharide amylase                          | 3.60E-108 |
| 2572231719 | t3m_00075 | ITERM:03202    | glucoamylase (EC:3.2.1.3)                        |           |
| 2572231719 | t3m_00075 | Locus_type     | CDS                                              |           |
| 2572231719 | t3m_00075 | Product_name   | glucoamylase (EC:3.2.1.3)                        |           |
| 2572231719 | t3m_00075 | Scaffold       | t3m_contig_70_5_len_122850_read_count_10924403.1 |           |
| 2572231719 | t3m_00075 | Coordinates    | 78572..80437(-)                                  |           |
| 2572231719 | t3m_00075 | DNA_length     | 1866bp                                           |           |
| 2572231719 | t3m_00075 | Protein_length | 621aa                                            |           |
| 2572231719 | t3m_00075 | GC             |                                                  | 0.67      |
| 2572231720 | t3m_00076 | Metacyc        | PWY-842: starch degradation I                    |           |
| 2572231720 | t3m_00076 | pfam03065      | Glyco_hydro_57                                   | 5.00E-47  |
| 2572231720 | t3m_00076 | EC:3.2.1.1     | Alpha-amylase.                                   |           |
| 2572231720 | t3m_00076 | KO:K07405      | alpha-amylase [EC:3.2.1.1]                       | 0.00E+00  |
| 2572231720 | t3m_00076 | Locus_type     | CDS                                              |           |
| 2572231720 | t3m_00076 | Product_name   | Glycosyl hydrolase family 57                     |           |
| 2572231720 | t3m_00076 | Scaffold       | t3m_contig_70_5_len_122850_read_count_10924403.1 |           |
| 2572231720 | t3m_00076 | Coordinates    | 80562..81662(-)                                  |           |
| 2572231720 | t3m_00076 | DNA_length     | 1101bp                                           |           |
| 2572231720 | t3m_00076 | Protein_length | 366aa                                            |           |

|            |           |                |                                                                            |          |
|------------|-----------|----------------|----------------------------------------------------------------------------|----------|
| 2572231720 | t3m_00076 | GC             |                                                                            | 0.67     |
| 2572231721 | t3m_00077 | COG_category   | [M] Cell wall/membrane/envelope biogenesis                                 |          |
| 2572231721 | t3m_00077 | COG0438        | Glycosyltransferase                                                        | 4.00E-41 |
| 2572231721 | t3m_00077 | pfam13579      | Glyco_trans_4_4                                                            | 2.60E-23 |
| 2572231721 | t3m_00077 | pfam00534      | Glycos_transf_1                                                            | 2.20E-38 |
| 2572231721 | t3m_00077 | Locus_type     | CDS                                                                        |          |
| 2572231721 | t3m_00077 | Product_name   | Glycosyltransferase                                                        |          |
| 2572231721 | t3m_00077 | Scaffold       | t3m_contig_70_5_len_122850_read_count_10924403.1                           |          |
| 2572231721 | t3m_00077 | Coordinates    | 81752..82996(-)                                                            |          |
| 2572231721 | t3m_00077 | DNA_length     | 1245bp                                                                     |          |
| 2572231721 | t3m_00077 | Protein_length | 414aa                                                                      |          |
| 2572231721 | t3m_00077 | GC             |                                                                            | 0.68     |
| 2572231722 | t3m_00078 | KEGG_module    | M00003: Gluconeogenesis, oxaloacetate => fructose-6P                       |          |
| 2572231722 | t3m_00078 | KEGG_module    | M00001: Glycolysis (Embden-Meyerhof pathway), glucose => pyruvate          |          |
| 2572231722 | t3m_00078 | KEGG_module    | M00002: Glycolysis, core module involving three-carbon compounds           |          |
| 2572231722 | t3m_00078 | Metacyc        | CALVIN-PWY: Calvin-Benson-Bassham cycle                                    |          |
| 2572231722 | t3m_00078 | Metacyc        | P341-PWY: glycolysis V (Pyrococcus)                                        |          |
| 2572231722 | t3m_00078 | Metacyc        | PWY-5484: glycolysis II (from fructose-6P)                                 |          |
| 2572231722 | t3m_00078 | Metacyc        | PWY66-373: sucrose degradation V (mammalian)                               |          |
| 2572231722 | t3m_00078 | Metacyc        | ANAGLYCOLYSIS-PWY: glycolysis III (glucokinase)                            |          |
| 2572231722 | t3m_00078 | Metacyc        | PWY-1042: glycolysis IV (plant cytosol)                                    |          |
| 2572231722 | t3m_00078 | Metacyc        | GLYCOLYSIS: glycolysis I                                                   |          |
| 2572231722 | t3m_00078 | Metacyc        | P185-PWY: formaldehyde assimilation III (dihydroxyacetone cycle)           |          |
| 2572231722 | t3m_00078 | Metacyc        | PWY-7003: glycerol degradation to butanol                                  |          |
| 2572231722 | t3m_00078 | Metacyc        | GLUCONEO-PWY: gluconeogenesis I                                            |          |
| 2572231722 | t3m_00078 | Metacyc        | PWY-6142: gluconeogenesis II (<i>Methanobacterium thermoautotrophicum</i>) |          |
| 2572231722 | t3m_00078 | IMG_pathway    | 336: Standard Embden-Meyerhof pathway                                      |          |
| 2572231722 | t3m_00078 | IMG_pathway    | 337: Embden-Meyerhof pathway without bisphosphoglycerate                   |          |
| 2572231722 | t3m_00078 | IMG_pathway    | 527: Calvin cycle                                                          |          |
| 2572231722 | t3m_00078 | COG_category   | [G] Carbohydrate transport and metabolism                                  |          |
| 2572231722 | t3m_00078 | COG0149        | Triosephosphate isomerase                                                  | 2.00E-31 |
| 2572231722 | t3m_00078 | pfam00121      | TIM                                                                        | 3.30E-06 |

|            |           |                |                                                         |          |
|------------|-----------|----------------|---------------------------------------------------------|----------|
| 2572231722 | t3m_00078 | pfam00121      | TIM                                                     | 1.20E-13 |
| 2572231722 | t3m_00078 | EC:5.3.1.1     | Triose-phosphate isomerase.                             |          |
| 2572231722 | t3m_00078 | TIGR00419      | triosephosphate isomerase                               | 1.40E-45 |
| 2572231722 | t3m_00078 | KO:K01803      | triosephosphate isomerase (TIM) [EC:5.3.1.1]            | 0.00E+00 |
| 2572231722 | t3m_00078 | ITERM:01475    | triosephosphate isomerase (EC 5.3.1.1)                  |          |
| 2572231722 | t3m_00078 | Locus_type     | CDS                                                     |          |
| 2572231722 | t3m_00078 | Product_name   | triosephosphate isomerase (EC 5.3.1.1)                  |          |
| 2572231722 | t3m_00078 | Scaffold       | t3m_contig_70_5_len_122850_read_count_10924403.1        |          |
| 2572231722 | t3m_00078 | Coordinates    | 83292..83897(-)                                         |          |
| 2572231722 | t3m_00078 | DNA_length     | 606bp                                                   |          |
| 2572231722 | t3m_00078 | Protein_length | 201aa                                                   |          |
| 2572231722 | t3m_00078 | GC             |                                                         | 0.73     |
| 2572231723 | t3m_00079 | Locus_type     | CDS                                                     |          |
| 2572231723 | t3m_00079 | Product_name   | hypothetical protein                                    |          |
| 2572231723 | t3m_00079 | Scaffold       | t3m_contig_70_5_len_122850_read_count_10924403.1        |          |
| 2572231723 | t3m_00079 | Coordinates    | 83971..84180(-)                                         |          |
| 2572231723 | t3m_00079 | DNA_length     | 210bp                                                   |          |
| 2572231723 | t3m_00079 | Protein_length | 69aa                                                    |          |
| 2572231723 | t3m_00079 | GC             |                                                         | 0.62     |
| 2572231724 | t3m_00080 | KEGG_module    | M00357: Methanogenesis, acetate => methane              |          |
| 2572231724 | t3m_00080 | Metacyc        | GLUDEG-II-PWY: glutamate degradation VII (to butanoate) |          |
| 2572231724 | t3m_00080 | Metacyc        | PWY66-161: oxidative ethanol degradation III            |          |
| 2572231724 | t3m_00080 | Metacyc        | PWY-6672: <i>cis</i>-genanyl-CoA degradation            |          |
| 2572231724 | t3m_00080 | Metacyc        | PWY66-21: ethanol degradation II                        |          |
| 2572231724 | t3m_00080 | Metacyc        | PWY66-162: ethanol degradation IV                       |          |
| 2572231724 | t3m_00080 | Metacyc        | PWY0-1313: acetate conversion to acetyl-CoA             |          |
| 2572231724 | t3m_00080 | COG_category   | [I] Lipid transport and metabolism                      |          |
| 2572231724 | t3m_00080 | COG0365        | Acyl-coenzyme A synthetases/AMP-(fatty) acid ligases    | 0.00E+00 |
| 2572231724 | t3m_00080 | pfam00501      | AMP-binding                                             | 1.90E-85 |
| 2572231724 | t3m_00080 | pfam13193      | AMP-binding_C                                           | 1.80E-14 |
| 2572231724 | t3m_00080 | EC:6.2.1.1     | Acetate--CoA ligase.                                    |          |
| 2572231724 | t3m_00080 | TIGR02188      | acetate--CoA ligase                                     | 0.00E+00 |

|            |           |                |                                                           |          |
|------------|-----------|----------------|-----------------------------------------------------------|----------|
| 2572231724 | t3m_00080 | KO:K01895      | acetyl-CoA synthetase [EC:6.2.1.1]                        | 0.00E+00 |
| 2572231724 | t3m_00080 | Locus_type     | CDS                                                       |          |
| 2572231724 | t3m_00080 | Product_name   | acetyl-coenzyme A synthetase (EC 6.2.1.1)                 |          |
| 2572231724 | t3m_00080 | Scaffold       | t3m_contig_70_5_len_122850_read_count_10924403.1          |          |
| 2572231724 | t3m_00080 | Coordinates    | 84443..86494(+)                                           |          |
| 2572231724 | t3m_00080 | DNA_length     | 2052bp                                                    |          |
| 2572231724 | t3m_00080 | Protein_length | 683aa                                                     |          |
| 2572231724 | t3m_00080 | GC             |                                                           | 0.65     |
|            |           |                |                                                           |          |
| 2572231725 | t3m_00081 | COG_category   | [S] Function unknown                                      |          |
| 2572231725 | t3m_00081 | COG3371        | Predicted membrane protein                                | 2.00E-11 |
| 2572231725 | t3m_00081 | pfam06197      | DUF998                                                    | 1.50E-23 |
| 2572231725 | t3m_00081 | Locus_type     | CDS                                                       |          |
| 2572231725 | t3m_00081 | Product_name   | Predicted membrane protein                                |          |
| 2572231725 | t3m_00081 | Scaffold       | t3m_contig_70_5_len_122850_read_count_10924403.1          |          |
| 2572231725 | t3m_00081 | Coordinates    | 86587..87330(-)                                           |          |
| 2572231725 | t3m_00081 | DNA_length     | 744bp                                                     |          |
| 2572231725 | t3m_00081 | Protein_length | 247aa                                                     |          |
| 2572231725 | t3m_00081 | GC             |                                                           | 0.66     |
| 2572231725 | t3m_00081 | Transmembrane  | Yes                                                       |          |
|            |           |                |                                                           |          |
| 2572231726 | t3m_00082 | Locus_type     | CDS                                                       |          |
| 2572231726 | t3m_00082 | Product_name   | hypothetical protein                                      |          |
| 2572231726 | t3m_00082 | Scaffold       | t3m_contig_70_5_len_122850_read_count_10924403.1          |          |
| 2572231726 | t3m_00082 | Coordinates    | 87343..87486(-)                                           |          |
| 2572231726 | t3m_00082 | DNA_length     | 144bp                                                     |          |
| 2572231726 | t3m_00082 | Protein_length | 47aa                                                      |          |
| 2572231726 | t3m_00082 | GC             |                                                           | 0.72     |
|            |           |                |                                                           |          |
| 2572231727 | t3m_00083 | COG_category   | [H] Coenzyme transport and metabolism                     |          |
| 2572231727 | t3m_00083 | COG2226        | Methylase involved in ubiquinone/menaquinone biosynthesis | 4.00E-04 |
| 2572231727 | t3m_00083 | Locus_type     | CDS                                                       |          |
| 2572231727 | t3m_00083 | Product_name   | Methylase involved in ubiquinone/menaquinone biosynthesis |          |
| 2572231727 | t3m_00083 | Scaffold       | t3m_contig_70_5_len_122850_read_count_10924403.1          |          |

|            |           |                |                                                                         |          |
|------------|-----------|----------------|-------------------------------------------------------------------------|----------|
| 2572231727 | t3m_00083 | Coordinates    | 87536..88495(+)                                                         |          |
| 2572231727 | t3m_00083 | DNA_length     | 960bp                                                                   |          |
| 2572231727 | t3m_00083 | Protein_length | 319aa                                                                   |          |
| 2572231727 | t3m_00083 | GC             |                                                                         | 0.71     |
| 2572231728 | t3m_00084 | COG_category   | [T] Signal transduction mechanisms                                      |          |
| 2572231728 | t3m_00084 | COG0467        | RecA-superfamily ATPases implicated in signal transduction              | 1.00E-16 |
| 2572231728 | t3m_00084 | pfam06745      | KaiC                                                                    | 4.10E-11 |
| 2572231728 | t3m_00084 | Locus_type     | CDS                                                                     |          |
| 2572231728 | t3m_00084 | Product_name   | RecA-superfamily ATPases implicated in signal transduction              |          |
| 2572231728 | t3m_00084 | Scaffold       | t3m_contig_70_5_len_122850_read_count_10924403.1                        |          |
| 2572231728 | t3m_00084 | Coordinates    | 88527..91226(+)                                                         |          |
| 2572231728 | t3m_00084 | DNA_length     | 2700bp                                                                  |          |
| 2572231728 | t3m_00084 | Protein_length | 899aa                                                                   |          |
| 2572231728 | t3m_00084 | GC             |                                                                         | 0.68     |
| 2572231728 | t3m_00084 | Transmembrane  | Yes                                                                     |          |
| 2572231729 | t3m_00085 | COG_category   | [R] General function prediction only                                    |          |
| 2572231729 | t3m_00085 | COG_category   | [H] Coenzyme transport and metabolism                                   |          |
| 2572231729 | t3m_00085 | COG_category   | [C] Energy production and conversion                                    |          |
| 2572231729 | t3m_00085 | COG1052        | Lactate dehydrogenase and related dehydrogenases                        | 1.00E-40 |
| 2572231729 | t3m_00085 | pfam02826      | 2-Hacid_dh_C                                                            | 2.40E-36 |
| 2572231729 | t3m_00085 | Locus_type     | CDS                                                                     |          |
| 2572231729 | t3m_00085 | Product_name   | Lactate dehydrogenase and related dehydrogenases                        |          |
| 2572231729 | t3m_00085 | Scaffold       | t3m_contig_70_5_len_122850_read_count_10924403.1                        |          |
| 2572231729 | t3m_00085 | Coordinates    | 91329..92315(-)                                                         |          |
| 2572231729 | t3m_00085 | DNA_length     | 987bp                                                                   |          |
| 2572231729 | t3m_00085 | Protein_length | 328aa                                                                   |          |
| 2572231729 | t3m_00085 | GC             |                                                                         | 0.69     |
| 2572231730 | t3m_00086 | COG_category   | [R] General function prediction only                                    |          |
| 2572231730 | t3m_00086 | COG1011        | Predicted hydrolase (HAD superfamily)                                   | 3.00E-14 |
| 2572231730 | t3m_00086 | pfam13419      | HAD_2                                                                   | 1.30E-20 |
| 2572231730 | t3m_00086 | TIGR01549      | haloacid dehalogenase superfamily, subfamily IA, variant 1 with third m | 2.80E-11 |

|            |           |                |                                                                          |          |
|------------|-----------|----------------|--------------------------------------------------------------------------|----------|
| 2572231730 | t3m_00086 | KO:K07025      | putative hydrolase of the HAD superfamily                                | 1.40E-23 |
| 2572231730 | t3m_00086 | Locus_type     | CDS                                                                      |          |
| 2572231730 | t3m_00086 | Product_name   | haloacid dehalogenase superfamily, subfamily IA, variant 1 with third mc |          |
| 2572231730 | t3m_00086 | Scaffold       | t3m_contig_70_5_len_122850_read_count_10924403.1                         |          |
| 2572231730 | t3m_00086 | Coordinates    | 92456..93229(+)                                                          |          |
| 2572231730 | t3m_00086 | DNA_length     | 774bp                                                                    |          |
| 2572231730 | t3m_00086 | Protein_length | 257aa                                                                    |          |
| 2572231730 | t3m_00086 | GC             |                                                                          | 0.68     |
| 2572231731 | t3m_00087 | Locus_type     | CDS                                                                      |          |
| 2572231731 | t3m_00087 | Product_name   | hypothetical protein                                                     |          |
| 2572231731 | t3m_00087 | Scaffold       | t3m_contig_70_5_len_122850_read_count_10924403.1                         |          |
| 2572231731 | t3m_00087 | Coordinates    | 93249..93524(-)                                                          |          |
| 2572231731 | t3m_00087 | DNA_length     | 276bp                                                                    |          |
| 2572231731 | t3m_00087 | Protein_length | 91aa                                                                     |          |
| 2572231731 | t3m_00087 | GC             |                                                                          | 0.65     |
| 2572231732 | t3m_00088 | COG_category   | [S] Function unknown                                                     |          |
| 2572231732 | t3m_00088 | COG1584        | Predicted membrane protein                                               | 2.00E-16 |
| 2572231732 | t3m_00088 | pfam01184      | Grp1_Fun34_YaaH                                                          | 1.40E-19 |
| 2572231732 | t3m_00088 | Locus_type     | CDS                                                                      |          |
| 2572231732 | t3m_00088 | Product_name   | Predicted membrane protein                                               |          |
| 2572231732 | t3m_00088 | Scaffold       | t3m_contig_70_5_len_122850_read_count_10924403.1                         |          |
| 2572231732 | t3m_00088 | Coordinates    | 93788..94378(+)                                                          |          |
| 2572231732 | t3m_00088 | DNA_length     | 591bp                                                                    |          |
| 2572231732 | t3m_00088 | Protein_length | 196aa                                                                    |          |
| 2572231732 | t3m_00088 | GC             |                                                                          | 0.63     |
| 2572231732 | t3m_00088 | Transmembrane  | Yes                                                                      |          |
| 2572231733 | t3m_00089 | COG_category   | [S] Function unknown                                                     |          |
| 2572231733 | t3m_00089 | COG2410        | Uncharacterized conserved protein                                        | 7.00E-18 |
| 2572231733 | t3m_00089 | pfam04250      | DUF429                                                                   | 1.00E-25 |
| 2572231733 | t3m_00089 | KO:K09147      | hypothetical protein                                                     | 2.10E-27 |
| 2572231733 | t3m_00089 | Locus_type     | CDS                                                                      |          |

|            |           |                |                                                                   |           |
|------------|-----------|----------------|-------------------------------------------------------------------|-----------|
| 2572231733 | t3m_00089 | Product_name   | Uncharacterized conserved protein                                 |           |
| 2572231733 | t3m_00089 | Scaffold       | t3m_contig_70_5_len_122850_read_count_10924403.1                  |           |
| 2572231733 | t3m_00089 | Coordinates    | 94467..95189(+)                                                   |           |
| 2572231733 | t3m_00089 | DNA_length     | 723bp                                                             |           |
| 2572231733 | t3m_00089 | Protein_length | 240aa                                                             |           |
| 2572231733 | t3m_00089 | GC             |                                                                   | 0.67      |
| 2572231734 | t3m_00090 | COG_category   | [S] Function unknown                                              |           |
| 2572231734 | t3m_00090 | COG4280        | Predicted membrane protein                                        | 7.00E-16  |
| 2572231734 | t3m_00090 | Locus_type     | CDS                                                               |           |
| 2572231734 | t3m_00090 | Product_name   | Predicted membrane protein                                        |           |
| 2572231734 | t3m_00090 | Scaffold       | t3m_contig_70_5_len_122850_read_count_10924403.1                  |           |
| 2572231734 | t3m_00090 | Coordinates    | 95365..96072(-)                                                   |           |
| 2572231734 | t3m_00090 | DNA_length     | 708bp                                                             |           |
| 2572231734 | t3m_00090 | Protein_length | 235aa                                                             |           |
| 2572231734 | t3m_00090 | GC             |                                                                   | 0.7       |
| 2572231734 | t3m_00090 | Transmembrane  | Yes                                                               |           |
| 2572231735 | t3m_00091 | Locus_type     | CDS                                                               |           |
| 2572231735 | t3m_00091 | Product_name   | hypothetical protein                                              |           |
| 2572231735 | t3m_00091 | Scaffold       | t3m_contig_70_5_len_122850_read_count_10924403.1                  |           |
| 2572231735 | t3m_00091 | Coordinates    | 96157..96792(-)                                                   |           |
| 2572231735 | t3m_00091 | DNA_length     | 636bp                                                             |           |
| 2572231735 | t3m_00091 | Protein_length | 211aa                                                             |           |
| 2572231735 | t3m_00091 | GC             |                                                                   | 0.71      |
| 2572231736 | t3m_00092 | Metacyc        | GLUCONEO-PWY: gluconeogenesis I                                   |           |
| 2572231736 | t3m_00092 | Metacyc        | PWY-7118: chitin degradation to ethanol                           |           |
| 2572231736 | t3m_00092 | COG_category   | [C] Energy production and conversion                              |           |
| 2572231736 | t3m_00092 | COG0281        | Malic enzyme                                                      | 4.00E-106 |
| 2572231736 | t3m_00092 | pfam00390      | malic                                                             | 1.50E-66  |
| 2572231736 | t3m_00092 | pfam03949      | Malic_M                                                           | 8.20E-82  |
| 2572231736 | t3m_00092 | EC:1.1.1.38    | Malate dehydrogenase (oxaloacetate-decarboxylating).              |           |
| 2572231736 | t3m_00092 | KO:K00027      | malate dehydrogenase (oxaloacetate-decarboxylating) [EC:1.1.1.38] | 0.00E+00  |

|            |           |                |                                                  |      |
|------------|-----------|----------------|--------------------------------------------------|------|
| 2572231736 | t3m_00092 | Locus_type     | CDS                                              |      |
| 2572231736 | t3m_00092 | Product_name   | NAD-dependent malic enzyme (EC 1.1.1.38)         |      |
| 2572231736 | t3m_00092 | Scaffold       | t3m_contig_70_5_len_122850_read_count_10924403.1 |      |
| 2572231736 | t3m_00092 | Coordinates    | 96928..98565(-)                                  |      |
| 2572231736 | t3m_00092 | DNA_length     | 1638bp                                           |      |
| 2572231736 | t3m_00092 | Protein_length | 545aa                                            |      |
| 2572231736 | t3m_00092 | GC             |                                                  | 0.67 |
|            |           |                |                                                  |      |
| 2572231737 | t3m_00093 | Locus_type     | CDS                                              |      |
| 2572231737 | t3m_00093 | Product_name   | hypothetical protein                             |      |
| 2572231737 | t3m_00093 | Scaffold       | t3m_contig_70_5_len_122850_read_count_10924403.1 |      |
| 2572231737 | t3m_00093 | Coordinates    | 98866..99060(+)                                  |      |
| 2572231737 | t3m_00093 | DNA_length     | 195bp                                            |      |
| 2572231737 | t3m_00093 | Protein_length | 64aa                                             |      |
| 2572231737 | t3m_00093 | GC             |                                                  | 0.61 |
| 2572231737 | t3m_00093 | Transmembrane  | Yes                                              |      |
|            |           |                |                                                  |      |
| 2572231738 | t3m_00094 | Locus_type     | CDS                                              |      |
| 2572231738 | t3m_00094 | Product_name   | hypothetical protein                             |      |
| 2572231738 | t3m_00094 | Scaffold       | t3m_contig_70_5_len_122850_read_count_10924403.1 |      |
| 2572231738 | t3m_00094 | Coordinates    | 99151..99693(-)                                  |      |
| 2572231738 | t3m_00094 | DNA_length     | 543bp                                            |      |
| 2572231738 | t3m_00094 | Protein_length | 180aa                                            |      |
| 2572231738 | t3m_00094 | GC             |                                                  | 0.68 |
|            |           |                |                                                  |      |
| 2572231739 | t3m_00095 | Locus_type     | CDS                                              |      |
| 2572231739 | t3m_00095 | Product_name   | hypothetical protein                             |      |
| 2572231739 | t3m_00095 | Scaffold       | t3m_contig_70_5_len_122850_read_count_10924403.1 |      |
| 2572231739 | t3m_00095 | Coordinates    | 99766..100518(-)                                 |      |
| 2572231739 | t3m_00095 | DNA_length     | 753bp                                            |      |
| 2572231739 | t3m_00095 | Protein_length | 250aa                                            |      |
| 2572231739 | t3m_00095 | GC             |                                                  | 0.7  |
| 2572231739 | t3m_00095 | Transmembrane  | Yes                                              |      |



|            |           |                |                                                                                      |          |
|------------|-----------|----------------|--------------------------------------------------------------------------------------|----------|
| 2572231740 | t3m_00096 | Metacyc        | PWY-5740: GDP-L-colitose biosynthesis                                                |          |
| 2572231740 | t3m_00096 | Metacyc        | PWY-5738: GDP-6-deoxy-D-talose biosynthesis                                          |          |
| 2572231740 | t3m_00096 | Metacyc        | PWY-5739: GDP-&alpha;-D-perosamine biosynthesis                                      |          |
| 2572231740 | t3m_00096 | Metacyc        | GDPRHAMSYN-PWY: GDP-D-rhamnose biosynthesis                                          |          |
| 2572231740 | t3m_00096 | Metacyc        | PWY-66: GDP-L-fucose biosynthesis I (from GDP-D-mannose)                             |          |
| 2572231740 | t3m_00096 | COG_category   | [M] Cell wall/membrane/envelope biogenesis                                           |          |
| 2572231740 | t3m_00096 | COG_category   | [G] Carbohydrate transport and metabolism                                            |          |
| 2572231740 | t3m_00096 | COG0451        | Nucleoside-diphosphate-sugar epimerases                                              | 3.00E-46 |
| 2572231740 | t3m_00096 | pfam01370      | Epimerase                                                                            | 2.10E-48 |
| 2572231740 | t3m_00096 | EC:4.2.1.47    | GDP-mannose 4,6-dehydratase.                                                         |          |
| 2572231740 | t3m_00096 | KO:K01711      | GDPmannose 4,6-dehydratase [EC:4.2.1.47]                                             | 0.00E+00 |
| 2572231740 | t3m_00096 | Locus_type     | CDS                                                                                  |          |
| 2572231740 | t3m_00096 | Product_name   | Nucleoside-diphosphate-sugar epimerases                                              |          |
| 2572231740 | t3m_00096 | Scaffold       | t3m_contig_70_5_len_122850_read_count_10924403.1                                     |          |
| 2572231740 | t3m_00096 | Coordinates    | 100603..101556(-)                                                                    |          |
| 2572231740 | t3m_00096 | DNA_length     | 954bp                                                                                |          |
| 2572231740 | t3m_00096 | Protein_length | 317aa                                                                                |          |
| 2572231740 | t3m_00096 | GC             |                                                                                      | 0.68     |
| 2572231741 | t3m_00097 | Metacyc        | MANNOSYL-CHITO-DOLICHOL-BIOSYNTHESIS: dolichyl-diphosphooligosaccharide biosynthesis |          |
| 2572231741 | t3m_00097 | COG_category   | [M] Cell wall/membrane/envelope biogenesis                                           |          |
| 2572231741 | t3m_00097 | COG0463        | Glycosyltransferases involved in cell wall biogenesis                                | 6.00E-22 |
| 2572231741 | t3m_00097 | pfam00535      | Glycos_transf_2                                                                      | 1.90E-29 |
| 2572231741 | t3m_00097 | EC:2.4.1.83    | Dolichyl-phosphate beta-D-mannosyltransferase.                                       |          |
| 2572231741 | t3m_00097 | KO:K00721      | dolichol-phosphate mannosyltransferase [EC:2.4.1.83]                                 | 4.20E-42 |
| 2572231741 | t3m_00097 | Locus_type     | CDS                                                                                  |          |
| 2572231741 | t3m_00097 | Product_name   | Glycosyltransferases involved in cell wall biogenesis                                |          |
| 2572231741 | t3m_00097 | Scaffold       | t3m_contig_70_5_len_122850_read_count_10924403.1                                     |          |
| 2572231741 | t3m_00097 | Coordinates    | 101717..102469(-)                                                                    |          |
| 2572231741 | t3m_00097 | DNA_length     | 753bp                                                                                |          |
| 2572231741 | t3m_00097 | Protein_length | 250aa                                                                                |          |
| 2572231741 | t3m_00097 | GC             |                                                                                      | 0.69     |
| 2572231742 | t3m_00098 | Metacyc        | PWY-6478: GDP-D-<i>glycero</i>-&alpha;-D-<i>manno</i>-heptose biosynthesis           |          |

|            |           |                |                                                                                |          |
|------------|-----------|----------------|--------------------------------------------------------------------------------|----------|
| 2572231742 | t3m_00098 | COG_category   | [R] General function prediction only                                           |          |
| 2572231742 | t3m_00098 | COG2605        | Predicted kinase related to galactokinase and mevalonate kinase                | 3.00E-86 |
| 2572231742 | t3m_00098 | pfam08544      | GHMP_kinases_C                                                                 | 2.30E-12 |
| 2572231742 | t3m_00098 | pfam00288      | GHMP_kinases_N                                                                 | 4.00E-12 |
| 2572231742 | t3m_00098 | EC:2.7.1.168   | D-glycero-alpha-D-manno-heptose-7-phosphate kinase.                            |          |
| 2572231742 | t3m_00098 | KO:K07031      | D-glycero-alpha-D-manno-heptose-7-phosphate kinase [EC:2.7.1.168]              | 0.00E+00 |
| 2572231742 | t3m_00098 | Locus_type     | CDS                                                                            |          |
| 2572231742 | t3m_00098 | Product_name   | Predicted kinase related to galactokinase and mevalonate kinase                |          |
| 2572231742 | t3m_00098 | Scaffold       | t3m_contig_70_5_len_122850_read_count_10924403.1                               |          |
| 2572231742 | t3m_00098 | Coordinates    | 102485..103531(-)                                                              |          |
| 2572231742 | t3m_00098 | DNA_length     | 1047bp                                                                         |          |
| 2572231742 | t3m_00098 | Protein_length | 348aa                                                                          |          |
| 2572231742 | t3m_00098 | GC             |                                                                                | 0.64     |
|            |           |                |                                                                                |          |
| 2572231743 | t3m_00099 | Metacyc        | PWY-6502: oxidized GTP and dGTP detoxification                                 |          |
| 2572231743 | t3m_00099 | Metacyc        | PWY-6575: juvenile hormone III biosynthesis I                                  |          |
| 2572231743 | t3m_00099 | Metacyc        | PWY-6797: 6-hydroxymethyl-dihydropterin diphosphate biosynthesis II (archaea)  |          |
| 2572231743 | t3m_00099 | Metacyc        | PWY-6383: mono-<i>trans</i>, poly-<i>cis</i> decaprenyl phosphate biosynthesis |          |
| 2572231743 | t3m_00099 | Metacyc        | PWY-6147: 6-hydroxymethyl-dihydropterin diphosphate biosynthesis I             |          |
| 2572231743 | t3m_00099 | Metacyc        | PWY-7206: pyrimidine deoxyribonucleotides dephosphorylation                    |          |
| 2572231743 | t3m_00099 | COG_category   | [F] Nucleotide transport and metabolism                                        |          |
| 2572231743 | t3m_00099 | COG1051        | ADP-ribose pyrophosphatase                                                     | 2.00E-26 |
| 2572231743 | t3m_00099 | pfam00293      | NUDIX                                                                          | 3.20E-25 |
| 2572231743 | t3m_00099 | EC:3.6.1.-     | Hydrolases. Acting on acid anhydrides. In phosphorous-containing anhydrides.   |          |
| 2572231743 | t3m_00099 | KO:K03574      | 7,8-dihydro-8-oxoguanine triphosphatase [EC:3.6.1.-]                           | 3.60E-28 |
| 2572231743 | t3m_00099 | Locus_type     | CDS                                                                            |          |
| 2572231743 | t3m_00099 | Product_name   | ADP-ribose pyrophosphatase                                                     |          |
| 2572231743 | t3m_00099 | Scaffold       | t3m_contig_70_5_len_122850_read_count_10924403.1                               |          |
| 2572231743 | t3m_00099 | Coordinates    | 103673..104140(+)                                                              |          |
| 2572231743 | t3m_00099 | DNA_length     | 468bp                                                                          |          |
| 2572231743 | t3m_00099 | Protein_length | 155aa                                                                          |          |
| 2572231743 | t3m_00099 | GC             |                                                                                | 0.71     |
|            |           |                |                                                                                |          |
| 2572231744 | t3m_00100 | COG_category   | [S] Function unknown                                                           |          |

|            |           |                |                                                  |          |
|------------|-----------|----------------|--------------------------------------------------|----------|
| 2572231744 | t3m_00100 | COG1814        | Uncharacterized membrane protein                 | 6.00E-15 |
| 2572231744 | t3m_00100 | pfam01988      | VIT1                                             | 5.90E-47 |
| 2572231744 | t3m_00100 | TIGR00267      | TIGR00267 family protein                         | 9.90E-15 |
| 2572231744 | t3m_00100 | Locus_type     | CDS                                              |          |
| 2572231744 | t3m_00100 | Product_name   | Uncharacterized membrane protein                 |          |
| 2572231744 | t3m_00100 | Scaffold       | t3m_contig_70_5_len_122850_read_count_10924403.1 |          |
| 2572231744 | t3m_00100 | Coordinates    | 104237..104950(+)                                |          |
| 2572231744 | t3m_00100 | DNA_length     | 714bp                                            |          |
| 2572231744 | t3m_00100 | Protein_length | 237aa                                            |          |
| 2572231744 | t3m_00100 | GC             |                                                  | 0.65     |
| 2572231744 | t3m_00100 | Transmembrane  | Yes                                              |          |
|            |           |                |                                                  |          |
| 2572231745 | t3m_00101 | Locus_type     | CDS                                              |          |
| 2572231745 | t3m_00101 | Product_name   | hypothetical protein                             |          |
| 2572231745 | t3m_00101 | Scaffold       | t3m_contig_70_5_len_122850_read_count_10924403.1 |          |
| 2572231745 | t3m_00101 | Coordinates    | 105317..106183(-)                                |          |
| 2572231745 | t3m_00101 | DNA_length     | 867bp                                            |          |
| 2572231745 | t3m_00101 | Protein_length | 288aa                                            |          |
| 2572231745 | t3m_00101 | GC             |                                                  | 0.65     |
|            |           |                |                                                  |          |
| 2572231746 | t3m_00102 | COG_category   | [M] Cell wall/membrane/envelope biogenesis       |          |
| 2572231746 | t3m_00102 | COG_category   | [G] Carbohydrate transport and metabolism        |          |
| 2572231746 | t3m_00102 | COG0451        | Nucleoside-diphosphate-sugar epimerases          | 1.00E-15 |
| 2572231746 | t3m_00102 | pfam13460      | NAD_binding_10                                   | 9.20E-22 |
| 2572231746 | t3m_00102 | EC:1.6.99.3    | NADH dehydrogenase.                              |          |
| 2572231746 | t3m_00102 | KO:K00356      | NADH dehydrogenase [EC:1.6.99.3]                 | 4.70E-23 |
| 2572231746 | t3m_00102 | Locus_type     | CDS                                              |          |
| 2572231746 | t3m_00102 | Product_name   | Nucleoside-diphosphate-sugar epimerases          |          |
| 2572231746 | t3m_00102 | Scaffold       | t3m_contig_70_5_len_122850_read_count_10924403.1 |          |
| 2572231746 | t3m_00102 | Coordinates    | 106274..107194(-)                                |          |
| 2572231746 | t3m_00102 | DNA_length     | 921bp                                            |          |
| 2572231746 | t3m_00102 | Protein_length | 306aa                                            |          |
| 2572231746 | t3m_00102 | GC             |                                                  | 0.69     |

|            |           |                |                                                                                |           |
|------------|-----------|----------------|--------------------------------------------------------------------------------|-----------|
| 2572231747 | t3m_00103 | Metacyc        | PWY-6987: lipoate biosynthesis and incorporation III (Bacillus)                |           |
| 2572231747 | t3m_00103 | Metacyc        | PWY0-501: lipoate biosynthesis and incorporation I                             |           |
| 2572231747 | t3m_00103 | COG_category   | [H] Coenzyme transport and metabolism                                          |           |
| 2572231747 | t3m_00103 | COG0321        | Lipoate-protein ligase B                                                       | 2.00E-56  |
| 2572231747 | t3m_00103 | pfam03099      | BPL_LplA_LipB                                                                  | 1.20E-14  |
| 2572231747 | t3m_00103 | EC:2.3.1.181   | Lipoyl(octanoyl) transferase.                                                  |           |
| 2572231747 | t3m_00103 | TIGR00214      | lipoate-protein ligase B                                                       | 1.50E-47  |
| 2572231747 | t3m_00103 | KO:K03801      | lipoyl(octanoyl) transferase [EC:2.3.1.181]                                    | 5.20E-43  |
| 2572231747 | t3m_00103 | Locus_type     | CDS                                                                            |           |
| 2572231747 | t3m_00103 | Product_name   | lipoate-protein ligase B                                                       |           |
| 2572231747 | t3m_00103 | Scaffold       | t3m_contig_70_5_len_122850_read_count_10924403.1                               |           |
| 2572231747 | t3m_00103 | Coordinates    | 107197..107859(-)                                                              |           |
| 2572231747 | t3m_00103 | DNA_length     | 663bp                                                                          |           |
| 2572231747 | t3m_00103 | Protein_length | 220aa                                                                          |           |
| 2572231747 | t3m_00103 | GC             |                                                                                | 0.7       |
| 2572231748 | t3m_00104 | KEGG_module    | M00036: Leucine degradation, leucine => acetoacetate + acetyl-CoA              |           |
| 2572231748 | t3m_00104 | KEGG_module    | M00009: Citrate cycle (TCA cycle, Krebs cycle)                                 |           |
| 2572231748 | t3m_00104 | KEGG_module    | M00011: Citrate cycle, second carbon oxidation, 2-oxoglutarate => oxaloacetate |           |
| 2572231748 | t3m_00104 | KEGG_module    | M00307: Pyruvate oxidation, pyruvate => acetyl-CoA                             |           |
| 2572231748 | t3m_00104 | Metacyc        | PYRUVDEHYD-PWY: pyruvate decarboxylation to acetyl CoA                         |           |
| 2572231748 | t3m_00104 | Metacyc        | PWY-5084: 2-oxoglutarate decarboxylation to succinyl-CoA                       |           |
| 2572231748 | t3m_00104 | Metacyc        | PWY-5046: 2-oxoisovalerate decarboxylation to isobutanoyl-CoA                  |           |
| 2572231748 | t3m_00104 | Metacyc        | GLYCLEAV-PWY: glycine cleavage                                                 |           |
| 2572231748 | t3m_00104 | COG_category   | [C] Energy production and conversion                                           |           |
| 2572231748 | t3m_00104 | COG1249        | Pyruvate/2-oxoglutarate dehydrogenase complex, dihydrolipoamide de             | 1.00E-125 |
| 2572231748 | t3m_00104 | pfam07992      | Pyr_redox_2                                                                    | 1.20E-35  |
| 2572231748 | t3m_00104 | pfam02852      | Pyr_redox_dim                                                                  | 2.00E-30  |
| 2572231748 | t3m_00104 | pfam00070      | Pyr_redox                                                                      | 3.00E-17  |
| 2572231748 | t3m_00104 | EC:1.8.1.4     | Dihydrolipoyl dehydrogenase.                                                   |           |
| 2572231748 | t3m_00104 | TIGR01350      | dihydrolipoamide dehydrogenase                                                 | 0.00E+00  |
| 2572231748 | t3m_00104 | KO:K00382      | dihydrolipoamide dehydrogenase [EC:1.8.1.4]                                    | 0.00E+00  |
| 2572231748 | t3m_00104 | Locus_type     | CDS                                                                            |           |
| 2572231748 | t3m_00104 | Product_name   | dihydrolipoamide dehydrogenase                                                 |           |

|            |           |                |                                                                         |           |
|------------|-----------|----------------|-------------------------------------------------------------------------|-----------|
| 2572231748 | t3m_00104 | Scaffold       | t3m_contig_70_5_len_122850_read_count_10924403.1                        |           |
| 2572231748 | t3m_00104 | Coordinates    | 107843..109336(-)                                                       |           |
| 2572231748 | t3m_00104 | DNA_length     | 1494bp                                                                  |           |
| 2572231748 | t3m_00104 | Protein_length | 497aa                                                                   |           |
| 2572231748 | t3m_00104 | GC             |                                                                         | 0.68      |
|            |           |                |                                                                         |           |
| 2572231749 | t3m_00105 | KEGG_module    | M00036: Leucine degradation, leucine => acetoacetate + acetyl-CoA       |           |
| 2572231749 | t3m_00105 | Metacyc        | PWY-5046: 2-oxoisovalerate decarboxylation to isobutanoyl-CoA           |           |
| 2572231749 | t3m_00105 | COG_category   | [C] Energy production and conversion                                    |           |
| 2572231749 | t3m_00105 | COG1071        | Pyruvate/2-oxoglutarate dehydrogenase complex, dehydrogenase (E1)       | 7.00E-82  |
| 2572231749 | t3m_00105 | pfam00676      | E1_dh                                                                   | 4.80E-70  |
| 2572231749 | t3m_00105 | EC:1.2.4.4     | 3-methyl-2-oxobutanoate dehydrogenase (2-methylpropanoyl-transferring). |           |
| 2572231749 | t3m_00105 | KO:K00166      | 2-oxoisovalerate dehydrogenase E1 component, alpha subunit [EC:1.2.4.4] | 0.00E+00  |
| 2572231749 | t3m_00105 | Locus_type     | CDS                                                                     |           |
| 2572231749 | t3m_00105 | Product_name   | Pyruvate/2-oxoglutarate dehydrogenase complex, dehydrogenase (E1) c     |           |
| 2572231749 | t3m_00105 | Scaffold       | t3m_contig_70_5_len_122850_read_count_10924403.1                        |           |
| 2572231749 | t3m_00105 | Coordinates    | 109296..110351(-)                                                       |           |
| 2572231749 | t3m_00105 | DNA_length     | 1056bp                                                                  |           |
| 2572231749 | t3m_00105 | Protein_length | 351aa                                                                   |           |
| 2572231749 | t3m_00105 | GC             |                                                                         | 0.67      |
|            |           |                |                                                                         |           |
| 2572231750 | t3m_00106 | KEGG_module    | M00307: Pyruvate oxidation, pyruvate => acetyl-CoA                      |           |
| 2572231750 | t3m_00106 | Metacyc        | PYRUVDEHYD-PWY: pyruvate decarboxylation to acetyl CoA                  |           |
| 2572231750 | t3m_00106 | COG_category   | [C] Energy production and conversion                                    |           |
| 2572231750 | t3m_00106 | COG0508        | Pyruvate/2-oxoglutarate dehydrogenase complex, dihydrolipoamide ac      | 2.00E-106 |
| 2572231750 | t3m_00106 | pfam00364      | Biotin_lipoyl                                                           | 9.30E-22  |
| 2572231750 | t3m_00106 | pfam00198      | 2-oxoacid_dh                                                            | 8.10E-81  |
| 2572231750 | t3m_00106 | pfam02817      | E3_binding                                                              | 1.00E-14  |
| 2572231750 | t3m_00106 | EC:2.3.1.12    | Dihydrolipoyllysine-residue acetyltransferase.                          |           |
| 2572231750 | t3m_00106 | KO:K00627      | pyruvate dehydrogenase E2 component (dihydrolipoamide acetyltransf      | 0.00E+00  |
| 2572231750 | t3m_00106 | Locus_type     | CDS                                                                     |           |
| 2572231750 | t3m_00106 | Product_name   | Pyruvate/2-oxoglutarate dehydrogenase complex, dihydrolipoamide acy     |           |
| 2572231750 | t3m_00106 | Scaffold       | t3m_contig_70_5_len_122850_read_count_10924403.1                        |           |
| 2572231750 | t3m_00106 | Coordinates    | 110348..111643(-)                                                       |           |

|            |           |                |                                                                         |           |
|------------|-----------|----------------|-------------------------------------------------------------------------|-----------|
| 2572231750 | t3m_00106 | DNA_length     | 1296bp                                                                  |           |
| 2572231750 | t3m_00106 | Protein_length | 431aa                                                                   |           |
| 2572231750 | t3m_00106 | GC             |                                                                         | 0.68      |
| 2572231751 | t3m_00107 | KEGG_module    | M00036: Leucine degradation, leucine => acetoacetate + acetyl-CoA       |           |
| 2572231751 | t3m_00107 | Metacyc        | PWY-5046: 2-oxoisovalerate decarboxylation to isobutanoyl-CoA           |           |
| 2572231751 | t3m_00107 | COG_category   | [C] Energy production and conversion                                    |           |
| 2572231751 | t3m_00107 | COG0022        | Pyruvate/2-oxoglutarate dehydrogenase complex, dehydrogenase (E1)       | 0.00E+00  |
| 2572231751 | t3m_00107 | pfam02779      | Transket_pyr                                                            | 3.40E-46  |
| 2572231751 | t3m_00107 | pfam02780      | Transketolase_C                                                         | 1.90E-39  |
| 2572231751 | t3m_00107 | EC:1.2.4.4     | 3-methyl-2-oxobutanoate dehydrogenase (2-methylpropanoyl-transferring). |           |
| 2572231751 | t3m_00107 | KO:K00167      | 2-oxoisovalerate dehydrogenase E1 component, beta subunit [EC:1.2.4.    | 0.00E+00  |
| 2572231751 | t3m_00107 | Locus_type     | CDS                                                                     |           |
| 2572231751 | t3m_00107 | Product_name   | Pyruvate/2-oxoglutarate dehydrogenase complex, dehydrogenase (E1) c     |           |
| 2572231751 | t3m_00107 | Scaffold       | t3m_contig_70_5_len_122850_read_count_10924403.1                        |           |
| 2572231751 | t3m_00107 | Coordinates    | 111653..112630(-)                                                       |           |
| 2572231751 | t3m_00107 | DNA_length     | 978bp                                                                   |           |
| 2572231751 | t3m_00107 | Protein_length | 325aa                                                                   |           |
| 2572231751 | t3m_00107 | GC             |                                                                         | 0.66      |
| 2572231752 | t3m_00108 | KEGG_module    | M00036: Leucine degradation, leucine => acetoacetate + acetyl-CoA       |           |
| 2572231752 | t3m_00108 | Metacyc        | PWY-5046: 2-oxoisovalerate decarboxylation to isobutanoyl-CoA           |           |
| 2572231752 | t3m_00108 | COG_category   | [C] Energy production and conversion                                    |           |
| 2572231752 | t3m_00108 | COG1071        | Pyruvate/2-oxoglutarate dehydrogenase complex, dehydrogenase (E1)       | 9.00E-108 |
| 2572231752 | t3m_00108 | pfam00676      | E1_dh                                                                   | 4.40E-94  |
| 2572231752 | t3m_00108 | EC:1.2.4.4     | 3-methyl-2-oxobutanoate dehydrogenase (2-methylpropanoyl-transferring). |           |
| 2572231752 | t3m_00108 | TIGR03181      | pyruvate dehydrogenase E1 component, alpha subunit                      | 4.50E-126 |
| 2572231752 | t3m_00108 | KO:K00166      | 2-oxoisovalerate dehydrogenase E1 component, alpha subunit [EC:1.2.4.   | 0.00E+00  |
| 2572231752 | t3m_00108 | Locus_type     | CDS                                                                     |           |
| 2572231752 | t3m_00108 | Product_name   | Pyruvate/2-oxoglutarate dehydrogenase complex, dehydrogenase (E1) c     |           |
| 2572231752 | t3m_00108 | Scaffold       | t3m_contig_70_5_len_122850_read_count_10924403.1                        |           |
| 2572231752 | t3m_00108 | Coordinates    | 112627..113706(-)                                                       |           |
| 2572231752 | t3m_00108 | DNA_length     | 1080bp                                                                  |           |
| 2572231752 | t3m_00108 | Protein_length | 359aa                                                                   |           |

|            |           |                |                                                                                  |           |
|------------|-----------|----------------|----------------------------------------------------------------------------------|-----------|
| 2572231752 | t3m_00108 | GC             |                                                                                  | 0.66      |
| 2572231753 | t3m_00109 | COG_category   | [K] Transcription                                                                |           |
| 2572231753 | t3m_00109 | COG_category   | [L] Replication, recombination and repair                                        |           |
| 2572231753 | t3m_00109 | COG_category   | [J] Translation, ribosomal structure and biogenesis                              |           |
| 2572231753 | t3m_00109 | COG0513        | Superfamily II DNA and RNA helicases                                             | 3.00E-111 |
| 2572231753 | t3m_00109 | pfam00271      | Helicase_C                                                                       | 5.00E-27  |
| 2572231753 | t3m_00109 | pfam00270      | DEAD                                                                             | 8.00E-45  |
| 2572231753 | t3m_00109 | EC:3.6.4.13    | RNA helicase.                                                                    |           |
| 2572231753 | t3m_00109 | KO:K11927      | ATP-dependent RNA helicase RhIE [EC:3.6.4.13]                                    | 0.00E+00  |
| 2572231753 | t3m_00109 | Locus_type     | CDS                                                                              |           |
| 2572231753 | t3m_00109 | Product_name   | Superfamily II DNA and RNA helicases                                             |           |
| 2572231753 | t3m_00109 | Scaffold       | t3m_contig_70_5_len_122850_read_count_10924403.1                                 |           |
| 2572231753 | t3m_00109 | Coordinates    | 113852..115102(-)                                                                |           |
| 2572231753 | t3m_00109 | DNA_length     | 1251bp                                                                           |           |
| 2572231753 | t3m_00109 | Protein_length | 416aa                                                                            |           |
| 2572231753 | t3m_00109 | GC             |                                                                                  | 0.67      |
| 2572231754 | t3m_00110 | COG_category   | [E] Amino acid transport and metabolism                                          |           |
| 2572231754 | t3m_00110 | COG_category   | [T] Signal transduction mechanisms                                               |           |
| 2572231754 | t3m_00110 | COG0834        | ABC-type amino acid transport/signal transduction systems, periplasmic           | 1.00E-22  |
| 2572231754 | t3m_00110 | pfam00497      | SBP_bac_3                                                                        | 1.40E-33  |
| 2572231754 | t3m_00110 | ITERM:05951    | amino acid ABC transporter substrate-binding protein, PAAT family (TC 3.A.1.3.-) |           |
| 2572231754 | t3m_00110 | Locus_type     | CDS                                                                              |           |
| 2572231754 | t3m_00110 | Product_name   | amino acid ABC transporter substrate-binding protein, PAAT family (TC 3          |           |
| 2572231754 | t3m_00110 | Scaffold       | t3m_contig_70_5_len_122850_read_count_10924403.1                                 |           |
| 2572231754 | t3m_00110 | Coordinates    | 115377..116234(+)                                                                |           |
| 2572231754 | t3m_00110 | DNA_length     | 858bp                                                                            |           |
| 2572231754 | t3m_00110 | Protein_length | 285aa                                                                            |           |
| 2572231754 | t3m_00110 | GC             |                                                                                  | 0.62      |
| 2572231754 | t3m_00110 | Transmembrane  | Yes                                                                              |           |
| 2572231755 | t3m_00111 | KEGG_module    | M00234: Cystine transport system                                                 |           |
| 2572231755 | t3m_00111 | COG_category   | [E] Amino acid transport and metabolism                                          |           |

|            |           |                |                                                                       |           |
|------------|-----------|----------------|-----------------------------------------------------------------------|-----------|
| 2572231755 | t3m_00111 | COG0765        | ABC-type amino acid transport system, permease component              | 3.00E-37  |
| 2572231755 | t3m_00111 | pfam00528      | BPD_transp_1                                                          | 9.90E-17  |
| 2572231755 | t3m_00111 | TIGR01726      | amine acid ABC transporter, permease protein, 3-TM region, His/Glu/Gl | 6.90E-14  |
| 2572231755 | t3m_00111 | KO:K10009      | cystine transport system permease protein                             | 4.40E-32  |
| 2572231755 | t3m_00111 | Locus_type     | CDS                                                                   |           |
| 2572231755 | t3m_00111 | Product_name   | ABC-type amino acid transport system, permease component              |           |
| 2572231755 | t3m_00111 | Scaffold       | t3m_contig_70_5_len_122850_read_count_10924403.1                      |           |
| 2572231755 | t3m_00111 | Coordinates    | 116347..117273(+)                                                     |           |
| 2572231755 | t3m_00111 | DNA_length     | 927bp                                                                 |           |
| 2572231755 | t3m_00111 | Protein_length | 308aa                                                                 |           |
| 2572231755 | t3m_00111 | GC             |                                                                       | 0.65      |
| 2572231755 | t3m_00111 | Transmembrane  | Yes                                                                   |           |
| 2572231756 | t3m_00112 | KEGG_module    | M00236: Putative polar amino acid transport system                    |           |
| 2572231756 | t3m_00112 | COG_category   | [E] Amino acid transport and metabolism                               |           |
| 2572231756 | t3m_00112 | COG1126        | ABC-type polar amino acid transport system, ATPase component          | 2.00E-102 |
| 2572231756 | t3m_00112 | pfam00005      | ABC_tran                                                              | 5.40E-35  |
| 2572231756 | t3m_00112 | EC:3.6.3.21    | Polar-amino-acid-transporting ATPase.                                 |           |
| 2572231756 | t3m_00112 | KO:K02028      | polar amino acid transport system ATP-binding protein [EC:3.6.3.21]   | 0.00E+00  |
| 2572231756 | t3m_00112 | Locus_type     | CDS                                                                   |           |
| 2572231756 | t3m_00112 | Product_name   | ABC-type polar amino acid transport system, ATPase component          |           |
| 2572231756 | t3m_00112 | Scaffold       | t3m_contig_70_5_len_122850_read_count_10924403.1                      |           |
| 2572231756 | t3m_00112 | Coordinates    | 117270..118001(+)                                                     |           |
| 2572231756 | t3m_00112 | DNA_length     | 732bp                                                                 |           |
| 2572231756 | t3m_00112 | Protein_length | 243aa                                                                 |           |
| 2572231756 | t3m_00112 | GC             |                                                                       | 0.63      |
| 2572231757 | t3m_00113 | KEGG_module    | M00236: Putative polar amino acid transport system                    |           |
| 2572231757 | t3m_00113 | COG_category   | [E] Amino acid transport and metabolism                               |           |
| 2572231757 | t3m_00113 | COG0765        | ABC-type amino acid transport system, permease component              | 2.00E-34  |
| 2572231757 | t3m_00113 | pfam00528      | BPD_transp_1                                                          | 2.60E-18  |
| 2572231757 | t3m_00113 | KO:K02029      | polar amino acid transport system permease protein                    | 1.40E-24  |
| 2572231757 | t3m_00113 | Locus_type     | CDS                                                                   |           |
| 2572231757 | t3m_00113 | Product_name   | ABC-type amino acid transport system, permease component              |           |



|            |           |                |                           |                                                  |          |
|------------|-----------|----------------|---------------------------|--------------------------------------------------|----------|
| 2572231757 | t3m_00113 | Scaffold       |                           | t3m_contig_70_5_len_122850_read_count_10924403.1 |          |
| 2572231757 | t3m_00113 | Coordinates    |                           | 118122..119132(+)                                |          |
| 2572231757 | t3m_00113 | DNA_length     |                           | 1011bp                                           |          |
| 2572231757 | t3m_00113 | Protein_length |                           | 336aa                                            |          |
| 2572231757 | t3m_00113 | GC             |                           |                                                  | 0.63     |
| 2572231757 | t3m_00113 | Transmembrane  |                           | Yes                                              |          |
|            |           |                |                           |                                                  |          |
| 2572231758 | t3m_00114 | Locus_type     |                           | CDS                                              |          |
| 2572231758 | t3m_00114 | Product_name   |                           | hypothetical protein                             |          |
| 2572231758 | t3m_00114 | Scaffold       |                           | t3m_contig_70_5_len_122850_read_count_10924403.1 |          |
| 2572231758 | t3m_00114 | Coordinates    |                           | 119939..122677(+)                                |          |
| 2572231758 | t3m_00114 | DNA_length     |                           | 2739bp                                           |          |
| 2572231758 | t3m_00114 | Protein_length |                           | 912aa                                            |          |
| 2572231758 | t3m_00114 | GC             |                           |                                                  | 0.63     |
|            |           |                |                           |                                                  |          |
| 2572231759 | t3m_00115 | Locus_type     |                           | tRNA                                             |          |
| 2572231759 | t3m_00115 | Product_name   |                           | tRNA_Ile_GAT                                     |          |
| 2572231759 | t3m_00115 | Scaffold       |                           | t3m_contig_70_5_len_122850_read_count_10924403.1 |          |
| 2572231759 | t3m_00115 | Coordinates    |                           | 122781..122840(+)                                |          |
| 2572231759 | t3m_00115 | DNA_length     |                           | 60bp                                             |          |
| 2572231759 | t3m_00115 | GC             |                           |                                                  | 0.57     |
|            |           |                |                           |                                                  |          |
| 2572231760 | t3m_00116 | pfam13248      | zf-ribbon_3               |                                                  | 1.10E-05 |
| 2572231760 | t3m_00116 | Locus_type     |                           | CDS                                              |          |
| 2572231760 | t3m_00116 | Product_name   |                           | zinc-ribbon domain                               |          |
| 2572231760 | t3m_00116 | Scaffold       |                           | t3m_contig_70_18_len_82197_read_count_6592593.2  |          |
| 2572231760 | t3m_00116 | Coordinates    |                           | 3..176(+)                                        |          |
| 2572231760 | t3m_00116 | DNA_length     |                           | 174bp                                            |          |
| 2572231760 | t3m_00116 | Protein_length |                           | 57aa                                             |          |
| 2572231760 | t3m_00116 | GC             |                           |                                                  | 0.76     |
|            |           |                |                           |                                                  |          |
| 2572231761 | t3m_00117 | pfam05317      | Thermopsin                |                                                  | 2.50E-46 |
| 2572231761 | t3m_00117 | EC:3.4.23.42   | Thermopsin.               |                                                  |          |
| 2572231761 | t3m_00117 | KO:K01385      | thermopsin [EC:3.4.23.42] |                                                  | 0.00E+00 |

|            |           |                |                                                                    |          |
|------------|-----------|----------------|--------------------------------------------------------------------|----------|
| 2572231761 | t3m_00117 | Locus_type     | CDS                                                                |          |
| 2572231761 | t3m_00117 | Product_name   | Thermopsin                                                         |          |
| 2572231761 | t3m_00117 | Scaffold       | t3m_contig_70_18_len_82197_read_count_6592593.2                    |          |
| 2572231761 | t3m_00117 | Coordinates    | 655..3168(+)                                                       |          |
| 2572231761 | t3m_00117 | DNA_length     | 2514bp                                                             |          |
| 2572231761 | t3m_00117 | Protein_length | 837aa                                                              |          |
| 2572231761 | t3m_00117 | GC             |                                                                    | 0.64     |
| 2572231761 | t3m_00117 | Transmembrane  | Yes                                                                |          |
|            |           |                |                                                                    |          |
| 2572231762 | t3m_00118 | KEGG_module    | M00169: CAM (Crassulacean acid metabolism), light                  |          |
| 2572231762 | t3m_00118 | KEGG_module    | M00173: Reductive citric acid cycle (Arnon-Buchanan cycle)         |          |
| 2572231762 | t3m_00118 | KEGG_module    | M00172: C4-dicarboxylic acid cycle, NADP+ -malic enzyme type       |          |
| 2572231762 | t3m_00118 | KEGG_module    | M00171: C4-dicarboxylic acid cycle, NAD+ -malic enzyme type        |          |
| 2572231762 | t3m_00118 | Metacyc        | PWY-7115: C4 photosynthetic carbon assimilation cycle, NAD-ME type |          |
| 2572231762 | t3m_00118 | Metacyc        | PWY-7117: C4 photosynthetic carbon assimilation cycle, PEPCK type  |          |
| 2572231762 | t3m_00118 | Metacyc        | PWY-6549: glutamine biosynthesis III                               |          |
| 2572231762 | t3m_00118 | Metacyc        | PWY-241: C4 photosynthetic carbon assimilation cycle, NADP-ME type |          |
| 2572231762 | t3m_00118 | IMG_pathway    | 289: Oxaloacetate synthesis via phosphoenolpyruvate                |          |
| 2572231762 | t3m_00118 | COG_category   | [G] Carbohydrate transport and metabolism                          |          |
| 2572231762 | t3m_00118 | COG0574        | Phosphoenolpyruvate synthase/pyruvate phosphate dikinase           | 0.00E+00 |
| 2572231762 | t3m_00118 | pfam00391      | PEP-utilizers                                                      | 1.60E-22 |
| 2572231762 | t3m_00118 | pfam02896      | PEP-utilizers_C                                                    | 1.50E-93 |
| 2572231762 | t3m_00118 | pfam01326      | PPDK_N                                                             | 1.10E-59 |
| 2572231762 | t3m_00118 | EC:2.7.9.1     | Pyruvate, phosphate dikinase.                                      |          |
| 2572231762 | t3m_00118 | TIGR01828      | pyruvate, phosphate dikinase                                       | 0.00E+00 |
| 2572231762 | t3m_00118 | KO:K01006      | pyruvate,orthophosphate dikinase [EC:2.7.9.1]                      | 0.00E+00 |
| 2572231762 | t3m_00118 | ITERM:00813    | pyruvate phosphate dikinase (EC 2.7.9.1)                           |          |
| 2572231762 | t3m_00118 | Locus_type     | CDS                                                                |          |
| 2572231762 | t3m_00118 | Product_name   | pyruvate phosphate dikinase (EC 2.7.9.1)                           |          |
| 2572231762 | t3m_00118 | Scaffold       | t3m_contig_70_18_len_82197_read_count_6592593.2                    |          |
| 2572231762 | t3m_00118 | Coordinates    | 3451..6099(+)                                                      |          |
| 2572231762 | t3m_00118 | DNA_length     | 2649bp                                                             |          |
| 2572231762 | t3m_00118 | Protein_length | 882aa                                                              |          |
| 2572231762 | t3m_00118 | GC             |                                                                    | 0.67     |

|            |           |                |                                                       |          |
|------------|-----------|----------------|-------------------------------------------------------|----------|
| 2572231763 | t3m_00119 | KEGG_module    | M00248: Putative antibiotic transport system          |          |
| 2572231763 | t3m_00119 | COG_category   | [V] Defense mechanisms                                |          |
| 2572231763 | t3m_00119 | COG1131        | ABC-type multidrug transport system, ATPase component | 4.00E-59 |
| 2572231763 | t3m_00119 | pfam00005      | ABC_tran                                              | 1.50E-22 |
| 2572231763 | t3m_00119 | KO:K09687      | antibiotic transport system ATP-binding protein       | 0.00E+00 |
| 2572231763 | t3m_00119 | Locus_type     | CDS                                                   |          |
| 2572231763 | t3m_00119 | Product_name   | ABC-type multidrug transport system, ATPase component |          |
| 2572231763 | t3m_00119 | Scaffold       | t3m_contig_70_18_len_82197_read_count_6592593.2       |          |
| 2572231763 | t3m_00119 | Coordinates    | 6210..7217(+)                                         |          |
| 2572231763 | t3m_00119 | DNA_length     | 1008bp                                                |          |
| 2572231763 | t3m_00119 | Protein_length | 335aa                                                 |          |
| 2572231763 | t3m_00119 | GC             |                                                       | 0.7      |
| 2572231764 | t3m_00120 | pfam12730      | ABC2_membrane_4                                       | 2.70E-12 |
| 2572231764 | t3m_00120 | Locus_type     | CDS                                                   |          |
| 2572231764 | t3m_00120 | Product_name   | ABC-2 family transporter protein                      |          |
| 2572231764 | t3m_00120 | Scaffold       | t3m_contig_70_18_len_82197_read_count_6592593.2       |          |
| 2572231764 | t3m_00120 | Coordinates    | 7229..7897(+)                                         |          |
| 2572231764 | t3m_00120 | DNA_length     | 669bp                                                 |          |
| 2572231764 | t3m_00120 | Protein_length | 222aa                                                 |          |
| 2572231764 | t3m_00120 | GC             |                                                       | 0.71     |
| 2572231764 | t3m_00120 | Transmembrane  | Yes                                                   |          |
| 2572231765 | t3m_00121 | TIGR02537      | archaeal flagellin N-terminal-like domain             | 3.30E-08 |
| 2572231765 | t3m_00121 | Locus_type     | CDS                                                   |          |
| 2572231765 | t3m_00121 | Product_name   | archaeal flagellin N-terminal-like domain             |          |
| 2572231765 | t3m_00121 | Scaffold       | t3m_contig_70_18_len_82197_read_count_6592593.2       |          |
| 2572231765 | t3m_00121 | Coordinates    | 8013..8654(-)                                         |          |
| 2572231765 | t3m_00121 | DNA_length     | 642bp                                                 |          |
| 2572231765 | t3m_00121 | Protein_length | 213aa                                                 |          |
| 2572231765 | t3m_00121 | GC             |                                                       | 0.65     |
| 2572231765 | t3m_00121 | Transmembrane  | Yes                                                   |          |

|            |           |                |                                                 |           |
|------------|-----------|----------------|-------------------------------------------------|-----------|
| 2572231766 | t3m_00122 | COG_category   | [S] Function unknown                            |           |
| 2572231766 | t3m_00122 | COG2246        | Predicted membrane protein                      | 4.00E-05  |
| 2572231766 | t3m_00122 | pfam04138      | GtrA                                            | 8.40E-16  |
| 2572231766 | t3m_00122 | Locus_type     | CDS                                             |           |
| 2572231766 | t3m_00122 | Product_name   | Predicted membrane protein                      |           |
| 2572231766 | t3m_00122 | Scaffold       | t3m_contig_70_18_len_82197_read_count_6592593.2 |           |
| 2572231766 | t3m_00122 | Coordinates    | 8935..9402(-)                                   |           |
| 2572231766 | t3m_00122 | DNA_length     | 468bp                                           |           |
| 2572231766 | t3m_00122 | Protein_length | 155aa                                           |           |
| 2572231766 | t3m_00122 | GC             |                                                 | 0.64      |
| 2572231766 | t3m_00122 | Transmembrane  | Yes                                             |           |
| 2572231767 | t3m_00123 | Locus_type     | CDS                                             |           |
| 2572231767 | t3m_00123 | Product_name   | hypothetical protein                            |           |
| 2572231767 | t3m_00123 | Scaffold       | t3m_contig_70_18_len_82197_read_count_6592593.2 |           |
| 2572231767 | t3m_00123 | Coordinates    | 9866..11257(+)                                  |           |
| 2572231767 | t3m_00123 | DNA_length     | 1392bp                                          |           |
| 2572231767 | t3m_00123 | Protein_length | 463aa                                           |           |
| 2572231767 | t3m_00123 | GC             |                                                 | 0.67      |
| 2572231767 | t3m_00123 | Transmembrane  | Yes                                             |           |
| 2572231768 | t3m_00124 | Locus_type     | CDS                                             |           |
| 2572231768 | t3m_00124 | Product_name   | hypothetical protein                            |           |
| 2572231768 | t3m_00124 | Scaffold       | t3m_contig_70_18_len_82197_read_count_6592593.2 |           |
| 2572231768 | t3m_00124 | Coordinates    | 11355..11957(+)                                 |           |
| 2572231768 | t3m_00124 | DNA_length     | 603bp                                           |           |
| 2572231768 | t3m_00124 | Protein_length | 200aa                                           |           |
| 2572231768 | t3m_00124 | GC             |                                                 | 0.62      |
| 2572231769 | t3m_00125 | IMG_pathway    | 667: Ammonium transport via ammonium channel    |           |
| 2572231769 | t3m_00125 | COG_category   | [P] Inorganic ion transport and metabolism      |           |
| 2572231769 | t3m_00125 | COG0004        | Ammonia permease                                | 1.00E-112 |
| 2572231769 | t3m_00125 | pfam00909      | Ammonium_transp                                 | 1.90E-118 |
| 2572231769 | t3m_00125 | TIGR00836      | ammonium transporter                            | 0.00E+00  |

|            |           |                |                                                            |           |
|------------|-----------|----------------|------------------------------------------------------------|-----------|
| 2572231769 | t3m_00125 | KO:K03320      | ammonium transporter, Amt family                           | 0.00E+00  |
| 2572231769 | t3m_00125 | ITERM:05717    | ammonium transporter (TC 1.A.11)                           |           |
| 2572231769 | t3m_00125 | Locus_type     | CDS                                                        |           |
| 2572231769 | t3m_00125 | Product_name   | ammonium transporter (TC 1.A.11)                           |           |
| 2572231769 | t3m_00125 | Scaffold       | t3m_contig_70_18_len_82197_read_count_6592593.2            |           |
| 2572231769 | t3m_00125 | Coordinates    | 12221..13453(+)                                            |           |
| 2572231769 | t3m_00125 | DNA_length     | 1233bp                                                     |           |
| 2572231769 | t3m_00125 | Protein_length | 410aa                                                      |           |
| 2572231769 | t3m_00125 | GC             |                                                            | 0.64      |
| 2572231769 | t3m_00125 | Transmembrane  | Yes                                                        |           |
| 2572231770 | t3m_00126 | IMG_pathway    | 667: Ammonium transport via ammonium channel               |           |
| 2572231770 | t3m_00126 | COG_category   | [P] Inorganic ion transport and metabolism                 |           |
| 2572231770 | t3m_00126 | COG0004        | Ammonia permease                                           | 4.00E-98  |
| 2572231770 | t3m_00126 | pfam00909      | Ammonium_transp                                            | 8.30E-102 |
| 2572231770 | t3m_00126 | TIGR00836      | ammonium transporter                                       | 4.10E-116 |
| 2572231770 | t3m_00126 | KO:K03320      | ammonium transporter, Amt family                           | 0.00E+00  |
| 2572231770 | t3m_00126 | ITERM:05717    | ammonium transporter (TC 1.A.11)                           |           |
| 2572231770 | t3m_00126 | Locus_type     | CDS                                                        |           |
| 2572231770 | t3m_00126 | Product_name   | ammonium transporter (TC 1.A.11)                           |           |
| 2572231770 | t3m_00126 | Scaffold       | t3m_contig_70_18_len_82197_read_count_6592593.2            |           |
| 2572231770 | t3m_00126 | Coordinates    | 13737..14951(-)                                            |           |
| 2572231770 | t3m_00126 | DNA_length     | 1215bp                                                     |           |
| 2572231770 | t3m_00126 | Protein_length | 404aa                                                      |           |
| 2572231770 | t3m_00126 | GC             |                                                            | 0.63      |
| 2572231770 | t3m_00126 | Transmembrane  | Yes                                                        |           |
| 2572231771 | t3m_00127 | COG_category   | [T] Signal transduction mechanisms                         |           |
| 2572231771 | t3m_00127 | COG0467        | RecA-superfamily ATPases implicated in signal transduction | 2.00E-08  |
| 2572231771 | t3m_00127 | pfam07088      | GvpD                                                       | 2.70E-26  |
| 2572231771 | t3m_00127 | Locus_type     | CDS                                                        |           |
| 2572231771 | t3m_00127 | Product_name   | RecA-superfamily ATPases implicated in signal transduction |           |
| 2572231771 | t3m_00127 | Scaffold       | t3m_contig_70_18_len_82197_read_count_6592593.2            |           |
| 2572231771 | t3m_00127 | Coordinates    | 15392..16885(+)                                            |           |

|            |           |                |                                                                      |          |
|------------|-----------|----------------|----------------------------------------------------------------------|----------|
| 2572231771 | t3m_00127 | DNA_length     | 1494bp                                                               |          |
| 2572231771 | t3m_00127 | Protein_length | 497aa                                                                |          |
| 2572231771 | t3m_00127 | GC             |                                                                      | 0.65     |
| 2572231772 | t3m_00128 | Locus_type     | CDS                                                                  |          |
| 2572231772 | t3m_00128 | Product_name   | hypothetical protein                                                 |          |
| 2572231772 | t3m_00128 | Scaffold       | t3m_contig_70_18_len_82197_read_count_6592593.2                      |          |
| 2572231772 | t3m_00128 | Coordinates    | 17019..17771(-)                                                      |          |
| 2572231772 | t3m_00128 | DNA_length     | 753bp                                                                |          |
| 2572231772 | t3m_00128 | Protein_length | 250aa                                                                |          |
| 2572231772 | t3m_00128 | GC             |                                                                      | 0.67     |
| 2572231772 | t3m_00128 | Transmembrane  | Yes                                                                  |          |
| 2572231773 | t3m_00129 | KEGG_module    | M00254: ABC-2 type transport system                                  |          |
| 2572231773 | t3m_00129 | COG_category   | [V] Defense mechanisms                                               |          |
| 2572231773 | t3m_00129 | COG1131        | ABC-type multidrug transport system, ATPase component                | 4.00E-54 |
| 2572231773 | t3m_00129 | pfam00005      | ABC_tran                                                             | 3.40E-22 |
| 2572231773 | t3m_00129 | KO:K01990      | ABC-2 type transport system ATP-binding protein                      | 0.00E+00 |
| 2572231773 | t3m_00129 | Locus_type     | CDS                                                                  |          |
| 2572231773 | t3m_00129 | Product_name   | ABC-type multidrug transport system, ATPase component                |          |
| 2572231773 | t3m_00129 | Scaffold       | t3m_contig_70_18_len_82197_read_count_6592593.2                      |          |
| 2572231773 | t3m_00129 | Coordinates    | 17768..18697(-)                                                      |          |
| 2572231773 | t3m_00129 | DNA_length     | 930bp                                                                |          |
| 2572231773 | t3m_00129 | Protein_length | 309aa                                                                |          |
| 2572231773 | t3m_00129 | GC             |                                                                      | 0.67     |
| 2572231774 | t3m_00130 | KEGG_module    | M00254: ABC-2 type transport system                                  |          |
| 2572231774 | t3m_00130 | COG_category   | [R] General function prediction only                                 |          |
| 2572231774 | t3m_00130 | COG1277        | ABC-type transport system involved in multi-copper enzyme maturati   | 2.00E-10 |
| 2572231774 | t3m_00130 | pfam12730      | ABC2_membrane_4                                                      | 7.00E-17 |
| 2572231774 | t3m_00130 | KO:K01992      | ABC-2 type transport system permease protein                         | 2.60E-35 |
| 2572231774 | t3m_00130 | Locus_type     | CDS                                                                  |          |
| 2572231774 | t3m_00130 | Product_name   | ABC-type transport system involved in multi-copper enzyme maturation |          |
| 2572231774 | t3m_00130 | Scaffold       | t3m_contig_70_18_len_82197_read_count_6592593.2                      |          |

|            |           |                |                                                                   |          |
|------------|-----------|----------------|-------------------------------------------------------------------|----------|
| 2572231774 | t3m_00130 | Coordinates    | 18701..19588(-)                                                   |          |
| 2572231774 | t3m_00130 | DNA_length     | 888bp                                                             |          |
| 2572231774 | t3m_00130 | Protein_length | 295aa                                                             |          |
| 2572231774 | t3m_00130 | GC             |                                                                   | 0.65     |
| 2572231774 | t3m_00130 | Transmembrane  | Yes                                                               |          |
| 2572231775 | t3m_00131 | Locus_type     | CDS                                                               |          |
| 2572231775 | t3m_00131 | Product_name   | hypothetical protein                                              |          |
| 2572231775 | t3m_00131 | Scaffold       | t3m_contig_70_18_len_82197_read_count_6592593.2                   |          |
| 2572231775 | t3m_00131 | Coordinates    | 19969..20658(+)                                                   |          |
| 2572231775 | t3m_00131 | DNA_length     | 690bp                                                             |          |
| 2572231775 | t3m_00131 | Protein_length | 229aa                                                             |          |
| 2572231775 | t3m_00131 | GC             |                                                                   | 0.65     |
| 2572231775 | t3m_00131 | Transmembrane  | Yes                                                               |          |
| 2572231776 | t3m_00132 | KEGG_module    | M00336: Twin-arginine translocation (Tat) system                  |          |
| 2572231776 | t3m_00132 | pfam02416      | MttA_Hcf106                                                       | 1.10E-11 |
| 2572231776 | t3m_00132 | TIGR01411      | twin arginine-targeting protein translocase, TatA/E family        | 3.10E-19 |
| 2572231776 | t3m_00132 | KO:K03116      | sec-independent protein translocase protein TatA                  | 1.20E-12 |
| 2572231776 | t3m_00132 | Locus_type     | CDS                                                               |          |
| 2572231776 | t3m_00132 | Product_name   | twin arginine-targeting protein translocase, TatA/E family        |          |
| 2572231776 | t3m_00132 | Scaffold       | t3m_contig_70_18_len_82197_read_count_6592593.2                   |          |
| 2572231776 | t3m_00132 | Coordinates    | 20781..20987(+)                                                   |          |
| 2572231776 | t3m_00132 | DNA_length     | 207bp                                                             |          |
| 2572231776 | t3m_00132 | Protein_length | 68aa                                                              |          |
| 2572231776 | t3m_00132 | GC             |                                                                   | 0.63     |
| 2572231777 | t3m_00133 | KEGG_module    | M00336: Twin-arginine translocation (Tat) system                  |          |
| 2572231777 | t3m_00133 | COG_category   | [U] Intracellular trafficking, secretion, and vesicular transport |          |
| 2572231777 | t3m_00133 | COG0805        | Sec-independent protein secretion pathway component TatC          | 2.00E-33 |
| 2572231777 | t3m_00133 | pfam00902      | TatC                                                              | 1.10E-39 |
| 2572231777 | t3m_00133 | TIGR00945      | Twin arginine targeting (Tat) protein translocase TatC            | 6.30E-36 |
| 2572231777 | t3m_00133 | KO:K03118      | sec-independent protein translocase protein TatC                  | 0.00E+00 |
| 2572231777 | t3m_00133 | Locus_type     | CDS                                                               |          |

|            |           |                |                                                           |          |
|------------|-----------|----------------|-----------------------------------------------------------|----------|
| 2572231777 | t3m_00133 | Product_name   | Sec-independent protein secretion pathway component TatC  |          |
| 2572231777 | t3m_00133 | Scaffold       | t3m_contig_70_18_len_82197_read_count_6592593.2           |          |
| 2572231777 | t3m_00133 | Coordinates    | 21091..21927(+)                                           |          |
| 2572231777 | t3m_00133 | DNA_length     | 837bp                                                     |          |
| 2572231777 | t3m_00133 | Protein_length | 278aa                                                     |          |
| 2572231777 | t3m_00133 | GC             |                                                           | 0.64     |
| 2572231777 | t3m_00133 | Transmembrane  | Yes                                                       |          |
|            |           |                |                                                           |          |
| 2572231778 | t3m_00134 | Locus_type     | CDS                                                       |          |
| 2572231778 | t3m_00134 | Product_name   | hypothetical protein                                      |          |
| 2572231778 | t3m_00134 | Scaffold       | t3m_contig_70_18_len_82197_read_count_6592593.2           |          |
| 2572231778 | t3m_00134 | Coordinates    | 21932..22336(+)                                           |          |
| 2572231778 | t3m_00134 | DNA_length     | 405bp                                                     |          |
| 2572231778 | t3m_00134 | Protein_length | 134aa                                                     |          |
| 2572231778 | t3m_00134 | GC             |                                                           | 0.68     |
| 2572231778 | t3m_00134 | Transmembrane  | Yes                                                       |          |
|            |           |                |                                                           |          |
| 2572231779 | t3m_00135 | Locus_type     | CDS                                                       |          |
| 2572231779 | t3m_00135 | Product_name   | hypothetical protein                                      |          |
| 2572231779 | t3m_00135 | Scaffold       | t3m_contig_70_18_len_82197_read_count_6592593.2           |          |
| 2572231779 | t3m_00135 | Coordinates    | 22333..22515(+)                                           |          |
| 2572231779 | t3m_00135 | DNA_length     | 183bp                                                     |          |
| 2572231779 | t3m_00135 | Protein_length | 60aa                                                      |          |
| 2572231779 | t3m_00135 | GC             |                                                           | 0.66     |
| 2572231779 | t3m_00135 | Transmembrane  | Yes                                                       |          |
|            |           |                |                                                           |          |
| 2572231780 | t3m_00136 | COG_category   | [C] Energy production and conversion                      |          |
| 2572231780 | t3m_00136 | COG0723        | Rieske Fe-S protein                                       | 7.00E-19 |
| 2572231780 | t3m_00136 | pfam00355      | Rieske                                                    | 1.90E-14 |
| 2572231780 | t3m_00136 | TIGR02694      | arsenite oxidase, small subunit                           | 6.10E-21 |
| 2572231780 | t3m_00136 | TIGR01409      | Tat (twin-arginine translocation) pathway signal sequence | 3.30E-08 |
| 2572231780 | t3m_00136 | Locus_type     | CDS                                                       |          |
| 2572231780 | t3m_00136 | Product_name   | Rieske Fe-S protein                                       |          |
| 2572231780 | t3m_00136 | Scaffold       | t3m_contig_70_18_len_82197_read_count_6592593.2           |          |



|            |           |                |                                                                       |          |
|------------|-----------|----------------|-----------------------------------------------------------------------|----------|
| 2572231780 | t3m_00136 | Coordinates    | 22512..23345(+)                                                       |          |
| 2572231780 | t3m_00136 | DNA_length     | 834bp                                                                 |          |
| 2572231780 | t3m_00136 | Protein_length | 277aa                                                                 |          |
| 2572231780 | t3m_00136 | GC             |                                                                       | 0.67     |
| 2572231780 | t3m_00136 | Transmembrane  | Yes                                                                   |          |
| 2572231781 | t3m_00137 | COG_category   | [C] Energy production and conversion                                  |          |
| 2572231781 | t3m_00137 | COG1290        | Cytochrome b subunit of the bc complex                                | 5.00E-44 |
| 2572231781 | t3m_00137 | pfam13631      | Cytochrom_B_N_2                                                       | 1.70E-29 |
| 2572231781 | t3m_00137 | pfam00032      | Cytochrom_B_C                                                         | 1.40E-04 |
| 2572231781 | t3m_00137 | Locus_type     | CDS                                                                   |          |
| 2572231781 | t3m_00137 | Product_name   | Cytochrome b subunit of the bc complex                                |          |
| 2572231781 | t3m_00137 | Scaffold       | t3m_contig_70_18_len_82197_read_count_6592593.2                       |          |
| 2572231781 | t3m_00137 | Coordinates    | 23354..24874(+)                                                       |          |
| 2572231781 | t3m_00137 | DNA_length     | 1521bp                                                                |          |
| 2572231781 | t3m_00137 | Protein_length | 506aa                                                                 |          |
| 2572231781 | t3m_00137 | GC             |                                                                       | 0.67     |
| 2572231781 | t3m_00137 | Transmembrane  | Yes                                                                   |          |
| 2572231782 | t3m_00138 | COG_category   | [P] Inorganic ion transport and metabolism                            |          |
| 2572231782 | t3m_00138 | COG_category   | [E] Amino acid transport and metabolism                               |          |
| 2572231782 | t3m_00138 | COG1173        | ABC-type dipeptide/oligopeptide/nickel transport systems, permease co | 2.00E-32 |
| 2572231782 | t3m_00138 | pfam05317      | Thermopsin                                                            | 3.80E-37 |
| 2572231782 | t3m_00138 | pfam00528      | BPD_transp_1                                                          | 7.10E-13 |
| 2572231782 | t3m_00138 | Locus_type     | CDS                                                                   |          |
| 2572231782 | t3m_00138 | Product_name   | ABC-type dipeptide/oligopeptide/nickel transport systems, permease co |          |
| 2572231782 | t3m_00138 | Scaffold       | t3m_contig_70_18_len_82197_read_count_6592593.2                       |          |
| 2572231782 | t3m_00138 | Coordinates    | 24975..28829(-)                                                       |          |
| 2572231782 | t3m_00138 | DNA_length     | 3855bp                                                                |          |
| 2572231782 | t3m_00138 | Protein_length | 1284aa                                                                |          |
| 2572231782 | t3m_00138 | GC             |                                                                       | 0.66     |
| 2572231782 | t3m_00138 | Transmembrane  | Yes                                                                   |          |
| 2572231783 | t3m_00139 | COG_category   | [E] Amino acid transport and metabolism                               |          |

|            |           |                |                                                                      |                                                                       |          |
|------------|-----------|----------------|----------------------------------------------------------------------|-----------------------------------------------------------------------|----------|
| 2572231783 | t3m_00139 | COG_category   | [P] Inorganic ion transport and metabolism                           |                                                                       |          |
| 2572231783 | t3m_00139 | COG0601        | ABC-type dipeptide/oligopeptide/nickel transport systems, permease c |                                                                       | 2.00E-19 |
| 2572231783 | t3m_00139 | pfam00528      | BPD_transp_1                                                         |                                                                       | 5.10E-11 |
| 2572231783 | t3m_00139 | Locus_type     |                                                                      | CDS                                                                   |          |
| 2572231783 | t3m_00139 | Product_name   |                                                                      | ABC-type dipeptide/oligopeptide/nickel transport systems, permease co |          |
| 2572231783 | t3m_00139 | Scaffold       |                                                                      | t3m_contig_70_18_len_82197_read_count_6592593.2                       |          |
| 2572231783 | t3m_00139 | Coordinates    |                                                                      | 28853..29869(-)                                                       |          |
| 2572231783 | t3m_00139 | DNA_length     |                                                                      | 1017bp                                                                |          |
| 2572231783 | t3m_00139 | Protein_length |                                                                      | 338aa                                                                 |          |
| 2572231783 | t3m_00139 | GC             |                                                                      |                                                                       | 0.65     |
| 2572231783 | t3m_00139 | Transmembrane  |                                                                      | Yes                                                                   |          |
| 2572231784 | t3m_00140 | Locus_type     |                                                                      | CDS                                                                   |          |
| 2572231784 | t3m_00140 | Product_name   |                                                                      | hypothetical protein                                                  |          |
| 2572231784 | t3m_00140 | Scaffold       |                                                                      | t3m_contig_70_18_len_82197_read_count_6592593.2                       |          |
| 2572231784 | t3m_00140 | Coordinates    |                                                                      | 30079..30309(+)                                                       |          |
| 2572231784 | t3m_00140 | DNA_length     |                                                                      | 231bp                                                                 |          |
| 2572231784 | t3m_00140 | Protein_length |                                                                      | 76aa                                                                  |          |
| 2572231784 | t3m_00140 | GC             |                                                                      |                                                                       | 0.68     |
| 2572231785 | t3m_00141 | KEGG_module    | M00288: RPA complex                                                  |                                                                       |          |
| 2572231785 | t3m_00141 | pfam01336      | tRNA_anti-codon                                                      |                                                                       | 2.10E-10 |
| 2572231785 | t3m_00141 | KO:K07466      | replication factor A1                                                |                                                                       | 9.30E-11 |
| 2572231785 | t3m_00141 | Locus_type     |                                                                      | CDS                                                                   |          |
| 2572231785 | t3m_00141 | Product_name   |                                                                      | OB-fold nucleic acid binding domain                                   |          |
| 2572231785 | t3m_00141 | Scaffold       |                                                                      | t3m_contig_70_18_len_82197_read_count_6592593.2                       |          |
| 2572231785 | t3m_00141 | Coordinates    |                                                                      | 30399..30686(-)                                                       |          |
| 2572231785 | t3m_00141 | DNA_length     |                                                                      | 288bp                                                                 |          |
| 2572231785 | t3m_00141 | Protein_length |                                                                      | 95aa                                                                  |          |
| 2572231785 | t3m_00141 | GC             |                                                                      |                                                                       | 0.62     |
| 2572231786 | t3m_00142 | Locus_type     |                                                                      | CDS                                                                   |          |
| 2572231786 | t3m_00142 | Product_name   |                                                                      | hypothetical protein                                                  |          |
| 2572231786 | t3m_00142 | Scaffold       |                                                                      | t3m_contig_70_18_len_82197_read_count_6592593.2                       |          |

|            |           |                |                                                 |          |
|------------|-----------|----------------|-------------------------------------------------|----------|
| 2572231786 | t3m_00142 | Coordinates    | 30753..31178(-)                                 |          |
| 2572231786 | t3m_00142 | DNA_length     | 426bp                                           |          |
| 2572231786 | t3m_00142 | Protein_length | 141aa                                           |          |
| 2572231786 | t3m_00142 | GC             |                                                 | 0.67     |
| 2572231787 | t3m_00143 | Locus_type     | CDS                                             |          |
| 2572231787 | t3m_00143 | Product_name   | hypothetical protein                            |          |
| 2572231787 | t3m_00143 | Scaffold       | t3m_contig_70_18_len_82197_read_count_6592593.2 |          |
| 2572231787 | t3m_00143 | Coordinates    | 31177..31335(+)                                 |          |
| 2572231787 | t3m_00143 | DNA_length     | 159bp                                           |          |
| 2572231787 | t3m_00143 | Protein_length | 52aa                                            |          |
| 2572231787 | t3m_00143 | GC             |                                                 | 0.67     |
| 2572231788 | t3m_00144 | Locus_type     | CDS                                             |          |
| 2572231788 | t3m_00144 | Product_name   | hypothetical protein                            |          |
| 2572231788 | t3m_00144 | Scaffold       | t3m_contig_70_18_len_82197_read_count_6592593.2 |          |
| 2572231788 | t3m_00144 | Coordinates    | 31373..31924(-)                                 |          |
| 2572231788 | t3m_00144 | DNA_length     | 552bp                                           |          |
| 2572231788 | t3m_00144 | Protein_length | 183aa                                           |          |
| 2572231788 | t3m_00144 | GC             |                                                 | 0.64     |
| 2572231788 | t3m_00144 | Transmembrane  | Yes                                             |          |
| 2572231789 | t3m_00145 | Locus_type     | CDS                                             |          |
| 2572231789 | t3m_00145 | Product_name   | hypothetical protein                            |          |
| 2572231789 | t3m_00145 | Scaffold       | t3m_contig_70_18_len_82197_read_count_6592593.2 |          |
| 2572231789 | t3m_00145 | Coordinates    | 32088..33335(-)                                 |          |
| 2572231789 | t3m_00145 | DNA_length     | 1248bp                                          |          |
| 2572231789 | t3m_00145 | Protein_length | 415aa                                           |          |
| 2572231789 | t3m_00145 | GC             |                                                 | 0.66     |
| 2572231789 | t3m_00145 | Transmembrane  | Yes                                             |          |
| 2572231790 | t3m_00146 | pfam00717      | Peptidase_S24                                   | 7.60E-06 |
| 2572231790 | t3m_00146 | TIGR02228      | signal peptidase I, archaeal type               | 1.80E-27 |
| 2572231790 | t3m_00146 | Locus_type     | CDS                                             |          |

|            |           |                |                                                 |          |
|------------|-----------|----------------|-------------------------------------------------|----------|
| 2572231790 | t3m_00146 | Product_name   | signal peptidase I, archaeal type               |          |
| 2572231790 | t3m_00146 | Scaffold       | t3m_contig_70_18_len_82197_read_count_6592593.2 |          |
| 2572231790 | t3m_00146 | Coordinates    | 33332..34612(-)                                 |          |
| 2572231790 | t3m_00146 | DNA_length     | 1281bp                                          |          |
| 2572231790 | t3m_00146 | Protein_length | 426aa                                           |          |
| 2572231790 | t3m_00146 | GC             |                                                 | 0.66     |
| 2572231790 | t3m_00146 | Transmembrane  | Yes                                             |          |
|            |           |                |                                                 |          |
| 2572231791 | t3m_00147 | COG_category   | [K] Transcription                               |          |
| 2572231791 | t3m_00147 | COG3432        | Predicted transcriptional regulator             | 4.00E-06 |
| 2572231791 | t3m_00147 | pfam14947      | HTH_45                                          | 3.10E-11 |
| 2572231791 | t3m_00147 | Locus_type     | CDS                                             |          |
| 2572231791 | t3m_00147 | Product_name   | Predicted transcriptional regulator             |          |
| 2572231791 | t3m_00147 | Scaffold       | t3m_contig_70_18_len_82197_read_count_6592593.2 |          |
| 2572231791 | t3m_00147 | Coordinates    | 34693..35271(-)                                 |          |
| 2572231791 | t3m_00147 | DNA_length     | 579bp                                           |          |
| 2572231791 | t3m_00147 | Protein_length | 192aa                                           |          |
| 2572231791 | t3m_00147 | GC             |                                                 | 0.67     |
|            |           |                |                                                 |          |
| 2572231792 | t3m_00148 | COG_category   | [M] Cell wall/membrane/envelope biogenesis      |          |
| 2572231792 | t3m_00148 | COG1247        | Sortase and related acyltransferases            | 2.00E-06 |
| 2572231792 | t3m_00148 | pfam00583      | Acetyltransf_1                                  | 2.80E-08 |
| 2572231792 | t3m_00148 | Locus_type     | CDS                                             |          |
| 2572231792 | t3m_00148 | Product_name   | Sortase and related acyltransferases            |          |
| 2572231792 | t3m_00148 | Scaffold       | t3m_contig_70_18_len_82197_read_count_6592593.2 |          |
| 2572231792 | t3m_00148 | Coordinates    | 35518..36267(+)                                 |          |
| 2572231792 | t3m_00148 | DNA_length     | 750bp                                           |          |
| 2572231792 | t3m_00148 | Protein_length | 249aa                                           |          |
| 2572231792 | t3m_00148 | GC             |                                                 | 0.69     |
|            |           |                |                                                 |          |
| 2572231793 | t3m_00149 | Locus_type     | CDS                                             |          |
| 2572231793 | t3m_00149 | Product_name   | hypothetical protein                            |          |
| 2572231793 | t3m_00149 | Scaffold       | t3m_contig_70_18_len_82197_read_count_6592593.2 |          |
| 2572231793 | t3m_00149 | Coordinates    | 36286..37335(-)                                 |          |

|            |           |                |                                                 |      |
|------------|-----------|----------------|-------------------------------------------------|------|
| 2572231793 | t3m_00149 | DNA_length     | 1050bp                                          |      |
| 2572231793 | t3m_00149 | Protein_length | 349aa                                           |      |
| 2572231793 | t3m_00149 | GC             |                                                 | 0.63 |
| 2572231793 | t3m_00149 | Signal_peptide | Yes                                             |      |
| 2572231793 | t3m_00149 | Transmembrane  | Yes                                             |      |
|            |           |                |                                                 |      |
| 2572231794 | t3m_00150 | Locus_type     | CDS                                             |      |
| 2572231794 | t3m_00150 | Product_name   | hypothetical protein                            |      |
| 2572231794 | t3m_00150 | Scaffold       | t3m_contig_70_18_len_82197_read_count_6592593.2 |      |
| 2572231794 | t3m_00150 | Coordinates    | 37332..38861(-)                                 |      |
| 2572231794 | t3m_00150 | DNA_length     | 1530bp                                          |      |
| 2572231794 | t3m_00150 | Protein_length | 509aa                                           |      |
| 2572231794 | t3m_00150 | GC             |                                                 | 0.66 |
|            |           |                |                                                 |      |
| 2572231795 | t3m_00151 | Locus_type     | CDS                                             |      |
| 2572231795 | t3m_00151 | Product_name   | hypothetical protein                            |      |
| 2572231795 | t3m_00151 | Scaffold       | t3m_contig_70_18_len_82197_read_count_6592593.2 |      |
| 2572231795 | t3m_00151 | Coordinates    | 38863..40101(-)                                 |      |
| 2572231795 | t3m_00151 | DNA_length     | 1239bp                                          |      |
| 2572231795 | t3m_00151 | Protein_length | 412aa                                           |      |
| 2572231795 | t3m_00151 | GC             |                                                 | 0.66 |
|            |           |                |                                                 |      |
| 2572231796 | t3m_00152 | Locus_type     | CDS                                             |      |
| 2572231796 | t3m_00152 | Product_name   | hypothetical protein                            |      |
| 2572231796 | t3m_00152 | Scaffold       | t3m_contig_70_18_len_82197_read_count_6592593.2 |      |
| 2572231796 | t3m_00152 | Coordinates    | 40291..40560(+)                                 |      |
| 2572231796 | t3m_00152 | DNA_length     | 270bp                                           |      |
| 2572231796 | t3m_00152 | Protein_length | 89aa                                            |      |
| 2572231796 | t3m_00152 | GC             |                                                 | 0.64 |
|            |           |                |                                                 |      |
| 2572231797 | t3m_00153 | Locus_type     | CDS                                             |      |
| 2572231797 | t3m_00153 | Product_name   | hypothetical protein                            |      |
| 2572231797 | t3m_00153 | Scaffold       | t3m_contig_70_18_len_82197_read_count_6592593.2 |      |
| 2572231797 | t3m_00153 | Coordinates    | 40672..41676(-)                                 |      |

|            |           |                |                 |                                                 |          |
|------------|-----------|----------------|-----------------|-------------------------------------------------|----------|
| 2572231797 | t3m_00153 | DNA_length     |                 | 1005bp                                          |          |
| 2572231797 | t3m_00153 | Protein_length |                 | 334aa                                           |          |
| 2572231797 | t3m_00153 | GC             |                 |                                                 | 0.66     |
| 2572231797 | t3m_00153 | Transmembrane  |                 | Yes                                             |          |
|            |           |                |                 |                                                 |          |
| 2572231798 | t3m_00154 | Locus_type     |                 | CDS                                             |          |
| 2572231798 | t3m_00154 | Product_name   |                 | hypothetical protein                            |          |
| 2572231798 | t3m_00154 | Scaffold       |                 | t3m_contig_70_18_len_82197_read_count_6592593.2 |          |
| 2572231798 | t3m_00154 | Coordinates    |                 | 41914..42621(+)                                 |          |
| 2572231798 | t3m_00154 | DNA_length     |                 | 708bp                                           |          |
| 2572231798 | t3m_00154 | Protein_length |                 | 235aa                                           |          |
| 2572231798 | t3m_00154 | GC             |                 |                                                 | 0.66     |
|            |           |                |                 |                                                 |          |
| 2572231799 | t3m_00155 | pfam13632      | Glyco_trans_2_3 |                                                 | 5.30E-19 |
| 2572231799 | t3m_00155 | Locus_type     |                 | CDS                                             |          |
| 2572231799 | t3m_00155 | Product_name   |                 | Glycosyl transferase family group 2             |          |
| 2572231799 | t3m_00155 | Scaffold       |                 | t3m_contig_70_18_len_82197_read_count_6592593.2 |          |
| 2572231799 | t3m_00155 | Coordinates    |                 | 42618..43781(-)                                 |          |
| 2572231799 | t3m_00155 | DNA_length     |                 | 1164bp                                          |          |
| 2572231799 | t3m_00155 | Protein_length |                 | 387aa                                           |          |
| 2572231799 | t3m_00155 | GC             |                 |                                                 | 0.67     |
| 2572231799 | t3m_00155 | Transmembrane  |                 | Yes                                             |          |
|            |           |                |                 |                                                 |          |
| 2572231800 | t3m_00156 | Locus_type     |                 | CDS                                             |          |
| 2572231800 | t3m_00156 | Product_name   |                 | hypothetical protein                            |          |
| 2572231800 | t3m_00156 | Scaffold       |                 | t3m_contig_70_18_len_82197_read_count_6592593.2 |          |
| 2572231800 | t3m_00156 | Coordinates    |                 | 43778..44719(-)                                 |          |
| 2572231800 | t3m_00156 | DNA_length     |                 | 942bp                                           |          |
| 2572231800 | t3m_00156 | Protein_length |                 | 313aa                                           |          |
| 2572231800 | t3m_00156 | GC             |                 |                                                 | 0.7      |
| 2572231800 | t3m_00156 | Transmembrane  |                 | Yes                                             |          |
|            |           |                |                 |                                                 |          |
| 2572231801 | t3m_00157 | Locus_type     |                 | CDS                                             |          |
| 2572231801 | t3m_00157 | Product_name   |                 | hypothetical protein                            |          |

|            |           |                |                                                                             |                                                                          |          |
|------------|-----------|----------------|-----------------------------------------------------------------------------|--------------------------------------------------------------------------|----------|
| 2572231801 | t3m_00157 | Scaffold       |                                                                             | t3m_contig_70_18_len_82197_read_count_6592593.2                          |          |
| 2572231801 | t3m_00157 | Coordinates    |                                                                             | 44791..45018(-)                                                          |          |
| 2572231801 | t3m_00157 | DNA_length     |                                                                             | 228bp                                                                    |          |
| 2572231801 | t3m_00157 | Protein_length |                                                                             | 75aa                                                                     |          |
| 2572231801 | t3m_00157 | GC             |                                                                             |                                                                          | 0.67     |
| 2572231801 | t3m_00157 | Transmembrane  |                                                                             | Yes                                                                      |          |
|            |           |                |                                                                             |                                                                          |          |
| 2572231802 | t3m_00158 | Locus_type     |                                                                             | CDS                                                                      |          |
| 2572231802 | t3m_00158 | Product_name   |                                                                             | hypothetical protein                                                     |          |
| 2572231802 | t3m_00158 | Scaffold       |                                                                             | t3m_contig_70_18_len_82197_read_count_6592593.2                          |          |
| 2572231802 | t3m_00158 | Coordinates    |                                                                             | 45015..45728(-)                                                          |          |
| 2572231802 | t3m_00158 | DNA_length     |                                                                             | 714bp                                                                    |          |
| 2572231802 | t3m_00158 | Protein_length |                                                                             | 237aa                                                                    |          |
| 2572231802 | t3m_00158 | GC             |                                                                             |                                                                          | 0.69     |
| 2572231802 | t3m_00158 | Signal_peptide |                                                                             | Yes                                                                      |          |
| 2572231802 | t3m_00158 | Transmembrane  |                                                                             | Yes                                                                      |          |
|            |           |                |                                                                             |                                                                          |          |
| 2572231803 | t3m_00159 | pfam05763      | DUF835                                                                      |                                                                          | 2.40E-07 |
| 2572231803 | t3m_00159 | pfam08264      | Anticodon_1                                                                 |                                                                          | 4.80E-14 |
| 2572231803 | t3m_00159 | pfam00133      | tRNA-synt_1                                                                 |                                                                          | 6.20E-25 |
| 2572231803 | t3m_00159 | Locus_type     |                                                                             | CDS                                                                      |          |
| 2572231803 | t3m_00159 | Product_name   |                                                                             | tRNA synthetases class I (I, L, M and V)/Protein of unknown function (DL |          |
| 2572231803 | t3m_00159 | Scaffold       |                                                                             | t3m_contig_70_18_len_82197_read_count_6592593.2                          |          |
| 2572231803 | t3m_00159 | Coordinates    |                                                                             | 45809..50614(-)                                                          |          |
| 2572231803 | t3m_00159 | DNA_length     |                                                                             | 4806bp                                                                   |          |
| 2572231803 | t3m_00159 | Protein_length |                                                                             | 1601aa                                                                   |          |
| 2572231803 | t3m_00159 | GC             |                                                                             |                                                                          | 0.71     |
|            |           |                |                                                                             |                                                                          |          |
| 2572231804 | t3m_00160 | IMG_pathway    | 854: Hypusine synthesis                                                     |                                                                          |          |
| 2572231804 | t3m_00160 | COG_category   | [J] Translation, ribosomal structure and biogenesis                         |                                                                          |          |
| 2572231804 | t3m_00160 | COG0231        | Translation elongation factor P (EF-P)/translation initiation factor 5A (eI |                                                                          | 6.00E-27 |
| 2572231804 | t3m_00160 | pfam01287      | eIF-5a                                                                      |                                                                          | 9.80E-12 |
| 2572231804 | t3m_00160 | pfam08207      | EFP_N                                                                       |                                                                          | 2.00E-04 |
| 2572231804 | t3m_00160 | TIGR00037      | translation elongation factor IF5A                                          |                                                                          | 5.90E-51 |

|            |           |                |                                                     |          |
|------------|-----------|----------------|-----------------------------------------------------|----------|
| 2572231804 | t3m_00160 | KO:K03263      | translation initiation factor 5A                    | 1.20E-42 |
| 2572231804 | t3m_00160 | ITERM:01965    | translation initiation factor 5A precursor (eIF-5A) |          |
| 2572231804 | t3m_00160 | Locus_type     | CDS                                                 |          |
| 2572231804 | t3m_00160 | Product_name   | translation initiation factor 5A precursor (eIF-5A) |          |
| 2572231804 | t3m_00160 | Scaffold       | t3m_contig_70_18_len_82197_read_count_6592593.2     |          |
| 2572231804 | t3m_00160 | Coordinates    | 50756..51142(+)                                     |          |
| 2572231804 | t3m_00160 | DNA_length     | 387bp                                               |          |
| 2572231804 | t3m_00160 | Protein_length | 128aa                                               |          |
| 2572231804 | t3m_00160 | GC             |                                                     | 0.65     |
|            |           |                |                                                     |          |
| 2572231805 | t3m_00161 | Locus_type     | CDS                                                 |          |
| 2572231805 | t3m_00161 | Product_name   | hypothetical protein                                |          |
| 2572231805 | t3m_00161 | Scaffold       | t3m_contig_70_18_len_82197_read_count_6592593.2     |          |
| 2572231805 | t3m_00161 | Coordinates    | 51296..55777(+)                                     |          |
| 2572231805 | t3m_00161 | DNA_length     | 4482bp                                              |          |
| 2572231805 | t3m_00161 | Protein_length | 1493aa                                              |          |
| 2572231805 | t3m_00161 | GC             |                                                     | 0.71     |
|            |           |                |                                                     |          |
| 2572231806 | t3m_00162 | Locus_type     | CDS                                                 |          |
| 2572231806 | t3m_00162 | Product_name   | hypothetical protein                                |          |
| 2572231806 | t3m_00162 | Scaffold       | t3m_contig_70_18_len_82197_read_count_6592593.2     |          |
| 2572231806 | t3m_00162 | Coordinates    | 55782..56240(-)                                     |          |
| 2572231806 | t3m_00162 | DNA_length     | 459bp                                               |          |
| 2572231806 | t3m_00162 | Protein_length | 152aa                                               |          |
| 2572231806 | t3m_00162 | GC             |                                                     | 0.68     |
|            |           |                |                                                     |          |
| 2572231807 | t3m_00163 | COG_category   | [S] Function unknown                                |          |
| 2572231807 | t3m_00163 | COG0393        | Uncharacterized conserved protein                   | 1.00E-29 |
| 2572231807 | t3m_00163 | pfam01906      | YbjQ_1                                              | 1.50E-32 |
| 2572231807 | t3m_00163 | Locus_type     | CDS                                                 |          |
| 2572231807 | t3m_00163 | Product_name   | Uncharacterized conserved protein                   |          |
| 2572231807 | t3m_00163 | Scaffold       | t3m_contig_70_18_len_82197_read_count_6592593.2     |          |
| 2572231807 | t3m_00163 | Coordinates    | 56324..56728(+)                                     |          |
| 2572231807 | t3m_00163 | DNA_length     | 405bp                                               |          |



|            |           |                |               |                                                 |          |
|------------|-----------|----------------|---------------|-------------------------------------------------|----------|
| 2572231807 | t3m_00163 | Protein_length |               | 134aa                                           |          |
| 2572231807 | t3m_00163 | GC             |               |                                                 | 0.68     |
| 2572231808 | t3m_00164 | Locus_type     |               | tRNA                                            |          |
| 2572231808 | t3m_00164 | Product_name   |               | tRNA_Glu_CTC                                    |          |
| 2572231808 | t3m_00164 | Scaffold       |               | t3m_contig_70_18_len_82197_read_count_6592593.2 |          |
| 2572231808 | t3m_00164 | Coordinates    |               | 56780..56852(+)                                 |          |
| 2572231808 | t3m_00164 | DNA_length     |               | 73bp                                            |          |
| 2572231808 | t3m_00164 | GC             |               |                                                 | 0.62     |
| 2572231809 | t3m_00165 | pfam13248      | zf-ribbon_3   |                                                 | 2.70E-07 |
| 2572231809 | t3m_00165 | Locus_type     |               | CDS                                             |          |
| 2572231809 | t3m_00165 | Product_name   |               | zinc-ribbon domain                              |          |
| 2572231809 | t3m_00165 | Scaffold       |               | t3m_contig_70_18_len_82197_read_count_6592593.2 |          |
| 2572231809 | t3m_00165 | Coordinates    |               | 56967..57608(-)                                 |          |
| 2572231809 | t3m_00165 | DNA_length     |               | 642bp                                           |          |
| 2572231809 | t3m_00165 | Protein_length |               | 213aa                                           |          |
| 2572231809 | t3m_00165 | GC             |               |                                                 | 0.67     |
| 2572231809 | t3m_00165 | Transmembrane  |               | Yes                                             |          |
| 2572231810 | t3m_00166 | pfam12695      | Abhydrolase_5 |                                                 | 5.40E-14 |
| 2572231810 | t3m_00166 | Locus_type     |               | CDS                                             |          |
| 2572231810 | t3m_00166 | Product_name   |               | Alpha/beta hydrolase family                     |          |
| 2572231810 | t3m_00166 | Scaffold       |               | t3m_contig_70_18_len_82197_read_count_6592593.2 |          |
| 2572231810 | t3m_00166 | Coordinates    |               | 58176..58694(-)                                 |          |
| 2572231810 | t3m_00166 | DNA_length     |               | 519bp                                           |          |
| 2572231810 | t3m_00166 | Protein_length |               | 172aa                                           |          |
| 2572231810 | t3m_00166 | GC             |               |                                                 | 0.68     |
| 2572231811 | t3m_00167 | Locus_type     |               | CDS                                             |          |
| 2572231811 | t3m_00167 | Product_name   |               | hypothetical protein                            |          |
| 2572231811 | t3m_00167 | Scaffold       |               | t3m_contig_70_18_len_82197_read_count_6592593.2 |          |
| 2572231811 | t3m_00167 | Coordinates    |               | 58917..59726(-)                                 |          |
| 2572231811 | t3m_00167 | DNA_length     |               | 810bp                                           |          |

|            |           |                |                                                   |          |
|------------|-----------|----------------|---------------------------------------------------|----------|
| 2572231811 | t3m_00167 | Protein_length | 269aa                                             |          |
| 2572231811 | t3m_00167 | GC             |                                                   | 0.67     |
| 2572231811 | t3m_00167 | Transmembrane  | Yes                                               |          |
| 2572231812 | t3m_00168 | pfam08241      | Methyltransf_11                                   | 2.40E-20 |
| 2572231812 | t3m_00168 | Locus_type     | CDS                                               |          |
| 2572231812 | t3m_00168 | Product_name   | Methyltransferase domain                          |          |
| 2572231812 | t3m_00168 | Scaffold       | t3m_contig_70_18_len_82197_read_count_6592593.2   |          |
| 2572231812 | t3m_00168 | Coordinates    | 60026..60625(+)                                   |          |
| 2572231812 | t3m_00168 | DNA_length     | 600bp                                             |          |
| 2572231812 | t3m_00168 | Protein_length | 199aa                                             |          |
| 2572231812 | t3m_00168 | GC             |                                                   | 0.68     |
| 2572231813 | t3m_00169 | KEGG_module    | M00021: Cysteine biosynthesis, serine => cysteine |          |
| 2572231813 | t3m_00169 | Metacyc        | PWY-6936: seleno-amino acid biosynthesis          |          |
| 2572231813 | t3m_00169 | Metacyc        | CYSTSYN-PWY: cysteine biosynthesis I              |          |
| 2572231813 | t3m_00169 | COG_category   | [E] Amino acid transport and metabolism           |          |
| 2572231813 | t3m_00169 | COG0031        | Cysteine synthase                                 | 5.00E-87 |
| 2572231813 | t3m_00169 | pfam00291      | PALP                                              | 2.10E-53 |
| 2572231813 | t3m_00169 | EC:2.5.1.47    | Cysteine synthase.                                |          |
| 2572231813 | t3m_00169 | KO:K01738      | cysteine synthase A [EC:2.5.1.47]                 | 0.00E+00 |
| 2572231813 | t3m_00169 | Locus_type     | CDS                                               |          |
| 2572231813 | t3m_00169 | Product_name   | Cysteine synthase                                 |          |
| 2572231813 | t3m_00169 | Scaffold       | t3m_contig_70_18_len_82197_read_count_6592593.2   |          |
| 2572231813 | t3m_00169 | Coordinates    | 60726..61670(-)                                   |          |
| 2572231813 | t3m_00169 | DNA_length     | 945bp                                             |          |
| 2572231813 | t3m_00169 | Protein_length | 314aa                                             |          |
| 2572231813 | t3m_00169 | GC             |                                                   | 0.65     |
| 2572231814 | t3m_00170 | COG_category   | [S] Function unknown                              |          |
| 2572231814 | t3m_00170 | COG1650        | Uncharacterized protein conserved in archaea      | 2.00E-29 |
| 2572231814 | t3m_00170 | pfam04414      | tRNA_deacylase                                    | 1.70E-40 |
| 2572231814 | t3m_00170 | KO:K09716      | hypothetical protein                              | 1.40E-30 |
| 2572231814 | t3m_00170 | Locus_type     | CDS                                               |          |

|            |           |                |                                                 |          |
|------------|-----------|----------------|-------------------------------------------------|----------|
| 2572231814 | t3m_00170 | Product_name   | Uncharacterized protein conserved in archaea    |          |
| 2572231814 | t3m_00170 | Scaffold       | t3m_contig_70_18_len_82197_read_count_6592593.2 |          |
| 2572231814 | t3m_00170 | Coordinates    | 61800..62666(+)                                 |          |
| 2572231814 | t3m_00170 | DNA_length     | 867bp                                           |          |
| 2572231814 | t3m_00170 | Protein_length | 288aa                                           |          |
| 2572231814 | t3m_00170 | GC             |                                                 | 0.69     |
|            |           |                |                                                 |          |
| 2572231815 | t3m_00171 | Locus_type     | CDS                                             |          |
| 2572231815 | t3m_00171 | Product_name   | hypothetical protein                            |          |
| 2572231815 | t3m_00171 | Scaffold       | t3m_contig_70_18_len_82197_read_count_6592593.2 |          |
| 2572231815 | t3m_00171 | Coordinates    | 62632..62889(-)                                 |          |
| 2572231815 | t3m_00171 | DNA_length     | 258bp                                           |          |
| 2572231815 | t3m_00171 | Protein_length | 85aa                                            |          |
| 2572231815 | t3m_00171 | GC             |                                                 | 0.63     |
|            |           |                |                                                 |          |
| 2572231816 | t3m_00172 | Locus_type     | CDS                                             |          |
| 2572231816 | t3m_00172 | Product_name   | hypothetical protein                            |          |
| 2572231816 | t3m_00172 | Scaffold       | t3m_contig_70_18_len_82197_read_count_6592593.2 |          |
| 2572231816 | t3m_00172 | Coordinates    | 63084..63971(-)                                 |          |
| 2572231816 | t3m_00172 | DNA_length     | 888bp                                           |          |
| 2572231816 | t3m_00172 | Protein_length | 295aa                                           |          |
| 2572231816 | t3m_00172 | GC             |                                                 | 0.64     |
|            |           |                |                                                 |          |
| 2572231817 | t3m_00173 | COG_category   | [R] General function prediction only            |          |
| 2572231817 | t3m_00173 | COG0612        | Predicted Zn-dependent peptidases               | 9.00E-46 |
| 2572231817 | t3m_00173 | pfam00675      | Peptidase_M16                                   | 9.80E-06 |
| 2572231817 | t3m_00173 | pfam05193      | Peptidase_M16_C                                 | 6.20E-18 |
| 2572231817 | t3m_00173 | Locus_type     | CDS                                             |          |
| 2572231817 | t3m_00173 | Product_name   | Predicted Zn-dependent peptidases               |          |
| 2572231817 | t3m_00173 | Scaffold       | t3m_contig_70_18_len_82197_read_count_6592593.2 |          |
| 2572231817 | t3m_00173 | Coordinates    | 64128..65399(-)                                 |          |
| 2572231817 | t3m_00173 | DNA_length     | 1272bp                                          |          |
| 2572231817 | t3m_00173 | Protein_length | 423aa                                           |          |
| 2572231817 | t3m_00173 | GC             |                                                 | 0.7      |

|            |           |                |                                                                        |          |
|------------|-----------|----------------|------------------------------------------------------------------------|----------|
| 2572231818 | t3m_00174 | COG_category   | [R] General function prediction only                                   |          |
| 2572231818 | t3m_00174 | COG0612        | Predicted Zn-dependent peptidases                                      | 2.00E-64 |
| 2572231818 | t3m_00174 | pfam05193      | Peptidase_M16_C                                                        | 1.80E-21 |
| 2572231818 | t3m_00174 | pfam00675      | Peptidase_M16                                                          | 6.50E-27 |
| 2572231818 | t3m_00174 | Locus_type     | CDS                                                                    |          |
| 2572231818 | t3m_00174 | Product_name   | Predicted Zn-dependent peptidases                                      |          |
| 2572231818 | t3m_00174 | Scaffold       | t3m_contig_70_18_len_82197_read_count_6592593.2                        |          |
| 2572231818 | t3m_00174 | Coordinates    | 65392..66720(-)                                                        |          |
| 2572231818 | t3m_00174 | DNA_length     | 1329bp                                                                 |          |
| 2572231818 | t3m_00174 | Protein_length | 442aa                                                                  |          |
| 2572231818 | t3m_00174 | GC             |                                                                        | 0.7      |
| 2572231819 | t3m_00175 | KEGG_module    | M00117: Ubiquinone biosynthesis, prokaryotes, chorismate => ubiquinone |          |
| 2572231819 | t3m_00175 | Metacyc        | PWY-5132: humulone biosynthesis                                        |          |
| 2572231819 | t3m_00175 | Metacyc        | PWY-6834: spermidine biosynthesis III                                  |          |
| 2572231819 | t3m_00175 | Metacyc        | PWY-5816: all <i>trans</i> undecaprenyl diphosphate biosynthesis       |          |
| 2572231819 | t3m_00175 | Metacyc        | PWY-5817: dodecaprenyl diphosphate biosynthesis                        |          |
| 2572231819 | t3m_00175 | Metacyc        | PWY-6262: demethylmenaquinol-8 biosynthesis II                         |          |
| 2572231819 | t3m_00175 | Metacyc        | PWY-6403: carrageenan biosynthesis                                     |          |
| 2572231819 | t3m_00175 | Metacyc        | PWY-2681: <i>trans</i>-zeatin biosynthesis                             |          |
| 2572231819 | t3m_00175 | Metacyc        | PWY-5135: xanthohumol biosynthesis                                     |          |
| 2572231819 | t3m_00175 | Metacyc        | PWY-6681: neurosporaxanthin biosynthesis                               |          |
| 2572231819 | t3m_00175 | Metacyc        | PWY-5133: cohumulone biosynthesis                                      |          |
| 2572231819 | t3m_00175 | Metacyc        | PWY-702: methionine biosynthesis II                                    |          |
| 2572231819 | t3m_00175 | Metacyc        | PWY-5893: tridecaprenyl diphosphate biosynthesis                       |          |
| 2572231819 | t3m_00175 | Metacyc        | PWY-5802: alizarin biosynthesis                                        |          |
| 2572231819 | t3m_00175 | Metacyc        | PWY-5365: linear furanocoumarin biosynthesis                           |          |
| 2572231819 | t3m_00175 | Metacyc        | PWY-7169: hyperxanthone E biosynthesis                                 |          |
| 2572231819 | t3m_00175 | Metacyc        | PWY-5808: hyperforin and adhyperforin biosynthesis                     |          |
| 2572231819 | t3m_00175 | Metacyc        | PWY-5770: phenazine-1-carboxylate biosynthesis                         |          |
| 2572231819 | t3m_00175 | Metacyc        | PWY-4681: kievitone biosynthesis                                       |          |
| 2572231819 | t3m_00175 | Metacyc        | PWY-4502: wighteone and luteone biosynthesis                           |          |
| 2572231819 | t3m_00175 | Metacyc        | PWY-6936: seleno-amino acid biosynthesis                               |          |

|            |           |                |                                                                                                       |          |
|------------|-----------|----------------|-------------------------------------------------------------------------------------------------------|----------|
| 2572231819 | t3m_00175 | Metacyc        | PWY-5068: chlorophyll cycle                                                                           |          |
| 2572231819 | t3m_00175 | Metacyc        | PWY-5064: chlorophyll <i>a</i> biosynthesis II                                                        |          |
| 2572231819 | t3m_00175 | Metacyc        | PWY-5027: phylloquinol biosynthesis                                                                   |          |
| 2572231819 | t3m_00175 | Metacyc        | PWY-6793: demethylmenaquinol-8 biosynthesis III                                                       |          |
| 2572231819 | t3m_00175 | IMG_pathway    | 48: 2,3-Di-O-geranylgeranylgeranyl 3-phosphate biosynthesis                                           |          |
| 2572231819 | t3m_00175 | COG_category   | [H] Coenzyme transport and metabolism                                                                 |          |
| 2572231819 | t3m_00175 | COG0382        | 4-hydroxybenzoate polyprenyltransferase and related prenyltransferase                                 | 1.00E-19 |
| 2572231819 | t3m_00175 | pfam01040      | UbiA                                                                                                  | 5.60E-31 |
| 2572231819 | t3m_00175 | EC:2.5.1.-     | Transferases. Transferring alkyl or aryl groups, other than methyl groups. Transferring alkyl or aryl |          |
| 2572231819 | t3m_00175 | KO:K03179      | 4-hydroxybenzoate octaprenyltransferase [EC:2.5.1.-]                                                  | 6.00E-42 |
| 2572231819 | t3m_00175 | ITERM:00052    | geranylgeranylglycerol-phosphate geranylgeranyltransferase (EC 2.5.1.42)                              |          |
| 2572231819 | t3m_00175 | Locus_type     | CDS                                                                                                   |          |
| 2572231819 | t3m_00175 | Product_name   | geranylgeranylglycerol-phosphate geranylgeranyltransferase (EC 2.5.1.4:                               |          |
| 2572231819 | t3m_00175 | Scaffold       | t3m_contig_70_18_len_82197_read_count_6592593.2                                                       |          |
| 2572231819 | t3m_00175 | Coordinates    | 66847..67674(+)                                                                                       |          |
| 2572231819 | t3m_00175 | DNA_length     | 828bp                                                                                                 |          |
| 2572231819 | t3m_00175 | Protein_length | 275aa                                                                                                 |          |
| 2572231819 | t3m_00175 | GC             |                                                                                                       | 0.68     |
| 2572231819 | t3m_00175 | Transmembrane  | Yes                                                                                                   |          |
| 2572231820 | t3m_00176 | Metacyc        | PWY-702: methionine biosynthesis II                                                                   |          |
| 2572231820 | t3m_00176 | Metacyc        | PWY-5133: cohumulone biosynthesis                                                                     |          |
| 2572231820 | t3m_00176 | Metacyc        | PWY-5808: hyperforin and adhyperforin biosynthesis                                                    |          |
| 2572231820 | t3m_00176 | Metacyc        | PWY-6834: spermidine biosynthesis III                                                                 |          |
| 2572231820 | t3m_00176 | Metacyc        | PWY-5064: chlorophyll <i>a</i> biosynthesis II                                                        |          |
| 2572231820 | t3m_00176 | Metacyc        | PWY-6403: carrageenan biosynthesis                                                                    |          |
| 2572231820 | t3m_00176 | Metacyc        | PWY-5365: linear furanocoumarin biosynthesis                                                          |          |
| 2572231820 | t3m_00176 | Metacyc        | PWY-7169: hyperxanthone E biosynthesis                                                                |          |
| 2572231820 | t3m_00176 | Metacyc        | PWY-5132: humulone biosynthesis                                                                       |          |
| 2572231820 | t3m_00176 | Metacyc        | PWY-6262: demethylmenaquinol-8 biosynthesis II                                                        |          |
| 2572231820 | t3m_00176 | Metacyc        | PWY-6936: seleno-amino acid biosynthesis                                                              |          |
| 2572231820 | t3m_00176 | Metacyc        | PWY-5893: tridecaprenyl diphosphate biosynthesis                                                      |          |
| 2572231820 | t3m_00176 | Metacyc        | PWY-5027: phylloquinol biosynthesis                                                                   |          |
| 2572231820 | t3m_00176 | Metacyc        | PWY-6793: demethylmenaquinol-8 biosynthesis III                                                       |          |

|            |           |                |                                                                                                       |          |
|------------|-----------|----------------|-------------------------------------------------------------------------------------------------------|----------|
| 2572231820 | t3m_00176 | Metacyc        | PWY-5068: chlorophyll cycle                                                                           |          |
| 2572231820 | t3m_00176 | Metacyc        | PWY-5816: all <i>trans</i> undecaprenyl diphosphate biosynthesis                                      |          |
| 2572231820 | t3m_00176 | Metacyc        | PWY-5770: phenazine-1-carboxylate biosynthesis                                                        |          |
| 2572231820 | t3m_00176 | Metacyc        | PWY-4502: wighteone and luteone biosynthesis                                                          |          |
| 2572231820 | t3m_00176 | Metacyc        | PWY-5817: dodecaprenyl diphosphate biosynthesis                                                       |          |
| 2572231820 | t3m_00176 | Metacyc        | PWY-2681: <i>trans</i>-zeatin biosynthesis                                                            |          |
| 2572231820 | t3m_00176 | Metacyc        | PWY-5135: xanthohumol biosynthesis                                                                    |          |
| 2572231820 | t3m_00176 | Metacyc        | PWY-4681: kievitone biosynthesis                                                                      |          |
| 2572231820 | t3m_00176 | Metacyc        | PWY-5802: alizarin biosynthesis                                                                       |          |
| 2572231820 | t3m_00176 | Metacyc        | PWY-6681: neurosporaxanthin biosynthesis                                                              |          |
| 2572231820 | t3m_00176 | COG_category   | [R] General function prediction only                                                                  |          |
| 2572231820 | t3m_00176 | COG1646        | Predicted phosphate-binding enzymes, TIM-barrel fold                                                  | 2.00E-54 |
| 2572231820 | t3m_00176 | pfam01884      | PcrB                                                                                                  | 6.40E-59 |
| 2572231820 | t3m_00176 | EC:2.5.1.-     | Transferases. Transferring alkyl or aryl groups, other than methyl groups. Transferring alkyl or aryl |          |
| 2572231820 | t3m_00176 | TIGR01768      | geranylgeranylgeranyl glycerol phosphate synthase family protein                                      | 1.40E-64 |
| 2572231820 | t3m_00176 | TIGR01769      | phosphoglycerol geranylgeranyltransferase                                                             | 5.00E-66 |
| 2572231820 | t3m_00176 | KO:K07094      | putative glycerol-1-phosphate prenyltransferase [EC:2.5.1.-]                                          | 0.00E+00 |
| 2572231820 | t3m_00176 | Locus_type     | CDS                                                                                                   |          |
| 2572231820 | t3m_00176 | Product_name   | phosphoglycerol geranylgeranyltransferase                                                             |          |
| 2572231820 | t3m_00176 | Scaffold       | t3m_contig_70_18_len_82197_read_count_6592593.2                                                       |          |
| 2572231820 | t3m_00176 | Coordinates    | 67674..68438(+)                                                                                       |          |
| 2572231820 | t3m_00176 | DNA_length     | 765bp                                                                                                 |          |
| 2572231820 | t3m_00176 | Protein_length | 254aa                                                                                                 |          |
| 2572231820 | t3m_00176 | GC             |                                                                                                       | 0.69     |
| 2572231821 | t3m_00177 | COG_category   | [S] Function unknown                                                                                  |          |
| 2572231821 | t3m_00177 | COG3356        | Predicted membrane protein                                                                            | 4.00E-57 |
| 2572231821 | t3m_00177 | pfam09843      | DUF2070                                                                                               | 9.20E-28 |
| 2572231821 | t3m_00177 | KO:K08979      | putative membrane protein                                                                             | 0.00E+00 |
| 2572231821 | t3m_00177 | Locus_type     | CDS                                                                                                   |          |
| 2572231821 | t3m_00177 | Product_name   | Predicted membrane protein                                                                            |          |
| 2572231821 | t3m_00177 | Scaffold       | t3m_contig_70_18_len_82197_read_count_6592593.2                                                       |          |
| 2572231821 | t3m_00177 | Coordinates    | 68428..70242(+)                                                                                       |          |
| 2572231821 | t3m_00177 | DNA_length     | 1815bp                                                                                                |          |

|            |           |                |                                                                       |          |
|------------|-----------|----------------|-----------------------------------------------------------------------|----------|
| 2572231821 | t3m_00177 | Protein_length | 604aa                                                                 |          |
| 2572231821 | t3m_00177 | GC             |                                                                       | 0.68     |
| 2572231821 | t3m_00177 | Transmembrane  | Yes                                                                   |          |
| 2572231822 | t3m_00178 | pfam01546      | Peptidase_M20                                                         | 6.80E-23 |
| 2572231822 | t3m_00178 | Locus_type     | CDS                                                                   |          |
| 2572231822 | t3m_00178 | Product_name   | Peptidase family M20/M25/M40                                          |          |
| 2572231822 | t3m_00178 | Scaffold       | t3m_contig_70_18_len_82197_read_count_6592593.2                       |          |
| 2572231822 | t3m_00178 | Coordinates    | 70250..71881(+)                                                       |          |
| 2572231822 | t3m_00178 | DNA_length     | 1632bp                                                                |          |
| 2572231822 | t3m_00178 | Protein_length | 543aa                                                                 |          |
| 2572231822 | t3m_00178 | GC             |                                                                       | 0.71     |
| 2572231823 | t3m_00179 | COG_category   | [I] Lipid transport and metabolism                                    |          |
| 2572231823 | t3m_00179 | COG0575        | CDP-diglyceride synthetase                                            | 4.00E-05 |
| 2572231823 | t3m_00179 | pfam01864      | DUF46                                                                 | 1.30E-36 |
| 2572231823 | t3m_00179 | Locus_type     | CDS                                                                   |          |
| 2572231823 | t3m_00179 | Product_name   | CDP-diglyceride synthetase                                            |          |
| 2572231823 | t3m_00179 | Scaffold       | t3m_contig_70_18_len_82197_read_count_6592593.2                       |          |
| 2572231823 | t3m_00179 | Coordinates    | 71897..72475(+)                                                       |          |
| 2572231823 | t3m_00179 | DNA_length     | 579bp                                                                 |          |
| 2572231823 | t3m_00179 | Protein_length | 192aa                                                                 |          |
| 2572231823 | t3m_00179 | GC             |                                                                       | 0.69     |
| 2572231823 | t3m_00179 | Transmembrane  | Yes                                                                   |          |
| 2572231824 | t3m_00180 | KEGG_module    | M00051: Uridine monophosphate biosynthesis, glutamine (+ PRPP) => UMP |          |
| 2572231824 | t3m_00180 | Metacyc        | PWY-5686: UMP biosynthesis                                            |          |
| 2572231824 | t3m_00180 | IMG_pathway    | 321: Uridine 5'-monophosphate biosynthesis                            |          |
| 2572231824 | t3m_00180 | COG_category   | [F] Nucleotide transport and metabolism                               |          |
| 2572231824 | t3m_00180 | COG0461        | Orotate phosphoribosyltransferase                                     | 9.00E-41 |
| 2572231824 | t3m_00180 | pfam00156      | Pribosyltran                                                          | 1.20E-09 |
| 2572231824 | t3m_00180 | EC:2.4.2.10    | Orotate phosphoribosyltransferase.                                    |          |
| 2572231824 | t3m_00180 | TIGR00336      | orotate phosphoribosyltransferase                                     | 6.90E-47 |
| 2572231824 | t3m_00180 | KO:K00762      | orotate phosphoribosyltransferase [EC:2.4.2.10]                       | 5.40E-39 |

|            |           |                |                                                                             |           |
|------------|-----------|----------------|-----------------------------------------------------------------------------|-----------|
| 2572231824 | t3m_00180 | ITERM:01392    | orotate phosphoribosyltransferase (EC 2.4.2.10)                             |           |
| 2572231824 | t3m_00180 | Locus_type     | CDS                                                                         |           |
| 2572231824 | t3m_00180 | Product_name   | orotate phosphoribosyltransferase (EC 2.4.2.10)                             |           |
| 2572231824 | t3m_00180 | Scaffold       | t3m_contig_70_18_len_82197_read_count_6592593.2                             |           |
| 2572231824 | t3m_00180 | Coordinates    | 72472..73026(+)                                                             |           |
| 2572231824 | t3m_00180 | DNA_length     | 555bp                                                                       |           |
| 2572231824 | t3m_00180 | Protein_length | 184aa                                                                       |           |
| 2572231824 | t3m_00180 | GC             |                                                                             | 0.7       |
|            |           |                |                                                                             |           |
| 2572231825 | t3m_00181 | Metacyc        | PWY-6689: tRNA splicing                                                     |           |
| 2572231825 | t3m_00181 | COG_category   | [J] Translation, ribosomal structure and biogenesis                         |           |
| 2572231825 | t3m_00181 | COG1676        | tRNA splicing endonuclease                                                  | 3.00E-26  |
| 2572231825 | t3m_00181 | pfam01974      | tRNA_int_endo                                                               | 8.70E-09  |
| 2572231825 | t3m_00181 | pfam01974      | tRNA_int_endo                                                               | 2.80E-22  |
| 2572231825 | t3m_00181 | pfam02778      | tRNA_int_endo_N                                                             | 7.90E-10  |
| 2572231825 | t3m_00181 | pfam02778      | tRNA_int_endo_N                                                             | 5.20E-08  |
| 2572231825 | t3m_00181 | EC:3.1.27.9    | tRNA-intron endonuclease.                                                   |           |
| 2572231825 | t3m_00181 | TIGR00324      | tRNA-intron endonuclease                                                    | 1.10E-18  |
| 2572231825 | t3m_00181 | KO:K01170      | tRNA-intron endonuclease, archaea type [EC:3.1.27.9]                        | 0.00E+00  |
| 2572231825 | t3m_00181 | Locus_type     | CDS                                                                         |           |
| 2572231825 | t3m_00181 | Product_name   | tRNA splicing endonuclease                                                  |           |
| 2572231825 | t3m_00181 | Scaffold       | t3m_contig_70_18_len_82197_read_count_6592593.2                             |           |
| 2572231825 | t3m_00181 | Coordinates    | 73023..74087(+)                                                             |           |
| 2572231825 | t3m_00181 | DNA_length     | 1065bp                                                                      |           |
| 2572231825 | t3m_00181 | Protein_length | 354aa                                                                       |           |
| 2572231825 | t3m_00181 | GC             |                                                                             | 0.71      |
|            |           |                |                                                                             |           |
| 2572231826 | t3m_00182 | KEGG_module    | M00022: Shikimate pathway, phosphoenolpyruvate + erythrose-4P => chorismate |           |
| 2572231826 | t3m_00182 | Metacyc        | PWY-6163: chorismate biosynthesis from 3-dehydroquinate                     |           |
| 2572231826 | t3m_00182 | IMG_pathway    | 146: Chorismate synthesis                                                   |           |
| 2572231826 | t3m_00182 | IMG_pathway    | 519: Archaeal chorismate synthesis                                          |           |
| 2572231826 | t3m_00182 | COG_category   | [E] Amino acid transport and metabolism                                     |           |
| 2572231826 | t3m_00182 | COG0082        | Chorismate synthase                                                         | 8.00E-111 |
| 2572231826 | t3m_00182 | pfam01264      | Chorismate_synt                                                             | 2.00E-119 |



|            |           |                |                                                                             |           |
|------------|-----------|----------------|-----------------------------------------------------------------------------|-----------|
| 2572231826 | t3m_00182 | EC:4.2.3.5     | Chorismate synthase.                                                        |           |
| 2572231826 | t3m_00182 | TIGR00033      | chorismate synthase                                                         | 2.50E-119 |
| 2572231826 | t3m_00182 | KO:K01736      | chorismate synthase [EC:4.2.3.5]                                            | 0.00E+00  |
| 2572231826 | t3m_00182 | ITERM:00348    | chorismate synthase (EC 4.2.3.5)                                            |           |
| 2572231826 | t3m_00182 | Locus_type     | CDS                                                                         |           |
| 2572231826 | t3m_00182 | Product_name   | chorismate synthase (EC 4.2.3.5)                                            |           |
| 2572231826 | t3m_00182 | Scaffold       | t3m_contig_70_18_len_82197_read_count_6592593.2                             |           |
| 2572231826 | t3m_00182 | Coordinates    | 74107..75189(-)                                                             |           |
| 2572231826 | t3m_00182 | DNA_length     | 1083bp                                                                      |           |
| 2572231826 | t3m_00182 | Protein_length | 360aa                                                                       |           |
| 2572231826 | t3m_00182 | GC             |                                                                             | 0.71      |
| 2572231827 | t3m_00183 | KEGG_module    | M00022: Shikimate pathway, phosphoenolpyruvate + erythrose-4P => chorismate |           |
| 2572231827 | t3m_00183 | Metacyc        | PWY-6163: chorismate biosynthesis from 3-dehydroquinone                     |           |
| 2572231827 | t3m_00183 | IMG_pathway    | 146: Chorismate synthesis                                                   |           |
| 2572231827 | t3m_00183 | IMG_pathway    | 519: Archaeal chorismate synthesis                                          |           |
| 2572231827 | t3m_00183 | COG_category   | [E] Amino acid transport and metabolism                                     |           |
| 2572231827 | t3m_00183 | COG0128        | 5-enolpyruvylshikimate-3-phosphate synthase                                 | 3.00E-88  |
| 2572231827 | t3m_00183 | pfam00275      | EPSP_synthase                                                               | 5.80E-82  |
| 2572231827 | t3m_00183 | EC:2.5.1.19    | 3-phosphoshikimate 1-carboxyvinyltransferase.                               |           |
| 2572231827 | t3m_00183 | TIGR01356      | 3-phosphoshikimate 1-carboxyvinyltransferase                                | 1.70E-105 |
| 2572231827 | t3m_00183 | KO:K00800      | 3-phosphoshikimate 1-carboxyvinyltransferase [EC:2.5.1.19]                  | 0.00E+00  |
| 2572231827 | t3m_00183 | ITERM:00342    | 3-phosphoshikimate 1-carboxyvinyltransferase (EC 2.5.1.19)                  |           |
| 2572231827 | t3m_00183 | Locus_type     | CDS                                                                         |           |
| 2572231827 | t3m_00183 | Product_name   | 3-phosphoshikimate 1-carboxyvinyltransferase (EC 2.5.1.19)                  |           |
| 2572231827 | t3m_00183 | Scaffold       | t3m_contig_70_18_len_82197_read_count_6592593.2                             |           |
| 2572231827 | t3m_00183 | Coordinates    | 75189..76463(-)                                                             |           |
| 2572231827 | t3m_00183 | DNA_length     | 1275bp                                                                      |           |
| 2572231827 | t3m_00183 | Protein_length | 424aa                                                                       |           |
| 2572231827 | t3m_00183 | GC             |                                                                             | 0.72      |
| 2572231828 | t3m_00184 | KEGG_module    | M00022: Shikimate pathway, phosphoenolpyruvate + erythrose-4P => chorismate |           |
| 2572231828 | t3m_00184 | Metacyc        | PWY-6163: chorismate biosynthesis from 3-dehydroquinone                     |           |
| 2572231828 | t3m_00184 | IMG_pathway    | 146: Chorismate synthesis                                                   |           |

|            |           |                |                                                 |          |
|------------|-----------|----------------|-------------------------------------------------|----------|
| 2572231828 | t3m_00184 | IMG_pathway    | 519: Archaeal chorismate synthesis              |          |
| 2572231828 | t3m_00184 | COG_category   | [E] Amino acid transport and metabolism         |          |
| 2572231828 | t3m_00184 | COG_category   | [H] Coenzyme transport and metabolism           |          |
| 2572231828 | t3m_00184 | COG1685        | Archaeal shikimate kinase                       | 8.00E-41 |
| 2572231828 | t3m_00184 | pfam00288      | GHMP_kinases_N                                  | 8.90E-08 |
| 2572231828 | t3m_00184 | EC:2.7.1.71    | Shikimate kinase.                               |          |
| 2572231828 | t3m_00184 | TIGR01920      | shikimate kinase                                | 1.10E-55 |
| 2572231828 | t3m_00184 | KO:K00891      | shikimate kinase [EC:2.7.1.71]                  | 4.40E-27 |
| 2572231828 | t3m_00184 | ITERM:00339    | shikimate kinase (EC 2.7.1.71)                  |          |
| 2572231828 | t3m_00184 | Locus_type     | CDS                                             |          |
| 2572231828 | t3m_00184 | Product_name   | shikimate kinase (EC 2.7.1.71)                  |          |
| 2572231828 | t3m_00184 | Scaffold       | t3m_contig_70_18_len_82197_read_count_6592593.2 |          |
| 2572231828 | t3m_00184 | Coordinates    | 76460..77335(-)                                 |          |
| 2572231828 | t3m_00184 | DNA_length     | 876bp                                           |          |
| 2572231828 | t3m_00184 | Protein_length | 291aa                                           |          |
| 2572231828 | t3m_00184 | GC             |                                                 | 0.71     |
|            |           |                |                                                 |          |
| 2572231829 | t3m_00185 | IMG_pathway    | 146: Chorismate synthesis                       |          |
| 2572231829 | t3m_00185 | IMG_pathway    | 519: Archaeal chorismate synthesis              |          |
| 2572231829 | t3m_00185 | COG_category   | [E] Amino acid transport and metabolism         |          |
| 2572231829 | t3m_00185 | COG0169        | Shikimate 5-dehydrogenase                       | 5.00E-43 |
| 2572231829 | t3m_00185 | pfam08501      | Shikimate_dh_N                                  | 2.90E-16 |
| 2572231829 | t3m_00185 | pfam01487      | DHquinase_I                                     | 2.30E-16 |
| 2572231829 | t3m_00185 | ITERM:00333    | 3-dehydroquininate dehydratase (EC 4.2.1.10)    |          |
| 2572231829 | t3m_00185 | Locus_type     | CDS                                             |          |
| 2572231829 | t3m_00185 | Product_name   | 3-dehydroquininate dehydratase (EC 4.2.1.10)    |          |
| 2572231829 | t3m_00185 | Scaffold       | t3m_contig_70_18_len_82197_read_count_6592593.2 |          |
| 2572231829 | t3m_00185 | Coordinates    | 77332..78762(-)                                 |          |
| 2572231829 | t3m_00185 | DNA_length     | 1431bp                                          |          |
| 2572231829 | t3m_00185 | Protein_length | 476aa                                           |          |
| 2572231829 | t3m_00185 | GC             |                                                 | 0.7      |
|            |           |                |                                                 |          |
| 2572231830 | t3m_00186 | Metacyc        | PWY-6422: D-arginine degradation                |          |
| 2572231830 | t3m_00186 | IMG_pathway    | 519: Archaeal chorismate synthesis              |          |

|            |           |                |                                                                                              |          |
|------------|-----------|----------------|----------------------------------------------------------------------------------------------|----------|
| 2572231830 | t3m_00186 | COG_category   | [E] Amino acid transport and metabolism                                                      |          |
| 2572231830 | t3m_00186 | COG1465        | Predicted alternative 3-dehydroquinase synthase                                              | 9.00E-51 |
| 2572231830 | t3m_00186 | pfam01959      | DHQS                                                                                         | 5.40E-75 |
| 2572231830 | t3m_00186 | EC:1.4.1.-     | Oxidoreductases. Acting on the CH-NH(2) group of donors. With NAD(+) or NADP(+) as acceptor. |          |
| 2572231830 | t3m_00186 | KO:K11646      | dehydroquinase synthase II [EC:1.4.1.-]                                                      | 1.40E-45 |
| 2572231830 | t3m_00186 | ITERM:03010    | 3-dehydroquinase synthase II                                                                 |          |
| 2572231830 | t3m_00186 | Locus_type     | CDS                                                                                          |          |
| 2572231830 | t3m_00186 | Product_name   | 3-dehydroquinase synthase II                                                                 |          |
| 2572231830 | t3m_00186 | Scaffold       | t3m_contig_70_18_len_82197_read_count_6592593.2                                              |          |
| 2572231830 | t3m_00186 | Coordinates    | 78828..79859(-)                                                                              |          |
| 2572231830 | t3m_00186 | DNA_length     | 1032bp                                                                                       |          |
| 2572231830 | t3m_00186 | Protein_length | 343aa                                                                                        |          |
| 2572231830 | t3m_00186 | GC             |                                                                                              | 0.71     |
|            |           |                |                                                                                              |          |
| 2572231831 | t3m_00187 | Metacyc        | SUCSYN-PWY: sucrose biosynthesis                                                             |          |
| 2572231831 | t3m_00187 | Metacyc        | PWY-1861: formaldehyde assimilation II (RuMP Cycle)                                          |          |
| 2572231831 | t3m_00187 | Metacyc        | ANAGLYCOLYSIS-PWY: glycolysis III (glucokinase)                                              |          |
| 2572231831 | t3m_00187 | Metacyc        | P185-PWY: formaldehyde assimilation III (dihydroxyacetone cycle)                             |          |
| 2572231831 | t3m_00187 | Metacyc        | CALVIN-PWY: Calvin-Benson-Bassham cycle                                                      |          |
| 2572231831 | t3m_00187 | Metacyc        | P341-PWY: glycolysis V (Pyrococcus)                                                          |          |
| 2572231831 | t3m_00187 | Metacyc        | PWY-5484: glycolysis II (from fructose-6P)                                                   |          |
| 2572231831 | t3m_00187 | Metacyc        | GLUCONEO-PWY: gluconeogenesis I                                                              |          |
| 2572231831 | t3m_00187 | Metacyc        | PWY-1042: glycolysis IV (plant cytosol)                                                      |          |
| 2572231831 | t3m_00187 | Metacyc        | PWY-6160: 3-dehydroquinase biosynthesis II (archaea)                                         |          |
| 2572231831 | t3m_00187 | Metacyc        | PWY-6142: gluconeogenesis II ( <i>Methanobacterium thermoautotrophicum</i> )                 |          |
| 2572231831 | t3m_00187 | Metacyc        | GLYCOLYSIS: glycolysis I                                                                     |          |
| 2572231831 | t3m_00187 | Metacyc        | PWY66-373: sucrose degradation V (mammalian)                                                 |          |
| 2572231831 | t3m_00187 | COG_category   | [G] Carbohydrate transport and metabolism                                                    |          |
| 2572231831 | t3m_00187 | COG1830        | DhnA-type fructose-1,6-bisphosphate aldolase and related enzymes                             | 2.00E-52 |
| 2572231831 | t3m_00187 | pfam01791      | DeoC                                                                                         | 3.10E-30 |
| 2572231831 | t3m_00187 | EC:4.1.2.13    | Fructose-bisphosphate aldolase.                                                              |          |
| 2572231831 | t3m_00187 | EC:2.2.1.10    | 2-amino-3,7-dideoxy-D-threo-hept-6-ulosonate synthase.                                       |          |
| 2572231831 | t3m_00187 | KO:K16306      | fructose-bisphosphate aldolase / 2-amino-3,7-dideoxy-D-threo-hept-6-ulosonate synthase       | 0.00E+00 |
| 2572231831 | t3m_00187 | Locus_type     | CDS                                                                                          |          |

|            |           |                |                                                                  |          |
|------------|-----------|----------------|------------------------------------------------------------------|----------|
| 2572231831 | t3m_00187 | Product_name   | DhnA-type fructose-1,6-bisphosphate aldolase and related enzymes |          |
| 2572231831 | t3m_00187 | Scaffold       | t3m_contig_70_18_len_82197_read_count_6592593.2                  |          |
| 2572231831 | t3m_00187 | Coordinates    | 79870..80622(-)                                                  |          |
| 2572231831 | t3m_00187 | DNA_length     | 753bp                                                            |          |
| 2572231831 | t3m_00187 | Protein_length | 250aa                                                            |          |
| 2572231831 | t3m_00187 | GC             |                                                                  | 0.68     |
| 2572231832 | t3m_00188 | COG_category   | [H] Coenzyme transport and metabolism                            |          |
| 2572231832 | t3m_00188 | COG5424        | Pyrroloquinoline quinone (Coenzyme PQQ) biosynthesis protein C   | 4.00E-19 |
| 2572231832 | t3m_00188 | pfam03070      | TENA_THI-4                                                       | 5.00E-10 |
| 2572231832 | t3m_00188 | Locus_type     | CDS                                                              |          |
| 2572231832 | t3m_00188 | Product_name   | Pyrroloquinoline quinone (Coenzyme PQQ) biosynthesis protein C   |          |
| 2572231832 | t3m_00188 | Scaffold       | t3m_contig_70_18_len_82197_read_count_6592593.2                  |          |
| 2572231832 | t3m_00188 | Coordinates    | 80677..81417(-)                                                  |          |
| 2572231832 | t3m_00188 | DNA_length     | 741bp                                                            |          |
| 2572231832 | t3m_00188 | Protein_length | 246aa                                                            |          |
| 2572231832 | t3m_00188 | GC             |                                                                  | 0.67     |
| 2572231833 | t3m_00189 | pfam02515      | CoA_transf_3                                                     | 4.20E-42 |
| 2572231833 | t3m_00189 | Locus_type     | CDS                                                              |          |
| 2572231833 | t3m_00189 | Product_name   | CoA-transferase family III                                       |          |
| 2572231833 | t3m_00189 | Scaffold       | t3m_contig_70_18_len_82197_read_count_6592593.2                  |          |
| 2572231833 | t3m_00189 | Coordinates    | 81505..82194(+)                                                  |          |
| 2572231833 | t3m_00189 | DNA_length     | 690bp                                                            |          |
| 2572231833 | t3m_00189 | Protein_length | 230aa                                                            |          |
| 2572231833 | t3m_00189 | GC             |                                                                  | 0.67     |
| 2572231834 | t3m_00190 | pfam03029      | ATP_bind_1                                                       | 7.20E-29 |
| 2572231834 | t3m_00190 | Locus_type     | CDS                                                              |          |
| 2572231834 | t3m_00190 | Product_name   | Conserved hypothetical ATP binding protein                       |          |
| 2572231834 | t3m_00190 | Scaffold       | t3m_contig_70_28_len_67510_read_count_6030377.3                  |          |
| 2572231834 | t3m_00190 | Coordinates    | 2..322(-)                                                        |          |
| 2572231834 | t3m_00190 | DNA_length     | 321bp                                                            |          |
| 2572231834 | t3m_00190 | Protein_length | 107aa                                                            |          |

|            |           |                |                                                                                |          |
|------------|-----------|----------------|--------------------------------------------------------------------------------|----------|
| 2572231834 | t3m_00190 | GC             |                                                                                | 0.68     |
| 2572231835 | t3m_00191 | COG_category   | [U] Intracellular trafficking, secretion, and vesicular transport              |          |
| 2572231835 | t3m_00191 | COG1400        | Signal recognition particle 19 kDa protein                                     | 5.00E-14 |
| 2572231835 | t3m_00191 | pfam01922      | SRP19                                                                          | 9.80E-20 |
| 2572231835 | t3m_00191 | KO:K03105      | signal recognition particle subunit SRP19                                      | 7.20E-14 |
| 2572231835 | t3m_00191 | Locus_type     | CDS                                                                            |          |
| 2572231835 | t3m_00191 | Product_name   | Signal recognition particle 19 kDa protein                                     |          |
| 2572231835 | t3m_00191 | Scaffold       | t3m_contig_70_28_len_67510_read_count_6030377.3                                |          |
| 2572231835 | t3m_00191 | Coordinates    | 326..625(-)                                                                    |          |
| 2572231835 | t3m_00191 | DNA_length     | 300bp                                                                          |          |
| 2572231835 | t3m_00191 | Protein_length | 99aa                                                                           |          |
| 2572231835 | t3m_00191 | GC             |                                                                                | 0.66     |
| 2572231836 | t3m_00192 | KEGG_module    | M00179: Ribosome, archaea                                                      |          |
| 2572231836 | t3m_00192 | KEGG_module    | M00177: Ribosome, eukaryotes                                                   |          |
| 2572231836 | t3m_00192 | COG_category   | [J] Translation, ribosomal structure and biogenesis                            |          |
| 2572231836 | t3m_00192 | COG2007        | Ribosomal protein S8E                                                          | 7.00E-32 |
| 2572231836 | t3m_00192 | pfam01201      | Ribosomal_S8e                                                                  | 1.10E-35 |
| 2572231836 | t3m_00192 | TIGR00307      | ribosomal protein S8.e                                                         | 7.60E-47 |
| 2572231836 | t3m_00192 | KO:K02995      | small subunit ribosomal protein S8e                                            | 2.10E-37 |
| 2572231836 | t3m_00192 | Locus_type     | CDS                                                                            |          |
| 2572231836 | t3m_00192 | Product_name   | SSU ribosomal protein S8E                                                      |          |
| 2572231836 | t3m_00192 | Scaffold       | t3m_contig_70_28_len_67510_read_count_6030377.3                                |          |
| 2572231836 | t3m_00192 | Coordinates    | 643..1038(-)                                                                   |          |
| 2572231836 | t3m_00192 | DNA_length     | 396bp                                                                          |          |
| 2572231836 | t3m_00192 | Protein_length | 131aa                                                                          |          |
| 2572231836 | t3m_00192 | GC             |                                                                                | 0.68     |
| 2572231837 | t3m_00193 | KEGG_module    | M00527: Lysine biosynthesis, DAP aminotransferase pathway, aspartate => lysine |          |
| 2572231837 | t3m_00193 | KEGG_module    | M00526: Lysine biosynthesis, DAP dehydrogenase pathway, aspartate => lysine    |          |
| 2572231837 | t3m_00193 | KEGG_module    | M00016: Lysine biosynthesis, succinyl-DAP pathway, aspartate => lysine         |          |
| 2572231837 | t3m_00193 | KEGG_module    | M00525: Lysine biosynthesis, acetyl-DAP pathway, aspartate => lysine           |          |
| 2572231837 | t3m_00193 | Metacyc        | PWY-2942: lysine biosynthesis III                                              |          |

|            |           |                |                                                        |          |
|------------|-----------|----------------|--------------------------------------------------------|----------|
| 2572231837 | t3m_00193 | Metacyc        | PWY-2941: lysine biosynthesis II                       |          |
| 2572231837 | t3m_00193 | Metacyc        | PWY-5097: lysine biosynthesis VI                       |          |
| 2572231837 | t3m_00193 | Metacyc        | DAPLYSINESYN-PWY: lysine biosynthesis I                |          |
| 2572231837 | t3m_00193 | COG_category   | [E] Amino acid transport and metabolism                |          |
| 2572231837 | t3m_00193 | COG_category   | [M] Cell wall/membrane/envelope biogenesis             |          |
| 2572231837 | t3m_00193 | COG0329        | Dihydrodipicolinate synthase/N-acetylneuraminate lyase | 1.00E-57 |
| 2572231837 | t3m_00193 | pfam00701      | DHDPS                                                  | 4.20E-56 |
| 2572231837 | t3m_00193 | EC:4.3.3.7     | 4-hydroxy-tetrahydrodipicolinate synthase.             |          |
| 2572231837 | t3m_00193 | KO:K01714      | 4-hydroxy-tetrahydrodipicolinate synthase [EC:4.3.3.7] | 8.10E-38 |
| 2572231837 | t3m_00193 | Locus_type     | CDS                                                    |          |
| 2572231837 | t3m_00193 | Product_name   | Dihydrodipicolinate synthase/N-acetylneuraminate lyase |          |
| 2572231837 | t3m_00193 | Scaffold       | t3m_contig_70_28_len_67510_read_count_6030377.3        |          |
| 2572231837 | t3m_00193 | Coordinates    | 1088..2068(-)                                          |          |
| 2572231837 | t3m_00193 | DNA_length     | 981bp                                                  |          |
| 2572231837 | t3m_00193 | Protein_length | 326aa                                                  |          |
| 2572231837 | t3m_00193 | GC             |                                                        | 0.71     |
| 2572231838 | t3m_00194 | IMG_pathway    | 437: Archaeal replication elongation                   |          |
| 2572231838 | t3m_00194 | IMG_pathway    | 46: Okazaki fragment processing                        |          |
| 2572231838 | t3m_00194 | COG_category   | [L] Replication, recombination and repair              |          |
| 2572231838 | t3m_00194 | COG0164        | Ribonuclease HII                                       | 5.00E-30 |
| 2572231838 | t3m_00194 | pfam01351      | RNase_HII                                              | 2.70E-35 |
| 2572231838 | t3m_00194 | EC:3.1.26.4    | Ribonuclease H.                                        |          |
| 2572231838 | t3m_00194 | TIGR00729      | ribonuclease H, mammalian HI/archaeal HII subfamily    | 6.50E-55 |
| 2572231838 | t3m_00194 | KO:K03470      | ribonuclease HII [EC:3.1.26.4]                         | 0.00E+00 |
| 2572231838 | t3m_00194 | ITERM:00110    | RNase HII (EC 3.1.26.4)                                |          |
| 2572231838 | t3m_00194 | Locus_type     | CDS                                                    |          |
| 2572231838 | t3m_00194 | Product_name   | RNase HII (EC 3.1.26.4)                                |          |
| 2572231838 | t3m_00194 | Scaffold       | t3m_contig_70_28_len_67510_read_count_6030377.3        |          |
| 2572231838 | t3m_00194 | Coordinates    | 2096..2800(+)                                          |          |
| 2572231838 | t3m_00194 | DNA_length     | 705bp                                                  |          |
| 2572231838 | t3m_00194 | Protein_length | 234aa                                                  |          |
| 2572231838 | t3m_00194 | GC             |                                                        | 0.73     |

|            |           |                |                                                                                             |                                                 |          |          |
|------------|-----------|----------------|---------------------------------------------------------------------------------------------|-------------------------------------------------|----------|----------|
| 2572231839 | t3m_00195 | pfam02036      | SCP2                                                                                        |                                                 | 1.40E-13 |          |
| 2572231839 | t3m_00195 | Locus_type     |                                                                                             | CDS                                             |          |          |
| 2572231839 | t3m_00195 | Product_name   |                                                                                             | SCP-2 sterol transfer family                    |          |          |
| 2572231839 | t3m_00195 | Scaffold       |                                                                                             | t3m_contig_70_28_len_67510_read_count_6030377.3 |          |          |
| 2572231839 | t3m_00195 | Coordinates    |                                                                                             | 2797..3132(+)                                   |          |          |
| 2572231839 | t3m_00195 | DNA_length     |                                                                                             | 336bp                                           |          |          |
| 2572231839 | t3m_00195 | Protein_length |                                                                                             | 111aa                                           |          |          |
| 2572231839 | t3m_00195 | GC             |                                                                                             |                                                 | 0.65     |          |
| 2572231840 | t3m_00196 | KEGG_module    | M00133: Polyamine biosynthesis, arginine => agmatine => putrescine => spermidine            |                                                 |          |          |
| 2572231840 | t3m_00196 | Metacyc        | PWY-40: putrescine biosynthesis I                                                           |                                                 |          |          |
| 2572231840 | t3m_00196 | Metacyc        | ARGDEG-III-PWY: arginine degradation IV (arginine decarboxylase/agmatine deiminase pathway) |                                                 |          |          |
| 2572231840 | t3m_00196 | Metacyc        | PWY0-1299: arginine dependent acid resistance                                               |                                                 |          |          |
| 2572231840 | t3m_00196 | Metacyc        | PWY0-823: arginine degradation III (arginine decarboxylase/agmatinase pathway)              |                                                 |          |          |
| 2572231840 | t3m_00196 | Metacyc        | PWY-43: putrescine biosynthesis II                                                          |                                                 |          |          |
| 2572231840 | t3m_00196 | Metacyc        | PWY-6305: putrescine biosynthesis IV                                                        |                                                 |          |          |
| 2572231840 | t3m_00196 | Metacyc        | PWY-6834: spermidine biosynthesis III                                                       |                                                 |          |          |
| 2572231840 | t3m_00196 | IMG_pathway    | 186: L-arginine degradation by Arg decarboxylase pathway                                    |                                                 |          |          |
| 2572231840 | t3m_00196 | IMG_pathway    | 524: Spermidine synthesis via aminopropylagmatine                                           |                                                 |          |          |
| 2572231840 | t3m_00196 | IMG_pathway    | 823: Putrescine synthesis from L-arginine                                                   |                                                 |          |          |
| 2572231840 | t3m_00196 | COG_category   | [S] Function unknown                                                                        |                                                 |          |          |
| 2572231840 | t3m_00196 | COG1945        | Uncharacterized conserved protein                                                           |                                                 |          | 2.00E-17 |
| 2572231840 | t3m_00196 | pfam01862      | PvlArgDC                                                                                    |                                                 |          | 3.70E-27 |
| 2572231840 | t3m_00196 | EC:4.1.1.19    | Arginine decarboxylase.                                                                     |                                                 |          |          |
| 2572231840 | t3m_00196 | TIGR00286      | arginine decarboxylase, pyruvoyl-dependent                                                  |                                                 |          | 4.80E-25 |
| 2572231840 | t3m_00196 | KO:K02626      | arginine decarboxylase [EC:4.1.1.19]                                                        |                                                 |          | 3.40E-12 |
| 2572231840 | t3m_00196 | ITERM:00488    | arginine decarboxylase (EC 4.1.1.19)                                                        |                                                 |          |          |
| 2572231840 | t3m_00196 | Locus_type     |                                                                                             | CDS                                             |          |          |
| 2572231840 | t3m_00196 | Product_name   |                                                                                             | arginine decarboxylase (EC 4.1.1.19)            |          |          |
| 2572231840 | t3m_00196 | Scaffold       |                                                                                             | t3m_contig_70_28_len_67510_read_count_6030377.3 |          |          |
| 2572231840 | t3m_00196 | Coordinates    |                                                                                             | 3157..3597(-)                                   |          |          |
| 2572231840 | t3m_00196 | DNA_length     |                                                                                             | 441bp                                           |          |          |
| 2572231840 | t3m_00196 | Protein_length |                                                                                             | 146aa                                           |          |          |
| 2572231840 | t3m_00196 | GC             |                                                                                             |                                                 | 0.66     |          |

|            |           |                |                                                                   |          |
|------------|-----------|----------------|-------------------------------------------------------------------|----------|
| 2572231841 | t3m_00197 | KEGG_module    | M00345: Formaldehyde assimilation, ribulose monophosphate pathway |          |
| 2572231841 | t3m_00197 | Metacyc        | PWY-1861: formaldehyde assimilation II (RuMP Cycle)               |          |
| 2572231841 | t3m_00197 | Metacyc        | RUMP-PWY: formaldehyde oxidation I                                |          |
| 2572231841 | t3m_00197 | COG_category   | [M] Cell wall/membrane/envelope biogenesis                        |          |
| 2572231841 | t3m_00197 | COG0794        | Predicted sugar phosphate isomerase involved in capsule formation | 2.00E-25 |
| 2572231841 | t3m_00197 | pfam01380      | SIS                                                               | 7.70E-15 |
| 2572231841 | t3m_00197 | EC:5.3.1.27    | 6-phospho-3-hexuloisomerase.                                      |          |
| 2572231841 | t3m_00197 | TIGR03127      | 6-phospho 3-hexuloisomerase                                       | 4.40E-48 |
| 2572231841 | t3m_00197 | KO:K08094      | 6-phospho-3-hexuloisomerase [EC:5.3.1.27]                         | 5.80E-36 |
| 2572231841 | t3m_00197 | Locus_type     | CDS                                                               |          |
| 2572231841 | t3m_00197 | Product_name   | Predicted sugar phosphate isomerase involved in capsule formation |          |
| 2572231841 | t3m_00197 | Scaffold       | t3m_contig_70_28_len_67510_read_count_6030377.3                   |          |
| 2572231841 | t3m_00197 | Coordinates    | 3709..4281(-)                                                     |          |
| 2572231841 | t3m_00197 | DNA_length     | 573bp                                                             |          |
| 2572231841 | t3m_00197 | Protein_length | 190aa                                                             |          |
| 2572231841 | t3m_00197 | GC             |                                                                   | 0.67     |
| 2572231842 | t3m_00198 | COG_category   | [L] Replication, recombination and repair                         |          |
| 2572231842 | t3m_00198 | COG0648        | Endonuclease IV                                                   | 2.00E-24 |
| 2572231842 | t3m_00198 | pfam01261      | AP_endonuc_2                                                      | 8.50E-13 |
| 2572231842 | t3m_00198 | EC:3.1.21.2    | Deoxyribonuclease IV (phage-T(4)-induced).                        |          |
| 2572231842 | t3m_00198 | KO:K01151      | deoxyribonuclease IV [EC:3.1.21.2]                                | 0.00E+00 |
| 2572231842 | t3m_00198 | Locus_type     | CDS                                                               |          |
| 2572231842 | t3m_00198 | Product_name   | Endonuclease IV                                                   |          |
| 2572231842 | t3m_00198 | Scaffold       | t3m_contig_70_28_len_67510_read_count_6030377.3                   |          |
| 2572231842 | t3m_00198 | Coordinates    | 4259..5461(-)                                                     |          |
| 2572231842 | t3m_00198 | DNA_length     | 1203bp                                                            |          |
| 2572231842 | t3m_00198 | Protein_length | 400aa                                                             |          |
| 2572231842 | t3m_00198 | GC             |                                                                   | 0.68     |
| 2572231843 | t3m_00199 | COG_category   | [J] Translation, ribosomal structure and biogenesis               |          |
| 2572231843 | t3m_00199 | COG0293        | 23S rRNA methylase                                                | 4.00E-54 |
| 2572231843 | t3m_00199 | pfam01728      | FtsJ                                                              | 5.70E-49 |



|            |           |                |                                                               |          |
|------------|-----------|----------------|---------------------------------------------------------------|----------|
| 2572231843 | t3m_00199 | EC:2.1.1.166   | 23S rRNA (uridine(2552)-2'-O)-methyltransferase.              |          |
| 2572231843 | t3m_00199 | TIGR00438      | cell division protein FtsJ                                    | 1.60E-67 |
| 2572231843 | t3m_00199 | KO:K02427      | 23S rRNA (uridine2552-2'-O)-methyltransferase [EC:2.1.1.166]  | 1.40E-45 |
| 2572231843 | t3m_00199 | Locus_type     | CDS                                                           |          |
| 2572231843 | t3m_00199 | Product_name   | 23S rRNA methylase                                            |          |
| 2572231843 | t3m_00199 | Scaffold       | t3m_contig_70_28_len_67510_read_count_6030377.3               |          |
| 2572231843 | t3m_00199 | Coordinates    | 5507..6160(-)                                                 |          |
| 2572231843 | t3m_00199 | DNA_length     | 654bp                                                         |          |
| 2572231843 | t3m_00199 | Protein_length | 217aa                                                         |          |
| 2572231843 | t3m_00199 | GC             |                                                               | 0.71     |
| 2572231844 | t3m_00200 | Locus_type     | tRNA                                                          |          |
| 2572231844 | t3m_00200 | Product_name   | tRNA_Pro_GGG                                                  |          |
| 2572231844 | t3m_00200 | Scaffold       | t3m_contig_70_28_len_67510_read_count_6030377.3               |          |
| 2572231844 | t3m_00200 | Coordinates    | 6240..6314(-)                                                 |          |
| 2572231844 | t3m_00200 | DNA_length     | 75bp                                                          |          |
| 2572231844 | t3m_00200 | GC             |                                                               | 0.6      |
| 2572231845 | t3m_00201 | Locus_type     | CDS                                                           |          |
| 2572231845 | t3m_00201 | Product_name   | hypothetical protein                                          |          |
| 2572231845 | t3m_00201 | Scaffold       | t3m_contig_70_28_len_67510_read_count_6030377.3               |          |
| 2572231845 | t3m_00201 | Coordinates    | 6441..7157(-)                                                 |          |
| 2572231845 | t3m_00201 | DNA_length     | 717bp                                                         |          |
| 2572231845 | t3m_00201 | Protein_length | 238aa                                                         |          |
| 2572231845 | t3m_00201 | GC             |                                                               | 0.71     |
| 2572231846 | t3m_00202 | KEGG_module    | M00050: Guanine ribonucleotide biosynthesis IMP => GDP,GTP    |          |
| 2572231846 | t3m_00202 | Metacyc        | PWY-6596: adenosine nucleotides degradation I                 |          |
| 2572231846 | t3m_00202 | Metacyc        | PWY-841: purine nucleotides <i>de novo</i> biosynthesis II    |          |
| 2572231846 | t3m_00202 | Metacyc        | PWY-5695: urate biosynthesis/inosine 5'-phosphate degradation |          |
| 2572231846 | t3m_00202 | Metacyc        | PWY-6125: guanosine nucleotides <i>de novo</i> biosynthesis   |          |
| 2572231846 | t3m_00202 | COG_category   | [R] General function prediction only                          |          |
| 2572231846 | t3m_00202 | COG0517        | FOG: CBS domain                                               | 4.00E-13 |
| 2572231846 | t3m_00202 | pfam02195      | ParBc                                                         | 1.80E-08 |

|            |           |                |                                                                            |          |
|------------|-----------|----------------|----------------------------------------------------------------------------|----------|
| 2572231846 | t3m_00202 | pfam00571      | CBS                                                                        | 3.10E-07 |
| 2572231846 | t3m_00202 | pfam00571      | CBS                                                                        | 5.40E-12 |
| 2572231846 | t3m_00202 | EC:1.1.1.205   | IMP dehydrogenase.                                                         |          |
| 2572231846 | t3m_00202 | KO:K00088      | IMP dehydrogenase [EC:1.1.1.205]                                           | 0.00E+00 |
| 2572231846 | t3m_00202 | Locus_type     | CDS                                                                        |          |
| 2572231846 | t3m_00202 | Product_name   | FOG: CBS domain                                                            |          |
| 2572231846 | t3m_00202 | Scaffold       | t3m_contig_70_28_len_67510_read_count_6030377.3                            |          |
| 2572231846 | t3m_00202 | Coordinates    | 7279..8121(-)                                                              |          |
| 2572231846 | t3m_00202 | DNA_length     | 843bp                                                                      |          |
| 2572231846 | t3m_00202 | Protein_length | 280aa                                                                      |          |
| 2572231846 | t3m_00202 | GC             |                                                                            | 0.67     |
| 2572231847 | t3m_00203 | KEGG_module    | M00064: ADP-L-glycero-D-manno-heptose biosynthesis                         |          |
| 2572231847 | t3m_00203 | Metacyc        | PWY-6478: GDP-D-<i>glycero</i>-&alpha;-D-<i>manno</i>-heptose biosynthesis |          |
| 2572231847 | t3m_00203 | Metacyc        | PWY0-1241: ADP-L-<i>glycero</i>-&beta;-D-<i>manno</i>-heptose biosynthesis |          |
| 2572231847 | t3m_00203 | COG_category   | [G] Carbohydrate transport and metabolism                                  |          |
| 2572231847 | t3m_00203 | COG0279        | Phosphoheptose isomerase                                                   | 4.00E-29 |
| 2572231847 | t3m_00203 | pfam13580      | SIS_2                                                                      | 4.20E-23 |
| 2572231847 | t3m_00203 | EC:5.3.1.28    | D-sedoheptulose 7-phosphate isomerase.                                     |          |
| 2572231847 | t3m_00203 | KO:K03271      | D-sedoheptulose 7-phosphate isomerase [EC:5.3.1.28]                        | 8.50E-37 |
| 2572231847 | t3m_00203 | Locus_type     | CDS                                                                        |          |
| 2572231847 | t3m_00203 | Product_name   | Phosphoheptose isomerase                                                   |          |
| 2572231847 | t3m_00203 | Scaffold       | t3m_contig_70_28_len_67510_read_count_6030377.3                            |          |
| 2572231847 | t3m_00203 | Coordinates    | 8121..8723(-)                                                              |          |
| 2572231847 | t3m_00203 | DNA_length     | 603bp                                                                      |          |
| 2572231847 | t3m_00203 | Protein_length | 200aa                                                                      |          |
| 2572231847 | t3m_00203 | GC             |                                                                            | 0.68     |
| 2572231848 | t3m_00204 | Metacyc        | PWY-6478: GDP-D-<i>glycero</i>-&alpha;-D-<i>manno</i>-heptose biosynthesis |          |
| 2572231848 | t3m_00204 | COG_category   | [R] General function prediction only                                       |          |
| 2572231848 | t3m_00204 | COG2605        | Predicted kinase related to galactokinase and mevalonate kinase            | 9.00E-87 |
| 2572231848 | t3m_00204 | pfam08544      | GHMP_kinases_C                                                             | 6.60E-12 |
| 2572231848 | t3m_00204 | pfam00288      | GHMP_kinases_N                                                             | 2.10E-09 |
| 2572231848 | t3m_00204 | EC:2.7.1.168   | D-glycero-alpha-D-manno-heptose-7-phosphate kinase.                        |          |

|            |           |                |                                                                   |          |
|------------|-----------|----------------|-------------------------------------------------------------------|----------|
| 2572231848 | t3m_00204 | KO:K07031      | D-glycero-alpha-D-manno-heptose-7-phosphate kinase [EC:2.7.1.168] | 0.00E+00 |
| 2572231848 | t3m_00204 | Locus_type     | CDS                                                               |          |
| 2572231848 | t3m_00204 | Product_name   | Predicted kinase related to galactokinase and mevalonate kinase   |          |
| 2572231848 | t3m_00204 | Scaffold       | t3m_contig_70_28_len_67510_read_count_6030377.3                   |          |
| 2572231848 | t3m_00204 | Coordinates    | 8720..9697(-)                                                     |          |
| 2572231848 | t3m_00204 | DNA_length     | 978bp                                                             |          |
| 2572231848 | t3m_00204 | Protein_length | 325aa                                                             |          |
| 2572231848 | t3m_00204 | GC             |                                                                   | 0.68     |
| 2572231849 | t3m_00205 | KEGG_module    | M00290: Holo-TFIIH complex                                        |          |
| 2572231849 | t3m_00205 | COG_category   | [L] Replication, recombination and repair                         |          |
| 2572231849 | t3m_00205 | COG_category   | [K] Transcription                                                 |          |
| 2572231849 | t3m_00205 | COG1199        | Rad3-related DNA helicases                                        | 1.00E-70 |
| 2572231849 | t3m_00205 | pfam06733      | DEAD_2                                                            | 1.90E-25 |
| 2572231849 | t3m_00205 | pfam13307      | Helicase_C_2                                                      | 1.60E-32 |
| 2572231849 | t3m_00205 | EC:3.6.4.12    | DNA helicase.                                                     |          |
| 2572231849 | t3m_00205 | KO:K10844      | DNA excision repair protein ERCC-2 [EC:3.6.4.12]                  | 0.00E+00 |
| 2572231849 | t3m_00205 | Locus_type     | CDS                                                               |          |
| 2572231849 | t3m_00205 | Product_name   | Rad3-related DNA helicases                                        |          |
| 2572231849 | t3m_00205 | Scaffold       | t3m_contig_70_28_len_67510_read_count_6030377.3                   |          |
| 2572231849 | t3m_00205 | Coordinates    | 9723..11771(-)                                                    |          |
| 2572231849 | t3m_00205 | DNA_length     | 2049bp                                                            |          |
| 2572231849 | t3m_00205 | Protein_length | 682aa                                                             |          |
| 2572231849 | t3m_00205 | GC             |                                                                   | 0.7      |
| 2572231850 | t3m_00206 | COG_category   | [C] Energy production and conversion                              |          |
| 2572231850 | t3m_00206 | COG2440        | Ferredoxin-like protein                                           | 3.00E-19 |
| 2572231850 | t3m_00206 | KO:K03855      | ferredoxin like protein                                           | 7.60E-16 |
| 2572231850 | t3m_00206 | Locus_type     | CDS                                                               |          |
| 2572231850 | t3m_00206 | Product_name   | Ferredoxin-like protein                                           |          |
| 2572231850 | t3m_00206 | Scaffold       | t3m_contig_70_28_len_67510_read_count_6030377.3                   |          |
| 2572231850 | t3m_00206 | Coordinates    | 11936..12256(-)                                                   |          |
| 2572231850 | t3m_00206 | DNA_length     | 321bp                                                             |          |
| 2572231850 | t3m_00206 | Protein_length | 106aa                                                             |          |

2572231850 t3m\_00206 GC

0.69

|                      |             |                                                                                |
|----------------------|-------------|--------------------------------------------------------------------------------|
| 2572231851 t3m_00207 | KEGG_module | M00374: Dicarboxylate-hydroxybutyrate cycle                                    |
| 2572231851 t3m_00207 | KEGG_module | M00171: C4-dicarboxylic acid cycle, NAD+ -malic enzyme type                    |
| 2572231851 t3m_00207 | KEGG_module | M00009: Citrate cycle (TCA cycle, Krebs cycle)                                 |
| 2572231851 t3m_00207 | KEGG_module | M00173: Reductive citric acid cycle (Arnon-Buchanan cycle)                     |
| 2572231851 t3m_00207 | KEGG_module | M00346: Formaldehyde assimilation, serine pathway                              |
| 2572231851 t3m_00207 | KEGG_module | M00012: Glyoxylate cycle                                                       |
| 2572231851 t3m_00207 | KEGG_module | M00011: Citrate cycle, second carbon oxidation, 2-oxoglutarate => oxaloacetate |
| 2572231851 t3m_00207 | KEGG_module | M00168: CAM (Crassulacean acid metabolism), dark                               |
| 2572231851 t3m_00207 | Metacyc     | TCA: TCA cycle I (prokaryotic)                                                 |
| 2572231851 t3m_00207 | Metacyc     | PWY-6969: TCA cycle V (2-oxoglutarate:ferredoxin oxidoreductase)               |
| 2572231851 t3m_00207 | Metacyc     | ANARESP1-PWY: respiration (anaerobic)                                          |
| 2572231851 t3m_00207 | Metacyc     | PWY-5690: TCA cycle II (eukaryotic)                                            |
| 2572231851 t3m_00207 | Metacyc     | P42-PWY: incomplete reductive TCA cycle                                        |
| 2572231851 t3m_00207 | Metacyc     | FERMENTATION-PWY: mixed acid fermentation                                      |
| 2572231851 t3m_00207 | Metacyc     | GLUCONEO-PWY: gluconeogenesis I                                                |
| 2572231851 t3m_00207 | Metacyc     | PWY-6728: methylaspartate cycle                                                |
| 2572231851 t3m_00207 | Metacyc     | P108-PWY: pyruvate fermentation to propionate I                                |
| 2572231851 t3m_00207 | Metacyc     | MALATE-ASPARTATE-SHUTTLE-PWY: aspartate degradation II                         |
| 2572231851 t3m_00207 | Metacyc     | PWY-5392: reductive TCA cycle II                                               |
| 2572231851 t3m_00207 | Metacyc     | PWY-1622: formaldehyde assimilation I (serine pathway)                         |
| 2572231851 t3m_00207 | Metacyc     | PWY-561: superpathway of glyoxylate cycle and fatty acid degradation           |
| 2572231851 t3m_00207 | Metacyc     | P105-PWY: TCA cycle IV (2-oxoglutarate decarboxylase)                          |
| 2572231851 t3m_00207 | Metacyc     | PWY-5913: TCA cycle VI (obligate autotrophs)                                   |
| 2572231851 t3m_00207 | Metacyc     | P23-PWY: reductive TCA cycle I                                                 |
| 2572231851 t3m_00207 | Metacyc     | GLYOXYLATE-BYPASS: glyoxylate cycle                                            |
| 2572231851 t3m_00207 | Metacyc     | PWY-7115: C4 photosynthetic carbon assimilation cycle, NAD-ME type             |
| 2572231851 t3m_00207 | IMG_pathway | 1014: Dicarboxylate/4-hydroxybutyrate cycle                                    |
| 2572231851 t3m_00207 | IMG_pathway | 308: 2-oxoglutarate synthesis by partial reverse TCA cycle                     |
| 2572231851 t3m_00207 | IMG_pathway | 334: Tricarboxylic acid cycle                                                  |
| 2572231851 t3m_00207 | IMG_pathway | 335: Acetyl-CoA synthesis by reverse TCA cycle                                 |
| 2572231851 t3m_00207 | IMG_pathway | 370: Oxaloacetate conversion to propionate via methylmalonyl-CoA               |
| 2572231851 t3m_00207 | IMG_pathway | 911: Acetyl-CoA assimilation via glyoxylate cycle                              |

|            |           |                |                                                            |           |
|------------|-----------|----------------|------------------------------------------------------------|-----------|
| 2572231851 | t3m_00207 | IMG_pathway    | 913: Acetyl-CoA assimilation via methylaspartate cycle     |           |
| 2572231851 | t3m_00207 | IMG_pathway    | 959: Serine cycle                                          |           |
| 2572231851 | t3m_00207 | IMG_pathway    | 960: Glyoxalate from acetyl-CoA via isocitrate lyase cycle |           |
| 2572231851 | t3m_00207 | COG_category   | [C] Energy production and conversion                       |           |
| 2572231851 | t3m_00207 | COG0039        | Malate/lactate dehydrogenases                              | 3.00E-92  |
| 2572231851 | t3m_00207 | pfam02866      | Ldh_1_C                                                    | 2.50E-28  |
| 2572231851 | t3m_00207 | pfam00056      | Ldh_1_N                                                    | 3.00E-39  |
| 2572231851 | t3m_00207 | EC:1.1.1.37    | Malate dehydrogenase.                                      |           |
| 2572231851 | t3m_00207 | TIGR01763      | malate dehydrogenase, NAD-dependent                        | 3.60E-118 |
| 2572231851 | t3m_00207 | KO:K00024      | malate dehydrogenase [EC:1.1.1.37]                         | 0.00E+00  |
| 2572231851 | t3m_00207 | ITERM:01345    | malate dehydrogenase (NAD) (EC 1.1.1.37)                   |           |
| 2572231851 | t3m_00207 | Locus_type     | CDS                                                        |           |
| 2572231851 | t3m_00207 | Product_name   | malate dehydrogenase (NAD) (EC 1.1.1.37)                   |           |
| 2572231851 | t3m_00207 | Scaffold       | t3m_contig_70_28_len_67510_read_count_6030377.3            |           |
| 2572231851 | t3m_00207 | Coordinates    | 12271..13215(-)                                            |           |
| 2572231851 | t3m_00207 | DNA_length     | 945bp                                                      |           |
| 2572231851 | t3m_00207 | Protein_length | 314aa                                                      |           |
| 2572231851 | t3m_00207 | GC             |                                                            | 0.69      |
|            |           |                |                                                            |           |
| 2572231852 | t3m_00208 | Locus_type     | CDS                                                        |           |
| 2572231852 | t3m_00208 | Product_name   | hypothetical protein                                       |           |
| 2572231852 | t3m_00208 | Scaffold       | t3m_contig_70_28_len_67510_read_count_6030377.3            |           |
| 2572231852 | t3m_00208 | Coordinates    | 13326..13562(+)                                            |           |
| 2572231852 | t3m_00208 | DNA_length     | 237bp                                                      |           |
| 2572231852 | t3m_00208 | Protein_length | 78aa                                                       |           |
| 2572231852 | t3m_00208 | GC             |                                                            | 0.66      |
|            |           |                |                                                            |           |
| 2572231853 | t3m_00209 | Locus_type     | CDS                                                        |           |
| 2572231853 | t3m_00209 | Product_name   | hypothetical protein                                       |           |
| 2572231853 | t3m_00209 | Scaffold       | t3m_contig_70_28_len_67510_read_count_6030377.3            |           |
| 2572231853 | t3m_00209 | Coordinates    | 13534..13758(+)                                            |           |
| 2572231853 | t3m_00209 | DNA_length     | 225bp                                                      |           |
| 2572231853 | t3m_00209 | Protein_length | 74aa                                                       |           |
| 2572231853 | t3m_00209 | GC             |                                                            | 0.68      |

|            |           |                |                                                                            |          |
|------------|-----------|----------------|----------------------------------------------------------------------------|----------|
| 2572231854 | t3m_00210 | KEGG_module    | M00119: Pantothenate biosynthesis, valine/L-aspartate => pantothenate      |          |
| 2572231854 | t3m_00210 | Metacyc        | PWY-6654: phosphopantothenate biosynthesis III                             |          |
| 2572231854 | t3m_00210 | Metacyc        | PANTO-PWY: phosphopantothenate biosynthesis I                              |          |
| 2572231854 | t3m_00210 | COG_category   | [H] Coenzyme transport and metabolism                                      |          |
| 2572231854 | t3m_00210 | COG1893        | Ketopantoate reductase                                                     | 2.00E-53 |
| 2572231854 | t3m_00210 | pfam02558      | ApbA                                                                       | 1.30E-26 |
| 2572231854 | t3m_00210 | pfam08546      | ApbA_C                                                                     | 1.50E-31 |
| 2572231854 | t3m_00210 | EC:1.1.1.169   | 2-dehydropantoate 2-reductase.                                             |          |
| 2572231854 | t3m_00210 | TIGR00745      | 2-dehydropantoate 2-reductase                                              | 2.70E-70 |
| 2572231854 | t3m_00210 | KO:K00077      | 2-dehydropantoate 2-reductase [EC:1.1.1.169]                               | 1.40E-39 |
| 2572231854 | t3m_00210 | Locus_type     | CDS                                                                        |          |
| 2572231854 | t3m_00210 | Product_name   | 2-dehydropantoate 2-reductase                                              |          |
| 2572231854 | t3m_00210 | Scaffold       | t3m_contig_70_28_len_67510_read_count_6030377.3                            |          |
| 2572231854 | t3m_00210 | Coordinates    | 13787..14722(+)                                                            |          |
| 2572231854 | t3m_00210 | DNA_length     | 936bp                                                                      |          |
| 2572231854 | t3m_00210 | Protein_length | 311aa                                                                      |          |
| 2572231854 | t3m_00210 | GC             |                                                                            | 0.72     |
|            |           |                |                                                                            |          |
| 2572231855 | t3m_00211 | KEGG_module    | M00003: Gluconeogenesis, oxaloacetate => fructose-6P                       |          |
| 2572231855 | t3m_00211 | KEGG_module    | M00001: Glycolysis (Embden-Meyerhof pathway), glucose => pyruvate          |          |
| 2572231855 | t3m_00211 | KEGG_module    | M00165: Reductive pentose phosphate cycle (Calvin cycle)                   |          |
| 2572231855 | t3m_00211 | KEGG_module    | M00166: Reductive pentose phosphate cycle, RuBP + CO2 => glyceraldehyde-3P |          |
| 2572231855 | t3m_00211 | KEGG_module    | M00002: Glycolysis, core module involving three-carbon compounds           |          |
| 2572231855 | t3m_00211 | Metacyc        | PWY-6901: xylose degradation IV                                            |          |
| 2572231855 | t3m_00211 | Metacyc        | GLUCONEO-PWY: gluconeogenesis I                                            |          |
| 2572231855 | t3m_00211 | Metacyc        | PWY-7003: glycerol degradation to butanol                                  |          |
| 2572231855 | t3m_00211 | Metacyc        | PWY-1042: glycolysis IV (plant cytosol)                                    |          |
| 2572231855 | t3m_00211 | Metacyc        | P185-PWY: formaldehyde assimilation III (dihydroxyacetone cycle)           |          |
| 2572231855 | t3m_00211 | Metacyc        | ANAGLYCOLYSIS-PWY: glycolysis III (glucokinase)                            |          |
| 2572231855 | t3m_00211 | Metacyc        | P124-PWY: Bifidobacterium shunt                                            |          |
| 2572231855 | t3m_00211 | Metacyc        | SUCSYN-PWY: sucrose biosynthesis                                           |          |
| 2572231855 | t3m_00211 | Metacyc        | GLYCOLYSIS: glycolysis I                                                   |          |
| 2572231855 | t3m_00211 | Metacyc        | P122-PWY: heterolactic fermentation                                        |          |

|            |           |                |                                                                   |           |
|------------|-----------|----------------|-------------------------------------------------------------------|-----------|
| 2572231855 | t3m_00211 | Metacyc        | PWY-6886: 1-butanol autotrophic biosynthesis                      |           |
| 2572231855 | t3m_00211 | Metacyc        | PWY-5484: glycolysis II (from fructose-6P)                        |           |
| 2572231855 | t3m_00211 | Metacyc        | CALVIN-PWY: Calvin-Benson-Bassham cycle                           |           |
| 2572231855 | t3m_00211 | IMG_pathway    | 336: Standard Embden-Meyerhof pathway                             |           |
| 2572231855 | t3m_00211 | IMG_pathway    | 359: Conversion of glyceraldehyde-3-phosphate to pyruvate         |           |
| 2572231855 | t3m_00211 | IMG_pathway    | 527: Calvin cycle                                                 |           |
| 2572231855 | t3m_00211 | COG_category   | [G] Carbohydrate transport and metabolism                         |           |
| 2572231855 | t3m_00211 | COG0126        | 3-phosphoglycerate kinase                                         | 1.00E-113 |
| 2572231855 | t3m_00211 | pfam00162      | PGK                                                               | 6.40E-123 |
| 2572231855 | t3m_00211 | EC:2.7.2.3     | Phosphoglycerate kinase.                                          |           |
| 2572231855 | t3m_00211 | KO:K00927      | phosphoglycerate kinase [EC:2.7.2.3]                              | 0.00E+00  |
| 2572231855 | t3m_00211 | ITERM:01477    | phosphoglycerate kinase (EC 2.7.2.3)                              |           |
| 2572231855 | t3m_00211 | Locus_type     | CDS                                                               |           |
| 2572231855 | t3m_00211 | Product_name   | phosphoglycerate kinase (EC 2.7.2.3)                              |           |
| 2572231855 | t3m_00211 | Scaffold       | t3m_contig_70_28_len_67510_read_count_6030377.3                   |           |
| 2572231855 | t3m_00211 | Coordinates    | 14747..15928(+)                                                   |           |
| 2572231855 | t3m_00211 | DNA_length     | 1182bp                                                            |           |
| 2572231855 | t3m_00211 | Protein_length | 393aa                                                             |           |
| 2572231855 | t3m_00211 | GC             |                                                                   | 0.71      |
| 2572231856 | t3m_00212 | COG_category   | [P] Inorganic ion transport and metabolism                        |           |
| 2572231856 | t3m_00212 | COG1324        | Uncharacterized protein involved in tolerance to divalent cations | 9.00E-19  |
| 2572231856 | t3m_00212 | pfam03091      | CutA1                                                             | 5.50E-22  |
| 2572231856 | t3m_00212 | KO:K03926      | periplasmic divalent cation tolerance protein                     | 1.00E-13  |
| 2572231856 | t3m_00212 | Locus_type     | CDS                                                               |           |
| 2572231856 | t3m_00212 | Product_name   | Uncharacterized protein involved in tolerance to divalent cations |           |
| 2572231856 | t3m_00212 | Scaffold       | t3m_contig_70_28_len_67510_read_count_6030377.3                   |           |
| 2572231856 | t3m_00212 | Coordinates    | 15846..16265(-)                                                   |           |
| 2572231856 | t3m_00212 | DNA_length     | 420bp                                                             |           |
| 2572231856 | t3m_00212 | Protein_length | 139aa                                                             |           |
| 2572231856 | t3m_00212 | GC             |                                                                   | 0.72      |
| 2572231857 | t3m_00213 | KEGG_module    | M00264: DNA polymerase II complex, archaea                        |           |
| 2572231857 | t3m_00213 | COG_category   | [L] Replication, recombination and repair                         |           |

|            |           |                |                                                                      |          |
|------------|-----------|----------------|----------------------------------------------------------------------|----------|
| 2572231857 | t3m_00213 | COG1311        | Archaeal DNA polymerase II, small subunit/DNA polymerase delta, subu | 1.00E-89 |
| 2572231857 | t3m_00213 | pfam04042      | DNA_pol_E_B                                                          | 1.80E-15 |
| 2572231857 | t3m_00213 | EC:2.7.7.7     | DNA-directed DNA polymerase.                                         |          |
| 2572231857 | t3m_00213 | KO:K02323      | DNA polymerase II small subunit [EC:2.7.7.7]                         | 0.00E+00 |
| 2572231857 | t3m_00213 | Locus_type     | CDS                                                                  |          |
| 2572231857 | t3m_00213 | Product_name   | Archaeal DNA polymerase II, small subunit/DNA polymerase delta, subu |          |
| 2572231857 | t3m_00213 | Scaffold       | t3m_contig_70_28_len_67510_read_count_6030377.3                      |          |
| 2572231857 | t3m_00213 | Coordinates    | 16304..17815(-)                                                      |          |
| 2572231857 | t3m_00213 | DNA_length     | 1512bp                                                               |          |
| 2572231857 | t3m_00213 | Protein_length | 503aa                                                                |          |
| 2572231857 | t3m_00213 | GC             |                                                                      | 0.71     |
| 2572231858 | t3m_00214 | Locus_type     | CDS                                                                  |          |
| 2572231858 | t3m_00214 | Product_name   | hypothetical protein                                                 |          |
| 2572231858 | t3m_00214 | Scaffold       | t3m_contig_70_28_len_67510_read_count_6030377.3                      |          |
| 2572231858 | t3m_00214 | Coordinates    | 17947..18597(-)                                                      |          |
| 2572231858 | t3m_00214 | DNA_length     | 651bp                                                                |          |
| 2572231858 | t3m_00214 | Protein_length | 216aa                                                                |          |
| 2572231858 | t3m_00214 | GC             |                                                                      | 0.65     |
| 2572231859 | t3m_00215 | COG_category   | [L] Replication, recombination and repair                            |          |
| 2572231859 | t3m_00215 | COG0358        | DNA primase (bacterial type)                                         | 7.00E-40 |
| 2572231859 | t3m_00215 | pfam13662      | Toprim_4                                                             | 1.40E-09 |
| 2572231859 | t3m_00215 | Locus_type     | CDS                                                                  |          |
| 2572231859 | t3m_00215 | Product_name   | DNA primase (bacterial type)                                         |          |
| 2572231859 | t3m_00215 | Scaffold       | t3m_contig_70_28_len_67510_read_count_6030377.3                      |          |
| 2572231859 | t3m_00215 | Coordinates    | 18965..20317(+)                                                      |          |
| 2572231859 | t3m_00215 | DNA_length     | 1353bp                                                               |          |
| 2572231859 | t3m_00215 | Protein_length | 450aa                                                                |          |
| 2572231859 | t3m_00215 | GC             |                                                                      | 0.68     |
| 2572231860 | t3m_00216 | pfam13654      | AAA_32                                                               | 4.80E-07 |
| 2572231860 | t3m_00216 | pfam01078      | Mg_chelatase                                                         | 3.10E-08 |
| 2572231860 | t3m_00216 | EC:3.4.21.53   | Endopeptidase La.                                                    |          |



|            |           |                |                                                                         |          |
|------------|-----------|----------------|-------------------------------------------------------------------------|----------|
| 2572231860 | t3m_00216 | TIGR00764      | lon-related putative ATP-dependent protease                             | 2.10E-88 |
| 2572231860 | t3m_00216 | KO:K01338      | ATP-dependent Lon protease [EC:3.4.21.53]                               | 0.00E+00 |
| 2572231860 | t3m_00216 | Locus_type     | CDS                                                                     |          |
| 2572231860 | t3m_00216 | Product_name   | AAA domain/Magnesium chelatase, subunit ChII                            |          |
| 2572231860 | t3m_00216 | Scaffold       | t3m_contig_70_28_len_67510_read_count_6030377.3                         |          |
| 2572231860 | t3m_00216 | Coordinates    | 20402..21949(+)                                                         |          |
| 2572231860 | t3m_00216 | DNA_length     | 1548bp                                                                  |          |
| 2572231860 | t3m_00216 | Protein_length | 515aa                                                                   |          |
| 2572231860 | t3m_00216 | GC             |                                                                         | 0.7      |
| 2572231861 | t3m_00217 | Locus_type     | tRNA                                                                    |          |
| 2572231861 | t3m_00217 | Product_name   | tRNA_Val_GAC                                                            |          |
| 2572231861 | t3m_00217 | Scaffold       | t3m_contig_70_28_len_67510_read_count_6030377.3                         |          |
| 2572231861 | t3m_00217 | Coordinates    | 21998..22070(+)                                                         |          |
| 2572231861 | t3m_00217 | DNA_length     | 73bp                                                                    |          |
| 2572231861 | t3m_00217 | GC             |                                                                         | 0.62     |
| 2572231862 | t3m_00218 | COG_category   | [R] General function prediction only                                    |          |
| 2572231862 | t3m_00218 | COG1881        | Phospholipid-binding protein                                            | 9.00E-39 |
| 2572231862 | t3m_00218 | pfam01161      | PBP                                                                     | 3.60E-34 |
| 2572231862 | t3m_00218 | TIGR00481      | Raf kinase inhibitor-like protein, YbhB/Ybcl family                     | 3.70E-37 |
| 2572231862 | t3m_00218 | Locus_type     | CDS                                                                     |          |
| 2572231862 | t3m_00218 | Product_name   | phospholipid-binding protein, PBP family                                |          |
| 2572231862 | t3m_00218 | Scaffold       | t3m_contig_70_28_len_67510_read_count_6030377.3                         |          |
| 2572231862 | t3m_00218 | Coordinates    | 22261..22725(-)                                                         |          |
| 2572231862 | t3m_00218 | DNA_length     | 465bp                                                                   |          |
| 2572231862 | t3m_00218 | Protein_length | 154aa                                                                   |          |
| 2572231862 | t3m_00218 | GC             |                                                                         | 0.66     |
| 2572231863 | t3m_00219 | COG_category   | [K] Transcription                                                       |          |
| 2572231863 | t3m_00219 | COG1321        | Mn-dependent transcriptional regulator                                  | 6.00E-15 |
| 2572231863 | t3m_00219 | pfam02742      | Fe_dep_repr_C                                                           | 3.20E-12 |
| 2572231863 | t3m_00219 | pfam01726      | LexA_DNA_bind                                                           | 2.40E-06 |
| 2572231863 | t3m_00219 | KO:K03709      | DtxR family transcriptional regulator, Mn-dependent transcriptional reg | 1.50E-12 |

|            |           |                |                                                                      |          |  |
|------------|-----------|----------------|----------------------------------------------------------------------|----------|--|
| 2572231863 | t3m_00219 | ITERM:02272    | iron (metal) dependent repressor, DtxR family                        |          |  |
| 2572231863 | t3m_00219 | Locus_type     | CDS                                                                  |          |  |
| 2572231863 | t3m_00219 | Product_name   | iron (metal) dependent repressor, DtxR family                        |          |  |
| 2572231863 | t3m_00219 | Scaffold       | t3m_contig_70_28_len_67510_read_count_6030377.3                      |          |  |
| 2572231863 | t3m_00219 | Coordinates    | 22960..23391(+)                                                      |          |  |
| 2572231863 | t3m_00219 | DNA_length     | 432bp                                                                |          |  |
| 2572231863 | t3m_00219 | Protein_length | 143aa                                                                |          |  |
| 2572231863 | t3m_00219 | GC             |                                                                      | 0.68     |  |
| 2572231864 | t3m_00220 | KEGG_module    | M00244: Putative zinc/manganese transport system                     |          |  |
| 2572231864 | t3m_00220 | COG_category   | [P] Inorganic ion transport and metabolism                           |          |  |
| 2572231864 | t3m_00220 | COG0803        | ABC-type metal ion transport system, periplasmic component/surface a | 3.00E-28 |  |
| 2572231864 | t3m_00220 | pfam01297      | TroA                                                                 | 1.40E-36 |  |
| 2572231864 | t3m_00220 | KO:K02077      | zinc/manganese transport system substrate-binding protein            | 0.00E+00 |  |
| 2572231864 | t3m_00220 | Locus_type     | CDS                                                                  |          |  |
| 2572231864 | t3m_00220 | Product_name   | ABC-type metal ion transport system, periplasmic component/surface a |          |  |
| 2572231864 | t3m_00220 | Scaffold       | t3m_contig_70_28_len_67510_read_count_6030377.3                      |          |  |
| 2572231864 | t3m_00220 | Coordinates    | 23428..24498(+)                                                      |          |  |
| 2572231864 | t3m_00220 | DNA_length     | 1071bp                                                               |          |  |
| 2572231864 | t3m_00220 | Protein_length | 356aa                                                                |          |  |
| 2572231864 | t3m_00220 | GC             |                                                                      | 0.64     |  |
| 2572231864 | t3m_00220 | Transmembrane  | Yes                                                                  |          |  |
| 2572231865 | t3m_00221 | KEGG_module    | M00244: Putative zinc/manganese transport system                     |          |  |
| 2572231865 | t3m_00221 | COG_category   | [P] Inorganic ion transport and metabolism                           |          |  |
| 2572231865 | t3m_00221 | COG1121        | ABC-type Mn/Zn transport systems, ATPase component                   | 1.00E-56 |  |
| 2572231865 | t3m_00221 | pfam00005      | ABC_tran                                                             | 7.40E-27 |  |
| 2572231865 | t3m_00221 | KO:K02074      | zinc/manganese transport system ATP-binding protein                  | 0.00E+00 |  |
| 2572231865 | t3m_00221 | Locus_type     | CDS                                                                  |          |  |
| 2572231865 | t3m_00221 | Product_name   | ABC-type Mn/Zn transport systems, ATPase component                   |          |  |
| 2572231865 | t3m_00221 | Scaffold       | t3m_contig_70_28_len_67510_read_count_6030377.3                      |          |  |
| 2572231865 | t3m_00221 | Coordinates    | 24505..25332(+)                                                      |          |  |
| 2572231865 | t3m_00221 | DNA_length     | 828bp                                                                |          |  |
| 2572231865 | t3m_00221 | Protein_length | 275aa                                                                |          |  |

|            |           |                |                                                                                    |          |
|------------|-----------|----------------|------------------------------------------------------------------------------------|----------|
| 2572231865 | t3m_00221 | GC             |                                                                                    | 0.66     |
| 2572231866 | t3m_00222 | KEGG_module    | M00244: Putative zinc/manganese transport system                                   |          |
| 2572231866 | t3m_00222 | COG_category   | [P] Inorganic ion transport and metabolism                                         |          |
| 2572231866 | t3m_00222 | COG1108        | ABC-type Mn <sup>2+</sup> /Zn <sup>2+</sup> transport systems, permease components | 2.00E-34 |
| 2572231866 | t3m_00222 | pfam00950      | ABC-3                                                                              | 8.30E-54 |
| 2572231866 | t3m_00222 | KO:K02075      | zinc/manganese transport system permease protein                                   | 0.00E+00 |
| 2572231866 | t3m_00222 | Locus_type     | CDS                                                                                |          |
| 2572231866 | t3m_00222 | Product_name   | ABC-type Mn <sup>2+</sup> /Zn <sup>2+</sup> transport systems, permease components |          |
| 2572231866 | t3m_00222 | Scaffold       | t3m_contig_70_28_len_67510_read_count_6030377.3                                    |          |
| 2572231866 | t3m_00222 | Coordinates    | 25329..26237(+)                                                                    |          |
| 2572231866 | t3m_00222 | DNA_length     | 909bp                                                                              |          |
| 2572231866 | t3m_00222 | Protein_length | 302aa                                                                              |          |
| 2572231866 | t3m_00222 | GC             |                                                                                    | 0.65     |
| 2572231866 | t3m_00222 | Transmembrane  | Yes                                                                                |          |
| 2572231867 | t3m_00223 | Metacyc        | PWY-4722: creatinine degradation II                                                |          |
| 2572231867 | t3m_00223 | Metacyc        | PWY-3661: glycine betaine degradation                                              |          |
| 2572231867 | t3m_00223 | Metacyc        | CRNFORCAT-PWY: creatinine degradation I                                            |          |
| 2572231867 | t3m_00223 | COG_category   | [E] Amino acid transport and metabolism                                            |          |
| 2572231867 | t3m_00223 | COG0665        | Glycine/D-amino acid oxidases (deaminating)                                        | 2.00E-42 |
| 2572231867 | t3m_00223 | pfam01266      | DAO                                                                                | 2.60E-66 |
| 2572231867 | t3m_00223 | EC:1.5.3.1     | Sarcosine oxidase.                                                                 |          |
| 2572231867 | t3m_00223 | KO:K00303      | sarcosine oxidase, subunit beta [EC:1.5.3.1]                                       | 0.00E+00 |
| 2572231867 | t3m_00223 | Locus_type     | CDS                                                                                |          |
| 2572231867 | t3m_00223 | Product_name   | Glycine/D-amino acid oxidases (deaminating)                                        |          |
| 2572231867 | t3m_00223 | Scaffold       | t3m_contig_70_28_len_67510_read_count_6030377.3                                    |          |
| 2572231867 | t3m_00223 | Coordinates    | 26262..27434(-)                                                                    |          |
| 2572231867 | t3m_00223 | DNA_length     | 1173bp                                                                             |          |
| 2572231867 | t3m_00223 | Protein_length | 390aa                                                                              |          |
| 2572231867 | t3m_00223 | GC             |                                                                                    | 0.65     |
| 2572231868 | t3m_00224 | COG_category   | [O] Posttranslational modification, protein turnover, chaperones                   |          |
| 2572231868 | t3m_00224 | COG0492        | Thioredoxin reductase                                                              | 4.00E-14 |

|            |           |                |                                                             |                                                             |          |
|------------|-----------|----------------|-------------------------------------------------------------|-------------------------------------------------------------|----------|
| 2572231868 | t3m_00224 | pfam04324      | Fer2_BFD                                                    |                                                             | 9.90E-06 |
| 2572231868 | t3m_00224 | pfam01494      | FAD_binding_3                                               |                                                             | 1.90E-06 |
| 2572231868 | t3m_00224 | pfam13510      | Fer2_4                                                      |                                                             | 3.00E-18 |
| 2572231868 | t3m_00224 | Locus_type     |                                                             | CDS                                                         |          |
| 2572231868 | t3m_00224 | Product_name   |                                                             | Thioredoxin reductase                                       |          |
| 2572231868 | t3m_00224 | Scaffold       |                                                             | t3m_contig_70_28_len_67510_read_count_6030377.3             |          |
| 2572231868 | t3m_00224 | Coordinates    |                                                             | 27412..29505(-)                                             |          |
| 2572231868 | t3m_00224 | DNA_length     |                                                             | 2094bp                                                      |          |
| 2572231868 | t3m_00224 | Protein_length |                                                             | 697aa                                                       |          |
| 2572231868 | t3m_00224 | GC             |                                                             |                                                             | 0.66     |
| 2572231869 | t3m_00225 | Metacyc        | HYDROXYPRODEG-PWY: 4-hydroxyproline degradation I           |                                                             |          |
| 2572231869 | t3m_00225 | IMG_pathway    | 181: L-proline oxidation to L-glutamate                     |                                                             |          |
| 2572231869 | t3m_00225 | COG_category   | [C] Energy production and conversion                        |                                                             |          |
| 2572231869 | t3m_00225 | COG1012        | NAD-dependent aldehyde dehydrogenases                       |                                                             | 1.00E-78 |
| 2572231869 | t3m_00225 | pfam00171      | Aldedh                                                      |                                                             | 3.70E-89 |
| 2572231869 | t3m_00225 | EC:1.5.1.12    | 1-pyrroline-5-carboxylate dehydrogenase.                    |                                                             |          |
| 2572231869 | t3m_00225 | TIGR01236      | delta-1-pyrroline-5-carboxylate dehydrogenase, group 1      |                                                             | 0.00E+00 |
| 2572231869 | t3m_00225 | KO:K00294      | 1-pyrroline-5-carboxylate dehydrogenase [EC:1.5.1.12]       |                                                             | 0.00E+00 |
| 2572231869 | t3m_00225 | ITERM:00471    | delta-1-pyrroline-5-carboxylate dehydrogenase (EC 1.5.1.12) |                                                             |          |
| 2572231869 | t3m_00225 | Locus_type     |                                                             | CDS                                                         |          |
| 2572231869 | t3m_00225 | Product_name   |                                                             | delta-1-pyrroline-5-carboxylate dehydrogenase (EC 1.5.1.12) |          |
| 2572231869 | t3m_00225 | Scaffold       |                                                             | t3m_contig_70_28_len_67510_read_count_6030377.3             |          |
| 2572231869 | t3m_00225 | Coordinates    |                                                             | 29606..31225(+)                                             |          |
| 2572231869 | t3m_00225 | DNA_length     |                                                             | 1620bp                                                      |          |
| 2572231869 | t3m_00225 | Protein_length |                                                             | 539aa                                                       |          |
| 2572231869 | t3m_00225 | GC             |                                                             |                                                             | 0.65     |
| 2572231870 | t3m_00226 | COG_category   | [S] Function unknown                                        |                                                             |          |
| 2572231870 | t3m_00226 | COG3462        | Predicted membrane protein                                  |                                                             | 7.00E-06 |
| 2572231870 | t3m_00226 | pfam09851      | SHOCT                                                       |                                                             | 2.00E-05 |
| 2572231870 | t3m_00226 | Locus_type     |                                                             | CDS                                                         |          |
| 2572231870 | t3m_00226 | Product_name   |                                                             | Predicted membrane protein                                  |          |
| 2572231870 | t3m_00226 | Scaffold       |                                                             | t3m_contig_70_28_len_67510_read_count_6030377.3             |          |

|            |           |                |                                                         |           |
|------------|-----------|----------------|---------------------------------------------------------|-----------|
| 2572231870 | t3m_00226 | Coordinates    | 31272..31700(-)                                         |           |
| 2572231870 | t3m_00226 | DNA_length     | 429bp                                                   |           |
| 2572231870 | t3m_00226 | Protein_length | 142aa                                                   |           |
| 2572231870 | t3m_00226 | GC             |                                                         | 0.66      |
| 2572231870 | t3m_00226 | Transmembrane  | Yes                                                     |           |
| 2572231871 | t3m_00227 | KEGG_module    | M00357: Methanogenesis, acetate => methane              |           |
| 2572231871 | t3m_00227 | Metacyc        | PWY66-162: ethanol degradation IV                       |           |
| 2572231871 | t3m_00227 | Metacyc        | PWY-6672: <i>cis</i>-genanyl-CoA degradation            |           |
| 2572231871 | t3m_00227 | Metacyc        | PWY0-1313: acetate conversion to acetyl-CoA             |           |
| 2572231871 | t3m_00227 | Metacyc        | PWY66-21: ethanol degradation II                        |           |
| 2572231871 | t3m_00227 | Metacyc        | PWY66-161: oxidative ethanol degradation III            |           |
| 2572231871 | t3m_00227 | Metacyc        | GLUDEG-II-PWY: glutamate degradation VII (to butanoate) |           |
| 2572231871 | t3m_00227 | COG_category   | [I] Lipid transport and metabolism                      |           |
| 2572231871 | t3m_00227 | COG0365        | Acyl-coenzyme A synthetases/AMP-(fatty) acid ligases    | 1.00E-123 |
| 2572231871 | t3m_00227 | pfam13193      | AMP-binding_C                                           | 6.60E-18  |
| 2572231871 | t3m_00227 | pfam00501      | AMP-binding                                             | 1.10E-77  |
| 2572231871 | t3m_00227 | EC:6.2.1.1     | Acetate--CoA ligase.                                    |           |
| 2572231871 | t3m_00227 | KO:K01895      | acetyl-CoA synthetase [EC:6.2.1.1]                      | 0.00E+00  |
| 2572231871 | t3m_00227 | Locus_type     | CDS                                                     |           |
| 2572231871 | t3m_00227 | Product_name   | Acyl-coenzyme A synthetases/AMP-(fatty) acid ligases    |           |
| 2572231871 | t3m_00227 | Scaffold       | t3m_contig_70_28_len_67510_read_count_6030377.3         |           |
| 2572231871 | t3m_00227 | Coordinates    | 31770..33512(-)                                         |           |
| 2572231871 | t3m_00227 | DNA_length     | 1743bp                                                  |           |
| 2572231871 | t3m_00227 | Protein_length | 580aa                                                   |           |
| 2572231871 | t3m_00227 | GC             |                                                         | 0.67      |
| 2572231872 | t3m_00228 | Locus_type     | CDS                                                     |           |
| 2572231872 | t3m_00228 | Product_name   | hypothetical protein                                    |           |
| 2572231872 | t3m_00228 | Scaffold       | t3m_contig_70_28_len_67510_read_count_6030377.3         |           |
| 2572231872 | t3m_00228 | Coordinates    | 33587..33985(-)                                         |           |
| 2572231872 | t3m_00228 | DNA_length     | 399bp                                                   |           |
| 2572231872 | t3m_00228 | Protein_length | 132aa                                                   |           |
| 2572231872 | t3m_00228 | GC             |                                                         | 0.63      |

|            |           |                |                                                                                |          |
|------------|-----------|----------------|--------------------------------------------------------------------------------|----------|
| 2572231872 | t3m_00228 | Transmembrane  | Yes                                                                            |          |
| 2572231873 | t3m_00229 | KEGG_module    | M00527: Lysine biosynthesis, DAP aminotransferase pathway, aspartate => lysine |          |
| 2572231873 | t3m_00229 | KEGG_module    | M00016: Lysine biosynthesis, succinyl-DAP pathway, aspartate => lysine         |          |
| 2572231873 | t3m_00229 | KEGG_module    | M00526: Lysine biosynthesis, DAP dehydrogenase pathway, aspartate => lysine    |          |
| 2572231873 | t3m_00229 | KEGG_module    | M00525: Lysine biosynthesis, acetyl-DAP pathway, aspartate => lysine           |          |
| 2572231873 | t3m_00229 | Metacyc        | PWY-2942: lysine biosynthesis III                                              |          |
| 2572231873 | t3m_00229 | Metacyc        | DAPLYSINESYN-PWY: lysine biosynthesis I                                        |          |
| 2572231873 | t3m_00229 | Metacyc        | PWY-2941: lysine biosynthesis II                                               |          |
| 2572231873 | t3m_00229 | Metacyc        | PWY-5097: lysine biosynthesis VI                                               |          |
| 2572231873 | t3m_00229 | COG_category   | [M] Cell wall/membrane/envelope biogenesis                                     |          |
| 2572231873 | t3m_00229 | COG_category   | [E] Amino acid transport and metabolism                                        |          |
| 2572231873 | t3m_00229 | COG0329        | Dihydrodipicolinate synthase/N-acetylneuraminate lyase                         | 1.00E-40 |
| 2572231873 | t3m_00229 | pfam00701      | DHDPS                                                                          | 3.70E-31 |
| 2572231873 | t3m_00229 | EC:4.3.3.7     | 4-hydroxy-tetrahydrodipicolinate synthase.                                     |          |
| 2572231873 | t3m_00229 | KO:K01714      | 4-hydroxy-tetrahydrodipicolinate synthase [EC:4.3.3.7]                         | 3.50E-40 |
| 2572231873 | t3m_00229 | Locus_type     | CDS                                                                            |          |
| 2572231873 | t3m_00229 | Product_name   | Dihydrodipicolinate synthase/N-acetylneuraminate lyase                         |          |
| 2572231873 | t3m_00229 | Scaffold       | t3m_contig_70_28_len_67510_read_count_6030377.3                                |          |
| 2572231873 | t3m_00229 | Coordinates    | 34127..35104(-)                                                                |          |
| 2572231873 | t3m_00229 | DNA_length     | 978bp                                                                          |          |
| 2572231873 | t3m_00229 | Protein_length | 325aa                                                                          |          |
| 2572231873 | t3m_00229 | GC             |                                                                                | 0.64     |
| 2572231874 | t3m_00230 | COG_category   | [O] Posttranslational modification, protein turnover, chaperones               |          |
| 2572231874 | t3m_00230 | COG0425        | Predicted redox protein, regulator of disulfide bond formation                 | 1.00E-06 |
| 2572231874 | t3m_00230 | pfam01206      | TusA                                                                           | 1.40E-09 |
| 2572231874 | t3m_00230 | Locus_type     | CDS                                                                            |          |
| 2572231874 | t3m_00230 | Product_name   | Predicted redox protein, regulator of disulfide bond formation                 |          |
| 2572231874 | t3m_00230 | Scaffold       | t3m_contig_70_28_len_67510_read_count_6030377.3                                |          |
| 2572231874 | t3m_00230 | Coordinates    | 35147..35431(-)                                                                |          |
| 2572231874 | t3m_00230 | DNA_length     | 285bp                                                                          |          |
| 2572231874 | t3m_00230 | Protein_length | 94aa                                                                           |          |
| 2572231874 | t3m_00230 | GC             |                                                                                | 0.67     |

|            |           |                |                                                                         |          |
|------------|-----------|----------------|-------------------------------------------------------------------------|----------|
| 2572231875 | t3m_00231 | COG_category   | [S] Function unknown                                                    |          |
| 2572231875 | t3m_00231 | COG1891        | Uncharacterized protein conserved in archaea                            | 1.00E-47 |
| 2572231875 | t3m_00231 | pfam04476      | DUF556                                                                  | 4.50E-57 |
| 2572231875 | t3m_00231 | KO:K09733      | hypothetical protein                                                    | 0.00E+00 |
| 2572231875 | t3m_00231 | Locus_type     | CDS                                                                     |          |
| 2572231875 | t3m_00231 | Product_name   | Uncharacterized protein conserved in archaea                            |          |
| 2572231875 | t3m_00231 | Scaffold       | t3m_contig_70_28_len_67510_read_count_6030377.3                         |          |
| 2572231875 | t3m_00231 | Coordinates    | 35428..36192(-)                                                         |          |
| 2572231875 | t3m_00231 | DNA_length     | 765bp                                                                   |          |
| 2572231875 | t3m_00231 | Protein_length | 254aa                                                                   |          |
| 2572231875 | t3m_00231 | GC             |                                                                         | 0.66     |
|            |           |                |                                                                         |          |
| 2572231876 | t3m_00232 | Locus_type     | CDS                                                                     |          |
| 2572231876 | t3m_00232 | Product_name   | hypothetical protein                                                    |          |
| 2572231876 | t3m_00232 | Scaffold       | t3m_contig_70_28_len_67510_read_count_6030377.3                         |          |
| 2572231876 | t3m_00232 | Coordinates    | 36601..37281(+)                                                         |          |
| 2572231876 | t3m_00232 | DNA_length     | 681bp                                                                   |          |
| 2572231876 | t3m_00232 | Protein_length | 226aa                                                                   |          |
| 2572231876 | t3m_00232 | GC             |                                                                         | 0.65     |
|            |           |                |                                                                         |          |
| 2572231877 | t3m_00233 | COG_category   | [R] General function prediction only                                    |          |
| 2572231877 | t3m_00233 | COG0596        | Predicted hydrolases or acyltransferases (alpha/beta hydrolase superfa  | 1.00E-12 |
| 2572231877 | t3m_00233 | pfam12697      | Abhydrolase_6                                                           | 7.80E-27 |
| 2572231877 | t3m_00233 | Locus_type     | CDS                                                                     |          |
| 2572231877 | t3m_00233 | Product_name   | Predicted hydrolases or acyltransferases (alpha/beta hydrolase superfan |          |
| 2572231877 | t3m_00233 | Scaffold       | t3m_contig_70_28_len_67510_read_count_6030377.3                         |          |
| 2572231877 | t3m_00233 | Coordinates    | 37392..38270(-)                                                         |          |
| 2572231877 | t3m_00233 | DNA_length     | 879bp                                                                   |          |
| 2572231877 | t3m_00233 | Protein_length | 292aa                                                                   |          |
| 2572231877 | t3m_00233 | GC             |                                                                         | 0.68     |
|            |           |                |                                                                         |          |
| 2572231878 | t3m_00234 | Locus_type     | CDS                                                                     |          |
| 2572231878 | t3m_00234 | Product_name   | hypothetical protein                                                    |          |

|            |           |                |                                                                               |          |
|------------|-----------|----------------|-------------------------------------------------------------------------------|----------|
| 2572231878 | t3m_00234 | Scaffold       | t3m_contig_70_28_len_67510_read_count_6030377.3                               |          |
| 2572231878 | t3m_00234 | Coordinates    | 38269..38484(+)                                                               |          |
| 2572231878 | t3m_00234 | DNA_length     | 216bp                                                                         |          |
| 2572231878 | t3m_00234 | Protein_length | 71aa                                                                          |          |
| 2572231878 | t3m_00234 | GC             |                                                                               | 0.64     |
|            |           |                |                                                                               |          |
| 2572231879 | t3m_00235 | Locus_type     | CDS                                                                           |          |
| 2572231879 | t3m_00235 | Product_name   | hypothetical protein                                                          |          |
| 2572231879 | t3m_00235 | Scaffold       | t3m_contig_70_28_len_67510_read_count_6030377.3                               |          |
| 2572231879 | t3m_00235 | Coordinates    | 38481..39155(+)                                                               |          |
| 2572231879 | t3m_00235 | DNA_length     | 675bp                                                                         |          |
| 2572231879 | t3m_00235 | Protein_length | 224aa                                                                         |          |
| 2572231879 | t3m_00235 | GC             |                                                                               | 0.64     |
|            |           |                |                                                                               |          |
| 2572231880 | t3m_00236 | KEGG_module    | M00045: Histidine degradation, histidine => N-formiminoglutamate => glutamate |          |
| 2572231880 | t3m_00236 | Metacyc        | PWY-5030: histidine degradation III                                           |          |
| 2572231880 | t3m_00236 | Metacyc        | HISHP-PWY: histidine degradation VI                                           |          |
| 2572231880 | t3m_00236 | Metacyc        | PWY-5028: histidine degradation II                                            |          |
| 2572231880 | t3m_00236 | Metacyc        | HISDEG-PWY: histidine degradation I                                           |          |
| 2572231880 | t3m_00236 | IMG_pathway    | 189: L-histidine degradation to L-glutamate and formamide                     |          |
| 2572231880 | t3m_00236 | IMG_pathway    | 190: L-histidine degradation to L-glutamate and formiminotetrahydrofolate     |          |
| 2572231880 | t3m_00236 | COG_category   | [E] Amino acid transport and metabolism                                       |          |
| 2572231880 | t3m_00236 | COG2986        | Histidine ammonia-lyase                                                       | 0.00E+00 |
| 2572231880 | t3m_00236 | pfam00221      | Lyase_aromatic                                                                | 0.00E+00 |
| 2572231880 | t3m_00236 | EC:4.3.1.3     | Histidine ammonia-lyase.                                                      |          |
| 2572231880 | t3m_00236 | TIGR01225      | histidine ammonia-lyase                                                       | 0.00E+00 |
| 2572231880 | t3m_00236 | KO:K01745      | histidine ammonia-lyase [EC:4.3.1.3]                                          | 0.00E+00 |
| 2572231880 | t3m_00236 | ITERM:00500    | histidine ammonia-lyase (EC 4.3.1.3)                                          |          |
| 2572231880 | t3m_00236 | Locus_type     | CDS                                                                           |          |
| 2572231880 | t3m_00236 | Product_name   | histidine ammonia-lyase (EC 4.3.1.3)                                          |          |
| 2572231880 | t3m_00236 | Scaffold       | t3m_contig_70_28_len_67510_read_count_6030377.3                               |          |
| 2572231880 | t3m_00236 | Coordinates    | 39191..40714(-)                                                               |          |
| 2572231880 | t3m_00236 | DNA_length     | 1524bp                                                                        |          |
| 2572231880 | t3m_00236 | Protein_length | 507aa                                                                         |          |



|            |           |                |                                                 |          |
|------------|-----------|----------------|-------------------------------------------------|----------|
| 2572231880 | t3m_00236 | GC             |                                                 | 0.65     |
| 2572231881 | t3m_00237 | COG_category   | [G] Carbohydrate transport and metabolism       |          |
| 2572231881 | t3m_00237 | COG2814        | Arabinose efflux permease                       | 2.00E-04 |
| 2572231881 | t3m_00237 | pfam07690      | MFS_1                                           | 1.70E-23 |
| 2572231881 | t3m_00237 | pfam07690      | MFS_1                                           | 3.00E-12 |
| 2572231881 | t3m_00237 | Locus_type     | CDS                                             |          |
| 2572231881 | t3m_00237 | Product_name   | Arabinose efflux permease                       |          |
| 2572231881 | t3m_00237 | Scaffold       | t3m_contig_70_28_len_67510_read_count_6030377.3 |          |
| 2572231881 | t3m_00237 | Coordinates    | 41980..43737(+)                                 |          |
| 2572231881 | t3m_00237 | DNA_length     | 1758bp                                          |          |
| 2572231881 | t3m_00237 | Protein_length | 585aa                                           |          |
| 2572231881 | t3m_00237 | GC             |                                                 | 0.65     |
| 2572231881 | t3m_00237 | Transmembrane  | Yes                                             |          |
| 2572231882 | t3m_00238 | pfam08241      | Methyltransf_11                                 | 1.20E-16 |
| 2572231882 | t3m_00238 | Locus_type     | CDS                                             |          |
| 2572231882 | t3m_00238 | Product_name   | Methyltransferase domain                        |          |
| 2572231882 | t3m_00238 | Scaffold       | t3m_contig_70_28_len_67510_read_count_6030377.3 |          |
| 2572231882 | t3m_00238 | Coordinates    | 44126..44995(+)                                 |          |
| 2572231882 | t3m_00238 | DNA_length     | 870bp                                           |          |
| 2572231882 | t3m_00238 | Protein_length | 289aa                                           |          |
| 2572231882 | t3m_00238 | GC             |                                                 | 0.67     |
| 2572231883 | t3m_00239 | COG_category   | [R] General function prediction only            |          |
| 2572231883 | t3m_00239 | COG0491        | Zn-dependent hydrolases, including glyoxylases  | 3.00E-19 |
| 2572231883 | t3m_00239 | pfam00753      | Lactamase_B                                     | 5.50E-29 |
| 2572231883 | t3m_00239 | Locus_type     | CDS                                             |          |
| 2572231883 | t3m_00239 | Product_name   | Zn-dependent hydrolases, including glyoxylases  |          |
| 2572231883 | t3m_00239 | Scaffold       | t3m_contig_70_28_len_67510_read_count_6030377.3 |          |
| 2572231883 | t3m_00239 | Coordinates    | 45073..45780(+)                                 |          |
| 2572231883 | t3m_00239 | DNA_length     | 708bp                                           |          |
| 2572231883 | t3m_00239 | Protein_length | 235aa                                           |          |
| 2572231883 | t3m_00239 | GC             |                                                 | 0.67     |

|            |           |                |                                                 |          |
|------------|-----------|----------------|-------------------------------------------------|----------|
| 2572231884 | t3m_00240 | Locus_type     | CDS                                             |          |
| 2572231884 | t3m_00240 | Product_name   | hypothetical protein                            |          |
| 2572231884 | t3m_00240 | Scaffold       | t3m_contig_70_28_len_67510_read_count_6030377.3 |          |
| 2572231884 | t3m_00240 | Coordinates    | 45844..46320(-)                                 |          |
| 2572231884 | t3m_00240 | DNA_length     | 477bp                                           |          |
| 2572231884 | t3m_00240 | Protein_length | 158aa                                           |          |
| 2572231884 | t3m_00240 | GC             |                                                 | 0.68     |
| 2572231885 | t3m_00241 | KEGG_module    | M00288: RPA complex                             |          |
| 2572231885 | t3m_00241 | pfam01336      | tRNA_anti-codon                                 | 5.70E-08 |
| 2572231885 | t3m_00241 | KO:K07466      | replication factor A1                           | 1.30E-10 |
| 2572231885 | t3m_00241 | Locus_type     | CDS                                             |          |
| 2572231885 | t3m_00241 | Product_name   | OB-fold nucleic acid binding domain             |          |
| 2572231885 | t3m_00241 | Scaffold       | t3m_contig_70_28_len_67510_read_count_6030377.3 |          |
| 2572231885 | t3m_00241 | Coordinates    | 46400..46708(-)                                 |          |
| 2572231885 | t3m_00241 | DNA_length     | 309bp                                           |          |
| 2572231885 | t3m_00241 | Protein_length | 102aa                                           |          |
| 2572231885 | t3m_00241 | GC             |                                                 | 0.66     |
| 2572231886 | t3m_00242 | Locus_type     | CDS                                             |          |
| 2572231886 | t3m_00242 | Product_name   | hypothetical protein                            |          |
| 2572231886 | t3m_00242 | Scaffold       | t3m_contig_70_28_len_67510_read_count_6030377.3 |          |
| 2572231886 | t3m_00242 | Coordinates    | 46817..47068(-)                                 |          |
| 2572231886 | t3m_00242 | DNA_length     | 252bp                                           |          |
| 2572231886 | t3m_00242 | Protein_length | 83aa                                            |          |
| 2572231886 | t3m_00242 | GC             |                                                 | 0.63     |
| 2572231886 | t3m_00242 | Transmembrane  | Yes                                             |          |
| 2572231887 | t3m_00243 | COG_category   | [P] Inorganic ion transport and metabolism      |          |
| 2572231887 | t3m_00243 | COG1914        | Mn2+ and Fe2+ transporters of the NRAMP family  | 8.00E-30 |
| 2572231887 | t3m_00243 | pfam01566      | Nramp                                           | 4.00E-38 |
| 2572231887 | t3m_00243 | Locus_type     | CDS                                             |          |
| 2572231887 | t3m_00243 | Product_name   | Mn2+ and Fe2+ transporters of the NRAMP family  |          |

|            |           |                |                                                                     |          |
|------------|-----------|----------------|---------------------------------------------------------------------|----------|
| 2572231887 | t3m_00243 | Scaffold       | t3m_contig_70_28_len_67510_read_count_6030377.3                     |          |
| 2572231887 | t3m_00243 | Coordinates    | 47713..48813(+)                                                     |          |
| 2572231887 | t3m_00243 | DNA_length     | 1101bp                                                              |          |
| 2572231887 | t3m_00243 | Protein_length | 366aa                                                               |          |
| 2572231887 | t3m_00243 | GC             |                                                                     | 0.66     |
| 2572231887 | t3m_00243 | Transmembrane  | Yes                                                                 |          |
| 2572231888 | t3m_00244 | Locus_type     | CDS                                                                 |          |
| 2572231888 | t3m_00244 | Product_name   | hypothetical protein                                                |          |
| 2572231888 | t3m_00244 | Scaffold       | t3m_contig_70_28_len_67510_read_count_6030377.3                     |          |
| 2572231888 | t3m_00244 | Coordinates    | 48917..49084(+)                                                     |          |
| 2572231888 | t3m_00244 | DNA_length     | 168bp                                                               |          |
| 2572231888 | t3m_00244 | Protein_length | 55aa                                                                |          |
| 2572231888 | t3m_00244 | GC             |                                                                     | 0.61     |
| 2572231888 | t3m_00244 | Transmembrane  | Yes                                                                 |          |
| 2572231889 | t3m_00245 | COG_category   | [C] Energy production and conversion                                |          |
| 2572231889 | t3m_00245 | COG1529        | Aerobic-type carbon monoxide dehydrogenase, large subunit CoxL/CutI | 7.00E-54 |
| 2572231889 | t3m_00245 | pfam01315      | Ald_Xan_dh_C                                                        | 1.20E-06 |
| 2572231889 | t3m_00245 | pfam02738      | Ald_Xan_dh_C2                                                       | 2.30E-11 |
| 2572231889 | t3m_00245 | pfam02738      | Ald_Xan_dh_C2                                                       | 2.60E-14 |
| 2572231889 | t3m_00245 | pfam02738      | Ald_Xan_dh_C2                                                       | 7.70E-45 |
| 2572231889 | t3m_00245 | EC:1.3.99.16   | Isoquinoline 1-oxidoreductase.                                      |          |
| 2572231889 | t3m_00245 | KO:K00256      | isoquinoline 1-oxidoreductase [EC:1.3.99.16]                        | 0.00E+00 |
| 2572231889 | t3m_00245 | Locus_type     | CDS                                                                 |          |
| 2572231889 | t3m_00245 | Product_name   | Aerobic-type carbon monoxide dehydrogenase, large subunit CoxL/CutL |          |
| 2572231889 | t3m_00245 | Scaffold       | t3m_contig_70_28_len_67510_read_count_6030377.3                     |          |
| 2572231889 | t3m_00245 | Coordinates    | 49152..51254(-)                                                     |          |
| 2572231889 | t3m_00245 | DNA_length     | 2103bp                                                              |          |
| 2572231889 | t3m_00245 | Protein_length | 700aa                                                               |          |
| 2572231889 | t3m_00245 | GC             |                                                                     | 0.69     |
| 2572231890 | t3m_00246 | Metacyc        | PWY-5372: carbon tetrachloride degradation II                       |          |
| 2572231890 | t3m_00246 | Metacyc        | PWY-6780: hydrogen production VI                                    |          |

|            |           |                |                                                                     |          |
|------------|-----------|----------------|---------------------------------------------------------------------|----------|
| 2572231890 | t3m_00246 | COG_category   | [C] Energy production and conversion                                |          |
| 2572231890 | t3m_00246 | COG2080        | Aerobic-type carbon monoxide dehydrogenase, small subunit CoxS/Cut  | 7.00E-54 |
| 2572231890 | t3m_00246 | pfam00111      | Fer2                                                                | 3.30E-10 |
| 2572231890 | t3m_00246 | pfam01799      | Fer2_2                                                              | 3.90E-33 |
| 2572231890 | t3m_00246 | EC:1.2.99.2    | Carbon-monoxide dehydrogenase (acceptor).                           |          |
| 2572231890 | t3m_00246 | KO:K03518      | carbon-monoxide dehydrogenase small subunit [EC:1.2.99.2]           | 2.00E-44 |
| 2572231890 | t3m_00246 | Locus_type     | CDS                                                                 |          |
| 2572231890 | t3m_00246 | Product_name   | Aerobic-type carbon monoxide dehydrogenase, small subunit CoxS/CutS |          |
| 2572231890 | t3m_00246 | Scaffold       | t3m_contig_70_28_len_67510_read_count_6030377.3                     |          |
| 2572231890 | t3m_00246 | Coordinates    | 51251..51730(-)                                                     |          |
| 2572231890 | t3m_00246 | DNA_length     | 480bp                                                               |          |
| 2572231890 | t3m_00246 | Protein_length | 159aa                                                               |          |
| 2572231890 | t3m_00246 | GC             |                                                                     | 0.68     |
|            |           |                |                                                                     |          |
| 2572231891 | t3m_00247 | Locus_type     | CDS                                                                 |          |
| 2572231891 | t3m_00247 | Product_name   | hypothetical protein                                                |          |
| 2572231891 | t3m_00247 | Scaffold       | t3m_contig_70_28_len_67510_read_count_6030377.3                     |          |
| 2572231891 | t3m_00247 | Coordinates    | 51959..53257(+)                                                     |          |
| 2572231891 | t3m_00247 | DNA_length     | 1299bp                                                              |          |
| 2572231891 | t3m_00247 | Protein_length | 432aa                                                               |          |
| 2572231891 | t3m_00247 | GC             |                                                                     | 0.67     |
| 2572231891 | t3m_00247 | Transmembrane  | Yes                                                                 |          |
|            |           |                |                                                                     |          |
| 2572231892 | t3m_00248 | Locus_type     | CDS                                                                 |          |
| 2572231892 | t3m_00248 | Product_name   | hypothetical protein                                                |          |
| 2572231892 | t3m_00248 | Scaffold       | t3m_contig_70_28_len_67510_read_count_6030377.3                     |          |
| 2572231892 | t3m_00248 | Coordinates    | 53254..54708(-)                                                     |          |
| 2572231892 | t3m_00248 | DNA_length     | 1455bp                                                              |          |
| 2572231892 | t3m_00248 | Protein_length | 484aa                                                               |          |
| 2572231892 | t3m_00248 | GC             |                                                                     | 0.67     |
| 2572231892 | t3m_00248 | Transmembrane  | Yes                                                                 |          |
|            |           |                |                                                                     |          |
| 2572231893 | t3m_00249 | Locus_type     | CDS                                                                 |          |
| 2572231893 | t3m_00249 | Product_name   | hypothetical protein                                                |          |

|            |           |                |                                                               |                                                 |           |
|------------|-----------|----------------|---------------------------------------------------------------|-------------------------------------------------|-----------|
| 2572231893 | t3m_00249 | Scaffold       |                                                               | t3m_contig_70_28_len_67510_read_count_6030377.3 |           |
| 2572231893 | t3m_00249 | Coordinates    |                                                               | 54905..56191(+)                                 |           |
| 2572231893 | t3m_00249 | DNA_length     |                                                               | 1287bp                                          |           |
| 2572231893 | t3m_00249 | Protein_length |                                                               | 428aa                                           |           |
| 2572231893 | t3m_00249 | GC             |                                                               |                                                 | 0.67      |
| 2572231893 | t3m_00249 | Transmembrane  |                                                               | Yes                                             |           |
| 2572231894 | t3m_00250 | pfam09594      | DUF2029                                                       |                                                 | 7.10E-07  |
| 2572231894 | t3m_00250 | Locus_type     |                                                               | CDS                                             |           |
| 2572231894 | t3m_00250 | Product_name   |                                                               | Protein of unknown function (DUF2029)           |           |
| 2572231894 | t3m_00250 | Scaffold       |                                                               | t3m_contig_70_28_len_67510_read_count_6030377.3 |           |
| 2572231894 | t3m_00250 | Coordinates    |                                                               | 56300..57592(+)                                 |           |
| 2572231894 | t3m_00250 | DNA_length     |                                                               | 1293bp                                          |           |
| 2572231894 | t3m_00250 | Protein_length |                                                               | 430aa                                           |           |
| 2572231894 | t3m_00250 | GC             |                                                               |                                                 | 0.7       |
| 2572231894 | t3m_00250 | Transmembrane  |                                                               | Yes                                             |           |
| 2572231895 | t3m_00251 | Metacyc        | NADPHOS-DEPHOS-PWY: NAD phosphorylation and dephosphorylation |                                                 |           |
| 2572231895 | t3m_00251 | COG_category   | [C] Energy production and conversion                          |                                                 |           |
| 2572231895 | t3m_00251 | COG1282        | NAD/NADP transhydrogenase beta subunit                        |                                                 | 1.00E-116 |
| 2572231895 | t3m_00251 | pfam02233      | PNTB                                                          |                                                 | 0.00E+00  |
| 2572231895 | t3m_00251 | EC:1.6.1.2     | NAD(P)(+) transhydrogenase (AB-specific).                     |                                                 |           |
| 2572231895 | t3m_00251 | KO:K00325      | NAD(P) transhydrogenase subunit beta [EC:1.6.1.2]             |                                                 | 0.00E+00  |
| 2572231895 | t3m_00251 | Locus_type     |                                                               | CDS                                             |           |
| 2572231895 | t3m_00251 | Product_name   |                                                               | NAD/NADP transhydrogenase beta subunit          |           |
| 2572231895 | t3m_00251 | Scaffold       |                                                               | t3m_contig_70_28_len_67510_read_count_6030377.3 |           |
| 2572231895 | t3m_00251 | Coordinates    |                                                               | 57579..58994(-)                                 |           |
| 2572231895 | t3m_00251 | DNA_length     |                                                               | 1416bp                                          |           |
| 2572231895 | t3m_00251 | Protein_length |                                                               | 471aa                                           |           |
| 2572231895 | t3m_00251 | GC             |                                                               |                                                 | 0.65      |
| 2572231895 | t3m_00251 | Transmembrane  |                                                               | Yes                                             |           |
| 2572231896 | t3m_00252 | Metacyc        | NADPHOS-DEPHOS-PWY: NAD phosphorylation and dephosphorylation |                                                 |           |
| 2572231896 | t3m_00252 | pfam12769      | DUF3814                                                       |                                                 | 2.10E-30  |

|            |           |                |                                                               |           |
|------------|-----------|----------------|---------------------------------------------------------------|-----------|
| 2572231896 | t3m_00252 | EC:1.6.1.2     | NAD(P)(+) transhydrogenase (AB-specific).                     |           |
| 2572231896 | t3m_00252 | KO:K00324      | NAD(P) transhydrogenase subunit alpha [EC:1.6.1.2]            | 5.90E-32  |
| 2572231896 | t3m_00252 | Locus_type     | CDS                                                           |           |
| 2572231896 | t3m_00252 | Product_name   | Domain of unknown function (DUF3814)                          |           |
| 2572231896 | t3m_00252 | Scaffold       | t3m_contig_70_28_len_67510_read_count_6030377.3               |           |
| 2572231896 | t3m_00252 | Coordinates    | 58991..59293(-)                                               |           |
| 2572231896 | t3m_00252 | DNA_length     | 303bp                                                         |           |
| 2572231896 | t3m_00252 | Protein_length | 100aa                                                         |           |
| 2572231896 | t3m_00252 | GC             |                                                               | 0.64      |
| 2572231896 | t3m_00252 | Transmembrane  | Yes                                                           |           |
|            |           |                |                                                               |           |
| 2572231897 | t3m_00253 | Metacyc        | NADPHOS-DEPHOS-PWY: NAD phosphorylation and dephosphorylation |           |
| 2572231897 | t3m_00253 | COG_category   | [C] Energy production and conversion                          |           |
| 2572231897 | t3m_00253 | COG3288        | NAD/NADP transhydrogenase alpha subunit                       | 3.00E-91  |
| 2572231897 | t3m_00253 | pfam01262      | AlaDh_PNT_C                                                   | 4.50E-49  |
| 2572231897 | t3m_00253 | pfam05222      | AlaDh_PNT_N                                                   | 3.70E-41  |
| 2572231897 | t3m_00253 | EC:1.6.1.2     | NAD(P)(+) transhydrogenase (AB-specific).                     |           |
| 2572231897 | t3m_00253 | TIGR00561      | NAD(P) transhydrogenase, alpha subunit                        | 3.80E-101 |
| 2572231897 | t3m_00253 | KO:K00324      | NAD(P) transhydrogenase subunit alpha [EC:1.6.1.2]            | 0.00E+00  |
| 2572231897 | t3m_00253 | Locus_type     | CDS                                                           |           |
| 2572231897 | t3m_00253 | Product_name   | NAD/NADP transhydrogenase alpha subunit                       |           |
| 2572231897 | t3m_00253 | Scaffold       | t3m_contig_70_28_len_67510_read_count_6030377.3               |           |
| 2572231897 | t3m_00253 | Coordinates    | 59294..60436(-)                                               |           |
| 2572231897 | t3m_00253 | DNA_length     | 1143bp                                                        |           |
| 2572231897 | t3m_00253 | Protein_length | 380aa                                                         |           |
| 2572231897 | t3m_00253 | GC             |                                                               | 0.68      |
|            |           |                |                                                               |           |
| 2572231898 | t3m_00254 | Metacyc        | PWY-5706: alliin degradation                                  |           |
| 2572231898 | t3m_00254 | Metacyc        | PWY-181: photorespiration                                     |           |
| 2572231898 | t3m_00254 | Metacyc        | PWY-5707: isoalliin degradation                               |           |
| 2572231898 | t3m_00254 | Metacyc        | PWY-7018: paromomycin biosynthesis                            |           |
| 2572231898 | t3m_00254 | Metacyc        | P421-PWY: 4-nitrotoluene degradation I                        |           |
| 2572231898 | t3m_00254 | Metacyc        | PWY-7000: kanamycin biosynthesis                              |           |
| 2572231898 | t3m_00254 | COG_category   | [R] General function prediction only                          |           |

|            |           |                |                                                                                |          |
|------------|-----------|----------------|--------------------------------------------------------------------------------|----------|
| 2572231898 | t3m_00254 | COG0579        | Predicted dehydrogenase                                                        | 3.00E-80 |
| 2572231898 | t3m_00254 | pfam01266      | DAO                                                                            | 3.70E-51 |
| 2572231898 | t3m_00254 | EC:1.1.3.-     | Oxidoreductases. Acting on the CH-OH group of donors. With oxygen as acceptor. |          |
| 2572231898 | t3m_00254 | KO:K15736      | L-2-hydroxyglutarate oxidase [EC:1.1.3.-]                                      | 0.00E+00 |
| 2572231898 | t3m_00254 | Locus_type     | CDS                                                                            |          |
| 2572231898 | t3m_00254 | Product_name   | Predicted dehydrogenase                                                        |          |
| 2572231898 | t3m_00254 | Scaffold       | t3m_contig_70_28_len_67510_read_count_6030377.3                                |          |
| 2572231898 | t3m_00254 | Coordinates    | 60540..61742(+)                                                                |          |
| 2572231898 | t3m_00254 | DNA_length     | 1203bp                                                                         |          |
| 2572231898 | t3m_00254 | Protein_length | 400aa                                                                          |          |
| 2572231898 | t3m_00254 | GC             |                                                                                | 0.7      |
| 2572231899 | t3m_00255 | COG_category   | [L] Replication, recombination and repair                                      |          |
| 2572231899 | t3m_00255 | COG0863        | DNA modification methylase                                                     | 7.00E-27 |
| 2572231899 | t3m_00255 | pfam01555      | N6_N4_Mtase                                                                    | 1.60E-36 |
| 2572231899 | t3m_00255 | EC:2.1.1.72    | Site-specific DNA-methyltransferase (adenine-specific).                        |          |
| 2572231899 | t3m_00255 | KO:K07319      | putative adenine-specific DNA-methyltransferase [EC:2.1.1.72]                  | 0.00E+00 |
| 2572231899 | t3m_00255 | Locus_type     | CDS                                                                            |          |
| 2572231899 | t3m_00255 | Product_name   | DNA modification methylase                                                     |          |
| 2572231899 | t3m_00255 | Scaffold       | t3m_contig_70_28_len_67510_read_count_6030377.3                                |          |
| 2572231899 | t3m_00255 | Coordinates    | 61766..62611(+)                                                                |          |
| 2572231899 | t3m_00255 | DNA_length     | 846bp                                                                          |          |
| 2572231899 | t3m_00255 | Protein_length | 281aa                                                                          |          |
| 2572231899 | t3m_00255 | GC             |                                                                                | 0.69     |
| 2572231900 | t3m_00256 | pfam00535      | Glycos_transf_2                                                                | 1.70E-11 |
| 2572231900 | t3m_00256 | Locus_type     | CDS                                                                            |          |
| 2572231900 | t3m_00256 | Product_name   | Glycosyl transferase family 2                                                  |          |
| 2572231900 | t3m_00256 | Scaffold       | t3m_contig_70_28_len_67510_read_count_6030377.3                                |          |
| 2572231900 | t3m_00256 | Coordinates    | 62608..63645(-)                                                                |          |
| 2572231900 | t3m_00256 | DNA_length     | 1038bp                                                                         |          |
| 2572231900 | t3m_00256 | Protein_length | 345aa                                                                          |          |
| 2572231900 | t3m_00256 | GC             |                                                                                | 0.69     |

|            |           |                |                                                 |          |
|------------|-----------|----------------|-------------------------------------------------|----------|
| 2572231901 | t3m_00257 | COG_category   | [L] Replication, recombination and repair       |          |
| 2572231901 | t3m_00257 | COG3359        | Predicted exonuclease                           | 8.00E-30 |
| 2572231901 | t3m_00257 | pfam13482      | RNase_H_2                                       | 3.80E-25 |
| 2572231901 | t3m_00257 | KO:K07502      | hypothetical protein                            | 0.00E+00 |
| 2572231901 | t3m_00257 | Locus_type     | CDS                                             |          |
| 2572231901 | t3m_00257 | Product_name   | Predicted exonuclease                           |          |
| 2572231901 | t3m_00257 | Scaffold       | t3m_contig_70_28_len_67510_read_count_6030377.3 |          |
| 2572231901 | t3m_00257 | Coordinates    | 63654..64475(-)                                 |          |
| 2572231901 | t3m_00257 | DNA_length     | 822bp                                           |          |
| 2572231901 | t3m_00257 | Protein_length | 273aa                                           |          |
| 2572231901 | t3m_00257 | GC             |                                                 | 0.73     |
|            |           |                |                                                 |          |
| 2572231902 | t3m_00258 | Locus_type     | CDS                                             |          |
| 2572231902 | t3m_00258 | Product_name   | hypothetical protein                            |          |
| 2572231902 | t3m_00258 | Scaffold       | t3m_contig_70_28_len_67510_read_count_6030377.3 |          |
| 2572231902 | t3m_00258 | Coordinates    | 64519..64899(-)                                 |          |
| 2572231902 | t3m_00258 | DNA_length     | 381bp                                           |          |
| 2572231902 | t3m_00258 | Protein_length | 126aa                                           |          |
| 2572231902 | t3m_00258 | GC             |                                                 | 0.71     |
|            |           |                |                                                 |          |
| 2572231903 | t3m_00259 | Locus_type     | rRNA                                            |          |
| 2572231903 | t3m_00259 | Gene_symbol    | 23S                                             |          |
| 2572231903 | t3m_00259 | Product_name   | 23S rRNA. Archaeal LSU                          |          |
| 2572231903 | t3m_00259 | Scaffold       | t3m_contig_70_28_len_67510_read_count_6030377.3 |          |
| 2572231903 | t3m_00259 | Coordinates    | 65041..67509(-)                                 |          |
| 2572231903 | t3m_00259 | DNA_length     | 2469bp                                          |          |
| 2572231903 | t3m_00259 | GC             |                                                 | 0.58     |
|            |           |                |                                                 |          |
| 2572231904 | t3m_00260 | pfam03029      | ATP_bind_1                                      | 3.10E-25 |
| 2572231904 | t3m_00260 | Locus_type     | CDS                                             |          |
| 2572231904 | t3m_00260 | Product_name   | Conserved hypothetical ATP binding protein      |          |
| 2572231904 | t3m_00260 | Scaffold       | t3m_contig_70_29_len_66924_read_count_5585863.4 |          |
| 2572231904 | t3m_00260 | Coordinates    | 1..537(+)                                       |          |
| 2572231904 | t3m_00260 | DNA_length     | 537bp                                           |          |



|            |           |                |                                                                |                                                 |  |          |
|------------|-----------|----------------|----------------------------------------------------------------|-------------------------------------------------|--|----------|
| 2572231904 | t3m_00260 | Protein_length |                                                                | 178aa                                           |  |          |
| 2572231904 | t3m_00260 | GC             |                                                                |                                                 |  | 0.67     |
| 2572231905 | t3m_00261 | Locus_type     |                                                                | CDS                                             |  |          |
| 2572231905 | t3m_00261 | Product_name   |                                                                | hypothetical protein                            |  |          |
| 2572231905 | t3m_00261 | Scaffold       |                                                                | t3m_contig_70_29_len_66924_read_count_5585863.4 |  |          |
| 2572231905 | t3m_00261 | Coordinates    |                                                                | 542..844(-)                                     |  |          |
| 2572231905 | t3m_00261 | DNA_length     |                                                                | 303bp                                           |  |          |
| 2572231905 | t3m_00261 | Protein_length |                                                                | 100aa                                           |  |          |
| 2572231905 | t3m_00261 | GC             |                                                                |                                                 |  | 0.69     |
| 2572231906 | t3m_00262 | pfam01963      | TraB                                                           |                                                 |  | 4.60E-18 |
| 2572231906 | t3m_00262 | Locus_type     |                                                                | CDS                                             |  |          |
| 2572231906 | t3m_00262 | Product_name   |                                                                | TraB family                                     |  |          |
| 2572231906 | t3m_00262 | Scaffold       |                                                                | t3m_contig_70_29_len_66924_read_count_5585863.4 |  |          |
| 2572231906 | t3m_00262 | Coordinates    |                                                                | 927..1643(+)                                    |  |          |
| 2572231906 | t3m_00262 | DNA_length     |                                                                | 717bp                                           |  |          |
| 2572231906 | t3m_00262 | Protein_length |                                                                | 238aa                                           |  |          |
| 2572231906 | t3m_00262 | GC             |                                                                |                                                 |  | 0.7      |
| 2572231907 | t3m_00263 | COG_category   | [D] Cell cycle control, cell division, chromosome partitioning |                                                 |  |          |
| 2572231907 | t3m_00263 | COG0489        | ATPases involved in chromosome partitioning                    |                                                 |  | 5.00E-48 |
| 2572231907 | t3m_00263 | pfam10609      | ParA                                                           |                                                 |  | 2.30E-33 |
| 2572231907 | t3m_00263 | Locus_type     |                                                                | CDS                                             |  |          |
| 2572231907 | t3m_00263 | Product_name   |                                                                | ATPases involved in chromosome partitioning     |  |          |
| 2572231907 | t3m_00263 | Scaffold       |                                                                | t3m_contig_70_29_len_66924_read_count_5585863.4 |  |          |
| 2572231907 | t3m_00263 | Coordinates    |                                                                | 1615..2391(-)                                   |  |          |
| 2572231907 | t3m_00263 | DNA_length     |                                                                | 777bp                                           |  |          |
| 2572231907 | t3m_00263 | Protein_length |                                                                | 258aa                                           |  |          |
| 2572231907 | t3m_00263 | GC             |                                                                |                                                 |  | 0.67     |
| 2572231908 | t3m_00264 | COG_category   | [C] Energy production and conversion                           |                                                 |  |          |
| 2572231908 | t3m_00264 | COG1042        | Acyl-CoA synthetase (NDP forming)                              |                                                 |  | 0.00E+00 |
| 2572231908 | t3m_00264 | pfam13549      | ATP-grasp_5                                                    |                                                 |  | 1.80E-73 |

|            |           |                |                                                                                |          |
|------------|-----------|----------------|--------------------------------------------------------------------------------|----------|
| 2572231908 | t3m_00264 | pfam13607      | Succ_CoA_lig                                                                   | 2.10E-49 |
| 2572231908 | t3m_00264 | pfam13380      | CoA_binding_2                                                                  | 5.10E-23 |
| 2572231908 | t3m_00264 | TIGR02717      | acetyl coenzyme A synthetase (ADP forming), alpha domain                       | 0.00E+00 |
| 2572231908 | t3m_00264 | KO:K09181      | hypothetical protein                                                           | 0.00E+00 |
| 2572231908 | t3m_00264 | Locus_type     | CDS                                                                            |          |
| 2572231908 | t3m_00264 | Product_name   | Acyl-CoA synthetase (NDP forming)                                              |          |
| 2572231908 | t3m_00264 | Scaffold       | t3m_contig_70_29_len_66924_read_count_5585863.4                                |          |
| 2572231908 | t3m_00264 | Coordinates    | 2557..4692(+)                                                                  |          |
| 2572231908 | t3m_00264 | DNA_length     | 2136bp                                                                         |          |
| 2572231908 | t3m_00264 | Protein_length | 711aa                                                                          |          |
| 2572231908 | t3m_00264 | GC             |                                                                                | 0.67     |
| 2572231908 | t3m_00264 | Fused_gene     | Yes                                                                            |          |
| 2572231909 | t3m_00265 | COG_category   | [H] Coenzyme transport and metabolism                                          |          |
| 2572231909 | t3m_00265 | COG1977        | Molybdopterin converting factor, small subunit                                 | 5.00E-08 |
| 2572231909 | t3m_00265 | pfam02597      | ThiS                                                                           | 6.10E-11 |
| 2572231909 | t3m_00265 | Locus_type     | CDS                                                                            |          |
| 2572231909 | t3m_00265 | Product_name   | Molybdopterin converting factor, small subunit                                 |          |
| 2572231909 | t3m_00265 | Scaffold       | t3m_contig_70_29_len_66924_read_count_5585863.4                                |          |
| 2572231909 | t3m_00265 | Coordinates    | 5053..5310(-)                                                                  |          |
| 2572231909 | t3m_00265 | DNA_length     | 258bp                                                                          |          |
| 2572231909 | t3m_00265 | Protein_length | 85aa                                                                           |          |
| 2572231909 | t3m_00265 | GC             |                                                                                | 0.64     |
| 2572231910 | t3m_00266 | KEGG_module    | M00311: 2-oxoglutarate:ferredoxin oxidoreductase                               |          |
| 2572231910 | t3m_00266 | KEGG_module    | M00173: Reductive citric acid cycle (Arnon-Buchanan cycle)                     |          |
| 2572231910 | t3m_00266 | KEGG_module    | M00011: Citrate cycle, second carbon oxidation, 2-oxoglutarate => oxaloacetate |          |
| 2572231910 | t3m_00266 | Metacyc        | REDCITCYC: TCA cycle III (helicobacter)                                        |          |
| 2572231910 | t3m_00266 | Metacyc        | P42-PWY: incomplete reductive TCA cycle                                        |          |
| 2572231910 | t3m_00266 | Metacyc        | P23-PWY: reductive TCA cycle I                                                 |          |
| 2572231910 | t3m_00266 | Metacyc        | PWY-6969: TCA cycle V (2-oxoglutarate:ferredoxin oxidoreductase)               |          |
| 2572231910 | t3m_00266 | Metacyc        | PWY-5392: reductive TCA cycle II                                               |          |
| 2572231910 | t3m_00266 | COG_category   | [C] Energy production and conversion                                           |          |
| 2572231910 | t3m_00266 | COG0674        | Pyruvate:ferredoxin oxidoreductase and related 2-oxoacid:ferredoxin o          | 1.00E-69 |

|            |           |                |                                                                                |           |
|------------|-----------|----------------|--------------------------------------------------------------------------------|-----------|
| 2572231910 | t3m_00266 | pfam01558      | POR                                                                            | 3.50E-34  |
| 2572231910 | t3m_00266 | pfam01855      | POR_N                                                                          | 6.90E-57  |
| 2572231910 | t3m_00266 | EC:1.2.7.3     | 2-oxoglutarate synthase.                                                       |           |
| 2572231910 | t3m_00266 | TIGR03710      | 2-oxoacid:acceptor oxidoreductase, alpha subunit                               | 0.00E+00  |
| 2572231910 | t3m_00266 | KO:K00174      | 2-oxoglutarate ferredoxin oxidoreductase subunit alpha [EC:1.2.7.3]            | 0.00E+00  |
| 2572231910 | t3m_00266 | Locus_type     | CDS                                                                            |           |
| 2572231910 | t3m_00266 | Product_name   | 2-oxoacid:acceptor oxidoreductase, alpha subunit                               |           |
| 2572231910 | t3m_00266 | Scaffold       | t3m_contig_70_29_len_66924_read_count_5585863.4                                |           |
| 2572231910 | t3m_00266 | Coordinates    | 5398..7137(+)                                                                  |           |
| 2572231910 | t3m_00266 | DNA_length     | 1740bp                                                                         |           |
| 2572231910 | t3m_00266 | Protein_length | 579aa                                                                          |           |
| 2572231910 | t3m_00266 | GC             |                                                                                | 0.67      |
|            |           |                |                                                                                |           |
| 2572231911 | t3m_00267 | KEGG_module    | M00011: Citrate cycle, second carbon oxidation, 2-oxoglutarate => oxaloacetate |           |
| 2572231911 | t3m_00267 | KEGG_module    | M00311: 2-oxoglutarate:ferredoxin oxidoreductase                               |           |
| 2572231911 | t3m_00267 | Metacyc        | REDCITCYC: TCA cycle III (helicobacter)                                        |           |
| 2572231911 | t3m_00267 | Metacyc        | P23-PWY: reductive TCA cycle I                                                 |           |
| 2572231911 | t3m_00267 | Metacyc        | PWY-5392: reductive TCA cycle II                                               |           |
| 2572231911 | t3m_00267 | Metacyc        | P42-PWY: incomplete reductive TCA cycle                                        |           |
| 2572231911 | t3m_00267 | Metacyc        | PWY-6969: TCA cycle V (2-oxoglutarate:ferredoxin oxidoreductase)               |           |
| 2572231911 | t3m_00267 | COG_category   | [C] Energy production and conversion                                           |           |
| 2572231911 | t3m_00267 | COG1013        | Pyruvate:ferredoxin oxidoreductase and related 2-oxoacid:ferredoxin o          | 4.00E-80  |
| 2572231911 | t3m_00267 | pfam02775      | TPP_enzyme_C                                                                   | 1.80E-29  |
| 2572231911 | t3m_00267 | pfam12367      | PFO_beta_C                                                                     | 9.20E-24  |
| 2572231911 | t3m_00267 | EC:1.2.7.3     | 2-oxoglutarate synthase.                                                       |           |
| 2572231911 | t3m_00267 | TIGR02177      | 2-oxoacid:acceptor oxidoreductase, beta subunit, pyruvate/2-ketoisova          | 1.10E-111 |
| 2572231911 | t3m_00267 | KO:K00175      | 2-oxoglutarate ferredoxin oxidoreductase subunit beta [EC:1.2.7.3]             | 0.00E+00  |
| 2572231911 | t3m_00267 | Locus_type     | CDS                                                                            |           |
| 2572231911 | t3m_00267 | Product_name   | 2-oxoacid:acceptor oxidoreductase, beta subunit, pyruvate/2-ketoisoval         |           |
| 2572231911 | t3m_00267 | Scaffold       | t3m_contig_70_29_len_66924_read_count_5585863.4                                |           |
| 2572231911 | t3m_00267 | Coordinates    | 7155..8039(+)                                                                  |           |
| 2572231911 | t3m_00267 | DNA_length     | 885bp                                                                          |           |
| 2572231911 | t3m_00267 | Protein_length | 294aa                                                                          |           |
| 2572231911 | t3m_00267 | GC             |                                                                                | 0.66      |

|            |           |                |                                                                        |      |          |
|------------|-----------|----------------|------------------------------------------------------------------------|------|----------|
| 2572231912 | t3m_00268 | COG_category   | [R] General function prediction only                                   |      |          |
| 2572231912 | t3m_00268 | COG2244        | Membrane protein involved in the export of O-antigen and teichoic acid |      | 2.00E-17 |
| 2572231912 | t3m_00268 | pfam01943      | Polysacc_synt                                                          |      | 3.00E-20 |
| 2572231912 | t3m_00268 | pfam14667      | Polysacc_synt_C                                                        |      | 1.70E-11 |
| 2572231912 | t3m_00268 | Locus_type     | CDS                                                                    |      |          |
| 2572231912 | t3m_00268 | Product_name   | Membrane protein involved in the export of O-antigen and teichoic acid |      |          |
| 2572231912 | t3m_00268 | Scaffold       | t3m_contig_70_29_len_66924_read_count_5585863.4                        |      |          |
| 2572231912 | t3m_00268 | Coordinates    | 8243..9784(+)                                                          |      |          |
| 2572231912 | t3m_00268 | DNA_length     | 1542bp                                                                 |      |          |
| 2572231912 | t3m_00268 | Protein_length | 513aa                                                                  |      |          |
| 2572231912 | t3m_00268 | GC             |                                                                        | 0.67 |          |
| 2572231912 | t3m_00268 | Transmembrane  | Yes                                                                    |      |          |
| 2572231913 | t3m_00269 | Locus_type     | CDS                                                                    |      |          |
| 2572231913 | t3m_00269 | Product_name   | hypothetical protein                                                   |      |          |
| 2572231913 | t3m_00269 | Scaffold       | t3m_contig_70_29_len_66924_read_count_5585863.4                        |      |          |
| 2572231913 | t3m_00269 | Coordinates    | 9894..10148(+)                                                         |      |          |
| 2572231913 | t3m_00269 | DNA_length     | 255bp                                                                  |      |          |
| 2572231913 | t3m_00269 | Protein_length | 84aa                                                                   |      |          |
| 2572231913 | t3m_00269 | GC             |                                                                        | 0.69 |          |
| 2572231914 | t3m_00270 | COG_category   | [S] Function unknown                                                   |      |          |
| 2572231914 | t3m_00270 | COG0586        | Uncharacterized membrane-associated protein                            |      | 9.00E-21 |
| 2572231914 | t3m_00270 | pfam09335      | SNARE_assoc                                                            |      | 3.10E-18 |
| 2572231914 | t3m_00270 | Locus_type     | CDS                                                                    |      |          |
| 2572231914 | t3m_00270 | Product_name   | Uncharacterized membrane-associated protein                            |      |          |
| 2572231914 | t3m_00270 | Scaffold       | t3m_contig_70_29_len_66924_read_count_5585863.4                        |      |          |
| 2572231914 | t3m_00270 | Coordinates    | 10188..10892(+)                                                        |      |          |
| 2572231914 | t3m_00270 | DNA_length     | 705bp                                                                  |      |          |
| 2572231914 | t3m_00270 | Protein_length | 234aa                                                                  |      |          |
| 2572231914 | t3m_00270 | GC             |                                                                        | 0.67 |          |
| 2572231914 | t3m_00270 | Transmembrane  | Yes                                                                    |      |          |

|            |           |                |                                                                       |          |
|------------|-----------|----------------|-----------------------------------------------------------------------|----------|
| 2572231915 | t3m_00271 | KEGG_module    | M00051: Uridine monophosphate biosynthesis, glutamine (+ PRPP) => UMP |          |
| 2572231915 | t3m_00271 | Metacyc        | PWY-5686: UMP biosynthesis                                            |          |
| 2572231915 | t3m_00271 | COG_category   | [F] Nucleotide transport and metabolism                               |          |
| 2572231915 | t3m_00271 | COG0044        | Dihydroorotase and related cyclic amidohydrolases                     | 3.00E-74 |
| 2572231915 | t3m_00271 | pfam13147      | Amidohydro_4                                                          | 2.40E-13 |
| 2572231915 | t3m_00271 | EC:3.5.2.3     | Dihydroorotase.                                                       |          |
| 2572231915 | t3m_00271 | TIGR00857      | dihydroorotase, multifunctional complex type                          | 9.70E-72 |
| 2572231915 | t3m_00271 | KO:K01465      | dihydroorotase [EC:3.5.2.3]                                           | 0.00E+00 |
| 2572231915 | t3m_00271 | Locus_type     | CDS                                                                   |          |
| 2572231915 | t3m_00271 | Product_name   | Dihydroorotase and related cyclic amidohydrolases                     |          |
| 2572231915 | t3m_00271 | Scaffold       | t3m_contig_70_29_len_66924_read_count_5585863.4                       |          |
| 2572231915 | t3m_00271 | Coordinates    | 10893..12257(-)                                                       |          |
| 2572231915 | t3m_00271 | DNA_length     | 1365bp                                                                |          |
| 2572231915 | t3m_00271 | Protein_length | 454aa                                                                 |          |
| 2572231915 | t3m_00271 | GC             |                                                                       | 0.72     |

|            |           |              |                                                                        |          |
|------------|-----------|--------------|------------------------------------------------------------------------|----------|
| 2572231916 | t3m_00272 | KEGG_module  | M00048: Inosine monophosphate biosynthesis, PRPP + glutamine => IMP    |          |
| 2572231916 | t3m_00272 | Metacyc      | PWY-6122: 5-aminoimidazole ribonucleotide biosynthesis II              |          |
| 2572231916 | t3m_00272 | Metacyc      | PWY-6277: superpathway of 5-aminoimidazole ribonucleotide biosynthesis |          |
| 2572231916 | t3m_00272 | Metacyc      | PWY-6121: 5-aminoimidazole ribonucleotide biosynthesis I               |          |
| 2572231916 | t3m_00272 | IMG_pathway  | 297: 5-amino-1-(5-phospho-D-ribose)imidazole synthesis                 |          |
| 2572231916 | t3m_00272 | COG_category | [F] Nucleotide transport and metabolism                                |          |
| 2572231916 | t3m_00272 | COG0150      | Phosphoribosylaminoimidazole (AIR) synthetase                          | 8.00E-68 |
| 2572231916 | t3m_00272 | pfam02769    | AIRS_C                                                                 | 1.80E-19 |
| 2572231916 | t3m_00272 | pfam00586    | AIRS                                                                   | 1.50E-12 |
| 2572231916 | t3m_00272 | EC:6.3.3.1   | Phosphoribosylformylglycinamide cyclo-ligase.                          |          |
| 2572231916 | t3m_00272 | TIGR00878    | phosphoribosylaminoimidazole synthetase                                | 4.00E-74 |
| 2572231916 | t3m_00272 | KO:K01933    | phosphoribosylformylglycinamide cyclo-ligase [EC:6.3.3.1]              | 0.00E+00 |
| 2572231916 | t3m_00272 | ITERM:01294  | phosphoribosylformylglycinamide cyclo-ligase (EC 6.3.3.1)              |          |
| 2572231916 | t3m_00272 | Locus_type   | CDS                                                                    |          |
| 2572231916 | t3m_00272 | Product_name | phosphoribosylformylglycinamide cyclo-ligase (EC 6.3.3.1)              |          |
| 2572231916 | t3m_00272 | Scaffold     | t3m_contig_70_29_len_66924_read_count_5585863.4                        |          |
| 2572231916 | t3m_00272 | Coordinates  | 12394..13404(+)                                                        |          |
| 2572231916 | t3m_00272 | DNA_length   | 1011bp                                                                 |          |

|            |           |                |                                                 |  |           |
|------------|-----------|----------------|-------------------------------------------------|--|-----------|
| 2572231916 | t3m_00272 | Protein_length | 336aa                                           |  |           |
| 2572231916 | t3m_00272 | GC             |                                                 |  | 0.7       |
| 2572231917 | t3m_00273 | pfam00892      | EamA                                            |  | 3.30E-08  |
| 2572231917 | t3m_00273 | Locus_type     | CDS                                             |  |           |
| 2572231917 | t3m_00273 | Product_name   | EamA-like transporter family                    |  |           |
| 2572231917 | t3m_00273 | Scaffold       | t3m_contig_70_29_len_66924_read_count_5585863.4 |  |           |
| 2572231917 | t3m_00273 | Coordinates    | 13479..14435(+)                                 |  |           |
| 2572231917 | t3m_00273 | DNA_length     | 957bp                                           |  |           |
| 2572231917 | t3m_00273 | Protein_length | 318aa                                           |  |           |
| 2572231917 | t3m_00273 | GC             |                                                 |  | 0.7       |
| 2572231917 | t3m_00273 | Transmembrane  | Yes                                             |  |           |
| 2572231918 | t3m_00274 | COG_category   | [L] Replication, recombination and repair       |  |           |
| 2572231918 | t3m_00274 | COG0417        | DNA polymerase elongation subunit (family B)    |  | 1.00E-121 |
| 2572231918 | t3m_00274 | pfam00136      | DNA_pol_B                                       |  | 6.80E-60  |
| 2572231918 | t3m_00274 | pfam03104      | DNA_pol_B_exo1                                  |  | 6.40E-14  |
| 2572231918 | t3m_00274 | EC:2.7.7.7     | DNA-directed DNA polymerase.                    |  |           |
| 2572231918 | t3m_00274 | KO:K02319      | DNA polymerase I [EC:2.7.7.7]                   |  | 0.00E+00  |
| 2572231918 | t3m_00274 | Locus_type     | CDS                                             |  |           |
| 2572231918 | t3m_00274 | Product_name   | DNA polymerase elongation subunit (family B)    |  |           |
| 2572231918 | t3m_00274 | Scaffold       | t3m_contig_70_29_len_66924_read_count_5585863.4 |  |           |
| 2572231918 | t3m_00274 | Coordinates    | 14451..16913(-)                                 |  |           |
| 2572231918 | t3m_00274 | DNA_length     | 2463bp                                          |  |           |
| 2572231918 | t3m_00274 | Protein_length | 820aa                                           |  |           |
| 2572231918 | t3m_00274 | GC             |                                                 |  | 0.68      |
| 2572231919 | t3m_00275 | COG_category   | [L] Replication, recombination and repair       |  |           |
| 2572231919 | t3m_00275 | COG1573        | Uracil-DNA glycosylase                          |  | 2.00E-31  |
| 2572231919 | t3m_00275 | pfam03167      | UDG                                             |  | 2.40E-34  |
| 2572231919 | t3m_00275 | EC:2.7.7.7     | DNA-directed DNA polymerase.                    |  |           |
| 2572231919 | t3m_00275 | TIGR00758      | uracil-DNA glycosylase, family 4                |  | 3.60E-43  |
| 2572231919 | t3m_00275 | KO:K02334      | DNA polymerase bacteriophage-type [EC:2.7.7.7]  |  | 3.50E-34  |
| 2572231919 | t3m_00275 | Locus_type     | CDS                                             |  |           |

|            |           |                |                                                     |          |
|------------|-----------|----------------|-----------------------------------------------------|----------|
| 2572231919 | t3m_00275 | Product_name   | uracil-DNA glycosylase, family 4                    |          |
| 2572231919 | t3m_00275 | Scaffold       | t3m_contig_70_29_len_66924_read_count_5585863.4     |          |
| 2572231919 | t3m_00275 | Coordinates    | 16946..17581(-)                                     |          |
| 2572231919 | t3m_00275 | DNA_length     | 636bp                                               |          |
| 2572231919 | t3m_00275 | Protein_length | 211aa                                               |          |
| 2572231919 | t3m_00275 | GC             |                                                     | 0.73     |
|            |           |                |                                                     |          |
| 2572231920 | t3m_00276 | KEGG_module    | M00179: Ribosome, archaea                           |          |
| 2572231920 | t3m_00276 | KEGG_module    | M00178: Ribosome, bacteria                          |          |
| 2572231920 | t3m_00276 | COG_category   | [J] Translation, ribosomal structure and biogenesis |          |
| 2572231920 | t3m_00276 | COG0048        | Ribosomal protein S12                               | 3.00E-36 |
| 2572231920 | t3m_00276 | pfam00164      | Ribosom_S12_S23                                     | 4.30E-40 |
| 2572231920 | t3m_00276 | TIGR00982      | ribosomal protein S23 (S12)                         | 3.70E-75 |
| 2572231920 | t3m_00276 | KO:K02950      | small subunit ribosomal protein S12                 | 0.00E+00 |
| 2572231920 | t3m_00276 | Locus_type     | CDS                                                 |          |
| 2572231920 | t3m_00276 | Product_name   | SSU ribosomal protein S12P                          |          |
| 2572231920 | t3m_00276 | Scaffold       | t3m_contig_70_29_len_66924_read_count_5585863.4     |          |
| 2572231920 | t3m_00276 | Coordinates    | 17674..18108(+)                                     |          |
| 2572231920 | t3m_00276 | DNA_length     | 435bp                                               |          |
| 2572231920 | t3m_00276 | Protein_length | 144aa                                               |          |
| 2572231920 | t3m_00276 | GC             |                                                     | 0.65     |
|            |           |                |                                                     |          |
| 2572231921 | t3m_00277 | KEGG_module    | M00179: Ribosome, archaea                           |          |
| 2572231921 | t3m_00277 | KEGG_module    | M00178: Ribosome, bacteria                          |          |
| 2572231921 | t3m_00277 | COG_category   | [J] Translation, ribosomal structure and biogenesis |          |
| 2572231921 | t3m_00277 | COG0049        | Ribosomal protein S7                                | 1.00E-34 |
| 2572231921 | t3m_00277 | pfam00177      | Ribosomal_S7                                        | 8.60E-35 |
| 2572231921 | t3m_00277 | TIGR01028      | ribosomal protein S7(archaeal)/S5(eukaryotic)       | 3.80E-72 |
| 2572231921 | t3m_00277 | KO:K02992      | small subunit ribosomal protein S7                  | 0.00E+00 |
| 2572231921 | t3m_00277 | ITERM:01649    | SSU ribosomal protein S7P                           |          |
| 2572231921 | t3m_00277 | Locus_type     | CDS                                                 |          |
| 2572231921 | t3m_00277 | Product_name   | SSU ribosomal protein S7P                           |          |
| 2572231921 | t3m_00277 | Scaffold       | t3m_contig_70_29_len_66924_read_count_5585863.4     |          |
| 2572231921 | t3m_00277 | Coordinates    | 18105..18767(+)                                     |          |

|            |           |                |                                                                     |          |
|------------|-----------|----------------|---------------------------------------------------------------------|----------|
| 2572231921 | t3m_00277 | DNA_length     | 663bp                                                               |          |
| 2572231921 | t3m_00277 | Protein_length | 220aa                                                               |          |
| 2572231921 | t3m_00277 | GC             |                                                                     | 0.67     |
| 2572231922 | t3m_00278 | COG_category   | [J] Translation, ribosomal structure and biogenesis                 |          |
| 2572231922 | t3m_00278 | COG0480        | Translation elongation factors (GTPases)                            | 0.00E+00 |
| 2572231922 | t3m_00278 | pfam14492      | EFG_II                                                              | 7.00E-25 |
| 2572231922 | t3m_00278 | pfam03144      | GTP_EFTU_D2                                                         | 3.00E-13 |
| 2572231922 | t3m_00278 | pfam00009      | GTP_EFTU                                                            | 1.10E-54 |
| 2572231922 | t3m_00278 | pfam00679      | EFG_C                                                               | 7.50E-20 |
| 2572231922 | t3m_00278 | pfam03764      | EFG_IV                                                              | 1.10E-25 |
| 2572231922 | t3m_00278 | TIGR00231      | small GTP-binding protein domain                                    | 1.80E-23 |
| 2572231922 | t3m_00278 | TIGR00490      | translation elongation factor aEF-2                                 | 0.00E+00 |
| 2572231922 | t3m_00278 | KO:K03234      | elongation factor 2                                                 | 0.00E+00 |
| 2572231922 | t3m_00278 | Locus_type     | CDS                                                                 |          |
| 2572231922 | t3m_00278 | Product_name   | translation elongation factor 2 (EF-2/EF-G)                         |          |
| 2572231922 | t3m_00278 | Scaffold       | t3m_contig_70_29_len_66924_read_count_5585863.4                     |          |
| 2572231922 | t3m_00278 | Coordinates    | 18787..20988(+)                                                     |          |
| 2572231922 | t3m_00278 | DNA_length     | 2202bp                                                              |          |
| 2572231922 | t3m_00278 | Protein_length | 733aa                                                               |          |
| 2572231922 | t3m_00278 | GC             |                                                                     | 0.65     |
| 2572231923 | t3m_00279 | COG_category   | [L] Replication, recombination and repair                           |          |
| 2572231923 | t3m_00279 | COG0350        | Methylated DNA-protein cysteine methyltransferase                   | 3.00E-32 |
| 2572231923 | t3m_00279 | pfam01035      | DNA_binding_1                                                       | 2.70E-31 |
| 2572231923 | t3m_00279 | EC:2.1.1.63    | Methylated-DNA--[protein]-cysteine S-methyltransferase.             |          |
| 2572231923 | t3m_00279 | TIGR00589      | O-6-methylguanine DNA methyltransferase                             | 1.80E-36 |
| 2572231923 | t3m_00279 | KO:K00567      | methylated-DNA-[protein]-cysteine S-methyltransferase [EC:2.1.1.63] | 2.50E-28 |
| 2572231923 | t3m_00279 | Locus_type     | CDS                                                                 |          |
| 2572231923 | t3m_00279 | Product_name   | O-6-methylguanine DNA methyltransferase                             |          |
| 2572231923 | t3m_00279 | Scaffold       | t3m_contig_70_29_len_66924_read_count_5585863.4                     |          |
| 2572231923 | t3m_00279 | Coordinates    | 21015..21614(-)                                                     |          |
| 2572231923 | t3m_00279 | DNA_length     | 600bp                                                               |          |
| 2572231923 | t3m_00279 | Protein_length | 199aa                                                               |          |



|            |           |                |                                                               |          |
|------------|-----------|----------------|---------------------------------------------------------------|----------|
| 2572231923 | t3m_00279 | GC             |                                                               | 0.69     |
| 2572231924 | t3m_00280 | COG_category   | [L] Replication, recombination and repair                     |          |
| 2572231924 | t3m_00280 | COG0468        | RecA/RadA recombinase                                         | 2.00E-36 |
| 2572231924 | t3m_00280 | pfam08423      | Rad51                                                         | 2.00E-22 |
| 2572231924 | t3m_00280 | TIGR02237      | DNA repair and recombination protein RadB                     | 2.70E-57 |
| 2572231924 | t3m_00280 | KO:K04484      | DNA repair protein RadB                                       | 2.70E-40 |
| 2572231924 | t3m_00280 | Locus_type     | CDS                                                           |          |
| 2572231924 | t3m_00280 | Product_name   | DNA repair and recombination protein RadB                     |          |
| 2572231924 | t3m_00280 | Scaffold       | t3m_contig_70_29_len_66924_read_count_5585863.4               |          |
| 2572231924 | t3m_00280 | Coordinates    | 21648..22337(-)                                               |          |
| 2572231924 | t3m_00280 | DNA_length     | 690bp                                                         |          |
| 2572231924 | t3m_00280 | Protein_length | 229aa                                                         |          |
| 2572231924 | t3m_00280 | GC             |                                                               | 0.7      |
| 2572231925 | t3m_00281 | COG_category   | [R] General function prediction only                          |          |
| 2572231925 | t3m_00281 | COG0595        | Predicted hydrolase of the metallo-beta-lactamase superfamily | 3.00E-38 |
| 2572231925 | t3m_00281 | pfam07521      | RMMBL                                                         | 2.50E-07 |
| 2572231925 | t3m_00281 | pfam12706      | Lactamase_B_2                                                 | 1.20E-16 |
| 2572231925 | t3m_00281 | Locus_type     | CDS                                                           |          |
| 2572231925 | t3m_00281 | Product_name   | Predicted hydrolase of the metallo-beta-lactamase superfamily |          |
| 2572231925 | t3m_00281 | Scaffold       | t3m_contig_70_29_len_66924_read_count_5585863.4               |          |
| 2572231925 | t3m_00281 | Coordinates    | 22389..23732(-)                                               |          |
| 2572231925 | t3m_00281 | DNA_length     | 1344bp                                                        |          |
| 2572231925 | t3m_00281 | Protein_length | 447aa                                                         |          |
| 2572231925 | t3m_00281 | GC             |                                                               | 0.68     |
| 2572231926 | t3m_00282 | pfam01909      | NTP_transf_2                                                  | 6.50E-06 |
| 2572231926 | t3m_00282 | Locus_type     | CDS                                                           |          |
| 2572231926 | t3m_00282 | Product_name   | Nucleotidyltransferase domain                                 |          |
| 2572231926 | t3m_00282 | Scaffold       | t3m_contig_70_29_len_66924_read_count_5585863.4               |          |
| 2572231926 | t3m_00282 | Coordinates    | 23819..24643(+)                                               |          |
| 2572231926 | t3m_00282 | DNA_length     | 825bp                                                         |          |
| 2572231926 | t3m_00282 | Protein_length | 274aa                                                         |          |

|            |           |                |                                                                      |          |
|------------|-----------|----------------|----------------------------------------------------------------------|----------|
| 2572231926 | t3m_00282 | GC             |                                                                      | 0.69     |
| 2572231927 | t3m_00283 | COG_category   | [K] Transcription                                                    |          |
| 2572231927 | t3m_00283 | COG1996        | DNA-directed RNA polymerase, subunit RPC10 (contains C4-type Zn-finç | 3.00E-05 |
| 2572231927 | t3m_00283 | Locus_type     | CDS                                                                  |          |
| 2572231927 | t3m_00283 | Product_name   | DNA-directed RNA polymerase, subunit P (EC 2.7.7.6)                  |          |
| 2572231927 | t3m_00283 | Scaffold       | t3m_contig_70_29_len_66924_read_count_5585863.4                      |          |
| 2572231927 | t3m_00283 | Coordinates    | 24662..24796(-)                                                      |          |
| 2572231927 | t3m_00283 | DNA_length     | 135bp                                                                |          |
| 2572231927 | t3m_00283 | Protein_length | 44aa                                                                 |          |
| 2572231927 | t3m_00283 | GC             |                                                                      | 0.61     |
| 2572231928 | t3m_00284 | KEGG_module    | M00177: Ribosome, eukaryotes                                         |          |
| 2572231928 | t3m_00284 | KEGG_module    | M00179: Ribosome, archaea                                            |          |
| 2572231928 | t3m_00284 | COG_category   | [J] Translation, ribosomal structure and biogenesis                  |          |
| 2572231928 | t3m_00284 | COG1997        | Ribosomal protein L37AE/L43A                                         | 3.00E-10 |
| 2572231928 | t3m_00284 | pfam01780      | Ribosomal_L37ae                                                      | 4.00E-17 |
| 2572231928 | t3m_00284 | KO:K02921      | large subunit ribosomal protein L37Ae                                | 4.60E-12 |
| 2572231928 | t3m_00284 | ITERM:00270    | LSU ribosomal protein L37AE                                          |          |
| 2572231928 | t3m_00284 | Locus_type     | CDS                                                                  |          |
| 2572231928 | t3m_00284 | Product_name   | LSU ribosomal protein L37AE                                          |          |
| 2572231928 | t3m_00284 | Scaffold       | t3m_contig_70_29_len_66924_read_count_5585863.4                      |          |
| 2572231928 | t3m_00284 | Coordinates    | 24825..25094(-)                                                      |          |
| 2572231928 | t3m_00284 | DNA_length     | 270bp                                                                |          |
| 2572231928 | t3m_00284 | Protein_length | 89aa                                                                 |          |
| 2572231928 | t3m_00284 | GC             |                                                                      | 0.7      |
| 2572231929 | t3m_00285 | KEGG_module    | M00391: Exosome, eukaryotes                                          |          |
| 2572231929 | t3m_00285 | KEGG_module    | M00390: Exosome, archaea                                             |          |
| 2572231929 | t3m_00285 | COG_category   | [J] Translation, ribosomal structure and biogenesis                  |          |
| 2572231929 | t3m_00285 | COG2123        | RNase PH-related exoribonuclease                                     | 6.00E-71 |
| 2572231929 | t3m_00285 | pfam03725      | RNase_PH_C                                                           | 1.50E-08 |
| 2572231929 | t3m_00285 | pfam01138      | RNase_PH                                                             | 1.30E-23 |
| 2572231929 | t3m_00285 | KO:K12589      | exosome complex component RRP42                                      | 0.00E+00 |

|            |           |                |                                                                      |           |
|------------|-----------|----------------|----------------------------------------------------------------------|-----------|
| 2572231929 | t3m_00285 | Locus_type     | CDS                                                                  |           |
| 2572231929 | t3m_00285 | Product_name   | ribosomal RNA-processing protein RRP42 (EC 3.1.13.-)                 |           |
| 2572231929 | t3m_00285 | Scaffold       | t3m_contig_70_29_len_66924_read_count_5585863.4                      |           |
| 2572231929 | t3m_00285 | Coordinates    | 25091..25879(-)                                                      |           |
| 2572231929 | t3m_00285 | DNA_length     | 789bp                                                                |           |
| 2572231929 | t3m_00285 | Protein_length | 262aa                                                                |           |
| 2572231929 | t3m_00285 | GC             |                                                                      | 0.69      |
|            |           |                |                                                                      |           |
| 2572231930 | t3m_00286 | KEGG_module    | M00390: Exosome, archaea                                             |           |
| 2572231930 | t3m_00286 | KEGG_module    | M00391: Exosome, eukaryotes                                          |           |
| 2572231930 | t3m_00286 | COG_category   | [J] Translation, ribosomal structure and biogenesis                  |           |
| 2572231930 | t3m_00286 | COG0689        | RNase PH                                                             | 2.00E-67  |
| 2572231930 | t3m_00286 | pfam03725      | RNase_PH_C                                                           | 3.30E-11  |
| 2572231930 | t3m_00286 | pfam01138      | RNase_PH                                                             | 1.70E-31  |
| 2572231930 | t3m_00286 | TIGR02065      | archaeal exosome-like complex exonuclease 1                          | 1.20E-107 |
| 2572231930 | t3m_00286 | KO:K11600      | exosome complex component RRP41                                      | 0.00E+00  |
| 2572231930 | t3m_00286 | Locus_type     | CDS                                                                  |           |
| 2572231930 | t3m_00286 | Product_name   | archaeal exosome-like complex exonuclease 1                          |           |
| 2572231930 | t3m_00286 | Scaffold       | t3m_contig_70_29_len_66924_read_count_5585863.4                      |           |
| 2572231930 | t3m_00286 | Coordinates    | 25876..26625(-)                                                      |           |
| 2572231930 | t3m_00286 | DNA_length     | 750bp                                                                |           |
| 2572231930 | t3m_00286 | Protein_length | 249aa                                                                |           |
| 2572231930 | t3m_00286 | GC             |                                                                      | 0.66      |
|            |           |                |                                                                      |           |
| 2572231931 | t3m_00287 | KEGG_module    | M00391: Exosome, eukaryotes                                          |           |
| 2572231931 | t3m_00287 | KEGG_module    | M00390: Exosome, archaea                                             |           |
| 2572231931 | t3m_00287 | COG_category   | [J] Translation, ribosomal structure and biogenesis                  |           |
| 2572231931 | t3m_00287 | COG1097        | RNA-binding protein Rrp4 and related proteins (contain S1 domain and | 2.00E-42  |
| 2572231931 | t3m_00287 | pfam00013      | KH_1                                                                 | 6.10E-11  |
| 2572231931 | t3m_00287 | KO:K03679      | exosome complex component RRP4                                       | 0.00E+00  |
| 2572231931 | t3m_00287 | Locus_type     | CDS                                                                  |           |
| 2572231931 | t3m_00287 | Product_name   | RNA-binding protein Rrp4 and related proteins (contain S1 domain and |           |
| 2572231931 | t3m_00287 | Scaffold       | t3m_contig_70_29_len_66924_read_count_5585863.4                      |           |
| 2572231931 | t3m_00287 | Coordinates    | 26656..27372(-)                                                      |           |

|            |           |                |                                                                  |          |
|------------|-----------|----------------|------------------------------------------------------------------|----------|
| 2572231931 | t3m_00287 | DNA_length     | 717bp                                                            |          |
| 2572231931 | t3m_00287 | Protein_length | 238aa                                                            |          |
| 2572231931 | t3m_00287 | GC             |                                                                  | 0.71     |
| 2572231932 | t3m_00288 | COG_category   | [J] Translation, ribosomal structure and biogenesis              |          |
| 2572231932 | t3m_00288 | COG1500        | Predicted exosome subunit                                        | 5.00E-71 |
| 2572231932 | t3m_00288 | pfam09377      | SBDS_C                                                           | 1.90E-20 |
| 2572231932 | t3m_00288 | pfam01172      | SBDS                                                             | 4.20E-26 |
| 2572231932 | t3m_00288 | TIGR00291      | rRNA metabolism protein, SBDS family                             | 2.10E-84 |
| 2572231932 | t3m_00288 | KO:K14574      | ribosome maturation protein SDO1                                 | 0.00E+00 |
| 2572231932 | t3m_00288 | Locus_type     | CDS                                                              |          |
| 2572231932 | t3m_00288 | Product_name   | rRNA metabolism protein, SBDS family                             |          |
| 2572231932 | t3m_00288 | Scaffold       | t3m_contig_70_29_len_66924_read_count_5585863.4                  |          |
| 2572231932 | t3m_00288 | Coordinates    | 27562..28257(-)                                                  |          |
| 2572231932 | t3m_00288 | DNA_length     | 696bp                                                            |          |
| 2572231932 | t3m_00288 | Protein_length | 231aa                                                            |          |
| 2572231932 | t3m_00288 | GC             |                                                                  | 0.65     |
| 2572231933 | t3m_00289 | KEGG_module    | M00343: Archaeal proteasome                                      |          |
| 2572231933 | t3m_00289 | KEGG_module    | M00342: Bacterial proteasome                                     |          |
| 2572231933 | t3m_00289 | COG_category   | [O] Posttranslational modification, protein turnover, chaperones |          |
| 2572231933 | t3m_00289 | COG0638        | 20S proteasome, alpha and beta subunits                          | 2.00E-62 |
| 2572231933 | t3m_00289 | pfam00227      | Proteasome                                                       | 1.20E-52 |
| 2572231933 | t3m_00289 | pfam10584      | Proteasome_A_N                                                   | 1.20E-14 |
| 2572231933 | t3m_00289 | EC:3.4.25.1    | Proteasome endopeptidase complex.                                |          |
| 2572231933 | t3m_00289 | TIGR03633      | proteasome endopeptidase complex, archaeal, alpha subunit        | 2.20E-94 |
| 2572231933 | t3m_00289 | KO:K03432      | proteasome alpha subunit [EC:3.4.25.1]                           | 0.00E+00 |
| 2572231933 | t3m_00289 | Locus_type     | CDS                                                              |          |
| 2572231933 | t3m_00289 | Product_name   | proteasome endopeptidase complex, archaeal, alpha subunit        |          |
| 2572231933 | t3m_00289 | Scaffold       | t3m_contig_70_29_len_66924_read_count_5585863.4                  |          |
| 2572231933 | t3m_00289 | Coordinates    | 28281..29036(-)                                                  |          |
| 2572231933 | t3m_00289 | DNA_length     | 756bp                                                            |          |
| 2572231933 | t3m_00289 | Protein_length | 251aa                                                            |          |
| 2572231933 | t3m_00289 | GC             |                                                                  | 0.69     |

|            |           |                |                                                                  |          |
|------------|-----------|----------------|------------------------------------------------------------------|----------|
| 2572231934 | t3m_00290 | COG_category   | [O] Posttranslational modification, protein turnover, chaperones |          |
| 2572231934 | t3m_00290 | COG1331        | Highly conserved protein containing a thioredoxin domain         | 0.00E+00 |
| 2572231934 | t3m_00290 | pfam03190      | Thioredox_DsbH                                                   | 5.40E-61 |
| 2572231934 | t3m_00290 | Locus_type     | CDS                                                              |          |
| 2572231934 | t3m_00290 | Product_name   | Highly conserved protein containing a thioredoxin domain         |          |
| 2572231934 | t3m_00290 | Scaffold       | t3m_contig_70_29_len_66924_read_count_5585863.4                  |          |
| 2572231934 | t3m_00290 | Coordinates    | 29191..31311(+)                                                  |          |
| 2572231934 | t3m_00290 | DNA_length     | 2121bp                                                           |          |
| 2572231934 | t3m_00290 | Protein_length | 706aa                                                            |          |
| 2572231934 | t3m_00290 | GC             |                                                                  | 0.7      |
| 2572231935 | t3m_00291 | COG_category   | [R] General function prediction only                             |          |
| 2572231935 | t3m_00291 | COG1407        | Predicted ICC-like phosphoesterases                              | 2.00E-18 |
| 2572231935 | t3m_00291 | pfam12850      | Metallophos_2                                                    | 1.40E-06 |
| 2572231935 | t3m_00291 | ITERM:01876    | putative phosphoesterase                                         |          |
| 2572231935 | t3m_00291 | Locus_type     | CDS                                                              |          |
| 2572231935 | t3m_00291 | Product_name   | putative phosphoesterase                                         |          |
| 2572231935 | t3m_00291 | Scaffold       | t3m_contig_70_29_len_66924_read_count_5585863.4                  |          |
| 2572231935 | t3m_00291 | Coordinates    | 31247..32059(-)                                                  |          |
| 2572231935 | t3m_00291 | DNA_length     | 813bp                                                            |          |
| 2572231935 | t3m_00291 | Protein_length | 270aa                                                            |          |
| 2572231935 | t3m_00291 | GC             |                                                                  | 0.72     |
| 2572231936 | t3m_00292 | COG_category   | [K] Transcription                                                |          |
| 2572231936 | t3m_00292 | COG1395        | Predicted transcriptional regulator                              | 1.00E-54 |
| 2572231936 | t3m_00292 | pfam01381      | HTH_3                                                            | 5.10E-05 |
| 2572231936 | t3m_00292 | KO:K07728      | putative transcriptional regulator                               | 0.00E+00 |
| 2572231936 | t3m_00292 | Locus_type     | CDS                                                              |          |
| 2572231936 | t3m_00292 | Product_name   | Predicted transcriptional regulator                              |          |
| 2572231936 | t3m_00292 | Scaffold       | t3m_contig_70_29_len_66924_read_count_5585863.4                  |          |
| 2572231936 | t3m_00292 | Coordinates    | 32205..33194(+)                                                  |          |
| 2572231936 | t3m_00292 | DNA_length     | 990bp                                                            |          |
| 2572231936 | t3m_00292 | Protein_length | 329aa                                                            |          |

|            |           |                |                                                     |          |
|------------|-----------|----------------|-----------------------------------------------------|----------|
| 2572231936 | t3m_00292 | GC             |                                                     | 0.69     |
| 2572231937 | t3m_00293 | Locus_type     | CDS                                                 |          |
| 2572231937 | t3m_00293 | Product_name   | hypothetical protein                                |          |
| 2572231937 | t3m_00293 | Scaffold       | t3m_contig_70_29_len_66924_read_count_5585863.4     |          |
| 2572231937 | t3m_00293 | Coordinates    | 33191..33838(+)                                     |          |
| 2572231937 | t3m_00293 | DNA_length     | 648bp                                               |          |
| 2572231937 | t3m_00293 | Protein_length | 215aa                                               |          |
| 2572231937 | t3m_00293 | GC             |                                                     | 0.71     |
| 2572231938 | t3m_00294 | COG_category   | [H] Coenzyme transport and metabolism               |          |
| 2572231938 | t3m_00294 | COG0237        | Dephospho-CoA kinase                                | 1.00E-16 |
| 2572231938 | t3m_00294 | pfam13238      | AAA_18                                              | 1.10E-06 |
| 2572231938 | t3m_00294 | Locus_type     | CDS                                                 |          |
| 2572231938 | t3m_00294 | Product_name   | Dephospho-CoA kinase                                |          |
| 2572231938 | t3m_00294 | Scaffold       | t3m_contig_70_29_len_66924_read_count_5585863.4     |          |
| 2572231938 | t3m_00294 | Coordinates    | 33854..34396(-)                                     |          |
| 2572231938 | t3m_00294 | DNA_length     | 543bp                                               |          |
| 2572231938 | t3m_00294 | Protein_length | 180aa                                               |          |
| 2572231938 | t3m_00294 | GC             |                                                     | 0.69     |
| 2572231939 | t3m_00295 | Locus_type     | CDS                                                 |          |
| 2572231939 | t3m_00295 | Product_name   | hypothetical protein                                |          |
| 2572231939 | t3m_00295 | Scaffold       | t3m_contig_70_29_len_66924_read_count_5585863.4     |          |
| 2572231939 | t3m_00295 | Coordinates    | 34393..35019(-)                                     |          |
| 2572231939 | t3m_00295 | DNA_length     | 627bp                                               |          |
| 2572231939 | t3m_00295 | Protein_length | 208aa                                               |          |
| 2572231939 | t3m_00295 | GC             |                                                     | 0.67     |
| 2572231940 | t3m_00296 | KEGG_module    | M00359: Aminoacyl-tRNA biosynthesis, eukaryotes     |          |
| 2572231940 | t3m_00296 | KEGG_module    | M00360: Aminoacyl-tRNA biosynthesis, prokaryotes    |          |
| 2572231940 | t3m_00296 | Metacyc        | TRNA-CHARGING-PWY: tRNA charging                    |          |
| 2572231940 | t3m_00296 | IMG_pathway    | 492: Glycine ligation to tRNA(Gly)                  |          |
| 2572231940 | t3m_00296 | COG_category   | [J] Translation, ribosomal structure and biogenesis |          |

|            |           |                |                                                           |           |
|------------|-----------|----------------|-----------------------------------------------------------|-----------|
| 2572231940 | t3m_00296 | COG0423        | Glycyl-tRNA synthetase (class II)                         | 8.00E-112 |
| 2572231940 | t3m_00296 | pfam03129      | HGTP_anticodon                                            | 6.00E-16  |
| 2572231940 | t3m_00296 | pfam00587      | tRNA-synt_2b                                              | 1.60E-31  |
| 2572231940 | t3m_00296 | EC:6.1.1.14    | Glycine--tRNA ligase.                                     |           |
| 2572231940 | t3m_00296 | TIGR00389      | glycyl-tRNA synthetase, dimeric type                      | 1.00E-96  |
| 2572231940 | t3m_00296 | KO:K01880      | glycyl-tRNA synthetase [EC:6.1.1.14]                      | 0.00E+00  |
| 2572231940 | t3m_00296 | ITERM:01945    | glycyl-tRNA synthetase (EC 6.1.1.14)                      |           |
| 2572231940 | t3m_00296 | Locus_type     | CDS                                                       |           |
| 2572231940 | t3m_00296 | Product_name   | glycyl-tRNA synthetase (EC 6.1.1.14)                      |           |
| 2572231940 | t3m_00296 | Scaffold       | t3m_contig_70_29_len_66924_read_count_5585863.4           |           |
| 2572231940 | t3m_00296 | Coordinates    | 35083..36588(-)                                           |           |
| 2572231940 | t3m_00296 | DNA_length     | 1506bp                                                    |           |
| 2572231940 | t3m_00296 | Protein_length | 501aa                                                     |           |
| 2572231940 | t3m_00296 | GC             |                                                           | 0.68      |
| 2572231941 | t3m_00297 | COG_category   | [R] General function prediction only                      |           |
| 2572231941 | t3m_00297 | COG_category   | [F] Nucleotide transport and metabolism                   |           |
| 2572231941 | t3m_00297 | COG0402        | Cytosine deaminase and related metal-dependent hydrolases | 3.00E-21  |
| 2572231941 | t3m_00297 | Locus_type     | CDS                                                       |           |
| 2572231941 | t3m_00297 | Product_name   | hypothetical protein                                      |           |
| 2572231941 | t3m_00297 | Scaffold       | t3m_contig_70_29_len_66924_read_count_5585863.4           |           |
| 2572231941 | t3m_00297 | Coordinates    | 36585..37679(-)                                           |           |
| 2572231941 | t3m_00297 | DNA_length     | 1095bp                                                    |           |
| 2572231941 | t3m_00297 | Protein_length | 364aa                                                     |           |
| 2572231941 | t3m_00297 | GC             |                                                           | 0.71      |
| 2572231942 | t3m_00298 | Metacyc        | RIBOKIN-PWY: ribose degradation                           |           |
| 2572231942 | t3m_00298 | COG_category   | [G] Carbohydrate transport and metabolism                 |           |
| 2572231942 | t3m_00298 | COG0524        | Sugar kinases, ribokinase family                          | 1.00E-31  |
| 2572231942 | t3m_00298 | pfam00294      | PfkB                                                      | 9.80E-36  |
| 2572231942 | t3m_00298 | EC:2.7.1.15    | Ribokinase.                                               |           |
| 2572231942 | t3m_00298 | KO:K00852      | ribokinase [EC:2.7.1.15]                                  | 2.60E-35  |
| 2572231942 | t3m_00298 | Locus_type     | CDS                                                       |           |
| 2572231942 | t3m_00298 | Product_name   | Sugar kinases, ribokinase family                          |           |

|            |           |                |                                                                        |          |
|------------|-----------|----------------|------------------------------------------------------------------------|----------|
| 2572231942 | t3m_00298 | Scaffold       | t3m_contig_70_29_len_66924_read_count_5585863.4                        |          |
| 2572231942 | t3m_00298 | Coordinates    | 37774..38649(+)                                                        |          |
| 2572231942 | t3m_00298 | DNA_length     | 876bp                                                                  |          |
| 2572231942 | t3m_00298 | Protein_length | 291aa                                                                  |          |
| 2572231942 | t3m_00298 | GC             |                                                                        | 0.7      |
| 2572231943 | t3m_00299 | Metacyc        | PWY-6823: molybdenum cofactor biosynthesis                             |          |
| 2572231943 | t3m_00299 | IMG_pathway    | 560: Molybdenum cofactor synthesis                                     |          |
| 2572231943 | t3m_00299 | COG_category   | [H] Coenzyme transport and metabolism                                  |          |
| 2572231943 | t3m_00299 | COG0303        | Molybdopterin biosynthesis enzyme                                      | 2.00E-83 |
| 2572231943 | t3m_00299 | pfam00994      | MoCF_biosynth                                                          | 4.20E-23 |
| 2572231943 | t3m_00299 | pfam03454      | MoeA_C                                                                 | 1.90E-06 |
| 2572231943 | t3m_00299 | pfam03453      | MoeA_N                                                                 | 4.60E-40 |
| 2572231943 | t3m_00299 | EC:2.10.1.1    | Molybdopterin molybdotransferase.                                      |          |
| 2572231943 | t3m_00299 | TIGR00177      | molybdenum cofactor synthesis domain                                   | 2.00E-27 |
| 2572231943 | t3m_00299 | KO:K03750      | molybdopterin molybdotransferase [EC:2.10.1.1]                         | 0.00E+00 |
| 2572231943 | t3m_00299 | ITERM:04811    | molybdopterin molybdochelatase (EC 2.10.1.1)                           |          |
| 2572231943 | t3m_00299 | Locus_type     | CDS                                                                    |          |
| 2572231943 | t3m_00299 | Product_name   | molybdopterin molybdochelatase (EC 2.10.1.1)                           |          |
| 2572231943 | t3m_00299 | Scaffold       | t3m_contig_70_29_len_66924_read_count_5585863.4                        |          |
| 2572231943 | t3m_00299 | Coordinates    | 38659..39972(+)                                                        |          |
| 2572231943 | t3m_00299 | DNA_length     | 1314bp                                                                 |          |
| 2572231943 | t3m_00299 | Protein_length | 437aa                                                                  |          |
| 2572231943 | t3m_00299 | GC             |                                                                        | 0.72     |
| 2572231944 | t3m_00300 | KEGG_module    | M00048: Inosine monophosphate biosynthesis, PRPP + glutamine => IMP    |          |
| 2572231944 | t3m_00300 | Metacyc        | PWY-6121: 5-aminoimidazole ribonucleotide biosynthesis I               |          |
| 2572231944 | t3m_00300 | Metacyc        | PWY-6277: superpathway of 5-aminoimidazole ribonucleotide biosynthesis |          |
| 2572231944 | t3m_00300 | Metacyc        | PWY-6122: 5-aminoimidazole ribonucleotide biosynthesis II              |          |
| 2572231944 | t3m_00300 | COG_category   | [F] Nucleotide transport and metabolism                                |          |
| 2572231944 | t3m_00300 | COG0047        | Phosphoribosylformylglycinamidine (FGAM) synthase, glutamine amido     | 8.00E-57 |
| 2572231944 | t3m_00300 | pfam13507      | GATase_5                                                               | 1.90E-56 |
| 2572231944 | t3m_00300 | EC:6.3.5.3     | Phosphoribosylformylglycinamidine synthase.                            |          |
| 2572231944 | t3m_00300 | TIGR01737      | phosphoribosylformylglycinamidine synthase I                           | 4.50E-66 |



|            |           |                |                                                                           |          |
|------------|-----------|----------------|---------------------------------------------------------------------------|----------|
| 2572231944 | t3m_00300 | KO:K01952      | phosphoribosylformylglycinamide synthase [EC:6.3.5.3]                     | 0.00E+00 |
| 2572231944 | t3m_00300 | Locus_type     | CDS                                                                       |          |
| 2572231944 | t3m_00300 | Product_name   | phosphoribosylformylglycinamide synthase subunit I (EC 6.3.5.3)           |          |
| 2572231944 | t3m_00300 | Scaffold       | t3m_contig_70_29_len_66924_read_count_5585863.4                           |          |
| 2572231944 | t3m_00300 | Coordinates    | 39959..40783(+)                                                           |          |
| 2572231944 | t3m_00300 | DNA_length     | 825bp                                                                     |          |
| 2572231944 | t3m_00300 | Protein_length | 274aa                                                                     |          |
| 2572231944 | t3m_00300 | GC             |                                                                           | 0.69     |
|            |           |                |                                                                           |          |
| 2572231945 | t3m_00301 | pfam13659      | Methyltransf_26                                                           | 9.00E-12 |
| 2572231945 | t3m_00301 | TIGR00537      | HemK-related putative methylase                                           | 1.40E-35 |
| 2572231945 | t3m_00301 | Locus_type     | CDS                                                                       |          |
| 2572231945 | t3m_00301 | Product_name   | HemK-related putative methylase                                           |          |
| 2572231945 | t3m_00301 | Scaffold       | t3m_contig_70_29_len_66924_read_count_5585863.4                           |          |
| 2572231945 | t3m_00301 | Coordinates    | 40780..41427(-)                                                           |          |
| 2572231945 | t3m_00301 | DNA_length     | 648bp                                                                     |          |
| 2572231945 | t3m_00301 | Protein_length | 215aa                                                                     |          |
| 2572231945 | t3m_00301 | GC             |                                                                           | 0.73     |
|            |           |                |                                                                           |          |
| 2572231946 | t3m_00302 | Metacyc        | PWY-7185: UTP and CTP dephosphorylation I                                 |          |
| 2572231946 | t3m_00302 | Metacyc        | PWY-7184: pyrimidine deoxyribonucleotides <i>de novo</i> biosynthesis I   |          |
| 2572231946 | t3m_00302 | Metacyc        | PWY-6545: pyrimidine deoxyribonucleotides <i>de novo</i> biosynthesis III |          |
| 2572231946 | t3m_00302 | Metacyc        | PWY-7210: pyrimidine deoxyribonucleotides biosynthesis from CTP           |          |
| 2572231946 | t3m_00302 | Metacyc        | PWY-7198: pyrimidine deoxyribonucleotides <i>de novo</i> biosynthesis IV  |          |
| 2572231946 | t3m_00302 | COG_category   | [F] Nucleotide transport and metabolism                                   |          |
| 2572231946 | t3m_00302 | COG1618        | Predicted nucleotide kinase                                               | 4.00E-38 |
| 2572231946 | t3m_00302 | pfam03266      | NTPase_1                                                                  | 2.20E-47 |
| 2572231946 | t3m_00302 | EC:3.6.1.15    | Nucleoside-triphosphatase.                                                |          |
| 2572231946 | t3m_00302 | KO:K06928      | nucleoside-triphosphatase THEP1 [EC:3.6.1.15]                             | 0.00E+00 |
| 2572231946 | t3m_00302 | Locus_type     | CDS                                                                       |          |
| 2572231946 | t3m_00302 | Product_name   | Predicted nucleotide kinase                                               |          |
| 2572231946 | t3m_00302 | Scaffold       | t3m_contig_70_29_len_66924_read_count_5585863.4                           |          |
| 2572231946 | t3m_00302 | Coordinates    | 41460..42017(+)                                                           |          |
| 2572231946 | t3m_00302 | DNA_length     | 558bp                                                                     |          |

|            |           |                |                                                                                                      |  |          |
|------------|-----------|----------------|------------------------------------------------------------------------------------------------------|--|----------|
| 2572231946 | t3m_00302 | Protein_length | 185aa                                                                                                |  |          |
| 2572231946 | t3m_00302 | GC             |                                                                                                      |  | 0.64     |
| 2572231947 | t3m_00303 | Metacyc        | PWY-6829: tRNA methylation (yeast)                                                                   |  |          |
| 2572231947 | t3m_00303 | COG_category   | [J] Translation, ribosomal structure and biogenesis                                                  |  |          |
| 2572231947 | t3m_00303 | COG1867        | N2,N2-dimethylguanosine tRNA methyltransferase                                                       |  | 3.00E-61 |
| 2572231947 | t3m_00303 | pfam02005      | TRM                                                                                                  |  | 7.80E-19 |
| 2572231947 | t3m_00303 | pfam02005      | TRM                                                                                                  |  | 5.70E-40 |
| 2572231947 | t3m_00303 | EC:2.1.1.215   | tRNA (guanine(26)-N(2)/guanine(27)-N(2))-dimethyltransferase.                                        |  |          |
| 2572231947 | t3m_00303 | EC:2.1.1.216   | tRNA (guanine(26)-N(2))-dimethyltransferase.                                                         |  |          |
| 2572231947 | t3m_00303 | KO:K00555      | tRNA (guanine26-N2/guanine27-N2)-dimethyltransferase [EC:2.1.1.215                                   |  | 1.00E-40 |
| 2572231947 | t3m_00303 | Locus_type     | CDS                                                                                                  |  |          |
| 2572231947 | t3m_00303 | Product_name   | N2,N2-dimethylguanosine tRNA methyltransferase                                                       |  |          |
| 2572231947 | t3m_00303 | Scaffold       | t3m_contig_70_29_len_66924_read_count_5585863.4                                                      |  |          |
| 2572231947 | t3m_00303 | Coordinates    | 42113..43096(+)                                                                                      |  |          |
| 2572231947 | t3m_00303 | DNA_length     | 984bp                                                                                                |  |          |
| 2572231947 | t3m_00303 | Protein_length | 327aa                                                                                                |  |          |
| 2572231947 | t3m_00303 | GC             |                                                                                                      |  | 0.72     |
| 2572231948 | t3m_00304 | COG_category   | [R] General function prediction only                                                                 |  |          |
| 2572231948 | t3m_00304 | COG1201        | Lhr-like helicases                                                                                   |  | 0.00E+00 |
| 2572231948 | t3m_00304 | pfam00270      | DEAD                                                                                                 |  | 9.80E-25 |
| 2572231948 | t3m_00304 | pfam00271      | Helicase_C                                                                                           |  | 1.20E-16 |
| 2572231948 | t3m_00304 | pfam08494      | DEAD_assoc                                                                                           |  | 1.70E-23 |
| 2572231948 | t3m_00304 | EC:3.6.4.-     | Hydrolases. Acting on acid anhydrides. Acting on acid anhydrides; involved in cellular and subcellul |  |          |
| 2572231948 | t3m_00304 | KO:K03724      | ATP-dependent helicase Lhr and Lhr-like helicase [EC:3.6.4.-]                                        |  | 0.00E+00 |
| 2572231948 | t3m_00304 | Locus_type     | CDS                                                                                                  |  |          |
| 2572231948 | t3m_00304 | Product_name   | Lhr-like helicases                                                                                   |  |          |
| 2572231948 | t3m_00304 | Scaffold       | t3m_contig_70_29_len_66924_read_count_5585863.4                                                      |  |          |
| 2572231948 | t3m_00304 | Coordinates    | 43093..45936(-)                                                                                      |  |          |
| 2572231948 | t3m_00304 | DNA_length     | 2844bp                                                                                               |  |          |
| 2572231948 | t3m_00304 | Protein_length | 947aa                                                                                                |  |          |
| 2572231948 | t3m_00304 | GC             |                                                                                                      |  | 0.71     |

|            |           |                |                                                               |          |
|------------|-----------|----------------|---------------------------------------------------------------|----------|
| 2572231949 | t3m_00305 | COG_category   | [R] General function prediction only                          |          |
| 2572231949 | t3m_00305 | COG1661        | Predicted DNA-binding protein with PD1-like DNA-binding motif | 2.00E-22 |
| 2572231949 | t3m_00305 | pfam03479      | DUF296                                                        | 4.70E-28 |
| 2572231949 | t3m_00305 | Locus_type     | CDS                                                           |          |
| 2572231949 | t3m_00305 | Product_name   | Predicted DNA-binding protein with PD1-like DNA-binding motif |          |
| 2572231949 | t3m_00305 | Scaffold       | t3m_contig_70_29_len_66924_read_count_5585863.4               |          |
| 2572231949 | t3m_00305 | Coordinates    | 45983..46420(-)                                               |          |
| 2572231949 | t3m_00305 | DNA_length     | 438bp                                                         |          |
| 2572231949 | t3m_00305 | Protein_length | 145aa                                                         |          |
| 2572231949 | t3m_00305 | GC             |                                                               | 0.67     |
|            |           |                |                                                               |          |
| 2572231950 | t3m_00306 | pfam11528      | DUF3224                                                       | 5.20E-35 |
| 2572231950 | t3m_00306 | Locus_type     | CDS                                                           |          |
| 2572231950 | t3m_00306 | Product_name   | Protein of unknown function (DUF3224)                         |          |
| 2572231950 | t3m_00306 | Scaffold       | t3m_contig_70_29_len_66924_read_count_5585863.4               |          |
| 2572231950 | t3m_00306 | Coordinates    | 46553..46954(+)                                               |          |
| 2572231950 | t3m_00306 | DNA_length     | 402bp                                                         |          |
| 2572231950 | t3m_00306 | Protein_length | 133aa                                                         |          |
| 2572231950 | t3m_00306 | GC             |                                                               | 0.64     |
|            |           |                |                                                               |          |
| 2572231951 | t3m_00307 | COG_category   | [R] General function prediction only                          |          |
| 2572231951 | t3m_00307 | COG1606        | ATP-utilizing enzymes of the PP-loop superfamily              | 6.00E-54 |
| 2572231951 | t3m_00307 | pfam00733      | Asn_synthase                                                  | 2.10E-10 |
| 2572231951 | t3m_00307 | TIGR00268      | TIGR00268 family protein                                      | 2.20E-60 |
| 2572231951 | t3m_00307 | KO:K06864      | uncharacterized protein                                       | 0.00E+00 |
| 2572231951 | t3m_00307 | Locus_type     | CDS                                                           |          |
| 2572231951 | t3m_00307 | Product_name   | TIGR00268 family protein                                      |          |
| 2572231951 | t3m_00307 | Scaffold       | t3m_contig_70_29_len_66924_read_count_5585863.4               |          |
| 2572231951 | t3m_00307 | Coordinates    | 47087..47917(+)                                               |          |
| 2572231951 | t3m_00307 | DNA_length     | 831bp                                                         |          |
| 2572231951 | t3m_00307 | Protein_length | 276aa                                                         |          |
| 2572231951 | t3m_00307 | GC             |                                                               | 0.72     |
|            |           |                |                                                               |          |
| 2572231952 | t3m_00308 | COG_category   | [L] Replication, recombination and repair                     |          |

|            |           |                |                                                                    |          |
|------------|-----------|----------------|--------------------------------------------------------------------|----------|
| 2572231952 | t3m_00308 | COG0556        | Helicase subunit of the DNA excision repair complex                | 0.00E+00 |
| 2572231952 | t3m_00308 | pfam02151      | UVR                                                                | 1.60E-08 |
| 2572231952 | t3m_00308 | pfam00271      | Helicase_C                                                         | 6.60E-14 |
| 2572231952 | t3m_00308 | pfam12344      | UvrB                                                               | 8.60E-19 |
| 2572231952 | t3m_00308 | pfam04851      | ResIII                                                             | 9.40E-12 |
| 2572231952 | t3m_00308 | TIGR00631      | excinuclease ABC, B subunit                                        | 0.00E+00 |
| 2572231952 | t3m_00308 | KO:K03702      | excinuclease ABC subunit B                                         | 0.00E+00 |
| 2572231952 | t3m_00308 | ITERM:00497    | Excinuclease ABC subunit B                                         |          |
| 2572231952 | t3m_00308 | Locus_type     | CDS                                                                |          |
| 2572231952 | t3m_00308 | Product_name   | Excinuclease ABC subunit B                                         |          |
| 2572231952 | t3m_00308 | Scaffold       | t3m_contig_70_29_len_66924_read_count_5585863.4                    |          |
| 2572231952 | t3m_00308 | Coordinates    | 47914..49962(+)                                                    |          |
| 2572231952 | t3m_00308 | DNA_length     | 2049bp                                                             |          |
| 2572231952 | t3m_00308 | Protein_length | 682aa                                                              |          |
| 2572231952 | t3m_00308 | GC             |                                                                    | 0.67     |
| 2572231953 | t3m_00309 | COG_category   | [K] Transcription                                                  |          |
| 2572231953 | t3m_00309 | COG1497        | Predicted transcriptional regulator                                | 6.00E-27 |
| 2572231953 | t3m_00309 | KO:K07730      | putative transcriptional regulator                                 | 1.70E-19 |
| 2572231953 | t3m_00309 | Locus_type     | CDS                                                                |          |
| 2572231953 | t3m_00309 | Product_name   | Predicted transcriptional regulator                                |          |
| 2572231953 | t3m_00309 | Scaffold       | t3m_contig_70_29_len_66924_read_count_5585863.4                    |          |
| 2572231953 | t3m_00309 | Coordinates    | 50022..50858(+)                                                    |          |
| 2572231953 | t3m_00309 | DNA_length     | 837bp                                                              |          |
| 2572231953 | t3m_00309 | Protein_length | 278aa                                                              |          |
| 2572231953 | t3m_00309 | GC             |                                                                    | 0.73     |
| 2572231954 | t3m_00310 | KEGG_module    | M00240: Iron complex transport system                              |          |
| 2572231954 | t3m_00310 | COG_category   | [H] Coenzyme transport and metabolism                              |          |
| 2572231954 | t3m_00310 | COG_category   | [P] Inorganic ion transport and metabolism                         |          |
| 2572231954 | t3m_00310 | COG1120        | ABC-type cobalamin/Fe3+-siderophores transport systems, ATPase com | 2.00E-80 |
| 2572231954 | t3m_00310 | pfam00005      | ABC_tran                                                           | 1.20E-26 |
| 2572231954 | t3m_00310 | EC:3.6.3.34    | Iron-chelate-transporting ATPase.                                  |          |
| 2572231954 | t3m_00310 | KO:K02013      | iron complex transport system ATP-binding protein [EC:3.6.3.34]    | 0.00E+00 |

|            |           |                |                                                                     |          |
|------------|-----------|----------------|---------------------------------------------------------------------|----------|
| 2572231954 | t3m_00310 | Locus_type     | CDS                                                                 |          |
| 2572231954 | t3m_00310 | Product_name   | ABC-type cobalamin/Fe3+-siderophores transport systems, ATPase comp |          |
| 2572231954 | t3m_00310 | Scaffold       | t3m_contig_70_29_len_66924_read_count_5585863.4                     |          |
| 2572231954 | t3m_00310 | Coordinates    | 50852..52153(-)                                                     |          |
| 2572231954 | t3m_00310 | DNA_length     | 1302bp                                                              |          |
| 2572231954 | t3m_00310 | Protein_length | 433aa                                                               |          |
| 2572231954 | t3m_00310 | GC             |                                                                     | 0.69     |
|            |           |                |                                                                     |          |
| 2572231955 | t3m_00311 | KEGG_module    | M00240: Iron complex transport system                               |          |
| 2572231955 | t3m_00311 | COG_category   | [P] Inorganic ion transport and metabolism                          |          |
| 2572231955 | t3m_00311 | COG0609        | ABC-type Fe3+-siderophore transport system, permease component      | 5.00E-45 |
| 2572231955 | t3m_00311 | pfam01032      | FecCD                                                               | 1.40E-77 |
| 2572231955 | t3m_00311 | KO:K02015      | iron complex transport system permease protein                      | 0.00E+00 |
| 2572231955 | t3m_00311 | Locus_type     | CDS                                                                 |          |
| 2572231955 | t3m_00311 | Product_name   | ABC-type Fe3+-siderophore transport system, permease component      |          |
| 2572231955 | t3m_00311 | Scaffold       | t3m_contig_70_29_len_66924_read_count_5585863.4                     |          |
| 2572231955 | t3m_00311 | Coordinates    | 52150..53193(-)                                                     |          |
| 2572231955 | t3m_00311 | DNA_length     | 1044bp                                                              |          |
| 2572231955 | t3m_00311 | Protein_length | 347aa                                                               |          |
| 2572231955 | t3m_00311 | GC             |                                                                     | 0.68     |
| 2572231955 | t3m_00311 | Transmembrane  | Yes                                                                 |          |
|            |           |                |                                                                     |          |
| 2572231956 | t3m_00312 | KEGG_module    | M00240: Iron complex transport system                               |          |
| 2572231956 | t3m_00312 | COG_category   | [P] Inorganic ion transport and metabolism                          |          |
| 2572231956 | t3m_00312 | COG0614        | ABC-type Fe3+-hydroxamate transport system, periplasmic component   | 2.00E-29 |
| 2572231956 | t3m_00312 | pfam01497      | Peripla_BP_2                                                        | 8.70E-23 |
| 2572231956 | t3m_00312 | KO:K02016      | iron complex transport system substrate-binding protein             | 8.40E-29 |
| 2572231956 | t3m_00312 | Locus_type     | CDS                                                                 |          |
| 2572231956 | t3m_00312 | Product_name   | ABC-type Fe3+-hydroxamate transport system, periplasmic component   |          |
| 2572231956 | t3m_00312 | Scaffold       | t3m_contig_70_29_len_66924_read_count_5585863.4                     |          |
| 2572231956 | t3m_00312 | Coordinates    | 53264..54298(-)                                                     |          |
| 2572231956 | t3m_00312 | DNA_length     | 1035bp                                                              |          |
| 2572231956 | t3m_00312 | Protein_length | 344aa                                                               |          |
| 2572231956 | t3m_00312 | GC             |                                                                     | 0.66     |

|            |           |                |                                                                        |          |
|------------|-----------|----------------|------------------------------------------------------------------------|----------|
| 2572231956 | t3m_00312 | Transmembrane  | Yes                                                                    |          |
| 2572231957 | t3m_00313 | Locus_type     | tRNA                                                                   |          |
| 2572231957 | t3m_00313 | Product_name   | tRNA_Trp_CCA                                                           |          |
| 2572231957 | t3m_00313 | Scaffold       | t3m_contig_70_29_len_66924_read_count_5585863.4                        |          |
| 2572231957 | t3m_00313 | Coordinates    | 54427..54584(+)                                                        |          |
| 2572231957 | t3m_00313 | DNA_length     | 75bp                                                                   |          |
| 2572231957 | t3m_00313 | GC             |                                                                        | 0.59     |
| 2572231958 | t3m_00314 | Metacyc        | PWY-5386: methylglyoxal degradation I                                  |          |
| 2572231958 | t3m_00314 | pfam12681      | Glyoxalase_2                                                           | 2.70E-16 |
| 2572231958 | t3m_00314 | EC:4.4.1.5     | Lactoylglutathione lyase.                                              |          |
| 2572231958 | t3m_00314 | KO:K01759      | lactoylglutathione lyase [EC:4.4.1.5]                                  | 2.90E-09 |
| 2572231958 | t3m_00314 | Locus_type     | CDS                                                                    |          |
| 2572231958 | t3m_00314 | Product_name   | Glyoxalase-like domain                                                 |          |
| 2572231958 | t3m_00314 | Scaffold       | t3m_contig_70_29_len_66924_read_count_5585863.4                        |          |
| 2572231958 | t3m_00314 | Coordinates    | 54789..55193(+)                                                        |          |
| 2572231958 | t3m_00314 | DNA_length     | 405bp                                                                  |          |
| 2572231958 | t3m_00314 | Protein_length | 134aa                                                                  |          |
| 2572231958 | t3m_00314 | GC             |                                                                        | 0.69     |
| 2572231959 | t3m_00315 | COG_category   | [R] General function prediction only                                   |          |
| 2572231959 | t3m_00315 | COG2244        | Membrane protein involved in the export of O-antigen and teichoic acid | 5.00E-15 |
| 2572231959 | t3m_00315 | pfam14667      | Polysacc_synt_C                                                        | 2.70E-13 |
| 2572231959 | t3m_00315 | pfam01943      | Polysacc_synt                                                          | 7.60E-10 |
| 2572231959 | t3m_00315 | Locus_type     | CDS                                                                    |          |
| 2572231959 | t3m_00315 | Product_name   | Membrane protein involved in the export of O-antigen and teichoic acid |          |
| 2572231959 | t3m_00315 | Scaffold       | t3m_contig_70_29_len_66924_read_count_5585863.4                        |          |
| 2572231959 | t3m_00315 | Coordinates    | 55253..56983(+)                                                        |          |
| 2572231959 | t3m_00315 | DNA_length     | 1731bp                                                                 |          |
| 2572231959 | t3m_00315 | Protein_length | 576aa                                                                  |          |
| 2572231959 | t3m_00315 | GC             |                                                                        | 0.66     |
| 2572231959 | t3m_00315 | Transmembrane  | Yes                                                                    |          |

|            |           |                |                                                         |          |
|------------|-----------|----------------|---------------------------------------------------------|----------|
| 2572231960 | t3m_00316 | KEGG_module    | M00248: Putative antibiotic transport system            |          |
| 2572231960 | t3m_00316 | COG_category   | [V] Defense mechanisms                                  |          |
| 2572231960 | t3m_00316 | COG1131        | ABC-type multidrug transport system, ATPase component   | 5.00E-65 |
| 2572231960 | t3m_00316 | pfam00005      | ABC_tran                                                | 8.90E-30 |
| 2572231960 | t3m_00316 | KO:K09687      | antibiotic transport system ATP-binding protein         | 0.00E+00 |
| 2572231960 | t3m_00316 | Locus_type     | CDS                                                     |          |
| 2572231960 | t3m_00316 | Product_name   | ABC-type multidrug transport system, ATPase component   |          |
| 2572231960 | t3m_00316 | Scaffold       | t3m_contig_70_29_len_66924_read_count_5585863.4         |          |
| 2572231960 | t3m_00316 | Coordinates    | 57313..58239(+)                                         |          |
| 2572231960 | t3m_00316 | DNA_length     | 927bp                                                   |          |
| 2572231960 | t3m_00316 | Protein_length | 308aa                                                   |          |
| 2572231960 | t3m_00316 | GC             |                                                         | 0.67     |
|            |           |                |                                                         |          |
| 2572231961 | t3m_00317 | Locus_type     | CDS                                                     |          |
| 2572231961 | t3m_00317 | Product_name   | hypothetical protein                                    |          |
| 2572231961 | t3m_00317 | Scaffold       | t3m_contig_70_29_len_66924_read_count_5585863.4         |          |
| 2572231961 | t3m_00317 | Coordinates    | 58229..58993(+)                                         |          |
| 2572231961 | t3m_00317 | DNA_length     | 765bp                                                   |          |
| 2572231961 | t3m_00317 | Protein_length | 254aa                                                   |          |
| 2572231961 | t3m_00317 | GC             |                                                         | 0.66     |
| 2572231961 | t3m_00317 | Transmembrane  | Yes                                                     |          |
|            |           |                |                                                         |          |
| 2572231962 | t3m_00318 | COG_category   | [V] Defense mechanisms                                  |          |
| 2572231962 | t3m_00318 | COG0842        | ABC-type multidrug transport system, permease component | 5.00E-05 |
| 2572231962 | t3m_00318 | pfam01061      | ABC2_membrane                                           | 1.00E-10 |
| 2572231962 | t3m_00318 | Locus_type     | CDS                                                     |          |
| 2572231962 | t3m_00318 | Product_name   | ABC-type multidrug transport system, permease component |          |
| 2572231962 | t3m_00318 | Scaffold       | t3m_contig_70_29_len_66924_read_count_5585863.4         |          |
| 2572231962 | t3m_00318 | Coordinates    | 58994..59776(+)                                         |          |
| 2572231962 | t3m_00318 | DNA_length     | 783bp                                                   |          |
| 2572231962 | t3m_00318 | Protein_length | 260aa                                                   |          |
| 2572231962 | t3m_00318 | GC             |                                                         | 0.68     |
| 2572231962 | t3m_00318 | Transmembrane  | Yes                                                     |          |

|            |           |                |                                                                       |          |
|------------|-----------|----------------|-----------------------------------------------------------------------|----------|
| 2572231963 | t3m_00319 | COG_category   | [J] Translation, ribosomal structure and biogenesis                   |          |
| 2572231963 | t3m_00319 | COG0023        | Translation initiation factor 1 (eIF-1/SUI1) and related proteins     | 3.00E-17 |
| 2572231963 | t3m_00319 | pfam01253      | SUI1                                                                  | 2.30E-17 |
| 2572231963 | t3m_00319 | TIGR01158      | translation initiation factor SUI1, putative, prokaryotic             | 1.70E-23 |
| 2572231963 | t3m_00319 | KO:K03113      | translation initiation factor 1                                       | 4.00E-15 |
| 2572231963 | t3m_00319 | Locus_type     | CDS                                                                   |          |
| 2572231963 | t3m_00319 | Product_name   | Translation initiation factor 1 (eIF-1/SUI1) and related proteins     |          |
| 2572231963 | t3m_00319 | Scaffold       | t3m_contig_70_29_len_66924_read_count_5585863.4                       |          |
| 2572231963 | t3m_00319 | Coordinates    | 59939..60256(+)                                                       |          |
| 2572231963 | t3m_00319 | DNA_length     | 318bp                                                                 |          |
| 2572231963 | t3m_00319 | Protein_length | 105aa                                                                 |          |
| 2572231963 | t3m_00319 | GC             |                                                                       | 0.7      |
| 2572231964 | t3m_00320 | Metacyc        | PWY-5350: thiosulfate disproportionation III (rhodanese)              |          |
| 2572231964 | t3m_00320 | Metacyc        | PWY-5329: L-cysteine degradation III                                  |          |
| 2572231964 | t3m_00320 | COG_category   | [P] Inorganic ion transport and metabolism                            |          |
| 2572231964 | t3m_00320 | COG2897        | Rhodanese-related sulfurtransferase                                   | 5.00E-77 |
| 2572231964 | t3m_00320 | pfam00581      | Rhodanese                                                             | 3.20E-22 |
| 2572231964 | t3m_00320 | pfam00581      | Rhodanese                                                             | 5.90E-15 |
| 2572231964 | t3m_00320 | EC:2.8.1.2     | 3-mercaptopyruvate sulfurtransferase.                                 |          |
| 2572231964 | t3m_00320 | EC:2.8.1.1     | Thiosulfate sulfurtransferase.                                        |          |
| 2572231964 | t3m_00320 | KO:K01011      | thiosulfate/3-mercaptopyruvate sulfurtransferase [EC:2.8.1.1 2.8.1.2] | 0.00E+00 |
| 2572231964 | t3m_00320 | Locus_type     | CDS                                                                   |          |
| 2572231964 | t3m_00320 | Product_name   | Rhodanese-related sulfurtransferase                                   |          |
| 2572231964 | t3m_00320 | Scaffold       | t3m_contig_70_29_len_66924_read_count_5585863.4                       |          |
| 2572231964 | t3m_00320 | Coordinates    | 60378..61232(+)                                                       |          |
| 2572231964 | t3m_00320 | DNA_length     | 855bp                                                                 |          |
| 2572231964 | t3m_00320 | Protein_length | 284aa                                                                 |          |
| 2572231964 | t3m_00320 | GC             |                                                                       | 0.67     |
| 2572231965 | t3m_00321 | COG_category   | [E] Amino acid transport and metabolism                               |          |
| 2572231965 | t3m_00321 | COG0509        | Glycine cleavage system H protein (lipoate-binding)                   | 2.00E-17 |
| 2572231965 | t3m_00321 | pfam01597      | GCV_H                                                                 | 2.40E-15 |
| 2572231965 | t3m_00321 | pfam01206      | TusA                                                                  | 4.40E-08 |



|            |           |                |                                                                  |          |
|------------|-----------|----------------|------------------------------------------------------------------|----------|
| 2572231965 | t3m_00321 | Locus_type     | CDS                                                              |          |
| 2572231965 | t3m_00321 | Product_name   | Glycine cleavage system H protein (lipoate-binding)              |          |
| 2572231965 | t3m_00321 | Scaffold       | t3m_contig_70_29_len_66924_read_count_5585863.4                  |          |
| 2572231965 | t3m_00321 | Coordinates    | 61247..61942(-)                                                  |          |
| 2572231965 | t3m_00321 | DNA_length     | 696bp                                                            |          |
| 2572231965 | t3m_00321 | Protein_length | 231aa                                                            |          |
| 2572231965 | t3m_00321 | GC             |                                                                  | 0.7      |
|            |           |                |                                                                  |          |
| 2572231966 | t3m_00322 | COG_category   | [S] Function unknown                                             |          |
| 2572231966 | t3m_00322 | COG3832        | Uncharacterized conserved protein                                | 3.00E-08 |
| 2572231966 | t3m_00322 | pfam08327      | AHSA1                                                            | 8.80E-17 |
| 2572231966 | t3m_00322 | Locus_type     | CDS                                                              |          |
| 2572231966 | t3m_00322 | Product_name   | Uncharacterized conserved protein                                |          |
| 2572231966 | t3m_00322 | Scaffold       | t3m_contig_70_29_len_66924_read_count_5585863.4                  |          |
| 2572231966 | t3m_00322 | Coordinates    | 62238..62696(-)                                                  |          |
| 2572231966 | t3m_00322 | DNA_length     | 459bp                                                            |          |
| 2572231966 | t3m_00322 | Protein_length | 152aa                                                            |          |
| 2572231966 | t3m_00322 | GC             |                                                                  | 0.64     |
|            |           |                |                                                                  |          |
| 2572231967 | t3m_00323 | pfam05048      | NosD                                                             | 1.00E-07 |
| 2572231967 | t3m_00323 | pfam08308      | PEGA                                                             | 3.30E-05 |
| 2572231967 | t3m_00323 | pfam05317      | Thermopsin                                                       | 2.20E-57 |
| 2572231967 | t3m_00323 | EC:3.4.23.42   | Thermopsin.                                                      |          |
| 2572231967 | t3m_00323 | TIGR03804      | parallel beta-helix repeat (two copies)                          | 1.30E-07 |
| 2572231967 | t3m_00323 | KO:K01385      | thermopsin [EC:3.4.23.42]                                        | 0.00E+00 |
| 2572231967 | t3m_00323 | Locus_type     | CDS                                                              |          |
| 2572231967 | t3m_00323 | Product_name   | Periplasmic copper-binding protein (NosD)/PEGA domain/Thermopsin |          |
| 2572231967 | t3m_00323 | Scaffold       | t3m_contig_70_29_len_66924_read_count_5585863.4                  |          |
| 2572231967 | t3m_00323 | Coordinates    | 62875..66162(+)                                                  |          |
| 2572231967 | t3m_00323 | DNA_length     | 3288bp                                                           |          |
| 2572231967 | t3m_00323 | Protein_length | 1095aa                                                           |          |
| 2572231967 | t3m_00323 | GC             |                                                                  | 0.65     |
| 2572231967 | t3m_00323 | Transmembrane  | Yes                                                              |          |

|            |           |                |                                                                    |          |
|------------|-----------|----------------|--------------------------------------------------------------------|----------|
| 2572231968 | t3m_00324 | Locus_type     | CDS                                                                |          |
| 2572231968 | t3m_00324 | Product_name   | hypothetical protein                                               |          |
| 2572231968 | t3m_00324 | Scaffold       | t3m_contig_70_29_len_66924_read_count_5585863.4                    |          |
| 2572231968 | t3m_00324 | Coordinates    | 66399..66923(+)                                                    |          |
| 2572231968 | t3m_00324 | DNA_length     | 525bp                                                              |          |
| 2572231968 | t3m_00324 | Protein_length | 175aa                                                              |          |
| 2572231968 | t3m_00324 | GC             |                                                                    | 0.68     |
| 2572231968 | t3m_00324 | Transmembrane  | Yes                                                                |          |
|            |           |                |                                                                    |          |
| 2572231969 | t3m_00325 | Locus_type     | CDS                                                                |          |
| 2572231969 | t3m_00325 | Product_name   | hypothetical protein                                               |          |
| 2572231969 | t3m_00325 | Scaffold       | t3m_contig_70_42_len_55050_read_count_4293452.5                    |          |
| 2572231969 | t3m_00325 | Coordinates    | 2..223(-)                                                          |          |
| 2572231969 | t3m_00325 | DNA_length     | 222bp                                                              |          |
| 2572231969 | t3m_00325 | Protein_length | 74aa                                                               |          |
| 2572231969 | t3m_00325 | GC             |                                                                    | 0.63     |
|            |           |                |                                                                    |          |
| 2572231970 | t3m_00326 | COG_category   | [G] Carbohydrate transport and metabolism                          |          |
| 2572231970 | t3m_00326 | COG2211        | Na <sup>+</sup> /melibiose symporter and related transporters      | 5.00E-08 |
| 2572231970 | t3m_00326 | pfam07690      | MFS_1                                                              | 1.50E-33 |
| 2572231970 | t3m_00326 | Locus_type     | CDS                                                                |          |
| 2572231970 | t3m_00326 | Product_name   | Major Facilitator Superfamily                                      |          |
| 2572231970 | t3m_00326 | Scaffold       | t3m_contig_70_42_len_55050_read_count_4293452.5                    |          |
| 2572231970 | t3m_00326 | Coordinates    | 298..1548(+)                                                       |          |
| 2572231970 | t3m_00326 | DNA_length     | 1251bp                                                             |          |
| 2572231970 | t3m_00326 | Protein_length | 416aa                                                              |          |
| 2572231970 | t3m_00326 | GC             |                                                                    | 0.69     |
| 2572231970 | t3m_00326 | Transmembrane  | Yes                                                                |          |
|            |           |                |                                                                    |          |
| 2572231971 | t3m_00327 | KEGG_module    | M00254: ABC-2 type transport system                                |          |
| 2572231971 | t3m_00327 | COG_category   | [R] General function prediction only                               |          |
| 2572231971 | t3m_00327 | COG1277        | ABC-type transport system involved in multi-copper enzyme maturati | 5.00E-08 |
| 2572231971 | t3m_00327 | pfam12730      | ABC2_membrane_4                                                    | 6.50E-20 |
| 2572231971 | t3m_00327 | KO:K01992      | ABC-2 type transport system permease protein                       | 4.20E-41 |

|            |           |                |                                                                      |          |
|------------|-----------|----------------|----------------------------------------------------------------------|----------|
| 2572231971 | t3m_00327 | Locus_type     | CDS                                                                  |          |
| 2572231971 | t3m_00327 | Product_name   | ABC-type transport system involved in multi-copper enzyme maturation |          |
| 2572231971 | t3m_00327 | Scaffold       | t3m_contig_70_42_len_55050_read_count_4293452.5                      |          |
| 2572231971 | t3m_00327 | Coordinates    | 1571..2464(-)                                                        |          |
| 2572231971 | t3m_00327 | DNA_length     | 894bp                                                                |          |
| 2572231971 | t3m_00327 | Protein_length | 297aa                                                                |          |
| 2572231971 | t3m_00327 | GC             |                                                                      | 0.65     |
| 2572231971 | t3m_00327 | Transmembrane  | Yes                                                                  |          |
| 2572231972 | t3m_00328 | KEGG_module    | M00254: ABC-2 type transport system                                  |          |
| 2572231972 | t3m_00328 | COG_category   | [V] Defense mechanisms                                               |          |
| 2572231972 | t3m_00328 | COG1131        | ABC-type multidrug transport system, ATPase component                | 4.00E-61 |
| 2572231972 | t3m_00328 | pfam00005      | ABC_tran                                                             | 1.80E-26 |
| 2572231972 | t3m_00328 | KO:K01990      | ABC-2 type transport system ATP-binding protein                      | 0.00E+00 |
| 2572231972 | t3m_00328 | Locus_type     | CDS                                                                  |          |
| 2572231972 | t3m_00328 | Product_name   | ABC-type multidrug transport system, ATPase component                |          |
| 2572231972 | t3m_00328 | Scaffold       | t3m_contig_70_42_len_55050_read_count_4293452.5                      |          |
| 2572231972 | t3m_00328 | Coordinates    | 2461..3408(-)                                                        |          |
| 2572231972 | t3m_00328 | DNA_length     | 948bp                                                                |          |
| 2572231972 | t3m_00328 | Protein_length | 315aa                                                                |          |
| 2572231972 | t3m_00328 | GC             |                                                                      | 0.66     |
| 2572231973 | t3m_00329 | COG_category   | [P] Inorganic ion transport and metabolism                           |          |
| 2572231973 | t3m_00329 | COG2217        | Cation transport ATPase                                              | 0.00E+00 |
| 2572231973 | t3m_00329 | pfam00702      | Hydrolase                                                            | 2.60E-41 |
| 2572231973 | t3m_00329 | pfam00122      | E1-E2_ATPase                                                         | 7.70E-49 |
| 2572231973 | t3m_00329 | pfam04945      | YHS                                                                  | 8.20E-10 |
| 2572231973 | t3m_00329 | EC:3.6.3.4     | Copper-exporting ATPase.                                             |          |
| 2572231973 | t3m_00329 | TIGR01511      | copper-(or silver)-translocating P-type ATPase                       | 0.00E+00 |
| 2572231973 | t3m_00329 | TIGR01525      | heavy metal translocating P-type ATPase                              | 0.00E+00 |
| 2572231973 | t3m_00329 | TIGR01494      | ATPase, P-type (transporting), HAD superfamily, subfamily IC         | 8.30E-43 |
| 2572231973 | t3m_00329 | KO:K01533      | Cu <sup>2+</sup> -exporting ATPase [EC:3.6.3.4]                      | 0.00E+00 |
| 2572231973 | t3m_00329 | Locus_type     | CDS                                                                  |          |
| 2572231973 | t3m_00329 | Product_name   | copper-(or silver)-translocating P-type ATPase                       |          |

|            |           |                |                                            |                                                 |          |
|------------|-----------|----------------|--------------------------------------------|-------------------------------------------------|----------|
| 2572231973 | t3m_00329 | Scaffold       |                                            | t3m_contig_70_42_len_55050_read_count_4293452.5 |          |
| 2572231973 | t3m_00329 | Coordinates    |                                            | 3460..5574(-)                                   |          |
| 2572231973 | t3m_00329 | DNA_length     |                                            | 2115bp                                          |          |
| 2572231973 | t3m_00329 | Protein_length |                                            | 704aa                                           |          |
| 2572231973 | t3m_00329 | GC             |                                            |                                                 | 0.69     |
| 2572231973 | t3m_00329 | Transmembrane  |                                            | Yes                                             |          |
| 2572231974 | t3m_00330 | COG_category   | [S] Function unknown                       |                                                 |          |
| 2572231974 | t3m_00330 | COG3350        | Uncharacterized conserved protein          |                                                 | 8.00E-07 |
| 2572231974 | t3m_00330 | pfam04945      | YHS                                        |                                                 | 2.10E-08 |
| 2572231974 | t3m_00330 | Locus_type     |                                            | CDS                                             |          |
| 2572231974 | t3m_00330 | Product_name   |                                            | Uncharacterized conserved protein               |          |
| 2572231974 | t3m_00330 | Scaffold       |                                            | t3m_contig_70_42_len_55050_read_count_4293452.5 |          |
| 2572231974 | t3m_00330 | Coordinates    |                                            | 5617..5799(-)                                   |          |
| 2572231974 | t3m_00330 | DNA_length     |                                            | 183bp                                           |          |
| 2572231974 | t3m_00330 | Protein_length |                                            | 60aa                                            |          |
| 2572231974 | t3m_00330 | GC             |                                            |                                                 | 0.67     |
| 2572231975 | t3m_00331 | COG_category   | [P] Inorganic ion transport and metabolism |                                                 |          |
| 2572231975 | t3m_00331 | COG0607        | Rhodanese-related sulfurtransferase        |                                                 | 2.00E-17 |
| 2572231975 | t3m_00331 | pfam00581      | Rhodanese                                  |                                                 | 4.90E-14 |
| 2572231975 | t3m_00331 | Locus_type     |                                            | CDS                                             |          |
| 2572231975 | t3m_00331 | Product_name   |                                            | Rhodanese-related sulfurtransferase             |          |
| 2572231975 | t3m_00331 | Scaffold       |                                            | t3m_contig_70_42_len_55050_read_count_4293452.5 |          |
| 2572231975 | t3m_00331 | Coordinates    |                                            | 5868..6194(+)                                   |          |
| 2572231975 | t3m_00331 | DNA_length     |                                            | 327bp                                           |          |
| 2572231975 | t3m_00331 | Protein_length |                                            | 108aa                                           |          |
| 2572231975 | t3m_00331 | GC             |                                            |                                                 | 0.67     |
| 2572231976 | t3m_00332 | pfam14947      | HTH_45                                     |                                                 | 3.80E-09 |
| 2572231976 | t3m_00332 | Locus_type     |                                            | CDS                                             |          |
| 2572231976 | t3m_00332 | Product_name   |                                            | Winged helix-turn-helix                         |          |
| 2572231976 | t3m_00332 | Scaffold       |                                            | t3m_contig_70_42_len_55050_read_count_4293452.5 |          |
| 2572231976 | t3m_00332 | Coordinates    |                                            | 6260..6550(-)                                   |          |

|            |           |                |                                                       |           |
|------------|-----------|----------------|-------------------------------------------------------|-----------|
| 2572231976 | t3m_00332 | DNA_length     | 291bp                                                 |           |
| 2572231976 | t3m_00332 | Protein_length | 96aa                                                  |           |
| 2572231976 | t3m_00332 | GC             |                                                       | 0.65      |
| 2572231977 | t3m_00333 | Locus_type     | CDS                                                   |           |
| 2572231977 | t3m_00333 | Product_name   | hypothetical protein                                  |           |
| 2572231977 | t3m_00333 | Scaffold       | t3m_contig_70_42_len_55050_read_count_4293452.5       |           |
| 2572231977 | t3m_00333 | Coordinates    | 6604..7845(-)                                         |           |
| 2572231977 | t3m_00333 | DNA_length     | 1242bp                                                |           |
| 2572231977 | t3m_00333 | Protein_length | 413aa                                                 |           |
| 2572231977 | t3m_00333 | GC             |                                                       | 0.69      |
| 2572231978 | t3m_00334 | COG_category   | [L] Replication, recombination and repair             |           |
| 2572231978 | t3m_00334 | COG1573        | Uracil-DNA glycosylase                                | 2.00E-25  |
| 2572231978 | t3m_00334 | pfam03167      | UDG                                                   | 6.70E-29  |
| 2572231978 | t3m_00334 | TIGR00758      | uracil-DNA glycosylase, family 4                      | 3.80E-16  |
| 2572231978 | t3m_00334 | Locus_type     | CDS                                                   |           |
| 2572231978 | t3m_00334 | Product_name   | Uracil-DNA glycosylase                                |           |
| 2572231978 | t3m_00334 | Scaffold       | t3m_contig_70_42_len_55050_read_count_4293452.5       |           |
| 2572231978 | t3m_00334 | Coordinates    | 7934..8647(+)                                         |           |
| 2572231978 | t3m_00334 | DNA_length     | 714bp                                                 |           |
| 2572231978 | t3m_00334 | Protein_length | 237aa                                                 |           |
| 2572231978 | t3m_00334 | GC             |                                                       | 0.73      |
| 2572231979 | t3m_00335 | Metacyc        | PWY-6700: queuosine biosynthesis                      |           |
| 2572231979 | t3m_00335 | COG_category   | [J] Translation, ribosomal structure and biogenesis   |           |
| 2572231979 | t3m_00335 | COG0343        | Queuine/archaeosine tRNA-ribosyltransferase           | 3.00E-76  |
| 2572231979 | t3m_00335 | pfam01702      | TGT                                                   | 2.40E-37  |
| 2572231979 | t3m_00335 | pfam01472      | PUA                                                   | 1.00E-08  |
| 2572231979 | t3m_00335 | EC:2.4.2.29    | tRNA-guanine(34) transglycosylase.                    |           |
| 2572231979 | t3m_00335 | TIGR00432      | tRNA-guanine transglycosylase, archaeosine-15-forming | 4.70E-113 |
| 2572231979 | t3m_00335 | TIGR00449      | tRNA-guanine family transglycosylase                  | 1.00E-72  |
| 2572231979 | t3m_00335 | TIGR00451      | uncharacterized domain 2                              | 3.80E-10  |
| 2572231979 | t3m_00335 | KO:K00773      | queuine tRNA-ribosyltransferase [EC:2.4.2.29]         | 0.00E+00  |

|            |           |                |                                                                  |          |
|------------|-----------|----------------|------------------------------------------------------------------|----------|
| 2572231979 | t3m_00335 | Locus_type     | CDS                                                              |          |
| 2572231979 | t3m_00335 | Product_name   | tRNA-guanine family transglycosylase                             |          |
| 2572231979 | t3m_00335 | Scaffold       | t3m_contig_70_42_len_55050_read_count_4293452.5                  |          |
| 2572231979 | t3m_00335 | Coordinates    | 8675..10594(+)                                                   |          |
| 2572231979 | t3m_00335 | DNA_length     | 1920bp                                                           |          |
| 2572231979 | t3m_00335 | Protein_length | 639aa                                                            |          |
| 2572231979 | t3m_00335 | GC             |                                                                  | 0.72     |
| 2572231979 | t3m_00335 | Fused_gene     | Yes                                                              |          |
|            |           |                |                                                                  |          |
| 2572231980 | t3m_00336 | Locus_type     | CDS                                                              |          |
| 2572231980 | t3m_00336 | Product_name   | hypothetical protein                                             |          |
| 2572231980 | t3m_00336 | Scaffold       | t3m_contig_70_42_len_55050_read_count_4293452.5                  |          |
| 2572231980 | t3m_00336 | Coordinates    | 10692..10922(+)                                                  |          |
| 2572231980 | t3m_00336 | DNA_length     | 231bp                                                            |          |
| 2572231980 | t3m_00336 | Protein_length | 76aa                                                             |          |
| 2572231980 | t3m_00336 | GC             |                                                                  | 0.65     |
|            |           |                |                                                                  |          |
| 2572231981 | t3m_00337 | COG_category   | [O] Posttranslational modification, protein turnover, chaperones |          |
| 2572231981 | t3m_00337 | COG0533        | Metal-dependent proteases with possible chaperone activity       | 1.00E-95 |
| 2572231981 | t3m_00337 | pfam00814      | Peptidase_M22                                                    | 4.10E-78 |
| 2572231981 | t3m_00337 | TIGR03722      | universal archaeal protein Kae1                                  | 0.00E+00 |
| 2572231981 | t3m_00337 | TIGR00329      | metallohydrolase, glycoprotease/Kae1 family                      | 3.00E-87 |
| 2572231981 | t3m_00337 | KO:K15900      | tRNA threonylcarbamoyladenosine biosynthesis protein             | 0.00E+00 |
| 2572231981 | t3m_00337 | Locus_type     | CDS                                                              |          |
| 2572231981 | t3m_00337 | Product_name   | O-sialoglycoprotein endopeptidase (EC 3.4.24.57)                 |          |
| 2572231981 | t3m_00337 | Scaffold       | t3m_contig_70_42_len_55050_read_count_4293452.5                  |          |
| 2572231981 | t3m_00337 | Coordinates    | 10980..11966(+)                                                  |          |
| 2572231981 | t3m_00337 | DNA_length     | 987bp                                                            |          |
| 2572231981 | t3m_00337 | Protein_length | 328aa                                                            |          |
| 2572231981 | t3m_00337 | GC             |                                                                  | 0.71     |
|            |           |                |                                                                  |          |
| 2572231982 | t3m_00338 | COG_category   | [C] Energy production and conversion                             |          |
| 2572231982 | t3m_00338 | COG0644        | Dehydrogenases (flavoproteins)                                   | 1.00E-58 |
| 2572231982 | t3m_00338 | pfam01494      | FAD_binding_3                                                    | 2.60E-18 |

|            |           |                |                                                                  |           |
|------------|-----------|----------------|------------------------------------------------------------------|-----------|
| 2572231982 | t3m_00338 | TIGR02032      | geranylgeranyl reductase family                                  | 5.10E-71  |
| 2572231982 | t3m_00338 | Locus_type     | CDS                                                              |           |
| 2572231982 | t3m_00338 | Product_name   | geranylgeranyl reductase family                                  |           |
| 2572231982 | t3m_00338 | Scaffold       | t3m_contig_70_42_len_55050_read_count_4293452.5                  |           |
| 2572231982 | t3m_00338 | Coordinates    | 12007..13251(+)                                                  |           |
| 2572231982 | t3m_00338 | DNA_length     | 1245bp                                                           |           |
| 2572231982 | t3m_00338 | Protein_length | 414aa                                                            |           |
| 2572231982 | t3m_00338 | GC             |                                                                  | 0.7       |
| 2572231983 | t3m_00339 | Locus_type     | CDS                                                              |           |
| 2572231983 | t3m_00339 | Product_name   | hypothetical protein                                             |           |
| 2572231983 | t3m_00339 | Scaffold       | t3m_contig_70_42_len_55050_read_count_4293452.5                  |           |
| 2572231983 | t3m_00339 | Coordinates    | 13209..13964(-)                                                  |           |
| 2572231983 | t3m_00339 | DNA_length     | 756bp                                                            |           |
| 2572231983 | t3m_00339 | Protein_length | 251aa                                                            |           |
| 2572231983 | t3m_00339 | GC             |                                                                  | 0.7       |
| 2572231983 | t3m_00339 | Transmembrane  | Yes                                                              |           |
| 2572231984 | t3m_00340 | KEGG_module    | M00338: Cysteine biosynthesis, homocysteine + serine => cysteine |           |
| 2572231984 | t3m_00340 | KEGG_module    | M00035: Methionine degradation                                   |           |
| 2572231984 | t3m_00340 | Metacyc        | HOMOCYSDEGR-PWY: cysteine biosynthesis/homocysteine degradation  |           |
| 2572231984 | t3m_00340 | Metacyc        | PWY-801: homocysteine and cysteine interconversion               |           |
| 2572231984 | t3m_00340 | COG_category   | [E] Amino acid transport and metabolism                          |           |
| 2572231984 | t3m_00340 | COG0031        | Cysteine synthase                                                | 4.00E-101 |
| 2572231984 | t3m_00340 | pfam00571      | CBS                                                              | 1.90E-07  |
| 2572231984 | t3m_00340 | pfam00571      | CBS                                                              | 4.60E-08  |
| 2572231984 | t3m_00340 | pfam00291      | PALP                                                             | 9.90E-68  |
| 2572231984 | t3m_00340 | EC:4.2.1.22    | Cystathionine beta-synthase.                                     |           |
| 2572231984 | t3m_00340 | TIGR01137      | cystathionine beta-synthase                                      | 0.00E+00  |
| 2572231984 | t3m_00340 | KO:K01697      | cystathionine beta-synthase [EC:4.2.1.22]                        | 0.00E+00  |
| 2572231984 | t3m_00340 | Locus_type     | CDS                                                              |           |
| 2572231984 | t3m_00340 | Product_name   | Cysteine synthase                                                |           |
| 2572231984 | t3m_00340 | Scaffold       | t3m_contig_70_42_len_55050_read_count_4293452.5                  |           |
| 2572231984 | t3m_00340 | Coordinates    | 14206..15606(+)                                                  |           |

|            |           |                |                                                                  |           |
|------------|-----------|----------------|------------------------------------------------------------------|-----------|
| 2572231984 | t3m_00340 | DNA_length     | 1401bp                                                           |           |
| 2572231984 | t3m_00340 | Protein_length | 466aa                                                            |           |
| 2572231984 | t3m_00340 | GC             |                                                                  | 0.68      |
| 2572231985 | t3m_00341 | KEGG_module    | M00338: Cysteine biosynthesis, homocysteine + serine => cysteine |           |
| 2572231985 | t3m_00341 | Metacyc        | LCYSDEG-PWY: L-cysteine degradation II                           |           |
| 2572231985 | t3m_00341 | Metacyc        | HOMOCYSDEGR-PWY: cysteine biosynthesis/homocysteine degradation  |           |
| 2572231985 | t3m_00341 | Metacyc        | PWY-801: homocysteine and cysteine interconversion               |           |
| 2572231985 | t3m_00341 | IMG_pathway    | 197: L-cysteine degradation to pyruvate                          |           |
| 2572231985 | t3m_00341 | IMG_pathway    | 517: L-cysteine synthesis from L-cystathionine                   |           |
| 2572231985 | t3m_00341 | COG_category   | [E] Amino acid transport and metabolism                          |           |
| 2572231985 | t3m_00341 | COG0626        | Cystathionine beta-lyases/cystathionine gamma-synthases          | 5.00E-129 |
| 2572231985 | t3m_00341 | pfam01053      | Cys_Met_Meta_PP                                                  | 0.00E+00  |
| 2572231985 | t3m_00341 | EC:4.4.1.1     | Cystathionine gamma-lyase.                                       |           |
| 2572231985 | t3m_00341 | KO:K01758      | cystathionine gamma-lyase [EC:4.4.1.1]                           | 0.00E+00  |
| 2572231985 | t3m_00341 | ITERM:00511    | cystathionine gamma-lyase (EC 4.4.1.1)                           |           |
| 2572231985 | t3m_00341 | Locus_type     | CDS                                                              |           |
| 2572231985 | t3m_00341 | Product_name   | cystathionine gamma-lyase (EC 4.4.1.1)                           |           |
| 2572231985 | t3m_00341 | Scaffold       | t3m_contig_70_42_len_55050_read_count_4293452.5                  |           |
| 2572231985 | t3m_00341 | Coordinates    | 15596..16738(+)                                                  |           |
| 2572231985 | t3m_00341 | DNA_length     | 1143bp                                                           |           |
| 2572231985 | t3m_00341 | Protein_length | 380aa                                                            |           |
| 2572231985 | t3m_00341 | GC             |                                                                  | 0.7       |
| 2572231986 | t3m_00342 | KEGG_module    | M00359: Aminoacyl-tRNA biosynthesis, eukaryotes                  |           |
| 2572231986 | t3m_00342 | KEGG_module    | M00360: Aminoacyl-tRNA biosynthesis, prokaryotes                 |           |
| 2572231986 | t3m_00342 | Metacyc        | TRNA-CHARGING-PWY: tRNA charging                                 |           |
| 2572231986 | t3m_00342 | IMG_pathway    | 488: L-cysteine ligation to tRNA(Cys)                            |           |
| 2572231986 | t3m_00342 | COG_category   | [J] Translation, ribosomal structure and biogenesis              |           |
| 2572231986 | t3m_00342 | COG0215        | Cysteinyl-tRNA synthetase                                        | 0.00E+00  |
| 2572231986 | t3m_00342 | pfam01406      | tRNA-synt_1e                                                     | 8.30E-98  |
| 2572231986 | t3m_00342 | pfam09190      | DALR_2                                                           | 6.60E-07  |
| 2572231986 | t3m_00342 | EC:6.1.1.16    | Cysteine--tRNA ligase.                                           |           |
| 2572231986 | t3m_00342 | TIGR00435      | cysteinyl-tRNA synthetase                                        | 7.00E-125 |



|            |           |                |                                                    |          |
|------------|-----------|----------------|----------------------------------------------------|----------|
| 2572231986 | t3m_00342 | KO:K01883      | cysteinyI-tRNA synthetase [EC:6.1.1.16]            | 0.00E+00 |
| 2572231986 | t3m_00342 | ITERM:00404    | cysteinyI-tRNA synthetase (EC 6.1.1.16)            |          |
| 2572231986 | t3m_00342 | Locus_type     | CDS                                                |          |
| 2572231986 | t3m_00342 | Product_name   | cysteinyI-tRNA synthetase (EC 6.1.1.16)            |          |
| 2572231986 | t3m_00342 | Scaffold       | t3m_contig_70_42_len_55050_read_count_4293452.5    |          |
| 2572231986 | t3m_00342 | Coordinates    | 16741..18183(+)                                    |          |
| 2572231986 | t3m_00342 | DNA_length     | 1443bp                                             |          |
| 2572231986 | t3m_00342 | Protein_length | 480aa                                              |          |
| 2572231986 | t3m_00342 | GC             |                                                    | 0.7      |
| 2572231987 | t3m_00343 | COG_category   | [R] General function prediction only               |          |
| 2572231987 | t3m_00343 | COG1064        | Zn-dependent alcohol dehydrogenases                | 3.00E-61 |
| 2572231987 | t3m_00343 | pfam08240      | ADH_N                                              | 4.80E-24 |
| 2572231987 | t3m_00343 | pfam00107      | ADH_zinc_N                                         | 1.60E-31 |
| 2572231987 | t3m_00343 | Locus_type     | CDS                                                |          |
| 2572231987 | t3m_00343 | Product_name   | Zn-dependent alcohol dehydrogenases                |          |
| 2572231987 | t3m_00343 | Scaffold       | t3m_contig_70_42_len_55050_read_count_4293452.5    |          |
| 2572231987 | t3m_00343 | Coordinates    | 18190..19230(+)                                    |          |
| 2572231987 | t3m_00343 | DNA_length     | 1041bp                                             |          |
| 2572231987 | t3m_00343 | Protein_length | 346aa                                              |          |
| 2572231987 | t3m_00343 | GC             |                                                    | 0.71     |
| 2572231988 | t3m_00344 | pfam12773      | DZR                                                | 1.20E-07 |
| 2572231988 | t3m_00344 | Locus_type     | CDS                                                |          |
| 2572231988 | t3m_00344 | Product_name   | Double zinc ribbon                                 |          |
| 2572231988 | t3m_00344 | Scaffold       | t3m_contig_70_42_len_55050_read_count_4293452.5    |          |
| 2572231988 | t3m_00344 | Coordinates    | 19384..23055(+)                                    |          |
| 2572231988 | t3m_00344 | DNA_length     | 3672bp                                             |          |
| 2572231988 | t3m_00344 | Protein_length | 1223aa                                             |          |
| 2572231988 | t3m_00344 | GC             |                                                    | 0.66     |
| 2572231988 | t3m_00344 | Transmembrane  | Yes                                                |          |
| 2572231989 | t3m_00345 | KEGG_module    | M00035: Methionine degradation                     |          |
| 2572231989 | t3m_00345 | Metacyc        | PWY-5041: <i>S</i> -adenosyl-L-methionine cycle II |          |

|            |           |                |                                                                 |          |
|------------|-----------|----------------|-----------------------------------------------------------------|----------|
| 2572231989 | t3m_00345 | Metacyc        | METHIONINE-DEG1-PWY: methionine degradation I (to homocysteine) |          |
| 2572231989 | t3m_00345 | IMG_pathway    | 398: S-adenosyl-L-homocysteine hydrolysis                       |          |
| 2572231989 | t3m_00345 | COG_category   | [H] Coenzyme transport and metabolism                           |          |
| 2572231989 | t3m_00345 | COG0499        | S-adenosylhomocysteine hydrolase                                | 0.00E+00 |
| 2572231989 | t3m_00345 | pfam05221      | AdoHcyase                                                       | 1.20E-52 |
| 2572231989 | t3m_00345 | pfam00670      | AdoHcyase_NAD                                                   | 4.00E-50 |
| 2572231989 | t3m_00345 | EC:3.3.1.1     | Adenosylhomocysteinase.                                         |          |
| 2572231989 | t3m_00345 | TIGR00936      | adenosylhomocysteinase                                          | 0.00E+00 |
| 2572231989 | t3m_00345 | KO:K01251      | adenosylhomocysteinase [EC:3.3.1.1]                             | 0.00E+00 |
| 2572231989 | t3m_00345 | ITERM:01674    | adenosylhomocysteinase (EC 3.3.1.1)                             |          |
| 2572231989 | t3m_00345 | Locus_type     | CDS                                                             |          |
| 2572231989 | t3m_00345 | Product_name   | adenosylhomocysteinase (EC 3.3.1.1)                             |          |
| 2572231989 | t3m_00345 | Scaffold       | t3m_contig_70_42_len_55050_read_count_4293452.5                 |          |
| 2572231989 | t3m_00345 | Coordinates    | 23135..24370(+)                                                 |          |
| 2572231989 | t3m_00345 | DNA_length     | 1236bp                                                          |          |
| 2572231989 | t3m_00345 | Protein_length | 411aa                                                           |          |
| 2572231989 | t3m_00345 | GC             |                                                                 | 0.7      |
| 2572231990 | t3m_00346 | KEGG_module    | M00532: Photorespiration                                        |          |
| 2572231990 | t3m_00346 | COG_category   | [E] Amino acid transport and metabolism                         |          |
| 2572231990 | t3m_00346 | COG0509        | Glycine cleavage system H protein (lipoate-binding)             | 1.00E-34 |
| 2572231990 | t3m_00346 | pfam01597      | GCV_H                                                           | 5.80E-39 |
| 2572231990 | t3m_00346 | TIGR00527      | glycine cleavage system H protein                               | 1.90E-42 |
| 2572231990 | t3m_00346 | KO:K02437      | glycine cleavage system H protein                               | 6.00E-31 |
| 2572231990 | t3m_00346 | Locus_type     | CDS                                                             |          |
| 2572231990 | t3m_00346 | Product_name   | glycine cleavage system H protein                               |          |
| 2572231990 | t3m_00346 | Scaffold       | t3m_contig_70_42_len_55050_read_count_4293452.5                 |          |
| 2572231990 | t3m_00346 | Coordinates    | 24367..24762(+)                                                 |          |
| 2572231990 | t3m_00346 | DNA_length     | 396bp                                                           |          |
| 2572231990 | t3m_00346 | Protein_length | 131aa                                                           |          |
| 2572231990 | t3m_00346 | GC             |                                                                 | 0.66     |
| 2572231991 | t3m_00347 | KEGG_module    | M00173: Reductive citric acid cycle (Arnon-Buchanan cycle)      |          |
| 2572231991 | t3m_00347 | KEGG_module    | M00374: Dicarboxylate-hydroxybutyrate cycle                     |          |

|            |           |                |                                                          |           |
|------------|-----------|----------------|----------------------------------------------------------|-----------|
| 2572231991 | t3m_00347 | Metacyc        | GLYCOLYSIS: glycolysis I                                 |           |
| 2572231991 | t3m_00347 | Metacyc        | PWY-5484: glycolysis II (from fructose-6P)               |           |
| 2572231991 | t3m_00347 | Metacyc        | P23-PWY: reductive TCA cycle I                           |           |
| 2572231991 | t3m_00347 | Metacyc        | GLUCONEO-PWY: gluconeogenesis I                          |           |
| 2572231991 | t3m_00347 | IMG_pathway    | 1014: Dicarboxylate/4-hydroxybutyrate cycle              |           |
| 2572231991 | t3m_00347 | IMG_pathway    | 289: Oxaloacetate synthesis via phosphoenolpyruvate      |           |
| 2572231991 | t3m_00347 | COG_category   | [G] Carbohydrate transport and metabolism                |           |
| 2572231991 | t3m_00347 | COG0574        | Phosphoenolpyruvate synthase/pyruvate phosphate dikinase | 0.00E+00  |
| 2572231991 | t3m_00347 | pfam01326      | PPDK_N                                                   | 2.30E-100 |
| 2572231991 | t3m_00347 | pfam02896      | PEP-utilizers_C                                          | 1.90E-69  |
| 2572231991 | t3m_00347 | pfam00391      | PEP-utilizers                                            | 1.50E-27  |
| 2572231991 | t3m_00347 | EC:2.7.9.2     | Pyruvate, water dikinase.                                |           |
| 2572231991 | t3m_00347 | TIGR01418      | phosphoenolpyruvate synthase                             | 0.00E+00  |
| 2572231991 | t3m_00347 | KO:K01007      | pyruvate, water dikinase [EC:2.7.9.2]                    | 0.00E+00  |
| 2572231991 | t3m_00347 | ITERM:00814    | phosphoenolpyruvate synthase (EC 2.7.9.2)                |           |
| 2572231991 | t3m_00347 | Locus_type     | CDS                                                      |           |
| 2572231991 | t3m_00347 | Product_name   | phosphoenolpyruvate synthase (EC 2.7.9.2)                |           |
| 2572231991 | t3m_00347 | Scaffold       | t3m_contig_70_42_len_55050_read_count_4293452.5          |           |
| 2572231991 | t3m_00347 | Coordinates    | 24860..27184(-)                                          |           |
| 2572231991 | t3m_00347 | DNA_length     | 2325bp                                                   |           |
| 2572231991 | t3m_00347 | Protein_length | 774aa                                                    |           |
| 2572231991 | t3m_00347 | GC             |                                                          | 0.68      |
| 2572231992 | t3m_00348 | COG_category   | [R] General function prediction only                     |           |
| 2572231992 | t3m_00348 | COG2520        | Predicted methyltransferase                              | 4.00E-60  |
| 2572231992 | t3m_00348 | pfam02475      | Met_10                                                   | 1.70E-42  |
| 2572231992 | t3m_00348 | EC:2.1.1.228   | tRNA (guanine(37)-N(1))-methyltransferase.               |           |
| 2572231992 | t3m_00348 | KO:K15429      | tRNA (guanine37-N1)-methyltransferase [EC:2.1.1.228]     | 0.00E+00  |
| 2572231992 | t3m_00348 | Locus_type     | CDS                                                      |           |
| 2572231992 | t3m_00348 | Product_name   | Predicted methyltransferase                              |           |
| 2572231992 | t3m_00348 | Scaffold       | t3m_contig_70_42_len_55050_read_count_4293452.5          |           |
| 2572231992 | t3m_00348 | Coordinates    | 27213..28235(-)                                          |           |
| 2572231992 | t3m_00348 | DNA_length     | 1023bp                                                   |           |
| 2572231992 | t3m_00348 | Protein_length | 340aa                                                    |           |

|            |           |                |                                                                            |          |
|------------|-----------|----------------|----------------------------------------------------------------------------|----------|
| 2572231992 | t3m_00348 | GC             |                                                                            | 0.69     |
| 2572231993 | t3m_00349 | KEGG_module    | M00002: Glycolysis, core module involving three-carbon compounds           |          |
| 2572231993 | t3m_00349 | Metacyc        | PWY-6886: 1-butanol autotrophic biosynthesis                               |          |
| 2572231993 | t3m_00349 | Metacyc        | PWY-7124: ethylene biosynthesis V                                          |          |
| 2572231993 | t3m_00349 | Metacyc        | ANAGLYCOLYSIS-PWY: glycolysis III (glucokinase)                            |          |
| 2572231993 | t3m_00349 | Metacyc        | P341-PWY: glycolysis V (Pyrococcus)                                        |          |
| 2572231993 | t3m_00349 | Metacyc        | PWY-6901: xylose degradation IV                                            |          |
| 2572231993 | t3m_00349 | Metacyc        | PWY-7003: glycerol degradation to butanol                                  |          |
| 2572231993 | t3m_00349 | Metacyc        | PWY-2221: Entner-Doudoroff pathway III (semi-phosphorylative)              |          |
| 2572231993 | t3m_00349 | Metacyc        | PWY-1622: formaldehyde assimilation I (serine pathway)                     |          |
| 2572231993 | t3m_00349 | Metacyc        | GLUCONEO-PWY: gluconeogenesis I                                            |          |
| 2572231993 | t3m_00349 | Metacyc        | PWY-5723: Rubisco shunt                                                    |          |
| 2572231993 | t3m_00349 | Metacyc        | PWY-5484: glycolysis II (from fructose-6P)                                 |          |
| 2572231993 | t3m_00349 | Metacyc        | GLYCOLYSIS: glycolysis I                                                   |          |
| 2572231993 | t3m_00349 | Metacyc        | P124-PWY: Bifidobacterium shunt                                            |          |
| 2572231993 | t3m_00349 | Metacyc        | PWY-6142: gluconeogenesis II (<i>Methanobacterium thermoautotrophicum</i>) |          |
| 2572231993 | t3m_00349 | Metacyc        | PWY-1042: glycolysis IV (plant cytosol)                                    |          |
| 2572231993 | t3m_00349 | Metacyc        | P122-PWY: heterolactic fermentation                                        |          |
| 2572231993 | t3m_00349 | COG_category   | [G] Carbohydrate transport and metabolism                                  |          |
| 2572231993 | t3m_00349 | COG3635        | Predicted phosphoglycerate mutase, AP superfamily                          | 6.00E-91 |
| 2572231993 | t3m_00349 | pfam10143      | PhosphMutase                                                               | 1.40E-39 |
| 2572231993 | t3m_00349 | pfam01676      | Metalloenzyme                                                              | 1.20E-27 |
| 2572231993 | t3m_00349 | EC:5.4.2.1     | Phosphoglycerate mutase.                                                   |          |
| 2572231993 | t3m_00349 | TIGR00306      | 2,3-bisphosphoglycerate-independent phosphoglycerate mutase, archa         | 6.40E-95 |
| 2572231993 | t3m_00349 | KO:K15635      | 2,3-bisphosphoglycerate-independent phosphoglycerate mutase [EC:5.4.2.1]   | 0.00E+00 |
| 2572231993 | t3m_00349 | Locus_type     | CDS                                                                        |          |
| 2572231993 | t3m_00349 | Product_name   | 2,3-bisphosphoglycerate-independent phosphoglycerate mutase, archae        |          |
| 2572231993 | t3m_00349 | Scaffold       | t3m_contig_70_42_len_55050_read_count_4293452.5                            |          |
| 2572231993 | t3m_00349 | Coordinates    | 28232..29563(-)                                                            |          |
| 2572231993 | t3m_00349 | DNA_length     | 1332bp                                                                     |          |
| 2572231993 | t3m_00349 | Protein_length | 443aa                                                                      |          |
| 2572231993 | t3m_00349 | GC             |                                                                            | 0.71     |

|            |           |                |         |                                                 |          |
|------------|-----------|----------------|---------|-------------------------------------------------|----------|
| 2572231994 | t3m_00350 | Locus_type     |         | CDS                                             |          |
| 2572231994 | t3m_00350 | Product_name   |         | hypothetical protein                            |          |
| 2572231994 | t3m_00350 | Scaffold       |         | t3m_contig_70_42_len_55050_read_count_4293452.5 |          |
| 2572231994 | t3m_00350 | Coordinates    |         | 29601..30722(+)                                 |          |
| 2572231994 | t3m_00350 | DNA_length     |         | 1122bp                                          |          |
| 2572231994 | t3m_00350 | Protein_length |         | 373aa                                           |          |
| 2572231994 | t3m_00350 | GC             |         |                                                 | 0.66     |
| 2572231994 | t3m_00350 | Transmembrane  |         | Yes                                             |          |
|            |           |                |         |                                                 |          |
| 2572231995 | t3m_00351 | pfam07790      | DUF1628 |                                                 | 4.20E-07 |
| 2572231995 | t3m_00351 | Locus_type     |         | CDS                                             |          |
| 2572231995 | t3m_00351 | Product_name   |         | Protein of unknown function (DUF1628)           |          |
| 2572231995 | t3m_00351 | Scaffold       |         | t3m_contig_70_42_len_55050_read_count_4293452.5 |          |
| 2572231995 | t3m_00351 | Coordinates    |         | 30819..33374(-)                                 |          |
| 2572231995 | t3m_00351 | DNA_length     |         | 2556bp                                          |          |
| 2572231995 | t3m_00351 | Protein_length |         | 851aa                                           |          |
| 2572231995 | t3m_00351 | GC             |         |                                                 | 0.66     |
| 2572231995 | t3m_00351 | Transmembrane  |         | Yes                                             |          |
|            |           |                |         |                                                 |          |
| 2572231996 | t3m_00352 | Locus_type     |         | CDS                                             |          |
| 2572231996 | t3m_00352 | Product_name   |         | hypothetical protein                            |          |
| 2572231996 | t3m_00352 | Scaffold       |         | t3m_contig_70_42_len_55050_read_count_4293452.5 |          |
| 2572231996 | t3m_00352 | Coordinates    |         | 33659..34225(-)                                 |          |
| 2572231996 | t3m_00352 | DNA_length     |         | 567bp                                           |          |
| 2572231996 | t3m_00352 | Protein_length |         | 188aa                                           |          |
| 2572231996 | t3m_00352 | GC             |         |                                                 | 0.62     |
| 2572231996 | t3m_00352 | Transmembrane  |         | Yes                                             |          |
|            |           |                |         |                                                 |          |
| 2572231997 | t3m_00353 | Locus_type     |         | CDS                                             |          |
| 2572231997 | t3m_00353 | Product_name   |         | hypothetical protein                            |          |
| 2572231997 | t3m_00353 | Scaffold       |         | t3m_contig_70_42_len_55050_read_count_4293452.5 |          |
| 2572231997 | t3m_00353 | Coordinates    |         | 34209..34370(+)                                 |          |
| 2572231997 | t3m_00353 | DNA_length     |         | 162bp                                           |          |
| 2572231997 | t3m_00353 | Protein_length |         | 53aa                                            |          |

|            |           |                |                                                 |          |
|------------|-----------|----------------|-------------------------------------------------|----------|
| 2572231997 | t3m_00353 | GC             |                                                 | 0.56     |
| 2572231998 | t3m_00354 | Locus_type     | CDS                                             |          |
| 2572231998 | t3m_00354 | Product_name   | hypothetical protein                            |          |
| 2572231998 | t3m_00354 | Scaffold       | t3m_contig_70_42_len_55050_read_count_4293452.5 |          |
| 2572231998 | t3m_00354 | Coordinates    | 34753..35250(+)                                 |          |
| 2572231998 | t3m_00354 | DNA_length     | 498bp                                           |          |
| 2572231998 | t3m_00354 | Protein_length | 165aa                                           |          |
| 2572231998 | t3m_00354 | GC             |                                                 | 0.69     |
| 2572231999 | t3m_00355 | pfam00091      | Tubulin                                         | 4.00E-08 |
| 2572231999 | t3m_00355 | Locus_type     | CDS                                             |          |
| 2572231999 | t3m_00355 | Product_name   | Tubulin/FtsZ family, GTPase domain              |          |
| 2572231999 | t3m_00355 | Scaffold       | t3m_contig_70_42_len_55050_read_count_4293452.5 |          |
| 2572231999 | t3m_00355 | Coordinates    | 35291..36211(+)                                 |          |
| 2572231999 | t3m_00355 | DNA_length     | 921bp                                           |          |
| 2572231999 | t3m_00355 | Protein_length | 306aa                                           |          |
| 2572231999 | t3m_00355 | GC             |                                                 | 0.7      |
| 2572232000 | t3m_00356 | Locus_type     | CDS                                             |          |
| 2572232000 | t3m_00356 | Product_name   | hypothetical protein                            |          |
| 2572232000 | t3m_00356 | Scaffold       | t3m_contig_70_42_len_55050_read_count_4293452.5 |          |
| 2572232000 | t3m_00356 | Coordinates    | 36307..36474(+)                                 |          |
| 2572232000 | t3m_00356 | DNA_length     | 168bp                                           |          |
| 2572232000 | t3m_00356 | Protein_length | 55aa                                            |          |
| 2572232000 | t3m_00356 | GC             |                                                 | 0.61     |
| 2572232000 | t3m_00356 | Transmembrane  | Yes                                             |          |
| 2572232001 | t3m_00357 | COG_category   | [R] General function prediction only            |          |
| 2572232001 | t3m_00357 | COG1938        | Archaeal enzymes of ATP-grasp superfamily       | 3.00E-28 |
| 2572232001 | t3m_00357 | pfam09754      | PAC2                                            | 2.80E-23 |
| 2572232001 | t3m_00357 | KO:K06869      | uncharacterized protein                         | 2.30E-22 |
| 2572232001 | t3m_00357 | Locus_type     | CDS                                             |          |
| 2572232001 | t3m_00357 | Product_name   | Archaeal enzymes of ATP-grasp superfamily       |          |

|            |           |                |                                                         |           |
|------------|-----------|----------------|---------------------------------------------------------|-----------|
| 2572232001 | t3m_00357 | Scaffold       | t3m_contig_70_42_len_55050_read_count_4293452.5         |           |
| 2572232001 | t3m_00357 | Coordinates    | 36503..37303(-)                                         |           |
| 2572232001 | t3m_00357 | DNA_length     | 801bp                                                   |           |
| 2572232001 | t3m_00357 | Protein_length | 266aa                                                   |           |
| 2572232001 | t3m_00357 | GC             |                                                         | 0.7       |
| 2572232002 | t3m_00358 | Metacyc        | P303-PWY: ammonia oxidation II (anaerobic)              |           |
| 2572232002 | t3m_00358 | IMG_pathway    | 437: Archaeal replication elongation                    |           |
| 2572232002 | t3m_00358 | COG_category   | [L] Replication, recombination and repair               |           |
| 2572232002 | t3m_00358 | COG0258        | 5'-3' exonuclease (including N-terminal domain of PolI) | 4.00E-31  |
| 2572232002 | t3m_00358 | pfam00867      | XPG_I                                                   | 3.40E-20  |
| 2572232002 | t3m_00358 | pfam00752      | XPG_N                                                   | 3.00E-17  |
| 2572232002 | t3m_00358 | EC:3.-         | Hydrolases.                                             |           |
| 2572232002 | t3m_00358 | KO:K04799      | flap endonuclease-1 [EC:3.-.-.]                         | 0.00E+00  |
| 2572232002 | t3m_00358 | ITERM:00111    | flap endonuclease 1 (EC 3.1.-.-)                        |           |
| 2572232002 | t3m_00358 | Locus_type     | CDS                                                     |           |
| 2572232002 | t3m_00358 | Product_name   | flap endonuclease 1 (EC 3.1.-.-)                        |           |
| 2572232002 | t3m_00358 | Scaffold       | t3m_contig_70_42_len_55050_read_count_4293452.5         |           |
| 2572232002 | t3m_00358 | Coordinates    | 37403..38440(+)                                         |           |
| 2572232002 | t3m_00358 | DNA_length     | 1038bp                                                  |           |
| 2572232002 | t3m_00358 | Protein_length | 345aa                                                   |           |
| 2572232002 | t3m_00358 | GC             |                                                         | 0.69      |
| 2572232003 | t3m_00359 | Metacyc        | P164-PWY: purine nucleobases degradation I (anaerobic)  |           |
| 2572232003 | t3m_00359 | Metacyc        | PWY-5497: purine nucleobases degradation II (anaerobic) |           |
| 2572232003 | t3m_00359 | Metacyc        | PWY-5030: histidine degradation III                     |           |
| 2572232003 | t3m_00359 | COG_category   | [E] Amino acid transport and metabolism                 |           |
| 2572232003 | t3m_00359 | COG3643        | Glutamate formiminotransferase                          | 2.00E-101 |
| 2572232003 | t3m_00359 | pfam02971      | FTCD                                                    | 1.20E-26  |
| 2572232003 | t3m_00359 | pfam07837      | FTCD_N                                                  | 2.00E-67  |
| 2572232003 | t3m_00359 | pfam04961      | FTCD_C                                                  | 5.00E-35  |
| 2572232003 | t3m_00359 | EC:4.3.1.4     | Formimidoyltetrahydrofolate cyclodeaminase.             |           |
| 2572232003 | t3m_00359 | EC:2.1.2.5     | Glutamate formimidoyltransferase.                       |           |
| 2572232003 | t3m_00359 | TIGR02024      | glutamate formiminotransferase                          | 1.60E-117 |

|            |           |                |                                                                         |          |
|------------|-----------|----------------|-------------------------------------------------------------------------|----------|
| 2572232003 | t3m_00359 | KO:K13990      | glutamate formiminotransferase / formiminotetrahydrofolate cyclodea     | 0.00E+00 |
| 2572232003 | t3m_00359 | Locus_type     | CDS                                                                     |          |
| 2572232003 | t3m_00359 | Product_name   | glutamate formiminotransferase                                          |          |
| 2572232003 | t3m_00359 | Scaffold       | t3m_contig_70_42_len_55050_read_count_4293452.5                         |          |
| 2572232003 | t3m_00359 | Coordinates    | 38437..39912(+)                                                         |          |
| 2572232003 | t3m_00359 | DNA_length     | 1476bp                                                                  |          |
| 2572232003 | t3m_00359 | Protein_length | 491aa                                                                   |          |
| 2572232003 | t3m_00359 | GC             |                                                                         | 0.7      |
| 2572232003 | t3m_00359 | Fused_gene     | Yes                                                                     |          |
|            |           |                |                                                                         |          |
| 2572232004 | t3m_00360 | Metacyc        | PWY-6168: flavin biosynthesis III (fungi)                               |          |
| 2572232004 | t3m_00360 | Metacyc        | PWY-6167: flavin biosynthesis II (archaea)                              |          |
| 2572232004 | t3m_00360 | COG_category   | [H] Coenzyme transport and metabolism                                   |          |
| 2572232004 | t3m_00360 | COG1985        | Pyrimidine reductase, riboflavin biosynthesis                           | 9.00E-47 |
| 2572232004 | t3m_00360 | pfam01872      | RibD_C                                                                  | 1.80E-50 |
| 2572232004 | t3m_00360 | EC:1.1.1.302   | 2,5-diamino-6-(ribosylamino)-4(3H)-pyrimidinone 5'-phosphate reductase. |          |
| 2572232004 | t3m_00360 | TIGR00227      | riboflavin-specific deaminase C-terminal domain                         | 3.10E-59 |
| 2572232004 | t3m_00360 | TIGR01508      | 2,5-diamino-6-hydroxy-4-(5-phosphoribosylamino)pyrimidine 1'-reduct.    | 3.60E-57 |
| 2572232004 | t3m_00360 | KO:K14654      | 2,5-diamino-6-(ribosylamino)-4(3H)-pyrimidinone 5'-phosphate reducta    | 2.40E-39 |
| 2572232004 | t3m_00360 | Locus_type     | CDS                                                                     |          |
| 2572232004 | t3m_00360 | Product_name   | riboflavin-specific deaminase C-terminal domain                         |          |
| 2572232004 | t3m_00360 | Scaffold       | t3m_contig_70_42_len_55050_read_count_4293452.5                         |          |
| 2572232004 | t3m_00360 | Coordinates    | 39924..40631(+)                                                         |          |
| 2572232004 | t3m_00360 | DNA_length     | 708bp                                                                   |          |
| 2572232004 | t3m_00360 | Protein_length | 235aa                                                                   |          |
| 2572232004 | t3m_00360 | GC             |                                                                         | 0.69     |
|            |           |                |                                                                         |          |
| 2572232005 | t3m_00361 | Locus_type     | CDS                                                                     |          |
| 2572232005 | t3m_00361 | Product_name   | hypothetical protein                                                    |          |
| 2572232005 | t3m_00361 | Scaffold       | t3m_contig_70_42_len_55050_read_count_4293452.5                         |          |
| 2572232005 | t3m_00361 | Coordinates    | 40708..41097(+)                                                         |          |
| 2572232005 | t3m_00361 | DNA_length     | 390bp                                                                   |          |
| 2572232005 | t3m_00361 | Protein_length | 129aa                                                                   |          |
| 2572232005 | t3m_00361 | GC             |                                                                         | 0.62     |



|            |           |                |                                                                                    |          |
|------------|-----------|----------------|------------------------------------------------------------------------------------|----------|
| 2572232005 | t3m_00361 | Transmembrane  | Yes                                                                                |          |
| 2572232006 | t3m_00362 | COG_category   | [Q] Secondary metabolites biosynthesis, transport and catabolism                   |          |
| 2572232006 | t3m_00362 | COG0179        | 2-keto-4-pentenoate hydratase/2-oxohepta-3-ene-1,7-dioic acid hydrat               | 6.00E-54 |
| 2572232006 | t3m_00362 | pfam01557      | FAA_hydrolase                                                                      | 1.90E-50 |
| 2572232006 | t3m_00362 | Locus_type     | CDS                                                                                |          |
| 2572232006 | t3m_00362 | Product_name   | 2-keto-4-pentenoate hydratase/2-oxohepta-3-ene-1,7-dioic acid hydrat               |          |
| 2572232006 | t3m_00362 | Scaffold       | t3m_contig_70_42_len_55050_read_count_4293452.5                                    |          |
| 2572232006 | t3m_00362 | Coordinates    | 41200..42177(+)                                                                    |          |
| 2572232006 | t3m_00362 | DNA_length     | 978bp                                                                              |          |
| 2572232006 | t3m_00362 | Protein_length | 325aa                                                                              |          |
| 2572232006 | t3m_00362 | GC             |                                                                                    | 0.66     |
| 2572232007 | t3m_00363 | Metacyc        | PWY-6679: jadomycin biosynthesis                                                   |          |
| 2572232007 | t3m_00363 | Metacyc        | PWY-6998: CDP-D-arabitol biosynthesis                                              |          |
| 2572232007 | t3m_00363 | Metacyc        | PWY-7127: CDP-D-mannitol biosynthesis                                              |          |
| 2572232007 | t3m_00363 | Metacyc        | PWY-6749: CMP-legionaminate biosynthesis I                                         |          |
| 2572232007 | t3m_00363 | Metacyc        | PWY-6626: CDP-2-glycerol biosynthesis                                              |          |
| 2572232007 | t3m_00363 | Metacyc        | PWY4FS-4: phosphatidylcholine biosynthesis IV                                      |          |
| 2572232007 | t3m_00363 | COG_category   | [L] Replication, recombination and repair                                          |          |
| 2572232007 | t3m_00363 | COG1467        | Eukaryotic-type DNA primase, catalytic (small) subunit                             | 2.00E-43 |
| 2572232007 | t3m_00363 | pfam01896      | DNA_primase_S                                                                      | 1.90E-17 |
| 2572232007 | t3m_00363 | EC:2.7.7.-     | Transferases. Transferring phosphorous-containing groups. Nucleotidyltransferases. |          |
| 2572232007 | t3m_00363 | TIGR00335      | DNA primase, eukaryotic-type, small subunit, putative                              | 4.80E-42 |
| 2572232007 | t3m_00363 | KO:K02683      | DNA primase [EC:2.7.7.-]                                                           | 0.00E+00 |
| 2572232007 | t3m_00363 | ITERM:00098    | DNA primase small subunit (EC 2.7.7.-)                                             |          |
| 2572232007 | t3m_00363 | Locus_type     | CDS                                                                                |          |
| 2572232007 | t3m_00363 | Product_name   | DNA primase small subunit (EC 2.7.7.-)                                             |          |
| 2572232007 | t3m_00363 | Scaffold       | t3m_contig_70_42_len_55050_read_count_4293452.5                                    |          |
| 2572232007 | t3m_00363 | Coordinates    | 42140..43405(-)                                                                    |          |
| 2572232007 | t3m_00363 | DNA_length     | 1266bp                                                                             |          |
| 2572232007 | t3m_00363 | Protein_length | 421aa                                                                              |          |
| 2572232007 | t3m_00363 | GC             |                                                                                    | 0.69     |

|            |           |                |                                                                |          |
|------------|-----------|----------------|----------------------------------------------------------------|----------|
| 2572232008 | t3m_00364 | COG_category   | [R] General function prediction only                           |          |
| 2572232008 | t3m_00364 | COG1094        | Predicted RNA-binding protein (contains KH domains)            | 3.00E-41 |
| 2572232008 | t3m_00364 | pfam00013      | KH_1                                                           | 7.90E-05 |
| 2572232008 | t3m_00364 | pfam00013      | KH_1                                                           | 8.20E-08 |
| 2572232008 | t3m_00364 | TIGR03665      | arCOG04150 universal archaeal KH domain protein                | 6.70E-58 |
| 2572232008 | t3m_00364 | KO:K06961      | ribosomal RNA assembly protein                                 | 1.60E-41 |
| 2572232008 | t3m_00364 | Locus_type     | CDS                                                            |          |
| 2572232008 | t3m_00364 | Product_name   | arCOG04150 universal archaeal KH domain protein                |          |
| 2572232008 | t3m_00364 | Scaffold       | t3m_contig_70_42_len_55050_read_count_4293452.5                |          |
| 2572232008 | t3m_00364 | Coordinates    | 43410..43982(-)                                                |          |
| 2572232008 | t3m_00364 | DNA_length     | 573bp                                                          |          |
| 2572232008 | t3m_00364 | Protein_length | 190aa                                                          |          |
| 2572232008 | t3m_00364 | GC             |                                                                | 0.71     |
|            |           |                |                                                                |          |
| 2572232009 | t3m_00365 | COG_category   | [T] Signal transduction mechanisms                             |          |
| 2572232009 | t3m_00365 | COG_category   | [D] Cell cycle control, cell division, chromosome partitioning |          |
| 2572232009 | t3m_00365 | COG1718        | Serine/threonine protein kinase involved in cell cycle control | 1.00E-59 |
| 2572232009 | t3m_00365 | pfam01163      | RIO1                                                           | 7.20E-49 |
| 2572232009 | t3m_00365 | EC:2.7.11.1    | Non-specific serine/threonine protein kinase.                  |          |
| 2572232009 | t3m_00365 | KO:K07178      | RIO kinase 1 [EC:2.7.11.1]                                     | 8.80E-43 |
| 2572232009 | t3m_00365 | Locus_type     | CDS                                                            |          |
| 2572232009 | t3m_00365 | Product_name   | Serine/threonine protein kinase involved in cell cycle control |          |
| 2572232009 | t3m_00365 | Scaffold       | t3m_contig_70_42_len_55050_read_count_4293452.5                |          |
| 2572232009 | t3m_00365 | Coordinates    | 43989..44780(-)                                                |          |
| 2572232009 | t3m_00365 | DNA_length     | 792bp                                                          |          |
| 2572232009 | t3m_00365 | Protein_length | 263aa                                                          |          |
| 2572232009 | t3m_00365 | GC             |                                                                | 0.68     |
|            |           |                |                                                                |          |
| 2572232010 | t3m_00366 | Locus_type     | CDS                                                            |          |
| 2572232010 | t3m_00366 | Product_name   | hypothetical protein                                           |          |
| 2572232010 | t3m_00366 | Scaffold       | t3m_contig_70_42_len_55050_read_count_4293452.5                |          |
| 2572232010 | t3m_00366 | Coordinates    | 44922..45488(+)                                                |          |
| 2572232010 | t3m_00366 | DNA_length     | 567bp                                                          |          |
| 2572232010 | t3m_00366 | Protein_length | 188aa                                                          |          |

|            |           |                |                                                                      |          |
|------------|-----------|----------------|----------------------------------------------------------------------|----------|
| 2572232010 | t3m_00366 | GC             |                                                                      | 0.69     |
| 2572232011 | t3m_00367 | COG_category   | [U] Intracellular trafficking, secretion, and vesicular transport    |          |
| 2572232011 | t3m_00367 | COG_category   | [O] Posttranslational modification, protein turnover, chaperones     |          |
| 2572232011 | t3m_00367 | COG1585        | Membrane protein implicated in regulation of membrane protease acti  | 7.00E-09 |
| 2572232011 | t3m_00367 | pfam01957      | NfeD                                                                 | 5.10E-20 |
| 2572232011 | t3m_00367 | Locus_type     | CDS                                                                  |          |
| 2572232011 | t3m_00367 | Product_name   | Membrane protein implicated in regulation of membrane protease activ |          |
| 2572232011 | t3m_00367 | Scaffold       | t3m_contig_70_42_len_55050_read_count_4293452.5                      |          |
| 2572232011 | t3m_00367 | Coordinates    | 45543..46013(+)                                                      |          |
| 2572232011 | t3m_00367 | DNA_length     | 471bp                                                                |          |
| 2572232011 | t3m_00367 | Protein_length | 156aa                                                                |          |
| 2572232011 | t3m_00367 | GC             |                                                                      | 0.65     |
| 2572232011 | t3m_00367 | Transmembrane  | Yes                                                                  |          |
| 2572232012 | t3m_00368 | COG_category   | [O] Posttranslational modification, protein turnover, chaperones     |          |
| 2572232012 | t3m_00368 | COG0330        | Membrane protease subunits, stomatin/prohibitin homologs             | 3.00E-40 |
| 2572232012 | t3m_00368 | pfam01145      | Band_7                                                               | 3.10E-33 |
| 2572232012 | t3m_00368 | Locus_type     | CDS                                                                  |          |
| 2572232012 | t3m_00368 | Product_name   | Membrane protease subunits, stomatin/prohibitin homologs             |          |
| 2572232012 | t3m_00368 | Scaffold       | t3m_contig_70_42_len_55050_read_count_4293452.5                      |          |
| 2572232012 | t3m_00368 | Coordinates    | 46107..47360(+)                                                      |          |
| 2572232012 | t3m_00368 | DNA_length     | 1254bp                                                               |          |
| 2572232012 | t3m_00368 | Protein_length | 417aa                                                                |          |
| 2572232012 | t3m_00368 | GC             |                                                                      | 0.66     |
| 2572232012 | t3m_00368 | Transmembrane  | Yes                                                                  |          |
| 2572232013 | t3m_00369 | Metacyc        | PWY0-321: phenylacetate degradation I (aerobic)                      |          |
| 2572232013 | t3m_00369 | IMG_pathway    | 1014: Dicarboxylate/4-hydroxybutyrate cycle                          |          |
| 2572232013 | t3m_00369 | IMG_pathway    | 222: L-isoleucine degradation to propionyl-CoA and acetyl-CoA        |          |
| 2572232013 | t3m_00369 | IMG_pathway    | 227: L-valine degradation to propionyl-CoA                           |          |
| 2572232013 | t3m_00369 | IMG_pathway    | 369: Pyruvate conversion to butyrate                                 |          |
| 2572232013 | t3m_00369 | IMG_pathway    | 389: Crotonyl-CoA conversion to acetate                              |          |
| 2572232013 | t3m_00369 | IMG_pathway    | 596: 3-hydroxypropionate/4-hydroxybutyrate cycle                     |          |

|            |           |                |                                                                       |          |
|------------|-----------|----------------|-----------------------------------------------------------------------|----------|
| 2572232013 | t3m_00369 | IMG_pathway    | 962: Glyoxylate from acetyl-CoA via ethylmalonyl-CoA pathway          |          |
| 2572232013 | t3m_00369 | COG_category   | [I] Lipid transport and metabolism                                    |          |
| 2572232013 | t3m_00369 | COG1024        | Enoyl-CoA hydratase/carnithine racemase                               | 2.00E-44 |
| 2572232013 | t3m_00369 | pfam00378      | ECH                                                                   | 7.40E-53 |
| 2572232013 | t3m_00369 | EC:5.3.3.18    | 2-(1,2-epoxy-1,2-dihydrophenyl)acetyl-CoA isomerase.                  |          |
| 2572232013 | t3m_00369 | KO:K15866      | 2-(1,2-epoxy-1,2-dihydrophenyl)acetyl-CoA isomerase [EC:5.3.3.18]     | 0.00E+00 |
| 2572232013 | t3m_00369 | ITERM:00575    | short chain enoyl-CoA hydratase (EC 4.2.1.17)                         |          |
| 2572232013 | t3m_00369 | ITERM:00611    | Enoyl-CoA hydratase (EC 4.2.1.17)                                     |          |
| 2572232013 | t3m_00369 | Locus_type     | CDS                                                                   |          |
| 2572232013 | t3m_00369 | Product_name   | short chain enoyl-CoA hydratase (EC 4.2.1.17)/Enoyl-CoA hydratase (EC |          |
| 2572232013 | t3m_00369 | Scaffold       | t3m_contig_70_42_len_55050_read_count_4293452.5                       |          |
| 2572232013 | t3m_00369 | Coordinates    | 47487..48275(+)                                                       |          |
| 2572232013 | t3m_00369 | DNA_length     | 789bp                                                                 |          |
| 2572232013 | t3m_00369 | Protein_length | 262aa                                                                 |          |
| 2572232013 | t3m_00369 | GC             |                                                                       | 0.73     |
| 2572232014 | t3m_00370 | COG_category   | [J] Translation, ribosomal structure and biogenesis                   |          |
| 2572232014 | t3m_00370 | COG1670        | Acetyltransferases, including N-acetylases of ribosomal proteins      | 2.00E-21 |
| 2572232014 | t3m_00370 | pfam13302      | Acetyltransf_3                                                        | 1.60E-21 |
| 2572232014 | t3m_00370 | Locus_type     | CDS                                                                   |          |
| 2572232014 | t3m_00370 | Product_name   | Acetyltransferases, including N-acetylases of ribosomal proteins      |          |
| 2572232014 | t3m_00370 | Scaffold       | t3m_contig_70_42_len_55050_read_count_4293452.5                       |          |
| 2572232014 | t3m_00370 | Coordinates    | 48283..48975(-)                                                       |          |
| 2572232014 | t3m_00370 | DNA_length     | 693bp                                                                 |          |
| 2572232014 | t3m_00370 | Protein_length | 230aa                                                                 |          |
| 2572232014 | t3m_00370 | GC             |                                                                       | 0.69     |
| 2572232015 | t3m_00371 | COG_category   | [J] Translation, ribosomal structure and biogenesis                   |          |
| 2572232015 | t3m_00371 | COG1670        | Acetyltransferases, including N-acetylases of ribosomal proteins      | 2.00E-18 |
| 2572232015 | t3m_00371 | pfam13302      | Acetyltransf_3                                                        | 4.50E-18 |
| 2572232015 | t3m_00371 | Locus_type     | CDS                                                                   |          |
| 2572232015 | t3m_00371 | Product_name   | Acetyltransferases, including N-acetylases of ribosomal proteins      |          |
| 2572232015 | t3m_00371 | Scaffold       | t3m_contig_70_42_len_55050_read_count_4293452.5                       |          |
| 2572232015 | t3m_00371 | Coordinates    | 48906..49568(-)                                                       |          |

|            |           |                |                                                                        |          |
|------------|-----------|----------------|------------------------------------------------------------------------|----------|
| 2572232015 | t3m_00371 | DNA_length     | 663bp                                                                  |          |
| 2572232015 | t3m_00371 | Protein_length | 220aa                                                                  |          |
| 2572232015 | t3m_00371 | GC             |                                                                        | 0.7      |
| 2572232016 | t3m_00372 | KEGG_module    | M00145: NAD(P)H:quinone oxidoreductase, chloroplasts and cyanobacteria |          |
| 2572232016 | t3m_00372 | Metacyc        | PWY-5083: NAD/NADH phosphorylation and dephosphorylation               |          |
| 2572232016 | t3m_00372 | Metacyc        | PWY-4302: aerobic respiration (alternative oxidase pathway)            |          |
| 2572232016 | t3m_00372 | Metacyc        | PWY-3781: aerobic respiration (cytochrome c)                           |          |
| 2572232016 | t3m_00372 | Metacyc        | PWY0-1335: NADH to cytochrome <i>bo</i> oxidase electron transfer      |          |
| 2572232016 | t3m_00372 | Metacyc        | PWY-6692: Fe(II) oxidation                                             |          |
| 2572232016 | t3m_00372 | Metacyc        | PWY0-1334: NADH to cytochrome <i>bd</i> oxidase electron transfer      |          |
| 2572232016 | t3m_00372 | COG_category   | [C] Energy production and conversion                                   |          |
| 2572232016 | t3m_00372 | COG0838        | NADH:ubiquinone oxidoreductase subunit 3 (chain A)                     | 1.00E-11 |
| 2572232016 | t3m_00372 | pfam00507      | Oxidored_q4                                                            | 9.10E-13 |
| 2572232016 | t3m_00372 | EC:1.6.5.3     | NADH:ubiquinone reductase (H(+)-translocating).                        |          |
| 2572232016 | t3m_00372 | KO:K05574      | NAD(P)H-quinone oxidoreductase subunit 3 [EC:1.6.5.3]                  | 9.80E-12 |
| 2572232016 | t3m_00372 | Locus_type     | CDS                                                                    |          |
| 2572232016 | t3m_00372 | Product_name   | NADH:ubiquinone oxidoreductase subunit 3 (chain A)                     |          |
| 2572232016 | t3m_00372 | Scaffold       | t3m_contig_70_42_len_55050_read_count_4293452.5                        |          |
| 2572232016 | t3m_00372 | Coordinates    | 49728..50093(+)                                                        |          |
| 2572232016 | t3m_00372 | DNA_length     | 366bp                                                                  |          |
| 2572232016 | t3m_00372 | Protein_length | 121aa                                                                  |          |
| 2572232016 | t3m_00372 | GC             |                                                                        | 0.65     |
| 2572232016 | t3m_00372 | Transmembrane  | Yes                                                                    |          |
| 2572232017 | t3m_00373 | KEGG_module    | M00144: NADH:quinone oxidoreductase, prokaryotes                       |          |
| 2572232017 | t3m_00373 | Metacyc        | PWY-4302: aerobic respiration (alternative oxidase pathway)            |          |
| 2572232017 | t3m_00373 | Metacyc        | PWY-3781: aerobic respiration (cytochrome c)                           |          |
| 2572232017 | t3m_00373 | Metacyc        | PWY-6692: Fe(II) oxidation                                             |          |
| 2572232017 | t3m_00373 | Metacyc        | PWY-5083: NAD/NADH phosphorylation and dephosphorylation               |          |
| 2572232017 | t3m_00373 | Metacyc        | PWY0-1334: NADH to cytochrome <i>bd</i> oxidase electron transfer      |          |
| 2572232017 | t3m_00373 | Metacyc        | PWY0-1335: NADH to cytochrome <i>bo</i> oxidase electron transfer      |          |
| 2572232017 | t3m_00373 | COG_category   | [C] Energy production and conversion                                   |          |
| 2572232017 | t3m_00373 | COG0377        | NADH:ubiquinone oxidoreductase 20 kD subunit and related Fe-S oxido    | 1.00E-56 |

|            |           |                |                                                                   |          |
|------------|-----------|----------------|-------------------------------------------------------------------|----------|
| 2572232017 | t3m_00373 | pfam01058      | Oxidored_q6                                                       | 8.70E-23 |
| 2572232017 | t3m_00373 | EC:1.6.5.3     | NADH:ubiquinone reductase (H(+)-translocating).                   |          |
| 2572232017 | t3m_00373 | TIGR01957      | NADH-quinone oxidoreductase, B subunit                            | 1.20E-63 |
| 2572232017 | t3m_00373 | KO:K00331      | NADH-quinone oxidoreductase subunit B [EC:1.6.5.3]                | 2.20E-43 |
| 2572232017 | t3m_00373 | Locus_type     | CDS                                                               |          |
| 2572232017 | t3m_00373 | Product_name   | NADH-quinone oxidoreductase, B subunit                            |          |
| 2572232017 | t3m_00373 | Scaffold       | t3m_contig_70_42_len_55050_read_count_4293452.5                   |          |
| 2572232017 | t3m_00373 | Coordinates    | 50081..50710(+)                                                   |          |
| 2572232017 | t3m_00373 | DNA_length     | 630bp                                                             |          |
| 2572232017 | t3m_00373 | Protein_length | 209aa                                                             |          |
| 2572232017 | t3m_00373 | GC             |                                                                   | 0.68     |
| 2572232018 | t3m_00374 | KEGG_module    | M00144: NADH:quinone oxidoreductase, prokaryotes                  |          |
| 2572232018 | t3m_00374 | Metacyc        | PWY-4302: aerobic respiration (alternative oxidase pathway)       |          |
| 2572232018 | t3m_00374 | Metacyc        | PWY0-1334: NADH to cytochrome <i>bd</i> oxidase electron transfer |          |
| 2572232018 | t3m_00374 | Metacyc        | PWY-6692: Fe(II) oxidation                                        |          |
| 2572232018 | t3m_00374 | Metacyc        | PWY0-1335: NADH to cytochrome <i>bo</i> oxidase electron transfer |          |
| 2572232018 | t3m_00374 | Metacyc        | PWY-3781: aerobic respiration (cytochrome c)                      |          |
| 2572232018 | t3m_00374 | Metacyc        | PWY-5083: NAD/NADH phosphorylation and dephosphorylation          |          |
| 2572232018 | t3m_00374 | pfam00329      | Complex1_30kDa                                                    | 2.50E-27 |
| 2572232018 | t3m_00374 | EC:1.6.5.3     | NADH:ubiquinone reductase (H(+)-translocating).                   |          |
| 2572232018 | t3m_00374 | KO:K00332      | NADH-quinone oxidoreductase subunit C [EC:1.6.5.3]                | 1.30E-17 |
| 2572232018 | t3m_00374 | Locus_type     | CDS                                                               |          |
| 2572232018 | t3m_00374 | Product_name   | Respiratory-chain NADH dehydrogenase, 30 Kd subunit               |          |
| 2572232018 | t3m_00374 | Scaffold       | t3m_contig_70_42_len_55050_read_count_4293452.5                   |          |
| 2572232018 | t3m_00374 | Coordinates    | 50762..51223(+)                                                   |          |
| 2572232018 | t3m_00374 | DNA_length     | 462bp                                                             |          |
| 2572232018 | t3m_00374 | Protein_length | 153aa                                                             |          |
| 2572232018 | t3m_00374 | GC             |                                                                   | 0.67     |
| 2572232019 | t3m_00375 | KEGG_module    | M00144: NADH:quinone oxidoreductase, prokaryotes                  |          |
| 2572232019 | t3m_00375 | Metacyc        | PWY-4302: aerobic respiration (alternative oxidase pathway)       |          |
| 2572232019 | t3m_00375 | Metacyc        | PWY-3781: aerobic respiration (cytochrome c)                      |          |
| 2572232019 | t3m_00375 | Metacyc        | PWY0-1334: NADH to cytochrome <i>bd</i> oxidase electron transfer |          |

|            |           |                |                                                                   |           |
|------------|-----------|----------------|-------------------------------------------------------------------|-----------|
| 2572232019 | t3m_00375 | Metacyc        | PWY-6692: Fe(II) oxidation                                        |           |
| 2572232019 | t3m_00375 | Metacyc        | PWY0-1335: NADH to cytochrome <i>bo</i> oxidase electron transfer |           |
| 2572232019 | t3m_00375 | Metacyc        | PWY-5083: NAD/NADH phosphorylation and dephosphorylation          |           |
| 2572232019 | t3m_00375 | COG_category   | [C] Energy production and conversion                              |           |
| 2572232019 | t3m_00375 | COG0649        | NADH:ubiquinone oxidoreductase 49 kD subunit 7                    | 5.00E-110 |
| 2572232019 | t3m_00375 | pfam00346      | Complex1_49kDa                                                    | 2.20E-68  |
| 2572232019 | t3m_00375 | EC:1.6.5.3     | NADH:ubiquinone reductase (H(+)-translocating).                   |           |
| 2572232019 | t3m_00375 | KO:K00333      | NADH-quinone oxidoreductase subunit D [EC:1.6.5.3]                | 0.00E+00  |
| 2572232019 | t3m_00375 | Locus_type     | CDS                                                               |           |
| 2572232019 | t3m_00375 | Product_name   | NADH:ubiquinone oxidoreductase 49 kD subunit 7                    |           |
| 2572232019 | t3m_00375 | Scaffold       | t3m_contig_70_42_len_55050_read_count_4293452.5                   |           |
| 2572232019 | t3m_00375 | Coordinates    | 51255..52361(+)                                                   |           |
| 2572232019 | t3m_00375 | DNA_length     | 1107bp                                                            |           |
| 2572232019 | t3m_00375 | Protein_length | 368aa                                                             |           |
| 2572232019 | t3m_00375 | GC             |                                                                   | 0.66      |
| 2572232020 | t3m_00376 | KEGG_module    | M00144: NADH:quinone oxidoreductase, prokaryotes                  |           |
| 2572232020 | t3m_00376 | Metacyc        | PWY-6692: Fe(II) oxidation                                        |           |
| 2572232020 | t3m_00376 | Metacyc        | PWY-3781: aerobic respiration (cytochrome c)                      |           |
| 2572232020 | t3m_00376 | Metacyc        | PWY0-1335: NADH to cytochrome <i>bo</i> oxidase electron transfer |           |
| 2572232020 | t3m_00376 | Metacyc        | PWY-5083: NAD/NADH phosphorylation and dephosphorylation          |           |
| 2572232020 | t3m_00376 | Metacyc        | PWY-4302: aerobic respiration (alternative oxidase pathway)       |           |
| 2572232020 | t3m_00376 | Metacyc        | PWY0-1334: NADH to cytochrome <i>bd</i> oxidase electron transfer |           |
| 2572232020 | t3m_00376 | COG_category   | [C] Energy production and conversion                              |           |
| 2572232020 | t3m_00376 | COG1005        | NADH:ubiquinone oxidoreductase subunit 1 (chain H)                | 2.00E-70  |
| 2572232020 | t3m_00376 | pfam00146      | NADHdh                                                            | 5.00E-90  |
| 2572232020 | t3m_00376 | EC:1.6.5.3     | NADH:ubiquinone reductase (H(+)-translocating).                   |           |
| 2572232020 | t3m_00376 | KO:K00337      | NADH-quinone oxidoreductase subunit H [EC:1.6.5.3]                | 0.00E+00  |
| 2572232020 | t3m_00376 | Locus_type     | CDS                                                               |           |
| 2572232020 | t3m_00376 | Product_name   | NADH:ubiquinone oxidoreductase subunit 1 (chain H)                |           |
| 2572232020 | t3m_00376 | Scaffold       | t3m_contig_70_42_len_55050_read_count_4293452.5                   |           |
| 2572232020 | t3m_00376 | Coordinates    | 52374..53498(+)                                                   |           |
| 2572232020 | t3m_00376 | DNA_length     | 1125bp                                                            |           |
| 2572232020 | t3m_00376 | Protein_length | 374aa                                                             |           |

|            |           |                |                                                                   |                                                 |          |
|------------|-----------|----------------|-------------------------------------------------------------------|-------------------------------------------------|----------|
| 2572232020 | t3m_00376 | GC             |                                                                   |                                                 | 0.65     |
| 2572232020 | t3m_00376 | Transmembrane  |                                                                   | Yes                                             |          |
| 2572232021 | t3m_00377 | pfam12838      | Fer4_7                                                            |                                                 | 8.10E-09 |
| 2572232021 | t3m_00377 | pfam00037      | Fer4                                                              |                                                 | 3.80E-06 |
| 2572232021 | t3m_00377 | Locus_type     |                                                                   | CDS                                             |          |
| 2572232021 | t3m_00377 | Product_name   |                                                                   | 4Fe-4S binding domain/4Fe-4S dicluster domain   |          |
| 2572232021 | t3m_00377 | Scaffold       |                                                                   | t3m_contig_70_42_len_55050_read_count_4293452.5 |          |
| 2572232021 | t3m_00377 | Coordinates    |                                                                   | 53519..54298(+)                                 |          |
| 2572232021 | t3m_00377 | DNA_length     |                                                                   | 780bp                                           |          |
| 2572232021 | t3m_00377 | Protein_length |                                                                   | 259aa                                           |          |
| 2572232021 | t3m_00377 | GC             |                                                                   |                                                 | 0.65     |
| 2572232022 | t3m_00378 | KEGG_module    | M00144: NADH:quinone oxidoreductase, prokaryotes                  |                                                 |          |
| 2572232022 | t3m_00378 | Metacyc        | PWY-3781: aerobic respiration (cytochrome c)                      |                                                 |          |
| 2572232022 | t3m_00378 | Metacyc        | PWY-6692: Fe(II) oxidation                                        |                                                 |          |
| 2572232022 | t3m_00378 | Metacyc        | PWY-4302: aerobic respiration (alternative oxidase pathway)       |                                                 |          |
| 2572232022 | t3m_00378 | Metacyc        | PWY-5083: NAD/NADH phosphorylation and dephosphorylation          |                                                 |          |
| 2572232022 | t3m_00378 | Metacyc        | PWY0-1334: NADH to cytochrome <i>bd</i> oxidase electron transfer |                                                 |          |
| 2572232022 | t3m_00378 | Metacyc        | PWY0-1335: NADH to cytochrome <i>bo</i> oxidase electron transfer |                                                 |          |
| 2572232022 | t3m_00378 | COG_category   | [C] Energy production and conversion                              |                                                 |          |
| 2572232022 | t3m_00378 | COG0839        | NADH:ubiquinone oxidoreductase subunit 6 (chain J)                |                                                 | 4.00E-07 |
| 2572232022 | t3m_00378 | pfam00499      | Oxidored_q3                                                       |                                                 | 6.90E-15 |
| 2572232022 | t3m_00378 | EC:1.6.5.3     | NADH:ubiquinone reductase (H <sup>+</sup> )-translocating).       |                                                 |          |
| 2572232022 | t3m_00378 | KO:K00339      | NADH-quinone oxidoreductase subunit J [EC:1.6.5.3]                |                                                 | 8.70E-16 |
| 2572232022 | t3m_00378 | ITERM:05537    | NADH dehydrogenase subunit J (EC 1.6.5.3)                         |                                                 |          |
| 2572232022 | t3m_00378 | Locus_type     |                                                                   | CDS                                             |          |
| 2572232022 | t3m_00378 | Product_name   |                                                                   | NADH dehydrogenase subunit J (EC 1.6.5.3)       |          |
| 2572232022 | t3m_00378 | Scaffold       |                                                                   | t3m_contig_70_42_len_55050_read_count_4293452.5 |          |
| 2572232022 | t3m_00378 | Coordinates    |                                                                   | 54295..54783(+)                                 |          |
| 2572232022 | t3m_00378 | DNA_length     |                                                                   | 489bp                                           |          |
| 2572232022 | t3m_00378 | Protein_length |                                                                   | 162aa                                           |          |
| 2572232022 | t3m_00378 | GC             |                                                                   |                                                 | 0.67     |
| 2572232022 | t3m_00378 | Transmembrane  |                                                                   | Yes                                             |          |



|            |           |                |                                                                   |          |
|------------|-----------|----------------|-------------------------------------------------------------------|----------|
| 2572232023 | t3m_00379 | KEGG_module    | M00144: NADH:quinone oxidoreductase, prokaryotes                  |          |
| 2572232023 | t3m_00379 | Metacyc        | PWY-4302: aerobic respiration (alternative oxidase pathway)       |          |
| 2572232023 | t3m_00379 | Metacyc        | PWY-5083: NAD/NADH phosphorylation and dephosphorylation          |          |
| 2572232023 | t3m_00379 | Metacyc        | PWY0-1334: NADH to cytochrome <i>bd</i> oxidase electron transfer |          |
| 2572232023 | t3m_00379 | Metacyc        | PWY-6692: Fe(II) oxidation                                        |          |
| 2572232023 | t3m_00379 | Metacyc        | PWY-3781: aerobic respiration (cytochrome c)                      |          |
| 2572232023 | t3m_00379 | Metacyc        | PWY0-1335: NADH to cytochrome <i>bo</i> oxidase electron transfer |          |
| 2572232023 | t3m_00379 | COG_category   | [C] Energy production and conversion                              |          |
| 2572232023 | t3m_00379 | COG0713        | NADH:ubiquinone oxidoreductase subunit 11 or 4L (chain K)         | 1.00E-09 |
| 2572232023 | t3m_00379 | pfam00420      | Oxidored_q2                                                       | 6.50E-15 |
| 2572232023 | t3m_00379 | EC:1.6.5.3     | NADH:ubiquinone reductase (H(+)-translocating).                   |          |
| 2572232023 | t3m_00379 | KO:K00340      | NADH-quinone oxidoreductase subunit K [EC:1.6.5.3]                | 3.10E-16 |
| 2572232023 | t3m_00379 | Locus_type     | CDS                                                               |          |
| 2572232023 | t3m_00379 | Product_name   | NADH:ubiquinone oxidoreductase subunit 11 or 4L (chain K)         |          |
| 2572232023 | t3m_00379 | Scaffold       | t3m_contig_70_42_len_55050_read_count_4293452.5                   |          |
| 2572232023 | t3m_00379 | Coordinates    | 54780..55049(+)                                                   |          |
| 2572232023 | t3m_00379 | DNA_length     | 270bp                                                             |          |
| 2572232023 | t3m_00379 | Protein_length | 90aa                                                              |          |
| 2572232023 | t3m_00379 | GC             |                                                                   | 0.67     |
| 2572232023 | t3m_00379 | Transmembrane  | Yes                                                               |          |
| 2572232024 | t3m_00380 | Locus_type     | CDS                                                               |          |
| 2572232024 | t3m_00380 | Product_name   | hypothetical protein                                              |          |
| 2572232024 | t3m_00380 | Scaffold       | t3m_contig_70_43_len_54376_read_count_5056668.6                   |          |
| 2572232024 | t3m_00380 | Coordinates    | 3..206(-)                                                         |          |
| 2572232024 | t3m_00380 | DNA_length     | 204bp                                                             |          |
| 2572232024 | t3m_00380 | Protein_length | 68aa                                                              |          |
| 2572232024 | t3m_00380 | GC             |                                                                   | 0.66     |
| 2572232025 | t3m_00381 | IMG_pathway    | 217: N-3-alkylpurine repair via base excision                     |          |
| 2572232025 | t3m_00381 | COG_category   | [L] Replication, recombination and repair                         |          |
| 2572232025 | t3m_00381 | COG2818        | 3-methyladenine DNA glycosylase                                   | 2.00E-65 |
| 2572232025 | t3m_00381 | pfam03352      | Adenine_glyco                                                     | 1.90E-77 |

|            |           |                |                                                                  |          |
|------------|-----------|----------------|------------------------------------------------------------------|----------|
| 2572232025 | t3m_00381 | EC:3.2.2.20    | DNA-3-methyladenine glycosylase I.                               |          |
| 2572232025 | t3m_00381 | TIGR00624      | DNA-3-methyladenine glycosylase I                                | 5.80E-70 |
| 2572232025 | t3m_00381 | KO:K01246      | DNA-3-methyladenine glycosylase I [EC:3.2.2.20]                  | 0.00E+00 |
| 2572232025 | t3m_00381 | ITERM:00571    | DNA-3-methyladenine glycosylase I (EC 3.2.2.20)                  |          |
| 2572232025 | t3m_00381 | Locus_type     | CDS                                                              |          |
| 2572232025 | t3m_00381 | Product_name   | DNA-3-methyladenine glycosylase I (EC 3.2.2.20)                  |          |
| 2572232025 | t3m_00381 | Scaffold       | t3m_contig_70_43_len_54376_read_count_5056668.6                  |          |
| 2572232025 | t3m_00381 | Coordinates    | 256..888(-)                                                      |          |
| 2572232025 | t3m_00381 | DNA_length     | 633bp                                                            |          |
| 2572232025 | t3m_00381 | Protein_length | 210aa                                                            |          |
| 2572232025 | t3m_00381 | GC             |                                                                  | 0.61     |
| 2572232026 | t3m_00382 | Locus_type     | CDS                                                              |          |
| 2572232026 | t3m_00382 | Product_name   | hypothetical protein                                             |          |
| 2572232026 | t3m_00382 | Scaffold       | t3m_contig_70_43_len_54376_read_count_5056668.6                  |          |
| 2572232026 | t3m_00382 | Coordinates    | 1431..1979(+)                                                    |          |
| 2572232026 | t3m_00382 | DNA_length     | 549bp                                                            |          |
| 2572232026 | t3m_00382 | Protein_length | 182aa                                                            |          |
| 2572232026 | t3m_00382 | GC             |                                                                  | 0.59     |
| 2572232027 | t3m_00383 | COG_category   | [E] Amino acid transport and metabolism                          |          |
| 2572232027 | t3m_00383 | COG_category   | [Q] Secondary metabolites biosynthesis, transport and catabolism |          |
| 2572232027 | t3m_00383 | COG3191        | L-aminopeptidase/D-esterase                                      | 6.00E-35 |
| 2572232027 | t3m_00383 | pfam03576      | Peptidase_S58                                                    | 8.70E-42 |
| 2572232027 | t3m_00383 | Locus_type     | CDS                                                              |          |
| 2572232027 | t3m_00383 | Product_name   | L-aminopeptidase/D-esterase                                      |          |
| 2572232027 | t3m_00383 | Scaffold       | t3m_contig_70_43_len_54376_read_count_5056668.6                  |          |
| 2572232027 | t3m_00383 | Coordinates    | 2236..3222(+)                                                    |          |
| 2572232027 | t3m_00383 | DNA_length     | 987bp                                                            |          |
| 2572232027 | t3m_00383 | Protein_length | 328aa                                                            |          |
| 2572232027 | t3m_00383 | GC             |                                                                  | 0.63     |
| 2572232028 | t3m_00384 | pfam01844      | HNH                                                              | 4.90E-10 |
| 2572232028 | t3m_00384 | Locus_type     | CDS                                                              |          |

|            |           |                |                                                 |      |
|------------|-----------|----------------|-------------------------------------------------|------|
| 2572232028 | t3m_00384 | Product_name   | HNH endonuclease                                |      |
| 2572232028 | t3m_00384 | Scaffold       | t3m_contig_70_43_len_54376_read_count_5056668.6 |      |
| 2572232028 | t3m_00384 | Coordinates    | 4389..4865(+)                                   |      |
| 2572232028 | t3m_00384 | DNA_length     | 477bp                                           |      |
| 2572232028 | t3m_00384 | Protein_length | 158aa                                           |      |
| 2572232028 | t3m_00384 | GC             |                                                 | 0.59 |
|            |           |                |                                                 |      |
| 2572232029 | t3m_00385 | Locus_type     | CDS                                             |      |
| 2572232029 | t3m_00385 | Product_name   | hypothetical protein                            |      |
| 2572232029 | t3m_00385 | Scaffold       | t3m_contig_70_43_len_54376_read_count_5056668.6 |      |
| 2572232029 | t3m_00385 | Coordinates    | 7547..8776(-)                                   |      |
| 2572232029 | t3m_00385 | DNA_length     | 1230bp                                          |      |
| 2572232029 | t3m_00385 | Protein_length | 409aa                                           |      |
| 2572232029 | t3m_00385 | GC             |                                                 | 0.66 |
|            |           |                |                                                 |      |
| 2572232030 | t3m_00386 | Locus_type     | CDS                                             |      |
| 2572232030 | t3m_00386 | Product_name   | hypothetical protein                            |      |
| 2572232030 | t3m_00386 | Scaffold       | t3m_contig_70_43_len_54376_read_count_5056668.6 |      |
| 2572232030 | t3m_00386 | Coordinates    | 10100..10882(+)                                 |      |
| 2572232030 | t3m_00386 | DNA_length     | 783bp                                           |      |
| 2572232030 | t3m_00386 | Protein_length | 260aa                                           |      |
| 2572232030 | t3m_00386 | GC             |                                                 | 0.64 |
|            |           |                |                                                 |      |
| 2572232031 | t3m_00387 | Locus_type     | CDS                                             |      |
| 2572232031 | t3m_00387 | Product_name   | hypothetical protein                            |      |
| 2572232031 | t3m_00387 | Scaffold       | t3m_contig_70_43_len_54376_read_count_5056668.6 |      |
| 2572232031 | t3m_00387 | Coordinates    | 11387..12244(-)                                 |      |
| 2572232031 | t3m_00387 | DNA_length     | 858bp                                           |      |
| 2572232031 | t3m_00387 | Protein_length | 285aa                                           |      |
| 2572232031 | t3m_00387 | GC             |                                                 | 0.59 |
|            |           |                |                                                 |      |
| 2572232032 | t3m_00388 | Locus_type     | CDS                                             |      |
| 2572232032 | t3m_00388 | Product_name   | hypothetical protein                            |      |
| 2572232032 | t3m_00388 | Scaffold       | t3m_contig_70_43_len_54376_read_count_5056668.6 |      |

|            |           |                |                                                 |          |
|------------|-----------|----------------|-------------------------------------------------|----------|
| 2572232032 | t3m_00388 | Coordinates    | 12286..13554(-)                                 |          |
| 2572232032 | t3m_00388 | DNA_length     | 1269bp                                          |          |
| 2572232032 | t3m_00388 | Protein_length | 422aa                                           |          |
| 2572232032 | t3m_00388 | GC             |                                                 | 0.57     |
|            |           |                |                                                 |          |
| 2572232033 | t3m_00389 | Locus_type     | CDS                                             |          |
| 2572232033 | t3m_00389 | Product_name   | hypothetical protein                            |          |
| 2572232033 | t3m_00389 | Scaffold       | t3m_contig_70_43_len_54376_read_count_5056668.6 |          |
| 2572232033 | t3m_00389 | Coordinates    | 15311..15880(+)                                 |          |
| 2572232033 | t3m_00389 | DNA_length     | 570bp                                           |          |
| 2572232033 | t3m_00389 | Protein_length | 189aa                                           |          |
| 2572232033 | t3m_00389 | GC             |                                                 | 0.66     |
|            |           |                |                                                 |          |
| 2572232034 | t3m_00390 | Locus_type     | CDS                                             |          |
| 2572232034 | t3m_00390 | Product_name   | hypothetical protein                            |          |
| 2572232034 | t3m_00390 | Scaffold       | t3m_contig_70_43_len_54376_read_count_5056668.6 |          |
| 2572232034 | t3m_00390 | Coordinates    | 15877..16452(+)                                 |          |
| 2572232034 | t3m_00390 | DNA_length     | 576bp                                           |          |
| 2572232034 | t3m_00390 | Protein_length | 191aa                                           |          |
| 2572232034 | t3m_00390 | GC             |                                                 | 0.63     |
|            |           |                |                                                 |          |
| 2572232035 | t3m_00391 | Locus_type     | CDS                                             |          |
| 2572232035 | t3m_00391 | Product_name   | hypothetical protein                            |          |
| 2572232035 | t3m_00391 | Scaffold       | t3m_contig_70_43_len_54376_read_count_5056668.6 |          |
| 2572232035 | t3m_00391 | Coordinates    | 16913..17425(-)                                 |          |
| 2572232035 | t3m_00391 | DNA_length     | 513bp                                           |          |
| 2572232035 | t3m_00391 | Protein_length | 170aa                                           |          |
| 2572232035 | t3m_00391 | GC             |                                                 | 0.62     |
| 2572232035 | t3m_00391 | Transmembrane  | Yes                                             |          |
|            |           |                |                                                 |          |
| 2572232036 | t3m_00392 | COG_category   | [S] Function unknown                            |          |
| 2572232036 | t3m_00392 | COG2119        | Predicted membrane protein                      | 3.00E-10 |
| 2572232036 | t3m_00392 | pfam01169      | UPF0016                                         | 8.50E-08 |
| 2572232036 | t3m_00392 | pfam01169      | UPF0016                                         | 3.30E-12 |

|            |           |                |        |                                                 |          |
|------------|-----------|----------------|--------|-------------------------------------------------|----------|
| 2572232036 | t3m_00392 | Locus_type     |        | CDS                                             |          |
| 2572232036 | t3m_00392 | Product_name   |        | Predicted membrane protein                      |          |
| 2572232036 | t3m_00392 | Scaffold       |        | t3m_contig_70_43_len_54376_read_count_5056668.6 |          |
| 2572232036 | t3m_00392 | Coordinates    |        | 17591..18217(-)                                 |          |
| 2572232036 | t3m_00392 | DNA_length     |        | 627bp                                           |          |
| 2572232036 | t3m_00392 | Protein_length |        | 208aa                                           |          |
| 2572232036 | t3m_00392 | GC             |        |                                                 | 0.64     |
| 2572232036 | t3m_00392 | Transmembrane  |        | Yes                                             |          |
|            |           |                |        |                                                 |          |
| 2572232037 | t3m_00393 | Locus_type     |        | CDS                                             |          |
| 2572232037 | t3m_00393 | Product_name   |        | hypothetical protein                            |          |
| 2572232037 | t3m_00393 | Scaffold       |        | t3m_contig_70_43_len_54376_read_count_5056668.6 |          |
| 2572232037 | t3m_00393 | Coordinates    |        | 18475..18798(-)                                 |          |
| 2572232037 | t3m_00393 | DNA_length     |        | 324bp                                           |          |
| 2572232037 | t3m_00393 | Protein_length |        | 107aa                                           |          |
| 2572232037 | t3m_00393 | GC             |        |                                                 | 0.61     |
|            |           |                |        |                                                 |          |
| 2572232038 | t3m_00394 | Locus_type     |        | CDS                                             |          |
| 2572232038 | t3m_00394 | Product_name   |        | hypothetical protein                            |          |
| 2572232038 | t3m_00394 | Scaffold       |        | t3m_contig_70_43_len_54376_read_count_5056668.6 |          |
| 2572232038 | t3m_00394 | Coordinates    |        | 18788..19045(-)                                 |          |
| 2572232038 | t3m_00394 | DNA_length     |        | 258bp                                           |          |
| 2572232038 | t3m_00394 | Protein_length |        | 85aa                                            |          |
| 2572232038 | t3m_00394 | GC             |        |                                                 | 0.64     |
|            |           |                |        |                                                 |          |
| 2572232039 | t3m_00395 | pfam01872      | RibD_C |                                                 | 5.70E-18 |
| 2572232039 | t3m_00395 | Locus_type     |        | CDS                                             |          |
| 2572232039 | t3m_00395 | Product_name   |        | RibD C-terminal domain                          |          |
| 2572232039 | t3m_00395 | Scaffold       |        | t3m_contig_70_43_len_54376_read_count_5056668.6 |          |
| 2572232039 | t3m_00395 | Coordinates    |        | 19492..20109(-)                                 |          |
| 2572232039 | t3m_00395 | DNA_length     |        | 618bp                                           |          |
| 2572232039 | t3m_00395 | Protein_length |        | 205aa                                           |          |
| 2572232039 | t3m_00395 | GC             |        |                                                 | 0.6      |

|            |           |                |                                                       |          |
|------------|-----------|----------------|-------------------------------------------------------|----------|
| 2572232040 | t3m_00396 | KEGG_module    | M00254: ABC-2 type transport system                   |          |
| 2572232040 | t3m_00396 | pfam12679      | ABC2_membrane_2                                       | 1.30E-10 |
| 2572232040 | t3m_00396 | KO:K01992      | ABC-2 type transport system permease protein          | 4.50E-33 |
| 2572232040 | t3m_00396 | Locus_type     | CDS                                                   |          |
| 2572232040 | t3m_00396 | Product_name   | ABC-2 family transporter protein                      |          |
| 2572232040 | t3m_00396 | Scaffold       | t3m_contig_70_43_len_54376_read_count_5056668.6       |          |
| 2572232040 | t3m_00396 | Coordinates    | 20351..21088(-)                                       |          |
| 2572232040 | t3m_00396 | DNA_length     | 738bp                                                 |          |
| 2572232040 | t3m_00396 | Protein_length | 245aa                                                 |          |
| 2572232040 | t3m_00396 | GC             |                                                       | 0.61     |
| 2572232040 | t3m_00396 | Transmembrane  | Yes                                                   |          |
| 2572232041 | t3m_00397 | KEGG_module    | M00248: Putative antibiotic transport system          |          |
| 2572232041 | t3m_00397 | COG_category   | [V] Defense mechanisms                                |          |
| 2572232041 | t3m_00397 | COG1131        | ABC-type multidrug transport system, ATPase component | 5.00E-69 |
| 2572232041 | t3m_00397 | pfam00005      | ABC_tran                                              | 5.20E-30 |
| 2572232041 | t3m_00397 | KO:K09687      | antibiotic transport system ATP-binding protein       | 0.00E+00 |
| 2572232041 | t3m_00397 | Locus_type     | CDS                                                   |          |
| 2572232041 | t3m_00397 | Product_name   | ABC-type multidrug transport system, ATPase component |          |
| 2572232041 | t3m_00397 | Scaffold       | t3m_contig_70_43_len_54376_read_count_5056668.6       |          |
| 2572232041 | t3m_00397 | Coordinates    | 21085..22017(-)                                       |          |
| 2572232041 | t3m_00397 | DNA_length     | 933bp                                                 |          |
| 2572232041 | t3m_00397 | Protein_length | 310aa                                                 |          |
| 2572232041 | t3m_00397 | GC             |                                                       | 0.6      |
| 2572232042 | t3m_00398 | pfam07690      | MFS_1                                                 | 2.40E-37 |
| 2572232042 | t3m_00398 | Locus_type     | CDS                                                   |          |
| 2572232042 | t3m_00398 | Product_name   | Major Facilitator Superfamily                         |          |
| 2572232042 | t3m_00398 | Scaffold       | t3m_contig_70_43_len_54376_read_count_5056668.6       |          |
| 2572232042 | t3m_00398 | Coordinates    | 22158..23570(-)                                       |          |
| 2572232042 | t3m_00398 | DNA_length     | 1413bp                                                |          |
| 2572232042 | t3m_00398 | Protein_length | 470aa                                                 |          |
| 2572232042 | t3m_00398 | GC             |                                                       | 0.59     |
| 2572232042 | t3m_00398 | Transmembrane  | Yes                                                   |          |

|            |           |                |                                                         |                                                         |          |
|------------|-----------|----------------|---------------------------------------------------------|---------------------------------------------------------|----------|
| 2572232043 | t3m_00399 | pfam14026      | DUF4242                                                 |                                                         | 1.60E-21 |
| 2572232043 | t3m_00399 | Locus_type     |                                                         | CDS                                                     |          |
| 2572232043 | t3m_00399 | Product_name   |                                                         | Protein of unknown function (DUF4242)                   |          |
| 2572232043 | t3m_00399 | Scaffold       |                                                         | t3m_contig_70_43_len_54376_read_count_5056668.6         |          |
| 2572232043 | t3m_00399 | Coordinates    |                                                         | 24574..24834(-)                                         |          |
| 2572232043 | t3m_00399 | DNA_length     |                                                         | 261bp                                                   |          |
| 2572232043 | t3m_00399 | Protein_length |                                                         | 86aa                                                    |          |
| 2572232043 | t3m_00399 | GC             |                                                         |                                                         | 0.62     |
| 2572232044 | t3m_00400 | Locus_type     |                                                         | CDS                                                     |          |
| 2572232044 | t3m_00400 | Product_name   |                                                         | hypothetical protein                                    |          |
| 2572232044 | t3m_00400 | Scaffold       |                                                         | t3m_contig_70_43_len_54376_read_count_5056668.6         |          |
| 2572232044 | t3m_00400 | Coordinates    |                                                         | 24961..25185(+)                                         |          |
| 2572232044 | t3m_00400 | DNA_length     |                                                         | 225bp                                                   |          |
| 2572232044 | t3m_00400 | Protein_length |                                                         | 74aa                                                    |          |
| 2572232044 | t3m_00400 | GC             |                                                         |                                                         | 0.63     |
| 2572232044 | t3m_00400 | Transmembrane  |                                                         | Yes                                                     |          |
| 2572232045 | t3m_00401 | KEGG_module    | M00248: Putative antibiotic transport system            |                                                         |          |
| 2572232045 | t3m_00401 | COG_category   | [V] Defense mechanisms                                  |                                                         |          |
| 2572232045 | t3m_00401 | COG0842        | ABC-type multidrug transport system, permease component |                                                         | 7.00E-07 |
| 2572232045 | t3m_00401 | pfam01061      | ABC2_membrane                                           |                                                         | 8.90E-21 |
| 2572232045 | t3m_00401 | KO:K09686      | antibiotic transport system permease protein            |                                                         | 0.00E+00 |
| 2572232045 | t3m_00401 | Locus_type     |                                                         | CDS                                                     |          |
| 2572232045 | t3m_00401 | Product_name   |                                                         | ABC-type multidrug transport system, permease component |          |
| 2572232045 | t3m_00401 | Scaffold       |                                                         | t3m_contig_70_43_len_54376_read_count_5056668.6         |          |
| 2572232045 | t3m_00401 | Coordinates    |                                                         | 25422..26222(-)                                         |          |
| 2572232045 | t3m_00401 | DNA_length     |                                                         | 801bp                                                   |          |
| 2572232045 | t3m_00401 | Protein_length |                                                         | 266aa                                                   |          |
| 2572232045 | t3m_00401 | GC             |                                                         |                                                         | 0.63     |
| 2572232045 | t3m_00401 | Transmembrane  |                                                         | Yes                                                     |          |
| 2572232046 | t3m_00402 | KEGG_module    | M00248: Putative antibiotic transport system            |                                                         |          |

|            |           |                |                                                                                |          |
|------------|-----------|----------------|--------------------------------------------------------------------------------|----------|
| 2572232046 | t3m_00402 | COG_category   | [V] Defense mechanisms                                                         |          |
| 2572232046 | t3m_00402 | COG1131        | ABC-type multidrug transport system, ATPase component                          | 5.00E-68 |
| 2572232046 | t3m_00402 | pfam00005      | ABC_tran                                                                       | 9.30E-28 |
| 2572232046 | t3m_00402 | KO:K09687      | antibiotic transport system ATP-binding protein                                | 0.00E+00 |
| 2572232046 | t3m_00402 | Locus_type     | CDS                                                                            |          |
| 2572232046 | t3m_00402 | Product_name   | ABC-type multidrug transport system, ATPase component                          |          |
| 2572232046 | t3m_00402 | Scaffold       | t3m_contig_70_43_len_54376_read_count_5056668.6                                |          |
| 2572232046 | t3m_00402 | Coordinates    | 26219..27193(-)                                                                |          |
| 2572232046 | t3m_00402 | DNA_length     | 975bp                                                                          |          |
| 2572232046 | t3m_00402 | Protein_length | 324aa                                                                          |          |
| 2572232046 | t3m_00402 | GC             |                                                                                | 0.65     |
| 2572232047 | t3m_00403 | pfam02909      | TetR_C                                                                         | 2.80E-16 |
| 2572232047 | t3m_00403 | pfam00440      | TetR_N                                                                         | 1.10E-14 |
| 2572232047 | t3m_00403 | ITERM:02313    | transcriptional regulator, TetR family                                         |          |
| 2572232047 | t3m_00403 | Locus_type     | CDS                                                                            |          |
| 2572232047 | t3m_00403 | Product_name   | transcriptional regulator, TetR family                                         |          |
| 2572232047 | t3m_00403 | Scaffold       | t3m_contig_70_43_len_54376_read_count_5056668.6                                |          |
| 2572232047 | t3m_00403 | Coordinates    | 27321..28010(+)                                                                |          |
| 2572232047 | t3m_00403 | DNA_length     | 690bp                                                                          |          |
| 2572232047 | t3m_00403 | Protein_length | 229aa                                                                          |          |
| 2572232047 | t3m_00403 | GC             |                                                                                | 0.64     |
| 2572232048 | t3m_00404 | KEGG_module    | M00011: Citrate cycle, second carbon oxidation, 2-oxoglutarate => oxaloacetate |          |
| 2572232048 | t3m_00404 | KEGG_module    | M00311: 2-oxoglutarate:ferredoxin oxidoreductase                               |          |
| 2572232048 | t3m_00404 | Metacyc        | P42-PWY: incomplete reductive TCA cycle                                        |          |
| 2572232048 | t3m_00404 | Metacyc        | PWY-6969: TCA cycle V (2-oxoglutarate:ferredoxin oxidoreductase)               |          |
| 2572232048 | t3m_00404 | Metacyc        | P23-PWY: reductive TCA cycle I                                                 |          |
| 2572232048 | t3m_00404 | Metacyc        | PWY-5392: reductive TCA cycle II                                               |          |
| 2572232048 | t3m_00404 | Metacyc        | REDCITCYC: TCA cycle III (helicobacter)                                        |          |
| 2572232048 | t3m_00404 | COG_category   | [C] Energy production and conversion                                           |          |
| 2572232048 | t3m_00404 | COG1014        | Pyruvate:ferredoxin oxidoreductase and related 2-oxoacid:ferredoxin o          | 6.00E-17 |
| 2572232048 | t3m_00404 | pfam01558      | POR                                                                            | 4.30E-29 |
| 2572232048 | t3m_00404 | EC:1.2.7.3     | 2-oxoglutarate synthase.                                                       |          |



|            |           |                |                                                                                |          |
|------------|-----------|----------------|--------------------------------------------------------------------------------|----------|
| 2572232048 | t3m_00404 | KO:K00177      | 2-oxoglutarate ferredoxin oxidoreductase subunit gamma [EC:1.2.7.3]            | 1.30E-32 |
| 2572232048 | t3m_00404 | Locus_type     | CDS                                                                            |          |
| 2572232048 | t3m_00404 | Product_name   | Pyruvate:ferredoxin oxidoreductase and related 2-oxoacid:ferredoxin ox         |          |
| 2572232048 | t3m_00404 | Scaffold       | t3m_contig_70_43_len_54376_read_count_5056668.6                                |          |
| 2572232048 | t3m_00404 | Coordinates    | 28114..28743(-)                                                                |          |
| 2572232048 | t3m_00404 | DNA_length     | 630bp                                                                          |          |
| 2572232048 | t3m_00404 | Protein_length | 209aa                                                                          |          |
| 2572232048 | t3m_00404 | GC             |                                                                                | 0.63     |
| 2572232049 | t3m_00405 | KEGG_module    | M00311: 2-oxoglutarate:ferredoxin oxidoreductase                               |          |
| 2572232049 | t3m_00405 | KEGG_module    | M00011: Citrate cycle, second carbon oxidation, 2-oxoglutarate => oxaloacetate |          |
| 2572232049 | t3m_00405 | Metacyc        | REDCITCYC: TCA cycle III (helicobacter)                                        |          |
| 2572232049 | t3m_00405 | Metacyc        | PWY-6969: TCA cycle V (2-oxoglutarate:ferredoxin oxidoreductase)               |          |
| 2572232049 | t3m_00405 | Metacyc        | P42-PWY: incomplete reductive TCA cycle                                        |          |
| 2572232049 | t3m_00405 | Metacyc        | P23-PWY: reductive TCA cycle I                                                 |          |
| 2572232049 | t3m_00405 | Metacyc        | PWY-5392: reductive TCA cycle II                                               |          |
| 2572232049 | t3m_00405 | COG_category   | [C] Energy production and conversion                                           |          |
| 2572232049 | t3m_00405 | COG1013        | Pyruvate:ferredoxin oxidoreductase and related 2-oxoacid:ferredoxin o          | 9.00E-38 |
| 2572232049 | t3m_00405 | pfam02775      | TPP_enzyme_C                                                                   | 2.10E-22 |
| 2572232049 | t3m_00405 | EC:1.2.7.3     | 2-oxoglutarate synthase.                                                       |          |
| 2572232049 | t3m_00405 | KO:K00175      | 2-oxoglutarate ferredoxin oxidoreductase subunit beta [EC:1.2.7.3]             | 0.00E+00 |
| 2572232049 | t3m_00405 | Locus_type     | CDS                                                                            |          |
| 2572232049 | t3m_00405 | Product_name   | Pyruvate:ferredoxin oxidoreductase and related 2-oxoacid:ferredoxin ox         |          |
| 2572232049 | t3m_00405 | Scaffold       | t3m_contig_70_43_len_54376_read_count_5056668.6                                |          |
| 2572232049 | t3m_00405 | Coordinates    | 28740..29540(-)                                                                |          |
| 2572232049 | t3m_00405 | DNA_length     | 801bp                                                                          |          |
| 2572232049 | t3m_00405 | Protein_length | 266aa                                                                          |          |
| 2572232049 | t3m_00405 | GC             |                                                                                | 0.64     |
| 2572232050 | t3m_00406 | KEGG_module    | M00011: Citrate cycle, second carbon oxidation, 2-oxoglutarate => oxaloacetate |          |
| 2572232050 | t3m_00406 | KEGG_module    | M00311: 2-oxoglutarate:ferredoxin oxidoreductase                               |          |
| 2572232050 | t3m_00406 | KEGG_module    | M00173: Reductive citric acid cycle (Arnon-Buchanan cycle)                     |          |
| 2572232050 | t3m_00406 | Metacyc        | P23-PWY: reductive TCA cycle I                                                 |          |
| 2572232050 | t3m_00406 | Metacyc        | PWY-5392: reductive TCA cycle II                                               |          |

|            |           |                |                                                                                |          |
|------------|-----------|----------------|--------------------------------------------------------------------------------|----------|
| 2572232050 | t3m_00406 | Metacyc        | PWY-6969: TCA cycle V (2-oxoglutarate:ferredoxin oxidoreductase)               |          |
| 2572232050 | t3m_00406 | Metacyc        | REDCITCYC: TCA cycle III (helicobacter)                                        |          |
| 2572232050 | t3m_00406 | Metacyc        | P42-PWY: incomplete reductive TCA cycle                                        |          |
| 2572232050 | t3m_00406 | COG_category   | [C] Energy production and conversion                                           |          |
| 2572232050 | t3m_00406 | COG0674        | Pyruvate:ferredoxin oxidoreductase and related 2-oxoacid:ferredoxin o          | 6.00E-53 |
| 2572232050 | t3m_00406 | pfam01855      | POR_N                                                                          | 1.70E-47 |
| 2572232050 | t3m_00406 | EC:1.2.7.3     | 2-oxoglutarate synthase.                                                       |          |
| 2572232050 | t3m_00406 | KO:K00174      | 2-oxoglutarate ferredoxin oxidoreductase subunit alpha [EC:1.2.7.3]            | 0.00E+00 |
| 2572232050 | t3m_00406 | Locus_type     | CDS                                                                            |          |
| 2572232050 | t3m_00406 | Product_name   | Pyruvate:ferredoxin oxidoreductase and related 2-oxoacid:ferredoxin ox         |          |
| 2572232050 | t3m_00406 | Scaffold       | t3m_contig_70_43_len_54376_read_count_5056668.6                                |          |
| 2572232050 | t3m_00406 | Coordinates    | 29537..30604(-)                                                                |          |
| 2572232050 | t3m_00406 | DNA_length     | 1068bp                                                                         |          |
| 2572232050 | t3m_00406 | Protein_length | 355aa                                                                          |          |
| 2572232050 | t3m_00406 | GC             |                                                                                | 0.65     |
| 2572232051 | t3m_00407 | KEGG_module    | M00011: Citrate cycle, second carbon oxidation, 2-oxoglutarate => oxaloacetate |          |
| 2572232051 | t3m_00407 | KEGG_module    | M00311: 2-oxoglutarate:ferredoxin oxidoreductase                               |          |
| 2572232051 | t3m_00407 | Metacyc        | REDCITCYC: TCA cycle III (helicobacter)                                        |          |
| 2572232051 | t3m_00407 | Metacyc        | PWY-6969: TCA cycle V (2-oxoglutarate:ferredoxin oxidoreductase)               |          |
| 2572232051 | t3m_00407 | Metacyc        | P23-PWY: reductive TCA cycle I                                                 |          |
| 2572232051 | t3m_00407 | Metacyc        | P42-PWY: incomplete reductive TCA cycle                                        |          |
| 2572232051 | t3m_00407 | Metacyc        | PWY-5392: reductive TCA cycle II                                               |          |
| 2572232051 | t3m_00407 | pfam12838      | Fer4_7                                                                         | 1.60E-07 |
| 2572232051 | t3m_00407 | EC:1.2.7.3     | 2-oxoglutarate synthase.                                                       |          |
| 2572232051 | t3m_00407 | KO:K00176      | 2-oxoglutarate ferredoxin oxidoreductase subunit delta [EC:1.2.7.3]            | 1.50E-14 |
| 2572232051 | t3m_00407 | Locus_type     | CDS                                                                            |          |
| 2572232051 | t3m_00407 | Product_name   | 4Fe-4S dicluster domain                                                        |          |
| 2572232051 | t3m_00407 | Scaffold       | t3m_contig_70_43_len_54376_read_count_5056668.6                                |          |
| 2572232051 | t3m_00407 | Coordinates    | 30601..30855(-)                                                                |          |
| 2572232051 | t3m_00407 | DNA_length     | 255bp                                                                          |          |
| 2572232051 | t3m_00407 | Protein_length | 84aa                                                                           |          |
| 2572232051 | t3m_00407 | GC             |                                                                                | 0.62     |

|            |           |                |                                                                  |          |
|------------|-----------|----------------|------------------------------------------------------------------|----------|
| 2572232052 | t3m_00408 | Locus_type     | CDS                                                              |          |
| 2572232052 | t3m_00408 | Product_name   | hypothetical protein                                             |          |
| 2572232052 | t3m_00408 | Scaffold       | t3m_contig_70_43_len_54376_read_count_5056668.6                  |          |
| 2572232052 | t3m_00408 | Coordinates    | 31026..31745(-)                                                  |          |
| 2572232052 | t3m_00408 | DNA_length     | 720bp                                                            |          |
| 2572232052 | t3m_00408 | Protein_length | 239aa                                                            |          |
| 2572232052 | t3m_00408 | GC             |                                                                  | 0.64     |
|            |           |                |                                                                  |          |
| 2572232053 | t3m_00409 | COG_category   | [G] Carbohydrate transport and metabolism                        |          |
| 2572232053 | t3m_00409 | COG2814        | Arabinose efflux permease                                        | 3.00E-04 |
| 2572232053 | t3m_00409 | pfam07690      | MFS_1                                                            | 2.80E-25 |
| 2572232053 | t3m_00409 | Locus_type     | CDS                                                              |          |
| 2572232053 | t3m_00409 | Product_name   | Arabinose efflux permease                                        |          |
| 2572232053 | t3m_00409 | Scaffold       | t3m_contig_70_43_len_54376_read_count_5056668.6                  |          |
| 2572232053 | t3m_00409 | Coordinates    | 32154..33356(-)                                                  |          |
| 2572232053 | t3m_00409 | DNA_length     | 1203bp                                                           |          |
| 2572232053 | t3m_00409 | Protein_length | 400aa                                                            |          |
| 2572232053 | t3m_00409 | GC             |                                                                  | 0.65     |
| 2572232053 | t3m_00409 | Transmembrane  | Yes                                                              |          |
|            |           |                |                                                                  |          |
| 2572232054 | t3m_00410 | COG_category   | [Q] Secondary metabolites biosynthesis, transport and catabolism |          |
| 2572232054 | t3m_00410 | COG1335        | Amidases related to nicotinamidase                               | 2.00E-28 |
| 2572232054 | t3m_00410 | pfam00857      | Isochorismatase                                                  | 1.20E-41 |
| 2572232054 | t3m_00410 | Locus_type     | CDS                                                              |          |
| 2572232054 | t3m_00410 | Product_name   | Amidases related to nicotinamidase                               |          |
| 2572232054 | t3m_00410 | Scaffold       | t3m_contig_70_43_len_54376_read_count_5056668.6                  |          |
| 2572232054 | t3m_00410 | Coordinates    | 33711..34307(+)                                                  |          |
| 2572232054 | t3m_00410 | DNA_length     | 597bp                                                            |          |
| 2572232054 | t3m_00410 | Protein_length | 198aa                                                            |          |
| 2572232054 | t3m_00410 | GC             |                                                                  | 0.64     |
|            |           |                |                                                                  |          |
| 2572232055 | t3m_00411 | pfam01136      | Peptidase_U32                                                    | 8.10E-19 |
| 2572232055 | t3m_00411 | Locus_type     | CDS                                                              |          |
| 2572232055 | t3m_00411 | Product_name   | Peptidase family U32                                             |          |

|            |           |                |                                                                  |          |
|------------|-----------|----------------|------------------------------------------------------------------|----------|
| 2572232055 | t3m_00411 | Scaffold       | t3m_contig_70_43_len_54376_read_count_5056668.6                  |          |
| 2572232055 | t3m_00411 | Coordinates    | 34283..35434(-)                                                  |          |
| 2572232055 | t3m_00411 | DNA_length     | 1152bp                                                           |          |
| 2572232055 | t3m_00411 | Protein_length | 383aa                                                            |          |
| 2572232055 | t3m_00411 | GC             |                                                                  | 0.67     |
| 2572232056 | t3m_00412 | COG_category   | [E] Amino acid transport and metabolism                          |          |
| 2572232056 | t3m_00412 | COG1605        | Chorismate mutase                                                | 4.00E-06 |
| 2572232056 | t3m_00412 | pfam01817      | CM_2                                                             | 2.30E-07 |
| 2572232056 | t3m_00412 | Locus_type     | CDS                                                              |          |
| 2572232056 | t3m_00412 | Product_name   | Chorismate mutase                                                |          |
| 2572232056 | t3m_00412 | Scaffold       | t3m_contig_70_43_len_54376_read_count_5056668.6                  |          |
| 2572232056 | t3m_00412 | Coordinates    | 35524..35934(+)                                                  |          |
| 2572232056 | t3m_00412 | DNA_length     | 411bp                                                            |          |
| 2572232056 | t3m_00412 | Protein_length | 136aa                                                            |          |
| 2572232056 | t3m_00412 | GC             |                                                                  | 0.71     |
| 2572232057 | t3m_00413 | COG_category   | [R] General function prediction only                             |          |
| 2572232057 | t3m_00413 | COG3413        | Predicted DNA binding protein                                    | 3.00E-14 |
| 2572232057 | t3m_00413 | pfam04967      | HTH_10                                                           | 1.20E-17 |
| 2572232057 | t3m_00413 | Locus_type     | CDS                                                              |          |
| 2572232057 | t3m_00413 | Product_name   | Predicted DNA binding protein                                    |          |
| 2572232057 | t3m_00413 | Scaffold       | t3m_contig_70_43_len_54376_read_count_5056668.6                  |          |
| 2572232057 | t3m_00413 | Coordinates    | 35985..36656(-)                                                  |          |
| 2572232057 | t3m_00413 | DNA_length     | 672bp                                                            |          |
| 2572232057 | t3m_00413 | Protein_length | 223aa                                                            |          |
| 2572232057 | t3m_00413 | GC             |                                                                  | 0.71     |
| 2572232058 | t3m_00414 | COG_category   | [O] Posttranslational modification, protein turnover, chaperones |          |
| 2572232058 | t3m_00414 | COG1180        | Pyruvate-formate lyase-activating enzyme                         | 5.00E-68 |
| 2572232058 | t3m_00414 | pfam04055      | Radical_SAM                                                      | 3.00E-17 |
| 2572232058 | t3m_00414 | EC:1.97.1.4    | [Formate-C-acetyltransferase]-activating enzyme.                 |          |
| 2572232058 | t3m_00414 | TIGR04337      | AmmeMemoRadiSam system radical SAM enzyme                        | 1.50E-99 |
| 2572232058 | t3m_00414 | KO:K04069      | pyruvate formate lyase activating enzyme [EC:1.97.1.4]           | 0.00E+00 |

|            |           |                |                                                                 |           |
|------------|-----------|----------------|-----------------------------------------------------------------|-----------|
| 2572232058 | t3m_00414 | Locus_type     | CDS                                                             |           |
| 2572232058 | t3m_00414 | Product_name   | AmmeMemoRadiSam system radical SAM enzyme                       |           |
| 2572232058 | t3m_00414 | Scaffold       | t3m_contig_70_43_len_54376_read_count_5056668.6                 |           |
| 2572232058 | t3m_00414 | Coordinates    | 36887..37954(-)                                                 |           |
| 2572232058 | t3m_00414 | DNA_length     | 1068bp                                                          |           |
| 2572232058 | t3m_00414 | Protein_length | 355aa                                                           |           |
| 2572232058 | t3m_00414 | GC             |                                                                 | 0.66      |
| 2572232059 | t3m_00415 | COG_category   | [J] Translation, ribosomal structure and biogenesis             |           |
| 2572232059 | t3m_00415 | COG1746        | tRNA nucleotidyltransferase (CCA-adding enzyme)                 | 2.00E-88  |
| 2572232059 | t3m_00415 | pfam01909      | NTP_transf_2                                                    | 3.80E-08  |
| 2572232059 | t3m_00415 | pfam09249      | tRNA_NucTransf2                                                 | 1.30E-33  |
| 2572232059 | t3m_00415 | EC:2.7.7.72    | CCA tRNA nucleotidyltransferase.                                |           |
| 2572232059 | t3m_00415 | TIGR03671      | CCA-adding enzyme                                               | 1.60E-117 |
| 2572232059 | t3m_00415 | KO:K07558      | tRNA nucleotidyltransferase (CCA-adding enzyme) [EC:2.7.7.72]   | 0.00E+00  |
| 2572232059 | t3m_00415 | Locus_type     | CDS                                                             |           |
| 2572232059 | t3m_00415 | Product_name   | CCA-adding enzyme                                               |           |
| 2572232059 | t3m_00415 | Scaffold       | t3m_contig_70_43_len_54376_read_count_5056668.6                 |           |
| 2572232059 | t3m_00415 | Coordinates    | 37992..39467(+)                                                 |           |
| 2572232059 | t3m_00415 | DNA_length     | 1476bp                                                          |           |
| 2572232059 | t3m_00415 | Protein_length | 491aa                                                           |           |
| 2572232059 | t3m_00415 | GC             |                                                                 | 0.71      |
| 2572232060 | t3m_00416 | Locus_type     | CDS                                                             |           |
| 2572232060 | t3m_00416 | Product_name   | hypothetical protein                                            |           |
| 2572232060 | t3m_00416 | Scaffold       | t3m_contig_70_43_len_54376_read_count_5056668.6                 |           |
| 2572232060 | t3m_00416 | Coordinates    | 39487..39852(-)                                                 |           |
| 2572232060 | t3m_00416 | DNA_length     | 366bp                                                           |           |
| 2572232060 | t3m_00416 | Protein_length | 121aa                                                           |           |
| 2572232060 | t3m_00416 | GC             |                                                                 | 0.64      |
| 2572232060 | t3m_00416 | Transmembrane  | Yes                                                             |           |
| 2572232061 | t3m_00417 | Metacyc        | PWY-6987: lipoate biosynthesis and incorporation III (Bacillus) |           |
| 2572232061 | t3m_00417 | Metacyc        | PWY0-501: lipoate biosynthesis and incorporation I              |           |

|            |           |                |                                                                                     |           |
|------------|-----------|----------------|-------------------------------------------------------------------------------------|-----------|
| 2572232061 | t3m_00417 | Metacyc        | PWY0-1275: lipoate biosynthesis and incorporation II                                |           |
| 2572232061 | t3m_00417 | COG_category   | [H] Coenzyme transport and metabolism                                               |           |
| 2572232061 | t3m_00417 | COG0320        | Lipoate synthase                                                                    | 7.00E-104 |
| 2572232061 | t3m_00417 | pfam04055      | Radical_SAM                                                                         | 5.30E-12  |
| 2572232061 | t3m_00417 | EC:2.8.1.8     | Lipoyl synthase.                                                                    |           |
| 2572232061 | t3m_00417 | TIGR00510      | lipoate synthase                                                                    | 1.40E-108 |
| 2572232061 | t3m_00417 | KO:K03644      | lipoic acid synthetase [EC:2.8.1.8]                                                 | 0.00E+00  |
| 2572232061 | t3m_00417 | Locus_type     | CDS                                                                                 |           |
| 2572232061 | t3m_00417 | Product_name   | lipoate synthase                                                                    |           |
| 2572232061 | t3m_00417 | Scaffold       | t3m_contig_70_43_len_54376_read_count_5056668.6                                     |           |
| 2572232061 | t3m_00417 | Coordinates    | 39856..40770(-)                                                                     |           |
| 2572232061 | t3m_00417 | DNA_length     | 915bp                                                                               |           |
| 2572232061 | t3m_00417 | Protein_length | 304aa                                                                               |           |
| 2572232061 | t3m_00417 | GC             |                                                                                     | 0.72      |
| 2572232062 | t3m_00418 | COG_category   | [L] Replication, recombination and repair                                           |           |
| 2572232062 | t3m_00418 | COG_category   | [O] Posttranslational modification, protein turnover, chaperones                    |           |
| 2572232062 | t3m_00418 | COG1474        | Cdc6-related protein, AAA superfamily ATPase                                        | 7.00E-43  |
| 2572232062 | t3m_00418 | pfam13401      | AAA_22                                                                              | 1.50E-10  |
| 2572232062 | t3m_00418 | pfam09079      | Cdc6_C                                                                              | 6.80E-07  |
| 2572232062 | t3m_00418 | TIGR02928      | orc1/cdc6 family replication initiation protein                                     | 9.30E-60  |
| 2572232062 | t3m_00418 | KO:K10725      | archaeal cell division control protein 6                                            | 7.10E-41  |
| 2572232062 | t3m_00418 | Locus_type     | CDS                                                                                 |           |
| 2572232062 | t3m_00418 | Product_name   | orc1/cdc6 family replication initiation protein                                     |           |
| 2572232062 | t3m_00418 | Scaffold       | t3m_contig_70_43_len_54376_read_count_5056668.6                                     |           |
| 2572232062 | t3m_00418 | Coordinates    | 40795..41952(-)                                                                     |           |
| 2572232062 | t3m_00418 | DNA_length     | 1158bp                                                                              |           |
| 2572232062 | t3m_00418 | Protein_length | 385aa                                                                               |           |
| 2572232062 | t3m_00418 | GC             |                                                                                     | 0.68      |
| 2572232063 | t3m_00419 | KEGG_module    | M00053: Pyrimidine deoxyribonucleotide biosynthesis, CDP/CTP => dCDP/dCTP,dTDP/dTTP |           |
| 2572232063 | t3m_00419 | COG_category   | [F] Nucleotide transport and metabolism                                             |           |
| 2572232063 | t3m_00419 | COG0125        | Thymidylate kinase                                                                  | 2.00E-27  |
| 2572232063 | t3m_00419 | pfam02223      | Thymidylate_kin                                                                     | 8.50E-29  |

|            |           |                |                                                                |          |
|------------|-----------|----------------|----------------------------------------------------------------|----------|
| 2572232063 | t3m_00419 | EC:2.7.4.9     | dTMP kinase.                                                   |          |
| 2572232063 | t3m_00419 | TIGR00041      | thymidylate kinase                                             | 5.90E-33 |
| 2572232063 | t3m_00419 | KO:K00943      | dTMP kinase [EC:2.7.4.9]                                       | 5.30E-18 |
| 2572232063 | t3m_00419 | Locus_type     | CDS                                                            |          |
| 2572232063 | t3m_00419 | Product_name   | thymidylate kinase                                             |          |
| 2572232063 | t3m_00419 | Scaffold       | t3m_contig_70_43_len_54376_read_count_5056668.6                |          |
| 2572232063 | t3m_00419 | Coordinates    | 41984..42616(-)                                                |          |
| 2572232063 | t3m_00419 | DNA_length     | 633bp                                                          |          |
| 2572232063 | t3m_00419 | Protein_length | 210aa                                                          |          |
| 2572232063 | t3m_00419 | GC             |                                                                | 0.73     |
| 2572232064 | t3m_00420 | COG_category   | [R] General function prediction only                           |          |
| 2572232064 | t3m_00420 | COG1831        | Predicted metal-dependent hydrolase (urease superfamily)       | 1.00E-61 |
| 2572232064 | t3m_00420 | pfam01026      | TatD_DNase                                                     | 2.10E-21 |
| 2572232064 | t3m_00420 | KO:K07049      | TatD-related deoxyribonuclease                                 | 2.20E-42 |
| 2572232064 | t3m_00420 | Locus_type     | CDS                                                            |          |
| 2572232064 | t3m_00420 | Product_name   | Predicted metal-dependent hydrolase (urease superfamily)       |          |
| 2572232064 | t3m_00420 | Scaffold       | t3m_contig_70_43_len_54376_read_count_5056668.6                |          |
| 2572232064 | t3m_00420 | Coordinates    | 42613..43488(-)                                                |          |
| 2572232064 | t3m_00420 | DNA_length     | 876bp                                                          |          |
| 2572232064 | t3m_00420 | Protein_length | 291aa                                                          |          |
| 2572232064 | t3m_00420 | GC             |                                                                | 0.71     |
| 2572232065 | t3m_00421 | COG_category   | [K] Transcription                                              |          |
| 2572232065 | t3m_00421 | COG2101        | TATA-box binding protein (TBP), component of TFIID and TFIIB   | 1.00E-67 |
| 2572232065 | t3m_00421 | pfam00352      | TBP                                                            | 1.10E-31 |
| 2572232065 | t3m_00421 | pfam00352      | TBP                                                            | 8.20E-31 |
| 2572232065 | t3m_00421 | KO:K03120      | transcription initiation factor TFIID TATA-box-binding protein | 0.00E+00 |
| 2572232065 | t3m_00421 | ITERM:01960    | TATA binding protein of transcription factor TFIID             |          |
| 2572232065 | t3m_00421 | Locus_type     | CDS                                                            |          |
| 2572232065 | t3m_00421 | Product_name   | TATA binding protein of transcription factor TFIID             |          |
| 2572232065 | t3m_00421 | Scaffold       | t3m_contig_70_43_len_54376_read_count_5056668.6                |          |
| 2572232065 | t3m_00421 | Coordinates    | 43512..44060(-)                                                |          |
| 2572232065 | t3m_00421 | DNA_length     | 549bp                                                          |          |

|            |           |                |                                                                        |  |          |
|------------|-----------|----------------|------------------------------------------------------------------------|--|----------|
| 2572232065 | t3m_00421 | Protein_length | 182aa                                                                  |  |          |
| 2572232065 | t3m_00421 | GC             |                                                                        |  | 0.64     |
| 2572232066 | t3m_00422 | Locus_type     | CDS                                                                    |  |          |
| 2572232066 | t3m_00422 | Product_name   | hypothetical protein                                                   |  |          |
| 2572232066 | t3m_00422 | Scaffold       | t3m_contig_70_43_len_54376_read_count_5056668.6                        |  |          |
| 2572232066 | t3m_00422 | Coordinates    | 44176..44628(-)                                                        |  |          |
| 2572232066 | t3m_00422 | DNA_length     | 453bp                                                                  |  |          |
| 2572232066 | t3m_00422 | Protein_length | 150aa                                                                  |  |          |
| 2572232066 | t3m_00422 | GC             |                                                                        |  | 0.67     |
| 2572232066 | t3m_00422 | Transmembrane  | Yes                                                                    |  |          |
| 2572232067 | t3m_00423 | COG_category   | [F] Nucleotide transport and metabolism                                |  |          |
| 2572232067 | t3m_00423 | COG1051        | ADP-ribose pyrophosphatase                                             |  | 4.00E-06 |
| 2572232067 | t3m_00423 | pfam00293      | NUDIX                                                                  |  | 1.40E-13 |
| 2572232067 | t3m_00423 | Locus_type     | CDS                                                                    |  |          |
| 2572232067 | t3m_00423 | Product_name   | ADP-ribose pyrophosphatase                                             |  |          |
| 2572232067 | t3m_00423 | Scaffold       | t3m_contig_70_43_len_54376_read_count_5056668.6                        |  |          |
| 2572232067 | t3m_00423 | Coordinates    | 44688..45332(-)                                                        |  |          |
| 2572232067 | t3m_00423 | DNA_length     | 645bp                                                                  |  |          |
| 2572232067 | t3m_00423 | Protein_length | 214aa                                                                  |  |          |
| 2572232067 | t3m_00423 | GC             |                                                                        |  | 0.7      |
| 2572232068 | t3m_00424 | Locus_type     | CDS                                                                    |  |          |
| 2572232068 | t3m_00424 | Product_name   | hypothetical protein                                                   |  |          |
| 2572232068 | t3m_00424 | Scaffold       | t3m_contig_70_43_len_54376_read_count_5056668.6                        |  |          |
| 2572232068 | t3m_00424 | Coordinates    | 45329..45529(-)                                                        |  |          |
| 2572232068 | t3m_00424 | DNA_length     | 201bp                                                                  |  |          |
| 2572232068 | t3m_00424 | Protein_length | 66aa                                                                   |  |          |
| 2572232068 | t3m_00424 | GC             |                                                                        |  | 0.64     |
| 2572232069 | t3m_00425 | COG_category   | [R] General function prediction only                                   |  |          |
| 2572232069 | t3m_00425 | COG0596        | Predicted hydrolases or acyltransferases (alpha/beta hydrolase superfa |  | 4.00E-20 |
| 2572232069 | t3m_00425 | pfam12697      | Abhydrolase_6                                                          |  | 2.30E-36 |



|            |           |                |                                                                         |          |
|------------|-----------|----------------|-------------------------------------------------------------------------|----------|
| 2572232069 | t3m_00425 | Locus_type     | CDS                                                                     |          |
| 2572232069 | t3m_00425 | Product_name   | Predicted hydrolases or acyltransferases (alpha/beta hydrolase superfan |          |
| 2572232069 | t3m_00425 | Scaffold       | t3m_contig_70_43_len_54376_read_count_5056668.6                         |          |
| 2572232069 | t3m_00425 | Coordinates    | 45557..46378(-)                                                         |          |
| 2572232069 | t3m_00425 | DNA_length     | 822bp                                                                   |          |
| 2572232069 | t3m_00425 | Protein_length | 273aa                                                                   |          |
| 2572232069 | t3m_00425 | GC             |                                                                         | 0.66     |
|            |           |                |                                                                         |          |
| 2572232070 | t3m_00426 | pfam02568      | Thil                                                                    | 1.70E-54 |
| 2572232070 | t3m_00426 | TIGR00342      | tRNA sulfurtransferase Thil                                             | 3.40E-57 |
| 2572232070 | t3m_00426 | KO:K03151      | thiamine biosynthesis protein Thil                                      | 0.00E+00 |
| 2572232070 | t3m_00426 | Locus_type     | CDS                                                                     |          |
| 2572232070 | t3m_00426 | Product_name   | Thiamine biosynthesis protein (Thil)                                    |          |
| 2572232070 | t3m_00426 | Scaffold       | t3m_contig_70_43_len_54376_read_count_5056668.6                         |          |
| 2572232070 | t3m_00426 | Coordinates    | 46472..47098(+)                                                         |          |
| 2572232070 | t3m_00426 | DNA_length     | 627bp                                                                   |          |
| 2572232070 | t3m_00426 | Protein_length | 208aa                                                                   |          |
| 2572232070 | t3m_00426 | GC             |                                                                         | 0.64     |
|            |           |                |                                                                         |          |
| 2572232071 | t3m_00427 | pfam13248      | zf-ribbon_3                                                             | 2.30E-07 |
| 2572232071 | t3m_00427 | Locus_type     | CDS                                                                     |          |
| 2572232071 | t3m_00427 | Product_name   | zinc-ribbon domain                                                      |          |
| 2572232071 | t3m_00427 | Scaffold       | t3m_contig_70_43_len_54376_read_count_5056668.6                         |          |
| 2572232071 | t3m_00427 | Coordinates    | 47177..47749(+)                                                         |          |
| 2572232071 | t3m_00427 | DNA_length     | 573bp                                                                   |          |
| 2572232071 | t3m_00427 | Protein_length | 190aa                                                                   |          |
| 2572232071 | t3m_00427 | GC             |                                                                         | 0.64     |
| 2572232071 | t3m_00427 | Transmembrane  | Yes                                                                     |          |
|            |           |                |                                                                         |          |
| 2572232072 | t3m_00428 | Locus_type     | CDS                                                                     |          |
| 2572232072 | t3m_00428 | Product_name   | hypothetical protein                                                    |          |
| 2572232072 | t3m_00428 | Scaffold       | t3m_contig_70_43_len_54376_read_count_5056668.6                         |          |
| 2572232072 | t3m_00428 | Coordinates    | 47849..48154(+)                                                         |          |
| 2572232072 | t3m_00428 | DNA_length     | 306bp                                                                   |          |

|            |           |                |                                                                                     |           |
|------------|-----------|----------------|-------------------------------------------------------------------------------------|-----------|
| 2572232072 | t3m_00428 | Protein_length | 101aa                                                                               |           |
| 2572232072 | t3m_00428 | GC             |                                                                                     | 0.67      |
| 2572232073 | t3m_00429 | KEGG_module    | M00086: beta-Oxidation, acyl-CoA synthesis                                          |           |
| 2572232073 | t3m_00429 | Metacyc        | PWY-6001: linoleate biosynthesis II (animals)                                       |           |
| 2572232073 | t3m_00429 | Metacyc        | PWY-6944: androstenedione degradation                                               |           |
| 2572232073 | t3m_00429 | Metacyc        | PWY-6920: 6-gingerol analog biosynthesis                                            |           |
| 2572232073 | t3m_00429 | Metacyc        | PWY-7053: docosahexanoate biosynthesis I                                            |           |
| 2572232073 | t3m_00429 | Metacyc        | PWY-5995: linoleate biosynthesis I (plants)                                         |           |
| 2572232073 | t3m_00429 | Metacyc        | PWY-5885: wax esters biosynthesis II                                                |           |
| 2572232073 | t3m_00429 | Metacyc        | P221-PWY: octane oxidation                                                          |           |
| 2572232073 | t3m_00429 | Metacyc        | PWY66-388: fatty acid &alpha;-oxidation III                                         |           |
| 2572232073 | t3m_00429 | Metacyc        | PWY-6945: cholesterol degradation to androstenedione I (cholesterol oxidase)        |           |
| 2572232073 | t3m_00429 | Metacyc        | PWY-7094: fatty acid salvage                                                        |           |
| 2572232073 | t3m_00429 | Metacyc        | PWY66-389: phytol degradation                                                       |           |
| 2572232073 | t3m_00429 | Metacyc        | PWY-6000: &gamma;-linolenate biosynthesis II (animals)                              |           |
| 2572232073 | t3m_00429 | Metacyc        | PWY-5353: arachidonate biosynthesis                                                 |           |
| 2572232073 | t3m_00429 | Metacyc        | PWY-7049: eicosapentaenoate biosynthesis II (metazoa)                               |           |
| 2572232073 | t3m_00429 | Metacyc        | PWY-5972: stearate biosynthesis I (animals)                                         |           |
| 2572232073 | t3m_00429 | Metacyc        | PWY66-391: fatty acid &beta;-oxidation VI (peroxisome)                              |           |
| 2572232073 | t3m_00429 | Metacyc        | FAO-PWY: fatty acid &beta;-oxidation I                                              |           |
| 2572232073 | t3m_00429 | Metacyc        | PWY66-387: fatty acid &alpha;-oxidation II                                          |           |
| 2572232073 | t3m_00429 | Metacyc        | PWY-5136: fatty acid &beta;-oxidation II (peroxisome)                               |           |
| 2572232073 | t3m_00429 | Metacyc        | PWY-6946: cholesterol degradation to androstenedione II (cholesterol dehydrogenase) |           |
| 2572232073 | t3m_00429 | Metacyc        | PWY-7033: alkane biosynthesis II                                                    |           |
| 2572232073 | t3m_00429 | Metacyc        | PWY-7035: (<i>Z</i>)-9-tricosene biosynthesis                                       |           |
| 2572232073 | t3m_00429 | Metacyc        | PWY-5143: fatty acid activation                                                     |           |
| 2572232073 | t3m_00429 | Metacyc        | PWY-6803: phosphatidylcholine acyl editing                                          |           |
| 2572232073 | t3m_00429 | Metacyc        | PWY-6951: docosahexanoate biosynthesis II                                           |           |
| 2572232073 | t3m_00429 | Metacyc        | PWY-6873: long chain fatty acid ester synthesis for microdiesel production          |           |
| 2572232073 | t3m_00429 | COG_category   | [Q] Secondary metabolites biosynthesis, transport and catabolism                    |           |
| 2572232073 | t3m_00429 | COG_category   | [I] Lipid transport and metabolism                                                  |           |
| 2572232073 | t3m_00429 | COG0318        | Acyl-CoA synthetases (AMP-forming)/AMP-acid ligases II                              | 5.00E-124 |
| 2572232073 | t3m_00429 | pfam13193      | AMP-binding_C                                                                       | 1.10E-18  |

|            |           |                |                                                                                  |           |
|------------|-----------|----------------|----------------------------------------------------------------------------------|-----------|
| 2572232073 | t3m_00429 | pfam00501      | AMP-binding                                                                      | 1.40E-105 |
| 2572232073 | t3m_00429 | EC:6.2.1.3     | Long-chain-fatty-acid--CoA ligase.                                               |           |
| 2572232073 | t3m_00429 | KO:K01897      | long-chain acyl-CoA synthetase [EC:6.2.1.3]                                      | 0.00E+00  |
| 2572232073 | t3m_00429 | Locus_type     | CDS                                                                              |           |
| 2572232073 | t3m_00429 | Product_name   | Acyl-CoA synthetases (AMP-forming)/AMP-acid ligases II                           |           |
| 2572232073 | t3m_00429 | Scaffold       | t3m_contig_70_43_len_54376_read_count_5056668.6                                  |           |
| 2572232073 | t3m_00429 | Coordinates    | 48162..49898(+)                                                                  |           |
| 2572232073 | t3m_00429 | DNA_length     | 1737bp                                                                           |           |
| 2572232073 | t3m_00429 | Protein_length | 578aa                                                                            |           |
| 2572232073 | t3m_00429 | GC             |                                                                                  | 0.68      |
| 2572232074 | t3m_00430 | COG_category   | [R] General function prediction only                                             |           |
| 2572232074 | t3m_00430 | COG2270        | Permeases of the major facilitator superfamily                                   | 9.00E-10  |
| 2572232074 | t3m_00430 | pfam07690      | MFS_1                                                                            | 3.90E-19  |
| 2572232074 | t3m_00430 | pfam07690      | MFS_1                                                                            | 4.80E-16  |
| 2572232074 | t3m_00430 | Locus_type     | CDS                                                                              |           |
| 2572232074 | t3m_00430 | Product_name   | Permeases of the major facilitator superfamily                                   |           |
| 2572232074 | t3m_00430 | Scaffold       | t3m_contig_70_43_len_54376_read_count_5056668.6                                  |           |
| 2572232074 | t3m_00430 | Coordinates    | 49919..51100(+)                                                                  |           |
| 2572232074 | t3m_00430 | DNA_length     | 1182bp                                                                           |           |
| 2572232074 | t3m_00430 | Protein_length | 393aa                                                                            |           |
| 2572232074 | t3m_00430 | GC             |                                                                                  | 0.67      |
| 2572232074 | t3m_00430 | Transmembrane  | Yes                                                                              |           |
| 2572232075 | t3m_00431 | KEGG_module    | M00133: Polyamine biosynthesis, arginine => agmatine => putrescine => spermidine |           |
| 2572232075 | t3m_00431 | Metacyc        | PWY-6305: putrescine biosynthesis IV                                             |           |
| 2572232075 | t3m_00431 | Metacyc        | PWY0-823: arginine degradation III (arginine decarboxylase/agmatinase pathway)   |           |
| 2572232075 | t3m_00431 | Metacyc        | PWY-40: putrescine biosynthesis I                                                |           |
| 2572232075 | t3m_00431 | COG_category   | [E] Amino acid transport and metabolism                                          |           |
| 2572232075 | t3m_00431 | COG0010        | Arginase/agmatinase/formimionoglutamate hydrolase, arginase family               | 2.00E-54  |
| 2572232075 | t3m_00431 | pfam00491      | Arginase                                                                         | 9.30E-77  |
| 2572232075 | t3m_00431 | EC:3.5.3.11    | Agmatinase.                                                                      |           |
| 2572232075 | t3m_00431 | TIGR01230      | agmatinase                                                                       | 1.00E-75  |
| 2572232075 | t3m_00431 | KO:K01480      | agmatinase [EC:3.5.3.11]                                                         | 0.00E+00  |

|            |           |                |                                                                                                 |          |
|------------|-----------|----------------|-------------------------------------------------------------------------------------------------|----------|
| 2572232075 | t3m_00431 | Locus_type     | CDS                                                                                             |          |
| 2572232075 | t3m_00431 | Product_name   | agmatinase                                                                                      |          |
| 2572232075 | t3m_00431 | Scaffold       | t3m_contig_70_43_len_54376_read_count_5056668.6                                                 |          |
| 2572232075 | t3m_00431 | Coordinates    | 51149..52024(+)                                                                                 |          |
| 2572232075 | t3m_00431 | DNA_length     | 876bp                                                                                           |          |
| 2572232075 | t3m_00431 | Protein_length | 291aa                                                                                           |          |
| 2572232075 | t3m_00431 | GC             |                                                                                                 | 0.68     |
| 2572232076 | t3m_00432 | Metacyc        | PWY-5129: sphingolipid biosynthesis (plants)                                                    |          |
| 2572232076 | t3m_00432 | Metacyc        | LIPA-CORESYPN-PWY: Lipid A-core biosynthesis                                                    |          |
| 2572232076 | t3m_00432 | Metacyc        | PWY-5107: phytol salvage pathway                                                                |          |
| 2572232076 | t3m_00432 | Metacyc        | SPHINGOLIPID-SYN-PWY: sphingolipid biosynthesis (yeast)                                         |          |
| 2572232076 | t3m_00432 | Metacyc        | PWY-6577: farnesylcysteine salvage pathway                                                      |          |
| 2572232076 | t3m_00432 | Metacyc        | PWY-7077: <i>N</i>-acetyl-D-galactosamine degradation                                           |          |
| 2572232076 | t3m_00432 | Metacyc        | PWY-6626: CDP-2-glycerol biosynthesis                                                           |          |
| 2572232076 | t3m_00432 | Metacyc        | PWY-6682: dehydrophos biosynthesis                                                              |          |
| 2572232076 | t3m_00432 | COG_category   | [T] Signal transduction mechanisms                                                              |          |
| 2572232076 | t3m_00432 | COG3642        | Mn2+-dependent serine/threonine protein kinase                                                  | 9.00E-44 |
| 2572232076 | t3m_00432 | EC:2.7.1.-     | Transferases. Transferring phosphorous-containing groups. Phosphotransferases with an alcohol g |          |
| 2572232076 | t3m_00432 | TIGR03724      | Kae1-associated kinase Bud32                                                                    | 1.30E-53 |
| 2572232076 | t3m_00432 | KO:K07174      | Mn2+-dependent serine/threonine protein kinase [EC:2.7.1.-]                                     | 5.60E-27 |
| 2572232076 | t3m_00432 | Locus_type     | CDS                                                                                             |          |
| 2572232076 | t3m_00432 | Product_name   | Kae1-associated kinase Bud32                                                                    |          |
| 2572232076 | t3m_00432 | Scaffold       | t3m_contig_70_43_len_54376_read_count_5056668.6                                                 |          |
| 2572232076 | t3m_00432 | Coordinates    | 52039..52695(+)                                                                                 |          |
| 2572232076 | t3m_00432 | DNA_length     | 657bp                                                                                           |          |
| 2572232076 | t3m_00432 | Protein_length | 218aa                                                                                           |          |
| 2572232076 | t3m_00432 | GC             |                                                                                                 | 0.7      |
| 2572232077 | t3m_00433 | COG_category   | [G] Carbohydrate transport and metabolism                                                       |          |
| 2572232077 | t3m_00433 | COG0063        | Predicted sugar kinase                                                                          | 9.00E-44 |
| 2572232077 | t3m_00433 | pfam03853      | YjeF_N                                                                                          | 8.50E-34 |
| 2572232077 | t3m_00433 | pfam01256      | Carb_kinase                                                                                     | 2.80E-40 |
| 2572232077 | t3m_00433 | TIGR00196      | yjeF C-terminal region, hydroxyethylthiazole kinase-related                                     | 1.30E-51 |

|            |           |                |                                                                         |          |
|------------|-----------|----------------|-------------------------------------------------------------------------|----------|
| 2572232077 | t3m_00433 | TIGR00197      | yjeF N-terminal region                                                  | 8.90E-37 |
| 2572232077 | t3m_00433 | Locus_type     | CDS                                                                     |          |
| 2572232077 | t3m_00433 | Product_name   | yjeF C-terminal region, hydroxyethylthiazole kinase-related/yjeF N-term |          |
| 2572232077 | t3m_00433 | Scaffold       | t3m_contig_70_43_len_54376_read_count_5056668.6                         |          |
| 2572232077 | t3m_00433 | Coordinates    | 52711..54207(-)                                                         |          |
| 2572232077 | t3m_00433 | DNA_length     | 1497bp                                                                  |          |
| 2572232077 | t3m_00433 | Protein_length | 498aa                                                                   |          |
| 2572232077 | t3m_00433 | GC             |                                                                         | 0.71     |
| 2572232077 | t3m_00433 | Fused_gene     | Yes                                                                     |          |
| 2572232078 | t3m_00434 | TIGR00523      | eukaryotic/archaeal initiation factor 1A                                | 7.60E-13 |
| 2572232078 | t3m_00434 | Locus_type     | CDS                                                                     |          |
| 2572232078 | t3m_00434 | Product_name   | hypothetical protein                                                    |          |
| 2572232078 | t3m_00434 | Scaffold       | t3m_contig_70_43_len_54376_read_count_5056668.6                         |          |
| 2572232078 | t3m_00434 | Coordinates    | 54216..54374(-)                                                         |          |
| 2572232078 | t3m_00434 | DNA_length     | 159bp                                                                   |          |
| 2572232078 | t3m_00434 | Protein_length | 52aa                                                                    |          |
| 2572232078 | t3m_00434 | GC             |                                                                         | 0.64     |
| 2572232079 | t3m_00435 | Locus_type     | CDS                                                                     |          |
| 2572232079 | t3m_00435 | Product_name   | hypothetical protein                                                    |          |
| 2572232079 | t3m_00435 | Scaffold       | t3m_contig_70_54_len_49701_read_count_4695079.7                         |          |
| 2572232079 | t3m_00435 | Coordinates    | 1..324(-)                                                               |          |
| 2572232079 | t3m_00435 | DNA_length     | 324bp                                                                   |          |
| 2572232079 | t3m_00435 | Protein_length | 108aa                                                                   |          |
| 2572232079 | t3m_00435 | GC             |                                                                         | 0.63     |
| 2572232080 | t3m_00436 | Locus_type     | tRNA                                                                    |          |
| 2572232080 | t3m_00436 | Product_name   | tRNA_Pseudo_TGT                                                         |          |
| 2572232080 | t3m_00436 | Scaffold       | t3m_contig_70_54_len_49701_read_count_4695079.7                         |          |
| 2572232080 | t3m_00436 | Coordinates    | 492..563(+)                                                             |          |
| 2572232080 | t3m_00436 | DNA_length     | 72bp                                                                    |          |
| 2572232080 | t3m_00436 | GC             |                                                                         | 0.56     |

|            |           |              |                                                 |      |
|------------|-----------|--------------|-------------------------------------------------|------|
| 2572232081 | t3m_00437 | Locus_type   | tRNA                                            |      |
| 2572232081 | t3m_00437 | Product_name | tRNA_Thr_CGT                                    |      |
| 2572232081 | t3m_00437 | Scaffold     | t3m_contig_70_54_len_49701_read_count_4695079.7 |      |
| 2572232081 | t3m_00437 | Coordinates  | 568..638(+)                                     |      |
| 2572232081 | t3m_00437 | DNA_length   | 71bp                                            |      |
| 2572232081 | t3m_00437 | GC           |                                                 | 0.65 |
|            |           |              |                                                 |      |
| 2572232082 | t3m_00438 | Locus_type   | tRNA                                            |      |
| 2572232082 | t3m_00438 | Product_name | tRNA_Pseudo_GCA                                 |      |
| 2572232082 | t3m_00438 | Scaffold     | t3m_contig_70_54_len_49701_read_count_4695079.7 |      |
| 2572232082 | t3m_00438 | Coordinates  | 640..710(+)                                     |      |
| 2572232082 | t3m_00438 | DNA_length   | 71bp                                            |      |
| 2572232082 | t3m_00438 | GC           |                                                 | 0.68 |
|            |           |              |                                                 |      |
| 2572232083 | t3m_00439 | Locus_type   | tRNA                                            |      |
| 2572232083 | t3m_00439 | Product_name | tRNA_Thr_GGT                                    |      |
| 2572232083 | t3m_00439 | Scaffold     | t3m_contig_70_54_len_49701_read_count_4695079.7 |      |
| 2572232083 | t3m_00439 | Coordinates  | 718..788(+)                                     |      |
| 2572232083 | t3m_00439 | DNA_length   | 71bp                                            |      |
| 2572232083 | t3m_00439 | GC           |                                                 | 0.69 |
|            |           |              |                                                 |      |
| 2572232084 | t3m_00440 | Locus_type   | tRNA                                            |      |
| 2572232084 | t3m_00440 | Product_name | tRNA_Ala_GGC                                    |      |
| 2572232084 | t3m_00440 | Scaffold     | t3m_contig_70_54_len_49701_read_count_4695079.7 |      |
| 2572232084 | t3m_00440 | Coordinates  | 1151..1221(-)                                   |      |
| 2572232084 | t3m_00440 | DNA_length   | 71bp                                            |      |
| 2572232084 | t3m_00440 | GC           |                                                 | 0.65 |
|            |           |              |                                                 |      |
| 2572232085 | t3m_00441 | Locus_type   | tRNA                                            |      |
| 2572232085 | t3m_00441 | Product_name | tRNA_Met_CAT                                    |      |
| 2572232085 | t3m_00441 | Scaffold     | t3m_contig_70_54_len_49701_read_count_4695079.7 |      |
| 2572232085 | t3m_00441 | Coordinates  | 1274..1344(+)                                   |      |
| 2572232085 | t3m_00441 | DNA_length   | 71bp                                            |      |
| 2572232085 | t3m_00441 | GC           |                                                 | 0.63 |

|            |           |              |                                                 |      |
|------------|-----------|--------------|-------------------------------------------------|------|
| 2572232086 | t3m_00442 | Locus_type   | tRNA                                            |      |
| 2572232086 | t3m_00442 | Product_name | tRNA_Arg_TCT                                    |      |
| 2572232086 | t3m_00442 | Scaffold     | t3m_contig_70_54_len_49701_read_count_4695079.7 |      |
| 2572232086 | t3m_00442 | Coordinates  | 1404..1491(+)                                   |      |
| 2572232086 | t3m_00442 | DNA_length   | 88bp                                            |      |
| 2572232086 | t3m_00442 | GC           |                                                 | 0.62 |
|            |           |              |                                                 |      |
| 2572232087 | t3m_00443 | Locus_type   | tRNA                                            |      |
| 2572232087 | t3m_00443 | Product_name | tRNA_Gly_GCC                                    |      |
| 2572232087 | t3m_00443 | Scaffold     | t3m_contig_70_54_len_49701_read_count_4695079.7 |      |
| 2572232087 | t3m_00443 | Coordinates  | 1498..1568(+)                                   |      |
| 2572232087 | t3m_00443 | DNA_length   | 71bp                                            |      |
| 2572232087 | t3m_00443 | GC           |                                                 | 0.66 |
|            |           |              |                                                 |      |
| 2572232088 | t3m_00444 | Locus_type   | tRNA                                            |      |
| 2572232088 | t3m_00444 | Product_name | tRNA_Pseudo_GAT                                 |      |
| 2572232088 | t3m_00444 | Scaffold     | t3m_contig_70_54_len_49701_read_count_4695079.7 |      |
| 2572232088 | t3m_00444 | Coordinates  | 1583..1653(-)                                   |      |
| 2572232088 | t3m_00444 | DNA_length   | 71bp                                            |      |
| 2572232088 | t3m_00444 | GC           |                                                 | 0.58 |
|            |           |              |                                                 |      |
| 2572232089 | t3m_00445 | Locus_type   | tRNA                                            |      |
| 2572232089 | t3m_00445 | Product_name | tRNA_Ile_TAT                                    |      |
| 2572232089 | t3m_00445 | Scaffold     | t3m_contig_70_54_len_49701_read_count_4695079.7 |      |
| 2572232089 | t3m_00445 | Coordinates  | 1741..1815(-)                                   |      |
| 2572232089 | t3m_00445 | DNA_length   | 75bp                                            |      |
| 2572232089 | t3m_00445 | GC           |                                                 | 0.65 |
|            |           |              |                                                 |      |
| 2572232090 | t3m_00446 | Locus_type   | CDS                                             |      |
| 2572232090 | t3m_00446 | Product_name | hypothetical protein                            |      |
| 2572232090 | t3m_00446 | Scaffold     | t3m_contig_70_54_len_49701_read_count_4695079.7 |      |
| 2572232090 | t3m_00446 | Coordinates  | 1914..2096(-)                                   |      |
| 2572232090 | t3m_00446 | DNA_length   | 183bp                                           |      |

|            |           |                |                                                 |      |
|------------|-----------|----------------|-------------------------------------------------|------|
| 2572232090 | t3m_00446 | Protein_length | 60aa                                            |      |
| 2572232090 | t3m_00446 | GC             |                                                 | 0.57 |
| 2572232091 | t3m_00447 | Locus_type     | CDS                                             |      |
| 2572232091 | t3m_00447 | Product_name   | hypothetical protein                            |      |
| 2572232091 | t3m_00447 | Scaffold       | t3m_contig_70_54_len_49701_read_count_4695079.7 |      |
| 2572232091 | t3m_00447 | Coordinates    | 2138..2362(-)                                   |      |
| 2572232091 | t3m_00447 | DNA_length     | 225bp                                           |      |
| 2572232091 | t3m_00447 | Protein_length | 74aa                                            |      |
| 2572232091 | t3m_00447 | GC             |                                                 | 0.63 |
| 2572232092 | t3m_00448 | Locus_type     | tRNA                                            |      |
| 2572232092 | t3m_00448 | Product_name   | tRNA_Lys_TTT                                    |      |
| 2572232092 | t3m_00448 | Scaffold       | t3m_contig_70_54_len_49701_read_count_4695079.7 |      |
| 2572232092 | t3m_00448 | Coordinates    | 2475..2547(-)                                   |      |
| 2572232092 | t3m_00448 | DNA_length     | 73bp                                            |      |
| 2572232092 | t3m_00448 | GC             |                                                 | 0.6  |
| 2572232093 | t3m_00449 | Locus_type     | tRNA                                            |      |
| 2572232093 | t3m_00449 | Product_name   | tRNA_Glu_TTC                                    |      |
| 2572232093 | t3m_00449 | Scaffold       | t3m_contig_70_54_len_49701_read_count_4695079.7 |      |
| 2572232093 | t3m_00449 | Coordinates    | 2557..2629(-)                                   |      |
| 2572232093 | t3m_00449 | DNA_length     | 73bp                                            |      |
| 2572232093 | t3m_00449 | GC             |                                                 | 0.62 |
| 2572232094 | t3m_00450 | Locus_type     | tRNA                                            |      |
| 2572232094 | t3m_00450 | Product_name   | tRNA_Asp_GTC                                    |      |
| 2572232094 | t3m_00450 | Scaffold       | t3m_contig_70_54_len_49701_read_count_4695079.7 |      |
| 2572232094 | t3m_00450 | Coordinates    | 2818..2888(-)                                   |      |
| 2572232094 | t3m_00450 | DNA_length     | 71bp                                            |      |
| 2572232094 | t3m_00450 | GC             |                                                 | 0.66 |
| 2572232095 | t3m_00451 | Locus_type     | tRNA                                            |      |
| 2572232095 | t3m_00451 | Product_name   | tRNA_Glu_CTC                                    |      |



|            |           |              |                                                 |
|------------|-----------|--------------|-------------------------------------------------|
| 2572232095 | t3m_00451 | Scaffold     | t3m_contig_70_54_len_49701_read_count_4695079.7 |
| 2572232095 | t3m_00451 | Coordinates  | 2895..2968(-)                                   |
| 2572232095 | t3m_00451 | DNA_length   | 74bp                                            |
| 2572232095 | t3m_00451 | GC           | 0.66                                            |
|            |           |              |                                                 |
| 2572232096 | t3m_00452 | Locus_type   | tRNA                                            |
| 2572232096 | t3m_00452 | Product_name | tRNA_Pseudo_GTA                                 |
| 2572232096 | t3m_00452 | Scaffold     | t3m_contig_70_54_len_49701_read_count_4695079.7 |
| 2572232096 | t3m_00452 | Coordinates  | 3023..3093(-)                                   |
| 2572232096 | t3m_00452 | DNA_length   | 71bp                                            |
| 2572232096 | t3m_00452 | GC           | 0.68                                            |
|            |           |              |                                                 |
| 2572232097 | t3m_00453 | Locus_type   | tRNA                                            |
| 2572232097 | t3m_00453 | Product_name | tRNA_Lys_CTT                                    |
| 2572232097 | t3m_00453 | Scaffold     | t3m_contig_70_54_len_49701_read_count_4695079.7 |
| 2572232097 | t3m_00453 | Coordinates  | 3122..3194(-)                                   |
| 2572232097 | t3m_00453 | DNA_length   | 73bp                                            |
| 2572232097 | t3m_00453 | GC           | 0.66                                            |
|            |           |              |                                                 |
| 2572232098 | t3m_00454 | Locus_type   | tRNA                                            |
| 2572232098 | t3m_00454 | Product_name | tRNA_Ala_CGC                                    |
| 2572232098 | t3m_00454 | Scaffold     | t3m_contig_70_54_len_49701_read_count_4695079.7 |
| 2572232098 | t3m_00454 | Coordinates  | 3451..3523(+)                                   |
| 2572232098 | t3m_00454 | DNA_length   | 73bp                                            |
| 2572232098 | t3m_00454 | GC           | 0.63                                            |
|            |           |              |                                                 |
| 2572232099 | t3m_00455 | Locus_type   | tRNA                                            |
| 2572232099 | t3m_00455 | Product_name | tRNA_Gly_TCC                                    |
| 2572232099 | t3m_00455 | Scaffold     | t3m_contig_70_54_len_49701_read_count_4695079.7 |
| 2572232099 | t3m_00455 | Coordinates  | 3620..3692(+)                                   |
| 2572232099 | t3m_00455 | DNA_length   | 73bp                                            |
| 2572232099 | t3m_00455 | GC           | 0.67                                            |
|            |           |              |                                                 |
| 2572232100 | t3m_00456 | Locus_type   | tRNA                                            |

|            |           |              |                                                 |      |
|------------|-----------|--------------|-------------------------------------------------|------|
| 2572232100 | t3m_00456 | Product_name | tRNA_Pseudo_CGA                                 |      |
| 2572232100 | t3m_00456 | Scaffold     | t3m_contig_70_54_len_49701_read_count_4695079.7 |      |
| 2572232100 | t3m_00456 | Coordinates  | 3866..3951(+)                                   |      |
| 2572232100 | t3m_00456 | DNA_length   | 86bp                                            |      |
| 2572232100 | t3m_00456 | GC           |                                                 | 0.58 |
|            |           |              |                                                 |      |
| 2572232101 | t3m_00457 | Locus_type   | tRNA                                            |      |
| 2572232101 | t3m_00457 | Product_name | tRNA_Trp_CCA                                    |      |
| 2572232101 | t3m_00457 | Scaffold     | t3m_contig_70_54_len_49701_read_count_4695079.7 |      |
| 2572232101 | t3m_00457 | Coordinates  | 3967..4041(+)                                   |      |
| 2572232101 | t3m_00457 | DNA_length   | 75bp                                            |      |
| 2572232101 | t3m_00457 | GC           |                                                 | 0.65 |
|            |           |              |                                                 |      |
| 2572232102 | t3m_00458 | Locus_type   | tRNA                                            |      |
| 2572232102 | t3m_00458 | Product_name | tRNA_Pro_TGG                                    |      |
| 2572232102 | t3m_00458 | Scaffold     | t3m_contig_70_54_len_49701_read_count_4695079.7 |      |
| 2572232102 | t3m_00458 | Coordinates  | 4055..4127(+)                                   |      |
| 2572232102 | t3m_00458 | DNA_length   | 73bp                                            |      |
| 2572232102 | t3m_00458 | GC           |                                                 | 0.66 |
|            |           |              |                                                 |      |
| 2572232103 | t3m_00459 | Locus_type   | tRNA                                            |      |
| 2572232103 | t3m_00459 | Product_name | tRNA_Leu_TAG                                    |      |
| 2572232103 | t3m_00459 | Scaffold     | t3m_contig_70_54_len_49701_read_count_4695079.7 |      |
| 2572232103 | t3m_00459 | Coordinates  | 4811..4894(+)                                   |      |
| 2572232103 | t3m_00459 | DNA_length   | 84bp                                            |      |
| 2572232103 | t3m_00459 | GC           |                                                 | 0.65 |
|            |           |              |                                                 |      |
| 2572232104 | t3m_00460 | Locus_type   | tRNA                                            |      |
| 2572232104 | t3m_00460 | Product_name | tRNA_Arg_GCG                                    |      |
| 2572232104 | t3m_00460 | Scaffold     | t3m_contig_70_54_len_49701_read_count_4695079.7 |      |
| 2572232104 | t3m_00460 | Coordinates  | 4902..4976(+)                                   |      |
| 2572232104 | t3m_00460 | DNA_length   | 75bp                                            |      |
| 2572232104 | t3m_00460 | GC           |                                                 | 0.64 |

|            |           |              |                                                 |      |
|------------|-----------|--------------|-------------------------------------------------|------|
| 2572232105 | t3m_00461 | Locus_type   | tRNA                                            |      |
| 2572232105 | t3m_00461 | Product_name | tRNA_Arg_TCG                                    |      |
| 2572232105 | t3m_00461 | Scaffold     | t3m_contig_70_54_len_49701_read_count_4695079.7 |      |
| 2572232105 | t3m_00461 | Coordinates  | 4989..5064(+)                                   |      |
| 2572232105 | t3m_00461 | DNA_length   | 76bp                                            |      |
| 2572232105 | t3m_00461 | GC           |                                                 | 0.67 |
|            |           |              |                                                 |      |
| 2572232106 | t3m_00462 | Locus_type   | tRNA                                            |      |
| 2572232106 | t3m_00462 | Product_name | tRNA_Pseudo_CAA                                 |      |
| 2572232106 | t3m_00462 | Scaffold     | t3m_contig_70_54_len_49701_read_count_4695079.7 |      |
| 2572232106 | t3m_00462 | Coordinates  | 5068..5150(+)                                   |      |
| 2572232106 | t3m_00462 | DNA_length   | 83bp                                            |      |
| 2572232106 | t3m_00462 | GC           |                                                 | 0.72 |
|            |           |              |                                                 |      |
| 2572232107 | t3m_00463 | Locus_type   | tRNA                                            |      |
| 2572232107 | t3m_00463 | Product_name | tRNA_Ser_GCT                                    |      |
| 2572232107 | t3m_00463 | Scaffold     | t3m_contig_70_54_len_49701_read_count_4695079.7 |      |
| 2572232107 | t3m_00463 | Coordinates  | 5161..5245(+)                                   |      |
| 2572232107 | t3m_00463 | DNA_length   | 85bp                                            |      |
| 2572232107 | t3m_00463 | GC           |                                                 | 0.68 |
|            |           |              |                                                 |      |
| 2572232108 | t3m_00464 | Locus_type   | tRNA                                            |      |
| 2572232108 | t3m_00464 | Product_name | tRNA_His_GTG                                    |      |
| 2572232108 | t3m_00464 | Scaffold     | t3m_contig_70_54_len_49701_read_count_4695079.7 |      |
| 2572232108 | t3m_00464 | Coordinates  | 5257..5327(-)                                   |      |
| 2572232108 | t3m_00464 | DNA_length   | 71bp                                            |      |
| 2572232108 | t3m_00464 | GC           |                                                 | 0.69 |
|            |           |              |                                                 |      |
| 2572232109 | t3m_00465 | Locus_type   | tRNA                                            |      |
| 2572232109 | t3m_00465 | Product_name | tRNA_Gln_TTG                                    |      |
| 2572232109 | t3m_00465 | Scaffold     | t3m_contig_70_54_len_49701_read_count_4695079.7 |      |
| 2572232109 | t3m_00465 | Coordinates  | 5330..5402(-)                                   |      |
| 2572232109 | t3m_00465 | DNA_length   | 73bp                                            |      |
| 2572232109 | t3m_00465 | GC           |                                                 | 0.59 |

|            |           |                |                                                 |      |
|------------|-----------|----------------|-------------------------------------------------|------|
| 2572232110 | t3m_00466 | Locus_type     | CDS                                             |      |
| 2572232110 | t3m_00466 | Product_name   | hypothetical protein                            |      |
| 2572232110 | t3m_00466 | Scaffold       | t3m_contig_70_54_len_49701_read_count_4695079.7 |      |
| 2572232110 | t3m_00466 | Coordinates    | 5573..5776(-)                                   |      |
| 2572232110 | t3m_00466 | DNA_length     | 204bp                                           |      |
| 2572232110 | t3m_00466 | Protein_length | 67aa                                            |      |
| 2572232110 | t3m_00466 | GC             |                                                 | 0.62 |
|            |           |                |                                                 |      |
| 2572232111 | t3m_00467 | Locus_type     | CDS                                             |      |
| 2572232111 | t3m_00467 | Product_name   | hypothetical protein                            |      |
| 2572232111 | t3m_00467 | Scaffold       | t3m_contig_70_54_len_49701_read_count_4695079.7 |      |
| 2572232111 | t3m_00467 | Coordinates    | 5962..6162(-)                                   |      |
| 2572232111 | t3m_00467 | DNA_length     | 201bp                                           |      |
| 2572232111 | t3m_00467 | Protein_length | 66aa                                            |      |
| 2572232111 | t3m_00467 | GC             |                                                 | 0.62 |
|            |           |                |                                                 |      |
| 2572232112 | t3m_00468 | Locus_type     | CDS                                             |      |
| 2572232112 | t3m_00468 | Product_name   | hypothetical protein                            |      |
| 2572232112 | t3m_00468 | Scaffold       | t3m_contig_70_54_len_49701_read_count_4695079.7 |      |
| 2572232112 | t3m_00468 | Coordinates    | 6170..6589(-)                                   |      |
| 2572232112 | t3m_00468 | DNA_length     | 420bp                                           |      |
| 2572232112 | t3m_00468 | Protein_length | 139aa                                           |      |
| 2572232112 | t3m_00468 | GC             |                                                 | 0.66 |
|            |           |                |                                                 |      |
| 2572232113 | t3m_00469 | Locus_type     | CDS                                             |      |
| 2572232113 | t3m_00469 | Product_name   | hypothetical protein                            |      |
| 2572232113 | t3m_00469 | Scaffold       | t3m_contig_70_54_len_49701_read_count_4695079.7 |      |
| 2572232113 | t3m_00469 | Coordinates    | 6590..6883(-)                                   |      |
| 2572232113 | t3m_00469 | DNA_length     | 294bp                                           |      |
| 2572232113 | t3m_00469 | Protein_length | 97aa                                            |      |
| 2572232113 | t3m_00469 | GC             |                                                 | 0.66 |
|            |           |                |                                                 |      |
| 2572232114 | t3m_00470 | Locus_type     | CDS                                             |      |

|            |           |                |                                                 |          |
|------------|-----------|----------------|-------------------------------------------------|----------|
| 2572232114 | t3m_00470 | Product_name   | hypothetical protein                            |          |
| 2572232114 | t3m_00470 | Scaffold       | t3m_contig_70_54_len_49701_read_count_4695079.7 |          |
| 2572232114 | t3m_00470 | Coordinates    | 6884..7501(-)                                   |          |
| 2572232114 | t3m_00470 | DNA_length     | 618bp                                           |          |
| 2572232114 | t3m_00470 | Protein_length | 205aa                                           |          |
| 2572232114 | t3m_00470 | GC             |                                                 | 0.65     |
|            |           |                |                                                 |          |
| 2572232115 | t3m_00471 | pfam00005      | ABC_tran                                        | 6.00E-10 |
| 2572232115 | t3m_00471 | Locus_type     | CDS                                             |          |
| 2572232115 | t3m_00471 | Product_name   | ABC transporter                                 |          |
| 2572232115 | t3m_00471 | Scaffold       | t3m_contig_70_54_len_49701_read_count_4695079.7 |          |
| 2572232115 | t3m_00471 | Coordinates    | 7495..9384(-)                                   |          |
| 2572232115 | t3m_00471 | DNA_length     | 1890bp                                          |          |
| 2572232115 | t3m_00471 | Protein_length | 629aa                                           |          |
| 2572232115 | t3m_00471 | GC             |                                                 | 0.65     |
|            |           |                |                                                 |          |
| 2572232116 | t3m_00472 | Locus_type     | CDS                                             |          |
| 2572232116 | t3m_00472 | Product_name   | hypothetical protein                            |          |
| 2572232116 | t3m_00472 | Scaffold       | t3m_contig_70_54_len_49701_read_count_4695079.7 |          |
| 2572232116 | t3m_00472 | Coordinates    | 9387..10202(-)                                  |          |
| 2572232116 | t3m_00472 | DNA_length     | 816bp                                           |          |
| 2572232116 | t3m_00472 | Protein_length | 271aa                                           |          |
| 2572232116 | t3m_00472 | GC             |                                                 | 0.65     |
|            |           |                |                                                 |          |
| 2572232117 | t3m_00473 | COG_category   | [L] Replication, recombination and repair       |          |
| 2572232117 | t3m_00473 | COG0417        | DNA polymerase elongation subunit (family B)    | 1.00E-61 |
| 2572232117 | t3m_00473 | pfam00136      | DNA_pol_B                                       | 6.40E-22 |
| 2572232117 | t3m_00473 | pfam03104      | DNA_pol_B_exo1                                  | 2.80E-11 |
| 2572232117 | t3m_00473 | EC:2.7.7.7     | DNA-directed DNA polymerase.                    |          |
| 2572232117 | t3m_00473 | KO:K02319      | DNA polymerase I [EC:2.7.7.7]                   | 0.00E+00 |
| 2572232117 | t3m_00473 | Locus_type     | CDS                                             |          |
| 2572232117 | t3m_00473 | Product_name   | DNA polymerase elongation subunit (family B)    |          |
| 2572232117 | t3m_00473 | Scaffold       | t3m_contig_70_54_len_49701_read_count_4695079.7 |          |
| 2572232117 | t3m_00473 | Coordinates    | 10196..12832(-)                                 |          |

|            |           |                |                                                 |          |
|------------|-----------|----------------|-------------------------------------------------|----------|
| 2572232117 | t3m_00473 | DNA_length     | 2637bp                                          |          |
| 2572232117 | t3m_00473 | Protein_length | 878aa                                           |          |
| 2572232117 | t3m_00473 | GC             |                                                 | 0.65     |
| 2572232118 | t3m_00474 | COG_category   | [L] Replication, recombination and repair       |          |
| 2572232118 | t3m_00474 | COG0863        | DNA modification methylase                      | 4.00E-22 |
| 2572232118 | t3m_00474 | pfam01555      | N6_N4_Mtase                                     | 4.90E-36 |
| 2572232118 | t3m_00474 | Locus_type     | CDS                                             |          |
| 2572232118 | t3m_00474 | Product_name   | DNA modification methylase                      |          |
| 2572232118 | t3m_00474 | Scaffold       | t3m_contig_70_54_len_49701_read_count_4695079.7 |          |
| 2572232118 | t3m_00474 | Coordinates    | 12826..13743(-)                                 |          |
| 2572232118 | t3m_00474 | DNA_length     | 918bp                                           |          |
| 2572232118 | t3m_00474 | Protein_length | 305aa                                           |          |
| 2572232118 | t3m_00474 | GC             |                                                 | 0.65     |
| 2572232119 | t3m_00475 | COG_category   | [S] Function unknown                            |          |
| 2572232119 | t3m_00475 | COG4333        | Uncharacterized protein conserved in bacteria   | 9.00E-38 |
| 2572232119 | t3m_00475 | pfam07799      | DUF1643                                         | 9.80E-45 |
| 2572232119 | t3m_00475 | Locus_type     | CDS                                             |          |
| 2572232119 | t3m_00475 | Product_name   | Uncharacterized protein conserved in bacteria   |          |
| 2572232119 | t3m_00475 | Scaffold       | t3m_contig_70_54_len_49701_read_count_4695079.7 |          |
| 2572232119 | t3m_00475 | Coordinates    | 13740..14264(-)                                 |          |
| 2572232119 | t3m_00475 | DNA_length     | 525bp                                           |          |
| 2572232119 | t3m_00475 | Protein_length | 174aa                                           |          |
| 2572232119 | t3m_00475 | GC             |                                                 | 0.63     |
| 2572232120 | t3m_00476 | Locus_type     | CDS                                             |          |
| 2572232120 | t3m_00476 | Product_name   | hypothetical protein                            |          |
| 2572232120 | t3m_00476 | Scaffold       | t3m_contig_70_54_len_49701_read_count_4695079.7 |          |
| 2572232120 | t3m_00476 | Coordinates    | 14257..14547(-)                                 |          |
| 2572232120 | t3m_00476 | DNA_length     | 291bp                                           |          |
| 2572232120 | t3m_00476 | Protein_length | 96aa                                            |          |
| 2572232120 | t3m_00476 | GC             |                                                 | 0.6      |

|            |           |                |                                                 |          |
|------------|-----------|----------------|-------------------------------------------------|----------|
| 2572232121 | t3m_00477 | Locus_type     | CDS                                             |          |
| 2572232121 | t3m_00477 | Product_name   | hypothetical protein                            |          |
| 2572232121 | t3m_00477 | Scaffold       | t3m_contig_70_54_len_49701_read_count_4695079.7 |          |
| 2572232121 | t3m_00477 | Coordinates    | 14544..14669(-)                                 |          |
| 2572232121 | t3m_00477 | DNA_length     | 126bp                                           |          |
| 2572232121 | t3m_00477 | Protein_length | 41aa                                            |          |
| 2572232121 | t3m_00477 | GC             |                                                 | 0.6      |
|            |           |                |                                                 |          |
| 2572232122 | t3m_00478 | Locus_type     | CDS                                             |          |
| 2572232122 | t3m_00478 | Product_name   | hypothetical protein                            |          |
| 2572232122 | t3m_00478 | Scaffold       | t3m_contig_70_54_len_49701_read_count_4695079.7 |          |
| 2572232122 | t3m_00478 | Coordinates    | 14666..14818(-)                                 |          |
| 2572232122 | t3m_00478 | DNA_length     | 153bp                                           |          |
| 2572232122 | t3m_00478 | Protein_length | 50aa                                            |          |
| 2572232122 | t3m_00478 | GC             |                                                 | 0.58     |
|            |           |                |                                                 |          |
| 2572232123 | t3m_00479 | pfam00004      | AAA                                             | 2.40E-16 |
| 2572232123 | t3m_00479 | KO:K04801      | replication factor C small subunit              | 0.00E+00 |
| 2572232123 | t3m_00479 | ITERM:00096    | replication factor C small subunit              |          |
| 2572232123 | t3m_00479 | Locus_type     | CDS                                             |          |
| 2572232123 | t3m_00479 | Product_name   | replication factor C small subunit              |          |
| 2572232123 | t3m_00479 | Scaffold       | t3m_contig_70_54_len_49701_read_count_4695079.7 |          |
| 2572232123 | t3m_00479 | Coordinates    | 14832..15761(-)                                 |          |
| 2572232123 | t3m_00479 | DNA_length     | 930bp                                           |          |
| 2572232123 | t3m_00479 | Protein_length | 309aa                                           |          |
| 2572232123 | t3m_00479 | GC             |                                                 | 0.65     |
|            |           |                |                                                 |          |
| 2572232124 | t3m_00480 | Locus_type     | CDS                                             |          |
| 2572232124 | t3m_00480 | Product_name   | hypothetical protein                            |          |
| 2572232124 | t3m_00480 | Scaffold       | t3m_contig_70_54_len_49701_read_count_4695079.7 |          |
| 2572232124 | t3m_00480 | Coordinates    | 15904..16116(-)                                 |          |
| 2572232124 | t3m_00480 | DNA_length     | 213bp                                           |          |
| 2572232124 | t3m_00480 | Protein_length | 70aa                                            |          |
| 2572232124 | t3m_00480 | GC             |                                                 | 0.57     |

|            |           |                |      |                                                 |          |
|------------|-----------|----------------|------|-------------------------------------------------|----------|
| 2572232125 | t3m_00481 | Locus_type     |      | CDS                                             |          |
| 2572232125 | t3m_00481 | Product_name   |      | hypothetical protein                            |          |
| 2572232125 | t3m_00481 | Scaffold       |      | t3m_contig_70_54_len_49701_read_count_4695079.7 |          |
| 2572232125 | t3m_00481 | Coordinates    |      | 16106..16288(-)                                 |          |
| 2572232125 | t3m_00481 | DNA_length     |      | 183bp                                           |          |
| 2572232125 | t3m_00481 | Protein_length |      | 60aa                                            |          |
| 2572232125 | t3m_00481 | GC             |      |                                                 | 0.67     |
|            |           |                |      |                                                 |          |
| 2572232126 | t3m_00482 | Locus_type     |      | CDS                                             |          |
| 2572232126 | t3m_00482 | Product_name   |      | hypothetical protein                            |          |
| 2572232126 | t3m_00482 | Scaffold       |      | t3m_contig_70_54_len_49701_read_count_4695079.7 |          |
| 2572232126 | t3m_00482 | Coordinates    |      | 16279..16425(-)                                 |          |
| 2572232126 | t3m_00482 | DNA_length     |      | 147bp                                           |          |
| 2572232126 | t3m_00482 | Protein_length |      | 48aa                                            |          |
| 2572232126 | t3m_00482 | GC             |      |                                                 | 0.66     |
|            |           |                |      |                                                 |          |
| 2572232127 | t3m_00483 | Locus_type     |      | CDS                                             |          |
| 2572232127 | t3m_00483 | Product_name   |      | hypothetical protein                            |          |
| 2572232127 | t3m_00483 | Scaffold       |      | t3m_contig_70_54_len_49701_read_count_4695079.7 |          |
| 2572232127 | t3m_00483 | Coordinates    |      | 16422..17630(-)                                 |          |
| 2572232127 | t3m_00483 | DNA_length     |      | 1209bp                                          |          |
| 2572232127 | t3m_00483 | Protein_length |      | 402aa                                           |          |
| 2572232127 | t3m_00483 | GC             |      |                                                 | 0.64     |
|            |           |                |      |                                                 |          |
| 2572232128 | t3m_00484 | Locus_type     |      | CDS                                             |          |
| 2572232128 | t3m_00484 | Product_name   |      | hypothetical protein                            |          |
| 2572232128 | t3m_00484 | Scaffold       |      | t3m_contig_70_54_len_49701_read_count_4695079.7 |          |
| 2572232128 | t3m_00484 | Coordinates    |      | 17647..18591(-)                                 |          |
| 2572232128 | t3m_00484 | DNA_length     |      | 945bp                                           |          |
| 2572232128 | t3m_00484 | Protein_length |      | 314aa                                           |          |
| 2572232128 | t3m_00484 | GC             |      |                                                 | 0.67     |
|            |           |                |      |                                                 |          |
| 2572232129 | t3m_00485 | pfam03837      | RecT |                                                 | 1.60E-18 |



|            |           |                |                                                 |          |
|------------|-----------|----------------|-------------------------------------------------|----------|
| 2572232129 | t3m_00485 | TIGR01913      | phage recombination protein Bet                 | 6.70E-22 |
| 2572232129 | t3m_00485 | Locus_type     | CDS                                             |          |
| 2572232129 | t3m_00485 | Product_name   | RecT family                                     |          |
| 2572232129 | t3m_00485 | Scaffold       | t3m_contig_70_54_len_49701_read_count_4695079.7 |          |
| 2572232129 | t3m_00485 | Coordinates    | 18588..19547(-)                                 |          |
| 2572232129 | t3m_00485 | DNA_length     | 960bp                                           |          |
| 2572232129 | t3m_00485 | Protein_length | 319aa                                           |          |
| 2572232129 | t3m_00485 | GC             |                                                 | 0.67     |
|            |           |                |                                                 |          |
| 2572232130 | t3m_00486 | Locus_type     | CDS                                             |          |
| 2572232130 | t3m_00486 | Product_name   | hypothetical protein                            |          |
| 2572232130 | t3m_00486 | Scaffold       | t3m_contig_70_54_len_49701_read_count_4695079.7 |          |
| 2572232130 | t3m_00486 | Coordinates    | 19552..20691(-)                                 |          |
| 2572232130 | t3m_00486 | DNA_length     | 1140bp                                          |          |
| 2572232130 | t3m_00486 | Protein_length | 379aa                                           |          |
| 2572232130 | t3m_00486 | GC             |                                                 | 0.66     |
|            |           |                |                                                 |          |
| 2572232131 | t3m_00487 | Locus_type     | CDS                                             |          |
| 2572232131 | t3m_00487 | Product_name   | hypothetical protein                            |          |
| 2572232131 | t3m_00487 | Scaffold       | t3m_contig_70_54_len_49701_read_count_4695079.7 |          |
| 2572232131 | t3m_00487 | Coordinates    | 20722..20889(-)                                 |          |
| 2572232131 | t3m_00487 | DNA_length     | 168bp                                           |          |
| 2572232131 | t3m_00487 | Protein_length | 55aa                                            |          |
| 2572232131 | t3m_00487 | GC             |                                                 | 0.57     |
| 2572232131 | t3m_00487 | Transmembrane  | Yes                                             |          |
|            |           |                |                                                 |          |
| 2572232132 | t3m_00488 | Locus_type     | CDS                                             |          |
| 2572232132 | t3m_00488 | Product_name   | hypothetical protein                            |          |
| 2572232132 | t3m_00488 | Scaffold       | t3m_contig_70_54_len_49701_read_count_4695079.7 |          |
| 2572232132 | t3m_00488 | Coordinates    | 21043..21339(+)                                 |          |
| 2572232132 | t3m_00488 | DNA_length     | 297bp                                           |          |
| 2572232132 | t3m_00488 | Protein_length | 98aa                                            |          |
| 2572232132 | t3m_00488 | GC             |                                                 | 0.61     |

|            |           |                |                                                                    |          |
|------------|-----------|----------------|--------------------------------------------------------------------|----------|
| 2572232133 | t3m_00489 | Locus_type     | CDS                                                                |          |
| 2572232133 | t3m_00489 | Product_name   | hypothetical protein                                               |          |
| 2572232133 | t3m_00489 | Scaffold       | t3m_contig_70_54_len_49701_read_count_4695079.7                    |          |
| 2572232133 | t3m_00489 | Coordinates    | 21336..22733(-)                                                    |          |
| 2572232133 | t3m_00489 | DNA_length     | 1398bp                                                             |          |
| 2572232133 | t3m_00489 | Protein_length | 465aa                                                              |          |
| 2572232133 | t3m_00489 | GC             |                                                                    | 0.66     |
|            |           |                |                                                                    |          |
| 2572232134 | t3m_00490 | Locus_type     | CDS                                                                |          |
| 2572232134 | t3m_00490 | Product_name   | hypothetical protein                                               |          |
| 2572232134 | t3m_00490 | Scaffold       | t3m_contig_70_54_len_49701_read_count_4695079.7                    |          |
| 2572232134 | t3m_00490 | Coordinates    | 22735..23385(-)                                                    |          |
| 2572232134 | t3m_00490 | DNA_length     | 651bp                                                              |          |
| 2572232134 | t3m_00490 | Protein_length | 216aa                                                              |          |
| 2572232134 | t3m_00490 | GC             |                                                                    | 0.66     |
|            |           |                |                                                                    |          |
| 2572232135 | t3m_00491 | pfam00271      | Helicase_C                                                         | 7.00E-10 |
| 2572232135 | t3m_00491 | pfam00176      | SNF2_N                                                             | 2.00E-16 |
| 2572232135 | t3m_00491 | Locus_type     | CDS                                                                |          |
| 2572232135 | t3m_00491 | Product_name   | Helicase conserved C-terminal domain/SNF2 family N-terminal domain |          |
| 2572232135 | t3m_00491 | Scaffold       | t3m_contig_70_54_len_49701_read_count_4695079.7                    |          |
| 2572232135 | t3m_00491 | Coordinates    | 23458..25407(-)                                                    |          |
| 2572232135 | t3m_00491 | DNA_length     | 1950bp                                                             |          |
| 2572232135 | t3m_00491 | Protein_length | 649aa                                                              |          |
| 2572232135 | t3m_00491 | GC             |                                                                    | 0.66     |
|            |           |                |                                                                    |          |
| 2572232136 | t3m_00492 | Locus_type     | CDS                                                                |          |
| 2572232136 | t3m_00492 | Product_name   | hypothetical protein                                               |          |
| 2572232136 | t3m_00492 | Scaffold       | t3m_contig_70_54_len_49701_read_count_4695079.7                    |          |
| 2572232136 | t3m_00492 | Coordinates    | 25556..26455(-)                                                    |          |
| 2572232136 | t3m_00492 | DNA_length     | 900bp                                                              |          |
| 2572232136 | t3m_00492 | Protein_length | 299aa                                                              |          |
| 2572232136 | t3m_00492 | GC             |                                                                    | 0.64     |

|            |           |                |                                                 |      |
|------------|-----------|----------------|-------------------------------------------------|------|
| 2572232137 | t3m_00493 | Locus_type     | CDS                                             |      |
| 2572232137 | t3m_00493 | Product_name   | hypothetical protein                            |      |
| 2572232137 | t3m_00493 | Scaffold       | t3m_contig_70_54_len_49701_read_count_4695079.7 |      |
| 2572232137 | t3m_00493 | Coordinates    | 26551..26850(-)                                 |      |
| 2572232137 | t3m_00493 | DNA_length     | 300bp                                           |      |
| 2572232137 | t3m_00493 | Protein_length | 99aa                                            |      |
| 2572232137 | t3m_00493 | GC             |                                                 | 0.67 |
|            |           |                |                                                 |      |
| 2572232138 | t3m_00494 | Locus_type     | CDS                                             |      |
| 2572232138 | t3m_00494 | Product_name   | hypothetical protein                            |      |
| 2572232138 | t3m_00494 | Scaffold       | t3m_contig_70_54_len_49701_read_count_4695079.7 |      |
| 2572232138 | t3m_00494 | Coordinates    | 26969..27604(-)                                 |      |
| 2572232138 | t3m_00494 | DNA_length     | 636bp                                           |      |
| 2572232138 | t3m_00494 | Protein_length | 211aa                                           |      |
| 2572232138 | t3m_00494 | GC             |                                                 | 0.63 |
|            |           |                |                                                 |      |
| 2572232139 | t3m_00495 | Locus_type     | CDS                                             |      |
| 2572232139 | t3m_00495 | Product_name   | hypothetical protein                            |      |
| 2572232139 | t3m_00495 | Scaffold       | t3m_contig_70_54_len_49701_read_count_4695079.7 |      |
| 2572232139 | t3m_00495 | Coordinates    | 27633..27797(-)                                 |      |
| 2572232139 | t3m_00495 | DNA_length     | 165bp                                           |      |
| 2572232139 | t3m_00495 | Protein_length | 54aa                                            |      |
| 2572232139 | t3m_00495 | GC             |                                                 | 0.61 |
|            |           |                |                                                 |      |
| 2572232140 | t3m_00496 | Locus_type     | CDS                                             |      |
| 2572232140 | t3m_00496 | Product_name   | hypothetical protein                            |      |
| 2572232140 | t3m_00496 | Scaffold       | t3m_contig_70_54_len_49701_read_count_4695079.7 |      |
| 2572232140 | t3m_00496 | Coordinates    | 28225..28380(+)                                 |      |
| 2572232140 | t3m_00496 | DNA_length     | 156bp                                           |      |
| 2572232140 | t3m_00496 | Protein_length | 51aa                                            |      |
| 2572232140 | t3m_00496 | GC             |                                                 | 0.62 |
| 2572232140 | t3m_00496 | Transmembrane  | Yes                                             |      |
|            |           |                |                                                 |      |
| 2572232141 | t3m_00497 | COG_category   | [M] Cell wall/membrane/envelope biogenesis      |      |

|            |           |                |                                            |                                                 |          |
|------------|-----------|----------------|--------------------------------------------|-------------------------------------------------|----------|
| 2572232141 | t3m_00497 | COG0438        | Glycosyltransferase                        |                                                 | 3.00E-24 |
| 2572232141 | t3m_00497 | pfam13579      | Glyco_trans_4_4                            |                                                 | 3.10E-22 |
| 2572232141 | t3m_00497 | pfam00534      | Glycos_transf_1                            |                                                 | 4.90E-23 |
| 2572232141 | t3m_00497 | Locus_type     |                                            | CDS                                             |          |
| 2572232141 | t3m_00497 | Product_name   |                                            | Glycosyltransferase                             |          |
| 2572232141 | t3m_00497 | Scaffold       |                                            | t3m_contig_70_54_len_49701_read_count_4695079.7 |          |
| 2572232141 | t3m_00497 | Coordinates    |                                            | 28377..29489(+)                                 |          |
| 2572232141 | t3m_00497 | DNA_length     |                                            | 1113bp                                          |          |
| 2572232141 | t3m_00497 | Protein_length |                                            | 370aa                                           |          |
| 2572232141 | t3m_00497 | GC             |                                            |                                                 | 0.64     |
|            |           |                |                                            |                                                 |          |
| 2572232142 | t3m_00498 | COG_category   | [M] Cell wall/membrane/envelope biogenesis |                                                 |          |
| 2572232142 | t3m_00498 | COG0438        | Glycosyltransferase                        |                                                 | 3.00E-33 |
| 2572232142 | t3m_00498 | pfam00534      | Glycos_transf_1                            |                                                 | 1.40E-19 |
| 2572232142 | t3m_00498 | pfam13579      | Glyco_trans_4_4                            |                                                 | 4.70E-13 |
| 2572232142 | t3m_00498 | Locus_type     |                                            | CDS                                             |          |
| 2572232142 | t3m_00498 | Product_name   |                                            | Glycosyltransferase                             |          |
| 2572232142 | t3m_00498 | Scaffold       |                                            | t3m_contig_70_54_len_49701_read_count_4695079.7 |          |
| 2572232142 | t3m_00498 | Coordinates    |                                            | 29486..30661(+)                                 |          |
| 2572232142 | t3m_00498 | DNA_length     |                                            | 1176bp                                          |          |
| 2572232142 | t3m_00498 | Protein_length |                                            | 391aa                                           |          |
| 2572232142 | t3m_00498 | GC             |                                            |                                                 | 0.66     |
|            |           |                |                                            |                                                 |          |
| 2572232143 | t3m_00499 | COG_category   | [M] Cell wall/membrane/envelope biogenesis |                                                 |          |
| 2572232143 | t3m_00499 | COG_category   | [G] Carbohydrate transport and metabolism  |                                                 |          |
| 2572232143 | t3m_00499 | COG0451        | Nucleoside-diphosphate-sugar epimerases    |                                                 | 3.00E-29 |
| 2572232143 | t3m_00499 | pfam01370      | Epimerase                                  |                                                 | 1.60E-31 |
| 2572232143 | t3m_00499 | Locus_type     |                                            | CDS                                             |          |
| 2572232143 | t3m_00499 | Product_name   |                                            | Nucleoside-diphosphate-sugar epimerases         |          |
| 2572232143 | t3m_00499 | Scaffold       |                                            | t3m_contig_70_54_len_49701_read_count_4695079.7 |          |
| 2572232143 | t3m_00499 | Coordinates    |                                            | 30636..31598(-)                                 |          |
| 2572232143 | t3m_00499 | DNA_length     |                                            | 963bp                                           |          |
| 2572232143 | t3m_00499 | Protein_length |                                            | 320aa                                           |          |
| 2572232143 | t3m_00499 | GC             |                                            |                                                 | 0.66     |

|            |           |                |                                                 |          |
|------------|-----------|----------------|-------------------------------------------------|----------|
| 2572232144 | t3m_00500 | COG_category   | [M] Cell wall/membrane/envelope biogenesis      |          |
| 2572232144 | t3m_00500 | COG0438        | Glycosyltransferase                             | 1.00E-31 |
| 2572232144 | t3m_00500 | pfam13579      | Glyco_trans_4_4                                 | 2.00E-07 |
| 2572232144 | t3m_00500 | pfam00534      | Glycos_transf_1                                 | 2.10E-33 |
| 2572232144 | t3m_00500 | Locus_type     | CDS                                             |          |
| 2572232144 | t3m_00500 | Product_name   | Glycosyltransferase                             |          |
| 2572232144 | t3m_00500 | Scaffold       | t3m_contig_70_54_len_49701_read_count_4695079.7 |          |
| 2572232144 | t3m_00500 | Coordinates    | 31595..32731(-)                                 |          |
| 2572232144 | t3m_00500 | DNA_length     | 1137bp                                          |          |
| 2572232144 | t3m_00500 | Protein_length | 378aa                                           |          |
| 2572232144 | t3m_00500 | GC             |                                                 | 0.65     |
|            |           |                |                                                 |          |
| 2572232145 | t3m_00501 | COG_category   | [M] Cell wall/membrane/envelope biogenesis      |          |
| 2572232145 | t3m_00501 | COG0438        | Glycosyltransferase                             | 2.00E-22 |
| 2572232145 | t3m_00501 | pfam13692      | Glyco_trans_1_4                                 | 8.10E-11 |
| 2572232145 | t3m_00501 | pfam13439      | Glyco_transf_4                                  | 2.60E-14 |
| 2572232145 | t3m_00501 | Locus_type     | CDS                                             |          |
| 2572232145 | t3m_00501 | Product_name   | Glycosyltransferase                             |          |
| 2572232145 | t3m_00501 | Scaffold       | t3m_contig_70_54_len_49701_read_count_4695079.7 |          |
| 2572232145 | t3m_00501 | Coordinates    | 32820..33851(-)                                 |          |
| 2572232145 | t3m_00501 | DNA_length     | 1032bp                                          |          |
| 2572232145 | t3m_00501 | Protein_length | 343aa                                           |          |
| 2572232145 | t3m_00501 | GC             |                                                 | 0.66     |
|            |           |                |                                                 |          |
| 2572232146 | t3m_00502 | pfam00535      | Glycos_transf_2                                 | 7.70E-13 |
| 2572232146 | t3m_00502 | Locus_type     | CDS                                             |          |
| 2572232146 | t3m_00502 | Product_name   | Glycosyl transferase family 2                   |          |
| 2572232146 | t3m_00502 | Scaffold       | t3m_contig_70_54_len_49701_read_count_4695079.7 |          |
| 2572232146 | t3m_00502 | Coordinates    | 33848..34780(-)                                 |          |
| 2572232146 | t3m_00502 | DNA_length     | 933bp                                           |          |
| 2572232146 | t3m_00502 | Protein_length | 310aa                                           |          |
| 2572232146 | t3m_00502 | GC             |                                                 | 0.64     |

|            |           |                |                 |                                                 |          |
|------------|-----------|----------------|-----------------|-------------------------------------------------|----------|
| 2572232147 | t3m_00503 | pfam13578      | Methyltransf_24 |                                                 | 1.30E-10 |
| 2572232147 | t3m_00503 | Locus_type     |                 | CDS                                             |          |
| 2572232147 | t3m_00503 | Product_name   |                 | Methyltransferase domain                        |          |
| 2572232147 | t3m_00503 | Scaffold       |                 | t3m_contig_70_54_len_49701_read_count_4695079.7 |          |
| 2572232147 | t3m_00503 | Coordinates    |                 | 34777..35508(-)                                 |          |
| 2572232147 | t3m_00503 | DNA_length     |                 | 732bp                                           |          |
| 2572232147 | t3m_00503 | Protein_length |                 | 243aa                                           |          |
| 2572232147 | t3m_00503 | GC             |                 |                                                 | 0.65     |
|            |           |                |                 |                                                 |          |
| 2572232148 | t3m_00504 | Locus_type     |                 | CDS                                             |          |
| 2572232148 | t3m_00504 | Product_name   |                 | hypothetical protein                            |          |
| 2572232148 | t3m_00504 | Scaffold       |                 | t3m_contig_70_54_len_49701_read_count_4695079.7 |          |
| 2572232148 | t3m_00504 | Coordinates    |                 | 35526..35675(-)                                 |          |
| 2572232148 | t3m_00504 | DNA_length     |                 | 150bp                                           |          |
| 2572232148 | t3m_00504 | Protein_length |                 | 49aa                                            |          |
| 2572232148 | t3m_00504 | GC             |                 |                                                 | 0.59     |
|            |           |                |                 |                                                 |          |
| 2572232149 | t3m_00505 | Locus_type     |                 | CDS                                             |          |
| 2572232149 | t3m_00505 | Product_name   |                 | hypothetical protein                            |          |
| 2572232149 | t3m_00505 | Scaffold       |                 | t3m_contig_70_54_len_49701_read_count_4695079.7 |          |
| 2572232149 | t3m_00505 | Coordinates    |                 | 35675..36070(-)                                 |          |
| 2572232149 | t3m_00505 | DNA_length     |                 | 396bp                                           |          |
| 2572232149 | t3m_00505 | Protein_length |                 | 131aa                                           |          |
| 2572232149 | t3m_00505 | GC             |                 |                                                 | 0.65     |
|            |           |                |                 |                                                 |          |
| 2572232150 | t3m_00506 | Locus_type     |                 | CDS                                             |          |
| 2572232150 | t3m_00506 | Product_name   |                 | hypothetical protein                            |          |
| 2572232150 | t3m_00506 | Scaffold       |                 | t3m_contig_70_54_len_49701_read_count_4695079.7 |          |
| 2572232150 | t3m_00506 | Coordinates    |                 | 36303..36548(-)                                 |          |
| 2572232150 | t3m_00506 | DNA_length     |                 | 246bp                                           |          |
| 2572232150 | t3m_00506 | Protein_length |                 | 81aa                                            |          |
| 2572232150 | t3m_00506 | GC             |                 |                                                 | 0.67     |
|            |           |                |                 |                                                 |          |
| 2572232151 | t3m_00507 | Locus_type     |                 | CDS                                             |          |

|            |           |                |                                                 |      |
|------------|-----------|----------------|-------------------------------------------------|------|
| 2572232151 | t3m_00507 | Product_name   | hypothetical protein                            |      |
| 2572232151 | t3m_00507 | Scaffold       | t3m_contig_70_54_len_49701_read_count_4695079.7 |      |
| 2572232151 | t3m_00507 | Coordinates    | 36706..36894(-)                                 |      |
| 2572232151 | t3m_00507 | DNA_length     | 189bp                                           |      |
| 2572232151 | t3m_00507 | Protein_length | 62aa                                            |      |
| 2572232151 | t3m_00507 | GC             |                                                 | 0.6  |
|            |           |                |                                                 |      |
| 2572232152 | t3m_00508 | Locus_type     | CDS                                             |      |
| 2572232152 | t3m_00508 | Product_name   | hypothetical protein                            |      |
| 2572232152 | t3m_00508 | Scaffold       | t3m_contig_70_54_len_49701_read_count_4695079.7 |      |
| 2572232152 | t3m_00508 | Coordinates    | 36891..37043(-)                                 |      |
| 2572232152 | t3m_00508 | DNA_length     | 153bp                                           |      |
| 2572232152 | t3m_00508 | Protein_length | 50aa                                            |      |
| 2572232152 | t3m_00508 | GC             |                                                 | 0.63 |
|            |           |                |                                                 |      |
| 2572232153 | t3m_00509 | Locus_type     | CDS                                             |      |
| 2572232153 | t3m_00509 | Product_name   | hypothetical protein                            |      |
| 2572232153 | t3m_00509 | Scaffold       | t3m_contig_70_54_len_49701_read_count_4695079.7 |      |
| 2572232153 | t3m_00509 | Coordinates    | 37040..37378(-)                                 |      |
| 2572232153 | t3m_00509 | DNA_length     | 339bp                                           |      |
| 2572232153 | t3m_00509 | Protein_length | 112aa                                           |      |
| 2572232153 | t3m_00509 | GC             |                                                 | 0.65 |
|            |           |                |                                                 |      |
| 2572232154 | t3m_00510 | Locus_type     | CDS                                             |      |
| 2572232154 | t3m_00510 | Product_name   | hypothetical protein                            |      |
| 2572232154 | t3m_00510 | Scaffold       | t3m_contig_70_54_len_49701_read_count_4695079.7 |      |
| 2572232154 | t3m_00510 | Coordinates    | 37375..37800(-)                                 |      |
| 2572232154 | t3m_00510 | DNA_length     | 426bp                                           |      |
| 2572232154 | t3m_00510 | Protein_length | 141aa                                           |      |
| 2572232154 | t3m_00510 | GC             |                                                 | 0.62 |
| 2572232154 | t3m_00510 | Transmembrane  | Yes                                             |      |
|            |           |                |                                                 |      |
| 2572232155 | t3m_00511 | Locus_type     | CDS                                             |      |
| 2572232155 | t3m_00511 | Product_name   | hypothetical protein                            |      |

|            |           |                |                                                 |
|------------|-----------|----------------|-------------------------------------------------|
| 2572232155 | t3m_00511 | Scaffold       | t3m_contig_70_54_len_49701_read_count_4695079.7 |
| 2572232155 | t3m_00511 | Coordinates    | 37797..38546(-)                                 |
| 2572232155 | t3m_00511 | DNA_length     | 750bp                                           |
| 2572232155 | t3m_00511 | Protein_length | 249aa                                           |
| 2572232155 | t3m_00511 | GC             | 0.63                                            |
| 2572232155 | t3m_00511 | Transmembrane  | Yes                                             |
|            |           |                |                                                 |
| 2572232156 | t3m_00512 | Locus_type     | CDS                                             |
| 2572232156 | t3m_00512 | Product_name   | hypothetical protein                            |
| 2572232156 | t3m_00512 | Scaffold       | t3m_contig_70_54_len_49701_read_count_4695079.7 |
| 2572232156 | t3m_00512 | Coordinates    | 38676..39038(-)                                 |
| 2572232156 | t3m_00512 | DNA_length     | 363bp                                           |
| 2572232156 | t3m_00512 | Protein_length | 120aa                                           |
| 2572232156 | t3m_00512 | GC             | 0.65                                            |
| 2572232156 | t3m_00512 | Transmembrane  | Yes                                             |
|            |           |                |                                                 |
| 2572232157 | t3m_00513 | Locus_type     | CDS                                             |
| 2572232157 | t3m_00513 | Product_name   | hypothetical protein                            |
| 2572232157 | t3m_00513 | Scaffold       | t3m_contig_70_54_len_49701_read_count_4695079.7 |
| 2572232157 | t3m_00513 | Coordinates    | 39045..39407(-)                                 |
| 2572232157 | t3m_00513 | DNA_length     | 363bp                                           |
| 2572232157 | t3m_00513 | Protein_length | 120aa                                           |
| 2572232157 | t3m_00513 | GC             | 0.61                                            |
| 2572232157 | t3m_00513 | Transmembrane  | Yes                                             |
|            |           |                |                                                 |
| 2572232158 | t3m_00514 | Locus_type     | CDS                                             |
| 2572232158 | t3m_00514 | Product_name   | hypothetical protein                            |
| 2572232158 | t3m_00514 | Scaffold       | t3m_contig_70_54_len_49701_read_count_4695079.7 |
| 2572232158 | t3m_00514 | Coordinates    | 39404..39574(-)                                 |
| 2572232158 | t3m_00514 | DNA_length     | 171bp                                           |
| 2572232158 | t3m_00514 | Protein_length | 56aa                                            |
| 2572232158 | t3m_00514 | GC             | 0.65                                            |
| 2572232158 | t3m_00514 | Transmembrane  | Yes                                             |



|            |           |                |     |                                                 |          |
|------------|-----------|----------------|-----|-------------------------------------------------|----------|
| 2572232159 | t3m_00515 | Locus_type     |     | CDS                                             |          |
| 2572232159 | t3m_00515 | Product_name   |     | hypothetical protein                            |          |
| 2572232159 | t3m_00515 | Scaffold       |     | t3m_contig_70_54_len_49701_read_count_4695079.7 |          |
| 2572232159 | t3m_00515 | Coordinates    |     | 39643..40419(-)                                 |          |
| 2572232159 | t3m_00515 | DNA_length     |     | 777bp                                           |          |
| 2572232159 | t3m_00515 | Protein_length |     | 258aa                                           |          |
| 2572232159 | t3m_00515 | GC             |     |                                                 | 0.6      |
| 2572232159 | t3m_00515 | Transmembrane  |     | Yes                                             |          |
|            |           |                |     |                                                 |          |
| 2572232160 | t3m_00516 | Locus_type     |     | CDS                                             |          |
| 2572232160 | t3m_00516 | Product_name   |     | hypothetical protein                            |          |
| 2572232160 | t3m_00516 | Scaffold       |     | t3m_contig_70_54_len_49701_read_count_4695079.7 |          |
| 2572232160 | t3m_00516 | Coordinates    |     | 40425..41834(-)                                 |          |
| 2572232160 | t3m_00516 | DNA_length     |     | 1410bp                                          |          |
| 2572232160 | t3m_00516 | Protein_length |     | 469aa                                           |          |
| 2572232160 | t3m_00516 | GC             |     |                                                 | 0.61     |
| 2572232160 | t3m_00516 | Transmembrane  |     | Yes                                             |          |
|            |           |                |     |                                                 |          |
| 2572232161 | t3m_00517 | Locus_type     |     | CDS                                             |          |
| 2572232161 | t3m_00517 | Product_name   |     | hypothetical protein                            |          |
| 2572232161 | t3m_00517 | Scaffold       |     | t3m_contig_70_54_len_49701_read_count_4695079.7 |          |
| 2572232161 | t3m_00517 | Coordinates    |     | 41831..45124(-)                                 |          |
| 2572232161 | t3m_00517 | DNA_length     |     | 3294bp                                          |          |
| 2572232161 | t3m_00517 | Protein_length |     | 1097aa                                          |          |
| 2572232161 | t3m_00517 | GC             |     |                                                 | 0.59     |
| 2572232161 | t3m_00517 | Transmembrane  |     | Yes                                             |          |
|            |           |                |     |                                                 |          |
| 2572232162 | t3m_00518 | pfam00041      | fn3 |                                                 | 8.60E-12 |
| 2572232162 | t3m_00518 | Locus_type     |     | CDS                                             |          |
| 2572232162 | t3m_00518 | Product_name   |     | Fibronectin type III domain                     |          |
| 2572232162 | t3m_00518 | Scaffold       |     | t3m_contig_70_54_len_49701_read_count_4695079.7 |          |
| 2572232162 | t3m_00518 | Coordinates    |     | 45121..48402(-)                                 |          |
| 2572232162 | t3m_00518 | DNA_length     |     | 3282bp                                          |          |
| 2572232162 | t3m_00518 | Protein_length |     | 1093aa                                          |          |

|            |           |                |                                                 |          |
|------------|-----------|----------------|-------------------------------------------------|----------|
| 2572232162 | t3m_00518 | GC             |                                                 | 0.62     |
| 2572232162 | t3m_00518 | Transmembrane  | Yes                                             |          |
| 2572232163 | t3m_00519 | Locus_type     | CDS                                             |          |
| 2572232163 | t3m_00519 | Product_name   | hypothetical protein                            |          |
| 2572232163 | t3m_00519 | Scaffold       | t3m_contig_70_54_len_49701_read_count_4695079.7 |          |
| 2572232163 | t3m_00519 | Coordinates    | 48477..49019(-)                                 |          |
| 2572232163 | t3m_00519 | DNA_length     | 543bp                                           |          |
| 2572232163 | t3m_00519 | Protein_length | 180aa                                           |          |
| 2572232163 | t3m_00519 | GC             |                                                 | 0.66     |
| 2572232164 | t3m_00520 | Locus_type     | CDS                                             |          |
| 2572232164 | t3m_00520 | Product_name   | hypothetical protein                            |          |
| 2572232164 | t3m_00520 | Scaffold       | t3m_contig_70_54_len_49701_read_count_4695079.7 |          |
| 2572232164 | t3m_00520 | Coordinates    | 49091..49681(-)                                 |          |
| 2572232164 | t3m_00520 | DNA_length     | 591bp                                           |          |
| 2572232164 | t3m_00520 | Protein_length | 196aa                                           |          |
| 2572232164 | t3m_00520 | GC             |                                                 | 0.62     |
| 2572232164 | t3m_00520 | Transmembrane  | Yes                                             |          |
| 2572232165 | t3m_00521 | pfam01496      | V_ATPase_I                                      | 4.50E-13 |
| 2572232165 | t3m_00521 | Locus_type     | CDS                                             |          |
| 2572232165 | t3m_00521 | Product_name   | V-type ATPase 116kDa subunit family             |          |
| 2572232165 | t3m_00521 | Scaffold       | t3m_contig_70_62_len_47528_read_count_3866024.8 |          |
| 2572232165 | t3m_00521 | Coordinates    | 2..952(-)                                       |          |
| 2572232165 | t3m_00521 | DNA_length     | 951bp                                           |          |
| 2572232165 | t3m_00521 | Protein_length | 317aa                                           |          |
| 2572232165 | t3m_00521 | GC             |                                                 | 0.71     |
| 2572232166 | t3m_00522 | Locus_type     | CDS                                             |          |
| 2572232166 | t3m_00522 | Product_name   | hypothetical protein                            |          |
| 2572232166 | t3m_00522 | Scaffold       | t3m_contig_70_62_len_47528_read_count_3866024.8 |          |
| 2572232166 | t3m_00522 | Coordinates    | 983..1342(-)                                    |          |
| 2572232166 | t3m_00522 | DNA_length     | 360bp                                           |          |

|            |           |                |                                                                    |          |
|------------|-----------|----------------|--------------------------------------------------------------------|----------|
| 2572232166 | t3m_00522 | Protein_length | 119aa                                                              |          |
| 2572232166 | t3m_00522 | GC             |                                                                    | 0.74     |
| 2572232167 | t3m_00523 | Locus_type     | CDS                                                                |          |
| 2572232167 | t3m_00523 | Product_name   | hypothetical protein                                               |          |
| 2572232167 | t3m_00523 | Scaffold       | t3m_contig_70_62_len_47528_read_count_3866024.8                    |          |
| 2572232167 | t3m_00523 | Coordinates    | 1345..1470(-)                                                      |          |
| 2572232167 | t3m_00523 | DNA_length     | 126bp                                                              |          |
| 2572232167 | t3m_00523 | Protein_length | 41aa                                                               |          |
| 2572232167 | t3m_00523 | GC             |                                                                    | 0.68     |
| 2572232167 | t3m_00523 | Transmembrane  | Yes                                                                |          |
| 2572232168 | t3m_00524 | KEGG_module    | M00159: V-type ATPase, prokaryotes                                 |          |
| 2572232168 | t3m_00524 | Metacyc        | PWY-6126: adenosine nucleotides <i>de novo</i> biosynthesis        |          |
| 2572232168 | t3m_00524 | COG_category   | [C] Energy production and conversion                               |          |
| 2572232168 | t3m_00524 | COG1394        | Archaeal/vacuolar-type H <sup>+</sup> -ATPase subunit D            | 2.00E-39 |
| 2572232168 | t3m_00524 | pfam01813      | ATP-synt_D                                                         | 3.30E-48 |
| 2572232168 | t3m_00524 | EC:3.6.3.14    | H(+)-transporting two-sector ATPase.                               |          |
| 2572232168 | t3m_00524 | TIGR00309      | H(+)-transporting ATP synthase, vacuolar type, subunit D           | 2.10E-47 |
| 2572232168 | t3m_00524 | KO:K02120      | V-type H <sup>+</sup> -transporting ATPase subunit D [EC:3.6.3.14] | 1.40E-45 |
| 2572232168 | t3m_00524 | Locus_type     | CDS                                                                |          |
| 2572232168 | t3m_00524 | Product_name   | H(+)-transporting ATP synthase, vacuolar type, subunit D           |          |
| 2572232168 | t3m_00524 | Scaffold       | t3m_contig_70_62_len_47528_read_count_3866024.8                    |          |
| 2572232168 | t3m_00524 | Coordinates    | 1454..2098(-)                                                      |          |
| 2572232168 | t3m_00524 | DNA_length     | 645bp                                                              |          |
| 2572232168 | t3m_00524 | Protein_length | 214aa                                                              |          |
| 2572232168 | t3m_00524 | GC             |                                                                    | 0.66     |
| 2572232169 | t3m_00525 | KEGG_module    | M00159: V-type ATPase, prokaryotes                                 |          |
| 2572232169 | t3m_00525 | Metacyc        | PWY-6126: adenosine nucleotides <i>de novo</i> biosynthesis        |          |
| 2572232169 | t3m_00525 | COG_category   | [C] Energy production and conversion                               |          |
| 2572232169 | t3m_00525 | COG1156        | Archaeal/vacuolar-type H <sup>+</sup> -ATPase subunit B            | 0.00E+00 |
| 2572232169 | t3m_00525 | pfam00306      | ATP-synt_ab_C                                                      | 6.00E-14 |
| 2572232169 | t3m_00525 | pfam02874      | ATP-synt_ab_N                                                      | 6.20E-08 |

|            |           |                |                                                             |          |
|------------|-----------|----------------|-------------------------------------------------------------|----------|
| 2572232169 | t3m_00525 | pfam00006      | ATP-synt_ab                                                 | 1.70E-59 |
| 2572232169 | t3m_00525 | EC:3.6.3.14    | H(+)-transporting two-sector ATPase.                        |          |
| 2572232169 | t3m_00525 | TIGR01041      | ATP synthase archaeal, B subunit                            | 0.00E+00 |
| 2572232169 | t3m_00525 | KO:K02118      | V-type H+-transporting ATPase subunit B [EC:3.6.3.14]       | 0.00E+00 |
| 2572232169 | t3m_00525 | Locus_type     | CDS                                                         |          |
| 2572232169 | t3m_00525 | Product_name   | Archaeal/vacuolar-type H+-ATPase subunit B                  |          |
| 2572232169 | t3m_00525 | Scaffold       | t3m_contig_70_62_len_47528_read_count_3866024.8             |          |
| 2572232169 | t3m_00525 | Coordinates    | 2116..3546(-)                                               |          |
| 2572232169 | t3m_00525 | DNA_length     | 1431bp                                                      |          |
| 2572232169 | t3m_00525 | Protein_length | 476aa                                                       |          |
| 2572232169 | t3m_00525 | GC             |                                                             | 0.68     |
| 2572232170 | t3m_00526 | KEGG_module    | M00159: V-type ATPase, prokaryotes                          |          |
| 2572232170 | t3m_00526 | Metacyc        | PWY-6126: adenosine nucleotides <i>de novo</i> biosynthesis |          |
| 2572232170 | t3m_00526 | COG_category   | [C] Energy production and conversion                        |          |
| 2572232170 | t3m_00526 | COG1155        | Archaeal/vacuolar-type H+-ATPase subunit A                  | 0.00E+00 |
| 2572232170 | t3m_00526 | pfam00006      | ATP-synt_ab                                                 | 1.00E-96 |
| 2572232170 | t3m_00526 | pfam00306      | ATP-synt_ab_C                                               | 1.20E-17 |
| 2572232170 | t3m_00526 | pfam02874      | ATP-synt_ab_N                                               | 9.50E-12 |
| 2572232170 | t3m_00526 | EC:3.6.3.14    | H(+)-transporting two-sector ATPase.                        |          |
| 2572232170 | t3m_00526 | KO:K02117      | V-type H+-transporting ATPase subunit A [EC:3.6.3.14]       | 0.00E+00 |
| 2572232170 | t3m_00526 | Locus_type     | CDS                                                         |          |
| 2572232170 | t3m_00526 | Product_name   | Archaeal/vacuolar-type H+-ATPase subunit A                  |          |
| 2572232170 | t3m_00526 | Scaffold       | t3m_contig_70_62_len_47528_read_count_3866024.8             |          |
| 2572232170 | t3m_00526 | Coordinates    | 3546..5309(-)                                               |          |
| 2572232170 | t3m_00526 | DNA_length     | 1764bp                                                      |          |
| 2572232170 | t3m_00526 | Protein_length | 587aa                                                       |          |
| 2572232170 | t3m_00526 | GC             |                                                             | 0.67     |
| 2572232171 | t3m_00527 | COG_category   | [C] Energy production and conversion                        |          |
| 2572232171 | t3m_00527 | COG1436        | Archaeal/vacuolar-type H+-ATPase subunit F                  | 4.00E-08 |
| 2572232171 | t3m_00527 | pfam01990      | ATP-synt_F                                                  | 1.50E-11 |
| 2572232171 | t3m_00527 | Locus_type     | CDS                                                         |          |
| 2572232171 | t3m_00527 | Product_name   | Archaeal/vacuolar-type H+-ATPase subunit F                  |          |

|            |           |                |                                                                   |                                                 |          |
|------------|-----------|----------------|-------------------------------------------------------------------|-------------------------------------------------|----------|
| 2572232171 | t3m_00527 | Scaffold       |                                                                   | t3m_contig_70_62_len_47528_read_count_3866024.8 |          |
| 2572232171 | t3m_00527 | Coordinates    |                                                                   | 5323..5658(-)                                   |          |
| 2572232171 | t3m_00527 | DNA_length     |                                                                   | 336bp                                           |          |
| 2572232171 | t3m_00527 | Protein_length |                                                                   | 111aa                                           |          |
| 2572232171 | t3m_00527 | GC             |                                                                   |                                                 | 0.67     |
| 2572232172 | t3m_00528 | COG_category   | [S] Function unknown                                              |                                                 |          |
| 2572232172 | t3m_00528 | COG4430        | Uncharacterized protein conserved in bacteria                     |                                                 | 2.00E-13 |
| 2572232172 | t3m_00528 | pfam13376      | OmdA                                                              |                                                 | 1.10E-13 |
| 2572232172 | t3m_00528 | Locus_type     |                                                                   | CDS                                             |          |
| 2572232172 | t3m_00528 | Product_name   |                                                                   | Uncharacterized protein conserved in bacteria   |          |
| 2572232172 | t3m_00528 | Scaffold       |                                                                   | t3m_contig_70_62_len_47528_read_count_3866024.8 |          |
| 2572232172 | t3m_00528 | Coordinates    |                                                                   | 5687..6361(-)                                   |          |
| 2572232172 | t3m_00528 | DNA_length     |                                                                   | 675bp                                           |          |
| 2572232172 | t3m_00528 | Protein_length |                                                                   | 224aa                                           |          |
| 2572232172 | t3m_00528 | GC             |                                                                   |                                                 | 0.7      |
| 2572232173 | t3m_00529 | pfam13187      | Fer4_9                                                            |                                                 | 7.70E-09 |
| 2572232173 | t3m_00529 | Locus_type     |                                                                   | CDS                                             |          |
| 2572232173 | t3m_00529 | Product_name   |                                                                   | 4Fe-4S dicluster domain                         |          |
| 2572232173 | t3m_00529 | Scaffold       |                                                                   | t3m_contig_70_62_len_47528_read_count_3866024.8 |          |
| 2572232173 | t3m_00529 | Coordinates    |                                                                   | 6373..6651(-)                                   |          |
| 2572232173 | t3m_00529 | DNA_length     |                                                                   | 279bp                                           |          |
| 2572232173 | t3m_00529 | Protein_length |                                                                   | 92aa                                            |          |
| 2572232173 | t3m_00529 | GC             |                                                                   |                                                 | 0.62     |
| 2572232174 | t3m_00530 | KEGG_module    | M00360: Aminoacyl-tRNA biosynthesis, prokaryotes                  |                                                 |          |
| 2572232174 | t3m_00530 | KEGG_module    | M00359: Aminoacyl-tRNA biosynthesis, eukaryotes                   |                                                 |          |
| 2572232174 | t3m_00530 | Metacyc        | PWY-6281: selenocysteine biosynthesis II (archaea and eukaryotes) |                                                 |          |
| 2572232174 | t3m_00530 | Metacyc        | PWY0-901: selenocysteine biosynthesis I (bacteria)                |                                                 |          |
| 2572232174 | t3m_00530 | Metacyc        | TRNA-CHARGING-PWY: tRNA charging                                  |                                                 |          |
| 2572232174 | t3m_00530 | IMG_pathway    | 352: Bacterial selenocysteine synthesis                           |                                                 |          |
| 2572232174 | t3m_00530 | IMG_pathway    | 467: Archaeal/eukaryotic selenocysteine synthesis                 |                                                 |          |
| 2572232174 | t3m_00530 | IMG_pathway    | 503: L-serine ligation to tRNA(Ser)                               |                                                 |          |

|            |           |                |                                                     |           |
|------------|-----------|----------------|-----------------------------------------------------|-----------|
| 2572232174 | t3m_00530 | COG_category   | [J] Translation, ribosomal structure and biogenesis |           |
| 2572232174 | t3m_00530 | COG0172        | Seryl-tRNA synthetase                               | 4.00E-130 |
| 2572232174 | t3m_00530 | pfam00587      | tRNA-synt_2b                                        | 9.50E-36  |
| 2572232174 | t3m_00530 | pfam02403      | Seryl_tRNA_N                                        | 3.00E-13  |
| 2572232174 | t3m_00530 | EC:6.1.1.11    | Serine--tRNA ligase.                                |           |
| 2572232174 | t3m_00530 | TIGR00414      | seryl-tRNA synthetase                               | 0.00E+00  |
| 2572232174 | t3m_00530 | KO:K01875      | seryl-tRNA synthetase [EC:6.1.1.11]                 | 0.00E+00  |
| 2572232174 | t3m_00530 | ITERM:00388    | seryl-tRNA synthetase (EC 6.1.1.11)                 |           |
| 2572232174 | t3m_00530 | Locus_type     | CDS                                                 |           |
| 2572232174 | t3m_00530 | Product_name   | seryl-tRNA synthetase (EC 6.1.1.11)                 |           |
| 2572232174 | t3m_00530 | Scaffold       | t3m_contig_70_62_len_47528_read_count_3866024.8     |           |
| 2572232174 | t3m_00530 | Coordinates    | 6688..8082(-)                                       |           |
| 2572232174 | t3m_00530 | DNA_length     | 1395bp                                              |           |
| 2572232174 | t3m_00530 | Protein_length | 464aa                                               |           |
| 2572232174 | t3m_00530 | GC             |                                                     | 0.7       |
| 2572232175 | t3m_00531 | COG_category   | [S] Function unknown                                |           |
| 2572232175 | t3m_00531 | COG1801        | Uncharacterized conserved protein                   | 3.00E-47  |
| 2572232175 | t3m_00531 | pfam01904      | DUF72                                               | 2.90E-66  |
| 2572232175 | t3m_00531 | Locus_type     | CDS                                                 |           |
| 2572232175 | t3m_00531 | Product_name   | Uncharacterized conserved protein                   |           |
| 2572232175 | t3m_00531 | Scaffold       | t3m_contig_70_62_len_47528_read_count_3866024.8     |           |
| 2572232175 | t3m_00531 | Coordinates    | 8181..8948(+)                                       |           |
| 2572232175 | t3m_00531 | DNA_length     | 768bp                                               |           |
| 2572232175 | t3m_00531 | Protein_length | 255aa                                               |           |
| 2572232175 | t3m_00531 | GC             |                                                     | 0.68      |
| 2572232176 | t3m_00532 | Locus_type     | CDS                                                 |           |
| 2572232176 | t3m_00532 | Product_name   | hypothetical protein                                |           |
| 2572232176 | t3m_00532 | Scaffold       | t3m_contig_70_62_len_47528_read_count_3866024.8     |           |
| 2572232176 | t3m_00532 | Coordinates    | 8961..9797(-)                                       |           |
| 2572232176 | t3m_00532 | DNA_length     | 837bp                                               |           |
| 2572232176 | t3m_00532 | Protein_length | 278aa                                               |           |
| 2572232176 | t3m_00532 | GC             |                                                     | 0.68      |

|            |           |                |                                              |                                                 |          |
|------------|-----------|----------------|----------------------------------------------|-------------------------------------------------|----------|
| 2572232176 | t3m_00532 | Transmembrane  |                                              | Yes                                             |          |
| 2572232177 | t3m_00533 | pfam08423      | Rad51                                        |                                                 | 2.80E-05 |
| 2572232177 | t3m_00533 | Locus_type     |                                              | CDS                                             |          |
| 2572232177 | t3m_00533 | Product_name   |                                              | Rad51                                           |          |
| 2572232177 | t3m_00533 | Scaffold       |                                              | t3m_contig_70_62_len_47528_read_count_3866024.8 |          |
| 2572232177 | t3m_00533 | Coordinates    |                                              | 10026..10922(+)                                 |          |
| 2572232177 | t3m_00533 | DNA_length     |                                              | 897bp                                           |          |
| 2572232177 | t3m_00533 | Protein_length |                                              | 298aa                                           |          |
| 2572232177 | t3m_00533 | GC             |                                              |                                                 | 0.72     |
| 2572232178 | t3m_00534 | Locus_type     |                                              | CDS                                             |          |
| 2572232178 | t3m_00534 | Product_name   |                                              | hypothetical protein                            |          |
| 2572232178 | t3m_00534 | Scaffold       |                                              | t3m_contig_70_62_len_47528_read_count_3866024.8 |          |
| 2572232178 | t3m_00534 | Coordinates    |                                              | 10919..11128(+)                                 |          |
| 2572232178 | t3m_00534 | DNA_length     |                                              | 210bp                                           |          |
| 2572232178 | t3m_00534 | Protein_length |                                              | 69aa                                            |          |
| 2572232178 | t3m_00534 | GC             |                                              |                                                 | 0.71     |
| 2572232179 | t3m_00535 | COG_category   | [L] Replication, recombination and repair    |                                                 |          |
| 2572232179 | t3m_00535 | COG0417        | DNA polymerase elongation subunit (family B) |                                                 | 4.00E-78 |
| 2572232179 | t3m_00535 | pfam00136      | DNA_pol_B                                    |                                                 | 4.50E-18 |
| 2572232179 | t3m_00535 | pfam03104      | DNA_pol_B_exo1                               |                                                 | 2.30E-05 |
| 2572232179 | t3m_00535 | EC:2.7.7.7     | DNA-directed DNA polymerase.                 |                                                 |          |
| 2572232179 | t3m_00535 | KO:K02319      | DNA polymerase I [EC:2.7.7.7]                |                                                 | 0.00E+00 |
| 2572232179 | t3m_00535 | Locus_type     |                                              | CDS                                             |          |
| 2572232179 | t3m_00535 | Product_name   |                                              | DNA polymerase elongation subunit (family B)    |          |
| 2572232179 | t3m_00535 | Scaffold       |                                              | t3m_contig_70_62_len_47528_read_count_3866024.8 |          |
| 2572232179 | t3m_00535 | Coordinates    |                                              | 11131..13470(+)                                 |          |
| 2572232179 | t3m_00535 | DNA_length     |                                              | 2340bp                                          |          |
| 2572232179 | t3m_00535 | Protein_length |                                              | 779aa                                           |          |
| 2572232179 | t3m_00535 | GC             |                                              |                                                 | 0.71     |
| 2572232180 | t3m_00536 | COG_category   | [C] Energy production and conversion         |                                                 |          |

|            |           |                |                                                 |          |
|------------|-----------|----------------|-------------------------------------------------|----------|
| 2572232180 | t3m_00536 | COG1413        | FOG: HEAT repeat                                | 5.00E-22 |
| 2572232180 | t3m_00536 | pfam13646      | HEAT_2                                          | 9.50E-16 |
| 2572232180 | t3m_00536 | pfam13646      | HEAT_2                                          | 1.00E-13 |
| 2572232180 | t3m_00536 | pfam03130      | HEAT_PBS                                        | 2.60E-03 |
| 2572232180 | t3m_00536 | pfam02985      | HEAT                                            | 2.40E-04 |
| 2572232180 | t3m_00536 | Locus_type     | CDS                                             |          |
| 2572232180 | t3m_00536 | Product_name   | FOG: HEAT repeat                                |          |
| 2572232180 | t3m_00536 | Scaffold       | t3m_contig_70_62_len_47528_read_count_3866024.8 |          |
| 2572232180 | t3m_00536 | Coordinates    | 13493..14986(+)                                 |          |
| 2572232180 | t3m_00536 | DNA_length     | 1494bp                                          |          |
| 2572232180 | t3m_00536 | Protein_length | 497aa                                           |          |
| 2572232180 | t3m_00536 | GC             |                                                 | 0.74     |
| 2572232181 | t3m_00537 | COG_category   | [R] General function prediction only            |          |
| 2572232181 | t3m_00537 | COG0456        | Acetyltransferases                              | 4.00E-08 |
| 2572232181 | t3m_00537 | pfam00583      | Acetyltransf_1                                  | 9.70E-16 |
| 2572232181 | t3m_00537 | Locus_type     | CDS                                             |          |
| 2572232181 | t3m_00537 | Product_name   | Acetyltransferases                              |          |
| 2572232181 | t3m_00537 | Scaffold       | t3m_contig_70_62_len_47528_read_count_3866024.8 |          |
| 2572232181 | t3m_00537 | Coordinates    | 14983..15921(+)                                 |          |
| 2572232181 | t3m_00537 | DNA_length     | 939bp                                           |          |
| 2572232181 | t3m_00537 | Protein_length | 312aa                                           |          |
| 2572232181 | t3m_00537 | GC             |                                                 | 0.7      |
| 2572232182 | t3m_00538 | Locus_type     | CDS                                             |          |
| 2572232182 | t3m_00538 | Product_name   | hypothetical protein                            |          |
| 2572232182 | t3m_00538 | Scaffold       | t3m_contig_70_62_len_47528_read_count_3866024.8 |          |
| 2572232182 | t3m_00538 | Coordinates    | 15944..17206(+)                                 |          |
| 2572232182 | t3m_00538 | DNA_length     | 1263bp                                          |          |
| 2572232182 | t3m_00538 | Protein_length | 420aa                                           |          |
| 2572232182 | t3m_00538 | GC             |                                                 | 0.72     |
| 2572232183 | t3m_00539 | COG_category   | [E] Amino acid transport and metabolism         |          |
| 2572232183 | t3m_00539 | COG2309        | Leucyl aminopeptidase (aminopeptidase T)        | 3.00E-15 |



|            |           |                |                                                     |                                                 |          |
|------------|-----------|----------------|-----------------------------------------------------|-------------------------------------------------|----------|
| 2572232183 | t3m_00539 | pfam02073      | Peptidase_M29                                       |                                                 | 7.40E-09 |
| 2572232183 | t3m_00539 | Locus_type     |                                                     | CDS                                             |          |
| 2572232183 | t3m_00539 | Product_name   |                                                     | Leucyl aminopeptidase (aminopeptidase T)        |          |
| 2572232183 | t3m_00539 | Scaffold       |                                                     | t3m_contig_70_62_len_47528_read_count_3866024.8 |          |
| 2572232183 | t3m_00539 | Coordinates    |                                                     | 17236..18345(+)                                 |          |
| 2572232183 | t3m_00539 | DNA_length     |                                                     | 1110bp                                          |          |
| 2572232183 | t3m_00539 | Protein_length |                                                     | 369aa                                           |          |
| 2572232183 | t3m_00539 | GC             |                                                     |                                                 | 0.73     |
|            |           |                |                                                     |                                                 |          |
| 2572232184 | t3m_00540 | COG_category   | [L] Replication, recombination and repair           |                                                 |          |
| 2572232184 | t3m_00540 | COG2094        | 3-methyladenine DNA glycosylase                     |                                                 | 2.00E-33 |
| 2572232184 | t3m_00540 | pfam02245      | Pur_DNA_glyco                                       |                                                 | 2.10E-43 |
| 2572232184 | t3m_00540 | EC:3.2.2.21    | DNA-3-methyladenine glycosylase II.                 |                                                 |          |
| 2572232184 | t3m_00540 | TIGR00567      | DNA-3-methyladenine glycosylase (3mg)               |                                                 | 1.50E-38 |
| 2572232184 | t3m_00540 | KO:K03652      | DNA-3-methyladenine glycosylase [EC:3.2.2.21]       |                                                 | 6.10E-27 |
| 2572232184 | t3m_00540 | Locus_type     |                                                     | CDS                                             |          |
| 2572232184 | t3m_00540 | Product_name   |                                                     | DNA-3-methyladenine glycosylase (3mg)           |          |
| 2572232184 | t3m_00540 | Scaffold       |                                                     | t3m_contig_70_62_len_47528_read_count_3866024.8 |          |
| 2572232184 | t3m_00540 | Coordinates    |                                                     | 18305..18901(+)                                 |          |
| 2572232184 | t3m_00540 | DNA_length     |                                                     | 597bp                                           |          |
| 2572232184 | t3m_00540 | Protein_length |                                                     | 198aa                                           |          |
| 2572232184 | t3m_00540 | GC             |                                                     |                                                 | 0.73     |
|            |           |                |                                                     |                                                 |          |
| 2572232185 | t3m_00541 | KEGG_module    | M00179: Ribosome, archaea                           |                                                 |          |
| 2572232185 | t3m_00541 | KEGG_module    | M00177: Ribosome, eukaryotes                        |                                                 |          |
| 2572232185 | t3m_00541 | COG_category   | [J] Translation, ribosomal structure and biogenesis |                                                 |          |
| 2572232185 | t3m_00541 | COG2126        | Ribosomal protein L37E                              |                                                 | 8.00E-07 |
| 2572232185 | t3m_00541 | pfam01907      | Ribosomal_L37e                                      |                                                 | 9.00E-20 |
| 2572232185 | t3m_00541 | KO:K02922      | large subunit ribosomal protein L37e                |                                                 | 1.20E-12 |
| 2572232185 | t3m_00541 | Locus_type     |                                                     | CDS                                             |          |
| 2572232185 | t3m_00541 | Product_name   |                                                     | LSU ribosomal protein L37E                      |          |
| 2572232185 | t3m_00541 | Scaffold       |                                                     | t3m_contig_70_62_len_47528_read_count_3866024.8 |          |
| 2572232185 | t3m_00541 | Coordinates    |                                                     | 18894..19055(-)                                 |          |
| 2572232185 | t3m_00541 | DNA_length     |                                                     | 162bp                                           |          |

|            |           |                |                                                   |  |          |
|------------|-----------|----------------|---------------------------------------------------|--|----------|
| 2572232185 | t3m_00541 | Protein_length | 53aa                                              |  |          |
| 2572232185 | t3m_00541 | GC             |                                                   |  | 0.62     |
| 2572232186 | t3m_00542 | COG_category   | [K] Transcription                                 |  |          |
| 2572232186 | t3m_00542 | COG1958        | Small nuclear ribonucleoprotein (snRNP) homolog   |  | 9.00E-15 |
| 2572232186 | t3m_00542 | pfam01423      | LSM                                               |  | 1.80E-21 |
| 2572232186 | t3m_00542 | KO:K04796      | small nuclear ribonucleoprotein                   |  | 1.90E-16 |
| 2572232186 | t3m_00542 | Locus_type     | CDS                                               |  |          |
| 2572232186 | t3m_00542 | Product_name   | Small nuclear ribonucleoprotein, LSM family       |  |          |
| 2572232186 | t3m_00542 | Scaffold       | t3m_contig_70_62_len_47528_read_count_3866024.8   |  |          |
| 2572232186 | t3m_00542 | Coordinates    | 19067..19279(-)                                   |  |          |
| 2572232186 | t3m_00542 | DNA_length     | 213bp                                             |  |          |
| 2572232186 | t3m_00542 | Protein_length | 70aa                                              |  |          |
| 2572232186 | t3m_00542 | GC             |                                                   |  | 0.64     |
| 2572232187 | t3m_00543 | COG_category   | [F] Nucleotide transport and metabolism           |  |          |
| 2572232187 | t3m_00543 | COG1428        | Deoxynucleoside kinases                           |  | 1.00E-06 |
| 2572232187 | t3m_00543 | Locus_type     | CDS                                               |  |          |
| 2572232187 | t3m_00543 | Product_name   | Deoxynucleoside kinases                           |  |          |
| 2572232187 | t3m_00543 | Scaffold       | t3m_contig_70_62_len_47528_read_count_3866024.8   |  |          |
| 2572232187 | t3m_00543 | Coordinates    | 19312..20034(-)                                   |  |          |
| 2572232187 | t3m_00543 | DNA_length     | 723bp                                             |  |          |
| 2572232187 | t3m_00543 | Protein_length | 240aa                                             |  |          |
| 2572232187 | t3m_00543 | GC             |                                                   |  | 0.72     |
| 2572232188 | t3m_00544 | KEGG_module    | M00126: Tetrahydrofolate biosynthesis, GTP => THF |  |          |
| 2572232188 | t3m_00544 | Metacyc        | PWY-6614: tetrahydrofolate biosynthesis           |  |          |
| 2572232188 | t3m_00544 | COG_category   | [H] Coenzyme transport and metabolism             |  |          |
| 2572232188 | t3m_00544 | COG0294        | Dihydropteroate synthase and related enzymes      |  | 2.00E-63 |
| 2572232188 | t3m_00544 | pfam00809      | Pterin_bind                                       |  | 6.00E-69 |
| 2572232188 | t3m_00544 | EC:2.5.1.15    | Dihydropteroate synthase.                         |  |          |
| 2572232188 | t3m_00544 | TIGR01496      | dihydropteroate synthase                          |  | 1.40E-91 |
| 2572232188 | t3m_00544 | KO:K00796      | dihydropteroate synthase [EC:2.5.1.15]            |  | 0.00E+00 |
| 2572232188 | t3m_00544 | Locus_type     | CDS                                               |  |          |

|            |           |                |                                                                       |          |
|------------|-----------|----------------|-----------------------------------------------------------------------|----------|
| 2572232188 | t3m_00544 | Product_name   | dihydropteroate synthase                                              |          |
| 2572232188 | t3m_00544 | Scaffold       | t3m_contig_70_62_len_47528_read_count_3866024.8                       |          |
| 2572232188 | t3m_00544 | Coordinates    | 20188..21423(+)                                                       |          |
| 2572232188 | t3m_00544 | DNA_length     | 1236bp                                                                |          |
| 2572232188 | t3m_00544 | Protein_length | 411aa                                                                 |          |
| 2572232188 | t3m_00544 | GC             |                                                                       | 0.71     |
|            |           |                |                                                                       |          |
| 2572232189 | t3m_00545 | Locus_type     | CDS                                                                   |          |
| 2572232189 | t3m_00545 | Product_name   | hypothetical protein                                                  |          |
| 2572232189 | t3m_00545 | Scaffold       | t3m_contig_70_62_len_47528_read_count_3866024.8                       |          |
| 2572232189 | t3m_00545 | Coordinates    | 21470..21655(-)                                                       |          |
| 2572232189 | t3m_00545 | DNA_length     | 186bp                                                                 |          |
| 2572232189 | t3m_00545 | Protein_length | 61aa                                                                  |          |
| 2572232189 | t3m_00545 | GC             |                                                                       | 0.67     |
|            |           |                |                                                                       |          |
| 2572232190 | t3m_00546 | COG_category   | [L] Replication, recombination and repair                             |          |
| 2572232190 | t3m_00546 | COG0188        | Type IIA topoisomerase (DNA gyrase/topo II, topoisomerase IV), A subu | 0.00E+00 |
| 2572232190 | t3m_00546 | pfam03989      | DNA_gyraseA_C                                                         | 1.70E-09 |
| 2572232190 | t3m_00546 | pfam03989      | DNA_gyraseA_C                                                         | 5.60E-08 |
| 2572232190 | t3m_00546 | pfam03989      | DNA_gyraseA_C                                                         | 1.50E-06 |
| 2572232190 | t3m_00546 | pfam00521      | DNA_topoisolV                                                         | 0.00E+00 |
| 2572232190 | t3m_00546 | pfam03989      | DNA_gyraseA_C                                                         | 5.40E-06 |
| 2572232190 | t3m_00546 | pfam03989      | DNA_gyraseA_C                                                         | 3.20E-11 |
| 2572232190 | t3m_00546 | pfam03989      | DNA_gyraseA_C                                                         | 4.90E-10 |
| 2572232190 | t3m_00546 | EC:5.99.1.3    | DNA topoisomerase (ATP-hydrolyzing).                                  |          |
| 2572232190 | t3m_00546 | TIGR01063      | DNA gyrase, A subunit                                                 | 0.00E+00 |
| 2572232190 | t3m_00546 | KO:K02469      | DNA gyrase subunit A [EC:5.99.1.3]                                    | 0.00E+00 |
| 2572232190 | t3m_00546 | Locus_type     | CDS                                                                   |          |
| 2572232190 | t3m_00546 | Product_name   | DNA gyrase subunit A (EC 5.99.1.3)                                    |          |
| 2572232190 | t3m_00546 | Scaffold       | t3m_contig_70_62_len_47528_read_count_3866024.8                       |          |
| 2572232190 | t3m_00546 | Coordinates    | 21630..24275(-)                                                       |          |
| 2572232190 | t3m_00546 | DNA_length     | 2646bp                                                                |          |
| 2572232190 | t3m_00546 | Protein_length | 881aa                                                                 |          |
| 2572232190 | t3m_00546 | GC             |                                                                       | 0.68     |

|            |           |                |                                                     |          |
|------------|-----------|----------------|-----------------------------------------------------|----------|
| 2572232191 | t3m_00547 | COG_category   | [L] Replication, recombination and repair           |          |
| 2572232191 | t3m_00547 | COG0608        | Single-stranded DNA-specific exonuclease            | 9.00E-33 |
| 2572232191 | t3m_00547 | pfam02272      | DHHA1                                               | 5.30E-07 |
| 2572232191 | t3m_00547 | pfam01368      | DHH                                                 | 9.20E-07 |
| 2572232191 | t3m_00547 | KO:K07463      | archaea-specific RecJ-like exonuclease              | 0.00E+00 |
| 2572232191 | t3m_00547 | Locus_type     | CDS                                                 |          |
| 2572232191 | t3m_00547 | Product_name   | Single-stranded DNA-specific exonuclease            |          |
| 2572232191 | t3m_00547 | Scaffold       | t3m_contig_70_62_len_47528_read_count_3866024.8     |          |
| 2572232191 | t3m_00547 | Coordinates    | 24272..25669(-)                                     |          |
| 2572232191 | t3m_00547 | DNA_length     | 1398bp                                              |          |
| 2572232191 | t3m_00547 | Protein_length | 465aa                                               |          |
| 2572232191 | t3m_00547 | GC             |                                                     | 0.71     |
|            |           |                |                                                     |          |
| 2572232192 | t3m_00548 | KEGG_module    | M00179: Ribosome, archaea                           |          |
| 2572232192 | t3m_00548 | KEGG_module    | M00178: Ribosome, bacteria                          |          |
| 2572232192 | t3m_00548 | COG_category   | [J] Translation, ribosomal structure and biogenesis |          |
| 2572232192 | t3m_00548 | COG0184        | Ribosomal protein S15P/S13E                         | 1.00E-14 |
| 2572232192 | t3m_00548 | pfam08069      | Ribosomal_S13_N                                     | 1.00E-19 |
| 2572232192 | t3m_00548 | pfam00312      | Ribosomal_S15                                       | 1.50E-20 |
| 2572232192 | t3m_00548 | KO:K02956      | small subunit ribosomal protein S15                 | 4.40E-39 |
| 2572232192 | t3m_00548 | Locus_type     | CDS                                                 |          |
| 2572232192 | t3m_00548 | Product_name   | Ribosomal protein S15P/S13E                         |          |
| 2572232192 | t3m_00548 | Scaffold       | t3m_contig_70_62_len_47528_read_count_3866024.8     |          |
| 2572232192 | t3m_00548 | Coordinates    | 25669..26124(-)                                     |          |
| 2572232192 | t3m_00548 | DNA_length     | 456bp                                               |          |
| 2572232192 | t3m_00548 | Protein_length | 151aa                                               |          |
| 2572232192 | t3m_00548 | GC             |                                                     | 0.69     |
|            |           |                |                                                     |          |
| 2572232193 | t3m_00549 | Locus_type     | CDS                                                 |          |
| 2572232193 | t3m_00549 | Product_name   | hypothetical protein                                |          |
| 2572232193 | t3m_00549 | Scaffold       | t3m_contig_70_62_len_47528_read_count_3866024.8     |          |
| 2572232193 | t3m_00549 | Coordinates    | 26206..26550(-)                                     |          |
| 2572232193 | t3m_00549 | DNA_length     | 345bp                                               |          |

|            |           |                |                                                     |          |
|------------|-----------|----------------|-----------------------------------------------------|----------|
| 2572232193 | t3m_00549 | Protein_length | 114aa                                               |          |
| 2572232193 | t3m_00549 | GC             |                                                     | 0.67     |
| 2572232194 | t3m_00550 | Locus_type     | CDS                                                 |          |
| 2572232194 | t3m_00550 | Product_name   | hypothetical protein                                |          |
| 2572232194 | t3m_00550 | Scaffold       | t3m_contig_70_62_len_47528_read_count_3866024.8     |          |
| 2572232194 | t3m_00550 | Coordinates    | 26611..26949(-)                                     |          |
| 2572232194 | t3m_00550 | DNA_length     | 339bp                                               |          |
| 2572232194 | t3m_00550 | Protein_length | 112aa                                               |          |
| 2572232194 | t3m_00550 | GC             |                                                     | 0.69     |
| 2572232195 | t3m_00551 | Locus_type     | CDS                                                 |          |
| 2572232195 | t3m_00551 | Product_name   | hypothetical protein                                |          |
| 2572232195 | t3m_00551 | Scaffold       | t3m_contig_70_62_len_47528_read_count_3866024.8     |          |
| 2572232195 | t3m_00551 | Coordinates    | 27042..27350(+)                                     |          |
| 2572232195 | t3m_00551 | DNA_length     | 309bp                                               |          |
| 2572232195 | t3m_00551 | Protein_length | 102aa                                               |          |
| 2572232195 | t3m_00551 | GC             |                                                     | 0.67     |
| 2572232196 | t3m_00552 | KEGG_module    | M00360: Aminoacyl-tRNA biosynthesis, prokaryotes    |          |
| 2572232196 | t3m_00552 | KEGG_module    | M00359: Aminoacyl-tRNA biosynthesis, eukaryotes     |          |
| 2572232196 | t3m_00552 | Metacyc        | TRNA-CHARGING-PWY: tRNA charging                    |          |
| 2572232196 | t3m_00552 | IMG_pathway    | 506: L-tryptophan ligation to tRNA(Trp)             |          |
| 2572232196 | t3m_00552 | COG_category   | [J] Translation, ribosomal structure and biogenesis |          |
| 2572232196 | t3m_00552 | COG0180        | Tryptophanyl-tRNA synthetase                        | 9.00E-66 |
| 2572232196 | t3m_00552 | pfam00579      | tRNA-synt_1b                                        | 3.70E-22 |
| 2572232196 | t3m_00552 | EC:6.1.1.2     | Tryptophan--tRNA ligase.                            |          |
| 2572232196 | t3m_00552 | TIGR00233      | tryptophanyl-tRNA synthetase                        | 9.60E-71 |
| 2572232196 | t3m_00552 | KO:K01867      | tryptophanyl-tRNA synthetase [EC:6.1.1.2]           | 0.00E+00 |
| 2572232196 | t3m_00552 | ITERM:00401    | tryptophanyl-tRNA synthetase (EC 6.1.1.2)           |          |
| 2572232196 | t3m_00552 | Locus_type     | CDS                                                 |          |
| 2572232196 | t3m_00552 | Product_name   | tryptophanyl-tRNA synthetase (EC 6.1.1.2)           |          |
| 2572232196 | t3m_00552 | Scaffold       | t3m_contig_70_62_len_47528_read_count_3866024.8     |          |
| 2572232196 | t3m_00552 | Coordinates    | 27362..28510(+)                                     |          |

|            |           |                |                       |                                                 |          |
|------------|-----------|----------------|-----------------------|-------------------------------------------------|----------|
| 2572232196 | t3m_00552 | DNA_length     |                       | 1149bp                                          |          |
| 2572232196 | t3m_00552 | Protein_length |                       | 382aa                                           |          |
| 2572232196 | t3m_00552 | GC             |                       |                                                 | 0.69     |
| 2572232197 | t3m_00553 | pfam13414      | TPR_11                |                                                 | 3.00E-07 |
| 2572232197 | t3m_00553 | pfam13414      | TPR_11                |                                                 | 5.00E-09 |
| 2572232197 | t3m_00553 | pfam00515      | TPR_1                 |                                                 | 5.80E-06 |
| 2572232197 | t3m_00553 | Locus_type     |                       | CDS                                             |          |
| 2572232197 | t3m_00553 | Product_name   |                       | Tetratricopeptide repeat/TPR repeat             |          |
| 2572232197 | t3m_00553 | Scaffold       |                       | t3m_contig_70_62_len_47528_read_count_3866024.8 |          |
| 2572232197 | t3m_00553 | Coordinates    |                       | 28536..29312(-)                                 |          |
| 2572232197 | t3m_00553 | DNA_length     |                       | 777bp                                           |          |
| 2572232197 | t3m_00553 | Protein_length |                       | 258aa                                           |          |
| 2572232197 | t3m_00553 | GC             |                       |                                                 | 0.72     |
| 2572232198 | t3m_00554 | KEGG_module    | M00288: RPA complex   |                                                 |          |
| 2572232198 | t3m_00554 | KO:K07466      | replication factor A1 |                                                 | 3.30E-35 |
| 2572232198 | t3m_00554 | Locus_type     |                       | CDS                                             |          |
| 2572232198 | t3m_00554 | Product_name   |                       | hypothetical protein                            |          |
| 2572232198 | t3m_00554 | Scaffold       |                       | t3m_contig_70_62_len_47528_read_count_3866024.8 |          |
| 2572232198 | t3m_00554 | Coordinates    |                       | 29603..30109(+)                                 |          |
| 2572232198 | t3m_00554 | DNA_length     |                       | 507bp                                           |          |
| 2572232198 | t3m_00554 | Protein_length |                       | 168aa                                           |          |
| 2572232198 | t3m_00554 | GC             |                       |                                                 | 0.65     |
| 2572232199 | t3m_00555 | pfam01037      | AsnC_trans_reg        |                                                 | 7.70E-09 |
| 2572232199 | t3m_00555 | Locus_type     |                       | CDS                                             |          |
| 2572232199 | t3m_00555 | Product_name   |                       | AsnC family                                     |          |
| 2572232199 | t3m_00555 | Scaffold       |                       | t3m_contig_70_62_len_47528_read_count_3866024.8 |          |
| 2572232199 | t3m_00555 | Coordinates    |                       | 30221..30892(+)                                 |          |
| 2572232199 | t3m_00555 | DNA_length     |                       | 672bp                                           |          |
| 2572232199 | t3m_00555 | Protein_length |                       | 223aa                                           |          |
| 2572232199 | t3m_00555 | GC             |                       |                                                 | 0.66     |

|            |           |                |                                                                       |           |
|------------|-----------|----------------|-----------------------------------------------------------------------|-----------|
| 2572232200 | t3m_00556 | KEGG_module    | M00051: Uridine monophosphate biosynthesis, glutamine (+ PRPP) => UMP |           |
| 2572232200 | t3m_00556 | Metacyc        | PWY-5154: arginine biosynthesis III                                   |           |
| 2572232200 | t3m_00556 | Metacyc        | ARGSYNBSUB-PWY: arginine biosynthesis II (acetyl cycle)               |           |
| 2572232200 | t3m_00556 | Metacyc        | ARGSYN-PWY: arginine biosynthesis I                                   |           |
| 2572232200 | t3m_00556 | Metacyc        | PWY-5686: UMP biosynthesis                                            |           |
| 2572232200 | t3m_00556 | COG_category   | [F] Nucleotide transport and metabolism                               |           |
| 2572232200 | t3m_00556 | COG_category   | [E] Amino acid transport and metabolism                               |           |
| 2572232200 | t3m_00556 | COG0458        | Carbamoylphosphate synthase large subunit (split gene in MJ)          | 3.00E-130 |
| 2572232200 | t3m_00556 | pfam00289      | CPSase_L_chain                                                        | 1.50E-11  |
| 2572232200 | t3m_00556 | pfam02786      | CPSase_L_D2                                                           | 7.90E-72  |
| 2572232200 | t3m_00556 | pfam02787      | CPSase_L_D3                                                           | 3.30E-33  |
| 2572232200 | t3m_00556 | pfam02142      | MGS                                                                   | 3.40E-08  |
| 2572232200 | t3m_00556 | pfam00289      | CPSase_L_chain                                                        | 4.30E-10  |
| 2572232200 | t3m_00556 | pfam02786      | CPSase_L_D2                                                           | 5.50E-30  |
| 2572232200 | t3m_00556 | EC:6.3.5.5     | Carbamoyl-phosphate synthase (glutamine-hydrolyzing).                 |           |
| 2572232200 | t3m_00556 | TIGR01369      | carbamoyl-phosphate synthase, large subunit                           | 0.00E+00  |
| 2572232200 | t3m_00556 | KO:K01955      | carbamoyl-phosphate synthase large subunit [EC:6.3.5.5]               | 0.00E+00  |
| 2572232200 | t3m_00556 | Locus_type     | CDS                                                                   |           |
| 2572232200 | t3m_00556 | Product_name   | carbamoyl-phosphate synthase, large subunit                           |           |
| 2572232200 | t3m_00556 | Scaffold       | t3m_contig_70_62_len_47528_read_count_3866024.8                       |           |
| 2572232200 | t3m_00556 | Coordinates    | 30855..34217(-)                                                       |           |
| 2572232200 | t3m_00556 | DNA_length     | 3363bp                                                                |           |
| 2572232200 | t3m_00556 | Protein_length | 1120aa                                                                |           |
| 2572232200 | t3m_00556 | GC             |                                                                       | 0.7       |
| 2572232201 | t3m_00557 | KEGG_module    | M00051: Uridine monophosphate biosynthesis, glutamine (+ PRPP) => UMP |           |
| 2572232201 | t3m_00557 | Metacyc        | PWY-5154: arginine biosynthesis III                                   |           |
| 2572232201 | t3m_00557 | Metacyc        | ARGSYN-PWY: arginine biosynthesis I                                   |           |
| 2572232201 | t3m_00557 | Metacyc        | ARGSYNBSUB-PWY: arginine biosynthesis II (acetyl cycle)               |           |
| 2572232201 | t3m_00557 | Metacyc        | PWY-5686: UMP biosynthesis                                            |           |
| 2572232201 | t3m_00557 | COG_category   | [F] Nucleotide transport and metabolism                               |           |
| 2572232201 | t3m_00557 | COG_category   | [E] Amino acid transport and metabolism                               |           |
| 2572232201 | t3m_00557 | COG0505        | Carbamoylphosphate synthase small subunit                             | 2.00E-103 |
| 2572232201 | t3m_00557 | pfam00988      | CPSase_sm_chain                                                       | 2.80E-47  |

|            |           |                |                                                                         |           |
|------------|-----------|----------------|-------------------------------------------------------------------------|-----------|
| 2572232201 | t3m_00557 | pfam00117      | GATase                                                                  | 1.20E-29  |
| 2572232201 | t3m_00557 | EC:6.3.5.5     | Carbamoyl-phosphate synthase (glutamine-hydrolyzing).                   |           |
| 2572232201 | t3m_00557 | TIGR01368      | carbamoyl-phosphate synthase, small subunit                             | 4.20E-112 |
| 2572232201 | t3m_00557 | KO:K01956      | carbamoyl-phosphate synthase small subunit [EC:6.3.5.5]                 | 0.00E+00  |
| 2572232201 | t3m_00557 | Locus_type     | CDS                                                                     |           |
| 2572232201 | t3m_00557 | Product_name   | carbamoyl-phosphate synthase, small subunit                             |           |
| 2572232201 | t3m_00557 | Scaffold       | t3m_contig_70_62_len_47528_read_count_3866024.8                         |           |
| 2572232201 | t3m_00557 | Coordinates    | 34214..35359(-)                                                         |           |
| 2572232201 | t3m_00557 | DNA_length     | 1146bp                                                                  |           |
| 2572232201 | t3m_00557 | Protein_length | 381aa                                                                   |           |
| 2572232201 | t3m_00557 | GC             |                                                                         | 0.71      |
| 2572232202 | t3m_00558 | Metacyc        | THIOREDOX-PWY: thioredoxin pathway                                      |           |
| 2572232202 | t3m_00558 | COG_category   | [O] Posttranslational modification, protein turnover, chaperones        |           |
| 2572232202 | t3m_00558 | COG0492        | Thioredoxin reductase                                                   | 1.00E-19  |
| 2572232202 | t3m_00558 | pfam07992      | Pyr_redox_2                                                             | 2.30E-11  |
| 2572232202 | t3m_00558 | EC:1.8.1.9     | Thioredoxin-disulfide reductase.                                        |           |
| 2572232202 | t3m_00558 | KO:K00384      | thioredoxin reductase (NADPH) [EC:1.8.1.9]                              | 1.80E-29  |
| 2572232202 | t3m_00558 | Locus_type     | CDS                                                                     |           |
| 2572232202 | t3m_00558 | Product_name   | Thioredoxin reductase                                                   |           |
| 2572232202 | t3m_00558 | Scaffold       | t3m_contig_70_62_len_47528_read_count_3866024.8                         |           |
| 2572232202 | t3m_00558 | Coordinates    | 35491..36486(+)                                                         |           |
| 2572232202 | t3m_00558 | DNA_length     | 996bp                                                                   |           |
| 2572232202 | t3m_00558 | Protein_length | 331aa                                                                   |           |
| 2572232202 | t3m_00558 | GC             |                                                                         | 0.68      |
| 2572232203 | t3m_00559 | KEGG_module    | M00532: Photorespiration                                                |           |
| 2572232203 | t3m_00559 | Metacyc        | PWY-181: photorespiration                                               |           |
| 2572232203 | t3m_00559 | COG_category   | [R] General function prediction only                                    |           |
| 2572232203 | t3m_00559 | COG0546        | Predicted phosphatases                                                  | 9.00E-22  |
| 2572232203 | t3m_00559 | pfam13419      | HAD_2                                                                   | 4.70E-20  |
| 2572232203 | t3m_00559 | EC:3.1.3.18    | Phosphoglycolate phosphatase.                                           |           |
| 2572232203 | t3m_00559 | TIGR01549      | haloacid dehalogenase superfamily, subfamily IA, variant 1 with third m | 2.90E-13  |
| 2572232203 | t3m_00559 | KO:K01091      | phosphoglycolate phosphatase [EC:3.1.3.18]                              | 3.20E-14  |



|            |           |                |                                   |                                                                          |          |
|------------|-----------|----------------|-----------------------------------|--------------------------------------------------------------------------|----------|
| 2572232203 | t3m_00559 | Locus_type     |                                   | CDS                                                                      |          |
| 2572232203 | t3m_00559 | Product_name   |                                   | haloacid dehalogenase superfamily, subfamily IA, variant 1 with third mc |          |
| 2572232203 | t3m_00559 | Scaffold       |                                   | t3m_contig_70_62_len_47528_read_count_3866024.8                          |          |
| 2572232203 | t3m_00559 | Coordinates    |                                   | 36493..37242(-)                                                          |          |
| 2572232203 | t3m_00559 | DNA_length     |                                   | 750bp                                                                    |          |
| 2572232203 | t3m_00559 | Protein_length |                                   | 249aa                                                                    |          |
| 2572232203 | t3m_00559 | GC             |                                   |                                                                          | 0.68     |
|            |           |                |                                   |                                                                          |          |
| 2572232204 | t3m_00560 | Locus_type     |                                   | CDS                                                                      |          |
| 2572232204 | t3m_00560 | Product_name   |                                   | hypothetical protein                                                     |          |
| 2572232204 | t3m_00560 | Scaffold       |                                   | t3m_contig_70_62_len_47528_read_count_3866024.8                          |          |
| 2572232204 | t3m_00560 | Coordinates    |                                   | 37323..37628(-)                                                          |          |
| 2572232204 | t3m_00560 | DNA_length     |                                   | 306bp                                                                    |          |
| 2572232204 | t3m_00560 | Protein_length |                                   | 101aa                                                                    |          |
| 2572232204 | t3m_00560 | GC             |                                   |                                                                          | 0.66     |
|            |           |                |                                   |                                                                          |          |
| 2572232205 | t3m_00561 | pfam13659      | Methyltransf_26                   |                                                                          | 4.80E-09 |
| 2572232205 | t3m_00561 | Locus_type     |                                   | CDS                                                                      |          |
| 2572232205 | t3m_00561 | Product_name   |                                   | Methyltransferase domain                                                 |          |
| 2572232205 | t3m_00561 | Scaffold       |                                   | t3m_contig_70_62_len_47528_read_count_3866024.8                          |          |
| 2572232205 | t3m_00561 | Coordinates    |                                   | 37654..39168(-)                                                          |          |
| 2572232205 | t3m_00561 | DNA_length     |                                   | 1515bp                                                                   |          |
| 2572232205 | t3m_00561 | Protein_length |                                   | 504aa                                                                    |          |
| 2572232205 | t3m_00561 | GC             |                                   |                                                                          | 0.71     |
|            |           |                |                                   |                                                                          |          |
| 2572232206 | t3m_00562 | COG_category   | [S] Function unknown              |                                                                          |          |
| 2572232206 | t3m_00562 | COG5607        | Uncharacterized conserved protein |                                                                          | 1.00E-08 |
| 2572232206 | t3m_00562 | pfam05235      | CHAD                              |                                                                          | 7.40E-20 |
| 2572232206 | t3m_00562 | Locus_type     |                                   | CDS                                                                      |          |
| 2572232206 | t3m_00562 | Product_name   |                                   | Uncharacterized conserved protein                                        |          |
| 2572232206 | t3m_00562 | Scaffold       |                                   | t3m_contig_70_62_len_47528_read_count_3866024.8                          |          |
| 2572232206 | t3m_00562 | Coordinates    |                                   | 39213..40100(-)                                                          |          |
| 2572232206 | t3m_00562 | DNA_length     |                                   | 888bp                                                                    |          |
| 2572232206 | t3m_00562 | Protein_length |                                   | 295aa                                                                    |          |

|            |           |                |                                                                                     |          |
|------------|-----------|----------------|-------------------------------------------------------------------------------------|----------|
| 2572232206 | t3m_00562 | GC             |                                                                                     | 0.7      |
| 2572232207 | t3m_00563 | Metacyc        | PPGPPMET-PWY: ppGpp biosynthesis                                                    |          |
| 2572232207 | t3m_00563 | COG_category   | [P] Inorganic ion transport and metabolism                                          |          |
| 2572232207 | t3m_00563 | COG_category   | [F] Nucleotide transport and metabolism                                             |          |
| 2572232207 | t3m_00563 | COG0248        | Exopolyphosphatase                                                                  | 1.00E-76 |
| 2572232207 | t3m_00563 | pfam02541      | Ppx-GppA                                                                            | 7.40E-55 |
| 2572232207 | t3m_00563 | EC:3.6.1.11    | Exopolyphosphatase.                                                                 |          |
| 2572232207 | t3m_00563 | EC:3.6.1.40    | Guanosine-5'-triphosphate,3'-diphosphate diphosphatase.                             |          |
| 2572232207 | t3m_00563 | TIGR03706      | exopolyphosphatase                                                                  | 7.20E-85 |
| 2572232207 | t3m_00563 | KO:K01524      | exopolyphosphatase / guanosine-5'-triphosphate,3'-diphosphate pyrop                 | 0.00E+00 |
| 2572232207 | t3m_00563 | Locus_type     | CDS                                                                                 |          |
| 2572232207 | t3m_00563 | Product_name   | Exopolyphosphatase                                                                  |          |
| 2572232207 | t3m_00563 | Scaffold       | t3m_contig_70_62_len_47528_read_count_3866024.8                                     |          |
| 2572232207 | t3m_00563 | Coordinates    | 40213..41772(+)                                                                     |          |
| 2572232207 | t3m_00563 | DNA_length     | 1560bp                                                                              |          |
| 2572232207 | t3m_00563 | Protein_length | 519aa                                                                               |          |
| 2572232207 | t3m_00563 | GC             |                                                                                     | 0.68     |
| 2572232208 | t3m_00564 | KEGG_module    | M00053: Pyrimidine deoxyribonucleotide biosynthesis, CDP/CTP => dCDP/dCTP,dTDP/dTTP |          |
| 2572232208 | t3m_00564 | COG_category   | [F] Nucleotide transport and metabolism                                             |          |
| 2572232208 | t3m_00564 | COG0125        | Thymidylate kinase                                                                  | 6.00E-36 |
| 2572232208 | t3m_00564 | pfam02223      | Thymidylate_kin                                                                     | 3.50E-28 |
| 2572232208 | t3m_00564 | EC:2.7.4.9     | dTMP kinase.                                                                        |          |
| 2572232208 | t3m_00564 | TIGR00041      | thymidylate kinase                                                                  | 7.60E-32 |
| 2572232208 | t3m_00564 | KO:K00943      | dTMP kinase [EC:2.7.4.9]                                                            | 0.00E+00 |
| 2572232208 | t3m_00564 | Locus_type     | CDS                                                                                 |          |
| 2572232208 | t3m_00564 | Product_name   | thymidylate kinase                                                                  |          |
| 2572232208 | t3m_00564 | Scaffold       | t3m_contig_70_62_len_47528_read_count_3866024.8                                     |          |
| 2572232208 | t3m_00564 | Coordinates    | 41765..42463(+)                                                                     |          |
| 2572232208 | t3m_00564 | DNA_length     | 699bp                                                                               |          |
| 2572232208 | t3m_00564 | Protein_length | 232aa                                                                               |          |
| 2572232208 | t3m_00564 | GC             |                                                                                     | 0.64     |

|            |           |                |                                                                          |          |
|------------|-----------|----------------|--------------------------------------------------------------------------|----------|
| 2572232209 | t3m_00565 | IMG_pathway    | 331: dTDP synthesis                                                      |          |
| 2572232209 | t3m_00565 | COG_category   | [F] Nucleotide transport and metabolism                                  |          |
| 2572232209 | t3m_00565 | COG0125        | Thymidylate kinase                                                       | 3.00E-28 |
| 2572232209 | t3m_00565 | pfam02223      | Thymidylate_kin                                                          | 8.00E-20 |
| 2572232209 | t3m_00565 | TIGR00041      | thymidylate kinase                                                       | 9.50E-27 |
| 2572232209 | t3m_00565 | ITERM:01406    | thymidylate kinase (EC 2.7.4.9)                                          |          |
| 2572232209 | t3m_00565 | Locus_type     | CDS                                                                      |          |
| 2572232209 | t3m_00565 | Product_name   | thymidylate kinase (EC 2.7.4.9)                                          |          |
| 2572232209 | t3m_00565 | Scaffold       | t3m_contig_70_62_len_47528_read_count_3866024.8                          |          |
| 2572232209 | t3m_00565 | Coordinates    | 42453..43217(+)                                                          |          |
| 2572232209 | t3m_00565 | DNA_length     | 765bp                                                                    |          |
| 2572232209 | t3m_00565 | Protein_length | 254aa                                                                    |          |
| 2572232209 | t3m_00565 | GC             |                                                                          | 0.68     |
|            |           |                |                                                                          |          |
| 2572232210 | t3m_00566 | Metacyc        | PWY-6366: D-<i>myo</i>-inositol (1,4,5,6)-tetrakisphosphate biosynthesis |          |
| 2572232210 | t3m_00566 | Metacyc        | NADPHOS-DEPHOS-PWY: NAD phosphorylation and dephosphorylation            |          |
| 2572232210 | t3m_00566 | Metacyc        | PWY-6365: D-<i>myo</i>-inositol (3,4,5,6)-tetrakisphosphate biosynthesis |          |
| 2572232210 | t3m_00566 | Metacyc        | PWY-6724: starch degradation II                                          |          |
| 2572232210 | t3m_00566 | Metacyc        | PWY-6456: serinol biosynthesis                                           |          |
| 2572232210 | t3m_00566 | Metacyc        | PWY-6367: D-<i>myo</i>-inositol-5-phosphate metabolism                   |          |
| 2572232210 | t3m_00566 | Metacyc        | PWY-6991: (-)-camphor biosynthesis                                       |          |
| 2572232210 | t3m_00566 | Metacyc        | PWY-6352: 3-phosphoinositide biosynthesis                                |          |
| 2572232210 | t3m_00566 | Metacyc        | NAD-BIOSYNTHESIS-II: NAD salvage pathway II                              |          |
| 2572232210 | t3m_00566 | Metacyc        | PWY-6575: juvenile hormone III biosynthesis I                            |          |
| 2572232210 | t3m_00566 | Metacyc        | PWY-882: L-ascorbate biosynthesis I (L-galactose pathway)                |          |
| 2572232210 | t3m_00566 | Metacyc        | PWY-6368: 3-phosphoinositide degradation                                 |          |
| 2572232210 | t3m_00566 | Metacyc        | PWY-6627: salinosporamide A biosynthesis                                 |          |
| 2572232210 | t3m_00566 | Metacyc        | PWY-5491: diethylphosphate degradation                                   |          |
| 2572232210 | t3m_00566 | Metacyc        | PWY-6990: (+)-camphor biosynthesis                                       |          |
| 2572232210 | t3m_00566 | Metacyc        | PWY-6686: mannosylglucosylglycerate biosynthesis I                       |          |
| 2572232210 | t3m_00566 | Metacyc        | PWY-7119: sphingolipid recycling and degradation (yeast)                 |          |
| 2572232210 | t3m_00566 | Metacyc        | PWY-7018: paromomycin biosynthesis                                       |          |
| 2572232210 | t3m_00566 | Metacyc        | PWY-6720: toyocamycin biosynthesis                                       |          |
| 2572232210 | t3m_00566 | Metacyc        | PWY-5083: NAD/NADH phosphorylation and dephosphorylation                 |          |

|            |           |                |                                                                     |          |
|------------|-----------|----------------|---------------------------------------------------------------------|----------|
| 2572232210 | t3m_00566 | COG_category   | [T] Signal transduction mechanisms                                  |          |
| 2572232210 | t3m_00566 | COG2062        | Phosphohistidine phosphatase SixA                                   | 3.00E-19 |
| 2572232210 | t3m_00566 | pfam00300      | His_Phos_1                                                          | 4.20E-09 |
| 2572232210 | t3m_00566 | EC:3.1.3.-     | Hydrolases. Acting on ester bonds. Phosphoric monoester hydrolases. |          |
| 2572232210 | t3m_00566 | TIGR00249      | phosphohistidine phosphatase SixA                                   | 1.80E-24 |
| 2572232210 | t3m_00566 | KO:K08296      | phosphohistidine phosphatase [EC:3.1.3.-]                           | 1.00E-17 |
| 2572232210 | t3m_00566 | ITERM:02457    | phosphohistidine phosphatase, SixA                                  |          |
| 2572232210 | t3m_00566 | Locus_type     | CDS                                                                 |          |
| 2572232210 | t3m_00566 | Product_name   | phosphohistidine phosphatase, SixA                                  |          |
| 2572232210 | t3m_00566 | Scaffold       | t3m_contig_70_62_len_47528_read_count_3866024.8                     |          |
| 2572232210 | t3m_00566 | Coordinates    | 43183..43719(-)                                                     |          |
| 2572232210 | t3m_00566 | DNA_length     | 537bp                                                               |          |
| 2572232210 | t3m_00566 | Protein_length | 178aa                                                               |          |
| 2572232210 | t3m_00566 | GC             |                                                                     | 0.71     |
| 2572232211 | t3m_00567 | COG_category   | [P] Inorganic ion transport and metabolism                          |          |
| 2572232211 | t3m_00567 | COG0704        | Phosphate uptake regulator                                          | 4.00E-05 |
| 2572232211 | t3m_00567 | Locus_type     | CDS                                                                 |          |
| 2572232211 | t3m_00567 | Product_name   | Phosphate uptake regulator                                          |          |
| 2572232211 | t3m_00567 | Scaffold       | t3m_contig_70_62_len_47528_read_count_3866024.8                     |          |
| 2572232211 | t3m_00567 | Coordinates    | 43773..44819(-)                                                     |          |
| 2572232211 | t3m_00567 | DNA_length     | 1047bp                                                              |          |
| 2572232211 | t3m_00567 | Protein_length | 348aa                                                               |          |
| 2572232211 | t3m_00567 | GC             |                                                                     | 0.69     |
| 2572232212 | t3m_00568 | Locus_type     | CDS                                                                 |          |
| 2572232212 | t3m_00568 | Product_name   | hypothetical protein                                                |          |
| 2572232212 | t3m_00568 | Scaffold       | t3m_contig_70_62_len_47528_read_count_3866024.8                     |          |
| 2572232212 | t3m_00568 | Coordinates    | 45029..45598(+)                                                     |          |
| 2572232212 | t3m_00568 | DNA_length     | 570bp                                                               |          |
| 2572232212 | t3m_00568 | Protein_length | 189aa                                                               |          |
| 2572232212 | t3m_00568 | GC             |                                                                     | 0.69     |
| 2572232213 | t3m_00569 | COG_category   | [R] General function prediction only                                |          |

|            |           |                |                                                 |          |
|------------|-----------|----------------|-------------------------------------------------|----------|
| 2572232213 | t3m_00569 | COG0456        | Acetyltransferases                              | 6.00E-09 |
| 2572232213 | t3m_00569 | pfam06906      | DUF1272                                         | 1.90E-12 |
| 2572232213 | t3m_00569 | pfam00583      | Acetyltransf_1                                  | 4.00E-16 |
| 2572232213 | t3m_00569 | Locus_type     | CDS                                             |          |
| 2572232213 | t3m_00569 | Product_name   | Acetyltransferases                              |          |
| 2572232213 | t3m_00569 | Scaffold       | t3m_contig_70_62_len_47528_read_count_3866024.8 |          |
| 2572232213 | t3m_00569 | Coordinates    | 45747..46418(+)                                 |          |
| 2572232213 | t3m_00569 | DNA_length     | 672bp                                           |          |
| 2572232213 | t3m_00569 | Protein_length | 223aa                                           |          |
| 2572232213 | t3m_00569 | GC             |                                                 | 0.67     |
| 2572232213 | t3m_00569 | Fused_gene     | Yes                                             |          |
| 2572232214 | t3m_00570 | COG_category   | [S] Function unknown                            |          |
| 2572232214 | t3m_00570 | COG3374        | Predicted membrane protein                      | 5.00E-25 |
| 2572232214 | t3m_00570 | pfam06168      | DUF981                                          | 7.40E-40 |
| 2572232214 | t3m_00570 | KO:K08980      | putative membrane protein                       | 2.10E-37 |
| 2572232214 | t3m_00570 | Locus_type     | CDS                                             |          |
| 2572232214 | t3m_00570 | Product_name   | Predicted membrane protein                      |          |
| 2572232214 | t3m_00570 | Scaffold       | t3m_contig_70_62_len_47528_read_count_3866024.8 |          |
| 2572232214 | t3m_00570 | Coordinates    | 46547..47227(-)                                 |          |
| 2572232214 | t3m_00570 | DNA_length     | 681bp                                           |          |
| 2572232214 | t3m_00570 | Protein_length | 226aa                                           |          |
| 2572232214 | t3m_00570 | GC             |                                                 | 0.61     |
| 2572232214 | t3m_00570 | Transmembrane  | Yes                                             |          |
| 2572232215 | t3m_00571 | Locus_type     | tRNA                                            |          |
| 2572232215 | t3m_00571 | Product_name   | tRNA_Val_TAC                                    |          |
| 2572232215 | t3m_00571 | Scaffold       | t3m_contig_70_62_len_47528_read_count_3866024.8 |          |
| 2572232215 | t3m_00571 | Coordinates    | 47382..47454(-)                                 |          |
| 2572232215 | t3m_00571 | DNA_length     | 73bp                                            |          |
| 2572232215 | t3m_00571 | GC             |                                                 | 0.64     |
| 2572232216 | t3m_00572 | Locus_type     | CDS                                             |          |
| 2572232216 | t3m_00572 | Product_name   | hypothetical protein                            |          |

|            |           |                |                                                                               |          |
|------------|-----------|----------------|-------------------------------------------------------------------------------|----------|
| 2572232216 | t3m_00572 | Scaffold       | t3m_contig_70_65_len_46776_read_count_3444312.9                               |          |
| 2572232216 | t3m_00572 | Coordinates    | 43..243(+)                                                                    |          |
| 2572232216 | t3m_00572 | DNA_length     | 201bp                                                                         |          |
| 2572232216 | t3m_00572 | Protein_length | 66aa                                                                          |          |
| 2572232216 | t3m_00572 | GC             |                                                                               | 0.69     |
|            |           |                |                                                                               |          |
| 2572232217 | t3m_00573 | Locus_type     | CDS                                                                           |          |
| 2572232217 | t3m_00573 | Product_name   | hypothetical protein                                                          |          |
| 2572232217 | t3m_00573 | Scaffold       | t3m_contig_70_65_len_46776_read_count_3444312.9                               |          |
| 2572232217 | t3m_00573 | Coordinates    | 309..509(-)                                                                   |          |
| 2572232217 | t3m_00573 | DNA_length     | 201bp                                                                         |          |
| 2572232217 | t3m_00573 | Protein_length | 66aa                                                                          |          |
| 2572232217 | t3m_00573 | GC             |                                                                               | 0.64     |
| 2572232217 | t3m_00573 | Transmembrane  | Yes                                                                           |          |
|            |           |                |                                                                               |          |
| 2572232218 | t3m_00574 | Locus_type     | CDS                                                                           |          |
| 2572232218 | t3m_00574 | Product_name   | hypothetical protein                                                          |          |
| 2572232218 | t3m_00574 | Scaffold       | t3m_contig_70_65_len_46776_read_count_3444312.9                               |          |
| 2572232218 | t3m_00574 | Coordinates    | 706..1086(-)                                                                  |          |
| 2572232218 | t3m_00574 | DNA_length     | 381bp                                                                         |          |
| 2572232218 | t3m_00574 | Protein_length | 126aa                                                                         |          |
| 2572232218 | t3m_00574 | GC             |                                                                               | 0.64     |
| 2572232218 | t3m_00574 | Transmembrane  | Yes                                                                           |          |
|            |           |                |                                                                               |          |
| 2572232219 | t3m_00575 | KEGG_module    | M00045: Histidine degradation, histidine => N-formiminoglutamate => glutamate |          |
| 2572232219 | t3m_00575 | Metacyc        | HISHP-PWY: histidine degradation VI                                           |          |
| 2572232219 | t3m_00575 | Metacyc        | PWY-5028: histidine degradation II                                            |          |
| 2572232219 | t3m_00575 | Metacyc        | PWY-5030: histidine degradation III                                           |          |
| 2572232219 | t3m_00575 | Metacyc        | HISDEG-PWY: histidine degradation I                                           |          |
| 2572232219 | t3m_00575 | IMG_pathway    | 189: L-histidine degradation to L-glutamate and formamide                     |          |
| 2572232219 | t3m_00575 | IMG_pathway    | 190: L-histidine degradation to L-glutamate and formiminotetrahydrofolate     |          |
| 2572232219 | t3m_00575 | COG_category   | [E] Amino acid transport and metabolism                                       |          |
| 2572232219 | t3m_00575 | COG2987        | Urocanate hydratase                                                           | 0.00E+00 |
| 2572232219 | t3m_00575 | pfam01175      | Urocanase                                                                     | 0.00E+00 |

|            |           |                |                                                 |          |
|------------|-----------|----------------|-------------------------------------------------|----------|
| 2572232219 | t3m_00575 | EC:4.2.1.49    | Urocanate hydratase.                            |          |
| 2572232219 | t3m_00575 | TIGR01228      | urocanate hydratase                             | 0.00E+00 |
| 2572232219 | t3m_00575 | KO:K01712      | urocanate hydratase [EC:4.2.1.49]               | 0.00E+00 |
| 2572232219 | t3m_00575 | ITERM:00501    | urocanate hydratase (EC 4.2.1.49)               |          |
| 2572232219 | t3m_00575 | Locus_type     | CDS                                             |          |
| 2572232219 | t3m_00575 | Product_name   | urocanate hydratase (EC 4.2.1.49)               |          |
| 2572232219 | t3m_00575 | Scaffold       | t3m_contig_70_65_len_46776_read_count_3444312.9 |          |
| 2572232219 | t3m_00575 | Coordinates    | 1342..3042(+)                                   |          |
| 2572232219 | t3m_00575 | DNA_length     | 1701bp                                          |          |
| 2572232219 | t3m_00575 | Protein_length | 566aa                                           |          |
| 2572232219 | t3m_00575 | GC             |                                                 | 0.68     |
| 2572232220 | t3m_00576 | COG_category   | [E] Amino acid transport and metabolism         |          |
| 2572232220 | t3m_00576 | COG2309        | Leucyl aminopeptidase (aminopeptidase T)        | 1.00E-18 |
| 2572232220 | t3m_00576 | pfam02073      | Peptidase_M29                                   | 9.10E-13 |
| 2572232220 | t3m_00576 | Locus_type     | CDS                                             |          |
| 2572232220 | t3m_00576 | Product_name   | Leucyl aminopeptidase (aminopeptidase T)        |          |
| 2572232220 | t3m_00576 | Scaffold       | t3m_contig_70_65_len_46776_read_count_3444312.9 |          |
| 2572232220 | t3m_00576 | Coordinates    | 3112..4173(+)                                   |          |
| 2572232220 | t3m_00576 | DNA_length     | 1062bp                                          |          |
| 2572232220 | t3m_00576 | Protein_length | 353aa                                           |          |
| 2572232220 | t3m_00576 | GC             |                                                 | 0.69     |
| 2572232221 | t3m_00577 | Locus_type     | CDS                                             |          |
| 2572232221 | t3m_00577 | Product_name   | hypothetical protein                            |          |
| 2572232221 | t3m_00577 | Scaffold       | t3m_contig_70_65_len_46776_read_count_3444312.9 |          |
| 2572232221 | t3m_00577 | Coordinates    | 4275..5720(+)                                   |          |
| 2572232221 | t3m_00577 | DNA_length     | 1446bp                                          |          |
| 2572232221 | t3m_00577 | Protein_length | 481aa                                           |          |
| 2572232221 | t3m_00577 | GC             |                                                 | 0.68     |
| 2572232221 | t3m_00577 | Transmembrane  | Yes                                             |          |
| 2572232222 | t3m_00578 | COG_category   | [F] Nucleotide transport and metabolism         |          |
| 2572232222 | t3m_00578 | COG1051        | ADP-ribose pyrophosphatase                      | 9.00E-08 |

|            |           |                |                                                                                       |                                                        |          |
|------------|-----------|----------------|---------------------------------------------------------------------------------------|--------------------------------------------------------|----------|
| 2572232222 | t3m_00578 | pfam00293      | NUDIX                                                                                 |                                                        | 4.60E-22 |
| 2572232222 | t3m_00578 | Locus_type     |                                                                                       | CDS                                                    |          |
| 2572232222 | t3m_00578 | Product_name   |                                                                                       | ADP-ribose pyrophosphatase                             |          |
| 2572232222 | t3m_00578 | Scaffold       |                                                                                       | t3m_contig_70_65_len_46776_read_count_3444312.9        |          |
| 2572232222 | t3m_00578 | Coordinates    |                                                                                       | 5797..6273(-)                                          |          |
| 2572232222 | t3m_00578 | DNA_length     |                                                                                       | 477bp                                                  |          |
| 2572232222 | t3m_00578 | Protein_length |                                                                                       | 158aa                                                  |          |
| 2572232222 | t3m_00578 | GC             |                                                                                       |                                                        | 0.67     |
| 2572232223 | t3m_00579 | Metacyc        | PWY-7064: 3-amino-3-phenylpropanoyl-CoA formation (Taxol 13C-side chain biosynthesis) |                                                        |          |
| 2572232223 | t3m_00579 | Metacyc        | PWY66-388: fatty acid &alpha;-oxidation III                                           |                                                        |          |
| 2572232223 | t3m_00579 | Metacyc        | PWY-6948: sitosterol degradation to androstenedione                                   |                                                        |          |
| 2572232223 | t3m_00579 | Metacyc        | PWY-735: jasmonic acid biosynthesis                                                   |                                                        |          |
| 2572232223 | t3m_00579 | Metacyc        | PWYG-321: mycolate biosynthesis                                                       |                                                        |          |
| 2572232223 | t3m_00579 | Metacyc        | PWY-6799: fatty acid biosynthesis (plant mitochondria)                                |                                                        |          |
| 2572232223 | t3m_00579 | Metacyc        | PWY-5789: 3-hydroxypropionate/4-hydroxybutyrate cycle                                 |                                                        |          |
| 2572232223 | t3m_00579 | Metacyc        | CARNMET-PWY: carnitine degradation I                                                  |                                                        |          |
| 2572232223 | t3m_00579 | Metacyc        | PWY-5958: acridone alkaloid biosynthesis                                              |                                                        |          |
| 2572232223 | t3m_00579 | Metacyc        | PWY-6048: methylthiopropionate degradation I (cleavage)                               |                                                        |          |
| 2572232223 | t3m_00579 | Metacyc        | PWY-5140: cannabinoid biosynthesis                                                    |                                                        |          |
| 2572232223 | t3m_00579 | Metacyc        | PWY-6670: citronellol degradation                                                     |                                                        |          |
| 2572232223 | t3m_00579 | Metacyc        | PWY-6733: sporopollenin precursor biosynthesis                                        |                                                        |          |
| 2572232223 | t3m_00579 | Metacyc        | PWY-6457: <i>trans</i>-cinnamoyl-CoA biosynthesis                                     |                                                        |          |
| 2572232223 | t3m_00579 | Metacyc        | PWY-6593: sulfoacetate degradation                                                    |                                                        |          |
| 2572232223 | t3m_00579 | COG_category   | [I] Lipid transport and metabolism                                                    |                                                        |          |
| 2572232223 | t3m_00579 | COG_category   | [Q] Secondary metabolites biosynthesis, transport and catabolism                      |                                                        |          |
| 2572232223 | t3m_00579 | COG0318        | Acyl-CoA synthetases (AMP-forming)/AMP-acid ligases II                                |                                                        | 2.00E-97 |
| 2572232223 | t3m_00579 | pfam13193      | AMP-binding_C                                                                         |                                                        | 5.50E-14 |
| 2572232223 | t3m_00579 | pfam00501      | AMP-binding                                                                           |                                                        | 6.50E-87 |
| 2572232223 | t3m_00579 | EC:6.2.1.-     | Ligases. Forming carbon-sulfur bonds. Acid--thiol ligases.                            |                                                        |          |
| 2572232223 | t3m_00579 | KO:K02182      | crotonobetaine/carnitine-CoA ligase [EC:6.2.1.-]                                      |                                                        | 0.00E+00 |
| 2572232223 | t3m_00579 | Locus_type     |                                                                                       | CDS                                                    |          |
| 2572232223 | t3m_00579 | Product_name   |                                                                                       | Acyl-CoA synthetases (AMP-forming)/AMP-acid ligases II |          |
| 2572232223 | t3m_00579 | Scaffold       |                                                                                       | t3m_contig_70_65_len_46776_read_count_3444312.9        |          |



|            |           |                |                                                                  |          |
|------------|-----------|----------------|------------------------------------------------------------------|----------|
| 2572232223 | t3m_00579 | Coordinates    | 6352..7944(+)                                                    |          |
| 2572232223 | t3m_00579 | DNA_length     | 1593bp                                                           |          |
| 2572232223 | t3m_00579 | Protein_length | 530aa                                                            |          |
| 2572232223 | t3m_00579 | GC             |                                                                  | 0.67     |
| 2572232224 | t3m_00580 | COG_category   | [R] General function prediction only                             |          |
| 2572232224 | t3m_00580 | COG1412        | Uncharacterized proteins of PilT N-term./Vapc superfamily        | 4.00E-15 |
| 2572232224 | t3m_00580 | Locus_type     | CDS                                                              |          |
| 2572232224 | t3m_00580 | Product_name   | Uncharacterized proteins of PilT N-term./Vapc superfamily        |          |
| 2572232224 | t3m_00580 | Scaffold       | t3m_contig_70_65_len_46776_read_count_3444312.9                  |          |
| 2572232224 | t3m_00580 | Coordinates    | 7973..8398(+)                                                    |          |
| 2572232224 | t3m_00580 | DNA_length     | 426bp                                                            |          |
| 2572232224 | t3m_00580 | Protein_length | 141aa                                                            |          |
| 2572232224 | t3m_00580 | GC             |                                                                  | 0.77     |
| 2572232225 | t3m_00581 | COG_category   | [Q] Secondary metabolites biosynthesis, transport and catabolism |          |
| 2572232225 | t3m_00581 | COG0412        | Dienelactone hydrolase and related enzymes                       | 3.00E-18 |
| 2572232225 | t3m_00581 | pfam01738      | DLH                                                              | 1.00E-24 |
| 2572232225 | t3m_00581 | Locus_type     | CDS                                                              |          |
| 2572232225 | t3m_00581 | Product_name   | Dienelactone hydrolase and related enzymes                       |          |
| 2572232225 | t3m_00581 | Scaffold       | t3m_contig_70_65_len_46776_read_count_3444312.9                  |          |
| 2572232225 | t3m_00581 | Coordinates    | 8438..9484(+)                                                    |          |
| 2572232225 | t3m_00581 | DNA_length     | 1047bp                                                           |          |
| 2572232225 | t3m_00581 | Protein_length | 348aa                                                            |          |
| 2572232225 | t3m_00581 | GC             |                                                                  | 0.69     |
| 2572232226 | t3m_00582 | Locus_type     | CDS                                                              |          |
| 2572232226 | t3m_00582 | Product_name   | hypothetical protein                                             |          |
| 2572232226 | t3m_00582 | Scaffold       | t3m_contig_70_65_len_46776_read_count_3444312.9                  |          |
| 2572232226 | t3m_00582 | Coordinates    | 9651..10280(+)                                                   |          |
| 2572232226 | t3m_00582 | DNA_length     | 630bp                                                            |          |
| 2572232226 | t3m_00582 | Protein_length | 209aa                                                            |          |
| 2572232226 | t3m_00582 | GC             |                                                                  | 0.67     |
| 2572232226 | t3m_00582 | Transmembrane  | Yes                                                              |          |

|            |           |                |                                                                                        |          |
|------------|-----------|----------------|----------------------------------------------------------------------------------------|----------|
| 2572232227 | t3m_00583 | IMG_pathway    | 1014: Dicarboxylate/4-hydroxybutyrate cycle                                            |          |
| 2572232227 | t3m_00583 | IMG_pathway    | 222: L-isoleucine degradation to propionyl-CoA and acetyl-CoA                          |          |
| 2572232227 | t3m_00583 | IMG_pathway    | 369: Pyruvate conversion to butyrate                                                   |          |
| 2572232227 | t3m_00583 | IMG_pathway    | 389: Crotonyl-CoA conversion to acetate                                                |          |
| 2572232227 | t3m_00583 | IMG_pathway    | 596: 3-hydroxypropionate/4-hydroxybutyrate cycle                                       |          |
| 2572232227 | t3m_00583 | IMG_pathway    | 962: Glyoxylate from acetyl-CoA via ethylmalonyl-CoA pathway                           |          |
| 2572232227 | t3m_00583 | COG_category   | [I] Lipid transport and metabolism                                                     |          |
| 2572232227 | t3m_00583 | COG1250        | 3-hydroxyacyl-CoA dehydrogenase                                                        | 1.00E-73 |
| 2572232227 | t3m_00583 | pfam02737      | 3HCDH_N                                                                                | 2.40E-36 |
| 2572232227 | t3m_00583 | pfam02737      | 3HCDH_N                                                                                | 3.80E-11 |
| 2572232227 | t3m_00583 | pfam00725      | 3HCDH                                                                                  | 2.10E-32 |
| 2572232227 | t3m_00583 | EC:1.1.1.157   | 3-hydroxybutyryl-CoA dehydrogenase.                                                    |          |
| 2572232227 | t3m_00583 | KO:K00074      | 3-hydroxybutyryl-CoA dehydrogenase [EC:1.1.1.157]                                      | 0.00E+00 |
| 2572232227 | t3m_00583 | ITERM:00577    | 3-hydroxyacyl-CoA dehydrogenase (EC 1.1.1.35)                                          |          |
| 2572232227 | t3m_00583 | Locus_type     | CDS                                                                                    |          |
| 2572232227 | t3m_00583 | Product_name   | 3-hydroxyacyl-CoA dehydrogenase (EC 1.1.1.35)                                          |          |
| 2572232227 | t3m_00583 | Scaffold       | t3m_contig_70_65_len_46776_read_count_3444312.9                                        |          |
| 2572232227 | t3m_00583 | Coordinates    | 10358..11323(-)                                                                        |          |
| 2572232227 | t3m_00583 | DNA_length     | 966bp                                                                                  |          |
| 2572232227 | t3m_00583 | Protein_length | 321aa                                                                                  |          |
| 2572232227 | t3m_00583 | GC             |                                                                                        | 0.67     |
|            |           |                |                                                                                        |          |
| 2572232228 | t3m_00584 | Locus_type     | CDS                                                                                    |          |
| 2572232228 | t3m_00584 | Product_name   | hypothetical protein                                                                   |          |
| 2572232228 | t3m_00584 | Scaffold       | t3m_contig_70_65_len_46776_read_count_3444312.9                                        |          |
| 2572232228 | t3m_00584 | Coordinates    | 11670..11993(-)                                                                        |          |
| 2572232228 | t3m_00584 | DNA_length     | 324bp                                                                                  |          |
| 2572232228 | t3m_00584 | Protein_length | 107aa                                                                                  |          |
| 2572232228 | t3m_00584 | GC             |                                                                                        | 0.71     |
|            |           |                |                                                                                        |          |
| 2572232229 | t3m_00585 | KEGG_module    | M00088: Ketone body biosynthesis, acetyl-CoA => acetoacetate/3-hydroxybutyrate/acetone |          |
| 2572232229 | t3m_00585 | KEGG_module    | M00373: Ethylmalonyl pathway                                                           |          |
| 2572232229 | t3m_00585 | KEGG_module    | M00374: Dicarboxylate-hydroxybutyrate cycle                                            |          |

|            |           |                |                                                                |          |
|------------|-----------|----------------|----------------------------------------------------------------|----------|
| 2572232229 | t3m_00585 | KEGG_module    | M00095: C5 isoprenoid biosynthesis, mevalonate pathway         |          |
| 2572232229 | t3m_00585 | KEGG_module    | M00375: Hydroxypropionate-hydroxybutylate cycle                |          |
| 2572232229 | t3m_00585 | Metacyc        | PWY-5789: 3-hydroxypropionate/4-hydroxybutyrate cycle          |          |
| 2572232229 | t3m_00585 | Metacyc        | PWY-5741: ethylmalonyl pathway                                 |          |
| 2572232229 | t3m_00585 | Metacyc        | PWY-6588: pyruvate fermentation to acetone                     |          |
| 2572232229 | t3m_00585 | Metacyc        | PWY66-368: ketolysis                                           |          |
| 2572232229 | t3m_00585 | Metacyc        | PWY-5177: glutaryl-CoA degradation                             |          |
| 2572232229 | t3m_00585 | Metacyc        | PWY-922: mevalonate pathway I                                  |          |
| 2572232229 | t3m_00585 | Metacyc        | PWY-6876: isopropanol biosynthesis                             |          |
| 2572232229 | t3m_00585 | Metacyc        | PWY-7003: glycerol degradation to butanol                      |          |
| 2572232229 | t3m_00585 | Metacyc        | ACETOACETATE-DEG-PWY: acetoacetate degradation (to acetyl CoA) |          |
| 2572232229 | t3m_00585 | Metacyc        | CENTFERM-PWY: pyruvate fermentation to butanoate               |          |
| 2572232229 | t3m_00585 | Metacyc        | PWY66-367: ketogenesis                                         |          |
| 2572232229 | t3m_00585 | Metacyc        | PWY1-3: polyhydroxybutyrate biosynthesis                       |          |
| 2572232229 | t3m_00585 | Metacyc        | P163-PWY: lysine fermentation to acetate and butyrate          |          |
| 2572232229 | t3m_00585 | Metacyc        | PWY-6863: pyruvate fermentation to hexanol                     |          |
| 2572232229 | t3m_00585 | Metacyc        | PWY-6583: pyruvate fermentation to butanol I                   |          |
| 2572232229 | t3m_00585 | Metacyc        | PWY-6174: mevalonate pathway II (archaea)                      |          |
| 2572232229 | t3m_00585 | Metacyc        | PWY-6883: pyruvate fermentation to butanol II                  |          |
| 2572232229 | t3m_00585 | Metacyc        | PWY-5676: acetyl-CoA fermentation to butyrate II               |          |
| 2572232229 | t3m_00585 | Metacyc        | ILEUDEG-PWY: isoleucine degradation I                          |          |
| 2572232229 | t3m_00585 | Metacyc        | PWY-5109: 2-methylbutyrate biosynthesis                        |          |
| 2572232229 | t3m_00585 | COG_category   | [I] Lipid transport and metabolism                             |          |
| 2572232229 | t3m_00585 | COG0183        | Acetyl-CoA acetyltransferase                                   | 5.00E-43 |
| 2572232229 | t3m_00585 | pfam02803      | Thiolase_C                                                     | 3.80E-09 |
| 2572232229 | t3m_00585 | EC:2.3.1.9     | Acetyl-CoA C-acetyltransferase.                                |          |
| 2572232229 | t3m_00585 | KO:K00626      | acetyl-CoA C-acetyltransferase [EC:2.3.1.9]                    | 0.00E+00 |
| 2572232229 | t3m_00585 | Locus_type     | CDS                                                            |          |
| 2572232229 | t3m_00585 | Product_name   | Acetyl-CoA acetyltransferase                                   |          |
| 2572232229 | t3m_00585 | Scaffold       | t3m_contig_70_65_len_46776_read_count_3444312.9                |          |
| 2572232229 | t3m_00585 | Coordinates    | 11990..13123(-)                                                |          |
| 2572232229 | t3m_00585 | DNA_length     | 1134bp                                                         |          |
| 2572232229 | t3m_00585 | Protein_length | 377aa                                                          |          |
| 2572232229 | t3m_00585 | GC             |                                                                | 0.69     |

|            |           |                |                                              |                                                 |          |
|------------|-----------|----------------|----------------------------------------------|-------------------------------------------------|----------|
| 2572232230 | t3m_00586 | pfam01870      | Hjc                                          |                                                 | 4.10E-11 |
| 2572232230 | t3m_00586 | Locus_type     |                                              | CDS                                             |          |
| 2572232230 | t3m_00586 | Product_name   |                                              | Archaeal holliday junction resolvase (hjc)      |          |
| 2572232230 | t3m_00586 | Scaffold       |                                              | t3m_contig_70_65_len_46776_read_count_3444312.9 |          |
| 2572232230 | t3m_00586 | Coordinates    |                                              | 13128..13673(-)                                 |          |
| 2572232230 | t3m_00586 | DNA_length     |                                              | 546bp                                           |          |
| 2572232230 | t3m_00586 | Protein_length |                                              | 181aa                                           |          |
| 2572232230 | t3m_00586 | GC             |                                              |                                                 | 0.64     |
|            |           |                |                                              |                                                 |          |
| 2572232231 | t3m_00587 | Locus_type     |                                              | CDS                                             |          |
| 2572232231 | t3m_00587 | Product_name   |                                              | hypothetical protein                            |          |
| 2572232231 | t3m_00587 | Scaffold       |                                              | t3m_contig_70_65_len_46776_read_count_3444312.9 |          |
| 2572232231 | t3m_00587 | Coordinates    |                                              | 13731..15185(+)                                 |          |
| 2572232231 | t3m_00587 | DNA_length     |                                              | 1455bp                                          |          |
| 2572232231 | t3m_00587 | Protein_length |                                              | 484aa                                           |          |
| 2572232231 | t3m_00587 | GC             |                                              |                                                 | 0.67     |
|            |           |                |                                              |                                                 |          |
| 2572232232 | t3m_00588 | Locus_type     |                                              | CDS                                             |          |
| 2572232232 | t3m_00588 | Product_name   |                                              | hypothetical protein                            |          |
| 2572232232 | t3m_00588 | Scaffold       |                                              | t3m_contig_70_65_len_46776_read_count_3444312.9 |          |
| 2572232232 | t3m_00588 | Coordinates    |                                              | 15148..15663(+)                                 |          |
| 2572232232 | t3m_00588 | DNA_length     |                                              | 516bp                                           |          |
| 2572232232 | t3m_00588 | Protein_length |                                              | 171aa                                           |          |
| 2572232232 | t3m_00588 | GC             |                                              |                                                 | 0.72     |
|            |           |                |                                              |                                                 |          |
| 2572232233 | t3m_00589 | COG_category   | [S] Function unknown                         |                                                 |          |
| 2572232233 | t3m_00589 | COG3391        | Uncharacterized conserved protein            |                                                 | 7.00E-09 |
| 2572232233 | t3m_00589 | pfam00801      | PKD                                          |                                                 | 1.00E-07 |
| 2572232233 | t3m_00589 | pfam00801      | PKD                                          |                                                 | 9.40E-11 |
| 2572232233 | t3m_00589 | TIGR02276      | 40-residue YVTN family beta-propeller repeat |                                                 | 5.80E-09 |
| 2572232233 | t3m_00589 | Locus_type     |                                              | CDS                                             |          |
| 2572232233 | t3m_00589 | Product_name   |                                              | Uncharacterized conserved protein               |          |
| 2572232233 | t3m_00589 | Scaffold       |                                              | t3m_contig_70_65_len_46776_read_count_3444312.9 |          |

|            |           |                |                                                         |          |
|------------|-----------|----------------|---------------------------------------------------------|----------|
| 2572232233 | t3m_00589 | Coordinates    | 15648..18695(-)                                         |          |
| 2572232233 | t3m_00589 | DNA_length     | 3048bp                                                  |          |
| 2572232233 | t3m_00589 | Protein_length | 1015aa                                                  |          |
| 2572232233 | t3m_00589 | GC             |                                                         | 0.62     |
| 2572232233 | t3m_00589 | Transmembrane  | Yes                                                     |          |
|            |           |                |                                                         |          |
| 2572232234 | t3m_00590 | Locus_type     | CDS                                                     |          |
| 2572232234 | t3m_00590 | Product_name   | hypothetical protein                                    |          |
| 2572232234 | t3m_00590 | Scaffold       | t3m_contig_70_65_len_46776_read_count_3444312.9         |          |
| 2572232234 | t3m_00590 | Coordinates    | 19060..19890(-)                                         |          |
| 2572232234 | t3m_00590 | DNA_length     | 831bp                                                   |          |
| 2572232234 | t3m_00590 | Protein_length | 276aa                                                   |          |
| 2572232234 | t3m_00590 | GC             |                                                         | 0.66     |
|            |           |                |                                                         |          |
| 2572232235 | t3m_00591 | COG_category   | [S] Function unknown                                    |          |
| 2572232235 | t3m_00591 | COG4260        | Putative virion core protein (lumpy skin disease virus) | 3.00E-33 |
| 2572232235 | t3m_00591 | pfam13421      | Band_7_1                                                | 2.20E-35 |
| 2572232235 | t3m_00591 | pfam13240      | zinc_ribbon_2                                           | 1.40E-06 |
| 2572232235 | t3m_00591 | pfam12773      | DZR                                                     | 2.40E-11 |
| 2572232235 | t3m_00591 | Locus_type     | CDS                                                     |          |
| 2572232235 | t3m_00591 | Product_name   | Putative virion core protein (lumpy skin disease virus) |          |
| 2572232235 | t3m_00591 | Scaffold       | t3m_contig_70_65_len_46776_read_count_3444312.9         |          |
| 2572232235 | t3m_00591 | Coordinates    | 20095..21252(-)                                         |          |
| 2572232235 | t3m_00591 | DNA_length     | 1158bp                                                  |          |
| 2572232235 | t3m_00591 | Protein_length | 385aa                                                   |          |
| 2572232235 | t3m_00591 | GC             |                                                         | 0.67     |
| 2572232235 | t3m_00591 | Fused_gene     | Yes                                                     |          |
|            |           |                |                                                         |          |
| 2572232236 | t3m_00592 | Locus_type     | CDS                                                     |          |
| 2572232236 | t3m_00592 | Product_name   | hypothetical protein                                    |          |
| 2572232236 | t3m_00592 | Scaffold       | t3m_contig_70_65_len_46776_read_count_3444312.9         |          |
| 2572232236 | t3m_00592 | Coordinates    | 21279..21809(-)                                         |          |
| 2572232236 | t3m_00592 | DNA_length     | 531bp                                                   |          |
| 2572232236 | t3m_00592 | Protein_length | 176aa                                                   |          |

|            |           |                |                                                 |          |
|------------|-----------|----------------|-------------------------------------------------|----------|
| 2572232236 | t3m_00592 | GC             |                                                 | 0.67     |
| 2572232237 | t3m_00593 | Locus_type     | CDS                                             |          |
| 2572232237 | t3m_00593 | Product_name   | hypothetical protein                            |          |
| 2572232237 | t3m_00593 | Scaffold       | t3m_contig_70_65_len_46776_read_count_3444312.9 |          |
| 2572232237 | t3m_00593 | Coordinates    | 21985..22530(-)                                 |          |
| 2572232237 | t3m_00593 | DNA_length     | 546bp                                           |          |
| 2572232237 | t3m_00593 | Protein_length | 181aa                                           |          |
| 2572232237 | t3m_00593 | GC             |                                                 | 0.68     |
| 2572232237 | t3m_00593 | Transmembrane  | Yes                                             |          |
| 2572232238 | t3m_00594 | pfam14559      | TPR_19                                          | 1.30E-05 |
| 2572232238 | t3m_00594 | pfam13414      | TPR_11                                          | 9.70E-10 |
| 2572232238 | t3m_00594 | pfam13432      | TPR_16                                          | 3.00E-08 |
| 2572232238 | t3m_00594 | pfam14559      | TPR_19                                          | 1.90E-11 |
| 2572232238 | t3m_00594 | pfam13432      | TPR_16                                          | 1.90E-06 |
| 2572232238 | t3m_00594 | pfam07719      | TPR_2                                           | 5.50E-02 |
| 2572232238 | t3m_00594 | pfam13432      | TPR_16                                          | 2.70E-07 |
| 2572232238 | t3m_00594 | Locus_type     | CDS                                             |          |
| 2572232238 | t3m_00594 | Product_name   | Tetratricopeptide repeat/TPR repeat             |          |
| 2572232238 | t3m_00594 | Scaffold       | t3m_contig_70_65_len_46776_read_count_3444312.9 |          |
| 2572232238 | t3m_00594 | Coordinates    | 22613..27202(-)                                 |          |
| 2572232238 | t3m_00594 | DNA_length     | 4590bp                                          |          |
| 2572232238 | t3m_00594 | Protein_length | 1529aa                                          |          |
| 2572232238 | t3m_00594 | GC             |                                                 | 0.71     |
| 2572232239 | t3m_00595 | COG_category   | [R] General function prediction only            |          |
| 2572232239 | t3m_00595 | COG1078        | HD superfamily phosphohydrolases                | 8.00E-73 |
| 2572232239 | t3m_00595 | pfam01966      | HD                                              | 4.00E-11 |
| 2572232239 | t3m_00595 | Locus_type     | CDS                                             |          |
| 2572232239 | t3m_00595 | Product_name   | HD superfamily phosphohydrolases                |          |
| 2572232239 | t3m_00595 | Scaffold       | t3m_contig_70_65_len_46776_read_count_3444312.9 |          |
| 2572232239 | t3m_00595 | Coordinates    | 27321..28577(+)                                 |          |
| 2572232239 | t3m_00595 | DNA_length     | 1257bp                                          |          |

|            |           |                |                                                                   |          |
|------------|-----------|----------------|-------------------------------------------------------------------|----------|
| 2572232239 | t3m_00595 | Protein_length | 418aa                                                             |          |
| 2572232239 | t3m_00595 | GC             |                                                                   | 0.72     |
| 2572232240 | t3m_00596 | COG_category   | [T] Signal transduction mechanisms                                |          |
| 2572232240 | t3m_00596 | COG0467        | RecA-superfamily ATPases implicated in signal transduction        | 8.00E-24 |
| 2572232240 | t3m_00596 | pfam06745      | KaiC                                                              | 6.60E-38 |
| 2572232240 | t3m_00596 | KO:K08482      | circadian clock protein KaiC                                      | 7.50E-25 |
| 2572232240 | t3m_00596 | Locus_type     | CDS                                                               |          |
| 2572232240 | t3m_00596 | Product_name   | RecA-superfamily ATPases implicated in signal transduction        |          |
| 2572232240 | t3m_00596 | Scaffold       | t3m_contig_70_65_len_46776_read_count_3444312.9                   |          |
| 2572232240 | t3m_00596 | Coordinates    | 28636..29352(-)                                                   |          |
| 2572232240 | t3m_00596 | DNA_length     | 717bp                                                             |          |
| 2572232240 | t3m_00596 | Protein_length | 238aa                                                             |          |
| 2572232240 | t3m_00596 | GC             |                                                                   | 0.68     |
| 2572232241 | t3m_00597 | COG_category   | [T] Signal transduction mechanisms                                |          |
| 2572232241 | t3m_00597 | COG0467        | RecA-superfamily ATPases implicated in signal transduction        | 3.00E-26 |
| 2572232241 | t3m_00597 | pfam06745      | KaiC                                                              | 4.60E-31 |
| 2572232241 | t3m_00597 | Locus_type     | CDS                                                               |          |
| 2572232241 | t3m_00597 | Product_name   | RecA-superfamily ATPases implicated in signal transduction        |          |
| 2572232241 | t3m_00597 | Scaffold       | t3m_contig_70_65_len_46776_read_count_3444312.9                   |          |
| 2572232241 | t3m_00597 | Coordinates    | 29413..31569(-)                                                   |          |
| 2572232241 | t3m_00597 | DNA_length     | 2157bp                                                            |          |
| 2572232241 | t3m_00597 | Protein_length | 718aa                                                             |          |
| 2572232241 | t3m_00597 | GC             |                                                                   | 0.72     |
| 2572232242 | t3m_00598 | KEGG_module    | M00004: Pentose phosphate pathway (Pentose phosphate cycle)       |          |
| 2572232242 | t3m_00598 | KEGG_module    | M00001: Glycolysis (Embden-Meyerhof pathway), glucose => pyruvate |          |
| 2572232242 | t3m_00598 | KEGG_module    | M00114: Ascorbate biosynthesis, plants, glucose-6P => ascorbate   |          |
| 2572232242 | t3m_00598 | Metacyc        | PWY-3861: mannitol degradation II                                 |          |
| 2572232242 | t3m_00598 | Metacyc        | GLUCONEO-PWY: gluconeogenesis I                                   |          |
| 2572232242 | t3m_00598 | Metacyc        | PWY-5659: GDP-mannose biosynthesis                                |          |
| 2572232242 | t3m_00598 | Metacyc        | PWY-5384: sucrose degradation IV                                  |          |
| 2572232242 | t3m_00598 | Metacyc        | PWY-5054: sorbitol biosynthesis I                                 |          |

|            |           |                |                                                                              |          |
|------------|-----------|----------------|------------------------------------------------------------------------------|----------|
| 2572232242 | t3m_00598 | Metacyc        | PWY-6981: chitin biosynthesis                                                |          |
| 2572232242 | t3m_00598 | Metacyc        | RUMP-PWY: formaldehyde oxidation I                                           |          |
| 2572232242 | t3m_00598 | Metacyc        | GLYCOLYSIS: glycolysis I                                                     |          |
| 2572232242 | t3m_00598 | Metacyc        | ANAGLYCOLYSIS-PWY: glycolysis III (glucokinase)                              |          |
| 2572232242 | t3m_00598 | Metacyc        | P341-PWY: glycolysis V (Pyrococcus)                                          |          |
| 2572232242 | t3m_00598 | Metacyc        | PWY-3801: sucrose degradation VI (anaerobic)                                 |          |
| 2572232242 | t3m_00598 | Metacyc        | MANNCAT-PWY: D-mannose degradation                                           |          |
| 2572232242 | t3m_00598 | Metacyc        | PWY-621: sucrose degradation III                                             |          |
| 2572232242 | t3m_00598 | Metacyc        | SUCSYN-PWY: sucrose biosynthesis                                             |          |
| 2572232242 | t3m_00598 | Metacyc        | PWY-6531: mannitol cycle                                                     |          |
| 2572232242 | t3m_00598 | Metacyc        | PWY-882: L-ascorbate biosynthesis I (L-galactose pathway)                    |          |
| 2572232242 | t3m_00598 | Metacyc        | PWY-3881: mannitol biosynthesis                                              |          |
| 2572232242 | t3m_00598 | Metacyc        | PWY-5514: UDP-N-acetyl-D-galactosamine biosynthesis II                       |          |
| 2572232242 | t3m_00598 | Metacyc        | P124-PWY: Bifidobacterium shunt                                              |          |
| 2572232242 | t3m_00598 | Metacyc        | PWY-6142: gluconeogenesis II ( <i>Methanobacterium thermoautotrophicum</i> ) |          |
| 2572232242 | t3m_00598 | Metacyc        | PWY-622: starch biosynthesis                                                 |          |
| 2572232242 | t3m_00598 | Metacyc        | P122-PWY: heterolactic fermentation                                          |          |
| 2572232242 | t3m_00598 | Metacyc        | ANAEROFrucAT-PWY: homolactic fermentation                                    |          |
| 2572232242 | t3m_00598 | COG_category   | [G] Carbohydrate transport and metabolism                                    |          |
| 2572232242 | t3m_00598 | COG0166        | Glucose-6-phosphate isomerase                                                | 2.00E-14 |
| 2572232242 | t3m_00598 | pfam10432      | bact-PGI_C                                                                   | 2.60E-28 |
| 2572232242 | t3m_00598 | EC:5.3.1.8     | Mannose-6-phosphate isomerase.                                               |          |
| 2572232242 | t3m_00598 | EC:5.3.1.9     | Glucose-6-phosphate isomerase.                                               |          |
| 2572232242 | t3m_00598 | TIGR02128      | bifunctional phosphoglucose/phosphomannose isomerase                         | 1.60E-57 |
| 2572232242 | t3m_00598 | KO:K15916      | glucose/mannose-6-phosphate isomerase [EC:5.3.1.9 5.3.1.8]                   | 1.00E-42 |
| 2572232242 | t3m_00598 | Locus_type     | CDS                                                                          |          |
| 2572232242 | t3m_00598 | Product_name   | Glucose-6-phosphate isomerase                                                |          |
| 2572232242 | t3m_00598 | Scaffold       | t3m_contig_70_65_len_46776_read_count_3444312.9                              |          |
| 2572232242 | t3m_00598 | Coordinates    | 31745..32758(+)                                                              |          |
| 2572232242 | t3m_00598 | DNA_length     | 1014bp                                                                       |          |
| 2572232242 | t3m_00598 | Protein_length | 337aa                                                                        |          |
| 2572232242 | t3m_00598 | GC             |                                                                              | 0.72     |
| 2572232243 | t3m_00599 | Locus_type     | CDS                                                                          |          |



|            |           |                |                                                                              |          |
|------------|-----------|----------------|------------------------------------------------------------------------------|----------|
| 2572232243 | t3m_00599 | Product_name   | hypothetical protein                                                         |          |
| 2572232243 | t3m_00599 | Scaffold       | t3m_contig_70_65_len_46776_read_count_3444312.9                              |          |
| 2572232243 | t3m_00599 | Coordinates    | 33036..33242(+)                                                              |          |
| 2572232243 | t3m_00599 | DNA_length     | 207bp                                                                        |          |
| 2572232243 | t3m_00599 | Protein_length | 68aa                                                                         |          |
| 2572232243 | t3m_00599 | GC             |                                                                              | 0.75     |
|            |           |                |                                                                              |          |
| 2572232244 | t3m_00600 | Locus_type     | CDS                                                                          |          |
| 2572232244 | t3m_00600 | Product_name   | hypothetical protein                                                         |          |
| 2572232244 | t3m_00600 | Scaffold       | t3m_contig_70_65_len_46776_read_count_3444312.9                              |          |
| 2572232244 | t3m_00600 | Coordinates    | 33396..34568(+)                                                              |          |
| 2572232244 | t3m_00600 | DNA_length     | 1173bp                                                                       |          |
| 2572232244 | t3m_00600 | Protein_length | 390aa                                                                        |          |
| 2572232244 | t3m_00600 | GC             |                                                                              | 0.71     |
|            |           |                |                                                                              |          |
| 2572232245 | t3m_00601 | Locus_type     | CDS                                                                          |          |
| 2572232245 | t3m_00601 | Product_name   | hypothetical protein                                                         |          |
| 2572232245 | t3m_00601 | Scaffold       | t3m_contig_70_65_len_46776_read_count_3444312.9                              |          |
| 2572232245 | t3m_00601 | Coordinates    | 34572..35657(+)                                                              |          |
| 2572232245 | t3m_00601 | DNA_length     | 1086bp                                                                       |          |
| 2572232245 | t3m_00601 | Protein_length | 361aa                                                                        |          |
| 2572232245 | t3m_00601 | GC             |                                                                              | 0.72     |
|            |           |                |                                                                              |          |
| 2572232246 | t3m_00602 | Locus_type     | CDS                                                                          |          |
| 2572232246 | t3m_00602 | Product_name   | hypothetical protein                                                         |          |
| 2572232246 | t3m_00602 | Scaffold       | t3m_contig_70_65_len_46776_read_count_3444312.9                              |          |
| 2572232246 | t3m_00602 | Coordinates    | 35737..35958(+)                                                              |          |
| 2572232246 | t3m_00602 | DNA_length     | 222bp                                                                        |          |
| 2572232246 | t3m_00602 | Protein_length | 73aa                                                                         |          |
| 2572232246 | t3m_00602 | GC             |                                                                              | 0.75     |
|            |           |                |                                                                              |          |
| 2572232247 | t3m_00603 | COG_category   | [K] Transcription                                                            |          |
| 2572232247 | t3m_00603 | COG1405        | Transcription initiation factor TFIIIB, Brf1 subunit/Transcription initiatio | 2.00E-99 |
| 2572232247 | t3m_00603 | pfam00382      | TFIIIB                                                                       | 3.70E-19 |

|            |           |                |                                                                 |          |
|------------|-----------|----------------|-----------------------------------------------------------------|----------|
| 2572232247 | t3m_00603 | pfam00382      | TFIIB                                                           | 6.80E-23 |
| 2572232247 | t3m_00603 | pfam08271      | TF_Zn_Ribbon                                                    | 4.80E-17 |
| 2572232247 | t3m_00603 | KO:K03124      | transcription initiation factor TFIIB                           | 0.00E+00 |
| 2572232247 | t3m_00603 | Locus_type     | CDS                                                             |          |
| 2572232247 | t3m_00603 | Product_name   | Transcription initiation factor IIB (TFIIB)                     |          |
| 2572232247 | t3m_00603 | Scaffold       | t3m_contig_70_65_len_46776_read_count_3444312.9                 |          |
| 2572232247 | t3m_00603 | Coordinates    | 35973..36941(+)                                                 |          |
| 2572232247 | t3m_00603 | DNA_length     | 969bp                                                           |          |
| 2572232247 | t3m_00603 | Protein_length | 322aa                                                           |          |
| 2572232247 | t3m_00603 | GC             |                                                                 | 0.67     |
| 2572232248 | t3m_00604 | COG_category   | [R] General function prediction only                            |          |
| 2572232248 | t3m_00604 | COG0312        | Predicted Zn-dependent proteases and their inactivated homologs | 6.00E-67 |
| 2572232248 | t3m_00604 | pfam01523      | PmbA_TldD                                                       | 2.60E-55 |
| 2572232248 | t3m_00604 | KO:K03568      | TldD protein                                                    | 0.00E+00 |
| 2572232248 | t3m_00604 | Locus_type     | CDS                                                             |          |
| 2572232248 | t3m_00604 | Product_name   | Predicted Zn-dependent proteases and their inactivated homologs |          |
| 2572232248 | t3m_00604 | Scaffold       | t3m_contig_70_65_len_46776_read_count_3444312.9                 |          |
| 2572232248 | t3m_00604 | Coordinates    | 37028..38476(+)                                                 |          |
| 2572232248 | t3m_00604 | DNA_length     | 1449bp                                                          |          |
| 2572232248 | t3m_00604 | Protein_length | 482aa                                                           |          |
| 2572232248 | t3m_00604 | GC             |                                                                 | 0.71     |
| 2572232249 | t3m_00605 | COG_category   | [R] General function prediction only                            |          |
| 2572232249 | t3m_00605 | COG0312        | Predicted Zn-dependent proteases and their inactivated homologs | 5.00E-44 |
| 2572232249 | t3m_00605 | pfam01523      | PmbA_TldD                                                       | 2.10E-40 |
| 2572232249 | t3m_00605 | Locus_type     | CDS                                                             |          |
| 2572232249 | t3m_00605 | Product_name   | Predicted Zn-dependent proteases and their inactivated homologs |          |
| 2572232249 | t3m_00605 | Scaffold       | t3m_contig_70_65_len_46776_read_count_3444312.9                 |          |
| 2572232249 | t3m_00605 | Coordinates    | 38479..39852(+)                                                 |          |
| 2572232249 | t3m_00605 | DNA_length     | 1374bp                                                          |          |
| 2572232249 | t3m_00605 | Protein_length | 457aa                                                           |          |
| 2572232249 | t3m_00605 | GC             |                                                                 | 0.71     |

|            |           |                |                                                                       |          |
|------------|-----------|----------------|-----------------------------------------------------------------------|----------|
| 2572232250 | t3m_00606 | KEGG_module    | M00048: Inosine monophosphate biosynthesis, PRPP + glutamine => IMP   |          |
| 2572232250 | t3m_00606 | Metacyc        | PWY-6613: tetrahydrofolate salvage from 5,10-methenyltetrahydrofolate |          |
| 2572232250 | t3m_00606 | Metacyc        | PWY-6121: 5-aminoimidazole ribonucleotide biosynthesis I              |          |
| 2572232250 | t3m_00606 | COG_category   | [F] Nucleotide transport and metabolism                               |          |
| 2572232250 | t3m_00606 | COG0299        | Folate-dependent phosphoribosylglycinamide formyltransferase PurN     | 5.00E-51 |
| 2572232250 | t3m_00606 | pfam00551      | Formyl_trans_N                                                        | 9.20E-42 |
| 2572232250 | t3m_00606 | EC:2.1.2.2     | Phosphoribosylglycinamide formyltransferase.                          |          |
| 2572232250 | t3m_00606 | TIGR00639      | phosphoribosylglycinamide formyltransferase, formyltetrahydrofolate-  | 2.80E-49 |
| 2572232250 | t3m_00606 | KO:K11175      | phosphoribosylglycinamide formyltransferase 1 [EC:2.1.2.2]            | 1.40E-45 |
| 2572232250 | t3m_00606 | Locus_type     | CDS                                                                   |          |
| 2572232250 | t3m_00606 | Product_name   | phosphoribosylglycinamide formyltransferase, formyltetrahydrofolate-d |          |
| 2572232250 | t3m_00606 | Scaffold       | t3m_contig_70_65_len_46776_read_count_3444312.9                       |          |
| 2572232250 | t3m_00606 | Coordinates    | 39874..40533(+)                                                       |          |
| 2572232250 | t3m_00606 | DNA_length     | 660bp                                                                 |          |
| 2572232250 | t3m_00606 | Protein_length | 219aa                                                                 |          |
| 2572232250 | t3m_00606 | GC             |                                                                       | 0.73     |
| 2572232251 | t3m_00607 | pfam02195      | ParBc                                                                 | 5.90E-09 |
| 2572232251 | t3m_00607 | Locus_type     | CDS                                                                   |          |
| 2572232251 | t3m_00607 | Product_name   | ParB-like nuclease domain                                             |          |
| 2572232251 | t3m_00607 | Scaffold       | t3m_contig_70_65_len_46776_read_count_3444312.9                       |          |
| 2572232251 | t3m_00607 | Coordinates    | 40506..40955(-)                                                       |          |
| 2572232251 | t3m_00607 | DNA_length     | 450bp                                                                 |          |
| 2572232251 | t3m_00607 | Protein_length | 149aa                                                                 |          |
| 2572232251 | t3m_00607 | GC             |                                                                       | 0.69     |
| 2572232252 | t3m_00608 | COG_category   | [O] Posttranslational modification, protein turnover, chaperones      |          |
| 2572232252 | t3m_00608 | COG1975        | Xanthine and CO dehydrogenases maturation factor, XdhC/CoxF family    | 2.00E-28 |
| 2572232252 | t3m_00608 | pfam02625      | XdhC_CoxI                                                             | 1.00E-19 |
| 2572232252 | t3m_00608 | pfam13478      | XdhC_C                                                                | 2.20E-31 |
| 2572232252 | t3m_00608 | KO:K07402      | xanthine dehydrogenase accessory factor                               | 2.90E-35 |
| 2572232252 | t3m_00608 | Locus_type     | CDS                                                                   |          |
| 2572232252 | t3m_00608 | Product_name   | Xanthine and CO dehydrogenases maturation factor, XdhC/CoxF family    |          |
| 2572232252 | t3m_00608 | Scaffold       | t3m_contig_70_65_len_46776_read_count_3444312.9                       |          |

|            |           |                |                                                     |          |
|------------|-----------|----------------|-----------------------------------------------------|----------|
| 2572232252 | t3m_00608 | Coordinates    | 41058..41903(-)                                     |          |
| 2572232252 | t3m_00608 | DNA_length     | 846bp                                               |          |
| 2572232252 | t3m_00608 | Protein_length | 281aa                                               |          |
| 2572232252 | t3m_00608 | GC             |                                                     | 0.69     |
| 2572232253 | t3m_00609 | COG_category   | [R] General function prediction only                |          |
| 2572232253 | t3m_00609 | COG2068        | Uncharacterized MobA-related protein                | 1.00E-24 |
| 2572232253 | t3m_00609 | pfam12804      | NTP_transf_3                                        | 5.80E-32 |
| 2572232253 | t3m_00609 | Locus_type     | CDS                                                 |          |
| 2572232253 | t3m_00609 | Product_name   | Uncharacterized MobA-related protein                |          |
| 2572232253 | t3m_00609 | Scaffold       | t3m_contig_70_65_len_46776_read_count_3444312.9     |          |
| 2572232253 | t3m_00609 | Coordinates    | 41903..42511(-)                                     |          |
| 2572232253 | t3m_00609 | DNA_length     | 609bp                                               |          |
| 2572232253 | t3m_00609 | Protein_length | 202aa                                               |          |
| 2572232253 | t3m_00609 | GC             |                                                     | 0.71     |
| 2572232254 | t3m_00610 | KEGG_module    | M00177: Ribosome, eukaryotes                        |          |
| 2572232254 | t3m_00610 | KEGG_module    | M00179: Ribosome, archaea                           |          |
| 2572232254 | t3m_00610 | COG_category   | [J] Translation, ribosomal structure and biogenesis |          |
| 2572232254 | t3m_00610 | COG2238        | Ribosomal protein S19E (S16A)                       | 1.00E-43 |
| 2572232254 | t3m_00610 | pfam01090      | Ribosomal_S19e                                      | 4.90E-49 |
| 2572232254 | t3m_00610 | KO:K02966      | small subunit ribosomal protein S19e                | 1.40E-37 |
| 2572232254 | t3m_00610 | ITERM:00336    | SSU ribosomal protein S19E                          |          |
| 2572232254 | t3m_00610 | Locus_type     | CDS                                                 |          |
| 2572232254 | t3m_00610 | Product_name   | SSU ribosomal protein S19E                          |          |
| 2572232254 | t3m_00610 | Scaffold       | t3m_contig_70_65_len_46776_read_count_3444312.9     |          |
| 2572232254 | t3m_00610 | Coordinates    | 42710..43165(+)                                     |          |
| 2572232254 | t3m_00610 | DNA_length     | 456bp                                               |          |
| 2572232254 | t3m_00610 | Protein_length | 151aa                                               |          |
| 2572232254 | t3m_00610 | GC             |                                                     | 0.66     |
| 2572232255 | t3m_00611 | COG_category   | [R] General function prediction only                |          |
| 2572232255 | t3m_00611 | COG2118        | DNA-binding protein                                 | 3.00E-11 |
| 2572232255 | t3m_00611 | pfam01984      | dsDNA_bind                                          | 3.60E-28 |

|            |           |                |                                                     |          |
|------------|-----------|----------------|-----------------------------------------------------|----------|
| 2572232255 | t3m_00611 | KO:K06875      | programmed cell death protein 5                     | 4.90E-25 |
| 2572232255 | t3m_00611 | ITERM:01948    | DNA-binding TFAR19-related protein                  |          |
| 2572232255 | t3m_00611 | Locus_type     | CDS                                                 |          |
| 2572232255 | t3m_00611 | Product_name   | DNA-binding TFAR19-related protein                  |          |
| 2572232255 | t3m_00611 | Scaffold       | t3m_contig_70_65_len_46776_read_count_3444312.9     |          |
| 2572232255 | t3m_00611 | Coordinates    | 43195..43554(+)                                     |          |
| 2572232255 | t3m_00611 | DNA_length     | 360bp                                               |          |
| 2572232255 | t3m_00611 | Protein_length | 119aa                                               |          |
| 2572232255 | t3m_00611 | GC             |                                                     | 0.7      |
| 2572232256 | t3m_00612 | KEGG_module    | M00177: Ribosome, eukaryotes                        |          |
| 2572232256 | t3m_00612 | KEGG_module    | M00179: Ribosome, archaea                           |          |
| 2572232256 | t3m_00612 | pfam00832      | Ribosomal_L39                                       | 6.70E-13 |
| 2572232256 | t3m_00612 | KO:K02924      | large subunit ribosomal protein L39e                | 5.70E-10 |
| 2572232256 | t3m_00612 | ITERM:00272    | LSU ribosomal protein L39E                          |          |
| 2572232256 | t3m_00612 | Locus_type     | CDS                                                 |          |
| 2572232256 | t3m_00612 | Product_name   | LSU ribosomal protein L39E                          |          |
| 2572232256 | t3m_00612 | Scaffold       | t3m_contig_70_65_len_46776_read_count_3444312.9     |          |
| 2572232256 | t3m_00612 | Coordinates    | 43567..43725(+)                                     |          |
| 2572232256 | t3m_00612 | DNA_length     | 159bp                                               |          |
| 2572232256 | t3m_00612 | Protein_length | 52aa                                                |          |
| 2572232256 | t3m_00612 | GC             |                                                     | 0.65     |
| 2572232257 | t3m_00613 | KEGG_module    | M00179: Ribosome, archaea                           |          |
| 2572232257 | t3m_00613 | KEGG_module    | M00177: Ribosome, eukaryotes                        |          |
| 2572232257 | t3m_00613 | COG_category   | [J] Translation, ribosomal structure and biogenesis |          |
| 2572232257 | t3m_00613 | COG2097        | Ribosomal protein L31E                              | 9.00E-18 |
| 2572232257 | t3m_00613 | pfam01198      | Ribosomal_L31e                                      | 2.30E-26 |
| 2572232257 | t3m_00613 | KO:K02910      | large subunit ribosomal protein L31e                | 1.30E-15 |
| 2572232257 | t3m_00613 | Locus_type     | CDS                                                 |          |
| 2572232257 | t3m_00613 | Product_name   | Ribosomal protein L31E                              |          |
| 2572232257 | t3m_00613 | Scaffold       | t3m_contig_70_65_len_46776_read_count_3444312.9     |          |
| 2572232257 | t3m_00613 | Coordinates    | 43757..44053(+)                                     |          |
| 2572232257 | t3m_00613 | DNA_length     | 297bp                                               |          |

|            |           |                |                                                     |  |          |
|------------|-----------|----------------|-----------------------------------------------------|--|----------|
| 2572232257 | t3m_00613 | Protein_length | 98aa                                                |  |          |
| 2572232257 | t3m_00613 | GC             |                                                     |  | 0.67     |
| 2572232258 | t3m_00614 | COG_category   | [J] Translation, ribosomal structure and biogenesis |  |          |
| 2572232258 | t3m_00614 | COG1976        | Translation initiation factor 6 (eIF-6)             |  | 3.00E-51 |
| 2572232258 | t3m_00614 | pfam01912      | eIF-6                                               |  | 1.00E-58 |
| 2572232258 | t3m_00614 | TIGR00323      | translation initiation factor eIF-6, putative       |  | 3.60E-61 |
| 2572232258 | t3m_00614 | KO:K03264      | translation initiation factor 6                     |  | 3.90E-41 |
| 2572232258 | t3m_00614 | ITERM:01949    | translation initiation factor 6 (aeIF-6)            |  |          |
| 2572232258 | t3m_00614 | Locus_type     | CDS                                                 |  |          |
| 2572232258 | t3m_00614 | Product_name   | translation initiation factor 6 (aeIF-6)            |  |          |
| 2572232258 | t3m_00614 | Scaffold       | t3m_contig_70_65_len_46776_read_count_3444312.9     |  |          |
| 2572232258 | t3m_00614 | Coordinates    | 44099..44743(+)                                     |  |          |
| 2572232258 | t3m_00614 | DNA_length     | 645bp                                               |  |          |
| 2572232258 | t3m_00614 | Protein_length | 214aa                                               |  |          |
| 2572232258 | t3m_00614 | GC             |                                                     |  | 0.69     |
| 2572232259 | t3m_00615 | KEGG_module    | M00177: Ribosome, eukaryotes                        |  |          |
| 2572232259 | t3m_00615 | KEGG_module    | M00179: Ribosome, archaea                           |  |          |
| 2572232259 | t3m_00615 | COG_category   | [J] Translation, ribosomal structure and biogenesis |  |          |
| 2572232259 | t3m_00615 | COG1383        | Ribosomal protein S17E                              |  | 1.00E-11 |
| 2572232259 | t3m_00615 | pfam00833      | Ribosomal_S17e                                      |  | 2.80E-10 |
| 2572232259 | t3m_00615 | KO:K02962      | small subunit ribosomal protein S17e                |  | 5.00E-12 |
| 2572232259 | t3m_00615 | ITERM:00327    | SSU ribosomal protein S17E                          |  |          |
| 2572232259 | t3m_00615 | Locus_type     | CDS                                                 |  |          |
| 2572232259 | t3m_00615 | Product_name   | SSU ribosomal protein S17E                          |  |          |
| 2572232259 | t3m_00615 | Scaffold       | t3m_contig_70_65_len_46776_read_count_3444312.9     |  |          |
| 2572232259 | t3m_00615 | Coordinates    | 44799..45023(-)                                     |  |          |
| 2572232259 | t3m_00615 | DNA_length     | 225bp                                               |  |          |
| 2572232259 | t3m_00615 | Protein_length | 74aa                                                |  |          |
| 2572232259 | t3m_00615 | GC             |                                                     |  | 0.62     |
| 2572232260 | t3m_00616 | pfam13519      | VWA_2                                               |  | 3.20E-12 |
| 2572232260 | t3m_00616 | Locus_type     | CDS                                                 |  |          |

|            |           |                |                                                            |          |
|------------|-----------|----------------|------------------------------------------------------------|----------|
| 2572232260 | t3m_00616 | Product_name   | von Willebrand factor type A domain                        |          |
| 2572232260 | t3m_00616 | Scaffold       | t3m_contig_70_65_len_46776_read_count_3444312.9            |          |
| 2572232260 | t3m_00616 | Coordinates    | 45230..46735(+)                                            |          |
| 2572232260 | t3m_00616 | DNA_length     | 1506bp                                                     |          |
| 2572232260 | t3m_00616 | Protein_length | 501aa                                                      |          |
| 2572232260 | t3m_00616 | GC             |                                                            | 0.69     |
|            |           |                |                                                            |          |
| 2572232261 | t3m_00617 | Locus_type     | CDS                                                        |          |
| 2572232261 | t3m_00617 | Product_name   | hypothetical protein                                       |          |
| 2572232261 | t3m_00617 | Scaffold       | t3m_contig_70_75_len_44364_read_count_3757474.10           |          |
| 2572232261 | t3m_00617 | Coordinates    | 112..333(-)                                                |          |
| 2572232261 | t3m_00617 | DNA_length     | 222bp                                                      |          |
| 2572232261 | t3m_00617 | Protein_length | 73aa                                                       |          |
| 2572232261 | t3m_00617 | GC             |                                                            | 0.59     |
|            |           |                |                                                            |          |
| 2572232262 | t3m_00618 | Locus_type     | CDS                                                        |          |
| 2572232262 | t3m_00618 | Product_name   | hypothetical protein                                       |          |
| 2572232262 | t3m_00618 | Scaffold       | t3m_contig_70_75_len_44364_read_count_3757474.10           |          |
| 2572232262 | t3m_00618 | Coordinates    | 1373..1585(-)                                              |          |
| 2572232262 | t3m_00618 | DNA_length     | 213bp                                                      |          |
| 2572232262 | t3m_00618 | Protein_length | 70aa                                                       |          |
| 2572232262 | t3m_00618 | GC             |                                                            | 0.54     |
| 2572232262 | t3m_00618 | Transmembrane  | Yes                                                        |          |
|            |           |                |                                                            |          |
| 2572232263 | t3m_00619 | Locus_type     | CDS                                                        |          |
| 2572232263 | t3m_00619 | Product_name   | hypothetical protein                                       |          |
| 2572232263 | t3m_00619 | Scaffold       | t3m_contig_70_75_len_44364_read_count_3757474.10           |          |
| 2572232263 | t3m_00619 | Coordinates    | 2117..2248(-)                                              |          |
| 2572232263 | t3m_00619 | DNA_length     | 132bp                                                      |          |
| 2572232263 | t3m_00619 | Protein_length | 43aa                                                       |          |
| 2572232263 | t3m_00619 | GC             |                                                            | 0.67     |
|            |           |                |                                                            |          |
| 2572232264 | t3m_00620 | COG_category   | [T] Signal transduction mechanisms                         |          |
| 2572232264 | t3m_00620 | COG0467        | RecA-superfamily ATPases implicated in signal transduction | 2.00E-08 |

|            |           |                |                                                                         |                                                                          |          |
|------------|-----------|----------------|-------------------------------------------------------------------------|--------------------------------------------------------------------------|----------|
| 2572232264 | t3m_00620 | pfam07088      | GvpD                                                                    |                                                                          | 3.10E-23 |
| 2572232264 | t3m_00620 | Locus_type     |                                                                         | CDS                                                                      |          |
| 2572232264 | t3m_00620 | Product_name   |                                                                         | RecA-superfamily ATPases implicated in signal transduction               |          |
| 2572232264 | t3m_00620 | Scaffold       |                                                                         | t3m_contig_70_75_len_44364_read_count_3757474.10                         |          |
| 2572232264 | t3m_00620 | Coordinates    |                                                                         | 2485..3936(+)                                                            |          |
| 2572232264 | t3m_00620 | DNA_length     |                                                                         | 1452bp                                                                   |          |
| 2572232264 | t3m_00620 | Protein_length |                                                                         | 483aa                                                                    |          |
| 2572232264 | t3m_00620 | GC             |                                                                         |                                                                          | 0.63     |
| 2572232265 | t3m_00621 | COG_category   | [R] General function prediction only                                    |                                                                          |          |
| 2572232265 | t3m_00621 | COG1011        | Predicted hydrolase (HAD superfamily)                                   |                                                                          | 8.00E-15 |
| 2572232265 | t3m_00621 | pfam13419      | HAD_2                                                                   |                                                                          | 4.10E-21 |
| 2572232265 | t3m_00621 | TIGR01493      | Haloacid dehalogenase superfamily, subfamily IA, variant 2 with 3rd mc  |                                                                          | 9.10E-10 |
| 2572232265 | t3m_00621 | TIGR01549      | haloacid dehalogenase superfamily, subfamily IA, variant 1 with third m |                                                                          | 1.10E-09 |
| 2572232265 | t3m_00621 | TIGR01509      | haloacid dehalogenase superfamily, subfamily IA, variant 3 with third m |                                                                          | 5.20E-10 |
| 2572232265 | t3m_00621 | KO:K07025      | putative hydrolase of the HAD superfamily                               |                                                                          | 3.40E-11 |
| 2572232265 | t3m_00621 | Locus_type     |                                                                         | CDS                                                                      |          |
| 2572232265 | t3m_00621 | Product_name   |                                                                         | haloacid dehalogenase superfamily, subfamily IA, variant 1 with third mc |          |
| 2572232265 | t3m_00621 | Scaffold       |                                                                         | t3m_contig_70_75_len_44364_read_count_3757474.10                         |          |
| 2572232265 | t3m_00621 | Coordinates    |                                                                         | 4159..4920(+)                                                            |          |
| 2572232265 | t3m_00621 | DNA_length     |                                                                         | 762bp                                                                    |          |
| 2572232265 | t3m_00621 | Protein_length |                                                                         | 253aa                                                                    |          |
| 2572232265 | t3m_00621 | GC             |                                                                         |                                                                          | 0.61     |
| 2572232266 | t3m_00622 | Locus_type     |                                                                         | CDS                                                                      |          |
| 2572232266 | t3m_00622 | Product_name   |                                                                         | hypothetical protein                                                     |          |
| 2572232266 | t3m_00622 | Scaffold       |                                                                         | t3m_contig_70_75_len_44364_read_count_3757474.10                         |          |
| 2572232266 | t3m_00622 | Coordinates    |                                                                         | 5235..5663(+)                                                            |          |
| 2572232266 | t3m_00622 | DNA_length     |                                                                         | 429bp                                                                    |          |
| 2572232266 | t3m_00622 | Protein_length |                                                                         | 142aa                                                                    |          |
| 2572232266 | t3m_00622 | GC             |                                                                         |                                                                          | 0.6      |
| 2572232267 | t3m_00623 | Locus_type     |                                                                         | CDS                                                                      |          |
| 2572232267 | t3m_00623 | Product_name   |                                                                         | hypothetical protein                                                     |          |



|            |           |                |                                                  |
|------------|-----------|----------------|--------------------------------------------------|
| 2572232267 | t3m_00623 | Scaffold       | t3m_contig_70_75_len_44364_read_count_3757474.10 |
| 2572232267 | t3m_00623 | Coordinates    | 5808..6383(-)                                    |
| 2572232267 | t3m_00623 | DNA_length     | 576bp                                            |
| 2572232267 | t3m_00623 | Protein_length | 191aa                                            |
| 2572232267 | t3m_00623 | GC             | 0.58                                             |
| 2572232267 | t3m_00623 | Transmembrane  | Yes                                              |
|            |           |                |                                                  |
| 2572232268 | t3m_00624 | Locus_type     | CDS                                              |
| 2572232268 | t3m_00624 | Product_name   | hypothetical protein                             |
| 2572232268 | t3m_00624 | Scaffold       | t3m_contig_70_75_len_44364_read_count_3757474.10 |
| 2572232268 | t3m_00624 | Coordinates    | 6595..7044(-)                                    |
| 2572232268 | t3m_00624 | DNA_length     | 450bp                                            |
| 2572232268 | t3m_00624 | Protein_length | 149aa                                            |
| 2572232268 | t3m_00624 | GC             | 0.58                                             |
| 2572232268 | t3m_00624 | Transmembrane  | Yes                                              |
|            |           |                |                                                  |
| 2572232269 | t3m_00625 | Locus_type     | CDS                                              |
| 2572232269 | t3m_00625 | Product_name   | hypothetical protein                             |
| 2572232269 | t3m_00625 | Scaffold       | t3m_contig_70_75_len_44364_read_count_3757474.10 |
| 2572232269 | t3m_00625 | Coordinates    | 7204..7848(+)                                    |
| 2572232269 | t3m_00625 | DNA_length     | 645bp                                            |
| 2572232269 | t3m_00625 | Protein_length | 214aa                                            |
| 2572232269 | t3m_00625 | GC             | 0.68                                             |
|            |           |                |                                                  |
| 2572232270 | t3m_00626 | Locus_type     | CDS                                              |
| 2572232270 | t3m_00626 | Product_name   | hypothetical protein                             |
| 2572232270 | t3m_00626 | Scaffold       | t3m_contig_70_75_len_44364_read_count_3757474.10 |
| 2572232270 | t3m_00626 | Coordinates    | 8279..8476(-)                                    |
| 2572232270 | t3m_00626 | DNA_length     | 198bp                                            |
| 2572232270 | t3m_00626 | Protein_length | 65aa                                             |
| 2572232270 | t3m_00626 | GC             | 0.62                                             |
|            |           |                |                                                  |
| 2572232271 | t3m_00627 | KEGG_module    | M00254: ABC-2 type transport system              |
| 2572232271 | t3m_00627 | COG_category   | [V] Defense mechanisms                           |

|            |           |                |                                                                    |          |
|------------|-----------|----------------|--------------------------------------------------------------------|----------|
| 2572232271 | t3m_00627 | COG1131        | ABC-type multidrug transport system, ATPase component              | 2.00E-55 |
| 2572232271 | t3m_00627 | pfam00005      | ABC_tran                                                           | 1.40E-20 |
| 2572232271 | t3m_00627 | KO:K01990      | ABC-2 type transport system ATP-binding protein                    | 0.00E+00 |
| 2572232271 | t3m_00627 | Locus_type     | CDS                                                                |          |
| 2572232271 | t3m_00627 | Product_name   | ABC-type multidrug transport system, ATPase component              |          |
| 2572232271 | t3m_00627 | Scaffold       | t3m_contig_70_75_len_44364_read_count_3757474.10                   |          |
| 2572232271 | t3m_00627 | Coordinates    | 9794..10702(+)                                                     |          |
| 2572232271 | t3m_00627 | DNA_length     | 909bp                                                              |          |
| 2572232271 | t3m_00627 | Protein_length | 302aa                                                              |          |
| 2572232271 | t3m_00627 | GC             |                                                                    | 0.58     |
| 2572232272 | t3m_00628 | COG_category   | [R] General function prediction only                               |          |
| 2572232272 | t3m_00628 | COG1277        | ABC-type transport system involved in multi-copper enzyme maturati | 4.00E-03 |
| 2572232272 | t3m_00628 | pfam12679      | ABC2_membrane_2                                                    | 1.80E-06 |
| 2572232272 | t3m_00628 | Locus_type     | CDS                                                                |          |
| 2572232272 | t3m_00628 | Product_name   | ABC-2 family transporter protein                                   |          |
| 2572232272 | t3m_00628 | Scaffold       | t3m_contig_70_75_len_44364_read_count_3757474.10                   |          |
| 2572232272 | t3m_00628 | Coordinates    | 11431..12195(+)                                                    |          |
| 2572232272 | t3m_00628 | DNA_length     | 765bp                                                              |          |
| 2572232272 | t3m_00628 | Protein_length | 254aa                                                              |          |
| 2572232272 | t3m_00628 | GC             |                                                                    | 0.6      |
| 2572232272 | t3m_00628 | Transmembrane  | Yes                                                                |          |
| 2572232273 | t3m_00629 | Locus_type     | CDS                                                                |          |
| 2572232273 | t3m_00629 | Product_name   | hypothetical protein                                               |          |
| 2572232273 | t3m_00629 | Scaffold       | t3m_contig_70_75_len_44364_read_count_3757474.10                   |          |
| 2572232273 | t3m_00629 | Coordinates    | 12211..12822(+)                                                    |          |
| 2572232273 | t3m_00629 | DNA_length     | 612bp                                                              |          |
| 2572232273 | t3m_00629 | Protein_length | 203aa                                                              |          |
| 2572232273 | t3m_00629 | GC             |                                                                    | 0.69     |
| 2572232274 | t3m_00630 | Locus_type     | CDS                                                                |          |
| 2572232274 | t3m_00630 | Product_name   | hypothetical protein                                               |          |
| 2572232274 | t3m_00630 | Scaffold       | t3m_contig_70_75_len_44364_read_count_3757474.10                   |          |

|            |           |                |                                                  |          |
|------------|-----------|----------------|--------------------------------------------------|----------|
| 2572232274 | t3m_00630 | Coordinates    | 13566..13745(-)                                  |          |
| 2572232274 | t3m_00630 | DNA_length     | 180bp                                            |          |
| 2572232274 | t3m_00630 | Protein_length | 59aa                                             |          |
| 2572232274 | t3m_00630 | GC             |                                                  | 0.61     |
| 2572232275 | t3m_00631 | COG_category   | [S] Function unknown                             |          |
| 2572232275 | t3m_00631 | COG3391        | Uncharacterized conserved protein                | 8.00E-14 |
| 2572232275 | t3m_00631 | pfam01436      | NHL                                              | 8.30E-05 |
| 2572232275 | t3m_00631 | TIGR02276      | 40-residue YVTN family beta-propeller repeat     | 6.20E-14 |
| 2572232275 | t3m_00631 | Locus_type     | CDS                                              |          |
| 2572232275 | t3m_00631 | Product_name   | 40-residue YVTN family beta-propeller repeat     |          |
| 2572232275 | t3m_00631 | Scaffold       | t3m_contig_70_75_len_44364_read_count_3757474.10 |          |
| 2572232275 | t3m_00631 | Coordinates    | 15435..16739(+)                                  |          |
| 2572232275 | t3m_00631 | DNA_length     | 1305bp                                           |          |
| 2572232275 | t3m_00631 | Protein_length | 434aa                                            |          |
| 2572232275 | t3m_00631 | GC             |                                                  | 0.61     |
| 2572232275 | t3m_00631 | Transmembrane  | Yes                                              |          |
| 2572232276 | t3m_00632 | Locus_type     | CDS                                              |          |
| 2572232276 | t3m_00632 | Product_name   | hypothetical protein                             |          |
| 2572232276 | t3m_00632 | Scaffold       | t3m_contig_70_75_len_44364_read_count_3757474.10 |          |
| 2572232276 | t3m_00632 | Coordinates    | 17035..17241(+)                                  |          |
| 2572232276 | t3m_00632 | DNA_length     | 207bp                                            |          |
| 2572232276 | t3m_00632 | Protein_length | 68aa                                             |          |
| 2572232276 | t3m_00632 | GC             |                                                  | 0.61     |
| 2572232277 | t3m_00633 | Locus_type     | CDS                                              |          |
| 2572232277 | t3m_00633 | Product_name   | hypothetical protein                             |          |
| 2572232277 | t3m_00633 | Scaffold       | t3m_contig_70_75_len_44364_read_count_3757474.10 |          |
| 2572232277 | t3m_00633 | Coordinates    | 18031..18450(+)                                  |          |
| 2572232277 | t3m_00633 | DNA_length     | 420bp                                            |          |
| 2572232277 | t3m_00633 | Protein_length | 139aa                                            |          |
| 2572232277 | t3m_00633 | GC             |                                                  | 0.57     |
| 2572232277 | t3m_00633 | Transmembrane  | Yes                                              |          |

|            |           |                |                                                            |          |
|------------|-----------|----------------|------------------------------------------------------------|----------|
| 2572232278 | t3m_00634 | Locus_type     | CDS                                                        |          |
| 2572232278 | t3m_00634 | Product_name   | hypothetical protein                                       |          |
| 2572232278 | t3m_00634 | Scaffold       | t3m_contig_70_75_len_44364_read_count_3757474.10           |          |
| 2572232278 | t3m_00634 | Coordinates    | 18460..18708(+)                                            |          |
| 2572232278 | t3m_00634 | DNA_length     | 249bp                                                      |          |
| 2572232278 | t3m_00634 | Protein_length | 82aa                                                       |          |
| 2572232278 | t3m_00634 | GC             |                                                            | 0.63     |
| 2572232278 | t3m_00634 | Transmembrane  | Yes                                                        |          |
|            |           |                |                                                            |          |
| 2572232279 | t3m_00635 | Locus_type     | CDS                                                        |          |
| 2572232279 | t3m_00635 | Product_name   | hypothetical protein                                       |          |
| 2572232279 | t3m_00635 | Scaffold       | t3m_contig_70_75_len_44364_read_count_3757474.10           |          |
| 2572232279 | t3m_00635 | Coordinates    | 19342..19917(+)                                            |          |
| 2572232279 | t3m_00635 | DNA_length     | 576bp                                                      |          |
| 2572232279 | t3m_00635 | Protein_length | 191aa                                                      |          |
| 2572232279 | t3m_00635 | GC             |                                                            | 0.64     |
|            |           |                |                                                            |          |
| 2572232280 | t3m_00636 | COG_category   | [R] General function prediction only                       |          |
| 2572232280 | t3m_00636 | COG3413        | Predicted DNA binding protein                              | 3.00E-09 |
| 2572232280 | t3m_00636 | pfam04967      | HTH_10                                                     | 1.30E-09 |
| 2572232280 | t3m_00636 | Locus_type     | CDS                                                        |          |
| 2572232280 | t3m_00636 | Product_name   | Predicted DNA binding protein                              |          |
| 2572232280 | t3m_00636 | Scaffold       | t3m_contig_70_75_len_44364_read_count_3757474.10           |          |
| 2572232280 | t3m_00636 | Coordinates    | 19980..20603(+)                                            |          |
| 2572232280 | t3m_00636 | DNA_length     | 624bp                                                      |          |
| 2572232280 | t3m_00636 | Protein_length | 207aa                                                      |          |
| 2572232280 | t3m_00636 | GC             |                                                            | 0.58     |
|            |           |                |                                                            |          |
| 2572232281 | t3m_00637 | COG_category   | [T] Signal transduction mechanisms                         |          |
| 2572232281 | t3m_00637 | COG0467        | RecA-superfamily ATPases implicated in signal transduction | 3.00E-11 |
| 2572232281 | t3m_00637 | pfam07088      | GvpD                                                       | 5.60E-22 |
| 2572232281 | t3m_00637 | Locus_type     | CDS                                                        |          |
| 2572232281 | t3m_00637 | Product_name   | RecA-superfamily ATPases implicated in signal transduction |          |

|            |           |                |                                                  |          |
|------------|-----------|----------------|--------------------------------------------------|----------|
| 2572232281 | t3m_00637 | Scaffold       | t3m_contig_70_75_len_44364_read_count_3757474.10 |          |
| 2572232281 | t3m_00637 | Coordinates    | 20695..22197(+)                                  |          |
| 2572232281 | t3m_00637 | DNA_length     | 1503bp                                           |          |
| 2572232281 | t3m_00637 | Protein_length | 500aa                                            |          |
| 2572232281 | t3m_00637 | GC             |                                                  | 0.61     |
|            |           |                |                                                  |          |
| 2572232282 | t3m_00638 | Locus_type     | CDS                                              |          |
| 2572232282 | t3m_00638 | Product_name   | hypothetical protein                             |          |
| 2572232282 | t3m_00638 | Scaffold       | t3m_contig_70_75_len_44364_read_count_3757474.10 |          |
| 2572232282 | t3m_00638 | Coordinates    | 22493..22672(-)                                  |          |
| 2572232282 | t3m_00638 | DNA_length     | 180bp                                            |          |
| 2572232282 | t3m_00638 | Protein_length | 59aa                                             |          |
| 2572232282 | t3m_00638 | GC             |                                                  | 0.56     |
|            |           |                |                                                  |          |
| 2572232283 | t3m_00639 | Locus_type     | tRNA                                             |          |
| 2572232283 | t3m_00639 | Product_name   | tRNA_Thr_TGT                                     |          |
| 2572232283 | t3m_00639 | Scaffold       | t3m_contig_70_75_len_44364_read_count_3757474.10 |          |
| 2572232283 | t3m_00639 | Coordinates    | 22940..23012(+)                                  |          |
| 2572232283 | t3m_00639 | DNA_length     | 73bp                                             |          |
| 2572232283 | t3m_00639 | GC             |                                                  | 0.58     |
|            |           |                |                                                  |          |
| 2572232284 | t3m_00640 | Locus_type     | CDS                                              |          |
| 2572232284 | t3m_00640 | Product_name   | hypothetical protein                             |          |
| 2572232284 | t3m_00640 | Scaffold       | t3m_contig_70_75_len_44364_read_count_3757474.10 |          |
| 2572232284 | t3m_00640 | Coordinates    | 23225..23449(+)                                  |          |
| 2572232284 | t3m_00640 | DNA_length     | 225bp                                            |          |
| 2572232284 | t3m_00640 | Protein_length | 74aa                                             |          |
| 2572232284 | t3m_00640 | GC             |                                                  | 0.61     |
| 2572232284 | t3m_00640 | Transmembrane  | Yes                                              |          |
|            |           |                |                                                  |          |
| 2572232285 | t3m_00641 | TIGR02537      | archaeal flagellin N-terminal-like domain        | 3.60E-08 |
| 2572232285 | t3m_00641 | Locus_type     | CDS                                              |          |
| 2572232285 | t3m_00641 | Product_name   | archaeal flagellin N-terminal-like domain        |          |
| 2572232285 | t3m_00641 | Scaffold       | t3m_contig_70_75_len_44364_read_count_3757474.10 |          |

|            |           |                |                                                                    |          |
|------------|-----------|----------------|--------------------------------------------------------------------|----------|
| 2572232285 | t3m_00641 | Coordinates    | 23579..24544(+)                                                    |          |
| 2572232285 | t3m_00641 | DNA_length     | 966bp                                                              |          |
| 2572232285 | t3m_00641 | Protein_length | 321aa                                                              |          |
| 2572232285 | t3m_00641 | GC             |                                                                    | 0.62     |
| 2572232285 | t3m_00641 | Transmembrane  | Yes                                                                |          |
| 2572232286 | t3m_00642 | Locus_type     | CDS                                                                |          |
| 2572232286 | t3m_00642 | Product_name   | hypothetical protein                                               |          |
| 2572232286 | t3m_00642 | Scaffold       | t3m_contig_70_75_len_44364_read_count_3757474.10                   |          |
| 2572232286 | t3m_00642 | Coordinates    | 24599..25099(+)                                                    |          |
| 2572232286 | t3m_00642 | DNA_length     | 501bp                                                              |          |
| 2572232286 | t3m_00642 | Protein_length | 166aa                                                              |          |
| 2572232286 | t3m_00642 | GC             |                                                                    | 0.62     |
| 2572232286 | t3m_00642 | Transmembrane  | Yes                                                                |          |
| 2572232287 | t3m_00643 | COG_category   | [O] Posttranslational modification, protein turnover, chaperones   |          |
| 2572232287 | t3m_00643 | COG1225        | Peroxiredoxin                                                      | 7.00E-39 |
| 2572232287 | t3m_00643 | pfam00578      | AhpC-TSA                                                           | 3.90E-35 |
| 2572232287 | t3m_00643 | EC:1.11.1.15   | Peroxiredoxin.                                                     |          |
| 2572232287 | t3m_00643 | KO:K03564      | peroxiredoxin Q/BCP [EC:1.11.1.15]                                 | 5.80E-31 |
| 2572232287 | t3m_00643 | Locus_type     | CDS                                                                |          |
| 2572232287 | t3m_00643 | Product_name   | Peroxiredoxin                                                      |          |
| 2572232287 | t3m_00643 | Scaffold       | t3m_contig_70_75_len_44364_read_count_3757474.10                   |          |
| 2572232287 | t3m_00643 | Coordinates    | 25225..25677(-)                                                    |          |
| 2572232287 | t3m_00643 | DNA_length     | 453bp                                                              |          |
| 2572232287 | t3m_00643 | Protein_length | 150aa                                                              |          |
| 2572232287 | t3m_00643 | GC             |                                                                    | 0.68     |
| 2572232288 | t3m_00644 | COG_category   | [C] Energy production and conversion                               |          |
| 2572232288 | t3m_00644 | COG0667        | Predicted oxidoreductases (related to aryl-alcohol dehydrogenases) | 7.00E-14 |
| 2572232288 | t3m_00644 | Locus_type     | CDS                                                                |          |
| 2572232288 | t3m_00644 | Product_name   | Predicted oxidoreductases (related to aryl-alcohol dehydrogenases) |          |
| 2572232288 | t3m_00644 | Scaffold       | t3m_contig_70_75_len_44364_read_count_3757474.10                   |          |
| 2572232288 | t3m_00644 | Coordinates    | 25698..26654(-)                                                    |          |

|            |           |                |                                                                  |          |
|------------|-----------|----------------|------------------------------------------------------------------|----------|
| 2572232288 | t3m_00644 | DNA_length     | 957bp                                                            |          |
| 2572232288 | t3m_00644 | Protein_length | 318aa                                                            |          |
| 2572232288 | t3m_00644 | GC             |                                                                  | 0.71     |
| 2572232289 | t3m_00645 | pfam00004      | AAA                                                              | 2.70E-12 |
| 2572232289 | t3m_00645 | Locus_type     | CDS                                                              |          |
| 2572232289 | t3m_00645 | Product_name   | ATPase family associated with various cellular activities (AAA)  |          |
| 2572232289 | t3m_00645 | Scaffold       | t3m_contig_70_75_len_44364_read_count_3757474.10                 |          |
| 2572232289 | t3m_00645 | Coordinates    | 26750..28456(+)                                                  |          |
| 2572232289 | t3m_00645 | DNA_length     | 1707bp                                                           |          |
| 2572232289 | t3m_00645 | Protein_length | 568aa                                                            |          |
| 2572232289 | t3m_00645 | GC             |                                                                  | 0.71     |
| 2572232290 | t3m_00646 | COG_category   | [O] Posttranslational modification, protein turnover, chaperones |          |
| 2572232290 | t3m_00646 | COG1764        | Predicted redox protein, regulator of disulfide bond formation   | 3.00E-16 |
| 2572232290 | t3m_00646 | pfam02566      | OsmC                                                             | 8.60E-19 |
| 2572232290 | t3m_00646 | TIGR03562      | peroxiredoxin, OsmC subfamily                                    | 3.40E-49 |
| 2572232290 | t3m_00646 | KO:K04063      | osmotically inducible protein OsmC                               | 2.20E-42 |
| 2572232290 | t3m_00646 | Locus_type     | CDS                                                              |          |
| 2572232290 | t3m_00646 | Product_name   | peroxiredoxin, OsmC subfamily                                    |          |
| 2572232290 | t3m_00646 | Scaffold       | t3m_contig_70_75_len_44364_read_count_3757474.10                 |          |
| 2572232290 | t3m_00646 | Coordinates    | 28478..28918(-)                                                  |          |
| 2572232290 | t3m_00646 | DNA_length     | 441bp                                                            |          |
| 2572232290 | t3m_00646 | Protein_length | 146aa                                                            |          |
| 2572232290 | t3m_00646 | GC             |                                                                  | 0.68     |
| 2572232291 | t3m_00647 | Locus_type     | CDS                                                              |          |
| 2572232291 | t3m_00647 | Product_name   | hypothetical protein                                             |          |
| 2572232291 | t3m_00647 | Scaffold       | t3m_contig_70_75_len_44364_read_count_3757474.10                 |          |
| 2572232291 | t3m_00647 | Coordinates    | 29008..29445(+)                                                  |          |
| 2572232291 | t3m_00647 | DNA_length     | 438bp                                                            |          |
| 2572232291 | t3m_00647 | Protein_length | 145aa                                                            |          |
| 2572232291 | t3m_00647 | GC             |                                                                  | 0.7      |

|            |           |                |                                                                   |          |
|------------|-----------|----------------|-------------------------------------------------------------------|----------|
| 2572232292 | t3m_00648 | COG_category   | [U] Intracellular trafficking, secretion, and vesicular transport |          |
| 2572232292 | t3m_00648 | COG2095        | Multiple antibiotic transporter                                   | 1.00E-34 |
| 2572232292 | t3m_00648 | pfam01914      | MarC                                                              | 1.20E-58 |
| 2572232292 | t3m_00648 | TIGR00427      | membrane protein, MarC family                                     | 2.00E-64 |
| 2572232292 | t3m_00648 | KO:K05595      | multiple antibiotic resistance protein                            | 5.40E-43 |
| 2572232292 | t3m_00648 | Locus_type     | CDS                                                               |          |
| 2572232292 | t3m_00648 | Product_name   | membrane protein, MarC family                                     |          |
| 2572232292 | t3m_00648 | Scaffold       | t3m_contig_70_75_len_44364_read_count_3757474.10                  |          |
| 2572232292 | t3m_00648 | Coordinates    | 29524..30159(+)                                                   |          |
| 2572232292 | t3m_00648 | DNA_length     | 636bp                                                             |          |
| 2572232292 | t3m_00648 | Protein_length | 211aa                                                             |          |
| 2572232292 | t3m_00648 | GC             |                                                                   | 0.67     |
| 2572232292 | t3m_00648 | Transmembrane  | Yes                                                               |          |
| 2572232293 | t3m_00649 | pfam07920      | DUF1684                                                           | 1.50E-43 |
| 2572232293 | t3m_00649 | KO:K09164      | hypothetical protein                                              | 8.70E-31 |
| 2572232293 | t3m_00649 | Locus_type     | CDS                                                               |          |
| 2572232293 | t3m_00649 | Product_name   | Protein of unknown function (DUF1684)                             |          |
| 2572232293 | t3m_00649 | Scaffold       | t3m_contig_70_75_len_44364_read_count_3757474.10                  |          |
| 2572232293 | t3m_00649 | Coordinates    | 30125..30805(-)                                                   |          |
| 2572232293 | t3m_00649 | DNA_length     | 681bp                                                             |          |
| 2572232293 | t3m_00649 | Protein_length | 226aa                                                             |          |
| 2572232293 | t3m_00649 | GC             |                                                                   | 0.68     |
| 2572232294 | t3m_00650 | COG_category   | [J] Translation, ribosomal structure and biogenesis               |          |
| 2572232294 | t3m_00650 | COG1670        | Acetyltransferases, including N-acetylases of ribosomal proteins  | 2.00E-10 |
| 2572232294 | t3m_00650 | pfam00583      | Acetyltransf_1                                                    | 1.10E-13 |
| 2572232294 | t3m_00650 | Locus_type     | CDS                                                               |          |
| 2572232294 | t3m_00650 | Product_name   | Acetyltransferases, including N-acetylases of ribosomal proteins  |          |
| 2572232294 | t3m_00650 | Scaffold       | t3m_contig_70_75_len_44364_read_count_3757474.10                  |          |
| 2572232294 | t3m_00650 | Coordinates    | 30831..31403(-)                                                   |          |
| 2572232294 | t3m_00650 | DNA_length     | 573bp                                                             |          |
| 2572232294 | t3m_00650 | Protein_length | 190aa                                                             |          |
| 2572232294 | t3m_00650 | GC             |                                                                   | 0.65     |



|            |           |                |                                                                  |          |
|------------|-----------|----------------|------------------------------------------------------------------|----------|
| 2572232295 | t3m_00651 | COG_category   | [J] Translation, ribosomal structure and biogenesis              |          |
| 2572232295 | t3m_00651 | COG1670        | Acetyltransferases, including N-acetylases of ribosomal proteins | 6.00E-11 |
| 2572232295 | t3m_00651 | pfam00583      | Acetyltransf_1                                                   | 7.80E-15 |
| 2572232295 | t3m_00651 | Locus_type     | CDS                                                              |          |
| 2572232295 | t3m_00651 | Product_name   | Acetyltransferases, including N-acetylases of ribosomal proteins |          |
| 2572232295 | t3m_00651 | Scaffold       | t3m_contig_70_75_len_44364_read_count_3757474.10                 |          |
| 2572232295 | t3m_00651 | Coordinates    | 31429..32001(-)                                                  |          |
| 2572232295 | t3m_00651 | DNA_length     | 573bp                                                            |          |
| 2572232295 | t3m_00651 | Protein_length | 190aa                                                            |          |
| 2572232295 | t3m_00651 | GC             |                                                                  | 0.65     |
|            |           |                |                                                                  |          |
| 2572232296 | t3m_00652 | COG_category   | [R] General function prediction only                             |          |
| 2572232296 | t3m_00652 | COG2151        | Predicted metal-sulfur cluster biosynthetic enzyme               | 5.00E-26 |
| 2572232296 | t3m_00652 | pfam01883      | DUF59                                                            | 1.40E-12 |
| 2572232296 | t3m_00652 | Locus_type     | CDS                                                              |          |
| 2572232296 | t3m_00652 | Product_name   | Predicted metal-sulfur cluster biosynthetic enzyme               |          |
| 2572232296 | t3m_00652 | Scaffold       | t3m_contig_70_75_len_44364_read_count_3757474.10                 |          |
| 2572232296 | t3m_00652 | Coordinates    | 32029..32406(-)                                                  |          |
| 2572232296 | t3m_00652 | DNA_length     | 378bp                                                            |          |
| 2572232296 | t3m_00652 | Protein_length | 125aa                                                            |          |
| 2572232296 | t3m_00652 | GC             |                                                                  | 0.66     |
|            |           |                |                                                                  |          |
| 2572232297 | t3m_00653 | COG_category   | [S] Function unknown                                             |          |
| 2572232297 | t3m_00653 | COG1469        | Uncharacterized conserved protein                                | 1.00E-56 |
| 2572232297 | t3m_00653 | pfam02649      | GCHY-1                                                           | 1.50E-60 |
| 2572232297 | t3m_00653 | TIGR00294      | GTP cyclohydrolase, MptA/FolE2 family                            | 6.90E-64 |
| 2572232297 | t3m_00653 | KO:K09007      | hypothetical protein                                             | 0.00E+00 |
| 2572232297 | t3m_00653 | Locus_type     | CDS                                                              |          |
| 2572232297 | t3m_00653 | Product_name   | GTP cyclohydrolase, MptA/FolE2 family                            |          |
| 2572232297 | t3m_00653 | Scaffold       | t3m_contig_70_75_len_44364_read_count_3757474.10                 |          |
| 2572232297 | t3m_00653 | Coordinates    | 32510..33418(+)                                                  |          |
| 2572232297 | t3m_00653 | DNA_length     | 909bp                                                            |          |
| 2572232297 | t3m_00653 | Protein_length | 302aa                                                            |          |

|            |           |                |                                                                         |          |
|------------|-----------|----------------|-------------------------------------------------------------------------|----------|
| 2572232297 | t3m_00653 | GC             |                                                                         | 0.68     |
| 2572232298 | t3m_00654 | pfam02687      | FtsX                                                                    | 1.80E-15 |
| 2572232298 | t3m_00654 | pfam12704      | MacB_PCD                                                                | 1.10E-08 |
| 2572232298 | t3m_00654 | Locus_type     | CDS                                                                     |          |
| 2572232298 | t3m_00654 | Product_name   | MacB-like periplasmic core domain/FtsX-like permease family             |          |
| 2572232298 | t3m_00654 | Scaffold       | t3m_contig_70_75_len_44364_read_count_3757474.10                        |          |
| 2572232298 | t3m_00654 | Coordinates    | 33485..34732(+)                                                         |          |
| 2572232298 | t3m_00654 | DNA_length     | 1248bp                                                                  |          |
| 2572232298 | t3m_00654 | Protein_length | 415aa                                                                   |          |
| 2572232298 | t3m_00654 | GC             |                                                                         | 0.68     |
| 2572232298 | t3m_00654 | Transmembrane  | Yes                                                                     |          |
| 2572232299 | t3m_00655 | COG_category   | [M] Cell wall/membrane/envelope biogenesis                              |          |
| 2572232299 | t3m_00655 | COG4591        | ABC-type transport system, involved in lipoprotein release, permease c  | 5.00E-15 |
| 2572232299 | t3m_00655 | pfam12704      | MacB_PCD                                                                | 1.10E-12 |
| 2572232299 | t3m_00655 | pfam02687      | FtsX                                                                    | 1.30E-12 |
| 2572232299 | t3m_00655 | Locus_type     | CDS                                                                     |          |
| 2572232299 | t3m_00655 | Product_name   | ABC-type transport system, involved in lipoprotein release, permease co |          |
| 2572232299 | t3m_00655 | Scaffold       | t3m_contig_70_75_len_44364_read_count_3757474.10                        |          |
| 2572232299 | t3m_00655 | Coordinates    | 34732..35970(+)                                                         |          |
| 2572232299 | t3m_00655 | DNA_length     | 1239bp                                                                  |          |
| 2572232299 | t3m_00655 | Protein_length | 412aa                                                                   |          |
| 2572232299 | t3m_00655 | GC             |                                                                         | 0.7      |
| 2572232299 | t3m_00655 | Transmembrane  | Yes                                                                     |          |
| 2572232300 | t3m_00656 | KEGG_module    | M00258: Putative ABC transport system                                   |          |
| 2572232300 | t3m_00656 | COG_category   | [V] Defense mechanisms                                                  |          |
| 2572232300 | t3m_00656 | COG1136        | ABC-type antimicrobial peptide transport system, ATPase component       | 3.00E-74 |
| 2572232300 | t3m_00656 | pfam00005      | ABC_tran                                                                | 2.80E-31 |
| 2572232300 | t3m_00656 | KO:K02003      | putative ABC transport system ATP-binding protein                       | 0.00E+00 |
| 2572232300 | t3m_00656 | Locus_type     | CDS                                                                     |          |
| 2572232300 | t3m_00656 | Product_name   | ABC-type antimicrobial peptide transport system, ATPase component       |          |
| 2572232300 | t3m_00656 | Scaffold       | t3m_contig_70_75_len_44364_read_count_3757474.10                        |          |

|            |           |                |                                                                       |          |
|------------|-----------|----------------|-----------------------------------------------------------------------|----------|
| 2572232300 | t3m_00656 | Coordinates    | 35967..36671(+)                                                       |          |
| 2572232300 | t3m_00656 | DNA_length     | 705bp                                                                 |          |
| 2572232300 | t3m_00656 | Protein_length | 234aa                                                                 |          |
| 2572232300 | t3m_00656 | GC             |                                                                       | 0.72     |
| 2572232301 | t3m_00657 | COG_category   | [R] General function prediction only                                  |          |
| 2572232301 | t3m_00657 | COG1245        | Predicted ATPase, RNase L inhibitor (RLI) homolog                     | 0.00E+00 |
| 2572232301 | t3m_00657 | pfam04068      | RLI                                                                   | 4.70E-08 |
| 2572232301 | t3m_00657 | pfam00037      | Fer4                                                                  | 1.30E-08 |
| 2572232301 | t3m_00657 | pfam00005      | ABC_tran                                                              | 3.50E-13 |
| 2572232301 | t3m_00657 | pfam00005      | ABC_tran                                                              | 1.30E-15 |
| 2572232301 | t3m_00657 | KO:K06174      | ATP-binding cassette, sub-family E, member 1                          | 0.00E+00 |
| 2572232301 | t3m_00657 | Locus_type     | CDS                                                                   |          |
| 2572232301 | t3m_00657 | Product_name   | Predicted ATPase, RNase L inhibitor (RLI) homolog                     |          |
| 2572232301 | t3m_00657 | Scaffold       | t3m_contig_70_75_len_44364_read_count_3757474.10                      |          |
| 2572232301 | t3m_00657 | Coordinates    | 36682..38460(+)                                                       |          |
| 2572232301 | t3m_00657 | DNA_length     | 1779bp                                                                |          |
| 2572232301 | t3m_00657 | Protein_length | 592aa                                                                 |          |
| 2572232301 | t3m_00657 | GC             |                                                                       | 0.68     |
| 2572232302 | t3m_00658 | pfam10882      | bPH_5                                                                 | 2.50E-06 |
| 2572232302 | t3m_00658 | Locus_type     | CDS                                                                   |          |
| 2572232302 | t3m_00658 | Product_name   | Bacterial PH domain                                                   |          |
| 2572232302 | t3m_00658 | Scaffold       | t3m_contig_70_75_len_44364_read_count_3757474.10                      |          |
| 2572232302 | t3m_00658 | Coordinates    | 38513..39055(+)                                                       |          |
| 2572232302 | t3m_00658 | DNA_length     | 543bp                                                                 |          |
| 2572232302 | t3m_00658 | Protein_length | 180aa                                                                 |          |
| 2572232302 | t3m_00658 | GC             |                                                                       | 0.64     |
| 2572232302 | t3m_00658 | Transmembrane  | Yes                                                                   |          |
| 2572232303 | t3m_00659 | COG_category   | [H] Coenzyme transport and metabolism                                 |          |
| 2572232303 | t3m_00659 | COG0476        | Dinucleotide-utilizing enzymes involved in molybdopterin and thiamine | 4.00E-75 |
| 2572232303 | t3m_00659 | pfam02597      | ThiS                                                                  | 1.40E-07 |
| 2572232303 | t3m_00659 | pfam05237      | MoeZ_MoeB                                                             | 8.20E-31 |

|            |           |                |                                                                         |          |
|------------|-----------|----------------|-------------------------------------------------------------------------|----------|
| 2572232303 | t3m_00659 | pfam00899      | ThiF                                                                    | 4.50E-43 |
| 2572232303 | t3m_00659 | pfam00581      | Rhodanese                                                               | 6.30E-16 |
| 2572232303 | t3m_00659 | KO:K11996      | adenylyltransferase and sulfurtransferase                               | 0.00E+00 |
| 2572232303 | t3m_00659 | Locus_type     | CDS                                                                     |          |
| 2572232303 | t3m_00659 | Product_name   | Dinucleotide-utilizing enzymes involved in molybdopterin and thiamine I |          |
| 2572232303 | t3m_00659 | Scaffold       | t3m_contig_70_75_len_44364_read_count_3757474.10                        |          |
| 2572232303 | t3m_00659 | Coordinates    | 39079..40473(-)                                                         |          |
| 2572232303 | t3m_00659 | DNA_length     | 1395bp                                                                  |          |
| 2572232303 | t3m_00659 | Protein_length | 464aa                                                                   |          |
| 2572232303 | t3m_00659 | GC             |                                                                         | 0.69     |
| 2572232303 | t3m_00659 | Transmembrane  | Yes                                                                     |          |
| 2572232304 | t3m_00660 | Locus_type     | CDS                                                                     |          |
| 2572232304 | t3m_00660 | Product_name   | hypothetical protein                                                    |          |
| 2572232304 | t3m_00660 | Scaffold       | t3m_contig_70_75_len_44364_read_count_3757474.10                        |          |
| 2572232304 | t3m_00660 | Coordinates    | 40429..41079(+)                                                         |          |
| 2572232304 | t3m_00660 | DNA_length     | 651bp                                                                   |          |
| 2572232304 | t3m_00660 | Protein_length | 216aa                                                                   |          |
| 2572232304 | t3m_00660 | GC             |                                                                         | 0.67     |
| 2572232305 | t3m_00661 | COG_category   | [K] Transcription                                                       |          |
| 2572232305 | t3m_00661 | COG2345        | Predicted transcriptional regulator                                     | 7.00E-25 |
| 2572232305 | t3m_00661 | pfam12802      | MarR_2                                                                  | 1.80E-06 |
| 2572232305 | t3m_00661 | ITERM:02250    | transcriptional regulator                                               |          |
| 2572232305 | t3m_00661 | Locus_type     | CDS                                                                     |          |
| 2572232305 | t3m_00661 | Product_name   | transcriptional regulator                                               |          |
| 2572232305 | t3m_00661 | Scaffold       | t3m_contig_70_75_len_44364_read_count_3757474.10                        |          |
| 2572232305 | t3m_00661 | Coordinates    | 41154..41795(-)                                                         |          |
| 2572232305 | t3m_00661 | DNA_length     | 642bp                                                                   |          |
| 2572232305 | t3m_00661 | Protein_length | 213aa                                                                   |          |
| 2572232305 | t3m_00661 | GC             |                                                                         | 0.69     |
| 2572232306 | t3m_00662 | COG_category   | [O] Posttranslational modification, protein turnover, chaperones        |          |
| 2572232306 | t3m_00662 | COG0396        | ABC-type transport system involved in Fe-S cluster assembly, ATPase co  | 2.00E-92 |

|            |           |                |                                                                   |           |
|------------|-----------|----------------|-------------------------------------------------------------------|-----------|
| 2572232306 | t3m_00662 | pfam00005      | ABC_tran                                                          | 2.60E-21  |
| 2572232306 | t3m_00662 | TIGR01978      | FeS assembly ATPase SufC                                          | 2.50E-101 |
| 2572232306 | t3m_00662 | KO:K09013      | Fe-S cluster assembly ATP-binding protein                         | 0.00E+00  |
| 2572232306 | t3m_00662 | Locus_type     | CDS                                                               |           |
| 2572232306 | t3m_00662 | Product_name   | FeS assembly ATPase SufC                                          |           |
| 2572232306 | t3m_00662 | Scaffold       | t3m_contig_70_75_len_44364_read_count_3757474.10                  |           |
| 2572232306 | t3m_00662 | Coordinates    | 41878..42660(+)                                                   |           |
| 2572232306 | t3m_00662 | DNA_length     | 783bp                                                             |           |
| 2572232306 | t3m_00662 | Protein_length | 260aa                                                             |           |
| 2572232306 | t3m_00662 | GC             |                                                                   | 0.64      |
| 2572232307 | t3m_00663 | Metacyc        | PWY-6891: thiazole biosynthesis II (Bacillus)                     |           |
| 2572232307 | t3m_00663 | Metacyc        | PWY-6823: molybdenum cofactor biosynthesis                        |           |
| 2572232307 | t3m_00663 | Metacyc        | PWY0-1021: alanine biosynthesis III                               |           |
| 2572232307 | t3m_00663 | Metacyc        | PWY-6892: thiazole biosynthesis I (E. coli)                       |           |
| 2572232307 | t3m_00663 | COG_category   | [E] Amino acid transport and metabolism                           |           |
| 2572232307 | t3m_00663 | COG0520        | Selenocysteine lyase                                              | 5.00E-129 |
| 2572232307 | t3m_00663 | pfam00266      | Aminotran_5                                                       | 0.00E+00  |
| 2572232307 | t3m_00663 | EC:2.8.1.7     | Cysteine desulfurase.                                             |           |
| 2572232307 | t3m_00663 | EC:4.4.1.16    | Selenocysteine lyase.                                             |           |
| 2572232307 | t3m_00663 | TIGR01979      | cysteine desulfurases, SufSfamily                                 | 0.00E+00  |
| 2572232307 | t3m_00663 | KO:K11717      | cysteine desulfurase / selenocysteine lyase [EC:2.8.1.7 4.4.1.16] | 0.00E+00  |
| 2572232307 | t3m_00663 | Locus_type     | CDS                                                               |           |
| 2572232307 | t3m_00663 | Product_name   | cysteine desulfurases, SufSfamily                                 |           |
| 2572232307 | t3m_00663 | Scaffold       | t3m_contig_70_75_len_44364_read_count_3757474.10                  |           |
| 2572232307 | t3m_00663 | Coordinates    | 42690..43943(+)                                                   |           |
| 2572232307 | t3m_00663 | DNA_length     | 1254bp                                                            |           |
| 2572232307 | t3m_00663 | Protein_length | 417aa                                                             |           |
| 2572232307 | t3m_00663 | GC             |                                                                   | 0.68      |
| 2572232308 | t3m_00664 | Locus_type     | CDS                                                               |           |
| 2572232308 | t3m_00664 | Product_name   | hypothetical protein                                              |           |
| 2572232308 | t3m_00664 | Scaffold       | t3m_contig_70_75_len_44364_read_count_3757474.10                  |           |
| 2572232308 | t3m_00664 | Coordinates    | 44104..44361(+)                                                   |           |

|            |           |                |                                                                        |          |
|------------|-----------|----------------|------------------------------------------------------------------------|----------|
| 2572232308 | t3m_00664 | DNA_length     | 258bp                                                                  |          |
| 2572232308 | t3m_00664 | Protein_length | 86aa                                                                   |          |
| 2572232308 | t3m_00664 | GC             |                                                                        | 0.61     |
| 2572232309 | t3m_00665 | Locus_type     | CDS                                                                    |          |
| 2572232309 | t3m_00665 | Product_name   | hypothetical protein                                                   |          |
| 2572232309 | t3m_00665 | Scaffold       | t3m_contig_70_80_len_43488_read_count_3312166.11                       |          |
| 2572232309 | t3m_00665 | Coordinates    | 3..353(-)                                                              |          |
| 2572232309 | t3m_00665 | DNA_length     | 351bp                                                                  |          |
| 2572232309 | t3m_00665 | Protein_length | 117aa                                                                  |          |
| 2572232309 | t3m_00665 | GC             |                                                                        | 0.65     |
| 2572232309 | t3m_00665 | Transmembrane  | Yes                                                                    |          |
| 2572232310 | t3m_00666 | KEGG_module    | M00048: Inosine monophosphate biosynthesis, PRPP + glutamine => IMP    |          |
| 2572232310 | t3m_00666 | Metacyc        | PWY-6123: inosine-5'-phosphate biosynthesis I                          |          |
| 2572232310 | t3m_00666 | Metacyc        | PWY-6124: inosine-5'-phosphate biosynthesis II                         |          |
| 2572232310 | t3m_00666 | COG_category   | [F] Nucleotide transport and metabolism                                |          |
| 2572232310 | t3m_00666 | COG0138        | AICAR transformylase/IMP cyclohydrolase PurH (only IMP cyclohydrolase) | 0.00E+00 |
| 2572232310 | t3m_00666 | pfam01808      | AICARFT_IMPCHas                                                        | 2.40E-76 |
| 2572232310 | t3m_00666 | pfam02142      | MGS                                                                    | 5.90E-10 |
| 2572232310 | t3m_00666 | EC:3.5.4.10    | IMP cyclohydrolase.                                                    |          |
| 2572232310 | t3m_00666 | EC:2.1.2.3     | Phosphoribosylaminoimidazolecarboxamide formyltransferase.             |          |
| 2572232310 | t3m_00666 | KO:K00602      | phosphoribosylaminoimidazolecarboxamide formyltransferase / IMP cy     | 0.00E+00 |
| 2572232310 | t3m_00666 | Locus_type     | CDS                                                                    |          |
| 2572232310 | t3m_00666 | Product_name   | AICAR transformylase/IMP cyclohydrolase PurH (only IMP cyclohydrolase) |          |
| 2572232310 | t3m_00666 | Scaffold       | t3m_contig_70_80_len_43488_read_count_3312166.11                       |          |
| 2572232310 | t3m_00666 | Coordinates    | 629..2197(+)                                                           |          |
| 2572232310 | t3m_00666 | DNA_length     | 1569bp                                                                 |          |
| 2572232310 | t3m_00666 | Protein_length | 522aa                                                                  |          |
| 2572232310 | t3m_00666 | GC             |                                                                        | 0.71     |
| 2572232311 | t3m_00667 | IMG_pathway    | 964: DsbC-DsbD disulfide-isomerizing reductive system                  |          |
| 2572232311 | t3m_00667 | pfam00085      | Thioredoxin                                                            | 8.20E-23 |
| 2572232311 | t3m_00667 | TIGR01068      | thioredoxin                                                            | 2.20E-30 |

|            |           |                |                                                  |          |
|------------|-----------|----------------|--------------------------------------------------|----------|
| 2572232311 | t3m_00667 | KO:K03671      | thioredoxin 1                                    | 1.40E-21 |
| 2572232311 | t3m_00667 | ITERM:01894    | thioredoxin                                      |          |
| 2572232311 | t3m_00667 | Locus_type     | CDS                                              |          |
| 2572232311 | t3m_00667 | Product_name   | thioredoxin                                      |          |
| 2572232311 | t3m_00667 | Scaffold       | t3m_contig_70_80_len_43488_read_count_3312166.11 |          |
| 2572232311 | t3m_00667 | Coordinates    | 2169..2540(-)                                    |          |
| 2572232311 | t3m_00667 | DNA_length     | 372bp                                            |          |
| 2572232311 | t3m_00667 | Protein_length | 123aa                                            |          |
| 2572232311 | t3m_00667 | GC             |                                                  | 0.68     |
|            |           |                |                                                  |          |
| 2572232312 | t3m_00668 | Locus_type     | CDS                                              |          |
| 2572232312 | t3m_00668 | Product_name   | hypothetical protein                             |          |
| 2572232312 | t3m_00668 | Scaffold       | t3m_contig_70_80_len_43488_read_count_3312166.11 |          |
| 2572232312 | t3m_00668 | Coordinates    | 2568..3257(-)                                    |          |
| 2572232312 | t3m_00668 | DNA_length     | 690bp                                            |          |
| 2572232312 | t3m_00668 | Protein_length | 229aa                                            |          |
| 2572232312 | t3m_00668 | GC             |                                                  | 0.74     |
|            |           |                |                                                  |          |
| 2572232313 | t3m_00669 | Locus_type     | CDS                                              |          |
| 2572232313 | t3m_00669 | Product_name   | hypothetical protein                             |          |
| 2572232313 | t3m_00669 | Scaffold       | t3m_contig_70_80_len_43488_read_count_3312166.11 |          |
| 2572232313 | t3m_00669 | Coordinates    | 3390..3569(-)                                    |          |
| 2572232313 | t3m_00669 | DNA_length     | 180bp                                            |          |
| 2572232313 | t3m_00669 | Protein_length | 59aa                                             |          |
| 2572232313 | t3m_00669 | GC             |                                                  | 0.71     |
|            |           |                |                                                  |          |
| 2572232314 | t3m_00670 | KEGG_module    | M00532: Photorespiration                         |          |
| 2572232314 | t3m_00670 | COG_category   | [C] Energy production and conversion             |          |
| 2572232314 | t3m_00670 | COG0277        | FAD/FMN-containing dehydrogenases                | 2.00E-73 |
| 2572232314 | t3m_00670 | pfam02913      | FAD-oxidase_C                                    | 1.10E-39 |
| 2572232314 | t3m_00670 | pfam01565      | FAD_binding_4                                    | 3.00E-40 |
| 2572232314 | t3m_00670 | EC:1.1.3.15    | (S)-2-hydroxy-acid oxidase.                      |          |
| 2572232314 | t3m_00670 | KO:K00104      | glycolate oxidase [EC:1.1.3.15]                  | 0.00E+00 |
| 2572232314 | t3m_00670 | Locus_type     | CDS                                              |          |

|            |           |                |                                                  |          |
|------------|-----------|----------------|--------------------------------------------------|----------|
| 2572232314 | t3m_00670 | Product_name   | FAD/FMN-containing dehydrogenases                |          |
| 2572232314 | t3m_00670 | Scaffold       | t3m_contig_70_80_len_43488_read_count_3312166.11 |          |
| 2572232314 | t3m_00670 | Coordinates    | 3538..5064(-)                                    |          |
| 2572232314 | t3m_00670 | DNA_length     | 1527bp                                           |          |
| 2572232314 | t3m_00670 | Protein_length | 508aa                                            |          |
| 2572232314 | t3m_00670 | GC             |                                                  | 0.72     |
|            |           |                |                                                  |          |
| 2572232315 | t3m_00671 | Locus_type     | CDS                                              |          |
| 2572232315 | t3m_00671 | Product_name   | hypothetical protein                             |          |
| 2572232315 | t3m_00671 | Scaffold       | t3m_contig_70_80_len_43488_read_count_3312166.11 |          |
| 2572232315 | t3m_00671 | Coordinates    | 5088..5549(-)                                    |          |
| 2572232315 | t3m_00671 | DNA_length     | 462bp                                            |          |
| 2572232315 | t3m_00671 | Protein_length | 153aa                                            |          |
| 2572232315 | t3m_00671 | GC             |                                                  | 0.69     |
|            |           |                |                                                  |          |
| 2572232316 | t3m_00672 | Locus_type     | CDS                                              |          |
| 2572232316 | t3m_00672 | Product_name   | hypothetical protein                             |          |
| 2572232316 | t3m_00672 | Scaffold       | t3m_contig_70_80_len_43488_read_count_3312166.11 |          |
| 2572232316 | t3m_00672 | Coordinates    | 5843..6514(+)                                    |          |
| 2572232316 | t3m_00672 | DNA_length     | 672bp                                            |          |
| 2572232316 | t3m_00672 | Protein_length | 223aa                                            |          |
| 2572232316 | t3m_00672 | GC             |                                                  | 0.73     |
|            |           |                |                                                  |          |
| 2572232317 | t3m_00673 | Metacyc        | PWY-6854: ethylene biosynthesis III (microbes)   |          |
| 2572232317 | t3m_00673 | Metacyc        | DETOX1-PWY: superoxide radicals degradation      |          |
| 2572232317 | t3m_00673 | pfam09055      | Sod_Ni                                           | 1.10E-44 |
| 2572232317 | t3m_00673 | EC:1.15.1.1    | Superoxide dismutase.                            |          |
| 2572232317 | t3m_00673 | TIGR02753      | superoxide dismutase, Ni                         | 1.60E-49 |
| 2572232317 | t3m_00673 | KO:K00518      | nickel superoxide dismutase [EC:1.15.1.1]        | 4.70E-33 |
| 2572232317 | t3m_00673 | Locus_type     | CDS                                              |          |
| 2572232317 | t3m_00673 | Product_name   | superoxide dismutase, Ni                         |          |
| 2572232317 | t3m_00673 | Scaffold       | t3m_contig_70_80_len_43488_read_count_3312166.11 |          |
| 2572232317 | t3m_00673 | Coordinates    | 6568..7071(-)                                    |          |
| 2572232317 | t3m_00673 | DNA_length     | 504bp                                            |          |



|            |           |                |                                                                  |          |
|------------|-----------|----------------|------------------------------------------------------------------|----------|
| 2572232317 | t3m_00673 | Protein_length | 167aa                                                            |          |
| 2572232317 | t3m_00673 | GC             |                                                                  | 0.65     |
| 2572232318 | t3m_00674 | pfam00717      | Peptidase_S24                                                    | 6.20E-11 |
| 2572232318 | t3m_00674 | TIGR02754      | nickel-type superoxide dismutase maturation protease             | 6.00E-23 |
| 2572232318 | t3m_00674 | Locus_type     | CDS                                                              |          |
| 2572232318 | t3m_00674 | Product_name   | nickel-type superoxide dismutase maturation protease             |          |
| 2572232318 | t3m_00674 | Scaffold       | t3m_contig_70_80_len_43488_read_count_3312166.11                 |          |
| 2572232318 | t3m_00674 | Coordinates    | 7212..7520(+)                                                    |          |
| 2572232318 | t3m_00674 | DNA_length     | 309bp                                                            |          |
| 2572232318 | t3m_00674 | Protein_length | 102aa                                                            |          |
| 2572232318 | t3m_00674 | GC             |                                                                  | 0.72     |
| 2572232319 | t3m_00675 | COG_category   | [P] Inorganic ion transport and metabolism                       |          |
| 2572232319 | t3m_00675 | COG0725        | ABC-type molybdate transport system, periplasmic component       | 4.00E-08 |
| 2572232319 | t3m_00675 | pfam13531      | SBP_bac_11                                                       | 3.00E-17 |
| 2572232319 | t3m_00675 | Locus_type     | CDS                                                              |          |
| 2572232319 | t3m_00675 | Product_name   | ABC-type molybdate transport system, periplasmic component       |          |
| 2572232319 | t3m_00675 | Scaffold       | t3m_contig_70_80_len_43488_read_count_3312166.11                 |          |
| 2572232319 | t3m_00675 | Coordinates    | 7600..8679(+)                                                    |          |
| 2572232319 | t3m_00675 | DNA_length     | 1080bp                                                           |          |
| 2572232319 | t3m_00675 | Protein_length | 359aa                                                            |          |
| 2572232319 | t3m_00675 | GC             |                                                                  | 0.68     |
| 2572232319 | t3m_00675 | Transmembrane  | Yes                                                              |          |
| 2572232320 | t3m_00676 | KEGG_module    | M00423: Molybdate/tungstate transport system                     |          |
| 2572232320 | t3m_00676 | COG_category   | [O] Posttranslational modification, protein turnover, chaperones |          |
| 2572232320 | t3m_00676 | COG0555        | ABC-type sulfate transport system, permease component            | 9.00E-40 |
| 2572232320 | t3m_00676 | pfam00528      | BPD_transp_1                                                     | 1.80E-13 |
| 2572232320 | t3m_00676 | KO:K15496      | molybdate/tungstate transport system permease protein            | 2.60E-42 |
| 2572232320 | t3m_00676 | Locus_type     | CDS                                                              |          |
| 2572232320 | t3m_00676 | Product_name   | ABC-type sulfate transport system, permease component            |          |
| 2572232320 | t3m_00676 | Scaffold       | t3m_contig_70_80_len_43488_read_count_3312166.11                 |          |
| 2572232320 | t3m_00676 | Coordinates    | 8676..9551(+)                                                    |          |

|            |           |                |                                                                        |          |
|------------|-----------|----------------|------------------------------------------------------------------------|----------|
| 2572232320 | t3m_00676 | DNA_length     | 876bp                                                                  |          |
| 2572232320 | t3m_00676 | Protein_length | 291aa                                                                  |          |
| 2572232320 | t3m_00676 | GC             |                                                                        | 0.71     |
| 2572232320 | t3m_00676 | Transmembrane  | Yes                                                                    |          |
| 2572232321 | t3m_00677 | KEGG_module    | M00189: Molybdate transport system                                     |          |
| 2572232321 | t3m_00677 | COG_category   | [E] Amino acid transport and metabolism                                |          |
| 2572232321 | t3m_00677 | COG3842        | ABC-type spermidine/putrescine transport systems, ATPase component     | 2.00E-58 |
| 2572232321 | t3m_00677 | pfam00005      | ABC_tran                                                               | 1.80E-28 |
| 2572232321 | t3m_00677 | EC:3.6.3.29    | Molybdate-transporting ATPase.                                         |          |
| 2572232321 | t3m_00677 | KO:K02017      | molybdate transport system ATP-binding protein [EC:3.6.3.29]           | 0.00E+00 |
| 2572232321 | t3m_00677 | Locus_type     | CDS                                                                    |          |
| 2572232321 | t3m_00677 | Product_name   | ABC-type spermidine/putrescine transport systems, ATPase component:    |          |
| 2572232321 | t3m_00677 | Scaffold       | t3m_contig_70_80_len_43488_read_count_3312166.11                       |          |
| 2572232321 | t3m_00677 | Coordinates    | 9515..10594(+)                                                         |          |
| 2572232321 | t3m_00677 | DNA_length     | 1080bp                                                                 |          |
| 2572232321 | t3m_00677 | Protein_length | 359aa                                                                  |          |
| 2572232321 | t3m_00677 | GC             |                                                                        | 0.73     |
| 2572232322 | t3m_00678 | pfam03459      | TOBE                                                                   | 2.10E-10 |
| 2572232322 | t3m_00678 | pfam00126      | HTH_1                                                                  | 2.50E-05 |
| 2572232322 | t3m_00678 | TIGR00638      | molybdenum-pterin binding domain                                       | 2.80E-13 |
| 2572232322 | t3m_00678 | TIGR00637      | ModE molybdate transport repressor domain                              | 5.40E-14 |
| 2572232322 | t3m_00678 | KO:K02019      | molybdate transport system regulatory protein                          | 4.80E-13 |
| 2572232322 | t3m_00678 | Locus_type     | CDS                                                                    |          |
| 2572232322 | t3m_00678 | Product_name   | Bacterial regulatory helix-turn-helix protein, lysR family/TOBE domain |          |
| 2572232322 | t3m_00678 | Scaffold       | t3m_contig_70_80_len_43488_read_count_3312166.11                       |          |
| 2572232322 | t3m_00678 | Coordinates    | 10591..11274(+)                                                        |          |
| 2572232322 | t3m_00678 | DNA_length     | 684bp                                                                  |          |
| 2572232322 | t3m_00678 | Protein_length | 227aa                                                                  |          |
| 2572232322 | t3m_00678 | GC             |                                                                        | 0.73     |
| 2572232323 | t3m_00679 | COG_category   | [L] Replication, recombination and repair                              |          |
| 2572232323 | t3m_00679 | COG0468        | RecA/RadA recombinase                                                  | 8.00E-69 |

|            |           |                |                                                                     |          |
|------------|-----------|----------------|---------------------------------------------------------------------|----------|
| 2572232323 | t3m_00679 | pfam08423      | Rad51                                                               | 6.80E-92 |
| 2572232323 | t3m_00679 | pfam14520      | HHH_5                                                               | 4.10E-07 |
| 2572232323 | t3m_00679 | TIGR02236      | DNA repair and recombination protein RadA                           | 0.00E+00 |
| 2572232323 | t3m_00679 | KO:K04483      | DNA repair protein RadA                                             | 0.00E+00 |
| 2572232323 | t3m_00679 | Locus_type     | CDS                                                                 |          |
| 2572232323 | t3m_00679 | Product_name   | DNA repair and recombination protein RadA                           |          |
| 2572232323 | t3m_00679 | Scaffold       | t3m_contig_70_80_len_43488_read_count_3312166.11                    |          |
| 2572232323 | t3m_00679 | Coordinates    | 11249..12247(-)                                                     |          |
| 2572232323 | t3m_00679 | DNA_length     | 999bp                                                               |          |
| 2572232323 | t3m_00679 | Protein_length | 332aa                                                               |          |
| 2572232323 | t3m_00679 | GC             |                                                                     | 0.69     |
| 2572232324 | t3m_00680 | KEGG_module    | M00048: Inosine monophosphate biosynthesis, PRPP + glutamine => IMP |          |
| 2572232324 | t3m_00680 | Metacyc        | PWY-6124: inosine-5'-phosphate biosynthesis II                      |          |
| 2572232324 | t3m_00680 | Metacyc        | PWY-6123: inosine-5'-phosphate biosynthesis I                       |          |
| 2572232324 | t3m_00680 | COG_category   | [F] Nucleotide transport and metabolism                             |          |
| 2572232324 | t3m_00680 | COG0152        | Phosphoribosylaminoimidazolesuccinocarboxamide (SAICAR) synthase    | 7.00E-47 |
| 2572232324 | t3m_00680 | pfam01259      | SAICAR_synt                                                         | 3.30E-34 |
| 2572232324 | t3m_00680 | EC:6.3.2.6     | Phosphoribosylaminoimidazolesuccinocarboxamide synthase.            |          |
| 2572232324 | t3m_00680 | TIGR00081      | phosphoribosylaminoimidazole-succinocarboxamide synthase            | 1.20E-57 |
| 2572232324 | t3m_00680 | KO:K01923      | phosphoribosylaminoimidazole-succinocarboxamide synthase [EC:6.3.2  | 0.00E+00 |
| 2572232324 | t3m_00680 | Locus_type     | CDS                                                                 |          |
| 2572232324 | t3m_00680 | Product_name   | phosphoribosylaminoimidazole-succinocarboxamide synthase (EC 6.3.2. |          |
| 2572232324 | t3m_00680 | Scaffold       | t3m_contig_70_80_len_43488_read_count_3312166.11                    |          |
| 2572232324 | t3m_00680 | Coordinates    | 12315..13274(-)                                                     |          |
| 2572232324 | t3m_00680 | DNA_length     | 960bp                                                               |          |
| 2572232324 | t3m_00680 | Protein_length | 319aa                                                               |          |
| 2572232324 | t3m_00680 | GC             |                                                                     | 0.68     |
| 2572232325 | t3m_00681 | COG_category   | [R] General function prediction only                                |          |
| 2572232325 | t3m_00681 | COG0456        | Acetyltransferases                                                  | 9.00E-08 |
| 2572232325 | t3m_00681 | pfam00583      | Acetyltransf_1                                                      | 6.30E-10 |
| 2572232325 | t3m_00681 | Locus_type     | CDS                                                                 |          |
| 2572232325 | t3m_00681 | Product_name   | Acetyltransferases                                                  |          |

|            |           |                |                                                                   |          |
|------------|-----------|----------------|-------------------------------------------------------------------|----------|
| 2572232325 | t3m_00681 | Scaffold       | t3m_contig_70_80_len_43488_read_count_3312166.11                  |          |
| 2572232325 | t3m_00681 | Coordinates    | 13345..13881(-)                                                   |          |
| 2572232325 | t3m_00681 | DNA_length     | 537bp                                                             |          |
| 2572232325 | t3m_00681 | Protein_length | 178aa                                                             |          |
| 2572232325 | t3m_00681 | GC             |                                                                   | 0.71     |
|            |           |                |                                                                   |          |
| 2572232326 | t3m_00682 | Metacyc        | PWY-7118: chitin degradation to ethanol                           |          |
| 2572232326 | t3m_00682 | Metacyc        | GLUCONEO-PWY: gluconeogenesis I                                   |          |
| 2572232326 | t3m_00682 | COG_category   | [C] Energy production and conversion                              |          |
| 2572232326 | t3m_00682 | COG0281        | Malic enzyme                                                      | 0.00E+00 |
| 2572232326 | t3m_00682 | pfam03949      | Malic_M                                                           | 6.50E-61 |
| 2572232326 | t3m_00682 | pfam00390      | malic                                                             | 4.10E-18 |
| 2572232326 | t3m_00682 | pfam00390      | malic                                                             | 7.30E-05 |
| 2572232326 | t3m_00682 | EC:1.1.1.38    | Malate dehydrogenase (oxaloacetate-decarboxylating).              |          |
| 2572232326 | t3m_00682 | KO:K00027      | malate dehydrogenase (oxaloacetate-decarboxylating) [EC:1.1.1.38] | 0.00E+00 |
| 2572232326 | t3m_00682 | Locus_type     | CDS                                                               |          |
| 2572232326 | t3m_00682 | Product_name   | Malic enzyme                                                      |          |
| 2572232326 | t3m_00682 | Scaffold       | t3m_contig_70_80_len_43488_read_count_3312166.11                  |          |
| 2572232326 | t3m_00682 | Coordinates    | 13878..15314(-)                                                   |          |
| 2572232326 | t3m_00682 | DNA_length     | 1437bp                                                            |          |
| 2572232326 | t3m_00682 | Protein_length | 478aa                                                             |          |
| 2572232326 | t3m_00682 | GC             |                                                                   | 0.71     |
|            |           |                |                                                                   |          |
| 2572232327 | t3m_00683 | COG_category   | [R] General function prediction only                              |          |
| 2572232327 | t3m_00683 | COG0491        | Zn-dependent hydrolases, including glyoxylases                    | 5.00E-19 |
| 2572232327 | t3m_00683 | pfam00753      | Lactamase_B                                                       | 7.50E-23 |
| 2572232327 | t3m_00683 | pfam00581      | Rhodanese                                                         | 1.80E-08 |
| 2572232327 | t3m_00683 | Locus_type     | CDS                                                               |          |
| 2572232327 | t3m_00683 | Product_name   | Zn-dependent hydrolases, including glyoxylases                    |          |
| 2572232327 | t3m_00683 | Scaffold       | t3m_contig_70_80_len_43488_read_count_3312166.11                  |          |
| 2572232327 | t3m_00683 | Coordinates    | 15472..16557(+)                                                   |          |
| 2572232327 | t3m_00683 | DNA_length     | 1086bp                                                            |          |
| 2572232327 | t3m_00683 | Protein_length | 361aa                                                             |          |
| 2572232327 | t3m_00683 | GC             |                                                                   | 0.7      |

|            |           |                |                                                                          |          |
|------------|-----------|----------------|--------------------------------------------------------------------------|----------|
| 2572232327 | t3m_00683 | Fused_gene     | Yes                                                                      |          |
| 2572232328 | t3m_00684 | COG_category   | [E] Amino acid transport and metabolism                                  |          |
| 2572232328 | t3m_00684 | COG0620        | Methionine synthase II (cobalamin-independent)                           | 3.00E-29 |
| 2572232328 | t3m_00684 | pfam08267      | Meth_synt_1                                                              | 5.40E-17 |
| 2572232328 | t3m_00684 | Locus_type     | CDS                                                                      |          |
| 2572232328 | t3m_00684 | Product_name   | Methionine synthase II (cobalamin-independent)                           |          |
| 2572232328 | t3m_00684 | Scaffold       | t3m_contig_70_80_len_43488_read_count_3312166.11                         |          |
| 2572232328 | t3m_00684 | Coordinates    | 16653..17621(+)                                                          |          |
| 2572232328 | t3m_00684 | DNA_length     | 969bp                                                                    |          |
| 2572232328 | t3m_00684 | Protein_length | 322aa                                                                    |          |
| 2572232328 | t3m_00684 | GC             |                                                                          | 0.74     |
| 2572232329 | t3m_00685 | KEGG_module    | M00017: Methionine biosynthesis, apartate => homoserine => methionine    |          |
| 2572232329 | t3m_00685 | Metacyc        | HOMOSER-METSYN-PWY: methionine biosynthesis I                            |          |
| 2572232329 | t3m_00685 | Metacyc        | HSERMETANA-PWY: methionine biosynthesis III                              |          |
| 2572232329 | t3m_00685 | Metacyc        | PWY-5041: <i>S</i> -adenosyl-L-methionine cycle II                       |          |
| 2572232329 | t3m_00685 | Metacyc        | PWY-6151: <i>S</i> -adenosyl-L-methionine cycle I                        |          |
| 2572232329 | t3m_00685 | Metacyc        | PWY-6936: seleno-amino acid biosynthesis                                 |          |
| 2572232329 | t3m_00685 | Metacyc        | PWY-702: methionine biosynthesis II                                      |          |
| 2572232329 | t3m_00685 | COG_category   | [E] Amino acid transport and metabolism                                  |          |
| 2572232329 | t3m_00685 | COG0620        | Methionine synthase II (cobalamin-independent)                           | 1.00E-57 |
| 2572232329 | t3m_00685 | pfam01717      | Meth_synt_2                                                              | 3.30E-46 |
| 2572232329 | t3m_00685 | EC:2.1.1.14    | 5-methyltetrahydropteroyltriglutamate--homocysteine S-methyltransferase. |          |
| 2572232329 | t3m_00685 | KO:K00549      | 5-methyltetrahydropteroyltriglutamate--homocysteine methyltransferase    | 0.00E+00 |
| 2572232329 | t3m_00685 | Locus_type     | CDS                                                                      |          |
| 2572232329 | t3m_00685 | Product_name   | Methionine synthase II (cobalamin-independent)                           |          |
| 2572232329 | t3m_00685 | Scaffold       | t3m_contig_70_80_len_43488_read_count_3312166.11                         |          |
| 2572232329 | t3m_00685 | Coordinates    | 17618..18760(+)                                                          |          |
| 2572232329 | t3m_00685 | DNA_length     | 1143bp                                                                   |          |
| 2572232329 | t3m_00685 | Protein_length | 380aa                                                                    |          |
| 2572232329 | t3m_00685 | GC             |                                                                          | 0.71     |
| 2572232330 | t3m_00686 | COG_category   | [J] Translation, ribosomal structure and biogenesis                      |          |

|            |           |                |                                                                                     |          |
|------------|-----------|----------------|-------------------------------------------------------------------------------------|----------|
| 2572232330 | t3m_00686 | COG0024        | Methionine aminopeptidase                                                           | 1.00E-49 |
| 2572232330 | t3m_00686 | pfam00557      | Peptidase_M24                                                                       | 1.10E-40 |
| 2572232330 | t3m_00686 | EC:3.4.11.18   | Methionyl aminopeptidase.                                                           |          |
| 2572232330 | t3m_00686 | TIGR00501      | methionine aminopeptidase, type II                                                  | 1.80E-79 |
| 2572232330 | t3m_00686 | KO:K01265      | methionyl aminopeptidase [EC:3.4.11.18]                                             | 0.00E+00 |
| 2572232330 | t3m_00686 | ITERM:02546    | methionine aminopeptidase, type II (EC 3.4.11.18)                                   |          |
| 2572232330 | t3m_00686 | Locus_type     | CDS                                                                                 |          |
| 2572232330 | t3m_00686 | Product_name   | methionine aminopeptidase, type II (EC 3.4.11.18)                                   |          |
| 2572232330 | t3m_00686 | Scaffold       | t3m_contig_70_80_len_43488_read_count_3312166.11                                    |          |
| 2572232330 | t3m_00686 | Coordinates    | 18765..19643(-)                                                                     |          |
| 2572232330 | t3m_00686 | DNA_length     | 879bp                                                                               |          |
| 2572232330 | t3m_00686 | Protein_length | 292aa                                                                               |          |
| 2572232330 | t3m_00686 | GC             |                                                                                     | 0.72     |
| 2572232331 | t3m_00687 | COG_category   | [J] Translation, ribosomal structure and biogenesis                                 |          |
| 2572232331 | t3m_00687 | COG0009        | Putative translation factor (SUA5)                                                  | 6.00E-42 |
| 2572232331 | t3m_00687 | pfam01300      | Sua5_yciO_yrdC                                                                      | 1.00E-42 |
| 2572232331 | t3m_00687 | TIGR00057      | tRNA threonylcarbamoyl adenosine modification protein, Sua5/YciO/Yr                 | 1.70E-49 |
| 2572232331 | t3m_00687 | KO:K07566      | tRNA threonylcarbamoyladenosine biosynthesis protein                                | 6.50E-32 |
| 2572232331 | t3m_00687 | ITERM:02777    | translation factor SUA5                                                             |          |
| 2572232331 | t3m_00687 | Locus_type     | CDS                                                                                 |          |
| 2572232331 | t3m_00687 | Product_name   | translation factor SUA5                                                             |          |
| 2572232331 | t3m_00687 | Scaffold       | t3m_contig_70_80_len_43488_read_count_3312166.11                                    |          |
| 2572232331 | t3m_00687 | Coordinates    | 19653..20216(-)                                                                     |          |
| 2572232331 | t3m_00687 | DNA_length     | 564bp                                                                               |          |
| 2572232331 | t3m_00687 | Protein_length | 187aa                                                                               |          |
| 2572232331 | t3m_00687 | GC             |                                                                                     | 0.72     |
| 2572232332 | t3m_00688 | KEGG_module    | M00053: Pyrimidine deoxyribonucleotide biosynthesis, CDP/CTP => dCDP/dCTP,dTDP/dTTP |          |
| 2572232332 | t3m_00688 | KEGG_module    | M00052: Pyrimidine ribonucleotide biosynthesis, UMP => UDP/UTP,CDP/CTP              |          |
| 2572232332 | t3m_00688 | KEGG_module    | M00049: Adenine ribonucleotide biosynthesis, IMP => ADP,ATP                         |          |
| 2572232332 | t3m_00688 | KEGG_module    | M00050: Guanine ribonucleotide biosynthesis IMP => GDP,GTP                          |          |
| 2572232332 | t3m_00688 | Metacyc        | PWY-6125: guanosine nucleotides <i>de novo</i> biosynthesis                         |          |
| 2572232332 | t3m_00688 | Metacyc        | PWY-6545: pyrimidine deoxyribonucleotides <i>de novo</i> biosynthesis III           |          |

|            |           |                |                                                                                                 |          |
|------------|-----------|----------------|-------------------------------------------------------------------------------------------------|----------|
| 2572232332 | t3m_00688 | Metacyc        | PWY-6126: adenosine nucleotides <i>de novo</i> biosynthesis                                     |          |
| 2572232332 | t3m_00688 | Metacyc        | PWY-7197: pyrimidine deoxyribonucleotide phosphorylation                                        |          |
| 2572232332 | t3m_00688 | Metacyc        | PWY-7210: pyrimidine deoxyribonucleotides biosynthesis from CTP                                 |          |
| 2572232332 | t3m_00688 | Metacyc        | PWY-7184: pyrimidine deoxyribonucleotides <i>de novo</i> biosynthesis I                         |          |
| 2572232332 | t3m_00688 | Metacyc        | PWY-7187: pyrimidine deoxyribonucleotides <i>de novo</i> biosynthesis II                        |          |
| 2572232332 | t3m_00688 | Metacyc        | PWY0-166: superpathway of pyrimidine deoxyribonucleotides <i>de novo</i> biosynthesis (E. coli) |          |
| 2572232332 | t3m_00688 | Metacyc        | PWY-7198: pyrimidine deoxyribonucleotides <i>de novo</i> biosynthesis IV                        |          |
| 2572232332 | t3m_00688 | Metacyc        | PWY-7205: CMP phosphorylation                                                                   |          |
| 2572232332 | t3m_00688 | Metacyc        | PWY-7176: UTP and CTP <i>de novo</i> biosynthesis                                               |          |
| 2572232332 | t3m_00688 | Metacyc        | PPGPPMET-PWY: ppGpp biosynthesis                                                                |          |
| 2572232332 | t3m_00688 | IMG_pathway    | 296: GTP biosynthesis                                                                           |          |
| 2572232332 | t3m_00688 | IMG_pathway    | 323: UTP synthesis                                                                              |          |
| 2572232332 | t3m_00688 | IMG_pathway    | 332: dTTP synthesis                                                                             |          |
| 2572232332 | t3m_00688 | IMG_pathway    | 476: Cytidine conversion to CTP                                                                 |          |
| 2572232332 | t3m_00688 | COG_category   | [F] Nucleotide transport and metabolism                                                         |          |
| 2572232332 | t3m_00688 | COG0105        | Nucleoside diphosphate kinase                                                                   | 1.00E-51 |
| 2572232332 | t3m_00688 | pfam00334      | NDK                                                                                             | 2.00E-52 |
| 2572232332 | t3m_00688 | EC:2.7.4.6     | Nucleoside-diphosphate kinase.                                                                  |          |
| 2572232332 | t3m_00688 | KO:K00940      | nucleoside-diphosphate kinase [EC:2.7.4.6]                                                      | 0.00E+00 |
| 2572232332 | t3m_00688 | ITERM:01287    | nucleoside diphosphate kinase (EC 2.7.4.6)                                                      |          |
| 2572232332 | t3m_00688 | Locus_type     | CDS                                                                                             |          |
| 2572232332 | t3m_00688 | Product_name   | nucleoside diphosphate kinase (EC 2.7.4.6)                                                      |          |
| 2572232332 | t3m_00688 | Scaffold       | t3m_contig_70_80_len_43488_read_count_3312166.11                                                |          |
| 2572232332 | t3m_00688 | Coordinates    | 20223..20681(-)                                                                                 |          |
| 2572232332 | t3m_00688 | DNA_length     | 459bp                                                                                           |          |
| 2572232332 | t3m_00688 | Protein_length | 152aa                                                                                           |          |
| 2572232332 | t3m_00688 | GC             |                                                                                                 | 0.69     |
| 2572232333 | t3m_00689 | pfam12705      | PDDEXK_1                                                                                        | 8.60E-06 |
| 2572232333 | t3m_00689 | KO:K07464      | putative RecB family exonuclease                                                                | 3.00E-22 |
| 2572232333 | t3m_00689 | ITERM:05077    | CRISPR-associated exonuclease, Cas4 family                                                      |          |
| 2572232333 | t3m_00689 | Locus_type     | CDS                                                                                             |          |
| 2572232333 | t3m_00689 | Product_name   | CRISPR-associated exonuclease, Cas4 family                                                      |          |
| 2572232333 | t3m_00689 | Scaffold       | t3m_contig_70_80_len_43488_read_count_3312166.11                                                |          |

|            |           |                |                                                     |          |
|------------|-----------|----------------|-----------------------------------------------------|----------|
| 2572232333 | t3m_00689 | Coordinates    | 20782..21309(-)                                     |          |
| 2572232333 | t3m_00689 | DNA_length     | 528bp                                               |          |
| 2572232333 | t3m_00689 | Protein_length | 175aa                                               |          |
| 2572232333 | t3m_00689 | GC             |                                                     | 0.75     |
| 2572232333 | t3m_00689 | Transmembrane  | Yes                                                 |          |
| 2572232334 | t3m_00690 | Locus_type     | CDS                                                 |          |
| 2572232334 | t3m_00690 | Product_name   | hypothetical protein                                |          |
| 2572232334 | t3m_00690 | Scaffold       | t3m_contig_70_80_len_43488_read_count_3312166.11    |          |
| 2572232334 | t3m_00690 | Coordinates    | 21288..21551(-)                                     |          |
| 2572232334 | t3m_00690 | DNA_length     | 264bp                                               |          |
| 2572232334 | t3m_00690 | Protein_length | 87aa                                                |          |
| 2572232334 | t3m_00690 | GC             |                                                     | 0.7      |
| 2572232334 | t3m_00690 | Transmembrane  | Yes                                                 |          |
| 2572232335 | t3m_00691 | COG_category   | [J] Translation, ribosomal structure and biogenesis |          |
| 2572232335 | t3m_00691 | COG2075        | Ribosomal protein L24E                              | 3.00E-13 |
| 2572232335 | t3m_00691 | pfam01246      | Ribosomal_L24e                                      | 6.30E-18 |
| 2572232335 | t3m_00691 | Locus_type     | CDS                                                 |          |
| 2572232335 | t3m_00691 | Product_name   | Ribosomal protein L24E                              |          |
| 2572232335 | t3m_00691 | Scaffold       | t3m_contig_70_80_len_43488_read_count_3312166.11    |          |
| 2572232335 | t3m_00691 | Coordinates    | 21620..22036(-)                                     |          |
| 2572232335 | t3m_00691 | DNA_length     | 417bp                                               |          |
| 2572232335 | t3m_00691 | Protein_length | 138aa                                               |          |
| 2572232335 | t3m_00691 | GC             |                                                     | 0.72     |
| 2572232336 | t3m_00692 | KEGG_module    | M00179: Ribosome, archaea                           |          |
| 2572232336 | t3m_00692 | KEGG_module    | M00177: Ribosome, eukaryotes                        |          |
| 2572232336 | t3m_00692 | COG_category   | [J] Translation, ribosomal structure and biogenesis |          |
| 2572232336 | t3m_00692 | COG2053        | Ribosomal protein S28E/S33                          | 2.00E-17 |
| 2572232336 | t3m_00692 | pfam01200      | Ribosomal_S28e                                      | 1.50E-27 |
| 2572232336 | t3m_00692 | KO:K02979      | small subunit ribosomal protein S28e                | 1.30E-22 |
| 2572232336 | t3m_00692 | Locus_type     | CDS                                                 |          |
| 2572232336 | t3m_00692 | Product_name   | SSU ribosomal protein S28E                          |          |



|            |           |                |                                                     |          |
|------------|-----------|----------------|-----------------------------------------------------|----------|
| 2572232336 | t3m_00692 | Scaffold       | t3m_contig_70_80_len_43488_read_count_3312166.11    |          |
| 2572232336 | t3m_00692 | Coordinates    | 22050..22262(-)                                     |          |
| 2572232336 | t3m_00692 | DNA_length     | 213bp                                               |          |
| 2572232336 | t3m_00692 | Protein_length | 70aa                                                |          |
| 2572232336 | t3m_00692 | GC             |                                                     | 0.7      |
|            |           |                |                                                     |          |
| 2572232337 | t3m_00693 | KEGG_module    | M00179: Ribosome, archaea                           |          |
| 2572232337 | t3m_00693 | KEGG_module    | M00177: Ribosome, eukaryotes                        |          |
| 2572232337 | t3m_00693 | COG_category   | [J] Translation, ribosomal structure and biogenesis |          |
| 2572232337 | t3m_00693 | COG1358        | Ribosomal protein HS6-type (S12/L30/L7a)            | 9.00E-23 |
| 2572232337 | t3m_00693 | pfam01248      | Ribosomal_L7Ae                                      | 6.50E-28 |
| 2572232337 | t3m_00693 | TIGR03677      | 50S ribosomal protein L7Ae                          | 5.10E-48 |
| 2572232337 | t3m_00693 | KO:K02936      | large subunit ribosomal protein L7Ae                | 1.60E-38 |
| 2572232337 | t3m_00693 | ITERM:00224    | LSU ribosomal protein L7AE                          |          |
| 2572232337 | t3m_00693 | Locus_type     | CDS                                                 |          |
| 2572232337 | t3m_00693 | Product_name   | LSU ribosomal protein L7AE                          |          |
| 2572232337 | t3m_00693 | Scaffold       | t3m_contig_70_80_len_43488_read_count_3312166.11    |          |
| 2572232337 | t3m_00693 | Coordinates    | 22299..22721(-)                                     |          |
| 2572232337 | t3m_00693 | DNA_length     | 423bp                                               |          |
| 2572232337 | t3m_00693 | Protein_length | 140aa                                               |          |
| 2572232337 | t3m_00693 | GC             |                                                     | 0.66     |
|            |           |                |                                                     |          |
| 2572232338 | t3m_00694 | KEGG_module    | M00360: Aminoacyl-tRNA biosynthesis, prokaryotes    |          |
| 2572232338 | t3m_00694 | KEGG_module    | M00359: Aminoacyl-tRNA biosynthesis, eukaryotes     |          |
| 2572232338 | t3m_00694 | Metacyc        | TRNA-CHARGING-PWY: tRNA charging                    |          |
| 2572232338 | t3m_00694 | IMG_pathway    | 507: L-tyrosine ligation to tRNA(Tyr)               |          |
| 2572232338 | t3m_00694 | COG_category   | [J] Translation, ribosomal structure and biogenesis |          |
| 2572232338 | t3m_00694 | COG0162        | Tyrosyl-tRNA synthetase                             | 2.00E-60 |
| 2572232338 | t3m_00694 | pfam00579      | tRNA-synt_1b                                        | 3.80E-36 |
| 2572232338 | t3m_00694 | EC:6.1.1.1     | Tyrosine--tRNA ligase.                              |          |
| 2572232338 | t3m_00694 | TIGR00234      | tyrosyl-tRNA synthetase                             | 4.80E-35 |
| 2572232338 | t3m_00694 | KO:K01866      | tyrosyl-tRNA synthetase [EC:6.1.1.1]                | 0.00E+00 |
| 2572232338 | t3m_00694 | ITERM:00400    | tyrosyl-tRNA synthetase (EC 6.1.1.1)                |          |
| 2572232338 | t3m_00694 | Locus_type     | CDS                                                 |          |

|            |           |                |                                                            |          |
|------------|-----------|----------------|------------------------------------------------------------|----------|
| 2572232338 | t3m_00694 | Product_name   | tyrosyl-tRNA synthetase (EC 6.1.1.1)                       |          |
| 2572232338 | t3m_00694 | Scaffold       | t3m_contig_70_80_len_43488_read_count_3312166.11           |          |
| 2572232338 | t3m_00694 | Coordinates    | 22775..23842(-)                                            |          |
| 2572232338 | t3m_00694 | DNA_length     | 1068bp                                                     |          |
| 2572232338 | t3m_00694 | Protein_length | 355aa                                                      |          |
| 2572232338 | t3m_00694 | GC             |                                                            | 0.7      |
| 2572232339 | t3m_00695 | COG_category   | [T] Signal transduction mechanisms                         |          |
| 2572232339 | t3m_00695 | COG0467        | RecA-superfamily ATPases implicated in signal transduction | 2.00E-21 |
| 2572232339 | t3m_00695 | pfam06745      | KaiC                                                       | 7.40E-18 |
| 2572232339 | t3m_00695 | Locus_type     | CDS                                                        |          |
| 2572232339 | t3m_00695 | Product_name   | RecA-superfamily ATPases implicated in signal transduction |          |
| 2572232339 | t3m_00695 | Scaffold       | t3m_contig_70_80_len_43488_read_count_3312166.11           |          |
| 2572232339 | t3m_00695 | Coordinates    | 23968..26382(+)                                            |          |
| 2572232339 | t3m_00695 | DNA_length     | 2415bp                                                     |          |
| 2572232339 | t3m_00695 | Protein_length | 804aa                                                      |          |
| 2572232339 | t3m_00695 | GC             |                                                            | 0.7      |
| 2572232340 | t3m_00696 | Locus_type     | miscRNA                                                    |          |
| 2572232340 | t3m_00696 | Product_name   | Archaeal signal recognition particle RNA                   |          |
| 2572232340 | t3m_00696 | Scaffold       | t3m_contig_70_80_len_43488_read_count_3312166.11           |          |
| 2572232340 | t3m_00696 | Coordinates    | 26466..26778(+)                                            |          |
| 2572232340 | t3m_00696 | DNA_length     | 313bp                                                      |          |
| 2572232340 | t3m_00696 | GC             |                                                            | 0.71     |
| 2572232341 | t3m_00697 | Locus_type     | CDS                                                        |          |
| 2572232341 | t3m_00697 | Product_name   | hypothetical protein                                       |          |
| 2572232341 | t3m_00697 | Scaffold       | t3m_contig_70_80_len_43488_read_count_3312166.11           |          |
| 2572232341 | t3m_00697 | Coordinates    | 26854..27147(+)                                            |          |
| 2572232341 | t3m_00697 | DNA_length     | 294bp                                                      |          |
| 2572232341 | t3m_00697 | Protein_length | 97aa                                                       |          |
| 2572232341 | t3m_00697 | GC             |                                                            | 0.65     |
| 2572232342 | t3m_00698 | Metacyc        | PWY-6951: docosahexanoate biosynthesis II                  |          |

|            |           |                |                                                                     |          |
|------------|-----------|----------------|---------------------------------------------------------------------|----------|
| 2572232342 | t3m_00698 | Metacyc        | PWY0-1337: oleate &beta;-oxidation                                  |          |
| 2572232342 | t3m_00698 | Metacyc        | PWY-361: phenylpropanoid biosynthesis                               |          |
| 2572232342 | t3m_00698 | Metacyc        | PWY-6320: phaselate biosynthesis                                    |          |
| 2572232342 | t3m_00698 | Metacyc        | PWY-6944: androstenedione degradation                               |          |
| 2572232342 | t3m_00698 | Metacyc        | PWY-6673: caffeoylglucarate biosynthesis                            |          |
| 2572232342 | t3m_00698 | Metacyc        | PWY-6048: methylthiopropionate degradation I (cleavage)             |          |
| 2572232342 | t3m_00698 | Metacyc        | PWY-7027: hentriaconta-3,6,9,12,15,19,22,25,28-nonaene biosynthesis |          |
| 2572232342 | t3m_00698 | Metacyc        | PWY-6039: chlorogenic acid biosynthesis I                           |          |
| 2572232342 | t3m_00698 | Metacyc        | PWY-981: salicylate biosynthesis II                                 |          |
| 2572232342 | t3m_00698 | Metacyc        | PWY-7053: docosahexanoate biosynthesis I                            |          |
| 2572232342 | t3m_00698 | Metacyc        | PWY-6948: sitosterol degradation to androstenedione                 |          |
| 2572232342 | t3m_00698 | Metacyc        | PWY-5996: oleate biosynthesis II (animals and fungi)                |          |
| 2572232342 | t3m_00698 | Metacyc        | PWY-7007: methyl ketone biosynthesis                                |          |
| 2572232342 | t3m_00698 | Metacyc        | PWY-6453: stigma estolide biosynthesis                              |          |
| 2572232342 | t3m_00698 | Metacyc        | PWY-6585: 2-tridecanone biosynthesis                                |          |
| 2572232342 | t3m_00698 | COG_category   | [R] General function prediction only                                |          |
| 2572232342 | t3m_00698 | COG0824        | Predicted thioesterase                                              | 1.00E-16 |
| 2572232342 | t3m_00698 | pfam13279      | 4HBT_2                                                              | 2.30E-14 |
| 2572232342 | t3m_00698 | EC:3.1.2.-     | Hydrolases. Acting on ester bonds. Thiolester hydrolases.           |          |
| 2572232342 | t3m_00698 | TIGR00051      | acyl-CoA thioester hydrolase, YbgC/YbaW family                      | 8.80E-13 |
| 2572232342 | t3m_00698 | KO:K07107      | acyl-CoA thioester hydrolase [EC:3.1.2.-]                           | 1.90E-10 |
| 2572232342 | t3m_00698 | Locus_type     | CDS                                                                 |          |
| 2572232342 | t3m_00698 | Product_name   | Predicted thioesterase                                              |          |
| 2572232342 | t3m_00698 | Scaffold       | t3m_contig_70_80_len_43488_read_count_3312166.11                    |          |
| 2572232342 | t3m_00698 | Coordinates    | 27185..27640(-)                                                     |          |
| 2572232342 | t3m_00698 | DNA_length     | 456bp                                                               |          |
| 2572232342 | t3m_00698 | Protein_length | 151aa                                                               |          |
| 2572232342 | t3m_00698 | GC             |                                                                     | 0.65     |
| 2572232343 | t3m_00699 | KEGG_module    | M00346: Formaldehyde assimilation, serine pathway                   |          |
| 2572232343 | t3m_00699 | KEGG_module    | M00532: Photorespiration                                            |          |
| 2572232343 | t3m_00699 | KEGG_module    | M00141: C1-unit interconversion, eukaryotes                         |          |
| 2572232343 | t3m_00699 | KEGG_module    | M00140: C1-unit interconversion, prokaryotes                        |          |
| 2572232343 | t3m_00699 | Metacyc        | PWY-2161: folate polyglutamylation                                  |          |

|            |           |                |                                                         |           |
|------------|-----------|----------------|---------------------------------------------------------|-----------|
| 2572232343 | t3m_00699 | Metacyc        | 1CMET2-PWY: formylTHF biosynthesis I                    |           |
| 2572232343 | t3m_00699 | Metacyc        | PWY-3841: folate transformations II                     |           |
| 2572232343 | t3m_00699 | Metacyc        | PWY-5497: purine nucleobases degradation II (anaerobic) |           |
| 2572232343 | t3m_00699 | Metacyc        | GLYSYN-PWY: glycine biosynthesis I                      |           |
| 2572232343 | t3m_00699 | Metacyc        | PWY-2201: folate transformations I                      |           |
| 2572232343 | t3m_00699 | Metacyc        | PWY-3661: glycine betaine degradation                   |           |
| 2572232343 | t3m_00699 | Metacyc        | PWY-181: photorespiration                               |           |
| 2572232343 | t3m_00699 | Metacyc        | PWY-1622: formaldehyde assimilation I (serine pathway)  |           |
| 2572232343 | t3m_00699 | IMG_pathway    | 1029: 5,10-methylenetetrahydrofolate polyglutamination  |           |
| 2572232343 | t3m_00699 | IMG_pathway    | 127: L-serine conversion to glycine and methylene-THF   |           |
| 2572232343 | t3m_00699 | IMG_pathway    | 959: Serine cycle                                       |           |
| 2572232343 | t3m_00699 | COG_category   | [E] Amino acid transport and metabolism                 |           |
| 2572232343 | t3m_00699 | COG0112        | Glycine/serine hydroxymethyltransferase                 | 7.00E-112 |
| 2572232343 | t3m_00699 | pfam00464      | SHMT                                                    | 1.20E-69  |
| 2572232343 | t3m_00699 | EC:2.1.2.1     | Glycine hydroxymethyltransferase.                       |           |
| 2572232343 | t3m_00699 | KO:K00600      | glycine hydroxymethyltransferase [EC:2.1.2.1]           | 0.00E+00  |
| 2572232343 | t3m_00699 | ITERM:00210    | serine hydroxymethyltransferase (EC 2.1.2.1)            |           |
| 2572232343 | t3m_00699 | Locus_type     | CDS                                                     |           |
| 2572232343 | t3m_00699 | Product_name   | serine hydroxymethyltransferase (EC 2.1.2.1)            |           |
| 2572232343 | t3m_00699 | Scaffold       | t3m_contig_70_80_len_43488_read_count_3312166.11        |           |
| 2572232343 | t3m_00699 | Coordinates    | 27764..29095(+)                                         |           |
| 2572232343 | t3m_00699 | DNA_length     | 1332bp                                                  |           |
| 2572232343 | t3m_00699 | Protein_length | 443aa                                                   |           |
| 2572232343 | t3m_00699 | GC             |                                                         | 0.7       |
| 2572232344 | t3m_00700 | Locus_type     | CDS                                                     |           |
| 2572232344 | t3m_00700 | Product_name   | hypothetical protein                                    |           |
| 2572232344 | t3m_00700 | Scaffold       | t3m_contig_70_80_len_43488_read_count_3312166.11        |           |
| 2572232344 | t3m_00700 | Coordinates    | 29116..30435(-)                                         |           |
| 2572232344 | t3m_00700 | DNA_length     | 1320bp                                                  |           |
| 2572232344 | t3m_00700 | Protein_length | 439aa                                                   |           |
| 2572232344 | t3m_00700 | GC             |                                                         | 0.73      |
| 2572232344 | t3m_00700 | Transmembrane  | Yes                                                     |           |

|            |           |                |                                                                                    |          |
|------------|-----------|----------------|------------------------------------------------------------------------------------|----------|
| 2572232345 | t3m_00701 | COG_category   | [L] Replication, recombination and repair                                          |          |
| 2572232345 | t3m_00701 | COG0122        | 3-methyladenine DNA glycosylase/8-oxoguanine DNA glycosylase                       | 8.00E-34 |
| 2572232345 | t3m_00701 | pfam00730      | HhH-GPD                                                                            | 1.60E-13 |
| 2572232345 | t3m_00701 | EC:3.2.2.21    | DNA-3-methyladenine glycosylase II.                                                |          |
| 2572232345 | t3m_00701 | KO:K01247      | DNA-3-methyladenine glycosylase II [EC:3.2.2.21]                                   | 9.50E-29 |
| 2572232345 | t3m_00701 | Locus_type     | CDS                                                                                |          |
| 2572232345 | t3m_00701 | Product_name   | 3-methyladenine DNA glycosylase/8-oxoguanine DNA glycosylase                       |          |
| 2572232345 | t3m_00701 | Scaffold       | t3m_contig_70_80_len_43488_read_count_3312166.11                                   |          |
| 2572232345 | t3m_00701 | Coordinates    | 30578..31486(+)                                                                    |          |
| 2572232345 | t3m_00701 | DNA_length     | 909bp                                                                              |          |
| 2572232345 | t3m_00701 | Protein_length | 302aa                                                                              |          |
| 2572232345 | t3m_00701 | GC             |                                                                                    | 0.72     |
|            |           |                |                                                                                    |          |
| 2572232346 | t3m_00702 | Metacyc        | PWY-6689: tRNA splicing                                                            |          |
| 2572232346 | t3m_00702 | COG_category   | [J] Translation, ribosomal structure and biogenesis                                |          |
| 2572232346 | t3m_00702 | COG1514        | 2'-5' RNA ligase                                                                   | 3.00E-23 |
| 2572232346 | t3m_00702 | pfam13563      | 2_5_RNA_ligase2                                                                    | 2.50E-16 |
| 2572232346 | t3m_00702 | EC:6.5.1.-     | Ligases. Forming phosphoric ester bonds. Ligases that form phosphoric-ester bonds. |          |
| 2572232346 | t3m_00702 | TIGR02258      | 2'-5' RNA ligase                                                                   | 7.00E-35 |
| 2572232346 | t3m_00702 | KO:K01975      | 2'-5' RNA ligase [EC:6.5.1.-]                                                      | 4.50E-22 |
| 2572232346 | t3m_00702 | Locus_type     | CDS                                                                                |          |
| 2572232346 | t3m_00702 | Product_name   | 2'-5' RNA ligase                                                                   |          |
| 2572232346 | t3m_00702 | Scaffold       | t3m_contig_70_80_len_43488_read_count_3312166.11                                   |          |
| 2572232346 | t3m_00702 | Coordinates    | 31518..32057(-)                                                                    |          |
| 2572232346 | t3m_00702 | DNA_length     | 540bp                                                                              |          |
| 2572232346 | t3m_00702 | Protein_length | 179aa                                                                              |          |
| 2572232346 | t3m_00702 | GC             |                                                                                    | 0.74     |
|            |           |                |                                                                                    |          |
| 2572232347 | t3m_00703 | pfam12846      | AAA_10                                                                             | 4.00E-18 |
| 2572232347 | t3m_00703 | Locus_type     | CDS                                                                                |          |
| 2572232347 | t3m_00703 | Product_name   | AAA-like domain                                                                    |          |
| 2572232347 | t3m_00703 | Scaffold       | t3m_contig_70_80_len_43488_read_count_3312166.11                                   |          |
| 2572232347 | t3m_00703 | Coordinates    | 32083..34038(-)                                                                    |          |
| 2572232347 | t3m_00703 | DNA_length     | 1956bp                                                                             |          |

|            |           |                |                                        |                                                  |          |
|------------|-----------|----------------|----------------------------------------|--------------------------------------------------|----------|
| 2572232347 | t3m_00703 | Protein_length |                                        | 651aa                                            |          |
| 2572232347 | t3m_00703 | GC             |                                        |                                                  | 0.73     |
| 2572232348 | t3m_00704 | Locus_type     |                                        | CDS                                              |          |
| 2572232348 | t3m_00704 | Product_name   |                                        | hypothetical protein                             |          |
| 2572232348 | t3m_00704 | Scaffold       |                                        | t3m_contig_70_80_len_43488_read_count_3312166.11 |          |
| 2572232348 | t3m_00704 | Coordinates    |                                        | 34088..34615(+)                                  |          |
| 2572232348 | t3m_00704 | DNA_length     |                                        | 528bp                                            |          |
| 2572232348 | t3m_00704 | Protein_length |                                        | 175aa                                            |          |
| 2572232348 | t3m_00704 | GC             |                                        |                                                  | 0.72     |
| 2572232349 | t3m_00705 | Locus_type     |                                        | CDS                                              |          |
| 2572232349 | t3m_00705 | Product_name   |                                        | hypothetical protein                             |          |
| 2572232349 | t3m_00705 | Scaffold       |                                        | t3m_contig_70_80_len_43488_read_count_3312166.11 |          |
| 2572232349 | t3m_00705 | Coordinates    |                                        | 34657..34899(-)                                  |          |
| 2572232349 | t3m_00705 | DNA_length     |                                        | 243bp                                            |          |
| 2572232349 | t3m_00705 | Protein_length |                                        | 80aa                                             |          |
| 2572232349 | t3m_00705 | GC             |                                        |                                                  | 0.72     |
| 2572232350 | t3m_00706 | pfam00583      | Acetyltransf_1                         |                                                  | 2.90E-11 |
| 2572232350 | t3m_00706 | Locus_type     |                                        | CDS                                              |          |
| 2572232350 | t3m_00706 | Product_name   |                                        | Acetyltransferase (GNAT) family                  |          |
| 2572232350 | t3m_00706 | Scaffold       |                                        | t3m_contig_70_80_len_43488_read_count_3312166.11 |          |
| 2572232350 | t3m_00706 | Coordinates    |                                        | 35620..36582(+)                                  |          |
| 2572232350 | t3m_00706 | DNA_length     |                                        | 963bp                                            |          |
| 2572232350 | t3m_00706 | Protein_length |                                        | 320aa                                            |          |
| 2572232350 | t3m_00706 | GC             |                                        |                                                  | 0.65     |
| 2572232351 | t3m_00707 | COG_category   | [K] Transcription                      |                                                  |          |
| 2572232351 | t3m_00707 | COG1733        | Predicted transcriptional regulators   |                                                  | 2.00E-22 |
| 2572232351 | t3m_00707 | pfam01638      | HxIR                                   |                                                  | 3.90E-22 |
| 2572232351 | t3m_00707 | ITERM:02284    | transcriptional regulator, HxIR family |                                                  |          |
| 2572232351 | t3m_00707 | Locus_type     |                                        | CDS                                              |          |
| 2572232351 | t3m_00707 | Product_name   |                                        | transcriptional regulator, HxIR family           |          |

|            |           |                |                                              |                                                  |          |
|------------|-----------|----------------|----------------------------------------------|--------------------------------------------------|----------|
| 2572232351 | t3m_00707 | Scaffold       |                                              | t3m_contig_70_80_len_43488_read_count_3312166.11 |          |
| 2572232351 | t3m_00707 | Coordinates    |                                              | 36857..37345(-)                                  |          |
| 2572232351 | t3m_00707 | DNA_length     |                                              | 489bp                                            |          |
| 2572232351 | t3m_00707 | Protein_length |                                              | 162aa                                            |          |
| 2572232351 | t3m_00707 | GC             |                                              |                                                  | 0.72     |
|            |           |                |                                              |                                                  |          |
| 2572232352 | t3m_00708 | Locus_type     |                                              | CDS                                              |          |
| 2572232352 | t3m_00708 | Product_name   |                                              | hypothetical protein                             |          |
| 2572232352 | t3m_00708 | Scaffold       |                                              | t3m_contig_70_80_len_43488_read_count_3312166.11 |          |
| 2572232352 | t3m_00708 | Coordinates    |                                              | 37488..38102(+)                                  |          |
| 2572232352 | t3m_00708 | DNA_length     |                                              | 615bp                                            |          |
| 2572232352 | t3m_00708 | Protein_length |                                              | 204aa                                            |          |
| 2572232352 | t3m_00708 | GC             |                                              |                                                  | 0.72     |
|            |           |                |                                              |                                                  |          |
| 2572232353 | t3m_00709 | pfam13660      | DUF4147                                      |                                                  | 1.90E-24 |
| 2572232353 | t3m_00709 | Locus_type     |                                              | CDS                                              |          |
| 2572232353 | t3m_00709 | Product_name   |                                              | Domain of unknown function (DUF4147)             |          |
| 2572232353 | t3m_00709 | Scaffold       |                                              | t3m_contig_70_80_len_43488_read_count_3312166.11 |          |
| 2572232353 | t3m_00709 | Coordinates    |                                              | 38099..39448(-)                                  |          |
| 2572232353 | t3m_00709 | DNA_length     |                                              | 1350bp                                           |          |
| 2572232353 | t3m_00709 | Protein_length |                                              | 449aa                                            |          |
| 2572232353 | t3m_00709 | GC             |                                              |                                                  | 0.73     |
|            |           |                |                                              |                                                  |          |
| 2572232354 | t3m_00710 | Metacyc        | PWY-4722: creatinine degradation II          |                                                  |          |
| 2572232354 | t3m_00710 | Metacyc        | CRNFORCAT-PWY: creatinine degradation I      |                                                  |          |
| 2572232354 | t3m_00710 | Metacyc        | PWY-3661: glycine betaine degradation        |                                                  |          |
| 2572232354 | t3m_00710 | COG_category   | [E] Amino acid transport and metabolism      |                                                  |          |
| 2572232354 | t3m_00710 | COG0665        | Glycine/D-amino acid oxidases (deaminating)  |                                                  | 1.00E-48 |
| 2572232354 | t3m_00710 | pfam01266      | DAO                                          |                                                  | 9.20E-77 |
| 2572232354 | t3m_00710 | EC:1.5.3.1     | Sarcosine oxidase.                           |                                                  |          |
| 2572232354 | t3m_00710 | KO:K00303      | sarcosine oxidase, subunit beta [EC:1.5.3.1] |                                                  | 0.00E+00 |
| 2572232354 | t3m_00710 | Locus_type     |                                              | CDS                                              |          |
| 2572232354 | t3m_00710 | Product_name   |                                              | Glycine/D-amino acid oxidases (deaminating)      |          |
| 2572232354 | t3m_00710 | Scaffold       |                                              | t3m_contig_70_80_len_43488_read_count_3312166.11 |          |

|            |           |                |                                                                  |          |
|------------|-----------|----------------|------------------------------------------------------------------|----------|
| 2572232354 | t3m_00710 | Coordinates    | 39501..40664(-)                                                  |          |
| 2572232354 | t3m_00710 | DNA_length     | 1164bp                                                           |          |
| 2572232354 | t3m_00710 | Protein_length | 387aa                                                            |          |
| 2572232354 | t3m_00710 | GC             |                                                                  | 0.71     |
| 2572232354 | t3m_00710 | Transmembrane  | Yes                                                              |          |
| 2572232355 | t3m_00711 | COG_category   | [O] Posttranslational modification, protein turnover, chaperones |          |
| 2572232355 | t3m_00711 | COG0492        | Thioredoxin reductase                                            | 1.00E-10 |
| 2572232355 | t3m_00711 | pfam13510      | Fer2_4                                                           | 2.30E-19 |
| 2572232355 | t3m_00711 | Locus_type     | CDS                                                              |          |
| 2572232355 | t3m_00711 | Product_name   | Thioredoxin reductase                                            |          |
| 2572232355 | t3m_00711 | Scaffold       | t3m_contig_70_80_len_43488_read_count_3312166.11                 |          |
| 2572232355 | t3m_00711 | Coordinates    | 40661..42328(-)                                                  |          |
| 2572232355 | t3m_00711 | DNA_length     | 1668bp                                                           |          |
| 2572232355 | t3m_00711 | Protein_length | 555aa                                                            |          |
| 2572232355 | t3m_00711 | GC             |                                                                  | 0.72     |
| 2572232355 | t3m_00711 | Fused_gene     | Yes                                                              |          |
| 2572232356 | t3m_00712 | COG_category   | [P] Inorganic ion transport and metabolism                       |          |
| 2572232356 | t3m_00712 | COG0704        | Phosphate uptake regulator                                       | 5.00E-28 |
| 2572232356 | t3m_00712 | pfam04014      | Antitoxin-MazE                                                   | 1.40E-04 |
| 2572232356 | t3m_00712 | pfam01895      | PhoU                                                             | 3.90E-06 |
| 2572232356 | t3m_00712 | pfam01895      | PhoU                                                             | 2.90E-19 |
| 2572232356 | t3m_00712 | Locus_type     | CDS                                                              |          |
| 2572232356 | t3m_00712 | Product_name   | Phosphate uptake regulator                                       |          |
| 2572232356 | t3m_00712 | Scaffold       | t3m_contig_70_80_len_43488_read_count_3312166.11                 |          |
| 2572232356 | t3m_00712 | Coordinates    | 42469..43485(+)                                                  |          |
| 2572232356 | t3m_00712 | DNA_length     | 1017bp                                                           |          |
| 2572232356 | t3m_00712 | Protein_length | 339aa                                                            |          |
| 2572232356 | t3m_00712 | GC             |                                                                  | 0.67     |
| 2572232357 | t3m_00713 | Locus_type     | tRNA                                                             |          |
| 2572232357 | t3m_00713 | Product_name   | tRNA_Pro_TGG                                                     |          |
| 2572232357 | t3m_00713 | Scaffold       | t3m_contig_70_84_len_42953_read_count_3343224.12                 |          |



|            |           |                |                                                              |          |
|------------|-----------|----------------|--------------------------------------------------------------|----------|
| 2572232357 | t3m_00713 | Coordinates    | 7..51(+)                                                     |          |
| 2572232357 | t3m_00713 | DNA_length     | 45bp                                                         |          |
| 2572232357 | t3m_00713 | GC             |                                                              | 0.58     |
| 2572232358 | t3m_00714 | COG_category   | [M] Cell wall/membrane/envelope biogenesis                   |          |
| 2572232358 | t3m_00714 | COG0438        | Glycosyltransferase                                          | 7.00E-25 |
| 2572232358 | t3m_00714 | pfam00534      | Glycos_transf_1                                              | 2.80E-22 |
| 2572232358 | t3m_00714 | pfam13579      | Glyco_trans_4_4                                              | 2.80E-18 |
| 2572232358 | t3m_00714 | EC:2.4.1.57    | Phosphatidylinositol alpha-mannosyltransferase.              |          |
| 2572232358 | t3m_00714 | KO:K08256      | phosphatidylinositol alpha-mannosyltransferase [EC:2.4.1.57] | 2.70E-17 |
| 2572232358 | t3m_00714 | Locus_type     | CDS                                                          |          |
| 2572232358 | t3m_00714 | Product_name   | Glycosyltransferase                                          |          |
| 2572232358 | t3m_00714 | Scaffold       | t3m_contig_70_84_len_42953_read_count_3343224.12             |          |
| 2572232358 | t3m_00714 | Coordinates    | 73..1176(-)                                                  |          |
| 2572232358 | t3m_00714 | DNA_length     | 1104bp                                                       |          |
| 2572232358 | t3m_00714 | Protein_length | 367aa                                                        |          |
| 2572232358 | t3m_00714 | GC             |                                                              | 0.69     |
| 2572232359 | t3m_00715 | Locus_type     | CDS                                                          |          |
| 2572232359 | t3m_00715 | Product_name   | hypothetical protein                                         |          |
| 2572232359 | t3m_00715 | Scaffold       | t3m_contig_70_84_len_42953_read_count_3343224.12             |          |
| 2572232359 | t3m_00715 | Coordinates    | 1242..1463(-)                                                |          |
| 2572232359 | t3m_00715 | DNA_length     | 222bp                                                        |          |
| 2572232359 | t3m_00715 | Protein_length | 73aa                                                         |          |
| 2572232359 | t3m_00715 | GC             |                                                              | 0.69     |
| 2572232360 | t3m_00716 | COG_category   | [M] Cell wall/membrane/envelope biogenesis                   |          |
| 2572232360 | t3m_00716 | COG0438        | Glycosyltransferase                                          | 9.00E-29 |
| 2572232360 | t3m_00716 | pfam13692      | Glyco_trans_1_4                                              | 1.90E-19 |
| 2572232360 | t3m_00716 | pfam13579      | Glyco_trans_4_4                                              | 2.40E-10 |
| 2572232360 | t3m_00716 | Locus_type     | CDS                                                          |          |
| 2572232360 | t3m_00716 | Product_name   | Glycosyltransferase                                          |          |
| 2572232360 | t3m_00716 | Scaffold       | t3m_contig_70_84_len_42953_read_count_3343224.12             |          |
| 2572232360 | t3m_00716 | Coordinates    | 1510..2640(+)                                                |          |

|            |           |                |                                                                      |          |
|------------|-----------|----------------|----------------------------------------------------------------------|----------|
| 2572232360 | t3m_00716 | DNA_length     | 1131bp                                                               |          |
| 2572232360 | t3m_00716 | Protein_length | 376aa                                                                |          |
| 2572232360 | t3m_00716 | GC             |                                                                      | 0.68     |
| 2572232361 | t3m_00717 | pfam05050      | Methyltransf_21                                                      | 1.50E-16 |
| 2572232361 | t3m_00717 | TIGR01444      | methyltransferase, FkbM family                                       | 1.30E-24 |
| 2572232361 | t3m_00717 | Locus_type     | CDS                                                                  |          |
| 2572232361 | t3m_00717 | Product_name   | methyltransferase, FkbM family                                       |          |
| 2572232361 | t3m_00717 | Scaffold       | t3m_contig_70_84_len_42953_read_count_3343224.12                     |          |
| 2572232361 | t3m_00717 | Coordinates    | 2759..3640(+)                                                        |          |
| 2572232361 | t3m_00717 | DNA_length     | 882bp                                                                |          |
| 2572232361 | t3m_00717 | Protein_length | 293aa                                                                |          |
| 2572232361 | t3m_00717 | GC             |                                                                      | 0.67     |
| 2572232362 | t3m_00718 | COG_category   | [M] Cell wall/membrane/envelope biogenesis                           |          |
| 2572232362 | t3m_00718 | COG0463        | Glycosyltransferases involved in cell wall biogenesis                | 2.00E-06 |
| 2572232362 | t3m_00718 | pfam00535      | Glycos_transf_2                                                      | 4.00E-12 |
| 2572232362 | t3m_00718 | Locus_type     | CDS                                                                  |          |
| 2572232362 | t3m_00718 | Product_name   | Glycosyltransferases involved in cell wall biogenesis                |          |
| 2572232362 | t3m_00718 | Scaffold       | t3m_contig_70_84_len_42953_read_count_3343224.12                     |          |
| 2572232362 | t3m_00718 | Coordinates    | 3734..4684(-)                                                        |          |
| 2572232362 | t3m_00718 | DNA_length     | 951bp                                                                |          |
| 2572232362 | t3m_00718 | Protein_length | 316aa                                                                |          |
| 2572232362 | t3m_00718 | GC             |                                                                      | 0.67     |
| 2572232363 | t3m_00719 | KEGG_module    | M00361: Nucleotide sugar biosynthesis, eukaryotes                    |          |
| 2572232363 | t3m_00719 | KEGG_module    | M00362: Nucleotide sugar biosynthesis, prokaryotes                   |          |
| 2572232363 | t3m_00719 | Metacyc        | PWY-6397: mycolyl-arabinogalactan-peptidoglycan complex biosynthesis |          |
| 2572232363 | t3m_00719 | Metacyc        | PWY-6317: galactose degradation I (Leloir pathway)                   |          |
| 2572232363 | t3m_00719 | Metacyc        | PWY-6527: stachyose degradation                                      |          |
| 2572232363 | t3m_00719 | Metacyc        | PWY-3821: galactose degradation III                                  |          |
| 2572232363 | t3m_00719 | Metacyc        | COLANSYN-PWY: colanic acid building blocks biosynthesis              |          |
| 2572232363 | t3m_00719 | COG_category   | [M] Cell wall/membrane/envelope biogenesis                           |          |
| 2572232363 | t3m_00719 | COG_category   | [G] Carbohydrate transport and metabolism                            |          |

|            |           |                |                                                              |          |
|------------|-----------|----------------|--------------------------------------------------------------|----------|
| 2572232363 | t3m_00719 | COG0451        | Nucleoside-diphosphate-sugar epimerases                      | 8.00E-31 |
| 2572232363 | t3m_00719 | pfam01370      | Epimerase                                                    | 7.80E-37 |
| 2572232363 | t3m_00719 | EC:5.1.3.2     | UDP-glucose 4-epimerase.                                     |          |
| 2572232363 | t3m_00719 | KO:K01784      | UDP-glucose 4-epimerase [EC:5.1.3.2]                         | 3.30E-39 |
| 2572232363 | t3m_00719 | Locus_type     | CDS                                                          |          |
| 2572232363 | t3m_00719 | Product_name   | Nucleoside-diphosphate-sugar epimerases                      |          |
| 2572232363 | t3m_00719 | Scaffold       | t3m_contig_70_84_len_42953_read_count_3343224.12             |          |
| 2572232363 | t3m_00719 | Coordinates    | 4907..5878(+)                                                |          |
| 2572232363 | t3m_00719 | DNA_length     | 972bp                                                        |          |
| 2572232363 | t3m_00719 | Protein_length | 323aa                                                        |          |
| 2572232363 | t3m_00719 | GC             |                                                              | 0.68     |
| 2572232364 | t3m_00720 | pfam13578      | Methyltransf_24                                              | 1.30E-15 |
| 2572232364 | t3m_00720 | Locus_type     | CDS                                                          |          |
| 2572232364 | t3m_00720 | Product_name   | Methyltransferase domain                                     |          |
| 2572232364 | t3m_00720 | Scaffold       | t3m_contig_70_84_len_42953_read_count_3343224.12             |          |
| 2572232364 | t3m_00720 | Coordinates    | 5920..6639(+)                                                |          |
| 2572232364 | t3m_00720 | DNA_length     | 720bp                                                        |          |
| 2572232364 | t3m_00720 | Protein_length | 239aa                                                        |          |
| 2572232364 | t3m_00720 | GC             |                                                              | 0.71     |
| 2572232365 | t3m_00721 | Locus_type     | CDS                                                          |          |
| 2572232365 | t3m_00721 | Product_name   | hypothetical protein                                         |          |
| 2572232365 | t3m_00721 | Scaffold       | t3m_contig_70_84_len_42953_read_count_3343224.12             |          |
| 2572232365 | t3m_00721 | Coordinates    | 6932..7300(-)                                                |          |
| 2572232365 | t3m_00721 | DNA_length     | 369bp                                                        |          |
| 2572232365 | t3m_00721 | Protein_length | 122aa                                                        |          |
| 2572232365 | t3m_00721 | GC             |                                                              | 0.7      |
| 2572232366 | t3m_00722 | COG_category   | [K] Transcription                                            |          |
| 2572232366 | t3m_00722 | COG1293        | Predicted RNA-binding protein homologous to eukaryotic snRNP | 1.00E-70 |
| 2572232366 | t3m_00722 | pfam05670      | DUF814                                                       | 5.10E-19 |
| 2572232366 | t3m_00722 | pfam05833      | FbpA                                                         | 3.40E-34 |
| 2572232366 | t3m_00722 | Locus_type     | CDS                                                          |          |

|            |           |                |                                                                                                      |          |
|------------|-----------|----------------|------------------------------------------------------------------------------------------------------|----------|
| 2572232366 | t3m_00722 | Product_name   | Predicted RNA-binding protein homologous to eukaryotic snRNP                                         |          |
| 2572232366 | t3m_00722 | Scaffold       | t3m_contig_70_84_len_42953_read_count_3343224.12                                                     |          |
| 2572232366 | t3m_00722 | Coordinates    | 7328..9238(-)                                                                                        |          |
| 2572232366 | t3m_00722 | DNA_length     | 1911bp                                                                                               |          |
| 2572232366 | t3m_00722 | Protein_length | 636aa                                                                                                |          |
| 2572232366 | t3m_00722 | GC             |                                                                                                      | 0.71     |
| 2572232367 | t3m_00723 | COG_category   | [I] Lipid transport and metabolism                                                                   |          |
| 2572232367 | t3m_00723 | COG1960        | Acyl-CoA dehydrogenases                                                                              | 2.00E-65 |
| 2572232367 | t3m_00723 | pfam02770      | Acyl-CoA_dh_M                                                                                        | 5.70E-18 |
| 2572232367 | t3m_00723 | pfam02771      | Acyl-CoA_dh_N                                                                                        | 6.60E-29 |
| 2572232367 | t3m_00723 | pfam00441      | Acyl-CoA_dh_1                                                                                        | 1.40E-27 |
| 2572232367 | t3m_00723 | Locus_type     | CDS                                                                                                  |          |
| 2572232367 | t3m_00723 | Product_name   | Acyl-CoA dehydrogenases                                                                              |          |
| 2572232367 | t3m_00723 | Scaffold       | t3m_contig_70_84_len_42953_read_count_3343224.12                                                     |          |
| 2572232367 | t3m_00723 | Coordinates    | 9310..10449(+)                                                                                       |          |
| 2572232367 | t3m_00723 | DNA_length     | 1140bp                                                                                               |          |
| 2572232367 | t3m_00723 | Protein_length | 379aa                                                                                                |          |
| 2572232367 | t3m_00723 | GC             |                                                                                                      | 0.71     |
| 2572232368 | t3m_00724 | COG_category   | [R] General function prediction only                                                                 |          |
| 2572232368 | t3m_00724 | COG1204        | Superfamily II helicase                                                                              | 0.00E+00 |
| 2572232368 | t3m_00724 | pfam00270      | DEAD                                                                                                 | 1.90E-25 |
| 2572232368 | t3m_00724 | pfam00271      | Helicase_C                                                                                           | 4.20E-10 |
| 2572232368 | t3m_00724 | EC:3.6.4.-     | Hydrolases. Acting on acid anhydrides. Acting on acid anhydrides; involved in cellular and subcellul |          |
| 2572232368 | t3m_00724 | KO:K03726      | helicase [EC:3.6.4.-]                                                                                | 0.00E+00 |
| 2572232368 | t3m_00724 | Locus_type     | CDS                                                                                                  |          |
| 2572232368 | t3m_00724 | Product_name   | Superfamily II helicase                                                                              |          |
| 2572232368 | t3m_00724 | Scaffold       | t3m_contig_70_84_len_42953_read_count_3343224.12                                                     |          |
| 2572232368 | t3m_00724 | Coordinates    | 10471..12774(+)                                                                                      |          |
| 2572232368 | t3m_00724 | DNA_length     | 2304bp                                                                                               |          |
| 2572232368 | t3m_00724 | Protein_length | 767aa                                                                                                |          |
| 2572232368 | t3m_00724 | GC             |                                                                                                      | 0.71     |

|            |           |                |                                                                               |           |
|------------|-----------|----------------|-------------------------------------------------------------------------------|-----------|
| 2572232369 | t3m_00725 | COG_category   | [O] Posttranslational modification, protein turnover, chaperones              |           |
| 2572232369 | t3m_00725 | COG_category   | [L] Replication, recombination and repair                                     |           |
| 2572232369 | t3m_00725 | COG1474        | Cdc6-related protein, AAA superfamily ATPase                                  | 2.00E-12  |
| 2572232369 | t3m_00725 | Locus_type     | CDS                                                                           |           |
| 2572232369 | t3m_00725 | Product_name   | Cdc6-related protein, AAA superfamily ATPase                                  |           |
| 2572232369 | t3m_00725 | Scaffold       | t3m_contig_70_84_len_42953_read_count_3343224.12                              |           |
| 2572232369 | t3m_00725 | Coordinates    | 12647..13849(-)                                                               |           |
| 2572232369 | t3m_00725 | DNA_length     | 1203bp                                                                        |           |
| 2572232369 | t3m_00725 | Protein_length | 400aa                                                                         |           |
| 2572232369 | t3m_00725 | GC             |                                                                               | 0.71      |
| 2572232370 | t3m_00726 | KEGG_module    | M00010: Citrate cycle, first carbon oxidation, oxaloacetate => 2-oxoglutarate |           |
| 2572232370 | t3m_00726 | KEGG_module    | M00009: Citrate cycle (TCA cycle, Krebs cycle)                                |           |
| 2572232370 | t3m_00726 | Metacyc        | PWY-6549: glutamine biosynthesis III                                          |           |
| 2572232370 | t3m_00726 | Metacyc        | PWY-5690: TCA cycle II (eukaryotic)                                           |           |
| 2572232370 | t3m_00726 | COG_category   | [E] Amino acid transport and metabolism                                       |           |
| 2572232370 | t3m_00726 | COG_category   | [C] Energy production and conversion                                          |           |
| 2572232370 | t3m_00726 | COG0473        | Isocitrate/isopropylmalate dehydrogenase                                      | 6.00E-106 |
| 2572232370 | t3m_00726 | pfam00180      | Iso_dh                                                                        | 9.20E-102 |
| 2572232370 | t3m_00726 | EC:1.1.1.41    | Isocitrate dehydrogenase (NAD(+)).                                            |           |
| 2572232370 | t3m_00726 | TIGR00175      | isocitrate dehydrogenase, NAD-dependent, mitochondrial type                   | 2.20E-107 |
| 2572232370 | t3m_00726 | KO:K00030      | isocitrate dehydrogenase (NAD+) [EC:1.1.1.41]                                 | 0.00E+00  |
| 2572232370 | t3m_00726 | Locus_type     | CDS                                                                           |           |
| 2572232370 | t3m_00726 | Product_name   | Isocitrate/isopropylmalate dehydrogenase                                      |           |
| 2572232370 | t3m_00726 | Scaffold       | t3m_contig_70_84_len_42953_read_count_3343224.12                              |           |
| 2572232370 | t3m_00726 | Coordinates    | 14059..15165(+)                                                               |           |
| 2572232370 | t3m_00726 | DNA_length     | 1107bp                                                                        |           |
| 2572232370 | t3m_00726 | Protein_length | 368aa                                                                         |           |
| 2572232370 | t3m_00726 | GC             |                                                                               | 0.69      |
| 2572232371 | t3m_00727 | COG_category   | [S] Function unknown                                                          |           |
| 2572232371 | t3m_00727 | COG0432        | Uncharacterized conserved protein                                             | 3.00E-39  |
| 2572232371 | t3m_00727 | pfam01894      | UPF0047                                                                       | 1.10E-37  |
| 2572232371 | t3m_00727 | TIGR00149      | secondary thiamine-phosphate synthase enzyme                                  | 1.50E-36  |

|            |           |                |                                                  |      |
|------------|-----------|----------------|--------------------------------------------------|------|
| 2572232371 | t3m_00727 | Locus_type     | CDS                                              |      |
| 2572232371 | t3m_00727 | Product_name   | secondary thiamine-phosphate synthase enzyme     |      |
| 2572232371 | t3m_00727 | Scaffold       | t3m_contig_70_84_len_42953_read_count_3343224.12 |      |
| 2572232371 | t3m_00727 | Coordinates    | 15217..15627(-)                                  |      |
| 2572232371 | t3m_00727 | DNA_length     | 411bp                                            |      |
| 2572232371 | t3m_00727 | Protein_length | 136aa                                            |      |
| 2572232371 | t3m_00727 | GC             |                                                  | 0.65 |
|            |           |                |                                                  |      |
| 2572232372 | t3m_00728 | Locus_type     | CDS                                              |      |
| 2572232372 | t3m_00728 | Product_name   | hypothetical protein                             |      |
| 2572232372 | t3m_00728 | Scaffold       | t3m_contig_70_84_len_42953_read_count_3343224.12 |      |
| 2572232372 | t3m_00728 | Coordinates    | 15695..16255(+)                                  |      |
| 2572232372 | t3m_00728 | DNA_length     | 561bp                                            |      |
| 2572232372 | t3m_00728 | Protein_length | 186aa                                            |      |
| 2572232372 | t3m_00728 | GC             |                                                  | 0.7  |
| 2572232372 | t3m_00728 | Transmembrane  | Yes                                              |      |
|            |           |                |                                                  |      |
| 2572232373 | t3m_00729 | Locus_type     | CDS                                              |      |
| 2572232373 | t3m_00729 | Product_name   | hypothetical protein                             |      |
| 2572232373 | t3m_00729 | Scaffold       | t3m_contig_70_84_len_42953_read_count_3343224.12 |      |
| 2572232373 | t3m_00729 | Coordinates    | 16264..16608(-)                                  |      |
| 2572232373 | t3m_00729 | DNA_length     | 345bp                                            |      |
| 2572232373 | t3m_00729 | Protein_length | 114aa                                            |      |
| 2572232373 | t3m_00729 | GC             |                                                  | 0.7  |
|            |           |                |                                                  |      |
| 2572232374 | t3m_00730 | Locus_type     | CDS                                              |      |
| 2572232374 | t3m_00730 | Product_name   | hypothetical protein                             |      |
| 2572232374 | t3m_00730 | Scaffold       | t3m_contig_70_84_len_42953_read_count_3343224.12 |      |
| 2572232374 | t3m_00730 | Coordinates    | 16761..18593(+)                                  |      |
| 2572232374 | t3m_00730 | DNA_length     | 1833bp                                           |      |
| 2572232374 | t3m_00730 | Protein_length | 610aa                                            |      |
| 2572232374 | t3m_00730 | GC             |                                                  | 0.71 |
| 2572232374 | t3m_00730 | Transmembrane  | Yes                                              |      |

|            |           |                |                                                                      |           |
|------------|-----------|----------------|----------------------------------------------------------------------|-----------|
| 2572232375 | t3m_00731 | COG_category   | [R] General function prediction only                                 |           |
| 2572232375 | t3m_00731 | COG1634        | Uncharacterized Rossmann fold enzyme                                 | 3.00E-45  |
| 2572232375 | t3m_00731 | pfam01973      | MAF_flag10                                                           | 3.20E-19  |
| 2572232375 | t3m_00731 | Locus_type     | CDS                                                                  |           |
| 2572232375 | t3m_00731 | Product_name   | Uncharacterized Rossmann fold enzyme                                 |           |
| 2572232375 | t3m_00731 | Scaffold       | t3m_contig_70_84_len_42953_read_count_3343224.12                     |           |
| 2572232375 | t3m_00731 | Coordinates    | 18557..19306(-)                                                      |           |
| 2572232375 | t3m_00731 | DNA_length     | 750bp                                                                |           |
| 2572232375 | t3m_00731 | Protein_length | 249aa                                                                |           |
| 2572232375 | t3m_00731 | GC             |                                                                      | 0.73      |
| 2572232376 | t3m_00732 | COG_category   | [D] Cell cycle control, cell division, chromosome partitioning       |           |
| 2572232376 | t3m_00732 | COG0206        | Cell division GTPase                                                 | 2.00E-97  |
| 2572232376 | t3m_00732 | pfam00091      | Tubulin                                                              | 6.00E-35  |
| 2572232376 | t3m_00732 | pfam12327      | FtsZ_C                                                               | 1.10E-33  |
| 2572232376 | t3m_00732 | TIGR00065      | cell division protein FtsZ                                           | 1.40E-128 |
| 2572232376 | t3m_00732 | KO:K03531      | cell division protein FtsZ                                           | 0.00E+00  |
| 2572232376 | t3m_00732 | Locus_type     | CDS                                                                  |           |
| 2572232376 | t3m_00732 | Product_name   | cell division protein FtsZ                                           |           |
| 2572232376 | t3m_00732 | Scaffold       | t3m_contig_70_84_len_42953_read_count_3343224.12                     |           |
| 2572232376 | t3m_00732 | Coordinates    | 19372..20490(+)                                                      |           |
| 2572232376 | t3m_00732 | DNA_length     | 1119bp                                                               |           |
| 2572232376 | t3m_00732 | Protein_length | 372aa                                                                |           |
| 2572232376 | t3m_00732 | GC             |                                                                      | 0.69      |
| 2572232377 | t3m_00733 | KEGG_module    | M00401: Sec61 complex                                                |           |
| 2572232377 | t3m_00733 | TIGR00327      | protein translocase SEC61 complex gamma subunit, archaeal and eukar  | 1.90E-14  |
| 2572232377 | t3m_00733 | KO:K07342      | protein transport protein SEC61 subunit gamma and related proteins   | 1.40E-10  |
| 2572232377 | t3m_00733 | Locus_type     | CDS                                                                  |           |
| 2572232377 | t3m_00733 | Product_name   | protein translocase SEC61 complex gamma subunit, archaeal and eukary |           |
| 2572232377 | t3m_00733 | Scaffold       | t3m_contig_70_84_len_42953_read_count_3343224.12                     |           |
| 2572232377 | t3m_00733 | Coordinates    | 20499..20744(+)                                                      |           |
| 2572232377 | t3m_00733 | DNA_length     | 246bp                                                                |           |
| 2572232377 | t3m_00733 | Protein_length | 81aa                                                                 |           |

|            |           |                |                                                     |          |
|------------|-----------|----------------|-----------------------------------------------------|----------|
| 2572232377 | t3m_00733 | GC             |                                                     | 0.64     |
| 2572232377 | t3m_00733 | Transmembrane  | Yes                                                 |          |
| 2572232378 | t3m_00734 | COG_category   | [K] Transcription                                   |          |
| 2572232378 | t3m_00734 | COG0250        | Transcription antiterminator                        | 5.00E-19 |
| 2572232378 | t3m_00734 | pfam00467      | KOW                                                 | 6.90E-07 |
| 2572232378 | t3m_00734 | pfam03439      | Spt5-NGN                                            | 1.60E-13 |
| 2572232378 | t3m_00734 | TIGR00405      | ribosomal protein L24p/L26e, archaeal               | 5.80E-49 |
| 2572232378 | t3m_00734 | KO:K02601      | transcriptional antiterminator NusG                 | 4.20E-34 |
| 2572232378 | t3m_00734 | Locus_type     | CDS                                                 |          |
| 2572232378 | t3m_00734 | Product_name   | ribosomal protein L24p/L26e, archaeal               |          |
| 2572232378 | t3m_00734 | Scaffold       | t3m_contig_70_84_len_42953_read_count_3343224.12    |          |
| 2572232378 | t3m_00734 | Coordinates    | 20765..21763(+)                                     |          |
| 2572232378 | t3m_00734 | DNA_length     | 999bp                                               |          |
| 2572232378 | t3m_00734 | Protein_length | 332aa                                               |          |
| 2572232378 | t3m_00734 | GC             |                                                     | 0.7      |
| 2572232379 | t3m_00735 | KEGG_module    | M00179: Ribosome, archaea                           |          |
| 2572232379 | t3m_00735 | KEGG_module    | M00178: Ribosome, bacteria                          |          |
| 2572232379 | t3m_00735 | COG_category   | [J] Translation, ribosomal structure and biogenesis |          |
| 2572232379 | t3m_00735 | COG0080        | Ribosomal protein L11                               | 8.00E-33 |
| 2572232379 | t3m_00735 | pfam03946      | Ribosomal_L11_N                                     | 7.80E-19 |
| 2572232379 | t3m_00735 | pfam00298      | Ribosomal_L11                                       | 4.70E-21 |
| 2572232379 | t3m_00735 | KO:K02867      | large subunit ribosomal protein L11                 | 1.10E-37 |
| 2572232379 | t3m_00735 | ITERM:00227    | LSU ribosomal protein L11P                          |          |
| 2572232379 | t3m_00735 | Locus_type     | CDS                                                 |          |
| 2572232379 | t3m_00735 | Product_name   | LSU ribosomal protein L11P                          |          |
| 2572232379 | t3m_00735 | Scaffold       | t3m_contig_70_84_len_42953_read_count_3343224.12    |          |
| 2572232379 | t3m_00735 | Coordinates    | 21765..22220(+)                                     |          |
| 2572232379 | t3m_00735 | DNA_length     | 456bp                                               |          |
| 2572232379 | t3m_00735 | Protein_length | 151aa                                               |          |
| 2572232379 | t3m_00735 | GC             |                                                     | 0.69     |
| 2572232380 | t3m_00736 | Locus_type     | CDS                                                 |          |



|            |           |                |                                                                       |                                                                       |          |
|------------|-----------|----------------|-----------------------------------------------------------------------|-----------------------------------------------------------------------|----------|
| 2572232380 | t3m_00736 | Product_name   |                                                                       | hypothetical protein                                                  |          |
| 2572232380 | t3m_00736 | Scaffold       |                                                                       | t3m_contig_70_84_len_42953_read_count_3343224.12                      |          |
| 2572232380 | t3m_00736 | Coordinates    |                                                                       | 22220..22516(+)                                                       |          |
| 2572232380 | t3m_00736 | DNA_length     |                                                                       | 297bp                                                                 |          |
| 2572232380 | t3m_00736 | Protein_length |                                                                       | 98aa                                                                  |          |
| 2572232380 | t3m_00736 | GC             |                                                                       |                                                                       | 0.67     |
|            |           |                |                                                                       |                                                                       |          |
| 2572232381 | t3m_00737 | pfam13746      | Fer4_18                                                               |                                                                       | 5.70E-17 |
| 2572232381 | t3m_00737 | Locus_type     |                                                                       | CDS                                                                   |          |
| 2572232381 | t3m_00737 | Product_name   |                                                                       | 4Fe-4S dicluster domain                                               |          |
| 2572232381 | t3m_00737 | Scaffold       |                                                                       | t3m_contig_70_84_len_42953_read_count_3343224.12                      |          |
| 2572232381 | t3m_00737 | Coordinates    |                                                                       | 22859..24013(+)                                                       |          |
| 2572232381 | t3m_00737 | DNA_length     |                                                                       | 1155bp                                                                |          |
| 2572232381 | t3m_00737 | Protein_length |                                                                       | 384aa                                                                 |          |
| 2572232381 | t3m_00737 | GC             |                                                                       |                                                                       | 0.68     |
|            |           |                |                                                                       |                                                                       |          |
| 2572232382 | t3m_00738 | pfam00027      | cNMP_binding                                                          |                                                                       | 1.70E-12 |
| 2572232382 | t3m_00738 | Locus_type     |                                                                       | CDS                                                                   |          |
| 2572232382 | t3m_00738 | Product_name   |                                                                       | Cyclic nucleotide-binding domain                                      |          |
| 2572232382 | t3m_00738 | Scaffold       |                                                                       | t3m_contig_70_84_len_42953_read_count_3343224.12                      |          |
| 2572232382 | t3m_00738 | Coordinates    |                                                                       | 24010..24480(+)                                                       |          |
| 2572232382 | t3m_00738 | DNA_length     |                                                                       | 471bp                                                                 |          |
| 2572232382 | t3m_00738 | Protein_length |                                                                       | 156aa                                                                 |          |
| 2572232382 | t3m_00738 | GC             |                                                                       |                                                                       | 0.65     |
|            |           |                |                                                                       |                                                                       |          |
| 2572232383 | t3m_00739 | COG_category   | [H] Coenzyme transport and metabolism                                 |                                                                       |          |
| 2572232383 | t3m_00739 | COG_category   | [C] Energy production and conversion                                  |                                                                       |          |
| 2572232383 | t3m_00739 | COG0543        | 2-polyprenylphenol hydroxylase and related flavodoxin oxidoreductase: |                                                                       | 8.00E-40 |
| 2572232383 | t3m_00739 | pfam10418      | DHODB_Fe-S_bind                                                       |                                                                       | 1.20E-09 |
| 2572232383 | t3m_00739 | pfam00175      | NAD_binding_1                                                         |                                                                       | 4.00E-17 |
| 2572232383 | t3m_00739 | pfam00970      | FAD_binding_6                                                         |                                                                       | 4.00E-08 |
| 2572232383 | t3m_00739 | Locus_type     |                                                                       | CDS                                                                   |          |
| 2572232383 | t3m_00739 | Product_name   |                                                                       | 2-polyprenylphenol hydroxylase and related flavodoxin oxidoreductases |          |
| 2572232383 | t3m_00739 | Scaffold       |                                                                       | t3m_contig_70_84_len_42953_read_count_3343224.12                      |          |

|            |           |                |                                                   |          |
|------------|-----------|----------------|---------------------------------------------------|----------|
| 2572232383 | t3m_00739 | Coordinates    | 24470..25351(+)                                   |          |
| 2572232383 | t3m_00739 | DNA_length     | 882bp                                             |          |
| 2572232383 | t3m_00739 | Protein_length | 293aa                                             |          |
| 2572232383 | t3m_00739 | GC             |                                                   | 0.69     |
| 2572232384 | t3m_00740 | COG_category   | [C] Energy production and conversion              |          |
| 2572232384 | t3m_00740 | COG1941        | Coenzyme F420-reducing hydrogenase, gamma subunit | 2.00E-36 |
| 2572232384 | t3m_00740 | pfam01058      | Oxidored_q6                                       | 1.40E-22 |
| 2572232384 | t3m_00740 | Locus_type     | CDS                                               |          |
| 2572232384 | t3m_00740 | Product_name   | Coenzyme F420-reducing hydrogenase, gamma subunit |          |
| 2572232384 | t3m_00740 | Scaffold       | t3m_contig_70_84_len_42953_read_count_3343224.12  |          |
| 2572232384 | t3m_00740 | Coordinates    | 25357..26151(+)                                   |          |
| 2572232384 | t3m_00740 | DNA_length     | 795bp                                             |          |
| 2572232384 | t3m_00740 | Protein_length | 264aa                                             |          |
| 2572232384 | t3m_00740 | GC             |                                                   | 0.7      |
| 2572232385 | t3m_00741 | COG_category   | [C] Energy production and conversion              |          |
| 2572232385 | t3m_00741 | COG3259        | Coenzyme F420-reducing hydrogenase, alpha subunit | 1.00E-77 |
| 2572232385 | t3m_00741 | pfam00374      | NiFeSe_Hases                                      | 2.80E-15 |
| 2572232385 | t3m_00741 | pfam00374      | NiFeSe_Hases                                      | 5.40E-10 |
| 2572232385 | t3m_00741 | Locus_type     | CDS                                               |          |
| 2572232385 | t3m_00741 | Product_name   | Coenzyme F420-reducing hydrogenase, alpha subunit |          |
| 2572232385 | t3m_00741 | Scaffold       | t3m_contig_70_84_len_42953_read_count_3343224.12  |          |
| 2572232385 | t3m_00741 | Coordinates    | 26148..27446(+)                                   |          |
| 2572232385 | t3m_00741 | DNA_length     | 1299bp                                            |          |
| 2572232385 | t3m_00741 | Protein_length | 432aa                                             |          |
| 2572232385 | t3m_00741 | GC             |                                                   | 0.67     |
| 2572232386 | t3m_00742 | COG_category   | [C] Energy production and conversion              |          |
| 2572232386 | t3m_00742 | COG0680        | Ni,Fe-hydrogenase maturation factor               | 4.00E-18 |
| 2572232386 | t3m_00742 | pfam01750      | Hycl                                              | 2.50E-14 |
| 2572232386 | t3m_00742 | TIGR00072      | hydrogenase maturation protease                   | 2.70E-36 |
| 2572232386 | t3m_00742 | Locus_type     | CDS                                               |          |
| 2572232386 | t3m_00742 | Product_name   | hydrogenase maturation protease                   |          |

|            |           |                |                                             |                                                  |          |
|------------|-----------|----------------|---------------------------------------------|--------------------------------------------------|----------|
| 2572232386 | t3m_00742 | Scaffold       |                                             | t3m_contig_70_84_len_42953_read_count_3343224.12 |          |
| 2572232386 | t3m_00742 | Coordinates    |                                             | 27457..27975(+)                                  |          |
| 2572232386 | t3m_00742 | DNA_length     |                                             | 519bp                                            |          |
| 2572232386 | t3m_00742 | Protein_length |                                             | 172aa                                            |          |
| 2572232386 | t3m_00742 | GC             |                                             |                                                  | 0.72     |
| 2572232387 | t3m_00743 | pfam01155      | HypA                                        |                                                  | 6.40E-11 |
| 2572232387 | t3m_00743 | Locus_type     |                                             | CDS                                              |          |
| 2572232387 | t3m_00743 | Product_name   |                                             | Hydrogenase expression/synthesis hypA family     |          |
| 2572232387 | t3m_00743 | Scaffold       |                                             | t3m_contig_70_84_len_42953_read_count_3343224.12 |          |
| 2572232387 | t3m_00743 | Coordinates    |                                             | 27968..28246(+)                                  |          |
| 2572232387 | t3m_00743 | DNA_length     |                                             | 279bp                                            |          |
| 2572232387 | t3m_00743 | Protein_length |                                             | 92aa                                             |          |
| 2572232387 | t3m_00743 | GC             |                                             |                                                  | 0.7      |
| 2572232388 | t3m_00744 | Locus_type     |                                             | CDS                                              |          |
| 2572232388 | t3m_00744 | Product_name   |                                             | hypothetical protein                             |          |
| 2572232388 | t3m_00744 | Scaffold       |                                             | t3m_contig_70_84_len_42953_read_count_3343224.12 |          |
| 2572232388 | t3m_00744 | Coordinates    |                                             | 28307..28624(+)                                  |          |
| 2572232388 | t3m_00744 | DNA_length     |                                             | 318bp                                            |          |
| 2572232388 | t3m_00744 | Protein_length |                                             | 105aa                                            |          |
| 2572232388 | t3m_00744 | GC             |                                             |                                                  | 0.69     |
| 2572232388 | t3m_00744 | Transmembrane  |                                             | Yes                                              |          |
| 2572232389 | t3m_00745 | Locus_type     |                                             | CDS                                              |          |
| 2572232389 | t3m_00745 | Product_name   |                                             | hypothetical protein                             |          |
| 2572232389 | t3m_00745 | Scaffold       |                                             | t3m_contig_70_84_len_42953_read_count_3343224.12 |          |
| 2572232389 | t3m_00745 | Coordinates    |                                             | 28618..28779(-)                                  |          |
| 2572232389 | t3m_00745 | DNA_length     |                                             | 162bp                                            |          |
| 2572232389 | t3m_00745 | Protein_length |                                             | 53aa                                             |          |
| 2572232389 | t3m_00745 | GC             |                                             |                                                  | 0.69     |
| 2572232390 | t3m_00746 | COG_category   | [R] General function prediction only        |                                                  |          |
| 2572232390 | t3m_00746 | COG0561        | Predicted hydrolases of the HAD superfamily |                                                  | 9.00E-32 |

|            |           |                |                                                                       |          |
|------------|-----------|----------------|-----------------------------------------------------------------------|----------|
| 2572232390 | t3m_00746 | pfam08282      | Hydrolase_3                                                           | 4.70E-12 |
| 2572232390 | t3m_00746 | pfam08282      | Hydrolase_3                                                           | 1.50E-14 |
| 2572232390 | t3m_00746 | TIGR01484      | HAD-superfamily hydrolase, subfamily IIB                              | 1.10E-16 |
| 2572232390 | t3m_00746 | TIGR01487      | phosphoglycolate phosphatase, TA0175-type                             | 1.80E-44 |
| 2572232390 | t3m_00746 | Locus_type     | CDS                                                                   |          |
| 2572232390 | t3m_00746 | Product_name   | phosphoglycolate phosphatase, TA0175-type                             |          |
| 2572232390 | t3m_00746 | Scaffold       | t3m_contig_70_84_len_42953_read_count_3343224.12                      |          |
| 2572232390 | t3m_00746 | Coordinates    | 28859..29587(-)                                                       |          |
| 2572232390 | t3m_00746 | DNA_length     | 729bp                                                                 |          |
| 2572232390 | t3m_00746 | Protein_length | 242aa                                                                 |          |
| 2572232390 | t3m_00746 | GC             |                                                                       | 0.7      |
| 2572232391 | t3m_00747 | Metacyc        | PWY-5921: L-glutamine biosynthesis II (tRNA-dependent)                |          |
| 2572232391 | t3m_00747 | COG_category   | [J] Translation, ribosomal structure and biogenesis                   |          |
| 2572232391 | t3m_00747 | COG2511        | Archaeal Glu-tRNAGln amidotransferase subunit E (contains GAD domain) | 0.00E+00 |
| 2572232391 | t3m_00747 | pfam02934      | GatB_N                                                                | 2.60E-65 |
| 2572232391 | t3m_00747 | pfam02637      | GatB_Yqey                                                             | 2.30E-12 |
| 2572232391 | t3m_00747 | EC:6.3.5.7     | Glutamyl-tRNA synthase (glutamine-hydrolyzing).                       |          |
| 2572232391 | t3m_00747 | TIGR00134      | glutamyl-tRNA(Gln) amidotransferase, subunit E                        | 0.00E+00 |
| 2572232391 | t3m_00747 | KO:K03330      | glutamyl-tRNA(Gln) amidotransferase subunit E [EC:6.3.5.7]            | 0.00E+00 |
| 2572232391 | t3m_00747 | ITERM:01533    | glutamyl-tRNA(Gln) amidotransferase subunit E (EC 6.3.5.7)            |          |
| 2572232391 | t3m_00747 | Locus_type     | CDS                                                                   |          |
| 2572232391 | t3m_00747 | Product_name   | glutamyl-tRNA(Gln) amidotransferase subunit E (EC 6.3.5.7)            |          |
| 2572232391 | t3m_00747 | Scaffold       | t3m_contig_70_84_len_42953_read_count_3343224.12                      |          |
| 2572232391 | t3m_00747 | Coordinates    | 29607..31478(-)                                                       |          |
| 2572232391 | t3m_00747 | DNA_length     | 1872bp                                                                |          |
| 2572232391 | t3m_00747 | Protein_length | 623aa                                                                 |          |
| 2572232391 | t3m_00747 | GC             |                                                                       | 0.7      |
| 2572232392 | t3m_00748 | Metacyc        | PWY-5921: L-glutamine biosynthesis II (tRNA-dependent)                |          |
| 2572232392 | t3m_00748 | COG_category   | [E] Amino acid transport and metabolism                               |          |
| 2572232392 | t3m_00748 | COG_category   | [J] Translation, ribosomal structure and biogenesis                   |          |
| 2572232392 | t3m_00748 | COG0252        | L-asparaginase/archaeal Glu-tRNAGln amidotransferase subunit D        | 8.00E-82 |
| 2572232392 | t3m_00748 | pfam00710      | Asparaginase                                                          | 1.30E-80 |

|            |           |                |                                                                                     |           |
|------------|-----------|----------------|-------------------------------------------------------------------------------------|-----------|
| 2572232392 | t3m_00748 | EC:6.3.5.7     | Glutaminyl-tRNA synthase (glutamine-hydrolyzing).                                   |           |
| 2572232392 | t3m_00748 | TIGR00519      | L-asparaginase, type I                                                              | 3.70E-96  |
| 2572232392 | t3m_00748 | TIGR02153      | glutamyl-tRNA(Gln) amidotransferase, subunit D                                      | 7.70E-130 |
| 2572232392 | t3m_00748 | KO:K09482      | glutamyl-tRNA(Gln) amidotransferase subunit D [EC:6.3.5.7]                          | 0.00E+00  |
| 2572232392 | t3m_00748 | ITERM:01532    | glutamyl-tRNA(Gln) amidotransferase subunit D (EC 6.3.5.7)                          |           |
| 2572232392 | t3m_00748 | Locus_type     | CDS                                                                                 |           |
| 2572232392 | t3m_00748 | Product_name   | glutamyl-tRNA(Gln) amidotransferase subunit D (EC 6.3.5.7)                          |           |
| 2572232392 | t3m_00748 | Scaffold       | t3m_contig_70_84_len_42953_read_count_3343224.12                                    |           |
| 2572232392 | t3m_00748 | Coordinates    | 31475..32791(-)                                                                     |           |
| 2572232392 | t3m_00748 | DNA_length     | 1317bp                                                                              |           |
| 2572232392 | t3m_00748 | Protein_length | 438aa                                                                               |           |
| 2572232392 | t3m_00748 | GC             |                                                                                     | 0.7       |
|            |           |                |                                                                                     |           |
| 2572232393 | t3m_00749 | Locus_type     | tRNA                                                                                |           |
| 2572232393 | t3m_00749 | Product_name   | tRNA_Pseudo_GCG                                                                     |           |
| 2572232393 | t3m_00749 | Scaffold       | t3m_contig_70_84_len_42953_read_count_3343224.12                                    |           |
| 2572232393 | t3m_00749 | Coordinates    | 32966..33038(+)                                                                     |           |
| 2572232393 | t3m_00749 | DNA_length     | 73bp                                                                                |           |
| 2572232393 | t3m_00749 | GC             |                                                                                     | 0.63      |
|            |           |                |                                                                                     |           |
| 2572232394 | t3m_00750 | KEGG_module    | M00053: Pyrimidine deoxyribonucleotide biosynthesis, CDP/CTP => dCDP/dCTP,dTDP/dTTP |           |
| 2572232394 | t3m_00750 | COG_category   | [F] Nucleotide transport and metabolism                                             |           |
| 2572232394 | t3m_00750 | COG0125        | Thymidylate kinase                                                                  | 1.00E-26  |
| 2572232394 | t3m_00750 | pfam02223      | Thymidylate_kin                                                                     | 1.20E-28  |
| 2572232394 | t3m_00750 | EC:2.7.4.9     | dTMP kinase.                                                                        |           |
| 2572232394 | t3m_00750 | TIGR00041      | thymidylate kinase                                                                  | 5.10E-33  |
| 2572232394 | t3m_00750 | KO:K00943      | dTMP kinase [EC:2.7.4.9]                                                            | 2.30E-19  |
| 2572232394 | t3m_00750 | Locus_type     | CDS                                                                                 |           |
| 2572232394 | t3m_00750 | Product_name   | thymidylate kinase                                                                  |           |
| 2572232394 | t3m_00750 | Scaffold       | t3m_contig_70_84_len_42953_read_count_3343224.12                                    |           |
| 2572232394 | t3m_00750 | Coordinates    | 33283..33873(+)                                                                     |           |
| 2572232394 | t3m_00750 | DNA_length     | 591bp                                                                               |           |
| 2572232394 | t3m_00750 | Protein_length | 196aa                                                                               |           |
| 2572232394 | t3m_00750 | GC             |                                                                                     | 0.64      |

|            |           |                |                                                       |                                                       |          |
|------------|-----------|----------------|-------------------------------------------------------|-------------------------------------------------------|----------|
| 2572232395 | t3m_00751 | pfam05368      | NmrA                                                  |                                                       | 1.40E-23 |
| 2572232395 | t3m_00751 | Locus_type     |                                                       | CDS                                                   |          |
| 2572232395 | t3m_00751 | Product_name   |                                                       | NmrA-like family                                      |          |
| 2572232395 | t3m_00751 | Scaffold       |                                                       | t3m_contig_70_84_len_42953_read_count_3343224.12      |          |
| 2572232395 | t3m_00751 | Coordinates    |                                                       | 34045..34773(-)                                       |          |
| 2572232395 | t3m_00751 | DNA_length     |                                                       | 729bp                                                 |          |
| 2572232395 | t3m_00751 | Protein_length |                                                       | 242aa                                                 |          |
| 2572232395 | t3m_00751 | GC             |                                                       |                                                       | 0.6      |
| 2572232396 | t3m_00752 | COG_category   | [C] Energy production and conversion                  |                                                       |          |
| 2572232396 | t3m_00752 | COG1902        | NADH:flavin oxidoreductases, Old Yellow Enzyme family |                                                       | 2.00E-83 |
| 2572232396 | t3m_00752 | pfam00724      | Oxidored_FMN                                          |                                                       | 8.80E-64 |
| 2572232396 | t3m_00752 | pfam00724      | Oxidored_FMN                                          |                                                       | 5.20E-06 |
| 2572232396 | t3m_00752 | Locus_type     |                                                       | CDS                                                   |          |
| 2572232396 | t3m_00752 | Product_name   |                                                       | NADH:flavin oxidoreductases, Old Yellow Enzyme family |          |
| 2572232396 | t3m_00752 | Scaffold       |                                                       | t3m_contig_70_84_len_42953_read_count_3343224.12      |          |
| 2572232396 | t3m_00752 | Coordinates    |                                                       | 35239..36357(+)                                       |          |
| 2572232396 | t3m_00752 | DNA_length     |                                                       | 1119bp                                                |          |
| 2572232396 | t3m_00752 | Protein_length |                                                       | 372aa                                                 |          |
| 2572232396 | t3m_00752 | GC             |                                                       |                                                       | 0.65     |
| 2572232397 | t3m_00753 | Locus_type     |                                                       | CDS                                                   |          |
| 2572232397 | t3m_00753 | Product_name   |                                                       | hypothetical protein                                  |          |
| 2572232397 | t3m_00753 | Scaffold       |                                                       | t3m_contig_70_84_len_42953_read_count_3343224.12      |          |
| 2572232397 | t3m_00753 | Coordinates    |                                                       | 36670..37068(+)                                       |          |
| 2572232397 | t3m_00753 | DNA_length     |                                                       | 399bp                                                 |          |
| 2572232397 | t3m_00753 | Protein_length |                                                       | 132aa                                                 |          |
| 2572232397 | t3m_00753 | GC             |                                                       |                                                       | 0.62     |
| 2572232397 | t3m_00753 | Transmembrane  |                                                       | Yes                                                   |          |
| 2572232398 | t3m_00754 | Locus_type     |                                                       | CDS                                                   |          |
| 2572232398 | t3m_00754 | Product_name   |                                                       | hypothetical protein                                  |          |
| 2572232398 | t3m_00754 | Scaffold       |                                                       | t3m_contig_70_84_len_42953_read_count_3343224.12      |          |

|            |           |                |              |                                                  |          |
|------------|-----------|----------------|--------------|--------------------------------------------------|----------|
| 2572232398 | t3m_00754 | Coordinates    |              | 37257..38120(+)                                  |          |
| 2572232398 | t3m_00754 | DNA_length     |              | 864bp                                            |          |
| 2572232398 | t3m_00754 | Protein_length |              | 287aa                                            |          |
| 2572232398 | t3m_00754 | GC             |              |                                                  | 0.65     |
| 2572232398 | t3m_00754 | Transmembrane  |              | Yes                                              |          |
|            |           |                |              |                                                  |          |
| 2572232399 | t3m_00755 | Locus_type     |              | CDS                                              |          |
| 2572232399 | t3m_00755 | Product_name   |              | hypothetical protein                             |          |
| 2572232399 | t3m_00755 | Scaffold       |              | t3m_contig_70_84_len_42953_read_count_3343224.12 |          |
| 2572232399 | t3m_00755 | Coordinates    |              | 38307..38486(-)                                  |          |
| 2572232399 | t3m_00755 | DNA_length     |              | 180bp                                            |          |
| 2572232399 | t3m_00755 | Protein_length |              | 59aa                                             |          |
| 2572232399 | t3m_00755 | GC             |              |                                                  | 0.58     |
| 2572232399 | t3m_00755 | Transmembrane  |              | Yes                                              |          |
|            |           |                |              |                                                  |          |
| 2572232400 | t3m_00756 | Locus_type     |              | CDS                                              |          |
| 2572232400 | t3m_00756 | Product_name   |              | hypothetical protein                             |          |
| 2572232400 | t3m_00756 | Scaffold       |              | t3m_contig_70_84_len_42953_read_count_3343224.12 |          |
| 2572232400 | t3m_00756 | Coordinates    |              | 38738..38932(-)                                  |          |
| 2572232400 | t3m_00756 | DNA_length     |              | 195bp                                            |          |
| 2572232400 | t3m_00756 | Protein_length |              | 64aa                                             |          |
| 2572232400 | t3m_00756 | GC             |              |                                                  | 0.59     |
|            |           |                |              |                                                  |          |
| 2572232401 | t3m_00757 | Locus_type     |              | CDS                                              |          |
| 2572232401 | t3m_00757 | Product_name   |              | hypothetical protein                             |          |
| 2572232401 | t3m_00757 | Scaffold       |              | t3m_contig_70_84_len_42953_read_count_3343224.12 |          |
| 2572232401 | t3m_00757 | Coordinates    |              | 39245..39661(-)                                  |          |
| 2572232401 | t3m_00757 | DNA_length     |              | 417bp                                            |          |
| 2572232401 | t3m_00757 | Protein_length |              | 138aa                                            |          |
| 2572232401 | t3m_00757 | GC             |              |                                                  | 0.61     |
| 2572232401 | t3m_00757 | Transmembrane  |              | Yes                                              |          |
|            |           |                |              |                                                  |          |
| 2572232402 | t3m_00758 | pfam00072      | Response_reg |                                                  | 1.40E-20 |
| 2572232402 | t3m_00758 | pfam12840      | HTH_20       |                                                  | 3.40E-08 |

|            |           |                |         |                                                                             |          |
|------------|-----------|----------------|---------|-----------------------------------------------------------------------------|----------|
| 2572232402 | t3m_00758 | Locus_type     |         | CDS                                                                         |          |
| 2572232402 | t3m_00758 | Product_name   |         | Response regulator receiver domain/Helix-turn-helix domain                  |          |
| 2572232402 | t3m_00758 | Scaffold       |         | t3m_contig_70_84_len_42953_read_count_3343224.12                            |          |
| 2572232402 | t3m_00758 | Coordinates    |         | 39947..41005(+)                                                             |          |
| 2572232402 | t3m_00758 | DNA_length     |         | 1059bp                                                                      |          |
| 2572232402 | t3m_00758 | Protein_length |         | 352aa                                                                       |          |
| 2572232402 | t3m_00758 | GC             |         |                                                                             | 0.65     |
|            |           |                |         |                                                                             |          |
| 2572232403 | t3m_00759 | Locus_type     |         | CDS                                                                         |          |
| 2572232403 | t3m_00759 | Product_name   |         | hypothetical protein                                                        |          |
| 2572232403 | t3m_00759 | Scaffold       |         | t3m_contig_70_84_len_42953_read_count_3343224.12                            |          |
| 2572232403 | t3m_00759 | Coordinates    |         | 41158..41346(-)                                                             |          |
| 2572232403 | t3m_00759 | DNA_length     |         | 189bp                                                                       |          |
| 2572232403 | t3m_00759 | Protein_length |         | 62aa                                                                        |          |
| 2572232403 | t3m_00759 | GC             |         |                                                                             | 0.62     |
|            |           |                |         |                                                                             |          |
| 2572232404 | t3m_00760 | Locus_type     |         | CDS                                                                         |          |
| 2572232404 | t3m_00760 | Product_name   |         | hypothetical protein                                                        |          |
| 2572232404 | t3m_00760 | Scaffold       |         | t3m_contig_70_84_len_42953_read_count_3343224.12                            |          |
| 2572232404 | t3m_00760 | Coordinates    |         | 42272..42493(+)                                                             |          |
| 2572232404 | t3m_00760 | DNA_length     |         | 222bp                                                                       |          |
| 2572232404 | t3m_00760 | Protein_length |         | 73aa                                                                        |          |
| 2572232404 | t3m_00760 | GC             |         |                                                                             | 0.61     |
|            |           |                |         |                                                                             |          |
| 2572232405 | t3m_00761 | pfam02933      | CDC48_2 |                                                                             | 1.50E-10 |
| 2572232405 | t3m_00761 | pfam02359      | CDC48_N |                                                                             | 9.50E-22 |
| 2572232405 | t3m_00761 | pfam00004      | AAA     |                                                                             | 1.10E-25 |
| 2572232405 | t3m_00761 | Locus_type     |         | CDS                                                                         |          |
| 2572232405 | t3m_00761 | Product_name   |         | Cell division protein 48 (CDC48), domain 2/Cell division protein 48 (CDC48) |          |
| 2572232405 | t3m_00761 | Scaffold       |         | t3m_contig_70_104_len_38616_read_count_3010148.13                           |          |
| 2572232405 | t3m_00761 | Coordinates    |         | 2..868(-)                                                                   |          |
| 2572232405 | t3m_00761 | DNA_length     |         | 867bp                                                                       |          |
| 2572232405 | t3m_00761 | Protein_length |         | 289aa                                                                       |          |
| 2572232405 | t3m_00761 | GC             |         |                                                                             | 0.68     |



|            |           |                |                                                   |          |
|------------|-----------|----------------|---------------------------------------------------|----------|
| 2572232406 | t3m_00762 | pfam05050      | Methyltransf_21                                   | 8.40E-15 |
| 2572232406 | t3m_00762 | TIGR01444      | methyltransferase, FkbM family                    | 1.90E-26 |
| 2572232406 | t3m_00762 | Locus_type     | CDS                                               |          |
| 2572232406 | t3m_00762 | Product_name   | methyltransferase, FkbM family                    |          |
| 2572232406 | t3m_00762 | Scaffold       | t3m_contig_70_104_len_38616_read_count_3010148.13 |          |
| 2572232406 | t3m_00762 | Coordinates    | 947..1903(-)                                      |          |
| 2572232406 | t3m_00762 | DNA_length     | 957bp                                             |          |
| 2572232406 | t3m_00762 | Protein_length | 318aa                                             |          |
| 2572232406 | t3m_00762 | GC             |                                                   | 0.67     |
|            |           |                |                                                   |          |
| 2572232407 | t3m_00763 | Locus_type     | CDS                                               |          |
| 2572232407 | t3m_00763 | Product_name   | hypothetical protein                              |          |
| 2572232407 | t3m_00763 | Scaffold       | t3m_contig_70_104_len_38616_read_count_3010148.13 |          |
| 2572232407 | t3m_00763 | Coordinates    | 1902..2060(+)                                     |          |
| 2572232407 | t3m_00763 | DNA_length     | 159bp                                             |          |
| 2572232407 | t3m_00763 | Protein_length | 52aa                                              |          |
| 2572232407 | t3m_00763 | GC             |                                                   | 0.7      |
|            |           |                |                                                   |          |
| 2572232408 | t3m_00764 | Locus_type     | CDS                                               |          |
| 2572232408 | t3m_00764 | Product_name   | hypothetical protein                              |          |
| 2572232408 | t3m_00764 | Scaffold       | t3m_contig_70_104_len_38616_read_count_3010148.13 |          |
| 2572232408 | t3m_00764 | Coordinates    | 2249..2461(-)                                     |          |
| 2572232408 | t3m_00764 | DNA_length     | 213bp                                             |          |
| 2572232408 | t3m_00764 | Protein_length | 70aa                                              |          |
| 2572232408 | t3m_00764 | GC             |                                                   | 0.62     |
|            |           |                |                                                   |          |
| 2572232409 | t3m_00765 | pfam08241      | Methyltransf_11                                   | 2.20E-15 |
| 2572232409 | t3m_00765 | Locus_type     | CDS                                               |          |
| 2572232409 | t3m_00765 | Product_name   | Methyltransferase domain                          |          |
| 2572232409 | t3m_00765 | Scaffold       | t3m_contig_70_104_len_38616_read_count_3010148.13 |          |
| 2572232409 | t3m_00765 | Coordinates    | 2647..3378(+)                                     |          |
| 2572232409 | t3m_00765 | DNA_length     | 732bp                                             |          |
| 2572232409 | t3m_00765 | Protein_length | 243aa                                             |          |

|            |           |                |                                                |                                                   |          |
|------------|-----------|----------------|------------------------------------------------|---------------------------------------------------|----------|
| 2572232409 | t3m_00765 | GC             |                                                |                                                   | 0.61     |
| 2572232410 | t3m_00766 | pfam13302      | Acetyltransf_3                                 |                                                   | 1.90E-14 |
| 2572232410 | t3m_00766 | Locus_type     |                                                | CDS                                               |          |
| 2572232410 | t3m_00766 | Product_name   |                                                | Acetyltransferase (GNAT) domain                   |          |
| 2572232410 | t3m_00766 | Scaffold       |                                                | t3m_contig_70_104_len_38616_read_count_3010148.13 |          |
| 2572232410 | t3m_00766 | Coordinates    |                                                | 3413..3712(-)                                     |          |
| 2572232410 | t3m_00766 | DNA_length     |                                                | 300bp                                             |          |
| 2572232410 | t3m_00766 | Protein_length |                                                | 99aa                                              |          |
| 2572232410 | t3m_00766 | GC             |                                                |                                                   | 0.63     |
| 2572232411 | t3m_00767 | COG_category   | [S] Function unknown                           |                                                   |          |
| 2572232411 | t3m_00767 | COG1801        | Uncharacterized conserved protein              |                                                   | 7.00E-43 |
| 2572232411 | t3m_00767 | pfam01904      | DUF72                                          |                                                   | 4.70E-51 |
| 2572232411 | t3m_00767 | Locus_type     |                                                | CDS                                               |          |
| 2572232411 | t3m_00767 | Product_name   |                                                | Uncharacterized conserved protein                 |          |
| 2572232411 | t3m_00767 | Scaffold       |                                                | t3m_contig_70_104_len_38616_read_count_3010148.13 |          |
| 2572232411 | t3m_00767 | Coordinates    |                                                | 4781..5608(-)                                     |          |
| 2572232411 | t3m_00767 | DNA_length     |                                                | 828bp                                             |          |
| 2572232411 | t3m_00767 | Protein_length |                                                | 275aa                                             |          |
| 2572232411 | t3m_00767 | GC             |                                                |                                                   | 0.69     |
| 2572232412 | t3m_00768 | Locus_type     |                                                | CDS                                               |          |
| 2572232412 | t3m_00768 | Product_name   |                                                | hypothetical protein                              |          |
| 2572232412 | t3m_00768 | Scaffold       |                                                | t3m_contig_70_104_len_38616_read_count_3010148.13 |          |
| 2572232412 | t3m_00768 | Coordinates    |                                                | 5746..6660(+)                                     |          |
| 2572232412 | t3m_00768 | DNA_length     |                                                | 915bp                                             |          |
| 2572232412 | t3m_00768 | Protein_length |                                                | 304aa                                             |          |
| 2572232412 | t3m_00768 | GC             |                                                |                                                   | 0.73     |
| 2572232413 | t3m_00769 | Metacyc        | PWY-5386: methylglyoxal degradation I          |                                                   |          |
| 2572232413 | t3m_00769 | COG_category   | [R] General function prediction only           |                                                   |          |
| 2572232413 | t3m_00769 | COG0491        | Zn-dependent hydrolases, including glyoxylases |                                                   | 9.00E-23 |
| 2572232413 | t3m_00769 | pfam00753      | Lactamase_B                                    |                                                   | 8.50E-26 |

|            |           |                |                                                   |          |
|------------|-----------|----------------|---------------------------------------------------|----------|
| 2572232413 | t3m_00769 | EC:3.1.2.6     | Hydroxyacylglutathione hydrolase.                 |          |
| 2572232413 | t3m_00769 | KO:K01069      | hydroxyacylglutathione hydrolase [EC:3.1.2.6]     | 7.00E-39 |
| 2572232413 | t3m_00769 | Locus_type     | CDS                                               |          |
| 2572232413 | t3m_00769 | Product_name   | Zn-dependent hydrolases, including glyoxylases    |          |
| 2572232413 | t3m_00769 | Scaffold       | t3m_contig_70_104_len_38616_read_count_3010148.13 |          |
| 2572232413 | t3m_00769 | Coordinates    | 6704..7315(+)                                     |          |
| 2572232413 | t3m_00769 | DNA_length     | 612bp                                             |          |
| 2572232413 | t3m_00769 | Protein_length | 203aa                                             |          |
| 2572232413 | t3m_00769 | GC             |                                                   | 0.67     |
|            |           |                |                                                   |          |
| 2572232414 | t3m_00770 | COG_category   | [S] Function unknown                              |          |
| 2572232414 | t3m_00770 | COG1617        | Uncharacterized conserved protein                 | 3.00E-08 |
| 2572232414 | t3m_00770 | pfam08617      | CGI-121                                           | 3.20E-07 |
| 2572232414 | t3m_00770 | KO:K09119      | hypothetical protein                              | 2.50E-10 |
| 2572232414 | t3m_00770 | Locus_type     | CDS                                               |          |
| 2572232414 | t3m_00770 | Product_name   | Uncharacterized conserved protein                 |          |
| 2572232414 | t3m_00770 | Scaffold       | t3m_contig_70_104_len_38616_read_count_3010148.13 |          |
| 2572232414 | t3m_00770 | Coordinates    | 7312..7890(+)                                     |          |
| 2572232414 | t3m_00770 | DNA_length     | 579bp                                             |          |
| 2572232414 | t3m_00770 | Protein_length | 192aa                                             |          |
| 2572232414 | t3m_00770 | GC             |                                                   | 0.72     |
|            |           |                |                                                   |          |
| 2572232415 | t3m_00771 | Locus_type     | tRNA                                              |          |
| 2572232415 | t3m_00771 | Product_name   | tRNA_Gly_TCC                                      |          |
| 2572232415 | t3m_00771 | Scaffold       | t3m_contig_70_104_len_38616_read_count_3010148.13 |          |
| 2572232415 | t3m_00771 | Coordinates    | 7931..7999(+)                                     |          |
| 2572232415 | t3m_00771 | DNA_length     | 69bp                                              |          |
| 2572232415 | t3m_00771 | GC             |                                                   | 0.58     |
|            |           |                |                                                   |          |
| 2572232416 | t3m_00772 | Locus_type     | tRNA                                              |          |
| 2572232416 | t3m_00772 | Product_name   | tRNA_Ser_TGA                                      |          |
| 2572232416 | t3m_00772 | Scaffold       | t3m_contig_70_104_len_38616_read_count_3010148.13 |          |
| 2572232416 | t3m_00772 | Coordinates    | 8098..8181(+)                                     |          |
| 2572232416 | t3m_00772 | DNA_length     | 84bp                                              |          |

|            |           |                |                                                   |          |
|------------|-----------|----------------|---------------------------------------------------|----------|
| 2572232416 | t3m_00772 | GC             |                                                   | 0.65     |
| 2572232417 | t3m_00773 | IMG_pathway    | 241: Methyl-directed mismatch repair              |          |
| 2572232417 | t3m_00773 | COG_category   | [L] Replication, recombination and repair         |          |
| 2572232417 | t3m_00773 | COG0249        | Mismatch repair ATPase (MutS family)              | 0.00E+00 |
| 2572232417 | t3m_00773 | pfam01624      | MutS_I                                            | 6.20E-38 |
| 2572232417 | t3m_00773 | pfam00488      | MutS_V                                            | 1.40E-90 |
| 2572232417 | t3m_00773 | pfam05190      | MutS_IV                                           | 1.20E-21 |
| 2572232417 | t3m_00773 | pfam05192      | MutS_III                                          | 5.20E-34 |
| 2572232417 | t3m_00773 | TIGR01070      | DNA mismatch repair protein MutS                  | 0.00E+00 |
| 2572232417 | t3m_00773 | KO:K03555      | DNA mismatch repair protein MutS                  | 0.00E+00 |
| 2572232417 | t3m_00773 | ITERM:00607    | DNA mismatch repair protein MutS                  |          |
| 2572232417 | t3m_00773 | Locus_type     | CDS                                               |          |
| 2572232417 | t3m_00773 | Product_name   | DNA mismatch repair protein MutS                  |          |
| 2572232417 | t3m_00773 | Scaffold       | t3m_contig_70_104_len_38616_read_count_3010148.13 |          |
| 2572232417 | t3m_00773 | Coordinates    | 8237..10864(+)                                    |          |
| 2572232417 | t3m_00773 | DNA_length     | 2628bp                                            |          |
| 2572232417 | t3m_00773 | Protein_length | 875aa                                             |          |
| 2572232417 | t3m_00773 | GC             |                                                   | 0.71     |
| 2572232418 | t3m_00774 | IMG_pathway    | 241: Methyl-directed mismatch repair              |          |
| 2572232418 | t3m_00774 | COG_category   | [L] Replication, recombination and repair         |          |
| 2572232418 | t3m_00774 | COG0323        | DNA mismatch repair enzyme (predicted ATPase)     | 0.00E+00 |
| 2572232418 | t3m_00774 | pfam02518      | HATPase_c                                         | 5.70E-09 |
| 2572232418 | t3m_00774 | pfam08676      | MutL_C                                            | 9.00E-33 |
| 2572232418 | t3m_00774 | pfam01119      | DNA_mis_repair                                    | 6.70E-28 |
| 2572232418 | t3m_00774 | TIGR00585      | DNA mismatch repair protein MutL                  | 2.90E-84 |
| 2572232418 | t3m_00774 | KO:K03572      | DNA mismatch repair protein MutL                  | 0.00E+00 |
| 2572232418 | t3m_00774 | ITERM:00608    | DNA mismatch repair protein MutL                  |          |
| 2572232418 | t3m_00774 | Locus_type     | CDS                                               |          |
| 2572232418 | t3m_00774 | Product_name   | DNA mismatch repair protein MutL                  |          |
| 2572232418 | t3m_00774 | Scaffold       | t3m_contig_70_104_len_38616_read_count_3010148.13 |          |
| 2572232418 | t3m_00774 | Coordinates    | 10861..12639(+)                                   |          |
| 2572232418 | t3m_00774 | DNA_length     | 1779bp                                            |          |

|            |           |                |                                                   |          |
|------------|-----------|----------------|---------------------------------------------------|----------|
| 2572232418 | t3m_00774 | Protein_length | 592aa                                             |          |
| 2572232418 | t3m_00774 | GC             |                                                   | 0.73     |
| 2572232419 | t3m_00775 | Locus_type     | CDS                                               |          |
| 2572232419 | t3m_00775 | Product_name   | hypothetical protein                              |          |
| 2572232419 | t3m_00775 | Scaffold       | t3m_contig_70_104_len_38616_read_count_3010148.13 |          |
| 2572232419 | t3m_00775 | Coordinates    | 12636..13196(+)                                   |          |
| 2572232419 | t3m_00775 | DNA_length     | 561bp                                             |          |
| 2572232419 | t3m_00775 | Protein_length | 186aa                                             |          |
| 2572232419 | t3m_00775 | GC             |                                                   | 0.73     |
| 2572232420 | t3m_00776 | COG_category   | [M] Cell wall/membrane/envelope biogenesis        |          |
| 2572232420 | t3m_00776 | COG0438        | Glycosyltransferase                               | 2.00E-12 |
| 2572232420 | t3m_00776 | pfam13692      | Glyco_trans_1_4                                   | 5.90E-11 |
| 2572232420 | t3m_00776 | pfam13579      | Glyco_trans_4_4                                   | 1.50E-11 |
| 2572232420 | t3m_00776 | Locus_type     | CDS                                               |          |
| 2572232420 | t3m_00776 | Product_name   | Glycosyltransferase                               |          |
| 2572232420 | t3m_00776 | Scaffold       | t3m_contig_70_104_len_38616_read_count_3010148.13 |          |
| 2572232420 | t3m_00776 | Coordinates    | 13215..14384(-)                                   |          |
| 2572232420 | t3m_00776 | DNA_length     | 1170bp                                            |          |
| 2572232420 | t3m_00776 | Protein_length | 389aa                                             |          |
| 2572232420 | t3m_00776 | GC             |                                                   | 0.74     |
| 2572232421 | t3m_00777 | COG_category   | [S] Function unknown                              |          |
| 2572232421 | t3m_00777 | COG3379        | Uncharacterized conserved protein                 | 3.00E-40 |
| 2572232421 | t3m_00777 | pfam01663      | Phosphodiester                                    | 2.80E-38 |
| 2572232421 | t3m_00777 | Locus_type     | CDS                                               |          |
| 2572232421 | t3m_00777 | Product_name   | Uncharacterized conserved protein                 |          |
| 2572232421 | t3m_00777 | Scaffold       | t3m_contig_70_104_len_38616_read_count_3010148.13 |          |
| 2572232421 | t3m_00777 | Coordinates    | 14415..15917(-)                                   |          |
| 2572232421 | t3m_00777 | DNA_length     | 1503bp                                            |          |
| 2572232421 | t3m_00777 | Protein_length | 500aa                                             |          |
| 2572232421 | t3m_00777 | GC             |                                                   | 0.69     |

|            |           |                |                                                                                |          |
|------------|-----------|----------------|--------------------------------------------------------------------------------|----------|
| 2572232422 | t3m_00778 | COG_category   | [R] General function prediction only                                           |          |
| 2572232422 | t3m_00778 | COG1782        | Predicted metal-dependent RNase, consists of a metallo-beta-lactamas           | 0.00E+00 |
| 2572232422 | t3m_00778 | pfam10996      | Beta-Casp                                                                      | 2.70E-33 |
| 2572232422 | t3m_00778 | pfam00753      | Lactamase_B                                                                    | 3.90E-23 |
| 2572232422 | t3m_00778 | pfam07521      | RMMBL                                                                          | 1.70E-12 |
| 2572232422 | t3m_00778 | TIGR03675      | arCOG00543 universal archaeal KH-domain/beta-lactamase-domain prc              | 0.00E+00 |
| 2572232422 | t3m_00778 | Locus_type     | CDS                                                                            |          |
| 2572232422 | t3m_00778 | Product_name   | arCOG00543 universal archaeal KH-domain/beta-lactamase-domain pro              |          |
| 2572232422 | t3m_00778 | Scaffold       | t3m_contig_70_104_len_38616_read_count_3010148.13                              |          |
| 2572232422 | t3m_00778 | Coordinates    | 16021..17925(-)                                                                |          |
| 2572232422 | t3m_00778 | DNA_length     | 1905bp                                                                         |          |
| 2572232422 | t3m_00778 | Protein_length | 634aa                                                                          |          |
| 2572232422 | t3m_00778 | GC             |                                                                                | 0.66     |
| 2572232423 | t3m_00779 | KEGG_module    | M00342: Bacterial proteasome                                                   |          |
| 2572232423 | t3m_00779 | KEGG_module    | M00343: Archaeal proteasome                                                    |          |
| 2572232423 | t3m_00779 | COG_category   | [O] Posttranslational modification, protein turnover, chaperones               |          |
| 2572232423 | t3m_00779 | COG0638        | 20S proteasome, alpha and beta subunits                                        | 1.00E-52 |
| 2572232423 | t3m_00779 | pfam00227      | Proteasome                                                                     | 2.10E-52 |
| 2572232423 | t3m_00779 | EC:3.4.25.1    | Proteasome endopeptidase complex.                                              |          |
| 2572232423 | t3m_00779 | TIGR03634      | proteasome endopeptidase complex, archaeal, beta subunit                       | 2.00E-78 |
| 2572232423 | t3m_00779 | KO:K03433      | proteasome beta subunit [EC:3.4.25.1]                                          | 0.00E+00 |
| 2572232423 | t3m_00779 | Locus_type     | CDS                                                                            |          |
| 2572232423 | t3m_00779 | Product_name   | proteasome endopeptidase complex, beta component (EC 3.4.25.1). Thr            |          |
| 2572232423 | t3m_00779 | Scaffold       | t3m_contig_70_104_len_38616_read_count_3010148.13                              |          |
| 2572232423 | t3m_00779 | Coordinates    | 17990..18655(-)                                                                |          |
| 2572232423 | t3m_00779 | DNA_length     | 666bp                                                                          |          |
| 2572232423 | t3m_00779 | Protein_length | 221aa                                                                          |          |
| 2572232423 | t3m_00779 | GC             |                                                                                | 0.65     |
| 2572232424 | t3m_00780 | KEGG_module    | M00009: Citrate cycle (TCA cycle, Krebs cycle)                                 |          |
| 2572232424 | t3m_00780 | KEGG_module    | M00173: Reductive citric acid cycle (Arnon-Buchanan cycle)                     |          |
| 2572232424 | t3m_00780 | KEGG_module    | M00011: Citrate cycle, second carbon oxidation, 2-oxoglutarate => oxaloacetate |          |
| 2572232424 | t3m_00780 | KEGG_module    | M00374: Dicarboxylate-hydroxybutyrate cycle                                    |          |

|            |           |                |                                                                                |           |
|------------|-----------|----------------|--------------------------------------------------------------------------------|-----------|
| 2572232424 | t3m_00780 | KEGG_module    | M00376: 3-Hydroxypropionate bicycle                                            |           |
| 2572232424 | t3m_00780 | KEGG_module    | M00149: Succinate dehydrogenase, prokaryotes                                   |           |
| 2572232424 | t3m_00780 | Metacyc        | P42-PWY: incomplete reductive TCA cycle                                        |           |
| 2572232424 | t3m_00780 | Metacyc        | PWY-5392: reductive TCA cycle II                                               |           |
| 2572232424 | t3m_00780 | Metacyc        | PWY-6969: TCA cycle V (2-oxoglutarate:ferredoxin oxidoreductase)               |           |
| 2572232424 | t3m_00780 | Metacyc        | P23-PWY: reductive TCA cycle I                                                 |           |
| 2572232424 | t3m_00780 | Metacyc        | P105-PWY: TCA cycle IV (2-oxoglutarate decarboxylase)                          |           |
| 2572232424 | t3m_00780 | COG_category   | [C] Energy production and conversion                                           |           |
| 2572232424 | t3m_00780 | COG1053        | Succinate dehydrogenase/fumarate reductase, flavoprotein subunit               | 0.00E+00  |
| 2572232424 | t3m_00780 | pfam02910      | Succ_DH_flav_C                                                                 | 2.20E-43  |
| 2572232424 | t3m_00780 | pfam00890      | FAD_binding_2                                                                  | 3.30E-107 |
| 2572232424 | t3m_00780 | EC:1.3.99.1    | Succinate dehydrogenase.                                                       |           |
| 2572232424 | t3m_00780 | TIGR01812      | succinate dehydrogenase or fumarate reductase, flavoprotein subunitG           | 0.00E+00  |
| 2572232424 | t3m_00780 | KO:K00239      | succinate dehydrogenase flavoprotein subunit [EC:1.3.99.1]                     | 0.00E+00  |
| 2572232424 | t3m_00780 | ITERM:01372    | succinate dehydrogenase subunit A (EC 1.3.5.1)                                 |           |
| 2572232424 | t3m_00780 | Locus_type     | CDS                                                                            |           |
| 2572232424 | t3m_00780 | Product_name   | succinate dehydrogenase subunit A (EC 1.3.5.1)                                 |           |
| 2572232424 | t3m_00780 | Scaffold       | t3m_contig_70_104_len_38616_read_count_3010148.13                              |           |
| 2572232424 | t3m_00780 | Coordinates    | 18854..20536(+)                                                                |           |
| 2572232424 | t3m_00780 | DNA_length     | 1683bp                                                                         |           |
| 2572232424 | t3m_00780 | Protein_length | 560aa                                                                          |           |
| 2572232424 | t3m_00780 | GC             |                                                                                | 0.68      |
| 2572232425 | t3m_00781 | KEGG_module    | M00011: Citrate cycle, second carbon oxidation, 2-oxoglutarate => oxaloacetate |           |
| 2572232425 | t3m_00781 | KEGG_module    | M00149: Succinate dehydrogenase, prokaryotes                                   |           |
| 2572232425 | t3m_00781 | KEGG_module    | M00009: Citrate cycle (TCA cycle, Krebs cycle)                                 |           |
| 2572232425 | t3m_00781 | Metacyc        | PWY-5392: reductive TCA cycle II                                               |           |
| 2572232425 | t3m_00781 | Metacyc        | PWY-6969: TCA cycle V (2-oxoglutarate:ferredoxin oxidoreductase)               |           |
| 2572232425 | t3m_00781 | Metacyc        | P42-PWY: incomplete reductive TCA cycle                                        |           |
| 2572232425 | t3m_00781 | Metacyc        | P23-PWY: reductive TCA cycle I                                                 |           |
| 2572232425 | t3m_00781 | Metacyc        | P105-PWY: TCA cycle IV (2-oxoglutarate decarboxylase)                          |           |
| 2572232425 | t3m_00781 | COG_category   | [C] Energy production and conversion                                           |           |
| 2572232425 | t3m_00781 | COG0479        | Succinate dehydrogenase/fumarate reductase, Fe-S protein subunit               | 8.00E-60  |
| 2572232425 | t3m_00781 | pfam13085      | Fer2_3                                                                         | 2.60E-30  |

|            |           |                |                                                                    |          |
|------------|-----------|----------------|--------------------------------------------------------------------|----------|
| 2572232425 | t3m_00781 | pfam13183      | Fer4_8                                                             | 4.20E-11 |
| 2572232425 | t3m_00781 | EC:1.3.99.1    | Succinate dehydrogenase.                                           |          |
| 2572232425 | t3m_00781 | TIGR00384      | succinate dehydrogenase and fumarate reductase iron-sulfur protein | 1.80E-73 |
| 2572232425 | t3m_00781 | KO:K00240      | succinate dehydrogenase iron-sulfur subunit [EC:1.3.99.1]          | 0.00E+00 |
| 2572232425 | t3m_00781 | Locus_type     | CDS                                                                |          |
| 2572232425 | t3m_00781 | Product_name   | succinate dehydrogenase and fumarate reductase iron-sulfur protein |          |
| 2572232425 | t3m_00781 | Scaffold       | t3m_contig_70_104_len_38616_read_count_3010148.13                  |          |
| 2572232425 | t3m_00781 | Coordinates    | 20536..21510(+)                                                    |          |
| 2572232425 | t3m_00781 | DNA_length     | 975bp                                                              |          |
| 2572232425 | t3m_00781 | Protein_length | 324aa                                                              |          |
| 2572232425 | t3m_00781 | GC             |                                                                    | 0.67     |
| 2572232426 | t3m_00782 | KEGG_module    | M00561: Methanogenesis, trimethylamine => methane                  |          |
| 2572232426 | t3m_00782 | KEGG_module    | M00567: Methanogenesis, CO2 => methane                             |          |
| 2572232426 | t3m_00782 | KEGG_module    | M00562: Methanogenesis, dimethylamine => methane                   |          |
| 2572232426 | t3m_00782 | KEGG_module    | M00347: Methanogenesis, formate => methane                         |          |
| 2572232426 | t3m_00782 | KEGG_module    | M00563: Methanogenesis, methylamine => methane                     |          |
| 2572232426 | t3m_00782 | KEGG_module    | M00357: Methanogenesis, acetate => methane                         |          |
| 2572232426 | t3m_00782 | KEGG_module    | M00356: Methanogenesis, methanol => methane                        |          |
| 2572232426 | t3m_00782 | Metacyc        | PWY-5207: coenzyme B/coenzyme M regeneration                       |          |
| 2572232426 | t3m_00782 | COG_category   | [C] Energy production and conversion                               |          |
| 2572232426 | t3m_00782 | COG2048        | Heterodisulfide reductase, subunit B                               | 9.00E-76 |
| 2572232426 | t3m_00782 | pfam02754      | CCG                                                                | 2.40E-15 |
| 2572232426 | t3m_00782 | pfam02754      | CCG                                                                | 7.40E-13 |
| 2572232426 | t3m_00782 | EC:1.8.98.1    | CoB--CoM heterodisulfide reductase.                                |          |
| 2572232426 | t3m_00782 | KO:K03389      | heterodisulfide reductase subunit B [EC:1.8.98.1]                  | 0.00E+00 |
| 2572232426 | t3m_00782 | Locus_type     | CDS                                                                |          |
| 2572232426 | t3m_00782 | Product_name   | Heterodisulfide reductase, subunit B                               |          |
| 2572232426 | t3m_00782 | Scaffold       | t3m_contig_70_104_len_38616_read_count_3010148.13                  |          |
| 2572232426 | t3m_00782 | Coordinates    | 21507..22391(+)                                                    |          |
| 2572232426 | t3m_00782 | DNA_length     | 885bp                                                              |          |
| 2572232426 | t3m_00782 | Protein_length | 294aa                                                              |          |
| 2572232426 | t3m_00782 | GC             |                                                                    | 0.68     |



|            |           |                |                                                             |           |
|------------|-----------|----------------|-------------------------------------------------------------|-----------|
| 2572232427 | t3m_00783 | COG_category   | [J] Translation, ribosomal structure and biogenesis         |           |
| 2572232427 | t3m_00783 | COG0251        | Putative translation initiation inhibitor, yjgF family      | 7.00E-25  |
| 2572232427 | t3m_00783 | pfam01042      | Ribonuc_L-PSP                                               | 5.10E-29  |
| 2572232427 | t3m_00783 | Locus_type     | CDS                                                         |           |
| 2572232427 | t3m_00783 | Product_name   | Putative translation initiation inhibitor, yjgF family      |           |
| 2572232427 | t3m_00783 | Scaffold       | t3m_contig_70_104_len_38616_read_count_3010148.13           |           |
| 2572232427 | t3m_00783 | Coordinates    | 22351..22797(+)                                             |           |
| 2572232427 | t3m_00783 | DNA_length     | 447bp                                                       |           |
| 2572232427 | t3m_00783 | Protein_length | 148aa                                                       |           |
| 2572232427 | t3m_00783 | GC             |                                                             | 0.71      |
|            |           |                |                                                             |           |
| 2572232428 | t3m_00784 | Locus_type     | CDS                                                         |           |
| 2572232428 | t3m_00784 | Product_name   | hypothetical protein                                        |           |
| 2572232428 | t3m_00784 | Scaffold       | t3m_contig_70_104_len_38616_read_count_3010148.13           |           |
| 2572232428 | t3m_00784 | Coordinates    | 22850..23149(-)                                             |           |
| 2572232428 | t3m_00784 | DNA_length     | 300bp                                                       |           |
| 2572232428 | t3m_00784 | Protein_length | 99aa                                                        |           |
| 2572232428 | t3m_00784 | GC             |                                                             | 0.66      |
|            |           |                |                                                             |           |
| 2572232429 | t3m_00785 | Locus_type     | CDS                                                         |           |
| 2572232429 | t3m_00785 | Product_name   | hypothetical protein                                        |           |
| 2572232429 | t3m_00785 | Scaffold       | t3m_contig_70_104_len_38616_read_count_3010148.13           |           |
| 2572232429 | t3m_00785 | Coordinates    | 23159..23356(-)                                             |           |
| 2572232429 | t3m_00785 | DNA_length     | 198bp                                                       |           |
| 2572232429 | t3m_00785 | Protein_length | 65aa                                                        |           |
| 2572232429 | t3m_00785 | GC             |                                                             | 0.64      |
|            |           |                |                                                             |           |
| 2572232430 | t3m_00786 | KEGG_module    | M00050: Guanine ribonucleotide biosynthesis IMP => GDP,GTP  |           |
| 2572232430 | t3m_00786 | Metacyc        | PWY-841: purine nucleotides <i>de novo</i> biosynthesis II  |           |
| 2572232430 | t3m_00786 | Metacyc        | PWY-6125: guanosine nucleotides <i>de novo</i> biosynthesis |           |
| 2572232430 | t3m_00786 | IMG_pathway    | 295: Guanylate (GMP) biosynthesis via glutamine             |           |
| 2572232430 | t3m_00786 | COG_category   | [F] Nucleotide transport and metabolism                     |           |
| 2572232430 | t3m_00786 | COG0519        | GMP synthase, PP-ATPase domain/subunit                      | 9.00E-113 |
| 2572232430 | t3m_00786 | pfam00958      | GMP_synt_C                                                  | 7.10E-31  |

|            |           |                |                                                                      |           |
|------------|-----------|----------------|----------------------------------------------------------------------|-----------|
| 2572232430 | t3m_00786 | EC:6.3.5.2     | GMP synthase (glutamine-hydrolyzing).                                |           |
| 2572232430 | t3m_00786 | TIGR00884      | GMP synthase (glutamine-hydrolyzing), C-terminal domain or B subunit | 9.50E-122 |
| 2572232430 | t3m_00786 | KO:K01951      | GMP synthase (glutamine-hydrolyzing) [EC:6.3.5.2]                    | 0.00E+00  |
| 2572232430 | t3m_00786 | ITERM:01286    | GMP synthase (glutamine-hydrolyzing) (EC 6.3.5.2)                    |           |
| 2572232430 | t3m_00786 | Locus_type     | CDS                                                                  |           |
| 2572232430 | t3m_00786 | Product_name   | GMP synthase (glutamine-hydrolyzing) (EC 6.3.5.2)                    |           |
| 2572232430 | t3m_00786 | Scaffold       | t3m_contig_70_104_len_38616_read_count_3010148.13                    |           |
| 2572232430 | t3m_00786 | Coordinates    | 23446..24393(-)                                                      |           |
| 2572232430 | t3m_00786 | DNA_length     | 948bp                                                                |           |
| 2572232430 | t3m_00786 | Protein_length | 315aa                                                                |           |
| 2572232430 | t3m_00786 | GC             |                                                                      | 0.71      |
|            |           |                |                                                                      |           |
| 2572232431 | t3m_00787 | KEGG_module    | M00048: Inosine monophosphate biosynthesis, PRPP + glutamine => IMP  |           |
| 2572232431 | t3m_00787 | Metacyc        | PWY-6123: inosine-5'-phosphate biosynthesis I                        |           |
| 2572232431 | t3m_00787 | COG_category   | [F] Nucleotide transport and metabolism                              |           |
| 2572232431 | t3m_00787 | COG0041        | Phosphoribosylcarboxyaminoimidazole (NCAIR) mutase                   | 7.00E-38  |
| 2572232431 | t3m_00787 | pfam00731      | AIRC                                                                 | 2.50E-47  |
| 2572232431 | t3m_00787 | EC:5.4.99.18   | 5-(carboxyamino)imidazole ribonucleotide mutase.                     |           |
| 2572232431 | t3m_00787 | TIGR01162      | phosphoribosylaminoimidazole carboxylase, PurE protein               | 2.80E-53  |
| 2572232431 | t3m_00787 | KO:K01588      | 5-(carboxyamino)imidazole ribonucleotide mutase [EC:5.4.99.18]       | 5.00E-38  |
| 2572232431 | t3m_00787 | Locus_type     | CDS                                                                  |           |
| 2572232431 | t3m_00787 | Product_name   | phosphoribosylaminoimidazole carboxylase, PurE protein               |           |
| 2572232431 | t3m_00787 | Scaffold       | t3m_contig_70_104_len_38616_read_count_3010148.13                    |           |
| 2572232431 | t3m_00787 | Coordinates    | 24390..24851(-)                                                      |           |
| 2572232431 | t3m_00787 | DNA_length     | 462bp                                                                |           |
| 2572232431 | t3m_00787 | Protein_length | 153aa                                                                |           |
| 2572232431 | t3m_00787 | GC             |                                                                      | 0.71      |
|            |           |                |                                                                      |           |
| 2572232432 | t3m_00788 | Locus_type     | CDS                                                                  |           |
| 2572232432 | t3m_00788 | Product_name   | hypothetical protein                                                 |           |
| 2572232432 | t3m_00788 | Scaffold       | t3m_contig_70_104_len_38616_read_count_3010148.13                    |           |
| 2572232432 | t3m_00788 | Coordinates    | 24933..25586(+)                                                      |           |
| 2572232432 | t3m_00788 | DNA_length     | 654bp                                                                |           |
| 2572232432 | t3m_00788 | Protein_length | 217aa                                                                |           |

|            |           |                |                                                            |          |
|------------|-----------|----------------|------------------------------------------------------------|----------|
| 2572232432 | t3m_00788 | GC             |                                                            | 0.7      |
| 2572232432 | t3m_00788 | Transmembrane  | Yes                                                        |          |
| 2572232433 | t3m_00789 | COG_category   | [T] Signal transduction mechanisms                         |          |
| 2572232433 | t3m_00789 | COG0467        | RecA-superfamily ATPases implicated in signal transduction | 6.00E-08 |
| 2572232433 | t3m_00789 | pfam07088      | GvpD                                                       | 8.50E-40 |
| 2572232433 | t3m_00789 | Locus_type     | CDS                                                        |          |
| 2572232433 | t3m_00789 | Product_name   | RecA-superfamily ATPases implicated in signal transduction |          |
| 2572232433 | t3m_00789 | Scaffold       | t3m_contig_70_104_len_38616_read_count_3010148.13          |          |
| 2572232433 | t3m_00789 | Coordinates    | 25603..27150(-)                                            |          |
| 2572232433 | t3m_00789 | DNA_length     | 1548bp                                                     |          |
| 2572232433 | t3m_00789 | Protein_length | 515aa                                                      |          |
| 2572232433 | t3m_00789 | GC             |                                                            | 0.67     |
| 2572232434 | t3m_00790 | KEGG_module    | M00360: Aminoacyl-tRNA biosynthesis, prokaryotes           |          |
| 2572232434 | t3m_00790 | KEGG_module    | M00359: Aminoacyl-tRNA biosynthesis, eukaryotes            |          |
| 2572232434 | t3m_00790 | Metacyc        | TRNA-CHARGING-PWY: tRNA charging                           |          |
| 2572232434 | t3m_00790 | IMG_pathway    | 487: L-alanine ligation to tRNA(Ala)                       |          |
| 2572232434 | t3m_00790 | COG_category   | [J] Translation, ribosomal structure and biogenesis        |          |
| 2572232434 | t3m_00790 | COG0013        | Alanyl-tRNA synthetase                                     | 0.00E+00 |
| 2572232434 | t3m_00790 | pfam01411      | tRNA-synt_2c                                               | 1.90E-49 |
| 2572232434 | t3m_00790 | pfam01411      | tRNA-synt_2c                                               | 7.70E-33 |
| 2572232434 | t3m_00790 | pfam07973      | tRNA_SAD                                                   | 8.40E-11 |
| 2572232434 | t3m_00790 | EC:6.1.1.7     | Alanine--tRNA ligase.                                      |          |
| 2572232434 | t3m_00790 | TIGR00344      | alanine--tRNA ligase                                       | 0.00E+00 |
| 2572232434 | t3m_00790 | KO:K01872      | alanyl-tRNA synthetase [EC:6.1.1.7]                        | 0.00E+00 |
| 2572232434 | t3m_00790 | ITERM:00391    | alanyl-tRNA synthetase (EC 6.1.1.7)                        |          |
| 2572232434 | t3m_00790 | Locus_type     | CDS                                                        |          |
| 2572232434 | t3m_00790 | Product_name   | alanyl-tRNA synthetase (EC 6.1.1.7)                        |          |
| 2572232434 | t3m_00790 | Scaffold       | t3m_contig_70_104_len_38616_read_count_3010148.13          |          |
| 2572232434 | t3m_00790 | Coordinates    | 27271..29838(-)                                            |          |
| 2572232434 | t3m_00790 | DNA_length     | 2568bp                                                     |          |
| 2572232434 | t3m_00790 | Protein_length | 855aa                                                      |          |
| 2572232434 | t3m_00790 | GC             |                                                            | 0.69     |

|            |           |                |                                                                         |           |
|------------|-----------|----------------|-------------------------------------------------------------------------|-----------|
| 2572232435 | t3m_00791 | COG_category   | [G] Carbohydrate transport and metabolism                               |           |
| 2572232435 | t3m_00791 | COG2814        | Arabinose efflux permease                                               | 7.00E-22  |
| 2572232435 | t3m_00791 | pfam07690      | MFS_1                                                                   | 2.40E-37  |
| 2572232435 | t3m_00791 | Locus_type     | CDS                                                                     |           |
| 2572232435 | t3m_00791 | Product_name   | Arabinose efflux permease                                               |           |
| 2572232435 | t3m_00791 | Scaffold       | t3m_contig_70_104_len_38616_read_count_3010148.13                       |           |
| 2572232435 | t3m_00791 | Coordinates    | 29941..31182(+)                                                         |           |
| 2572232435 | t3m_00791 | DNA_length     | 1242bp                                                                  |           |
| 2572232435 | t3m_00791 | Protein_length | 413aa                                                                   |           |
| 2572232435 | t3m_00791 | GC             |                                                                         | 0.72      |
| 2572232435 | t3m_00791 | Transmembrane  | Yes                                                                     |           |
| 2572232436 | t3m_00792 | Locus_type     | CDS                                                                     |           |
| 2572232436 | t3m_00792 | Product_name   | hypothetical protein                                                    |           |
| 2572232436 | t3m_00792 | Scaffold       | t3m_contig_70_104_len_38616_read_count_3010148.13                       |           |
| 2572232436 | t3m_00792 | Coordinates    | 31262..31885(+)                                                         |           |
| 2572232436 | t3m_00792 | DNA_length     | 624bp                                                                   |           |
| 2572232436 | t3m_00792 | Protein_length | 207aa                                                                   |           |
| 2572232436 | t3m_00792 | GC             |                                                                         | 0.71      |
| 2572232437 | t3m_00793 | KEGG_module    | M00126: Tetrahydrofolate biosynthesis, GTP => THF                       |           |
| 2572232437 | t3m_00793 | Metacyc        | PWY-2161: folate polyglutamylaton                                       |           |
| 2572232437 | t3m_00793 | Metacyc        | PWY-6614: tetrahydrofolate biosynthesis                                 |           |
| 2572232437 | t3m_00793 | Metacyc        | 1CMET2-PWY: formylTHF biosynthesis I                                    |           |
| 2572232437 | t3m_00793 | COG_category   | [H] Coenzyme transport and metabolism                                   |           |
| 2572232437 | t3m_00793 | COG0285        | Folylpolyglutamate synthase                                             | 2.00E-97  |
| 2572232437 | t3m_00793 | pfam08245      | Mur_ligase_M                                                            | 3.00E-14  |
| 2572232437 | t3m_00793 | pfam02875      | Mur_ligase_C                                                            | 2.30E-07  |
| 2572232437 | t3m_00793 | EC:6.3.2.12    | Dihydrofolate synthase.                                                 |           |
| 2572232437 | t3m_00793 | EC:6.3.2.17    | Tetrahydrofolate synthase.                                              |           |
| 2572232437 | t3m_00793 | TIGR01499      | folylpolyglutamate synthase/dihydrofolate synthase                      | 1.80E-108 |
| 2572232437 | t3m_00793 | KO:K11754      | dihydrofolate synthase / folylpolyglutamate synthase [EC:6.3.2.12 6.3.2 | 0.00E+00  |
| 2572232437 | t3m_00793 | Locus_type     | CDS                                                                     |           |

|            |           |                |                                                           |          |
|------------|-----------|----------------|-----------------------------------------------------------|----------|
| 2572232437 | t3m_00793 | Product_name   | folylpolyglutamate synthase/dihydrofolate synthase        |          |
| 2572232437 | t3m_00793 | Scaffold       | t3m_contig_70_104_len_38616_read_count_3010148.13         |          |
| 2572232437 | t3m_00793 | Coordinates    | 31837..33240(-)                                           |          |
| 2572232437 | t3m_00793 | DNA_length     | 1404bp                                                    |          |
| 2572232437 | t3m_00793 | Protein_length | 467aa                                                     |          |
| 2572232437 | t3m_00793 | GC             |                                                           | 0.72     |
| 2572232438 | t3m_00794 | KEGG_module    | M00376: 3-Hydroxypropionate bicycle                       |          |
| 2572232438 | t3m_00794 | KEGG_module    | M00375: Hydroxypropionate-hydroxybutylate cycle           |          |
| 2572232438 | t3m_00794 | Metacyc        | PWY-5789: 3-hydroxypropionate/4-hydroxybutyrate cycle     |          |
| 2572232438 | t3m_00794 | Metacyc        | PWY0-43: conversion of succinate to propionate            |          |
| 2572232438 | t3m_00794 | Metacyc        | P108-PWY: pyruvate fermentation to propionate I           |          |
| 2572232438 | t3m_00794 | Metacyc        | PWY-5743: 3-hydroxypropionate cycle                       |          |
| 2572232438 | t3m_00794 | Metacyc        | PWY-6728: methylaspartate cycle                           |          |
| 2572232438 | t3m_00794 | Metacyc        | PROIONMET-PWY: methylmalonyl pathway                      |          |
| 2572232438 | t3m_00794 | COG_category   | [I] Lipid transport and metabolism                        |          |
| 2572232438 | t3m_00794 | COG1884        | Methylmalonyl-CoA mutase, N-terminal domain/subunit       | 0.00E+00 |
| 2572232438 | t3m_00794 | pfam01642      | MM_CoA_mutase                                             | 0.00E+00 |
| 2572232438 | t3m_00794 | EC:5.4.99.2    | Methylmalonyl-CoA mutase.                                 |          |
| 2572232438 | t3m_00794 | TIGR00641      | methylmalonyl-CoA mutase N-terminal domain                | 0.00E+00 |
| 2572232438 | t3m_00794 | KO:K01848      | methylmalonyl-CoA mutase, N-terminal domain [EC:5.4.99.2] | 0.00E+00 |
| 2572232438 | t3m_00794 | Locus_type     | CDS                                                       |          |
| 2572232438 | t3m_00794 | Product_name   | methylmalonyl-CoA mutase (EC 5.4.99.2)                    |          |
| 2572232438 | t3m_00794 | Scaffold       | t3m_contig_70_104_len_38616_read_count_3010148.13         |          |
| 2572232438 | t3m_00794 | Coordinates    | 33257..34972(-)                                           |          |
| 2572232438 | t3m_00794 | DNA_length     | 1716bp                                                    |          |
| 2572232438 | t3m_00794 | Protein_length | 571aa                                                     |          |
| 2572232438 | t3m_00794 | GC             |                                                           | 0.68     |
| 2572232439 | t3m_00795 | COG_category   | [R] General function prediction only                      |          |
| 2572232439 | t3m_00795 | COG2102        | Predicted ATPases of PP-loop superfamily                  | 2.00E-49 |
| 2572232439 | t3m_00795 | pfam01902      | ATP_bind_4                                                | 6.90E-47 |
| 2572232439 | t3m_00795 | TIGR00289      | TIGR00289 family protein                                  | 4.70E-49 |
| 2572232439 | t3m_00795 | TIGR00290      | MJ0570-related uncharacterized domain                     | 2.90E-49 |

|            |           |                |                                                   |      |
|------------|-----------|----------------|---------------------------------------------------|------|
| 2572232439 | t3m_00795 | Locus_type     | CDS                                               |      |
| 2572232439 | t3m_00795 | Product_name   | Predicted ATPases of PP-loop superfamily          |      |
| 2572232439 | t3m_00795 | Scaffold       | t3m_contig_70_104_len_38616_read_count_3010148.13 |      |
| 2572232439 | t3m_00795 | Coordinates    | 35044..35748(-)                                   |      |
| 2572232439 | t3m_00795 | DNA_length     | 705bp                                             |      |
| 2572232439 | t3m_00795 | Protein_length | 234aa                                             |      |
| 2572232439 | t3m_00795 | GC             |                                                   | 0.68 |

|            |           |                |                                                                        |          |
|------------|-----------|----------------|------------------------------------------------------------------------|----------|
| 2572232440 | t3m_00796 | KEGG_module    | M00048: Inosine monophosphate biosynthesis, PRPP + glutamine => IMP    |          |
| 2572232440 | t3m_00796 | Metacyc        | PWY-6122: 5-aminoimidazole ribonucleotide biosynthesis II              |          |
| 2572232440 | t3m_00796 | Metacyc        | PWY-6121: 5-aminoimidazole ribonucleotide biosynthesis I               |          |
| 2572232440 | t3m_00796 | Metacyc        | PWY-6277: superpathway of 5-aminoimidazole ribonucleotide biosynthesis |          |
| 2572232440 | t3m_00796 | COG_category   | [F] Nucleotide transport and metabolism                                |          |
| 2572232440 | t3m_00796 | COG0046        | Phosphoribosylformylglycinamide (FGAM) synthase, synthetase domain     | 0.00E+00 |
| 2572232440 | t3m_00796 | pfam00586      | AIRS                                                                   | 8.80E-19 |
| 2572232440 | t3m_00796 | pfam02769      | AIRS_C                                                                 | 9.50E-25 |
| 2572232440 | t3m_00796 | pfam00586      | AIRS                                                                   | 1.70E-08 |
| 2572232440 | t3m_00796 | pfam02769      | AIRS_C                                                                 | 3.60E-17 |
| 2572232440 | t3m_00796 | EC:6.3.5.3     | Phosphoribosylformylglycinamide synthase.                              |          |
| 2572232440 | t3m_00796 | TIGR01736      | phosphoribosylformylglycinamide synthase II                            | 0.00E+00 |
| 2572232440 | t3m_00796 | KO:K01952      | phosphoribosylformylglycinamide synthase [EC:6.3.5.3]                  | 0.00E+00 |
| 2572232440 | t3m_00796 | Locus_type     | CDS                                                                    |          |
| 2572232440 | t3m_00796 | Product_name   | phosphoribosylformylglycinamide synthase II                            |          |
| 2572232440 | t3m_00796 | Scaffold       | t3m_contig_70_104_len_38616_read_count_3010148.13                      |          |
| 2572232440 | t3m_00796 | Coordinates    | 35758..38064(-)                                                        |          |
| 2572232440 | t3m_00796 | DNA_length     | 2307bp                                                                 |          |
| 2572232440 | t3m_00796 | Protein_length | 768aa                                                                  |          |
| 2572232440 | t3m_00796 | GC             |                                                                        | 0.71     |

|            |           |              |                                                                        |  |
|------------|-----------|--------------|------------------------------------------------------------------------|--|
| 2572232441 | t3m_00797 | KEGG_module  | M00048: Inosine monophosphate biosynthesis, PRPP + glutamine => IMP    |  |
| 2572232441 | t3m_00797 | Metacyc      | PWY-6277: superpathway of 5-aminoimidazole ribonucleotide biosynthesis |  |
| 2572232441 | t3m_00797 | Metacyc      | PWY-6121: 5-aminoimidazole ribonucleotide biosynthesis I               |  |
| 2572232441 | t3m_00797 | Metacyc      | PWY-6122: 5-aminoimidazole ribonucleotide biosynthesis II              |  |
| 2572232441 | t3m_00797 | COG_category | [F] Nucleotide transport and metabolism                                |  |

|            |           |                |                                                                     |          |
|------------|-----------|----------------|---------------------------------------------------------------------|----------|
| 2572232441 | t3m_00797 | COG1828        | Phosphoribosylformylglycinamide (FGAM) synthase, PurS component     | 5.00E-09 |
| 2572232441 | t3m_00797 | pfam02700      | PurS                                                                | 2.70E-11 |
| 2572232441 | t3m_00797 | EC:6.3.5.3     | Phosphoribosylformylglycinamide synthase.                           |          |
| 2572232441 | t3m_00797 | KO:K01952      | phosphoribosylformylglycinamide synthase [EC:6.3.5.3]               | 2.20E-06 |
| 2572232441 | t3m_00797 | Locus_type     | CDS                                                                 |          |
| 2572232441 | t3m_00797 | Product_name   | Phosphoribosylformylglycinamide (FGAM) synthase, PurS component     |          |
| 2572232441 | t3m_00797 | Scaffold       | t3m_contig_70_104_len_38616_read_count_3010148.13                   |          |
| 2572232441 | t3m_00797 | Coordinates    | 38069..38275(-)                                                     |          |
| 2572232441 | t3m_00797 | DNA_length     | 207bp                                                               |          |
| 2572232441 | t3m_00797 | Protein_length | 68aa                                                                |          |
| 2572232441 | t3m_00797 | GC             |                                                                     | 0.71     |
| 2572232442 | t3m_00798 | Locus_type     | CDS                                                                 |          |
| 2572232442 | t3m_00798 | Product_name   | hypothetical protein                                                |          |
| 2572232442 | t3m_00798 | Scaffold       | t3m_contig_70_106_len_37820_read_count_3081661.14                   |          |
| 2572232442 | t3m_00798 | Coordinates    | 3..1556(-)                                                          |          |
| 2572232442 | t3m_00798 | DNA_length     | 1554bp                                                              |          |
| 2572232442 | t3m_00798 | Protein_length | 518aa                                                               |          |
| 2572232442 | t3m_00798 | GC             |                                                                     | 0.63     |
| 2572232443 | t3m_00799 | COG_category   | [E] Amino acid transport and metabolism                             |          |
| 2572232443 | t3m_00799 | COG1231        | Monoamine oxidase                                                   | 1.00E-36 |
| 2572232443 | t3m_00799 | pfam01593      | Amino_oxidase                                                       | 7.50E-16 |
| 2572232443 | t3m_00799 | pfam01593      | Amino_oxidase                                                       | 2.00E-41 |
| 2572232443 | t3m_00799 | Locus_type     | CDS                                                                 |          |
| 2572232443 | t3m_00799 | Product_name   | Monoamine oxidase                                                   |          |
| 2572232443 | t3m_00799 | Scaffold       | t3m_contig_70_106_len_37820_read_count_3081661.14                   |          |
| 2572232443 | t3m_00799 | Coordinates    | 1970..3310(-)                                                       |          |
| 2572232443 | t3m_00799 | DNA_length     | 1341bp                                                              |          |
| 2572232443 | t3m_00799 | Protein_length | 446aa                                                               |          |
| 2572232443 | t3m_00799 | GC             |                                                                     | 0.69     |
| 2572232444 | t3m_00800 | COG_category   | [H] Coenzyme transport and metabolism                               |          |
| 2572232444 | t3m_00800 | COG0043        | 3-polyprenyl-4-hydroxybenzoate decarboxylase and related decarboxyl | 6.00E-91 |

|            |           |                |                                                   |           |
|------------|-----------|----------------|---------------------------------------------------|-----------|
| 2572232444 | t3m_00800 | pfam01977      | UbiD                                              | 5.70E-92  |
| 2572232444 | t3m_00800 | EC:4.1.1.61    | 4-hydroxybenzoate decarboxylase.                  |           |
| 2572232444 | t3m_00800 | TIGR00148      | UbiD family decarboxylase                         | 2.80E-99  |
| 2572232444 | t3m_00800 | KO:K01612      | 4-hydroxybenzoate decarboxylase [EC:4.1.1.61]     | 0.00E+00  |
| 2572232444 | t3m_00800 | Locus_type     | CDS                                               |           |
| 2572232444 | t3m_00800 | Product_name   | UbiD family decarboxylase                         |           |
| 2572232444 | t3m_00800 | Scaffold       | t3m_contig_70_106_len_37820_read_count_3081661.14 |           |
| 2572232444 | t3m_00800 | Coordinates    | 3624..4913(+)                                     |           |
| 2572232444 | t3m_00800 | DNA_length     | 1290bp                                            |           |
| 2572232444 | t3m_00800 | Protein_length | 429aa                                             |           |
| 2572232444 | t3m_00800 | GC             |                                                   | 0.62      |
| 2572232445 | t3m_00801 | COG_category   | [S] Function unknown                              |           |
| 2572232445 | t3m_00801 | COG1679        | Uncharacterized conserved protein                 | 7.00E-104 |
| 2572232445 | t3m_00801 | pfam04412      | DUF521                                            | 3.30E-117 |
| 2572232445 | t3m_00801 | pfam01989      | DUF126                                            | 3.40E-17  |
| 2572232445 | t3m_00801 | KO:K09123      | hypothetical protein                              | 0.00E+00  |
| 2572232445 | t3m_00801 | ITERM:01400    | predicted aconitase subunit 1 (EC 4.2.1.3)        |           |
| 2572232445 | t3m_00801 | Locus_type     | CDS                                               |           |
| 2572232445 | t3m_00801 | Product_name   | predicted aconitase subunit 1 (EC 4.2.1.3)        |           |
| 2572232445 | t3m_00801 | Scaffold       | t3m_contig_70_106_len_37820_read_count_3081661.14 |           |
| 2572232445 | t3m_00801 | Coordinates    | 4925..6403(+)                                     |           |
| 2572232445 | t3m_00801 | DNA_length     | 1479bp                                            |           |
| 2572232445 | t3m_00801 | Protein_length | 492aa                                             |           |
| 2572232445 | t3m_00801 | GC             |                                                   | 0.63      |
| 2572232445 | t3m_00801 | Fused_gene     | Yes                                               |           |
| 2572232446 | t3m_00802 | COG_category   | [R] General function prediction only              |           |
| 2572232446 | t3m_00802 | COG0535        | Predicted Fe-S oxidoreductases                    | 3.00E-34  |
| 2572232446 | t3m_00802 | pfam04055      | Radical_SAM                                       | 1.50E-15  |
| 2572232446 | t3m_00802 | pfam11946      | DUF3463                                           | 9.50E-20  |
| 2572232446 | t3m_00802 | pfam13353      | Fer4_12                                           | 5.60E-05  |
| 2572232446 | t3m_00802 | TIGR03961      | archaeal radical SAM protein, PTO1314 family      | 0.00E+00  |
| 2572232446 | t3m_00802 | Locus_type     | CDS                                               |           |



|            |           |                |                                               |                                                   |           |
|------------|-----------|----------------|-----------------------------------------------|---------------------------------------------------|-----------|
| 2572232446 | t3m_00802 | Product_name   |                                               | archaeal radical SAM protein, PTO1314 family      |           |
| 2572232446 | t3m_00802 | Scaffold       |                                               | t3m_contig_70_106_len_37820_read_count_3081661.14 |           |
| 2572232446 | t3m_00802 | Coordinates    |                                               | 6456..7490(-)                                     |           |
| 2572232446 | t3m_00802 | DNA_length     |                                               | 1035bp                                            |           |
| 2572232446 | t3m_00802 | Protein_length |                                               | 344aa                                             |           |
| 2572232446 | t3m_00802 | GC             |                                               |                                                   | 0.63      |
| 2572232447 | t3m_00803 | pfam00924      | MS_channel                                    |                                                   | 3.00E-19  |
| 2572232447 | t3m_00803 | Locus_type     |                                               | CDS                                               |           |
| 2572232447 | t3m_00803 | Product_name   |                                               | Mechanosensitive ion channel                      |           |
| 2572232447 | t3m_00803 | Scaffold       |                                               | t3m_contig_70_106_len_37820_read_count_3081661.14 |           |
| 2572232447 | t3m_00803 | Coordinates    |                                               | 7588..8091(-)                                     |           |
| 2572232447 | t3m_00803 | DNA_length     |                                               | 504bp                                             |           |
| 2572232447 | t3m_00803 | Protein_length |                                               | 167aa                                             |           |
| 2572232447 | t3m_00803 | GC             |                                               |                                                   | 0.65      |
| 2572232447 | t3m_00803 | Transmembrane  |                                               | Yes                                               |           |
| 2572232448 | t3m_00804 | COG_category   | [S] Function unknown                          |                                                   |           |
| 2572232448 | t3m_00804 | COG4320        | Uncharacterized protein conserved in bacteria |                                                   | 5.00E-30  |
| 2572232448 | t3m_00804 | pfam10009      | DUF2252                                       |                                                   | 8.80E-126 |
| 2572232448 | t3m_00804 | Locus_type     |                                               | CDS                                               |           |
| 2572232448 | t3m_00804 | Product_name   |                                               | Uncharacterized protein conserved in bacteria     |           |
| 2572232448 | t3m_00804 | Scaffold       |                                               | t3m_contig_70_106_len_37820_read_count_3081661.14 |           |
| 2572232448 | t3m_00804 | Coordinates    |                                               | 8582..9751(+)                                     |           |
| 2572232448 | t3m_00804 | DNA_length     |                                               | 1170bp                                            |           |
| 2572232448 | t3m_00804 | Protein_length |                                               | 389aa                                             |           |
| 2572232448 | t3m_00804 | GC             |                                               |                                                   | 0.65      |
| 2572232449 | t3m_00805 | Locus_type     |                                               | CDS                                               |           |
| 2572232449 | t3m_00805 | Product_name   |                                               | hypothetical protein                              |           |
| 2572232449 | t3m_00805 | Scaffold       |                                               | t3m_contig_70_106_len_37820_read_count_3081661.14 |           |
| 2572232449 | t3m_00805 | Coordinates    |                                               | 9786..10367(-)                                    |           |
| 2572232449 | t3m_00805 | DNA_length     |                                               | 582bp                                             |           |
| 2572232449 | t3m_00805 | Protein_length |                                               | 193aa                                             |           |

|            |           |                |                                                                               |          |
|------------|-----------|----------------|-------------------------------------------------------------------------------|----------|
| 2572232449 | t3m_00805 | GC             |                                                                               | 0.65     |
| 2572232449 | t3m_00805 | Transmembrane  | Yes                                                                           |          |
| 2572232450 | t3m_00806 | pfam13527      | Acetyltransf_9                                                                | 2.80E-09 |
| 2572232450 | t3m_00806 | Locus_type     | CDS                                                                           |          |
| 2572232450 | t3m_00806 | Product_name   | Acetyltransferase (GNAT) domain                                               |          |
| 2572232450 | t3m_00806 | Scaffold       | t3m_contig_70_106_len_37820_read_count_3081661.14                             |          |
| 2572232450 | t3m_00806 | Coordinates    | 10434..11393(-)                                                               |          |
| 2572232450 | t3m_00806 | DNA_length     | 960bp                                                                         |          |
| 2572232450 | t3m_00806 | Protein_length | 319aa                                                                         |          |
| 2572232450 | t3m_00806 | GC             |                                                                               | 0.68     |
| 2572232451 | t3m_00807 | KEGG_module    | M00009: Citrate cycle (TCA cycle, Krebs cycle)                                |          |
| 2572232451 | t3m_00807 | KEGG_module    | M00012: Glyoxylate cycle                                                      |          |
| 2572232451 | t3m_00807 | KEGG_module    | M00010: Citrate cycle, first carbon oxidation, oxaloacetate => 2-oxoglutarate |          |
| 2572232451 | t3m_00807 | Metacyc        | PWY-6969: TCA cycle V (2-oxoglutarate:ferredoxin oxidoreductase)              |          |
| 2572232451 | t3m_00807 | Metacyc        | PWY-5913: TCA cycle VI (obligate autotrophs)                                  |          |
| 2572232451 | t3m_00807 | Metacyc        | ANARESP1-PWY: respiration (anaerobic)                                         |          |
| 2572232451 | t3m_00807 | Metacyc        | FERMENTATION-PWY: mixed acid fermentation                                     |          |
| 2572232451 | t3m_00807 | Metacyc        | PWY-5750: itaconate biosynthesis                                              |          |
| 2572232451 | t3m_00807 | Metacyc        | P105-PWY: TCA cycle IV (2-oxoglutarate decarboxylase)                         |          |
| 2572232451 | t3m_00807 | Metacyc        | PWY-6728: methylaspartate cycle                                               |          |
| 2572232451 | t3m_00807 | Metacyc        | GLYOXYLATE-BYPASS: glyoxylate cycle                                           |          |
| 2572232451 | t3m_00807 | Metacyc        | PWY-7124: ethylene biosynthesis V                                             |          |
| 2572232451 | t3m_00807 | Metacyc        | PWY-6549: glutamine biosynthesis III                                          |          |
| 2572232451 | t3m_00807 | Metacyc        | TCA: TCA cycle I (prokaryotic)                                                |          |
| 2572232451 | t3m_00807 | Metacyc        | PWY-5690: TCA cycle II (eukaryotic)                                           |          |
| 2572232451 | t3m_00807 | Metacyc        | REDCITCYC: TCA cycle III (helicobacter)                                       |          |
| 2572232451 | t3m_00807 | IMG_pathway    | 322: 2-oxoglutarate synthesis by partial TCA cycle                            |          |
| 2572232451 | t3m_00807 | IMG_pathway    | 334: Tricarboxylic acid cycle                                                 |          |
| 2572232451 | t3m_00807 | IMG_pathway    | 911: Acetyl-CoA assimilation via glyoxylate cycle                             |          |
| 2572232451 | t3m_00807 | IMG_pathway    | 913: Acetyl-CoA assimilation via methylaspartate cycle                        |          |
| 2572232451 | t3m_00807 | IMG_pathway    | 960: Glyoxalate from acetyl-CoA via isocitrate lyase cycle                    |          |
| 2572232451 | t3m_00807 | COG_category   | [C] Energy production and conversion                                          |          |

|            |           |                |                                                                               |           |
|------------|-----------|----------------|-------------------------------------------------------------------------------|-----------|
| 2572232451 | t3m_00807 | COG0372        | Citrate synthase                                                              | 5.00E-119 |
| 2572232451 | t3m_00807 | pfam00285      | Citrate_synt                                                                  | 5.80E-129 |
| 2572232451 | t3m_00807 | EC:2.3.3.1     | Citrate (Si)-synthase.                                                        |           |
| 2572232451 | t3m_00807 | TIGR01798      | citrate synthase I (hexameric type)                                           | 0.00E+00  |
| 2572232451 | t3m_00807 | KO:K01647      | citrate synthase [EC:2.3.3.1]                                                 | 0.00E+00  |
| 2572232451 | t3m_00807 | ITERM:01395    | citrate synthase (EC 2.3.3.1)                                                 |           |
| 2572232451 | t3m_00807 | Locus_type     | CDS                                                                           |           |
| 2572232451 | t3m_00807 | Product_name   | citrate synthase (EC 2.3.3.1)                                                 |           |
| 2572232451 | t3m_00807 | Scaffold       | t3m_contig_70_106_len_37820_read_count_3081661.14                             |           |
| 2572232451 | t3m_00807 | Coordinates    | 11463..12875(-)                                                               |           |
| 2572232451 | t3m_00807 | DNA_length     | 1413bp                                                                        |           |
| 2572232451 | t3m_00807 | Protein_length | 470aa                                                                         |           |
| 2572232451 | t3m_00807 | GC             |                                                                               | 0.64      |
|            |           |                |                                                                               |           |
| 2572232452 | t3m_00808 | pfam13489      | Methyltransf_23                                                               | 6.70E-18  |
| 2572232452 | t3m_00808 | Locus_type     | CDS                                                                           |           |
| 2572232452 | t3m_00808 | Product_name   | Methyltransferase domain                                                      |           |
| 2572232452 | t3m_00808 | Scaffold       | t3m_contig_70_106_len_37820_read_count_3081661.14                             |           |
| 2572232452 | t3m_00808 | Coordinates    | 13026..13742(+)                                                               |           |
| 2572232452 | t3m_00808 | DNA_length     | 717bp                                                                         |           |
| 2572232452 | t3m_00808 | Protein_length | 238aa                                                                         |           |
| 2572232452 | t3m_00808 | GC             |                                                                               | 0.68      |
|            |           |                |                                                                               |           |
| 2572232453 | t3m_00809 | KEGG_module    | M00515: FlrB-FlrC (polar flagellar synthesis) two-component regulatory system |           |
| 2572232453 | t3m_00809 | pfam00072      | Response_reg                                                                  | 5.60E-29  |
| 2572232453 | t3m_00809 | pfam12840      | HTH_20                                                                        | 1.70E-12  |
| 2572232453 | t3m_00809 | KO:K10943      | two component system, response regulator FlrC                                 | 2.20E-24  |
| 2572232453 | t3m_00809 | Locus_type     | CDS                                                                           |           |
| 2572232453 | t3m_00809 | Product_name   | Response regulator receiver domain/Helix-turn-helix domain                    |           |
| 2572232453 | t3m_00809 | Scaffold       | t3m_contig_70_106_len_37820_read_count_3081661.14                             |           |
| 2572232453 | t3m_00809 | Coordinates    | 13714..14763(-)                                                               |           |
| 2572232453 | t3m_00809 | DNA_length     | 1050bp                                                                        |           |
| 2572232453 | t3m_00809 | Protein_length | 349aa                                                                         |           |
| 2572232453 | t3m_00809 | GC             |                                                                               | 0.68      |

|            |           |                |                                                   |           |
|------------|-----------|----------------|---------------------------------------------------|-----------|
| 2572232454 | t3m_00810 | pfam08448      | PAS_4                                             | 9.70E-09  |
| 2572232454 | t3m_00810 | pfam13426      | PAS_9                                             | 6.20E-19  |
| 2572232454 | t3m_00810 | pfam02518      | HATPase_c                                         | 4.80E-29  |
| 2572232454 | t3m_00810 | pfam00512      | HisKA                                             | 9.60E-12  |
| 2572232454 | t3m_00810 | TIGR00229      | PAS domain S-box                                  | 9.90E-10  |
| 2572232454 | t3m_00810 | Locus_type     | CDS                                               |           |
| 2572232454 | t3m_00810 | Product_name   | PAS domain S-box                                  |           |
| 2572232454 | t3m_00810 | Scaffold       | t3m_contig_70_106_len_37820_read_count_3081661.14 |           |
| 2572232454 | t3m_00810 | Coordinates    | 14843..16300(-)                                   |           |
| 2572232454 | t3m_00810 | DNA_length     | 1458bp                                            |           |
| 2572232454 | t3m_00810 | Protein_length | 485aa                                             |           |
| 2572232454 | t3m_00810 | GC             |                                                   | 0.67      |
|            |           |                |                                                   |           |
| 2572232455 | t3m_00811 | Locus_type     | CDS                                               |           |
| 2572232455 | t3m_00811 | Product_name   | hypothetical protein                              |           |
| 2572232455 | t3m_00811 | Scaffold       | t3m_contig_70_106_len_37820_read_count_3081661.14 |           |
| 2572232455 | t3m_00811 | Coordinates    | 16413..16811(+)                                   |           |
| 2572232455 | t3m_00811 | DNA_length     | 399bp                                             |           |
| 2572232455 | t3m_00811 | Protein_length | 132aa                                             |           |
| 2572232455 | t3m_00811 | GC             |                                                   | 0.71      |
|            |           |                |                                                   |           |
| 2572232456 | t3m_00812 | COG_category   | [R] General function prediction only              |           |
| 2572232456 | t3m_00812 | COG2403        | Predicted GTPase                                  | 1.00E-120 |
| 2572232456 | t3m_00812 | Locus_type     | CDS                                               |           |
| 2572232456 | t3m_00812 | Product_name   | Predicted GTPase                                  |           |
| 2572232456 | t3m_00812 | Scaffold       | t3m_contig_70_106_len_37820_read_count_3081661.14 |           |
| 2572232456 | t3m_00812 | Coordinates    | 16827..18149(-)                                   |           |
| 2572232456 | t3m_00812 | DNA_length     | 1323bp                                            |           |
| 2572232456 | t3m_00812 | Protein_length | 440aa                                             |           |
| 2572232456 | t3m_00812 | GC             |                                                   | 0.67      |
|            |           |                |                                                   |           |
| 2572232457 | t3m_00813 | pfam07690      | MFS_1                                             | 1.30E-43  |
| 2572232457 | t3m_00813 | TIGR00711      | drug resistance transporter, EmrB/QacA subfamily  | 6.20E-71  |

|            |           |                |                                                               |          |
|------------|-----------|----------------|---------------------------------------------------------------|----------|
| 2572232457 | t3m_00813 | Locus_type     | CDS                                                           |          |
| 2572232457 | t3m_00813 | Product_name   | Major Facilitator Superfamily                                 |          |
| 2572232457 | t3m_00813 | Scaffold       | t3m_contig_70_106_len_37820_read_count_3081661.14             |          |
| 2572232457 | t3m_00813 | Coordinates    | 18206..19657(-)                                               |          |
| 2572232457 | t3m_00813 | DNA_length     | 1452bp                                                        |          |
| 2572232457 | t3m_00813 | Protein_length | 483aa                                                         |          |
| 2572232457 | t3m_00813 | GC             |                                                               | 0.67     |
| 2572232457 | t3m_00813 | Transmembrane  | Yes                                                           |          |
| 2572232458 | t3m_00814 | KEGG_module    | M00050: Guanine ribonucleotide biosynthesis IMP => GDP,GTP    |          |
| 2572232458 | t3m_00814 | Metacyc        | PWY-6596: adenosine nucleotides degradation I                 |          |
| 2572232458 | t3m_00814 | Metacyc        | PWY-5695: urate biosynthesis/inosine 5'-phosphate degradation |          |
| 2572232458 | t3m_00814 | Metacyc        | PWY-6125: guanosine nucleotides <i>de novo</i> biosynthesis   |          |
| 2572232458 | t3m_00814 | Metacyc        | PWY-841: purine nucleotides <i>de novo</i> biosynthesis II    |          |
| 2572232458 | t3m_00814 | pfam00571      | CBS                                                           | 2.80E-09 |
| 2572232458 | t3m_00814 | EC:1.1.1.205   | IMP dehydrogenase.                                            |          |
| 2572232458 | t3m_00814 | KO:K00088      | IMP dehydrogenase [EC:1.1.1.205]                              | 1.40E-18 |
| 2572232458 | t3m_00814 | Locus_type     | CDS                                                           |          |
| 2572232458 | t3m_00814 | Product_name   | CBS domain                                                    |          |
| 2572232458 | t3m_00814 | Scaffold       | t3m_contig_70_106_len_37820_read_count_3081661.14             |          |
| 2572232458 | t3m_00814 | Coordinates    | 19780..20223(-)                                               |          |
| 2572232458 | t3m_00814 | DNA_length     | 444bp                                                         |          |
| 2572232458 | t3m_00814 | Protein_length | 147aa                                                         |          |
| 2572232458 | t3m_00814 | GC             |                                                               | 0.64     |
| 2572232459 | t3m_00815 | COG_category   | [R] General function prediction only                          |          |
| 2572232459 | t3m_00815 | COG0727        | Predicted Fe-S-cluster oxidoreductase                         | 1.00E-07 |
| 2572232459 | t3m_00815 | pfam03692      | CxxCxxCC                                                      | 2.30E-07 |
| 2572232459 | t3m_00815 | Locus_type     | CDS                                                           |          |
| 2572232459 | t3m_00815 | Product_name   | Predicted Fe-S-cluster oxidoreductase                         |          |
| 2572232459 | t3m_00815 | Scaffold       | t3m_contig_70_106_len_37820_read_count_3081661.14             |          |
| 2572232459 | t3m_00815 | Coordinates    | 20275..21384(+)                                               |          |
| 2572232459 | t3m_00815 | DNA_length     | 1110bp                                                        |          |
| 2572232459 | t3m_00815 | Protein_length | 369aa                                                         |          |

|            |           |                |                                                                              |          |
|------------|-----------|----------------|------------------------------------------------------------------------------|----------|
| 2572232459 | t3m_00815 | GC             |                                                                              | 0.7      |
| 2572232460 | t3m_00816 | COG_category   | [B] Chromatin structure and dynamics                                         |          |
| 2572232460 | t3m_00816 | COG_category   | [Q] Secondary metabolites biosynthesis, transport and catabolism             |          |
| 2572232460 | t3m_00816 | COG0123        | Deacetylases, including yeast histone deacetylase and acetoin utilization    | 2.00E-65 |
| 2572232460 | t3m_00816 | pfam00850      | Hist_deacetyl                                                                | 8.30E-65 |
| 2572232460 | t3m_00816 | KO:K04768      | acetoin utilization protein AcuC                                             | 0.00E+00 |
| 2572232460 | t3m_00816 | Locus_type     | CDS                                                                          |          |
| 2572232460 | t3m_00816 | Product_name   | Deacetylases, including yeast histone deacetylase and acetoin utilization    |          |
| 2572232460 | t3m_00816 | Scaffold       | t3m_contig_70_106_len_37820_read_count_3081661.14                            |          |
| 2572232460 | t3m_00816 | Coordinates    | 21381..22529(-)                                                              |          |
| 2572232460 | t3m_00816 | DNA_length     | 1149bp                                                                       |          |
| 2572232460 | t3m_00816 | Protein_length | 382aa                                                                        |          |
| 2572232460 | t3m_00816 | GC             |                                                                              | 0.69     |
| 2572232461 | t3m_00817 | Locus_type     | CDS                                                                          |          |
| 2572232461 | t3m_00817 | Product_name   | hypothetical protein                                                         |          |
| 2572232461 | t3m_00817 | Scaffold       | t3m_contig_70_106_len_37820_read_count_3081661.14                            |          |
| 2572232461 | t3m_00817 | Coordinates    | 22746..22970(+)                                                              |          |
| 2572232461 | t3m_00817 | DNA_length     | 225bp                                                                        |          |
| 2572232461 | t3m_00817 | Protein_length | 74aa                                                                         |          |
| 2572232461 | t3m_00817 | GC             |                                                                              | 0.59     |
| 2572232462 | t3m_00818 | COG_category   | [K] Transcription                                                            |          |
| 2572232462 | t3m_00818 | COG1405        | Transcription initiation factor TFIIB, Brf1 subunit/Transcription initiation | 6.00E-44 |
| 2572232462 | t3m_00818 | pfam00382      | TFIIB                                                                        | 7.70E-11 |
| 2572232462 | t3m_00818 | pfam00382      | TFIIB                                                                        | 4.30E-12 |
| 2572232462 | t3m_00818 | KO:K03124      | transcription initiation factor TFIIB                                        | 5.90E-35 |
| 2572232462 | t3m_00818 | Locus_type     | CDS                                                                          |          |
| 2572232462 | t3m_00818 | Product_name   | Transcription initiation factor TFIIB, Brf1 subunit/Transcription initiation |          |
| 2572232462 | t3m_00818 | Scaffold       | t3m_contig_70_106_len_37820_read_count_3081661.14                            |          |
| 2572232462 | t3m_00818 | Coordinates    | 22975..23874(-)                                                              |          |
| 2572232462 | t3m_00818 | DNA_length     | 900bp                                                                        |          |
| 2572232462 | t3m_00818 | Protein_length | 299aa                                                                        |          |

|            |           |                |                                                                   |          |
|------------|-----------|----------------|-------------------------------------------------------------------|----------|
| 2572232462 | t3m_00818 | GC             |                                                                   | 0.71     |
| 2572232463 | t3m_00819 | Locus_type     | CDS                                                               |          |
| 2572232463 | t3m_00819 | Product_name   | hypothetical protein                                              |          |
| 2572232463 | t3m_00819 | Scaffold       | t3m_contig_70_106_len_37820_read_count_3081661.14                 |          |
| 2572232463 | t3m_00819 | Coordinates    | 24035..24655(+)                                                   |          |
| 2572232463 | t3m_00819 | DNA_length     | 621bp                                                             |          |
| 2572232463 | t3m_00819 | Protein_length | 206aa                                                             |          |
| 2572232463 | t3m_00819 | GC             |                                                                   | 0.67     |
| 2572232463 | t3m_00819 | Transmembrane  | Yes                                                               |          |
| 2572232464 | t3m_00820 | COG_category   | [J] Translation, ribosomal structure and biogenesis               |          |
| 2572232464 | t3m_00820 | COG0532        | Translation initiation factor 2 (IF-2; GTPase)                    | 6.00E-94 |
| 2572232464 | t3m_00820 | pfam03144      | GTP_EFTU_D2                                                       | 1.90E-06 |
| 2572232464 | t3m_00820 | pfam00009      | GTP_EFTU                                                          | 9.30E-29 |
| 2572232464 | t3m_00820 | pfam14578      | GTP_EFTU_D4                                                       | 1.50E-16 |
| 2572232464 | t3m_00820 | pfam11987      | IF-2                                                              | 2.00E-08 |
| 2572232464 | t3m_00820 | TIGR00491      | translation initiation factor aIF-2/yIF-2                         | 0.00E+00 |
| 2572232464 | t3m_00820 | TIGR00231      | small GTP-binding protein domain                                  | 2.80E-19 |
| 2572232464 | t3m_00820 | KO:K03243      | translation initiation factor 5B                                  | 0.00E+00 |
| 2572232464 | t3m_00820 | Locus_type     | CDS                                                               |          |
| 2572232464 | t3m_00820 | Product_name   | translation initiation factor aIF-2/yIF-2                         |          |
| 2572232464 | t3m_00820 | Scaffold       | t3m_contig_70_106_len_37820_read_count_3081661.14                 |          |
| 2572232464 | t3m_00820 | Coordinates    | 24678..26441(-)                                                   |          |
| 2572232464 | t3m_00820 | DNA_length     | 1764bp                                                            |          |
| 2572232464 | t3m_00820 | Protein_length | 587aa                                                             |          |
| 2572232464 | t3m_00820 | GC             |                                                                   | 0.69     |
| 2572232465 | t3m_00821 | KEGG_module    | M00362: Nucleotide sugar biosynthesis, prokaryotes                |          |
| 2572232465 | t3m_00821 | KEGG_module    | M00361: Nucleotide sugar biosynthesis, eukaryotes                 |          |
| 2572232465 | t3m_00821 | KEGG_module    | M00549: Nucleotide sugar biosynthesis, glucose => UDP-glucose     |          |
| 2572232465 | t3m_00821 | KEGG_module    | M00554: Nucleotide sugar biosynthesis, galactose => UDP-galactose |          |
| 2572232465 | t3m_00821 | Metacyc        | PWY-6527: stachyose degradation                                   |          |
| 2572232465 | t3m_00821 | Metacyc        | PWY-6317: galactose degradation I (Leloir pathway)                |          |

|            |           |                |                                                                  |          |
|------------|-----------|----------------|------------------------------------------------------------------|----------|
| 2572232465 | t3m_00821 | Metacyc        | COLANSYN-PWY: colanic acid building blocks biosynthesis          |          |
| 2572232465 | t3m_00821 | COG_category   | [C] Energy production and conversion                             |          |
| 2572232465 | t3m_00821 | COG1085        | Galactose-1-phosphate uridylyltransferase                        | 2.00E-56 |
| 2572232465 | t3m_00821 | pfam01087      | GalP_UDP_transf                                                  | 1.30E-15 |
| 2572232465 | t3m_00821 | EC:2.7.7.12    | UDP-glucose--hexose-1-phosphate uridylyltransferase.             |          |
| 2572232465 | t3m_00821 | KO:K00965      | UDPglucose--hexose-1-phosphate uridylyltransferase [EC:2.7.7.12] | 0.00E+00 |
| 2572232465 | t3m_00821 | Locus_type     | CDS                                                              |          |
| 2572232465 | t3m_00821 | Product_name   | Galactose-1-phosphate uridylyltransferase                        |          |
| 2572232465 | t3m_00821 | Scaffold       | t3m_contig_70_106_len_37820_read_count_3081661.14                |          |
| 2572232465 | t3m_00821 | Coordinates    | 26467..27486(-)                                                  |          |
| 2572232465 | t3m_00821 | DNA_length     | 1020bp                                                           |          |
| 2572232465 | t3m_00821 | Protein_length | 339aa                                                            |          |
| 2572232465 | t3m_00821 | GC             |                                                                  | 0.71     |
| 2572232466 | t3m_00822 | COG_category   | [R] General function prediction only                             |          |
| 2572232466 | t3m_00822 | COG1524        | Uncharacterized proteins of the AP superfamily                   | 7.00E-19 |
| 2572232466 | t3m_00822 | pfam01663      | Phosphodiast                                                     | 3.40E-22 |
| 2572232466 | t3m_00822 | Locus_type     | CDS                                                              |          |
| 2572232466 | t3m_00822 | Product_name   | Uncharacterized proteins of the AP superfamily                   |          |
| 2572232466 | t3m_00822 | Scaffold       | t3m_contig_70_106_len_37820_read_count_3081661.14                |          |
| 2572232466 | t3m_00822 | Coordinates    | 27483..28844(-)                                                  |          |
| 2572232466 | t3m_00822 | DNA_length     | 1362bp                                                           |          |
| 2572232466 | t3m_00822 | Protein_length | 453aa                                                            |          |
| 2572232466 | t3m_00822 | GC             |                                                                  | 0.71     |
| 2572232467 | t3m_00823 | COG_category   | [L] Replication, recombination and repair                        |          |
| 2572232467 | t3m_00823 | COG0389        | Nucleotidyltransferase/DNA polymerase involved in DNA repair     | 2.00E-60 |
| 2572232467 | t3m_00823 | pfam11798      | IMS_HHH                                                          | 3.80E-08 |
| 2572232467 | t3m_00823 | pfam11799      | IMS_C                                                            | 1.50E-13 |
| 2572232467 | t3m_00823 | pfam00817      | IMS                                                              | 3.10E-38 |
| 2572232467 | t3m_00823 | EC:2.7.7.7     | DNA-directed DNA polymerase.                                     |          |
| 2572232467 | t3m_00823 | KO:K02346      | DNA polymerase IV [EC:2.7.7.7]                                   | 0.00E+00 |
| 2572232467 | t3m_00823 | Locus_type     | CDS                                                              |          |
| 2572232467 | t3m_00823 | Product_name   | Nucleotidyltransferase/DNA polymerase involved in DNA repair     |          |



|            |           |                |                                                            |          |
|------------|-----------|----------------|------------------------------------------------------------|----------|
| 2572232467 | t3m_00823 | Scaffold       | t3m_contig_70_106_len_37820_read_count_3081661.14          |          |
| 2572232467 | t3m_00823 | Coordinates    | 28907..30067(-)                                            |          |
| 2572232467 | t3m_00823 | DNA_length     | 1161bp                                                     |          |
| 2572232467 | t3m_00823 | Protein_length | 386aa                                                      |          |
| 2572232467 | t3m_00823 | GC             |                                                            | 0.72     |
|            |           |                |                                                            |          |
| 2572232468 | t3m_00824 | COG_category   | [T] Signal transduction mechanisms                         |          |
| 2572232468 | t3m_00824 | COG0467        | RecA-superfamily ATPases implicated in signal transduction | 6.00E-38 |
| 2572232468 | t3m_00824 | pfam06745      | KaiC                                                       | 4.10E-51 |
| 2572232468 | t3m_00824 | Locus_type     | CDS                                                        |          |
| 2572232468 | t3m_00824 | Product_name   | RecA-superfamily ATPases implicated in signal transduction |          |
| 2572232468 | t3m_00824 | Scaffold       | t3m_contig_70_106_len_37820_read_count_3081661.14          |          |
| 2572232468 | t3m_00824 | Coordinates    | 30143..30868(-)                                            |          |
| 2572232468 | t3m_00824 | DNA_length     | 726bp                                                      |          |
| 2572232468 | t3m_00824 | Protein_length | 241aa                                                      |          |
| 2572232468 | t3m_00824 | GC             |                                                            | 0.68     |
|            |           |                |                                                            |          |
| 2572232469 | t3m_00825 | COG_category   | [T] Signal transduction mechanisms                         |          |
| 2572232469 | t3m_00825 | COG0467        | RecA-superfamily ATPases implicated in signal transduction | 5.00E-11 |
| 2572232469 | t3m_00825 | pfam06745      | KaiC                                                       | 1.10E-05 |
| 2572232469 | t3m_00825 | Locus_type     | CDS                                                        |          |
| 2572232469 | t3m_00825 | Product_name   | RecA-superfamily ATPases implicated in signal transduction |          |
| 2572232469 | t3m_00825 | Scaffold       | t3m_contig_70_106_len_37820_read_count_3081661.14          |          |
| 2572232469 | t3m_00825 | Coordinates    | 30855..31706(-)                                            |          |
| 2572232469 | t3m_00825 | DNA_length     | 852bp                                                      |          |
| 2572232469 | t3m_00825 | Protein_length | 283aa                                                      |          |
| 2572232469 | t3m_00825 | GC             |                                                            | 0.68     |
|            |           |                |                                                            |          |
| 2572232470 | t3m_00826 | COG_category   | [S] Function unknown                                       |          |
| 2572232470 | t3m_00826 | COG0585        | Uncharacterized conserved protein                          | 2.00E-70 |
| 2572232470 | t3m_00826 | pfam01142      | TruD                                                       | 9.50E-80 |
| 2572232470 | t3m_00826 | EC:5.4.99.27   | tRNA pseudouridine(13) synthase.                           |          |
| 2572232470 | t3m_00826 | TIGR00094      | tRNA pseudouridine synthase, TruD family                   | 2.00E-60 |
| 2572232470 | t3m_00826 | KO:K06176      | tRNA pseudouridine13 synthase [EC:5.4.99.27]               | 0.00E+00 |

|            |           |                |                                                   |          |
|------------|-----------|----------------|---------------------------------------------------|----------|
| 2572232470 | t3m_00826 | Locus_type     | CDS                                               |          |
| 2572232470 | t3m_00826 | Product_name   | tRNA pseudouridine synthase, TruD family          |          |
| 2572232470 | t3m_00826 | Scaffold       | t3m_contig_70_106_len_37820_read_count_3081661.14 |          |
| 2572232470 | t3m_00826 | Coordinates    | 31851..33104(-)                                   |          |
| 2572232470 | t3m_00826 | DNA_length     | 1254bp                                            |          |
| 2572232470 | t3m_00826 | Protein_length | 417aa                                             |          |
| 2572232470 | t3m_00826 | GC             |                                                   | 0.71     |
|            |           |                |                                                   |          |
| 2572232471 | t3m_00827 | Locus_type     | CDS                                               |          |
| 2572232471 | t3m_00827 | Product_name   | hypothetical protein                              |          |
| 2572232471 | t3m_00827 | Scaffold       | t3m_contig_70_106_len_37820_read_count_3081661.14 |          |
| 2572232471 | t3m_00827 | Coordinates    | 33185..33688(+)                                   |          |
| 2572232471 | t3m_00827 | DNA_length     | 504bp                                             |          |
| 2572232471 | t3m_00827 | Protein_length | 167aa                                             |          |
| 2572232471 | t3m_00827 | GC             |                                                   | 0.64     |
|            |           |                |                                                   |          |
| 2572232472 | t3m_00828 | COG_category   | [G] Carbohydrate transport and metabolism         |          |
| 2572232472 | t3m_00828 | COG2814        | Arabinose efflux permease                         | 3.00E-04 |
| 2572232472 | t3m_00828 | pfam07690      | MFS_1                                             | 7.60E-18 |
| 2572232472 | t3m_00828 | Locus_type     | CDS                                               |          |
| 2572232472 | t3m_00828 | Product_name   | Arabinose efflux permease                         |          |
| 2572232472 | t3m_00828 | Scaffold       | t3m_contig_70_106_len_37820_read_count_3081661.14 |          |
| 2572232472 | t3m_00828 | Coordinates    | 33708..35171(-)                                   |          |
| 2572232472 | t3m_00828 | DNA_length     | 1464bp                                            |          |
| 2572232472 | t3m_00828 | Protein_length | 487aa                                             |          |
| 2572232472 | t3m_00828 | GC             |                                                   | 0.68     |
| 2572232472 | t3m_00828 | Transmembrane  | Yes                                               |          |
|            |           |                |                                                   |          |
| 2572232473 | t3m_00829 | Locus_type     | CDS                                               |          |
| 2572232473 | t3m_00829 | Product_name   | hypothetical protein                              |          |
| 2572232473 | t3m_00829 | Scaffold       | t3m_contig_70_106_len_37820_read_count_3081661.14 |          |
| 2572232473 | t3m_00829 | Coordinates    | 35226..35951(-)                                   |          |
| 2572232473 | t3m_00829 | DNA_length     | 726bp                                             |          |
| 2572232473 | t3m_00829 | Protein_length | 241aa                                             |          |

|            |           |                |                                                                 |          |
|------------|-----------|----------------|-----------------------------------------------------------------|----------|
| 2572232473 | t3m_00829 | GC             |                                                                 | 0.68     |
| 2572232474 | t3m_00830 | COG_category   | [K] Transcription                                               |          |
| 2572232474 | t3m_00830 | COG3620        | Predicted transcriptional regulator with C-terminal CBS domains | 5.00E-34 |
| 2572232474 | t3m_00830 | pfam01381      | HTH_3                                                           | 4.00E-11 |
| 2572232474 | t3m_00830 | pfam00571      | CBS                                                             | 5.70E-15 |
| 2572232474 | t3m_00830 | Locus_type     | CDS                                                             |          |
| 2572232474 | t3m_00830 | Product_name   | Predicted transcriptional regulator with C-terminal CBS domains |          |
| 2572232474 | t3m_00830 | Scaffold       | t3m_contig_70_106_len_37820_read_count_3081661.14               |          |
| 2572232474 | t3m_00830 | Coordinates    | 36051..36629(-)                                                 |          |
| 2572232474 | t3m_00830 | DNA_length     | 579bp                                                           |          |
| 2572232474 | t3m_00830 | Protein_length | 192aa                                                           |          |
| 2572232474 | t3m_00830 | GC             |                                                                 | 0.71     |
| 2572232475 | t3m_00831 | Locus_type     | CDS                                                             |          |
| 2572232475 | t3m_00831 | Product_name   | hypothetical protein                                            |          |
| 2572232475 | t3m_00831 | Scaffold       | t3m_contig_70_106_len_37820_read_count_3081661.14               |          |
| 2572232475 | t3m_00831 | Coordinates    | 36744..36998(+)                                                 |          |
| 2572232475 | t3m_00831 | DNA_length     | 255bp                                                           |          |
| 2572232475 | t3m_00831 | Protein_length | 84aa                                                            |          |
| 2572232475 | t3m_00831 | GC             |                                                                 | 0.67     |
| 2572232476 | t3m_00832 | Locus_type     | CDS                                                             |          |
| 2572232476 | t3m_00832 | Product_name   | hypothetical protein                                            |          |
| 2572232476 | t3m_00832 | Scaffold       | t3m_contig_70_106_len_37820_read_count_3081661.14               |          |
| 2572232476 | t3m_00832 | Coordinates    | 37086..37817(+)                                                 |          |
| 2572232476 | t3m_00832 | DNA_length     | 732bp                                                           |          |
| 2572232476 | t3m_00832 | Protein_length | 244aa                                                           |          |
| 2572232476 | t3m_00832 | GC             |                                                                 | 0.64     |
| 2572232477 | t3m_00833 | Locus_type     | CDS                                                             |          |
| 2572232477 | t3m_00833 | Product_name   | hypothetical protein                                            |          |
| 2572232477 | t3m_00833 | Scaffold       | t3m_contig_70_116_len_36300_read_count_2853038.15               |          |
| 2572232477 | t3m_00833 | Coordinates    | 40..1200(+)                                                     |          |

|            |           |                |                                                                           |           |
|------------|-----------|----------------|---------------------------------------------------------------------------|-----------|
| 2572232477 | t3m_00833 | DNA_length     | 1161bp                                                                    |           |
| 2572232477 | t3m_00833 | Protein_length | 386aa                                                                     |           |
| 2572232477 | t3m_00833 | GC             |                                                                           | 0.67      |
| 2572232478 | t3m_00834 | Locus_type     | CDS                                                                       |           |
| 2572232478 | t3m_00834 | Product_name   | hypothetical protein                                                      |           |
| 2572232478 | t3m_00834 | Scaffold       | t3m_contig_70_116_len_36300_read_count_2853038.15                         |           |
| 2572232478 | t3m_00834 | Coordinates    | 1200..4310(+)                                                             |           |
| 2572232478 | t3m_00834 | DNA_length     | 3111bp                                                                    |           |
| 2572232478 | t3m_00834 | Protein_length | 1036aa                                                                    |           |
| 2572232478 | t3m_00834 | GC             |                                                                           | 0.71      |
| 2572232479 | t3m_00835 | KEGG_module    | M00222: Phosphate transport system                                        |           |
| 2572232479 | t3m_00835 | COG_category   | [P] Inorganic ion transport and metabolism                                |           |
| 2572232479 | t3m_00835 | COG1117        | ABC-type phosphate transport system, ATPase component                     | 6.00E-110 |
| 2572232479 | t3m_00835 | pfam00005      | ABC_tran                                                                  | 1.10E-33  |
| 2572232479 | t3m_00835 | EC:3.6.3.27    | Phosphate-transporting ATPase.                                            |           |
| 2572232479 | t3m_00835 | TIGR00972      | phosphate ABC transporter, ATP-binding protein                            | 3.40E-108 |
| 2572232479 | t3m_00835 | KO:K02036      | phosphate transport system ATP-binding protein [EC:3.6.3.27]              | 0.00E+00  |
| 2572232479 | t3m_00835 | ITERM:05785    | phosphate ABC transporter ATP-binding protein, PhoT family (TC 3.A.1.7.1) |           |
| 2572232479 | t3m_00835 | Locus_type     | CDS                                                                       |           |
| 2572232479 | t3m_00835 | Product_name   | phosphate ABC transporter ATP-binding protein, PhoT family (TC 3.A.1.7    |           |
| 2572232479 | t3m_00835 | Scaffold       | t3m_contig_70_116_len_36300_read_count_2853038.15                         |           |
| 2572232479 | t3m_00835 | Coordinates    | 4329..5084(-)                                                             |           |
| 2572232479 | t3m_00835 | DNA_length     | 756bp                                                                     |           |
| 2572232479 | t3m_00835 | Protein_length | 251aa                                                                     |           |
| 2572232479 | t3m_00835 | GC             |                                                                           | 0.68      |
| 2572232480 | t3m_00836 | KEGG_module    | M00222: Phosphate transport system                                        |           |
| 2572232480 | t3m_00836 | COG_category   | [P] Inorganic ion transport and metabolism                                |           |
| 2572232480 | t3m_00836 | COG0573        | ABC-type phosphate transport system, permease component                   | 4.00E-67  |
| 2572232480 | t3m_00836 | pfam00528      | BPD_transp_1                                                              | 5.70E-16  |
| 2572232480 | t3m_00836 | pfam00528      | BPD_transp_1                                                              | 2.40E-14  |
| 2572232480 | t3m_00836 | TIGR00974      | phosphate ABC transporter, permease protein PstA                          | 1.10E-69  |

|            |           |                |                                                                          |          |
|------------|-----------|----------------|--------------------------------------------------------------------------|----------|
| 2572232480 | t3m_00836 | TIGR02138      | phosphate ABC transporter, permease protein PstC                         | 7.00E-90 |
| 2572232480 | t3m_00836 | KO:K02038      | phosphate transport system permease protein                              | 0.00E+00 |
| 2572232480 | t3m_00836 | ITERM:06114    | phosphate ABC transporter membrane protein 2, PhoT family (TC 3.A.1.7.1) |          |
| 2572232480 | t3m_00836 | Locus_type     | CDS                                                                      |          |
| 2572232480 | t3m_00836 | Product_name   | phosphate ABC transporter membrane protein 2, PhoT family (TC 3.A.1.7.1) |          |
| 2572232480 | t3m_00836 | Scaffold       | t3m_contig_70_116_len_36300_read_count_2853038.15                        |          |
| 2572232480 | t3m_00836 | Coordinates    | 5091..7037(-)                                                            |          |
| 2572232480 | t3m_00836 | DNA_length     | 1947bp                                                                   |          |
| 2572232480 | t3m_00836 | Protein_length | 648aa                                                                    |          |
| 2572232480 | t3m_00836 | GC             |                                                                          | 0.66     |
| 2572232480 | t3m_00836 | Transmembrane  | Yes                                                                      |          |
| 2572232480 | t3m_00836 | Fused_gene     | Yes                                                                      |          |
| 2572232481 | t3m_00837 | KEGG_module    | M00222: Phosphate transport system                                       |          |
| 2572232481 | t3m_00837 | COG_category   | [P] Inorganic ion transport and metabolism                               |          |
| 2572232481 | t3m_00837 | COG0226        | ABC-type phosphate transport system, periplasmic component               | 3.00E-28 |
| 2572232481 | t3m_00837 | pfam12849      | PBP_like_2                                                               | 2.20E-37 |
| 2572232481 | t3m_00837 | TIGR00975      | phosphate ABC transporter, phosphate-binding protein                     | 6.40E-69 |
| 2572232481 | t3m_00837 | KO:K02040      | phosphate transport system substrate-binding protein                     | 0.00E+00 |
| 2572232481 | t3m_00837 | Locus_type     | CDS                                                                      |          |
| 2572232481 | t3m_00837 | Product_name   | phosphate ABC transporter, phosphate-binding protein                     |          |
| 2572232481 | t3m_00837 | Scaffold       | t3m_contig_70_116_len_36300_read_count_2853038.15                        |          |
| 2572232481 | t3m_00837 | Coordinates    | 7129..8310(-)                                                            |          |
| 2572232481 | t3m_00837 | DNA_length     | 1182bp                                                                   |          |
| 2572232481 | t3m_00837 | Protein_length | 393aa                                                                    |          |
| 2572232481 | t3m_00837 | GC             |                                                                          | 0.63     |
| 2572232481 | t3m_00837 | Transmembrane  | Yes                                                                      |          |
| 2572232482 | t3m_00838 | KEGG_module    | M00176: Sulfur reduction, sulfate => H2S                                 |          |
| 2572232482 | t3m_00838 | Metacyc        | PWY-5340: sulfate activation for sulfonation                             |          |
| 2572232482 | t3m_00838 | COG_category   | [P] Inorganic ion transport and metabolism                               |          |
| 2572232482 | t3m_00838 | COG0529        | Adenylylsulfate kinase and related kinases                               | 4.00E-52 |
| 2572232482 | t3m_00838 | pfam01583      | APS_kinase                                                               | 4.90E-52 |
| 2572232482 | t3m_00838 | EC:2.7.1.25    | Adenylyl-sulfate kinase.                                                 |          |

|            |           |                |                                                   |          |
|------------|-----------|----------------|---------------------------------------------------|----------|
| 2572232482 | t3m_00838 | TIGR00455      | adenylylsulfate kinase (apsK)                     | 5.80E-58 |
| 2572232482 | t3m_00838 | KO:K00860      | adenylylsulfate kinase [EC:2.7.1.25]              | 0.00E+00 |
| 2572232482 | t3m_00838 | Locus_type     | CDS                                               |          |
| 2572232482 | t3m_00838 | Product_name   | adenylylsulfate kinase (apsK)                     |          |
| 2572232482 | t3m_00838 | Scaffold       | t3m_contig_70_116_len_36300_read_count_2853038.15 |          |
| 2572232482 | t3m_00838 | Coordinates    | 8690..9256(+)                                     |          |
| 2572232482 | t3m_00838 | DNA_length     | 567bp                                             |          |
| 2572232482 | t3m_00838 | Protein_length | 188aa                                             |          |
| 2572232482 | t3m_00838 | GC             |                                                   | 0.66     |
| 2572232483 | t3m_00839 | COG_category   | [S] Function unknown                              |          |
| 2572232483 | t3m_00839 | COG4068        | Uncharacterized protein containing a Zn-ribbon    | 8.00E-05 |
| 2572232483 | t3m_00839 | pfam09889      | DUF2116                                           | 3.90E-11 |
| 2572232483 | t3m_00839 | Locus_type     | CDS                                               |          |
| 2572232483 | t3m_00839 | Product_name   | Uncharacterized protein containing a Zn-ribbon    |          |
| 2572232483 | t3m_00839 | Scaffold       | t3m_contig_70_116_len_36300_read_count_2853038.15 |          |
| 2572232483 | t3m_00839 | Coordinates    | 9371..9562(+)                                     |          |
| 2572232483 | t3m_00839 | DNA_length     | 192bp                                             |          |
| 2572232483 | t3m_00839 | Protein_length | 63aa                                              |          |
| 2572232483 | t3m_00839 | GC             |                                                   | 0.66     |
| 2572232483 | t3m_00839 | Transmembrane  | Yes                                               |          |
| 2572232484 | t3m_00840 | COG_category   | [R] General function prediction only              |          |
| 2572232484 | t3m_00840 | COG1019        | Predicted nucleotidyltransferase                  | 9.00E-31 |
| 2572232484 | t3m_00840 | pfam01467      | CTP_transf_2                                      | 4.70E-07 |
| 2572232484 | t3m_00840 | TIGR00125      | cytidyltransferase-like domain                    | 1.80E-14 |
| 2572232484 | t3m_00840 | Locus_type     | CDS                                               |          |
| 2572232484 | t3m_00840 | Product_name   | cytidyltransferase-like domain                    |          |
| 2572232484 | t3m_00840 | Scaffold       | t3m_contig_70_116_len_36300_read_count_2853038.15 |          |
| 2572232484 | t3m_00840 | Coordinates    | 9576..10376(+)                                    |          |
| 2572232484 | t3m_00840 | DNA_length     | 801bp                                             |          |
| 2572232484 | t3m_00840 | Protein_length | 266aa                                             |          |
| 2572232484 | t3m_00840 | GC             |                                                   | 0.72     |

|            |           |                |                                                        |          |
|------------|-----------|----------------|--------------------------------------------------------|----------|
| 2572232485 | t3m_00841 | Locus_type     | CDS                                                    |          |
| 2572232485 | t3m_00841 | Product_name   | hypothetical protein                                   |          |
| 2572232485 | t3m_00841 | Scaffold       | t3m_contig_70_116_len_36300_read_count_2853038.15      |          |
| 2572232485 | t3m_00841 | Coordinates    | 10415..10636(+)                                        |          |
| 2572232485 | t3m_00841 | DNA_length     | 222bp                                                  |          |
| 2572232485 | t3m_00841 | Protein_length | 73aa                                                   |          |
| 2572232485 | t3m_00841 | GC             |                                                        | 0.67     |
| 2572232486 | t3m_00842 | COG_category   | [S] Function unknown                                   |          |
| 2572232486 | t3m_00842 | COG4004        | Uncharacterized protein conserved in archaea           | 6.00E-11 |
| 2572232486 | t3m_00842 | Locus_type     | CDS                                                    |          |
| 2572232486 | t3m_00842 | Product_name   | Uncharacterized protein conserved in archaea           |          |
| 2572232486 | t3m_00842 | Scaffold       | t3m_contig_70_116_len_36300_read_count_2853038.15      |          |
| 2572232486 | t3m_00842 | Coordinates    | 10704..11030(+)                                        |          |
| 2572232486 | t3m_00842 | DNA_length     | 327bp                                                  |          |
| 2572232486 | t3m_00842 | Protein_length | 108aa                                                  |          |
| 2572232486 | t3m_00842 | GC             |                                                        | 0.69     |
| 2572232487 | t3m_00843 | pfam02163      | Peptidase_M50                                          | 4.10E-12 |
| 2572232487 | t3m_00843 | Locus_type     | CDS                                                    |          |
| 2572232487 | t3m_00843 | Product_name   | Peptidase family M50                                   |          |
| 2572232487 | t3m_00843 | Scaffold       | t3m_contig_70_116_len_36300_read_count_2853038.15      |          |
| 2572232487 | t3m_00843 | Coordinates    | 11034..12632(+)                                        |          |
| 2572232487 | t3m_00843 | DNA_length     | 1599bp                                                 |          |
| 2572232487 | t3m_00843 | Protein_length | 532aa                                                  |          |
| 2572232487 | t3m_00843 | GC             |                                                        | 0.68     |
| 2572232487 | t3m_00843 | Transmembrane  | Yes                                                    |          |
| 2572232488 | t3m_00844 | COG_category   | [L] Replication, recombination and repair              |          |
| 2572232488 | t3m_00844 | COG1041        | Predicted DNA modification methylase                   | 7.00E-43 |
| 2572232488 | t3m_00844 | pfam01170      | UPF0020                                                | 3.30E-26 |
| 2572232488 | t3m_00844 | EC:2.1.1.213   | tRNA (guanine(10)-N(2))-dimethyltransferase.           |          |
| 2572232488 | t3m_00844 | TIGR01177      | TIGR01177 family protein                               | 2.60E-55 |
| 2572232488 | t3m_00844 | KO:K07446      | tRNA (guanine10-N2)-dimethyltransferase [EC:2.1.1.213] | 5.30E-32 |

|            |           |                |                                                                 |          |
|------------|-----------|----------------|-----------------------------------------------------------------|----------|
| 2572232488 | t3m_00844 | Locus_type     | CDS                                                             |          |
| 2572232488 | t3m_00844 | Product_name   | Predicted DNA modification methylase                            |          |
| 2572232488 | t3m_00844 | Scaffold       | t3m_contig_70_116_len_36300_read_count_2853038.15               |          |
| 2572232488 | t3m_00844 | Coordinates    | 12613..13638(-)                                                 |          |
| 2572232488 | t3m_00844 | DNA_length     | 1026bp                                                          |          |
| 2572232488 | t3m_00844 | Protein_length | 341aa                                                           |          |
| 2572232488 | t3m_00844 | GC             |                                                                 | 0.71     |
|            |           |                |                                                                 |          |
| 2572232489 | t3m_00845 | COG_category   | [S] Function unknown                                            |          |
| 2572232489 | t3m_00845 | COG1656        | Uncharacterized conserved protein                               | 9.00E-22 |
| 2572232489 | t3m_00845 | pfam01927      | Mut7-C                                                          | 2.50E-29 |
| 2572232489 | t3m_00845 | KO:K09122      | hypothetical protein                                            | 1.50E-18 |
| 2572232489 | t3m_00845 | Locus_type     | CDS                                                             |          |
| 2572232489 | t3m_00845 | Product_name   | Uncharacterized conserved protein                               |          |
| 2572232489 | t3m_00845 | Scaffold       | t3m_contig_70_116_len_36300_read_count_2853038.15               |          |
| 2572232489 | t3m_00845 | Coordinates    | 13635..14081(-)                                                 |          |
| 2572232489 | t3m_00845 | DNA_length     | 447bp                                                           |          |
| 2572232489 | t3m_00845 | Protein_length | 148aa                                                           |          |
| 2572232489 | t3m_00845 | GC             |                                                                 | 0.7      |
|            |           |                |                                                                 |          |
| 2572232490 | t3m_00846 | KEGG_module    | M00114: Ascorbate biosynthesis, plants, glucose-6P => ascorbate |          |
| 2572232490 | t3m_00846 | Metacyc        | GLYCOCAT-PWY: glycogen degradation I                            |          |
| 2572232490 | t3m_00846 | Metacyc        | PWY-622: starch biosynthesis                                    |          |
| 2572232490 | t3m_00846 | Metacyc        | GLUCOSE1PMETAB-PWY: glucose and glucose-1-phosphate degradation |          |
| 2572232490 | t3m_00846 | Metacyc        | PWY-621: sucrose degradation III                                |          |
| 2572232490 | t3m_00846 | Metacyc        | PWY-6737: starch degradation V                                  |          |
| 2572232490 | t3m_00846 | Metacyc        | PWY-5661: GDP-glucose biosynthesis                              |          |
| 2572232490 | t3m_00846 | Metacyc        | PWY-5384: sucrose degradation IV                                |          |
| 2572232490 | t3m_00846 | Metacyc        | PWY-5659: GDP-mannose biosynthesis                              |          |
| 2572232490 | t3m_00846 | Metacyc        | PWY-5940: streptomycin biosynthesis                             |          |
| 2572232490 | t3m_00846 | Metacyc        | PWY-5941: glycogen degradation II                               |          |
| 2572232490 | t3m_00846 | Metacyc        | PWY-842: starch degradation I                                   |          |
| 2572232490 | t3m_00846 | Metacyc        | PWY-3801: sucrose degradation VI (anaerobic)                    |          |
| 2572232490 | t3m_00846 | Metacyc        | SUCSYN-PWY: sucrose biosynthesis                                |          |



|            |           |                |                                                              |           |
|------------|-----------|----------------|--------------------------------------------------------------|-----------|
| 2572232490 | t3m_00846 | Metacyc        | PWY-6731: starch degradation III                             |           |
| 2572232490 | t3m_00846 | Metacyc        | PWY-882: L-ascorbate biosynthesis I (L-galactose pathway)    |           |
| 2572232490 | t3m_00846 | COG_category   | [G] Carbohydrate transport and metabolism                    |           |
| 2572232490 | t3m_00846 | COG1109        | Phosphomannomutase                                           | 1.00E-107 |
| 2572232490 | t3m_00846 | pfam02879      | PGM_PMM_II                                                   | 4.40E-23  |
| 2572232490 | t3m_00846 | pfam02878      | PGM_PMM_I                                                    | 4.80E-36  |
| 2572232490 | t3m_00846 | pfam00408      | PGM_PMM_IV                                                   | 4.50E-09  |
| 2572232490 | t3m_00846 | pfam02880      | PGM_PMM_III                                                  | 1.10E-22  |
| 2572232490 | t3m_00846 | EC:5.4.2.2     | Phosphoglucomutase.                                          |           |
| 2572232490 | t3m_00846 | EC:5.4.2.8     | Phosphomannomutase.                                          |           |
| 2572232490 | t3m_00846 | TIGR03990      | phosphoglucosamine mutase                                    | 0.00E+00  |
| 2572232490 | t3m_00846 | KO:K15778      | phosphomannomutase / phosphoglucomutase [EC:5.4.2.8 5.4.2.2] | 0.00E+00  |
| 2572232490 | t3m_00846 | Locus_type     | CDS                                                          |           |
| 2572232490 | t3m_00846 | Product_name   | phosphoglucosamine mutase                                    |           |
| 2572232490 | t3m_00846 | Scaffold       | t3m_contig_70_116_len_36300_read_count_2853038.15            |           |
| 2572232490 | t3m_00846 | Coordinates    | 14189..15565(+)                                              |           |
| 2572232490 | t3m_00846 | DNA_length     | 1377bp                                                       |           |
| 2572232490 | t3m_00846 | Protein_length | 458aa                                                        |           |
| 2572232490 | t3m_00846 | GC             |                                                              | 0.69      |
| 2572232491 | t3m_00847 | COG_category   | [S] Function unknown                                         |           |
| 2572232491 | t3m_00847 | COG4272        | Predicted membrane protein                                   | 5.00E-06  |
| 2572232491 | t3m_00847 | pfam07843      | DUF1634                                                      | 1.70E-14  |
| 2572232491 | t3m_00847 | Locus_type     | CDS                                                          |           |
| 2572232491 | t3m_00847 | Product_name   | Predicted membrane protein                                   |           |
| 2572232491 | t3m_00847 | Scaffold       | t3m_contig_70_116_len_36300_read_count_2853038.15            |           |
| 2572232491 | t3m_00847 | Coordinates    | 15594..16019(-)                                              |           |
| 2572232491 | t3m_00847 | DNA_length     | 426bp                                                        |           |
| 2572232491 | t3m_00847 | Protein_length | 141aa                                                        |           |
| 2572232491 | t3m_00847 | GC             |                                                              | 0.69      |
| 2572232491 | t3m_00847 | Transmembrane  | Yes                                                          |           |
| 2572232492 | t3m_00848 | COG_category   | [R] General function prediction only                         |           |
| 2572232492 | t3m_00848 | COG0730        | Predicted permeases                                          | 2.00E-09  |

|            |           |                |                                                          |                                                   |           |
|------------|-----------|----------------|----------------------------------------------------------|---------------------------------------------------|-----------|
| 2572232492 | t3m_00848 | pfam01925      | TauE                                                     |                                                   | 3.50E-39  |
| 2572232492 | t3m_00848 | Locus_type     |                                                          | CDS                                               |           |
| 2572232492 | t3m_00848 | Product_name   |                                                          | Predicted permeases                               |           |
| 2572232492 | t3m_00848 | Scaffold       |                                                          | t3m_contig_70_116_len_36300_read_count_2853038.15 |           |
| 2572232492 | t3m_00848 | Coordinates    |                                                          | 16016..16891(-)                                   |           |
| 2572232492 | t3m_00848 | DNA_length     |                                                          | 876bp                                             |           |
| 2572232492 | t3m_00848 | Protein_length |                                                          | 291aa                                             |           |
| 2572232492 | t3m_00848 | GC             |                                                          |                                                   | 0.68      |
| 2572232492 | t3m_00848 | Transmembrane  |                                                          | Yes                                               |           |
| 2572232493 | t3m_00849 | Locus_type     |                                                          | CDS                                               |           |
| 2572232493 | t3m_00849 | Product_name   |                                                          | hypothetical protein                              |           |
| 2572232493 | t3m_00849 | Scaffold       |                                                          | t3m_contig_70_116_len_36300_read_count_2853038.15 |           |
| 2572232493 | t3m_00849 | Coordinates    |                                                          | 17077..17643(+)                                   |           |
| 2572232493 | t3m_00849 | DNA_length     |                                                          | 567bp                                             |           |
| 2572232493 | t3m_00849 | Protein_length |                                                          | 188aa                                             |           |
| 2572232493 | t3m_00849 | GC             |                                                          |                                                   | 0.71      |
| 2572232494 | t3m_00850 | KEGG_module    | M00176: Sulfur reduction, sulfate => H2S                 |                                                   |           |
| 2572232494 | t3m_00850 | Metacyc        | PWY-6683: sulfate reduction III (assimilatory)           |                                                   |           |
| 2572232494 | t3m_00850 | Metacyc        | SULFMETII-PWY: sulfate reduction II (assimilatory)       |                                                   |           |
| 2572232494 | t3m_00850 | Metacyc        | PWY-5278: sulfite oxidation III                          |                                                   |           |
| 2572232494 | t3m_00850 | Metacyc        | PWY-6932: selenate reduction                             |                                                   |           |
| 2572232494 | t3m_00850 | Metacyc        | PWY-5340: sulfate activation for sulfonation             |                                                   |           |
| 2572232494 | t3m_00850 | Metacyc        | P224-PWY: sulfate reduction V (dissimilatory)            |                                                   |           |
| 2572232494 | t3m_00850 | Metacyc        | DISSULFRED-PWY: sulfate reduction IV (dissimilatory)     |                                                   |           |
| 2572232494 | t3m_00850 | IMG_pathway    | 870: Dissimilatory sulfate conversion to adenylylsulfate |                                                   |           |
| 2572232494 | t3m_00850 | COG_category   | [P] Inorganic ion transport and metabolism               |                                                   |           |
| 2572232494 | t3m_00850 | COG2046        | ATP sulfurylase (sulfate adenylyltransferase)            |                                                   | 2.00E-102 |
| 2572232494 | t3m_00850 | pfam14306      | PUA_2                                                    |                                                   | 1.80E-36  |
| 2572232494 | t3m_00850 | pfam01747      | ATP-sulfurylase                                          |                                                   | 5.60E-74  |
| 2572232494 | t3m_00850 | EC:2.7.7.4     | Sulfate adenylyltransferase.                             |                                                   |           |
| 2572232494 | t3m_00850 | TIGR00339      | ATP sulphurylase                                         |                                                   | 1.80E-97  |
| 2572232494 | t3m_00850 | KO:K00958      | sulfate adenylyltransferase [EC:2.7.7.4]                 |                                                   | 0.00E+00  |

|            |           |                |                                                                      |          |
|------------|-----------|----------------|----------------------------------------------------------------------|----------|
| 2572232494 | t3m_00850 | ITERM:02082    | sulfate adenylyltransferase (EC 2.7.7.4)                             |          |
| 2572232494 | t3m_00850 | Locus_type     | CDS                                                                  |          |
| 2572232494 | t3m_00850 | Product_name   | sulfate adenylyltransferase (EC 2.7.7.4)                             |          |
| 2572232494 | t3m_00850 | Scaffold       | t3m_contig_70_116_len_36300_read_count_2853038.15                    |          |
| 2572232494 | t3m_00850 | Coordinates    | 17663..18838(+)                                                      |          |
| 2572232494 | t3m_00850 | DNA_length     | 1176bp                                                               |          |
| 2572232494 | t3m_00850 | Protein_length | 391aa                                                                |          |
| 2572232494 | t3m_00850 | GC             |                                                                      | 0.69     |
| 2572232495 | t3m_00851 | KEGG_module    | M00176: Sulfur reduction, sulfate => H2S                             |          |
| 2572232495 | t3m_00851 | Metacyc        | PWY-5340: sulfate activation for sulfonation                         |          |
| 2572232495 | t3m_00851 | COG_category   | [P] Inorganic ion transport and metabolism                           |          |
| 2572232495 | t3m_00851 | COG0529        | Adenylylsulfate kinase and related kinases                           | 3.00E-57 |
| 2572232495 | t3m_00851 | pfam01583      | APS_kinase                                                           | 7.40E-61 |
| 2572232495 | t3m_00851 | EC:2.7.1.25    | Adenylyl-sulfate kinase.                                             |          |
| 2572232495 | t3m_00851 | TIGR00455      | adenylylsulfate kinase (apsK)                                        | 2.00E-63 |
| 2572232495 | t3m_00851 | KO:K00860      | adenylylsulfate kinase [EC:2.7.1.25]                                 | 0.00E+00 |
| 2572232495 | t3m_00851 | Locus_type     | CDS                                                                  |          |
| 2572232495 | t3m_00851 | Product_name   | adenylylsulfate kinase (apsK)                                        |          |
| 2572232495 | t3m_00851 | Scaffold       | t3m_contig_70_116_len_36300_read_count_2853038.15                    |          |
| 2572232495 | t3m_00851 | Coordinates    | 18898..19482(+)                                                      |          |
| 2572232495 | t3m_00851 | DNA_length     | 585bp                                                                |          |
| 2572232495 | t3m_00851 | Protein_length | 194aa                                                                |          |
| 2572232495 | t3m_00851 | GC             |                                                                      | 0.69     |
| 2572232496 | t3m_00852 | KEGG_module    | M00248: Putative antibiotic transport system                         |          |
| 2572232496 | t3m_00852 | COG_category   | [G] Carbohydrate transport and metabolism                            |          |
| 2572232496 | t3m_00852 | COG_category   | [M] Cell wall/membrane/envelope biogenesis                           |          |
| 2572232496 | t3m_00852 | COG1682        | ABC-type polysaccharide/polyol phosphate export systems, permease c  | 1.00E-07 |
| 2572232496 | t3m_00852 | pfam01061      | ABC2_membrane                                                        | 1.50E-28 |
| 2572232496 | t3m_00852 | TIGR01247      | daunorubicin resistance ABC transporter membrane protein             | 1.50E-41 |
| 2572232496 | t3m_00852 | KO:K09686      | antibiotic transport system permease protein                         | 0.00E+00 |
| 2572232496 | t3m_00852 | Locus_type     | CDS                                                                  |          |
| 2572232496 | t3m_00852 | Product_name   | ABC-type polysaccharide/polyol phosphate export systems, permease cc |          |

|            |           |                |                                                                      |          |
|------------|-----------|----------------|----------------------------------------------------------------------|----------|
| 2572232496 | t3m_00852 | Scaffold       | t3m_contig_70_116_len_36300_read_count_2853038.15                    |          |
| 2572232496 | t3m_00852 | Coordinates    | 19543..20304(-)                                                      |          |
| 2572232496 | t3m_00852 | DNA_length     | 762bp                                                                |          |
| 2572232496 | t3m_00852 | Protein_length | 253aa                                                                |          |
| 2572232496 | t3m_00852 | GC             |                                                                      | 0.64     |
| 2572232496 | t3m_00852 | Transmembrane  | Yes                                                                  |          |
| 2572232497 | t3m_00853 | KEGG_module    | M00248: Putative antibiotic transport system                         |          |
| 2572232497 | t3m_00853 | COG_category   | [V] Defense mechanisms                                               |          |
| 2572232497 | t3m_00853 | COG1131        | ABC-type multidrug transport system, ATPase component                | 2.00E-71 |
| 2572232497 | t3m_00853 | pfam00005      | ABC_tran                                                             | 2.20E-28 |
| 2572232497 | t3m_00853 | pfam13732      | DUF4162                                                              | 4.80E-08 |
| 2572232497 | t3m_00853 | TIGR01188      | daunorubicin resistance ABC transporter ATP-binding subunit          | 1.50E-95 |
| 2572232497 | t3m_00853 | KO:K09687      | antibiotic transport system ATP-binding protein                      | 0.00E+00 |
| 2572232497 | t3m_00853 | Locus_type     | CDS                                                                  |          |
| 2572232497 | t3m_00853 | Product_name   | ABC-type multidrug transport system, ATPase component                |          |
| 2572232497 | t3m_00853 | Scaffold       | t3m_contig_70_116_len_36300_read_count_2853038.15                    |          |
| 2572232497 | t3m_00853 | Coordinates    | 20301..21290(-)                                                      |          |
| 2572232497 | t3m_00853 | DNA_length     | 990bp                                                                |          |
| 2572232497 | t3m_00853 | Protein_length | 329aa                                                                |          |
| 2572232497 | t3m_00853 | GC             |                                                                      | 0.66     |
| 2572232498 | t3m_00854 | pfam03551      | PadR                                                                 | 8.70E-15 |
| 2572232498 | t3m_00854 | Locus_type     | CDS                                                                  |          |
| 2572232498 | t3m_00854 | Product_name   | Transcriptional regulator PadR-like family                           |          |
| 2572232498 | t3m_00854 | Scaffold       | t3m_contig_70_116_len_36300_read_count_2853038.15                    |          |
| 2572232498 | t3m_00854 | Coordinates    | 21287..21769(-)                                                      |          |
| 2572232498 | t3m_00854 | DNA_length     | 483bp                                                                |          |
| 2572232498 | t3m_00854 | Protein_length | 160aa                                                                |          |
| 2572232498 | t3m_00854 | GC             |                                                                      | 0.72     |
| 2572232499 | t3m_00855 | COG_category   | [O] Posttranslational modification, protein turnover, chaperones     |          |
| 2572232499 | t3m_00855 | COG0229        | Conserved domain frequently associated with peptide methionine sulfo | 2.00E-34 |
| 2572232499 | t3m_00855 | pfam01641      | SelR                                                                 | 9.90E-39 |

|            |           |                |                                                                      |          |
|------------|-----------|----------------|----------------------------------------------------------------------|----------|
| 2572232499 | t3m_00855 | EC:1.8.4.12    | Peptide-methionine (R)-S-oxide reductase.                            |          |
| 2572232499 | t3m_00855 | TIGR00357      | methionine-R-sulfoxide reductase                                     | 1.50E-35 |
| 2572232499 | t3m_00855 | KO:K07305      | peptide-methionine (R)-S-oxide reductase [EC:1.8.4.12]               | 1.40E-45 |
| 2572232499 | t3m_00855 | Locus_type     | CDS                                                                  |          |
| 2572232499 | t3m_00855 | Product_name   | Conserved domain frequently associated with peptide methionine sulfo |          |
| 2572232499 | t3m_00855 | Scaffold       | t3m_contig_70_116_len_36300_read_count_2853038.15                    |          |
| 2572232499 | t3m_00855 | Coordinates    | 22055..22378(+)                                                      |          |
| 2572232499 | t3m_00855 | DNA_length     | 324bp                                                                |          |
| 2572232499 | t3m_00855 | Protein_length | 107aa                                                                |          |
| 2572232499 | t3m_00855 | GC             |                                                                      | 0.65     |
| 2572232500 | t3m_00856 | pfam13620      | CarboxypepD_reg                                                      | 1.60E-07 |
| 2572232500 | t3m_00856 | Locus_type     | CDS                                                                  |          |
| 2572232500 | t3m_00856 | Product_name   | Carboxypeptidase regulatory-like domain                              |          |
| 2572232500 | t3m_00856 | Scaffold       | t3m_contig_70_116_len_36300_read_count_2853038.15                    |          |
| 2572232500 | t3m_00856 | Coordinates    | 22841..24142(+)                                                      |          |
| 2572232500 | t3m_00856 | DNA_length     | 1302bp                                                               |          |
| 2572232500 | t3m_00856 | Protein_length | 433aa                                                                |          |
| 2572232500 | t3m_00856 | GC             |                                                                      | 0.65     |
| 2572232500 | t3m_00856 | Transmembrane  | Yes                                                                  |          |
| 2572232501 | t3m_00857 | Locus_type     | CDS                                                                  |          |
| 2572232501 | t3m_00857 | Product_name   | hypothetical protein                                                 |          |
| 2572232501 | t3m_00857 | Scaffold       | t3m_contig_70_116_len_36300_read_count_2853038.15                    |          |
| 2572232501 | t3m_00857 | Coordinates    | 24420..24809(-)                                                      |          |
| 2572232501 | t3m_00857 | DNA_length     | 390bp                                                                |          |
| 2572232501 | t3m_00857 | Protein_length | 129aa                                                                |          |
| 2572232501 | t3m_00857 | GC             |                                                                      | 0.58     |
| 2572232502 | t3m_00858 | Locus_type     | tRNA                                                                 |          |
| 2572232502 | t3m_00858 | Product_name   | tRNA_Arg_CCT                                                         |          |
| 2572232502 | t3m_00858 | Scaffold       | t3m_contig_70_116_len_36300_read_count_2853038.15                    |          |
| 2572232502 | t3m_00858 | Coordinates    | 25050..25124(-)                                                      |          |
| 2572232502 | t3m_00858 | DNA_length     | 75bp                                                                 |          |

|            |           |                |                                                               |           |
|------------|-----------|----------------|---------------------------------------------------------------|-----------|
| 2572232502 | t3m_00858 | GC             |                                                               | 0.68      |
| 2572232503 | t3m_00859 | Locus_type     | CDS                                                           |           |
| 2572232503 | t3m_00859 | Product_name   | hypothetical protein                                          |           |
| 2572232503 | t3m_00859 | Scaffold       | t3m_contig_70_116_len_36300_read_count_2853038.15             |           |
| 2572232503 | t3m_00859 | Coordinates    | 25153..26226(-)                                               |           |
| 2572232503 | t3m_00859 | DNA_length     | 1074bp                                                        |           |
| 2572232503 | t3m_00859 | Protein_length | 357aa                                                         |           |
| 2572232503 | t3m_00859 | GC             |                                                               | 0.72      |
| 2572232504 | t3m_00860 | Locus_type     | CDS                                                           |           |
| 2572232504 | t3m_00860 | Product_name   | hypothetical protein                                          |           |
| 2572232504 | t3m_00860 | Scaffold       | t3m_contig_70_116_len_36300_read_count_2853038.15             |           |
| 2572232504 | t3m_00860 | Coordinates    | 26315..27817(+)                                               |           |
| 2572232504 | t3m_00860 | DNA_length     | 1503bp                                                        |           |
| 2572232504 | t3m_00860 | Protein_length | 500aa                                                         |           |
| 2572232504 | t3m_00860 | GC             |                                                               | 0.66      |
| 2572232504 | t3m_00860 | Transmembrane  | Yes                                                           |           |
| 2572232505 | t3m_00861 | COG_category   | [J] Translation, ribosomal structure and biogenesis           |           |
| 2572232505 | t3m_00861 | COG1503        | Peptide chain release factor 1 (eRF1)                         | 4.00E-114 |
| 2572232505 | t3m_00861 | pfam03465      | eRF1_3                                                        | 2.30E-25  |
| 2572232505 | t3m_00861 | pfam03463      | eRF1_1                                                        | 2.50E-13  |
| 2572232505 | t3m_00861 | pfam03464      | eRF1_2                                                        | 1.50E-35  |
| 2572232505 | t3m_00861 | TIGR03676      | peptide chain release factor 1, archaeal and eukaryotic forms | 0.00E+00  |
| 2572232505 | t3m_00861 | KO:K03265      | peptide chain release factor subunit 1                        | 0.00E+00  |
| 2572232505 | t3m_00861 | Locus_type     | CDS                                                           |           |
| 2572232505 | t3m_00861 | Product_name   | peptide chain release factor 1, archaeal and eukaryotic forms |           |
| 2572232505 | t3m_00861 | Scaffold       | t3m_contig_70_116_len_36300_read_count_2853038.15             |           |
| 2572232505 | t3m_00861 | Coordinates    | 27928..29223(-)                                               |           |
| 2572232505 | t3m_00861 | DNA_length     | 1296bp                                                        |           |
| 2572232505 | t3m_00861 | Protein_length | 431aa                                                         |           |
| 2572232505 | t3m_00861 | GC             |                                                               | 0.66      |

|            |           |                |                                            |                                                   |          |
|------------|-----------|----------------|--------------------------------------------|---------------------------------------------------|----------|
| 2572232506 | t3m_00862 | pfam00085      | Thioredoxin                                |                                                   | 4.80E-12 |
| 2572232506 | t3m_00862 | Locus_type     |                                            | CDS                                               |          |
| 2572232506 | t3m_00862 | Product_name   |                                            | Thioredoxin                                       |          |
| 2572232506 | t3m_00862 | Scaffold       |                                            | t3m_contig_70_116_len_36300_read_count_2853038.15 |          |
| 2572232506 | t3m_00862 | Coordinates    |                                            | 29325..29540(-)                                   |          |
| 2572232506 | t3m_00862 | DNA_length     |                                            | 216bp                                             |          |
| 2572232506 | t3m_00862 | Protein_length |                                            | 71aa                                              |          |
| 2572232506 | t3m_00862 | GC             |                                            |                                                   | 0.61     |
| 2572232507 | t3m_00863 | COG_category   | [R] General function prediction only       |                                                   |          |
| 2572232507 | t3m_00863 | COG4122        | Predicted O-methyltransferase              |                                                   | 3.00E-06 |
| 2572232507 | t3m_00863 | pfam13578      | Methyltransf_24                            |                                                   | 7.60E-14 |
| 2572232507 | t3m_00863 | Locus_type     |                                            | CDS                                               |          |
| 2572232507 | t3m_00863 | Product_name   |                                            | Predicted O-methyltransferase                     |          |
| 2572232507 | t3m_00863 | Scaffold       |                                            | t3m_contig_70_116_len_36300_read_count_2853038.15 |          |
| 2572232507 | t3m_00863 | Coordinates    |                                            | 29790..30602(+)                                   |          |
| 2572232507 | t3m_00863 | DNA_length     |                                            | 813bp                                             |          |
| 2572232507 | t3m_00863 | Protein_length |                                            | 270aa                                             |          |
| 2572232507 | t3m_00863 | GC             |                                            |                                                   | 0.7      |
| 2572232508 | t3m_00864 | COG_category   | [H] Coenzyme transport and metabolism      |                                                   |          |
| 2572232508 | t3m_00864 | COG0521        | Molybdopterin biosynthesis enzymes         |                                                   | 3.00E-33 |
| 2572232508 | t3m_00864 | pfam00994      | MoCF_biosynth                              |                                                   | 2.60E-27 |
| 2572232508 | t3m_00864 | TIGR00177      | molybdenum cofactor synthesis domain       |                                                   | 3.30E-32 |
| 2572232508 | t3m_00864 | KO:K03638      | molybdenum cofactor biosynthesis protein B |                                                   | 2.50E-33 |
| 2572232508 | t3m_00864 | Locus_type     |                                            | CDS                                               |          |
| 2572232508 | t3m_00864 | Product_name   |                                            | molybdenum cofactor synthesis domain              |          |
| 2572232508 | t3m_00864 | Scaffold       |                                            | t3m_contig_70_116_len_36300_read_count_2853038.15 |          |
| 2572232508 | t3m_00864 | Coordinates    |                                            | 30613..31140(-)                                   |          |
| 2572232508 | t3m_00864 | DNA_length     |                                            | 528bp                                             |          |
| 2572232508 | t3m_00864 | Protein_length |                                            | 175aa                                             |          |
| 2572232508 | t3m_00864 | GC             |                                            |                                                   | 0.67     |
| 2572232509 | t3m_00865 | COG_category   | [H] Coenzyme transport and metabolism      |                                                   |          |

|            |           |                |                                                                        |          |
|------------|-----------|----------------|------------------------------------------------------------------------|----------|
| 2572232509 | t3m_00865 | COG0315        | Molybdenum cofactor biosynthesis enzyme                                | 3.00E-37 |
| 2572232509 | t3m_00865 | pfam01967      | MoaC                                                                   | 3.10E-39 |
| 2572232509 | t3m_00865 | TIGR00581      | molybdenum cofactor biosynthesis protein MoaC                          | 9.80E-44 |
| 2572232509 | t3m_00865 | KO:K03637      | molybdenum cofactor biosynthesis protein C                             | 5.50E-34 |
| 2572232509 | t3m_00865 | ITERM:04711    | cyclic pyranopterin monophosphate synthase subunit MoaC (EC 4.1.99.18) |          |
| 2572232509 | t3m_00865 | Locus_type     | CDS                                                                    |          |
| 2572232509 | t3m_00865 | Product_name   | cyclic pyranopterin monophosphate synthase subunit MoaC (EC 4.1.99.1   |          |
| 2572232509 | t3m_00865 | Scaffold       | t3m_contig_70_116_len_36300_read_count_2853038.15                      |          |
| 2572232509 | t3m_00865 | Coordinates    | 31137..31586(-)                                                        |          |
| 2572232509 | t3m_00865 | DNA_length     | 450bp                                                                  |          |
| 2572232509 | t3m_00865 | Protein_length | 149aa                                                                  |          |
| 2572232509 | t3m_00865 | GC             |                                                                        | 0.68     |
|            |           |                |                                                                        |          |
| 2572232510 | t3m_00866 | pfam00004      | AAA                                                                    | 6.40E-15 |
| 2572232510 | t3m_00866 | pfam08542      | Rep_fac_C                                                              | 1.00E-15 |
| 2572232510 | t3m_00866 | KO:K04801      | replication factor C small subunit                                     | 0.00E+00 |
| 2572232510 | t3m_00866 | Locus_type     | CDS                                                                    |          |
| 2572232510 | t3m_00866 | Product_name   | replication factor C small subunit                                     |          |
| 2572232510 | t3m_00866 | Scaffold       | t3m_contig_70_116_len_36300_read_count_2853038.15                      |          |
| 2572232510 | t3m_00866 | Coordinates    | 31590..32573(-)                                                        |          |
| 2572232510 | t3m_00866 | DNA_length     | 984bp                                                                  |          |
| 2572232510 | t3m_00866 | Protein_length | 327aa                                                                  |          |
| 2572232510 | t3m_00866 | GC             |                                                                        | 0.68     |
|            |           |                |                                                                        |          |
| 2572232511 | t3m_00867 | Locus_type     | CDS                                                                    |          |
| 2572232511 | t3m_00867 | Product_name   | hypothetical protein                                                   |          |
| 2572232511 | t3m_00867 | Scaffold       | t3m_contig_70_116_len_36300_read_count_2853038.15                      |          |
| 2572232511 | t3m_00867 | Coordinates    | 32623..33069(-)                                                        |          |
| 2572232511 | t3m_00867 | DNA_length     | 447bp                                                                  |          |
| 2572232511 | t3m_00867 | Protein_length | 148aa                                                                  |          |
| 2572232511 | t3m_00867 | GC             |                                                                        | 0.67     |
|            |           |                |                                                                        |          |
| 2572232512 | t3m_00868 | Locus_type     | CDS                                                                    |          |
| 2572232512 | t3m_00868 | Product_name   | hypothetical protein                                                   |          |



|            |           |                |                                                                                  |          |
|------------|-----------|----------------|----------------------------------------------------------------------------------|----------|
| 2572232512 | t3m_00868 | Scaffold       | t3m_contig_70_116_len_36300_read_count_2853038.15                                |          |
| 2572232512 | t3m_00868 | Coordinates    | 33322..34359(-)                                                                  |          |
| 2572232512 | t3m_00868 | DNA_length     | 1038bp                                                                           |          |
| 2572232512 | t3m_00868 | Protein_length | 345aa                                                                            |          |
| 2572232512 | t3m_00868 | GC             |                                                                                  | 0.68     |
| 2572232512 | t3m_00868 | Transmembrane  | Yes                                                                              |          |
| 2572232513 | t3m_00869 | COG_category   | [O] Posttranslational modification, protein turnover, chaperones                 |          |
| 2572232513 | t3m_00869 | COG_category   | [U] Intracellular trafficking, secretion, and vesicular transport                |          |
| 2572232513 | t3m_00869 | COG0616        | Periplasmic serine proteases (ClpP class)                                        | 2.00E-46 |
| 2572232513 | t3m_00869 | pfam01343      | Peptidase_S49                                                                    | 1.40E-43 |
| 2572232513 | t3m_00869 | EC:3.4.21.-    | Hydrolases. Acting on peptide bonds (peptide hydrolases). Serine endopeptidases. |          |
| 2572232513 | t3m_00869 | TIGR00706      | signal peptide peptidase SppA, 36K type                                          | 3.60E-57 |
| 2572232513 | t3m_00869 | KO:K04773      | protease IV [EC:3.4.21.-]                                                        | 1.10E-31 |
| 2572232513 | t3m_00869 | Locus_type     | CDS                                                                              |          |
| 2572232513 | t3m_00869 | Product_name   | signal peptide peptidase SppA, 36K type                                          |          |
| 2572232513 | t3m_00869 | Scaffold       | t3m_contig_70_116_len_36300_read_count_2853038.15                                |          |
| 2572232513 | t3m_00869 | Coordinates    | 34452..35246(+)                                                                  |          |
| 2572232513 | t3m_00869 | DNA_length     | 795bp                                                                            |          |
| 2572232513 | t3m_00869 | Protein_length | 264aa                                                                            |          |
| 2572232513 | t3m_00869 | GC             |                                                                                  | 0.67     |
| 2572232514 | t3m_00870 | COG_category   | [U] Intracellular trafficking, secretion, and vesicular transport                |          |
| 2572232514 | t3m_00870 | COG4023        | Preprotein translocase subunit Sec61beta                                         | 1.00E-03 |
| 2572232514 | t3m_00870 | pfam03911      | Sec61_beta                                                                       | 5.20E-04 |
| 2572232514 | t3m_00870 | Locus_type     | CDS                                                                              |          |
| 2572232514 | t3m_00870 | Product_name   | Preprotein translocase subunit Sec61beta                                         |          |
| 2572232514 | t3m_00870 | Scaffold       | t3m_contig_70_116_len_36300_read_count_2853038.15                                |          |
| 2572232514 | t3m_00870 | Coordinates    | 35294..35455(+)                                                                  |          |
| 2572232514 | t3m_00870 | DNA_length     | 162bp                                                                            |          |
| 2572232514 | t3m_00870 | Protein_length | 53aa                                                                             |          |
| 2572232514 | t3m_00870 | GC             |                                                                                  | 0.62     |
| 2572232514 | t3m_00870 | Transmembrane  | Yes                                                                              |          |

|            |           |                |                                                                        |                                                                        |          |
|------------|-----------|----------------|------------------------------------------------------------------------|------------------------------------------------------------------------|----------|
| 2572232515 | t3m_00871 | COG_category   | [C] Energy production and conversion                                   |                                                                        |          |
| 2572232515 | t3m_00871 | COG0731        | Fe-S oxidoreductases                                                   |                                                                        | 2.00E-59 |
| 2572232515 | t3m_00871 | pfam08608      | Wyosine_form                                                           |                                                                        | 1.40E-17 |
| 2572232515 | t3m_00871 | pfam13394      | Fer4_14                                                                |                                                                        | 3.40E-06 |
| 2572232515 | t3m_00871 | pfam04055      | Radical_SAM                                                            |                                                                        | 2.60E-19 |
| 2572232515 | t3m_00871 | Locus_type     |                                                                        | CDS                                                                    |          |
| 2572232515 | t3m_00871 | Product_name   |                                                                        | Fe-S oxidoreductases                                                   |          |
| 2572232515 | t3m_00871 | Scaffold       |                                                                        | t3m_contig_70_116_len_36300_read_count_2853038.15                      |          |
| 2572232515 | t3m_00871 | Coordinates    |                                                                        | 35468..36289(-)                                                        |          |
| 2572232515 | t3m_00871 | DNA_length     |                                                                        | 822bp                                                                  |          |
| 2572232515 | t3m_00871 | Protein_length |                                                                        | 273aa                                                                  |          |
| 2572232515 | t3m_00871 | GC             |                                                                        |                                                                        | 0.67     |
| 2572232516 | t3m_00872 | pfam00528      | BPD_transp_1                                                           |                                                                        | 5.00E-17 |
| 2572232516 | t3m_00872 | Locus_type     |                                                                        | CDS                                                                    |          |
| 2572232516 | t3m_00872 | Product_name   |                                                                        | Binding-protein-dependent transport system inner membrane compone      |          |
| 2572232516 | t3m_00872 | Scaffold       |                                                                        | t3m_contig_70_133_len_34754_read_count_2944360.16                      |          |
| 2572232516 | t3m_00872 | Coordinates    |                                                                        | 3..581(+)                                                              |          |
| 2572232516 | t3m_00872 | DNA_length     |                                                                        | 579bp                                                                  |          |
| 2572232516 | t3m_00872 | Protein_length |                                                                        | 192aa                                                                  |          |
| 2572232516 | t3m_00872 | GC             |                                                                        |                                                                        | 0.64     |
| 2572232516 | t3m_00872 | Transmembrane  |                                                                        | Yes                                                                    |          |
| 2572232517 | t3m_00873 | pfam00005      | ABC_tran                                                               |                                                                        | 7.90E-16 |
| 2572232517 | t3m_00873 | pfam08352      | oligo_HPY                                                              |                                                                        | 8.60E-22 |
| 2572232517 | t3m_00873 | TIGR01727      | oligopeptide/dipeptide ABC transporter, ATP-binding protein, C-termini |                                                                        | 1.60E-33 |
| 2572232517 | t3m_00873 | Locus_type     |                                                                        | CDS                                                                    |          |
| 2572232517 | t3m_00873 | Product_name   |                                                                        | oligopeptide/dipeptide ABC transporter, ATP-binding protein, C-termina |          |
| 2572232517 | t3m_00873 | Scaffold       |                                                                        | t3m_contig_70_133_len_34754_read_count_2944360.16                      |          |
| 2572232517 | t3m_00873 | Coordinates    |                                                                        | 595..2229(+)                                                           |          |
| 2572232517 | t3m_00873 | DNA_length     |                                                                        | 1635bp                                                                 |          |
| 2572232517 | t3m_00873 | Protein_length |                                                                        | 544aa                                                                  |          |
| 2572232517 | t3m_00873 | GC             |                                                                        |                                                                        | 0.68     |

|            |           |                |                                                                                  |          |
|------------|-----------|----------------|----------------------------------------------------------------------------------|----------|
| 2572232518 | t3m_00874 | KEGG_module    | M00239: Peptides/nickel transport system                                         |          |
| 2572232518 | t3m_00874 | pfam08352      | oligo_HPY                                                                        | 5.70E-20 |
| 2572232518 | t3m_00874 | pfam00005      | ABC_tran                                                                         | 9.10E-27 |
| 2572232518 | t3m_00874 | TIGR01727      | oligopeptide/dipeptide ABC transporter, ATP-binding protein, C-termina           | 2.10E-30 |
| 2572232518 | t3m_00874 | KO:K02032      | peptide/nickel transport system ATP-binding protein                              | 0.00E+00 |
| 2572232518 | t3m_00874 | Locus_type     | CDS                                                                              |          |
| 2572232518 | t3m_00874 | Product_name   | oligopeptide/dipeptide ABC transporter, ATP-binding protein, C-termina           |          |
| 2572232518 | t3m_00874 | Scaffold       | t3m_contig_70_133_len_34754_read_count_2944360.16                                |          |
| 2572232518 | t3m_00874 | Coordinates    | 2234..3439(+)                                                                    |          |
| 2572232518 | t3m_00874 | DNA_length     | 1206bp                                                                           |          |
| 2572232518 | t3m_00874 | Protein_length | 401aa                                                                            |          |
| 2572232518 | t3m_00874 | GC             |                                                                                  | 0.68     |
|            |           |                |                                                                                  |          |
| 2572232519 | t3m_00875 | Locus_type     | CDS                                                                              |          |
| 2572232519 | t3m_00875 | Product_name   | hypothetical protein                                                             |          |
| 2572232519 | t3m_00875 | Scaffold       | t3m_contig_70_133_len_34754_read_count_2944360.16                                |          |
| 2572232519 | t3m_00875 | Coordinates    | 3478..3924(+)                                                                    |          |
| 2572232519 | t3m_00875 | DNA_length     | 447bp                                                                            |          |
| 2572232519 | t3m_00875 | Protein_length | 148aa                                                                            |          |
| 2572232519 | t3m_00875 | GC             |                                                                                  | 0.68     |
| 2572232519 | t3m_00875 | Transmembrane  | Yes                                                                              |          |
|            |           |                |                                                                                  |          |
| 2572232520 | t3m_00876 | Locus_type     | CDS                                                                              |          |
| 2572232520 | t3m_00876 | Product_name   | hypothetical protein                                                             |          |
| 2572232520 | t3m_00876 | Scaffold       | t3m_contig_70_133_len_34754_read_count_2944360.16                                |          |
| 2572232520 | t3m_00876 | Coordinates    | 4157..7207(-)                                                                    |          |
| 2572232520 | t3m_00876 | DNA_length     | 3051bp                                                                           |          |
| 2572232520 | t3m_00876 | Protein_length | 1016aa                                                                           |          |
| 2572232520 | t3m_00876 | GC             |                                                                                  | 0.64     |
| 2572232520 | t3m_00876 | Transmembrane  | Yes                                                                              |          |
|            |           |                |                                                                                  |          |
| 2572232521 | t3m_00877 | KEGG_module    | M00004: Pentose phosphate pathway (Pentose phosphate cycle)                      |          |
| 2572232521 | t3m_00877 | KEGG_module    | M00007: Pentose phosphate pathway, non-oxidative phase, fructose 6P => ribose 5P |          |
| 2572232521 | t3m_00877 | Metacyc        | PWY-1861: formaldehyde assimilation II (RuMP Cycle)                              |          |

|            |           |                |                                                                  |          |
|------------|-----------|----------------|------------------------------------------------------------------|----------|
| 2572232521 | t3m_00877 | Metacyc        | PWY-5723: Rubisco shunt                                          |          |
| 2572232521 | t3m_00877 | Metacyc        | NONOXIPENT-PWY: pentose phosphate pathway (non-oxidative branch) |          |
| 2572232521 | t3m_00877 | Metacyc        | CALVIN-PWY: Calvin-Benson-Bassham cycle                          |          |
| 2572232521 | t3m_00877 | Metacyc        | P124-PWY: Bifidobacterium shunt                                  |          |
| 2572232521 | t3m_00877 | Metacyc        | P185-PWY: formaldehyde assimilation III (dihydroxyacetone cycle) |          |
| 2572232521 | t3m_00877 | Metacyc        | P122-PWY: heterolactic fermentation                              |          |
| 2572232521 | t3m_00877 | Metacyc        | P21-PWY: pentose phosphate pathway (partial)                     |          |
| 2572232521 | t3m_00877 | Metacyc        | RIBITOLUTIL-PWY: ribitol degradation                             |          |
| 2572232521 | t3m_00877 | Metacyc        | DARABCAT-PWY: D-arabinose degradation II                         |          |
| 2572232521 | t3m_00877 | COG_category   | [G] Carbohydrate transport and metabolism                        |          |
| 2572232521 | t3m_00877 | COG0036        | Pentose-5-phosphate-3-epimerase                                  | 1.00E-69 |
| 2572232521 | t3m_00877 | pfam00834      | Ribul_P_3_epim                                                   | 2.10E-69 |
| 2572232521 | t3m_00877 | EC:5.1.3.1     | Ribulose-phosphate 3-epimerase.                                  |          |
| 2572232521 | t3m_00877 | TIGR01163      | ribulose-phosphate 3-epimerase                                   | 1.50E-77 |
| 2572232521 | t3m_00877 | KO:K01783      | ribulose-phosphate 3-epimerase [EC:5.1.3.1]                      | 0.00E+00 |
| 2572232521 | t3m_00877 | Locus_type     | CDS                                                              |          |
| 2572232521 | t3m_00877 | Product_name   | ribulose-phosphate 3-epimerase                                   |          |
| 2572232521 | t3m_00877 | Scaffold       | t3m_contig_70_133_len_34754_read_count_2944360.16                |          |
| 2572232521 | t3m_00877 | Coordinates    | 7332..8039(+)                                                    |          |
| 2572232521 | t3m_00877 | DNA_length     | 708bp                                                            |          |
| 2572232521 | t3m_00877 | Protein_length | 235aa                                                            |          |
| 2572232521 | t3m_00877 | GC             |                                                                  | 0.69     |
| 2572232522 | t3m_00878 | COG_category   | [L] Replication, recombination and repair                        |          |
| 2572232522 | t3m_00878 | COG1793        | ATP-dependent DNA ligase                                         | 7.00E-85 |
| 2572232522 | t3m_00878 | pfam04679      | DNA_ligase_A_C                                                   | 7.40E-25 |
| 2572232522 | t3m_00878 | pfam04675      | DNA_ligase_A_N                                                   | 1.70E-48 |
| 2572232522 | t3m_00878 | pfam01068      | DNA_ligase_A_M                                                   | 5.50E-47 |
| 2572232522 | t3m_00878 | EC:6.5.1.1     | DNA ligase (ATP).                                                |          |
| 2572232522 | t3m_00878 | TIGR00574      | DNA ligase I, ATP-dependent (dnl1)                               | 0.00E+00 |
| 2572232522 | t3m_00878 | KO:K10747      | DNA ligase 1 [EC:6.5.1.1]                                        | 0.00E+00 |
| 2572232522 | t3m_00878 | Locus_type     | CDS                                                              |          |
| 2572232522 | t3m_00878 | Product_name   | DNA ligase I, ATP-dependent (dnl1)                               |          |
| 2572232522 | t3m_00878 | Scaffold       | t3m_contig_70_133_len_34754_read_count_2944360.16                |          |

|            |           |                |                                                     |          |
|------------|-----------|----------------|-----------------------------------------------------|----------|
| 2572232522 | t3m_00878 | Coordinates    | 8026..9813(+)                                       |          |
| 2572232522 | t3m_00878 | DNA_length     | 1788bp                                              |          |
| 2572232522 | t3m_00878 | Protein_length | 595aa                                               |          |
| 2572232522 | t3m_00878 | GC             |                                                     | 0.69     |
| 2572232523 | t3m_00879 | COG_category   | [S] Function unknown                                |          |
| 2572232523 | t3m_00879 | COG1873        | Uncharacterized conserved protein                   | 5.00E-10 |
| 2572232523 | t3m_00879 | pfam05239      | PRC                                                 | 1.70E-09 |
| 2572232523 | t3m_00879 | Locus_type     | CDS                                                 |          |
| 2572232523 | t3m_00879 | Product_name   | Uncharacterized conserved protein                   |          |
| 2572232523 | t3m_00879 | Scaffold       | t3m_contig_70_133_len_34754_read_count_2944360.16   |          |
| 2572232523 | t3m_00879 | Coordinates    | 9914..10213(+)                                      |          |
| 2572232523 | t3m_00879 | DNA_length     | 300bp                                               |          |
| 2572232523 | t3m_00879 | Protein_length | 99aa                                                |          |
| 2572232523 | t3m_00879 | GC             |                                                     | 0.63     |
| 2572232524 | t3m_00880 | Locus_type     | tRNA                                                |          |
| 2572232524 | t3m_00880 | Product_name   | tRNA_Leu_TAA                                        |          |
| 2572232524 | t3m_00880 | Scaffold       | t3m_contig_70_133_len_34754_read_count_2944360.16   |          |
| 2572232524 | t3m_00880 | Coordinates    | 10218..10322(+)                                     |          |
| 2572232524 | t3m_00880 | DNA_length     | 87bp                                                |          |
| 2572232524 | t3m_00880 | GC             |                                                     | 0.67     |
| 2572232525 | t3m_00881 | COG_category   | [J] Translation, ribosomal structure and biogenesis |          |
| 2572232525 | t3m_00881 | COG2263        | Predicted RNA methylase                             | 6.00E-42 |
| 2572232525 | t3m_00881 | pfam13659      | Methyltransf_26                                     | 7.10E-16 |
| 2572232525 | t3m_00881 | KO:K07579      | putative methylase                                  | 1.10E-29 |
| 2572232525 | t3m_00881 | Locus_type     | CDS                                                 |          |
| 2572232525 | t3m_00881 | Product_name   | Predicted RNA methylase                             |          |
| 2572232525 | t3m_00881 | Scaffold       | t3m_contig_70_133_len_34754_read_count_2944360.16   |          |
| 2572232525 | t3m_00881 | Coordinates    | 10380..10991(+)                                     |          |
| 2572232525 | t3m_00881 | DNA_length     | 612bp                                               |          |
| 2572232525 | t3m_00881 | Protein_length | 203aa                                               |          |
| 2572232525 | t3m_00881 | GC             |                                                     | 0.71     |

|            |           |                |                                                                        |          |
|------------|-----------|----------------|------------------------------------------------------------------------|----------|
| 2572232526 | t3m_00882 | KEGG_module    | M00390: Exosome, archaea                                               |          |
| 2572232526 | t3m_00882 | KEGG_module    | M00391: Exosome, eukaryotes                                            |          |
| 2572232526 | t3m_00882 | COG_category   | [J] Translation, ribosomal structure and biogenesis                    |          |
| 2572232526 | t3m_00882 | COG1096        | Predicted RNA-binding protein (consists of S1 domain and a Zn-ribbon d | 5.00E-38 |
| 2572232526 | t3m_00882 | pfam14382      | ECR1_N                                                                 | 3.70E-15 |
| 2572232526 | t3m_00882 | KO:K07573      | exosome complex component CSL4                                         | 5.60E-34 |
| 2572232526 | t3m_00882 | Locus_type     | CDS                                                                    |          |
| 2572232526 | t3m_00882 | Product_name   | Predicted RNA-binding protein (consists of S1 domain and a Zn-ribbon d |          |
| 2572232526 | t3m_00882 | Scaffold       | t3m_contig_70_133_len_34754_read_count_2944360.16                      |          |
| 2572232526 | t3m_00882 | Coordinates    | 10988..11584(+)                                                        |          |
| 2572232526 | t3m_00882 | DNA_length     | 597bp                                                                  |          |
| 2572232526 | t3m_00882 | Protein_length | 198aa                                                                  |          |
| 2572232526 | t3m_00882 | GC             |                                                                        | 0.7      |
| 2572232527 | t3m_00883 | KEGG_module    | M00346: Formaldehyde assimilation, serine pathway                      |          |
| 2572232527 | t3m_00883 | KEGG_module    | M00141: C1-unit interconversion, eukaryotes                            |          |
| 2572232527 | t3m_00883 | KEGG_module    | M00140: C1-unit interconversion, prokaryotes                           |          |
| 2572232527 | t3m_00883 | KEGG_module    | M00532: Photorespiration                                               |          |
| 2572232527 | t3m_00883 | Metacyc        | 1CMET2-PWY: formylTHF biosynthesis I                                   |          |
| 2572232527 | t3m_00883 | Metacyc        | GLYSYN-PWY: glycine biosynthesis I                                     |          |
| 2572232527 | t3m_00883 | Metacyc        | PWY-3841: folate transformations II                                    |          |
| 2572232527 | t3m_00883 | Metacyc        | PWY-2201: folate transformations I                                     |          |
| 2572232527 | t3m_00883 | Metacyc        | PWY-2161: folate polyglutamylatation                                   |          |
| 2572232527 | t3m_00883 | Metacyc        | PWY-5497: purine nucleobases degradatation II (anaerobic)              |          |
| 2572232527 | t3m_00883 | Metacyc        | PWY-181: photorespiration                                              |          |
| 2572232527 | t3m_00883 | Metacyc        | PWY-1622: formaldehyde assimilation I (serine pathway)                 |          |
| 2572232527 | t3m_00883 | Metacyc        | PWY-3661: glycine betaine degradatation                                |          |
| 2572232527 | t3m_00883 | COG_category   | [E] Amino acid transport and metabolism                                |          |
| 2572232527 | t3m_00883 | COG0112        | Glycine/serine hydroxymethyltransferase                                | 3.00E-70 |
| 2572232527 | t3m_00883 | pfam00464      | SHMT                                                                   | 6.10E-24 |
| 2572232527 | t3m_00883 | EC:2.1.2.1     | Glycine hydroxymethyltransferase.                                      |          |
| 2572232527 | t3m_00883 | KO:K00600      | glycine hydroxymethyltransferase [EC:2.1.2.1]                          | 0.00E+00 |
| 2572232527 | t3m_00883 | Locus_type     | CDS                                                                    |          |

|            |           |                |                                                              |          |
|------------|-----------|----------------|--------------------------------------------------------------|----------|
| 2572232527 | t3m_00883 | Product_name   | Glycine/serine hydroxymethyltransferase                      |          |
| 2572232527 | t3m_00883 | Scaffold       | t3m_contig_70_133_len_34754_read_count_2944360.16            |          |
| 2572232527 | t3m_00883 | Coordinates    | 11574..12797(+)                                              |          |
| 2572232527 | t3m_00883 | DNA_length     | 1224bp                                                       |          |
| 2572232527 | t3m_00883 | Protein_length | 407aa                                                        |          |
| 2572232527 | t3m_00883 | GC             |                                                              | 0.71     |
|            |           |                |                                                              |          |
| 2572232528 | t3m_00884 | Locus_type     | CDS                                                          |          |
| 2572232528 | t3m_00884 | Product_name   | hypothetical protein                                         |          |
| 2572232528 | t3m_00884 | Scaffold       | t3m_contig_70_133_len_34754_read_count_2944360.16            |          |
| 2572232528 | t3m_00884 | Coordinates    | 12934..15363(-)                                              |          |
| 2572232528 | t3m_00884 | DNA_length     | 2430bp                                                       |          |
| 2572232528 | t3m_00884 | Protein_length | 809aa                                                        |          |
| 2572232528 | t3m_00884 | GC             |                                                              | 0.64     |
| 2572232528 | t3m_00884 | Transmembrane  | Yes                                                          |          |
|            |           |                |                                                              |          |
| 2572232529 | t3m_00885 | Locus_type     | CDS                                                          |          |
| 2572232529 | t3m_00885 | Product_name   | hypothetical protein                                         |          |
| 2572232529 | t3m_00885 | Scaffold       | t3m_contig_70_133_len_34754_read_count_2944360.16            |          |
| 2572232529 | t3m_00885 | Coordinates    | 15796..15924(+)                                              |          |
| 2572232529 | t3m_00885 | DNA_length     | 129bp                                                        |          |
| 2572232529 | t3m_00885 | Protein_length | 42aa                                                         |          |
| 2572232529 | t3m_00885 | GC             |                                                              | 0.68     |
|            |           |                |                                                              |          |
| 2572232530 | t3m_00886 | COG_category   | [F] Nucleotide transport and metabolism                      |          |
| 2572232530 | t3m_00886 | COG1936        | Predicted nucleotide kinase (related to CMP and AMP kinases) | 2.00E-27 |
| 2572232530 | t3m_00886 | pfam13238      | AAA_18                                                       | 1.60E-10 |
| 2572232530 | t3m_00886 | Locus_type     | CDS                                                          |          |
| 2572232530 | t3m_00886 | Product_name   | Predicted nucleotide kinase (related to CMP and AMP kinases) |          |
| 2572232530 | t3m_00886 | Scaffold       | t3m_contig_70_133_len_34754_read_count_2944360.16            |          |
| 2572232530 | t3m_00886 | Coordinates    | 15986..16516(+)                                              |          |
| 2572232530 | t3m_00886 | DNA_length     | 531bp                                                        |          |
| 2572232530 | t3m_00886 | Protein_length | 176aa                                                        |          |
| 2572232530 | t3m_00886 | GC             |                                                              | 0.67     |

|            |           |                |                                                                                    |          |
|------------|-----------|----------------|------------------------------------------------------------------------------------|----------|
| 2572232531 | t3m_00887 | Metacyc        | PWY4FS-7: phosphatidylglycerol biosynthesis I (plastidic)                          |          |
| 2572232531 | t3m_00887 | Metacyc        | PWY-5269: cardiolipin biosynthesis II                                              |          |
| 2572232531 | t3m_00887 | Metacyc        | PWY4FS-8: phosphatidylglycerol biosynthesis II (non-plastidic)                     |          |
| 2572232531 | t3m_00887 | Metacyc        | PWY0-1545: cardiolipin biosynthesis III                                            |          |
| 2572232531 | t3m_00887 | Metacyc        | PWY-5668: cardiolipin biosynthesis I                                               |          |
| 2572232531 | t3m_00887 | COG_category   | [I] Lipid transport and metabolism                                                 |          |
| 2572232531 | t3m_00887 | COG0558        | Phosphatidylglycerophosphate synthase                                              | 9.00E-10 |
| 2572232531 | t3m_00887 | pfam01066      | CDP-OH_P_transf                                                                    | 3.40E-11 |
| 2572232531 | t3m_00887 | EC:2.7.8.5     | CDP-diacylglycerol--glycerol-3-phosphate 3-phosphatidyltransferase.                |          |
| 2572232531 | t3m_00887 | KO:K00995      | CDP-diacylglycerol--glycerol-3-phosphate 3-phosphatidyltransferase [EC             | 1.00E-39 |
| 2572232531 | t3m_00887 | Locus_type     | CDS                                                                                |          |
| 2572232531 | t3m_00887 | Product_name   | Phosphatidylglycerophosphate synthase                                              |          |
| 2572232531 | t3m_00887 | Scaffold       | t3m_contig_70_133_len_34754_read_count_2944360.16                                  |          |
| 2572232531 | t3m_00887 | Coordinates    | 16537..17199(+)                                                                    |          |
| 2572232531 | t3m_00887 | DNA_length     | 663bp                                                                              |          |
| 2572232531 | t3m_00887 | Protein_length | 220aa                                                                              |          |
| 2572232531 | t3m_00887 | GC             |                                                                                    | 0.69     |
| 2572232531 | t3m_00887 | Transmembrane  | Yes                                                                                |          |
| 2572232532 | t3m_00888 | KEGG_module    | M00261: DNA polymerase alpha / primase complex                                     |          |
| 2572232532 | t3m_00888 | Metacyc        | PWY-6626: CDP-2-glycerol biosynthesis                                              |          |
| 2572232532 | t3m_00888 | Metacyc        | PWY4FS-4: phosphatidylcholine biosynthesis IV                                      |          |
| 2572232532 | t3m_00888 | Metacyc        | PWY-7127: CDP-D-mannitol biosynthesis                                              |          |
| 2572232532 | t3m_00888 | Metacyc        | PWY-6679: jadomycin biosynthesis                                                   |          |
| 2572232532 | t3m_00888 | Metacyc        | PWY-6998: CDP-D-arabitol biosynthesis                                              |          |
| 2572232532 | t3m_00888 | Metacyc        | PWY-6749: CMP-legionaminate biosynthesis I                                         |          |
| 2572232532 | t3m_00888 | COG_category   | [L] Replication, recombination and repair                                          |          |
| 2572232532 | t3m_00888 | COG2219        | Eukaryotic-type DNA primase, large subunit                                         | 1.00E-35 |
| 2572232532 | t3m_00888 | pfam04104      | DNA_primase_lrg                                                                    | 7.90E-26 |
| 2572232532 | t3m_00888 | EC:2.7.7.-     | Transferases. Transferring phosphorous-containing groups. Nucleotidyltransferases. |          |
| 2572232532 | t3m_00888 | KO:K02685      | DNA primase large subunit [EC:2.7.7.-]                                             | 2.70E-43 |
| 2572232532 | t3m_00888 | ITERM:00097    | DNA primase large subunit (EC 2.7.7.-)                                             |          |
| 2572232532 | t3m_00888 | Locus_type     | CDS                                                                                |          |



|            |           |                |                                                        |          |
|------------|-----------|----------------|--------------------------------------------------------|----------|
| 2572232532 | t3m_00888 | Product_name   | DNA primase large subunit (EC 2.7.7.-)                 |          |
| 2572232532 | t3m_00888 | Scaffold       | t3m_contig_70_133_len_34754_read_count_2944360.16      |          |
| 2572232532 | t3m_00888 | Coordinates    | 17129..18316(-)                                        |          |
| 2572232532 | t3m_00888 | DNA_length     | 1188bp                                                 |          |
| 2572232532 | t3m_00888 | Protein_length | 395aa                                                  |          |
| 2572232532 | t3m_00888 | GC             |                                                        | 0.73     |
|            |           |                |                                                        |          |
| 2572232533 | t3m_00889 | COG_category   | [M] Cell wall/membrane/envelope biogenesis             |          |
| 2572232533 | t3m_00889 | COG0750        | Predicted membrane-associated Zn-dependent proteases 1 | 1.00E-11 |
| 2572232533 | t3m_00889 | pfam02163      | Peptidase_M50                                          | 9.30E-27 |
| 2572232533 | t3m_00889 | pfam13180      | PDZ_2                                                  | 6.50E-11 |
| 2572232533 | t3m_00889 | Locus_type     | CDS                                                    |          |
| 2572232533 | t3m_00889 | Product_name   | Predicted membrane-associated Zn-dependent proteases 1 |          |
| 2572232533 | t3m_00889 | Scaffold       | t3m_contig_70_133_len_34754_read_count_2944360.16      |          |
| 2572232533 | t3m_00889 | Coordinates    | 18286..19623(-)                                        |          |
| 2572232533 | t3m_00889 | DNA_length     | 1338bp                                                 |          |
| 2572232533 | t3m_00889 | Protein_length | 445aa                                                  |          |
| 2572232533 | t3m_00889 | GC             |                                                        | 0.67     |
| 2572232533 | t3m_00889 | Transmembrane  | Yes                                                    |          |
|            |           |                |                                                        |          |
| 2572232534 | t3m_00890 | pfam00801      | PKD                                                    | 3.40E-13 |
| 2572232534 | t3m_00890 | pfam09286      | Pro-kuma_activ                                         | 8.00E-16 |
| 2572232534 | t3m_00890 | pfam00801      | PKD                                                    | 2.00E-07 |
| 2572232534 | t3m_00890 | pfam00801      | PKD                                                    | 7.20E-06 |
| 2572232534 | t3m_00890 | Locus_type     | CDS                                                    |          |
| 2572232534 | t3m_00890 | Product_name   | PKD domain/Pro-kumamolisin, activation domain          |          |
| 2572232534 | t3m_00890 | Scaffold       | t3m_contig_70_133_len_34754_read_count_2944360.16      |          |
| 2572232534 | t3m_00890 | Coordinates    | 19728..23612(+)                                        |          |
| 2572232534 | t3m_00890 | DNA_length     | 3885bp                                                 |          |
| 2572232534 | t3m_00890 | Protein_length | 1294aa                                                 |          |
| 2572232534 | t3m_00890 | GC             |                                                        | 0.7      |
| 2572232534 | t3m_00890 | Transmembrane  | Yes                                                    |          |
|            |           |                |                                                        |          |
| 2572232535 | t3m_00891 | COG_category   | [S] Function unknown                                   |          |

|            |           |                |                                                   |          |
|------------|-----------|----------------|---------------------------------------------------|----------|
| 2572232535 | t3m_00891 | COG1690        | Uncharacterized conserved protein                 | 0.00E+00 |
| 2572232535 | t3m_00891 | pfam01139      | RtcB                                              | 0.00E+00 |
| 2572232535 | t3m_00891 | EC:6.5.1.3     | RNA ligase (ATP).                                 |          |
| 2572232535 | t3m_00891 | KO:K14415      | tRNA-splicing ligase RtcB [EC:6.5.1.3]            | 0.00E+00 |
| 2572232535 | t3m_00891 | Locus_type     | CDS                                               |          |
| 2572232535 | t3m_00891 | Product_name   | Uncharacterized conserved protein                 |          |
| 2572232535 | t3m_00891 | Scaffold       | t3m_contig_70_133_len_34754_read_count_2944360.16 |          |
| 2572232535 | t3m_00891 | Coordinates    | 23602..25053(-)                                   |          |
| 2572232535 | t3m_00891 | DNA_length     | 1452bp                                            |          |
| 2572232535 | t3m_00891 | Protein_length | 483aa                                             |          |
| 2572232535 | t3m_00891 | GC             |                                                   | 0.71     |
|            |           |                |                                                   |          |
| 2572232536 | t3m_00892 | Locus_type     | CDS                                               |          |
| 2572232536 | t3m_00892 | Product_name   | hypothetical protein                              |          |
| 2572232536 | t3m_00892 | Scaffold       | t3m_contig_70_133_len_34754_read_count_2944360.16 |          |
| 2572232536 | t3m_00892 | Coordinates    | 25174..25521(+)                                   |          |
| 2572232536 | t3m_00892 | DNA_length     | 348bp                                             |          |
| 2572232536 | t3m_00892 | Protein_length | 115aa                                             |          |
| 2572232536 | t3m_00892 | GC             |                                                   | 0.67     |
| 2572232536 | t3m_00892 | Transmembrane  | Yes                                               |          |
|            |           |                |                                                   |          |
| 2572232537 | t3m_00893 | Locus_type     | CDS                                               |          |
| 2572232537 | t3m_00893 | Product_name   | hypothetical protein                              |          |
| 2572232537 | t3m_00893 | Scaffold       | t3m_contig_70_133_len_34754_read_count_2944360.16 |          |
| 2572232537 | t3m_00893 | Coordinates    | 25525..25905(+)                                   |          |
| 2572232537 | t3m_00893 | DNA_length     | 381bp                                             |          |
| 2572232537 | t3m_00893 | Protein_length | 126aa                                             |          |
| 2572232537 | t3m_00893 | GC             |                                                   | 0.68     |
| 2572232537 | t3m_00893 | Transmembrane  | Yes                                               |          |
|            |           |                |                                                   |          |
| 2572232538 | t3m_00894 | pfam00364      | Biotin_lipoyl                                     | 2.20E-15 |
| 2572232538 | t3m_00894 | Locus_type     | CDS                                               |          |
| 2572232538 | t3m_00894 | Product_name   | Biotin-requiring enzyme                           |          |
| 2572232538 | t3m_00894 | Scaffold       | t3m_contig_70_133_len_34754_read_count_2944360.16 |          |

|            |           |                |                                                                               |          |
|------------|-----------|----------------|-------------------------------------------------------------------------------|----------|
| 2572232538 | t3m_00894 | Coordinates    | 25910..26482(-)                                                               |          |
| 2572232538 | t3m_00894 | DNA_length     | 573bp                                                                         |          |
| 2572232538 | t3m_00894 | Protein_length | 190aa                                                                         |          |
| 2572232538 | t3m_00894 | GC             |                                                                               | 0.69     |
| 2572232539 | t3m_00895 | KEGG_module    | M00173: Reductive citric acid cycle (Arnon-Buchanan cycle)                    |          |
| 2572232539 | t3m_00895 | Metacyc        | P42-PWY: incomplete reductive TCA cycle                                       |          |
| 2572232539 | t3m_00895 | Metacyc        | PWY-5750: itaconate biosynthesis                                              |          |
| 2572232539 | t3m_00895 | Metacyc        | PWY-6142: gluconeogenesis II (<i>Methanobacterium thermoautotrophicum</i>)    |          |
| 2572232539 | t3m_00895 | Metacyc        | PWY-6146: <i>Methanobacterium thermoautotrophicum</i> biosynthetic metabolism |          |
| 2572232539 | t3m_00895 | COG_category   | [C] Energy production and conversion                                          |          |
| 2572232539 | t3m_00895 | COG5016        | Pyruvate/oxaloacetate carboxyltransferase                                     | 0.00E+00 |
| 2572232539 | t3m_00895 | pfam00682      | HMGL-like                                                                     | 2.20E-36 |
| 2572232539 | t3m_00895 | pfam02436      | PYC_OADA                                                                      | 4.40E-57 |
| 2572232539 | t3m_00895 | EC:6.4.1.1     | Pyruvate carboxylase.                                                         |          |
| 2572232539 | t3m_00895 | KO:K01960      | pyruvate carboxylase subunit B [EC:6.4.1.1]                                   | 0.00E+00 |
| 2572232539 | t3m_00895 | Locus_type     | CDS                                                                           |          |
| 2572232539 | t3m_00895 | Product_name   | pyruvate carboxylase subunit B (EC 6.4.1.1)                                   |          |
| 2572232539 | t3m_00895 | Scaffold       | t3m_contig_70_133_len_34754_read_count_2944360.16                             |          |
| 2572232539 | t3m_00895 | Coordinates    | 26454..27986(-)                                                               |          |
| 2572232539 | t3m_00895 | DNA_length     | 1533bp                                                                        |          |
| 2572232539 | t3m_00895 | Protein_length | 510aa                                                                         |          |
| 2572232539 | t3m_00895 | GC             |                                                                               | 0.71     |
| 2572232540 | t3m_00896 | COG_category   | [I] Lipid transport and metabolism                                            |          |
| 2572232540 | t3m_00896 | COG4799        | Acetyl-CoA carboxylase, carboxyltransferase component (subunits alpha;        | 0.00E+00 |
| 2572232540 | t3m_00896 | pfam01039      | Carboxyl_trans                                                                | 0.00E+00 |
| 2572232540 | t3m_00896 | Locus_type     | CDS                                                                           |          |
| 2572232540 | t3m_00896 | Product_name   | Acetyl-CoA carboxylase, carboxyltransferase component (subunits alpha         |          |
| 2572232540 | t3m_00896 | Scaffold       | t3m_contig_70_133_len_34754_read_count_2944360.16                             |          |
| 2572232540 | t3m_00896 | Coordinates    | 28004..29554(-)                                                               |          |
| 2572232540 | t3m_00896 | DNA_length     | 1551bp                                                                        |          |
| 2572232540 | t3m_00896 | Protein_length | 516aa                                                                         |          |
| 2572232540 | t3m_00896 | GC             |                                                                               | 0.71     |

|            |           |                |                                                                            |          |
|------------|-----------|----------------|----------------------------------------------------------------------------|----------|
| 2572232541 | t3m_00897 | Metacyc        | PWY0-1264: biotin-carboxyl carrier protein assembly                        |          |
| 2572232541 | t3m_00897 | COG_category   | [H] Coenzyme transport and metabolism                                      |          |
| 2572232541 | t3m_00897 | COG0340        | Biotin-(acetyl-CoA carboxylase) ligase                                     | 3.00E-33 |
| 2572232541 | t3m_00897 | pfam03099      | BPL_LplA_LipB                                                              | 3.60E-16 |
| 2572232541 | t3m_00897 | EC:6.3.4.15    | Biotin--[acetyl-CoA-carboxylase] ligase.                                   |          |
| 2572232541 | t3m_00897 | TIGR00121      | birA, biotin-[acetyl-CoA-carboxylase] ligase region                        | 3.00E-37 |
| 2572232541 | t3m_00897 | KO:K03524      | BirA family transcriptional regulator, biotin operon repressor / biotin-[a | 5.50E-30 |
| 2572232541 | t3m_00897 | Locus_type     | CDS                                                                        |          |
| 2572232541 | t3m_00897 | Product_name   | birA, biotin-[acetyl-CoA-carboxylase] ligase region                        |          |
| 2572232541 | t3m_00897 | Scaffold       | t3m_contig_70_133_len_34754_read_count_2944360.16                          |          |
| 2572232541 | t3m_00897 | Coordinates    | 29551..30291(-)                                                            |          |
| 2572232541 | t3m_00897 | DNA_length     | 741bp                                                                      |          |
| 2572232541 | t3m_00897 | Protein_length | 246aa                                                                      |          |
| 2572232541 | t3m_00897 | GC             |                                                                            | 0.73     |
| 2572232542 | t3m_00898 | Locus_type     | CDS                                                                        |          |
| 2572232542 | t3m_00898 | Product_name   | hypothetical protein                                                       |          |
| 2572232542 | t3m_00898 | Scaffold       | t3m_contig_70_133_len_34754_read_count_2944360.16                          |          |
| 2572232542 | t3m_00898 | Coordinates    | 30445..30801(+)                                                            |          |
| 2572232542 | t3m_00898 | DNA_length     | 357bp                                                                      |          |
| 2572232542 | t3m_00898 | Protein_length | 118aa                                                                      |          |
| 2572232542 | t3m_00898 | GC             |                                                                            | 0.69     |
| 2572232543 | t3m_00899 | KEGG_module    | M00125: Riboflavin biosynthesis, GTP => riboflavin/FMN/FAD                 |          |
| 2572232543 | t3m_00899 | Metacyc        | PWY-6168: flavin biosynthesis III (fungi)                                  |          |
| 2572232543 | t3m_00899 | Metacyc        | PWY-6167: flavin biosynthesis II (archaea)                                 |          |
| 2572232543 | t3m_00899 | Metacyc        | RIBOSYN2-PWY: flavin biosynthesis I (bacteria and plants)                  |          |
| 2572232543 | t3m_00899 | IMG_pathway    | 293: riboflavin biosynthesis                                               |          |
| 2572232543 | t3m_00899 | COG_category   | [H] Coenzyme transport and metabolism                                      |          |
| 2572232543 | t3m_00899 | COG0054        | Riboflavin synthase beta-chain                                             | 3.00E-29 |
| 2572232543 | t3m_00899 | pfam00885      | DMRL_synthase                                                              | 4.70E-35 |
| 2572232543 | t3m_00899 | EC:2.5.1.78    | 6,7-dimethyl-8-ribityllumazine synthase.                                   |          |
| 2572232543 | t3m_00899 | TIGR00114      | 6,7-dimethyl-8-ribityllumazine synthase                                    | 2.00E-41 |

|            |           |                |                                                            |          |
|------------|-----------|----------------|------------------------------------------------------------|----------|
| 2572232543 | t3m_00899 | KO:K00794      | 6,7-dimethyl-8-ribityllumazine synthase [EC:2.5.1.78]      | 3.40E-44 |
| 2572232543 | t3m_00899 | ITERM:00568    | 6,7-dimethyl-8-ribityllumazine synthase (EC 2.5.1.78)      |          |
| 2572232543 | t3m_00899 | Locus_type     | CDS                                                        |          |
| 2572232543 | t3m_00899 | Product_name   | 6,7-dimethyl-8-ribityllumazine synthase (EC 2.5.1.78)      |          |
| 2572232543 | t3m_00899 | Scaffold       | t3m_contig_70_133_len_34754_read_count_2944360.16          |          |
| 2572232543 | t3m_00899 | Coordinates    | 30820..31260(-)                                            |          |
| 2572232543 | t3m_00899 | DNA_length     | 441bp                                                      |          |
| 2572232543 | t3m_00899 | Protein_length | 146aa                                                      |          |
| 2572232543 | t3m_00899 | GC             |                                                            | 0.68     |
| 2572232544 | t3m_00900 | KEGG_module    | M00125: Riboflavin biosynthesis, GTP => riboflavin/FMN/FAD |          |
| 2572232544 | t3m_00900 | Metacyc        | PWY-6167: flavin biosynthesis II (archaea)                 |          |
| 2572232544 | t3m_00900 | Metacyc        | RIBOSYN2-PWY: flavin biosynthesis I (bacteria and plants)  |          |
| 2572232544 | t3m_00900 | Metacyc        | PWY-6168: flavin biosynthesis III (fungi)                  |          |
| 2572232544 | t3m_00900 | IMG_pathway    | 293: riboflavin biosynthesis                               |          |
| 2572232544 | t3m_00900 | COG_category   | [H] Coenzyme transport and metabolism                      |          |
| 2572232544 | t3m_00900 | COG1731        | Archaeal riboflavin synthase                               | 1.00E-45 |
| 2572232544 | t3m_00900 | pfam00885      | DMRL_synthase                                              | 2.10E-10 |
| 2572232544 | t3m_00900 | EC:2.5.1.9     | Riboflavin synthase.                                       |          |
| 2572232544 | t3m_00900 | TIGR01506      | riboflavin synthase                                        | 3.00E-53 |
| 2572232544 | t3m_00900 | KO:K00793      | riboflavin synthase [EC:2.5.1.9]                           | 0.00E+00 |
| 2572232544 | t3m_00900 | ITERM:01278    | riboflavin synthase alpha chain (EC 2.5.1.9)               |          |
| 2572232544 | t3m_00900 | Locus_type     | CDS                                                        |          |
| 2572232544 | t3m_00900 | Product_name   | riboflavin synthase alpha chain (EC 2.5.1.9)               |          |
| 2572232544 | t3m_00900 | Scaffold       | t3m_contig_70_133_len_34754_read_count_2944360.16          |          |
| 2572232544 | t3m_00900 | Coordinates    | 31305..31775(-)                                            |          |
| 2572232544 | t3m_00900 | DNA_length     | 471bp                                                      |          |
| 2572232544 | t3m_00900 | Protein_length | 156aa                                                      |          |
| 2572232544 | t3m_00900 | GC             |                                                            | 0.72     |
| 2572232545 | t3m_00901 | COG_category   | [I] Lipid transport and metabolism                         |          |
| 2572232545 | t3m_00901 | COG_category   | [M] Cell wall/membrane/envelope biogenesis                 |          |
| 2572232545 | t3m_00901 | COG0615        | Cytidylyltransferase                                       | 2.00E-28 |
| 2572232545 | t3m_00901 | pfam01467      | CTP_transf_2                                               | 1.20E-12 |

|            |           |                |                                                              |          |
|------------|-----------|----------------|--------------------------------------------------------------|----------|
| 2572232545 | t3m_00901 | TIGR00125      | cytidyltransferase-like domain                               | 2.50E-23 |
| 2572232545 | t3m_00901 | KO:K14656      | FAD synthetase                                               | 9.10E-39 |
| 2572232545 | t3m_00901 | Locus_type     | CDS                                                          |          |
| 2572232545 | t3m_00901 | Product_name   | cytidyltransferase-like domain                               |          |
| 2572232545 | t3m_00901 | Scaffold       | t3m_contig_70_133_len_34754_read_count_2944360.16            |          |
| 2572232545 | t3m_00901 | Coordinates    | 31772..32191(-)                                              |          |
| 2572232545 | t3m_00901 | DNA_length     | 420bp                                                        |          |
| 2572232545 | t3m_00901 | Protein_length | 139aa                                                        |          |
| 2572232545 | t3m_00901 | GC             |                                                              | 0.69     |
| 2572232546 | t3m_00902 | KEGG_module    | M00125: Riboflavin biosynthesis, GTP => riboflavin/FMN/FAD   |          |
| 2572232546 | t3m_00902 | Metacyc        | PWY-6167: flavin biosynthesis II (archaea)                   |          |
| 2572232546 | t3m_00902 | Metacyc        | RIBOSYN2-PWY: flavin biosynthesis I (bacteria and plants)    |          |
| 2572232546 | t3m_00902 | Metacyc        | PWY-6168: flavin biosynthesis III (fungi)                    |          |
| 2572232546 | t3m_00902 | COG_category   | [H] Coenzyme transport and metabolism                        |          |
| 2572232546 | t3m_00902 | COG0108        | 3,4-dihydroxy-2-butanone 4-phosphate synthase                | 7.00E-49 |
| 2572232546 | t3m_00902 | pfam00926      | DHBP_synthase                                                | 3.80E-53 |
| 2572232546 | t3m_00902 | EC:4.1.99.12   | 3,4-dihydroxy-2-butanone-4-phosphate synthase.               |          |
| 2572232546 | t3m_00902 | TIGR00506      | 3,4-dihydroxy-2-butanone 4-phosphate synthase                | 1.00E-62 |
| 2572232546 | t3m_00902 | KO:K02858      | 3,4-dihydroxy 2-butanone 4-phosphate synthase [EC:4.1.99.12] | 0.00E+00 |
| 2572232546 | t3m_00902 | Locus_type     | CDS                                                          |          |
| 2572232546 | t3m_00902 | Product_name   | 3,4-dihydroxy-2-butanone 4-phosphate synthase                |          |
| 2572232546 | t3m_00902 | Scaffold       | t3m_contig_70_133_len_34754_read_count_2944360.16            |          |
| 2572232546 | t3m_00902 | Coordinates    | 32191..32895(-)                                              |          |
| 2572232546 | t3m_00902 | DNA_length     | 705bp                                                        |          |
| 2572232546 | t3m_00902 | Protein_length | 234aa                                                        |          |
| 2572232546 | t3m_00902 | GC             |                                                              | 0.71     |
| 2572232547 | t3m_00903 | Locus_type     | rRNA                                                         |          |
| 2572232547 | t3m_00903 | Gene_symbol    | 16S                                                          |          |
| 2572232547 | t3m_00903 | Product_name   | 16S rRNA. Archaeal SSU                                       |          |
| 2572232547 | t3m_00903 | Scaffold       | t3m_contig_70_133_len_34754_read_count_2944360.16            |          |
| 2572232547 | t3m_00903 | Coordinates    | 33224..34515(-)                                              |          |
| 2572232547 | t3m_00903 | DNA_length     | 1292bp                                                       |          |

|            |           |                |                                                                  |      |
|------------|-----------|----------------|------------------------------------------------------------------|------|
| 2572232547 | t3m_00903 | GC             |                                                                  | 0.59 |
| 2572232548 | t3m_00904 | Locus_type     | tRNA                                                             |      |
| 2572232548 | t3m_00904 | Product_name   | tRNA_Gly_GCC                                                     |      |
| 2572232548 | t3m_00904 | Scaffold       | t3m_contig_70_148_len_32708_read_count_2644530.17                |      |
| 2572232548 | t3m_00904 | Coordinates    | 1..74(+)                                                         |      |
| 2572232548 | t3m_00904 | DNA_length     | 74bp                                                             |      |
| 2572232548 | t3m_00904 | GC             |                                                                  | 0.54 |
| 2572232549 | t3m_00905 | Locus_type     | CDS                                                              |      |
| 2572232549 | t3m_00905 | Product_name   | hypothetical protein                                             |      |
| 2572232549 | t3m_00905 | Scaffold       | t3m_contig_70_148_len_32708_read_count_2644530.17                |      |
| 2572232549 | t3m_00905 | Coordinates    | 126..815(-)                                                      |      |
| 2572232549 | t3m_00905 | DNA_length     | 690bp                                                            |      |
| 2572232549 | t3m_00905 | Protein_length | 229aa                                                            |      |
| 2572232549 | t3m_00905 | GC             |                                                                  | 0.67 |
| 2572232549 | t3m_00905 | Transmembrane  | Yes                                                              |      |
| 2572232550 | t3m_00906 | Locus_type     | CDS                                                              |      |
| 2572232550 | t3m_00906 | Product_name   | hypothetical protein                                             |      |
| 2572232550 | t3m_00906 | Scaffold       | t3m_contig_70_148_len_32708_read_count_2644530.17                |      |
| 2572232550 | t3m_00906 | Coordinates    | 842..2458(-)                                                     |      |
| 2572232550 | t3m_00906 | DNA_length     | 1617bp                                                           |      |
| 2572232550 | t3m_00906 | Protein_length | 538aa                                                            |      |
| 2572232550 | t3m_00906 | GC             |                                                                  | 0.63 |
| 2572232550 | t3m_00906 | Transmembrane  | Yes                                                              |      |
| 2572232551 | t3m_00907 | Metacyc        | PWY-5770: phenazine-1-carboxylate biosynthesis                   |      |
| 2572232551 | t3m_00907 | Metacyc        | PWY-5365: linear furanocoumarin biosynthesis                     |      |
| 2572232551 | t3m_00907 | Metacyc        | PWY-5133: cohumulone biosynthesis                                |      |
| 2572232551 | t3m_00907 | Metacyc        | PWY-6262: demethylmenaquinol-8 biosynthesis II                   |      |
| 2572232551 | t3m_00907 | Metacyc        | PWY-5802: alizarin biosynthesis                                  |      |
| 2572232551 | t3m_00907 | Metacyc        | PWY-5816: all <i>trans</i> undecaprenyl diphosphate biosynthesis |      |
| 2572232551 | t3m_00907 | Metacyc        | PWY-4681: kievitone biosynthesis                                 |      |

|            |           |                |                                                                                                       |          |
|------------|-----------|----------------|-------------------------------------------------------------------------------------------------------|----------|
| 2572232551 | t3m_00907 | Metacyc        | PWY-5068: chlorophyll cycle                                                                           |          |
| 2572232551 | t3m_00907 | Metacyc        | PWY-5893: tridecaprenyl diphosphate biosynthesis                                                      |          |
| 2572232551 | t3m_00907 | Metacyc        | PWY-5817: dodecaprenyl diphosphate biosynthesis                                                       |          |
| 2572232551 | t3m_00907 | Metacyc        | PWY-2681: <i>trans</i>-zeatin biosynthesis                                                            |          |
| 2572232551 | t3m_00907 | Metacyc        | PWY-5132: humulone biosynthesis                                                                       |          |
| 2572232551 | t3m_00907 | Metacyc        | PWY-5808: hyperforin and adhyperforin biosynthesis                                                    |          |
| 2572232551 | t3m_00907 | Metacyc        | PWY-5135: xanthohumol biosynthesis                                                                    |          |
| 2572232551 | t3m_00907 | Metacyc        | PWY-6681: neurosporaxanthin biosynthesis                                                              |          |
| 2572232551 | t3m_00907 | Metacyc        | PWY-5064: chlorophyll <i>a</i> biosynthesis II                                                        |          |
| 2572232551 | t3m_00907 | Metacyc        | PWY-6403: carrageenan biosynthesis                                                                    |          |
| 2572232551 | t3m_00907 | Metacyc        | PWY-6834: spermidine biosynthesis III                                                                 |          |
| 2572232551 | t3m_00907 | Metacyc        | PWY-702: methionine biosynthesis II                                                                   |          |
| 2572232551 | t3m_00907 | Metacyc        | PWY-4502: wighteone and luteone biosynthesis                                                          |          |
| 2572232551 | t3m_00907 | Metacyc        | PWY-7169: hyperxanthone E biosynthesis                                                                |          |
| 2572232551 | t3m_00907 | Metacyc        | PWY-6936: seleno-amino acid biosynthesis                                                              |          |
| 2572232551 | t3m_00907 | Metacyc        | PWY-5027: phylloquinol biosynthesis                                                                   |          |
| 2572232551 | t3m_00907 | Metacyc        | PWY-6793: demethylmenaquinol-8 biosynthesis III                                                       |          |
| 2572232551 | t3m_00907 | COG_category   | [O] Posttranslational modification, protein turnover, chaperones                                      |          |
| 2572232551 | t3m_00907 | COG0109        | Polyprenyltransferase (cytochrome oxidase assembly factor)                                            | 7.00E-62 |
| 2572232551 | t3m_00907 | pfam01040      | UbiA                                                                                                  | 4.60E-29 |
| 2572232551 | t3m_00907 | EC:2.5.1.-     | Transferases. Transferring alkyl or aryl groups, other than methyl groups. Transferring alkyl or aryl |          |
| 2572232551 | t3m_00907 | TIGR01473      | protoheme IX farnesyltransferase                                                                      | 1.80E-78 |
| 2572232551 | t3m_00907 | KO:K02301      | protoheme IX farnesyltransferase [EC:2.5.1.-]                                                         | 0.00E+00 |
| 2572232551 | t3m_00907 | Locus_type     | CDS                                                                                                   |          |
| 2572232551 | t3m_00907 | Product_name   | protoheme IX farnesyltransferase                                                                      |          |
| 2572232551 | t3m_00907 | Scaffold       | t3m_contig_70_148_len_32708_read_count_2644530.17                                                     |          |
| 2572232551 | t3m_00907 | Coordinates    | 2765..3715(+)                                                                                         |          |
| 2572232551 | t3m_00907 | DNA_length     | 951bp                                                                                                 |          |
| 2572232551 | t3m_00907 | Protein_length | 316aa                                                                                                 |          |
| 2572232551 | t3m_00907 | GC             |                                                                                                       | 0.67     |
| 2572232551 | t3m_00907 | Transmembrane  | Yes                                                                                                   |          |
| 2572232552 | t3m_00908 | COG_category   | [F] Nucleotide transport and metabolism                                                               |          |
| 2572232552 | t3m_00908 | COG1051        | ADP-ribose pyrophosphatase                                                                            | 6.00E-12 |



|            |           |                |                                                                     |                                                                     |           |
|------------|-----------|----------------|---------------------------------------------------------------------|---------------------------------------------------------------------|-----------|
| 2572232552 | t3m_00908 | pfam00293      | NUDIX                                                               |                                                                     | 2.90E-14  |
| 2572232552 | t3m_00908 | Locus_type     |                                                                     | CDS                                                                 |           |
| 2572232552 | t3m_00908 | Product_name   |                                                                     | ADP-ribose pyrophosphatase                                          |           |
| 2572232552 | t3m_00908 | Scaffold       |                                                                     | t3m_contig_70_148_len_32708_read_count_2644530.17                   |           |
| 2572232552 | t3m_00908 | Coordinates    |                                                                     | 3980..4483(-)                                                       |           |
| 2572232552 | t3m_00908 | DNA_length     |                                                                     | 504bp                                                               |           |
| 2572232552 | t3m_00908 | Protein_length |                                                                     | 167aa                                                               |           |
| 2572232552 | t3m_00908 | GC             |                                                                     |                                                                     | 0.68      |
| 2572232553 | t3m_00909 | COG_category   | [S] Function unknown                                                |                                                                     |           |
| 2572232553 | t3m_00909 | COG4805        | Uncharacterized protein conserved in bacteria                       |                                                                     | 1.00E-23  |
| 2572232553 | t3m_00909 | pfam05960      | DUF885                                                              |                                                                     | 2.20E-61  |
| 2572232553 | t3m_00909 | Locus_type     |                                                                     | CDS                                                                 |           |
| 2572232553 | t3m_00909 | Product_name   |                                                                     | Uncharacterized protein conserved in bacteria                       |           |
| 2572232553 | t3m_00909 | Scaffold       |                                                                     | t3m_contig_70_148_len_32708_read_count_2644530.17                   |           |
| 2572232553 | t3m_00909 | Coordinates    |                                                                     | 4502..6127(-)                                                       |           |
| 2572232553 | t3m_00909 | DNA_length     |                                                                     | 1626bp                                                              |           |
| 2572232553 | t3m_00909 | Protein_length |                                                                     | 541aa                                                               |           |
| 2572232553 | t3m_00909 | GC             |                                                                     |                                                                     | 0.67      |
| 2572232554 | t3m_00910 | KEGG_module    | M00532: Photorespiration                                            |                                                                     |           |
| 2572232554 | t3m_00910 | COG_category   | [C] Energy production and conversion                                |                                                                     |           |
| 2572232554 | t3m_00910 | COG1304        | L-lactate dehydrogenase (FMN-dependent) and related alpha-hydroxy a |                                                                     | 7.00E-74  |
| 2572232554 | t3m_00910 | pfam01070      | FMN_dh                                                              |                                                                     | 4.40E-118 |
| 2572232554 | t3m_00910 | EC:1.1.3.15    | (S)-2-hydroxy-acid oxidase.                                         |                                                                     |           |
| 2572232554 | t3m_00910 | KO:K00104      | glycolate oxidase [EC:1.1.3.15]                                     |                                                                     | 0.00E+00  |
| 2572232554 | t3m_00910 | Locus_type     |                                                                     | CDS                                                                 |           |
| 2572232554 | t3m_00910 | Product_name   |                                                                     | L-lactate dehydrogenase (FMN-dependent) and related alpha-hydroxy a |           |
| 2572232554 | t3m_00910 | Scaffold       |                                                                     | t3m_contig_70_148_len_32708_read_count_2644530.17                   |           |
| 2572232554 | t3m_00910 | Coordinates    |                                                                     | 6186..7277(-)                                                       |           |
| 2572232554 | t3m_00910 | DNA_length     |                                                                     | 1092bp                                                              |           |
| 2572232554 | t3m_00910 | Protein_length |                                                                     | 363aa                                                               |           |
| 2572232554 | t3m_00910 | GC             |                                                                     |                                                                     | 0.71      |

|            |           |                |                                                                         |  |          |
|------------|-----------|----------------|-------------------------------------------------------------------------|--|----------|
| 2572232555 | t3m_00911 | COG_category   | [R] General function prediction only                                    |  |          |
| 2572232555 | t3m_00911 | COG0596        | Predicted hydrolases or acyltransferases (alpha/beta hydrolase superfa  |  | 5.00E-23 |
| 2572232555 | t3m_00911 | pfam12697      | Abhydrolase_6                                                           |  | 3.70E-31 |
| 2572232555 | t3m_00911 | EC:3.4.11.5    | Prolyl aminopeptidase.                                                  |  |          |
| 2572232555 | t3m_00911 | TIGR01250      | proline-specific peptidase, Bacillus coagulans-type subfamily           |  | 1.10E-45 |
| 2572232555 | t3m_00911 | KO:K01259      | proline iminopeptidase [EC:3.4.11.5]                                    |  | 4.40E-23 |
| 2572232555 | t3m_00911 | Locus_type     | CDS                                                                     |  |          |
| 2572232555 | t3m_00911 | Product_name   | Predicted hydrolases or acyltransferases (alpha/beta hydrolase superfan |  |          |
| 2572232555 | t3m_00911 | Scaffold       | t3m_contig_70_148_len_32708_read_count_2644530.17                       |  |          |
| 2572232555 | t3m_00911 | Coordinates    | 7461..8315(+)                                                           |  |          |
| 2572232555 | t3m_00911 | DNA_length     | 855bp                                                                   |  |          |
| 2572232555 | t3m_00911 | Protein_length | 284aa                                                                   |  |          |
| 2572232555 | t3m_00911 | GC             |                                                                         |  | 0.66     |
| 2572232556 | t3m_00912 | COG_category   | [R] General function prediction only                                    |  |          |
| 2572232556 | t3m_00912 | COG2151        | Predicted metal-sulfur cluster biosynthetic enzyme                      |  | 2.00E-26 |
| 2572232556 | t3m_00912 | pfam01883      | DUF59                                                                   |  | 7.70E-15 |
| 2572232556 | t3m_00912 | Locus_type     | CDS                                                                     |  |          |
| 2572232556 | t3m_00912 | Product_name   | Predicted metal-sulfur cluster biosynthetic enzyme                      |  |          |
| 2572232556 | t3m_00912 | Scaffold       | t3m_contig_70_148_len_32708_read_count_2644530.17                       |  |          |
| 2572232556 | t3m_00912 | Coordinates    | 8379..9104(+)                                                           |  |          |
| 2572232556 | t3m_00912 | DNA_length     | 726bp                                                                   |  |          |
| 2572232556 | t3m_00912 | Protein_length | 241aa                                                                   |  |          |
| 2572232556 | t3m_00912 | GC             |                                                                         |  | 0.71     |
| 2572232557 | t3m_00913 | pfam12847      | Methyltransf_18                                                         |  | 1.40E-10 |
| 2572232557 | t3m_00913 | Locus_type     | CDS                                                                     |  |          |
| 2572232557 | t3m_00913 | Product_name   | Methyltransferase domain                                                |  |          |
| 2572232557 | t3m_00913 | Scaffold       | t3m_contig_70_148_len_32708_read_count_2644530.17                       |  |          |
| 2572232557 | t3m_00913 | Coordinates    | 9116..9886(-)                                                           |  |          |
| 2572232557 | t3m_00913 | DNA_length     | 771bp                                                                   |  |          |
| 2572232557 | t3m_00913 | Protein_length | 256aa                                                                   |  |          |
| 2572232557 | t3m_00913 | GC             |                                                                         |  | 0.69     |

|            |           |                |                                                           |          |
|------------|-----------|----------------|-----------------------------------------------------------|----------|
| 2572232558 | t3m_00914 | Locus_type     | CDS                                                       |          |
| 2572232558 | t3m_00914 | Product_name   | hypothetical protein                                      |          |
| 2572232558 | t3m_00914 | Scaffold       | t3m_contig_70_148_len_32708_read_count_2644530.17         |          |
| 2572232558 | t3m_00914 | Coordinates    | 10046..10762(+)                                           |          |
| 2572232558 | t3m_00914 | DNA_length     | 717bp                                                     |          |
| 2572232558 | t3m_00914 | Protein_length | 238aa                                                     |          |
| 2572232558 | t3m_00914 | GC             |                                                           | 0.69     |
|            |           |                |                                                           |          |
| 2572232559 | t3m_00915 | COG_category   | [K] Transcription                                         |          |
| 2572232559 | t3m_00915 | COG1758        | DNA-directed RNA polymerase, subunit K/omega              | 7.00E-09 |
| 2572232559 | t3m_00915 | pfam01192      | RNA_pol_Rpb6                                              | 6.80E-14 |
| 2572232559 | t3m_00915 | Locus_type     | CDS                                                       |          |
| 2572232559 | t3m_00915 | Product_name   | DNA-directed RNA polymerase, subunit K/omega              |          |
| 2572232559 | t3m_00915 | Scaffold       | t3m_contig_70_148_len_32708_read_count_2644530.17         |          |
| 2572232559 | t3m_00915 | Coordinates    | 10862..11119(+)                                           |          |
| 2572232559 | t3m_00915 | DNA_length     | 258bp                                                     |          |
| 2572232559 | t3m_00915 | Protein_length | 85aa                                                      |          |
| 2572232559 | t3m_00915 | GC             |                                                           | 0.71     |
|            |           |                |                                                           |          |
| 2572232560 | t3m_00916 | KEGG_module    | M00034: Methionine salvage pathway                        |          |
| 2572232560 | t3m_00916 | Metacyc        | PWY-6756: <i>S</i>-methyl-5'-thioadenosine degradation II |          |
| 2572232560 | t3m_00916 | COG_category   | [F] Nucleotide transport and metabolism                   |          |
| 2572232560 | t3m_00916 | COG0005        | Purine nucleoside phosphorylase                           | 2.00E-66 |
| 2572232560 | t3m_00916 | pfam01048      | PNP_UDP_1                                                 | 1.50E-45 |
| 2572232560 | t3m_00916 | EC:2.4.2.28    | S-methyl-5'-thioadenosine phosphorylase.                  |          |
| 2572232560 | t3m_00916 | TIGR01694      | 5'-deoxy-5'-methylthioadenosine phosphorylase             | 3.20E-93 |
| 2572232560 | t3m_00916 | KO:K00772      | 5'-methylthioadenosine phosphorylase [EC:2.4.2.28]        | 0.00E+00 |
| 2572232560 | t3m_00916 | Locus_type     | CDS                                                       |          |
| 2572232560 | t3m_00916 | Product_name   | methylthioadenosine phosphorylase (EC 2.4.2.28)           |          |
| 2572232560 | t3m_00916 | Scaffold       | t3m_contig_70_148_len_32708_read_count_2644530.17         |          |
| 2572232560 | t3m_00916 | Coordinates    | 11129..11920(-)                                           |          |
| 2572232560 | t3m_00916 | DNA_length     | 792bp                                                     |          |
| 2572232560 | t3m_00916 | Protein_length | 263aa                                                     |          |
| 2572232560 | t3m_00916 | GC             |                                                           | 0.7      |

|            |           |                |                                                                                  |          |
|------------|-----------|----------------|----------------------------------------------------------------------------------|----------|
| 2572232561 | t3m_00917 | COG_category   | [J] Translation, ribosomal structure and biogenesis                              |          |
| 2572232561 | t3m_00917 | COG2178        | Predicted RNA-binding protein of the translin family                             | 7.00E-25 |
| 2572232561 | t3m_00917 | pfam01997      | Translin                                                                         | 9.00E-17 |
| 2572232561 | t3m_00917 | KO:K07477      | translin                                                                         | 6.30E-26 |
| 2572232561 | t3m_00917 | Locus_type     | CDS                                                                              |          |
| 2572232561 | t3m_00917 | Product_name   | Predicted RNA-binding protein of the translin family                             |          |
| 2572232561 | t3m_00917 | Scaffold       | t3m_contig_70_148_len_32708_read_count_2644530.17                                |          |
| 2572232561 | t3m_00917 | Coordinates    | 11917..12582(-)                                                                  |          |
| 2572232561 | t3m_00917 | DNA_length     | 666bp                                                                            |          |
| 2572232561 | t3m_00917 | Protein_length | 221aa                                                                            |          |
| 2572232561 | t3m_00917 | GC             |                                                                                  | 0.73     |
| 2572232562 | t3m_00918 | COG_category   | [S] Function unknown                                                             |          |
| 2572232562 | t3m_00918 | COG1849        | Uncharacterized protein conserved in archaea                                     | 5.00E-18 |
| 2572232562 | t3m_00918 | pfam04010      | DUF357                                                                           | 7.90E-27 |
| 2572232562 | t3m_00918 | KO:K09728      | hypothetical protein                                                             | 1.80E-17 |
| 2572232562 | t3m_00918 | Locus_type     | CDS                                                                              |          |
| 2572232562 | t3m_00918 | Product_name   | Uncharacterized protein conserved in archaea                                     |          |
| 2572232562 | t3m_00918 | Scaffold       | t3m_contig_70_148_len_32708_read_count_2644530.17                                |          |
| 2572232562 | t3m_00918 | Coordinates    | 12554..12850(-)                                                                  |          |
| 2572232562 | t3m_00918 | DNA_length     | 297bp                                                                            |          |
| 2572232562 | t3m_00918 | Protein_length | 98aa                                                                             |          |
| 2572232562 | t3m_00918 | GC             |                                                                                  | 0.72     |
| 2572232563 | t3m_00919 | KEGG_module    | M00007: Pentose phosphate pathway, non-oxidative phase, fructose 6P => ribose 5P |          |
| 2572232563 | t3m_00919 | KEGG_module    | M00004: Pentose phosphate pathway (Pentose phosphate cycle)                      |          |
| 2572232563 | t3m_00919 | Metacyc        | P124-PWY: Bifidobacterium shunt                                                  |          |
| 2572232563 | t3m_00919 | Metacyc        | PWY-1861: formaldehyde assimilation II (RuMP Cycle)                              |          |
| 2572232563 | t3m_00919 | Metacyc        | PWY-5723: Rubisco shunt                                                          |          |
| 2572232563 | t3m_00919 | Metacyc        | NONOXIPENT-PWY: pentose phosphate pathway (non-oxidative branch)                 |          |
| 2572232563 | t3m_00919 | Metacyc        | P185-PWY: formaldehyde assimilation III (dihydroxyacetone cycle)                 |          |
| 2572232563 | t3m_00919 | IMG_pathway    | 342: Nonoxidative pentose phosphate pathway                                      |          |
| 2572232563 | t3m_00919 | IMG_pathway    | 953: RuMP cycle rearrangement pathway - transaldolase variant                    |          |

|            |           |                |                                                                                  |          |
|------------|-----------|----------------|----------------------------------------------------------------------------------|----------|
| 2572232563 | t3m_00919 | COG_category   | [G] Carbohydrate transport and metabolism                                        |          |
| 2572232563 | t3m_00919 | COG0176        | Transaldolase                                                                    | 2.00E-63 |
| 2572232563 | t3m_00919 | pfam00923      | Transaldolase                                                                    | 4.10E-55 |
| 2572232563 | t3m_00919 | EC:2.2.1.2     | Transaldolase.                                                                   |          |
| 2572232563 | t3m_00919 | TIGR00875      | fructose-6-phosphate aldolase, TalC/MipB family                                  | 1.50E-96 |
| 2572232563 | t3m_00919 | KO:K00616      | transaldolase [EC:2.2.1.2]                                                       | 0.00E+00 |
| 2572232563 | t3m_00919 | ITERM:01500    | transaldolase (EC 2.2.1.2)                                                       |          |
| 2572232563 | t3m_00919 | Locus_type     | CDS                                                                              |          |
| 2572232563 | t3m_00919 | Product_name   | transaldolase (EC 2.2.1.2)                                                       |          |
| 2572232563 | t3m_00919 | Scaffold       | t3m_contig_70_148_len_32708_read_count_2644530.17                                |          |
| 2572232563 | t3m_00919 | Coordinates    | 12899..13546(-)                                                                  |          |
| 2572232563 | t3m_00919 | DNA_length     | 648bp                                                                            |          |
| 2572232563 | t3m_00919 | Protein_length | 215aa                                                                            |          |
| 2572232563 | t3m_00919 | GC             |                                                                                  | 0.66     |
| 2572232564 | t3m_00920 | KEGG_module    | M00165: Reductive pentose phosphate cycle (Calvin cycle)                         |          |
| 2572232564 | t3m_00920 | KEGG_module    | M00007: Pentose phosphate pathway, non-oxidative phase, fructose 6P => ribose 5P |          |
| 2572232564 | t3m_00920 | KEGG_module    | M00167: Reductive pentose phosphate cycle, glyceraldehyde-3P => RuBP             |          |
| 2572232564 | t3m_00920 | KEGG_module    | M00004: Pentose phosphate pathway (Pentose phosphate cycle)                      |          |
| 2572232564 | t3m_00920 | Metacyc        | P21-PWY: pentose phosphate pathway (partial)                                     |          |
| 2572232564 | t3m_00920 | Metacyc        | P124-PWY: Bifidobacterium shunt                                                  |          |
| 2572232564 | t3m_00920 | Metacyc        | PWY-5723: Rubisco shunt                                                          |          |
| 2572232564 | t3m_00920 | Metacyc        | NONOXIPENT-PWY: pentose phosphate pathway (non-oxidative branch)                 |          |
| 2572232564 | t3m_00920 | Metacyc        | CALVIN-PWY: Calvin-Benson-Bassham cycle                                          |          |
| 2572232564 | t3m_00920 | Metacyc        | PWY-6901: xylose degradation IV                                                  |          |
| 2572232564 | t3m_00920 | Metacyc        | PWY-1861: formaldehyde assimilation II (RuMP Cycle)                              |          |
| 2572232564 | t3m_00920 | Metacyc        | P185-PWY: formaldehyde assimilation III (dihydroxyacetone cycle)                 |          |
| 2572232564 | t3m_00920 | COG_category   | [G] Carbohydrate transport and metabolism                                        |          |
| 2572232564 | t3m_00920 | COG3958        | Transketolase, C-terminal subunit                                                | 1.00E-98 |
| 2572232564 | t3m_00920 | pfam02780      | Transketolase_C                                                                  | 1.90E-30 |
| 2572232564 | t3m_00920 | pfam02779      | Transket_pyr                                                                     | 5.90E-35 |
| 2572232564 | t3m_00920 | EC:2.2.1.1     | Transketolase.                                                                   |          |
| 2572232564 | t3m_00920 | KO:K00615      | transketolase [EC:2.2.1.1]                                                       | 0.00E+00 |
| 2572232564 | t3m_00920 | ITERM:01499    | transketolase subunit B (EC 2.2.1.1)                                             |          |

|            |           |                |                                                                                  |          |
|------------|-----------|----------------|----------------------------------------------------------------------------------|----------|
| 2572232564 | t3m_00920 | Locus_type     | CDS                                                                              |          |
| 2572232564 | t3m_00920 | Product_name   | transketolase subunit B (EC 2.2.1.1)                                             |          |
| 2572232564 | t3m_00920 | Scaffold       | t3m_contig_70_148_len_32708_read_count_2644530.17                                |          |
| 2572232564 | t3m_00920 | Coordinates    | 13572..14528(-)                                                                  |          |
| 2572232564 | t3m_00920 | DNA_length     | 957bp                                                                            |          |
| 2572232564 | t3m_00920 | Protein_length | 318aa                                                                            |          |
| 2572232564 | t3m_00920 | GC             |                                                                                  | 0.7      |
|            |           |                |                                                                                  |          |
| 2572232565 | t3m_00921 | KEGG_module    | M00167: Reductive pentose phosphate cycle, glyceraldehyde-3P => RuBP             |          |
| 2572232565 | t3m_00921 | KEGG_module    | M00007: Pentose phosphate pathway, non-oxidative phase, fructose 6P => ribose 5P |          |
| 2572232565 | t3m_00921 | KEGG_module    | M00004: Pentose phosphate pathway (Pentose phosphate cycle)                      |          |
| 2572232565 | t3m_00921 | KEGG_module    | M00165: Reductive pentose phosphate cycle (Calvin cycle)                         |          |
| 2572232565 | t3m_00921 | Metacyc        | PWY-5723: Rubisco shunt                                                          |          |
| 2572232565 | t3m_00921 | Metacyc        | P124-PWY: Bifidobacterium shunt                                                  |          |
| 2572232565 | t3m_00921 | Metacyc        | NONOXIPENT-PWY: pentose phosphate pathway (non-oxidative branch)                 |          |
| 2572232565 | t3m_00921 | Metacyc        | PWY-1861: formaldehyde assimilation II (RuMP Cycle)                              |          |
| 2572232565 | t3m_00921 | Metacyc        | P185-PWY: formaldehyde assimilation III (dihydroxyacetone cycle)                 |          |
| 2572232565 | t3m_00921 | Metacyc        | PWY-6901: xylose degradation IV                                                  |          |
| 2572232565 | t3m_00921 | Metacyc        | CALVIN-PWY: Calvin-Benson-Bassham cycle                                          |          |
| 2572232565 | t3m_00921 | Metacyc        | P21-PWY: pentose phosphate pathway (partial)                                     |          |
| 2572232565 | t3m_00921 | COG_category   | [G] Carbohydrate transport and metabolism                                        |          |
| 2572232565 | t3m_00921 | COG3959        | Transketolase, N-terminal subunit                                                | 5.00E-87 |
| 2572232565 | t3m_00921 | pfam00456      | Transketolase_N                                                                  | 1.60E-69 |
| 2572232565 | t3m_00921 | EC:2.2.1.1     | Transketolase.                                                                   |          |
| 2572232565 | t3m_00921 | KO:K00615      | transketolase [EC:2.2.1.1]                                                       | 0.00E+00 |
| 2572232565 | t3m_00921 | Locus_type     | CDS                                                                              |          |
| 2572232565 | t3m_00921 | Product_name   | transketolase subunit A (EC 2.2.1.1)                                             |          |
| 2572232565 | t3m_00921 | Scaffold       | t3m_contig_70_148_len_32708_read_count_2644530.17                                |          |
| 2572232565 | t3m_00921 | Coordinates    | 14525..15376(-)                                                                  |          |
| 2572232565 | t3m_00921 | DNA_length     | 852bp                                                                            |          |
| 2572232565 | t3m_00921 | Protein_length | 283aa                                                                            |          |
| 2572232565 | t3m_00921 | GC             |                                                                                  | 0.69     |
|            |           |                |                                                                                  |          |
| 2572232566 | t3m_00922 | IMG_pathway    | 224: Nucleotide incision repair                                                  |          |

|            |           |                |                                                                       |          |
|------------|-----------|----------------|-----------------------------------------------------------------------|----------|
| 2572232566 | t3m_00922 | IMG_pathway    | 225: Abasic site processing by AP lyase activity                      |          |
| 2572232566 | t3m_00922 | IMG_pathway    | 616: Abasic site processing by AP endonuclease activity               |          |
| 2572232566 | t3m_00922 | COG_category   | [L] Replication, recombination and repair                             |          |
| 2572232566 | t3m_00922 | COG0648        | Endonuclease IV                                                       | 2.00E-69 |
| 2572232566 | t3m_00922 | pfam01261      | AP_endonuc_2                                                          | 1.40E-32 |
| 2572232566 | t3m_00922 | EC:3.1.21.2    | Deoxyribonuclease IV (phage-T(4)-induced).                            |          |
| 2572232566 | t3m_00922 | TIGR00587      | apurinic endonuclease (APN1)                                          | 8.10E-82 |
| 2572232566 | t3m_00922 | KO:K01151      | deoxyribonuclease IV [EC:3.1.21.2]                                    | 0.00E+00 |
| 2572232566 | t3m_00922 | ITERM:00591    | Endonuclease IV (EC 3.1.21.-)                                         |          |
| 2572232566 | t3m_00922 | Locus_type     | CDS                                                                   |          |
| 2572232566 | t3m_00922 | Product_name   | Endonuclease IV (EC 3.1.21.-)                                         |          |
| 2572232566 | t3m_00922 | Scaffold       | t3m_contig_70_148_len_32708_read_count_2644530.17                     |          |
| 2572232566 | t3m_00922 | Coordinates    | 15402..16319(-)                                                       |          |
| 2572232566 | t3m_00922 | DNA_length     | 918bp                                                                 |          |
| 2572232566 | t3m_00922 | Protein_length | 305aa                                                                 |          |
| 2572232566 | t3m_00922 | GC             |                                                                       | 0.7      |
|            |           |                |                                                                       |          |
| 2572232567 | t3m_00923 | Locus_type     | rRNA                                                                  |          |
| 2572232567 | t3m_00923 | Gene_symbol    | 5S                                                                    |          |
| 2572232567 | t3m_00923 | Product_name   | 5S rRNA. Archaeal TSU                                                 |          |
| 2572232567 | t3m_00923 | Scaffold       | t3m_contig_70_148_len_32708_read_count_2644530.17                     |          |
| 2572232567 | t3m_00923 | Coordinates    | 16384..16505(-)                                                       |          |
| 2572232567 | t3m_00923 | DNA_length     | 122bp                                                                 |          |
| 2572232567 | t3m_00923 | GC             |                                                                       | 0.63     |
|            |           |                |                                                                       |          |
| 2572232568 | t3m_00924 | COG_category   | [Q] Secondary metabolites biosynthesis, transport and catabolism      |          |
| 2572232568 | t3m_00924 | COG2050        | Uncharacterized protein, possibly involved in aromatic compounds cata | 3.00E-17 |
| 2572232568 | t3m_00924 | pfam03061      | 4HBT                                                                  | 4.50E-17 |
| 2572232568 | t3m_00924 | TIGR00369      | uncharacterized domain 1                                              | 1.00E-23 |
| 2572232568 | t3m_00924 | Locus_type     | CDS                                                                   |          |
| 2572232568 | t3m_00924 | Product_name   | uncharacterized domain 1                                              |          |
| 2572232568 | t3m_00924 | Scaffold       | t3m_contig_70_148_len_32708_read_count_2644530.17                     |          |
| 2572232568 | t3m_00924 | Coordinates    | 16532..17056(-)                                                       |          |
| 2572232568 | t3m_00924 | DNA_length     | 525bp                                                                 |          |

|            |           |                |                                                                                  |          |
|------------|-----------|----------------|----------------------------------------------------------------------------------|----------|
| 2572232568 | t3m_00924 | Protein_length | 174aa                                                                            |          |
| 2572232568 | t3m_00924 | GC             |                                                                                  | 0.72     |
| 2572232569 | t3m_00925 | KEGG_module    | M00095: C5 isoprenoid biosynthesis, mevalonate pathway                           |          |
| 2572232569 | t3m_00925 | Metacyc        | PWY-922: mevalonate pathway I                                                    |          |
| 2572232569 | t3m_00925 | IMG_pathway    | 178: Mevalonate pathway for isopentenyl pyrophosphate synthesis                  |          |
| 2572232569 | t3m_00925 | COG_category   | [I] Lipid transport and metabolism                                               |          |
| 2572232569 | t3m_00925 | COG3407        | Mevalonate pyrophosphate decarboxylase                                           | 2.00E-61 |
| 2572232569 | t3m_00925 | pfam00288      | GHMP_kinases_N                                                                   | 3.60E-07 |
| 2572232569 | t3m_00925 | EC:4.1.1.33    | Diphosphomevalonate decarboxylase.                                               |          |
| 2572232569 | t3m_00925 | TIGR01240      | diphosphomevalonate decarboxylase                                                | 4.80E-74 |
| 2572232569 | t3m_00925 | KO:K01597      | diphosphomevalonate decarboxylase [EC:4.1.1.33]                                  | 0.00E+00 |
| 2572232569 | t3m_00925 | ITERM:00468    | diphosphomevalonate decarboxylase (EC 4.1.1.33)                                  |          |
| 2572232569 | t3m_00925 | Locus_type     | CDS                                                                              |          |
| 2572232569 | t3m_00925 | Product_name   | diphosphomevalonate decarboxylase (EC 4.1.1.33)                                  |          |
| 2572232569 | t3m_00925 | Scaffold       | t3m_contig_70_148_len_32708_read_count_2644530.17                                |          |
| 2572232569 | t3m_00925 | Coordinates    | 17116..18123(+)                                                                  |          |
| 2572232569 | t3m_00925 | DNA_length     | 1008bp                                                                           |          |
| 2572232569 | t3m_00925 | Protein_length | 335aa                                                                            |          |
| 2572232569 | t3m_00925 | GC             |                                                                                  | 0.72     |
| 2572232570 | t3m_00926 | KEGG_module    | M00007: Pentose phosphate pathway, non-oxidative phase, fructose 6P => ribose 5P |          |
| 2572232570 | t3m_00926 | KEGG_module    | M00165: Reductive pentose phosphate cycle (Calvin cycle)                         |          |
| 2572232570 | t3m_00926 | KEGG_module    | M00004: Pentose phosphate pathway (Pentose phosphate cycle)                      |          |
| 2572232570 | t3m_00926 | KEGG_module    | M00167: Reductive pentose phosphate cycle, glyceraldehyde-3P => RuBP             |          |
| 2572232570 | t3m_00926 | Metacyc        | PWY-5723: Rubisco shunt                                                          |          |
| 2572232570 | t3m_00926 | Metacyc        | NONOXIPENT-PWY: pentose phosphate pathway (non-oxidative branch)                 |          |
| 2572232570 | t3m_00926 | Metacyc        | P124-PWY: Bifidobacterium shunt                                                  |          |
| 2572232570 | t3m_00926 | Metacyc        | PWY-1861: formaldehyde assimilation II (RuMP Cycle)                              |          |
| 2572232570 | t3m_00926 | Metacyc        | CALVIN-PWY: Calvin-Benson-Bassham cycle                                          |          |
| 2572232570 | t3m_00926 | Metacyc        | P185-PWY: formaldehyde assimilation III (dihydroxyacetone cycle)                 |          |
| 2572232570 | t3m_00926 | IMG_pathway    | 341: Oxidative pentose phosphate pathway                                         |          |
| 2572232570 | t3m_00926 | IMG_pathway    | 342: Nonoxidative pentose phosphate pathway                                      |          |
| 2572232570 | t3m_00926 | IMG_pathway    | 343: Reverse ribulose monophosphate pathway                                      |          |



|            |           |                |                                                             |          |
|------------|-----------|----------------|-------------------------------------------------------------|----------|
| 2572232570 | t3m_00926 | IMG_pathway    | 527: Calvin cycle                                           |          |
| 2572232570 | t3m_00926 | IMG_pathway    | 535: D-allose conversion to D-fructose 6-phosphate          |          |
| 2572232570 | t3m_00926 | COG_category   | [G] Carbohydrate transport and metabolism                   |          |
| 2572232570 | t3m_00926 | COG0120        | Ribose 5-phosphate isomerase                                | 6.00E-51 |
| 2572232570 | t3m_00926 | pfam06026      | Rib_5-P_isom_A                                              | 8.50E-49 |
| 2572232570 | t3m_00926 | EC:5.3.1.6     | Ribose-5-phosphate isomerase.                               |          |
| 2572232570 | t3m_00926 | TIGR00021      | ribose 5-phosphate isomerase                                | 4.20E-63 |
| 2572232570 | t3m_00926 | KO:K01807      | ribose 5-phosphate isomerase A [EC:5.3.1.6]                 | 1.60E-42 |
| 2572232570 | t3m_00926 | ITERM:01495    | ribose-5-phosphate isomerase (EC 5.3.1.6)                   |          |
| 2572232570 | t3m_00926 | Locus_type     | CDS                                                         |          |
| 2572232570 | t3m_00926 | Product_name   | ribose-5-phosphate isomerase (EC 5.3.1.6)                   |          |
| 2572232570 | t3m_00926 | Scaffold       | t3m_contig_70_148_len_32708_read_count_2644530.17           |          |
| 2572232570 | t3m_00926 | Coordinates    | 18138..18848(-)                                             |          |
| 2572232570 | t3m_00926 | DNA_length     | 711bp                                                       |          |
| 2572232570 | t3m_00926 | Protein_length | 236aa                                                       |          |
| 2572232570 | t3m_00926 | GC             |                                                             | 0.72     |
| 2572232571 | t3m_00927 | COG_category   | [F] Nucleotide transport and metabolism                     |          |
| 2572232571 | t3m_00927 | COG0528        | Uridylate kinase                                            | 2.00E-32 |
| 2572232571 | t3m_00927 | pfam00696      | AA_kinase                                                   | 4.20E-24 |
| 2572232571 | t3m_00927 | EC:2.7.4.22    | UMP kinase.                                                 |          |
| 2572232571 | t3m_00927 | TIGR02076      | uridylate kinase, putative                                  | 1.40E-62 |
| 2572232571 | t3m_00927 | KO:K09903      | uridylate kinase [EC:2.7.4.22]                              | 3.00E-37 |
| 2572232571 | t3m_00927 | Locus_type     | CDS                                                         |          |
| 2572232571 | t3m_00927 | Product_name   | uridylate kinase, putative                                  |          |
| 2572232571 | t3m_00927 | Scaffold       | t3m_contig_70_148_len_32708_read_count_2644530.17           |          |
| 2572232571 | t3m_00927 | Coordinates    | 18933..19664(+)                                             |          |
| 2572232571 | t3m_00927 | DNA_length     | 732bp                                                       |          |
| 2572232571 | t3m_00927 | Protein_length | 243aa                                                       |          |
| 2572232571 | t3m_00927 | GC             |                                                             | 0.73     |
| 2572232572 | t3m_00928 | KEGG_module    | M00049: Adenine ribonucleotide biosynthesis, IMP => ADP,ATP |          |
| 2572232572 | t3m_00928 | Metacyc        | PWY-6126: adenosine nucleotides <i>de novo</i> biosynthesis |          |
| 2572232572 | t3m_00928 | COG_category   | [F] Nucleotide transport and metabolism                     |          |

|            |           |                |                                                   |          |
|------------|-----------|----------------|---------------------------------------------------|----------|
| 2572232572 | t3m_00928 | COG0563        | Adenylate kinase and related kinases              | 3.00E-42 |
| 2572232572 | t3m_00928 | pfam05191      | ADK_lid                                           | 3.80E-14 |
| 2572232572 | t3m_00928 | pfam00406      | ADK                                               | 5.90E-48 |
| 2572232572 | t3m_00928 | EC:2.7.4.3     | Adenylate kinase.                                 |          |
| 2572232572 | t3m_00928 | TIGR01351      | adenylate kinase                                  | 7.70E-75 |
| 2572232572 | t3m_00928 | KO:K00939      | adenylate kinase [EC:2.7.4.3]                     | 0.00E+00 |
| 2572232572 | t3m_00928 | ITERM:00632    | Adenylate kinase (EC 2.7.4.3)                     |          |
| 2572232572 | t3m_00928 | Locus_type     | CDS                                               |          |
| 2572232572 | t3m_00928 | Product_name   | Adenylate kinase (EC 2.7.4.3)                     |          |
| 2572232572 | t3m_00928 | Scaffold       | t3m_contig_70_148_len_32708_read_count_2644530.17 |          |
| 2572232572 | t3m_00928 | Coordinates    | 19689..20321(+)                                   |          |
| 2572232572 | t3m_00928 | DNA_length     | 633bp                                             |          |
| 2572232572 | t3m_00928 | Protein_length | 210aa                                             |          |
| 2572232572 | t3m_00928 | GC             |                                                   | 0.71     |
|            |           |                |                                                   |          |
| 2572232573 | t3m_00929 | pfam00300      | His_Phos_1                                        | 9.20E-10 |
| 2572232573 | t3m_00929 | Locus_type     | CDS                                               |          |
| 2572232573 | t3m_00929 | Product_name   | Histidine phosphatase superfamily (branch 1)      |          |
| 2572232573 | t3m_00929 | Scaffold       | t3m_contig_70_148_len_32708_read_count_2644530.17 |          |
| 2572232573 | t3m_00929 | Coordinates    | 20335..20862(-)                                   |          |
| 2572232573 | t3m_00929 | DNA_length     | 528bp                                             |          |
| 2572232573 | t3m_00929 | Protein_length | 175aa                                             |          |
| 2572232573 | t3m_00929 | GC             |                                                   | 0.69     |
|            |           |                |                                                   |          |
| 2572232574 | t3m_00930 | Locus_type     | tRNA                                              |          |
| 2572232574 | t3m_00930 | Product_name   | tRNA_Tyr_GTA                                      |          |
| 2572232574 | t3m_00930 | Scaffold       | t3m_contig_70_148_len_32708_read_count_2644530.17 |          |
| 2572232574 | t3m_00930 | Coordinates    | 20927..21033(+)                                   |          |
| 2572232574 | t3m_00930 | DNA_length     | 74bp                                              |          |
| 2572232574 | t3m_00930 | GC             |                                                   | 0.65     |
|            |           |                |                                                   |          |
| 2572232575 | t3m_00931 | Locus_type     | tRNA                                              |          |
| 2572232575 | t3m_00931 | Product_name   | tRNA_Gly_CCC                                      |          |
| 2572232575 | t3m_00931 | Scaffold       | t3m_contig_70_148_len_32708_read_count_2644530.17 |          |

|            |           |                |                                                                       |          |
|------------|-----------|----------------|-----------------------------------------------------------------------|----------|
| 2572232575 | t3m_00931 | Coordinates    | 21132..21203(-)                                                       |          |
| 2572232575 | t3m_00931 | DNA_length     | 72bp                                                                  |          |
| 2572232575 | t3m_00931 | GC             |                                                                       | 0.57     |
| 2572232576 | t3m_00932 | Locus_type     | CDS                                                                   |          |
| 2572232576 | t3m_00932 | Product_name   | hypothetical protein                                                  |          |
| 2572232576 | t3m_00932 | Scaffold       | t3m_contig_70_148_len_32708_read_count_2644530.17                     |          |
| 2572232576 | t3m_00932 | Coordinates    | 21452..22576(+)                                                       |          |
| 2572232576 | t3m_00932 | DNA_length     | 1125bp                                                                |          |
| 2572232576 | t3m_00932 | Protein_length | 374aa                                                                 |          |
| 2572232576 | t3m_00932 | GC             |                                                                       | 0.64     |
| 2572232576 | t3m_00932 | Transmembrane  | Yes                                                                   |          |
| 2572232577 | t3m_00933 | COG_category   | [U] Intracellular trafficking, secretion, and vesicular transport     |          |
| 2572232577 | t3m_00933 | COG_category   | [N] Cell motility                                                     |          |
| 2572232577 | t3m_00933 | COG0630        | Type IV secretory pathway, VirB11 components, and related ATPases in  | 3.00E-87 |
| 2572232577 | t3m_00933 | pfam00437      | T2SE                                                                  | 1.10E-42 |
| 2572232577 | t3m_00933 | KO:K07332      | archaeal flagellar protein FlaI                                       | 0.00E+00 |
| 2572232577 | t3m_00933 | Locus_type     | CDS                                                                   |          |
| 2572232577 | t3m_00933 | Product_name   | Type IV secretory pathway, VirB11 components, and related ATPases inv |          |
| 2572232577 | t3m_00933 | Scaffold       | t3m_contig_70_148_len_32708_read_count_2644530.17                     |          |
| 2572232577 | t3m_00933 | Coordinates    | 22581..24245(+)                                                       |          |
| 2572232577 | t3m_00933 | DNA_length     | 1665bp                                                                |          |
| 2572232577 | t3m_00933 | Protein_length | 554aa                                                                 |          |
| 2572232577 | t3m_00933 | GC             |                                                                       | 0.65     |
| 2572232578 | t3m_00934 | pfam00482      | T2SF                                                                  | 2.40E-12 |
| 2572232578 | t3m_00934 | KO:K07333      | archaeal flagellar protein FlaJ                                       | 0.00E+00 |
| 2572232578 | t3m_00934 | Locus_type     | CDS                                                                   |          |
| 2572232578 | t3m_00934 | Product_name   | Type II secretion system (T2SS), protein F                            |          |
| 2572232578 | t3m_00934 | Scaffold       | t3m_contig_70_148_len_32708_read_count_2644530.17                     |          |
| 2572232578 | t3m_00934 | Coordinates    | 24242..25231(+)                                                       |          |
| 2572232578 | t3m_00934 | DNA_length     | 990bp                                                                 |          |
| 2572232578 | t3m_00934 | Protein_length | 329aa                                                                 |          |

|            |           |                |                                                                           |          |
|------------|-----------|----------------|---------------------------------------------------------------------------|----------|
| 2572232578 | t3m_00934 | GC             |                                                                           | 0.67     |
| 2572232578 | t3m_00934 | Transmembrane  | Yes                                                                       |          |
| 2572232579 | t3m_00935 | pfam00482      | T2SF                                                                      | 1.80E-17 |
| 2572232579 | t3m_00935 | KO:K07333      | archaeal flagellar protein FlaJ                                           | 0.00E+00 |
| 2572232579 | t3m_00935 | Locus_type     | CDS                                                                       |          |
| 2572232579 | t3m_00935 | Product_name   | Type II secretion system (T2SS), protein F                                |          |
| 2572232579 | t3m_00935 | Scaffold       | t3m_contig_70_148_len_32708_read_count_2644530.17                         |          |
| 2572232579 | t3m_00935 | Coordinates    | 25233..26207(+)                                                           |          |
| 2572232579 | t3m_00935 | DNA_length     | 975bp                                                                     |          |
| 2572232579 | t3m_00935 | Protein_length | 324aa                                                                     |          |
| 2572232579 | t3m_00935 | GC             |                                                                           | 0.68     |
| 2572232579 | t3m_00935 | Transmembrane  | Yes                                                                       |          |
| 2572232580 | t3m_00936 | COG_category   | [U] Intracellular trafficking, secretion, and vesicular transport         |          |
| 2572232580 | t3m_00936 | COG_category   | [N] Cell motility                                                         |          |
| 2572232580 | t3m_00936 | COG0630        | Type IV secretory pathway, VirB11 components, and related ATPases in      | 6.00E-89 |
| 2572232580 | t3m_00936 | pfam00437      | T2SE                                                                      | 1.20E-42 |
| 2572232580 | t3m_00936 | KO:K07332      | archaeal flagellar protein FlaI                                           | 0.00E+00 |
| 2572232580 | t3m_00936 | Locus_type     | CDS                                                                       |          |
| 2572232580 | t3m_00936 | Product_name   | Type IV secretory pathway, VirB11 components, and related ATPases inv     |          |
| 2572232580 | t3m_00936 | Scaffold       | t3m_contig_70_148_len_32708_read_count_2644530.17                         |          |
| 2572232580 | t3m_00936 | Coordinates    | 26224..27987(+)                                                           |          |
| 2572232580 | t3m_00936 | DNA_length     | 1764bp                                                                    |          |
| 2572232580 | t3m_00936 | Protein_length | 587aa                                                                     |          |
| 2572232580 | t3m_00936 | GC             |                                                                           | 0.66     |
| 2572232581 | t3m_00937 | COG_category   | [L] Replication, recombination and repair                                 |          |
| 2572232581 | t3m_00937 | COG0863        | DNA modification methylase                                                | 7.00E-17 |
| 2572232581 | t3m_00937 | pfam01555      | N6_N4_Mtase                                                               | 3.30E-30 |
| 2572232581 | t3m_00937 | EC:2.1.1.113   | Site-specific DNA-methyltransferase (cytosine-N(4)-specific).             |          |
| 2572232581 | t3m_00937 | KO:K00590      | site-specific DNA-methyltransferase (cytosine-N4-specific) [EC:2.1.1.113] | 0.00E+00 |
| 2572232581 | t3m_00937 | Locus_type     | CDS                                                                       |          |
| 2572232581 | t3m_00937 | Product_name   | DNA modification methylase                                                |          |

|            |           |                |                                       |                                                   |          |
|------------|-----------|----------------|---------------------------------------|---------------------------------------------------|----------|
| 2572232581 | t3m_00937 | Scaffold       |                                       | t3m_contig_70_148_len_32708_read_count_2644530.17 |          |
| 2572232581 | t3m_00937 | Coordinates    |                                       | 28048..28989(+)                                   |          |
| 2572232581 | t3m_00937 | DNA_length     |                                       | 942bp                                             |          |
| 2572232581 | t3m_00937 | Protein_length |                                       | 313aa                                             |          |
| 2572232581 | t3m_00937 | GC             |                                       |                                                   | 0.73     |
|            |           |                |                                       |                                                   |          |
| 2572232582 | t3m_00938 | Locus_type     |                                       | CDS                                               |          |
| 2572232582 | t3m_00938 | Product_name   |                                       | hypothetical protein                              |          |
| 2572232582 | t3m_00938 | Scaffold       |                                       | t3m_contig_70_148_len_32708_read_count_2644530.17 |          |
| 2572232582 | t3m_00938 | Coordinates    |                                       | 28952..29389(-)                                   |          |
| 2572232582 | t3m_00938 | DNA_length     |                                       | 438bp                                             |          |
| 2572232582 | t3m_00938 | Protein_length |                                       | 145aa                                             |          |
| 2572232582 | t3m_00938 | GC             |                                       |                                                   | 0.69     |
|            |           |                |                                       |                                                   |          |
| 2572232583 | t3m_00939 | pfam13519      | VWA_2                                 |                                                   | 2.70E-07 |
| 2572232583 | t3m_00939 | Locus_type     |                                       | CDS                                               |          |
| 2572232583 | t3m_00939 | Product_name   |                                       | von Willebrand factor type A domain               |          |
| 2572232583 | t3m_00939 | Scaffold       |                                       | t3m_contig_70_148_len_32708_read_count_2644530.17 |          |
| 2572232583 | t3m_00939 | Coordinates    |                                       | 29452..30885(-)                                   |          |
| 2572232583 | t3m_00939 | DNA_length     |                                       | 1434bp                                            |          |
| 2572232583 | t3m_00939 | Protein_length |                                       | 477aa                                             |          |
| 2572232583 | t3m_00939 | GC             |                                       |                                                   | 0.71     |
|            |           |                |                                       |                                                   |          |
| 2572232584 | t3m_00940 | COG_category   | [H] Coenzyme transport and metabolism |                                                   |          |
| 2572232584 | t3m_00940 | COG1239        | Mg-chelatase subunit ChII             |                                                   | 2.00E-14 |
| 2572232584 | t3m_00940 | pfam08298      | AAA_PrkA                              |                                                   | 8.90E-12 |
| 2572232584 | t3m_00940 | Locus_type     |                                       | CDS                                               |          |
| 2572232584 | t3m_00940 | Product_name   |                                       | Mg-chelatase subunit ChII                         |          |
| 2572232584 | t3m_00940 | Scaffold       |                                       | t3m_contig_70_148_len_32708_read_count_2644530.17 |          |
| 2572232584 | t3m_00940 | Coordinates    |                                       | 31247..32707(-)                                   |          |
| 2572232584 | t3m_00940 | DNA_length     |                                       | 1461bp                                            |          |
| 2572232584 | t3m_00940 | Protein_length |                                       | 486aa                                             |          |
| 2572232584 | t3m_00940 | GC             |                                       |                                                   | 0.69     |

|            |           |                |                                                                                |                                                                      |          |
|------------|-----------|----------------|--------------------------------------------------------------------------------|----------------------------------------------------------------------|----------|
| 2572232585 | t3m_00941 | pfam02775      | TPP_enzyme_C                                                                   |                                                                      | 4.70E-21 |
| 2572232585 | t3m_00941 | Locus_type     |                                                                                | CDS                                                                  |          |
| 2572232585 | t3m_00941 | Product_name   |                                                                                | Thiamine pyrophosphate enzyme, C-terminal TPP binding domain         |          |
| 2572232585 | t3m_00941 | Scaffold       |                                                                                | t3m_contig_70_149_len_32466_read_count_2958036.18                    |          |
| 2572232585 | t3m_00941 | Coordinates    |                                                                                | 2..451(-)                                                            |          |
| 2572232585 | t3m_00941 | DNA_length     |                                                                                | 450bp                                                                |          |
| 2572232585 | t3m_00941 | Protein_length |                                                                                | 150aa                                                                |          |
| 2572232585 | t3m_00941 | GC             |                                                                                |                                                                      | 0.66     |
| 2572232586 | t3m_00942 | KEGG_module    | M00311: 2-oxoglutarate:ferredoxin oxidoreductase                               |                                                                      |          |
| 2572232586 | t3m_00942 | KEGG_module    | M00173: Reductive citric acid cycle (Arnon-Buchanan cycle)                     |                                                                      |          |
| 2572232586 | t3m_00942 | KEGG_module    | M00011: Citrate cycle, second carbon oxidation, 2-oxoglutarate => oxaloacetate |                                                                      |          |
| 2572232586 | t3m_00942 | Metacyc        | P42-PWY: incomplete reductive TCA cycle                                        |                                                                      |          |
| 2572232586 | t3m_00942 | Metacyc        | PWY-6969: TCA cycle V (2-oxoglutarate:ferredoxin oxidoreductase)               |                                                                      |          |
| 2572232586 | t3m_00942 | Metacyc        | REDCITCYC: TCA cycle III (helicobacter)                                        |                                                                      |          |
| 2572232586 | t3m_00942 | Metacyc        | P23-PWY: reductive TCA cycle I                                                 |                                                                      |          |
| 2572232586 | t3m_00942 | Metacyc        | PWY-5392: reductive TCA cycle II                                               |                                                                      |          |
| 2572232586 | t3m_00942 | COG_category   | [C] Energy production and conversion                                           |                                                                      |          |
| 2572232586 | t3m_00942 | COG0674        | Pyruvate:ferredoxin oxidoreductase and related 2-oxoacid:ferredoxin o          |                                                                      | 2.00E-74 |
| 2572232586 | t3m_00942 | pfam01855      | POR_N                                                                          |                                                                      | 1.50E-70 |
| 2572232586 | t3m_00942 | EC:1.2.7.3     | 2-oxoglutarate synthase.                                                       |                                                                      |          |
| 2572232586 | t3m_00942 | KO:K00174      | 2-oxoglutarate ferredoxin oxidoreductase subunit alpha [EC:1.2.7.3]            |                                                                      | 0.00E+00 |
| 2572232586 | t3m_00942 | ITERM:01389    | 2-oxoglutarate ferredoxin oxidoreductase, alpha subunit (EC 1.2.7.3)           |                                                                      |          |
| 2572232586 | t3m_00942 | Locus_type     |                                                                                | CDS                                                                  |          |
| 2572232586 | t3m_00942 | Product_name   |                                                                                | 2-oxoglutarate ferredoxin oxidoreductase, alpha subunit (EC 1.2.7.3) |          |
| 2572232586 | t3m_00942 | Scaffold       |                                                                                | t3m_contig_70_149_len_32466_read_count_2958036.18                    |          |
| 2572232586 | t3m_00942 | Coordinates    |                                                                                | 421..1626(-)                                                         |          |
| 2572232586 | t3m_00942 | DNA_length     |                                                                                | 1206bp                                                               |          |
| 2572232586 | t3m_00942 | Protein_length |                                                                                | 401aa                                                                |          |
| 2572232586 | t3m_00942 | GC             |                                                                                |                                                                      | 0.67     |
| 2572232587 | t3m_00943 | KEGG_module    | M00011: Citrate cycle, second carbon oxidation, 2-oxoglutarate => oxaloacetate |                                                                      |          |
| 2572232587 | t3m_00943 | KEGG_module    | M00311: 2-oxoglutarate:ferredoxin oxidoreductase                               |                                                                      |          |
| 2572232587 | t3m_00943 | Metacyc        | PWY-5392: reductive TCA cycle II                                               |                                                                      |          |

|            |           |                |                                                                            |          |
|------------|-----------|----------------|----------------------------------------------------------------------------|----------|
| 2572232587 | t3m_00943 | Metacyc        | PWY-6969: TCA cycle V (2-oxoglutarate:ferredoxin oxidoreductase)           |          |
| 2572232587 | t3m_00943 | Metacyc        | REDCITCYC: TCA cycle III (helicobacter)                                    |          |
| 2572232587 | t3m_00943 | Metacyc        | P23-PWY: reductive TCA cycle I                                             |          |
| 2572232587 | t3m_00943 | Metacyc        | P42-PWY: incomplete reductive TCA cycle                                    |          |
| 2572232587 | t3m_00943 | pfam12838      | Fer4_7                                                                     | 5.10E-08 |
| 2572232587 | t3m_00943 | EC:1.2.7.3     | 2-oxoglutarate synthase.                                                   |          |
| 2572232587 | t3m_00943 | KO:K00176      | 2-oxoglutarate ferredoxin oxidoreductase subunit delta [EC:1.2.7.3]        | 1.10E-18 |
| 2572232587 | t3m_00943 | Locus_type     | CDS                                                                        |          |
| 2572232587 | t3m_00943 | Product_name   | 4Fe-4S dicluster domain                                                    |          |
| 2572232587 | t3m_00943 | Scaffold       | t3m_contig_70_149_len_32466_read_count_2958036.18                          |          |
| 2572232587 | t3m_00943 | Coordinates    | 1623..1910(-)                                                              |          |
| 2572232587 | t3m_00943 | DNA_length     | 288bp                                                                      |          |
| 2572232587 | t3m_00943 | Protein_length | 95aa                                                                       |          |
| 2572232587 | t3m_00943 | GC             |                                                                            | 0.62     |
| 2572232588 | t3m_00944 | pfam07690      | MFS_1                                                                      | 1.10E-35 |
| 2572232588 | t3m_00944 | Locus_type     | CDS                                                                        |          |
| 2572232588 | t3m_00944 | Product_name   | Major Facilitator Superfamily                                              |          |
| 2572232588 | t3m_00944 | Scaffold       | t3m_contig_70_149_len_32466_read_count_2958036.18                          |          |
| 2572232588 | t3m_00944 | Coordinates    | 2131..3756(+)                                                              |          |
| 2572232588 | t3m_00944 | DNA_length     | 1626bp                                                                     |          |
| 2572232588 | t3m_00944 | Protein_length | 541aa                                                                      |          |
| 2572232588 | t3m_00944 | GC             |                                                                            | 0.64     |
| 2572232588 | t3m_00944 | Transmembrane  | Yes                                                                        |          |
| 2572232589 | t3m_00945 | COG_category   | [R] General function prediction only                                       |          |
| 2572232589 | t3m_00945 | COG0596        | Predicted hydrolases or acyltransferases (alpha/beta hydrolase superfa     | 3.00E-24 |
| 2572232589 | t3m_00945 | pfam12697      | Abhydrolase_6                                                              | 2.80E-34 |
| 2572232589 | t3m_00945 | EC:3.4.11.5    | Prolyl aminopeptidase.                                                     |          |
| 2572232589 | t3m_00945 | TIGR01250      | proline-specific peptidase, Bacillus coagulans-type subfamily              | 1.80E-87 |
| 2572232589 | t3m_00945 | KO:K01259      | proline iminopeptidase [EC:3.4.11.5]                                       | 0.00E+00 |
| 2572232589 | t3m_00945 | ITERM:04888    | tricorn interacting aminopeptidase F1. Serine peptidase. MEROPS family S33 |          |
| 2572232589 | t3m_00945 | Locus_type     | CDS                                                                        |          |
| 2572232589 | t3m_00945 | Product_name   | tricorn interacting aminopeptidase F1. Serine peptidase. MEROPS family     |          |

|            |           |                |                                                                    |                                                                    |          |
|------------|-----------|----------------|--------------------------------------------------------------------|--------------------------------------------------------------------|----------|
| 2572232589 | t3m_00945 | Scaffold       |                                                                    | t3m_contig_70_149_len_32466_read_count_2958036.18                  |          |
| 2572232589 | t3m_00945 | Coordinates    |                                                                    | 3740..4651(-)                                                      |          |
| 2572232589 | t3m_00945 | DNA_length     |                                                                    | 912bp                                                              |          |
| 2572232589 | t3m_00945 | Protein_length |                                                                    | 303aa                                                              |          |
| 2572232589 | t3m_00945 | GC             |                                                                    |                                                                    | 0.65     |
| 2572232589 | t3m_00945 | Fused_gene     |                                                                    | Yes                                                                |          |
| 2572232590 | t3m_00946 | pfam03061      | 4HBT                                                               |                                                                    | 6.60E-10 |
| 2572232590 | t3m_00946 | Locus_type     |                                                                    | CDS                                                                |          |
| 2572232590 | t3m_00946 | Product_name   |                                                                    | Thioesterase superfamily                                           |          |
| 2572232590 | t3m_00946 | Scaffold       |                                                                    | t3m_contig_70_149_len_32466_read_count_2958036.18                  |          |
| 2572232590 | t3m_00946 | Coordinates    |                                                                    | 4658..5248(+)                                                      |          |
| 2572232590 | t3m_00946 | DNA_length     |                                                                    | 591bp                                                              |          |
| 2572232590 | t3m_00946 | Protein_length |                                                                    | 196aa                                                              |          |
| 2572232590 | t3m_00946 | GC             |                                                                    |                                                                    | 0.68     |
| 2572232591 | t3m_00947 | COG_category   | [C] Energy production and conversion                               |                                                                    |          |
| 2572232591 | t3m_00947 | COG0667        | Predicted oxidoreductases (related to aryl-alcohol dehydrogenases) |                                                                    | 2.00E-89 |
| 2572232591 | t3m_00947 | pfam00248      | Aldo_ket_red                                                       |                                                                    | 1.20E-79 |
| 2572232591 | t3m_00947 | Locus_type     |                                                                    | CDS                                                                |          |
| 2572232591 | t3m_00947 | Product_name   |                                                                    | Predicted oxidoreductases (related to aryl-alcohol dehydrogenases) |          |
| 2572232591 | t3m_00947 | Scaffold       |                                                                    | t3m_contig_70_149_len_32466_read_count_2958036.18                  |          |
| 2572232591 | t3m_00947 | Coordinates    |                                                                    | 5303..6289(+)                                                      |          |
| 2572232591 | t3m_00947 | DNA_length     |                                                                    | 987bp                                                              |          |
| 2572232591 | t3m_00947 | Protein_length |                                                                    | 328aa                                                              |          |
| 2572232591 | t3m_00947 | GC             |                                                                    |                                                                    | 0.69     |
| 2572232592 | t3m_00948 | pfam06157      | DUF973                                                             |                                                                    | 2.00E-13 |
| 2572232592 | t3m_00948 | Locus_type     |                                                                    | CDS                                                                |          |
| 2572232592 | t3m_00948 | Product_name   |                                                                    | Protein of unknown function (DUF973)                               |          |
| 2572232592 | t3m_00948 | Scaffold       |                                                                    | t3m_contig_70_149_len_32466_read_count_2958036.18                  |          |
| 2572232592 | t3m_00948 | Coordinates    |                                                                    | 6601..7233(+)                                                      |          |
| 2572232592 | t3m_00948 | DNA_length     |                                                                    | 633bp                                                              |          |
| 2572232592 | t3m_00948 | Protein_length |                                                                    | 210aa                                                              |          |



|            |           |                |                                                                  |  |          |
|------------|-----------|----------------|------------------------------------------------------------------|--|----------|
| 2572232592 | t3m_00948 | GC             |                                                                  |  | 0.62     |
| 2572232592 | t3m_00948 | Transmembrane  | Yes                                                              |  |          |
| 2572232593 | t3m_00949 | COG_category   | [R] General function prediction only                             |  |          |
| 2572232593 | t3m_00949 | COG_category   | [C] Energy production and conversion                             |  |          |
| 2572232593 | t3m_00949 | COG0604        | NADPH:quinone reductase and related Zn-dependent oxidoreductases |  | 2.00E-32 |
| 2572232593 | t3m_00949 | pfam00107      | ADH_zinc_N                                                       |  | 2.30E-09 |
| 2572232593 | t3m_00949 | Locus_type     | CDS                                                              |  |          |
| 2572232593 | t3m_00949 | Product_name   | NADPH:quinone reductase and related Zn-dependent oxidoreductases |  |          |
| 2572232593 | t3m_00949 | Scaffold       | t3m_contig_70_149_len_32466_read_count_2958036.18                |  |          |
| 2572232593 | t3m_00949 | Coordinates    | 7362..8327(+)                                                    |  |          |
| 2572232593 | t3m_00949 | DNA_length     | 966bp                                                            |  |          |
| 2572232593 | t3m_00949 | Protein_length | 321aa                                                            |  |          |
| 2572232593 | t3m_00949 | GC             |                                                                  |  | 0.71     |
| 2572232594 | t3m_00950 | pfam01814      | Hemerythrin                                                      |  | 2.00E-08 |
| 2572232594 | t3m_00950 | Locus_type     | CDS                                                              |  |          |
| 2572232594 | t3m_00950 | Product_name   | Hemerythrin HHE cation binding domain                            |  |          |
| 2572232594 | t3m_00950 | Scaffold       | t3m_contig_70_149_len_32466_read_count_2958036.18                |  |          |
| 2572232594 | t3m_00950 | Coordinates    | 8429..9154(-)                                                    |  |          |
| 2572232594 | t3m_00950 | DNA_length     | 726bp                                                            |  |          |
| 2572232594 | t3m_00950 | Protein_length | 241aa                                                            |  |          |
| 2572232594 | t3m_00950 | GC             |                                                                  |  | 0.63     |
| 2572232595 | t3m_00951 | COG_category   | [R] General function prediction only                             |  |          |
| 2572232595 | t3m_00951 | COG1033        | Predicted exporters of the RND superfamily                       |  | 3.00E-44 |
| 2572232595 | t3m_00951 | pfam03176      | MMPL                                                             |  | 2.20E-37 |
| 2572232595 | t3m_00951 | pfam03176      | MMPL                                                             |  | 3.00E-41 |
| 2572232595 | t3m_00951 | Locus_type     | CDS                                                              |  |          |
| 2572232595 | t3m_00951 | Product_name   | Predicted exporters of the RND superfamily                       |  |          |
| 2572232595 | t3m_00951 | Scaffold       | t3m_contig_70_149_len_32466_read_count_2958036.18                |  |          |
| 2572232595 | t3m_00951 | Coordinates    | 9346..12276(-)                                                   |  |          |
| 2572232595 | t3m_00951 | DNA_length     | 2931bp                                                           |  |          |
| 2572232595 | t3m_00951 | Protein_length | 976aa                                                            |  |          |

|            |           |                |                                                                  |  |          |
|------------|-----------|----------------|------------------------------------------------------------------|--|----------|
| 2572232595 | t3m_00951 | GC             |                                                                  |  | 0.67     |
| 2572232595 | t3m_00951 | Transmembrane  | Yes                                                              |  |          |
| 2572232596 | t3m_00952 | Metacyc        | PWY-6935: seleno-amino acid detoxification and volatilization II |  |          |
| 2572232596 | t3m_00952 | Metacyc        | PWY1A0-6325: actinorhodin biosynthesis                           |  |          |
| 2572232596 | t3m_00952 | COG_category   | [R] General function prediction only                             |  |          |
| 2572232596 | t3m_00952 | COG0491        | Zn-dependent hydrolases, including glyoxylases                   |  | 4.00E-09 |
| 2572232596 | t3m_00952 | pfam00753      | Lactamase_B                                                      |  | 6.20E-21 |
| 2572232596 | t3m_00952 | EC:4.-         | Lyases.                                                          |  |          |
| 2572232596 | t3m_00952 | KO:K05555      | cyclase [EC:4.-.-.]                                              |  | 1.50E-24 |
| 2572232596 | t3m_00952 | Locus_type     | CDS                                                              |  |          |
| 2572232596 | t3m_00952 | Product_name   | Zn-dependent hydrolases, including glyoxylases                   |  |          |
| 2572232596 | t3m_00952 | Scaffold       | t3m_contig_70_149_len_32466_read_count_2958036.18                |  |          |
| 2572232596 | t3m_00952 | Coordinates    | 12522..13457(+)                                                  |  |          |
| 2572232596 | t3m_00952 | DNA_length     | 936bp                                                            |  |          |
| 2572232596 | t3m_00952 | Protein_length | 311aa                                                            |  |          |
| 2572232596 | t3m_00952 | GC             |                                                                  |  | 0.7      |
| 2572232597 | t3m_00953 | COG_category   | [S] Function unknown                                             |  |          |
| 2572232597 | t3m_00953 | COG4805        | Uncharacterized protein conserved in bacteria                    |  | 5.00E-34 |
| 2572232597 | t3m_00953 | pfam05960      | DUF885                                                           |  | 1.10E-60 |
| 2572232597 | t3m_00953 | Locus_type     | CDS                                                              |  |          |
| 2572232597 | t3m_00953 | Product_name   | Uncharacterized protein conserved in bacteria                    |  |          |
| 2572232597 | t3m_00953 | Scaffold       | t3m_contig_70_149_len_32466_read_count_2958036.18                |  |          |
| 2572232597 | t3m_00953 | Coordinates    | 13490..15127(-)                                                  |  |          |
| 2572232597 | t3m_00953 | DNA_length     | 1638bp                                                           |  |          |
| 2572232597 | t3m_00953 | Protein_length | 545aa                                                            |  |          |
| 2572232597 | t3m_00953 | GC             |                                                                  |  | 0.68     |
| 2572232598 | t3m_00954 | Locus_type     | CDS                                                              |  |          |
| 2572232598 | t3m_00954 | Product_name   | hypothetical protein                                             |  |          |
| 2572232598 | t3m_00954 | Scaffold       | t3m_contig_70_149_len_32466_read_count_2958036.18                |  |          |
| 2572232598 | t3m_00954 | Coordinates    | 15192..15515(-)                                                  |  |          |
| 2572232598 | t3m_00954 | DNA_length     | 324bp                                                            |  |          |

|            |           |                |                                                        |          |
|------------|-----------|----------------|--------------------------------------------------------|----------|
| 2572232598 | t3m_00954 | Protein_length | 107aa                                                  |          |
| 2572232598 | t3m_00954 | GC             |                                                        | 0.72     |
| 2572232599 | t3m_00955 | COG_category   | [J] Translation, ribosomal structure and biogenesis    |          |
| 2572232599 | t3m_00955 | COG0251        | Putative translation initiation inhibitor, yjgF family | 1.00E-11 |
| 2572232599 | t3m_00955 | pfam14588      | YjgF_endoribonc                                        | 6.00E-20 |
| 2572232599 | t3m_00955 | Locus_type     | CDS                                                    |          |
| 2572232599 | t3m_00955 | Product_name   | Putative translation initiation inhibitor, yjgF family |          |
| 2572232599 | t3m_00955 | Scaffold       | t3m_contig_70_149_len_32466_read_count_2958036.18      |          |
| 2572232599 | t3m_00955 | Coordinates    | 15600..16073(+)                                        |          |
| 2572232599 | t3m_00955 | DNA_length     | 474bp                                                  |          |
| 2572232599 | t3m_00955 | Protein_length | 157aa                                                  |          |
| 2572232599 | t3m_00955 | GC             |                                                        | 0.71     |
| 2572232600 | t3m_00956 | COG_category   | [J] Translation, ribosomal structure and biogenesis    |          |
| 2572232600 | t3m_00956 | COG1889        | Fibrillarin-like rRNA methylase                        | 2.00E-52 |
| 2572232600 | t3m_00956 | pfam01269      | Fibrillarin                                            | 1.90E-54 |
| 2572232600 | t3m_00956 | KO:K04795      | fibrillarin-like pre-rRNA processing protein           | 2.70E-37 |
| 2572232600 | t3m_00956 | Locus_type     | CDS                                                    |          |
| 2572232600 | t3m_00956 | Product_name   | Fibrillarin-like rRNA methylase                        |          |
| 2572232600 | t3m_00956 | Scaffold       | t3m_contig_70_149_len_32466_read_count_2958036.18      |          |
| 2572232600 | t3m_00956 | Coordinates    | 16070..16729(+)                                        |          |
| 2572232600 | t3m_00956 | DNA_length     | 660bp                                                  |          |
| 2572232600 | t3m_00956 | Protein_length | 219aa                                                  |          |
| 2572232600 | t3m_00956 | GC             |                                                        | 0.7      |
| 2572232601 | t3m_00957 | Locus_type     | CDS                                                    |          |
| 2572232601 | t3m_00957 | Product_name   | hypothetical protein                                   |          |
| 2572232601 | t3m_00957 | Scaffold       | t3m_contig_70_149_len_32466_read_count_2958036.18      |          |
| 2572232601 | t3m_00957 | Coordinates    | 16809..19061(+)                                        |          |
| 2572232601 | t3m_00957 | DNA_length     | 2253bp                                                 |          |
| 2572232601 | t3m_00957 | Protein_length | 750aa                                                  |          |
| 2572232601 | t3m_00957 | GC             |                                                        | 0.67     |
| 2572232601 | t3m_00957 | Transmembrane  | Yes                                                    |          |

|            |           |                |                                                   |      |
|------------|-----------|----------------|---------------------------------------------------|------|
| 2572232602 | t3m_00958 | Locus_type     | CDS                                               |      |
| 2572232602 | t3m_00958 | Product_name   | hypothetical protein                              |      |
| 2572232602 | t3m_00958 | Scaffold       | t3m_contig_70_149_len_32466_read_count_2958036.18 |      |
| 2572232602 | t3m_00958 | Coordinates    | 19208..19444(+)                                   |      |
| 2572232602 | t3m_00958 | DNA_length     | 237bp                                             |      |
| 2572232602 | t3m_00958 | Protein_length | 78aa                                              |      |
| 2572232602 | t3m_00958 | GC             |                                                   | 0.59 |
| 2572232602 | t3m_00958 | Transmembrane  | Yes                                               |      |
|            |           |                |                                                   |      |
| 2572232603 | t3m_00959 | Locus_type     | CDS                                               |      |
| 2572232603 | t3m_00959 | Product_name   | hypothetical protein                              |      |
| 2572232603 | t3m_00959 | Scaffold       | t3m_contig_70_149_len_32466_read_count_2958036.18 |      |
| 2572232603 | t3m_00959 | Coordinates    | 19455..20588(+)                                   |      |
| 2572232603 | t3m_00959 | DNA_length     | 1134bp                                            |      |
| 2572232603 | t3m_00959 | Protein_length | 377aa                                             |      |
| 2572232603 | t3m_00959 | GC             |                                                   | 0.66 |
| 2572232603 | t3m_00959 | Transmembrane  | Yes                                               |      |
|            |           |                |                                                   |      |
| 2572232604 | t3m_00960 | Locus_type     | CDS                                               |      |
| 2572232604 | t3m_00960 | Product_name   | hypothetical protein                              |      |
| 2572232604 | t3m_00960 | Scaffold       | t3m_contig_70_149_len_32466_read_count_2958036.18 |      |
| 2572232604 | t3m_00960 | Coordinates    | 20590..21372(+)                                   |      |
| 2572232604 | t3m_00960 | DNA_length     | 783bp                                             |      |
| 2572232604 | t3m_00960 | Protein_length | 260aa                                             |      |
| 2572232604 | t3m_00960 | GC             |                                                   | 0.68 |
|            |           |                |                                                   |      |
| 2572232605 | t3m_00961 | Locus_type     | CDS                                               |      |
| 2572232605 | t3m_00961 | Product_name   | hypothetical protein                              |      |
| 2572232605 | t3m_00961 | Scaffold       | t3m_contig_70_149_len_32466_read_count_2958036.18 |      |
| 2572232605 | t3m_00961 | Coordinates    | 21369..21743(+)                                   |      |
| 2572232605 | t3m_00961 | DNA_length     | 375bp                                             |      |
| 2572232605 | t3m_00961 | Protein_length | 124aa                                             |      |
| 2572232605 | t3m_00961 | GC             |                                                   | 0.68 |

|            |           |                |                                                                           |                                                   |          |
|------------|-----------|----------------|---------------------------------------------------------------------------|---------------------------------------------------|----------|
| 2572232605 | t3m_00961 | Transmembrane  |                                                                           | Yes                                               |          |
| 2572232606 | t3m_00962 | pfam12846      | AAA_10                                                                    |                                                   | 1.20E-45 |
| 2572232606 | t3m_00962 | Locus_type     |                                                                           | CDS                                               |          |
| 2572232606 | t3m_00962 | Product_name   |                                                                           | AAA-like domain                                   |          |
| 2572232606 | t3m_00962 | Scaffold       |                                                                           | t3m_contig_70_149_len_32466_read_count_2958036.18 |          |
| 2572232606 | t3m_00962 | Coordinates    |                                                                           | 21740..23434(+)                                   |          |
| 2572232606 | t3m_00962 | DNA_length     |                                                                           | 1695bp                                            |          |
| 2572232606 | t3m_00962 | Protein_length |                                                                           | 564aa                                             |          |
| 2572232606 | t3m_00962 | GC             |                                                                           |                                                   | 0.67     |
| 2572232607 | t3m_00963 | Locus_type     |                                                                           | CDS                                               |          |
| 2572232607 | t3m_00963 | Product_name   |                                                                           | hypothetical protein                              |          |
| 2572232607 | t3m_00963 | Scaffold       |                                                                           | t3m_contig_70_149_len_32466_read_count_2958036.18 |          |
| 2572232607 | t3m_00963 | Coordinates    |                                                                           | 23429..23776(-)                                   |          |
| 2572232607 | t3m_00963 | DNA_length     |                                                                           | 348bp                                             |          |
| 2572232607 | t3m_00963 | Protein_length |                                                                           | 115aa                                             |          |
| 2572232607 | t3m_00963 | GC             |                                                                           |                                                   | 0.68     |
| 2572232608 | t3m_00964 | COG_category   | [L] Replication, recombination and repair                                 |                                                   |          |
| 2572232608 | t3m_00964 | COG0863        | DNA modification methylase                                                |                                                   | 2.00E-27 |
| 2572232608 | t3m_00964 | pfam01555      | N6_N4_Mtase                                                               |                                                   | 9.60E-34 |
| 2572232608 | t3m_00964 | EC:2.1.1.113   | Site-specific DNA-methyltransferase (cytosine-N(4)-specific).             |                                                   |          |
| 2572232608 | t3m_00964 | KO:K00590      | site-specific DNA-methyltransferase (cytosine-N4-specific) [EC:2.1.1.113] |                                                   | 0.00E+00 |
| 2572232608 | t3m_00964 | Locus_type     |                                                                           | CDS                                               |          |
| 2572232608 | t3m_00964 | Product_name   |                                                                           | DNA modification methylase                        |          |
| 2572232608 | t3m_00964 | Scaffold       |                                                                           | t3m_contig_70_149_len_32466_read_count_2958036.18 |          |
| 2572232608 | t3m_00964 | Coordinates    |                                                                           | 23868..24746(-)                                   |          |
| 2572232608 | t3m_00964 | DNA_length     |                                                                           | 879bp                                             |          |
| 2572232608 | t3m_00964 | Protein_length |                                                                           | 292aa                                             |          |
| 2572232608 | t3m_00964 | GC             |                                                                           |                                                   | 0.7      |
| 2572232609 | t3m_00965 | KEGG_module    | M00345: Formaldehyde assimilation, ribulose monophosphate pathway         |                                                   |          |
| 2572232609 | t3m_00965 | Metacyc        | RUMP-PWY: formaldehyde oxidation I                                        |                                                   |          |

|            |           |                |                                                                     |          |
|------------|-----------|----------------|---------------------------------------------------------------------|----------|
| 2572232609 | t3m_00965 | Metacyc        | PWY-1861: formaldehyde assimilation II (RuMP Cycle)                 |          |
| 2572232609 | t3m_00965 | IMG_pathway    | 343: Reverse ribulose monophosphate pathway                         |          |
| 2572232609 | t3m_00965 | IMG_pathway    | 950: RuMP cycle formaldehyde fixation pathway                       |          |
| 2572232609 | t3m_00965 | COG_category   | [G] Carbohydrate transport and metabolism                           |          |
| 2572232609 | t3m_00965 | COG0269        | 3-hexulose-6-phosphate synthase and related proteins                | 7.00E-52 |
| 2572232609 | t3m_00965 | pfam03737      | Methyltransf_6                                                      | 1.60E-35 |
| 2572232609 | t3m_00965 | pfam00215      | OMPdecase                                                           | 2.90E-23 |
| 2572232609 | t3m_00965 | EC:5.3.1.27    | 6-phospho-3-hexuloisomerase.                                        |          |
| 2572232609 | t3m_00965 | EC:4.1.2.43    | 3-hexulose-6-phosphate synthase.                                    |          |
| 2572232609 | t3m_00965 | TIGR03128      | 3-hexulose-6-phosphate synthase                                     | 6.50E-67 |
| 2572232609 | t3m_00965 | KO:K13831      | 3-hexulose-6-phosphate synthase / 6-phospho-3-hexuloisomerase [EC:4 | 0.00E+00 |
| 2572232609 | t3m_00965 | ITERM:01503    | 3-hexulose-6-phosphate synthase (EC 4.1.2.43)                       |          |
| 2572232609 | t3m_00965 | Locus_type     | CDS                                                                 |          |
| 2572232609 | t3m_00965 | Product_name   | 3-hexulose-6-phosphate synthase (EC 4.1.2.43)                       |          |
| 2572232609 | t3m_00965 | Scaffold       | t3m_contig_70_149_len_32466_read_count_2958036.18                   |          |
| 2572232609 | t3m_00965 | Coordinates    | 24798..26102(+)                                                     |          |
| 2572232609 | t3m_00965 | DNA_length     | 1305bp                                                              |          |
| 2572232609 | t3m_00965 | Protein_length | 434aa                                                               |          |
| 2572232609 | t3m_00965 | GC             |                                                                     | 0.69     |
| 2572232609 | t3m_00965 | Fused_gene     | Yes                                                                 |          |
| 2572232610 | t3m_00966 | pfam01416      | PseudoU_synth_1                                                     | 1.70E-07 |
| 2572232610 | t3m_00966 | TIGR00071      | tRNA pseudouridine(38-40) synthase                                  | 2.80E-17 |
| 2572232610 | t3m_00966 | Locus_type     | CDS                                                                 |          |
| 2572232610 | t3m_00966 | Product_name   | tRNA pseudouridine synthase                                         |          |
| 2572232610 | t3m_00966 | Scaffold       | t3m_contig_70_149_len_32466_read_count_2958036.18                   |          |
| 2572232610 | t3m_00966 | Coordinates    | 26135..26734(-)                                                     |          |
| 2572232610 | t3m_00966 | DNA_length     | 600bp                                                               |          |
| 2572232610 | t3m_00966 | Protein_length | 199aa                                                               |          |
| 2572232610 | t3m_00966 | GC             |                                                                     | 0.64     |
| 2572232611 | t3m_00967 | KEGG_module    | M00222: Phosphate transport system                                  |          |
| 2572232611 | t3m_00967 | COG_category   | [P] Inorganic ion transport and metabolism                          |          |
| 2572232611 | t3m_00967 | COG0226        | ABC-type phosphate transport system, periplasmic component          | 3.00E-37 |

|            |           |                |                                                                          |          |
|------------|-----------|----------------|--------------------------------------------------------------------------|----------|
| 2572232611 | t3m_00967 | pfam12849      | PBP_like_2                                                               | 3.40E-38 |
| 2572232611 | t3m_00967 | TIGR00975      | phosphate ABC transporter, phosphate-binding protein                     | 7.30E-80 |
| 2572232611 | t3m_00967 | KO:K02040      | phosphate transport system substrate-binding protein                     | 0.00E+00 |
| 2572232611 | t3m_00967 | Locus_type     | CDS                                                                      |          |
| 2572232611 | t3m_00967 | Product_name   | phosphate ABC transporter, phosphate-binding protein                     |          |
| 2572232611 | t3m_00967 | Scaffold       | t3m_contig_70_149_len_32466_read_count_2958036.18                        |          |
| 2572232611 | t3m_00967 | Coordinates    | 27268..28410(+)                                                          |          |
| 2572232611 | t3m_00967 | DNA_length     | 1143bp                                                                   |          |
| 2572232611 | t3m_00967 | Protein_length | 380aa                                                                    |          |
| 2572232611 | t3m_00967 | GC             |                                                                          | 0.61     |
| 2572232611 | t3m_00967 | Transmembrane  | Yes                                                                      |          |
| 2572232612 | t3m_00968 | KEGG_module    | M00222: Phosphate transport system                                       |          |
| 2572232612 | t3m_00968 | COG_category   | [P] Inorganic ion transport and metabolism                               |          |
| 2572232612 | t3m_00968 | COG0573        | ABC-type phosphate transport system, permease component                  | 6.00E-63 |
| 2572232612 | t3m_00968 | pfam00528      | BPD_transp_1                                                             | 6.50E-18 |
| 2572232612 | t3m_00968 | TIGR02138      | phosphate ABC transporter, permease protein PstC                         | 6.90E-91 |
| 2572232612 | t3m_00968 | KO:K02037      | phosphate transport system permease protein                              | 0.00E+00 |
| 2572232612 | t3m_00968 | ITERM:05784    | phosphate ABC transporter membrane protein 1, PhoT family (TC 3.A.1.7.1) |          |
| 2572232612 | t3m_00968 | Locus_type     | CDS                                                                      |          |
| 2572232612 | t3m_00968 | Product_name   | phosphate ABC transporter membrane protein 1, PhoT family (TC 3.A.1.7.1) |          |
| 2572232612 | t3m_00968 | Scaffold       | t3m_contig_70_149_len_32466_read_count_2958036.18                        |          |
| 2572232612 | t3m_00968 | Coordinates    | 28548..29450(+)                                                          |          |
| 2572232612 | t3m_00968 | DNA_length     | 903bp                                                                    |          |
| 2572232612 | t3m_00968 | Protein_length | 300aa                                                                    |          |
| 2572232612 | t3m_00968 | GC             |                                                                          | 0.64     |
| 2572232612 | t3m_00968 | Transmembrane  | Yes                                                                      |          |
| 2572232613 | t3m_00969 | KEGG_module    | M00222: Phosphate transport system                                       |          |
| 2572232613 | t3m_00969 | COG_category   | [P] Inorganic ion transport and metabolism                               |          |
| 2572232613 | t3m_00969 | COG0581        | ABC-type phosphate transport system, permease component                  | 9.00E-50 |
| 2572232613 | t3m_00969 | pfam00528      | BPD_transp_1                                                             | 1.70E-19 |
| 2572232613 | t3m_00969 | TIGR00974      | phosphate ABC transporter, permease protein PstA                         | 1.10E-74 |
| 2572232613 | t3m_00969 | KO:K02038      | phosphate transport system permease protein                              | 0.00E+00 |

|            |           |                |                                                                           |           |
|------------|-----------|----------------|---------------------------------------------------------------------------|-----------|
| 2572232613 | t3m_00969 | ITERM:06114    | phosphate ABC transporter membrane protein 2, PhoT family (TC 3.A.1.7.1)  |           |
| 2572232613 | t3m_00969 | Locus_type     | CDS                                                                       |           |
| 2572232613 | t3m_00969 | Product_name   | phosphate ABC transporter membrane protein 2, PhoT family (TC 3.A.1.7.1)  |           |
| 2572232613 | t3m_00969 | Scaffold       | t3m_contig_70_149_len_32466_read_count_2958036.18                         |           |
| 2572232613 | t3m_00969 | Coordinates    | 29447..30328(+)                                                           |           |
| 2572232613 | t3m_00969 | DNA_length     | 882bp                                                                     |           |
| 2572232613 | t3m_00969 | Protein_length | 293aa                                                                     |           |
| 2572232613 | t3m_00969 | GC             |                                                                           | 0.63      |
| 2572232613 | t3m_00969 | Transmembrane  | Yes                                                                       |           |
| 2572232614 | t3m_00970 | KEGG_module    | M00222: Phosphate transport system                                        |           |
| 2572232614 | t3m_00970 | COG_category   | [P] Inorganic ion transport and metabolism                                |           |
| 2572232614 | t3m_00970 | COG1117        | ABC-type phosphate transport system, ATPase component                     | 2.00E-112 |
| 2572232614 | t3m_00970 | pfam00005      | ABC_tran                                                                  | 1.90E-31  |
| 2572232614 | t3m_00970 | EC:3.6.3.27    | Phosphate-transporting ATPase.                                            |           |
| 2572232614 | t3m_00970 | TIGR00972      | phosphate ABC transporter, ATP-binding protein                            | 7.60E-116 |
| 2572232614 | t3m_00970 | KO:K02036      | phosphate transport system ATP-binding protein [EC:3.6.3.27]              | 0.00E+00  |
| 2572232614 | t3m_00970 | ITERM:05785    | phosphate ABC transporter ATP-binding protein, PhoT family (TC 3.A.1.7.1) |           |
| 2572232614 | t3m_00970 | Locus_type     | CDS                                                                       |           |
| 2572232614 | t3m_00970 | Product_name   | phosphate ABC transporter ATP-binding protein, PhoT family (TC 3.A.1.7.1) |           |
| 2572232614 | t3m_00970 | Scaffold       | t3m_contig_70_149_len_32466_read_count_2958036.18                         |           |
| 2572232614 | t3m_00970 | Coordinates    | 30335..31090(+)                                                           |           |
| 2572232614 | t3m_00970 | DNA_length     | 756bp                                                                     |           |
| 2572232614 | t3m_00970 | Protein_length | 251aa                                                                     |           |
| 2572232614 | t3m_00970 | GC             |                                                                           | 0.62      |
| 2572232615 | t3m_00971 | COG_category   | [P] Inorganic ion transport and metabolism                                |           |
| 2572232615 | t3m_00971 | COG0704        | Phosphate uptake regulator                                                | 4.00E-27  |
| 2572232615 | t3m_00971 | pfam01895      | PhoU                                                                      | 6.20E-15  |
| 2572232615 | t3m_00971 | pfam01895      | PhoU                                                                      | 2.20E-10  |
| 2572232615 | t3m_00971 | TIGR02135      | phosphate transport system regulatory protein PhoU                        | 1.50E-41  |
| 2572232615 | t3m_00971 | KO:K02039      | phosphate transport system protein                                        | 2.40E-23  |
| 2572232615 | t3m_00971 | Locus_type     | CDS                                                                       |           |
| 2572232615 | t3m_00971 | Product_name   | Phosphate uptake regulator                                                |           |



|            |           |                |                                                                   |          |
|------------|-----------|----------------|-------------------------------------------------------------------|----------|
| 2572232615 | t3m_00971 | Scaffold       | t3m_contig_70_149_len_32466_read_count_2958036.18                 |          |
| 2572232615 | t3m_00971 | Coordinates    | 31087..31848(+)                                                   |          |
| 2572232615 | t3m_00971 | DNA_length     | 762bp                                                             |          |
| 2572232615 | t3m_00971 | Protein_length | 253aa                                                             |          |
| 2572232615 | t3m_00971 | GC             |                                                                   | 0.64     |
|            |           |                |                                                                   |          |
| 2572232616 | t3m_00972 | Locus_type     | tRNA                                                              |          |
| 2572232616 | t3m_00972 | Product_name   | tRNA_Glu_TTC                                                      |          |
| 2572232616 | t3m_00972 | Scaffold       | t3m_contig_70_149_len_32466_read_count_2958036.18                 |          |
| 2572232616 | t3m_00972 | Coordinates    | 32343..32442(+)                                                   |          |
| 2572232616 | t3m_00972 | DNA_length     | 77bp                                                              |          |
| 2572232616 | t3m_00972 | GC             |                                                                   | 0.62     |
|            |           |                |                                                                   |          |
| 2572232617 | t3m_00973 | Metacyc        | PWY-6891: thiazole biosynthesis II (Bacillus)                     |          |
| 2572232617 | t3m_00973 | Metacyc        | PWY0-1021: alanine biosynthesis III                               |          |
| 2572232617 | t3m_00973 | Metacyc        | PWY-6823: molybdenum cofactor biosynthesis                        |          |
| 2572232617 | t3m_00973 | Metacyc        | PWY-6892: thiazole biosynthesis I (E. coli)                       |          |
| 2572232617 | t3m_00973 | COG_category   | [E] Amino acid transport and metabolism                           |          |
| 2572232617 | t3m_00973 | COG0520        | Selenocysteine lyase                                              | 5.00E-87 |
| 2572232617 | t3m_00973 | pfam00266      | Aminotran_5                                                       | 4.20E-90 |
| 2572232617 | t3m_00973 | EC:2.8.1.7     | Cysteine desulfurase.                                             |          |
| 2572232617 | t3m_00973 | EC:4.4.1.16    | Selenocysteine lyase.                                             |          |
| 2572232617 | t3m_00973 | KO:K11717      | cysteine desulfurase / selenocysteine lyase [EC:2.8.1.7 4.4.1.16] | 0.00E+00 |
| 2572232617 | t3m_00973 | Locus_type     | CDS                                                               |          |
| 2572232617 | t3m_00973 | Product_name   | Selenocysteine lyase                                              |          |
| 2572232617 | t3m_00973 | Scaffold       | t3m_contig_70_156_len_31387_read_count_2567722.19                 |          |
| 2572232617 | t3m_00973 | Coordinates    | 3..1049(-)                                                        |          |
| 2572232617 | t3m_00973 | DNA_length     | 1047bp                                                            |          |
| 2572232617 | t3m_00973 | Protein_length | 349aa                                                             |          |
| 2572232617 | t3m_00973 | GC             |                                                                   | 0.71     |
|            |           |                |                                                                   |          |
| 2572232618 | t3m_00974 | Metacyc        | PWY-5665: vanilla biosynthesis                                    |          |
| 2572232618 | t3m_00974 | Metacyc        | PWY-5846: colchicine biosynthesis                                 |          |
| 2572232618 | t3m_00974 | Metacyc        | PWY-6984: lipoate salvage II                                      |          |

|            |           |                |                                                                                          |           |
|------------|-----------|----------------|------------------------------------------------------------------------------------------|-----------|
| 2572232618 | t3m_00974 | Metacyc        | PWY-6899: base-degraded thiamin salvage                                                  |           |
| 2572232618 | t3m_00974 | Metacyc        | P621-PWY: nylon-6 oligomer degradation                                                   |           |
| 2572232618 | t3m_00974 | Metacyc        | PWY-6431: 4-hydroxybenzoate biosynthesis IV                                              |           |
| 2572232618 | t3m_00974 | Metacyc        | PWY-1822: indole-3-acetate activation I                                                  |           |
| 2572232618 | t3m_00974 | Metacyc        | PWY-5784: IAA conjugate biosynthesis II                                                  |           |
| 2572232618 | t3m_00974 | Metacyc        | PWY-7018: paromomycin biosynthesis                                                       |           |
| 2572232618 | t3m_00974 | Metacyc        | LYSDEGII-PWY: lysine degradation III                                                     |           |
| 2572232618 | t3m_00974 | Metacyc        | PWY-6855: chitin degradation I (archaea)                                                 |           |
| 2572232618 | t3m_00974 | COG_category   | [R] General function prediction only                                                     |           |
| 2572232618 | t3m_00974 | COG1473        | Metal-dependent amidase/aminoacylase/carboxypeptidase                                    | 8.00E-103 |
| 2572232618 | t3m_00974 | pfam07687      | M20_dimer                                                                                | 1.50E-13  |
| 2572232618 | t3m_00974 | pfam01546      | Peptidase_M20                                                                            | 2.20E-22  |
| 2572232618 | t3m_00974 | EC:3.5.1.-     | Hydrolases. Acting on carbon-nitrogen bonds, other than peptide bonds. In linear amides. |           |
| 2572232618 | t3m_00974 | TIGR01891      | amidohydrolase                                                                           | 6.80E-107 |
| 2572232618 | t3m_00974 | KO:K01436      | amidohydrolase [EC:3.5.1.-]                                                              | 0.00E+00  |
| 2572232618 | t3m_00974 | Locus_type     | CDS                                                                                      |           |
| 2572232618 | t3m_00974 | Product_name   | amidohydrolase                                                                           |           |
| 2572232618 | t3m_00974 | Scaffold       | t3m_contig_70_156_len_31387_read_count_2567722.19                                        |           |
| 2572232618 | t3m_00974 | Coordinates    | 1046..2242(-)                                                                            |           |
| 2572232618 | t3m_00974 | DNA_length     | 1197bp                                                                                   |           |
| 2572232618 | t3m_00974 | Protein_length | 398aa                                                                                    |           |
| 2572232618 | t3m_00974 | GC             |                                                                                          | 0.7       |
| 2572232619 | t3m_00975 | COG_category   | [R] General function prediction only                                                     |           |
| 2572232619 | t3m_00975 | COG1011        | Predicted hydrolase (HAD superfamily)                                                    | 1.00E-29  |
| 2572232619 | t3m_00975 | pfam13419      | HAD_2                                                                                    | 2.00E-26  |
| 2572232619 | t3m_00975 | TIGR01509      | haloacid dehalogenase superfamily, subfamily IA, variant 3 with third m                  | 5.70E-14  |
| 2572232619 | t3m_00975 | TIGR01549      | haloacid dehalogenase superfamily, subfamily IA, variant 1 with third m                  | 1.30E-17  |
| 2572232619 | t3m_00975 | KO:K07025      | putative hydrolase of the HAD superfamily                                                | 2.70E-44  |
| 2572232619 | t3m_00975 | Locus_type     | CDS                                                                                      |           |
| 2572232619 | t3m_00975 | Product_name   | haloacid dehalogenase superfamily, subfamily IA, variant 3 with third mc                 |           |
| 2572232619 | t3m_00975 | Scaffold       | t3m_contig_70_156_len_31387_read_count_2567722.19                                        |           |
| 2572232619 | t3m_00975 | Coordinates    | 2288..3061(-)                                                                            |           |
| 2572232619 | t3m_00975 | DNA_length     | 774bp                                                                                    |           |

|            |           |                |                                                                  |          |
|------------|-----------|----------------|------------------------------------------------------------------|----------|
| 2572232619 | t3m_00975 | Protein_length | 257aa                                                            |          |
| 2572232619 | t3m_00975 | GC             |                                                                  | 0.67     |
| 2572232620 | t3m_00976 | Locus_type     | CDS                                                              |          |
| 2572232620 | t3m_00976 | Product_name   | hypothetical protein                                             |          |
| 2572232620 | t3m_00976 | Scaffold       | t3m_contig_70_156_len_31387_read_count_2567722.19                |          |
| 2572232620 | t3m_00976 | Coordinates    | 4241..4807(-)                                                    |          |
| 2572232620 | t3m_00976 | DNA_length     | 567bp                                                            |          |
| 2572232620 | t3m_00976 | Protein_length | 188aa                                                            |          |
| 2572232620 | t3m_00976 | GC             |                                                                  | 0.64     |
| 2572232620 | t3m_00976 | Transmembrane  | Yes                                                              |          |
| 2572232621 | t3m_00977 | Locus_type     | CDS                                                              |          |
| 2572232621 | t3m_00977 | Product_name   | hypothetical protein                                             |          |
| 2572232621 | t3m_00977 | Scaffold       | t3m_contig_70_156_len_31387_read_count_2567722.19                |          |
| 2572232621 | t3m_00977 | Coordinates    | 5021..5758(-)                                                    |          |
| 2572232621 | t3m_00977 | DNA_length     | 738bp                                                            |          |
| 2572232621 | t3m_00977 | Protein_length | 245aa                                                            |          |
| 2572232621 | t3m_00977 | GC             |                                                                  | 0.64     |
| 2572232621 | t3m_00977 | Transmembrane  | Yes                                                              |          |
| 2572232622 | t3m_00978 | Locus_type     | CDS                                                              |          |
| 2572232622 | t3m_00978 | Product_name   | hypothetical protein                                             |          |
| 2572232622 | t3m_00978 | Scaffold       | t3m_contig_70_156_len_31387_read_count_2567722.19                |          |
| 2572232622 | t3m_00978 | Coordinates    | 6168..6809(-)                                                    |          |
| 2572232622 | t3m_00978 | DNA_length     | 642bp                                                            |          |
| 2572232622 | t3m_00978 | Protein_length | 213aa                                                            |          |
| 2572232622 | t3m_00978 | GC             |                                                                  | 0.62     |
| 2572232623 | t3m_00979 | COG_category   | [R] General function prediction only                             |          |
| 2572232623 | t3m_00979 | COG_category   | [C] Energy production and conversion                             |          |
| 2572232623 | t3m_00979 | COG0604        | NADPH:quinone reductase and related Zn-dependent oxidoreductases | 5.00E-60 |
| 2572232623 | t3m_00979 | pfam13602      | ADH_zinc_N_2                                                     | 2.40E-27 |
| 2572232623 | t3m_00979 | pfam08240      | ADH_N                                                            | 1.00E-07 |

|            |           |                |                |                                                                  |          |
|------------|-----------|----------------|----------------|------------------------------------------------------------------|----------|
| 2572232623 | t3m_00979 | Locus_type     |                | CDS                                                              |          |
| 2572232623 | t3m_00979 | Product_name   |                | NADPH:quinone reductase and related Zn-dependent oxidoreductases |          |
| 2572232623 | t3m_00979 | Scaffold       |                | t3m_contig_70_156_len_31387_read_count_2567722.19                |          |
| 2572232623 | t3m_00979 | Coordinates    |                | 6860..7822(-)                                                    |          |
| 2572232623 | t3m_00979 | DNA_length     |                | 963bp                                                            |          |
| 2572232623 | t3m_00979 | Protein_length |                | 320aa                                                            |          |
| 2572232623 | t3m_00979 | GC             |                |                                                                  | 0.6      |
|            |           |                |                |                                                                  |          |
| 2572232624 | t3m_00980 | Locus_type     |                | CDS                                                              |          |
| 2572232624 | t3m_00980 | Product_name   |                | hypothetical protein                                             |          |
| 2572232624 | t3m_00980 | Scaffold       |                | t3m_contig_70_156_len_31387_read_count_2567722.19                |          |
| 2572232624 | t3m_00980 | Coordinates    |                | 8151..8360(+)                                                    |          |
| 2572232624 | t3m_00980 | DNA_length     |                | 210bp                                                            |          |
| 2572232624 | t3m_00980 | Protein_length |                | 69aa                                                             |          |
| 2572232624 | t3m_00980 | GC             |                |                                                                  | 0.61     |
| 2572232624 | t3m_00980 | Transmembrane  |                | Yes                                                              |          |
|            |           |                |                |                                                                  |          |
| 2572232625 | t3m_00981 | pfam01548      | DEDD_Tnp_IS110 |                                                                  | 5.50E-11 |
| 2572232625 | t3m_00981 | Locus_type     |                | CDS                                                              |          |
| 2572232625 | t3m_00981 | Product_name   |                | Transposase                                                      |          |
| 2572232625 | t3m_00981 | Scaffold       |                | t3m_contig_70_156_len_31387_read_count_2567722.19                |          |
| 2572232625 | t3m_00981 | Coordinates    |                | 8517..8789(+)                                                    |          |
| 2572232625 | t3m_00981 | DNA_length     |                | 273bp                                                            |          |
| 2572232625 | t3m_00981 | Protein_length |                | 90aa                                                             |          |
| 2572232625 | t3m_00981 | GC             |                |                                                                  | 0.63     |
|            |           |                |                |                                                                  |          |
| 2572232626 | t3m_00982 | pfam02371      | Transposase_20 |                                                                  | 2.40E-21 |
| 2572232626 | t3m_00982 | Locus_type     |                | CDS                                                              |          |
| 2572232626 | t3m_00982 | Product_name   |                | Transposase IS116/IS110/IS902 family                             |          |
| 2572232626 | t3m_00982 | Scaffold       |                | t3m_contig_70_156_len_31387_read_count_2567722.19                |          |
| 2572232626 | t3m_00982 | Coordinates    |                | 8802..9551(+)                                                    |          |
| 2572232626 | t3m_00982 | DNA_length     |                | 750bp                                                            |          |
| 2572232626 | t3m_00982 | Protein_length |                | 249aa                                                            |          |
| 2572232626 | t3m_00982 | GC             |                |                                                                  | 0.63     |

|            |           |                |                                                                            |                                                   |           |
|------------|-----------|----------------|----------------------------------------------------------------------------|---------------------------------------------------|-----------|
| 2572232627 | t3m_00983 | pfam13673      | Acetyltransf_10                                                            |                                                   | 3.90E-12  |
| 2572232627 | t3m_00983 | Locus_type     |                                                                            | CDS                                               |           |
| 2572232627 | t3m_00983 | Product_name   |                                                                            | Acetyltransferase (GNAT) domain                   |           |
| 2572232627 | t3m_00983 | Scaffold       |                                                                            | t3m_contig_70_156_len_31387_read_count_2567722.19 |           |
| 2572232627 | t3m_00983 | Coordinates    |                                                                            | 9769..10551(-)                                    |           |
| 2572232627 | t3m_00983 | DNA_length     |                                                                            | 783bp                                             |           |
| 2572232627 | t3m_00983 | Protein_length |                                                                            | 260aa                                             |           |
| 2572232627 | t3m_00983 | GC             |                                                                            |                                                   | 0.65      |
|            |           |                |                                                                            |                                                   |           |
| 2572232628 | t3m_00984 | Locus_type     |                                                                            | CDS                                               |           |
| 2572232628 | t3m_00984 | Product_name   |                                                                            | hypothetical protein                              |           |
| 2572232628 | t3m_00984 | Scaffold       |                                                                            | t3m_contig_70_156_len_31387_read_count_2567722.19 |           |
| 2572232628 | t3m_00984 | Coordinates    |                                                                            | 10703..10924(-)                                   |           |
| 2572232628 | t3m_00984 | DNA_length     |                                                                            | 222bp                                             |           |
| 2572232628 | t3m_00984 | Protein_length |                                                                            | 73aa                                              |           |
| 2572232628 | t3m_00984 | GC             |                                                                            |                                                   | 0.64      |
| 2572232628 | t3m_00984 | Transmembrane  |                                                                            | Yes                                               |           |
|            |           |                |                                                                            |                                                   |           |
| 2572232629 | t3m_00985 | COG_category   | [E] Amino acid transport and metabolism                                    |                                                   |           |
| 2572232629 | t3m_00985 | COG0308        | Aminopeptidase N                                                           |                                                   | 1.00E-108 |
| 2572232629 | t3m_00985 | pfam11838      | ERAP1_C                                                                    |                                                   | 2.20E-27  |
| 2572232629 | t3m_00985 | pfam01433      | Peptidase_M1                                                               |                                                   | 2.70E-86  |
| 2572232629 | t3m_00985 | EC:3.4.11.-    | Hydrolases. Acting on peptide bonds (peptide hydrolases). Aminopeptidases. |                                                   |           |
| 2572232629 | t3m_00985 | KO:K13722      | tricorn protease interacting factor F2/3 [EC:3.4.11.-]                     |                                                   | 0.00E+00  |
| 2572232629 | t3m_00985 | Locus_type     |                                                                            | CDS                                               |           |
| 2572232629 | t3m_00985 | Product_name   |                                                                            | Aminopeptidase N                                  |           |
| 2572232629 | t3m_00985 | Scaffold       |                                                                            | t3m_contig_70_156_len_31387_read_count_2567722.19 |           |
| 2572232629 | t3m_00985 | Coordinates    |                                                                            | 11009..13423(-)                                   |           |
| 2572232629 | t3m_00985 | DNA_length     |                                                                            | 2415bp                                            |           |
| 2572232629 | t3m_00985 | Protein_length |                                                                            | 804aa                                             |           |
| 2572232629 | t3m_00985 | GC             |                                                                            |                                                   | 0.66      |
|            |           |                |                                                                            |                                                   |           |
| 2572232630 | t3m_00986 | Locus_type     |                                                                            | CDS                                               |           |

|            |           |                |                                                       |          |
|------------|-----------|----------------|-------------------------------------------------------|----------|
| 2572232630 | t3m_00986 | Product_name   | hypothetical protein                                  |          |
| 2572232630 | t3m_00986 | Scaffold       | t3m_contig_70_156_len_31387_read_count_2567722.19     |          |
| 2572232630 | t3m_00986 | Coordinates    | 13444..13584(+)                                       |          |
| 2572232630 | t3m_00986 | DNA_length     | 141bp                                                 |          |
| 2572232630 | t3m_00986 | Protein_length | 46aa                                                  |          |
| 2572232630 | t3m_00986 | GC             |                                                       | 0.67     |
| 2572232631 | t3m_00987 | pfam02010      | REJ                                                   | 2.70E-05 |
| 2572232631 | t3m_00987 | Locus_type     | CDS                                                   |          |
| 2572232631 | t3m_00987 | Product_name   | REJ domain                                            |          |
| 2572232631 | t3m_00987 | Scaffold       | t3m_contig_70_156_len_31387_read_count_2567722.19     |          |
| 2572232631 | t3m_00987 | Coordinates    | 13842..20969(+)                                       |          |
| 2572232631 | t3m_00987 | DNA_length     | 7128bp                                                |          |
| 2572232631 | t3m_00987 | Protein_length | 2375aa                                                |          |
| 2572232631 | t3m_00987 | GC             |                                                       | 0.67     |
| 2572232631 | t3m_00987 | Signal_peptide | Yes                                                   |          |
| 2572232631 | t3m_00987 | Transmembrane  | Yes                                                   |          |
| 2572232632 | t3m_00988 | KEGG_module    | M00248: Putative antibiotic transport system          |          |
| 2572232632 | t3m_00988 | pfam01061      | ABC2_membrane                                         | 1.90E-17 |
| 2572232632 | t3m_00988 | KO:K09686      | antibiotic transport system permease protein          | 0.00E+00 |
| 2572232632 | t3m_00988 | Locus_type     | CDS                                                   |          |
| 2572232632 | t3m_00988 | Product_name   | ABC-2 type transporter                                |          |
| 2572232632 | t3m_00988 | Scaffold       | t3m_contig_70_156_len_31387_read_count_2567722.19     |          |
| 2572232632 | t3m_00988 | Coordinates    | 21033..21800(-)                                       |          |
| 2572232632 | t3m_00988 | DNA_length     | 768bp                                                 |          |
| 2572232632 | t3m_00988 | Protein_length | 255aa                                                 |          |
| 2572232632 | t3m_00988 | GC             |                                                       | 0.64     |
| 2572232632 | t3m_00988 | Transmembrane  | Yes                                                   |          |
| 2572232633 | t3m_00989 | KEGG_module    | M00254: ABC-2 type transport system                   |          |
| 2572232633 | t3m_00989 | COG_category   | [V] Defense mechanisms                                |          |
| 2572232633 | t3m_00989 | COG1131        | ABC-type multidrug transport system, ATPase component | 2.00E-69 |
| 2572232633 | t3m_00989 | pfam00005      | ABC_tran                                              | 1.00E-31 |

|            |           |                |                                                                           |          |
|------------|-----------|----------------|---------------------------------------------------------------------------|----------|
| 2572232633 | t3m_00989 | KO:K01990      | ABC-2 type transport system ATP-binding protein                           | 0.00E+00 |
| 2572232633 | t3m_00989 | Locus_type     | CDS                                                                       |          |
| 2572232633 | t3m_00989 | Product_name   | ABC-type multidrug transport system, ATPase component                     |          |
| 2572232633 | t3m_00989 | Scaffold       | t3m_contig_70_156_len_31387_read_count_2567722.19                         |          |
| 2572232633 | t3m_00989 | Coordinates    | 21787..22782(-)                                                           |          |
| 2572232633 | t3m_00989 | DNA_length     | 996bp                                                                     |          |
| 2572232633 | t3m_00989 | Protein_length | 331aa                                                                     |          |
| 2572232633 | t3m_00989 | GC             |                                                                           | 0.66     |
| 2572232634 | t3m_00990 | pfam00583      | Acetyltransf_1                                                            | 1.70E-14 |
| 2572232634 | t3m_00990 | Locus_type     | CDS                                                                       |          |
| 2572232634 | t3m_00990 | Product_name   | Acetyltransferase (GNAT) family                                           |          |
| 2572232634 | t3m_00990 | Scaffold       | t3m_contig_70_156_len_31387_read_count_2567722.19                         |          |
| 2572232634 | t3m_00990 | Coordinates    | 22960..23403(-)                                                           |          |
| 2572232634 | t3m_00990 | DNA_length     | 444bp                                                                     |          |
| 2572232634 | t3m_00990 | Protein_length | 147aa                                                                     |          |
| 2572232634 | t3m_00990 | GC             |                                                                           | 0.65     |
| 2572232635 | t3m_00991 | COG_category   | [G] Carbohydrate transport and metabolism                                 |          |
| 2572232635 | t3m_00991 | COG0580        | Glycerol uptake facilitator and related permeases (Major Intrinsic Protei | 3.00E-33 |
| 2572232635 | t3m_00991 | pfam00230      | MIP                                                                       | 8.20E-46 |
| 2572232635 | t3m_00991 | TIGR00861      | MIP family channel proteins                                               | 1.60E-48 |
| 2572232635 | t3m_00991 | KO:K06188      | aquaporin Z                                                               | 0.00E+00 |
| 2572232635 | t3m_00991 | Locus_type     | CDS                                                                       |          |
| 2572232635 | t3m_00991 | Product_name   | Glycerol uptake facilitator and related permeases (Major Intrinsic Protei |          |
| 2572232635 | t3m_00991 | Scaffold       | t3m_contig_70_156_len_31387_read_count_2567722.19                         |          |
| 2572232635 | t3m_00991 | Coordinates    | 23779..24675(+)                                                           |          |
| 2572232635 | t3m_00991 | DNA_length     | 897bp                                                                     |          |
| 2572232635 | t3m_00991 | Protein_length | 298aa                                                                     |          |
| 2572232635 | t3m_00991 | GC             |                                                                           | 0.68     |
| 2572232635 | t3m_00991 | Transmembrane  | Yes                                                                       |          |
| 2572232636 | t3m_00992 | COG_category   | [S] Function unknown                                                      |          |
| 2572232636 | t3m_00992 | COG2326        | Uncharacterized conserved protein                                         | 3.00E-67 |

|            |           |                |                                                                  |  |           |
|------------|-----------|----------------|------------------------------------------------------------------|--|-----------|
| 2572232636 | t3m_00992 | pfam03976      | PPK2                                                             |  | 2.20E-75  |
| 2572232636 | t3m_00992 | TIGR03709      | polyphosphate:nucleotide phosphotransferase, PPK2 family         |  | 3.70E-114 |
| 2572232636 | t3m_00992 | Locus_type     | CDS                                                              |  |           |
| 2572232636 | t3m_00992 | Product_name   | Polyphosphate:AMP phosphotransferase (EC 2.7.4.-)                |  |           |
| 2572232636 | t3m_00992 | Scaffold       | t3m_contig_70_156_len_31387_read_count_2567722.19                |  |           |
| 2572232636 | t3m_00992 | Coordinates    | 24672..25487(+)                                                  |  |           |
| 2572232636 | t3m_00992 | DNA_length     | 816bp                                                            |  |           |
| 2572232636 | t3m_00992 | Protein_length | 271aa                                                            |  |           |
| 2572232636 | t3m_00992 | GC             |                                                                  |  | 0.65      |
| 2572232637 | t3m_00993 | Locus_type     | CDS                                                              |  |           |
| 2572232637 | t3m_00993 | Product_name   | hypothetical protein                                             |  |           |
| 2572232637 | t3m_00993 | Scaffold       | t3m_contig_70_156_len_31387_read_count_2567722.19                |  |           |
| 2572232637 | t3m_00993 | Coordinates    | 25830..27041(-)                                                  |  |           |
| 2572232637 | t3m_00993 | DNA_length     | 1212bp                                                           |  |           |
| 2572232637 | t3m_00993 | Protein_length | 403aa                                                            |  |           |
| 2572232637 | t3m_00993 | GC             |                                                                  |  | 0.66      |
| 2572232638 | t3m_00994 | pfam04967      | HTH_10                                                           |  | 1.40E-11  |
| 2572232638 | t3m_00994 | Locus_type     | CDS                                                              |  |           |
| 2572232638 | t3m_00994 | Product_name   | HTH DNA binding domain                                           |  |           |
| 2572232638 | t3m_00994 | Scaffold       | t3m_contig_70_156_len_31387_read_count_2567722.19                |  |           |
| 2572232638 | t3m_00994 | Coordinates    | 27127..27753(-)                                                  |  |           |
| 2572232638 | t3m_00994 | DNA_length     | 627bp                                                            |  |           |
| 2572232638 | t3m_00994 | Protein_length | 208aa                                                            |  |           |
| 2572232638 | t3m_00994 | GC             |                                                                  |  | 0.59      |
| 2572232639 | t3m_00995 | COG_category   | [O] Posttranslational modification, protein turnover, chaperones |  |           |
| 2572232639 | t3m_00995 | COG0443        | Molecular chaperone                                              |  | 0.00E+00  |
| 2572232639 | t3m_00995 | pfam00012      | HSP70                                                            |  | 0.00E+00  |
| 2572232639 | t3m_00995 | pfam00012      | HSP70                                                            |  | 6.50E-11  |
| 2572232639 | t3m_00995 | TIGR02350      | chaperone protein DnaK                                           |  | 0.00E+00  |
| 2572232639 | t3m_00995 | KO:K04043      | molecular chaperone DnaK                                         |  | 0.00E+00  |
| 2572232639 | t3m_00995 | Locus_type     | CDS                                                              |  |           |



|            |           |                |                                                                               |           |
|------------|-----------|----------------|-------------------------------------------------------------------------------|-----------|
| 2572232639 | t3m_00995 | Product_name   | chaperone protein DnaK                                                        |           |
| 2572232639 | t3m_00995 | Scaffold       | t3m_contig_70_156_len_31387_read_count_2567722.19                             |           |
| 2572232639 | t3m_00995 | Coordinates    | 28285..30135(+)                                                               |           |
| 2572232639 | t3m_00995 | DNA_length     | 1851bp                                                                        |           |
| 2572232639 | t3m_00995 | Protein_length | 616aa                                                                         |           |
| 2572232639 | t3m_00995 | GC             |                                                                               | 0.67      |
|            |           |                |                                                                               |           |
| 2572232640 | t3m_00996 | KEGG_module    | M00012: Glyoxylate cycle                                                      |           |
| 2572232640 | t3m_00996 | KEGG_module    | M00010: Citrate cycle, first carbon oxidation, oxaloacetate => 2-oxoglutarate |           |
| 2572232640 | t3m_00996 | KEGG_module    | M00009: Citrate cycle (TCA cycle, Krebs cycle)                                |           |
| 2572232640 | t3m_00996 | Metacyc        | PWY-5913: TCA cycle VI (obligate autotrophs)                                  |           |
| 2572232640 | t3m_00996 | Metacyc        | REDCITCYC: TCA cycle III (helicobacter)                                       |           |
| 2572232640 | t3m_00996 | Metacyc        | P105-PWY: TCA cycle IV (2-oxoglutarate decarboxylase)                         |           |
| 2572232640 | t3m_00996 | Metacyc        | ANARESP1-PWY: respiration (anaerobic)                                         |           |
| 2572232640 | t3m_00996 | Metacyc        | PWY-6549: glutamine biosynthesis III                                          |           |
| 2572232640 | t3m_00996 | Metacyc        | PWY-5690: TCA cycle II (eukaryotic)                                           |           |
| 2572232640 | t3m_00996 | Metacyc        | PWY-5750: itaconate biosynthesis                                              |           |
| 2572232640 | t3m_00996 | Metacyc        | FERMENTATION-PWY: mixed acid fermentation                                     |           |
| 2572232640 | t3m_00996 | Metacyc        | TCA: TCA cycle I (prokaryotic)                                                |           |
| 2572232640 | t3m_00996 | Metacyc        | PWY-6728: methylaspartate cycle                                               |           |
| 2572232640 | t3m_00996 | Metacyc        | GLYOXYLATE-BYPASS: glyoxylate cycle                                           |           |
| 2572232640 | t3m_00996 | Metacyc        | PWY-7124: ethylene biosynthesis V                                             |           |
| 2572232640 | t3m_00996 | Metacyc        | PWY-6969: TCA cycle V (2-oxoglutarate:ferredoxin oxidoreductase)              |           |
| 2572232640 | t3m_00996 | COG_category   | [C] Energy production and conversion                                          |           |
| 2572232640 | t3m_00996 | COG0372        | Citrate synthase                                                              | 2.00E-86  |
| 2572232640 | t3m_00996 | pfam00285      | Citrate_synt                                                                  | 9.90E-104 |
| 2572232640 | t3m_00996 | EC:2.3.3.1     | Citrate (Si)-synthase.                                                        |           |
| 2572232640 | t3m_00996 | KO:K01647      | citrate synthase [EC:2.3.3.1]                                                 | 0.00E+00  |
| 2572232640 | t3m_00996 | Locus_type     | CDS                                                                           |           |
| 2572232640 | t3m_00996 | Product_name   | Citrate synthase                                                              |           |
| 2572232640 | t3m_00996 | Scaffold       | t3m_contig_70_156_len_31387_read_count_2567722.19                             |           |
| 2572232640 | t3m_00996 | Coordinates    | 30148..31275(-)                                                               |           |
| 2572232640 | t3m_00996 | DNA_length     | 1128bp                                                                        |           |
| 2572232640 | t3m_00996 | Protein_length | 375aa                                                                         |           |

|            |           |                |                                                 |                                                   |          |
|------------|-----------|----------------|-------------------------------------------------|---------------------------------------------------|----------|
| 2572232640 | t3m_00996 | GC             |                                                 |                                                   | 0.72     |
| 2572232641 | t3m_00997 | pfam08241      | Methyltransf_11                                 |                                                   | 6.20E-23 |
| 2572232641 | t3m_00997 | Locus_type     |                                                 | CDS                                               |          |
| 2572232641 | t3m_00997 | Product_name   |                                                 | Methyltransferase domain                          |          |
| 2572232641 | t3m_00997 | Scaffold       |                                                 | t3m_contig_70_157_len_31137_read_count_2595890.20 |          |
| 2572232641 | t3m_00997 | Coordinates    |                                                 | 807..1430(+)                                      |          |
| 2572232641 | t3m_00997 | DNA_length     |                                                 | 624bp                                             |          |
| 2572232641 | t3m_00997 | Protein_length |                                                 | 207aa                                             |          |
| 2572232641 | t3m_00997 | GC             |                                                 |                                                   | 0.65     |
| 2572232642 | t3m_00998 | KEGG_module    | M00264: DNA polymerase II complex, archaea      |                                                   |          |
| 2572232642 | t3m_00998 | COG_category   | [L] Replication, recombination and repair       |                                                   |          |
| 2572232642 | t3m_00998 | COG1933        | Archaeal DNA polymerase II, large subunit       |                                                   | 9.00E-80 |
| 2572232642 | t3m_00998 | pfam03833      | PolC_DP2                                        |                                                   | 0.00E+00 |
| 2572232642 | t3m_00998 | EC:2.7.7.7     | DNA-directed DNA polymerase.                    |                                                   |          |
| 2572232642 | t3m_00998 | TIGR00354      | DNA polymerase, archaeal type II, large subunit |                                                   | 0.00E+00 |
| 2572232642 | t3m_00998 | KO:K02322      | DNA polymerase II large subunit [EC:2.7.7.7]    |                                                   | 0.00E+00 |
| 2572232642 | t3m_00998 | ITERM:00108    | DNA polymerase II large subunit (EC 2.7.7.7)    |                                                   |          |
| 2572232642 | t3m_00998 | Locus_type     |                                                 | CDS                                               |          |
| 2572232642 | t3m_00998 | Product_name   |                                                 | DNA polymerase II large subunit (EC 2.7.7.7)      |          |
| 2572232642 | t3m_00998 | Scaffold       |                                                 | t3m_contig_70_157_len_31137_read_count_2595890.20 |          |
| 2572232642 | t3m_00998 | Coordinates    |                                                 | 1539..4943(+)                                     |          |
| 2572232642 | t3m_00998 | DNA_length     |                                                 | 3405bp                                            |          |
| 2572232642 | t3m_00998 | Protein_length |                                                 | 1134aa                                            |          |
| 2572232642 | t3m_00998 | GC             |                                                 |                                                   | 0.69     |
| 2572232643 | t3m_00999 | Locus_type     |                                                 | CDS                                               |          |
| 2572232643 | t3m_00999 | Product_name   |                                                 | hypothetical protein                              |          |
| 2572232643 | t3m_00999 | Scaffold       |                                                 | t3m_contig_70_157_len_31137_read_count_2595890.20 |          |
| 2572232643 | t3m_00999 | Coordinates    |                                                 | 5088..5393(-)                                     |          |
| 2572232643 | t3m_00999 | DNA_length     |                                                 | 306bp                                             |          |
| 2572232643 | t3m_00999 | Protein_length |                                                 | 101aa                                             |          |
| 2572232643 | t3m_00999 | GC             |                                                 |                                                   | 0.7      |

|            |           |                |                                                                         |           |
|------------|-----------|----------------|-------------------------------------------------------------------------|-----------|
| 2572232644 | t3m_01000 | Locus_type     | CDS                                                                     |           |
| 2572232644 | t3m_01000 | Product_name   | hypothetical protein                                                    |           |
| 2572232644 | t3m_01000 | Scaffold       | t3m_contig_70_157_len_31137_read_count_2595890.20                       |           |
| 2572232644 | t3m_01000 | Coordinates    | 5390..5911(-)                                                           |           |
| 2572232644 | t3m_01000 | DNA_length     | 522bp                                                                   |           |
| 2572232644 | t3m_01000 | Protein_length | 173aa                                                                   |           |
| 2572232644 | t3m_01000 | GC             |                                                                         | 0.66      |
| 2572232645 | t3m_01001 | KEGG_module    | M00048: Inosine monophosphate biosynthesis, PRPP + glutamine => IMP     |           |
| 2572232645 | t3m_01001 | Metacyc        | PWY-6720: toyocamycin biosynthesis                                      |           |
| 2572232645 | t3m_01001 | COG_category   | [R] General function prediction only                                    |           |
| 2572232645 | t3m_01001 | COG1759        | ATP-utilizing enzymes of ATP-grasp superfamily (probably carboligases)  | 1.00E-110 |
| 2572232645 | t3m_01001 | pfam06849      | DUF1246                                                                 | 4.70E-34  |
| 2572232645 | t3m_01001 | pfam06973      | DUF1297                                                                 | 2.30E-70  |
| 2572232645 | t3m_01001 | EC:6.3.4.-     | Ligases. Forming carbon-nitrogen bonds. Other carbon--nitrogen ligases. |           |
| 2572232645 | t3m_01001 | KO:K06863      | 5-formaminoimidazole-4-carboxamide-1-(beta)-D-ribofuranosyl 5'-mon      | 0.00E+00  |
| 2572232645 | t3m_01001 | Locus_type     | CDS                                                                     |           |
| 2572232645 | t3m_01001 | Product_name   | ATP-utilizing enzymes of ATP-grasp superfamily (probably carboligases)  |           |
| 2572232645 | t3m_01001 | Scaffold       | t3m_contig_70_157_len_31137_read_count_2595890.20                       |           |
| 2572232645 | t3m_01001 | Coordinates    | 6139..7296(+)                                                           |           |
| 2572232645 | t3m_01001 | DNA_length     | 1158bp                                                                  |           |
| 2572232645 | t3m_01001 | Protein_length | 385aa                                                                   |           |
| 2572232645 | t3m_01001 | GC             |                                                                         | 0.68      |
| 2572232646 | t3m_01002 | Metacyc        | GLYCLEAV-PWY: glycine cleavage                                          |           |
| 2572232646 | t3m_01002 | COG_category   | [E] Amino acid transport and metabolism                                 |           |
| 2572232646 | t3m_01002 | COG0404        | Glycine cleavage system T protein (aminomethyltransferase)              | 9.00E-91  |
| 2572232646 | t3m_01002 | pfam01571      | GCV_T                                                                   | 2.30E-57  |
| 2572232646 | t3m_01002 | pfam08669      | GCV_T_C                                                                 | 3.90E-23  |
| 2572232646 | t3m_01002 | EC:2.1.2.10    | Aminomethyltransferase.                                                 |           |
| 2572232646 | t3m_01002 | TIGR00528      | glycine cleavage system T protein                                       | 2.20E-92  |
| 2572232646 | t3m_01002 | KO:K00605      | aminomethyltransferase [EC:2.1.2.10]                                    | 0.00E+00  |
| 2572232646 | t3m_01002 | Locus_type     | CDS                                                                     |           |

|            |           |                |                                                                        |                                                                       |          |
|------------|-----------|----------------|------------------------------------------------------------------------|-----------------------------------------------------------------------|----------|
| 2572232646 | t3m_01002 | Product_name   |                                                                        | glycine cleavage system T protein                                     |          |
| 2572232646 | t3m_01002 | Scaffold       |                                                                        | t3m_contig_70_157_len_31137_read_count_2595890.20                     |          |
| 2572232646 | t3m_01002 | Coordinates    |                                                                        | 7293..8471(+)                                                         |          |
| 2572232646 | t3m_01002 | DNA_length     |                                                                        | 1179bp                                                                |          |
| 2572232646 | t3m_01002 | Protein_length |                                                                        | 392aa                                                                 |          |
| 2572232646 | t3m_01002 | GC             |                                                                        |                                                                       | 0.69     |
|            |           |                |                                                                        |                                                                       |          |
| 2572232647 | t3m_01003 | pfam13191      | AAA_16                                                                 |                                                                       | 1.60E-19 |
| 2572232647 | t3m_01003 | Locus_type     |                                                                        | CDS                                                                   |          |
| 2572232647 | t3m_01003 | Product_name   |                                                                        | AAA ATPase domain                                                     |          |
| 2572232647 | t3m_01003 | Scaffold       |                                                                        | t3m_contig_70_157_len_31137_read_count_2595890.20                     |          |
| 2572232647 | t3m_01003 | Coordinates    |                                                                        | 8506..10887(+)                                                        |          |
| 2572232647 | t3m_01003 | DNA_length     |                                                                        | 2382bp                                                                |          |
| 2572232647 | t3m_01003 | Protein_length |                                                                        | 793aa                                                                 |          |
| 2572232647 | t3m_01003 | GC             |                                                                        |                                                                       | 0.71     |
|            |           |                |                                                                        |                                                                       |          |
| 2572232648 | t3m_01004 | KEGG_module    | M00115: NAD biosynthesis, aspartate => NAD                             |                                                                       |          |
| 2572232648 | t3m_01004 | Metacyc        | PYRIDNUCSYN-PWY: NAD biosynthesis I (from aspartate)                   |                                                                       |          |
| 2572232648 | t3m_01004 | Metacyc        | PWY-5316: nicotine biosynthesis                                        |                                                                       |          |
| 2572232648 | t3m_01004 | Metacyc        | PWY-5653: NAD biosynthesis from 2-amino-3-carboxymuconate semialdehyde |                                                                       |          |
| 2572232648 | t3m_01004 | IMG_pathway    | 212: Deamido-NAD biosynthesis                                          |                                                                       |          |
| 2572232648 | t3m_01004 | COG_category   | [H] Coenzyme transport and metabolism                                  |                                                                       |          |
| 2572232648 | t3m_01004 | COG0157        | Nicotinate-nucleotide pyrophosphorylase                                |                                                                       | 2.00E-63 |
| 2572232648 | t3m_01004 | pfam01729      | QRPTase_C                                                              |                                                                       | 4.20E-42 |
| 2572232648 | t3m_01004 | pfam02749      | QRPTase_N                                                              |                                                                       | 1.50E-20 |
| 2572232648 | t3m_01004 | EC:2.4.2.19    | Nicotinate-nucleotide diphosphorylase (carboxylating).                 |                                                                       |          |
| 2572232648 | t3m_01004 | TIGR00078      | nicotinate-nucleotide pyrophosphorylase                                |                                                                       | 2.10E-79 |
| 2572232648 | t3m_01004 | KO:K00767      | nicotinate-nucleotide pyrophosphorylase (carboxylating) [EC:2.4.2.19]  |                                                                       | 0.00E+00 |
| 2572232648 | t3m_01004 | ITERM:00563    | nicotinate-nucleotide pyrophosphorylase [carboxylating] (EC 2.4.2.19)  |                                                                       |          |
| 2572232648 | t3m_01004 | Locus_type     |                                                                        | CDS                                                                   |          |
| 2572232648 | t3m_01004 | Product_name   |                                                                        | nicotinate-nucleotide pyrophosphorylase [carboxylating] (EC 2.4.2.19) |          |
| 2572232648 | t3m_01004 | Scaffold       |                                                                        | t3m_contig_70_157_len_31137_read_count_2595890.20                     |          |
| 2572232648 | t3m_01004 | Coordinates    |                                                                        | 10817..11761(+)                                                       |          |
| 2572232648 | t3m_01004 | DNA_length     |                                                                        | 945bp                                                                 |          |

|            |           |                |                                                      |           |
|------------|-----------|----------------|------------------------------------------------------|-----------|
| 2572232648 | t3m_01004 | Protein_length | 314aa                                                |           |
| 2572232648 | t3m_01004 | GC             |                                                      | 0.73      |
| 2572232649 | t3m_01005 | KEGG_module    | M00115: NAD biosynthesis, aspartate => NAD           |           |
| 2572232649 | t3m_01005 | Metacyc        | PWY-5316: nicotine biosynthesis                      |           |
| 2572232649 | t3m_01005 | Metacyc        | PYRIDNUCSYN-PWY: NAD biosynthesis I (from aspartate) |           |
| 2572232649 | t3m_01005 | IMG_pathway    | 210: Quinolinate biosynthesis via aspartate          |           |
| 2572232649 | t3m_01005 | COG_category   | [H] Coenzyme transport and metabolism                |           |
| 2572232649 | t3m_01005 | COG0379        | Quinolinate synthase                                 | 6.00E-107 |
| 2572232649 | t3m_01005 | pfam02445      | NadA                                                 | 1.10E-113 |
| 2572232649 | t3m_01005 | EC:2.5.1.72    | Quinolinate synthase.                                |           |
| 2572232649 | t3m_01005 | TIGR00550      | quinolinate synthetase complex, A subunit            | 2.00E-100 |
| 2572232649 | t3m_01005 | KO:K03517      | quinolinate synthase [EC:2.5.1.72]                   | 0.00E+00  |
| 2572232649 | t3m_01005 | ITERM:00562    | quinolinate synthetase (EC 2.5.1.72)                 |           |
| 2572232649 | t3m_01005 | Locus_type     | CDS                                                  |           |
| 2572232649 | t3m_01005 | Product_name   | quinolinate synthetase (EC 2.5.1.72)                 |           |
| 2572232649 | t3m_01005 | Scaffold       | t3m_contig_70_157_len_31137_read_count_2595890.20    |           |
| 2572232649 | t3m_01005 | Coordinates    | 11777..12682(+)                                      |           |
| 2572232649 | t3m_01005 | DNA_length     | 906bp                                                |           |
| 2572232649 | t3m_01005 | Protein_length | 301aa                                                |           |
| 2572232649 | t3m_01005 | GC             |                                                      | 0.68      |
| 2572232650 | t3m_01006 | Locus_type     | CDS                                                  |           |
| 2572232650 | t3m_01006 | Product_name   | hypothetical protein                                 |           |
| 2572232650 | t3m_01006 | Scaffold       | t3m_contig_70_157_len_31137_read_count_2595890.20    |           |
| 2572232650 | t3m_01006 | Coordinates    | 12692..13057(-)                                      |           |
| 2572232650 | t3m_01006 | DNA_length     | 366bp                                                |           |
| 2572232650 | t3m_01006 | Protein_length | 121aa                                                |           |
| 2572232650 | t3m_01006 | GC             |                                                      | 0.68      |
| 2572232650 | t3m_01006 | Transmembrane  | Yes                                                  |           |
| 2572232651 | t3m_01007 | COG_category   | [L] Replication, recombination and repair            |           |
| 2572232651 | t3m_01007 | COG1796        | DNA polymerase IV (family X)                         | 6.00E-87  |
| 2572232651 | t3m_01007 | pfam14792      | DNA_pol_B_palm                                       | 1.40E-05  |

|            |           |                |                                                   |          |
|------------|-----------|----------------|---------------------------------------------------|----------|
| 2572232651 | t3m_01007 | pfam14716      | HHH_8                                             | 4.00E-18 |
| 2572232651 | t3m_01007 | pfam14520      | HHH_5                                             | 2.20E-07 |
| 2572232651 | t3m_01007 | pfam14791      | DNA_pol_B_thumb                                   | 1.60E-25 |
| 2572232651 | t3m_01007 | KO:K02347      | DNA polymerase (family X)                         | 0.00E+00 |
| 2572232651 | t3m_01007 | Locus_type     | CDS                                               |          |
| 2572232651 | t3m_01007 | Product_name   | DNA polymerase IV (family X)                      |          |
| 2572232651 | t3m_01007 | Scaffold       | t3m_contig_70_157_len_31137_read_count_2595890.20 |          |
| 2572232651 | t3m_01007 | Coordinates    | 13430..15151(-)                                   |          |
| 2572232651 | t3m_01007 | DNA_length     | 1722bp                                            |          |
| 2572232651 | t3m_01007 | Protein_length | 573aa                                             |          |
| 2572232651 | t3m_01007 | GC             |                                                   | 0.72     |
| 2572232652 | t3m_01008 | pfam00583      | Acetyltransf_1                                    | 1.20E-15 |
| 2572232652 | t3m_01008 | Locus_type     | CDS                                               |          |
| 2572232652 | t3m_01008 | Product_name   | Acetyltransferase (GNAT) family                   |          |
| 2572232652 | t3m_01008 | Scaffold       | t3m_contig_70_157_len_31137_read_count_2595890.20 |          |
| 2572232652 | t3m_01008 | Coordinates    | 15207..15998(-)                                   |          |
| 2572232652 | t3m_01008 | DNA_length     | 792bp                                             |          |
| 2572232652 | t3m_01008 | Protein_length | 263aa                                             |          |
| 2572232652 | t3m_01008 | GC             |                                                   | 0.7      |
| 2572232653 | t3m_01009 | pfam09674      | DUF2400                                           | 7.00E-46 |
| 2572232653 | t3m_01009 | TIGR02757      | TIGR02757 family protein                          | 6.40E-43 |
| 2572232653 | t3m_01009 | Locus_type     | CDS                                               |          |
| 2572232653 | t3m_01009 | Product_name   | Protein of unknown function (DUF2400)             |          |
| 2572232653 | t3m_01009 | Scaffold       | t3m_contig_70_157_len_31137_read_count_2595890.20 |          |
| 2572232653 | t3m_01009 | Coordinates    | 16099..16986(+)                                   |          |
| 2572232653 | t3m_01009 | DNA_length     | 888bp                                             |          |
| 2572232653 | t3m_01009 | Protein_length | 295aa                                             |          |
| 2572232653 | t3m_01009 | GC             |                                                   | 0.7      |
| 2572232654 | t3m_01010 | Locus_type     | CDS                                               |          |
| 2572232654 | t3m_01010 | Product_name   | hypothetical protein                              |          |
| 2572232654 | t3m_01010 | Scaffold       | t3m_contig_70_157_len_31137_read_count_2595890.20 |          |

|            |           |                |                                                                                                 |          |
|------------|-----------|----------------|-------------------------------------------------------------------------------------------------|----------|
| 2572232654 | t3m_01010 | Coordinates    | 16983..17390(+)                                                                                 |          |
| 2572232654 | t3m_01010 | DNA_length     | 408bp                                                                                           |          |
| 2572232654 | t3m_01010 | Protein_length | 135aa                                                                                           |          |
| 2572232654 | t3m_01010 | GC             |                                                                                                 | 0.74     |
| 2572232655 | t3m_01011 | COG_category   | [K] Transcription                                                                               |          |
| 2572232655 | t3m_01011 | COG1846        | Transcriptional regulators                                                                      | 6.00E-13 |
| 2572232655 | t3m_01011 | pfam01047      | MarR                                                                                            | 6.70E-12 |
| 2572232655 | t3m_01011 | Locus_type     | CDS                                                                                             |          |
| 2572232655 | t3m_01011 | Product_name   | Transcriptional regulators                                                                      |          |
| 2572232655 | t3m_01011 | Scaffold       | t3m_contig_70_157_len_31137_read_count_2595890.20                                               |          |
| 2572232655 | t3m_01011 | Coordinates    | 17447..17935(+)                                                                                 |          |
| 2572232655 | t3m_01011 | DNA_length     | 489bp                                                                                           |          |
| 2572232655 | t3m_01011 | Protein_length | 162aa                                                                                           |          |
| 2572232655 | t3m_01011 | GC             |                                                                                                 | 0.68     |
| 2572232656 | t3m_01012 | pfam07690      | MFS_1                                                                                           | 2.30E-15 |
| 2572232656 | t3m_01012 | pfam07690      | MFS_1                                                                                           | 1.30E-27 |
| 2572232656 | t3m_01012 | Locus_type     | CDS                                                                                             |          |
| 2572232656 | t3m_01012 | Product_name   | Major Facilitator Superfamily                                                                   |          |
| 2572232656 | t3m_01012 | Scaffold       | t3m_contig_70_157_len_31137_read_count_2595890.20                                               |          |
| 2572232656 | t3m_01012 | Coordinates    | 17932..19545(+)                                                                                 |          |
| 2572232656 | t3m_01012 | DNA_length     | 1614bp                                                                                          |          |
| 2572232656 | t3m_01012 | Protein_length | 537aa                                                                                           |          |
| 2572232656 | t3m_01012 | GC             |                                                                                                 | 0.67     |
| 2572232656 | t3m_01012 | Transmembrane  | Yes                                                                                             |          |
| 2572232657 | t3m_01013 | KEGG_module    | M00053: Pyrimidine deoxyribonucleotide biosynthesis, CDP/CTP => dCDP/dCTP,dTDP/dTTP             |          |
| 2572232657 | t3m_01013 | Metacyc        | PWY-7198: pyrimidine deoxyribonucleotides <i>de novo</i> biosynthesis IV                        |          |
| 2572232657 | t3m_01013 | Metacyc        | PWY0-166: superpathway of pyrimidine deoxyribonucleotides <i>de novo</i> biosynthesis (E. coli) |          |
| 2572232657 | t3m_01013 | Metacyc        | PWY-7184: pyrimidine deoxyribonucleotides <i>de novo</i> biosynthesis I                         |          |
| 2572232657 | t3m_01013 | Metacyc        | PWY-6125: guanosine nucleotides <i>de novo</i> biosynthesis                                     |          |
| 2572232657 | t3m_01013 | Metacyc        | PWY-7210: pyrimidine deoxyribonucleotides biosynthesis from CTP                                 |          |
| 2572232657 | t3m_01013 | Metacyc        | PWY-6545: pyrimidine deoxyribonucleotides <i>de novo</i> biosynthesis III                       |          |

|            |           |                |                                                                   |          |
|------------|-----------|----------------|-------------------------------------------------------------------|----------|
| 2572232657 | t3m_01013 | Metacyc        | PWY-6126: adenosine nucleotides <i>de novo</i> biosynthesis       |          |
| 2572232657 | t3m_01013 | COG_category   | [F] Nucleotide transport and metabolism                           |          |
| 2572232657 | t3m_01013 | COG0209        | Ribonucleotide reductase, alpha subunit                           | 3.00E-83 |
| 2572232657 | t3m_01013 | pfam08471      | Ribonuc_red_2_N                                                   | 2.10E-15 |
| 2572232657 | t3m_01013 | pfam00317      | Ribonuc_red_lgN                                                   | 3.20E-05 |
| 2572232657 | t3m_01013 | pfam12637      | TSCPD                                                             | 3.90E-20 |
| 2572232657 | t3m_01013 | pfam02867      | Ribonuc_red_lgC                                                   | 0.00E+00 |
| 2572232657 | t3m_01013 | EC:1.17.4.1    | Ribonucleoside-diphosphate reductase.                             |          |
| 2572232657 | t3m_01013 | TIGR02504      | ribonucleoside-diphosphate reductase, adenosylcobalamin-dependent | 0.00E+00 |
| 2572232657 | t3m_01013 | KO:K00525      | ribonucleoside-diphosphate reductase alpha chain [EC:1.17.4.1]    | 0.00E+00 |
| 2572232657 | t3m_01013 | ITERM:00726    | ribonucleoside-diphosphate reductase class II (EC 1.17.4.-)       |          |
| 2572232657 | t3m_01013 | Locus_type     | CDS                                                               |          |
| 2572232657 | t3m_01013 | Product_name   | ribonucleoside-diphosphate reductase class II (EC 1.17.4.-)       |          |
| 2572232657 | t3m_01013 | Scaffold       | t3m_contig_70_157_len_31137_read_count_2595890.20                 |          |
| 2572232657 | t3m_01013 | Coordinates    | 19570..22359(-)                                                   |          |
| 2572232657 | t3m_01013 | DNA_length     | 2790bp                                                            |          |
| 2572232657 | t3m_01013 | Protein_length | 929aa                                                             |          |
| 2572232657 | t3m_01013 | GC             |                                                                   | 0.68     |
|            |           |                |                                                                   |          |
| 2572232658 | t3m_01014 | Locus_type     | CDS                                                               |          |
| 2572232658 | t3m_01014 | Product_name   | hypothetical protein                                              |          |
| 2572232658 | t3m_01014 | Scaffold       | t3m_contig_70_157_len_31137_read_count_2595890.20                 |          |
| 2572232658 | t3m_01014 | Coordinates    | 22708..23730(+)                                                   |          |
| 2572232658 | t3m_01014 | DNA_length     | 1023bp                                                            |          |
| 2572232658 | t3m_01014 | Protein_length | 340aa                                                             |          |
| 2572232658 | t3m_01014 | GC             |                                                                   | 0.69     |
| 2572232658 | t3m_01014 | Transmembrane  | Yes                                                               |          |
|            |           |                |                                                                   |          |
| 2572232659 | t3m_01015 | Locus_type     | CDS                                                               |          |
| 2572232659 | t3m_01015 | Product_name   | hypothetical protein                                              |          |
| 2572232659 | t3m_01015 | Scaffold       | t3m_contig_70_157_len_31137_read_count_2595890.20                 |          |
| 2572232659 | t3m_01015 | Coordinates    | 23867..24082(-)                                                   |          |
| 2572232659 | t3m_01015 | DNA_length     | 216bp                                                             |          |
| 2572232659 | t3m_01015 | Protein_length | 71aa                                                              |          |



|            |           |                |                                                                               |           |
|------------|-----------|----------------|-------------------------------------------------------------------------------|-----------|
| 2572232659 | t3m_01015 | GC             |                                                                               | 0.54      |
| 2572232660 | t3m_01016 | KEGG_module    | M00045: Histidine degradation, histidine => N-formiminoglutamate => glutamate |           |
| 2572232660 | t3m_01016 | Metacyc        | PWY-5030: histidine degradation III                                           |           |
| 2572232660 | t3m_01016 | Metacyc        | PWY-5028: histidine degradation II                                            |           |
| 2572232660 | t3m_01016 | Metacyc        | HISDEG-PWY: histidine degradation I                                           |           |
| 2572232660 | t3m_01016 | Metacyc        | HISHP-PWY: histidine degradation VI                                           |           |
| 2572232660 | t3m_01016 | IMG_pathway    | 189: L-histidine degradation to L-glutamate and formamide                     |           |
| 2572232660 | t3m_01016 | IMG_pathway    | 190: L-histidine degradation to L-glutamate and formiminotetrahydrofolate     |           |
| 2572232660 | t3m_01016 | COG_category   | [Q] Secondary metabolites biosynthesis, transport and catabolism              |           |
| 2572232660 | t3m_01016 | COG1228        | Imidazolonepropionase and related amidohydrolases                             | 1.00E-67  |
| 2572232660 | t3m_01016 | pfam13147      | Amidohydro_4                                                                  | 1.20E-18  |
| 2572232660 | t3m_01016 | EC:3.5.2.7     | Imidazolonepropionase.                                                        |           |
| 2572232660 | t3m_01016 | TIGR01224      | imidazolonepropionase                                                         | 4.10E-120 |
| 2572232660 | t3m_01016 | KO:K01468      | imidazolonepropionase [EC:3.5.2.7]                                            | 0.00E+00  |
| 2572232660 | t3m_01016 | ITERM:00502    | imidazolonepropionase (EC 3.5.2.7)                                            |           |
| 2572232660 | t3m_01016 | Locus_type     | CDS                                                                           |           |
| 2572232660 | t3m_01016 | Product_name   | imidazolonepropionase (EC 3.5.2.7)                                            |           |
| 2572232660 | t3m_01016 | Scaffold       | t3m_contig_70_157_len_31137_read_count_2595890.20                             |           |
| 2572232660 | t3m_01016 | Coordinates    | 24121..25392(-)                                                               |           |
| 2572232660 | t3m_01016 | DNA_length     | 1272bp                                                                        |           |
| 2572232660 | t3m_01016 | Protein_length | 423aa                                                                         |           |
| 2572232660 | t3m_01016 | GC             |                                                                               | 0.72      |
| 2572232661 | t3m_01017 | COG_category   | [R] General function prediction only                                          |           |
| 2572232661 | t3m_01017 | COG1234        | Metal-dependent hydrolases of the beta-lactamase superfamily III              | 6.00E-73  |
| 2572232661 | t3m_01017 | pfam12706      | Lactamase_B_2                                                                 | 4.50E-30  |
| 2572232661 | t3m_01017 | EC:3.1.26.11   | Ribonuclease Z.                                                               |           |
| 2572232661 | t3m_01017 | TIGR02651      | ribonuclease Z                                                                | 9.80E-101 |
| 2572232661 | t3m_01017 | KO:K00784      | ribonuclease Z [EC:3.1.26.11]                                                 | 0.00E+00  |
| 2572232661 | t3m_01017 | Locus_type     | CDS                                                                           |           |
| 2572232661 | t3m_01017 | Product_name   | ribonuclease Z                                                                |           |
| 2572232661 | t3m_01017 | Scaffold       | t3m_contig_70_157_len_31137_read_count_2595890.20                             |           |
| 2572232661 | t3m_01017 | Coordinates    | 25389..26291(-)                                                               |           |

|            |           |                |                                                                    |                                                   |          |
|------------|-----------|----------------|--------------------------------------------------------------------|---------------------------------------------------|----------|
| 2572232661 | t3m_01017 | DNA_length     |                                                                    | 903bp                                             |          |
| 2572232661 | t3m_01017 | Protein_length |                                                                    | 300aa                                             |          |
| 2572232661 | t3m_01017 | GC             |                                                                    |                                                   | 0.69     |
| 2572232662 | t3m_01018 | pfam06053      | DUF929                                                             |                                                   | 1.10E-08 |
| 2572232662 | t3m_01018 | Locus_type     |                                                                    | CDS                                               |          |
| 2572232662 | t3m_01018 | Product_name   |                                                                    | Domain of unknown function (DUF929)               |          |
| 2572232662 | t3m_01018 | Scaffold       |                                                                    | t3m_contig_70_157_len_31137_read_count_2595890.20 |          |
| 2572232662 | t3m_01018 | Coordinates    |                                                                    | 26403..27575(+)                                   |          |
| 2572232662 | t3m_01018 | DNA_length     |                                                                    | 1173bp                                            |          |
| 2572232662 | t3m_01018 | Protein_length |                                                                    | 390aa                                             |          |
| 2572232662 | t3m_01018 | GC             |                                                                    |                                                   | 0.65     |
| 2572232662 | t3m_01018 | Transmembrane  |                                                                    | Yes                                               |          |
| 2572232663 | t3m_01019 | COG_category   | [S] Function unknown                                               |                                                   |          |
| 2572232663 | t3m_01019 | COG4243        | Predicted membrane protein                                         |                                                   | 4.00E-12 |
| 2572232663 | t3m_01019 | pfam07884      | VKOR                                                               |                                                   | 4.70E-24 |
| 2572232663 | t3m_01019 | Locus_type     |                                                                    | CDS                                               |          |
| 2572232663 | t3m_01019 | Product_name   |                                                                    | Predicted membrane protein                        |          |
| 2572232663 | t3m_01019 | Scaffold       |                                                                    | t3m_contig_70_157_len_31137_read_count_2595890.20 |          |
| 2572232663 | t3m_01019 | Coordinates    |                                                                    | 27585..28073(+)                                   |          |
| 2572232663 | t3m_01019 | DNA_length     |                                                                    | 489bp                                             |          |
| 2572232663 | t3m_01019 | Protein_length |                                                                    | 162aa                                             |          |
| 2572232663 | t3m_01019 | GC             |                                                                    |                                                   | 0.66     |
| 2572232663 | t3m_01019 | Transmembrane  |                                                                    | Yes                                               |          |
| 2572232664 | t3m_01020 | KEGG_module    | M00159: V-type ATPase, prokaryotes                                 |                                                   |          |
| 2572232664 | t3m_01020 | Metacyc        | PWY-6126: adenosine nucleotides <i>de novo</i> biosynthesis        |                                                   |          |
| 2572232664 | t3m_01020 | pfam00137      | ATP-synt_C                                                         |                                                   | 2.60E-15 |
| 2572232664 | t3m_01020 | EC:3.6.3.14    | H(+)-transporting two-sector ATPase.                               |                                                   |          |
| 2572232664 | t3m_01020 | KO:K02124      | V-type H <sup>+</sup> -transporting ATPase subunit K [EC:3.6.3.14] |                                                   | 4.10E-27 |
| 2572232664 | t3m_01020 | Locus_type     |                                                                    | CDS                                               |          |
| 2572232664 | t3m_01020 | Product_name   |                                                                    | ATP synthase subunit C                            |          |
| 2572232664 | t3m_01020 | Scaffold       |                                                                    | t3m_contig_70_157_len_31137_read_count_2595890.20 |          |

|            |           |                |                                                                    |          |
|------------|-----------|----------------|--------------------------------------------------------------------|----------|
| 2572232664 | t3m_01020 | Coordinates    | 28153..28371(+)                                                    |          |
| 2572232664 | t3m_01020 | DNA_length     | 219bp                                                              |          |
| 2572232664 | t3m_01020 | Protein_length | 72aa                                                               |          |
| 2572232664 | t3m_01020 | GC             |                                                                    | 0.62     |
| 2572232664 | t3m_01020 | Transmembrane  | Yes                                                                |          |
| 2572232665 | t3m_01021 | COG_category   | [C] Energy production and conversion                               |          |
| 2572232665 | t3m_01021 | COG1390        | Archaeal/vacuolar-type H <sup>+</sup> -ATPase subunit E            | 2.00E-11 |
| 2572232665 | t3m_01021 | pfam01991      | vATP-synt_E                                                        | 1.10E-12 |
| 2572232665 | t3m_01021 | Locus_type     | CDS                                                                |          |
| 2572232665 | t3m_01021 | Product_name   | Archaeal/vacuolar-type H <sup>+</sup> -ATPase subunit E            |          |
| 2572232665 | t3m_01021 | Scaffold       | t3m_contig_70_157_len_31137_read_count_2595890.20                  |          |
| 2572232665 | t3m_01021 | Coordinates    | 28389..28940(+)                                                    |          |
| 2572232665 | t3m_01021 | DNA_length     | 552bp                                                              |          |
| 2572232665 | t3m_01021 | Protein_length | 183aa                                                              |          |
| 2572232665 | t3m_01021 | GC             |                                                                    | 0.7      |
| 2572232666 | t3m_01022 | KEGG_module    | M00159: V-type ATPase, prokaryotes                                 |          |
| 2572232666 | t3m_01022 | Metacyc        | PWY-6126: adenosine nucleotides <i>de novo</i> biosynthesis        |          |
| 2572232666 | t3m_01022 | COG_category   | [C] Energy production and conversion                               |          |
| 2572232666 | t3m_01022 | COG1527        | Archaeal/vacuolar-type H <sup>+</sup> -ATPase subunit C            | 1.00E-44 |
| 2572232666 | t3m_01022 | pfam01992      | vATP-synt_AC39                                                     | 4.70E-31 |
| 2572232666 | t3m_01022 | EC:3.6.3.14    | H(+)-transporting two-sector ATPase.                               |          |
| 2572232666 | t3m_01022 | KO:K02119      | V-type H <sup>+</sup> -transporting ATPase subunit C [EC:3.6.3.14] | 0.00E+00 |
| 2572232666 | t3m_01022 | Locus_type     | CDS                                                                |          |
| 2572232666 | t3m_01022 | Product_name   | Archaeal/vacuolar-type H <sup>+</sup> -ATPase subunit C            |          |
| 2572232666 | t3m_01022 | Scaffold       | t3m_contig_70_157_len_31137_read_count_2595890.20                  |          |
| 2572232666 | t3m_01022 | Coordinates    | 28950..30026(+)                                                    |          |
| 2572232666 | t3m_01022 | DNA_length     | 1077bp                                                             |          |
| 2572232666 | t3m_01022 | Protein_length | 358aa                                                              |          |
| 2572232666 | t3m_01022 | GC             |                                                                    | 0.68     |
| 2572232667 | t3m_01023 | pfam01496      | V_ATPase_I                                                         | 3.40E-20 |
| 2572232667 | t3m_01023 | pfam01496      | V_ATPase_I                                                         | 1.60E-21 |

|            |           |                |                                                                   |          |
|------------|-----------|----------------|-------------------------------------------------------------------|----------|
| 2572232667 | t3m_01023 | Locus_type     | CDS                                                               |          |
| 2572232667 | t3m_01023 | Product_name   | V-type ATPase 116kDa subunit family                               |          |
| 2572232667 | t3m_01023 | Scaffold       | t3m_contig_70_157_len_31137_read_count_2595890.20                 |          |
| 2572232667 | t3m_01023 | Coordinates    | 30047..31135(-)                                                   |          |
| 2572232667 | t3m_01023 | DNA_length     | 1089bp                                                            |          |
| 2572232667 | t3m_01023 | Protein_length | 362aa                                                             |          |
| 2572232667 | t3m_01023 | GC             |                                                                   | 0.66     |
| 2572232667 | t3m_01023 | Transmembrane  | Yes                                                               |          |
|            |           |                |                                                                   |          |
| 2572232668 | t3m_01024 | COG_category   | [K] Transcription                                                 |          |
| 2572232668 | t3m_01024 | COG1958        | Small nuclear ribonucleoprotein (snRNP) homolog                   | 2.00E-13 |
| 2572232668 | t3m_01024 | pfam01423      | LSM                                                               | 1.10E-18 |
| 2572232668 | t3m_01024 | KO:K04796      | small nuclear ribonucleoprotein                                   | 1.30E-13 |
| 2572232668 | t3m_01024 | ITERM:05216    | Small nuclear ribonucleoprotein, LSM family                       |          |
| 2572232668 | t3m_01024 | Locus_type     | CDS                                                               |          |
| 2572232668 | t3m_01024 | Product_name   | Small nuclear ribonucleoprotein, LSM family                       |          |
| 2572232668 | t3m_01024 | Scaffold       | t3m_contig_70_162_len_30467_read_count_2413924.21                 |          |
| 2572232668 | t3m_01024 | Coordinates    | 279..521(+)                                                       |          |
| 2572232668 | t3m_01024 | DNA_length     | 243bp                                                             |          |
| 2572232668 | t3m_01024 | Protein_length | 80aa                                                              |          |
| 2572232668 | t3m_01024 | GC             |                                                                   | 0.67     |
|            |           |                |                                                                   |          |
| 2572232669 | t3m_01025 | Metacyc        | PWY-6167: flavin biosynthesis II (archaea)                        |          |
| 2572232669 | t3m_01025 | COG_category   | [H] Coenzyme transport and metabolism                             |          |
| 2572232669 | t3m_01025 | COG_category   | [K] Transcription                                                 |          |
| 2572232669 | t3m_01025 | COG1339        | Transcriptional regulator of a riboflavin/FAD biosynthetic operon | 8.00E-50 |
| 2572232669 | t3m_01025 | pfam01982      | CTP-dep_RFKase                                                    | 2.90E-38 |
| 2572232669 | t3m_01025 | EC:2.7.1.161   | CTP-dependent riboflavin kinase.                                  |          |
| 2572232669 | t3m_01025 | KO:K07732      | riboflavin kinase, archaea type [EC:2.7.1.161]                    | 9.20E-44 |
| 2572232669 | t3m_01025 | Locus_type     | CDS                                                               |          |
| 2572232669 | t3m_01025 | Product_name   | Transcriptional regulator of a riboflavin/FAD biosynthetic operon |          |
| 2572232669 | t3m_01025 | Scaffold       | t3m_contig_70_162_len_30467_read_count_2413924.21                 |          |
| 2572232669 | t3m_01025 | Coordinates    | 521..1225(+)                                                      |          |
| 2572232669 | t3m_01025 | DNA_length     | 705bp                                                             |          |

|            |           |                |                                                      |          |
|------------|-----------|----------------|------------------------------------------------------|----------|
| 2572232669 | t3m_01025 | Protein_length | 234aa                                                |          |
| 2572232669 | t3m_01025 | GC             |                                                      | 0.68     |
| 2572232670 | t3m_01026 | COG_category   | [R] General function prediction only                 |          |
| 2572232670 | t3m_01026 | COG1244        | Predicted Fe-S oxidoreductase                        | 8.00E-85 |
| 2572232670 | t3m_01026 | pfam04055      | Radical_SAM                                          | 5.30E-07 |
| 2572232670 | t3m_01026 | TIGR01210      | TIGR01210 family protein                             | 2.70E-92 |
| 2572232670 | t3m_01026 | Locus_type     | CDS                                                  |          |
| 2572232670 | t3m_01026 | Product_name   | TIGR01210 family protein                             |          |
| 2572232670 | t3m_01026 | Scaffold       | t3m_contig_70_162_len_30467_read_count_2413924.21    |          |
| 2572232670 | t3m_01026 | Coordinates    | 1222..2244(+)                                        |          |
| 2572232670 | t3m_01026 | DNA_length     | 1023bp                                               |          |
| 2572232670 | t3m_01026 | Protein_length | 340aa                                                |          |
| 2572232670 | t3m_01026 | GC             |                                                      | 0.71     |
| 2572232671 | t3m_01027 | KEGG_module    | M00115: NAD biosynthesis, aspartate => NAD           |          |
| 2572232671 | t3m_01027 | Metacyc        | PYRIDNUCSYN-PWY: NAD biosynthesis I (from aspartate) |          |
| 2572232671 | t3m_01027 | COG_category   | [H] Coenzyme transport and metabolism                |          |
| 2572232671 | t3m_01027 | COG0171        | NAD synthase                                         | 3.00E-66 |
| 2572232671 | t3m_01027 | pfam02540      | NAD_synthase                                         | 9.60E-77 |
| 2572232671 | t3m_01027 | EC:6.3.1.5     | NAD(+) synthase.                                     |          |
| 2572232671 | t3m_01027 | TIGR00552      | NAD+ synthetase                                      | 4.40E-77 |
| 2572232671 | t3m_01027 | KO:K01916      | NAD+ synthase [EC:6.3.1.5]                           | 0.00E+00 |
| 2572232671 | t3m_01027 | Locus_type     | CDS                                                  |          |
| 2572232671 | t3m_01027 | Product_name   | NAD+ synthetase                                      |          |
| 2572232671 | t3m_01027 | Scaffold       | t3m_contig_70_162_len_30467_read_count_2413924.21    |          |
| 2572232671 | t3m_01027 | Coordinates    | 2241..3050(+)                                        |          |
| 2572232671 | t3m_01027 | DNA_length     | 810bp                                                |          |
| 2572232671 | t3m_01027 | Protein_length | 269aa                                                |          |
| 2572232671 | t3m_01027 | GC             |                                                      | 0.7      |
| 2572232672 | t3m_01028 | Locus_type     | CDS                                                  |          |
| 2572232672 | t3m_01028 | Product_name   | hypothetical protein                                 |          |
| 2572232672 | t3m_01028 | Scaffold       | t3m_contig_70_162_len_30467_read_count_2413924.21    |          |

|            |           |                |                                                     |          |
|------------|-----------|----------------|-----------------------------------------------------|----------|
| 2572232672 | t3m_01028 | Coordinates    | 3289..3516(-)                                       |          |
| 2572232672 | t3m_01028 | DNA_length     | 228bp                                               |          |
| 2572232672 | t3m_01028 | Protein_length | 75aa                                                |          |
| 2572232672 | t3m_01028 | GC             |                                                     | 0.68     |
| 2572232673 | t3m_01029 | KEGG_module    | M00360: Aminoacyl-tRNA biosynthesis, prokaryotes    |          |
| 2572232673 | t3m_01029 | KEGG_module    | M00359: Aminoacyl-tRNA biosynthesis, eukaryotes     |          |
| 2572232673 | t3m_01029 | Metacyc        | TRNA-CHARGING-PWY: tRNA charging                    |          |
| 2572232673 | t3m_01029 | IMG_pathway    | 493: L-histidine ligation to tRNA(His)              |          |
| 2572232673 | t3m_01029 | COG_category   | [J] Translation, ribosomal structure and biogenesis |          |
| 2572232673 | t3m_01029 | COG0124        | Histidyl-tRNA synthetase                            | 9.00E-82 |
| 2572232673 | t3m_01029 | pfam03129      | HGTP_anticodon                                      | 9.40E-08 |
| 2572232673 | t3m_01029 | pfam13393      | tRNA-synt_His                                       | 2.20E-41 |
| 2572232673 | t3m_01029 | EC:6.1.1.21    | Histidine--tRNA ligase.                             |          |
| 2572232673 | t3m_01029 | TIGR00442      | histidyl-tRNA synthetase                            | 4.80E-93 |
| 2572232673 | t3m_01029 | KO:K01892      | histidyl-tRNA synthetase [EC:6.1.1.21]              | 0.00E+00 |
| 2572232673 | t3m_01029 | ITERM:00386    | histidyl-tRNA synthetase (EC 6.1.1.21)              |          |
| 2572232673 | t3m_01029 | Locus_type     | CDS                                                 |          |
| 2572232673 | t3m_01029 | Product_name   | histidyl-tRNA synthetase (EC 6.1.1.21)              |          |
| 2572232673 | t3m_01029 | Scaffold       | t3m_contig_70_162_len_30467_read_count_2413924.21   |          |
| 2572232673 | t3m_01029 | Coordinates    | 3885..5186(-)                                       |          |
| 2572232673 | t3m_01029 | DNA_length     | 1302bp                                              |          |
| 2572232673 | t3m_01029 | Protein_length | 433aa                                               |          |
| 2572232673 | t3m_01029 | GC             |                                                     | 0.72     |
| 2572232674 | t3m_01030 | Locus_type     | CDS                                                 |          |
| 2572232674 | t3m_01030 | Product_name   | hypothetical protein                                |          |
| 2572232674 | t3m_01030 | Scaffold       | t3m_contig_70_162_len_30467_read_count_2413924.21   |          |
| 2572232674 | t3m_01030 | Coordinates    | 5216..5947(-)                                       |          |
| 2572232674 | t3m_01030 | DNA_length     | 732bp                                               |          |
| 2572232674 | t3m_01030 | Protein_length | 243aa                                               |          |
| 2572232674 | t3m_01030 | GC             |                                                     | 0.71     |
| 2572232675 | t3m_01031 | Locus_type     | CDS                                                 |          |

|            |           |                |                                                                                  |          |
|------------|-----------|----------------|----------------------------------------------------------------------------------|----------|
| 2572232675 | t3m_01031 | Product_name   | hypothetical protein                                                             |          |
| 2572232675 | t3m_01031 | Scaffold       | t3m_contig_70_162_len_30467_read_count_2413924.21                                |          |
| 2572232675 | t3m_01031 | Coordinates    | 5950..6258(-)                                                                    |          |
| 2572232675 | t3m_01031 | DNA_length     | 309bp                                                                            |          |
| 2572232675 | t3m_01031 | Protein_length | 102aa                                                                            |          |
| 2572232675 | t3m_01031 | GC             |                                                                                  | 0.7      |
| 2572232676 | t3m_01032 | COG_category   | [O] Posttranslational modification, protein turnover, chaperones                 |          |
| 2572232676 | t3m_01032 | COG0501        | Zn-dependent protease with chaperone function                                    | 4.00E-36 |
| 2572232676 | t3m_01032 | pfam01435      | Peptidase_M48                                                                    | 2.00E-37 |
| 2572232676 | t3m_01032 | EC:3.4.24.-    | Hydrolases. Acting on peptide bonds (peptide hydrolases). Metalloendopeptidases. |          |
| 2572232676 | t3m_01032 | KO:K03799      | heat shock protein HtpX [EC:3.4.24.-]                                            | 0.00E+00 |
| 2572232676 | t3m_01032 | Locus_type     | CDS                                                                              |          |
| 2572232676 | t3m_01032 | Product_name   | Heat shock protein. Metallo peptidase. MEROPS family M48B                        |          |
| 2572232676 | t3m_01032 | Scaffold       | t3m_contig_70_162_len_30467_read_count_2413924.21                                |          |
| 2572232676 | t3m_01032 | Coordinates    | 6343..7275(-)                                                                    |          |
| 2572232676 | t3m_01032 | DNA_length     | 933bp                                                                            |          |
| 2572232676 | t3m_01032 | Protein_length | 310aa                                                                            |          |
| 2572232676 | t3m_01032 | GC             |                                                                                  | 0.68     |
| 2572232676 | t3m_01032 | Transmembrane  | Yes                                                                              |          |
| 2572232677 | t3m_01033 | COG_category   | [R] General function prediction only                                             |          |
| 2572232677 | t3m_01033 | COG1571        | Predicted DNA-binding protein containing a Zn-ribbon domain                      | 4.00E-78 |
| 2572232677 | t3m_01033 | pfam08489      | DUF1743                                                                          | 2.90E-26 |
| 2572232677 | t3m_01033 | Locus_type     | CDS                                                                              |          |
| 2572232677 | t3m_01033 | Product_name   | Predicted DNA-binding protein containing a Zn-ribbon domain                      |          |
| 2572232677 | t3m_01033 | Scaffold       | t3m_contig_70_162_len_30467_read_count_2413924.21                                |          |
| 2572232677 | t3m_01033 | Coordinates    | 7342..8661(-)                                                                    |          |
| 2572232677 | t3m_01033 | DNA_length     | 1320bp                                                                           |          |
| 2572232677 | t3m_01033 | Protein_length | 439aa                                                                            |          |
| 2572232677 | t3m_01033 | GC             |                                                                                  | 0.72     |
| 2572232678 | t3m_01034 | KEGG_module    | M00011: Citrate cycle, second carbon oxidation, 2-oxoglutarate => oxaloacetate   |          |
| 2572232678 | t3m_01034 | KEGG_module    | M00311: 2-oxoglutarate:ferredoxin oxidoreductase                                 |          |

|            |           |                |                                                                                |          |
|------------|-----------|----------------|--------------------------------------------------------------------------------|----------|
| 2572232678 | t3m_01034 | Metacyc        | PWY-6969: TCA cycle V (2-oxoglutarate:ferredoxin oxidoreductase)               |          |
| 2572232678 | t3m_01034 | Metacyc        | REDCITCYC: TCA cycle III (helicobacter)                                        |          |
| 2572232678 | t3m_01034 | Metacyc        | P23-PWY: reductive TCA cycle I                                                 |          |
| 2572232678 | t3m_01034 | Metacyc        | PWY-5392: reductive TCA cycle II                                               |          |
| 2572232678 | t3m_01034 | Metacyc        | P42-PWY: incomplete reductive TCA cycle                                        |          |
| 2572232678 | t3m_01034 | COG_category   | [C] Energy production and conversion                                           |          |
| 2572232678 | t3m_01034 | COG1013        | Pyruvate:ferredoxin oxidoreductase and related 2-oxoacid:ferredoxin o          | 1.00E-57 |
| 2572232678 | t3m_01034 | pfam02775      | TPP_enzyme_C                                                                   | 9.70E-22 |
| 2572232678 | t3m_01034 | pfam12367      | PFO_beta_C                                                                     | 9.10E-06 |
| 2572232678 | t3m_01034 | EC:1.2.7.3     | 2-oxoglutarate synthase.                                                       |          |
| 2572232678 | t3m_01034 | KO:K00175      | 2-oxoglutarate ferredoxin oxidoreductase subunit beta [EC:1.2.7.3]             | 0.00E+00 |
| 2572232678 | t3m_01034 | Locus_type     | CDS                                                                            |          |
| 2572232678 | t3m_01034 | Product_name   | Pyruvate:ferredoxin oxidoreductase and related 2-oxoacid:ferredoxin ox         |          |
| 2572232678 | t3m_01034 | Scaffold       | t3m_contig_70_162_len_30467_read_count_2413924.21                              |          |
| 2572232678 | t3m_01034 | Coordinates    | 8701..9567(-)                                                                  |          |
| 2572232678 | t3m_01034 | DNA_length     | 867bp                                                                          |          |
| 2572232678 | t3m_01034 | Protein_length | 288aa                                                                          |          |
| 2572232678 | t3m_01034 | GC             |                                                                                | 0.65     |
| 2572232679 | t3m_01035 | KEGG_module    | M00173: Reductive citric acid cycle (Arnon-Buchanan cycle)                     |          |
| 2572232679 | t3m_01035 | KEGG_module    | M00011: Citrate cycle, second carbon oxidation, 2-oxoglutarate => oxaloacetate |          |
| 2572232679 | t3m_01035 | KEGG_module    | M00311: 2-oxoglutarate:ferredoxin oxidoreductase                               |          |
| 2572232679 | t3m_01035 | Metacyc        | P23-PWY: reductive TCA cycle I                                                 |          |
| 2572232679 | t3m_01035 | Metacyc        | PWY-5392: reductive TCA cycle II                                               |          |
| 2572232679 | t3m_01035 | Metacyc        | P42-PWY: incomplete reductive TCA cycle                                        |          |
| 2572232679 | t3m_01035 | Metacyc        | REDCITCYC: TCA cycle III (helicobacter)                                        |          |
| 2572232679 | t3m_01035 | Metacyc        | PWY-6969: TCA cycle V (2-oxoglutarate:ferredoxin oxidoreductase)               |          |
| 2572232679 | t3m_01035 | COG_category   | [C] Energy production and conversion                                           |          |
| 2572232679 | t3m_01035 | COG0674        | Pyruvate:ferredoxin oxidoreductase and related 2-oxoacid:ferredoxin o          | 9.00E-66 |
| 2572232679 | t3m_01035 | pfam01558      | POR                                                                            | 3.10E-29 |
| 2572232679 | t3m_01035 | pfam01855      | POR_N                                                                          | 2.10E-57 |
| 2572232679 | t3m_01035 | EC:1.2.7.3     | 2-oxoglutarate synthase.                                                       |          |
| 2572232679 | t3m_01035 | TIGR03710      | 2-oxoacid:acceptor oxidoreductase, alpha subunit                               | 0.00E+00 |
| 2572232679 | t3m_01035 | KO:K00174      | 2-oxoglutarate ferredoxin oxidoreductase subunit alpha [EC:1.2.7.3]            | 0.00E+00 |



|            |           |                |                                                                       |          |
|------------|-----------|----------------|-----------------------------------------------------------------------|----------|
| 2572232679 | t3m_01035 | Locus_type     | CDS                                                                   |          |
| 2572232679 | t3m_01035 | Product_name   | 2-oxoacid:acceptor oxidoreductase, alpha subunit                      |          |
| 2572232679 | t3m_01035 | Scaffold       | t3m_contig_70_162_len_30467_read_count_2413924.21                     |          |
| 2572232679 | t3m_01035 | Coordinates    | 9569..11362(-)                                                        |          |
| 2572232679 | t3m_01035 | DNA_length     | 1794bp                                                                |          |
| 2572232679 | t3m_01035 | Protein_length | 597aa                                                                 |          |
| 2572232679 | t3m_01035 | GC             |                                                                       | 0.67     |
| 2572232680 | t3m_01036 | COG_category   | [R] General function prediction only                                  |          |
| 2572232680 | t3m_01036 | COG1287        | Uncharacterized membrane protein, required for N-linked glycosylation | 3.00E-49 |
| 2572232680 | t3m_01036 | pfam13620      | CarboxypepD_reg                                                       | 2.50E-07 |
| 2572232680 | t3m_01036 | pfam13620      | CarboxypepD_reg                                                       | 9.80E-10 |
| 2572232680 | t3m_01036 | pfam02516      | STT3                                                                  | 8.70E-13 |
| 2572232680 | t3m_01036 | Locus_type     | CDS                                                                   |          |
| 2572232680 | t3m_01036 | Product_name   | Uncharacterized membrane protein, required for N-linked glycosylation |          |
| 2572232680 | t3m_01036 | Scaffold       | t3m_contig_70_162_len_30467_read_count_2413924.21                     |          |
| 2572232680 | t3m_01036 | Coordinates    | 11688..18272(+)                                                       |          |
| 2572232680 | t3m_01036 | DNA_length     | 6585bp                                                                |          |
| 2572232680 | t3m_01036 | Protein_length | 2194aa                                                                |          |
| 2572232680 | t3m_01036 | GC             |                                                                       | 0.68     |
| 2572232680 | t3m_01036 | Transmembrane  | Yes                                                                   |          |
| 2572232681 | t3m_01037 | Locus_type     | CDS                                                                   |          |
| 2572232681 | t3m_01037 | Product_name   | hypothetical protein                                                  |          |
| 2572232681 | t3m_01037 | Scaffold       | t3m_contig_70_162_len_30467_read_count_2413924.21                     |          |
| 2572232681 | t3m_01037 | Coordinates    | 18239..19084(+)                                                       |          |
| 2572232681 | t3m_01037 | DNA_length     | 846bp                                                                 |          |
| 2572232681 | t3m_01037 | Protein_length | 281aa                                                                 |          |
| 2572232681 | t3m_01037 | GC             |                                                                       | 0.69     |
| 2572232681 | t3m_01037 | Transmembrane  | Yes                                                                   |          |
| 2572232682 | t3m_01038 | KO:K07580      | hypothetical protein                                                  | 2.30E-09 |
| 2572232682 | t3m_01038 | Locus_type     | CDS                                                                   |          |
| 2572232682 | t3m_01038 | Product_name   | hypothetical protein                                                  |          |

|            |           |                |                                                     |                                                             |          |
|------------|-----------|----------------|-----------------------------------------------------|-------------------------------------------------------------|----------|
| 2572232682 | t3m_01038 | Scaffold       |                                                     | t3m_contig_70_162_len_30467_read_count_2413924.21           |          |
| 2572232682 | t3m_01038 | Coordinates    |                                                     | 19151..19279(+)                                             |          |
| 2572232682 | t3m_01038 | DNA_length     |                                                     | 129bp                                                       |          |
| 2572232682 | t3m_01038 | Protein_length |                                                     | 42aa                                                        |          |
| 2572232682 | t3m_01038 | GC             |                                                     |                                                             | 0.71     |
|            |           |                |                                                     |                                                             |          |
| 2572232683 | t3m_01039 | COG_category   | [J] Translation, ribosomal structure and biogenesis |                                                             |          |
| 2572232683 | t3m_01039 | COG2092        | Translation elongation factor EF-1beta              |                                                             | 4.00E-14 |
| 2572232683 | t3m_01039 | pfam00736      | EF1_GNE                                             |                                                             | 2.00E-17 |
| 2572232683 | t3m_01039 | TIGR00489      | translation elongation factor aEF-1 beta            |                                                             | 2.00E-24 |
| 2572232683 | t3m_01039 | KO:K03232      | elongation factor 1-beta                            |                                                             | 2.00E-15 |
| 2572232683 | t3m_01039 | Locus_type     |                                                     | CDS                                                         |          |
| 2572232683 | t3m_01039 | Product_name   |                                                     | translation elongation factor aEF-1 beta                    |          |
| 2572232683 | t3m_01039 | Scaffold       |                                                     | t3m_contig_70_162_len_30467_read_count_2413924.21           |          |
| 2572232683 | t3m_01039 | Coordinates    |                                                     | 19288..19554(+)                                             |          |
| 2572232683 | t3m_01039 | DNA_length     |                                                     | 267bp                                                       |          |
| 2572232683 | t3m_01039 | Protein_length |                                                     | 88aa                                                        |          |
| 2572232683 | t3m_01039 | GC             |                                                     |                                                             | 0.67     |
|            |           |                |                                                     |                                                             |          |
| 2572232684 | t3m_01040 | pfam04307      | DUF457                                              |                                                             | 3.90E-16 |
| 2572232684 | t3m_01040 | Locus_type     |                                                     | CDS                                                         |          |
| 2572232684 | t3m_01040 | Product_name   |                                                     | Predicted membrane-bound metal-dependent hydrolase (DUF457) |          |
| 2572232684 | t3m_01040 | Scaffold       |                                                     | t3m_contig_70_162_len_30467_read_count_2413924.21           |          |
| 2572232684 | t3m_01040 | Coordinates    |                                                     | 19577..20560(+)                                             |          |
| 2572232684 | t3m_01040 | DNA_length     |                                                     | 984bp                                                       |          |
| 2572232684 | t3m_01040 | Protein_length |                                                     | 327aa                                                       |          |
| 2572232684 | t3m_01040 | GC             |                                                     |                                                             | 0.69     |
| 2572232684 | t3m_01040 | Transmembrane  |                                                     | Yes                                                         |          |
|            |           |                |                                                     |                                                             |          |
| 2572232685 | t3m_01041 | Locus_type     |                                                     | CDS                                                         |          |
| 2572232685 | t3m_01041 | Product_name   |                                                     | hypothetical protein                                        |          |
| 2572232685 | t3m_01041 | Scaffold       |                                                     | t3m_contig_70_162_len_30467_read_count_2413924.21           |          |
| 2572232685 | t3m_01041 | Coordinates    |                                                     | 20627..20839(-)                                             |          |
| 2572232685 | t3m_01041 | DNA_length     |                                                     | 213bp                                                       |          |

|            |           |                |                                                                         |          |
|------------|-----------|----------------|-------------------------------------------------------------------------|----------|
| 2572232685 | t3m_01041 | Protein_length | 70aa                                                                    |          |
| 2572232685 | t3m_01041 | GC             |                                                                         | 0.63     |
| 2572232686 | t3m_01042 | Metacyc        | PWY-7165: L-ascorbate biosynthesis VI (engineered pathway)              |          |
| 2572232686 | t3m_01042 | Metacyc        | KETOGLUCONMET-PWY: ketogluconate metabolism                             |          |
| 2572232686 | t3m_01042 | COG_category   | [R] General function prediction only                                    |          |
| 2572232686 | t3m_01042 | COG0656        | Aldo/keto reductases, related to diketogulonate reductase               | 1.00E-90 |
| 2572232686 | t3m_01042 | pfam00248      | Aldo_ket_red                                                            | 5.70E-52 |
| 2572232686 | t3m_01042 | EC:1.1.1.274   | 2,5-didehydrogluconate reductase.                                       |          |
| 2572232686 | t3m_01042 | KO:K05885      | 2,5-diketo-D-gluconate reductase [EC:1.1.1.274]                         | 0.00E+00 |
| 2572232686 | t3m_01042 | Locus_type     | CDS                                                                     |          |
| 2572232686 | t3m_01042 | Product_name   | Aldo/keto reductases, related to diketogulonate reductase               |          |
| 2572232686 | t3m_01042 | Scaffold       | t3m_contig_70_162_len_30467_read_count_2413924.21                       |          |
| 2572232686 | t3m_01042 | Coordinates    | 21010..21861(-)                                                         |          |
| 2572232686 | t3m_01042 | DNA_length     | 852bp                                                                   |          |
| 2572232686 | t3m_01042 | Protein_length | 283aa                                                                   |          |
| 2572232686 | t3m_01042 | GC             |                                                                         | 0.7      |
| 2572232687 | t3m_01043 | Locus_type     | CDS                                                                     |          |
| 2572232687 | t3m_01043 | Product_name   | hypothetical protein                                                    |          |
| 2572232687 | t3m_01043 | Scaffold       | t3m_contig_70_162_len_30467_read_count_2413924.21                       |          |
| 2572232687 | t3m_01043 | Coordinates    | 21886..22158(-)                                                         |          |
| 2572232687 | t3m_01043 | DNA_length     | 273bp                                                                   |          |
| 2572232687 | t3m_01043 | Protein_length | 90aa                                                                    |          |
| 2572232687 | t3m_01043 | GC             |                                                                         | 0.7      |
| 2572232688 | t3m_01044 | COG_category   | [R] General function prediction only                                    |          |
| 2572232688 | t3m_01044 | COG0596        | Predicted hydrolases or acyltransferases (alpha/beta hydrolase superfa  | 2.00E-19 |
| 2572232688 | t3m_01044 | pfam12697      | Abhydrolase_6                                                           | 6.00E-39 |
| 2572232688 | t3m_01044 | Locus_type     | CDS                                                                     |          |
| 2572232688 | t3m_01044 | Product_name   | Predicted hydrolases or acyltransferases (alpha/beta hydrolase superfan |          |
| 2572232688 | t3m_01044 | Scaffold       | t3m_contig_70_162_len_30467_read_count_2413924.21                       |          |
| 2572232688 | t3m_01044 | Coordinates    | 22345..23172(+)                                                         |          |
| 2572232688 | t3m_01044 | DNA_length     | 828bp                                                                   |          |

|            |           |                |                                                                              |  |          |
|------------|-----------|----------------|------------------------------------------------------------------------------|--|----------|
| 2572232688 | t3m_01044 | Protein_length | 275aa                                                                        |  |          |
| 2572232688 | t3m_01044 | GC             |                                                                              |  | 0.68     |
| 2572232689 | t3m_01045 | Locus_type     | CDS                                                                          |  |          |
| 2572232689 | t3m_01045 | Product_name   | hypothetical protein                                                         |  |          |
| 2572232689 | t3m_01045 | Scaffold       | t3m_contig_70_162_len_30467_read_count_2413924.21                            |  |          |
| 2572232689 | t3m_01045 | Coordinates    | 23193..23408(-)                                                              |  |          |
| 2572232689 | t3m_01045 | DNA_length     | 216bp                                                                        |  |          |
| 2572232689 | t3m_01045 | Protein_length | 71aa                                                                         |  |          |
| 2572232689 | t3m_01045 | GC             |                                                                              |  | 0.67     |
| 2572232690 | t3m_01046 | COG_category   | [P] Inorganic ion transport and metabolism                                   |  |          |
| 2572232690 | t3m_01046 | COG0783        | DNA-binding ferritin-like protein (oxidative damage protectant)              |  | 6.00E-33 |
| 2572232690 | t3m_01046 | pfam00210      | Ferritin                                                                     |  | 1.30E-28 |
| 2572232690 | t3m_01046 | KO:K04047      | starvation-inducible DNA-binding protein                                     |  | 1.10E-28 |
| 2572232690 | t3m_01046 | Locus_type     | CDS                                                                          |  |          |
| 2572232690 | t3m_01046 | Product_name   | DNA-binding ferritin-like protein (oxidative damage protectant)              |  |          |
| 2572232690 | t3m_01046 | Scaffold       | t3m_contig_70_162_len_30467_read_count_2413924.21                            |  |          |
| 2572232690 | t3m_01046 | Coordinates    | 23423..23899(+)                                                              |  |          |
| 2572232690 | t3m_01046 | DNA_length     | 477bp                                                                        |  |          |
| 2572232690 | t3m_01046 | Protein_length | 158aa                                                                        |  |          |
| 2572232690 | t3m_01046 | GC             |                                                                              |  | 0.63     |
| 2572232691 | t3m_01047 | COG_category   | [Q] Secondary metabolites biosynthesis, transport and catabolism             |  |          |
| 2572232691 | t3m_01047 | COG_category   | [R] General function prediction only                                         |  |          |
| 2572232691 | t3m_01047 | COG_category   | [I] Lipid transport and metabolism                                           |  |          |
| 2572232691 | t3m_01047 | COG1028        | Dehydrogenases with different specificities (related to short-chain alcohol) |  | 2.00E-42 |
| 2572232691 | t3m_01047 | pfam13561      | adh_short_C2                                                                 |  | 5.50E-30 |
| 2572232691 | t3m_01047 | Locus_type     | CDS                                                                          |  |          |
| 2572232691 | t3m_01047 | Product_name   | Dehydrogenases with different specificities (related to short-chain alcohol) |  |          |
| 2572232691 | t3m_01047 | Scaffold       | t3m_contig_70_162_len_30467_read_count_2413924.21                            |  |          |
| 2572232691 | t3m_01047 | Coordinates    | 23907..24737(-)                                                              |  |          |
| 2572232691 | t3m_01047 | DNA_length     | 831bp                                                                        |  |          |
| 2572232691 | t3m_01047 | Protein_length | 276aa                                                                        |  |          |

|            |           |                |                                                                          |          |
|------------|-----------|----------------|--------------------------------------------------------------------------|----------|
| 2572232691 | t3m_01047 | GC             |                                                                          | 0.7      |
| 2572232692 | t3m_01048 | COG_category   | [C] Energy production and conversion                                     |          |
| 2572232692 | t3m_01048 | COG_category   | [O] Posttranslational modification, protein turnover, chaperones         |          |
| 2572232692 | t3m_01048 | COG0526        | Thiol-disulfide isomerase and thioredoxins                               | 1.00E-05 |
| 2572232692 | t3m_01048 | pfam00085      | Thioredoxin                                                              | 2.70E-11 |
| 2572232692 | t3m_01048 | KO:K03671      | thioredoxin 1                                                            | 1.40E-07 |
| 2572232692 | t3m_01048 | Locus_type     | CDS                                                                      |          |
| 2572232692 | t3m_01048 | Product_name   | Thioredoxin                                                              |          |
| 2572232692 | t3m_01048 | Scaffold       | t3m_contig_70_162_len_30467_read_count_2413924.21                        |          |
| 2572232692 | t3m_01048 | Coordinates    | 24830..25186(-)                                                          |          |
| 2572232692 | t3m_01048 | DNA_length     | 357bp                                                                    |          |
| 2572232692 | t3m_01048 | Protein_length | 118aa                                                                    |          |
| 2572232692 | t3m_01048 | GC             |                                                                          | 0.67     |
| 2572232693 | t3m_01049 | COG_category   | [J] Translation, ribosomal structure and biogenesis                      |          |
| 2572232693 | t3m_01049 | COG1184        | Translation initiation factor 2B subunit, eIF-2B alpha/beta/delta family | 1.00E-25 |
| 2572232693 | t3m_01049 | pfam01008      | IF-2B                                                                    | 9.90E-23 |
| 2572232693 | t3m_01049 | Locus_type     | CDS                                                                      |          |
| 2572232693 | t3m_01049 | Product_name   | Translation initiation factor 2B subunit, eIF-2B alpha/beta/delta family |          |
| 2572232693 | t3m_01049 | Scaffold       | t3m_contig_70_162_len_30467_read_count_2413924.21                        |          |
| 2572232693 | t3m_01049 | Coordinates    | 25227..26057(-)                                                          |          |
| 2572232693 | t3m_01049 | DNA_length     | 831bp                                                                    |          |
| 2572232693 | t3m_01049 | Protein_length | 276aa                                                                    |          |
| 2572232693 | t3m_01049 | GC             |                                                                          | 0.72     |
| 2572232694 | t3m_01050 | pfam00756      | Esterase                                                                 | 4.30E-14 |
| 2572232694 | t3m_01050 | KO:K07214      | enterochelin esterase and related enzymes                                | 0.00E+00 |
| 2572232694 | t3m_01050 | Locus_type     | CDS                                                                      |          |
| 2572232694 | t3m_01050 | Product_name   | Putative esterase                                                        |          |
| 2572232694 | t3m_01050 | Scaffold       | t3m_contig_70_162_len_30467_read_count_2413924.21                        |          |
| 2572232694 | t3m_01050 | Coordinates    | 26169..27230(+)                                                          |          |
| 2572232694 | t3m_01050 | DNA_length     | 1062bp                                                                   |          |
| 2572232694 | t3m_01050 | Protein_length | 353aa                                                                    |          |

|            |           |                |                                                                                                 |          |
|------------|-----------|----------------|-------------------------------------------------------------------------------------------------|----------|
| 2572232694 | t3m_01050 | GC             |                                                                                                 | 0.69     |
| 2572232695 | t3m_01051 | pfam13420      | Acetyltransf_4                                                                                  | 2.70E-16 |
| 2572232695 | t3m_01051 | Locus_type     | CDS                                                                                             |          |
| 2572232695 | t3m_01051 | Product_name   | Acetyltransferase (GNAT) domain                                                                 |          |
| 2572232695 | t3m_01051 | Scaffold       | t3m_contig_70_162_len_30467_read_count_2413924.21                                               |          |
| 2572232695 | t3m_01051 | Coordinates    | 27544..27957(+)                                                                                 |          |
| 2572232695 | t3m_01051 | DNA_length     | 414bp                                                                                           |          |
| 2572232695 | t3m_01051 | Protein_length | 137aa                                                                                           |          |
| 2572232695 | t3m_01051 | GC             |                                                                                                 | 0.64     |
| 2572232696 | t3m_01052 | pfam07883      | Cupin_2                                                                                         | 3.50E-05 |
| 2572232696 | t3m_01052 | Locus_type     | CDS                                                                                             |          |
| 2572232696 | t3m_01052 | Product_name   | Cupin domain                                                                                    |          |
| 2572232696 | t3m_01052 | Scaffold       | t3m_contig_70_162_len_30467_read_count_2413924.21                                               |          |
| 2572232696 | t3m_01052 | Coordinates    | 27997..28407(-)                                                                                 |          |
| 2572232696 | t3m_01052 | DNA_length     | 411bp                                                                                           |          |
| 2572232696 | t3m_01052 | Protein_length | 136aa                                                                                           |          |
| 2572232696 | t3m_01052 | GC             |                                                                                                 | 0.63     |
| 2572232697 | t3m_01053 | Locus_type     | CDS                                                                                             |          |
| 2572232697 | t3m_01053 | Product_name   | hypothetical protein                                                                            |          |
| 2572232697 | t3m_01053 | Scaffold       | t3m_contig_70_162_len_30467_read_count_2413924.21                                               |          |
| 2572232697 | t3m_01053 | Coordinates    | 28769..29338(-)                                                                                 |          |
| 2572232697 | t3m_01053 | DNA_length     | 570bp                                                                                           |          |
| 2572232697 | t3m_01053 | Protein_length | 189aa                                                                                           |          |
| 2572232697 | t3m_01053 | GC             |                                                                                                 | 0.68     |
| 2572232698 | t3m_01054 | Metacyc        | PWY-6739: pinitol biosynthesis II                                                               |          |
| 2572232698 | t3m_01054 | Metacyc        | PWY-6151: <i>S</i>-adenosyl-L-methionine cycle I                                                |          |
| 2572232698 | t3m_01054 | Metacyc        | PWY-5975: furaneol biosynthesis                                                                 |          |
| 2572232698 | t3m_01054 | Metacyc        | PWY-5882: epoxypseudoisoeugenol-2-methylbutyrate biosynthesis                                   |          |
| 2572232698 | t3m_01054 | Metacyc        | PWY-6835: 6-gingerol biosynthesis                                                               |          |
| 2572232698 | t3m_01054 | Metacyc        | PWY-7150: polymethylated quercetin glucoside biosynthesis I - quercetin series (Chrysosplenium) |          |

|            |           |         |                                                                                               |
|------------|-----------|---------|-----------------------------------------------------------------------------------------------|
| 2572232698 | t3m_01054 | Metacyc | PWY-7160: polymethylated myricetin biosynthesis (tomato)                                      |
| 2572232698 | t3m_01054 | Metacyc | PWY-6427: rot-2'-enonate biosynthesis                                                         |
| 2572232698 | t3m_01054 | Metacyc | PWY-5287: sanguinarine and macarpine biosynthesis                                             |
| 2572232698 | t3m_01054 | Metacyc | PWY-5290: secologanin and strictosidine biosynthesis                                          |
| 2572232698 | t3m_01054 | Metacyc | PWY-6424: sitosterol biosynthesis                                                             |
| 2572232698 | t3m_01054 | Metacyc | PWY-3542: choline biosynthesis II                                                             |
| 2572232698 | t3m_01054 | Metacyc | METH-ACETATE-PWY: methanogenesis from acetate                                                 |
| 2572232698 | t3m_01054 | Metacyc | PWY-6477: gibberellin inactivation II (methylation)                                           |
| 2572232698 | t3m_01054 | Metacyc | PWY-5041: <i>S</i> -adenosyl-L-methionine cycle II                                            |
| 2572232698 | t3m_01054 | Metacyc | PWY-7076: 3,5-dimethoxytoluene biosynthesis                                                   |
| 2572232698 | t3m_01054 | Metacyc | PWY-5665: vanilla biosynthesis                                                                |
| 2572232698 | t3m_01054 | Metacyc | PWY-5135: xanthohumol biosynthesis                                                            |
| 2572232698 | t3m_01054 | Metacyc | PWY-7149: superpathway polymethylated quercetin/quercetagenin glucoside biosynthesis (Chryso) |
| 2572232698 | t3m_01054 | Metacyc | PWY-5391: syringetin biosynthesis                                                             |
| 2572232698 | t3m_01054 | Metacyc | PWY-5987: sorgoleone biosynthesis                                                             |
| 2572232698 | t3m_01054 | Metacyc | PWY-7058: esculetin modification                                                              |
| 2572232698 | t3m_01054 | Metacyc | PWY-7138: noscapine biosynthesis                                                              |
| 2572232698 | t3m_01054 | Metacyc | PWY-7135: emetine biosynthesis                                                                |
| 2572232698 | t3m_01054 | Metacyc | PWY-6933: seleno-amino acid detoxification and volatilization III                             |
| 2572232698 | t3m_01054 | Metacyc | PWY-6154: autoinducer AI-2 biosynthesis II ( <i>Vibrio</i> )                                  |
| 2572232698 | t3m_01054 | Metacyc | PWY-6153: autoinducer AI-2 biosynthesis I                                                     |
| 2572232698 | t3m_01054 | Metacyc | PWY-6978: plastoquinol-9 biosynthesis II                                                      |
| 2572232698 | t3m_01054 | Metacyc | PWY-5209: methyl-coenzyme M oxidation to CO <sub>2</sub>                                      |
| 2572232698 | t3m_01054 | Metacyc | PWY-6973: dTDP-D-olivose, dTDP-D-oliose and dTDP-D-mycarose biosynthesis                      |
| 2572232698 | t3m_01054 | Metacyc | PWY-6976: dTDP-L-mycarose biosynthesis                                                        |
| 2572232698 | t3m_01054 | Metacyc | PWY-6303: methyl indole-3-acetate interconversion                                             |
| 2572232698 | t3m_01054 | Metacyc | PWY-6955: lincomycin biosynthesis                                                             |
| 2572232698 | t3m_01054 | Metacyc | PWY-7055: daphnetin modification                                                              |
| 2572232698 | t3m_01054 | Metacyc | PWY-5479: podophyllotoxin and 6-methoxypodophyllotoxin biosynthesis                           |
| 2572232698 | t3m_01054 | Metacyc | PWY-5748: $\gamma$ -coniciene and coniine biosynthesis                                        |
| 2572232698 | t3m_01054 | Metacyc | PWY-5305: bixin biosynthesis                                                                  |
| 2572232698 | t3m_01054 | Metacyc | PWY-1422: vitamin E biosynthesis                                                              |
| 2572232698 | t3m_01054 | Metacyc | PWY-7104: dTDP-L-megosamine biosynthesis                                                      |
| 2572232698 | t3m_01054 | Metacyc | PWY-6650: juvenile hormone III biosynthesis II                                                |

|            |           |         |                                                                                                   |
|------------|-----------|---------|---------------------------------------------------------------------------------------------------|
| 2572232698 | t3m_01054 | Metacyc | PWY-6682: dehydrophos biosynthesis                                                                |
| 2572232698 | t3m_01054 | Metacyc | PWY-6442: spermidine hydroxycinnamic acid conjugates biosynthesis                                 |
| 2572232698 | t3m_01054 | Metacyc | PWY-7097: vanillin and vanillate degradation I                                                    |
| 2572232698 | t3m_01054 | Metacyc | PWY-4021: $\beta$ -alanine betaine biosynthesis                                                   |
| 2572232698 | t3m_01054 | Metacyc | PWY-7045: mithramycin biosynthesis                                                                |
| 2572232698 | t3m_01054 | Metacyc | PWY-7161: polymethylated quercetin biosynthesis                                                   |
| 2572232698 | t3m_01054 | Metacyc | PWY-7157: eupatolitin 3-O-glucoside biosynthesis                                                  |
| 2572232698 | t3m_01054 | Metacyc | PWY-5867: anethole biosynthesis                                                                   |
| 2572232698 | t3m_01054 | Metacyc | PWY-5467: gramine biosynthesis                                                                    |
| 2572232698 | t3m_01054 | Metacyc | PWY-1581: plastoquinol-9 biosynthesis I                                                           |
| 2572232698 | t3m_01054 | Metacyc | PWY-6052: dimethylsulfoniopropionate degradation III (demethylation)                              |
| 2572232698 | t3m_01054 | Metacyc | PWY-6736: sulfur volatiles biosynthesis                                                           |
| 2572232698 | t3m_01054 | Metacyc | PWY-6666: pyocyanin biosynthesis                                                                  |
| 2572232698 | t3m_01054 | Metacyc | PWY-5729: vestitol and sativan biosynthesis                                                       |
| 2572232698 | t3m_01054 | Metacyc | PWY-5846: colchicine biosynthesis                                                                 |
| 2572232698 | t3m_01054 | Metacyc | PWY-6581: spirilloxanthin and 2,2'-diketo-spirilloxanthin biosynthesis                            |
| 2572232698 | t3m_01054 | Metacyc | PWY-4942: cyclopropane and cyclopropene fatty acid biosynthesis                                   |
| 2572232698 | t3m_01054 | Metacyc | PWY-6339: syringate degradation                                                                   |
| 2572232698 | t3m_01054 | Metacyc | PWY-7186: superpathway of scopolin and esculin biosynthesis                                       |
| 2572232698 | t3m_01054 | Metacyc | PWY-5876: magnoflorine biosynthesis                                                               |
| 2572232698 | t3m_01054 | Metacyc | PWYG-321: mycolate biosynthesis                                                                   |
| 2572232698 | t3m_01054 | Metacyc | PWY-5507: adenosylcobalamin biosynthesis I (early cobalt insertion)                               |
| 2572232698 | t3m_01054 | Metacyc | METHIONINE-DEG1-PWY: methionine degradation I (to homocysteine)                                   |
| 2572232698 | t3m_01054 | Metacyc | PWY-6045: methylthiopropionate degradation II (demethylation)                                     |
| 2572232698 | t3m_01054 | Metacyc | PWY-1061: homogalacturonan biosynthesis                                                           |
| 2572232698 | t3m_01054 | Metacyc | PWY-6575: juvenile hormone III biosynthesis I                                                     |
| 2572232698 | t3m_01054 | Metacyc | PWY-702: methionine biosynthesis II                                                               |
| 2572232698 | t3m_01054 | Metacyc | PWY-5765: 1,3,5-trimethoxybenzene biosynthesis                                                    |
| 2572232698 | t3m_01054 | Metacyc | PWY-7025: gentamicin biosynthesis                                                                 |
| 2572232698 | t3m_01054 | Metacyc | PWY-7151: polymethylated quercetin glucoside biosynthesis II - quercetagetin series (Chryso splen |
| 2572232698 | t3m_01054 | Metacyc | PWY-7163: polymethylated kaempferol biosynthesis                                                  |
| 2572232698 | t3m_01054 | Metacyc | PWY-6631: O-methylation of tricetin                                                               |
| 2572232698 | t3m_01054 | Metacyc | PWY-7079: geodin biosynthesis                                                                     |
| 2572232698 | t3m_01054 | Metacyc | PWY-6286: spheridene and spheridenone biosynthesis                                                |



|            |           |                |                                                                     |          |
|------------|-----------|----------------|---------------------------------------------------------------------|----------|
| 2572232698 | t3m_01054 | Metacyc        | PWY-5773: gossypol biosynthesis                                     |          |
| 2572232698 | t3m_01054 | COG_category   | [H] Coenzyme transport and metabolism                               |          |
| 2572232698 | t3m_01054 | COG2226        | Methylase involved in ubiquinone/menaquinone biosynthesis           | 6.00E-16 |
| 2572232698 | t3m_01054 | pfam08242      | Methyltransf_12                                                     | 1.50E-16 |
| 2572232698 | t3m_01054 | EC:2.1.1.-     | Transferases. Transferring one-carbon groups. Methyltransferases.   |          |
| 2572232698 | t3m_01054 | KO:K15256      | tRNA (cmo5U34)-methyltransferase [EC:2.1.1.-]                       | 1.50E-27 |
| 2572232698 | t3m_01054 | Locus_type     | CDS                                                                 |          |
| 2572232698 | t3m_01054 | Product_name   | Methylase involved in ubiquinone/menaquinone biosynthesis           |          |
| 2572232698 | t3m_01054 | Scaffold       | t3m_contig_70_162_len_30467_read_count_2413924.21                   |          |
| 2572232698 | t3m_01054 | Coordinates    | 29579..30247(+)                                                     |          |
| 2572232698 | t3m_01054 | DNA_length     | 669bp                                                               |          |
| 2572232698 | t3m_01054 | Protein_length | 222aa                                                               |          |
| 2572232698 | t3m_01054 | GC             |                                                                     | 0.7      |
| 2572232699 | t3m_01055 | pfam03590      | AsnA                                                                | 4.60E-21 |
| 2572232699 | t3m_01055 | Locus_type     | CDS                                                                 |          |
| 2572232699 | t3m_01055 | Product_name   | Aspartate-ammonia ligase                                            |          |
| 2572232699 | t3m_01055 | Scaffold       | t3m_contig_70_173_len_29101_read_count_2611096.22                   |          |
| 2572232699 | t3m_01055 | Coordinates    | 1..486(+)                                                           |          |
| 2572232699 | t3m_01055 | DNA_length     | 486bp                                                               |          |
| 2572232699 | t3m_01055 | Protein_length | 161aa                                                               |          |
| 2572232699 | t3m_01055 | GC             |                                                                     | 0.66     |
| 2572232700 | t3m_01056 | KEGG_module    | M00125: Riboflavin biosynthesis, GTP => riboflavin/FMN/FAD          |          |
| 2572232700 | t3m_01056 | Metacyc        | RIBOSYN2-PWY: flavin biosynthesis I (bacteria and plants)           |          |
| 2572232700 | t3m_01056 | Metacyc        | PWY-6167: flavin biosynthesis II (archaea)                          |          |
| 2572232700 | t3m_01056 | Metacyc        | PWY-6168: flavin biosynthesis III (fungi)                           |          |
| 2572232700 | t3m_01056 | IMG_pathway    | 291: 5-amino-6-ribitylamino-2,4(1H,3H)-pyrimidinedione biosynthesis |          |
| 2572232700 | t3m_01056 | COG_category   | [H] Coenzyme transport and metabolism                               |          |
| 2572232700 | t3m_01056 | COG0807        | GTP cyclohydrolase II                                               | 3.00E-62 |
| 2572232700 | t3m_01056 | pfam00925      | GTP_cyclohydro2                                                     | 1.80E-64 |
| 2572232700 | t3m_01056 | EC:3.5.4.25    | GTP cyclohydrolase II.                                              |          |
| 2572232700 | t3m_01056 | EC:4.1.99.12   | 3,4-dihydroxy-2-butanone-4-phosphate synthase.                      |          |
| 2572232700 | t3m_01056 | TIGR00505      | GTP cyclohydrolase II                                               | 7.50E-76 |

|            |           |                |                                                                      |          |
|------------|-----------|----------------|----------------------------------------------------------------------|----------|
| 2572232700 | t3m_01056 | KO:K14652      | 3,4-dihydroxy 2-butanone 4-phosphate synthase / GTP cyclohydrolase I | 0.00E+00 |
| 2572232700 | t3m_01056 | ITERM:00567    | GTP cyclohydrolase II (EC 3.5.4.25)                                  |          |
| 2572232700 | t3m_01056 | Locus_type     | CDS                                                                  |          |
| 2572232700 | t3m_01056 | Product_name   | GTP cyclohydrolase II (EC 3.5.4.25)                                  |          |
| 2572232700 | t3m_01056 | Scaffold       | t3m_contig_70_173_len_29101_read_count_2611096.22                    |          |
| 2572232700 | t3m_01056 | Coordinates    | 596..1300(+)                                                         |          |
| 2572232700 | t3m_01056 | DNA_length     | 705bp                                                                |          |
| 2572232700 | t3m_01056 | Protein_length | 234aa                                                                |          |
| 2572232700 | t3m_01056 | GC             |                                                                      | 0.67     |
|            |           |                |                                                                      |          |
| 2572232701 | t3m_01057 | pfam13229      | Beta_helix                                                           | 3.10E-11 |
| 2572232701 | t3m_01057 | pfam05317      | Thermopsin                                                           | 1.50E-60 |
| 2572232701 | t3m_01057 | Locus_type     | CDS                                                                  |          |
| 2572232701 | t3m_01057 | Product_name   | Thermopsin/Right handed beta helix region                            |          |
| 2572232701 | t3m_01057 | Scaffold       | t3m_contig_70_173_len_29101_read_count_2611096.22                    |          |
| 2572232701 | t3m_01057 | Coordinates    | 1429..6351(-)                                                        |          |
| 2572232701 | t3m_01057 | DNA_length     | 4923bp                                                               |          |
| 2572232701 | t3m_01057 | Protein_length | 1640aa                                                               |          |
| 2572232701 | t3m_01057 | GC             |                                                                      | 0.63     |
| 2572232701 | t3m_01057 | Transmembrane  | Yes                                                                  |          |
|            |           |                |                                                                      |          |
| 2572232702 | t3m_01058 | pfam03473      | MOSC                                                                 | 2.80E-17 |
| 2572232702 | t3m_01058 | Locus_type     | CDS                                                                  |          |
| 2572232702 | t3m_01058 | Product_name   | MOSC domain                                                          |          |
| 2572232702 | t3m_01058 | Scaffold       | t3m_contig_70_173_len_29101_read_count_2611096.22                    |          |
| 2572232702 | t3m_01058 | Coordinates    | 6510..6983(-)                                                        |          |
| 2572232702 | t3m_01058 | DNA_length     | 474bp                                                                |          |
| 2572232702 | t3m_01058 | Protein_length | 157aa                                                                |          |
| 2572232702 | t3m_01058 | GC             |                                                                      | 0.66     |
|            |           |                |                                                                      |          |
| 2572232703 | t3m_01059 | Locus_type     | CDS                                                                  |          |
| 2572232703 | t3m_01059 | Product_name   | hypothetical protein                                                 |          |
| 2572232703 | t3m_01059 | Scaffold       | t3m_contig_70_173_len_29101_read_count_2611096.22                    |          |
| 2572232703 | t3m_01059 | Coordinates    | 7144..7521(+)                                                        |          |

|            |           |                |                                                                  |          |
|------------|-----------|----------------|------------------------------------------------------------------|----------|
| 2572232703 | t3m_01059 | DNA_length     | 378bp                                                            |          |
| 2572232703 | t3m_01059 | Protein_length | 125aa                                                            |          |
| 2572232703 | t3m_01059 | GC             |                                                                  | 0.62     |
| 2572232703 | t3m_01059 | Transmembrane  | Yes                                                              |          |
| 2572232704 | t3m_01060 | COG_category   | [E] Amino acid transport and metabolism                          |          |
| 2572232704 | t3m_01060 | COG1280        | Putative threonine efflux protein                                | 1.00E-07 |
| 2572232704 | t3m_01060 | pfam01810      | LysE                                                             | 1.40E-21 |
| 2572232704 | t3m_01060 | Locus_type     | CDS                                                              |          |
| 2572232704 | t3m_01060 | Product_name   | Putative threonine efflux protein                                |          |
| 2572232704 | t3m_01060 | Scaffold       | t3m_contig_70_173_len_29101_read_count_2611096.22                |          |
| 2572232704 | t3m_01060 | Coordinates    | 7591..8169(+)                                                    |          |
| 2572232704 | t3m_01060 | DNA_length     | 579bp                                                            |          |
| 2572232704 | t3m_01060 | Protein_length | 192aa                                                            |          |
| 2572232704 | t3m_01060 | GC             |                                                                  | 0.67     |
| 2572232704 | t3m_01060 | Transmembrane  | Yes                                                              |          |
| 2572232705 | t3m_01061 | COG_category   | [O] Posttranslational modification, protein turnover, chaperones |          |
| 2572232705 | t3m_01061 | COG0225        | Peptide methionine sulfoxide reductase                           | 1.00E-63 |
| 2572232705 | t3m_01061 | pfam01625      | PMSR                                                             | 4.40E-62 |
| 2572232705 | t3m_01061 | EC:1.8.4.11    | Peptide-methionine (S)-S-oxide reductase.                        |          |
| 2572232705 | t3m_01061 | TIGR00401      | methionine-S-sulfoxide reductase                                 | 2.90E-61 |
| 2572232705 | t3m_01061 | KO:K07304      | peptide-methionine (S)-S-oxide reductase [EC:1.8.4.11]           | 0.00E+00 |
| 2572232705 | t3m_01061 | Locus_type     | CDS                                                              |          |
| 2572232705 | t3m_01061 | Product_name   | methionine-S-sulfoxide reductase                                 |          |
| 2572232705 | t3m_01061 | Scaffold       | t3m_contig_70_173_len_29101_read_count_2611096.22                |          |
| 2572232705 | t3m_01061 | Coordinates    | 8194..8760(-)                                                    |          |
| 2572232705 | t3m_01061 | DNA_length     | 567bp                                                            |          |
| 2572232705 | t3m_01061 | Protein_length | 188aa                                                            |          |
| 2572232705 | t3m_01061 | GC             |                                                                  | 0.65     |
| 2572232706 | t3m_01062 | pfam06157      | DUF973                                                           | 9.10E-05 |
| 2572232706 | t3m_01062 | Locus_type     | CDS                                                              |          |
| 2572232706 | t3m_01062 | Product_name   | Protein of unknown function (DUF973)                             |          |

|            |           |                |                                                               |                                                               |           |
|------------|-----------|----------------|---------------------------------------------------------------|---------------------------------------------------------------|-----------|
| 2572232706 | t3m_01062 | Scaffold       |                                                               | t3m_contig_70_173_len_29101_read_count_2611096.22             |           |
| 2572232706 | t3m_01062 | Coordinates    |                                                               | 8838..9608(-)                                                 |           |
| 2572232706 | t3m_01062 | DNA_length     |                                                               | 771bp                                                         |           |
| 2572232706 | t3m_01062 | Protein_length |                                                               | 256aa                                                         |           |
| 2572232706 | t3m_01062 | GC             |                                                               |                                                               | 0.67      |
| 2572232706 | t3m_01062 | Transmembrane  |                                                               | Yes                                                           |           |
| 2572232707 | t3m_01063 | COG_category   | [T] Signal transduction mechanisms                            |                                                               |           |
| 2572232707 | t3m_01063 | COG_category   | [K] Transcription                                             |                                                               |           |
| 2572232707 | t3m_01063 | COG4978        | Transcriptional regulator, effector-binding domain/component  |                                                               | 3.00E-04  |
| 2572232707 | t3m_01063 | pfam06445      | Gyrl-like                                                     |                                                               | 1.30E-06  |
| 2572232707 | t3m_01063 | Locus_type     |                                                               | CDS                                                           |           |
| 2572232707 | t3m_01063 | Product_name   |                                                               | Transcriptional regulator, effector-binding domain/component  |           |
| 2572232707 | t3m_01063 | Scaffold       |                                                               | t3m_contig_70_173_len_29101_read_count_2611096.22             |           |
| 2572232707 | t3m_01063 | Coordinates    |                                                               | 9687..10139(-)                                                |           |
| 2572232707 | t3m_01063 | DNA_length     |                                                               | 453bp                                                         |           |
| 2572232707 | t3m_01063 | Protein_length |                                                               | 150aa                                                         |           |
| 2572232707 | t3m_01063 | GC             |                                                               |                                                               | 0.64      |
| 2572232708 | t3m_01064 | COG_category   | [H] Coenzyme transport and metabolism                         |                                                               |           |
| 2572232708 | t3m_01064 | COG2896        | Molybdenum cofactor biosynthesis enzyme                       |                                                               | 1.00E-75  |
| 2572232708 | t3m_01064 | pfam06463      | Mob_synth_C                                                   |                                                               | 2.90E-23  |
| 2572232708 | t3m_01064 | pfam04055      | Radical_SAM                                                   |                                                               | 1.50E-23  |
| 2572232708 | t3m_01064 | pfam13394      | Fer4_14                                                       |                                                               | 1.20E-08  |
| 2572232708 | t3m_01064 | TIGR02668      | probable molybdenum cofactor biosynthesis protein A, archaeal |                                                               | 1.80E-107 |
| 2572232708 | t3m_01064 | KO:K03639      | molybdenum cofactor biosynthesis protein                      |                                                               | 0.00E+00  |
| 2572232708 | t3m_01064 | Locus_type     |                                                               | CDS                                                           |           |
| 2572232708 | t3m_01064 | Product_name   |                                                               | probable molybdenum cofactor biosynthesis protein A, archaeal |           |
| 2572232708 | t3m_01064 | Scaffold       |                                                               | t3m_contig_70_173_len_29101_read_count_2611096.22             |           |
| 2572232708 | t3m_01064 | Coordinates    |                                                               | 10275..11261(-)                                               |           |
| 2572232708 | t3m_01064 | DNA_length     |                                                               | 987bp                                                         |           |
| 2572232708 | t3m_01064 | Protein_length |                                                               | 328aa                                                         |           |
| 2572232708 | t3m_01064 | GC             |                                                               |                                                               | 0.66      |

|            |           |                |                                                       |          |
|------------|-----------|----------------|-------------------------------------------------------|----------|
| 2572232709 | t3m_01065 | KEGG_module    | M00254: ABC-2 type transport system                   |          |
| 2572232709 | t3m_01065 | COG_category   | [V] Defense mechanisms                                |          |
| 2572232709 | t3m_01065 | COG1131        | ABC-type multidrug transport system, ATPase component | 2.00E-70 |
| 2572232709 | t3m_01065 | pfam00005      | ABC_tran                                              | 3.60E-29 |
| 2572232709 | t3m_01065 | KO:K01990      | ABC-2 type transport system ATP-binding protein       | 0.00E+00 |
| 2572232709 | t3m_01065 | Locus_type     | CDS                                                   |          |
| 2572232709 | t3m_01065 | Product_name   | ABC-type multidrug transport system, ATPase component |          |
| 2572232709 | t3m_01065 | Scaffold       | t3m_contig_70_173_len_29101_read_count_2611096.22     |          |
| 2572232709 | t3m_01065 | Coordinates    | 11419..12264(+)                                       |          |
| 2572232709 | t3m_01065 | DNA_length     | 846bp                                                 |          |
| 2572232709 | t3m_01065 | Protein_length | 281aa                                                 |          |
| 2572232709 | t3m_01065 | GC             |                                                       | 0.68     |
|            |           |                |                                                       |          |
| 2572232710 | t3m_01066 | Locus_type     | CDS                                                   |          |
| 2572232710 | t3m_01066 | Product_name   | hypothetical protein                                  |          |
| 2572232710 | t3m_01066 | Scaffold       | t3m_contig_70_173_len_29101_read_count_2611096.22     |          |
| 2572232710 | t3m_01066 | Coordinates    | 12272..13870(+)                                       |          |
| 2572232710 | t3m_01066 | DNA_length     | 1599bp                                                |          |
| 2572232710 | t3m_01066 | Protein_length | 532aa                                                 |          |
| 2572232710 | t3m_01066 | GC             |                                                       | 0.69     |
| 2572232710 | t3m_01066 | Transmembrane  | Yes                                                   |          |
|            |           |                |                                                       |          |
| 2572232711 | t3m_01067 | Locus_type     | CDS                                                   |          |
| 2572232711 | t3m_01067 | Product_name   | hypothetical protein                                  |          |
| 2572232711 | t3m_01067 | Scaffold       | t3m_contig_70_173_len_29101_read_count_2611096.22     |          |
| 2572232711 | t3m_01067 | Coordinates    | 13886..14365(-)                                       |          |
| 2572232711 | t3m_01067 | DNA_length     | 480bp                                                 |          |
| 2572232711 | t3m_01067 | Protein_length | 159aa                                                 |          |
| 2572232711 | t3m_01067 | GC             |                                                       | 0.7      |
|            |           |                |                                                       |          |
| 2572232712 | t3m_01068 | COG_category   | [L] Replication, recombination and repair             |          |
| 2572232712 | t3m_01068 | COG4912        | Predicted DNA alkylation repair enzyme                | 1.00E-07 |
| 2572232712 | t3m_01068 | pfam08713      | DNA_alkylation                                        | 3.10E-36 |
| 2572232712 | t3m_01068 | Locus_type     | CDS                                                   |          |

|            |           |                |                                                   |          |
|------------|-----------|----------------|---------------------------------------------------|----------|
| 2572232712 | t3m_01068 | Product_name   | Predicted DNA alkylation repair enzyme            |          |
| 2572232712 | t3m_01068 | Scaffold       | t3m_contig_70_173_len_29101_read_count_2611096.22 |          |
| 2572232712 | t3m_01068 | Coordinates    | 14390..15157(-)                                   |          |
| 2572232712 | t3m_01068 | DNA_length     | 768bp                                             |          |
| 2572232712 | t3m_01068 | Protein_length | 255aa                                             |          |
| 2572232712 | t3m_01068 | GC             |                                                   | 0.71     |
|            |           |                |                                                   |          |
| 2572232713 | t3m_01069 | pfam01401      | Peptidase_M2                                      | 0.00E+00 |
| 2572232713 | t3m_01069 | EC:3.4.15.1    | Peptidyl-dipeptidase A.                           |          |
| 2572232713 | t3m_01069 | KO:K01283      | peptidyl-dipeptidase A [EC:3.4.15.1]              | 0.00E+00 |
| 2572232713 | t3m_01069 | Locus_type     | CDS                                               |          |
| 2572232713 | t3m_01069 | Product_name   | Angiotensin-converting enzyme                     |          |
| 2572232713 | t3m_01069 | Scaffold       | t3m_contig_70_173_len_29101_read_count_2611096.22 |          |
| 2572232713 | t3m_01069 | Coordinates    | 15151..16932(-)                                   |          |
| 2572232713 | t3m_01069 | DNA_length     | 1782bp                                            |          |
| 2572232713 | t3m_01069 | Protein_length | 593aa                                             |          |
| 2572232713 | t3m_01069 | GC             |                                                   | 0.67     |
|            |           |                |                                                   |          |
| 2572232714 | t3m_01070 | Locus_type     | CDS                                               |          |
| 2572232714 | t3m_01070 | Product_name   | hypothetical protein                              |          |
| 2572232714 | t3m_01070 | Scaffold       | t3m_contig_70_173_len_29101_read_count_2611096.22 |          |
| 2572232714 | t3m_01070 | Coordinates    | 17071..17223(+)                                   |          |
| 2572232714 | t3m_01070 | DNA_length     | 153bp                                             |          |
| 2572232714 | t3m_01070 | Protein_length | 50aa                                              |          |
| 2572232714 | t3m_01070 | GC             |                                                   | 0.66     |
|            |           |                |                                                   |          |
| 2572232715 | t3m_01071 | Locus_type     | CDS                                               |          |
| 2572232715 | t3m_01071 | Product_name   | hypothetical protein                              |          |
| 2572232715 | t3m_01071 | Scaffold       | t3m_contig_70_173_len_29101_read_count_2611096.22 |          |
| 2572232715 | t3m_01071 | Coordinates    | 17220..17441(+)                                   |          |
| 2572232715 | t3m_01071 | DNA_length     | 222bp                                             |          |
| 2572232715 | t3m_01071 | Protein_length | 73aa                                              |          |
| 2572232715 | t3m_01071 | GC             |                                                   | 0.7      |

|            |           |                |                                                                     |          |
|------------|-----------|----------------|---------------------------------------------------------------------|----------|
| 2572232716 | t3m_01072 | COG_category   | [L] Replication, recombination and repair                           |          |
| 2572232716 | t3m_01072 | COG0328        | Ribonuclease HI                                                     | 4.00E-16 |
| 2572232716 | t3m_01072 | pfam13456      | RVT_3                                                               | 1.10E-20 |
| 2572232716 | t3m_01072 | EC:3.1.26.4    | Ribonuclease H.                                                     |          |
| 2572232716 | t3m_01072 | KO:K03469      | ribonuclease HI [EC:3.1.26.4]                                       | 1.60E-27 |
| 2572232716 | t3m_01072 | Locus_type     | CDS                                                                 |          |
| 2572232716 | t3m_01072 | Product_name   | Ribonuclease HI                                                     |          |
| 2572232716 | t3m_01072 | Scaffold       | t3m_contig_70_173_len_29101_read_count_2611096.22                   |          |
| 2572232716 | t3m_01072 | Coordinates    | 17465..18016(-)                                                     |          |
| 2572232716 | t3m_01072 | DNA_length     | 552bp                                                               |          |
| 2572232716 | t3m_01072 | Protein_length | 183aa                                                               |          |
| 2572232716 | t3m_01072 | GC             |                                                                     | 0.68     |
| 2572232717 | t3m_01073 | Locus_type     | CDS                                                                 |          |
| 2572232717 | t3m_01073 | Product_name   | hypothetical protein                                                |          |
| 2572232717 | t3m_01073 | Scaffold       | t3m_contig_70_173_len_29101_read_count_2611096.22                   |          |
| 2572232717 | t3m_01073 | Coordinates    | 18013..18528(-)                                                     |          |
| 2572232717 | t3m_01073 | DNA_length     | 516bp                                                               |          |
| 2572232717 | t3m_01073 | Protein_length | 171aa                                                               |          |
| 2572232717 | t3m_01073 | GC             |                                                                     | 0.7      |
| 2572232717 | t3m_01073 | Transmembrane  | Yes                                                                 |          |
| 2572232718 | t3m_01074 | COG_category   | [O] Posttranslational modification, protein turnover, chaperones    |          |
| 2572232718 | t3m_01074 | COG0652        | Peptidyl-prolyl cis-trans isomerase (rotamase) - cyclophilin family | 7.00E-51 |
| 2572232718 | t3m_01074 | pfam00160      | Pro_isomerase                                                       | 1.60E-53 |
| 2572232718 | t3m_01074 | EC:5.2.1.8     | Peptidylprolyl isomerase.                                           |          |
| 2572232718 | t3m_01074 | KO:K03767      | peptidyl-prolyl cis-trans isomerase A (cyclophilin A) [EC:5.2.1.8]  | 0.00E+00 |
| 2572232718 | t3m_01074 | Locus_type     | CDS                                                                 |          |
| 2572232718 | t3m_01074 | Product_name   | Peptidyl-prolyl cis-trans isomerase (rotamase) - cyclophilin family |          |
| 2572232718 | t3m_01074 | Scaffold       | t3m_contig_70_173_len_29101_read_count_2611096.22                   |          |
| 2572232718 | t3m_01074 | Coordinates    | 18640..19110(+)                                                     |          |
| 2572232718 | t3m_01074 | DNA_length     | 471bp                                                               |          |
| 2572232718 | t3m_01074 | Protein_length | 156aa                                                               |          |
| 2572232718 | t3m_01074 | GC             |                                                                     | 0.67     |

|            |           |                |                                                       |          |
|------------|-----------|----------------|-------------------------------------------------------|----------|
| 2572232719 | t3m_01075 | Locus_type     | CDS                                                   |          |
| 2572232719 | t3m_01075 | Product_name   | hypothetical protein                                  |          |
| 2572232719 | t3m_01075 | Scaffold       | t3m_contig_70_173_len_29101_read_count_2611096.22     |          |
| 2572232719 | t3m_01075 | Coordinates    | 19122..19622(-)                                       |          |
| 2572232719 | t3m_01075 | DNA_length     | 501bp                                                 |          |
| 2572232719 | t3m_01075 | Protein_length | 166aa                                                 |          |
| 2572232719 | t3m_01075 | GC             |                                                       | 0.65     |
| 2572232719 | t3m_01075 | Transmembrane  | Yes                                                   |          |
|            |           |                |                                                       |          |
| 2572232720 | t3m_01076 | Locus_type     | CDS                                                   |          |
| 2572232720 | t3m_01076 | Product_name   | hypothetical protein                                  |          |
| 2572232720 | t3m_01076 | Scaffold       | t3m_contig_70_173_len_29101_read_count_2611096.22     |          |
| 2572232720 | t3m_01076 | Coordinates    | 19619..20371(-)                                       |          |
| 2572232720 | t3m_01076 | DNA_length     | 753bp                                                 |          |
| 2572232720 | t3m_01076 | Protein_length | 250aa                                                 |          |
| 2572232720 | t3m_01076 | GC             |                                                       | 0.67     |
| 2572232720 | t3m_01076 | Transmembrane  | Yes                                                   |          |
|            |           |                |                                                       |          |
| 2572232721 | t3m_01077 | Locus_type     | CDS                                                   |          |
| 2572232721 | t3m_01077 | Product_name   | hypothetical protein                                  |          |
| 2572232721 | t3m_01077 | Scaffold       | t3m_contig_70_173_len_29101_read_count_2611096.22     |          |
| 2572232721 | t3m_01077 | Coordinates    | 20722..20865(+)                                       |          |
| 2572232721 | t3m_01077 | DNA_length     | 144bp                                                 |          |
| 2572232721 | t3m_01077 | Protein_length | 47aa                                                  |          |
| 2572232721 | t3m_01077 | GC             |                                                       | 0.69     |
|            |           |                |                                                       |          |
| 2572232722 | t3m_01078 | COG_category   | [C] Energy production and conversion                  |          |
| 2572232722 | t3m_01078 | COG1902        | NADH:flavin oxidoreductases, Old Yellow Enzyme family | 1.00E-82 |
| 2572232722 | t3m_01078 | pfam00724      | Oxidored_FMN                                          | 6.60E-06 |
| 2572232722 | t3m_01078 | pfam00724      | Oxidored_FMN                                          | 3.90E-64 |
| 2572232722 | t3m_01078 | Locus_type     | CDS                                                   |          |
| 2572232722 | t3m_01078 | Product_name   | NADH:flavin oxidoreductases, Old Yellow Enzyme family |          |
| 2572232722 | t3m_01078 | Scaffold       | t3m_contig_70_173_len_29101_read_count_2611096.22     |          |



|            |           |                |                                                         |           |
|------------|-----------|----------------|---------------------------------------------------------|-----------|
| 2572232722 | t3m_01078 | Coordinates    | 21010..22128(-)                                         |           |
| 2572232722 | t3m_01078 | DNA_length     | 1119bp                                                  |           |
| 2572232722 | t3m_01078 | Protein_length | 372aa                                                   |           |
| 2572232722 | t3m_01078 | GC             |                                                         | 0.69      |
|            |           |                |                                                         |           |
| 2572232723 | t3m_01079 | Locus_type     | CDS                                                     |           |
| 2572232723 | t3m_01079 | Product_name   | hypothetical protein                                    |           |
| 2572232723 | t3m_01079 | Scaffold       | t3m_contig_70_173_len_29101_read_count_2611096.22       |           |
| 2572232723 | t3m_01079 | Coordinates    | 22482..24776(-)                                         |           |
| 2572232723 | t3m_01079 | DNA_length     | 2295bp                                                  |           |
| 2572232723 | t3m_01079 | Protein_length | 764aa                                                   |           |
| 2572232723 | t3m_01079 | GC             |                                                         | 0.66      |
| 2572232723 | t3m_01079 | Transmembrane  | Yes                                                     |           |
|            |           |                |                                                         |           |
| 2572232724 | t3m_01080 | Locus_type     | tRNA                                                    |           |
| 2572232724 | t3m_01080 | Product_name   | tRNA_Thr_CGT                                            |           |
| 2572232724 | t3m_01080 | Scaffold       | t3m_contig_70_173_len_29101_read_count_2611096.22       |           |
| 2572232724 | t3m_01080 | Coordinates    | 24980..25053(-)                                         |           |
| 2572232724 | t3m_01080 | DNA_length     | 74bp                                                    |           |
| 2572232724 | t3m_01080 | GC             |                                                         | 0.59      |
|            |           |                |                                                         |           |
| 2572232725 | t3m_01081 | Metacyc        | PWY-701: methionine degradation II                      |           |
| 2572232725 | t3m_01081 | COG_category   | [E] Amino acid transport and metabolism                 |           |
| 2572232725 | t3m_01081 | COG0626        | Cystathionine beta-lyases/cystathionine gamma-synthases | 3.00E-115 |
| 2572232725 | t3m_01081 | pfam01053      | Cys_Met_Meta_PP                                         | 6.20E-119 |
| 2572232725 | t3m_01081 | EC:4.4.1.11    | Methionine gamma-lyase.                                 |           |
| 2572232725 | t3m_01081 | KO:K01761      | methionine-gamma-lyase [EC:4.4.1.11]                    | 0.00E+00  |
| 2572232725 | t3m_01081 | Locus_type     | CDS                                                     |           |
| 2572232725 | t3m_01081 | Product_name   | Cystathionine beta-lyases/cystathionine gamma-synthases |           |
| 2572232725 | t3m_01081 | Scaffold       | t3m_contig_70_173_len_29101_read_count_2611096.22       |           |
| 2572232725 | t3m_01081 | Coordinates    | 25103..26332(-)                                         |           |
| 2572232725 | t3m_01081 | DNA_length     | 1230bp                                                  |           |
| 2572232725 | t3m_01081 | Protein_length | 409aa                                                   |           |
| 2572232725 | t3m_01081 | GC             |                                                         | 0.69      |

|            |           |                |                                                                                  |          |
|------------|-----------|----------------|----------------------------------------------------------------------------------|----------|
| 2572232726 | t3m_01082 | Metacyc        | NAD-BIOSYNTHESIS-III: NAD biosynthesis III                                       |          |
| 2572232726 | t3m_01082 | Metacyc        | PWY30-4106: NAD salvage pathway III                                              |          |
| 2572232726 | t3m_01082 | COG_category   | [H] Coenzyme transport and metabolism                                            |          |
| 2572232726 | t3m_01082 | COG1056        | Nicotinamide mononucleotide adenylyltransferase                                  | 2.00E-39 |
| 2572232726 | t3m_01082 | pfam01467      | CTP_transf_2                                                                     | 2.40E-10 |
| 2572232726 | t3m_01082 | EC:2.7.7.1     | Nicotinamide-nucleotide adenylyltransferase.                                     |          |
| 2572232726 | t3m_01082 | TIGR01527      | nicotinamide-nucleotide adenylyltransferase                                      | 6.30E-55 |
| 2572232726 | t3m_01082 | TIGR00125      | cytidyltransferase-like domain                                                   | 5.60E-12 |
| 2572232726 | t3m_01082 | KO:K00952      | nicotinamide-nucleotide adenylyltransferase [EC:2.7.7.1]                         | 4.90E-40 |
| 2572232726 | t3m_01082 | Locus_type     | CDS                                                                              |          |
| 2572232726 | t3m_01082 | Product_name   | cytidyltransferase-like domain                                                   |          |
| 2572232726 | t3m_01082 | Scaffold       | t3m_contig_70_173_len_29101_read_count_2611096.22                                |          |
| 2572232726 | t3m_01082 | Coordinates    | 26329..26880(-)                                                                  |          |
| 2572232726 | t3m_01082 | DNA_length     | 552bp                                                                            |          |
| 2572232726 | t3m_01082 | Protein_length | 183aa                                                                            |          |
| 2572232726 | t3m_01082 | GC             |                                                                                  | 0.68     |
| 2572232727 | t3m_01083 | Locus_type     | CDS                                                                              |          |
| 2572232727 | t3m_01083 | Product_name   | hypothetical protein                                                             |          |
| 2572232727 | t3m_01083 | Scaffold       | t3m_contig_70_173_len_29101_read_count_2611096.22                                |          |
| 2572232727 | t3m_01083 | Coordinates    | 26881..27126(-)                                                                  |          |
| 2572232727 | t3m_01083 | DNA_length     | 246bp                                                                            |          |
| 2572232727 | t3m_01083 | Protein_length | 81aa                                                                             |          |
| 2572232727 | t3m_01083 | GC             |                                                                                  | 0.66     |
| 2572232728 | t3m_01084 | COG_category   | [O] Posttranslational modification, protein turnover, chaperones                 |          |
| 2572232728 | t3m_01084 | COG1067        | Predicted ATP-dependent protease                                                 | 0.00E+00 |
| 2572232728 | t3m_01084 | pfam13654      | AAA_32                                                                           | 5.70E-20 |
| 2572232728 | t3m_01084 | pfam05362      | Lon_C                                                                            | 1.20E-30 |
| 2572232728 | t3m_01084 | pfam01078      | Mg_chelatase                                                                     | 5.30E-09 |
| 2572232728 | t3m_01084 | EC:3.4.21.-    | Hydrolases. Acting on peptide bonds (peptide hydrolases). Serine endopeptidases. |          |
| 2572232728 | t3m_01084 | TIGR00764      | lon-related putative ATP-dependent protease                                      | 0.00E+00 |
| 2572232728 | t3m_01084 | KO:K04076      | Lon-like ATP-dependent protease [EC:3.4.21.-]                                    | 0.00E+00 |

|            |           |                |                                                     |                                                   |          |
|------------|-----------|----------------|-----------------------------------------------------|---------------------------------------------------|----------|
| 2572232728 | t3m_01084 | Locus_type     |                                                     | CDS                                               |          |
| 2572232728 | t3m_01084 | Product_name   |                                                     | lon-related putative ATP-dependent protease       |          |
| 2572232728 | t3m_01084 | Scaffold       |                                                     | t3m_contig_70_173_len_29101_read_count_2611096.22 |          |
| 2572232728 | t3m_01084 | Coordinates    |                                                     | 27123..29099(-)                                   |          |
| 2572232728 | t3m_01084 | DNA_length     |                                                     | 1977bp                                            |          |
| 2572232728 | t3m_01084 | Protein_length |                                                     | 658aa                                             |          |
| 2572232728 | t3m_01084 | GC             |                                                     |                                                   | 0.67     |
| 2572232728 | t3m_01084 | Transmembrane  |                                                     | Yes                                               |          |
| 2572232729 | t3m_01085 | pfam00118      | Cpn60_TCP1                                          |                                                   | 3.10E-91 |
| 2572232729 | t3m_01085 | Locus_type     |                                                     | CDS                                               |          |
| 2572232729 | t3m_01085 | Product_name   |                                                     | TCP-1/cpn60 chaperonin family                     |          |
| 2572232729 | t3m_01085 | Scaffold       |                                                     | t3m_contig_70_177_len_28436_read_count_2535366.23 |          |
| 2572232729 | t3m_01085 | Coordinates    |                                                     | 3..905(+)                                         |          |
| 2572232729 | t3m_01085 | DNA_length     |                                                     | 903bp                                             |          |
| 2572232729 | t3m_01085 | Protein_length |                                                     | 300aa                                             |          |
| 2572232729 | t3m_01085 | GC             |                                                     |                                                   | 0.65     |
| 2572232730 | t3m_01086 | Locus_type     |                                                     | CDS                                               |          |
| 2572232730 | t3m_01086 | Product_name   |                                                     | hypothetical protein                              |          |
| 2572232730 | t3m_01086 | Scaffold       |                                                     | t3m_contig_70_177_len_28436_read_count_2535366.23 |          |
| 2572232730 | t3m_01086 | Coordinates    |                                                     | 1008..1409(+)                                     |          |
| 2572232730 | t3m_01086 | DNA_length     |                                                     | 402bp                                             |          |
| 2572232730 | t3m_01086 | Protein_length |                                                     | 133aa                                             |          |
| 2572232730 | t3m_01086 | GC             |                                                     |                                                   | 0.73     |
| 2572232731 | t3m_01087 | KEGG_module    | M00360: Aminoacyl-tRNA biosynthesis, prokaryotes    |                                                   |          |
| 2572232731 | t3m_01087 | KEGG_module    | M00359: Aminoacyl-tRNA biosynthesis, eukaryotes     |                                                   |          |
| 2572232731 | t3m_01087 | Metacyc        | TRNA-CHARGING-PWY: tRNA charging                    |                                                   |          |
| 2572232731 | t3m_01087 | COG_category   | [J] Translation, ribosomal structure and biogenesis |                                                   |          |
| 2572232731 | t3m_01087 | COG1190        | Lysyl-tRNA synthetase (class II)                    |                                                   | 0.00E+00 |
| 2572232731 | t3m_01087 | pfam01336      | tRNA_anti-codon                                     |                                                   | 6.80E-11 |
| 2572232731 | t3m_01087 | pfam00152      | tRNA-synt_2                                         |                                                   | 1.00E-82 |
| 2572232731 | t3m_01087 | EC:6.1.1.6     | Lysine--tRNA ligase.                                |                                                   |          |

|            |           |                |                                                                |          |
|------------|-----------|----------------|----------------------------------------------------------------|----------|
| 2572232731 | t3m_01087 | TIGR00499      | lysyl-tRNA synthetase, eukaryotic and non-spirochete bacterial | 0.00E+00 |
| 2572232731 | t3m_01087 | KO:K04567      | lysyl-tRNA synthetase, class II [EC:6.1.1.6]                   | 0.00E+00 |
| 2572232731 | t3m_01087 | ITERM:07335    | lysyl-tRNA synthetase, class II (EC 6.1.1.6)                   |          |
| 2572232731 | t3m_01087 | Locus_type     | CDS                                                            |          |
| 2572232731 | t3m_01087 | Product_name   | lysyl-tRNA synthetase, class II (EC 6.1.1.6)                   |          |
| 2572232731 | t3m_01087 | Scaffold       | t3m_contig_70_177_len_28436_read_count_2535366.23              |          |
| 2572232731 | t3m_01087 | Coordinates    | 1464..2942(+)                                                  |          |
| 2572232731 | t3m_01087 | DNA_length     | 1479bp                                                         |          |
| 2572232731 | t3m_01087 | Protein_length | 492aa                                                          |          |
| 2572232731 | t3m_01087 | GC             |                                                                | 0.69     |
| 2572232732 | t3m_01088 | KEGG_module    | M00254: ABC-2 type transport system                            |          |
| 2572232732 | t3m_01088 | COG_category   | [V] Defense mechanisms                                         |          |
| 2572232732 | t3m_01088 | COG1131        | ABC-type multidrug transport system, ATPase component          | 7.00E-61 |
| 2572232732 | t3m_01088 | pfam00005      | ABC_tran                                                       | 1.20E-26 |
| 2572232732 | t3m_01088 | KO:K01990      | ABC-2 type transport system ATP-binding protein                | 0.00E+00 |
| 2572232732 | t3m_01088 | Locus_type     | CDS                                                            |          |
| 2572232732 | t3m_01088 | Product_name   | ABC-type multidrug transport system, ATPase component          |          |
| 2572232732 | t3m_01088 | Scaffold       | t3m_contig_70_177_len_28436_read_count_2535366.23              |          |
| 2572232732 | t3m_01088 | Coordinates    | 2992..3798(+)                                                  |          |
| 2572232732 | t3m_01088 | DNA_length     | 807bp                                                          |          |
| 2572232732 | t3m_01088 | Protein_length | 268aa                                                          |          |
| 2572232732 | t3m_01088 | GC             |                                                                | 0.71     |
| 2572232733 | t3m_01089 | COG_category   | [R] General function prediction only                           |          |
| 2572232733 | t3m_01089 | COG3368        | Predicted permease                                             | 6.00E-06 |
| 2572232733 | t3m_01089 | pfam09847      | DUF2074                                                        | 4.80E-13 |
| 2572232733 | t3m_01089 | Locus_type     | CDS                                                            |          |
| 2572232733 | t3m_01089 | Product_name   | Predicted permease (DUF2074)                                   |          |
| 2572232733 | t3m_01089 | Scaffold       | t3m_contig_70_177_len_28436_read_count_2535366.23              |          |
| 2572232733 | t3m_01089 | Coordinates    | 3795..5459(+)                                                  |          |
| 2572232733 | t3m_01089 | DNA_length     | 1665bp                                                         |          |
| 2572232733 | t3m_01089 | Protein_length | 554aa                                                          |          |
| 2572232733 | t3m_01089 | GC             |                                                                | 0.7      |

|            |           |                |                                                                    |          |
|------------|-----------|----------------|--------------------------------------------------------------------|----------|
| 2572232733 | t3m_01089 | Transmembrane  | Yes                                                                |          |
| 2572232734 | t3m_01090 | KEGG_module    | M00359: Aminoacyl-tRNA biosynthesis, eukaryotes                    |          |
| 2572232734 | t3m_01090 | KEGG_module    | M00360: Aminoacyl-tRNA biosynthesis, prokaryotes                   |          |
| 2572232734 | t3m_01090 | Metacyc        | TRNA-CHARGING-PWY: tRNA charging                                   |          |
| 2572232734 | t3m_01090 | IMG_pathway    | 505: L-valine ligation to tRNA(Val)                                |          |
| 2572232734 | t3m_01090 | COG_category   | [J] Translation, ribosomal structure and biogenesis                |          |
| 2572232734 | t3m_01090 | COG0525        | Valyl-tRNA synthetase                                              | 0.00E+00 |
| 2572232734 | t3m_01090 | pfam00133      | tRNA-synt_1                                                        | 0.00E+00 |
| 2572232734 | t3m_01090 | pfam08264      | Anticodon_1                                                        | 3.70E-34 |
| 2572232734 | t3m_01090 | pfam10458      | Val_tRNA-synt_C                                                    | 5.10E-09 |
| 2572232734 | t3m_01090 | EC:6.1.1.9     | Valine--tRNA ligase.                                               |          |
| 2572232734 | t3m_01090 | TIGR00422      | valyl-tRNA synthetase                                              | 0.00E+00 |
| 2572232734 | t3m_01090 | KO:K01873      | valyl-tRNA synthetase [EC:6.1.1.9]                                 | 0.00E+00 |
| 2572232734 | t3m_01090 | ITERM:00407    | valyl-tRNA synthetase (EC 6.1.1.9)                                 |          |
| 2572232734 | t3m_01090 | Locus_type     | CDS                                                                |          |
| 2572232734 | t3m_01090 | Product_name   | valyl-tRNA synthetase (EC 6.1.1.9)                                 |          |
| 2572232734 | t3m_01090 | Scaffold       | t3m_contig_70_177_len_28436_read_count_2535366.23                  |          |
| 2572232734 | t3m_01090 | Coordinates    | 5627..8143(+)                                                      |          |
| 2572232734 | t3m_01090 | DNA_length     | 2517bp                                                             |          |
| 2572232734 | t3m_01090 | Protein_length | 838aa                                                              |          |
| 2572232734 | t3m_01090 | GC             |                                                                    | 0.71     |
| 2572232735 | t3m_01091 | COG_category   | [C] Energy production and conversion                               |          |
| 2572232735 | t3m_01091 | COG0667        | Predicted oxidoreductases (related to aryl-alcohol dehydrogenases) | 1.00E-54 |
| 2572232735 | t3m_01091 | pfam00248      | Aldo_ket_red                                                       | 4.10E-64 |
| 2572232735 | t3m_01091 | Locus_type     | CDS                                                                |          |
| 2572232735 | t3m_01091 | Product_name   | Predicted oxidoreductases (related to aryl-alcohol dehydrogenases) |          |
| 2572232735 | t3m_01091 | Scaffold       | t3m_contig_70_177_len_28436_read_count_2535366.23                  |          |
| 2572232735 | t3m_01091 | Coordinates    | 8140..9144(+)                                                      |          |
| 2572232735 | t3m_01091 | DNA_length     | 1005bp                                                             |          |
| 2572232735 | t3m_01091 | Protein_length | 334aa                                                              |          |
| 2572232735 | t3m_01091 | GC             |                                                                    | 0.69     |

|            |           |                |                                                                            |          |
|------------|-----------|----------------|----------------------------------------------------------------------------|----------|
| 2572232736 | t3m_01092 | KEGG_module    | M00020: Serine biosynthesis, glycerate-3P => serine                        |          |
| 2572232736 | t3m_01092 | Metacyc        | SERSYN-PWY: serine biosynthesis                                            |          |
| 2572232736 | t3m_01092 | COG_category   | [E] Amino acid transport and metabolism                                    |          |
| 2572232736 | t3m_01092 | COG0560        | Phosphoserine phosphatase                                                  | 8.00E-25 |
| 2572232736 | t3m_01092 | pfam12710      | HAD                                                                        | 3.00E-13 |
| 2572232736 | t3m_01092 | EC:3.1.3.3     | Phosphoserine phosphatase.                                                 |          |
| 2572232736 | t3m_01092 | TIGR01488      | Haloacid Dehalogenase superfamily, subfamily IB, phosphoserine phosphatase | 8.10E-28 |
| 2572232736 | t3m_01092 | TIGR01491      | HAD-superfamily, subfamily-IB PSPase-like hydrolase, archaeal              | 2.60E-47 |
| 2572232736 | t3m_01092 | KO:K01079      | phosphoserine phosphatase [EC:3.1.3.3]                                     | 3.90E-27 |
| 2572232736 | t3m_01092 | Locus_type     | CDS                                                                        |          |
| 2572232736 | t3m_01092 | Product_name   | Haloacid Dehalogenase superfamily, subfamily IB, phosphoserine phosphatase |          |
| 2572232736 | t3m_01092 | Scaffold       | t3m_contig_70_177_len_28436_read_count_2535366.23                          |          |
| 2572232736 | t3m_01092 | Coordinates    | 9137..9796(+)                                                              |          |
| 2572232736 | t3m_01092 | DNA_length     | 660bp                                                                      |          |
| 2572232736 | t3m_01092 | Protein_length | 219aa                                                                      |          |
| 2572232736 | t3m_01092 | GC             |                                                                            | 0.71     |
| 2572232737 | t3m_01093 | COG_category   | [J] Translation, ribosomal structure and biogenesis                        |          |
| 2572232737 | t3m_01093 | COG1601        | Translation initiation factor 2, beta subunit (eIF-2beta)/eIF-5 N-terminal | 3.00E-29 |
| 2572232737 | t3m_01093 | pfam01938      | TRAM                                                                       | 7.60E-07 |
| 2572232737 | t3m_01093 | pfam01873      | eIF-5_eIF-2B                                                               | 3.50E-30 |
| 2572232737 | t3m_01093 | TIGR00311      | translation initiation factor aIF-2, beta subunit, putative                | 2.50E-41 |
| 2572232737 | t3m_01093 | KO:K03238      | translation initiation factor 2 subunit 2                                  | 4.90E-41 |
| 2572232737 | t3m_01093 | ITERM:01956    | translation initiation factor 2 subunit beta (aeIF-2b)                     |          |
| 2572232737 | t3m_01093 | Locus_type     | CDS                                                                        |          |
| 2572232737 | t3m_01093 | Product_name   | translation initiation factor 2 subunit beta (aeIF-2b)                     |          |
| 2572232737 | t3m_01093 | Scaffold       | t3m_contig_70_177_len_28436_read_count_2535366.23                          |          |
| 2572232737 | t3m_01093 | Coordinates    | 9840..10457(+)                                                             |          |
| 2572232737 | t3m_01093 | DNA_length     | 618bp                                                                      |          |
| 2572232737 | t3m_01093 | Protein_length | 205aa                                                                      |          |
| 2572232737 | t3m_01093 | GC             |                                                                            | 0.68     |
| 2572232737 | t3m_01093 | Fused_gene     | Yes                                                                        |          |
| 2572232738 | t3m_01094 | COG_category   | [S] Function unknown                                                       |          |

|            |           |                |                                                                             |          |
|------------|-----------|----------------|-----------------------------------------------------------------------------|----------|
| 2572232738 | t3m_01094 | COG3389        | Uncharacterized protein conserved in archaea                                | 1.00E-36 |
| 2572232738 | t3m_01094 | pfam06550      | DUF1119                                                                     | 8.80E-63 |
| 2572232738 | t3m_01094 | Locus_type     | CDS                                                                         |          |
| 2572232738 | t3m_01094 | Product_name   | Uncharacterized protein conserved in archaea                                |          |
| 2572232738 | t3m_01094 | Scaffold       | t3m_contig_70_177_len_28436_read_count_2535366.23                           |          |
| 2572232738 | t3m_01094 | Coordinates    | 10464..11432(+)                                                             |          |
| 2572232738 | t3m_01094 | DNA_length     | 969bp                                                                       |          |
| 2572232738 | t3m_01094 | Protein_length | 322aa                                                                       |          |
| 2572232738 | t3m_01094 | GC             |                                                                             | 0.69     |
| 2572232738 | t3m_01094 | Transmembrane  | Yes                                                                         |          |
| 2572232739 | t3m_01095 | Metacyc        | PWY-5905: hypusine biosynthesis                                             |          |
| 2572232739 | t3m_01095 | COG_category   | [O] Posttranslational modification, protein turnover, chaperones            |          |
| 2572232739 | t3m_01095 | COG1899        | Deoxyhypusine synthase                                                      | 3.00E-88 |
| 2572232739 | t3m_01095 | pfam01916      | DS                                                                          | 3.90E-77 |
| 2572232739 | t3m_01095 | EC:2.5.1.46    | Deoxyhypusine synthase.                                                     |          |
| 2572232739 | t3m_01095 | TIGR00321      | deoxyhypusine synthase                                                      | 5.00E-83 |
| 2572232739 | t3m_01095 | KO:K00809      | deoxyhypusine synthase [EC:2.5.1.46]                                        | 0.00E+00 |
| 2572232739 | t3m_01095 | Locus_type     | CDS                                                                         |          |
| 2572232739 | t3m_01095 | Product_name   | Deoxyhypusine synthase                                                      |          |
| 2572232739 | t3m_01095 | Scaffold       | t3m_contig_70_177_len_28436_read_count_2535366.23                           |          |
| 2572232739 | t3m_01095 | Coordinates    | 11455..12393(+)                                                             |          |
| 2572232739 | t3m_01095 | DNA_length     | 939bp                                                                       |          |
| 2572232739 | t3m_01095 | Protein_length | 312aa                                                                       |          |
| 2572232739 | t3m_01095 | GC             |                                                                             | 0.69     |
| 2572232740 | t3m_01096 | KEGG_module    | M00116: Menaquinone biosynthesis, chorismate => menaquinone                 |          |
| 2572232740 | t3m_01096 | Metacyc        | PWY-5837: 1,4-dihydroxy-2-naphthoate biosynthesis I                         |          |
| 2572232740 | t3m_01096 | Metacyc        | PWY-5791: 1,4-dihydroxy-2-naphthoate biosynthesis II (plants)               |          |
| 2572232740 | t3m_01096 | COG_category   | [M] Cell wall/membrane/envelope biogenesis                                  |          |
| 2572232740 | t3m_01096 | COG_category   | [R] General function prediction only                                        |          |
| 2572232740 | t3m_01096 | COG4948        | L-alanine-DL-glutamate epimerase and related enzymes of enolase superfamily | 1.00E-47 |
| 2572232740 | t3m_01096 | pfam13378      | MR_MLE_C                                                                    | 2.60E-15 |
| 2572232740 | t3m_01096 | pfam02746      | MR_MLE_N                                                                    | 9.60E-13 |

|            |           |                |                                                   |          |
|------------|-----------|----------------|---------------------------------------------------|----------|
| 2572232740 | t3m_01096 | EC:4.2.1.113   | o-succinylbenzoate synthase.                      |          |
| 2572232740 | t3m_01096 | TIGR01928      | o-succinylbenzoate synthase                       | 2.80E-71 |
| 2572232740 | t3m_01096 | KO:K02549      | O-succinylbenzoate synthase [EC:4.2.1.113]        | 0.00E+00 |
| 2572232740 | t3m_01096 | Locus_type     | CDS                                               |          |
| 2572232740 | t3m_01096 | Product_name   | o-succinylbenzoate synthase                       |          |
| 2572232740 | t3m_01096 | Scaffold       | t3m_contig_70_177_len_28436_read_count_2535366.23 |          |
| 2572232740 | t3m_01096 | Coordinates    | 12415..13530(-)                                   |          |
| 2572232740 | t3m_01096 | DNA_length     | 1116bp                                            |          |
| 2572232740 | t3m_01096 | Protein_length | 371aa                                             |          |
| 2572232740 | t3m_01096 | GC             |                                                   | 0.7      |
| 2572232741 | t3m_01097 | Locus_type     | tRNA                                              |          |
| 2572232741 | t3m_01097 | Product_name   | tRNA_Lys_CTT                                      |          |
| 2572232741 | t3m_01097 | Scaffold       | t3m_contig_70_177_len_28436_read_count_2535366.23 |          |
| 2572232741 | t3m_01097 | Coordinates    | 13647..13720(+)                                   |          |
| 2572232741 | t3m_01097 | DNA_length     | 74bp                                              |          |
| 2572232741 | t3m_01097 | GC             |                                                   | 0.68     |
| 2572232742 | t3m_01098 | Locus_type     | CDS                                               |          |
| 2572232742 | t3m_01098 | Product_name   | hypothetical protein                              |          |
| 2572232742 | t3m_01098 | Scaffold       | t3m_contig_70_177_len_28436_read_count_2535366.23 |          |
| 2572232742 | t3m_01098 | Coordinates    | 13789..14763(+)                                   |          |
| 2572232742 | t3m_01098 | DNA_length     | 975bp                                             |          |
| 2572232742 | t3m_01098 | Protein_length | 324aa                                             |          |
| 2572232742 | t3m_01098 | GC             |                                                   | 0.65     |
| 2572232742 | t3m_01098 | Transmembrane  | Yes                                               |          |
| 2572232743 | t3m_01099 | COG_category   | [S] Function unknown                              |          |
| 2572232743 | t3m_01099 | COG3247        | Uncharacterized conserved protein                 | 4.00E-04 |
| 2572232743 | t3m_01099 | Locus_type     | CDS                                               |          |
| 2572232743 | t3m_01099 | Product_name   | Uncharacterized conserved protein                 |          |
| 2572232743 | t3m_01099 | Scaffold       | t3m_contig_70_177_len_28436_read_count_2535366.23 |          |
| 2572232743 | t3m_01099 | Coordinates    | 14760..15935(-)                                   |          |
| 2572232743 | t3m_01099 | DNA_length     | 1176bp                                            |          |



|            |           |                |                                                                            |  |          |
|------------|-----------|----------------|----------------------------------------------------------------------------|--|----------|
| 2572232743 | t3m_01099 | Protein_length | 391aa                                                                      |  |          |
| 2572232743 | t3m_01099 | GC             |                                                                            |  | 0.66     |
| 2572232743 | t3m_01099 | Transmembrane  | Yes                                                                        |  |          |
| 2572232744 | t3m_01100 | Locus_type     | CDS                                                                        |  |          |
| 2572232744 | t3m_01100 | Product_name   | hypothetical protein                                                       |  |          |
| 2572232744 | t3m_01100 | Scaffold       | t3m_contig_70_177_len_28436_read_count_2535366.23                          |  |          |
| 2572232744 | t3m_01100 | Coordinates    | 15939..16232(-)                                                            |  |          |
| 2572232744 | t3m_01100 | DNA_length     | 294bp                                                                      |  |          |
| 2572232744 | t3m_01100 | Protein_length | 97aa                                                                       |  |          |
| 2572232744 | t3m_01100 | GC             |                                                                            |  | 0.65     |
| 2572232745 | t3m_01101 | COG_category   | [O] Posttranslational modification, protein turnover, chaperones           |  |          |
| 2572232745 | t3m_01101 | COG1765        | Predicted redox protein, regulator of disulfide bond formation             |  | 2.00E-09 |
| 2572232745 | t3m_01101 | pfam02566      | OsmC                                                                       |  | 8.20E-14 |
| 2572232745 | t3m_01101 | KO:K07397      | putative redox protein                                                     |  | 1.60E-18 |
| 2572232745 | t3m_01101 | Locus_type     | CDS                                                                        |  |          |
| 2572232745 | t3m_01101 | Product_name   | Predicted redox protein, regulator of disulfide bond formation             |  |          |
| 2572232745 | t3m_01101 | Scaffold       | t3m_contig_70_177_len_28436_read_count_2535366.23                          |  |          |
| 2572232745 | t3m_01101 | Coordinates    | 16415..16816(+)                                                            |  |          |
| 2572232745 | t3m_01101 | DNA_length     | 402bp                                                                      |  |          |
| 2572232745 | t3m_01101 | Protein_length | 133aa                                                                      |  |          |
| 2572232745 | t3m_01101 | GC             |                                                                            |  | 0.63     |
| 2572232745 | t3m_01101 | Transmembrane  | Yes                                                                        |  |          |
| 2572232746 | t3m_01102 | COG_category   | [Q] Secondary metabolites biosynthesis, transport and catabolism           |  |          |
| 2572232746 | t3m_01102 | COG2761        | Predicted dithiol-disulfide isomerase involved in polyketide biosynthesis: |  | 2.00E-42 |
| 2572232746 | t3m_01102 | pfam01323      | DSBA                                                                       |  | 4.50E-43 |
| 2572232746 | t3m_01102 | Locus_type     | CDS                                                                        |  |          |
| 2572232746 | t3m_01102 | Product_name   | Predicted dithiol-disulfide isomerase involved in polyketide biosynthesis  |  |          |
| 2572232746 | t3m_01102 | Scaffold       | t3m_contig_70_177_len_28436_read_count_2535366.23                          |  |          |
| 2572232746 | t3m_01102 | Coordinates    | 16834..17475(+)                                                            |  |          |
| 2572232746 | t3m_01102 | DNA_length     | 642bp                                                                      |  |          |
| 2572232746 | t3m_01102 | Protein_length | 213aa                                                                      |  |          |

|            |           |                |                                                                    |          |
|------------|-----------|----------------|--------------------------------------------------------------------|----------|
| 2572232746 | t3m_01102 | GC             |                                                                    | 0.66     |
| 2572232747 | t3m_01103 | COG_category   | [C] Energy production and conversion                               |          |
| 2572232747 | t3m_01103 | COG0667        | Predicted oxidoreductases (related to aryl-alcohol dehydrogenases) | 1.00E-69 |
| 2572232747 | t3m_01103 | pfam00248      | Aldo_ket_red                                                       | 7.00E-71 |
| 2572232747 | t3m_01103 | Locus_type     | CDS                                                                |          |
| 2572232747 | t3m_01103 | Product_name   | Predicted oxidoreductases (related to aryl-alcohol dehydrogenases) |          |
| 2572232747 | t3m_01103 | Scaffold       | t3m_contig_70_177_len_28436_read_count_2535366.23                  |          |
| 2572232747 | t3m_01103 | Coordinates    | 17591..18562(+)                                                    |          |
| 2572232747 | t3m_01103 | DNA_length     | 972bp                                                              |          |
| 2572232747 | t3m_01103 | Protein_length | 323aa                                                              |          |
| 2572232747 | t3m_01103 | GC             |                                                                    | 0.67     |
| 2572232748 | t3m_01104 | Locus_type     | CDS                                                                |          |
| 2572232748 | t3m_01104 | Product_name   | hypothetical protein                                               |          |
| 2572232748 | t3m_01104 | Scaffold       | t3m_contig_70_177_len_28436_read_count_2535366.23                  |          |
| 2572232748 | t3m_01104 | Coordinates    | 18613..24231(-)                                                    |          |
| 2572232748 | t3m_01104 | DNA_length     | 5619bp                                                             |          |
| 2572232748 | t3m_01104 | Protein_length | 1872aa                                                             |          |
| 2572232748 | t3m_01104 | GC             |                                                                    | 0.65     |
| 2572232748 | t3m_01104 | Transmembrane  | Yes                                                                |          |
| 2572232749 | t3m_01105 | Locus_type     | CDS                                                                |          |
| 2572232749 | t3m_01105 | Product_name   | hypothetical protein                                               |          |
| 2572232749 | t3m_01105 | Scaffold       | t3m_contig_70_177_len_28436_read_count_2535366.23                  |          |
| 2572232749 | t3m_01105 | Coordinates    | 24994..27759(-)                                                    |          |
| 2572232749 | t3m_01105 | DNA_length     | 2766bp                                                             |          |
| 2572232749 | t3m_01105 | Protein_length | 921aa                                                              |          |
| 2572232749 | t3m_01105 | GC             |                                                                    | 0.64     |
| 2572232749 | t3m_01105 | Transmembrane  | Yes                                                                |          |
| 2572232750 | t3m_01106 | Locus_type     | CDS                                                                |          |
| 2572232750 | t3m_01106 | Product_name   | hypothetical protein                                               |          |
| 2572232750 | t3m_01106 | Scaffold       | t3m_contig_70_177_len_28436_read_count_2535366.23                  |          |

|            |           |                |                                                                                     |          |
|------------|-----------|----------------|-------------------------------------------------------------------------------------|----------|
| 2572232750 | t3m_01106 | Coordinates    | 27959..28087(+)                                                                     |          |
| 2572232750 | t3m_01106 | DNA_length     | 129bp                                                                               |          |
| 2572232750 | t3m_01106 | Protein_length | 42aa                                                                                |          |
| 2572232750 | t3m_01106 | GC             |                                                                                     | 0.58     |
| 2572232751 | t3m_01107 | pfam02515      | CoA_transf_3                                                                        | 1.10E-14 |
| 2572232751 | t3m_01107 | Locus_type     | CDS                                                                                 |          |
| 2572232751 | t3m_01107 | Product_name   | CoA-transferase family III                                                          |          |
| 2572232751 | t3m_01107 | Scaffold       | t3m_contig_70_180_len_28208_read_count_2610123.24                                   |          |
| 2572232751 | t3m_01107 | Coordinates    | 1..690(+)                                                                           |          |
| 2572232751 | t3m_01107 | DNA_length     | 690bp                                                                               |          |
| 2572232751 | t3m_01107 | Protein_length | 229aa                                                                               |          |
| 2572232751 | t3m_01107 | GC             |                                                                                     | 0.68     |
| 2572232752 | t3m_01108 | KEGG_module    | M00540: Benzoate degradation, cyclohexanecarboxylic acid =>pimeloyl-CoA             |          |
| 2572232752 | t3m_01108 | Metacyc        | PWY-6670: citronellol degradation                                                   |          |
| 2572232752 | t3m_01108 | Metacyc        | CARNMET-PWY: carnitine degradation I                                                |          |
| 2572232752 | t3m_01108 | Metacyc        | PWY-6948: sitosterol degradation to androstenedione                                 |          |
| 2572232752 | t3m_01108 | Metacyc        | PWY-6946: cholesterol degradation to androstenedione II (cholesterol dehydrogenase) |          |
| 2572232752 | t3m_01108 | Metacyc        | PWY-6672: <i>cis</i>-genanyl-CoA degradation                                        |          |
| 2572232752 | t3m_01108 | Metacyc        | PWY-6945: cholesterol degradation to androstenedione I (cholesterol oxidase)        |          |
| 2572232752 | t3m_01108 | Metacyc        | PWY-6993: nicotine degradation II                                                   |          |
| 2572232752 | t3m_01108 | Metacyc        | PWY-6944: androstenedione degradation                                               |          |
| 2572232752 | t3m_01108 | Metacyc        | PWY66-201: nicotine degradation IV                                                  |          |
| 2572232752 | t3m_01108 | COG_category   | [I] Lipid transport and metabolism                                                  |          |
| 2572232752 | t3m_01108 | COG1960        | Acyl-CoA dehydrogenases                                                             | 4.00E-56 |
| 2572232752 | t3m_01108 | pfam02770      | Acyl-CoA_dh_M                                                                       | 5.00E-12 |
| 2572232752 | t3m_01108 | pfam02771      | Acyl-CoA_dh_N                                                                       | 8.70E-13 |
| 2572232752 | t3m_01108 | pfam00441      | Acyl-CoA_dh_1                                                                       | 7.90E-34 |
| 2572232752 | t3m_01108 | EC:1.3.99.-    | Oxidoreductases. Acting on the CH-CH group of donors. With other acceptors.         |          |
| 2572232752 | t3m_01108 | KO:K04117      | cyclohexanecarboxyl-CoA dehydrogenase [EC:1.3.99.-]                                 | 0.00E+00 |
| 2572232752 | t3m_01108 | Locus_type     | CDS                                                                                 |          |
| 2572232752 | t3m_01108 | Product_name   | Acyl-CoA dehydrogenases                                                             |          |
| 2572232752 | t3m_01108 | Scaffold       | t3m_contig_70_180_len_28208_read_count_2610123.24                                   |          |

|            |           |                |                                                                 |          |
|------------|-----------|----------------|-----------------------------------------------------------------|----------|
| 2572232752 | t3m_01108 | Coordinates    | 691..1854(+)                                                    |          |
| 2572232752 | t3m_01108 | DNA_length     | 1164bp                                                          |          |
| 2572232752 | t3m_01108 | Protein_length | 387aa                                                           |          |
| 2572232752 | t3m_01108 | GC             |                                                                 | 0.68     |
| 2572232753 | t3m_01109 | COG_category   | [M] Cell wall/membrane/envelope biogenesis                      |          |
| 2572232753 | t3m_01109 | COG1215        | Glycosyltransferases, probably involved in cell wall biogenesis | 1.00E-34 |
| 2572232753 | t3m_01109 | pfam13641      | Glyco_tranf_2_3                                                 | 7.90E-30 |
| 2572232753 | t3m_01109 | Locus_type     | CDS                                                             |          |
| 2572232753 | t3m_01109 | Product_name   | Glycosyltransferases, probably involved in cell wall biogenesis |          |
| 2572232753 | t3m_01109 | Scaffold       | t3m_contig_70_180_len_28208_read_count_2610123.24               |          |
| 2572232753 | t3m_01109 | Coordinates    | 1964..4036(-)                                                   |          |
| 2572232753 | t3m_01109 | DNA_length     | 2073bp                                                          |          |
| 2572232753 | t3m_01109 | Protein_length | 690aa                                                           |          |
| 2572232753 | t3m_01109 | GC             |                                                                 | 0.64     |
| 2572232753 | t3m_01109 | Transmembrane  | Yes                                                             |          |
| 2572232754 | t3m_01110 | Locus_type     | CDS                                                             |          |
| 2572232754 | t3m_01110 | Product_name   | hypothetical protein                                            |          |
| 2572232754 | t3m_01110 | Scaffold       | t3m_contig_70_180_len_28208_read_count_2610123.24               |          |
| 2572232754 | t3m_01110 | Coordinates    | 4105..5247(-)                                                   |          |
| 2572232754 | t3m_01110 | DNA_length     | 1143bp                                                          |          |
| 2572232754 | t3m_01110 | Protein_length | 380aa                                                           |          |
| 2572232754 | t3m_01110 | GC             |                                                                 | 0.62     |
| 2572232754 | t3m_01110 | Transmembrane  | Yes                                                             |          |
| 2572232755 | t3m_01111 | Locus_type     | CDS                                                             |          |
| 2572232755 | t3m_01111 | Product_name   | hypothetical protein                                            |          |
| 2572232755 | t3m_01111 | Scaffold       | t3m_contig_70_180_len_28208_read_count_2610123.24               |          |
| 2572232755 | t3m_01111 | Coordinates    | 7734..11042(-)                                                  |          |
| 2572232755 | t3m_01111 | DNA_length     | 3309bp                                                          |          |
| 2572232755 | t3m_01111 | Protein_length | 1102aa                                                          |          |
| 2572232755 | t3m_01111 | GC             |                                                                 | 0.62     |
| 2572232755 | t3m_01111 | Transmembrane  | Yes                                                             |          |

|            |           |                |                                                   |          |
|------------|-----------|----------------|---------------------------------------------------|----------|
| 2572232756 | t3m_01112 | COG_category   | [R] General function prediction only              |          |
| 2572232756 | t3m_01112 | COG3291        | FOG: PKD repeat                                   | 3.00E-06 |
| 2572232756 | t3m_01112 | pfam00801      | PKD                                               | 5.70E-07 |
| 2572232756 | t3m_01112 | pfam00801      | PKD                                               | 7.70E-06 |
| 2572232756 | t3m_01112 | pfam00801      | PKD                                               | 1.70E-06 |
| 2572232756 | t3m_01112 | Locus_type     | CDS                                               |          |
| 2572232756 | t3m_01112 | Product_name   | FOG: PKD repeat                                   |          |
| 2572232756 | t3m_01112 | Scaffold       | t3m_contig_70_180_len_28208_read_count_2610123.24 |          |
| 2572232756 | t3m_01112 | Coordinates    | 11265..13760(+)                                   |          |
| 2572232756 | t3m_01112 | DNA_length     | 2496bp                                            |          |
| 2572232756 | t3m_01112 | Protein_length | 831aa                                             |          |
| 2572232756 | t3m_01112 | GC             |                                                   | 0.64     |
| 2572232756 | t3m_01112 | Transmembrane  | Yes                                               |          |
| 2572232757 | t3m_01113 | COG_category   | [S] Function unknown                              |          |
| 2572232757 | t3m_01113 | COG1520        | FOG: WD40-like repeat                             | 6.00E-15 |
| 2572232757 | t3m_01113 | pfam13360      | PQQ_2                                             | 1.50E-16 |
| 2572232757 | t3m_01113 | pfam13360      | PQQ_2                                             | 1.10E-09 |
| 2572232757 | t3m_01113 | pfam13360      | PQQ_2                                             | 1.40E-15 |
| 2572232757 | t3m_01113 | pfam13360      | PQQ_2                                             | 3.40E-09 |
| 2572232757 | t3m_01113 | Locus_type     | CDS                                               |          |
| 2572232757 | t3m_01113 | Product_name   | FOG: WD40-like repeat                             |          |
| 2572232757 | t3m_01113 | Scaffold       | t3m_contig_70_180_len_28208_read_count_2610123.24 |          |
| 2572232757 | t3m_01113 | Coordinates    | 13851..16931(+)                                   |          |
| 2572232757 | t3m_01113 | DNA_length     | 3081bp                                            |          |
| 2572232757 | t3m_01113 | Protein_length | 1026aa                                            |          |
| 2572232757 | t3m_01113 | GC             |                                                   | 0.65     |
| 2572232757 | t3m_01113 | Signal_peptide | Yes                                               |          |
| 2572232758 | t3m_01114 | Locus_type     | CDS                                               |          |
| 2572232758 | t3m_01114 | Product_name   | hypothetical protein                              |          |
| 2572232758 | t3m_01114 | Scaffold       | t3m_contig_70_180_len_28208_read_count_2610123.24 |          |
| 2572232758 | t3m_01114 | Coordinates    | 17133..18566(+)                                   |          |

|            |           |                |             |                                                   |          |
|------------|-----------|----------------|-------------|---------------------------------------------------|----------|
| 2572232758 | t3m_01114 | DNA_length     |             | 1434bp                                            |          |
| 2572232758 | t3m_01114 | Protein_length |             | 477aa                                             |          |
| 2572232758 | t3m_01114 | GC             |             |                                                   | 0.64     |
| 2572232758 | t3m_01114 | Transmembrane  |             | Yes                                               |          |
| 2572232759 | t3m_01115 | Locus_type     |             | CDS                                               |          |
| 2572232759 | t3m_01115 | Product_name   |             | hypothetical protein                              |          |
| 2572232759 | t3m_01115 | Scaffold       |             | t3m_contig_70_180_len_28208_read_count_2610123.24 |          |
| 2572232759 | t3m_01115 | Coordinates    |             | 18809..20005(+)                                   |          |
| 2572232759 | t3m_01115 | DNA_length     |             | 1197bp                                            |          |
| 2572232759 | t3m_01115 | Protein_length |             | 398aa                                             |          |
| 2572232759 | t3m_01115 | GC             |             |                                                   | 0.66     |
| 2572232759 | t3m_01115 | Transmembrane  |             | Yes                                               |          |
| 2572232760 | t3m_01116 | pfam01814      | Hemerythrin |                                                   | 1.00E-05 |
| 2572232760 | t3m_01116 | Locus_type     |             | CDS                                               |          |
| 2572232760 | t3m_01116 | Product_name   |             | Hemerythrin HHE cation binding domain             |          |
| 2572232760 | t3m_01116 | Scaffold       |             | t3m_contig_70_180_len_28208_read_count_2610123.24 |          |
| 2572232760 | t3m_01116 | Coordinates    |             | 20393..20932(+)                                   |          |
| 2572232760 | t3m_01116 | DNA_length     |             | 540bp                                             |          |
| 2572232760 | t3m_01116 | Protein_length |             | 179aa                                             |          |
| 2572232760 | t3m_01116 | GC             |             |                                                   | 0.66     |
| 2572232761 | t3m_01117 | Locus_type     |             | CDS                                               |          |
| 2572232761 | t3m_01117 | Product_name   |             | hypothetical protein                              |          |
| 2572232761 | t3m_01117 | Scaffold       |             | t3m_contig_70_180_len_28208_read_count_2610123.24 |          |
| 2572232761 | t3m_01117 | Coordinates    |             | 21039..21314(+)                                   |          |
| 2572232761 | t3m_01117 | DNA_length     |             | 276bp                                             |          |
| 2572232761 | t3m_01117 | Protein_length |             | 91aa                                              |          |
| 2572232761 | t3m_01117 | GC             |             |                                                   | 0.67     |
| 2572232762 | t3m_01118 | Locus_type     |             | CDS                                               |          |
| 2572232762 | t3m_01118 | Product_name   |             | hypothetical protein                              |          |
| 2572232762 | t3m_01118 | Scaffold       |             | t3m_contig_70_180_len_28208_read_count_2610123.24 |          |

|            |           |                |                                                                                                 |          |
|------------|-----------|----------------|-------------------------------------------------------------------------------------------------|----------|
| 2572232762 | t3m_01118 | Coordinates    | 21446..21985(-)                                                                                 |          |
| 2572232762 | t3m_01118 | DNA_length     | 540bp                                                                                           |          |
| 2572232762 | t3m_01118 | Protein_length | 179aa                                                                                           |          |
| 2572232762 | t3m_01118 | GC             |                                                                                                 | 0.64     |
| 2572232762 | t3m_01118 | Transmembrane  | Yes                                                                                             |          |
| 2572232763 | t3m_01119 | KEGG_module    | M00153: Cytochrome d ubiquinol oxidase                                                          |          |
| 2572232763 | t3m_01119 | Metacyc        | PWY-6498: eumelanin biosynthesis                                                                |          |
| 2572232763 | t3m_01119 | Metacyc        | PWY-6824: justicidin B biosynthesis                                                             |          |
| 2572232763 | t3m_01119 | Metacyc        | PWY0-1353: succinate to cytochrome <i>bd</i> oxidase electron transfer                          |          |
| 2572232763 | t3m_01119 | Metacyc        | PWY0-1334: NADH to cytochrome <i>bd</i> oxidase electron transfer                               |          |
| 2572232763 | t3m_01119 | Metacyc        | PWY-5476: cornusiin E biosynthesis                                                              |          |
| 2572232763 | t3m_01119 | Metacyc        | PWY-5466: matairesinol biosynthesis                                                             |          |
| 2572232763 | t3m_01119 | Metacyc        | PWY-5787: oligomeric urushiol biosynthesis                                                      |          |
| 2572232763 | t3m_01119 | Metacyc        | PWY-5404: betaxanthin biosynthesis (via dopaxanthin)                                            |          |
| 2572232763 | t3m_01119 | Metacyc        | PWY-5439: betacyanin biosynthesis (via dopamine)                                                |          |
| 2572232763 | t3m_01119 | COG_category   | [C] Energy production and conversion                                                            |          |
| 2572232763 | t3m_01119 | COG1271        | Cytochrome <i>bd</i> -type quinol oxidase, subunit 1                                            | 2.00E-88 |
| 2572232763 | t3m_01119 | pfam01654      | Bac_Ubq_Cox                                                                                     | 5.50E-83 |
| 2572232763 | t3m_01119 | EC:1.10.3.-    | Oxidoreductases. Acting on diphenols and related substances as donors. With oxygen as acceptor. |          |
| 2572232763 | t3m_01119 | KO:K00425      | cytochrome d ubiquinol oxidase subunit I [EC:1.10.3.-]                                          | 0.00E+00 |
| 2572232763 | t3m_01119 | ITERM:06137    | cytochrome <i>bd</i> -I ubiquinol oxidase subunit 1 apoprotein (EC 1.10.3.10)                   |          |
| 2572232763 | t3m_01119 | Locus_type     | CDS                                                                                             |          |
| 2572232763 | t3m_01119 | Product_name   | cytochrome <i>bd</i> -I ubiquinol oxidase subunit 1 apoprotein (EC 1.10.3.10)                   |          |
| 2572232763 | t3m_01119 | Scaffold       | t3m_contig_70_180_len_28208_read_count_2610123.24                                               |          |
| 2572232763 | t3m_01119 | Coordinates    | 22247..23602(+)                                                                                 |          |
| 2572232763 | t3m_01119 | DNA_length     | 1356bp                                                                                          |          |
| 2572232763 | t3m_01119 | Protein_length | 451aa                                                                                           |          |
| 2572232763 | t3m_01119 | GC             |                                                                                                 | 0.63     |
| 2572232763 | t3m_01119 | Transmembrane  | Yes                                                                                             |          |
| 2572232764 | t3m_01120 | KEGG_module    | M00153: Cytochrome d ubiquinol oxidase                                                          |          |
| 2572232764 | t3m_01120 | Metacyc        | PWY-5439: betacyanin biosynthesis (via dopamine)                                                |          |
| 2572232764 | t3m_01120 | Metacyc        | PWY-6824: justicidin B biosynthesis                                                             |          |

|            |           |                |                                                                                                 |          |
|------------|-----------|----------------|-------------------------------------------------------------------------------------------------|----------|
| 2572232764 | t3m_01120 | Metacyc        | PWY-5466: matairesinol biosynthesis                                                             |          |
| 2572232764 | t3m_01120 | Metacyc        | PWY0-1353: succinate to cytochrome <i>bd</i> oxidase electron transfer                          |          |
| 2572232764 | t3m_01120 | Metacyc        | PWY-6498: eumelanin biosynthesis                                                                |          |
| 2572232764 | t3m_01120 | Metacyc        | PWY-5787: oligomeric urushiol biosynthesis                                                      |          |
| 2572232764 | t3m_01120 | Metacyc        | PWY-5404: betaxanthin biosynthesis (via dopaxanthin)                                            |          |
| 2572232764 | t3m_01120 | Metacyc        | PWY0-1334: NADH to cytochrome <i>bd</i> oxidase electron transfer                               |          |
| 2572232764 | t3m_01120 | Metacyc        | PWY-5476: cornusiin E biosynthesis                                                              |          |
| 2572232764 | t3m_01120 | EC:1.10.3.-    | Oxidoreductases. Acting on diphenols and related substances as donors. With oxygen as acceptor. |          |
| 2572232764 | t3m_01120 | KO:K00426      | cytochrome d ubiquinol oxidase subunit II [EC:1.10.3.-]                                         | 0.00E+00 |
| 2572232764 | t3m_01120 | Locus_type     | CDS                                                                                             |          |
| 2572232764 | t3m_01120 | Product_name   | hypothetical protein                                                                            |          |
| 2572232764 | t3m_01120 | Scaffold       | t3m_contig_70_180_len_28208_read_count_2610123.24                                               |          |
| 2572232764 | t3m_01120 | Coordinates    | 23589..24581(+)                                                                                 |          |
| 2572232764 | t3m_01120 | DNA_length     | 993bp                                                                                           |          |
| 2572232764 | t3m_01120 | Protein_length | 330aa                                                                                           |          |
| 2572232764 | t3m_01120 | GC             |                                                                                                 | 0.64     |
| 2572232764 | t3m_01120 | Transmembrane  | Yes                                                                                             |          |
| 2572232765 | t3m_01121 | Locus_type     | CDS                                                                                             |          |
| 2572232765 | t3m_01121 | Product_name   | hypothetical protein                                                                            |          |
| 2572232765 | t3m_01121 | Scaffold       | t3m_contig_70_180_len_28208_read_count_2610123.24                                               |          |
| 2572232765 | t3m_01121 | Coordinates    | 24670..25347(-)                                                                                 |          |
| 2572232765 | t3m_01121 | DNA_length     | 678bp                                                                                           |          |
| 2572232765 | t3m_01121 | Protein_length | 225aa                                                                                           |          |
| 2572232765 | t3m_01121 | GC             |                                                                                                 | 0.66     |
| 2572232765 | t3m_01121 | Transmembrane  | Yes                                                                                             |          |
| 2572232766 | t3m_01122 | pfam13191      | AAA_16                                                                                          | 7.40E-12 |
| 2572232766 | t3m_01122 | Locus_type     | CDS                                                                                             |          |
| 2572232766 | t3m_01122 | Product_name   | AAA ATPase domain                                                                               |          |
| 2572232766 | t3m_01122 | Scaffold       | t3m_contig_70_180_len_28208_read_count_2610123.24                                               |          |
| 2572232766 | t3m_01122 | Coordinates    | 25737..28157(+)                                                                                 |          |
| 2572232766 | t3m_01122 | DNA_length     | 2421bp                                                                                          |          |
| 2572232766 | t3m_01122 | Protein_length | 806aa                                                                                           |          |



|            |           |                |                                                   |      |
|------------|-----------|----------------|---------------------------------------------------|------|
| 2572232766 | t3m_01122 | GC             |                                                   | 0.66 |
| 2572232767 | t3m_01123 | Locus_type     | tRNA                                              |      |
| 2572232767 | t3m_01123 | Product_name   | tRNA_Ile_GAT                                      |      |
| 2572232767 | t3m_01123 | Scaffold       | t3m_contig_70_180_len_28208_read_count_2610123.24 |      |
| 2572232767 | t3m_01123 | Coordinates    | 28148..28207(-)                                   |      |
| 2572232767 | t3m_01123 | DNA_length     | 60bp                                              |      |
| 2572232767 | t3m_01123 | GC             |                                                   | 0.57 |
| 2572232768 | t3m_01124 | Locus_type     | CDS                                               |      |
| 2572232768 | t3m_01124 | Product_name   | hypothetical protein                              |      |
| 2572232768 | t3m_01124 | Scaffold       | t3m_contig_70_195_len_26934_read_count_2495649.25 |      |
| 2572232768 | t3m_01124 | Coordinates    | 40..261(+)                                        |      |
| 2572232768 | t3m_01124 | DNA_length     | 222bp                                             |      |
| 2572232768 | t3m_01124 | Protein_length | 73aa                                              |      |
| 2572232768 | t3m_01124 | GC             |                                                   | 0.66 |
| 2572232769 | t3m_01125 | Locus_type     | CDS                                               |      |
| 2572232769 | t3m_01125 | Product_name   | hypothetical protein                              |      |
| 2572232769 | t3m_01125 | Scaffold       | t3m_contig_70_195_len_26934_read_count_2495649.25 |      |
| 2572232769 | t3m_01125 | Coordinates    | 262..546(+)                                       |      |
| 2572232769 | t3m_01125 | DNA_length     | 285bp                                             |      |
| 2572232769 | t3m_01125 | Protein_length | 94aa                                              |      |
| 2572232769 | t3m_01125 | GC             |                                                   | 0.67 |
| 2572232770 | t3m_01126 | Locus_type     | CDS                                               |      |
| 2572232770 | t3m_01126 | Product_name   | hypothetical protein                              |      |
| 2572232770 | t3m_01126 | Scaffold       | t3m_contig_70_195_len_26934_read_count_2495649.25 |      |
| 2572232770 | t3m_01126 | Coordinates    | 547..822(+)                                       |      |
| 2572232770 | t3m_01126 | DNA_length     | 276bp                                             |      |
| 2572232770 | t3m_01126 | Protein_length | 91aa                                              |      |
| 2572232770 | t3m_01126 | GC             |                                                   | 0.59 |
| 2572232771 | t3m_01127 | Locus_type     | CDS                                               |      |

|            |           |                |                                                                              |                                                                               |          |
|------------|-----------|----------------|------------------------------------------------------------------------------|-------------------------------------------------------------------------------|----------|
| 2572232771 | t3m_01127 | Product_name   |                                                                              | hypothetical protein                                                          |          |
| 2572232771 | t3m_01127 | Scaffold       |                                                                              | t3m_contig_70_195_len_26934_read_count_2495649.25                             |          |
| 2572232771 | t3m_01127 | Coordinates    |                                                                              | 823..996(+)                                                                   |          |
| 2572232771 | t3m_01127 | DNA_length     |                                                                              | 174bp                                                                         |          |
| 2572232771 | t3m_01127 | Protein_length |                                                                              | 57aa                                                                          |          |
| 2572232771 | t3m_01127 | GC             |                                                                              |                                                                               | 0.6      |
|            |           |                |                                                                              |                                                                               |          |
| 2572232772 | t3m_01128 | pfam02796      | HTH_7                                                                        |                                                                               | 1.20E-05 |
| 2572232772 | t3m_01128 | Locus_type     |                                                                              | CDS                                                                           |          |
| 2572232772 | t3m_01128 | Product_name   |                                                                              | Helix-turn-helix domain of resolvase                                          |          |
| 2572232772 | t3m_01128 | Scaffold       |                                                                              | t3m_contig_70_195_len_26934_read_count_2495649.25                             |          |
| 2572232772 | t3m_01128 | Coordinates    |                                                                              | 1483..1881(+)                                                                 |          |
| 2572232772 | t3m_01128 | DNA_length     |                                                                              | 399bp                                                                         |          |
| 2572232772 | t3m_01128 | Protein_length |                                                                              | 132aa                                                                         |          |
| 2572232772 | t3m_01128 | GC             |                                                                              |                                                                               | 0.64     |
|            |           |                |                                                                              |                                                                               |          |
| 2572232773 | t3m_01129 | COG_category   | [K] Transcription                                                            |                                                                               |          |
| 2572232773 | t3m_01129 | COG1405        | Transcription initiation factor TFIIIB, Brf1 subunit/Transcription initiatio |                                                                               | 2.00E-19 |
| 2572232773 | t3m_01129 | Locus_type     |                                                                              | CDS                                                                           |          |
| 2572232773 | t3m_01129 | Product_name   |                                                                              | Transcription initiation factor TFIIIB, Brf1 subunit/Transcription initiation |          |
| 2572232773 | t3m_01129 | Scaffold       |                                                                              | t3m_contig_70_195_len_26934_read_count_2495649.25                             |          |
| 2572232773 | t3m_01129 | Coordinates    |                                                                              | 1857..2786(+)                                                                 |          |
| 2572232773 | t3m_01129 | DNA_length     |                                                                              | 930bp                                                                         |          |
| 2572232773 | t3m_01129 | Protein_length |                                                                              | 309aa                                                                         |          |
| 2572232773 | t3m_01129 | GC             |                                                                              |                                                                               | 0.66     |
|            |           |                |                                                                              |                                                                               |          |
| 2572232774 | t3m_01130 | Locus_type     |                                                                              | CDS                                                                           |          |
| 2572232774 | t3m_01130 | Product_name   |                                                                              | hypothetical protein                                                          |          |
| 2572232774 | t3m_01130 | Scaffold       |                                                                              | t3m_contig_70_195_len_26934_read_count_2495649.25                             |          |
| 2572232774 | t3m_01130 | Coordinates    |                                                                              | 2783..3379(+)                                                                 |          |
| 2572232774 | t3m_01130 | DNA_length     |                                                                              | 597bp                                                                         |          |
| 2572232774 | t3m_01130 | Protein_length |                                                                              | 198aa                                                                         |          |
| 2572232774 | t3m_01130 | GC             |                                                                              |                                                                               | 0.64     |

|            |           |                |                                                   |          |
|------------|-----------|----------------|---------------------------------------------------|----------|
| 2572232775 | t3m_01131 | COG_category   | [L] Replication, recombination and repair         |          |
| 2572232775 | t3m_01131 | COG4974        | Site-specific recombinase XerD                    | 3.00E-29 |
| 2572232775 | t3m_01131 | pfam00589      | Phage_integrase                                   | 1.90E-26 |
| 2572232775 | t3m_01131 | KO:K04763      | integrase/recombinase XerD                        | 7.60E-26 |
| 2572232775 | t3m_01131 | Locus_type     | CDS                                               |          |
| 2572232775 | t3m_01131 | Product_name   | Site-specific recombinase XerD                    |          |
| 2572232775 | t3m_01131 | Scaffold       | t3m_contig_70_195_len_26934_read_count_2495649.25 |          |
| 2572232775 | t3m_01131 | Coordinates    | 3610..4662(-)                                     |          |
| 2572232775 | t3m_01131 | DNA_length     | 1053bp                                            |          |
| 2572232775 | t3m_01131 | Protein_length | 350aa                                             |          |
| 2572232775 | t3m_01131 | GC             |                                                   | 0.65     |
|            |           |                |                                                   |          |
| 2572232776 | t3m_01132 | Locus_type     | CDS                                               |          |
| 2572232776 | t3m_01132 | Product_name   | hypothetical protein                              |          |
| 2572232776 | t3m_01132 | Scaffold       | t3m_contig_70_195_len_26934_read_count_2495649.25 |          |
| 2572232776 | t3m_01132 | Coordinates    | 4843..5232(-)                                     |          |
| 2572232776 | t3m_01132 | DNA_length     | 390bp                                             |          |
| 2572232776 | t3m_01132 | Protein_length | 129aa                                             |          |
| 2572232776 | t3m_01132 | GC             |                                                   | 0.64     |
|            |           |                |                                                   |          |
| 2572232777 | t3m_01133 | Locus_type     | CDS                                               |          |
| 2572232777 | t3m_01133 | Product_name   | hypothetical protein                              |          |
| 2572232777 | t3m_01133 | Scaffold       | t3m_contig_70_195_len_26934_read_count_2495649.25 |          |
| 2572232777 | t3m_01133 | Coordinates    | 5329..6225(+)                                     |          |
| 2572232777 | t3m_01133 | DNA_length     | 897bp                                             |          |
| 2572232777 | t3m_01133 | Protein_length | 298aa                                             |          |
| 2572232777 | t3m_01133 | GC             |                                                   | 0.67     |
|            |           |                |                                                   |          |
| 2572232778 | t3m_01134 | Locus_type     | CDS                                               |          |
| 2572232778 | t3m_01134 | Product_name   | hypothetical protein                              |          |
| 2572232778 | t3m_01134 | Scaffold       | t3m_contig_70_195_len_26934_read_count_2495649.25 |          |
| 2572232778 | t3m_01134 | Coordinates    | 6235..6828(+)                                     |          |
| 2572232778 | t3m_01134 | DNA_length     | 594bp                                             |          |
| 2572232778 | t3m_01134 | Protein_length | 197aa                                             |          |

|            |           |                |                                                   |      |
|------------|-----------|----------------|---------------------------------------------------|------|
| 2572232778 | t3m_01134 | GC             |                                                   | 0.63 |
| 2572232779 | t3m_01135 | Locus_type     | CDS                                               |      |
| 2572232779 | t3m_01135 | Product_name   | hypothetical protein                              |      |
| 2572232779 | t3m_01135 | Scaffold       | t3m_contig_70_195_len_26934_read_count_2495649.25 |      |
| 2572232779 | t3m_01135 | Coordinates    | 6829..7866(+)                                     |      |
| 2572232779 | t3m_01135 | DNA_length     | 1038bp                                            |      |
| 2572232779 | t3m_01135 | Protein_length | 345aa                                             |      |
| 2572232779 | t3m_01135 | GC             |                                                   | 0.62 |
| 2572232779 | t3m_01135 | Signal_peptide | Yes                                               |      |
| 2572232779 | t3m_01135 | Transmembrane  | Yes                                               |      |
| 2572232780 | t3m_01136 | Locus_type     | CDS                                               |      |
| 2572232780 | t3m_01136 | Product_name   | hypothetical protein                              |      |
| 2572232780 | t3m_01136 | Scaffold       | t3m_contig_70_195_len_26934_read_count_2495649.25 |      |
| 2572232780 | t3m_01136 | Coordinates    | 7869..8990(+)                                     |      |
| 2572232780 | t3m_01136 | DNA_length     | 1122bp                                            |      |
| 2572232780 | t3m_01136 | Protein_length | 373aa                                             |      |
| 2572232780 | t3m_01136 | GC             |                                                   | 0.63 |
| 2572232780 | t3m_01136 | Transmembrane  | Yes                                               |      |
| 2572232781 | t3m_01137 | Locus_type     | CDS                                               |      |
| 2572232781 | t3m_01137 | Product_name   | hypothetical protein                              |      |
| 2572232781 | t3m_01137 | Scaffold       | t3m_contig_70_195_len_26934_read_count_2495649.25 |      |
| 2572232781 | t3m_01137 | Coordinates    | 8999..9697(+)                                     |      |
| 2572232781 | t3m_01137 | DNA_length     | 699bp                                             |      |
| 2572232781 | t3m_01137 | Protein_length | 232aa                                             |      |
| 2572232781 | t3m_01137 | GC             |                                                   | 0.65 |
| 2572232782 | t3m_01138 | Locus_type     | CDS                                               |      |
| 2572232782 | t3m_01138 | Product_name   | hypothetical protein                              |      |
| 2572232782 | t3m_01138 | Scaffold       | t3m_contig_70_195_len_26934_read_count_2495649.25 |      |
| 2572232782 | t3m_01138 | Coordinates    | 9701..11299(+)                                    |      |
| 2572232782 | t3m_01138 | DNA_length     | 1599bp                                            |      |

|            |           |                |                                                   |      |
|------------|-----------|----------------|---------------------------------------------------|------|
| 2572232782 | t3m_01138 | Protein_length | 532aa                                             |      |
| 2572232782 | t3m_01138 | GC             |                                                   | 0.63 |
| 2572232783 | t3m_01139 | Locus_type     | CDS                                               |      |
| 2572232783 | t3m_01139 | Product_name   | hypothetical protein                              |      |
| 2572232783 | t3m_01139 | Scaffold       | t3m_contig_70_195_len_26934_read_count_2495649.25 |      |
| 2572232783 | t3m_01139 | Coordinates    | 11374..11670(+)                                   |      |
| 2572232783 | t3m_01139 | DNA_length     | 297bp                                             |      |
| 2572232783 | t3m_01139 | Protein_length | 98aa                                              |      |
| 2572232783 | t3m_01139 | GC             |                                                   | 0.62 |
| 2572232784 | t3m_01140 | Locus_type     | CDS                                               |      |
| 2572232784 | t3m_01140 | Product_name   | hypothetical protein                              |      |
| 2572232784 | t3m_01140 | Scaffold       | t3m_contig_70_195_len_26934_read_count_2495649.25 |      |
| 2572232784 | t3m_01140 | Coordinates    | 11671..12312(+)                                   |      |
| 2572232784 | t3m_01140 | DNA_length     | 642bp                                             |      |
| 2572232784 | t3m_01140 | Protein_length | 213aa                                             |      |
| 2572232784 | t3m_01140 | GC             |                                                   | 0.68 |
| 2572232785 | t3m_01141 | Locus_type     | CDS                                               |      |
| 2572232785 | t3m_01141 | Product_name   | hypothetical protein                              |      |
| 2572232785 | t3m_01141 | Scaffold       | t3m_contig_70_195_len_26934_read_count_2495649.25 |      |
| 2572232785 | t3m_01141 | Coordinates    | 12492..12719(+)                                   |      |
| 2572232785 | t3m_01141 | DNA_length     | 228bp                                             |      |
| 2572232785 | t3m_01141 | Protein_length | 75aa                                              |      |
| 2572232785 | t3m_01141 | GC             |                                                   | 0.68 |
| 2572232786 | t3m_01142 | Locus_type     | CDS                                               |      |
| 2572232786 | t3m_01142 | Product_name   | hypothetical protein                              |      |
| 2572232786 | t3m_01142 | Scaffold       | t3m_contig_70_195_len_26934_read_count_2495649.25 |      |
| 2572232786 | t3m_01142 | Coordinates    | 12716..12916(+)                                   |      |
| 2572232786 | t3m_01142 | DNA_length     | 201bp                                             |      |
| 2572232786 | t3m_01142 | Protein_length | 66aa                                              |      |
| 2572232786 | t3m_01142 | GC             |                                                   | 0.65 |

|            |           |                |                                                   |      |
|------------|-----------|----------------|---------------------------------------------------|------|
| 2572232787 | t3m_01143 | Locus_type     | CDS                                               |      |
| 2572232787 | t3m_01143 | Product_name   | hypothetical protein                              |      |
| 2572232787 | t3m_01143 | Scaffold       | t3m_contig_70_195_len_26934_read_count_2495649.25 |      |
| 2572232787 | t3m_01143 | Coordinates    | 12997..13146(+)                                   |      |
| 2572232787 | t3m_01143 | DNA_length     | 150bp                                             |      |
| 2572232787 | t3m_01143 | Protein_length | 49aa                                              |      |
| 2572232787 | t3m_01143 | GC             |                                                   | 0.63 |
|            |           |                |                                                   |      |
| 2572232788 | t3m_01144 | Locus_type     | CDS                                               |      |
| 2572232788 | t3m_01144 | Product_name   | hypothetical protein                              |      |
| 2572232788 | t3m_01144 | Scaffold       | t3m_contig_70_195_len_26934_read_count_2495649.25 |      |
| 2572232788 | t3m_01144 | Coordinates    | 13143..13361(+)                                   |      |
| 2572232788 | t3m_01144 | DNA_length     | 219bp                                             |      |
| 2572232788 | t3m_01144 | Protein_length | 72aa                                              |      |
| 2572232788 | t3m_01144 | GC             |                                                   | 0.61 |
| 2572232788 | t3m_01144 | Transmembrane  | Yes                                               |      |
|            |           |                |                                                   |      |
| 2572232789 | t3m_01145 | Locus_type     | CDS                                               |      |
| 2572232789 | t3m_01145 | Product_name   | hypothetical protein                              |      |
| 2572232789 | t3m_01145 | Scaffold       | t3m_contig_70_195_len_26934_read_count_2495649.25 |      |
| 2572232789 | t3m_01145 | Coordinates    | 13358..14008(+)                                   |      |
| 2572232789 | t3m_01145 | DNA_length     | 651bp                                             |      |
| 2572232789 | t3m_01145 | Protein_length | 216aa                                             |      |
| 2572232789 | t3m_01145 | GC             |                                                   | 0.65 |
| 2572232789 | t3m_01145 | Transmembrane  | Yes                                               |      |
|            |           |                |                                                   |      |
| 2572232790 | t3m_01146 | Locus_type     | CDS                                               |      |
| 2572232790 | t3m_01146 | Product_name   | hypothetical protein                              |      |
| 2572232790 | t3m_01146 | Scaffold       | t3m_contig_70_195_len_26934_read_count_2495649.25 |      |
| 2572232790 | t3m_01146 | Coordinates    | 14030..14512(+)                                   |      |
| 2572232790 | t3m_01146 | DNA_length     | 483bp                                             |      |
| 2572232790 | t3m_01146 | Protein_length | 160aa                                             |      |
| 2572232790 | t3m_01146 | GC             |                                                   | 0.67 |

|            |           |                |                                                   |      |
|------------|-----------|----------------|---------------------------------------------------|------|
| 2572232790 | t3m_01146 | Transmembrane  | Yes                                               |      |
| 2572232791 | t3m_01147 | Locus_type     | CDS                                               |      |
| 2572232791 | t3m_01147 | Product_name   | hypothetical protein                              |      |
| 2572232791 | t3m_01147 | Scaffold       | t3m_contig_70_195_len_26934_read_count_2495649.25 |      |
| 2572232791 | t3m_01147 | Coordinates    | 14618..14893(+)                                   |      |
| 2572232791 | t3m_01147 | DNA_length     | 276bp                                             |      |
| 2572232791 | t3m_01147 | Protein_length | 91aa                                              |      |
| 2572232791 | t3m_01147 | GC             |                                                   | 0.68 |
| 2572232792 | t3m_01148 | Locus_type     | CDS                                               |      |
| 2572232792 | t3m_01148 | Product_name   | hypothetical protein                              |      |
| 2572232792 | t3m_01148 | Scaffold       | t3m_contig_70_195_len_26934_read_count_2495649.25 |      |
| 2572232792 | t3m_01148 | Coordinates    | 15164..16021(+)                                   |      |
| 2572232792 | t3m_01148 | DNA_length     | 858bp                                             |      |
| 2572232792 | t3m_01148 | Protein_length | 285aa                                             |      |
| 2572232792 | t3m_01148 | GC             |                                                   | 0.64 |
| 2572232792 | t3m_01148 | Transmembrane  | Yes                                               |      |
| 2572232793 | t3m_01149 | Locus_type     | CDS                                               |      |
| 2572232793 | t3m_01149 | Product_name   | hypothetical protein                              |      |
| 2572232793 | t3m_01149 | Scaffold       | t3m_contig_70_195_len_26934_read_count_2495649.25 |      |
| 2572232793 | t3m_01149 | Coordinates    | 16097..16435(+)                                   |      |
| 2572232793 | t3m_01149 | DNA_length     | 339bp                                             |      |
| 2572232793 | t3m_01149 | Protein_length | 112aa                                             |      |
| 2572232793 | t3m_01149 | GC             |                                                   | 0.62 |
| 2572232793 | t3m_01149 | Transmembrane  | Yes                                               |      |
| 2572232794 | t3m_01150 | Locus_type     | CDS                                               |      |
| 2572232794 | t3m_01150 | Product_name   | hypothetical protein                              |      |
| 2572232794 | t3m_01150 | Scaffold       | t3m_contig_70_195_len_26934_read_count_2495649.25 |      |
| 2572232794 | t3m_01150 | Coordinates    | 16436..16687(+)                                   |      |
| 2572232794 | t3m_01150 | DNA_length     | 252bp                                             |      |
| 2572232794 | t3m_01150 | Protein_length | 83aa                                              |      |

|            |           |                |                                                   |      |
|------------|-----------|----------------|---------------------------------------------------|------|
| 2572232794 | t3m_01150 | GC             |                                                   | 0.65 |
| 2572232795 | t3m_01151 | Locus_type     | CDS                                               |      |
| 2572232795 | t3m_01151 | Product_name   | hypothetical protein                              |      |
| 2572232795 | t3m_01151 | Scaffold       | t3m_contig_70_195_len_26934_read_count_2495649.25 |      |
| 2572232795 | t3m_01151 | Coordinates    | 16693..17022(+)                                   |      |
| 2572232795 | t3m_01151 | DNA_length     | 330bp                                             |      |
| 2572232795 | t3m_01151 | Protein_length | 109aa                                             |      |
| 2572232795 | t3m_01151 | GC             |                                                   | 0.64 |
| 2572232796 | t3m_01152 | Locus_type     | CDS                                               |      |
| 2572232796 | t3m_01152 | Product_name   | hypothetical protein                              |      |
| 2572232796 | t3m_01152 | Scaffold       | t3m_contig_70_195_len_26934_read_count_2495649.25 |      |
| 2572232796 | t3m_01152 | Coordinates    | 17042..17305(+)                                   |      |
| 2572232796 | t3m_01152 | DNA_length     | 264bp                                             |      |
| 2572232796 | t3m_01152 | Protein_length | 87aa                                              |      |
| 2572232796 | t3m_01152 | GC             |                                                   | 0.67 |
| 2572232797 | t3m_01153 | Locus_type     | CDS                                               |      |
| 2572232797 | t3m_01153 | Product_name   | hypothetical protein                              |      |
| 2572232797 | t3m_01153 | Scaffold       | t3m_contig_70_195_len_26934_read_count_2495649.25 |      |
| 2572232797 | t3m_01153 | Coordinates    | 17310..17528(+)                                   |      |
| 2572232797 | t3m_01153 | DNA_length     | 219bp                                             |      |
| 2572232797 | t3m_01153 | Protein_length | 72aa                                              |      |
| 2572232797 | t3m_01153 | GC             |                                                   | 0.64 |
| 2572232797 | t3m_01153 | Transmembrane  | Yes                                               |      |
| 2572232798 | t3m_01154 | Locus_type     | CDS                                               |      |
| 2572232798 | t3m_01154 | Product_name   | hypothetical protein                              |      |
| 2572232798 | t3m_01154 | Scaffold       | t3m_contig_70_195_len_26934_read_count_2495649.25 |      |
| 2572232798 | t3m_01154 | Coordinates    | 17531..17899(+)                                   |      |
| 2572232798 | t3m_01154 | DNA_length     | 369bp                                             |      |
| 2572232798 | t3m_01154 | Protein_length | 122aa                                             |      |
| 2572232798 | t3m_01154 | GC             |                                                   | 0.67 |



|            |           |                |                                                   |      |
|------------|-----------|----------------|---------------------------------------------------|------|
| 2572232799 | t3m_01155 | Locus_type     | CDS                                               |      |
| 2572232799 | t3m_01155 | Product_name   | hypothetical protein                              |      |
| 2572232799 | t3m_01155 | Scaffold       | t3m_contig_70_195_len_26934_read_count_2495649.25 |      |
| 2572232799 | t3m_01155 | Coordinates    | 17900..18385(+)                                   |      |
| 2572232799 | t3m_01155 | DNA_length     | 486bp                                             |      |
| 2572232799 | t3m_01155 | Protein_length | 161aa                                             |      |
| 2572232799 | t3m_01155 | GC             |                                                   | 0.61 |
|            |           |                |                                                   |      |
| 2572232800 | t3m_01156 | Locus_type     | CDS                                               |      |
| 2572232800 | t3m_01156 | Product_name   | hypothetical protein                              |      |
| 2572232800 | t3m_01156 | Scaffold       | t3m_contig_70_195_len_26934_read_count_2495649.25 |      |
| 2572232800 | t3m_01156 | Coordinates    | 18390..18599(+)                                   |      |
| 2572232800 | t3m_01156 | DNA_length     | 210bp                                             |      |
| 2572232800 | t3m_01156 | Protein_length | 69aa                                              |      |
| 2572232800 | t3m_01156 | GC             |                                                   | 0.61 |
|            |           |                |                                                   |      |
| 2572232801 | t3m_01157 | Locus_type     | CDS                                               |      |
| 2572232801 | t3m_01157 | Product_name   | hypothetical protein                              |      |
| 2572232801 | t3m_01157 | Scaffold       | t3m_contig_70_195_len_26934_read_count_2495649.25 |      |
| 2572232801 | t3m_01157 | Coordinates    | 18600..18842(+)                                   |      |
| 2572232801 | t3m_01157 | DNA_length     | 243bp                                             |      |
| 2572232801 | t3m_01157 | Protein_length | 80aa                                              |      |
| 2572232801 | t3m_01157 | GC             |                                                   | 0.63 |
|            |           |                |                                                   |      |
| 2572232802 | t3m_01158 | Locus_type     | CDS                                               |      |
| 2572232802 | t3m_01158 | Product_name   | hypothetical protein                              |      |
| 2572232802 | t3m_01158 | Scaffold       | t3m_contig_70_195_len_26934_read_count_2495649.25 |      |
| 2572232802 | t3m_01158 | Coordinates    | 18843..19214(+)                                   |      |
| 2572232802 | t3m_01158 | DNA_length     | 372bp                                             |      |
| 2572232802 | t3m_01158 | Protein_length | 123aa                                             |      |
| 2572232802 | t3m_01158 | GC             |                                                   | 0.61 |
|            |           |                |                                                   |      |
| 2572232803 | t3m_01159 | Locus_type     | CDS                                               |      |

|            |           |                |                                                   |      |
|------------|-----------|----------------|---------------------------------------------------|------|
| 2572232803 | t3m_01159 | Product_name   | hypothetical protein                              |      |
| 2572232803 | t3m_01159 | Scaffold       | t3m_contig_70_195_len_26934_read_count_2495649.25 |      |
| 2572232803 | t3m_01159 | Coordinates    | 19215..19388(+)                                   |      |
| 2572232803 | t3m_01159 | DNA_length     | 174bp                                             |      |
| 2572232803 | t3m_01159 | Protein_length | 57aa                                              |      |
| 2572232803 | t3m_01159 | GC             |                                                   | 0.64 |
| 2572232803 | t3m_01159 | Transmembrane  | Yes                                               |      |
|            |           |                |                                                   |      |
| 2572232804 | t3m_01160 | Locus_type     | CDS                                               |      |
| 2572232804 | t3m_01160 | Product_name   | hypothetical protein                              |      |
| 2572232804 | t3m_01160 | Scaffold       | t3m_contig_70_195_len_26934_read_count_2495649.25 |      |
| 2572232804 | t3m_01160 | Coordinates    | 19385..19600(+)                                   |      |
| 2572232804 | t3m_01160 | DNA_length     | 216bp                                             |      |
| 2572232804 | t3m_01160 | Protein_length | 71aa                                              |      |
| 2572232804 | t3m_01160 | GC             |                                                   | 0.62 |
|            |           |                |                                                   |      |
| 2572232805 | t3m_01161 | Locus_type     | CDS                                               |      |
| 2572232805 | t3m_01161 | Product_name   | hypothetical protein                              |      |
| 2572232805 | t3m_01161 | Scaffold       | t3m_contig_70_195_len_26934_read_count_2495649.25 |      |
| 2572232805 | t3m_01161 | Coordinates    | 19601..19843(+)                                   |      |
| 2572232805 | t3m_01161 | DNA_length     | 243bp                                             |      |
| 2572232805 | t3m_01161 | Protein_length | 80aa                                              |      |
| 2572232805 | t3m_01161 | GC             |                                                   | 0.62 |
|            |           |                |                                                   |      |
| 2572232806 | t3m_01162 | Locus_type     | CDS                                               |      |
| 2572232806 | t3m_01162 | Product_name   | hypothetical protein                              |      |
| 2572232806 | t3m_01162 | Scaffold       | t3m_contig_70_195_len_26934_read_count_2495649.25 |      |
| 2572232806 | t3m_01162 | Coordinates    | 19882..20172(+)                                   |      |
| 2572232806 | t3m_01162 | DNA_length     | 291bp                                             |      |
| 2572232806 | t3m_01162 | Protein_length | 96aa                                              |      |
| 2572232806 | t3m_01162 | GC             |                                                   | 0.61 |
| 2572232806 | t3m_01162 | Transmembrane  | Yes                                               |      |
|            |           |                |                                                   |      |
| 2572232807 | t3m_01163 | Locus_type     | CDS                                               |      |

|            |           |                |                                                   |      |
|------------|-----------|----------------|---------------------------------------------------|------|
| 2572232807 | t3m_01163 | Product_name   | hypothetical protein                              |      |
| 2572232807 | t3m_01163 | Scaffold       | t3m_contig_70_195_len_26934_read_count_2495649.25 |      |
| 2572232807 | t3m_01163 | Coordinates    | 20183..20461(+)                                   |      |
| 2572232807 | t3m_01163 | DNA_length     | 279bp                                             |      |
| 2572232807 | t3m_01163 | Protein_length | 92aa                                              |      |
| 2572232807 | t3m_01163 | GC             |                                                   | 0.59 |
| 2572232807 | t3m_01163 | Transmembrane  | Yes                                               |      |
|            |           |                |                                                   |      |
| 2572232808 | t3m_01164 | Locus_type     | CDS                                               |      |
| 2572232808 | t3m_01164 | Product_name   | hypothetical protein                              |      |
| 2572232808 | t3m_01164 | Scaffold       | t3m_contig_70_195_len_26934_read_count_2495649.25 |      |
| 2572232808 | t3m_01164 | Coordinates    | 20481..20942(+)                                   |      |
| 2572232808 | t3m_01164 | DNA_length     | 462bp                                             |      |
| 2572232808 | t3m_01164 | Protein_length | 153aa                                             |      |
| 2572232808 | t3m_01164 | GC             |                                                   | 0.61 |
| 2572232808 | t3m_01164 | Transmembrane  | Yes                                               |      |
|            |           |                |                                                   |      |
| 2572232809 | t3m_01165 | Locus_type     | CDS                                               |      |
| 2572232809 | t3m_01165 | Product_name   | hypothetical protein                              |      |
| 2572232809 | t3m_01165 | Scaffold       | t3m_contig_70_195_len_26934_read_count_2495649.25 |      |
| 2572232809 | t3m_01165 | Coordinates    | 20936..21394(+)                                   |      |
| 2572232809 | t3m_01165 | DNA_length     | 459bp                                             |      |
| 2572232809 | t3m_01165 | Protein_length | 152aa                                             |      |
| 2572232809 | t3m_01165 | GC             |                                                   | 0.68 |
|            |           |                |                                                   |      |
| 2572232810 | t3m_01166 | Locus_type     | CDS                                               |      |
| 2572232810 | t3m_01166 | Product_name   | hypothetical protein                              |      |
| 2572232810 | t3m_01166 | Scaffold       | t3m_contig_70_195_len_26934_read_count_2495649.25 |      |
| 2572232810 | t3m_01166 | Coordinates    | 21395..21793(+)                                   |      |
| 2572232810 | t3m_01166 | DNA_length     | 399bp                                             |      |
| 2572232810 | t3m_01166 | Protein_length | 132aa                                             |      |
| 2572232810 | t3m_01166 | GC             |                                                   | 0.66 |
|            |           |                |                                                   |      |
| 2572232811 | t3m_01167 | Locus_type     | CDS                                               |      |

|            |           |                |     |                                                   |          |
|------------|-----------|----------------|-----|---------------------------------------------------|----------|
| 2572232811 | t3m_01167 | Product_name   |     | hypothetical protein                              |          |
| 2572232811 | t3m_01167 | Scaffold       |     | t3m_contig_70_195_len_26934_read_count_2495649.25 |          |
| 2572232811 | t3m_01167 | Coordinates    |     | 21796..22047(+)                                   |          |
| 2572232811 | t3m_01167 | DNA_length     |     | 252bp                                             |          |
| 2572232811 | t3m_01167 | Protein_length |     | 83aa                                              |          |
| 2572232811 | t3m_01167 | GC             |     |                                                   | 0.6      |
| 2572232811 | t3m_01167 | Transmembrane  |     | Yes                                               |          |
|            |           |                |     |                                                   |          |
| 2572232812 | t3m_01168 | Locus_type     |     | CDS                                               |          |
| 2572232812 | t3m_01168 | Product_name   |     | hypothetical protein                              |          |
| 2572232812 | t3m_01168 | Scaffold       |     | t3m_contig_70_195_len_26934_read_count_2495649.25 |          |
| 2572232812 | t3m_01168 | Coordinates    |     | 22078..23802(+)                                   |          |
| 2572232812 | t3m_01168 | DNA_length     |     | 1725bp                                            |          |
| 2572232812 | t3m_01168 | Protein_length |     | 574aa                                             |          |
| 2572232812 | t3m_01168 | GC             |     |                                                   | 0.6      |
| 2572232812 | t3m_01168 | Transmembrane  |     | Yes                                               |          |
|            |           |                |     |                                                   |          |
| 2572232813 | t3m_01169 | Locus_type     |     | CDS                                               |          |
| 2572232813 | t3m_01169 | Product_name   |     | hypothetical protein                              |          |
| 2572232813 | t3m_01169 | Scaffold       |     | t3m_contig_70_195_len_26934_read_count_2495649.25 |          |
| 2572232813 | t3m_01169 | Coordinates    |     | 23819..25030(+)                                   |          |
| 2572232813 | t3m_01169 | DNA_length     |     | 1212bp                                            |          |
| 2572232813 | t3m_01169 | Protein_length |     | 403aa                                             |          |
| 2572232813 | t3m_01169 | GC             |     |                                                   | 0.61     |
| 2572232813 | t3m_01169 | Transmembrane  |     | Yes                                               |          |
|            |           |                |     |                                                   |          |
| 2572232814 | t3m_01170 | pfam00801      | PKD |                                                   | 3.40E-07 |
| 2572232814 | t3m_01170 | Locus_type     |     | CDS                                               |          |
| 2572232814 | t3m_01170 | Product_name   |     | PKD domain                                        |          |
| 2572232814 | t3m_01170 | Scaffold       |     | t3m_contig_70_195_len_26934_read_count_2495649.25 |          |
| 2572232814 | t3m_01170 | Coordinates    |     | 25060..26058(+)                                   |          |
| 2572232814 | t3m_01170 | DNA_length     |     | 999bp                                             |          |
| 2572232814 | t3m_01170 | Protein_length |     | 332aa                                             |          |
| 2572232814 | t3m_01170 | GC             |     |                                                   | 0.62     |

|            |           |                |                                                   |          |
|------------|-----------|----------------|---------------------------------------------------|----------|
| 2572232814 | t3m_01170 | Transmembrane  | Yes                                               |          |
| 2572232815 | t3m_01171 | Locus_type     | CDS                                               |          |
| 2572232815 | t3m_01171 | Product_name   | hypothetical protein                              |          |
| 2572232815 | t3m_01171 | Scaffold       | t3m_contig_70_195_len_26934_read_count_2495649.25 |          |
| 2572232815 | t3m_01171 | Coordinates    | 26117..26533(+)                                   |          |
| 2572232815 | t3m_01171 | DNA_length     | 417bp                                             |          |
| 2572232815 | t3m_01171 | Protein_length | 138aa                                             |          |
| 2572232815 | t3m_01171 | GC             |                                                   | 0.65     |
| 2572232816 | t3m_01172 | Locus_type     | CDS                                               |          |
| 2572232816 | t3m_01172 | Product_name   | hypothetical protein                              |          |
| 2572232816 | t3m_01172 | Scaffold       | t3m_contig_70_195_len_26934_read_count_2495649.25 |          |
| 2572232816 | t3m_01172 | Coordinates    | 26534..26875(+)                                   |          |
| 2572232816 | t3m_01172 | DNA_length     | 342bp                                             |          |
| 2572232816 | t3m_01172 | Protein_length | 113aa                                             |          |
| 2572232816 | t3m_01172 | GC             |                                                   | 0.61     |
| 2572232817 | t3m_01173 | COG_category   | [R] General function prediction only              |          |
| 2572232817 | t3m_01173 | COG1938        | Archaeal enzymes of ATP-grasp superfamily         | 2.00E-39 |
| 2572232817 | t3m_01173 | pfam09754      | PAC2                                              | 2.50E-28 |
| 2572232817 | t3m_01173 | TIGR00161      | TIGR00161 family protein                          | 7.10E-44 |
| 2572232817 | t3m_01173 | KO:K06869      | uncharacterized protein                           | 0.00E+00 |
| 2572232817 | t3m_01173 | Locus_type     | CDS                                               |          |
| 2572232817 | t3m_01173 | Product_name   | Archaeal enzymes of ATP-grasp superfamily         |          |
| 2572232817 | t3m_01173 | Scaffold       | t3m_contig_70_201_len_26407_read_count_2002865.26 |          |
| 2572232817 | t3m_01173 | Coordinates    | 241..1056(-)                                      |          |
| 2572232817 | t3m_01173 | DNA_length     | 816bp                                             |          |
| 2572232817 | t3m_01173 | Protein_length | 271aa                                             |          |
| 2572232817 | t3m_01173 | GC             |                                                   | 0.67     |
| 2572232818 | t3m_01174 | Locus_type     | CDS                                               |          |
| 2572232818 | t3m_01174 | Product_name   | hypothetical protein                              |          |
| 2572232818 | t3m_01174 | Scaffold       | t3m_contig_70_201_len_26407_read_count_2002865.26 |          |

|            |           |                |                                                                                        |           |
|------------|-----------|----------------|----------------------------------------------------------------------------------------|-----------|
| 2572232818 | t3m_01174 | Coordinates    | 1061..1420(-)                                                                          |           |
| 2572232818 | t3m_01174 | DNA_length     | 360bp                                                                                  |           |
| 2572232818 | t3m_01174 | Protein_length | 119aa                                                                                  |           |
| 2572232818 | t3m_01174 | GC             |                                                                                        | 0.67      |
| 2572232819 | t3m_01175 | COG_category   | [K] Transcription                                                                      |           |
| 2572232819 | t3m_01175 | COG1709        | Predicted transcriptional regulator                                                    | 6.00E-66  |
| 2572232819 | t3m_01175 | pfam13560      | HTH_31                                                                                 | 1.10E-08  |
| 2572232819 | t3m_01175 | KO:K07731      | putative transcriptional regulator                                                     | 0.00E+00  |
| 2572232819 | t3m_01175 | Locus_type     | CDS                                                                                    |           |
| 2572232819 | t3m_01175 | Product_name   | Predicted transcriptional regulator                                                    |           |
| 2572232819 | t3m_01175 | Scaffold       | t3m_contig_70_201_len_26407_read_count_2002865.26                                      |           |
| 2572232819 | t3m_01175 | Coordinates    | 1772..2461(+)                                                                          |           |
| 2572232819 | t3m_01175 | DNA_length     | 690bp                                                                                  |           |
| 2572232819 | t3m_01175 | Protein_length | 229aa                                                                                  |           |
| 2572232819 | t3m_01175 | GC             |                                                                                        | 0.69      |
| 2572232820 | t3m_01176 | KEGG_module    | M00095: C5 isoprenoid biosynthesis, mevalonate pathway                                 |           |
| 2572232820 | t3m_01176 | KEGG_module    | M00088: Ketone body biosynthesis, acetyl-CoA => acetoacetate/3-hydroxybutyrate/acetone |           |
| 2572232820 | t3m_01176 | Metacyc        | PWY-6174: mevalonate pathway II (archaea)                                              |           |
| 2572232820 | t3m_01176 | Metacyc        | PWY66-367: ketogenesis                                                                 |           |
| 2572232820 | t3m_01176 | Metacyc        | PWY-922: mevalonate pathway I                                                          |           |
| 2572232820 | t3m_01176 | IMG_pathway    | 178: Mevalonate pathway for isopentenyl pyrophosphate synthesis                        |           |
| 2572232820 | t3m_01176 | IMG_pathway    | 591: Archaeal mevalonate pathway for isopentenyl pyrophosphate synthesis               |           |
| 2572232820 | t3m_01176 | COG_category   | [I] Lipid transport and metabolism                                                     |           |
| 2572232820 | t3m_01176 | COG3425        | 3-hydroxy-3-methylglutaryl CoA synthase                                                | 1.00E-103 |
| 2572232820 | t3m_01176 | pfam01154      | HMG_CoA_synt_N                                                                         | 1.10E-06  |
| 2572232820 | t3m_01176 | pfam08541      | ACP_syn_III_C                                                                          | 2.30E-10  |
| 2572232820 | t3m_01176 | EC:2.3.3.10    | Hydroxymethylglutaryl-CoA synthase.                                                    |           |
| 2572232820 | t3m_01176 | TIGR00748      | hydroxymethylglutaryl-CoA synthase, putative                                           | 0.00E+00  |
| 2572232820 | t3m_01176 | KO:K01641      | hydroxymethylglutaryl-CoA synthase [EC:2.3.3.10]                                       | 0.00E+00  |
| 2572232820 | t3m_01176 | ITERM:00461    | hydroxymethylglutaryl-CoA synthase (EC 2.3.3.10)                                       |           |
| 2572232820 | t3m_01176 | Locus_type     | CDS                                                                                    |           |
| 2572232820 | t3m_01176 | Product_name   | hydroxymethylglutaryl-CoA synthase (EC 2.3.3.10)                                       |           |

|            |           |                |                                                                                        |          |
|------------|-----------|----------------|----------------------------------------------------------------------------------------|----------|
| 2572232820 | t3m_01176 | Scaffold       | t3m_contig_70_201_len_26407_read_count_2002865.26                                      |          |
| 2572232820 | t3m_01176 | Coordinates    | 2480..3532(+)                                                                          |          |
| 2572232820 | t3m_01176 | DNA_length     | 1053bp                                                                                 |          |
| 2572232820 | t3m_01176 | Protein_length | 350aa                                                                                  |          |
| 2572232820 | t3m_01176 | GC             |                                                                                        | 0.69     |
| 2572232821 | t3m_01177 | KEGG_module    | M00088: Ketone body biosynthesis, acetyl-CoA => acetoacetate/3-hydroxybutyrate/acetone |          |
| 2572232821 | t3m_01177 | KEGG_module    | M00375: Hydroxypropionate-hydroxybutylate cycle                                        |          |
| 2572232821 | t3m_01177 | KEGG_module    | M00373: Ethylmalonyl pathway                                                           |          |
| 2572232821 | t3m_01177 | KEGG_module    | M00095: C5 isoprenoid biosynthesis, mevalonate pathway                                 |          |
| 2572232821 | t3m_01177 | KEGG_module    | M00374: Dicarboxylate-hydroxybutyrate cycle                                            |          |
| 2572232821 | t3m_01177 | Metacyc        | PWY-922: mevalonate pathway I                                                          |          |
| 2572232821 | t3m_01177 | Metacyc        | PWY-5741: ethylmalonyl pathway                                                         |          |
| 2572232821 | t3m_01177 | Metacyc        | P163-PWY: lysine fermentation to acetate and butyrate                                  |          |
| 2572232821 | t3m_01177 | Metacyc        | PWY-6588: pyruvate fermentation to acetone                                             |          |
| 2572232821 | t3m_01177 | Metacyc        | PWY66-367: ketogenesis                                                                 |          |
| 2572232821 | t3m_01177 | Metacyc        | CENTFERM-PWY: pyruvate fermentation to butanoate                                       |          |
| 2572232821 | t3m_01177 | Metacyc        | PWY66-368: ketolysis                                                                   |          |
| 2572232821 | t3m_01177 | Metacyc        | PWY-6876: isopropanol biosynthesis                                                     |          |
| 2572232821 | t3m_01177 | Metacyc        | PWY-5676: acetyl-CoA fermentation to butyrate II                                       |          |
| 2572232821 | t3m_01177 | Metacyc        | PWY-5789: 3-hydroxypropionate/4-hydroxybutyrate cycle                                  |          |
| 2572232821 | t3m_01177 | Metacyc        | PWY-5109: 2-methylbutyrate biosynthesis                                                |          |
| 2572232821 | t3m_01177 | Metacyc        | PWY-6863: pyruvate fermentation to hexanol                                             |          |
| 2572232821 | t3m_01177 | Metacyc        | PWY-6583: pyruvate fermentation to butanol I                                           |          |
| 2572232821 | t3m_01177 | Metacyc        | PWY-6174: mevalonate pathway II (archaea)                                              |          |
| 2572232821 | t3m_01177 | Metacyc        | PWY1-3: polyhydroxybutyrate biosynthesis                                               |          |
| 2572232821 | t3m_01177 | Metacyc        | PWY-5177: glutaryl-CoA degradation                                                     |          |
| 2572232821 | t3m_01177 | Metacyc        | PWY-6883: pyruvate fermentation to butanol II                                          |          |
| 2572232821 | t3m_01177 | Metacyc        | ILEUDEG-PWY: isoleucine degradation I                                                  |          |
| 2572232821 | t3m_01177 | Metacyc        | PWY-7003: glycerol degradation to butanol                                              |          |
| 2572232821 | t3m_01177 | Metacyc        | ACETOACETATE-DEG-PWY: acetoacetate degradation (to acetyl CoA)                         |          |
| 2572232821 | t3m_01177 | COG_category   | [I] Lipid transport and metabolism                                                     |          |
| 2572232821 | t3m_01177 | COG0183        | Acetyl-CoA acetyltransferase                                                           | 3.00E-65 |
| 2572232821 | t3m_01177 | pfam00108      | Thiolase_N                                                                             | 6.70E-06 |

|            |           |                |                                                               |          |
|------------|-----------|----------------|---------------------------------------------------------------|----------|
| 2572232821 | t3m_01177 | pfam02803      | Thiolase_C                                                    | 7.20E-09 |
| 2572232821 | t3m_01177 | EC:2.3.1.9     | Acetyl-CoA C-acetyltransferase.                               |          |
| 2572232821 | t3m_01177 | KO:K00626      | acetyl-CoA C-acetyltransferase [EC:2.3.1.9]                   | 0.00E+00 |
| 2572232821 | t3m_01177 | Locus_type     | CDS                                                           |          |
| 2572232821 | t3m_01177 | Product_name   | Acetyl-CoA acetyltransferase                                  |          |
| 2572232821 | t3m_01177 | Scaffold       | t3m_contig_70_201_len_26407_read_count_2002865.26             |          |
| 2572232821 | t3m_01177 | Coordinates    | 3535..4704(+)                                                 |          |
| 2572232821 | t3m_01177 | DNA_length     | 1170bp                                                        |          |
| 2572232821 | t3m_01177 | Protein_length | 389aa                                                         |          |
| 2572232821 | t3m_01177 | GC             |                                                               | 0.7      |
| 2572232822 | t3m_01178 | COG_category   | [R] General function prediction only                          |          |
| 2572232822 | t3m_01178 | COG1545        | Predicted nucleic-acid-binding protein containing a Zn-ribbon | 9.00E-30 |
| 2572232822 | t3m_01178 | pfam12172      | DUF35_N                                                       | 5.40E-08 |
| 2572232822 | t3m_01178 | pfam01796      | DUF35                                                         | 4.50E-17 |
| 2572232822 | t3m_01178 | Locus_type     | CDS                                                           |          |
| 2572232822 | t3m_01178 | Product_name   | Predicted nucleic-acid-binding protein containing a Zn-ribbon |          |
| 2572232822 | t3m_01178 | Scaffold       | t3m_contig_70_201_len_26407_read_count_2002865.26             |          |
| 2572232822 | t3m_01178 | Coordinates    | 4714..5205(+)                                                 |          |
| 2572232822 | t3m_01178 | DNA_length     | 492bp                                                         |          |
| 2572232822 | t3m_01178 | Protein_length | 163aa                                                         |          |
| 2572232822 | t3m_01178 | GC             |                                                               | 0.67     |
| 2572232823 | t3m_01179 | pfam05763      | DUF835                                                        | 9.10E-07 |
| 2572232823 | t3m_01179 | Locus_type     | CDS                                                           |          |
| 2572232823 | t3m_01179 | Product_name   | Protein of unknown function (DUF835)                          |          |
| 2572232823 | t3m_01179 | Scaffold       | t3m_contig_70_201_len_26407_read_count_2002865.26             |          |
| 2572232823 | t3m_01179 | Coordinates    | 5202..5990(+)                                                 |          |
| 2572232823 | t3m_01179 | DNA_length     | 789bp                                                         |          |
| 2572232823 | t3m_01179 | Protein_length | 262aa                                                         |          |
| 2572232823 | t3m_01179 | GC             |                                                               | 0.73     |
| 2572232824 | t3m_01180 | COG_category   | [V] Defense mechanisms                                        |          |
| 2572232824 | t3m_01180 | COG1680        | Beta-lactamase class C and other penicillin binding proteins  | 1.00E-45 |



|            |           |                |                                   |                                                              |          |
|------------|-----------|----------------|-----------------------------------|--------------------------------------------------------------|----------|
| 2572232824 | t3m_01180 | pfam00144      | Beta-lactamase                    |                                                              | 1.20E-63 |
| 2572232824 | t3m_01180 | Locus_type     |                                   | CDS                                                          |          |
| 2572232824 | t3m_01180 | Product_name   |                                   | Beta-lactamase class C and other penicillin binding proteins |          |
| 2572232824 | t3m_01180 | Scaffold       |                                   | t3m_contig_70_201_len_26407_read_count_2002865.26            |          |
| 2572232824 | t3m_01180 | Coordinates    |                                   | 5994..7466(-)                                                |          |
| 2572232824 | t3m_01180 | DNA_length     |                                   | 1473bp                                                       |          |
| 2572232824 | t3m_01180 | Protein_length |                                   | 490aa                                                        |          |
| 2572232824 | t3m_01180 | GC             |                                   |                                                              | 0.69     |
|            |           |                |                                   |                                                              |          |
| 2572232825 | t3m_01181 | Locus_type     |                                   | CDS                                                          |          |
| 2572232825 | t3m_01181 | Product_name   |                                   | hypothetical protein                                         |          |
| 2572232825 | t3m_01181 | Scaffold       |                                   | t3m_contig_70_201_len_26407_read_count_2002865.26            |          |
| 2572232825 | t3m_01181 | Coordinates    |                                   | 7665..8729(+)                                                |          |
| 2572232825 | t3m_01181 | DNA_length     |                                   | 1065bp                                                       |          |
| 2572232825 | t3m_01181 | Protein_length |                                   | 354aa                                                        |          |
| 2572232825 | t3m_01181 | GC             |                                   |                                                              | 0.71     |
|            |           |                |                                   |                                                              |          |
| 2572232826 | t3m_01182 | COG_category   | [S] Function unknown              |                                                              |          |
| 2572232826 | t3m_01182 | COG1628        | Uncharacterized conserved protein |                                                              | 7.00E-30 |
| 2572232826 | t3m_01182 | pfam01949      | DUF99                             |                                                              | 4.20E-42 |
| 2572232826 | t3m_01182 | KO:K09120      | hypothetical protein              |                                                              | 8.30E-24 |
| 2572232826 | t3m_01182 | Locus_type     |                                   | CDS                                                          |          |
| 2572232826 | t3m_01182 | Product_name   |                                   | Uncharacterized conserved protein                            |          |
| 2572232826 | t3m_01182 | Scaffold       |                                   | t3m_contig_70_201_len_26407_read_count_2002865.26            |          |
| 2572232826 | t3m_01182 | Coordinates    |                                   | 8867..9418(-)                                                |          |
| 2572232826 | t3m_01182 | DNA_length     |                                   | 552bp                                                        |          |
| 2572232826 | t3m_01182 | Protein_length |                                   | 183aa                                                        |          |
| 2572232826 | t3m_01182 | GC             |                                   |                                                              | 0.73     |
|            |           |                |                                   |                                                              |          |
| 2572232827 | t3m_01183 | pfam13620      | CarboxypepD_reg                   |                                                              | 1.00E-06 |
| 2572232827 | t3m_01183 | Locus_type     |                                   | CDS                                                          |          |
| 2572232827 | t3m_01183 | Product_name   |                                   | Carboxypeptidase regulatory-like domain                      |          |
| 2572232827 | t3m_01183 | Scaffold       |                                   | t3m_contig_70_201_len_26407_read_count_2002865.26            |          |
| 2572232827 | t3m_01183 | Coordinates    |                                   | 9497..10423(+)                                               |          |

|            |           |                |                                                            |           |
|------------|-----------|----------------|------------------------------------------------------------|-----------|
| 2572232827 | t3m_01183 | DNA_length     | 927bp                                                      |           |
| 2572232827 | t3m_01183 | Protein_length | 308aa                                                      |           |
| 2572232827 | t3m_01183 | GC             |                                                            | 0.73      |
| 2572232827 | t3m_01183 | Transmembrane  | Yes                                                        |           |
| 2572232828 | t3m_01184 | COG_category   | [S] Function unknown                                       |           |
| 2572232828 | t3m_01184 | COG4911        | Uncharacterized conserved protein                          | 5.00E-13  |
| 2572232828 | t3m_01184 | pfam09969      | DUF2203                                                    | 6.80E-25  |
| 2572232828 | t3m_01184 | Locus_type     | CDS                                                        |           |
| 2572232828 | t3m_01184 | Product_name   | Uncharacterized conserved protein                          |           |
| 2572232828 | t3m_01184 | Scaffold       | t3m_contig_70_201_len_26407_read_count_2002865.26          |           |
| 2572232828 | t3m_01184 | Coordinates    | 10420..10911(-)                                            |           |
| 2572232828 | t3m_01184 | DNA_length     | 492bp                                                      |           |
| 2572232828 | t3m_01184 | Protein_length | 163aa                                                      |           |
| 2572232828 | t3m_01184 | GC             |                                                            | 0.72      |
| 2572232829 | t3m_01185 | Metacyc        | THREONINE-DEG2-PWY: threonine degradation II               |           |
| 2572232829 | t3m_01185 | COG_category   | [H] Coenzyme transport and metabolism                      |           |
| 2572232829 | t3m_01185 | COG0156        | 7-keto-8-aminopelargonate synthetase and related enzymes   | 7.00E-116 |
| 2572232829 | t3m_01185 | pfam00155      | Aminotran_1_2                                              | 1.70E-59  |
| 2572232829 | t3m_01185 | EC:2.3.1.29    | Glycine C-acetyltransferase.                               |           |
| 2572232829 | t3m_01185 | TIGR00858      | 8-amino-7-oxononanoate synthase                            | 7.00E-119 |
| 2572232829 | t3m_01185 | TIGR01825      | pyridoxal phosphate-dependent acyltransferase, putative    | 0.00E+00  |
| 2572232829 | t3m_01185 | KO:K00639      | glycine C-acetyltransferase [EC:2.3.1.29]                  | 0.00E+00  |
| 2572232829 | t3m_01185 | Locus_type     | CDS                                                        |           |
| 2572232829 | t3m_01185 | Product_name   | 2-amino-3-ketobutyrate coenzyme A ligase (EC 2.3.1.29)     |           |
| 2572232829 | t3m_01185 | Scaffold       | t3m_contig_70_201_len_26407_read_count_2002865.26          |           |
| 2572232829 | t3m_01185 | Coordinates    | 10990..12183(-)                                            |           |
| 2572232829 | t3m_01185 | DNA_length     | 1194bp                                                     |           |
| 2572232829 | t3m_01185 | Protein_length | 397aa                                                      |           |
| 2572232829 | t3m_01185 | GC             |                                                            | 0.69      |
| 2572232830 | t3m_01186 | Metacyc        | PWY-5443: aminopropanol phosphate biosynthesis             |           |
| 2572232830 | t3m_01186 | Metacyc        | THRDLCAT-PWY: threonine degradation III (to methylglyoxal) |           |

|            |           |                |                                                                   |           |
|------------|-----------|----------------|-------------------------------------------------------------------|-----------|
| 2572232830 | t3m_01186 | Metacyc        | THREONINE-DEG2-PWY: threonine degradation II                      |           |
| 2572232830 | t3m_01186 | IMG_pathway    | 177: L-threonine conversion to glycine and acetyl-CoA             |           |
| 2572232830 | t3m_01186 | COG_category   | [E] Amino acid transport and metabolism                           |           |
| 2572232830 | t3m_01186 | COG_category   | [R] General function prediction only                              |           |
| 2572232830 | t3m_01186 | COG1063        | Threonine dehydrogenase and related Zn-dependent dehydrogenases   | 4.00E-65  |
| 2572232830 | t3m_01186 | pfam00107      | ADH_zinc_N                                                        | 1.00E-26  |
| 2572232830 | t3m_01186 | pfam08240      | ADH_N                                                             | 1.60E-30  |
| 2572232830 | t3m_01186 | EC:1.1.1.103   | L-threonine 3-dehydrogenase.                                      |           |
| 2572232830 | t3m_01186 | TIGR00692      | L-threonine 3-dehydrogenase                                       | 7.70E-124 |
| 2572232830 | t3m_01186 | TIGR01202      | 2-desacetyl-2-hydroxyethyl bacteriochlorophyllide A dehydrogenase | 1.30E-20  |
| 2572232830 | t3m_01186 | KO:K00060      | threonine 3-dehydrogenase [EC:1.1.1.103]                          | 0.00E+00  |
| 2572232830 | t3m_01186 | ITERM:00465    | L-threonine 3-dehydrogenase (EC 1.1.1.103)                        |           |
| 2572232830 | t3m_01186 | Locus_type     | CDS                                                               |           |
| 2572232830 | t3m_01186 | Product_name   | L-threonine 3-dehydrogenase (EC 1.1.1.103)                        |           |
| 2572232830 | t3m_01186 | Scaffold       | t3m_contig_70_201_len_26407_read_count_2002865.26                 |           |
| 2572232830 | t3m_01186 | Coordinates    | 12189..13250(-)                                                   |           |
| 2572232830 | t3m_01186 | DNA_length     | 1062bp                                                            |           |
| 2572232830 | t3m_01186 | Protein_length | 353aa                                                             |           |
| 2572232830 | t3m_01186 | GC             |                                                                   | 0.68      |
| 2572232831 | t3m_01187 | KEGG_module    | M00179: Ribosome, archaea                                         |           |
| 2572232831 | t3m_01187 | KEGG_module    | M00178: Ribosome, bacteria                                        |           |
| 2572232831 | t3m_01187 | COG_category   | [J] Translation, ribosomal structure and biogenesis               |           |
| 2572232831 | t3m_01187 | COG0087        | Ribosomal protein L3                                              | 4.00E-36  |
| 2572232831 | t3m_01187 | pfam00297      | Ribosomal_L3                                                      | 1.40E-62  |
| 2572232831 | t3m_01187 | TIGR03626      | archaeal ribosomal protein L3                                     | 1.70E-111 |
| 2572232831 | t3m_01187 | KO:K02906      | large subunit ribosomal protein L3                                | 0.00E+00  |
| 2572232831 | t3m_01187 | Locus_type     | CDS                                                               |           |
| 2572232831 | t3m_01187 | Product_name   | LSU ribosomal protein L3P                                         |           |
| 2572232831 | t3m_01187 | Scaffold       | t3m_contig_70_201_len_26407_read_count_2002865.26                 |           |
| 2572232831 | t3m_01187 | Coordinates    | 13554..14495(+)                                                   |           |
| 2572232831 | t3m_01187 | DNA_length     | 942bp                                                             |           |
| 2572232831 | t3m_01187 | Protein_length | 313aa                                                             |           |
| 2572232831 | t3m_01187 | GC             |                                                                   | 0.68      |

|            |           |                |                                                     |          |
|------------|-----------|----------------|-----------------------------------------------------|----------|
| 2572232832 | t3m_01188 | KEGG_module    | M00177: Ribosome, eukaryotes                        |          |
| 2572232832 | t3m_01188 | KEGG_module    | M00179: Ribosome, archaea                           |          |
| 2572232832 | t3m_01188 | COG_category   | [J] Translation, ribosomal structure and biogenesis |          |
| 2572232832 | t3m_01188 | COG0088        | Ribosomal protein L4                                | 1.00E-27 |
| 2572232832 | t3m_01188 | pfam00573      | Ribosomal_L4                                        | 3.50E-39 |
| 2572232832 | t3m_01188 | TIGR03672      | 50S ribosomal protein L4P                           | 6.70E-87 |
| 2572232832 | t3m_01188 | KO:K02930      | large subunit ribosomal protein L4e                 | 0.00E+00 |
| 2572232832 | t3m_01188 | ITERM:00203    | LSU ribosomal protein L4P                           |          |
| 2572232832 | t3m_01188 | Locus_type     | CDS                                                 |          |
| 2572232832 | t3m_01188 | Product_name   | LSU ribosomal protein L4P                           |          |
| 2572232832 | t3m_01188 | Scaffold       | t3m_contig_70_201_len_26407_read_count_2002865.26   |          |
| 2572232832 | t3m_01188 | Coordinates    | 14498..15331(+)                                     |          |
| 2572232832 | t3m_01188 | DNA_length     | 834bp                                               |          |
| 2572232832 | t3m_01188 | Protein_length | 277aa                                               |          |
| 2572232832 | t3m_01188 | GC             |                                                     | 0.74     |
| 2572232833 | t3m_01189 | KEGG_module    | M00178: Ribosome, bacteria                          |          |
| 2572232833 | t3m_01189 | KEGG_module    | M00179: Ribosome, archaea                           |          |
| 2572232833 | t3m_01189 | COG_category   | [J] Translation, ribosomal structure and biogenesis |          |
| 2572232833 | t3m_01189 | COG0089        | Ribosomal protein L23                               | 3.00E-12 |
| 2572232833 | t3m_01189 | pfam00276      | Ribosomal_L23                                       | 4.80E-13 |
| 2572232833 | t3m_01189 | KO:K02892      | large subunit ribosomal protein L23                 | 1.80E-13 |
| 2572232833 | t3m_01189 | Locus_type     | CDS                                                 |          |
| 2572232833 | t3m_01189 | Product_name   | Ribosomal protein L23                               |          |
| 2572232833 | t3m_01189 | Scaffold       | t3m_contig_70_201_len_26407_read_count_2002865.26   |          |
| 2572232833 | t3m_01189 | Coordinates    | 15328..15591(+)                                     |          |
| 2572232833 | t3m_01189 | DNA_length     | 264bp                                               |          |
| 2572232833 | t3m_01189 | Protein_length | 87aa                                                |          |
| 2572232833 | t3m_01189 | GC             |                                                     | 0.62     |
| 2572232834 | t3m_01190 | KEGG_module    | M00179: Ribosome, archaea                           |          |
| 2572232834 | t3m_01190 | KEGG_module    | M00178: Ribosome, bacteria                          |          |
| 2572232834 | t3m_01190 | COG_category   | [J] Translation, ribosomal structure and biogenesis |          |

|            |           |                |                                                          |          |
|------------|-----------|----------------|----------------------------------------------------------|----------|
| 2572232834 | t3m_01190 | COG0090        | Ribosomal protein L2                                     | 2.00E-52 |
| 2572232834 | t3m_01190 | pfam00181      | Ribosomal_L2                                             | 2.80E-06 |
| 2572232834 | t3m_01190 | pfam03947      | Ribosomal_L2_C                                           | 6.20E-39 |
| 2572232834 | t3m_01190 | KO:K02886      | large subunit ribosomal protein L2                       | 0.00E+00 |
| 2572232834 | t3m_01190 | Locus_type     | CDS                                                      |          |
| 2572232834 | t3m_01190 | Product_name   | Ribosomal protein L2                                     |          |
| 2572232834 | t3m_01190 | Scaffold       | t3m_contig_70_201_len_26407_read_count_2002865.26        |          |
| 2572232834 | t3m_01190 | Coordinates    | 15591..16319(+)                                          |          |
| 2572232834 | t3m_01190 | DNA_length     | 729bp                                                    |          |
| 2572232834 | t3m_01190 | Protein_length | 242aa                                                    |          |
| 2572232834 | t3m_01190 | GC             |                                                          | 0.72     |
| 2572232835 | t3m_01191 | KEGG_module    | M00179: Ribosome, archaea                                |          |
| 2572232835 | t3m_01191 | KEGG_module    | M00178: Ribosome, bacteria                               |          |
| 2572232835 | t3m_01191 | COG_category   | [J] Translation, ribosomal structure and biogenesis      |          |
| 2572232835 | t3m_01191 | COG0185        | Ribosomal protein S19                                    | 2.00E-23 |
| 2572232835 | t3m_01191 | pfam00203      | Ribosomal_S19                                            | 2.40E-23 |
| 2572232835 | t3m_01191 | TIGR01025      | ribosomal protein S19(archaeal)/S15(eukaryotic)          | 6.90E-53 |
| 2572232835 | t3m_01191 | KO:K02965      | small subunit ribosomal protein S19                      | 2.40E-39 |
| 2572232835 | t3m_01191 | ITERM:00334    | SSU ribosomal protein S19P                               |          |
| 2572232835 | t3m_01191 | Locus_type     | CDS                                                      |          |
| 2572232835 | t3m_01191 | Product_name   | SSU ribosomal protein S19P                               |          |
| 2572232835 | t3m_01191 | Scaffold       | t3m_contig_70_201_len_26407_read_count_2002865.26        |          |
| 2572232835 | t3m_01191 | Coordinates    | 16325..16750(+)                                          |          |
| 2572232835 | t3m_01191 | DNA_length     | 426bp                                                    |          |
| 2572232835 | t3m_01191 | Protein_length | 141aa                                                    |          |
| 2572232835 | t3m_01191 | GC             |                                                          | 0.68     |
| 2572232836 | t3m_01192 | KEGG_module    | M00179: Ribosome, archaea                                |          |
| 2572232836 | t3m_01192 | KEGG_module    | M00178: Ribosome, bacteria                               |          |
| 2572232836 | t3m_01192 | COG_category   | [J] Translation, ribosomal structure and biogenesis      |          |
| 2572232836 | t3m_01192 | COG0091        | Ribosomal protein L22                                    | 2.00E-21 |
| 2572232836 | t3m_01192 | pfam00237      | Ribosomal_L22                                            | 2.70E-33 |
| 2572232836 | t3m_01192 | TIGR01038      | ribosomal protein L22(archaeal)/L17(eukaryotic/archaeal) | 1.40E-47 |

|            |           |                |                                                          |          |
|------------|-----------|----------------|----------------------------------------------------------|----------|
| 2572232836 | t3m_01192 | KO:K02890      | large subunit ribosomal protein L22                      | 6.50E-30 |
| 2572232836 | t3m_01192 | Locus_type     | CDS                                                      |          |
| 2572232836 | t3m_01192 | Product_name   | ribosomal protein L22(archaeal)/L17(eukaryotic/archaeal) |          |
| 2572232836 | t3m_01192 | Scaffold       | t3m_contig_70_201_len_26407_read_count_2002865.26        |          |
| 2572232836 | t3m_01192 | Coordinates    | 16767..17225(+)                                          |          |
| 2572232836 | t3m_01192 | DNA_length     | 459bp                                                    |          |
| 2572232836 | t3m_01192 | Protein_length | 152aa                                                    |          |
| 2572232836 | t3m_01192 | GC             |                                                          | 0.69     |
| 2572232837 | t3m_01193 | KEGG_module    | M00178: Ribosome, bacteria                               |          |
| 2572232837 | t3m_01193 | KEGG_module    | M00179: Ribosome, archaea                                |          |
| 2572232837 | t3m_01193 | COG_category   | [J] Translation, ribosomal structure and biogenesis      |          |
| 2572232837 | t3m_01193 | COG0092        | Ribosomal protein S3                                     | 3.00E-50 |
| 2572232837 | t3m_01193 | pfam00189      | Ribosomal_S3_C                                           | 2.50E-18 |
| 2572232837 | t3m_01193 | pfam07650      | KH_2                                                     | 9.50E-09 |
| 2572232837 | t3m_01193 | TIGR01009      | ribosomal protein S3, bacterial type                     | 8.60E-30 |
| 2572232837 | t3m_01193 | TIGR01008      | ribosomal protein S3, eukaryotic/archaeal type           | 2.60E-76 |
| 2572232837 | t3m_01193 | KO:K02982      | small subunit ribosomal protein S3                       | 0.00E+00 |
| 2572232837 | t3m_01193 | Locus_type     | CDS                                                      |          |
| 2572232837 | t3m_01193 | Product_name   | SSU ribosomal protein S3P                                |          |
| 2572232837 | t3m_01193 | Scaffold       | t3m_contig_70_201_len_26407_read_count_2002865.26        |          |
| 2572232837 | t3m_01193 | Coordinates    | 17222..17914(+)                                          |          |
| 2572232837 | t3m_01193 | DNA_length     | 693bp                                                    |          |
| 2572232837 | t3m_01193 | Protein_length | 230aa                                                    |          |
| 2572232837 | t3m_01193 | GC             |                                                          | 0.68     |
| 2572232838 | t3m_01194 | KEGG_module    | M00179: Ribosome, archaea                                |          |
| 2572232838 | t3m_01194 | KEGG_module    | M00178: Ribosome, bacteria                               |          |
| 2572232838 | t3m_01194 | COG_category   | [J] Translation, ribosomal structure and biogenesis      |          |
| 2572232838 | t3m_01194 | COG0255        | Ribosomal protein L29                                    | 6.00E-05 |
| 2572232838 | t3m_01194 | pfam00831      | Ribosomal_L29                                            | 1.50E-11 |
| 2572232838 | t3m_01194 | TIGR00012      | ribosomal protein L29                                    | 1.20E-15 |
| 2572232838 | t3m_01194 | KO:K02904      | large subunit ribosomal protein L29                      | 1.60E-10 |
| 2572232838 | t3m_01194 | ITERM:00255    | LSU ribosomal protein L29P                               |          |

|            |           |                |                                                     |          |
|------------|-----------|----------------|-----------------------------------------------------|----------|
| 2572232838 | t3m_01194 | Locus_type     | CDS                                                 |          |
| 2572232838 | t3m_01194 | Product_name   | LSU ribosomal protein L29P                          |          |
| 2572232838 | t3m_01194 | Scaffold       | t3m_contig_70_201_len_26407_read_count_2002865.26   |          |
| 2572232838 | t3m_01194 | Coordinates    | 17911..18135(+)                                     |          |
| 2572232838 | t3m_01194 | DNA_length     | 225bp                                               |          |
| 2572232838 | t3m_01194 | Protein_length | 74aa                                                |          |
| 2572232838 | t3m_01194 | GC             |                                                     | 0.72     |
|            |           |                |                                                     |          |
| 2572232839 | t3m_01195 | pfam01868      | UPF0086                                             | 1.80E-05 |
| 2572232839 | t3m_01195 | Locus_type     | CDS                                                 |          |
| 2572232839 | t3m_01195 | Product_name   | Domain of unknown function UPF0086                  |          |
| 2572232839 | t3m_01195 | Scaffold       | t3m_contig_70_201_len_26407_read_count_2002865.26   |          |
| 2572232839 | t3m_01195 | Coordinates    | 18155..18481(+)                                     |          |
| 2572232839 | t3m_01195 | DNA_length     | 327bp                                               |          |
| 2572232839 | t3m_01195 | Protein_length | 108aa                                               |          |
| 2572232839 | t3m_01195 | GC             |                                                     | 0.68     |
|            |           |                |                                                     |          |
| 2572232840 | t3m_01196 | KEGG_module    | M00179: Ribosome, archaea                           |          |
| 2572232840 | t3m_01196 | KEGG_module    | M00178: Ribosome, bacteria                          |          |
| 2572232840 | t3m_01196 | COG_category   | [J] Translation, ribosomal structure and biogenesis |          |
| 2572232840 | t3m_01196 | COG0186        | Ribosomal protein S17                               | 2.00E-20 |
| 2572232840 | t3m_01196 | pfam00366      | Ribosomal_S17                                       | 1.40E-20 |
| 2572232840 | t3m_01196 | TIGR03630      | archaeal ribosomal protein S17P                     | 4.30E-45 |
| 2572232840 | t3m_01196 | KO:K02961      | small subunit ribosomal protein S17                 | 2.40E-31 |
| 2572232840 | t3m_01196 | Locus_type     | CDS                                                 |          |
| 2572232840 | t3m_01196 | Product_name   | SSU ribosomal protein S17P                          |          |
| 2572232840 | t3m_01196 | Scaffold       | t3m_contig_70_201_len_26407_read_count_2002865.26   |          |
| 2572232840 | t3m_01196 | Coordinates    | 18478..18906(+)                                     |          |
| 2572232840 | t3m_01196 | DNA_length     | 429bp                                               |          |
| 2572232840 | t3m_01196 | Protein_length | 142aa                                               |          |
| 2572232840 | t3m_01196 | GC             |                                                     | 0.72     |
|            |           |                |                                                     |          |
| 2572232841 | t3m_01197 | KEGG_module    | M00179: Ribosome, archaea                           |          |
| 2572232841 | t3m_01197 | KEGG_module    | M00178: Ribosome, bacteria                          |          |

|            |           |                |                                                     |          |
|------------|-----------|----------------|-----------------------------------------------------|----------|
| 2572232841 | t3m_01197 | COG_category   | [J] Translation, ribosomal structure and biogenesis |          |
| 2572232841 | t3m_01197 | COG0093        | Ribosomal protein L14                               | 7.00E-30 |
| 2572232841 | t3m_01197 | pfam00238      | Ribosomal_L14                                       | 8.10E-34 |
| 2572232841 | t3m_01197 | TIGR03673      | 50S ribosomal protein L14P                          | 4.70E-63 |
| 2572232841 | t3m_01197 | KO:K02874      | large subunit ribosomal protein L14                 | 0.00E+00 |
| 2572232841 | t3m_01197 | Locus_type     | CDS                                                 |          |
| 2572232841 | t3m_01197 | Product_name   | LSU ribosomal protein L14P                          |          |
| 2572232841 | t3m_01197 | Scaffold       | t3m_contig_70_201_len_26407_read_count_2002865.26   |          |
| 2572232841 | t3m_01197 | Coordinates    | 18903..19301(+)                                     |          |
| 2572232841 | t3m_01197 | DNA_length     | 399bp                                               |          |
| 2572232841 | t3m_01197 | Protein_length | 132aa                                               |          |
| 2572232841 | t3m_01197 | GC             |                                                     | 0.69     |
| 2572232842 | t3m_01198 | TIGR01080      | ribosomal protein L24p/L26e, archaeal/eukaryotic    | 8.00E-31 |
| 2572232842 | t3m_01198 | Locus_type     | CDS                                                 |          |
| 2572232842 | t3m_01198 | Product_name   | ribosomal protein L24p/L26e, archaeal/eukaryotic    |          |
| 2572232842 | t3m_01198 | Scaffold       | t3m_contig_70_201_len_26407_read_count_2002865.26   |          |
| 2572232842 | t3m_01198 | Coordinates    | 19316..19909(+)                                     |          |
| 2572232842 | t3m_01198 | DNA_length     | 594bp                                               |          |
| 2572232842 | t3m_01198 | Protein_length | 197aa                                               |          |
| 2572232842 | t3m_01198 | GC             |                                                     | 0.7      |
| 2572232843 | t3m_01199 | KEGG_module    | M00179: Ribosome, archaea                           |          |
| 2572232843 | t3m_01199 | KEGG_module    | M00177: Ribosome, eukaryotes                        |          |
| 2572232843 | t3m_01199 | COG_category   | [J] Translation, ribosomal structure and biogenesis |          |
| 2572232843 | t3m_01199 | COG1471        | Ribosomal protein S4E                               | 1.00E-61 |
| 2572232843 | t3m_01199 | pfam00900      | Ribosomal_S4e                                       | 9.10E-23 |
| 2572232843 | t3m_01199 | pfam01479      | S4                                                  | 1.10E-05 |
| 2572232843 | t3m_01199 | pfam08071      | RS4NT                                               | 2.10E-09 |
| 2572232843 | t3m_01199 | KO:K02987      | small subunit ribosomal protein S4e                 | 0.00E+00 |
| 2572232843 | t3m_01199 | Locus_type     | CDS                                                 |          |
| 2572232843 | t3m_01199 | Product_name   | Ribosomal protein S4E                               |          |
| 2572232843 | t3m_01199 | Scaffold       | t3m_contig_70_201_len_26407_read_count_2002865.26   |          |
| 2572232843 | t3m_01199 | Coordinates    | 19906..20622(+)                                     |          |



|            |           |                |                                                     |          |
|------------|-----------|----------------|-----------------------------------------------------|----------|
| 2572232843 | t3m_01199 | DNA_length     | 717bp                                               |          |
| 2572232843 | t3m_01199 | Protein_length | 238aa                                               |          |
| 2572232843 | t3m_01199 | GC             |                                                     | 0.68     |
| 2572232844 | t3m_01200 | KEGG_module    | M00178: Ribosome, bacteria                          |          |
| 2572232844 | t3m_01200 | KEGG_module    | M00179: Ribosome, archaea                           |          |
| 2572232844 | t3m_01200 | COG_category   | [J] Translation, ribosomal structure and biogenesis |          |
| 2572232844 | t3m_01200 | COG0094        | Ribosomal protein L5                                | 3.00E-36 |
| 2572232844 | t3m_01200 | pfam00673      | Ribosomal_L5_C                                      | 9.80E-22 |
| 2572232844 | t3m_01200 | pfam00281      | Ribosomal_L5                                        | 9.00E-13 |
| 2572232844 | t3m_01200 | KO:K02931      | large subunit ribosomal protein L5                  | 6.50E-40 |
| 2572232844 | t3m_01200 | ITERM:00204    | LSU ribosomal protein L5P                           |          |
| 2572232844 | t3m_01200 | Locus_type     | CDS                                                 |          |
| 2572232844 | t3m_01200 | Product_name   | LSU ribosomal protein L5P                           |          |
| 2572232844 | t3m_01200 | Scaffold       | t3m_contig_70_201_len_26407_read_count_2002865.26   |          |
| 2572232844 | t3m_01200 | Coordinates    | 20619..21182(+)                                     |          |
| 2572232844 | t3m_01200 | DNA_length     | 564bp                                               |          |
| 2572232844 | t3m_01200 | Protein_length | 187aa                                               |          |
| 2572232844 | t3m_01200 | GC             |                                                     | 0.68     |
| 2572232845 | t3m_01201 | KEGG_module    | M00178: Ribosome, bacteria                          |          |
| 2572232845 | t3m_01201 | KEGG_module    | M00179: Ribosome, archaea                           |          |
| 2572232845 | t3m_01201 | COG_category   | [J] Translation, ribosomal structure and biogenesis |          |
| 2572232845 | t3m_01201 | COG0199        | Ribosomal protein S14                               | 2.00E-04 |
| 2572232845 | t3m_01201 | pfam00253      | Ribosomal_S14                                       | 3.20E-16 |
| 2572232845 | t3m_01201 | KO:K02954      | small subunit ribosomal protein S14                 | 1.30E-16 |
| 2572232845 | t3m_01201 | Locus_type     | CDS                                                 |          |
| 2572232845 | t3m_01201 | Product_name   | SSU ribosomal protein S14P                          |          |
| 2572232845 | t3m_01201 | Scaffold       | t3m_contig_70_201_len_26407_read_count_2002865.26   |          |
| 2572232845 | t3m_01201 | Coordinates    | 21175..21324(+)                                     |          |
| 2572232845 | t3m_01201 | DNA_length     | 150bp                                               |          |
| 2572232845 | t3m_01201 | Protein_length | 49aa                                                |          |
| 2572232845 | t3m_01201 | GC             |                                                     | 0.65     |

|            |           |                |                                                     |          |
|------------|-----------|----------------|-----------------------------------------------------|----------|
| 2572232846 | t3m_01202 | KEGG_module    | M00179: Ribosome, archaea                           |          |
| 2572232846 | t3m_01202 | KEGG_module    | M00178: Ribosome, bacteria                          |          |
| 2572232846 | t3m_01202 | COG_category   | [J] Translation, ribosomal structure and biogenesis |          |
| 2572232846 | t3m_01202 | COG0096        | Ribosomal protein S8                                | 4.00E-27 |
| 2572232846 | t3m_01202 | pfam00410      | Ribosomal_S8                                        | 3.50E-20 |
| 2572232846 | t3m_01202 | KO:K02994      | small subunit ribosomal protein S8                  | 6.80E-33 |
| 2572232846 | t3m_01202 | Locus_type     | CDS                                                 |          |
| 2572232846 | t3m_01202 | Product_name   | SSU ribosomal protein S8P                           |          |
| 2572232846 | t3m_01202 | Scaffold       | t3m_contig_70_201_len_26407_read_count_2002865.26   |          |
| 2572232846 | t3m_01202 | Coordinates    | 21344..21727(+)                                     |          |
| 2572232846 | t3m_01202 | DNA_length     | 384bp                                               |          |
| 2572232846 | t3m_01202 | Protein_length | 127aa                                               |          |
| 2572232846 | t3m_01202 | GC             |                                                     | 0.66     |
| 2572232847 | t3m_01203 | KEGG_module    | M00178: Ribosome, bacteria                          |          |
| 2572232847 | t3m_01203 | KEGG_module    | M00179: Ribosome, archaea                           |          |
| 2572232847 | t3m_01203 | COG_category   | [J] Translation, ribosomal structure and biogenesis |          |
| 2572232847 | t3m_01203 | COG0097        | Ribosomal protein L6P/L9E                           | 2.00E-34 |
| 2572232847 | t3m_01203 | pfam00347      | Ribosomal_L6                                        | 6.30E-09 |
| 2572232847 | t3m_01203 | pfam00347      | Ribosomal_L6                                        | 2.80E-05 |
| 2572232847 | t3m_01203 | KO:K02933      | large subunit ribosomal protein L6                  | 7.90E-38 |
| 2572232847 | t3m_01203 | Locus_type     | CDS                                                 |          |
| 2572232847 | t3m_01203 | Product_name   | Ribosomal protein L6P/L9E                           |          |
| 2572232847 | t3m_01203 | Scaffold       | t3m_contig_70_201_len_26407_read_count_2002865.26   |          |
| 2572232847 | t3m_01203 | Coordinates    | 21717..22280(+)                                     |          |
| 2572232847 | t3m_01203 | DNA_length     | 564bp                                               |          |
| 2572232847 | t3m_01203 | Protein_length | 187aa                                               |          |
| 2572232847 | t3m_01203 | GC             |                                                     | 0.68     |
| 2572232848 | t3m_01204 | KEGG_module    | M00179: Ribosome, archaea                           |          |
| 2572232848 | t3m_01204 | KEGG_module    | M00177: Ribosome, eukaryotes                        |          |
| 2572232848 | t3m_01204 | COG_category   | [J] Translation, ribosomal structure and biogenesis |          |
| 2572232848 | t3m_01204 | COG1717        | Ribosomal protein L32E                              | 5.00E-24 |
| 2572232848 | t3m_01204 | pfam01655      | Ribosomal_L32e                                      | 5.10E-31 |

|            |           |                |                                                     |          |
|------------|-----------|----------------|-----------------------------------------------------|----------|
| 2572232848 | t3m_01204 | KO:K02912      | large subunit ribosomal protein L32e                | 1.10E-23 |
| 2572232848 | t3m_01204 | Locus_type     | CDS                                                 |          |
| 2572232848 | t3m_01204 | Product_name   | Ribosomal protein L32E                              |          |
| 2572232848 | t3m_01204 | Scaffold       | t3m_contig_70_201_len_26407_read_count_2002865.26   |          |
| 2572232848 | t3m_01204 | Coordinates    | 22280..22861(+)                                     |          |
| 2572232848 | t3m_01204 | DNA_length     | 582bp                                               |          |
| 2572232848 | t3m_01204 | Protein_length | 193aa                                               |          |
| 2572232848 | t3m_01204 | GC             |                                                     | 0.72     |
| 2572232849 | t3m_01205 | KEGG_module    | M00177: Ribosome, eukaryotes                        |          |
| 2572232849 | t3m_01205 | KEGG_module    | M00179: Ribosome, archaea                           |          |
| 2572232849 | t3m_01205 | COG_category   | [J] Translation, ribosomal structure and biogenesis |          |
| 2572232849 | t3m_01205 | COG2147        | Ribosomal protein L19E                              | 9.00E-38 |
| 2572232849 | t3m_01205 | pfam01280      | Ribosomal_L19e                                      | 1.80E-52 |
| 2572232849 | t3m_01205 | KO:K02885      | large subunit ribosomal protein L19e                | 2.60E-39 |
| 2572232849 | t3m_01205 | Locus_type     | CDS                                                 |          |
| 2572232849 | t3m_01205 | Product_name   | LSU ribosomal protein L19E                          |          |
| 2572232849 | t3m_01205 | Scaffold       | t3m_contig_70_201_len_26407_read_count_2002865.26   |          |
| 2572232849 | t3m_01205 | Coordinates    | 22865..23326(+)                                     |          |
| 2572232849 | t3m_01205 | DNA_length     | 462bp                                               |          |
| 2572232849 | t3m_01205 | Protein_length | 153aa                                               |          |
| 2572232849 | t3m_01205 | GC             |                                                     | 0.7      |
| 2572232850 | t3m_01206 | KEGG_module    | M00178: Ribosome, bacteria                          |          |
| 2572232850 | t3m_01206 | KEGG_module    | M00179: Ribosome, archaea                           |          |
| 2572232850 | t3m_01206 | COG_category   | [J] Translation, ribosomal structure and biogenesis |          |
| 2572232850 | t3m_01206 | COG0256        | Ribosomal protein L18                               | 3.00E-19 |
| 2572232850 | t3m_01206 | pfam00861      | Ribosomal_L18p                                      | 2.00E-18 |
| 2572232850 | t3m_01206 | KO:K02881      | large subunit ribosomal protein L18                 | 3.40E-35 |
| 2572232850 | t3m_01206 | ITERM:00239    | LSU ribosomal protein L18P                          |          |
| 2572232850 | t3m_01206 | Locus_type     | CDS                                                 |          |
| 2572232850 | t3m_01206 | Product_name   | LSU ribosomal protein L18P                          |          |
| 2572232850 | t3m_01206 | Scaffold       | t3m_contig_70_201_len_26407_read_count_2002865.26   |          |
| 2572232850 | t3m_01206 | Coordinates    | 23323..23850(+)                                     |          |

|            |           |                |                                                                  |          |
|------------|-----------|----------------|------------------------------------------------------------------|----------|
| 2572232850 | t3m_01206 | DNA_length     | 528bp                                                            |          |
| 2572232850 | t3m_01206 | Protein_length | 175aa                                                            |          |
| 2572232850 | t3m_01206 | GC             |                                                                  | 0.71     |
| 2572232851 | t3m_01207 | KEGG_module    | M00179: Ribosome, archaea                                        |          |
| 2572232851 | t3m_01207 | KEGG_module    | M00178: Ribosome, bacteria                                       |          |
| 2572232851 | t3m_01207 | COG_category   | [J] Translation, ribosomal structure and biogenesis              |          |
| 2572232851 | t3m_01207 | COG0098        | Ribosomal protein S5                                             | 9.00E-37 |
| 2572232851 | t3m_01207 | pfam03719      | Ribosomal_S5_C                                                   | 1.70E-16 |
| 2572232851 | t3m_01207 | pfam00333      | Ribosomal_S5                                                     | 4.20E-23 |
| 2572232851 | t3m_01207 | TIGR01020      | ribosomal protein S5(archaeal type)/S2(eukaryote cytosolic type) | 2.70E-84 |
| 2572232851 | t3m_01207 | KO:K02988      | small subunit ribosomal protein S5                               | 0.00E+00 |
| 2572232851 | t3m_01207 | ITERM:00284    | SSU ribosomal protein S5P                                        |          |
| 2572232851 | t3m_01207 | Locus_type     | CDS                                                              |          |
| 2572232851 | t3m_01207 | Product_name   | SSU ribosomal protein S5P                                        |          |
| 2572232851 | t3m_01207 | Scaffold       | t3m_contig_70_201_len_26407_read_count_2002865.26                |          |
| 2572232851 | t3m_01207 | Coordinates    | 23916..24707(+)                                                  |          |
| 2572232851 | t3m_01207 | DNA_length     | 792bp                                                            |          |
| 2572232851 | t3m_01207 | Protein_length | 263aa                                                            |          |
| 2572232851 | t3m_01207 | GC             |                                                                  | 0.73     |
| 2572232852 | t3m_01208 | KEGG_module    | M00179: Ribosome, archaea                                        |          |
| 2572232852 | t3m_01208 | KEGG_module    | M00178: Ribosome, bacteria                                       |          |
| 2572232852 | t3m_01208 | COG_category   | [J] Translation, ribosomal structure and biogenesis              |          |
| 2572232852 | t3m_01208 | COG1841        | Ribosomal protein L30/L7E                                        | 5.00E-09 |
| 2572232852 | t3m_01208 | pfam00327      | Ribosomal_L30                                                    | 7.10E-11 |
| 2572232852 | t3m_01208 | TIGR01309      | 50S ribosomal protein L30P, archaeal                             | 1.20E-42 |
| 2572232852 | t3m_01208 | KO:K02907      | large subunit ribosomal protein L30                              | 7.10E-29 |
| 2572232852 | t3m_01208 | ITERM:00257    | LSU ribosomal protein L30P                                       |          |
| 2572232852 | t3m_01208 | Locus_type     | CDS                                                              |          |
| 2572232852 | t3m_01208 | Product_name   | LSU ribosomal protein L30P                                       |          |
| 2572232852 | t3m_01208 | Scaffold       | t3m_contig_70_201_len_26407_read_count_2002865.26                |          |
| 2572232852 | t3m_01208 | Coordinates    | 24710..25168(+)                                                  |          |
| 2572232852 | t3m_01208 | DNA_length     | 459bp                                                            |          |

|            |           |                |                                                     |          |
|------------|-----------|----------------|-----------------------------------------------------|----------|
| 2572232852 | t3m_01208 | Protein_length | 152aa                                               |          |
| 2572232852 | t3m_01208 | GC             |                                                     | 0.69     |
| 2572232853 | t3m_01209 | KEGG_module    | M00179: Ribosome, archaea                           |          |
| 2572232853 | t3m_01209 | KEGG_module    | M00178: Ribosome, bacteria                          |          |
| 2572232853 | t3m_01209 | COG_category   | [J] Translation, ribosomal structure and biogenesis |          |
| 2572232853 | t3m_01209 | COG0200        | Ribosomal protein L15                               | 3.00E-08 |
| 2572232853 | t3m_01209 | pfam00828      | Ribosomal_L18e                                      | 1.70E-17 |
| 2572232853 | t3m_01209 | KO:K02876      | large subunit ribosomal protein L15                 | 2.20E-22 |
| 2572232853 | t3m_01209 | ITERM:00234    | LSU ribosomal protein L15P                          |          |
| 2572232853 | t3m_01209 | Locus_type     | CDS                                                 |          |
| 2572232853 | t3m_01209 | Product_name   | LSU ribosomal protein L15P                          |          |
| 2572232853 | t3m_01209 | Scaffold       | t3m_contig_70_201_len_26407_read_count_2002865.26   |          |
| 2572232853 | t3m_01209 | Coordinates    | 25182..25634(+)                                     |          |
| 2572232853 | t3m_01209 | DNA_length     | 453bp                                               |          |
| 2572232853 | t3m_01209 | Protein_length | 150aa                                               |          |
| 2572232853 | t3m_01209 | GC             |                                                     | 0.7      |
| 2572232854 | t3m_01210 | pfam10559      | Plug_translocon                                     | 9.80E-10 |
| 2572232854 | t3m_01210 | pfam00344      | SecY                                                | 3.80E-27 |
| 2572232854 | t3m_01210 | Locus_type     | CDS                                                 |          |
| 2572232854 | t3m_01210 | Product_name   | Plug domain of Sec61p/SecY translocase              |          |
| 2572232854 | t3m_01210 | Scaffold       | t3m_contig_70_201_len_26407_read_count_2002865.26   |          |
| 2572232854 | t3m_01210 | Coordinates    | 25671..26405(+)                                     |          |
| 2572232854 | t3m_01210 | DNA_length     | 735bp                                               |          |
| 2572232854 | t3m_01210 | Protein_length | 245aa                                               |          |
| 2572232854 | t3m_01210 | GC             |                                                     | 0.64     |
| 2572232854 | t3m_01210 | Transmembrane  | Yes                                                 |          |
| 2572232855 | t3m_01211 | KEGG_module    | M00177: Ribosome, eukaryotes                        |          |
| 2572232855 | t3m_01211 | KEGG_module    | M00179: Ribosome, archaea                           |          |
| 2572232855 | t3m_01211 | COG_category   | [J] Translation, ribosomal structure and biogenesis |          |
| 2572232855 | t3m_01211 | COG1890        | Ribosomal protein S3AE                              | 8.00E-46 |
| 2572232855 | t3m_01211 | pfam01015      | Ribosomal_S3Ae                                      | 1.50E-54 |

|            |           |                |                                                   |           |
|------------|-----------|----------------|---------------------------------------------------|-----------|
| 2572232855 | t3m_01211 | KO:K02984      | small subunit ribosomal protein S3Ae              | 3.10E-42  |
| 2572232855 | t3m_01211 | Locus_type     | CDS                                               |           |
| 2572232855 | t3m_01211 | Product_name   | Ribosomal protein S3AE                            |           |
| 2572232855 | t3m_01211 | Scaffold       | t3m_contig_70_218_len_24774_read_count_2256939.27 |           |
| 2572232855 | t3m_01211 | Coordinates    | 300..1022(+)                                      |           |
| 2572232855 | t3m_01211 | DNA_length     | 723bp                                             |           |
| 2572232855 | t3m_01211 | Protein_length | 240aa                                             |           |
| 2572232855 | t3m_01211 | GC             |                                                   | 0.67      |
| 2572232856 | t3m_01212 | Locus_type     | tRNA                                              |           |
| 2572232856 | t3m_01212 | Product_name   | tRNA_Met_CAT                                      |           |
| 2572232856 | t3m_01212 | Scaffold       | t3m_contig_70_218_len_24774_read_count_2256939.27 |           |
| 2572232856 | t3m_01212 | Coordinates    | 1057..1158(+)                                     |           |
| 2572232856 | t3m_01212 | DNA_length     | 76bp                                              |           |
| 2572232856 | t3m_01212 | GC             |                                                   | 0.63      |
| 2572232857 | t3m_01213 | COG_category   | [P] Inorganic ion transport and metabolism        |           |
| 2572232857 | t3m_01213 | COG0798        | Arsenite efflux pump ACR3 and related permeases   | 1.00E-87  |
| 2572232857 | t3m_01213 | pfam01758      | SBF                                               | 1.20E-47  |
| 2572232857 | t3m_01213 | TIGR00832      | arsenical-resistance protein                      | 1.80E-120 |
| 2572232857 | t3m_01213 | KO:K03325      | arsenite transporter, ACR3 family                 | 0.00E+00  |
| 2572232857 | t3m_01213 | Locus_type     | CDS                                               |           |
| 2572232857 | t3m_01213 | Product_name   | arsenical-resistance protein                      |           |
| 2572232857 | t3m_01213 | Scaffold       | t3m_contig_70_218_len_24774_read_count_2256939.27 |           |
| 2572232857 | t3m_01213 | Coordinates    | 1518..2618(-)                                     |           |
| 2572232857 | t3m_01213 | DNA_length     | 1101bp                                            |           |
| 2572232857 | t3m_01213 | Protein_length | 366aa                                             |           |
| 2572232857 | t3m_01213 | GC             |                                                   | 0.64      |
| 2572232857 | t3m_01213 | Transmembrane  | Yes                                               |           |
| 2572232858 | t3m_01214 | COG_category   | [T] Signal transduction mechanisms                |           |
| 2572232858 | t3m_01214 | COG0394        | Protein-tyrosine-phosphatase                      | 3.00E-23  |
| 2572232858 | t3m_01214 | pfam01451      | LMWPc                                             | 6.40E-23  |
| 2572232858 | t3m_01214 | Locus_type     | CDS                                               |           |

|            |           |                |                                                        |          |
|------------|-----------|----------------|--------------------------------------------------------|----------|
| 2572232858 | t3m_01214 | Product_name   | Protein-tyrosine-phosphatase                           |          |
| 2572232858 | t3m_01214 | Scaffold       | t3m_contig_70_218_len_24774_read_count_2256939.27      |          |
| 2572232858 | t3m_01214 | Coordinates    | 2848..3309(-)                                          |          |
| 2572232858 | t3m_01214 | DNA_length     | 462bp                                                  |          |
| 2572232858 | t3m_01214 | Protein_length | 153aa                                                  |          |
| 2572232858 | t3m_01214 | GC             |                                                        | 0.68     |
|            |           |                |                                                        |          |
| 2572232859 | t3m_01215 | pfam13847      | Methyltransf_31                                        | 1.70E-33 |
| 2572232859 | t3m_01215 | Locus_type     | CDS                                                    |          |
| 2572232859 | t3m_01215 | Product_name   | Methyltransferase domain                               |          |
| 2572232859 | t3m_01215 | Scaffold       | t3m_contig_70_218_len_24774_read_count_2256939.27      |          |
| 2572232859 | t3m_01215 | Coordinates    | 3306..3860(-)                                          |          |
| 2572232859 | t3m_01215 | DNA_length     | 555bp                                                  |          |
| 2572232859 | t3m_01215 | Protein_length | 184aa                                                  |          |
| 2572232859 | t3m_01215 | GC             |                                                        | 0.65     |
|            |           |                |                                                        |          |
| 2572232860 | t3m_01216 | COG_category   | [K] Transcription                                      |          |
| 2572232860 | t3m_01216 | COG0640        | Predicted transcriptional regulators                   | 2.00E-13 |
| 2572232860 | t3m_01216 | pfam01022      | HTH_5                                                  | 1.00E-12 |
| 2572232860 | t3m_01216 | Locus_type     | CDS                                                    |          |
| 2572232860 | t3m_01216 | Product_name   | Predicted transcriptional regulators                   |          |
| 2572232860 | t3m_01216 | Scaffold       | t3m_contig_70_218_len_24774_read_count_2256939.27      |          |
| 2572232860 | t3m_01216 | Coordinates    | 4127..4513(-)                                          |          |
| 2572232860 | t3m_01216 | DNA_length     | 387bp                                                  |          |
| 2572232860 | t3m_01216 | Protein_length | 128aa                                                  |          |
| 2572232860 | t3m_01216 | GC             |                                                        | 0.65     |
|            |           |                |                                                        |          |
| 2572232861 | t3m_01217 | COG_category   | [C] Energy production and conversion                   |          |
| 2572232861 | t3m_01217 | COG4658        | Predicted NADH:ubiquinone oxidoreductase, subunit RnfD | 9.00E-09 |
| 2572232861 | t3m_01217 | pfam03116      | NQR2_RnfD_RnfE                                         | 6.30E-07 |
| 2572232861 | t3m_01217 | Locus_type     | CDS                                                    |          |
| 2572232861 | t3m_01217 | Product_name   | Predicted NADH:ubiquinone oxidoreductase, subunit RnfD |          |
| 2572232861 | t3m_01217 | Scaffold       | t3m_contig_70_218_len_24774_read_count_2256939.27      |          |
| 2572232861 | t3m_01217 | Coordinates    | 4629..5891(-)                                          |          |

|            |           |                |                                                   |          |
|------------|-----------|----------------|---------------------------------------------------|----------|
| 2572232861 | t3m_01217 | DNA_length     | 1263bp                                            |          |
| 2572232861 | t3m_01217 | Protein_length | 420aa                                             |          |
| 2572232861 | t3m_01217 | GC             |                                                   | 0.67     |
| 2572232861 | t3m_01217 | Transmembrane  | Yes                                               |          |
| 2572232862 | t3m_01218 | COG_category   | [S] Function unknown                              |          |
| 2572232862 | t3m_01218 | COG0586        | Uncharacterized membrane-associated protein       | 5.00E-24 |
| 2572232862 | t3m_01218 | pfam09335      | SNARE_assoc                                       | 8.40E-19 |
| 2572232862 | t3m_01218 | Locus_type     | CDS                                               |          |
| 2572232862 | t3m_01218 | Product_name   | Uncharacterized membrane-associated protein       |          |
| 2572232862 | t3m_01218 | Scaffold       | t3m_contig_70_218_len_24774_read_count_2256939.27 |          |
| 2572232862 | t3m_01218 | Coordinates    | 6144..6836(-)                                     |          |
| 2572232862 | t3m_01218 | DNA_length     | 693bp                                             |          |
| 2572232862 | t3m_01218 | Protein_length | 230aa                                             |          |
| 2572232862 | t3m_01218 | GC             |                                                   | 0.64     |
| 2572232862 | t3m_01218 | Transmembrane  | Yes                                               |          |
| 2572232863 | t3m_01219 | Locus_type     | CDS                                               |          |
| 2572232863 | t3m_01219 | Product_name   | hypothetical protein                              |          |
| 2572232863 | t3m_01219 | Scaffold       | t3m_contig_70_218_len_24774_read_count_2256939.27 |          |
| 2572232863 | t3m_01219 | Coordinates    | 7240..7671(+)                                     |          |
| 2572232863 | t3m_01219 | DNA_length     | 432bp                                             |          |
| 2572232863 | t3m_01219 | Protein_length | 143aa                                             |          |
| 2572232863 | t3m_01219 | GC             |                                                   | 0.65     |
| 2572232864 | t3m_01220 | Locus_type     | CDS                                               |          |
| 2572232864 | t3m_01220 | Product_name   | hypothetical protein                              |          |
| 2572232864 | t3m_01220 | Scaffold       | t3m_contig_70_218_len_24774_read_count_2256939.27 |          |
| 2572232864 | t3m_01220 | Coordinates    | 7784..8140(+)                                     |          |
| 2572232864 | t3m_01220 | DNA_length     | 357bp                                             |          |
| 2572232864 | t3m_01220 | Protein_length | 118aa                                             |          |
| 2572232864 | t3m_01220 | GC             |                                                   | 0.64     |
| 2572232864 | t3m_01220 | Transmembrane  | Yes                                               |          |



|            |           |                |                                       |                                                   |          |
|------------|-----------|----------------|---------------------------------------|---------------------------------------------------|----------|
| 2572232865 | t3m_01221 | Locus_type     |                                       | CDS                                               |          |
| 2572232865 | t3m_01221 | Product_name   |                                       | hypothetical protein                              |          |
| 2572232865 | t3m_01221 | Scaffold       |                                       | t3m_contig_70_218_len_24774_read_count_2256939.27 |          |
| 2572232865 | t3m_01221 | Coordinates    |                                       | 8285..8467(-)                                     |          |
| 2572232865 | t3m_01221 | DNA_length     |                                       | 183bp                                             |          |
| 2572232865 | t3m_01221 | Protein_length |                                       | 60aa                                              |          |
| 2572232865 | t3m_01221 | GC             |                                       |                                                   | 0.64     |
| 2572232866 | t3m_01222 | pfam07088      | GvpD                                  |                                                   | 8.60E-09 |
| 2572232866 | t3m_01222 | Locus_type     |                                       | CDS                                               |          |
| 2572232866 | t3m_01222 | Product_name   |                                       | GvpD gas vesicle protein                          |          |
| 2572232866 | t3m_01222 | Scaffold       |                                       | t3m_contig_70_218_len_24774_read_count_2256939.27 |          |
| 2572232866 | t3m_01222 | Coordinates    |                                       | 8480..9268(-)                                     |          |
| 2572232866 | t3m_01222 | DNA_length     |                                       | 789bp                                             |          |
| 2572232866 | t3m_01222 | Protein_length |                                       | 262aa                                             |          |
| 2572232866 | t3m_01222 | GC             |                                       |                                                   | 0.65     |
| 2572232867 | t3m_01223 | COG_category   | [S] Function unknown                  |                                                   |          |
| 2572232867 | t3m_01223 | COG2210        | Uncharacterized conserved protein     |                                                   | 2.00E-27 |
| 2572232867 | t3m_01223 | pfam13686      | DrsE_2                                |                                                   | 4.30E-50 |
| 2572232867 | t3m_01223 | Locus_type     |                                       | CDS                                               |          |
| 2572232867 | t3m_01223 | Product_name   |                                       | Uncharacterized conserved protein                 |          |
| 2572232867 | t3m_01223 | Scaffold       |                                       | t3m_contig_70_218_len_24774_read_count_2256939.27 |          |
| 2572232867 | t3m_01223 | Coordinates    |                                       | 9727..10188(+)                                    |          |
| 2572232867 | t3m_01223 | DNA_length     |                                       | 462bp                                             |          |
| 2572232867 | t3m_01223 | Protein_length |                                       | 153aa                                             |          |
| 2572232867 | t3m_01223 | GC             |                                       |                                                   | 0.62     |
| 2572232867 | t3m_01223 | Transmembrane  |                                       | Yes                                               |          |
| 2572232868 | t3m_01224 | COG_category   | [K] Transcription                     |                                                   |          |
| 2572232868 | t3m_01224 | COG0640        | Predicted transcriptional regulators  |                                                   | 1.00E-07 |
| 2572232868 | t3m_01224 | pfam12840      | HTH_20                                |                                                   | 6.70E-13 |
| 2572232868 | t3m_01224 | KO:K03892      | ArsR family transcriptional regulator |                                                   | 4.70E-13 |
| 2572232868 | t3m_01224 | Locus_type     |                                       | CDS                                               |          |

|            |           |                |                                                                    |          |
|------------|-----------|----------------|--------------------------------------------------------------------|----------|
| 2572232868 | t3m_01224 | Product_name   | Predicted transcriptional regulators                               |          |
| 2572232868 | t3m_01224 | Scaffold       | t3m_contig_70_218_len_24774_read_count_2256939.27                  |          |
| 2572232868 | t3m_01224 | Coordinates    | 10204..10632(+)                                                    |          |
| 2572232868 | t3m_01224 | DNA_length     | 429bp                                                              |          |
| 2572232868 | t3m_01224 | Protein_length | 142aa                                                              |          |
| 2572232868 | t3m_01224 | GC             |                                                                    | 0.67     |
|            |           |                |                                                                    |          |
| 2572232869 | t3m_01225 | COG_category   | [O] Posttranslational modification, protein turnover, chaperones   |          |
| 2572232869 | t3m_01225 | COG0425        | Predicted redox protein, regulator of disulfide bond formation     | 3.00E-13 |
| 2572232869 | t3m_01225 | pfam01206      | TusA                                                               | 3.40E-18 |
| 2572232869 | t3m_01225 | Locus_type     | CDS                                                                |          |
| 2572232869 | t3m_01225 | Product_name   | Predicted redox protein, regulator of disulfide bond formation     |          |
| 2572232869 | t3m_01225 | Scaffold       | t3m_contig_70_218_len_24774_read_count_2256939.27                  |          |
| 2572232869 | t3m_01225 | Coordinates    | 10651..10905(+)                                                    |          |
| 2572232869 | t3m_01225 | DNA_length     | 255bp                                                              |          |
| 2572232869 | t3m_01225 | Protein_length | 84aa                                                               |          |
| 2572232869 | t3m_01225 | GC             |                                                                    | 0.63     |
|            |           |                |                                                                    |          |
| 2572232870 | t3m_01226 | COG_category   | [C] Energy production and conversion                               |          |
| 2572232870 | t3m_01226 | COG1908        | Coenzyme F420-reducing hydrogenase, delta subunit                  | 5.00E-15 |
| 2572232870 | t3m_01226 | pfam02662      | FlpD                                                               | 4.80E-23 |
| 2572232870 | t3m_01226 | Locus_type     | CDS                                                                |          |
| 2572232870 | t3m_01226 | Product_name   | Coenzyme F420-reducing hydrogenase, delta subunit                  |          |
| 2572232870 | t3m_01226 | Scaffold       | t3m_contig_70_218_len_24774_read_count_2256939.27                  |          |
| 2572232870 | t3m_01226 | Coordinates    | 10956..11339(+)                                                    |          |
| 2572232870 | t3m_01226 | DNA_length     | 384bp                                                              |          |
| 2572232870 | t3m_01226 | Protein_length | 127aa                                                              |          |
| 2572232870 | t3m_01226 | GC             |                                                                    | 0.67     |
|            |           |                |                                                                    |          |
| 2572232871 | t3m_01227 | COG_category   | [E] Amino acid transport and metabolism                            |          |
| 2572232871 | t3m_01227 | COG_category   | [R] General function prediction only                               |          |
| 2572232871 | t3m_01227 | COG0493        | NADPH-dependent glutamate synthase beta chain and related oxidorec | 2.00E-71 |
| 2572232871 | t3m_01227 | pfam07992      | Pyr_redox_2                                                        | 9.90E-19 |
| 2572232871 | t3m_01227 | pfam07992      | Pyr_redox_2                                                        | 1.00E-05 |

|            |           |                |                                                   |                                                                          |          |
|------------|-----------|----------------|---------------------------------------------------|--------------------------------------------------------------------------|----------|
| 2572232871 | t3m_01227 | pfam14691      | Fer4_20                                           |                                                                          | 8.50E-11 |
| 2572232871 | t3m_01227 | Locus_type     |                                                   | CDS                                                                      |          |
| 2572232871 | t3m_01227 | Product_name   |                                                   | NADPH-dependent glutamate synthase beta chain and related oxidoreductase |          |
| 2572232871 | t3m_01227 | Scaffold       |                                                   | t3m_contig_70_218_len_24774_read_count_2256939.27                        |          |
| 2572232871 | t3m_01227 | Coordinates    |                                                   | 11340..14072(+)                                                          |          |
| 2572232871 | t3m_01227 | DNA_length     |                                                   | 2733bp                                                                   |          |
| 2572232871 | t3m_01227 | Protein_length |                                                   | 910aa                                                                    |          |
| 2572232871 | t3m_01227 | GC             |                                                   |                                                                          | 0.67     |
| 2572232872 | t3m_01228 | KEGG_module    | M00357: Methanogenesis, acetate => methane        |                                                                          |          |
| 2572232872 | t3m_01228 | KEGG_module    | M00562: Methanogenesis, dimethylamine => methane  |                                                                          |          |
| 2572232872 | t3m_01228 | KEGG_module    | M00356: Methanogenesis, methanol => methane       |                                                                          |          |
| 2572232872 | t3m_01228 | KEGG_module    | M00561: Methanogenesis, trimethylamine => methane |                                                                          |          |
| 2572232872 | t3m_01228 | KEGG_module    | M00567: Methanogenesis, CO2 => methane            |                                                                          |          |
| 2572232872 | t3m_01228 | KEGG_module    | M00563: Methanogenesis, methylamine => methane    |                                                                          |          |
| 2572232872 | t3m_01228 | KEGG_module    | M00347: Methanogenesis, formate => methane        |                                                                          |          |
| 2572232872 | t3m_01228 | Metacyc        | PWY-5207: coenzyme B/coenzyme M regeneration      |                                                                          |          |
| 2572232872 | t3m_01228 | pfam13450      | NAD_binding_8                                     |                                                                          | 7.80E-09 |
| 2572232872 | t3m_01228 | EC:1.8.98.1    | CoB--CoM heterodisulfide reductase.               |                                                                          |          |
| 2572232872 | t3m_01228 | KO:K03388      | heterodisulfide reductase subunit A [EC:1.8.98.1] |                                                                          | 0.00E+00 |
| 2572232872 | t3m_01228 | Locus_type     |                                                   | CDS                                                                      |          |
| 2572232872 | t3m_01228 | Product_name   |                                                   | NAD(P)-binding Rossmann-like domain                                      |          |
| 2572232872 | t3m_01228 | Scaffold       |                                                   | t3m_contig_70_218_len_24774_read_count_2256939.27                        |          |
| 2572232872 | t3m_01228 | Coordinates    |                                                   | 14069..15802(+)                                                          |          |
| 2572232872 | t3m_01228 | DNA_length     |                                                   | 1734bp                                                                   |          |
| 2572232872 | t3m_01228 | Protein_length |                                                   | 577aa                                                                    |          |
| 2572232872 | t3m_01228 | GC             |                                                   |                                                                          | 0.66     |
| 2572232873 | t3m_01229 | Locus_type     |                                                   | CDS                                                                      |          |
| 2572232873 | t3m_01229 | Product_name   |                                                   | hypothetical protein                                                     |          |
| 2572232873 | t3m_01229 | Scaffold       |                                                   | t3m_contig_70_218_len_24774_read_count_2256939.27                        |          |
| 2572232873 | t3m_01229 | Coordinates    |                                                   | 15799..16050(+)                                                          |          |
| 2572232873 | t3m_01229 | DNA_length     |                                                   | 252bp                                                                    |          |
| 2572232873 | t3m_01229 | Protein_length |                                                   | 83aa                                                                     |          |

|            |           |                |                                              |                                                   |          |
|------------|-----------|----------------|----------------------------------------------|---------------------------------------------------|----------|
| 2572232873 | t3m_01229 | GC             |                                              |                                                   | 0.69     |
| 2572232874 | t3m_01230 | pfam13183      | Fer4_8                                       |                                                   | 2.20E-10 |
| 2572232874 | t3m_01230 | Locus_type     |                                              | CDS                                               |          |
| 2572232874 | t3m_01230 | Product_name   |                                              | 4Fe-4S dicluster domain                           |          |
| 2572232874 | t3m_01230 | Scaffold       |                                              | t3m_contig_70_218_len_24774_read_count_2256939.27 |          |
| 2572232874 | t3m_01230 | Coordinates    |                                              | 16047..16355(+)                                   |          |
| 2572232874 | t3m_01230 | DNA_length     |                                              | 309bp                                             |          |
| 2572232874 | t3m_01230 | Protein_length |                                              | 102aa                                             |          |
| 2572232874 | t3m_01230 | GC             |                                              |                                                   | 0.66     |
| 2572232875 | t3m_01231 | COG_category   | [C] Energy production and conversion         |                                                   |          |
| 2572232875 | t3m_01231 | COG0247        | Fe-S oxidoreductase                          |                                                   | 1.00E-27 |
| 2572232875 | t3m_01231 | pfam02754      | CCG                                          |                                                   | 3.10E-07 |
| 2572232875 | t3m_01231 | Locus_type     |                                              | CDS                                               |          |
| 2572232875 | t3m_01231 | Product_name   |                                              | Fe-S oxidoreductase                               |          |
| 2572232875 | t3m_01231 | Scaffold       |                                              | t3m_contig_70_218_len_24774_read_count_2256939.27 |          |
| 2572232875 | t3m_01231 | Coordinates    |                                              | 16369..17340(+)                                   |          |
| 2572232875 | t3m_01231 | DNA_length     |                                              | 972bp                                             |          |
| 2572232875 | t3m_01231 | Protein_length |                                              | 323aa                                             |          |
| 2572232875 | t3m_01231 | GC             |                                              |                                                   | 0.67     |
| 2572232876 | t3m_01232 | COG_category   | [C] Energy production and conversion         |                                                   |          |
| 2572232876 | t3m_01232 | COG2086        | Electron transfer flavoprotein, beta subunit |                                                   | 8.00E-53 |
| 2572232876 | t3m_01232 | pfam01012      | ETF                                          |                                                   | 1.90E-39 |
| 2572232876 | t3m_01232 | KO:K03521      | electron transfer flavoprotein beta subunit  |                                                   | 0.00E+00 |
| 2572232876 | t3m_01232 | ITERM:01639    | electron transfer flavoprotein beta subunit  |                                                   |          |
| 2572232876 | t3m_01232 | Locus_type     |                                              | CDS                                               |          |
| 2572232876 | t3m_01232 | Product_name   |                                              | electron transfer flavoprotein beta subunit       |          |
| 2572232876 | t3m_01232 | Scaffold       |                                              | t3m_contig_70_218_len_24774_read_count_2256939.27 |          |
| 2572232876 | t3m_01232 | Coordinates    |                                              | 17427..18221(-)                                   |          |
| 2572232876 | t3m_01232 | DNA_length     |                                              | 795bp                                             |          |
| 2572232876 | t3m_01232 | Protein_length |                                              | 264aa                                             |          |
| 2572232876 | t3m_01232 | GC             |                                              |                                                   | 0.69     |

|            |           |                |                                                         |          |
|------------|-----------|----------------|---------------------------------------------------------|----------|
| 2572232877 | t3m_01233 | COG_category   | [C] Energy production and conversion                    |          |
| 2572232877 | t3m_01233 | COG0205        | Electron transfer flavoprotein, alpha subunit           | 3.00E-73 |
| 2572232877 | t3m_01233 | pfam00766      | ETF_alpha                                               | 1.90E-24 |
| 2572232877 | t3m_01233 | pfam01012      | ETF                                                     | 4.30E-35 |
| 2572232877 | t3m_01233 | KO:K03522      | electron transfer flavoprotein alpha subunit            | 0.00E+00 |
| 2572232877 | t3m_01233 | ITERM:01638    | electron transfer flavoprotein alpha subunit apoprotein |          |
| 2572232877 | t3m_01233 | Locus_type     | CDS                                                     |          |
| 2572232877 | t3m_01233 | Product_name   | electron transfer flavoprotein alpha subunit apoprotein |          |
| 2572232877 | t3m_01233 | Scaffold       | t3m_contig_70_218_len_24774_read_count_2256939.27       |          |
| 2572232877 | t3m_01233 | Coordinates    | 18224..19204(-)                                         |          |
| 2572232877 | t3m_01233 | DNA_length     | 981bp                                                   |          |
| 2572232877 | t3m_01233 | Protein_length | 326aa                                                   |          |
| 2572232877 | t3m_01233 | GC             |                                                         | 0.71     |
|            |           |                |                                                         |          |
| 2572232878 | t3m_01234 | COG_category   | [C] Energy production and conversion                    |          |
| 2572232878 | t3m_01234 | COG0247        | Fe-S oxidoreductase                                     | 4.00E-51 |
| 2572232878 | t3m_01234 | pfam02754      | CCG                                                     | 8.30E-16 |
| 2572232878 | t3m_01234 | pfam13183      | Fer4_8                                                  | 8.20E-10 |
| 2572232878 | t3m_01234 | pfam02754      | CCG                                                     | 7.10E-13 |
| 2572232878 | t3m_01234 | Locus_type     | CDS                                                     |          |
| 2572232878 | t3m_01234 | Product_name   | Fe-S oxidoreductase                                     |          |
| 2572232878 | t3m_01234 | Scaffold       | t3m_contig_70_218_len_24774_read_count_2256939.27       |          |
| 2572232878 | t3m_01234 | Coordinates    | 19209..20333(-)                                         |          |
| 2572232878 | t3m_01234 | DNA_length     | 1125bp                                                  |          |
| 2572232878 | t3m_01234 | Protein_length | 374aa                                                   |          |
| 2572232878 | t3m_01234 | GC             |                                                         | 0.7      |
|            |           |                |                                                         |          |
| 2572232879 | t3m_01235 | KEGG_module    | M00561: Methanogenesis, trimethylamine => methane       |          |
| 2572232879 | t3m_01235 | KEGG_module    | M00563: Methanogenesis, methylamine => methane          |          |
| 2572232879 | t3m_01235 | KEGG_module    | M00347: Methanogenesis, formate => methane              |          |
| 2572232879 | t3m_01235 | KEGG_module    | M00357: Methanogenesis, acetate => methane              |          |
| 2572232879 | t3m_01235 | KEGG_module    | M00356: Methanogenesis, methanol => methane             |          |
| 2572232879 | t3m_01235 | KEGG_module    | M00567: Methanogenesis, CO2 => methane                  |          |

|            |           |                |                                                                                |           |
|------------|-----------|----------------|--------------------------------------------------------------------------------|-----------|
| 2572232879 | t3m_01235 | KEGG_module    | M00562: Methanogenesis, dimethylamine => methane                               |           |
| 2572232879 | t3m_01235 | Metacyc        | PWY-5207: coenzyme B/coenzyme M regeneration                                   |           |
| 2572232879 | t3m_01235 | COG_category   | [C] Energy production and conversion                                           |           |
| 2572232879 | t3m_01235 | COG1148        | Heterodisulfide reductase, subunit A and related polyferredoxins               | 3.00E-109 |
| 2572232879 | t3m_01235 | pfam00037      | Fer4                                                                           | 7.80E-09  |
| 2572232879 | t3m_01235 | pfam07992      | Pyr_redox_2                                                                    | 1.30E-10  |
| 2572232879 | t3m_01235 | pfam07992      | Pyr_redox_2                                                                    | 1.40E-08  |
| 2572232879 | t3m_01235 | pfam02662      | FlpD                                                                           | 4.90E-42  |
| 2572232879 | t3m_01235 | pfam00070      | Pyr_redox                                                                      | 2.20E-05  |
| 2572232879 | t3m_01235 | EC:1.8.98.1    | CoB--CoM heterodisulfide reductase.                                            |           |
| 2572232879 | t3m_01235 | KO:K03388      | heterodisulfide reductase subunit A [EC:1.8.98.1]                              | 0.00E+00  |
| 2572232879 | t3m_01235 | Locus_type     | CDS                                                                            |           |
| 2572232879 | t3m_01235 | Product_name   | Pyridine nucleotide-disulphide oxidoreductase/Methyl-viologen-reducin          |           |
| 2572232879 | t3m_01235 | Scaffold       | t3m_contig_70_218_len_24774_read_count_2256939.27                              |           |
| 2572232879 | t3m_01235 | Coordinates    | 20344..23748(-)                                                                |           |
| 2572232879 | t3m_01235 | DNA_length     | 3405bp                                                                         |           |
| 2572232879 | t3m_01235 | Protein_length | 1134aa                                                                         |           |
| 2572232879 | t3m_01235 | GC             |                                                                                | 0.67      |
| 2572232879 | t3m_01235 | Fused_gene     | Yes                                                                            |           |
| 2572232880 | t3m_01236 | KEGG_module    | M00011: Citrate cycle, second carbon oxidation, 2-oxoglutarate => oxaloacetate |           |
| 2572232880 | t3m_01236 | KEGG_module    | M00311: 2-oxoglutarate:ferredoxin oxidoreductase                               |           |
| 2572232880 | t3m_01236 | Metacyc        | REDCITCYC: TCA cycle III (helicobacter)                                        |           |
| 2572232880 | t3m_01236 | Metacyc        | P23-PWY: reductive TCA cycle I                                                 |           |
| 2572232880 | t3m_01236 | Metacyc        | P42-PWY: incomplete reductive TCA cycle                                        |           |
| 2572232880 | t3m_01236 | Metacyc        | PWY-6969: TCA cycle V (2-oxoglutarate:ferredoxin oxidoreductase)               |           |
| 2572232880 | t3m_01236 | Metacyc        | PWY-5392: reductive TCA cycle II                                               |           |
| 2572232880 | t3m_01236 | COG_category   | [C] Energy production and conversion                                           |           |
| 2572232880 | t3m_01236 | COG1014        | Pyruvate:ferredoxin oxidoreductase and related 2-oxoacid:ferredoxin o          | 2.00E-24  |
| 2572232880 | t3m_01236 | pfam01558      | POR                                                                            | 1.00E-30  |
| 2572232880 | t3m_01236 | EC:1.2.7.3     | 2-oxoglutarate synthase.                                                       |           |
| 2572232880 | t3m_01236 | KO:K00177      | 2-oxoglutarate ferredoxin oxidoreductase subunit gamma [EC:1.2.7.3]            | 5.60E-38  |
| 2572232880 | t3m_01236 | Locus_type     | CDS                                                                            |           |
| 2572232880 | t3m_01236 | Product_name   | Pyruvate:ferredoxin oxidoreductase and related 2-oxoacid:ferredoxin ox         |           |

|            |           |                |                                                            |                                                              |          |
|------------|-----------|----------------|------------------------------------------------------------|--------------------------------------------------------------|----------|
| 2572232880 | t3m_01236 | Scaffold       |                                                            | t3m_contig_70_218_len_24774_read_count_2256939.27            |          |
| 2572232880 | t3m_01236 | Coordinates    |                                                            | 23745..24266(-)                                              |          |
| 2572232880 | t3m_01236 | DNA_length     |                                                            | 522bp                                                        |          |
| 2572232880 | t3m_01236 | Protein_length |                                                            | 173aa                                                        |          |
| 2572232880 | t3m_01236 | GC             |                                                            |                                                              | 0.67     |
| 2572232880 | t3m_01236 | Transmembrane  |                                                            | Yes                                                          |          |
| 2572232881 | t3m_01237 | pfam02775      | TPP_enzyme_C                                               |                                                              | 3.70E-12 |
| 2572232881 | t3m_01237 | Locus_type     |                                                            | CDS                                                          |          |
| 2572232881 | t3m_01237 | Product_name   |                                                            | Thiamine pyrophosphate enzyme, C-terminal TPP binding domain |          |
| 2572232881 | t3m_01237 | Scaffold       |                                                            | t3m_contig_70_218_len_24774_read_count_2256939.27            |          |
| 2572232881 | t3m_01237 | Coordinates    |                                                            | 24263..24757(-)                                              |          |
| 2572232881 | t3m_01237 | DNA_length     |                                                            | 495bp                                                        |          |
| 2572232881 | t3m_01237 | Protein_length |                                                            | 164aa                                                        |          |
| 2572232881 | t3m_01237 | GC             |                                                            |                                                              | 0.64     |
| 2572232882 | t3m_01238 | COG_category   | [S] Function unknown                                       |                                                              |          |
| 2572232882 | t3m_01238 | COG1860        | Uncharacterized protein conserved in archaea               |                                                              | 9.00E-25 |
| 2572232882 | t3m_01238 | pfam03684      | UPF0179                                                    |                                                              | 7.50E-32 |
| 2572232882 | t3m_01238 | KO:K09730      | hypothetical protein                                       |                                                              | 1.20E-17 |
| 2572232882 | t3m_01238 | Locus_type     |                                                            | CDS                                                          |          |
| 2572232882 | t3m_01238 | Product_name   |                                                            | Uncharacterized protein conserved in archaea                 |          |
| 2572232882 | t3m_01238 | Scaffold       |                                                            | t3m_contig_70_225_len_24160_read_count_2040884.28            |          |
| 2572232882 | t3m_01238 | Coordinates    |                                                            | 129..557(-)                                                  |          |
| 2572232882 | t3m_01238 | DNA_length     |                                                            | 429bp                                                        |          |
| 2572232882 | t3m_01238 | Protein_length |                                                            | 142aa                                                        |          |
| 2572232882 | t3m_01238 | GC             |                                                            |                                                              | 0.69     |
| 2572232883 | t3m_01239 | Metacyc        | PWY-6349: CDP-archaeol biosynthesis                        |                                                              |          |
| 2572232883 | t3m_01239 | COG_category   | [C] Energy production and conversion                       |                                                              |          |
| 2572232883 | t3m_01239 | COG0371        | Glycerol dehydrogenase and related enzymes                 |                                                              | 6.00E-89 |
| 2572232883 | t3m_01239 | pfam13685      | Fe-ADH_2                                                   |                                                              | 8.40E-62 |
| 2572232883 | t3m_01239 | EC:1.1.1.261   | sn-glycerol-1-phosphate dehydrogenase.                     |                                                              |          |
| 2572232883 | t3m_01239 | KO:K00096      | glycerol-1-phosphate dehydrogenase [NAD(P)] [EC:1.1.1.261] |                                                              | 0.00E+00 |

|            |           |                |                                                                  |           |
|------------|-----------|----------------|------------------------------------------------------------------|-----------|
| 2572232883 | t3m_01239 | Locus_type     | CDS                                                              |           |
| 2572232883 | t3m_01239 | Product_name   | Glycerol dehydrogenase and related enzymes                       |           |
| 2572232883 | t3m_01239 | Scaffold       | t3m_contig_70_225_len_24160_read_count_2040884.28                |           |
| 2572232883 | t3m_01239 | Coordinates    | 559..1668(-)                                                     |           |
| 2572232883 | t3m_01239 | DNA_length     | 1110bp                                                           |           |
| 2572232883 | t3m_01239 | Protein_length | 369aa                                                            |           |
| 2572232883 | t3m_01239 | GC             |                                                                  | 0.67      |
| 2572232884 | t3m_01240 | Metacyc        | PWY-6703: preQ<sub>0</sub> biosynthesis                          |           |
| 2572232884 | t3m_01240 | COG_category   | [O] Posttranslational modification, protein turnover, chaperones |           |
| 2572232884 | t3m_01240 | COG0602        | Organic radical activating enzymes                               | 3.00E-35  |
| 2572232884 | t3m_01240 | pfam13394      | Fer4_14                                                          | 9.20E-16  |
| 2572232884 | t3m_01240 | pfam04055      | Radical_SAM                                                      | 1.40E-17  |
| 2572232884 | t3m_01240 | EC:4.3.99.3    | 7-carboxy-7-deazaguanine synthase.                               |           |
| 2572232884 | t3m_01240 | TIGR03365      | 7-cyano-7-deazaguanosine (preQ0) biosynthesis protein QueE       | 4.80E-33  |
| 2572232884 | t3m_01240 | KO:K10026      | 7-carboxy-7-deazaguanine synthase [EC:4.3.99.3]                  | 0.00E+00  |
| 2572232884 | t3m_01240 | Locus_type     | CDS                                                              |           |
| 2572232884 | t3m_01240 | Product_name   | Organic radical activating enzymes                               |           |
| 2572232884 | t3m_01240 | Scaffold       | t3m_contig_70_225_len_24160_read_count_2040884.28                |           |
| 2572232884 | t3m_01240 | Coordinates    | 1736..2365(-)                                                    |           |
| 2572232884 | t3m_01240 | DNA_length     | 630bp                                                            |           |
| 2572232884 | t3m_01240 | Protein_length | 209aa                                                            |           |
| 2572232884 | t3m_01240 | GC             |                                                                  | 0.68      |
| 2572232885 | t3m_01241 | KEGG_module    | M00359: Aminoacyl-tRNA biosynthesis, eukaryotes                  |           |
| 2572232885 | t3m_01241 | KEGG_module    | M00360: Aminoacyl-tRNA biosynthesis, prokaryotes                 |           |
| 2572232885 | t3m_01241 | Metacyc        | TRNA-CHARGING-PWY: tRNA charging                                 |           |
| 2572232885 | t3m_01241 | IMG_pathway    | 495: L-leucine ligation to tRNA(Leu)                             |           |
| 2572232885 | t3m_01241 | COG_category   | [J] Translation, ribosomal structure and biogenesis              |           |
| 2572232885 | t3m_01241 | COG0495        | Leucyl-tRNA synthetase                                           | 2.00E-109 |
| 2572232885 | t3m_01241 | pfam00133      | tRNA-synt_1                                                      | 3.80E-20  |
| 2572232885 | t3m_01241 | EC:6.1.1.4     | Leucine--tRNA ligase.                                            |           |
| 2572232885 | t3m_01241 | TIGR00395      | leucyl-tRNA synthetase, archaeal and cytosolic family            | 0.00E+00  |
| 2572232885 | t3m_01241 | KO:K01869      | leucyl-tRNA synthetase [EC:6.1.1.4]                              | 0.00E+00  |



|            |           |                |                                                                                                 |          |
|------------|-----------|----------------|-------------------------------------------------------------------------------------------------|----------|
| 2572232885 | t3m_01241 | ITERM:00405    | leucyl-tRNA synthetase (EC 6.1.1.4)                                                             |          |
| 2572232885 | t3m_01241 | Locus_type     | CDS                                                                                             |          |
| 2572232885 | t3m_01241 | Product_name   | leucyl-tRNA synthetase (EC 6.1.1.4)                                                             |          |
| 2572232885 | t3m_01241 | Scaffold       | t3m_contig_70_225_len_24160_read_count_2040884.28                                               |          |
| 2572232885 | t3m_01241 | Coordinates    | 2470..5355(+)                                                                                   |          |
| 2572232885 | t3m_01241 | DNA_length     | 2886bp                                                                                          |          |
| 2572232885 | t3m_01241 | Protein_length | 961aa                                                                                           |          |
| 2572232885 | t3m_01241 | GC             |                                                                                                 | 0.7      |
| 2572232886 | t3m_01242 | COG_category   | [J] Translation, ribosomal structure and biogenesis                                             |          |
| 2572232886 | t3m_01242 | COG1670        | Acetyltransferases, including N-acetylases of ribosomal proteins                                | 1.00E-23 |
| 2572232886 | t3m_01242 | pfam13302      | Acetyltransf_3                                                                                  | 8.10E-29 |
| 2572232886 | t3m_01242 | Locus_type     | CDS                                                                                             |          |
| 2572232886 | t3m_01242 | Product_name   | Acetyltransferases, including N-acetylases of ribosomal proteins                                |          |
| 2572232886 | t3m_01242 | Scaffold       | t3m_contig_70_225_len_24160_read_count_2040884.28                                               |          |
| 2572232886 | t3m_01242 | Coordinates    | 5383..5973(-)                                                                                   |          |
| 2572232886 | t3m_01242 | DNA_length     | 591bp                                                                                           |          |
| 2572232886 | t3m_01242 | Protein_length | 196aa                                                                                           |          |
| 2572232886 | t3m_01242 | GC             |                                                                                                 | 0.72     |
| 2572232887 | t3m_01243 | KEGG_module    | M00053: Pyrimidine deoxyribonucleotide biosynthesis, CDP/CTP => dCDP/dCTP,dTDP/dTTP             |          |
| 2572232887 | t3m_01243 | Metacyc        | PWY-7187: pyrimidine deoxyribonucleotides <i>de novo</i> biosynthesis II                        |          |
| 2572232887 | t3m_01243 | Metacyc        | PWY0-166: superpathway of pyrimidine deoxyribonucleotides <i>de novo</i> biosynthesis (E. coli) |          |
| 2572232887 | t3m_01243 | COG_category   | [F] Nucleotide transport and metabolism                                                         |          |
| 2572232887 | t3m_01243 | COG0717        | Deoxycytidine deaminase                                                                         | 1.00E-27 |
| 2572232887 | t3m_01243 | EC:3.5.4.13    | dCTP deaminase.                                                                                 |          |
| 2572232887 | t3m_01243 | TIGR02274      | deoxycytidine triphosphate deaminase                                                            | 1.50E-33 |
| 2572232887 | t3m_01243 | KO:K01494      | dCTP deaminase [EC:3.5.4.13]                                                                    | 0.00E+00 |
| 2572232887 | t3m_01243 | Locus_type     | CDS                                                                                             |          |
| 2572232887 | t3m_01243 | Product_name   | dCTP deaminase (EC 3.5.4.13)                                                                    |          |
| 2572232887 | t3m_01243 | Scaffold       | t3m_contig_70_225_len_24160_read_count_2040884.28                                               |          |
| 2572232887 | t3m_01243 | Coordinates    | 5978..6544(-)                                                                                   |          |
| 2572232887 | t3m_01243 | DNA_length     | 567bp                                                                                           |          |
| 2572232887 | t3m_01243 | Protein_length | 188aa                                                                                           |          |

|            |           |                |                                                                       |          |
|------------|-----------|----------------|-----------------------------------------------------------------------|----------|
| 2572232887 | t3m_01243 | GC             |                                                                       | 0.65     |
| 2572232888 | t3m_01244 | COG_category   | [R] General function prediction only                                  |          |
| 2572232888 | t3m_01244 | COG1355        | Predicted dioxygenase                                                 | 2.00E-66 |
| 2572232888 | t3m_01244 | pfam01875      | Memo                                                                  | 1.50E-63 |
| 2572232888 | t3m_01244 | TIGR04336      | AmmeMemoRadiSam system protein B                                      | 1.10E-81 |
| 2572232888 | t3m_01244 | Locus_type     | CDS                                                                   |          |
| 2572232888 | t3m_01244 | Product_name   | AmmeMemoRadiSam system protein B                                      |          |
| 2572232888 | t3m_01244 | Scaffold       | t3m_contig_70_225_len_24160_read_count_2040884.28                     |          |
| 2572232888 | t3m_01244 | Coordinates    | 6574..7410(-)                                                         |          |
| 2572232888 | t3m_01244 | DNA_length     | 837bp                                                                 |          |
| 2572232888 | t3m_01244 | Protein_length | 278aa                                                                 |          |
| 2572232888 | t3m_01244 | GC             |                                                                       | 0.68     |
| 2572232889 | t3m_01245 | COG_category   | [F] Nucleotide transport and metabolism                               |          |
| 2572232889 | t3m_01245 | COG_category   | [G] Carbohydrate transport and metabolism                             |          |
| 2572232889 | t3m_01245 | COG_category   | [R] General function prediction only                                  |          |
| 2572232889 | t3m_01245 | COG0537        | Diadenosine tetraphosphate (Ap4A) hydrolase and other HIT family hyd  | 2.00E-29 |
| 2572232889 | t3m_01245 | pfam01230      | HIT                                                                   | 1.20E-24 |
| 2572232889 | t3m_01245 | KO:K02503      | Hit-like protein involved in cell-cycle regulation                    | 3.10E-26 |
| 2572232889 | t3m_01245 | Locus_type     | CDS                                                                   |          |
| 2572232889 | t3m_01245 | Product_name   | Diadenosine tetraphosphate (Ap4A) hydrolase and other HIT family hydr |          |
| 2572232889 | t3m_01245 | Scaffold       | t3m_contig_70_225_len_24160_read_count_2040884.28                     |          |
| 2572232889 | t3m_01245 | Coordinates    | 7444..7869(-)                                                         |          |
| 2572232889 | t3m_01245 | DNA_length     | 426bp                                                                 |          |
| 2572232889 | t3m_01245 | Protein_length | 141aa                                                                 |          |
| 2572232889 | t3m_01245 | GC             |                                                                       | 0.67     |
| 2572232890 | t3m_01246 | pfam00082      | Peptidase_S8                                                          | 2.00E-07 |
| 2572232890 | t3m_01246 | pfam09286      | Pro-kuma_activ                                                        | 7.90E-20 |
| 2572232890 | t3m_01246 | Locus_type     | CDS                                                                   |          |
| 2572232890 | t3m_01246 | Product_name   | Pro-kumamolisin, activation domain/Subtilase family                   |          |
| 2572232890 | t3m_01246 | Scaffold       | t3m_contig_70_225_len_24160_read_count_2040884.28                     |          |
| 2572232890 | t3m_01246 | Coordinates    | 7958..10309(+)                                                        |          |

|            |           |                |                                                                |          |
|------------|-----------|----------------|----------------------------------------------------------------|----------|
| 2572232890 | t3m_01246 | DNA_length     | 2352bp                                                         |          |
| 2572232890 | t3m_01246 | Protein_length | 783aa                                                          |          |
| 2572232890 | t3m_01246 | GC             |                                                                | 0.68     |
| 2572232890 | t3m_01246 | Signal_peptide | Yes                                                            |          |
| 2572232890 | t3m_01246 | Transmembrane  | Yes                                                            |          |
| 2572232891 | t3m_01247 | COG_category   | [K] Transcription                                              |          |
| 2572232891 | t3m_01247 | COG1386        | Predicted transcriptional regulator containing the HTH domain  | 7.00E-19 |
| 2572232891 | t3m_01247 | pfam04079      | DUF387                                                         | 2.00E-29 |
| 2572232891 | t3m_01247 | TIGR00281      | segregation and condensation protein B                         | 1.00E-27 |
| 2572232891 | t3m_01247 | KO:K06024      | segregation and condensation protein B                         | 3.50E-29 |
| 2572232891 | t3m_01247 | Locus_type     | CDS                                                            |          |
| 2572232891 | t3m_01247 | Product_name   | Predicted transcriptional regulator containing the HTH domain  |          |
| 2572232891 | t3m_01247 | Scaffold       | t3m_contig_70_225_len_24160_read_count_2040884.28              |          |
| 2572232891 | t3m_01247 | Coordinates    | 10318..10980(-)                                                |          |
| 2572232891 | t3m_01247 | DNA_length     | 663bp                                                          |          |
| 2572232891 | t3m_01247 | Protein_length | 220aa                                                          |          |
| 2572232891 | t3m_01247 | GC             |                                                                | 0.7      |
| 2572232892 | t3m_01248 | COG_category   | [S] Function unknown                                           |          |
| 2572232892 | t3m_01248 | COG1354        | Uncharacterized conserved protein                              | 2.00E-13 |
| 2572232892 | t3m_01248 | pfam02616      | ScpA_ScpB                                                      | 5.50E-06 |
| 2572232892 | t3m_01248 | ITERM:00133    | condensin subunit ScpA                                         |          |
| 2572232892 | t3m_01248 | Locus_type     | CDS                                                            |          |
| 2572232892 | t3m_01248 | Product_name   | condensin subunit ScpA                                         |          |
| 2572232892 | t3m_01248 | Scaffold       | t3m_contig_70_225_len_24160_read_count_2040884.28              |          |
| 2572232892 | t3m_01248 | Coordinates    | 10990..11946(-)                                                |          |
| 2572232892 | t3m_01248 | DNA_length     | 957bp                                                          |          |
| 2572232892 | t3m_01248 | Protein_length | 318aa                                                          |          |
| 2572232892 | t3m_01248 | GC             |                                                                | 0.67     |
| 2572232893 | t3m_01249 | COG_category   | [D] Cell cycle control, cell division, chromosome partitioning |          |
| 2572232893 | t3m_01249 | COG1196        | Chromosome segregation ATPases                                 | 0.00E+00 |
| 2572232893 | t3m_01249 | pfam06470      | SMC_hinge                                                      | 1.80E-25 |

|            |           |                |                                                             |          |
|------------|-----------|----------------|-------------------------------------------------------------|----------|
| 2572232893 | t3m_01249 | pfam02463      | SMC_N                                                       | 4.50E-63 |
| 2572232893 | t3m_01249 | TIGR02169      | chromosome segregation protein SMC, primarily archaeal type | 0.00E+00 |
| 2572232893 | t3m_01249 | TIGR02168      | chromosome segregation protein SMC, common bacterial type   | 0.00E+00 |
| 2572232893 | t3m_01249 | KO:K03529      | chromosome segregation protein                              | 0.00E+00 |
| 2572232893 | t3m_01249 | ITERM:00131    | condensin subunit Smc                                       |          |
| 2572232893 | t3m_01249 | Locus_type     | CDS                                                         |          |
| 2572232893 | t3m_01249 | Product_name   | condensin subunit Smc                                       |          |
| 2572232893 | t3m_01249 | Scaffold       | t3m_contig_70_225_len_24160_read_count_2040884.28           |          |
| 2572232893 | t3m_01249 | Coordinates    | 11943..15569(-)                                             |          |
| 2572232893 | t3m_01249 | DNA_length     | 3627bp                                                      |          |
| 2572232893 | t3m_01249 | Protein_length | 1208aa                                                      |          |
| 2572232893 | t3m_01249 | GC             |                                                             | 0.67     |
| 2572232894 | t3m_01250 | Locus_type     | CDS                                                         |          |
| 2572232894 | t3m_01250 | Product_name   | hypothetical protein                                        |          |
| 2572232894 | t3m_01250 | Scaffold       | t3m_contig_70_225_len_24160_read_count_2040884.28           |          |
| 2572232894 | t3m_01250 | Coordinates    | 15864..16208(+)                                             |          |
| 2572232894 | t3m_01250 | DNA_length     | 345bp                                                       |          |
| 2572232894 | t3m_01250 | Protein_length | 114aa                                                       |          |
| 2572232894 | t3m_01250 | GC             |                                                             | 0.7      |
| 2572232895 | t3m_01251 | COG_category   | [G] Carbohydrate transport and metabolism                   |          |
| 2572232895 | t3m_01251 | COG2814        | Arabinose efflux permease                                   | 1.00E-08 |
| 2572232895 | t3m_01251 | pfam07690      | MFS_1                                                       | 2.50E-16 |
| 2572232895 | t3m_01251 | Locus_type     | CDS                                                         |          |
| 2572232895 | t3m_01251 | Product_name   | Arabinose efflux permease                                   |          |
| 2572232895 | t3m_01251 | Scaffold       | t3m_contig_70_225_len_24160_read_count_2040884.28           |          |
| 2572232895 | t3m_01251 | Coordinates    | 16246..17451(-)                                             |          |
| 2572232895 | t3m_01251 | DNA_length     | 1206bp                                                      |          |
| 2572232895 | t3m_01251 | Protein_length | 401aa                                                       |          |
| 2572232895 | t3m_01251 | GC             |                                                             | 0.65     |
| 2572232895 | t3m_01251 | Transmembrane  | Yes                                                         |          |
| 2572232896 | t3m_01252 | pfam00583      | Acetyltransf_1                                              | 1.80E-06 |

|            |           |                |                                                            |                                                   |          |
|------------|-----------|----------------|------------------------------------------------------------|---------------------------------------------------|----------|
| 2572232896 | t3m_01252 | pfam00583      | Acetyltransf_1                                             |                                                   | 8.80E-07 |
| 2572232896 | t3m_01252 | Locus_type     |                                                            | CDS                                               |          |
| 2572232896 | t3m_01252 | Product_name   |                                                            | Acetyltransferase (GNAT) family                   |          |
| 2572232896 | t3m_01252 | Scaffold       |                                                            | t3m_contig_70_225_len_24160_read_count_2040884.28 |          |
| 2572232896 | t3m_01252 | Coordinates    |                                                            | 17655..18662(+)                                   |          |
| 2572232896 | t3m_01252 | DNA_length     |                                                            | 1008bp                                            |          |
| 2572232896 | t3m_01252 | Protein_length |                                                            | 335aa                                             |          |
| 2572232896 | t3m_01252 | GC             |                                                            |                                                   | 0.66     |
| 2572232897 | t3m_01253 | COG_category   | [C] Energy production and conversion                       |                                                   |          |
| 2572232897 | t3m_01253 | COG0778        | Nitroreductase                                             |                                                   | 9.00E-20 |
| 2572232897 | t3m_01253 | pfam00881      | Nitroreductase                                             |                                                   | 6.40E-29 |
| 2572232897 | t3m_01253 | Locus_type     |                                                            | CDS                                               |          |
| 2572232897 | t3m_01253 | Product_name   |                                                            | Nitroreductase                                    |          |
| 2572232897 | t3m_01253 | Scaffold       |                                                            | t3m_contig_70_225_len_24160_read_count_2040884.28 |          |
| 2572232897 | t3m_01253 | Coordinates    |                                                            | 18825..19361(+)                                   |          |
| 2572232897 | t3m_01253 | DNA_length     |                                                            | 537bp                                             |          |
| 2572232897 | t3m_01253 | Protein_length |                                                            | 178aa                                             |          |
| 2572232897 | t3m_01253 | GC             |                                                            |                                                   | 0.66     |
| 2572232898 | t3m_01254 | IMG_pathway    | 622: dITP and XTP hydrolysis                               |                                                   |          |
| 2572232898 | t3m_01254 | COG_category   | [F] Nucleotide transport and metabolism                    |                                                   |          |
| 2572232898 | t3m_01254 | COG0127        | Xanthosine triphosphate pyrophosphatase                    |                                                   | 4.00E-42 |
| 2572232898 | t3m_01254 | pfam01725      | Ham1p_like                                                 |                                                   | 1.50E-42 |
| 2572232898 | t3m_01254 | EC:3.6.1.19    | Nucleoside-triphosphate diphosphatase.                     |                                                   |          |
| 2572232898 | t3m_01254 | TIGR00042      | non-canonical purine NTP pyrophosphatase, RdgB/HAM1 family |                                                   | 4.70E-45 |
| 2572232898 | t3m_01254 | KO:K02428      | dITP/XTP pyrophosphatase [EC:3.6.1.19]                     |                                                   | 2.10E-35 |
| 2572232898 | t3m_01254 | ITERM:05394    | dITPase (EC 3.6.1.-)                                       |                                                   |          |
| 2572232898 | t3m_01254 | Locus_type     |                                                            | CDS                                               |          |
| 2572232898 | t3m_01254 | Product_name   |                                                            | dITPase (EC 3.6.1.-)                              |          |
| 2572232898 | t3m_01254 | Scaffold       |                                                            | t3m_contig_70_225_len_24160_read_count_2040884.28 |          |
| 2572232898 | t3m_01254 | Coordinates    |                                                            | 19364..19918(+)                                   |          |
| 2572232898 | t3m_01254 | DNA_length     |                                                            | 555bp                                             |          |
| 2572232898 | t3m_01254 | Protein_length |                                                            | 184aa                                             |          |

|            |           |                |                                                                                             |          |
|------------|-----------|----------------|---------------------------------------------------------------------------------------------|----------|
| 2572232898 | t3m_01254 | GC             |                                                                                             | 0.68     |
| 2572232899 | t3m_01255 | COG_category   | [O] Posttranslational modification, protein turnover, chaperones                            |          |
| 2572232899 | t3m_01255 | COG0459        | Chaperonin GroEL (HSP60 family)                                                             | 0.00E+00 |
| 2572232899 | t3m_01255 | pfam00118      | Cpn60_TCP1                                                                                  | 0.00E+00 |
| 2572232899 | t3m_01255 | TIGR02339      | thermosome, various subunits, archaeal                                                      | 0.00E+00 |
| 2572232899 | t3m_01255 | Locus_type     | CDS                                                                                         |          |
| 2572232899 | t3m_01255 | Product_name   | thermosome subunit                                                                          |          |
| 2572232899 | t3m_01255 | Scaffold       | t3m_contig_70_225_len_24160_read_count_2040884.28                                           |          |
| 2572232899 | t3m_01255 | Coordinates    | 20030..21697(-)                                                                             |          |
| 2572232899 | t3m_01255 | DNA_length     | 1668bp                                                                                      |          |
| 2572232899 | t3m_01255 | Protein_length | 555aa                                                                                       |          |
| 2572232899 | t3m_01255 | GC             |                                                                                             | 0.66     |
| 2572232900 | t3m_01256 | COG_category   | [G] Carbohydrate transport and metabolism                                                   |          |
| 2572232900 | t3m_01256 | COG2211        | Na <sup>+</sup> /melibiose symporter and related transporters                               | 8.00E-08 |
| 2572232900 | t3m_01256 | pfam05977      | MFS_3                                                                                       | 9.80E-22 |
| 2572232900 | t3m_01256 | Locus_type     | CDS                                                                                         |          |
| 2572232900 | t3m_01256 | Product_name   | Transmembrane secretion effector                                                            |          |
| 2572232900 | t3m_01256 | Scaffold       | t3m_contig_70_225_len_24160_read_count_2040884.28                                           |          |
| 2572232900 | t3m_01256 | Coordinates    | 21888..23174(+)                                                                             |          |
| 2572232900 | t3m_01256 | DNA_length     | 1287bp                                                                                      |          |
| 2572232900 | t3m_01256 | Protein_length | 428aa                                                                                       |          |
| 2572232900 | t3m_01256 | GC             |                                                                                             | 0.69     |
| 2572232900 | t3m_01256 | Transmembrane  | Yes                                                                                         |          |
| 2572232901 | t3m_01257 | COG_category   | [I] Lipid transport and metabolism                                                          |          |
| 2572232901 | t3m_01257 | COG0020        | Undecaprenyl pyrophosphate synthase                                                         | 5.00E-82 |
| 2572232901 | t3m_01257 | pfam01255      | Prenyltransf                                                                                | 2.40E-81 |
| 2572232901 | t3m_01257 | EC:2.5.1.89    | Tritrans, polycis-undecaprenyl-diphosphate synthase (geranylgeranyl- diphosphate specific). |          |
| 2572232901 | t3m_01257 | TIGR00055      | undecaprenyl diphosphate synthase                                                           | 4.30E-87 |
| 2572232901 | t3m_01257 | KO:K15888      | tritrans, polycis-undecaprenyl-diphosphate synthase [geranylgeranyl-di                      | 0.00E+00 |
| 2572232901 | t3m_01257 | Locus_type     | CDS                                                                                         |          |
| 2572232901 | t3m_01257 | Product_name   | Undecaprenyl pyrophosphate synthetase (EC 2.5.1.31)                                         |          |

|            |           |                |                                                   |
|------------|-----------|----------------|---------------------------------------------------|
| 2572232901 | t3m_01257 | Scaffold       | t3m_contig_70_225_len_24160_read_count_2040884.28 |
| 2572232901 | t3m_01257 | Coordinates    | 23107..23922(-)                                   |
| 2572232901 | t3m_01257 | DNA_length     | 816bp                                             |
| 2572232901 | t3m_01257 | Protein_length | 271aa                                             |
| 2572232901 | t3m_01257 | GC             | 0.67                                              |
|            |           |                |                                                   |
| 2572232902 | t3m_01258 | Locus_type     | tRNA                                              |
| 2572232902 | t3m_01258 | Product_name   | tRNA_Asp_GTC                                      |
| 2572232902 | t3m_01258 | Scaffold       | t3m_contig_70_225_len_24160_read_count_2040884.28 |
| 2572232902 | t3m_01258 | Coordinates    | 24027..24114(-)                                   |
| 2572232902 | t3m_01258 | DNA_length     | 88bp                                              |
| 2572232902 | t3m_01258 | GC             | 0.64                                              |
|            |           |                |                                                   |
| 2572232903 | t3m_01259 | Locus_type     | CDS                                               |
| 2572232903 | t3m_01259 | Product_name   | hypothetical protein                              |
| 2572232903 | t3m_01259 | Scaffold       | t3m_contig_70_235_len_23691_read_count_2097101.29 |
| 2572232903 | t3m_01259 | Coordinates    | 2..310(-)                                         |
| 2572232903 | t3m_01259 | DNA_length     | 309bp                                             |
| 2572232903 | t3m_01259 | Protein_length | 103aa                                             |
| 2572232903 | t3m_01259 | GC             | 0.62                                              |
|            |           |                |                                                   |
| 2572232904 | t3m_01260 | Locus_type     | CDS                                               |
| 2572232904 | t3m_01260 | Product_name   | hypothetical protein                              |
| 2572232904 | t3m_01260 | Scaffold       | t3m_contig_70_235_len_23691_read_count_2097101.29 |
| 2572232904 | t3m_01260 | Coordinates    | 611..1840(+)                                      |
| 2572232904 | t3m_01260 | DNA_length     | 1230bp                                            |
| 2572232904 | t3m_01260 | Protein_length | 409aa                                             |
| 2572232904 | t3m_01260 | GC             | 0.62                                              |
| 2572232904 | t3m_01260 | Transmembrane  | Yes                                               |
|            |           |                |                                                   |
| 2572232905 | t3m_01261 | Locus_type     | CDS                                               |
| 2572232905 | t3m_01261 | Product_name   | hypothetical protein                              |
| 2572232905 | t3m_01261 | Scaffold       | t3m_contig_70_235_len_23691_read_count_2097101.29 |
| 2572232905 | t3m_01261 | Coordinates    | 1914..2132(-)                                     |

|            |           |                |                                                                |          |
|------------|-----------|----------------|----------------------------------------------------------------|----------|
| 2572232905 | t3m_01261 | DNA_length     | 219bp                                                          |          |
| 2572232905 | t3m_01261 | Protein_length | 72aa                                                           |          |
| 2572232905 | t3m_01261 | GC             |                                                                | 0.68     |
| 2572232906 | t3m_01262 | COG_category   | [K] Transcription                                              |          |
| 2572232906 | t3m_01262 | COG2101        | TATA-box binding protein (TBP), component of TFIID and TFIIB   | 9.00E-67 |
| 2572232906 | t3m_01262 | pfam00352      | TBP                                                            | 5.70E-30 |
| 2572232906 | t3m_01262 | pfam00352      | TBP                                                            | 8.10E-30 |
| 2572232906 | t3m_01262 | KO:K03120      | transcription initiation factor TFIID TATA-box-binding protein | 0.00E+00 |
| 2572232906 | t3m_01262 | ITERM:01960    | TATA binding protein of transcription factor TFIID             |          |
| 2572232906 | t3m_01262 | Locus_type     | CDS                                                            |          |
| 2572232906 | t3m_01262 | Product_name   | TATA binding protein of transcription factor TFIID             |          |
| 2572232906 | t3m_01262 | Scaffold       | t3m_contig_70_235_len_23691_read_count_2097101.29              |          |
| 2572232906 | t3m_01262 | Coordinates    | 2171..2851(-)                                                  |          |
| 2572232906 | t3m_01262 | DNA_length     | 681bp                                                          |          |
| 2572232906 | t3m_01262 | Protein_length | 226aa                                                          |          |
| 2572232906 | t3m_01262 | GC             |                                                                | 0.64     |
| 2572232907 | t3m_01263 | COG_category   | [S] Function unknown                                           |          |
| 2572232907 | t3m_01263 | COG2318        | Uncharacterized protein conserved in bacteria                  | 6.00E-15 |
| 2572232907 | t3m_01263 | pfam05163      | DinB                                                           | 2.50E-20 |
| 2572232907 | t3m_01263 | Locus_type     | CDS                                                            |          |
| 2572232907 | t3m_01263 | Product_name   | Uncharacterized protein conserved in bacteria                  |          |
| 2572232907 | t3m_01263 | Scaffold       | t3m_contig_70_235_len_23691_read_count_2097101.29              |          |
| 2572232907 | t3m_01263 | Coordinates    | 3088..3567(-)                                                  |          |
| 2572232907 | t3m_01263 | DNA_length     | 480bp                                                          |          |
| 2572232907 | t3m_01263 | Protein_length | 159aa                                                          |          |
| 2572232907 | t3m_01263 | GC             |                                                                | 0.64     |
| 2572232908 | t3m_01264 | KEGG_module    | M00254: ABC-2 type transport system                            |          |
| 2572232908 | t3m_01264 | COG_category   | [V] Defense mechanisms                                         |          |
| 2572232908 | t3m_01264 | COG0842        | ABC-type multidrug transport system, permease component        | 3.00E-06 |
| 2572232908 | t3m_01264 | pfam01061      | ABC2_membrane                                                  | 1.10E-20 |
| 2572232908 | t3m_01264 | KO:K01992      | ABC-2 type transport system permease protein                   | 1.90E-24 |



|            |           |                |                                                                      |          |
|------------|-----------|----------------|----------------------------------------------------------------------|----------|
| 2572232908 | t3m_01264 | Locus_type     | CDS                                                                  |          |
| 2572232908 | t3m_01264 | Product_name   | ABC-type multidrug transport system, permease component              |          |
| 2572232908 | t3m_01264 | Scaffold       | t3m_contig_70_235_len_23691_read_count_2097101.29                    |          |
| 2572232908 | t3m_01264 | Coordinates    | 3630..4448(-)                                                        |          |
| 2572232908 | t3m_01264 | DNA_length     | 819bp                                                                |          |
| 2572232908 | t3m_01264 | Protein_length | 272aa                                                                |          |
| 2572232908 | t3m_01264 | GC             |                                                                      | 0.65     |
| 2572232908 | t3m_01264 | Transmembrane  | Yes                                                                  |          |
| 2572232909 | t3m_01265 | KEGG_module    | M00248: Putative antibiotic transport system                         |          |
| 2572232909 | t3m_01265 | COG_category   | [M] Cell wall/membrane/envelope biogenesis                           |          |
| 2572232909 | t3m_01265 | COG_category   | [G] Carbohydrate transport and metabolism                            |          |
| 2572232909 | t3m_01265 | COG1682        | ABC-type polysaccharide/polyol phosphate export systems, permease c  | 3.00E-07 |
| 2572232909 | t3m_01265 | pfam01061      | ABC2_membrane                                                        | 3.20E-10 |
| 2572232909 | t3m_01265 | KO:K09686      | antibiotic transport system permease protein                         | 1.90E-23 |
| 2572232909 | t3m_01265 | Locus_type     | CDS                                                                  |          |
| 2572232909 | t3m_01265 | Product_name   | ABC-type polysaccharide/polyol phosphate export systems, permease cc |          |
| 2572232909 | t3m_01265 | Scaffold       | t3m_contig_70_235_len_23691_read_count_2097101.29                    |          |
| 2572232909 | t3m_01265 | Coordinates    | 4467..5273(-)                                                        |          |
| 2572232909 | t3m_01265 | DNA_length     | 807bp                                                                |          |
| 2572232909 | t3m_01265 | Protein_length | 268aa                                                                |          |
| 2572232909 | t3m_01265 | GC             |                                                                      | 0.66     |
| 2572232909 | t3m_01265 | Transmembrane  | Yes                                                                  |          |
| 2572232910 | t3m_01266 | KEGG_module    | M00248: Putative antibiotic transport system                         |          |
| 2572232910 | t3m_01266 | COG_category   | [V] Defense mechanisms                                               |          |
| 2572232910 | t3m_01266 | COG1131        | ABC-type multidrug transport system, ATPase component                | 2.00E-66 |
| 2572232910 | t3m_01266 | pfam00005      | ABC_tran                                                             | 1.40E-28 |
| 2572232910 | t3m_01266 | KO:K09687      | antibiotic transport system ATP-binding protein                      | 0.00E+00 |
| 2572232910 | t3m_01266 | Locus_type     | CDS                                                                  |          |
| 2572232910 | t3m_01266 | Product_name   | ABC-type multidrug transport system, ATPase component                |          |
| 2572232910 | t3m_01266 | Scaffold       | t3m_contig_70_235_len_23691_read_count_2097101.29                    |          |
| 2572232910 | t3m_01266 | Coordinates    | 5274..6260(-)                                                        |          |
| 2572232910 | t3m_01266 | DNA_length     | 987bp                                                                |          |

|            |           |                |                                                                             |           |
|------------|-----------|----------------|-----------------------------------------------------------------------------|-----------|
| 2572232910 | t3m_01266 | Protein_length | 328aa                                                                       |           |
| 2572232910 | t3m_01266 | GC             |                                                                             | 0.66      |
| 2572232911 | t3m_01267 | COG_category   | [O] Posttranslational modification, protein turnover, chaperones            |           |
| 2572232911 | t3m_01267 | COG1180        | Pyruvate-formate lyase-activating enzyme                                    | 4.00E-38  |
| 2572232911 | t3m_01267 | pfam04055      | Radical_SAM                                                                 | 6.60E-17  |
| 2572232911 | t3m_01267 | EC:1.97.1.4    | [Formate-C-acetyltransferase]-activating enzyme.                            |           |
| 2572232911 | t3m_01267 | TIGR02494      | glycyl-radical enzyme activating protein family                             | 1.60E-62  |
| 2572232911 | t3m_01267 | KO:K04069      | pyruvate formate lyase activating enzyme [EC:1.97.1.4]                      | 0.00E+00  |
| 2572232911 | t3m_01267 | Locus_type     | CDS                                                                         |           |
| 2572232911 | t3m_01267 | Product_name   | glycyl-radical enzyme activating protein family                             |           |
| 2572232911 | t3m_01267 | Scaffold       | t3m_contig_70_235_len_23691_read_count_2097101.29                           |           |
| 2572232911 | t3m_01267 | Coordinates    | 6874..7461(+)                                                               |           |
| 2572232911 | t3m_01267 | DNA_length     | 588bp                                                                       |           |
| 2572232911 | t3m_01267 | Protein_length | 195aa                                                                       |           |
| 2572232911 | t3m_01267 | GC             |                                                                             | 0.63      |
| 2572232912 | t3m_01268 | Metacyc        | FERMENTATION-PWY: mixed acid fermentation                                   |           |
| 2572232912 | t3m_01268 | Metacyc        | PWY-5480: pyruvate fermentation to ethanol I                                |           |
| 2572232912 | t3m_01268 | Metacyc        | PWY-5493: reductive monocarboxylic acid cycle                               |           |
| 2572232912 | t3m_01268 | Metacyc        | PWY-5485: pyruvate fermentation to acetate IV                               |           |
| 2572232912 | t3m_01268 | Metacyc        | ANARESP1-PWY: respiration (anaerobic)                                       |           |
| 2572232912 | t3m_01268 | Metacyc        | PWY4LZ-257: superpathway of fermentation (<i>Chlamydomonas reinhardtii</i>) |           |
| 2572232912 | t3m_01268 | COG_category   | [C] Energy production and conversion                                        |           |
| 2572232912 | t3m_01268 | COG1882        | Pyruvate-formate lyase                                                      | 8.00E-123 |
| 2572232912 | t3m_01268 | pfam02901      | PFL                                                                         | 0.00E+00  |
| 2572232912 | t3m_01268 | pfam01228      | Gly_radical                                                                 | 7.80E-28  |
| 2572232912 | t3m_01268 | EC:2.3.1.54    | Formate C-acetyltransferase.                                                |           |
| 2572232912 | t3m_01268 | TIGR01774      | glycyl radical enzyme, PFL2/glycerol dehydratase family                     | 0.00E+00  |
| 2572232912 | t3m_01268 | KO:K00656      | formate C-acetyltransferase [EC:2.3.1.54]                                   | 0.00E+00  |
| 2572232912 | t3m_01268 | Locus_type     | CDS                                                                         |           |
| 2572232912 | t3m_01268 | Product_name   | glycyl radical enzyme, PFL2/glycerol dehydratase family                     |           |
| 2572232912 | t3m_01268 | Scaffold       | t3m_contig_70_235_len_23691_read_count_2097101.29                           |           |
| 2572232912 | t3m_01268 | Coordinates    | 7463..9850(+)                                                               |           |

|            |           |                |                                                   |          |
|------------|-----------|----------------|---------------------------------------------------|----------|
| 2572232912 | t3m_01268 | DNA_length     | 2388bp                                            |          |
| 2572232912 | t3m_01268 | Protein_length | 795aa                                             |          |
| 2572232912 | t3m_01268 | GC             |                                                   | 0.64     |
| 2572232913 | t3m_01269 | COG_category   | [E] Amino acid transport and metabolism           |          |
| 2572232913 | t3m_01269 | COG0531        | Amino acid transporters                           | 1.00E-21 |
| 2572232913 | t3m_01269 | pfam13520      | AA_permease_2                                     | 1.20E-27 |
| 2572232913 | t3m_01269 | Locus_type     | CDS                                               |          |
| 2572232913 | t3m_01269 | Product_name   | Amino acid transporters                           |          |
| 2572232913 | t3m_01269 | Scaffold       | t3m_contig_70_235_len_23691_read_count_2097101.29 |          |
| 2572232913 | t3m_01269 | Coordinates    | 9890..11326(+)                                    |          |
| 2572232913 | t3m_01269 | DNA_length     | 1437bp                                            |          |
| 2572232913 | t3m_01269 | Protein_length | 478aa                                             |          |
| 2572232913 | t3m_01269 | GC             |                                                   | 0.71     |
| 2572232913 | t3m_01269 | Transmembrane  | Yes                                               |          |
| 2572232914 | t3m_01270 | pfam07690      | MFS_1                                             | 7.90E-51 |
| 2572232914 | t3m_01270 | TIGR00711      | drug resistance transporter, EmrB/QacA subfamily  | 3.90E-68 |
| 2572232914 | t3m_01270 | Locus_type     | CDS                                               |          |
| 2572232914 | t3m_01270 | Product_name   | Major Facilitator Superfamily                     |          |
| 2572232914 | t3m_01270 | Scaffold       | t3m_contig_70_235_len_23691_read_count_2097101.29 |          |
| 2572232914 | t3m_01270 | Coordinates    | 11452..12915(+)                                   |          |
| 2572232914 | t3m_01270 | DNA_length     | 1464bp                                            |          |
| 2572232914 | t3m_01270 | Protein_length | 487aa                                             |          |
| 2572232914 | t3m_01270 | GC             |                                                   | 0.66     |
| 2572232914 | t3m_01270 | Transmembrane  | Yes                                               |          |
| 2572232915 | t3m_01271 | COG_category   | [F] Nucleotide transport and metabolism           |          |
| 2572232915 | t3m_01271 | COG0563        | Adenylate kinase and related kinases              | 2.00E-06 |
| 2572232915 | t3m_01271 | pfam13671      | AAA_33                                            | 3.50E-11 |
| 2572232915 | t3m_01271 | Locus_type     | CDS                                               |          |
| 2572232915 | t3m_01271 | Product_name   | Adenylate kinase and related kinases              |          |
| 2572232915 | t3m_01271 | Scaffold       | t3m_contig_70_235_len_23691_read_count_2097101.29 |          |
| 2572232915 | t3m_01271 | Coordinates    | 13018..13509(-)                                   |          |

|            |           |                |                                                           |          |
|------------|-----------|----------------|-----------------------------------------------------------|----------|
| 2572232915 | t3m_01271 | DNA_length     | 492bp                                                     |          |
| 2572232915 | t3m_01271 | Protein_length | 163aa                                                     |          |
| 2572232915 | t3m_01271 | GC             |                                                           | 0.61     |
| 2572232916 | t3m_01272 | Locus_type     | CDS                                                       |          |
| 2572232916 | t3m_01272 | Product_name   | hypothetical protein                                      |          |
| 2572232916 | t3m_01272 | Scaffold       | t3m_contig_70_235_len_23691_read_count_2097101.29         |          |
| 2572232916 | t3m_01272 | Coordinates    | 13848..14651(+)                                           |          |
| 2572232916 | t3m_01272 | DNA_length     | 804bp                                                     |          |
| 2572232916 | t3m_01272 | Protein_length | 267aa                                                     |          |
| 2572232916 | t3m_01272 | GC             |                                                           | 0.65     |
| 2572232916 | t3m_01272 | Transmembrane  | Yes                                                       |          |
| 2572232917 | t3m_01273 | COG_category   | [H] Coenzyme transport and metabolism                     |          |
| 2572232917 | t3m_01273 | COG2226        | Methylase involved in ubiquinone/menaquinone biosynthesis | 2.00E-14 |
| 2572232917 | t3m_01273 | pfam08241      | Methyltransf_11                                           | 4.70E-15 |
| 2572232917 | t3m_01273 | Locus_type     | CDS                                                       |          |
| 2572232917 | t3m_01273 | Product_name   | Methylase involved in ubiquinone/menaquinone biosynthesis |          |
| 2572232917 | t3m_01273 | Scaffold       | t3m_contig_70_235_len_23691_read_count_2097101.29         |          |
| 2572232917 | t3m_01273 | Coordinates    | 14697..15431(-)                                           |          |
| 2572232917 | t3m_01273 | DNA_length     | 735bp                                                     |          |
| 2572232917 | t3m_01273 | Protein_length | 244aa                                                     |          |
| 2572232917 | t3m_01273 | GC             |                                                           | 0.66     |
| 2572232918 | t3m_01274 | Metacyc        | PWY-5386: methylglyoxal degradation I                     |          |
| 2572232918 | t3m_01274 | COG_category   | [E] Amino acid transport and metabolism                   |          |
| 2572232918 | t3m_01274 | COG0346        | Lactoylglutathione lyase and related lyases               | 5.00E-09 |
| 2572232918 | t3m_01274 | pfam12681      | Glyoxalase_2                                              | 2.30E-12 |
| 2572232918 | t3m_01274 | EC:4.4.1.5     | Lactoylglutathione lyase.                                 |          |
| 2572232918 | t3m_01274 | KO:K01759      | lactoylglutathione lyase [EC:4.4.1.5]                     | 5.50E-09 |
| 2572232918 | t3m_01274 | Locus_type     | CDS                                                       |          |
| 2572232918 | t3m_01274 | Product_name   | Lactoylglutathione lyase and related lyases               |          |
| 2572232918 | t3m_01274 | Scaffold       | t3m_contig_70_235_len_23691_read_count_2097101.29         |          |
| 2572232918 | t3m_01274 | Coordinates    | 15441..15878(-)                                           |          |

|            |           |                |                                                                                      |          |
|------------|-----------|----------------|--------------------------------------------------------------------------------------|----------|
| 2572232918 | t3m_01274 | DNA_length     | 438bp                                                                                |          |
| 2572232918 | t3m_01274 | Protein_length | 145aa                                                                                |          |
| 2572232918 | t3m_01274 | GC             |                                                                                      | 0.69     |
| 2572232919 | t3m_01275 | Locus_type     | CDS                                                                                  |          |
| 2572232919 | t3m_01275 | Product_name   | hypothetical protein                                                                 |          |
| 2572232919 | t3m_01275 | Scaffold       | t3m_contig_70_235_len_23691_read_count_2097101.29                                    |          |
| 2572232919 | t3m_01275 | Coordinates    | 15984..16430(-)                                                                      |          |
| 2572232919 | t3m_01275 | DNA_length     | 447bp                                                                                |          |
| 2572232919 | t3m_01275 | Protein_length | 148aa                                                                                |          |
| 2572232919 | t3m_01275 | GC             |                                                                                      | 0.64     |
| 2572232919 | t3m_01275 | Transmembrane  | Yes                                                                                  |          |
| 2572232920 | t3m_01276 | pfam08241      | Methyltransf_11                                                                      | 1.70E-17 |
| 2572232920 | t3m_01276 | Locus_type     | CDS                                                                                  |          |
| 2572232920 | t3m_01276 | Product_name   | Methyltransferase domain                                                             |          |
| 2572232920 | t3m_01276 | Scaffold       | t3m_contig_70_235_len_23691_read_count_2097101.29                                    |          |
| 2572232920 | t3m_01276 | Coordinates    | 16623..17411(+)                                                                      |          |
| 2572232920 | t3m_01276 | DNA_length     | 789bp                                                                                |          |
| 2572232920 | t3m_01276 | Protein_length | 262aa                                                                                |          |
| 2572232920 | t3m_01276 | GC             |                                                                                      | 0.7      |
| 2572232921 | t3m_01277 | KEGG_module    | M00173: Reductive citric acid cycle (Arnon-Buchanan cycle)                           |          |
| 2572232921 | t3m_01277 | KEGG_module    | M00433: Lysine biosynthesis, 2-oxoglutarate => 2-oxoadipate                          |          |
| 2572232921 | t3m_01277 | KEGG_module    | M00030: Lysine biosynthesis, AAA pathway, 2-oxoglutarate => 2-aminoadipate => lysine |          |
| 2572232921 | t3m_01277 | KEGG_module    | M00012: Glyoxylate cycle                                                             |          |
| 2572232921 | t3m_01277 | KEGG_module    | M00010: Citrate cycle, first carbon oxidation, oxaloacetate => 2-oxoglutarate        |          |
| 2572232921 | t3m_01277 | KEGG_module    | M00009: Citrate cycle (TCA cycle, Krebs cycle)                                       |          |
| 2572232921 | t3m_01277 | Metacyc        | PWY-6679: jadomycin biosynthesis                                                     |          |
| 2572232921 | t3m_01277 | Metacyc        | PWY1A0-6325: actinorhodin biosynthesis                                               |          |
| 2572232921 | t3m_01277 | Metacyc        | PWY-5367: petroselinic acid biosynthesis                                             |          |
| 2572232921 | t3m_01277 | Metacyc        | PWY-7053: docosa-hexanoate biosynthesis I                                            |          |
| 2572232921 | t3m_01277 | Metacyc        | PWY-6863: pyruvate fermentation to hexanol                                           |          |
| 2572232921 | t3m_01277 | Metacyc        | PWY-721: 3-methylquinoline degradation                                               |          |

|            |           |         |                                                                                     |
|------------|-----------|---------|-------------------------------------------------------------------------------------|
| 2572232921 | t3m_01277 | Metacyc | PWY-7130: L-glucose degradation                                                     |
| 2572232921 | t3m_01277 | Metacyc | PWY-7104: dTDP-L-megosamine biosynthesis                                            |
| 2572232921 | t3m_01277 | Metacyc | PWY-6951: docosahexanoate biosynthesis II                                           |
| 2572232921 | t3m_01277 | Metacyc | PWY-6583: pyruvate fermentation to butanol I                                        |
| 2572232921 | t3m_01277 | Metacyc | 3-HYDROXYPHENYLACETATE-DEGRADATION-PWY: 4-hydroxyphenylacetate degradation          |
| 2572232921 | t3m_01277 | Metacyc | PWY-6948: sitosterol degradation to androstenedione                                 |
| 2572232921 | t3m_01277 | Metacyc | PWY-7189: C-glycosylflavone biosynthesis III                                        |
| 2572232921 | t3m_01277 | Metacyc | PWY-6627: salinosporamide A biosynthesis                                            |
| 2572232921 | t3m_01277 | Metacyc | PWY-5353: arachidonate biosynthesis                                                 |
| 2572232921 | t3m_01277 | Metacyc | PWY-6883: pyruvate fermentation to butanol II                                       |
| 2572232921 | t3m_01277 | Metacyc | PWY-6946: cholesterol degradation to androstenedione II (cholesterol dehydrogenase) |
| 2572232921 | t3m_01277 | Metacyc | PWY-6945: cholesterol degradation to androstenedione I (cholesterol oxidase)        |
| 2572232921 | t3m_01277 | Metacyc | PWY-6974: dTDP-L-olivose biosynthesis                                               |
| 2572232921 | t3m_01277 | Metacyc | CENTFERM-PWY: pyruvate fermentation to butanoate                                    |
| 2572232921 | t3m_01277 | Metacyc | CARNMET-PWY: carnitine degradation I                                                |
| 2572232921 | t3m_01277 | Metacyc | PWY-6976: dTDP-L-mycarose biosynthesis                                              |
| 2572232921 | t3m_01277 | Metacyc | PWY-2463: medicarpin biosynthesis                                                   |
| 2572232921 | t3m_01277 | Metacyc | PWY-5972: stearate biosynthesis I (animals)                                         |
| 2572232921 | t3m_01277 | Metacyc | PWY-6672: <i>cis</i>-genanyl-CoA degradation                                        |
| 2572232921 | t3m_01277 | Metacyc | P3-PWY: gallate degradation III (anaerobic)                                         |
| 2572232921 | t3m_01277 | Metacyc | PWY-5177: glutaryl-CoA degradation                                                  |
| 2572232921 | t3m_01277 | Metacyc | PWY-6944: androstenedione degradation                                               |
| 2572232921 | t3m_01277 | Metacyc | PWY-6973: dTDP-D-olivose, dTDP-D-oliose and dTDP-D-mycarose biosynthesis            |
| 2572232921 | t3m_01277 | Metacyc | PWY-5061: 6,7,4'-trihydroxyisoflavone biosynthesis                                  |
| 2572232921 | t3m_01277 | Metacyc | PWY-7188: C-glycosylflavone biosynthesis II                                         |
| 2572232921 | t3m_01277 | Metacyc | PWY-2761: glyceollin biosynthesis I                                                 |
| 2572232921 | t3m_01277 | Metacyc | PWY-2464: maackiain biosynthesis                                                    |
| 2572232921 | t3m_01277 | Metacyc | PWYG-321: mycolate biosynthesis                                                     |
| 2572232921 | t3m_01277 | Metacyc | PWY-5789: 3-hydroxypropionate/4-hydroxybutyrate cycle                               |
| 2572232921 | t3m_01277 | Metacyc | PWY-6749: CMP-legionaminate biosynthesis I                                          |
| 2572232921 | t3m_01277 | Metacyc | PWY-6808: dTDP-D-forosamine biosynthesis                                            |
| 2572232921 | t3m_01277 | Metacyc | PWY-6721: sangivamycin biosynthesis                                                 |
| 2572232921 | t3m_01277 | Metacyc | PWY-6602: C-glycosylflavone biosynthesis I                                          |
| 2572232921 | t3m_01277 | Metacyc | P162-PWY: glutamate degradation V (via hydroxyglutarate)                            |

|            |           |                |                                                              |          |
|------------|-----------|----------------|--------------------------------------------------------------|----------|
| 2572232921 | t3m_01277 | Metacyc        | P345-PWY: aldoxime degradation                               |          |
| 2572232921 | t3m_01277 | COG_category   | [C] Energy production and conversion                         |          |
| 2572232921 | t3m_01277 | COG1048        | Aconitase A                                                  | 0.00E+00 |
| 2572232921 | t3m_01277 | pfam00330      | Aconitase                                                    | 0.00E+00 |
| 2572232921 | t3m_01277 | pfam00694      | Aconitase_C                                                  | 4.20E-39 |
| 2572232921 | t3m_01277 | EC:4.2.1.-     | Lyases. Carbon-oxygen lyases. Hydro-lyases.                  |          |
| 2572232921 | t3m_01277 | EC:4.2.1.3     | Aconitate hydratase.                                         |          |
| 2572232921 | t3m_01277 | TIGR01341      | aconitate hydratase 1                                        | 0.00E+00 |
| 2572232921 | t3m_01277 | KO:K01681      | aconitate hydratase 1 / homoaconitase [EC:4.2.1.3 4.2.1.-]   | 0.00E+00 |
| 2572232921 | t3m_01277 | Locus_type     | CDS                                                          |          |
| 2572232921 | t3m_01277 | Product_name   | aconitate hydratase 1                                        |          |
| 2572232921 | t3m_01277 | Scaffold       | t3m_contig_70_235_len_23691_read_count_2097101.29            |          |
| 2572232921 | t3m_01277 | Coordinates    | 17432..20113(-)                                              |          |
| 2572232921 | t3m_01277 | DNA_length     | 2682bp                                                       |          |
| 2572232921 | t3m_01277 | Protein_length | 893aa                                                        |          |
| 2572232921 | t3m_01277 | GC             |                                                              | 0.69     |
| 2572232922 | t3m_01278 | KEGG_module    | M00190: Iron(III) transport system                           |          |
| 2572232922 | t3m_01278 | COG_category   | [G] Carbohydrate transport and metabolism                    |          |
| 2572232922 | t3m_01278 | COG3839        | ABC-type sugar transport systems, ATPase components          | 1.00E-73 |
| 2572232922 | t3m_01278 | pfam00005      | ABC_tran                                                     | 1.50E-34 |
| 2572232922 | t3m_01278 | pfam08402      | TOBE_2                                                       | 1.30E-04 |
| 2572232922 | t3m_01278 | EC:3.6.3.30    | Fe(3+)-transporting ATPase.                                  |          |
| 2572232922 | t3m_01278 | KO:K02010      | iron(III) transport system ATP-binding protein [EC:3.6.3.30] | 0.00E+00 |
| 2572232922 | t3m_01278 | Locus_type     | CDS                                                          |          |
| 2572232922 | t3m_01278 | Product_name   | ABC-type sugar transport systems, ATPase components          |          |
| 2572232922 | t3m_01278 | Scaffold       | t3m_contig_70_235_len_23691_read_count_2097101.29            |          |
| 2572232922 | t3m_01278 | Coordinates    | 20160..21125(-)                                              |          |
| 2572232922 | t3m_01278 | DNA_length     | 966bp                                                        |          |
| 2572232922 | t3m_01278 | Protein_length | 321aa                                                        |          |
| 2572232922 | t3m_01278 | GC             |                                                              | 0.7      |
| 2572232923 | t3m_01279 | KEGG_module    | M00191: Thiamine transport system                            |          |
| 2572232923 | t3m_01279 | COG_category   | [P] Inorganic ion transport and metabolism                   |          |

|            |           |                |                                                                |          |
|------------|-----------|----------------|----------------------------------------------------------------|----------|
| 2572232923 | t3m_01279 | COG1178        | ABC-type Fe <sup>3+</sup> transport system, permease component | 1.00E-41 |
| 2572232923 | t3m_01279 | pfam00528      | BPD_transp_1                                                   | 5.60E-10 |
| 2572232923 | t3m_01279 | KO:K02063      | thiamine transport system permease protein                     | 0.00E+00 |
| 2572232923 | t3m_01279 | Locus_type     | CDS                                                            |          |
| 2572232923 | t3m_01279 | Product_name   | ABC-type Fe <sup>3+</sup> transport system, permease component |          |
| 2572232923 | t3m_01279 | Scaffold       | t3m_contig_70_235_len_23691_read_count_2097101.29              |          |
| 2572232923 | t3m_01279 | Coordinates    | 21112..22740(-)                                                |          |
| 2572232923 | t3m_01279 | DNA_length     | 1629bp                                                         |          |
| 2572232923 | t3m_01279 | Protein_length | 542aa                                                          |          |
| 2572232923 | t3m_01279 | GC             |                                                                | 0.7      |
| 2572232923 | t3m_01279 | Transmembrane  | Yes                                                            |          |
| 2572232923 | t3m_01279 | Fused_gene     | Yes                                                            |          |
| 2572232924 | t3m_01280 | KEGG_module    | M00191: Thiamine transport system                              |          |
| 2572232924 | t3m_01280 | COG_category   | [H] Coenzyme transport and metabolism                          |          |
| 2572232924 | t3m_01280 | COG4143        | ABC-type thiamine transport system, periplasmic component      | 4.00E-28 |
| 2572232924 | t3m_01280 | TIGR01254      | ABC transporter periplasmic binding protein, thiB subfamily    | 1.50E-29 |
| 2572232924 | t3m_01280 | KO:K02064      | thiamine transport system substrate-binding protein            | 2.30E-37 |
| 2572232924 | t3m_01280 | Locus_type     | CDS                                                            |          |
| 2572232924 | t3m_01280 | Product_name   | ABC-type thiamine transport system, periplasmic component      |          |
| 2572232924 | t3m_01280 | Scaffold       | t3m_contig_70_235_len_23691_read_count_2097101.29              |          |
| 2572232924 | t3m_01280 | Coordinates    | 22737..23690(-)                                                |          |
| 2572232924 | t3m_01280 | DNA_length     | 954bp                                                          |          |
| 2572232924 | t3m_01280 | Protein_length | 317aa                                                          |          |
| 2572232924 | t3m_01280 | GC             |                                                                | 0.68     |
| 2572232925 | t3m_01281 | pfam01061      | ABC2_membrane                                                  | 2.40E-15 |
| 2572232925 | t3m_01281 | Locus_type     | CDS                                                            |          |
| 2572232925 | t3m_01281 | Product_name   | ABC-2 type transporter                                         |          |
| 2572232925 | t3m_01281 | Scaffold       | t3m_contig_70_244_len_23258_read_count_1799640.30              |          |
| 2572232925 | t3m_01281 | Coordinates    | 3..314(+)                                                      |          |
| 2572232925 | t3m_01281 | DNA_length     | 312bp                                                          |          |
| 2572232925 | t3m_01281 | Protein_length | 103aa                                                          |          |
| 2572232925 | t3m_01281 | GC             |                                                                | 0.6      |



|            |           |                |                                                                        |           |
|------------|-----------|----------------|------------------------------------------------------------------------|-----------|
| 2572232925 | t3m_01281 | Transmembrane  | Yes                                                                    |           |
| 2572232926 | t3m_01282 | COG_category   | [R] General function prediction only                                   |           |
| 2572232926 | t3m_01282 | COG1853        | Conserved protein/domain typically associated with flavoprotein oxyge  | 6.00E-27  |
| 2572232926 | t3m_01282 | pfam01613      | Flavin_Reduct                                                          | 4.40E-34  |
| 2572232926 | t3m_01282 | Locus_type     | CDS                                                                    |           |
| 2572232926 | t3m_01282 | Product_name   | Conserved protein/domain typically associated with flavoprotein oxyger |           |
| 2572232926 | t3m_01282 | Scaffold       | t3m_contig_70_244_len_23258_read_count_1799640.30                      |           |
| 2572232926 | t3m_01282 | Coordinates    | 311..850(+)                                                            |           |
| 2572232926 | t3m_01282 | DNA_length     | 540bp                                                                  |           |
| 2572232926 | t3m_01282 | Protein_length | 179aa                                                                  |           |
| 2572232926 | t3m_01282 | GC             |                                                                        | 0.7       |
| 2572232927 | t3m_01283 | Metacyc        | THIOREDOX-PWY: thioredoxin pathway                                     |           |
| 2572232927 | t3m_01283 | COG_category   | [O] Posttranslational modification, protein turnover, chaperones       |           |
| 2572232927 | t3m_01283 | COG0492        | Thioredoxin reductase                                                  | 1.00E-91  |
| 2572232927 | t3m_01283 | pfam00070      | Pyr_redox                                                              | 2.00E-14  |
| 2572232927 | t3m_01283 | pfam07992      | Pyr_redox_2                                                            | 1.70E-30  |
| 2572232927 | t3m_01283 | EC:1.8.1.9     | Thioredoxin-disulfide reductase.                                       |           |
| 2572232927 | t3m_01283 | TIGR01292      | thioredoxin-disulfide reductase                                        | 1.30E-126 |
| 2572232927 | t3m_01283 | KO:K00384      | thioredoxin reductase (NADPH) [EC:1.8.1.9]                             | 0.00E+00  |
| 2572232927 | t3m_01283 | Locus_type     | CDS                                                                    |           |
| 2572232927 | t3m_01283 | Product_name   | thioredoxin-disulfide reductase                                        |           |
| 2572232927 | t3m_01283 | Scaffold       | t3m_contig_70_244_len_23258_read_count_1799640.30                      |           |
| 2572232927 | t3m_01283 | Coordinates    | 889..1857(+)                                                           |           |
| 2572232927 | t3m_01283 | DNA_length     | 969bp                                                                  |           |
| 2572232927 | t3m_01283 | Protein_length | 322aa                                                                  |           |
| 2572232927 | t3m_01283 | GC             |                                                                        | 0.7       |
| 2572232928 | t3m_01284 | pfam12838      | Fer4_7                                                                 | 3.30E-10  |
| 2572232928 | t3m_01284 | Locus_type     | CDS                                                                    |           |
| 2572232928 | t3m_01284 | Product_name   | 4Fe-4S dicluster domain                                                |           |
| 2572232928 | t3m_01284 | Scaffold       | t3m_contig_70_244_len_23258_read_count_1799640.30                      |           |
| 2572232928 | t3m_01284 | Coordinates    | 1926..2117(+)                                                          |           |

|            |           |                |                                                                         |          |
|------------|-----------|----------------|-------------------------------------------------------------------------|----------|
| 2572232928 | t3m_01284 | DNA_length     | 192bp                                                                   |          |
| 2572232928 | t3m_01284 | Protein_length | 63aa                                                                    |          |
| 2572232928 | t3m_01284 | GC             |                                                                         | 0.62     |
| 2572232929 | t3m_01285 | COG_category   | [C] Energy production and conversion                                    |          |
| 2572232929 | t3m_01285 | COG0644        | Dehydrogenases (flavoproteins)                                          | 7.00E-63 |
| 2572232929 | t3m_01285 | pfam01494      | FAD_binding_3                                                           | 9.40E-17 |
| 2572232929 | t3m_01285 | TIGR02032      | geranylgeranyl reductase family                                         | 2.50E-69 |
| 2572232929 | t3m_01285 | ITERM:05620    | 2,3-di-O-geranylgeranylglyceryl phosphate reductase (NADH) (EC 1.3.1.-) |          |
| 2572232929 | t3m_01285 | Locus_type     | CDS                                                                     |          |
| 2572232929 | t3m_01285 | Product_name   | 2,3-di-O-geranylgeranylglyceryl phosphate reductase (NADH) (EC 1.3.1.-) |          |
| 2572232929 | t3m_01285 | Scaffold       | t3m_contig_70_244_len_23258_read_count_1799640.30                       |          |
| 2572232929 | t3m_01285 | Coordinates    | 2140..3327(+)                                                           |          |
| 2572232929 | t3m_01285 | DNA_length     | 1188bp                                                                  |          |
| 2572232929 | t3m_01285 | Protein_length | 395aa                                                                   |          |
| 2572232929 | t3m_01285 | GC             |                                                                         | 0.65     |
| 2572232930 | t3m_01286 | Locus_type     | CDS                                                                     |          |
| 2572232930 | t3m_01286 | Product_name   | hypothetical protein                                                    |          |
| 2572232930 | t3m_01286 | Scaffold       | t3m_contig_70_244_len_23258_read_count_1799640.30                       |          |
| 2572232930 | t3m_01286 | Coordinates    | 3346..3969(+)                                                           |          |
| 2572232930 | t3m_01286 | DNA_length     | 624bp                                                                   |          |
| 2572232930 | t3m_01286 | Protein_length | 207aa                                                                   |          |
| 2572232930 | t3m_01286 | GC             |                                                                         | 0.73     |
| 2572232931 | t3m_01287 | Locus_type     | CDS                                                                     |          |
| 2572232931 | t3m_01287 | Product_name   | hypothetical protein                                                    |          |
| 2572232931 | t3m_01287 | Scaffold       | t3m_contig_70_244_len_23258_read_count_1799640.30                       |          |
| 2572232931 | t3m_01287 | Coordinates    | 3976..4326(+)                                                           |          |
| 2572232931 | t3m_01287 | DNA_length     | 351bp                                                                   |          |
| 2572232931 | t3m_01287 | Protein_length | 116aa                                                                   |          |
| 2572232931 | t3m_01287 | GC             |                                                                         | 0.74     |
| 2572232932 | t3m_01288 | COG_category   | [S] Function unknown                                                    |          |

|            |           |                |                                                   |          |
|------------|-----------|----------------|---------------------------------------------------|----------|
| 2572232932 | t3m_01288 | COG3342        | Uncharacterized conserved protein                 | 2.00E-75 |
| 2572232932 | t3m_01288 | pfam08823      | PG_binding_2                                      | 1.10E-13 |
| 2572232932 | t3m_01288 | pfam06267      | DUF1028                                           | 7.90E-70 |
| 2572232932 | t3m_01288 | Locus_type     | CDS                                               |          |
| 2572232932 | t3m_01288 | Product_name   | Uncharacterized conserved protein                 |          |
| 2572232932 | t3m_01288 | Scaffold       | t3m_contig_70_244_len_23258_read_count_1799640.30 |          |
| 2572232932 | t3m_01288 | Coordinates    | 4353..5354(+)                                     |          |
| 2572232932 | t3m_01288 | DNA_length     | 1002bp                                            |          |
| 2572232932 | t3m_01288 | Protein_length | 333aa                                             |          |
| 2572232932 | t3m_01288 | GC             |                                                   | 0.69     |
| 2572232933 | t3m_01289 | Locus_type     | CDS                                               |          |
| 2572232933 | t3m_01289 | Product_name   | hypothetical protein                              |          |
| 2572232933 | t3m_01289 | Scaffold       | t3m_contig_70_244_len_23258_read_count_1799640.30 |          |
| 2572232933 | t3m_01289 | Coordinates    | 5405..5590(+)                                     |          |
| 2572232933 | t3m_01289 | DNA_length     | 186bp                                             |          |
| 2572232933 | t3m_01289 | Protein_length | 61aa                                              |          |
| 2572232933 | t3m_01289 | GC             |                                                   | 0.72     |
| 2572232934 | t3m_01290 | pfam02517      | Abi                                               | 1.50E-13 |
| 2572232934 | t3m_01290 | Locus_type     | CDS                                               |          |
| 2572232934 | t3m_01290 | Product_name   | CAAX protease self-immunity                       |          |
| 2572232934 | t3m_01290 | Scaffold       | t3m_contig_70_244_len_23258_read_count_1799640.30 |          |
| 2572232934 | t3m_01290 | Coordinates    | 5623..6474(+)                                     |          |
| 2572232934 | t3m_01290 | DNA_length     | 852bp                                             |          |
| 2572232934 | t3m_01290 | Protein_length | 283aa                                             |          |
| 2572232934 | t3m_01290 | GC             |                                                   | 0.68     |
| 2572232934 | t3m_01290 | Transmembrane  | Yes                                               |          |
| 2572232935 | t3m_01291 | COG_category   | [R] General function prediction only              |          |
| 2572232935 | t3m_01291 | COG1832        | Predicted CoA-binding protein                     | 1.00E-43 |
| 2572232935 | t3m_01291 | pfam13380      | CoA_binding_2                                     | 2.40E-40 |
| 2572232935 | t3m_01291 | Locus_type     | CDS                                               |          |
| 2572232935 | t3m_01291 | Product_name   | Predicted CoA-binding protein                     |          |

|            |           |                |                                                     |          |
|------------|-----------|----------------|-----------------------------------------------------|----------|
| 2572232935 | t3m_01291 | Scaffold       | t3m_contig_70_244_len_23258_read_count_1799640.30   |          |
| 2572232935 | t3m_01291 | Coordinates    | 6538..6972(+)                                       |          |
| 2572232935 | t3m_01291 | DNA_length     | 435bp                                               |          |
| 2572232935 | t3m_01291 | Protein_length | 144aa                                               |          |
| 2572232935 | t3m_01291 | GC             |                                                     | 0.68     |
|            |           |                |                                                     |          |
| 2572232936 | t3m_01292 | Locus_type     | CDS                                                 |          |
| 2572232936 | t3m_01292 | Product_name   | hypothetical protein                                |          |
| 2572232936 | t3m_01292 | Scaffold       | t3m_contig_70_244_len_23258_read_count_1799640.30   |          |
| 2572232936 | t3m_01292 | Coordinates    | 6982..7791(+)                                       |          |
| 2572232936 | t3m_01292 | DNA_length     | 810bp                                               |          |
| 2572232936 | t3m_01292 | Protein_length | 269aa                                               |          |
| 2572232936 | t3m_01292 | GC             |                                                     | 0.71     |
|            |           |                |                                                     |          |
| 2572232937 | t3m_01293 | KEGG_module    | M00359: Aminoacyl-tRNA biosynthesis, eukaryotes     |          |
| 2572232937 | t3m_01293 | KEGG_module    | M00360: Aminoacyl-tRNA biosynthesis, prokaryotes    |          |
| 2572232937 | t3m_01293 | Metacyc        | TRNA-CHARGING-PWY: tRNA charging                    |          |
| 2572232937 | t3m_01293 | IMG_pathway    | 494: L-isoleucine ligation to tRNA(Ile)             |          |
| 2572232937 | t3m_01293 | COG_category   | [J] Translation, ribosomal structure and biogenesis |          |
| 2572232937 | t3m_01293 | COG0060        | Isoleucyl-tRNA synthetase                           | 0.00E+00 |
| 2572232937 | t3m_01293 | pfam00133      | tRNA-synt_1                                         | 0.00E+00 |
| 2572232937 | t3m_01293 | pfam08264      | Anticodon_1                                         | 3.10E-27 |
| 2572232937 | t3m_01293 | EC:6.1.1.5     | Isoleucine--tRNA ligase.                            |          |
| 2572232937 | t3m_01293 | TIGR00392      | isoleucyl-tRNA synthetase                           | 0.00E+00 |
| 2572232937 | t3m_01293 | KO:K01870      | isoleucyl-tRNA synthetase [EC:6.1.1.5]              | 0.00E+00 |
| 2572232937 | t3m_01293 | ITERM:00399    | Isoleucyl-tRNA synthetase (EC 6.1.1.5)              |          |
| 2572232937 | t3m_01293 | Locus_type     | CDS                                                 |          |
| 2572232937 | t3m_01293 | Product_name   | Isoleucyl-tRNA synthetase (EC 6.1.1.5)              |          |
| 2572232937 | t3m_01293 | Scaffold       | t3m_contig_70_244_len_23258_read_count_1799640.30   |          |
| 2572232937 | t3m_01293 | Coordinates    | 7843..10806(+)                                      |          |
| 2572232937 | t3m_01293 | DNA_length     | 2964bp                                              |          |
| 2572232937 | t3m_01293 | Protein_length | 987aa                                               |          |
| 2572232937 | t3m_01293 | GC             |                                                     | 0.71     |

|            |           |                |                                                                 |          |
|------------|-----------|----------------|-----------------------------------------------------------------|----------|
| 2572232938 | t3m_01294 | COG_category   | [S] Function unknown                                            |          |
| 2572232938 | t3m_01294 | COG2078        | Uncharacterized conserved protein                               | 4.00E-51 |
| 2572232938 | t3m_01294 | pfam01871      | AMMECR1                                                         | 1.40E-49 |
| 2572232938 | t3m_01294 | TIGR00296      | uncharacterized protein, PH0010 family                          | 9.40E-60 |
| 2572232938 | t3m_01294 | TIGR04335      | AmmeMemoRadiSam system protein A                                | 1.20E-50 |
| 2572232938 | t3m_01294 | KO:K09141      | hypothetical protein                                            | 4.20E-45 |
| 2572232938 | t3m_01294 | Locus_type     | CDS                                                             |          |
| 2572232938 | t3m_01294 | Product_name   | uncharacterized protein, PH0010 family/AmmeMemoRadiSam system p |          |
| 2572232938 | t3m_01294 | Scaffold       | t3m_contig_70_244_len_23258_read_count_1799640.30               |          |
| 2572232938 | t3m_01294 | Coordinates    | 10772..11428(-)                                                 |          |
| 2572232938 | t3m_01294 | DNA_length     | 657bp                                                           |          |
| 2572232938 | t3m_01294 | Protein_length | 218aa                                                           |          |
| 2572232938 | t3m_01294 | GC             |                                                                 | 0.73     |
| 2572232939 | t3m_01295 | KEGG_module    | M00177: Ribosome, eukaryotes                                    |          |
| 2572232939 | t3m_01295 | KEGG_module    | M00179: Ribosome, archaea                                       |          |
| 2572232939 | t3m_01295 | COG_category   | [J] Translation, ribosomal structure and biogenesis             |          |
| 2572232939 | t3m_01295 | COG1552        | Ribosomal protein L40E                                          | 2.00E-07 |
| 2572232939 | t3m_01295 | pfam01020      | Ribosomal_L40e                                                  | 2.60E-05 |
| 2572232939 | t3m_01295 | KO:K02927      | large subunit ribosomal protein L40e                            | 2.40E-13 |
| 2572232939 | t3m_01295 | ITERM:00273    | LSU ribosomal protein L40E                                      |          |
| 2572232939 | t3m_01295 | Locus_type     | CDS                                                             |          |
| 2572232939 | t3m_01295 | Product_name   | LSU ribosomal protein L40E                                      |          |
| 2572232939 | t3m_01295 | Scaffold       | t3m_contig_70_244_len_23258_read_count_1799640.30               |          |
| 2572232939 | t3m_01295 | Coordinates    | 11517..11669(+)                                                 |          |
| 2572232939 | t3m_01295 | DNA_length     | 153bp                                                           |          |
| 2572232939 | t3m_01295 | Protein_length | 50aa                                                            |          |
| 2572232939 | t3m_01295 | GC             |                                                                 | 0.65     |
| 2572232940 | t3m_01296 | COG_category   | [M] Cell wall/membrane/envelope biogenesis                      |          |
| 2572232940 | t3m_01296 | COG0463        | Glycosyltransferases involved in cell wall biogenesis           | 2.00E-14 |
| 2572232940 | t3m_01296 | pfam00535      | Glycos_transf_2                                                 | 3.80E-19 |
| 2572232940 | t3m_01296 | Locus_type     | CDS                                                             |          |
| 2572232940 | t3m_01296 | Product_name   | Glycosyltransferases involved in cell wall biogenesis           |          |

|            |           |                |                                                                  |          |
|------------|-----------|----------------|------------------------------------------------------------------|----------|
| 2572232940 | t3m_01296 | Scaffold       | t3m_contig_70_244_len_23258_read_count_1799640.30                |          |
| 2572232940 | t3m_01296 | Coordinates    | 11742..12533(-)                                                  |          |
| 2572232940 | t3m_01296 | DNA_length     | 792bp                                                            |          |
| 2572232940 | t3m_01296 | Protein_length | 263aa                                                            |          |
| 2572232940 | t3m_01296 | GC             |                                                                  | 0.69     |
| 2572232941 | t3m_01297 | COG_category   | [S] Function unknown                                             |          |
| 2572232941 | t3m_01297 | COG1371        | Uncharacterized conserved protein                                | 8.00E-15 |
| 2572232941 | t3m_01297 | pfam01951      | Archease                                                         | 1.50E-19 |
| 2572232941 | t3m_01297 | Locus_type     | CDS                                                              |          |
| 2572232941 | t3m_01297 | Product_name   | Uncharacterized conserved protein                                |          |
| 2572232941 | t3m_01297 | Scaffold       | t3m_contig_70_244_len_23258_read_count_1799640.30                |          |
| 2572232941 | t3m_01297 | Coordinates    | 12731..13039(+)                                                  |          |
| 2572232941 | t3m_01297 | DNA_length     | 309bp                                                            |          |
| 2572232941 | t3m_01297 | Protein_length | 102aa                                                            |          |
| 2572232941 | t3m_01297 | GC             |                                                                  | 0.7      |
| 2572232942 | t3m_01298 | Metacyc        | PWY-6749: CMP-legionaminate biosynthesis I                       |          |
| 2572232942 | t3m_01298 | Metacyc        | PWY-6627: salinosporamide A biosynthesis                         |          |
| 2572232942 | t3m_01298 | Metacyc        | PWY-6942: dTDP-D-desosamine biosynthesis                         |          |
| 2572232942 | t3m_01298 | Metacyc        | PWY-1186: homomethionine biosynthesis                            |          |
| 2572232942 | t3m_01298 | Metacyc        | PWY-7014: paromamine biosynthesis I                              |          |
| 2572232942 | t3m_01298 | Metacyc        | PWY-5710: capsaicin biosynthesis                                 |          |
| 2572232942 | t3m_01298 | Metacyc        | PWYQT-4474: glucosinolate biosynthesis from pentahomomethionine  |          |
| 2572232942 | t3m_01298 | Metacyc        | CYSTEINE-DEG-PWY: L-cysteine degradation I                       |          |
| 2572232942 | t3m_01298 | Metacyc        | PWY-6328: lysine degradation X                                   |          |
| 2572232942 | t3m_01298 | Metacyc        | PWY-6682: dehydrophos biosynthesis                               |          |
| 2572232942 | t3m_01298 | Metacyc        | PWY-7000: kanamycin biosynthesis                                 |          |
| 2572232942 | t3m_01298 | Metacyc        | PWY-5748: &gamma;-coniciene and coniine biosynthesis             |          |
| 2572232942 | t3m_01298 | Metacyc        | PWY-6969: TCA cycle V (2-oxoglutarate:ferredoxin oxidoreductase) |          |
| 2572232942 | t3m_01298 | Metacyc        | LYSDEGII-PWY: lysine degradation III                             |          |
| 2572232942 | t3m_01298 | Metacyc        | PWY-3: putrescine degradation V                                  |          |
| 2572232942 | t3m_01298 | Metacyc        | PWY-6511: 3-methylarginine biosynthesis                          |          |
| 2572232942 | t3m_01298 | Metacyc        | PWY-6322: phosphinothricin tripeptide biosynthesis               |          |

|            |           |                |                                                                                   |          |
|------------|-----------|----------------|-----------------------------------------------------------------------------------|----------|
| 2572232942 | t3m_01298 | Metacyc        | PWY-7022: paromamine biosynthesis II                                              |          |
| 2572232942 | t3m_01298 | Metacyc        | PWY-6456: serinol biosynthesis                                                    |          |
| 2572232942 | t3m_01298 | Metacyc        | PWY-5826: hypoglycin biosynthesis                                                 |          |
| 2572232942 | t3m_01298 | Metacyc        | PWY-7018: paromomycin biosynthesis                                                |          |
| 2572232942 | t3m_01298 | Metacyc        | PWYQT-4471: glucosinolate biosynthesis from dihomomethionine                      |          |
| 2572232942 | t3m_01298 | Metacyc        | PWYQT-4473: glucosinolate biosynthesis from tetrahomomethionine                   |          |
| 2572232942 | t3m_01298 | Metacyc        | PWYQT-4472: glucosinolate biosynthesis from trihomomethionine                     |          |
| 2572232942 | t3m_01298 | Metacyc        | PWY-7104: dTDP-L-megosamine biosynthesis                                          |          |
| 2572232942 | t3m_01298 | Metacyc        | PWYQT-4475: glucosinolate biosynthesis from hexahomomethionine                    |          |
| 2572232942 | t3m_01298 | Metacyc        | PWY-6321: homotaurine degradation                                                 |          |
| 2572232942 | t3m_01298 | Metacyc        | P621-PWY: nylon-6 oligomer degradation                                            |          |
| 2572232942 | t3m_01298 | COG_category   | [E] Amino acid transport and metabolism                                           |          |
| 2572232942 | t3m_01298 | COG0075        | Serine-pyruvate aminotransferase/archaeal aspartate aminotransferase              | 1.00E-96 |
| 2572232942 | t3m_01298 | pfam00266      | Aminotran_5                                                                       | 2.30E-37 |
| 2572232942 | t3m_01298 | EC:2.6.1.-     | Transferases. Transferring nitrogenous groups. Transaminases (aminotransferases). |          |
| 2572232942 | t3m_01298 | KO:K00839      | aminotransferase [EC:2.6.1.-]                                                     | 0.00E+00 |
| 2572232942 | t3m_01298 | Locus_type     | CDS                                                                               |          |
| 2572232942 | t3m_01298 | Product_name   | Serine-pyruvate aminotransferase/archaeal aspartate aminotransferase              |          |
| 2572232942 | t3m_01298 | Scaffold       | t3m_contig_70_244_len_23258_read_count_1799640.30                                 |          |
| 2572232942 | t3m_01298 | Coordinates    | 13065..14201(-)                                                                   |          |
| 2572232942 | t3m_01298 | DNA_length     | 1137bp                                                                            |          |
| 2572232942 | t3m_01298 | Protein_length | 378aa                                                                             |          |
| 2572232942 | t3m_01298 | GC             |                                                                                   | 0.7      |
| 2572232943 | t3m_01299 | KEGG_module    | M00020: Serine biosynthesis, glycerate-3P => serine                               |          |
| 2572232943 | t3m_01299 | Metacyc        | SERSYN-PWY: serine biosynthesis                                                   |          |
| 2572232943 | t3m_01299 | COG_category   | [H] Coenzyme transport and metabolism                                             |          |
| 2572232943 | t3m_01299 | COG_category   | [E] Amino acid transport and metabolism                                           |          |
| 2572232943 | t3m_01299 | COG0111        | Phosphoglycerate dehydrogenase and related dehydrogenases                         | 2.00E-72 |
| 2572232943 | t3m_01299 | pfam00389      | 2-Hacid_dh                                                                        | 9.30E-31 |
| 2572232943 | t3m_01299 | pfam02826      | 2-Hacid_dh_C                                                                      | 3.80E-55 |
| 2572232943 | t3m_01299 | EC:1.1.1.95    | Phosphoglycerate dehydrogenase.                                                   |          |
| 2572232943 | t3m_01299 | TIGR01327      | D-3-phosphoglycerate dehydrogenase                                                | 4.90E-96 |
| 2572232943 | t3m_01299 | KO:K00058      | D-3-phosphoglycerate dehydrogenase [EC:1.1.1.95]                                  | 0.00E+00 |

|            |           |                |                                                                                                 |          |
|------------|-----------|----------------|-------------------------------------------------------------------------------------------------|----------|
| 2572232943 | t3m_01299 | Locus_type     | CDS                                                                                             |          |
| 2572232943 | t3m_01299 | Product_name   | Phosphoglycerate dehydrogenase and related dehydrogenases                                       |          |
| 2572232943 | t3m_01299 | Scaffold       | t3m_contig_70_244_len_23258_read_count_1799640.30                                               |          |
| 2572232943 | t3m_01299 | Coordinates    | 14198..15148(-)                                                                                 |          |
| 2572232943 | t3m_01299 | DNA_length     | 951bp                                                                                           |          |
| 2572232943 | t3m_01299 | Protein_length | 316aa                                                                                           |          |
| 2572232943 | t3m_01299 | GC             |                                                                                                 | 0.7      |
| 2572232944 | t3m_01300 | Metacyc        | PWYG-321: mycolate biosynthesis                                                                 |          |
| 2572232944 | t3m_01300 | Metacyc        | PWY-6972: oleandomycin activation/inactivation                                                  |          |
| 2572232944 | t3m_01300 | COG_category   | [R] General function prediction only                                                            |          |
| 2572232944 | t3m_01300 | COG0714        | MoxR-like ATPases                                                                               | 6.00E-67 |
| 2572232944 | t3m_01300 | pfam07726      | AAA_3                                                                                           | 1.20E-60 |
| 2572232944 | t3m_01300 | EC:3.6.3.-     | Hydrolases. Acting on acid anhydrides. Acting on acid anhydrides; catalyzing transmembrane move |          |
| 2572232944 | t3m_01300 | KO:K03924      | MoxR-like ATPase [EC:3.6.3.-]                                                                   | 0.00E+00 |
| 2572232944 | t3m_01300 | Locus_type     | CDS                                                                                             |          |
| 2572232944 | t3m_01300 | Product_name   | MoxR-like ATPases                                                                               |          |
| 2572232944 | t3m_01300 | Scaffold       | t3m_contig_70_244_len_23258_read_count_1799640.30                                               |          |
| 2572232944 | t3m_01300 | Coordinates    | 15198..16148(-)                                                                                 |          |
| 2572232944 | t3m_01300 | DNA_length     | 951bp                                                                                           |          |
| 2572232944 | t3m_01300 | Protein_length | 316aa                                                                                           |          |
| 2572232944 | t3m_01300 | GC             |                                                                                                 | 0.7      |
| 2572232945 | t3m_01301 | Locus_type     | CDS                                                                                             |          |
| 2572232945 | t3m_01301 | Product_name   | hypothetical protein                                                                            |          |
| 2572232945 | t3m_01301 | Scaffold       | t3m_contig_70_244_len_23258_read_count_1799640.30                                               |          |
| 2572232945 | t3m_01301 | Coordinates    | 16441..16959(-)                                                                                 |          |
| 2572232945 | t3m_01301 | DNA_length     | 519bp                                                                                           |          |
| 2572232945 | t3m_01301 | Protein_length | 172aa                                                                                           |          |
| 2572232945 | t3m_01301 | GC             |                                                                                                 | 0.73     |
| 2572232945 | t3m_01301 | Transmembrane  | Yes                                                                                             |          |
| 2572232946 | t3m_01302 | COG_category   | [R] General function prediction only                                                            |          |
| 2572232946 | t3m_01302 | COG1721        | Uncharacterized conserved protein (some members contain a von Wille                             | 6.00E-22 |



|            |           |                |                                   |                                                                     |          |
|------------|-----------|----------------|-----------------------------------|---------------------------------------------------------------------|----------|
| 2572232946 | t3m_01302 | pfam01882      | DUF58                             |                                                                     | 1.90E-14 |
| 2572232946 | t3m_01302 | Locus_type     |                                   | CDS                                                                 |          |
| 2572232946 | t3m_01302 | Product_name   |                                   | Uncharacterized conserved protein (some members contain a von Wille |          |
| 2572232946 | t3m_01302 | Scaffold       |                                   | t3m_contig_70_244_len_23258_read_count_1799640.30                   |          |
| 2572232946 | t3m_01302 | Coordinates    |                                   | 16959..18242(-)                                                     |          |
| 2572232946 | t3m_01302 | DNA_length     |                                   | 1284bp                                                              |          |
| 2572232946 | t3m_01302 | Protein_length |                                   | 427aa                                                               |          |
| 2572232946 | t3m_01302 | GC             |                                   |                                                                     | 0.71     |
| 2572232946 | t3m_01302 | Transmembrane  |                                   | Yes                                                                 |          |
| 2572232947 | t3m_01303 | Locus_type     |                                   | CDS                                                                 |          |
| 2572232947 | t3m_01303 | Product_name   |                                   | hypothetical protein                                                |          |
| 2572232947 | t3m_01303 | Scaffold       |                                   | t3m_contig_70_244_len_23258_read_count_1799640.30                   |          |
| 2572232947 | t3m_01303 | Coordinates    |                                   | 18239..18643(-)                                                     |          |
| 2572232947 | t3m_01303 | DNA_length     |                                   | 405bp                                                               |          |
| 2572232947 | t3m_01303 | Protein_length |                                   | 134aa                                                               |          |
| 2572232947 | t3m_01303 | GC             |                                   |                                                                     | 0.7      |
| 2572232947 | t3m_01303 | Signal_peptide |                                   | Yes                                                                 |          |
| 2572232947 | t3m_01303 | Transmembrane  |                                   | Yes                                                                 |          |
| 2572232948 | t3m_01304 | pfam13559      | DUF4129                           |                                                                     | 2.20E-07 |
| 2572232948 | t3m_01304 | Locus_type     |                                   | CDS                                                                 |          |
| 2572232948 | t3m_01304 | Product_name   |                                   | Domain of unknown function (DUF4129)                                |          |
| 2572232948 | t3m_01304 | Scaffold       |                                   | t3m_contig_70_244_len_23258_read_count_1799640.30                   |          |
| 2572232948 | t3m_01304 | Coordinates    |                                   | 18640..19557(-)                                                     |          |
| 2572232948 | t3m_01304 | DNA_length     |                                   | 918bp                                                               |          |
| 2572232948 | t3m_01304 | Protein_length |                                   | 305aa                                                               |          |
| 2572232948 | t3m_01304 | GC             |                                   |                                                                     | 0.69     |
| 2572232948 | t3m_01304 | Transmembrane  |                                   | Yes                                                                 |          |
| 2572232949 | t3m_01305 | COG_category   | [S] Function unknown              |                                                                     |          |
| 2572232949 | t3m_01305 | COG3375        | Uncharacterized conserved protein |                                                                     | 1.00E-42 |
| 2572232949 | t3m_01305 | Locus_type     |                                   | CDS                                                                 |          |
| 2572232949 | t3m_01305 | Product_name   |                                   | Uncharacterized conserved protein                                   |          |

|            |           |                |                                                                     |          |
|------------|-----------|----------------|---------------------------------------------------------------------|----------|
| 2572232949 | t3m_01305 | Scaffold       | t3m_contig_70_244_len_23258_read_count_1799640.30                   |          |
| 2572232949 | t3m_01305 | Coordinates    | 19600..20499(-)                                                     |          |
| 2572232949 | t3m_01305 | DNA_length     | 900bp                                                               |          |
| 2572232949 | t3m_01305 | Protein_length | 299aa                                                               |          |
| 2572232949 | t3m_01305 | GC             |                                                                     | 0.68     |
| 2572232950 | t3m_01306 | Locus_type     | CDS                                                                 |          |
| 2572232950 | t3m_01306 | Product_name   | hypothetical protein                                                |          |
| 2572232950 | t3m_01306 | Scaffold       | t3m_contig_70_244_len_23258_read_count_1799640.30                   |          |
| 2572232950 | t3m_01306 | Coordinates    | 20567..20989(-)                                                     |          |
| 2572232950 | t3m_01306 | DNA_length     | 423bp                                                               |          |
| 2572232950 | t3m_01306 | Protein_length | 140aa                                                               |          |
| 2572232950 | t3m_01306 | GC             |                                                                     | 0.64     |
| 2572232950 | t3m_01306 | Transmembrane  | Yes                                                                 |          |
| 2572232951 | t3m_01307 | Locus_type     | CDS                                                                 |          |
| 2572232951 | t3m_01307 | Product_name   | hypothetical protein                                                |          |
| 2572232951 | t3m_01307 | Scaffold       | t3m_contig_70_244_len_23258_read_count_1799640.30                   |          |
| 2572232951 | t3m_01307 | Coordinates    | 21063..21851(-)                                                     |          |
| 2572232951 | t3m_01307 | DNA_length     | 789bp                                                               |          |
| 2572232951 | t3m_01307 | Protein_length | 262aa                                                               |          |
| 2572232951 | t3m_01307 | GC             |                                                                     | 0.7      |
| 2572232951 | t3m_01307 | Transmembrane  | Yes                                                                 |          |
| 2572232952 | t3m_01308 | Metacyc        | PWY-6829: tRNA methylation (yeast)                                  |          |
| 2572232952 | t3m_01308 | COG_category   | [J] Translation, ribosomal structure and biogenesis                 |          |
| 2572232952 | t3m_01308 | COG2519        | tRNA(1-methyladenosine) methyltransferase and related methyltransfe | 6.00E-61 |
| 2572232952 | t3m_01308 | pfam08704      | GCD14                                                               | 1.50E-26 |
| 2572232952 | t3m_01308 | EC:2.1.1.220   | tRNA (adenine(58)-N(1))-methyltransferase.                          |          |
| 2572232952 | t3m_01308 | EC:2.1.1.219   | tRNA (adenine(57)-N(1)/adenine(58)-N(1))-methyltransferase.         |          |
| 2572232952 | t3m_01308 | KO:K07442      | tRNA (adenine57-N1/adenine58-N1)-methyltransferase [EC:2.1.1.219 2  | 4.20E-45 |
| 2572232952 | t3m_01308 | ITERM:00706    | tRNA (adenine-57, 58-N(1)-) methyltransferase (EC 2.1.1.-)          |          |
| 2572232952 | t3m_01308 | Locus_type     | CDS                                                                 |          |
| 2572232952 | t3m_01308 | Product_name   | tRNA (adenine-57, 58-N(1)-) methyltransferase (EC 2.1.1.-)          |          |

|            |           |                |                                                         |          |
|------------|-----------|----------------|---------------------------------------------------------|----------|
| 2572232952 | t3m_01308 | Scaffold       | t3m_contig_70_244_len_23258_read_count_1799640.30       |          |
| 2572232952 | t3m_01308 | Coordinates    | 21854..22642(-)                                         |          |
| 2572232952 | t3m_01308 | DNA_length     | 789bp                                                   |          |
| 2572232952 | t3m_01308 | Protein_length | 262aa                                                   |          |
| 2572232952 | t3m_01308 | GC             |                                                         | 0.73     |
|            |           |                |                                                         |          |
| 2572232953 | t3m_01309 | Locus_type     | CDS                                                     |          |
| 2572232953 | t3m_01309 | Product_name   | hypothetical protein                                    |          |
| 2572232953 | t3m_01309 | Scaffold       | t3m_contig_70_244_len_23258_read_count_1799640.30       |          |
| 2572232953 | t3m_01309 | Coordinates    | 22739..23185(+)                                         |          |
| 2572232953 | t3m_01309 | DNA_length     | 447bp                                                   |          |
| 2572232953 | t3m_01309 | Protein_length | 148aa                                                   |          |
| 2572232953 | t3m_01309 | GC             |                                                         | 0.64     |
|            |           |                |                                                         |          |
| 2572232954 | t3m_01310 | Locus_type     | CDS                                                     |          |
| 2572232954 | t3m_01310 | Product_name   | hypothetical protein                                    |          |
| 2572232954 | t3m_01310 | Scaffold       | t3m_contig_70_255_len_22838_read_count_1766313.31       |          |
| 2572232954 | t3m_01310 | Coordinates    | 183..422(-)                                             |          |
| 2572232954 | t3m_01310 | DNA_length     | 240bp                                                   |          |
| 2572232954 | t3m_01310 | Protein_length | 79aa                                                    |          |
| 2572232954 | t3m_01310 | GC             |                                                         | 0.68     |
|            |           |                |                                                         |          |
| 2572232955 | t3m_01311 | KEGG_module    | M00248: Putative antibiotic transport system            |          |
| 2572232955 | t3m_01311 | COG_category   | [V] Defense mechanisms                                  |          |
| 2572232955 | t3m_01311 | COG0842        | ABC-type multidrug transport system, permease component | 9.00E-08 |
| 2572232955 | t3m_01311 | pfam01061      | ABC2_membrane                                           | 1.80E-15 |
| 2572232955 | t3m_01311 | KO:K09686      | antibiotic transport system permease protein            | 0.00E+00 |
| 2572232955 | t3m_01311 | Locus_type     | CDS                                                     |          |
| 2572232955 | t3m_01311 | Product_name   | ABC-type multidrug transport system, permease component |          |
| 2572232955 | t3m_01311 | Scaffold       | t3m_contig_70_255_len_22838_read_count_1766313.31       |          |
| 2572232955 | t3m_01311 | Coordinates    | 507..1256(-)                                            |          |
| 2572232955 | t3m_01311 | DNA_length     | 750bp                                                   |          |
| 2572232955 | t3m_01311 | Protein_length | 249aa                                                   |          |
| 2572232955 | t3m_01311 | GC             |                                                         | 0.67     |

|            |           |                |                                                                         |           |
|------------|-----------|----------------|-------------------------------------------------------------------------|-----------|
| 2572232955 | t3m_01311 | Transmembrane  | Yes                                                                     |           |
| 2572232956 | t3m_01312 | KEGG_module    | M00254: ABC-2 type transport system                                     |           |
| 2572232956 | t3m_01312 | COG_category   | [V] Defense mechanisms                                                  |           |
| 2572232956 | t3m_01312 | COG1131        | ABC-type multidrug transport system, ATPase component                   | 4.00E-63  |
| 2572232956 | t3m_01312 | pfam00005      | ABC_tran                                                                | 1.10E-25  |
| 2572232956 | t3m_01312 | KO:K01990      | ABC-2 type transport system ATP-binding protein                         | 0.00E+00  |
| 2572232956 | t3m_01312 | Locus_type     | CDS                                                                     |           |
| 2572232956 | t3m_01312 | Product_name   | ABC-type multidrug transport system, ATPase component                   |           |
| 2572232956 | t3m_01312 | Scaffold       | t3m_contig_70_255_len_22838_read_count_1766313.31                       |           |
| 2572232956 | t3m_01312 | Coordinates    | 1253..2215(-)                                                           |           |
| 2572232956 | t3m_01312 | DNA_length     | 963bp                                                                   |           |
| 2572232956 | t3m_01312 | Protein_length | 320aa                                                                   |           |
| 2572232956 | t3m_01312 | GC             |                                                                         | 0.67      |
| 2572232957 | t3m_01313 | KEGG_module    | M00048: Inosine monophosphate biosynthesis, PRPP + glutamine => IMP     |           |
| 2572232957 | t3m_01313 | Metacyc        | PWY-6720: toyocamycin biosynthesis                                      |           |
| 2572232957 | t3m_01313 | COG_category   | [R] General function prediction only                                    |           |
| 2572232957 | t3m_01313 | COG1759        | ATP-utilizing enzymes of ATP-grasp superfamily (probably carboligases)  | 2.00E-100 |
| 2572232957 | t3m_01313 | pfam06849      | DUF1246                                                                 | 7.40E-37  |
| 2572232957 | t3m_01313 | pfam06973      | DUF1297                                                                 | 2.40E-59  |
| 2572232957 | t3m_01313 | EC:6.3.4.-     | Ligases. Forming carbon-nitrogen bonds. Other carbon--nitrogen ligases. |           |
| 2572232957 | t3m_01313 | KO:K06863      | 5-formaminoimidazole-4-carboxamide-1-(beta)-D-ribofuranosyl 5'-mon      | 0.00E+00  |
| 2572232957 | t3m_01313 | Locus_type     | CDS                                                                     |           |
| 2572232957 | t3m_01313 | Product_name   | ATP-utilizing enzymes of ATP-grasp superfamily (probably carboligases)  |           |
| 2572232957 | t3m_01313 | Scaffold       | t3m_contig_70_255_len_22838_read_count_1766313.31                       |           |
| 2572232957 | t3m_01313 | Coordinates    | 2270..3337(-)                                                           |           |
| 2572232957 | t3m_01313 | DNA_length     | 1068bp                                                                  |           |
| 2572232957 | t3m_01313 | Protein_length | 355aa                                                                   |           |
| 2572232957 | t3m_01313 | GC             |                                                                         | 0.68      |
| 2572232958 | t3m_01314 | COG_category   | [L] Replication, recombination and repair                               |           |
| 2572232958 | t3m_01314 | COG2887        | RecB family exonuclease                                                 | 2.00E-07  |
| 2572232958 | t3m_01314 | pfam12705      | PDDEXK_1                                                                | 3.90E-40  |

|            |           |                |                                                                               |          |
|------------|-----------|----------------|-------------------------------------------------------------------------------|----------|
| 2572232958 | t3m_01314 | Locus_type     | CDS                                                                           |          |
| 2572232958 | t3m_01314 | Product_name   | RecB family exonuclease                                                       |          |
| 2572232958 | t3m_01314 | Scaffold       | t3m_contig_70_255_len_22838_read_count_1766313.31                             |          |
| 2572232958 | t3m_01314 | Coordinates    | 3388..4608(-)                                                                 |          |
| 2572232958 | t3m_01314 | DNA_length     | 1221bp                                                                        |          |
| 2572232958 | t3m_01314 | Protein_length | 406aa                                                                         |          |
| 2572232958 | t3m_01314 | GC             |                                                                               | 0.71     |
| 2572232959 | t3m_01315 | COG_category   | [K] Transcription                                                             |          |
| 2572232959 | t3m_01315 | COG1405        | Transcription initiation factor TFIIIB, Brf1 subunit/Transcription initiatio  | 1.00E-69 |
| 2572232959 | t3m_01315 | pfam08271      | TF_Zn_Ribbon                                                                  | 3.80E-12 |
| 2572232959 | t3m_01315 | pfam00382      | TFIIB                                                                         | 3.90E-11 |
| 2572232959 | t3m_01315 | pfam00382      | TFIIB                                                                         | 1.40E-16 |
| 2572232959 | t3m_01315 | KO:K03124      | transcription initiation factor TFIIIB                                        | 0.00E+00 |
| 2572232959 | t3m_01315 | Locus_type     | CDS                                                                           |          |
| 2572232959 | t3m_01315 | Product_name   | Transcription initiation factor TFIIIB, Brf1 subunit/Transcription initiation |          |
| 2572232959 | t3m_01315 | Scaffold       | t3m_contig_70_255_len_22838_read_count_1766313.31                             |          |
| 2572232959 | t3m_01315 | Coordinates    | 4656..5711(-)                                                                 |          |
| 2572232959 | t3m_01315 | DNA_length     | 1056bp                                                                        |          |
| 2572232959 | t3m_01315 | Protein_length | 351aa                                                                         |          |
| 2572232959 | t3m_01315 | GC             |                                                                               | 0.69     |
| 2572232960 | t3m_01316 | COG_category   | [K] Transcription                                                             |          |
| 2572232960 | t3m_01316 | COG1378        | Predicted transcriptional regulators                                          | 2.00E-17 |
| 2572232960 | t3m_01316 | pfam11495      | Regulator_TrmB                                                                | 3.10E-05 |
| 2572232960 | t3m_01316 | pfam01978      | TrmB                                                                          | 1.20E-08 |
| 2572232960 | t3m_01316 | Locus_type     | CDS                                                                           |          |
| 2572232960 | t3m_01316 | Product_name   | Predicted transcriptional regulators                                          |          |
| 2572232960 | t3m_01316 | Scaffold       | t3m_contig_70_255_len_22838_read_count_1766313.31                             |          |
| 2572232960 | t3m_01316 | Coordinates    | 5870..7144(-)                                                                 |          |
| 2572232960 | t3m_01316 | DNA_length     | 1275bp                                                                        |          |
| 2572232960 | t3m_01316 | Protein_length | 424aa                                                                         |          |
| 2572232960 | t3m_01316 | GC             |                                                                               | 0.7      |

|            |           |                |                                                     |          |
|------------|-----------|----------------|-----------------------------------------------------|----------|
| 2572232961 | t3m_01317 | KEGG_module    | M00179: Ribosome, archaea                           |          |
| 2572232961 | t3m_01317 | KEGG_module    | M00178: Ribosome, bacteria                          |          |
| 2572232961 | t3m_01317 | COG_category   | [J] Translation, ribosomal structure and biogenesis |          |
| 2572232961 | t3m_01317 | COG0052        | Ribosomal protein S2                                | 9.00E-44 |
| 2572232961 | t3m_01317 | pfam00318      | Ribosomal_S2                                        | 2.40E-17 |
| 2572232961 | t3m_01317 | pfam00318      | Ribosomal_S2                                        | 6.30E-18 |
| 2572232961 | t3m_01317 | TIGR01012      | ribosomal protein Sa(cytosolic)/S2(archaeal)        | 6.80E-81 |
| 2572232961 | t3m_01317 | KO:K02967      | small subunit ribosomal protein S2                  | 0.00E+00 |
| 2572232961 | t3m_01317 | Locus_type     | CDS                                                 |          |
| 2572232961 | t3m_01317 | Product_name   | ribosomal protein Sa(cytosolic)/S2(archaeal)        |          |
| 2572232961 | t3m_01317 | Scaffold       | t3m_contig_70_255_len_22838_read_count_1766313.31   |          |
| 2572232961 | t3m_01317 | Coordinates    | 7219..7917(-)                                       |          |
| 2572232961 | t3m_01317 | DNA_length     | 699bp                                               |          |
| 2572232961 | t3m_01317 | Protein_length | 232aa                                               |          |
| 2572232961 | t3m_01317 | GC             |                                                     | 0.67     |

|            |           |             |                                                                            |  |
|------------|-----------|-------------|----------------------------------------------------------------------------|--|
| 2572232962 | t3m_01318 | KEGG_module | M00346: Formaldehyde assimilation, serine pathway                          |  |
| 2572232962 | t3m_01318 | KEGG_module | M00002: Glycolysis, core module involving three-carbon compounds           |  |
| 2572232962 | t3m_01318 | KEGG_module | M00003: Gluconeogenesis, oxaloacetate => fructose-6P                       |  |
| 2572232962 | t3m_01318 | KEGG_module | M00394: RNA degradosome                                                    |  |
| 2572232962 | t3m_01318 | KEGG_module | M00001: Glycolysis (Embden-Meyerhof pathway), glucose => pyruvate          |  |
| 2572232962 | t3m_01318 | Metacyc     | ANARESP1-PWY: respiration (anaerobic)                                      |  |
| 2572232962 | t3m_01318 | Metacyc     | PWY-6142: gluconeogenesis II (<i>Methanobacterium thermoautotrophicum</i>) |  |
| 2572232962 | t3m_01318 | Metacyc     | GLUCONEO-PWY: gluconeogenesis I                                            |  |
| 2572232962 | t3m_01318 | Metacyc     | PWY-5723: Rubisco shunt                                                    |  |
| 2572232962 | t3m_01318 | Metacyc     | PWY-7124: ethylene biosynthesis V                                          |  |
| 2572232962 | t3m_01318 | Metacyc     | PWY-1042: glycolysis IV (plant cytosol)                                    |  |
| 2572232962 | t3m_01318 | Metacyc     | GLYCOLYSIS: glycolysis I                                                   |  |
| 2572232962 | t3m_01318 | Metacyc     | P124-PWY: Bifidobacterium shunt                                            |  |
| 2572232962 | t3m_01318 | Metacyc     | PWY-2221: Entner-Doudoroff pathway III (semi-phosphorylative)              |  |
| 2572232962 | t3m_01318 | Metacyc     | PWY-1622: formaldehyde assimilation I (serine pathway)                     |  |
| 2572232962 | t3m_01318 | Metacyc     | PWY-6886: 1-butanol autotrophic biosynthesis                               |  |
| 2572232962 | t3m_01318 | Metacyc     | P122-PWY: heterolactic fermentation                                        |  |
| 2572232962 | t3m_01318 | Metacyc     | PWY-6901: xylose degradation IV                                            |  |

|            |           |                |                                                                         |           |
|------------|-----------|----------------|-------------------------------------------------------------------------|-----------|
| 2572232962 | t3m_01318 | Metacyc        | NPGLUCAT-PWY: Entner-Doudoroff pathway II (non-phosphorylative)         |           |
| 2572232962 | t3m_01318 | Metacyc        | PWY-7003: glycerol degradation to butanol                               |           |
| 2572232962 | t3m_01318 | Metacyc        | P341-PWY: glycolysis V (Pyrococcus)                                     |           |
| 2572232962 | t3m_01318 | Metacyc        | PWY-5484: glycolysis II (from fructose-6P)                              |           |
| 2572232962 | t3m_01318 | Metacyc        | ANAGLYCOLYSIS-PWY: glycolysis III (glucokinase)                         |           |
| 2572232962 | t3m_01318 | COG_category   | [G] Carbohydrate transport and metabolism                               |           |
| 2572232962 | t3m_01318 | COG0148        | Enolase                                                                 | 3.00E-103 |
| 2572232962 | t3m_01318 | pfam00113      | Enolase_C                                                               | 9.70E-53  |
| 2572232962 | t3m_01318 | pfam03952      | Enolase_N                                                               | 3.60E-32  |
| 2572232962 | t3m_01318 | EC:4.2.1.11    | Phosphopyruvate hydratase.                                              |           |
| 2572232962 | t3m_01318 | TIGR01060      | phosphopyruvate hydratase                                               | 8.50E-106 |
| 2572232962 | t3m_01318 | KO:K01689      | enolase [EC:4.2.1.11]                                                   | 0.00E+00  |
| 2572232962 | t3m_01318 | Locus_type     | CDS                                                                     |           |
| 2572232962 | t3m_01318 | Product_name   | Enolase                                                                 |           |
| 2572232962 | t3m_01318 | Scaffold       | t3m_contig_70_255_len_22838_read_count_1766313.31                       |           |
| 2572232962 | t3m_01318 | Coordinates    | 7880..9094(-)                                                           |           |
| 2572232962 | t3m_01318 | DNA_length     | 1215bp                                                                  |           |
| 2572232962 | t3m_01318 | Protein_length | 404aa                                                                   |           |
| 2572232962 | t3m_01318 | GC             |                                                                         | 0.69      |
| 2572232963 | t3m_01319 | KEGG_module    | M00376: 3-Hydroxypropionate bicycle                                     |           |
| 2572232963 | t3m_01319 | KEGG_module    | M00375: Hydroxypropionate-hydroxybutylate cycle                         |           |
| 2572232963 | t3m_01319 | KEGG_module    | M00373: Ethylmalonyl pathway                                            |           |
| 2572232963 | t3m_01319 | Metacyc        | PWY-5743: 3-hydroxypropionate cycle                                     |           |
| 2572232963 | t3m_01319 | Metacyc        | P108-PWY: pyruvate fermentation to propionate I                         |           |
| 2572232963 | t3m_01319 | Metacyc        | PROPIONMET-PWY: methylmalonyl pathway                                   |           |
| 2572232963 | t3m_01319 | Metacyc        | PWY-6728: methylaspartate cycle                                         |           |
| 2572232963 | t3m_01319 | Metacyc        | PWY-5789: 3-hydroxypropionate/4-hydroxybutyrate cycle                   |           |
| 2572232963 | t3m_01319 | IMG_pathway    | 370: Oxaloacetate conversion to propionate via methylmalonyl-CoA        |           |
| 2572232963 | t3m_01319 | IMG_pathway    | 525: Hydroxypropionate cycle                                            |           |
| 2572232963 | t3m_01319 | IMG_pathway    | 596: 3-hydroxypropionate/4-hydroxybutyrate cycle                        |           |
| 2572232963 | t3m_01319 | IMG_pathway    | 837: Propionyl-CoA conversion to succinyl-CoA via methylmalonyl pathway |           |
| 2572232963 | t3m_01319 | IMG_pathway    | 962: Glyoxylate from acetyl-CoA via ethylmalonyl-CoA pathway            |           |
| 2572232963 | t3m_01319 | pfam13669      | Glyoxalase_4                                                            | 2.40E-20  |

|            |           |                |                                                            |          |
|------------|-----------|----------------|------------------------------------------------------------|----------|
| 2572232963 | t3m_01319 | EC:5.1.99.1    | Methylmalonyl-CoA epimerase.                               |          |
| 2572232963 | t3m_01319 | TIGR03081      | methylmalonyl-CoA epimerase                                | 1.10E-38 |
| 2572232963 | t3m_01319 | KO:K05606      | methylmalonyl-CoA/ethylmalonyl-CoA epimerase [EC:5.1.99.1] | 5.00E-30 |
| 2572232963 | t3m_01319 | ITERM:01586    | methylmalonyl-CoA epimerase (EC 5.1.99.1)                  |          |
| 2572232963 | t3m_01319 | Locus_type     | CDS                                                        |          |
| 2572232963 | t3m_01319 | Product_name   | methylmalonyl-CoA epimerase (EC 5.1.99.1)                  |          |
| 2572232963 | t3m_01319 | Scaffold       | t3m_contig_70_255_len_22838_read_count_1766313.31          |          |
| 2572232963 | t3m_01319 | Coordinates    | 9091..9489(-)                                              |          |
| 2572232963 | t3m_01319 | DNA_length     | 399bp                                                      |          |
| 2572232963 | t3m_01319 | Protein_length | 132aa                                                      |          |
| 2572232963 | t3m_01319 | GC             |                                                            | 0.7      |
| 2572232964 | t3m_01320 | KEGG_module    | M00376: 3-Hydroxypropionate bicycle                        |          |
| 2572232964 | t3m_01320 | KEGG_module    | M00375: Hydroxypropionate-hydroxybutylate cycle            |          |
| 2572232964 | t3m_01320 | Metacyc        | PWY0-43: conversion of succinate to propionate             |          |
| 2572232964 | t3m_01320 | Metacyc        | P108-PWY: pyruvate fermentation to propionate I            |          |
| 2572232964 | t3m_01320 | Metacyc        | PROPIONMET-PWY: methylmalonyl pathway                      |          |
| 2572232964 | t3m_01320 | Metacyc        | PWY-6728: methylaspartate cycle                            |          |
| 2572232964 | t3m_01320 | Metacyc        | PWY-5743: 3-hydroxypropionate cycle                        |          |
| 2572232964 | t3m_01320 | Metacyc        | PWY-5789: 3-hydroxypropionate/4-hydroxybutyrate cycle      |          |
| 2572232964 | t3m_01320 | COG_category   | [I] Lipid transport and metabolism                         |          |
| 2572232964 | t3m_01320 | COG1884        | Methylmalonyl-CoA mutase, N-terminal domain/subunit        | 0.00E+00 |
| 2572232964 | t3m_01320 | pfam01642      | MM_CoA_mutase                                              | 0.00E+00 |
| 2572232964 | t3m_01320 | EC:5.4.99.2    | Methylmalonyl-CoA mutase.                                  |          |
| 2572232964 | t3m_01320 | TIGR00641      | methylmalonyl-CoA mutase N-terminal domain                 | 0.00E+00 |
| 2572232964 | t3m_01320 | KO:K01848      | methylmalonyl-CoA mutase, N-terminal domain [EC:5.4.99.2]  | 0.00E+00 |
| 2572232964 | t3m_01320 | Locus_type     | CDS                                                        |          |
| 2572232964 | t3m_01320 | Product_name   | methylmalonyl-CoA mutase (EC 5.4.99.2)                     |          |
| 2572232964 | t3m_01320 | Scaffold       | t3m_contig_70_255_len_22838_read_count_1766313.31          |          |
| 2572232964 | t3m_01320 | Coordinates    | 9498..11177(-)                                             |          |
| 2572232964 | t3m_01320 | DNA_length     | 1680bp                                                     |          |
| 2572232964 | t3m_01320 | Protein_length | 559aa                                                      |          |
| 2572232964 | t3m_01320 | GC             |                                                            | 0.69     |



|            |           |                |                                                           |          |
|------------|-----------|----------------|-----------------------------------------------------------|----------|
| 2572232965 | t3m_01321 | KEGG_module    | M00359: Aminoacyl-tRNA biosynthesis, eukaryotes           |          |
| 2572232965 | t3m_01321 | KEGG_module    | M00360: Aminoacyl-tRNA biosynthesis, prokaryotes          |          |
| 2572232965 | t3m_01321 | Metacyc        | TRNA-CHARGING-PWY: tRNA charging                          |          |
| 2572232965 | t3m_01321 | COG_category   | [J] Translation, ribosomal structure and biogenesis       |          |
| 2572232965 | t3m_01321 | COG0072        | Phenylalanyl-tRNA synthetase beta subunit                 | 9.00E-58 |
| 2572232965 | t3m_01321 | pfam03484      | B5                                                        | 7.30E-06 |
| 2572232965 | t3m_01321 | EC:6.1.1.20    | Phenylalanine--tRNA ligase.                               |          |
| 2572232965 | t3m_01321 | KO:K01890      | phenylalanyl-tRNA synthetase beta chain [EC:6.1.1.20]     | 0.00E+00 |
| 2572232965 | t3m_01321 | ITERM:00403    | phenylalanyl-tRNA synthetase beta subunit (EC 6.1.1.20)   |          |
| 2572232965 | t3m_01321 | Locus_type     | CDS                                                       |          |
| 2572232965 | t3m_01321 | Product_name   | phenylalanyl-tRNA synthetase beta subunit (EC 6.1.1.20)   |          |
| 2572232965 | t3m_01321 | Scaffold       | t3m_contig_70_255_len_22838_read_count_1766313.31         |          |
| 2572232965 | t3m_01321 | Coordinates    | 11201..12895(-)                                           |          |
| 2572232965 | t3m_01321 | DNA_length     | 1695bp                                                    |          |
| 2572232965 | t3m_01321 | Protein_length | 564aa                                                     |          |
| 2572232965 | t3m_01321 | GC             |                                                           | 0.71     |
|            |           |                |                                                           |          |
| 2572232966 | t3m_01322 | KEGG_module    | M00359: Aminoacyl-tRNA biosynthesis, eukaryotes           |          |
| 2572232966 | t3m_01322 | KEGG_module    | M00360: Aminoacyl-tRNA biosynthesis, prokaryotes          |          |
| 2572232966 | t3m_01322 | Metacyc        | TRNA-CHARGING-PWY: tRNA charging                          |          |
| 2572232966 | t3m_01322 | COG_category   | [J] Translation, ribosomal structure and biogenesis       |          |
| 2572232966 | t3m_01322 | COG0016        | Phenylalanyl-tRNA synthetase alpha subunit                | 6.00E-72 |
| 2572232966 | t3m_01322 | pfam01409      | tRNA-synt_2d                                              | 2.40E-73 |
| 2572232966 | t3m_01322 | EC:6.1.1.20    | Phenylalanine--tRNA ligase.                               |          |
| 2572232966 | t3m_01322 | TIGR00468      | phenylalanyl-tRNA synthetase, alpha subunit               | 1.30E-84 |
| 2572232966 | t3m_01322 | KO:K01889      | phenylalanyl-tRNA synthetase alpha chain [EC:6.1.1.20]    | 0.00E+00 |
| 2572232966 | t3m_01322 | ITERM:01968    | phenylalanyl-tRNA synthetase, alpha subunit (EC 6.1.1.20) |          |
| 2572232966 | t3m_01322 | Locus_type     | CDS                                                       |          |
| 2572232966 | t3m_01322 | Product_name   | phenylalanyl-tRNA synthetase, alpha subunit (EC 6.1.1.20) |          |
| 2572232966 | t3m_01322 | Scaffold       | t3m_contig_70_255_len_22838_read_count_1766313.31         |          |
| 2572232966 | t3m_01322 | Coordinates    | 12898..14427(-)                                           |          |
| 2572232966 | t3m_01322 | DNA_length     | 1530bp                                                    |          |
| 2572232966 | t3m_01322 | Protein_length | 509aa                                                     |          |
| 2572232966 | t3m_01322 | GC             |                                                           | 0.7      |

|            |           |                |                                                                    |                                                                    |          |
|------------|-----------|----------------|--------------------------------------------------------------------|--------------------------------------------------------------------|----------|
| 2572232967 | t3m_01323 | pfam09286      | Pro-kuma_activ                                                     |                                                                    | 1.50E-06 |
| 2572232967 | t3m_01323 | Locus_type     |                                                                    | CDS                                                                |          |
| 2572232967 | t3m_01323 | Product_name   |                                                                    | Pro-kumamolisin, activation domain                                 |          |
| 2572232967 | t3m_01323 | Scaffold       |                                                                    | t3m_contig_70_255_len_22838_read_count_1766313.31                  |          |
| 2572232967 | t3m_01323 | Coordinates    |                                                                    | 14279..16909(-)                                                    |          |
| 2572232967 | t3m_01323 | DNA_length     |                                                                    | 2631bp                                                             |          |
| 2572232967 | t3m_01323 | Protein_length |                                                                    | 876aa                                                              |          |
| 2572232967 | t3m_01323 | GC             |                                                                    |                                                                    | 0.71     |
| 2572232967 | t3m_01323 | Transmembrane  |                                                                    | Yes                                                                |          |
| 2572232968 | t3m_01324 | Metacyc        | GLUTSYN-PWY: glutamate biosynthesis I                              |                                                                    |          |
| 2572232968 | t3m_01324 | Metacyc        | PWY-6963: ammonia assimilation cycle I                             |                                                                    |          |
| 2572232968 | t3m_01324 | Metacyc        | GLUGLNSYN-PWY: glutamate biosynthesis IV                           |                                                                    |          |
| 2572232968 | t3m_01324 | Metacyc        | GLUTAMINEFUM-PWY: glutamine degradation II                         |                                                                    |          |
| 2572232968 | t3m_01324 | COG_category   | [E] Amino acid transport and metabolism                            |                                                                    |          |
| 2572232968 | t3m_01324 | COG_category   | [R] General function prediction only                               |                                                                    |          |
| 2572232968 | t3m_01324 | COG0493        | NADPH-dependent glutamate synthase beta chain and related oxidorec |                                                                    | 1.00E-76 |
| 2572232968 | t3m_01324 | pfam07992      | Pyr_redox_2                                                        |                                                                    | 1.70E-09 |
| 2572232968 | t3m_01324 | pfam14691      | Fer4_20                                                            |                                                                    | 1.40E-25 |
| 2572232968 | t3m_01324 | EC:1.4.1.13    | Glutamate synthase (NADPH).                                        |                                                                    |          |
| 2572232968 | t3m_01324 | EC:1.4.1.14    | Glutamate synthase (NADH).                                         |                                                                    |          |
| 2572232968 | t3m_01324 | KO:K00266      | glutamate synthase (NADPH/NADH) small chain [EC:1.4.1.13 1.4.1.14] |                                                                    | 0.00E+00 |
| 2572232968 | t3m_01324 | Locus_type     |                                                                    | CDS                                                                |          |
| 2572232968 | t3m_01324 | Product_name   |                                                                    | NADPH-dependent glutamate synthase beta chain and related oxidorec |          |
| 2572232968 | t3m_01324 | Scaffold       |                                                                    | t3m_contig_70_255_len_22838_read_count_1766313.31                  |          |
| 2572232968 | t3m_01324 | Coordinates    |                                                                    | 16977..18440(-)                                                    |          |
| 2572232968 | t3m_01324 | DNA_length     |                                                                    | 1464bp                                                             |          |
| 2572232968 | t3m_01324 | Protein_length |                                                                    | 487aa                                                              |          |
| 2572232968 | t3m_01324 | GC             |                                                                    |                                                                    | 0.69     |
| 2572232969 | t3m_01325 | KEGG_module    | M00335: Sec (secretion) system                                     |                                                                    |          |
| 2572232969 | t3m_01325 | COG_category   | [U] Intracellular trafficking, secretion, and vesicular transport  |                                                                    |          |
| 2572232969 | t3m_01325 | COG0541        | Signal recognition particle GTPase                                 |                                                                    | 0.00E+00 |

|            |           |                |                                                        |      |          |
|------------|-----------|----------------|--------------------------------------------------------|------|----------|
| 2572232969 | t3m_01325 | pfam02881      | SRP54_N                                                |      | 5.00E-14 |
| 2572232969 | t3m_01325 | pfam02978      | SRP_SPB                                                |      | 6.40E-28 |
| 2572232969 | t3m_01325 | pfam00448      | SRP54                                                  |      | 6.70E-66 |
| 2572232969 | t3m_01325 | KO:K03106      | signal recognition particle subunit SRP54              |      | 0.00E+00 |
| 2572232969 | t3m_01325 | ITERM:01969    | signal recognition particle subunit FFH/SRP54 (srp54)  |      |          |
| 2572232969 | t3m_01325 | Locus_type     | CDS                                                    |      |          |
| 2572232969 | t3m_01325 | Product_name   | signal recognition particle subunit FFH/SRP54 (srp54)  |      |          |
| 2572232969 | t3m_01325 | Scaffold       | t3m_contig_70_255_len_22838_read_count_1766313.31      |      |          |
| 2572232969 | t3m_01325 | Coordinates    | 18592..19932(+)                                        |      |          |
| 2572232969 | t3m_01325 | DNA_length     | 1341bp                                                 |      |          |
| 2572232969 | t3m_01325 | Protein_length | 446aa                                                  |      |          |
| 2572232969 | t3m_01325 | GC             |                                                        | 0.69 |          |
| 2572232970 | t3m_01326 | pfam07760      | DUF1616                                                |      | 2.00E-11 |
| 2572232970 | t3m_01326 | Locus_type     | CDS                                                    |      |          |
| 2572232970 | t3m_01326 | Product_name   | Protein of unknown function (DUF1616)                  |      |          |
| 2572232970 | t3m_01326 | Scaffold       | t3m_contig_70_255_len_22838_read_count_1766313.31      |      |          |
| 2572232970 | t3m_01326 | Coordinates    | 19949..20491(+)                                        |      |          |
| 2572232970 | t3m_01326 | DNA_length     | 543bp                                                  |      |          |
| 2572232970 | t3m_01326 | Protein_length | 180aa                                                  |      |          |
| 2572232970 | t3m_01326 | GC             |                                                        | 0.69 |          |
| 2572232970 | t3m_01326 | Transmembrane  | Yes                                                    |      |          |
| 2572232971 | t3m_01327 | Metacyc        | PWY490-4: asparagine biosynthesis III (tRNA-dependent) |      |          |
| 2572232971 | t3m_01327 | COG_category   | [S] Function unknown                                   |      |          |
| 2572232971 | t3m_01327 | COG1990        | Uncharacterized conserved protein                      |      | 6.00E-24 |
| 2572232971 | t3m_01327 | pfam01981      | PTH2                                                   |      | 5.40E-36 |
| 2572232971 | t3m_01327 | EC:3.1.1.29    | Aminoacyl-tRNA hydrolase.                              |      |          |
| 2572232971 | t3m_01327 | TIGR00283      | peptidyl-tRNA hydrolase                                |      | 3.20E-35 |
| 2572232971 | t3m_01327 | KO:K04794      | peptidyl-tRNA hydrolase, PTH2 family [EC:3.1.1.29]     |      | 6.70E-24 |
| 2572232971 | t3m_01327 | Locus_type     | CDS                                                    |      |          |
| 2572232971 | t3m_01327 | Product_name   | peptidyl-tRNA hydrolase (EC 3.1.1.29)                  |      |          |
| 2572232971 | t3m_01327 | Scaffold       | t3m_contig_70_255_len_22838_read_count_1766313.31      |      |          |
| 2572232971 | t3m_01327 | Coordinates    | 20520..20861(+)                                        |      |          |

|            |           |                |                                                                       |          |
|------------|-----------|----------------|-----------------------------------------------------------------------|----------|
| 2572232971 | t3m_01327 | DNA_length     | 342bp                                                                 |          |
| 2572232971 | t3m_01327 | Protein_length | 113aa                                                                 |          |
| 2572232971 | t3m_01327 | GC             |                                                                       | 0.72     |
| 2572232972 | t3m_01328 | KEGG_module    | M00239: Peptides/nickel transport system                              |          |
| 2572232972 | t3m_01328 | COG_category   | [E] Amino acid transport and metabolism                               |          |
| 2572232972 | t3m_01328 | COG_category   | [P] Inorganic ion transport and metabolism                            |          |
| 2572232972 | t3m_01328 | COG0601        | ABC-type dipeptide/oligopeptide/nickel transport systems, permease co | 1.00E-59 |
| 2572232972 | t3m_01328 | pfam00528      | BPD_transp_1                                                          | 4.40E-32 |
| 2572232972 | t3m_01328 | KO:K02033      | peptide/nickel transport system permease protein                      | 0.00E+00 |
| 2572232972 | t3m_01328 | Locus_type     | CDS                                                                   |          |
| 2572232972 | t3m_01328 | Product_name   | ABC-type dipeptide/oligopeptide/nickel transport systems, permease co |          |
| 2572232972 | t3m_01328 | Scaffold       | t3m_contig_70_255_len_22838_read_count_1766313.31                     |          |
| 2572232972 | t3m_01328 | Coordinates    | 20969..22177(+)                                                       |          |
| 2572232972 | t3m_01328 | DNA_length     | 1209bp                                                                |          |
| 2572232972 | t3m_01328 | Protein_length | 402aa                                                                 |          |
| 2572232972 | t3m_01328 | GC             |                                                                       | 0.59     |
| 2572232972 | t3m_01328 | Transmembrane  | Yes                                                                   |          |
| 2572232973 | t3m_01329 | pfam12911      | OppC_N                                                                | 2.50E-08 |
| 2572232973 | t3m_01329 | Locus_type     | CDS                                                                   |          |
| 2572232973 | t3m_01329 | Product_name   | N-terminal TM domain of oligopeptide transport permease C             |          |
| 2572232973 | t3m_01329 | Scaffold       | t3m_contig_70_255_len_22838_read_count_1766313.31                     |          |
| 2572232973 | t3m_01329 | Coordinates    | 22199..22837(+)                                                       |          |
| 2572232973 | t3m_01329 | DNA_length     | 639bp                                                                 |          |
| 2572232973 | t3m_01329 | Protein_length | 213aa                                                                 |          |
| 2572232973 | t3m_01329 | GC             |                                                                       | 0.65     |
| 2572232973 | t3m_01329 | Transmembrane  | Yes                                                                   |          |
| 2572232974 | t3m_01330 | COG_category   | [J] Translation, ribosomal structure and biogenesis                   |          |
| 2572232974 | t3m_01330 | COG5256        | Translation elongation factor EF-1alpha (GTPase)                      | 0.00E+00 |
| 2572232974 | t3m_01330 | pfam00009      | GTP_EFTU                                                              | 1.10E-58 |
| 2572232974 | t3m_01330 | pfam03144      | GTP_EFTU_D2                                                           | 1.20E-20 |
| 2572232974 | t3m_01330 | pfam03143      | GTP_EFTU_D3                                                           | 3.60E-31 |

|            |           |                |                                                   |          |
|------------|-----------|----------------|---------------------------------------------------|----------|
| 2572232974 | t3m_01330 | TIGR00231      | small GTP-binding protein domain                  | 4.00E-18 |
| 2572232974 | t3m_01330 | TIGR00483      | translation elongation factor EF-1 alpha          | 0.00E+00 |
| 2572232974 | t3m_01330 | TIGR00485      | translation elongation factor TU                  | 3.80E-70 |
| 2572232974 | t3m_01330 | KO:K03231      | elongation factor 1-alpha                         | 0.00E+00 |
| 2572232974 | t3m_01330 | Locus_type     | CDS                                               |          |
| 2572232974 | t3m_01330 | Product_name   | translation elongation factor 1A (EF-1A/EF-Tu)    |          |
| 2572232974 | t3m_01330 | Scaffold       | t3m_contig_70_270_len_21778_read_count_1746931.32 |          |
| 2572232974 | t3m_01330 | Coordinates    | 33..1310(-)                                       |          |
| 2572232974 | t3m_01330 | DNA_length     | 1278bp                                            |          |
| 2572232974 | t3m_01330 | Protein_length | 425aa                                             |          |
| 2572232974 | t3m_01330 | GC             |                                                   | 0.64     |
| 2572232975 | t3m_01331 | COG_category   | [E] Amino acid transport and metabolism           |          |
| 2572232975 | t3m_01331 | COG0346        | Lactoylglutathione lyase and related lyases       | 3.00E-07 |
| 2572232975 | t3m_01331 | pfam12681      | Glyoxalase_2                                      | 1.10E-14 |
| 2572232975 | t3m_01331 | Locus_type     | CDS                                               |          |
| 2572232975 | t3m_01331 | Product_name   | Lactoylglutathione lyase and related lyases       |          |
| 2572232975 | t3m_01331 | Scaffold       | t3m_contig_70_270_len_21778_read_count_1746931.32 |          |
| 2572232975 | t3m_01331 | Coordinates    | 1480..1911(-)                                     |          |
| 2572232975 | t3m_01331 | DNA_length     | 432bp                                             |          |
| 2572232975 | t3m_01331 | Protein_length | 143aa                                             |          |
| 2572232975 | t3m_01331 | GC             |                                                   | 0.66     |
| 2572232976 | t3m_01332 | COG_category   | [K] Transcription                                 |          |
| 2572232976 | t3m_01332 | COG1695        | Predicted transcriptional regulators              | 1.00E-08 |
| 2572232976 | t3m_01332 | pfam03551      | PadR                                              | 3.90E-12 |
| 2572232976 | t3m_01332 | Locus_type     | CDS                                               |          |
| 2572232976 | t3m_01332 | Product_name   | Predicted transcriptional regulators              |          |
| 2572232976 | t3m_01332 | Scaffold       | t3m_contig_70_270_len_21778_read_count_1746931.32 |          |
| 2572232976 | t3m_01332 | Coordinates    | 2094..2489(+)                                     |          |
| 2572232976 | t3m_01332 | DNA_length     | 396bp                                             |          |
| 2572232976 | t3m_01332 | Protein_length | 131aa                                             |          |
| 2572232976 | t3m_01332 | GC             |                                                   | 0.68     |

|            |           |                |                                                            |          |
|------------|-----------|----------------|------------------------------------------------------------|----------|
| 2572232977 | t3m_01333 | Locus_type     | CDS                                                        |          |
| 2572232977 | t3m_01333 | Product_name   | hypothetical protein                                       |          |
| 2572232977 | t3m_01333 | Scaffold       | t3m_contig_70_270_len_21778_read_count_1746931.32          |          |
| 2572232977 | t3m_01333 | Coordinates    | 2533..2817(+)                                              |          |
| 2572232977 | t3m_01333 | DNA_length     | 285bp                                                      |          |
| 2572232977 | t3m_01333 | Protein_length | 94aa                                                       |          |
| 2572232977 | t3m_01333 | GC             |                                                            | 0.64     |
| 2572232977 | t3m_01333 | Transmembrane  | Yes                                                        |          |
| 2572232978 | t3m_01334 | COG_category   | [H] Coenzyme transport and metabolism                      |          |
| 2572232978 | t3m_01334 | COG2226        | Methylase involved in ubiquinone/menaquinone biosynthesis  | 3.00E-19 |
| 2572232978 | t3m_01334 | pfam08241      | Methyltransf_11                                            | 8.10E-17 |
| 2572232978 | t3m_01334 | Locus_type     | CDS                                                        |          |
| 2572232978 | t3m_01334 | Product_name   | Methylase involved in ubiquinone/menaquinone biosynthesis  |          |
| 2572232978 | t3m_01334 | Scaffold       | t3m_contig_70_270_len_21778_read_count_1746931.32          |          |
| 2572232978 | t3m_01334 | Coordinates    | 2869..3429(+)                                              |          |
| 2572232978 | t3m_01334 | DNA_length     | 561bp                                                      |          |
| 2572232978 | t3m_01334 | Protein_length | 186aa                                                      |          |
| 2572232978 | t3m_01334 | GC             |                                                            | 0.71     |
| 2572232979 | t3m_01335 | COG_category   | [I] Lipid transport and metabolism                         |          |
| 2572232979 | t3m_01335 | COG1607        | Acyl-CoA hydrolase                                         | 1.00E-35 |
| 2572232979 | t3m_01335 | pfam03061      | 4HBT                                                       | 7.70E-18 |
| 2572232979 | t3m_01335 | Locus_type     | CDS                                                        |          |
| 2572232979 | t3m_01335 | Product_name   | Acyl-CoA hydrolase                                         |          |
| 2572232979 | t3m_01335 | Scaffold       | t3m_contig_70_270_len_21778_read_count_1746931.32          |          |
| 2572232979 | t3m_01335 | Coordinates    | 3560..3988(+)                                              |          |
| 2572232979 | t3m_01335 | DNA_length     | 429bp                                                      |          |
| 2572232979 | t3m_01335 | Protein_length | 142aa                                                      |          |
| 2572232979 | t3m_01335 | GC             |                                                            | 0.7      |
| 2572232980 | t3m_01336 | COG_category   | [K] Transcription                                          |          |
| 2572232980 | t3m_01336 | COG1813        | Predicted transcription factor, homolog of eukaryotic MBF1 | 2.00E-19 |
| 2572232980 | t3m_01336 | pfam01381      | HTH_3                                                      | 2.30E-06 |

|            |           |                |                                                         |           |
|------------|-----------|----------------|---------------------------------------------------------|-----------|
| 2572232980 | t3m_01336 | TIGR00270      | TIGR00270 family protein                                | 2.60E-22  |
| 2572232980 | t3m_01336 | KO:K03627      | putative transcription factor                           | 4.20E-18  |
| 2572232980 | t3m_01336 | ITERM:01905    | transcriptional regulator, XRE family                   |           |
| 2572232980 | t3m_01336 | Locus_type     | CDS                                                     |           |
| 2572232980 | t3m_01336 | Product_name   | transcriptional regulator, XRE family                   |           |
| 2572232980 | t3m_01336 | Scaffold       | t3m_contig_70_270_len_21778_read_count_1746931.32       |           |
| 2572232980 | t3m_01336 | Coordinates    | 4010..4456(+)                                           |           |
| 2572232980 | t3m_01336 | DNA_length     | 447bp                                                   |           |
| 2572232980 | t3m_01336 | Protein_length | 148aa                                                   |           |
| 2572232980 | t3m_01336 | GC             |                                                         | 0.69      |
| 2572232981 | t3m_01337 | Locus_type     | CDS                                                     |           |
| 2572232981 | t3m_01337 | Product_name   | hypothetical protein                                    |           |
| 2572232981 | t3m_01337 | Scaffold       | t3m_contig_70_270_len_21778_read_count_1746931.32       |           |
| 2572232981 | t3m_01337 | Coordinates    | 4462..4848(-)                                           |           |
| 2572232981 | t3m_01337 | DNA_length     | 387bp                                                   |           |
| 2572232981 | t3m_01337 | Protein_length | 128aa                                                   |           |
| 2572232981 | t3m_01337 | GC             |                                                         | 0.74      |
| 2572232981 | t3m_01337 | Transmembrane  | Yes                                                     |           |
| 2572232982 | t3m_01338 | KEGG_module    | M00029: Urea cycle                                      |           |
| 2572232982 | t3m_01338 | Metacyc        | ARGSYNBSUB-PWY: arginine biosynthesis II (acetyl cycle) |           |
| 2572232982 | t3m_01338 | Metacyc        | PWY-4984: urea cycle                                    |           |
| 2572232982 | t3m_01338 | Metacyc        | ARGSYN-PWY: arginine biosynthesis I                     |           |
| 2572232982 | t3m_01338 | Metacyc        | ARGININE-SYN4-PWY: arginine biosynthesis IV             |           |
| 2572232982 | t3m_01338 | Metacyc        | CITRULLINE-DEG-PWY: citrulline degradation              |           |
| 2572232982 | t3m_01338 | Metacyc        | CITRULBIO-PWY: citrulline biosynthesis                  |           |
| 2572232982 | t3m_01338 | Metacyc        | PWY-4981: proline biosynthesis II (from arginine)       |           |
| 2572232982 | t3m_01338 | IMG_pathway    | 168: L-arginine synthesis from L-ornithine              |           |
| 2572232982 | t3m_01338 | IMG_pathway    | 184: L-arginine degradation by Arg deiminase pathway    |           |
| 2572232982 | t3m_01338 | COG_category   | [E] Amino acid transport and metabolism                 |           |
| 2572232982 | t3m_01338 | COG0078        | Ornithine carbamoyltransferase                          | 8.00E-116 |
| 2572232982 | t3m_01338 | pfam00185      | OTCace                                                  | 6.30E-50  |
| 2572232982 | t3m_01338 | pfam02729      | OTCace_N                                                | 9.60E-47  |

|            |           |                |                                                   |           |
|------------|-----------|----------------|---------------------------------------------------|-----------|
| 2572232982 | t3m_01338 | EC:2.1.3.3     | Ornithine carbamoyltransferase.                   |           |
| 2572232982 | t3m_01338 | TIGR00658      | ornithine carbamoyltransferase                    | 1.30E-125 |
| 2572232982 | t3m_01338 | KO:K00611      | ornithine carbamoyltransferase [EC:2.1.3.3]       | 0.00E+00  |
| 2572232982 | t3m_01338 | ITERM:00433    | ornithine carbamoyltransferase (EC 2.1.3.3)       |           |
| 2572232982 | t3m_01338 | Locus_type     | CDS                                               |           |
| 2572232982 | t3m_01338 | Product_name   | ornithine carbamoyltransferase (EC 2.1.3.3)       |           |
| 2572232982 | t3m_01338 | Scaffold       | t3m_contig_70_270_len_21778_read_count_1746931.32 |           |
| 2572232982 | t3m_01338 | Coordinates    | 4876..5838(-)                                     |           |
| 2572232982 | t3m_01338 | DNA_length     | 963bp                                             |           |
| 2572232982 | t3m_01338 | Protein_length | 320aa                                             |           |
| 2572232982 | t3m_01338 | GC             |                                                   | 0.7       |

|            |           |             |                                                                                        |  |
|------------|-----------|-------------|----------------------------------------------------------------------------------------|--|
| 2572232983 | t3m_01339 | KEGG_module | M00373: Ethylmalonyl pathway                                                           |  |
| 2572232983 | t3m_01339 | KEGG_module | M00095: C5 isoprenoid biosynthesis, mevalonate pathway                                 |  |
| 2572232983 | t3m_01339 | KEGG_module | M00088: Ketone body biosynthesis, acetyl-CoA => acetoacetate/3-hydroxybutyrate/acetone |  |
| 2572232983 | t3m_01339 | KEGG_module | M00374: Dicarboxylate-hydroxybutyrate cycle                                            |  |
| 2572232983 | t3m_01339 | KEGG_module | M00375: Hydroxypropionate-hydroxybutylate cycle                                        |  |
| 2572232983 | t3m_01339 | Metacyc     | PWY-5676: acetyl-CoA fermentation to butyrate II                                       |  |
| 2572232983 | t3m_01339 | Metacyc     | PWY66-368: ketolysis                                                                   |  |
| 2572232983 | t3m_01339 | Metacyc     | ILEUDEG-PWY: isoleucine degradation I                                                  |  |
| 2572232983 | t3m_01339 | Metacyc     | PWY-6174: mevalonate pathway II (archaea)                                              |  |
| 2572232983 | t3m_01339 | Metacyc     | PWY-7003: glycerol degradation to butanol                                              |  |
| 2572232983 | t3m_01339 | Metacyc     | PWY-6588: pyruvate fermentation to acetone                                             |  |
| 2572232983 | t3m_01339 | Metacyc     | PWY-6883: pyruvate fermentation to butanol II                                          |  |
| 2572232983 | t3m_01339 | Metacyc     | PWY-6863: pyruvate fermentation to hexanol                                             |  |
| 2572232983 | t3m_01339 | Metacyc     | CENTFERM-PWY: pyruvate fermentation to butanoate                                       |  |
| 2572232983 | t3m_01339 | Metacyc     | PWY-6876: isopropanol biosynthesis                                                     |  |
| 2572232983 | t3m_01339 | Metacyc     | P163-PWY: lysine fermentation to acetate and butyrate                                  |  |
| 2572232983 | t3m_01339 | Metacyc     | PWY-6583: pyruvate fermentation to butanol I                                           |  |
| 2572232983 | t3m_01339 | Metacyc     | PWY-5177: glutaryl-CoA degradation                                                     |  |
| 2572232983 | t3m_01339 | Metacyc     | ACETOACETATE-DEG-PWY: acetoacetate degradation (to acetyl CoA)                         |  |
| 2572232983 | t3m_01339 | Metacyc     | PWY-922: mevalonate pathway I                                                          |  |
| 2572232983 | t3m_01339 | Metacyc     | PWY1-3: polyhydroxybutyrate biosynthesis                                               |  |
| 2572232983 | t3m_01339 | Metacyc     | PWY-5109: 2-methylbutyrate biosynthesis                                                |  |



|            |           |                |                                                               |          |
|------------|-----------|----------------|---------------------------------------------------------------|----------|
| 2572232983 | t3m_01339 | Metacyc        | PWY-5789: 3-hydroxypropionate/4-hydroxybutyrate cycle         |          |
| 2572232983 | t3m_01339 | Metacyc        | PWY-5741: ethylmalonyl pathway                                |          |
| 2572232983 | t3m_01339 | Metacyc        | PWY66-367: ketogenesis                                        |          |
| 2572232983 | t3m_01339 | COG_category   | [I] Lipid transport and metabolism                            |          |
| 2572232983 | t3m_01339 | COG0183        | Acetyl-CoA acetyltransferase                                  | 5.00E-60 |
| 2572232983 | t3m_01339 | pfam02803      | Thiolase_C                                                    | 2.00E-07 |
| 2572232983 | t3m_01339 | EC:2.3.1.9     | Acetyl-CoA C-acetyltransferase.                               |          |
| 2572232983 | t3m_01339 | KO:K00626      | acetyl-CoA C-acetyltransferase [EC:2.3.1.9]                   | 0.00E+00 |
| 2572232983 | t3m_01339 | Locus_type     | CDS                                                           |          |
| 2572232983 | t3m_01339 | Product_name   | Acetyl-CoA acetyltransferase                                  |          |
| 2572232983 | t3m_01339 | Scaffold       | t3m_contig_70_270_len_21778_read_count_1746931.32             |          |
| 2572232983 | t3m_01339 | Coordinates    | 5949..7382(+)                                                 |          |
| 2572232983 | t3m_01339 | DNA_length     | 1434bp                                                        |          |
| 2572232983 | t3m_01339 | Protein_length | 477aa                                                         |          |
| 2572232983 | t3m_01339 | GC             |                                                               | 0.68     |
| 2572232984 | t3m_01340 | COG_category   | [R] General function prediction only                          |          |
| 2572232984 | t3m_01340 | COG1545        | Predicted nucleic-acid-binding protein containing a Zn-ribbon | 6.00E-26 |
| 2572232984 | t3m_01340 | pfam01796      | DUF35                                                         | 2.50E-13 |
| 2572232984 | t3m_01340 | Locus_type     | CDS                                                           |          |
| 2572232984 | t3m_01340 | Product_name   | Predicted nucleic-acid-binding protein containing a Zn-ribbon |          |
| 2572232984 | t3m_01340 | Scaffold       | t3m_contig_70_270_len_21778_read_count_1746931.32             |          |
| 2572232984 | t3m_01340 | Coordinates    | 7379..7906(+)                                                 |          |
| 2572232984 | t3m_01340 | DNA_length     | 528bp                                                         |          |
| 2572232984 | t3m_01340 | Protein_length | 175aa                                                         |          |
| 2572232984 | t3m_01340 | GC             |                                                               | 0.66     |
| 2572232985 | t3m_01341 | Locus_type     | tRNA                                                          |          |
| 2572232985 | t3m_01341 | Product_name   | tRNA_Phe_GAA                                                  |          |
| 2572232985 | t3m_01341 | Scaffold       | t3m_contig_70_270_len_21778_read_count_1746931.32             |          |
| 2572232985 | t3m_01341 | Coordinates    | 8028..8101(-)                                                 |          |
| 2572232985 | t3m_01341 | DNA_length     | 74bp                                                          |          |
| 2572232985 | t3m_01341 | GC             |                                                               | 0.62     |

|            |           |                |                                                   |           |
|------------|-----------|----------------|---------------------------------------------------|-----------|
| 2572232986 | t3m_01342 | COG_category   | [L] Replication, recombination and repair         |           |
| 2572232986 | t3m_01342 | COG0550        | Topoisomerase IA                                  | 0.00E+00  |
| 2572232986 | t3m_01342 | pfam01396      | zf-C4_Topoism                                     | 4.40E-12  |
| 2572232986 | t3m_01342 | pfam01751      | Toprim                                            | 4.60E-14  |
| 2572232986 | t3m_01342 | pfam01131      | Topoisom_bac                                      | 1.50E-105 |
| 2572232986 | t3m_01342 | EC:5.99.1.2    | DNA topoisomerase.                                |           |
| 2572232986 | t3m_01342 | TIGR01057      | DNA topoisomerase I, archaeal                     | 1.30E-128 |
| 2572232986 | t3m_01342 | KO:K03168      | DNA topoisomerase I [EC:5.99.1.2]                 | 0.00E+00  |
| 2572232986 | t3m_01342 | Locus_type     | CDS                                               |           |
| 2572232986 | t3m_01342 | Product_name   | Topoisomerase IA                                  |           |
| 2572232986 | t3m_01342 | Scaffold       | t3m_contig_70_270_len_21778_read_count_1746931.32 |           |
| 2572232986 | t3m_01342 | Coordinates    | 8288..10870(+)                                    |           |
| 2572232986 | t3m_01342 | DNA_length     | 2583bp                                            |           |
| 2572232986 | t3m_01342 | Protein_length | 860aa                                             |           |
| 2572232986 | t3m_01342 | GC             |                                                   | 0.68      |
| 2572232987 | t3m_01343 | pfam13418      | Kelch_4                                           | 4.20E-05  |
| 2572232987 | t3m_01343 | pfam13418      | Kelch_4                                           | 2.80E-04  |
| 2572232987 | t3m_01343 | Locus_type     | CDS                                               |           |
| 2572232987 | t3m_01343 | Product_name   | Galactose oxidase, central domain                 |           |
| 2572232987 | t3m_01343 | Scaffold       | t3m_contig_70_270_len_21778_read_count_1746931.32 |           |
| 2572232987 | t3m_01343 | Coordinates    | 11161..12216(+)                                   |           |
| 2572232987 | t3m_01343 | DNA_length     | 1056bp                                            |           |
| 2572232987 | t3m_01343 | Protein_length | 351aa                                             |           |
| 2572232987 | t3m_01343 | GC             |                                                   | 0.66      |
| 2572232987 | t3m_01343 | Transmembrane  | Yes                                               |           |
| 2572232988 | t3m_01344 | Metacyc        | CRNFORCAT-PWY: creatinine degradation I           |           |
| 2572232988 | t3m_01344 | COG_category   | [R] General function prediction only              |           |
| 2572232988 | t3m_01344 | COG1402        | Uncharacterized protein, putative amidase         | 1.00E-33  |
| 2572232988 | t3m_01344 | pfam02633      | Creatininase                                      | 2.20E-56  |
| 2572232988 | t3m_01344 | EC:3.5.2.10    | Creatininase.                                     |           |
| 2572232988 | t3m_01344 | KO:K01470      | creatinine amidohydrolase [EC:3.5.2.10]           | 1.30E-40  |
| 2572232988 | t3m_01344 | Locus_type     | CDS                                               |           |

|            |           |                |                                                   |           |
|------------|-----------|----------------|---------------------------------------------------|-----------|
| 2572232988 | t3m_01344 | Product_name   | Uncharacterized protein, putative amidase         |           |
| 2572232988 | t3m_01344 | Scaffold       | t3m_contig_70_270_len_21778_read_count_1746931.32 |           |
| 2572232988 | t3m_01344 | Coordinates    | 12430..13152(+)                                   |           |
| 2572232988 | t3m_01344 | DNA_length     | 723bp                                             |           |
| 2572232988 | t3m_01344 | Protein_length | 240aa                                             |           |
| 2572232988 | t3m_01344 | GC             |                                                   | 0.71      |
|            |           |                |                                                   |           |
| 2572232989 | t3m_01345 | COG_category   | [L] Replication, recombination and repair         |           |
| 2572232989 | t3m_01345 | COG0178        | Excinuclease ATPase subunit                       | 0.00E+00  |
| 2572232989 | t3m_01345 | TIGR00630      | excinuclease ABC, A subunit                       | 0.00E+00  |
| 2572232989 | t3m_01345 | KO:K03701      | excinuclease ABC subunit A                        | 0.00E+00  |
| 2572232989 | t3m_01345 | ITERM:00496    | Excinuclease ABC subunit A                        |           |
| 2572232989 | t3m_01345 | Locus_type     | CDS                                               |           |
| 2572232989 | t3m_01345 | Product_name   | Excinuclease ABC subunit A                        |           |
| 2572232989 | t3m_01345 | Scaffold       | t3m_contig_70_270_len_21778_read_count_1746931.32 |           |
| 2572232989 | t3m_01345 | Coordinates    | 13162..16005(+)                                   |           |
| 2572232989 | t3m_01345 | DNA_length     | 2844bp                                            |           |
| 2572232989 | t3m_01345 | Protein_length | 947aa                                             |           |
| 2572232989 | t3m_01345 | GC             |                                                   | 0.68      |
|            |           |                |                                                   |           |
| 2572232990 | t3m_01346 | IMG_pathway    | 194: DNA incision (NER)                           |           |
| 2572232990 | t3m_01346 | COG_category   | [L] Replication, recombination and repair         |           |
| 2572232990 | t3m_01346 | COG0322        | Nuclease subunit of the excinuclease complex      | 1.00E-118 |
| 2572232990 | t3m_01346 | pfam08459      | UvrC_HhH_N                                        | 9.40E-50  |
| 2572232990 | t3m_01346 | pfam01541      | GIY-YIG                                           | 3.70E-08  |
| 2572232990 | t3m_01346 | TIGR00194      | excinuclease ABC, C subunit                       | 8.10E-124 |
| 2572232990 | t3m_01346 | KO:K03703      | excinuclease ABC subunit C                        | 0.00E+00  |
| 2572232990 | t3m_01346 | ITERM:00498    | Excinuclease ABC subunit C                        |           |
| 2572232990 | t3m_01346 | Locus_type     | CDS                                               |           |
| 2572232990 | t3m_01346 | Product_name   | Excinuclease ABC subunit C                        |           |
| 2572232990 | t3m_01346 | Scaffold       | t3m_contig_70_270_len_21778_read_count_1746931.32 |           |
| 2572232990 | t3m_01346 | Coordinates    | 16002..17720(+)                                   |           |
| 2572232990 | t3m_01346 | DNA_length     | 1719bp                                            |           |
| 2572232990 | t3m_01346 | Protein_length | 572aa                                             |           |

|            |           |                |                                                                        |          |
|------------|-----------|----------------|------------------------------------------------------------------------|----------|
| 2572232990 | t3m_01346 | GC             |                                                                        | 0.71     |
| 2572232991 | t3m_01347 | COG_category   | [S] Function unknown                                                   |          |
| 2572232991 | t3m_01347 | COG2318        | Uncharacterized protein conserved in bacteria                          | 1.00E-07 |
| 2572232991 | t3m_01347 | pfam12867      | DinB_2                                                                 | 4.10E-12 |
| 2572232991 | t3m_01347 | Locus_type     | CDS                                                                    |          |
| 2572232991 | t3m_01347 | Product_name   | Uncharacterized protein conserved in bacteria                          |          |
| 2572232991 | t3m_01347 | Scaffold       | t3m_contig_70_270_len_21778_read_count_1746931.32                      |          |
| 2572232991 | t3m_01347 | Coordinates    | 17726..18289(-)                                                        |          |
| 2572232991 | t3m_01347 | DNA_length     | 564bp                                                                  |          |
| 2572232991 | t3m_01347 | Protein_length | 187aa                                                                  |          |
| 2572232991 | t3m_01347 | GC             |                                                                        | 0.69     |
| 2572232992 | t3m_01348 | KEGG_module    | M00343: Archaeal proteasome                                            |          |
| 2572232992 | t3m_01348 | KEGG_module    | M00342: Bacterial proteasome                                           |          |
| 2572232992 | t3m_01348 | COG_category   | [O] Posttranslational modification, protein turnover, chaperones       |          |
| 2572232992 | t3m_01348 | COG0638        | 20S proteasome, alpha and beta subunits                                | 5.00E-49 |
| 2572232992 | t3m_01348 | pfam00227      | Proteasome                                                             | 6.90E-45 |
| 2572232992 | t3m_01348 | pfam10584      | Proteasome_A_N                                                         | 8.00E-14 |
| 2572232992 | t3m_01348 | EC:3.4.25.1    | Proteasome endopeptidase complex.                                      |          |
| 2572232992 | t3m_01348 | KO:K03432      | proteasome alpha subunit [EC:3.4.25.1]                                 | 0.00E+00 |
| 2572232992 | t3m_01348 | Locus_type     | CDS                                                                    |          |
| 2572232992 | t3m_01348 | Product_name   | 20S proteasome, alpha and beta subunits                                |          |
| 2572232992 | t3m_01348 | Scaffold       | t3m_contig_70_270_len_21778_read_count_1746931.32                      |          |
| 2572232992 | t3m_01348 | Coordinates    | 18320..19057(-)                                                        |          |
| 2572232992 | t3m_01348 | DNA_length     | 738bp                                                                  |          |
| 2572232992 | t3m_01348 | Protein_length | 245aa                                                                  |          |
| 2572232992 | t3m_01348 | GC             |                                                                        | 0.69     |
| 2572232993 | t3m_01349 | COG_category   | [R] General function prediction only                                   |          |
| 2572232993 | t3m_01349 | COG2108        | Uncharacterized conserved protein related to pyruvate formate-lyase a  | 4.00E-76 |
| 2572232993 | t3m_01349 | pfam04055      | Radical_SAM                                                            | 1.10E-09 |
| 2572232993 | t3m_01349 | Locus_type     | CDS                                                                    |          |
| 2572232993 | t3m_01349 | Product_name   | Uncharacterized conserved protein related to pyruvate formate-lyase ac |          |

|            |           |                |                                                                       |          |
|------------|-----------|----------------|-----------------------------------------------------------------------|----------|
| 2572232993 | t3m_01349 | Scaffold       | t3m_contig_70_270_len_21778_read_count_1746931.32                     |          |
| 2572232993 | t3m_01349 | Coordinates    | 19272..20411(+)                                                       |          |
| 2572232993 | t3m_01349 | DNA_length     | 1140bp                                                                |          |
| 2572232993 | t3m_01349 | Protein_length | 379aa                                                                 |          |
| 2572232993 | t3m_01349 | GC             |                                                                       | 0.7      |
| 2572232994 | t3m_01350 | KEGG_module    | M00377: Reductive acetyl-CoA pathway (Wood-Ljungdahl pathway)         |          |
| 2572232994 | t3m_01350 | KEGG_module    | M00140: C1-unit interconversion, prokaryotes                          |          |
| 2572232994 | t3m_01350 | Metacyc        | PWY-5497: purine nucleobases degradation II (anaerobic)               |          |
| 2572232994 | t3m_01350 | Metacyc        | PWY-3841: folate transformations II                                   |          |
| 2572232994 | t3m_01350 | Metacyc        | 1CMET2-PWY: formylTHF biosynthesis I                                  |          |
| 2572232994 | t3m_01350 | Metacyc        | PWY-5030: histidine degradation III                                   |          |
| 2572232994 | t3m_01350 | Metacyc        | PWY-1722: formaldehyde oxidation V (tetrahydrofolate pathway)         |          |
| 2572232994 | t3m_01350 | Metacyc        | PWY-6613: tetrahydrofolate salvage from 5,10-methenyltetrahydrofolate |          |
| 2572232994 | t3m_01350 | Metacyc        | P164-PWY: purine nucleobases degradation I (anaerobic)                |          |
| 2572232994 | t3m_01350 | Metacyc        | CODH-PWY: reductive acetyl coenzyme A pathway                         |          |
| 2572232994 | t3m_01350 | Metacyc        | PWY-2201: folate transformations I                                    |          |
| 2572232994 | t3m_01350 | COG_category   | [H] Coenzyme transport and metabolism                                 |          |
| 2572232994 | t3m_01350 | COG0190        | 5,10-methylene-tetrahydrofolate dehydrogenase/Methenyl tetrahydro     | 1.00E-58 |
| 2572232994 | t3m_01350 | pfam02882      | THF_DHG_CYH_C                                                         | 8.50E-45 |
| 2572232994 | t3m_01350 | pfam00763      | THF_DHG_CYH                                                           | 2.40E-19 |
| 2572232994 | t3m_01350 | EC:3.5.4.9     | Methenyltetrahydrofolate cyclohydrolase.                              |          |
| 2572232994 | t3m_01350 | EC:1.5.1.5     | Methylenetetrahydrofolate dehydrogenase (NADP(+)).                    |          |
| 2572232994 | t3m_01350 | KO:K01491      | methylenetetrahydrofolate dehydrogenase (NADP+) / methenyltetrahy     | 0.00E+00 |
| 2572232994 | t3m_01350 | Locus_type     | CDS                                                                   |          |
| 2572232994 | t3m_01350 | Product_name   | 5,10-methylene-tetrahydrofolate dehydrogenase/Methenyl tetrahydrof    |          |
| 2572232994 | t3m_01350 | Scaffold       | t3m_contig_70_270_len_21778_read_count_1746931.32                     |          |
| 2572232994 | t3m_01350 | Coordinates    | 20578..21468(-)                                                       |          |
| 2572232994 | t3m_01350 | DNA_length     | 891bp                                                                 |          |
| 2572232994 | t3m_01350 | Protein_length | 296aa                                                                 |          |
| 2572232994 | t3m_01350 | GC             |                                                                       | 0.7      |
| 2572232995 | t3m_01351 | COG_category   | [T] Signal transduction mechanisms                                    |          |
| 2572232995 | t3m_01351 | COG1956        | GAF domain-containing protein                                         | 4.00E-33 |

|            |           |                |                                                       |          |
|------------|-----------|----------------|-------------------------------------------------------|----------|
| 2572232995 | t3m_01351 | pfam13492      | GAF_3                                                 | 2.30E-12 |
| 2572232995 | t3m_01351 | KO:K07170      | GAF domain-containing protein                         | 3.70E-38 |
| 2572232995 | t3m_01351 | Locus_type     | CDS                                                   |          |
| 2572232995 | t3m_01351 | Product_name   | GAF domain-containing protein                         |          |
| 2572232995 | t3m_01351 | Scaffold       | t3m_contig_70_309_len_20133_read_count_1504061.33     |          |
| 2572232995 | t3m_01351 | Coordinates    | 110..601(+)                                           |          |
| 2572232995 | t3m_01351 | DNA_length     | 492bp                                                 |          |
| 2572232995 | t3m_01351 | Protein_length | 163aa                                                 |          |
| 2572232995 | t3m_01351 | GC             |                                                       | 0.69     |
|            |           |                |                                                       |          |
| 2572232996 | t3m_01352 | Metacyc        | PWY-6654: phosphopantothenate biosynthesis III        |          |
| 2572232996 | t3m_01352 | IMG_pathway    | 116: Coenzyme A biosynthesis                          |          |
| 2572232996 | t3m_01352 | COG_category   | [S] Function unknown                                  |          |
| 2572232996 | t3m_01352 | COG1701        | Uncharacterized protein conserved in archaea          | 1.00E-67 |
| 2572232996 | t3m_01352 | pfam02006      | DUF137                                                | 7.90E-60 |
| 2572232996 | t3m_01352 | EC:6.3.2.36    | 4-phosphopantoate--beta-alanine ligase.               |          |
| 2572232996 | t3m_01352 | KO:K09722      | 4-phosphopantoate---beta-alanine ligase [EC:6.3.2.36] | 0.00E+00 |
| 2572232996 | t3m_01352 | ITERM:03320    | pantothenate synthetase (EC 6.3.2.1)                  |          |
| 2572232996 | t3m_01352 | Locus_type     | CDS                                                   |          |
| 2572232996 | t3m_01352 | Product_name   | pantothenate synthetase (EC 6.3.2.1)                  |          |
| 2572232996 | t3m_01352 | Scaffold       | t3m_contig_70_309_len_20133_read_count_1504061.33     |          |
| 2572232996 | t3m_01352 | Coordinates    | 501..1325(-)                                          |          |
| 2572232996 | t3m_01352 | DNA_length     | 825bp                                                 |          |
| 2572232996 | t3m_01352 | Protein_length | 274aa                                                 |          |
| 2572232996 | t3m_01352 | GC             |                                                       | 0.74     |
|            |           |                |                                                       |          |
| 2572232997 | t3m_01353 | Locus_type     | CDS                                                   |          |
| 2572232997 | t3m_01353 | Product_name   | hypothetical protein                                  |          |
| 2572232997 | t3m_01353 | Scaffold       | t3m_contig_70_309_len_20133_read_count_1504061.33     |          |
| 2572232997 | t3m_01353 | Coordinates    | 1338..2063(-)                                         |          |
| 2572232997 | t3m_01353 | DNA_length     | 726bp                                                 |          |
| 2572232997 | t3m_01353 | Protein_length | 241aa                                                 |          |
| 2572232997 | t3m_01353 | GC             |                                                       | 0.68     |

|            |           |                |                                                                   |          |
|------------|-----------|----------------|-------------------------------------------------------------------|----------|
| 2572232998 | t3m_01354 | KEGG_module    | M00036: Leucine degradation, leucine => acetoacetate + acetyl-CoA |          |
| 2572232998 | t3m_01354 | Metacyc        | LEU-DEG2-PWY: leucine degradation I                               |          |
| 2572232998 | t3m_01354 | COG_category   | [I] Lipid transport and metabolism                                |          |
| 2572232998 | t3m_01354 | COG1960        | Acyl-CoA dehydrogenases                                           | 3.00E-86 |
| 2572232998 | t3m_01354 | pfam02771      | Acyl-CoA_dh_N                                                     | 6.10E-28 |
| 2572232998 | t3m_01354 | pfam00441      | Acyl-CoA_dh_1                                                     | 7.30E-44 |
| 2572232998 | t3m_01354 | pfam02770      | Acyl-CoA_dh_M                                                     | 9.80E-22 |
| 2572232998 | t3m_01354 | EC:1.3.8.4     | Isovaleryl-CoA dehydrogenase.                                     |          |
| 2572232998 | t3m_01354 | KO:K00253      | isovaleryl-CoA dehydrogenase [EC:1.3.8.4]                         | 0.00E+00 |
| 2572232998 | t3m_01354 | Locus_type     | CDS                                                               |          |
| 2572232998 | t3m_01354 | Product_name   | Acyl-CoA dehydrogenases                                           |          |
| 2572232998 | t3m_01354 | Scaffold       | t3m_contig_70_309_len_20133_read_count_1504061.33                 |          |
| 2572232998 | t3m_01354 | Coordinates    | 2186..3340(-)                                                     |          |
| 2572232998 | t3m_01354 | DNA_length     | 1155bp                                                            |          |
| 2572232998 | t3m_01354 | Protein_length | 384aa                                                             |          |
| 2572232998 | t3m_01354 | GC             |                                                                   | 0.68     |
|            |           |                |                                                                   |          |
| 2572232999 | t3m_01355 | KEGG_module    | M00115: NAD biosynthesis, aspartate => NAD                        |          |
| 2572232999 | t3m_01355 | Metacyc        | PWY-5316: nicotine biosynthesis                                   |          |
| 2572232999 | t3m_01355 | Metacyc        | PYRIDNUCSYN-PWY: NAD biosynthesis I (from aspartate)              |          |
| 2572232999 | t3m_01355 | IMG_pathway    | 210: Quinolinate biosynthesis via aspartate                       |          |
| 2572232999 | t3m_01355 | COG_category   | [H] Coenzyme transport and metabolism                             |          |
| 2572232999 | t3m_01355 | COG0029        | Aspartate oxidase                                                 | 0.00E+00 |
| 2572232999 | t3m_01355 | pfam00890      | FAD_binding_2                                                     | 5.20E-85 |
| 2572232999 | t3m_01355 | pfam02910      | Succ_DH_flav_C                                                    | 5.10E-14 |
| 2572232999 | t3m_01355 | EC:1.4.3.16    | L-aspartate oxidase.                                              |          |
| 2572232999 | t3m_01355 | TIGR00551      | L-aspartate oxidase                                               | 0.00E+00 |
| 2572232999 | t3m_01355 | KO:K00278      | L-aspartate oxidase [EC:1.4.3.16]                                 | 0.00E+00 |
| 2572232999 | t3m_01355 | ITERM:00561    | L-aspartate oxidase (EC 1.4.3.16)                                 |          |
| 2572232999 | t3m_01355 | Locus_type     | CDS                                                               |          |
| 2572232999 | t3m_01355 | Product_name   | L-aspartate oxidase (EC 1.4.3.16)                                 |          |
| 2572232999 | t3m_01355 | Scaffold       | t3m_contig_70_309_len_20133_read_count_1504061.33                 |          |
| 2572232999 | t3m_01355 | Coordinates    | 3383..4951(-)                                                     |          |
| 2572232999 | t3m_01355 | DNA_length     | 1569bp                                                            |          |

|            |           |                |                                                   |          |
|------------|-----------|----------------|---------------------------------------------------|----------|
| 2572232999 | t3m_01355 | Protein_length | 522aa                                             |          |
| 2572232999 | t3m_01355 | GC             |                                                   | 0.72     |
| 2572233000 | t3m_01356 | Locus_type     | CDS                                               |          |
| 2572233000 | t3m_01356 | Product_name   | hypothetical protein                              |          |
| 2572233000 | t3m_01356 | Scaffold       | t3m_contig_70_309_len_20133_read_count_1504061.33 |          |
| 2572233000 | t3m_01356 | Coordinates    | 5039..6430(+)                                     |          |
| 2572233000 | t3m_01356 | DNA_length     | 1392bp                                            |          |
| 2572233000 | t3m_01356 | Protein_length | 463aa                                             |          |
| 2572233000 | t3m_01356 | GC             |                                                   | 0.71     |
| 2572233001 | t3m_01357 | pfam00583      | Acetyltransf_1                                    | 6.20E-13 |
| 2572233001 | t3m_01357 | Locus_type     | CDS                                               |          |
| 2572233001 | t3m_01357 | Product_name   | Acetyltransferase (GNAT) family                   |          |
| 2572233001 | t3m_01357 | Scaffold       | t3m_contig_70_309_len_20133_read_count_1504061.33 |          |
| 2572233001 | t3m_01357 | Coordinates    | 6379..7344(-)                                     |          |
| 2572233001 | t3m_01357 | DNA_length     | 966bp                                             |          |
| 2572233001 | t3m_01357 | Protein_length | 321aa                                             |          |
| 2572233001 | t3m_01357 | GC             |                                                   | 0.7      |
| 2572233002 | t3m_01358 | KEGG_module    | M00005: PRPP biosynthesis, ribose 5P => PRPP      |          |
| 2572233002 | t3m_01358 | Metacyc        | PWY0-662: PRPP biosynthesis I                     |          |
| 2572233002 | t3m_01358 | COG_category   | [E] Amino acid transport and metabolism           |          |
| 2572233002 | t3m_01358 | COG_category   | [F] Nucleotide transport and metabolism           |          |
| 2572233002 | t3m_01358 | COG0462        | Phosphoribosylpyrophosphate synthetase            | 8.00E-71 |
| 2572233002 | t3m_01358 | pfam00156      | Pribosyltran                                      | 1.60E-13 |
| 2572233002 | t3m_01358 | pfam13793      | Pribosyltran_N                                    | 3.80E-25 |
| 2572233002 | t3m_01358 | EC:2.7.6.1     | Ribose-phosphate diphosphokinase.                 |          |
| 2572233002 | t3m_01358 | TIGR01251      | ribose-phosphate pyrophosphokinase                | 3.00E-79 |
| 2572233002 | t3m_01358 | KO:K00948      | ribose-phosphate pyrophosphokinase [EC:2.7.6.1]   | 0.00E+00 |
| 2572233002 | t3m_01358 | Locus_type     | CDS                                               |          |
| 2572233002 | t3m_01358 | Product_name   | ribose-phosphate pyrophosphokinase                |          |
| 2572233002 | t3m_01358 | Scaffold       | t3m_contig_70_309_len_20133_read_count_1504061.33 |          |
| 2572233002 | t3m_01358 | Coordinates    | 7359..8234(-)                                     |          |



|            |           |                |                                                                            |          |
|------------|-----------|----------------|----------------------------------------------------------------------------|----------|
| 2572233002 | t3m_01358 | DNA_length     | 876bp                                                                      |          |
| 2572233002 | t3m_01358 | Protein_length | 291aa                                                                      |          |
| 2572233002 | t3m_01358 | GC             |                                                                            | 0.67     |
| 2572233003 | t3m_01359 | COG_category   | [U] Intracellular trafficking, secretion, and vesicular transport          |          |
| 2572233003 | t3m_01359 | COG0681        | Signal peptidase I                                                         | 6.00E-11 |
| 2572233003 | t3m_01359 | Locus_type     | CDS                                                                        |          |
| 2572233003 | t3m_01359 | Product_name   | hypothetical protein                                                       |          |
| 2572233003 | t3m_01359 | Scaffold       | t3m_contig_70_309_len_20133_read_count_1504061.33                          |          |
| 2572233003 | t3m_01359 | Coordinates    | 8358..9719(-)                                                              |          |
| 2572233003 | t3m_01359 | DNA_length     | 1362bp                                                                     |          |
| 2572233003 | t3m_01359 | Protein_length | 453aa                                                                      |          |
| 2572233003 | t3m_01359 | GC             |                                                                            | 0.67     |
| 2572233003 | t3m_01359 | Transmembrane  | Yes                                                                        |          |
| 2572233004 | t3m_01360 | KEGG_module    | M00038: Tryptophan metabolism, tryptophan => kynurenine => 2-aminomuconate |          |
| 2572233004 | t3m_01360 | Metacyc        | TRPCAT-PWY: tryptophan degradation I (via anthranilate)                    |          |
| 2572233004 | t3m_01360 | Metacyc        | PWY-5651: tryptophan degradation to 2-amino-3-carboxymuconate semialdehyde |          |
| 2572233004 | t3m_01360 | Metacyc        | PWY-6309: tryptophan degradation XI (mammalian, via kynurenine)            |          |
| 2572233004 | t3m_01360 | IMG_pathway    | 211: Quinolate biosynthesis via tryptophan                                 |          |
| 2572233004 | t3m_01360 | IMG_pathway    | 881: L-tryptophan degradation to anthranilate                              |          |
| 2572233004 | t3m_01360 | COG_category   | [R] General function prediction only                                       |          |
| 2572233004 | t3m_01360 | COG1878        | Predicted metal-dependent hydrolase                                        | 3.00E-41 |
| 2572233004 | t3m_01360 | pfam04199      | Cyclase                                                                    | 1.90E-26 |
| 2572233004 | t3m_01360 | EC:3.5.1.9     | Arylformamidase.                                                           |          |
| 2572233004 | t3m_01360 | KO:K07130      | arylformamidase [EC:3.5.1.9]                                               | 5.30E-42 |
| 2572233004 | t3m_01360 | ITERM:00589    | Kynurenine formamidase (EC 3.5.1.9)                                        |          |
| 2572233004 | t3m_01360 | Locus_type     | CDS                                                                        |          |
| 2572233004 | t3m_01360 | Product_name   | Kynurenine formamidase (EC 3.5.1.9)                                        |          |
| 2572233004 | t3m_01360 | Scaffold       | t3m_contig_70_309_len_20133_read_count_1504061.33                          |          |
| 2572233004 | t3m_01360 | Coordinates    | 9874..10503(+)                                                             |          |
| 2572233004 | t3m_01360 | DNA_length     | 630bp                                                                      |          |
| 2572233004 | t3m_01360 | Protein_length | 209aa                                                                      |          |
| 2572233004 | t3m_01360 | GC             |                                                                            | 0.7      |

|            |           |                |                                                                     |          |
|------------|-----------|----------------|---------------------------------------------------------------------|----------|
| 2572233005 | t3m_01361 | Locus_type     | CDS                                                                 |          |
| 2572233005 | t3m_01361 | Product_name   | hypothetical protein                                                |          |
| 2572233005 | t3m_01361 | Scaffold       | t3m_contig_70_309_len_20133_read_count_1504061.33                   |          |
| 2572233005 | t3m_01361 | Coordinates    | 10517..10945(+)                                                     |          |
| 2572233005 | t3m_01361 | DNA_length     | 429bp                                                               |          |
| 2572233005 | t3m_01361 | Protein_length | 142aa                                                               |          |
| 2572233005 | t3m_01361 | GC             |                                                                     | 0.66     |
| 2572233005 | t3m_01361 | Transmembrane  | Yes                                                                 |          |
| 2572233006 | t3m_01362 | COG_category   | [S] Function unknown                                                |          |
| 2572233006 | t3m_01362 | COG2835        | Uncharacterized conserved protein                                   | 4.00E-07 |
| 2572233006 | t3m_01362 | pfam03966      | Trm112p                                                             | 8.30E-11 |
| 2572233006 | t3m_01362 | Locus_type     | CDS                                                                 |          |
| 2572233006 | t3m_01362 | Product_name   | Uncharacterized conserved protein                                   |          |
| 2572233006 | t3m_01362 | Scaffold       | t3m_contig_70_309_len_20133_read_count_1504061.33                   |          |
| 2572233006 | t3m_01362 | Coordinates    | 10961..11143(-)                                                     |          |
| 2572233006 | t3m_01362 | DNA_length     | 183bp                                                               |          |
| 2572233006 | t3m_01362 | Protein_length | 60aa                                                                |          |
| 2572233006 | t3m_01362 | GC             |                                                                     | 0.64     |
| 2572233007 | t3m_01363 | COG_category   | [J] Translation, ribosomal structure and biogenesis                 |          |
| 2572233007 | t3m_01363 | COG5257        | Translation initiation factor 2, gamma subunit (eIF-2gamma; GTPase) | 0.00E+00 |
| 2572233007 | t3m_01363 | pfam09173      | eIF2_C                                                              | 2.90E-22 |
| 2572233007 | t3m_01363 | pfam00009      | GTP_EFTU                                                            | 1.10E-39 |
| 2572233007 | t3m_01363 | TIGR03680      | translation initiation factor 2 subunit gamma                       | 0.00E+00 |
| 2572233007 | t3m_01363 | TIGR00231      | small GTP-binding protein domain                                    | 1.80E-16 |
| 2572233007 | t3m_01363 | KO:K03242      | translation initiation factor 2 subunit 3                           | 0.00E+00 |
| 2572233007 | t3m_01363 | Locus_type     | CDS                                                                 |          |
| 2572233007 | t3m_01363 | Product_name   | translation initiation factor 2 subunit gamma (aeIF-2g)             |          |
| 2572233007 | t3m_01363 | Scaffold       | t3m_contig_70_309_len_20133_read_count_1504061.33                   |          |
| 2572233007 | t3m_01363 | Coordinates    | 11140..12375(-)                                                     |          |
| 2572233007 | t3m_01363 | DNA_length     | 1236bp                                                              |          |
| 2572233007 | t3m_01363 | Protein_length | 411aa                                                               |          |

|            |           |                |                                                       |          |
|------------|-----------|----------------|-------------------------------------------------------|----------|
| 2572233007 | t3m_01363 | GC             |                                                       | 0.68     |
| 2572233008 | t3m_01364 | KEGG_module    | M00177: Ribosome, eukaryotes                          |          |
| 2572233008 | t3m_01364 | KEGG_module    | M00179: Ribosome, archaea                             |          |
| 2572233008 | t3m_01364 | COG_category   | [J] Translation, ribosomal structure and biogenesis   |          |
| 2572233008 | t3m_01364 | COG2125        | Ribosomal protein S6E (S10)                           | 5.00E-26 |
| 2572233008 | t3m_01364 | pfam01092      | Ribosomal_S6e                                         | 4.40E-25 |
| 2572233008 | t3m_01364 | KO:K02991      | small subunit ribosomal protein S6e                   | 1.30E-28 |
| 2572233008 | t3m_01364 | ITERM:00285    | SSU ribosomal protein S6E                             |          |
| 2572233008 | t3m_01364 | Locus_type     | CDS                                                   |          |
| 2572233008 | t3m_01364 | Product_name   | SSU ribosomal protein S6E                             |          |
| 2572233008 | t3m_01364 | Scaffold       | t3m_contig_70_309_len_20133_read_count_1504061.33     |          |
| 2572233008 | t3m_01364 | Coordinates    | 12372..12749(-)                                       |          |
| 2572233008 | t3m_01364 | DNA_length     | 378bp                                                 |          |
| 2572233008 | t3m_01364 | Protein_length | 125aa                                                 |          |
| 2572233008 | t3m_01364 | GC             |                                                       | 0.67     |
| 2572233009 | t3m_01365 | pfam06847      | Arc_PepC_II                                           | 2.10E-08 |
| 2572233009 | t3m_01365 | Locus_type     | CDS                                                   |          |
| 2572233009 | t3m_01365 | Product_name   | Archaeal Peptidase A24 C-terminus Type II             |          |
| 2572233009 | t3m_01365 | Scaffold       | t3m_contig_70_309_len_20133_read_count_1504061.33     |          |
| 2572233009 | t3m_01365 | Coordinates    | 12962..13882(+)                                       |          |
| 2572233009 | t3m_01365 | DNA_length     | 921bp                                                 |          |
| 2572233009 | t3m_01365 | Protein_length | 306aa                                                 |          |
| 2572233009 | t3m_01365 | GC             |                                                       | 0.69     |
| 2572233009 | t3m_01365 | Transmembrane  | Yes                                                   |          |
| 2572233010 | t3m_01366 | KEGG_module    | M00376: 3-Hydroxypropionate bicycle                   |          |
| 2572233010 | t3m_01366 | KEGG_module    | M00375: Hydroxypropionate-hydroxybutylate cycle       |          |
| 2572233010 | t3m_01366 | Metacyc        | PWY-5743: 3-hydroxypropionate cycle                   |          |
| 2572233010 | t3m_01366 | Metacyc        | PWY0-43: conversion of succinate to propionate        |          |
| 2572233010 | t3m_01366 | Metacyc        | PROPIONMET-PWY: methylmalonyl pathway                 |          |
| 2572233010 | t3m_01366 | Metacyc        | P108-PWY: pyruvate fermentation to propionate I       |          |
| 2572233010 | t3m_01366 | Metacyc        | PWY-5789: 3-hydroxypropionate/4-hydroxybutyrate cycle |          |

|            |           |                |                                                                        |          |
|------------|-----------|----------------|------------------------------------------------------------------------|----------|
| 2572233010 | t3m_01366 | Metacyc        | PWY-6728: methylaspartate cycle                                        |          |
| 2572233010 | t3m_01366 | COG_category   | [I] Lipid transport and metabolism                                     |          |
| 2572233010 | t3m_01366 | COG2185        | Methylmalonyl-CoA mutase, C-terminal domain/subunit (cobalamin-bir     | 8.00E-36 |
| 2572233010 | t3m_01366 | pfam02310      | B12-binding                                                            | 1.70E-22 |
| 2572233010 | t3m_01366 | EC:5.4.99.2    | Methylmalonyl-CoA mutase.                                              |          |
| 2572233010 | t3m_01366 | TIGR00640      | methylmalonyl-CoA mutase C-terminal domain                             | 7.40E-55 |
| 2572233010 | t3m_01366 | KO:K01849      | methylmalonyl-CoA mutase, C-terminal domain [EC:5.4.99.2]              | 1.10E-44 |
| 2572233010 | t3m_01366 | Locus_type     | CDS                                                                    |          |
| 2572233010 | t3m_01366 | Product_name   | methylmalonyl-CoA mutase C-terminal domain                             |          |
| 2572233010 | t3m_01366 | Scaffold       | t3m_contig_70_309_len_20133_read_count_1504061.33                      |          |
| 2572233010 | t3m_01366 | Coordinates    | 13935..14357(+)                                                        |          |
| 2572233010 | t3m_01366 | DNA_length     | 423bp                                                                  |          |
| 2572233010 | t3m_01366 | Protein_length | 140aa                                                                  |          |
| 2572233010 | t3m_01366 | GC             |                                                                        | 0.68     |
| 2572233011 | t3m_01367 | COG_category   | [E] Amino acid transport and metabolism                                |          |
| 2572233011 | t3m_01367 | COG1703        | Putative periplasmic protein kinase ArgK and related GTPases of G3E fa | 2.00E-76 |
| 2572233011 | t3m_01367 | pfam03308      | ArgK                                                                   | 5.50E-90 |
| 2572233011 | t3m_01367 | EC:2.7.-       | Transferases. Transferring phosphorous-containing groups.              |          |
| 2572233011 | t3m_01367 | TIGR00750      | LAO/AO transport system ATPase                                         | 7.30E-99 |
| 2572233011 | t3m_01367 | KO:K07588      | LAO/AO transport system kinase [EC:2.7.-.]                             | 0.00E+00 |
| 2572233011 | t3m_01367 | Locus_type     | CDS                                                                    |          |
| 2572233011 | t3m_01367 | Product_name   | LAO/AO transport system ATPase                                         |          |
| 2572233011 | t3m_01367 | Scaffold       | t3m_contig_70_309_len_20133_read_count_1504061.33                      |          |
| 2572233011 | t3m_01367 | Coordinates    | 14354..15322(+)                                                        |          |
| 2572233011 | t3m_01367 | DNA_length     | 969bp                                                                  |          |
| 2572233011 | t3m_01367 | Protein_length | 322aa                                                                  |          |
| 2572233011 | t3m_01367 | GC             |                                                                        | 0.72     |
| 2572233012 | t3m_01368 | Locus_type     | CDS                                                                    |          |
| 2572233012 | t3m_01368 | Product_name   | hypothetical protein                                                   |          |
| 2572233012 | t3m_01368 | Scaffold       | t3m_contig_70_309_len_20133_read_count_1504061.33                      |          |
| 2572233012 | t3m_01368 | Coordinates    | 15319..15906(+)                                                        |          |
| 2572233012 | t3m_01368 | DNA_length     | 588bp                                                                  |          |

|            |           |                |                                                                  |          |
|------------|-----------|----------------|------------------------------------------------------------------|----------|
| 2572233012 | t3m_01368 | Protein_length | 195aa                                                            |          |
| 2572233012 | t3m_01368 | GC             |                                                                  | 0.69     |
| 2572233012 | t3m_01368 | Transmembrane  | Yes                                                              |          |
| 2572233013 | t3m_01369 | COG_category   | [O] Posttranslational modification, protein turnover, chaperones |          |
| 2572233013 | t3m_01369 | COG1047        | FKBP-type peptidyl-prolyl cis-trans isomerases 2                 | 3.00E-20 |
| 2572233013 | t3m_01369 | EC:5.2.1.8     | Peptidylprolyl isomerase.                                        |          |
| 2572233013 | t3m_01369 | KO:K03775      | FKBP-type peptidyl-prolyl cis-trans isomerase SlyD [EC:5.2.1.8]  | 7.30E-38 |
| 2572233013 | t3m_01369 | Locus_type     | CDS                                                              |          |
| 2572233013 | t3m_01369 | Product_name   | FKBP-type peptidyl-prolyl cis-trans isomerases 2                 |          |
| 2572233013 | t3m_01369 | Scaffold       | t3m_contig_70_309_len_20133_read_count_1504061.33                |          |
| 2572233013 | t3m_01369 | Coordinates    | 16011..16892(-)                                                  |          |
| 2572233013 | t3m_01369 | DNA_length     | 882bp                                                            |          |
| 2572233013 | t3m_01369 | Protein_length | 293aa                                                            |          |
| 2572233013 | t3m_01369 | GC             |                                                                  | 0.68     |
| 2572233014 | t3m_01370 | pfam13641      | Glyco_tranf_2_3                                                  | 1.10E-07 |
| 2572233014 | t3m_01370 | Locus_type     | CDS                                                              |          |
| 2572233014 | t3m_01370 | Product_name   | Glycosyltransferase like family 2                                |          |
| 2572233014 | t3m_01370 | Scaffold       | t3m_contig_70_309_len_20133_read_count_1504061.33                |          |
| 2572233014 | t3m_01370 | Coordinates    | 16955..17833(-)                                                  |          |
| 2572233014 | t3m_01370 | DNA_length     | 879bp                                                            |          |
| 2572233014 | t3m_01370 | Protein_length | 292aa                                                            |          |
| 2572233014 | t3m_01370 | GC             |                                                                  | 0.71     |
| 2572233015 | t3m_01371 | COG_category   | [M] Cell wall/membrane/envelope biogenesis                       |          |
| 2572233015 | t3m_01371 | COG0438        | Glycosyltransferase                                              | 2.00E-24 |
| 2572233015 | t3m_01371 | pfam13692      | Glyco_trans_1_4                                                  | 2.00E-16 |
| 2572233015 | t3m_01371 | pfam13579      | Glyco_trans_4_4                                                  | 1.10E-14 |
| 2572233015 | t3m_01371 | Locus_type     | CDS                                                              |          |
| 2572233015 | t3m_01371 | Product_name   | Glycosyltransferase                                              |          |
| 2572233015 | t3m_01371 | Scaffold       | t3m_contig_70_309_len_20133_read_count_1504061.33                |          |
| 2572233015 | t3m_01371 | Coordinates    | 17923..18960(+)                                                  |          |
| 2572233015 | t3m_01371 | DNA_length     | 1038bp                                                           |          |

|            |           |                |                                                                      |          |
|------------|-----------|----------------|----------------------------------------------------------------------|----------|
| 2572233015 | t3m_01371 | Protein_length | 345aa                                                                |          |
| 2572233015 | t3m_01371 | GC             |                                                                      | 0.69     |
| 2572233016 | t3m_01372 | KEGG_module    | M00361: Nucleotide sugar biosynthesis, eukaryotes                    |          |
| 2572233016 | t3m_01372 | KEGG_module    | M00362: Nucleotide sugar biosynthesis, prokaryotes                   |          |
| 2572233016 | t3m_01372 | Metacyc        | PWY-3821: galactose degradation III                                  |          |
| 2572233016 | t3m_01372 | Metacyc        | PWY-6397: mycolyl-arabinogalactan-peptidoglycan complex biosynthesis |          |
| 2572233016 | t3m_01372 | Metacyc        | PWY-6527: stachyose degradation                                      |          |
| 2572233016 | t3m_01372 | Metacyc        | PWY-6317: galactose degradation I (Leloir pathway)                   |          |
| 2572233016 | t3m_01372 | Metacyc        | COLANSYN-PWY: colanic acid building blocks biosynthesis              |          |
| 2572233016 | t3m_01372 | COG_category   | [M] Cell wall/membrane/envelope biogenesis                           |          |
| 2572233016 | t3m_01372 | COG_category   | [G] Carbohydrate transport and metabolism                            |          |
| 2572233016 | t3m_01372 | COG0451        | Nucleoside-diphosphate-sugar epimerases                              | 6.00E-44 |
| 2572233016 | t3m_01372 | pfam01370      | Epimerase                                                            | 1.20E-38 |
| 2572233016 | t3m_01372 | EC:5.1.3.2     | UDP-glucose 4-epimerase.                                             |          |
| 2572233016 | t3m_01372 | KO:K01784      | UDP-glucose 4-epimerase [EC:5.1.3.2]                                 | 0.00E+00 |
| 2572233016 | t3m_01372 | Locus_type     | CDS                                                                  |          |
| 2572233016 | t3m_01372 | Product_name   | Nucleoside-diphosphate-sugar epimerases                              |          |
| 2572233016 | t3m_01372 | Scaffold       | t3m_contig_70_309_len_20133_read_count_1504061.33                    |          |
| 2572233016 | t3m_01372 | Coordinates    | 18957..19943(-)                                                      |          |
| 2572233016 | t3m_01372 | DNA_length     | 987bp                                                                |          |
| 2572233016 | t3m_01372 | Protein_length | 328aa                                                                |          |
| 2572233016 | t3m_01372 | GC             |                                                                      | 0.7      |
| 2572233017 | t3m_01373 | pfam00709      | Adenylysucc_synt                                                     | 9.00E-19 |
| 2572233017 | t3m_01373 | TIGR00184      | adenylosuccinate synthase                                            | 3.20E-21 |
| 2572233017 | t3m_01373 | Locus_type     | CDS                                                                  |          |
| 2572233017 | t3m_01373 | Product_name   | Adenylosuccinate synthetase                                          |          |
| 2572233017 | t3m_01373 | Scaffold       | t3m_contig_70_317_len_19889_read_count_1752268.34                    |          |
| 2572233017 | t3m_01373 | Coordinates    | 1..360(+)                                                            |          |
| 2572233017 | t3m_01373 | DNA_length     | 360bp                                                                |          |
| 2572233017 | t3m_01373 | Protein_length | 119aa                                                                |          |
| 2572233017 | t3m_01373 | GC             |                                                                      | 0.69     |

|            |           |                |                                                                  |          |
|------------|-----------|----------------|------------------------------------------------------------------|----------|
| 2572233018 | t3m_01374 | COG_category   | [S] Function unknown                                             |          |
| 2572233018 | t3m_01374 | COG2431        | Predicted membrane protein                                       | 3.00E-19 |
| 2572233018 | t3m_01374 | pfam03956      | DUF340                                                           | 2.40E-32 |
| 2572233018 | t3m_01374 | Locus_type     | CDS                                                              |          |
| 2572233018 | t3m_01374 | Product_name   | Predicted membrane protein                                       |          |
| 2572233018 | t3m_01374 | Scaffold       | t3m_contig_70_317_len_19889_read_count_1752268.34                |          |
| 2572233018 | t3m_01374 | Coordinates    | 370..1239(+)                                                     |          |
| 2572233018 | t3m_01374 | DNA_length     | 870bp                                                            |          |
| 2572233018 | t3m_01374 | Protein_length | 289aa                                                            |          |
| 2572233018 | t3m_01374 | GC             |                                                                  | 0.71     |
| 2572233018 | t3m_01374 | Transmembrane  | Yes                                                              |          |
| 2572233019 | t3m_01375 | Locus_type     | tRNA                                                             |          |
| 2572233019 | t3m_01375 | Product_name   | tRNA_Val_CAC                                                     |          |
| 2572233019 | t3m_01375 | Scaffold       | t3m_contig_70_317_len_19889_read_count_1752268.34                |          |
| 2572233019 | t3m_01375 | Coordinates    | 1277..1349(+)                                                    |          |
| 2572233019 | t3m_01375 | DNA_length     | 73bp                                                             |          |
| 2572233019 | t3m_01375 | GC             |                                                                  | 0.67     |
| 2572233020 | t3m_01376 | COG_category   | [S] Function unknown                                             |          |
| 2572233020 | t3m_01376 | COG1814        | Uncharacterized membrane protein                                 | 5.00E-18 |
| 2572233020 | t3m_01376 | pfam01988      | VIT1                                                             | 7.60E-53 |
| 2572233020 | t3m_01376 | TIGR00267      | TIGR00267 family protein                                         | 3.00E-12 |
| 2572233020 | t3m_01376 | Locus_type     | CDS                                                              |          |
| 2572233020 | t3m_01376 | Product_name   | Uncharacterized membrane protein                                 |          |
| 2572233020 | t3m_01376 | Scaffold       | t3m_contig_70_317_len_19889_read_count_1752268.34                |          |
| 2572233020 | t3m_01376 | Coordinates    | 1390..2514(-)                                                    |          |
| 2572233020 | t3m_01376 | DNA_length     | 1125bp                                                           |          |
| 2572233020 | t3m_01376 | Protein_length | 374aa                                                            |          |
| 2572233020 | t3m_01376 | GC             |                                                                  | 0.7      |
| 2572233020 | t3m_01376 | Transmembrane  | Yes                                                              |          |
| 2572233021 | t3m_01377 | COG_category   | [O] Posttranslational modification, protein turnover, chaperones |          |
| 2572233021 | t3m_01377 | COG0425        | Predicted redox protein, regulator of disulfide bond formation   | 1.00E-12 |

|            |           |                |                                                            |                                                                |           |
|------------|-----------|----------------|------------------------------------------------------------|----------------------------------------------------------------|-----------|
| 2572233021 | t3m_01377 | pfam01206      | TusA                                                       |                                                                | 2.80E-18  |
| 2572233021 | t3m_01377 | Locus_type     |                                                            | CDS                                                            |           |
| 2572233021 | t3m_01377 | Product_name   |                                                            | Predicted redox protein, regulator of disulfide bond formation |           |
| 2572233021 | t3m_01377 | Scaffold       |                                                            | t3m_contig_70_317_len_19889_read_count_1752268.34              |           |
| 2572233021 | t3m_01377 | Coordinates    |                                                            | 2663..2917(-)                                                  |           |
| 2572233021 | t3m_01377 | DNA_length     |                                                            | 255bp                                                          |           |
| 2572233021 | t3m_01377 | Protein_length |                                                            | 84aa                                                           |           |
| 2572233021 | t3m_01377 | GC             |                                                            |                                                                | 0.64      |
| 2572233022 | t3m_01378 | KEGG_module    | M00121: Heme biosynthesis, glutamate => protoheme/siroheme |                                                                |           |
| 2572233022 | t3m_01378 | Metacyc        | PWY-5189: tetrapyrrole biosynthesis II (from glycine)      |                                                                |           |
| 2572233022 | t3m_01378 | Metacyc        | PWY-5188: tetrapyrrole biosynthesis I (from glutamate)     |                                                                |           |
| 2572233022 | t3m_01378 | COG_category   | [H] Coenzyme transport and metabolism                      |                                                                |           |
| 2572233022 | t3m_01378 | COG0113        | Delta-aminolevulinic acid dehydratase                      |                                                                | 4.00E-125 |
| 2572233022 | t3m_01378 | pfam00490      | ALAD                                                       |                                                                | 0.00E+00  |
| 2572233022 | t3m_01378 | EC:4.2.1.24    | Porphobilinogen synthase.                                  |                                                                |           |
| 2572233022 | t3m_01378 | KO:K01698      | porphobilinogen synthase [EC:4.2.1.24]                     |                                                                | 0.00E+00  |
| 2572233022 | t3m_01378 | Locus_type     |                                                            | CDS                                                            |           |
| 2572233022 | t3m_01378 | Product_name   |                                                            | porphobilinogen synthase (EC 4.2.1.24)                         |           |
| 2572233022 | t3m_01378 | Scaffold       |                                                            | t3m_contig_70_317_len_19889_read_count_1752268.34              |           |
| 2572233022 | t3m_01378 | Coordinates    |                                                            | 3044..4063(-)                                                  |           |
| 2572233022 | t3m_01378 | DNA_length     |                                                            | 1020bp                                                         |           |
| 2572233022 | t3m_01378 | Protein_length |                                                            | 339aa                                                          |           |
| 2572233022 | t3m_01378 | GC             |                                                            |                                                                | 0.7       |
| 2572233023 | t3m_01379 | COG_category   | [H] Coenzyme transport and metabolism                      |                                                                |           |
| 2572233023 | t3m_01379 | COG1587        | Uroporphyrinogen-III synthase                              |                                                                | 3.00E-18  |
| 2572233023 | t3m_01379 | pfam02602      | HEM4                                                       |                                                                | 4.30E-32  |
| 2572233023 | t3m_01379 | Locus_type     |                                                            | CDS                                                            |           |
| 2572233023 | t3m_01379 | Product_name   |                                                            | Uroporphyrinogen-III synthase                                  |           |
| 2572233023 | t3m_01379 | Scaffold       |                                                            | t3m_contig_70_317_len_19889_read_count_1752268.34              |           |
| 2572233023 | t3m_01379 | Coordinates    |                                                            | 4050..4814(-)                                                  |           |
| 2572233023 | t3m_01379 | DNA_length     |                                                            | 765bp                                                          |           |
| 2572233023 | t3m_01379 | Protein_length |                                                            | 254aa                                                          |           |



|            |           |                |                                                                         |           |
|------------|-----------|----------------|-------------------------------------------------------------------------|-----------|
| 2572233023 | t3m_01379 | GC             |                                                                         | 0.7       |
| 2572233024 | t3m_01380 | KEGG_module    | M00121: Heme biosynthesis, glutamate => protoheme/siroheme              |           |
| 2572233024 | t3m_01380 | Metacyc        | PWY-5189: tetrapyrrole biosynthesis II (from glycine)                   |           |
| 2572233024 | t3m_01380 | Metacyc        | PWY-5188: tetrapyrrole biosynthesis I (from glutamate)                  |           |
| 2572233024 | t3m_01380 | IMG_pathway    | 80: Uroporphyrinogen biosynthesis                                       |           |
| 2572233024 | t3m_01380 | COG_category   | [H] Coenzyme transport and metabolism                                   |           |
| 2572233024 | t3m_01380 | COG0181        | Porphobilinogen deaminase                                               | 4.00E-79  |
| 2572233024 | t3m_01380 | pfam01379      | Porphobil_deam                                                          | 2.30E-56  |
| 2572233024 | t3m_01380 | pfam03900      | Porphobil_deamC                                                         | 3.20E-15  |
| 2572233024 | t3m_01380 | EC:2.5.1.61    | Hydroxymethylbilane synthase.                                           |           |
| 2572233024 | t3m_01380 | TIGR00212      | porphobilinogen deaminase                                               | 7.20E-87  |
| 2572233024 | t3m_01380 | KO:K01749      | hydroxymethylbilane synthase [EC:2.5.1.61]                              | 0.00E+00  |
| 2572233024 | t3m_01380 | ITERM:00116    | hydroxymethylbilane synthase (EC 2.5.1.61)                              |           |
| 2572233024 | t3m_01380 | Locus_type     | CDS                                                                     |           |
| 2572233024 | t3m_01380 | Product_name   | hydroxymethylbilane synthase (EC 2.5.1.61)                              |           |
| 2572233024 | t3m_01380 | Scaffold       | t3m_contig_70_317_len_19889_read_count_1752268.34                       |           |
| 2572233024 | t3m_01380 | Coordinates    | 4822..5730(-)                                                           |           |
| 2572233024 | t3m_01380 | DNA_length     | 909bp                                                                   |           |
| 2572233024 | t3m_01380 | Protein_length | 302aa                                                                   |           |
| 2572233024 | t3m_01380 | GC             |                                                                         | 0.71      |
| 2572233025 | t3m_01381 | Metacyc        | P381-PWY: adenosylcobalamin biosynthesis II (late cobalt incorporation) |           |
| 2572233025 | t3m_01381 | Metacyc        | PWY-5507: adenosylcobalamin biosynthesis I (early cobalt insertion)     |           |
| 2572233025 | t3m_01381 | COG_category   | [H] Coenzyme transport and metabolism                                   |           |
| 2572233025 | t3m_01381 | COG1797        | Cobyric acid a,c-diamide synthase                                       | 1.00E-116 |
| 2572233025 | t3m_01381 | pfam01656      | CbiA                                                                    | 1.60E-15  |
| 2572233025 | t3m_01381 | pfam07685      | GATase_3                                                                | 1.20E-29  |
| 2572233025 | t3m_01381 | EC:6.3.5.11    | Cobyrate a,c-diamide synthase (glutamine-hydrolyzing).                  |           |
| 2572233025 | t3m_01381 | EC:6.3.5.9     | Hydrogenobyric acid a,c-diamide synthase (glutamine-hydrolyzing).       |           |
| 2572233025 | t3m_01381 | TIGR00379      | cobyric acid a,c-diamide synthase                                       | 1.00E-118 |
| 2572233025 | t3m_01381 | KO:K02224      | cobyric acid a,c-diamide synthase [EC:6.3.5.9 6.3.5.11]                 | 0.00E+00  |
| 2572233025 | t3m_01381 | Locus_type     | CDS                                                                     |           |
| 2572233025 | t3m_01381 | Product_name   | hydrogenobyric acid a,c-diamide synthase (glutamine-hydrolyzing) (EC    |           |

|            |           |                |                                                                           |          |
|------------|-----------|----------------|---------------------------------------------------------------------------|----------|
| 2572233025 | t3m_01381 | Scaffold       | t3m_contig_70_317_len_19889_read_count_1752268.34                         |          |
| 2572233025 | t3m_01381 | Coordinates    | 5752..7146(-)                                                             |          |
| 2572233025 | t3m_01381 | DNA_length     | 1395bp                                                                    |          |
| 2572233025 | t3m_01381 | Protein_length | 464aa                                                                     |          |
| 2572233025 | t3m_01381 | GC             |                                                                           | 0.67     |
|            |           |                |                                                                           |          |
| 2572233026 | t3m_01382 | COG_category   | [H] Coenzyme transport and metabolism                                     |          |
| 2572233026 | t3m_01382 | COG0007        | Uroporphyrinogen-III methylase                                            | 1.00E-72 |
| 2572233026 | t3m_01382 | pfam00590      | TP_methylase                                                              | 1.10E-47 |
| 2572233026 | t3m_01382 | TIGR01469      | uroporphyrin-III C-methyltransferase                                      | 2.30E-86 |
| 2572233026 | t3m_01382 | Locus_type     | CDS                                                                       |          |
| 2572233026 | t3m_01382 | Product_name   | uroporphyrin-III C-methyltransferase                                      |          |
| 2572233026 | t3m_01382 | Scaffold       | t3m_contig_70_317_len_19889_read_count_1752268.34                         |          |
| 2572233026 | t3m_01382 | Coordinates    | 7143..7997(-)                                                             |          |
| 2572233026 | t3m_01382 | DNA_length     | 855bp                                                                     |          |
| 2572233026 | t3m_01382 | Protein_length | 284aa                                                                     |          |
| 2572233026 | t3m_01382 | GC             |                                                                           | 0.66     |
|            |           |                |                                                                           |          |
| 2572233027 | t3m_01383 | KEGG_module    | M00121: Heme biosynthesis, glutamate => protoheme/siroheme                |          |
| 2572233027 | t3m_01383 | Metacyc        | PWY-5194: siroheme biosynthesis                                           |          |
| 2572233027 | t3m_01383 | COG_category   | [H] Coenzyme transport and metabolism                                     |          |
| 2572233027 | t3m_01383 | COG1648        | Siroheme synthase (precorrin-2 oxidase/ferrochelatase domain)             | 6.00E-26 |
| 2572233027 | t3m_01383 | pfam13241      | NAD_binding_7                                                             | 4.80E-09 |
| 2572233027 | t3m_01383 | EC:1.3.1.76    | Precorrin-2 dehydrogenase.                                                |          |
| 2572233027 | t3m_01383 | EC:4.99.1.4    | Sirohydrochlorin ferrochelatase.                                          |          |
| 2572233027 | t3m_01383 | TIGR01470      | siroheme synthase, N-terminal domain                                      | 9.00E-26 |
| 2572233027 | t3m_01383 | KO:K02304      | precorrin-2 dehydrogenase / sirohydrochlorin ferrochelatase [EC:1.3.1.76] | 2.10E-17 |
| 2572233027 | t3m_01383 | Locus_type     | CDS                                                                       |          |
| 2572233027 | t3m_01383 | Product_name   | siroheme synthase, N-terminal domain                                      |          |
| 2572233027 | t3m_01383 | Scaffold       | t3m_contig_70_317_len_19889_read_count_1752268.34                         |          |
| 2572233027 | t3m_01383 | Coordinates    | 8000..8659(-)                                                             |          |
| 2572233027 | t3m_01383 | DNA_length     | 660bp                                                                     |          |
| 2572233027 | t3m_01383 | Protein_length | 219aa                                                                     |          |
| 2572233027 | t3m_01383 | GC             |                                                                           | 0.7      |

|            |           |                |                                                                          |          |
|------------|-----------|----------------|--------------------------------------------------------------------------|----------|
| 2572233028 | t3m_01384 | COG_category   | [P] Inorganic ion transport and metabolism                               |          |
| 2572233028 | t3m_01384 | COG2920        | Dissimilatory sulfite reductase (desulfoviridin), gamma subunit          | 1.00E-34 |
| 2572233028 | t3m_01384 | pfam04358      | DsrC                                                                     | 4.90E-34 |
| 2572233028 | t3m_01384 | EC:2.8.1.-     | Transferases. Transferring sulfur-containing groups. Sulfurtransferases. |          |
| 2572233028 | t3m_01384 | TIGR03342      | sulfur relay protein, TusE/DsrC/DsvC family                              | 6.10E-35 |
| 2572233028 | t3m_01384 | KO:K11179      | tRNA 2-thiouridine synthesizing protein E [EC:2.8.1.-]                   | 2.80E-45 |
| 2572233028 | t3m_01384 | Locus_type     | CDS                                                                      |          |
| 2572233028 | t3m_01384 | Product_name   | sulfur relay protein, TusE/DsrC/DsvC family                              |          |
| 2572233028 | t3m_01384 | Scaffold       | t3m_contig_70_317_len_19889_read_count_1752268.34                        |          |
| 2572233028 | t3m_01384 | Coordinates    | 8821..9156(+)                                                            |          |
| 2572233028 | t3m_01384 | DNA_length     | 336bp                                                                    |          |
| 2572233028 | t3m_01384 | Protein_length | 111aa                                                                    |          |
| 2572233028 | t3m_01384 | GC             |                                                                          | 0.64     |
| 2572233029 | t3m_01385 | COG_category   | [R] General function prediction only                                     |          |
| 2572233029 | t3m_01385 | COG2044        | Predicted peroxiredoxins                                                 | 9.00E-18 |
| 2572233029 | t3m_01385 | pfam02635      | DrsE                                                                     | 2.60E-10 |
| 2572233029 | t3m_01385 | Locus_type     | CDS                                                                      |          |
| 2572233029 | t3m_01385 | Product_name   | Predicted peroxiredoxins                                                 |          |
| 2572233029 | t3m_01385 | Scaffold       | t3m_contig_70_317_len_19889_read_count_1752268.34                        |          |
| 2572233029 | t3m_01385 | Coordinates    | 9259..9600(-)                                                            |          |
| 2572233029 | t3m_01385 | DNA_length     | 342bp                                                                    |          |
| 2572233029 | t3m_01385 | Protein_length | 113aa                                                                    |          |
| 2572233029 | t3m_01385 | GC             |                                                                          | 0.64     |
| 2572233030 | t3m_01386 | COG_category   | [C] Energy production and conversion                                     |          |
| 2572233030 | t3m_01386 | COG0247        | Fe-S oxidoreductase                                                      | 5.00E-37 |
| 2572233030 | t3m_01386 | pfam13183      | Fer4_8                                                                   | 7.00E-12 |
| 2572233030 | t3m_01386 | pfam02754      | CCG                                                                      | 1.30E-09 |
| 2572233030 | t3m_01386 | Locus_type     | CDS                                                                      |          |
| 2572233030 | t3m_01386 | Product_name   | Fe-S oxidoreductase                                                      |          |
| 2572233030 | t3m_01386 | Scaffold       | t3m_contig_70_317_len_19889_read_count_1752268.34                        |          |
| 2572233030 | t3m_01386 | Coordinates    | 9701..11116(-)                                                           |          |

|            |           |                |                                                                           |          |
|------------|-----------|----------------|---------------------------------------------------------------------------|----------|
| 2572233030 | t3m_01386 | DNA_length     | 1416bp                                                                    |          |
| 2572233030 | t3m_01386 | Protein_length | 471aa                                                                     |          |
| 2572233030 | t3m_01386 | GC             |                                                                           | 0.67     |
| 2572233031 | t3m_01387 | KEGG_module    | M00530: Dissimilatory nitrate reduction, nitrate => ammonia               |          |
| 2572233031 | t3m_01387 | KEGG_module    | M00529: Denitrification, nitrate => nitrogen                              |          |
| 2572233031 | t3m_01387 | Metacyc        | PWY-6748: nitrate reduction VII (denitrification)                         |          |
| 2572233031 | t3m_01387 | Metacyc        | DENITRIFICATION-PWY: nitrate reduction I (denitrification)                |          |
| 2572233031 | t3m_01387 | COG_category   | [C] Energy production and conversion                                      |          |
| 2572233031 | t3m_01387 | COG2181        | Nitrate reductase gamma subunit                                           | 3.00E-23 |
| 2572233031 | t3m_01387 | pfam02665      | Nitrate_red_gam                                                           | 5.10E-32 |
| 2572233031 | t3m_01387 | EC:1.7.99.4    | Nitrate reductase.                                                        |          |
| 2572233031 | t3m_01387 | KO:K00374      | nitrate reductase 1, gamma subunit [EC:1.7.99.4]                          | 0.00E+00 |
| 2572233031 | t3m_01387 | Locus_type     | CDS                                                                       |          |
| 2572233031 | t3m_01387 | Product_name   | Nitrate reductase gamma subunit                                           |          |
| 2572233031 | t3m_01387 | Scaffold       | t3m_contig_70_317_len_19889_read_count_1752268.34                         |          |
| 2572233031 | t3m_01387 | Coordinates    | 11123..11902(-)                                                           |          |
| 2572233031 | t3m_01387 | DNA_length     | 780bp                                                                     |          |
| 2572233031 | t3m_01387 | Protein_length | 259aa                                                                     |          |
| 2572233031 | t3m_01387 | GC             |                                                                           | 0.63     |
| 2572233031 | t3m_01387 | Transmembrane  | Yes                                                                       |          |
| 2572233032 | t3m_01388 | Metacyc        | P224-PWY: sulfate reduction V (dissimilatory)                             |          |
| 2572233032 | t3m_01388 | COG_category   | [C] Energy production and conversion                                      |          |
| 2572233032 | t3m_01388 | COG2221        | Dissimilatory sulfite reductase (desulfoviridin), alpha and beta subunits | 5.00E-64 |
| 2572233032 | t3m_01388 | pfam01077      | NIR_SIR                                                                   | 3.00E-25 |
| 2572233032 | t3m_01388 | pfam03460      | NIR_SIR_ferr                                                              | 1.50E-06 |
| 2572233032 | t3m_01388 | EC:1.8.99.3    | Hydrogensulfite reductase.                                                |          |
| 2572233032 | t3m_01388 | TIGR02066      | sulfite reductase, dissimilatory-type beta subunit                        | 3.60E-99 |
| 2572233032 | t3m_01388 | KO:K11181      | sulfite reductase, dissimilatory-type beta subunit [EC:1.8.99.3]          | 0.00E+00 |
| 2572233032 | t3m_01388 | ITERM:06636    | dissimilatory sulfite reductase beta subunit (EC 1.8.99.1)                |          |
| 2572233032 | t3m_01388 | Locus_type     | CDS                                                                       |          |
| 2572233032 | t3m_01388 | Product_name   | dissimilatory sulfite reductase beta subunit (EC 1.8.99.1)                |          |
| 2572233032 | t3m_01388 | Scaffold       | t3m_contig_70_317_len_19889_read_count_1752268.34                         |          |

|            |           |                |                                                                           |          |
|------------|-----------|----------------|---------------------------------------------------------------------------|----------|
| 2572233032 | t3m_01388 | Coordinates    | 11907..13013(-)                                                           |          |
| 2572233032 | t3m_01388 | DNA_length     | 1107bp                                                                    |          |
| 2572233032 | t3m_01388 | Protein_length | 368aa                                                                     |          |
| 2572233032 | t3m_01388 | GC             |                                                                           | 0.65     |
| 2572233033 | t3m_01389 | Metacyc        | P224-PWY: sulfate reduction V (dissimilatory)                             |          |
| 2572233033 | t3m_01389 | COG_category   | [C] Energy production and conversion                                      |          |
| 2572233033 | t3m_01389 | COG2221        | Dissimilatory sulfite reductase (desulfoviridin), alpha and beta subunits | 2.00E-53 |
| 2572233033 | t3m_01389 | pfam01077      | NIR_SIR                                                                   | 2.90E-16 |
| 2572233033 | t3m_01389 | EC:1.8.99.3    | Hydrogensulfite reductase.                                                |          |
| 2572233033 | t3m_01389 | TIGR02064      | sulfite reductase, dissimilatory-type alpha subunit                       | 7.50E-96 |
| 2572233033 | t3m_01389 | KO:K11180      | sulfite reductase, dissimilatory-type alpha subunit [EC:1.8.99.3]         | 0.00E+00 |
| 2572233033 | t3m_01389 | ITERM:06635    | dissimilatory sulfite reductase alpha subunit (EC 1.8.99.1)               |          |
| 2572233033 | t3m_01389 | Locus_type     | CDS                                                                       |          |
| 2572233033 | t3m_01389 | Product_name   | dissimilatory sulfite reductase alpha subunit (EC 1.8.99.1)               |          |
| 2572233033 | t3m_01389 | Scaffold       | t3m_contig_70_317_len_19889_read_count_1752268.34                         |          |
| 2572233033 | t3m_01389 | Coordinates    | 13040..14212(-)                                                           |          |
| 2572233033 | t3m_01389 | DNA_length     | 1173bp                                                                    |          |
| 2572233033 | t3m_01389 | Protein_length | 390aa                                                                     |          |
| 2572233033 | t3m_01389 | GC             |                                                                           | 0.65     |
| 2572233034 | t3m_01390 | Locus_type     | CDS                                                                       |          |
| 2572233034 | t3m_01390 | Product_name   | hypothetical protein                                                      |          |
| 2572233034 | t3m_01390 | Scaffold       | t3m_contig_70_317_len_19889_read_count_1752268.34                         |          |
| 2572233034 | t3m_01390 | Coordinates    | 14529..15206(+)                                                           |          |
| 2572233034 | t3m_01390 | DNA_length     | 678bp                                                                     |          |
| 2572233034 | t3m_01390 | Protein_length | 225aa                                                                     |          |
| 2572233034 | t3m_01390 | GC             |                                                                           | 0.64     |
| 2572233034 | t3m_01390 | Transmembrane  | Yes                                                                       |          |
| 2572233035 | t3m_01391 | KEGG_module    | M00018: Threonine biosynthesis, aspartate => homoserine => threonine      |          |
| 2572233035 | t3m_01391 | Metacyc        | HOMOSER-THRESYN-PWY: threonine biosynthesis from homoserine               |          |
| 2572233035 | t3m_01391 | COG_category   | [E] Amino acid transport and metabolism                                   |          |
| 2572233035 | t3m_01391 | COG0498        | Threonine synthase                                                        | 3.00E-72 |

|            |           |                |                                                   |      |          |
|------------|-----------|----------------|---------------------------------------------------|------|----------|
| 2572233035 | t3m_01391 | pfam00291      | PALP                                              |      | 6.90E-70 |
| 2572233035 | t3m_01391 | EC:4.2.3.1     | Threonine synthase.                               |      |          |
| 2572233035 | t3m_01391 | TIGR00260      | threonine synthase                                |      | 1.10E-51 |
| 2572233035 | t3m_01391 | KO:K01733      | threonine synthase [EC:4.2.3.1]                   |      | 0.00E+00 |
| 2572233035 | t3m_01391 | Locus_type     | CDS                                               |      |          |
| 2572233035 | t3m_01391 | Product_name   | L-threonine synthase (EC 4.2.3.1)                 |      |          |
| 2572233035 | t3m_01391 | Scaffold       | t3m_contig_70_317_len_19889_read_count_1752268.34 |      |          |
| 2572233035 | t3m_01391 | Coordinates    | 15283..16473(+)                                   |      |          |
| 2572233035 | t3m_01391 | DNA_length     | 1191bp                                            |      |          |
| 2572233035 | t3m_01391 | Protein_length | 396aa                                             |      |          |
| 2572233035 | t3m_01391 | GC             |                                                   | 0.7  |          |
|            |           |                |                                                   |      |          |
| 2572233036 | t3m_01392 | COG_category   | [R] General function prediction only              |      |          |
| 2572233036 | t3m_01392 | COG2085        | Predicted dinucleotide-binding enzymes            |      | 5.00E-29 |
| 2572233036 | t3m_01392 | pfam03807      | F420_oxidored                                     |      | 5.70E-12 |
| 2572233036 | t3m_01392 | Locus_type     | CDS                                               |      |          |
| 2572233036 | t3m_01392 | Product_name   | Predicted dinucleotide-binding enzymes            |      |          |
| 2572233036 | t3m_01392 | Scaffold       | t3m_contig_70_317_len_19889_read_count_1752268.34 |      |          |
| 2572233036 | t3m_01392 | Coordinates    | 16504..17151(-)                                   |      |          |
| 2572233036 | t3m_01392 | DNA_length     | 648bp                                             |      |          |
| 2572233036 | t3m_01392 | Protein_length | 215aa                                             |      |          |
| 2572233036 | t3m_01392 | GC             |                                                   | 0.66 |          |
|            |           |                |                                                   |      |          |
| 2572233037 | t3m_01393 | COG_category   | [V] Defense mechanisms                            |      |          |
| 2572233037 | t3m_01393 | COG1403        | Restriction endonuclease                          |      | 2.00E-07 |
| 2572233037 | t3m_01393 | pfam01844      | HNH                                               |      | 1.40E-11 |
| 2572233037 | t3m_01393 | Locus_type     | CDS                                               |      |          |
| 2572233037 | t3m_01393 | Product_name   | Restriction endonuclease                          |      |          |
| 2572233037 | t3m_01393 | Scaffold       | t3m_contig_70_317_len_19889_read_count_1752268.34 |      |          |
| 2572233037 | t3m_01393 | Coordinates    | 17175..17651(-)                                   |      |          |
| 2572233037 | t3m_01393 | DNA_length     | 477bp                                             |      |          |
| 2572233037 | t3m_01393 | Protein_length | 158aa                                             |      |          |
| 2572233037 | t3m_01393 | GC             |                                                   | 0.67 |          |

|            |           |                |                                                   |          |
|------------|-----------|----------------|---------------------------------------------------|----------|
| 2572233038 | t3m_01394 | COG_category   | [E] Amino acid transport and metabolism           |          |
| 2572233038 | t3m_01394 | COG0436        | Aspartate/tyrosine/aromatic aminotransferase      | 1.00E-14 |
| 2572233038 | t3m_01394 | pfam00155      | Aminotran_1_2                                     | 1.30E-05 |
| 2572233038 | t3m_01394 | Locus_type     | CDS                                               |          |
| 2572233038 | t3m_01394 | Product_name   | Aspartate/tyrosine/aromatic aminotransferase      |          |
| 2572233038 | t3m_01394 | Scaffold       | t3m_contig_70_317_len_19889_read_count_1752268.34 |          |
| 2572233038 | t3m_01394 | Coordinates    | 17796..18779(+)                                   |          |
| 2572233038 | t3m_01394 | DNA_length     | 984bp                                             |          |
| 2572233038 | t3m_01394 | Protein_length | 327aa                                             |          |
| 2572233038 | t3m_01394 | GC             |                                                   | 0.7      |
|            |           |                |                                                   |          |
| 2572233039 | t3m_01395 | Locus_type     | CDS                                               |          |
| 2572233039 | t3m_01395 | Product_name   | hypothetical protein                              |          |
| 2572233039 | t3m_01395 | Scaffold       | t3m_contig_70_317_len_19889_read_count_1752268.34 |          |
| 2572233039 | t3m_01395 | Coordinates    | 18792..19076(-)                                   |          |
| 2572233039 | t3m_01395 | DNA_length     | 285bp                                             |          |
| 2572233039 | t3m_01395 | Protein_length | 94aa                                              |          |
| 2572233039 | t3m_01395 | GC             |                                                   | 0.68     |
|            |           |                |                                                   |          |
| 2572233040 | t3m_01396 | pfam00202      | Aminotran_3                                       | 1.60E-39 |
| 2572233040 | t3m_01396 | Locus_type     | CDS                                               |          |
| 2572233040 | t3m_01396 | Product_name   | Aminotransferase class-III                        |          |
| 2572233040 | t3m_01396 | Scaffold       | t3m_contig_70_317_len_19889_read_count_1752268.34 |          |
| 2572233040 | t3m_01396 | Coordinates    | 19194..19886(+)                                   |          |
| 2572233040 | t3m_01396 | DNA_length     | 693bp                                             |          |
| 2572233040 | t3m_01396 | Protein_length | 231aa                                             |          |
| 2572233040 | t3m_01396 | GC             |                                                   | 0.66     |
|            |           |                |                                                   |          |
| 2572233041 | t3m_01397 | Locus_type     | CDS                                               |          |
| 2572233041 | t3m_01397 | Product_name   | hypothetical protein                              |          |
| 2572233041 | t3m_01397 | Scaffold       | t3m_contig_70_337_len_19247_read_count_1552515.35 |          |
| 2572233041 | t3m_01397 | Coordinates    | 3..137(-)                                         |          |
| 2572233041 | t3m_01397 | DNA_length     | 135bp                                             |          |
| 2572233041 | t3m_01397 | Protein_length | 45aa                                              |          |

|            |           |                |                                                                        |           |
|------------|-----------|----------------|------------------------------------------------------------------------|-----------|
| 2572233041 | t3m_01397 | GC             |                                                                        | 0.68      |
| 2572233042 | t3m_01398 | KEGG_module    | M00184: RNA polymerase, archaea                                        |           |
| 2572233042 | t3m_01398 | COG_category   | [K] Transcription                                                      |           |
| 2572233042 | t3m_01398 | COG1761        | DNA-directed RNA polymerase, subunit L                                 | 1.00E-11  |
| 2572233042 | t3m_01398 | pfam13656      | RNA_pol_L_2                                                            | 2.80E-14  |
| 2572233042 | t3m_01398 | EC:2.7.7.6     | DNA-directed RNA polymerase.                                           |           |
| 2572233042 | t3m_01398 | KO:K03056      | DNA-directed RNA polymerase subunit L [EC:2.7.7.6]                     | 1.80E-17  |
| 2572233042 | t3m_01398 | ITERM:01879    | DNA-directed RNA polymerase, subunit L (EC 2.7.7.6)                    |           |
| 2572233042 | t3m_01398 | Locus_type     | CDS                                                                    |           |
| 2572233042 | t3m_01398 | Product_name   | DNA-directed RNA polymerase, subunit L (EC 2.7.7.6)                    |           |
| 2572233042 | t3m_01398 | Scaffold       | t3m_contig_70_337_len_19247_read_count_1552515.35                      |           |
| 2572233042 | t3m_01398 | Coordinates    | 152..439(-)                                                            |           |
| 2572233042 | t3m_01398 | DNA_length     | 288bp                                                                  |           |
| 2572233042 | t3m_01398 | Protein_length | 95aa                                                                   |           |
| 2572233042 | t3m_01398 | GC             |                                                                        | 0.62      |
| 2572233043 | t3m_01399 | KEGG_module    | M00048: Inosine monophosphate biosynthesis, PRPP + glutamine => IMP    |           |
| 2572233043 | t3m_01399 | Metacyc        | PWY-6121: 5-aminoimidazole ribonucleotide biosynthesis I               |           |
| 2572233043 | t3m_01399 | Metacyc        | PWY-6122: 5-aminoimidazole ribonucleotide biosynthesis II              |           |
| 2572233043 | t3m_01399 | Metacyc        | PWY-6277: superpathway of 5-aminoimidazole ribonucleotide biosynthesis |           |
| 2572233043 | t3m_01399 | IMG_pathway    | 297: 5-amino-1-(5-phospho-D-ribosyl)imidazole synthesis                |           |
| 2572233043 | t3m_01399 | COG_category   | [F] Nucleotide transport and metabolism                                |           |
| 2572233043 | t3m_01399 | COG0151        | Phosphoribosylamine-glycine ligase                                     | 2.00E-102 |
| 2572233043 | t3m_01399 | pfam02844      | GARS_N                                                                 | 1.70E-25  |
| 2572233043 | t3m_01399 | pfam01071      | GARS_A                                                                 | 4.70E-49  |
| 2572233043 | t3m_01399 | pfam02843      | GARS_C                                                                 | 2.90E-10  |
| 2572233043 | t3m_01399 | EC:6.3.4.13    | Phosphoribosylamine--glycine ligase.                                   |           |
| 2572233043 | t3m_01399 | TIGR00877      | phosphoribosylamine--glycine ligase                                    | 9.00E-113 |
| 2572233043 | t3m_01399 | KO:K01945      | phosphoribosylamine--glycine ligase [EC:6.3.4.13]                      | 0.00E+00  |
| 2572233043 | t3m_01399 | ITERM:01300    | phosphoribosylamine--glycine ligase (EC 6.3.4.13)                      |           |
| 2572233043 | t3m_01399 | Locus_type     | CDS                                                                    |           |
| 2572233043 | t3m_01399 | Product_name   | phosphoribosylamine--glycine ligase (EC 6.3.4.13)                      |           |
| 2572233043 | t3m_01399 | Scaffold       | t3m_contig_70_337_len_19247_read_count_1552515.35                      |           |



|            |           |                |                                                                        |           |
|------------|-----------|----------------|------------------------------------------------------------------------|-----------|
| 2572233043 | t3m_01399 | Coordinates    | 572..1978(+)                                                           |           |
| 2572233043 | t3m_01399 | DNA_length     | 1407bp                                                                 |           |
| 2572233043 | t3m_01399 | Protein_length | 468aa                                                                  |           |
| 2572233043 | t3m_01399 | GC             |                                                                        | 0.71      |
| 2572233044 | t3m_01400 | COG_category   | [K] Transcription                                                      |           |
| 2572233044 | t3m_01400 | COG1594        | DNA-directed RNA polymerase, subunit M/Transcription elongation factor | 4.00E-15  |
| 2572233044 | t3m_01400 | pfam01096      | TFIIS_C                                                                | 4.10E-18  |
| 2572233044 | t3m_01400 | TIGR01384      | transcription factor S, archaeal                                       | 6.20E-24  |
| 2572233044 | t3m_01400 | KO:K03057      | transcription elongation factor                                        | 3.50E-18  |
| 2572233044 | t3m_01400 | Locus_type     | CDS                                                                    |           |
| 2572233044 | t3m_01400 | Product_name   | transcription factor S, archaeal                                       |           |
| 2572233044 | t3m_01400 | Scaffold       | t3m_contig_70_337_len_19247_read_count_1552515.35                      |           |
| 2572233044 | t3m_01400 | Coordinates    | 2061..2345(+)                                                          |           |
| 2572233044 | t3m_01400 | DNA_length     | 285bp                                                                  |           |
| 2572233044 | t3m_01400 | Protein_length | 94aa                                                                   |           |
| 2572233044 | t3m_01400 | GC             |                                                                        | 0.71      |
| 2572233045 | t3m_01401 | KEGG_module    | M00360: Aminoacyl-tRNA biosynthesis, prokaryotes                       |           |
| 2572233045 | t3m_01401 | KEGG_module    | M00359: Aminoacyl-tRNA biosynthesis, eukaryotes                        |           |
| 2572233045 | t3m_01401 | Metacyc        | TRNA-CHARGING-PWY: tRNA charging                                       |           |
| 2572233045 | t3m_01401 | IMG_pathway    | 499: L-asparagine ligation to tRNA(Asn)                                |           |
| 2572233045 | t3m_01401 | COG_category   | [J] Translation, ribosomal structure and biogenesis                    |           |
| 2572233045 | t3m_01401 | COG0017        | Aspartyl/asparaginyl-tRNA synthetases                                  | 2.00E-123 |
| 2572233045 | t3m_01401 | pfam01336      | tRNA_anti-codon                                                        | 6.30E-12  |
| 2572233045 | t3m_01401 | pfam00152      | tRNA-synt_2                                                            | 7.50E-72  |
| 2572233045 | t3m_01401 | EC:6.1.1.22    | Asparagine--tRNA ligase.                                               |           |
| 2572233045 | t3m_01401 | TIGR00457      | asparaginyl-tRNA synthetase                                            | 4.50E-116 |
| 2572233045 | t3m_01401 | KO:K01893      | asparaginyl-tRNA synthetase [EC:6.1.1.22]                              | 0.00E+00  |
| 2572233045 | t3m_01401 | ITERM:00392    | asparaginyl-tRNA synthetase (EC 6.1.1.22)                              |           |
| 2572233045 | t3m_01401 | Locus_type     | CDS                                                                    |           |
| 2572233045 | t3m_01401 | Product_name   | asparaginyl-tRNA synthetase (EC 6.1.1.22)                              |           |
| 2572233045 | t3m_01401 | Scaffold       | t3m_contig_70_337_len_19247_read_count_1552515.35                      |           |
| 2572233045 | t3m_01401 | Coordinates    | 2342..3646(+)                                                          |           |

|            |           |                |                                                                            |          |
|------------|-----------|----------------|----------------------------------------------------------------------------|----------|
| 2572233045 | t3m_01401 | DNA_length     | 1305bp                                                                     |          |
| 2572233045 | t3m_01401 | Protein_length | 434aa                                                                      |          |
| 2572233045 | t3m_01401 | GC             |                                                                            | 0.68     |
| 2572233046 | t3m_01402 | pfam13673      | Acetyltransf_10                                                            | 4.10E-15 |
| 2572233046 | t3m_01402 | Locus_type     | CDS                                                                        |          |
| 2572233046 | t3m_01402 | Product_name   | Acetyltransferase (GNAT) domain                                            |          |
| 2572233046 | t3m_01402 | Scaffold       | t3m_contig_70_337_len_19247_read_count_1552515.35                          |          |
| 2572233046 | t3m_01402 | Coordinates    | 3749..4282(+)                                                              |          |
| 2572233046 | t3m_01402 | DNA_length     | 534bp                                                                      |          |
| 2572233046 | t3m_01402 | Protein_length | 177aa                                                                      |          |
| 2572233046 | t3m_01402 | GC             |                                                                            | 0.69     |
| 2572233047 | t3m_01403 | Locus_type     | CDS                                                                        |          |
| 2572233047 | t3m_01403 | Product_name   | hypothetical protein                                                       |          |
| 2572233047 | t3m_01403 | Scaffold       | t3m_contig_70_337_len_19247_read_count_1552515.35                          |          |
| 2572233047 | t3m_01403 | Coordinates    | 4279..5310(-)                                                              |          |
| 2572233047 | t3m_01403 | DNA_length     | 1032bp                                                                     |          |
| 2572233047 | t3m_01403 | Protein_length | 343aa                                                                      |          |
| 2572233047 | t3m_01403 | GC             |                                                                            | 0.71     |
| 2572233048 | t3m_01404 | KEGG_module    | M00049: Adenine ribonucleotide biosynthesis, IMP => ADP,ATP                |          |
| 2572233048 | t3m_01404 | KEGG_module    | M00002: Glycolysis, core module involving three-carbon compounds           |          |
| 2572233048 | t3m_01404 | KEGG_module    | M00050: Guanine ribonucleotide biosynthesis IMP => GDP,GTP                 |          |
| 2572233048 | t3m_01404 | KEGG_module    | M00001: Glycolysis (Embden-Meyerhof pathway), glucose => pyruvate          |          |
| 2572233048 | t3m_01404 | Metacyc        | PWY-5723: Rubisco shunt                                                    |          |
| 2572233048 | t3m_01404 | Metacyc        | ANARESP1-PWY: respiration (anaerobic)                                      |          |
| 2572233048 | t3m_01404 | Metacyc        | NPGLUCAT-PWY: Entner-Doudoroff pathway II (non-phosphorylative)            |          |
| 2572233048 | t3m_01404 | Metacyc        | PWY-6142: gluconeogenesis II (<i>Methanobacterium thermoautotrophicum</i>) |          |
| 2572233048 | t3m_01404 | Metacyc        | ANAGLYCOLYSIS-PWY: glycolysis III (glucokinase)                            |          |
| 2572233048 | t3m_01404 | Metacyc        | PWY-7003: glycerol degradation to butanol                                  |          |
| 2572233048 | t3m_01404 | Metacyc        | PWY-2221: Entner-Doudoroff pathway III (semi-phosphorylative)              |          |
| 2572233048 | t3m_01404 | Metacyc        | GLYCOLYSIS: glycolysis I                                                   |          |
| 2572233048 | t3m_01404 | Metacyc        | P122-PWY: heterolactic fermentation                                        |          |

|            |           |                |                                                   |          |
|------------|-----------|----------------|---------------------------------------------------|----------|
| 2572233048 | t3m_01404 | Metacyc        | P341-PWY: glycolysis V (Pyrococcus)               |          |
| 2572233048 | t3m_01404 | Metacyc        | P124-PWY: Bifidobacterium shunt                   |          |
| 2572233048 | t3m_01404 | Metacyc        | FERMENTATION-PWY: mixed acid fermentation         |          |
| 2572233048 | t3m_01404 | Metacyc        | PWY-6886: 1-butanol autotrophic biosynthesis      |          |
| 2572233048 | t3m_01404 | Metacyc        | PWY-6901: xylose degradation IV                   |          |
| 2572233048 | t3m_01404 | Metacyc        | PWY-1042: glycolysis IV (plant cytosol)           |          |
| 2572233048 | t3m_01404 | Metacyc        | PWY-5484: glycolysis II (from fructose-6P)        |          |
| 2572233048 | t3m_01404 | pfam00224      | PK                                                | 4.50E-09 |
| 2572233048 | t3m_01404 | pfam00224      | PK                                                | 1.80E-37 |
| 2572233048 | t3m_01404 | EC:2.7.1.40    | Pyruvate kinase.                                  |          |
| 2572233048 | t3m_01404 | KO:K00873      | pyruvate kinase [EC:2.7.1.40]                     | 0.00E+00 |
| 2572233048 | t3m_01404 | Locus_type     | CDS                                               |          |
| 2572233048 | t3m_01404 | Product_name   | Pyruvate kinase, barrel domain                    |          |
| 2572233048 | t3m_01404 | Scaffold       | t3m_contig_70_337_len_19247_read_count_1552515.35 |          |
| 2572233048 | t3m_01404 | Coordinates    | 5464..7350(-)                                     |          |
| 2572233048 | t3m_01404 | DNA_length     | 1887bp                                            |          |
| 2572233048 | t3m_01404 | Protein_length | 628aa                                             |          |
| 2572233048 | t3m_01404 | GC             |                                                   | 0.7      |
|            |           |                |                                                   |          |
| 2572233049 | t3m_01405 | Locus_type     | CDS                                               |          |
| 2572233049 | t3m_01405 | Product_name   | hypothetical protein                              |          |
| 2572233049 | t3m_01405 | Scaffold       | t3m_contig_70_337_len_19247_read_count_1552515.35 |          |
| 2572233049 | t3m_01405 | Coordinates    | 7420..7875(-)                                     |          |
| 2572233049 | t3m_01405 | DNA_length     | 456bp                                             |          |
| 2572233049 | t3m_01405 | Protein_length | 151aa                                             |          |
| 2572233049 | t3m_01405 | GC             |                                                   | 0.66     |
|            |           |                |                                                   |          |
| 2572233050 | t3m_01406 | Locus_type     | tRNA                                              |          |
| 2572233050 | t3m_01406 | Product_name   | tRNA_Leu_GAG                                      |          |
| 2572233050 | t3m_01406 | Scaffold       | t3m_contig_70_337_len_19247_read_count_1552515.35 |          |
| 2572233050 | t3m_01406 | Coordinates    | 8069..8153(-)                                     |          |
| 2572233050 | t3m_01406 | DNA_length     | 85bp                                              |          |
| 2572233050 | t3m_01406 | GC             |                                                   | 0.59     |

|            |           |                |                                                   |          |
|------------|-----------|----------------|---------------------------------------------------|----------|
| 2572233051 | t3m_01407 | IMG_pathway    | 433: Archaeal nucleoid proteins                   |          |
| 2572233051 | t3m_01407 | COG_category   | [K] Transcription                                 |          |
| 2572233051 | t3m_01407 | COG1581        | Archaeal DNA-binding protein                      | 3.00E-21 |
| 2572233051 | t3m_01407 | pfam01918      | Alba                                              | 3.90E-15 |
| 2572233051 | t3m_01407 | TIGR00285      | DNA-binding protein Alba                          | 1.80E-33 |
| 2572233051 | t3m_01407 | KO:K03622      | archaea-specific DNA-binding protein              | 3.40E-18 |
| 2572233051 | t3m_01407 | ITERM:00143    | nucleoid protein Alba                             |          |
| 2572233051 | t3m_01407 | Locus_type     | CDS                                               |          |
| 2572233051 | t3m_01407 | Product_name   | nucleoid protein Alba                             |          |
| 2572233051 | t3m_01407 | Scaffold       | t3m_contig_70_337_len_19247_read_count_1552515.35 |          |
| 2572233051 | t3m_01407 | Coordinates    | 8274..8630(+)                                     |          |
| 2572233051 | t3m_01407 | DNA_length     | 357bp                                             |          |
| 2572233051 | t3m_01407 | Protein_length | 118aa                                             |          |
| 2572233051 | t3m_01407 | GC             |                                                   | 0.69     |
| 2572233052 | t3m_01408 | pfam07758      | DUF1614                                           | 1.90E-14 |
| 2572233052 | t3m_01408 | pfam06271      | RDD                                               | 1.90E-14 |
| 2572233052 | t3m_01408 | Locus_type     | CDS                                               |          |
| 2572233052 | t3m_01408 | Product_name   | Protein of unknown function (DUF1614)/RDD family  |          |
| 2572233052 | t3m_01408 | Scaffold       | t3m_contig_70_337_len_19247_read_count_1552515.35 |          |
| 2572233052 | t3m_01408 | Coordinates    | 8551..10437(-)                                    |          |
| 2572233052 | t3m_01408 | DNA_length     | 1887bp                                            |          |
| 2572233052 | t3m_01408 | Protein_length | 628aa                                             |          |
| 2572233052 | t3m_01408 | GC             |                                                   | 0.71     |
| 2572233052 | t3m_01408 | Transmembrane  | Yes                                               |          |
| 2572233053 | t3m_01409 | Metacyc        | GLUTDEG-PWY: glutamate degradation II             |          |
| 2572233053 | t3m_01409 | COG_category   | [E] Amino acid transport and metabolism           |          |
| 2572233053 | t3m_01409 | COG1027        | Aspartate ammonia-lyase                           | 0.00E+00 |
| 2572233053 | t3m_01409 | pfam00206      | Lyase_1                                           | 5.30E-79 |
| 2572233053 | t3m_01409 | pfam10415      | FumaraseC_C                                       | 1.10E-09 |
| 2572233053 | t3m_01409 | EC:4.3.1.1     | Aspartate ammonia-lyase.                          |          |
| 2572233053 | t3m_01409 | KO:K01744      | aspartate ammonia-lyase [EC:4.3.1.1]              | 0.00E+00 |
| 2572233053 | t3m_01409 | Locus_type     | CDS                                               |          |

|            |           |                |                                                                 |          |
|------------|-----------|----------------|-----------------------------------------------------------------|----------|
| 2572233053 | t3m_01409 | Product_name   | Aspartate ammonia-lyase                                         |          |
| 2572233053 | t3m_01409 | Scaffold       | t3m_contig_70_337_len_19247_read_count_1552515.35               |          |
| 2572233053 | t3m_01409 | Coordinates    | 10524..11924(+)                                                 |          |
| 2572233053 | t3m_01409 | DNA_length     | 1401bp                                                          |          |
| 2572233053 | t3m_01409 | Protein_length | 466aa                                                           |          |
| 2572233053 | t3m_01409 | GC             |                                                                 | 0.68     |
| 2572233054 | t3m_01410 | COG_category   | [K] Transcription                                               |          |
| 2572233054 | t3m_01410 | COG1378        | Predicted transcriptional regulators                            | 2.00E-25 |
| 2572233054 | t3m_01410 | pfam01978      | TrmB                                                            | 8.50E-19 |
| 2572233054 | t3m_01410 | Locus_type     | CDS                                                             |          |
| 2572233054 | t3m_01410 | Product_name   | Predicted transcriptional regulators                            |          |
| 2572233054 | t3m_01410 | Scaffold       | t3m_contig_70_337_len_19247_read_count_1552515.35               |          |
| 2572233054 | t3m_01410 | Coordinates    | 11982..12737(+)                                                 |          |
| 2572233054 | t3m_01410 | DNA_length     | 756bp                                                           |          |
| 2572233054 | t3m_01410 | Protein_length | 251aa                                                           |          |
| 2572233054 | t3m_01410 | GC             |                                                                 | 0.7      |
| 2572233055 | t3m_01411 | Metacyc        | PWY-702: methionine biosynthesis II                             |          |
| 2572233055 | t3m_01411 | Metacyc        | PWY-6151: <i>S</i>-adenosyl-L-methionine cycle I                |          |
| 2572233055 | t3m_01411 | Metacyc        | PWY-7076: 3,5-dimethoxytoluene biosynthesis                     |          |
| 2572233055 | t3m_01411 | Metacyc        | PWY-6955: lincomycin biosynthesis                               |          |
| 2572233055 | t3m_01411 | Metacyc        | PWY-5135: xanthohumol biosynthesis                              |          |
| 2572233055 | t3m_01411 | Metacyc        | PWY-7157: eupatolitin 3-<i>O</i>-glucoside biosynthesis         |          |
| 2572233055 | t3m_01411 | Metacyc        | PWY-7079: geodin biosynthesis                                   |          |
| 2572233055 | t3m_01411 | Metacyc        | PWY-7138: noscapine biosynthesis                                |          |
| 2572233055 | t3m_01411 | Metacyc        | PWY-5876: magnoflorine biosynthesis                             |          |
| 2572233055 | t3m_01411 | Metacyc        | PWY-5467: gramine biosynthesis                                  |          |
| 2572233055 | t3m_01411 | Metacyc        | PWYG-321: mycolate biosynthesis                                 |          |
| 2572233055 | t3m_01411 | Metacyc        | PWY-6154: autoinducer AI-2 biosynthesis II (<i>Vibrio</i>)      |          |
| 2572233055 | t3m_01411 | Metacyc        | PWY-1422: vitamin E biosynthesis                                |          |
| 2572233055 | t3m_01411 | Metacyc        | PWY-6978: plastoquinol-9 biosynthesis II                        |          |
| 2572233055 | t3m_01411 | Metacyc        | METHIONINE-DEG1-PWY: methionine degradation I (to homocysteine) |          |
| 2572233055 | t3m_01411 | Metacyc        | PWY-6575: juvenile hormone III biosynthesis I                   |          |

|            |           |         |                                                                                                  |
|------------|-----------|---------|--------------------------------------------------------------------------------------------------|
| 2572233055 | t3m_01411 | Metacyc | PWY-5041: <i>S</i> -adenosyl-L-methionine cycle II                                               |
| 2572233055 | t3m_01411 | Metacyc | PWY-6835: 6-gingerol biosynthesis                                                                |
| 2572233055 | t3m_01411 | Metacyc | PWY-5479: podophyllotoxin and 6-methoxypodophyllotoxin biosynthesis                              |
| 2572233055 | t3m_01411 | Metacyc | PWY-6442: spermidine hydroxycinnamic acid conjugates biosynthesis                                |
| 2572233055 | t3m_01411 | Metacyc | PWY-5290: secologanin and strictosidine biosynthesis                                             |
| 2572233055 | t3m_01411 | Metacyc | PWY-3542: choline biosynthesis II                                                                |
| 2572233055 | t3m_01411 | Metacyc | PWY-6933: seleno-amino acid detoxification and volatilization III                                |
| 2572233055 | t3m_01411 | Metacyc | PWY-7097: vanillin and vanillate degradation I                                                   |
| 2572233055 | t3m_01411 | Metacyc | PWY-6052: dimethylsulfoniopropionate degradation III (demethylation)                             |
| 2572233055 | t3m_01411 | Metacyc | PWY-6045: methylthiopropionate degradation II (demethylation)                                    |
| 2572233055 | t3m_01411 | Metacyc | PWY-6736: sulfur volatiles biosynthesis                                                          |
| 2572233055 | t3m_01411 | Metacyc | PWY-6666: pyocyanin biosynthesis                                                                 |
| 2572233055 | t3m_01411 | Metacyc | PWY-7025: gentamicin biosynthesis                                                                |
| 2572233055 | t3m_01411 | Metacyc | PWY-5882: epoxypseudoisoeugenol-2-methylbutyrate biosynthesis                                    |
| 2572233055 | t3m_01411 | Metacyc | PWY-7151: polymethylated quercetin glucoside biosynthesis II - quercetagenin series (Chrysosplen |
| 2572233055 | t3m_01411 | Metacyc | PWY-6631: <i>O</i> -methylation of tricetin                                                      |
| 2572233055 | t3m_01411 | Metacyc | PWY-7055: daphnetin modification                                                                 |
| 2572233055 | t3m_01411 | Metacyc | PWY-5867: <i>t</i> -anethole biosynthesis                                                        |
| 2572233055 | t3m_01411 | Metacyc | PWY-5748: $\gamma$ -coniciene and coniine biosynthesis                                           |
| 2572233055 | t3m_01411 | Metacyc | PWY-6477: gibberellin inactivation II (methylation)                                              |
| 2572233055 | t3m_01411 | Metacyc | PWY-6682: dehydrophos biosynthesis                                                               |
| 2572233055 | t3m_01411 | Metacyc | PWY-5665: vanilla biosynthesis                                                                   |
| 2572233055 | t3m_01411 | Metacyc | PWY-5391: syringetin biosynthesis                                                                |
| 2572233055 | t3m_01411 | Metacyc | PWY-5305: bixin biosynthesis                                                                     |
| 2572233055 | t3m_01411 | Metacyc | PWY-4942: cyclopropane and cyclopropene fatty acid biosynthesis                                  |
| 2572233055 | t3m_01411 | Metacyc | PWY-1581: plastoquinol-9 biosynthesis I                                                          |
| 2572233055 | t3m_01411 | Metacyc | PWY-7104: dTDP-L-megosamine biosynthesis                                                         |
| 2572233055 | t3m_01411 | Metacyc | PWY-5765: 1,3,5-trimethoxybenzene biosynthesis                                                   |
| 2572233055 | t3m_01411 | Metacyc | PWY-7161: polymethylated quercetin biosynthesis                                                  |
| 2572233055 | t3m_01411 | Metacyc | PWY-6286: spheridene and spheridenone biosynthesis                                               |
| 2572233055 | t3m_01411 | Metacyc | PWY-6153: autoinducer AI-2 biosynthesis I                                                        |
| 2572233055 | t3m_01411 | Metacyc | METH-ACETATE-PWY: methanogenesis from acetate                                                    |
| 2572233055 | t3m_01411 | Metacyc | PWY-1061: homogalacturonan biosynthesis                                                          |
| 2572233055 | t3m_01411 | Metacyc | PWY-6973: dTDP-D-olivose, dTDP-D-oliose and dTDP-D-mycarose biosynthesis                         |

|            |           |              |                                                                                                 |          |
|------------|-----------|--------------|-------------------------------------------------------------------------------------------------|----------|
| 2572233055 | t3m_01411 | Metacyc      | PWY-6976: dTDP-L-mycarose biosynthesis                                                          |          |
| 2572233055 | t3m_01411 | Metacyc      | PWY-6739: pinitol biosynthesis II                                                               |          |
| 2572233055 | t3m_01411 | Metacyc      | PWY-4021: &beta;-alanine betaine biosynthesis                                                   |          |
| 2572233055 | t3m_01411 | Metacyc      | PWY-6650: juvenile hormone III biosynthesis II                                                  |          |
| 2572233055 | t3m_01411 | Metacyc      | PWY-5729: vestitol and sativan biosynthesis                                                     |          |
| 2572233055 | t3m_01411 | Metacyc      | PWY-5987: sorgoleone biosynthesis                                                               |          |
| 2572233055 | t3m_01411 | Metacyc      | PWY-5846: colchicine biosynthesis                                                               |          |
| 2572233055 | t3m_01411 | Metacyc      | PWY-5209: methyl-coenzyme M oxidation to CO <sub>2</sub>                                        |          |
| 2572233055 | t3m_01411 | Metacyc      | PWY-6303: methyl indole-3-acetate interconversion                                               |          |
| 2572233055 | t3m_01411 | Metacyc      | PWY-5975: furaneol biosynthesis                                                                 |          |
| 2572233055 | t3m_01411 | Metacyc      | PWY-7149: superpathway polymethylated quercetin/quercetagenin glucoside biosynthesis (Chryso    |          |
| 2572233055 | t3m_01411 | Metacyc      | PWY-7150: polymethylated quercetin glucoside biosynthesis I - quercetin series (Chrysosplenium) |          |
| 2572233055 | t3m_01411 | Metacyc      | PWY-6427: rot-2'-enonate biosynthesis                                                           |          |
| 2572233055 | t3m_01411 | Metacyc      | PWY-7058: esculetin modification                                                                |          |
| 2572233055 | t3m_01411 | Metacyc      | PWY-5287: sanguinarine and macarpine biosynthesis                                               |          |
| 2572233055 | t3m_01411 | Metacyc      | PWY-6581: spirilloxanthin and 2,2'-diketo-spirilloxanthin biosynthesis                          |          |
| 2572233055 | t3m_01411 | Metacyc      | PWY-5507: adenosylcobalamin biosynthesis I (early cobalt insertion)                             |          |
| 2572233055 | t3m_01411 | Metacyc      | PWY-7045: mithramycin biosynthesis                                                              |          |
| 2572233055 | t3m_01411 | Metacyc      | PWY-7163: polymethylated kaempferol biosynthesis                                                |          |
| 2572233055 | t3m_01411 | Metacyc      | PWY-7160: polymethylated myricetin biosynthesis (tomato)                                        |          |
| 2572233055 | t3m_01411 | Metacyc      | PWY-7186: superpathway of scopolin and esculin biosynthesis                                     |          |
| 2572233055 | t3m_01411 | Metacyc      | PWY-7135: emetine biosynthesis                                                                  |          |
| 2572233055 | t3m_01411 | Metacyc      | PWY-5773: gossypol biosynthesis                                                                 |          |
| 2572233055 | t3m_01411 | Metacyc      | PWY-6424: sitosterol biosynthesis                                                               |          |
| 2572233055 | t3m_01411 | Metacyc      | PWY-6339: syringate degradation                                                                 |          |
| 2572233055 | t3m_01411 | COG_category | [R] General function prediction only                                                            |          |
| 2572233055 | t3m_01411 | COG2520      | Predicted methyltransferase                                                                     | 3.00E-54 |
| 2572233055 | t3m_01411 | pfam02475    | Met_10                                                                                          | 2.20E-46 |
| 2572233055 | t3m_01411 | EC:2.1.1.-   | Transferases. Transferring one-carbon groups. Methyltransferases.                               |          |
| 2572233055 | t3m_01411 | KO:K07055    | tRNA wybutosine-synthesizing protein 2 [EC:2.1.1.-]                                             | 2.70E-40 |
| 2572233055 | t3m_01411 | Locus_type   | CDS                                                                                             |          |
| 2572233055 | t3m_01411 | Product_name | Predicted methyltransferase                                                                     |          |
| 2572233055 | t3m_01411 | Scaffold     | t3m_contig_70_337_len_19247_read_count_1552515.35                                               |          |
| 2572233055 | t3m_01411 | Coordinates  | 12734..13615(+)                                                                                 |          |

|            |           |                |                                                                        |          |
|------------|-----------|----------------|------------------------------------------------------------------------|----------|
| 2572233055 | t3m_01411 | DNA_length     | 882bp                                                                  |          |
| 2572233055 | t3m_01411 | Protein_length | 293aa                                                                  |          |
| 2572233055 | t3m_01411 | GC             |                                                                        | 0.72     |
| 2572233056 | t3m_01412 | COG_category   | [E] Amino acid transport and metabolism                                |          |
| 2572233056 | t3m_01412 | COG0436        | Aspartate/tyrosine/aromatic aminotransferase                           | 7.00E-48 |
| 2572233056 | t3m_01412 | pfam00155      | Aminotran_1_2                                                          | 1.70E-36 |
| 2572233056 | t3m_01412 | Locus_type     | CDS                                                                    |          |
| 2572233056 | t3m_01412 | Product_name   | Aspartate/tyrosine/aromatic aminotransferase                           |          |
| 2572233056 | t3m_01412 | Scaffold       | t3m_contig_70_337_len_19247_read_count_1552515.35                      |          |
| 2572233056 | t3m_01412 | Coordinates    | 13612..14739(-)                                                        |          |
| 2572233056 | t3m_01412 | DNA_length     | 1128bp                                                                 |          |
| 2572233056 | t3m_01412 | Protein_length | 375aa                                                                  |          |
| 2572233056 | t3m_01412 | GC             |                                                                        | 0.69     |
| 2572233057 | t3m_01413 | KEGG_module    | M00117: Ubiquinone biosynthesis, prokaryotes, chorismate => ubiquinone |          |
| 2572233057 | t3m_01413 | KEGG_module    | M00116: Menaquinone biosynthesis, chorismate => menaquinone            |          |
| 2572233057 | t3m_01413 | Metacyc        | PWY-5872: ubiquinol-10 biosynthesis (eukaryotic)                       |          |
| 2572233057 | t3m_01413 | Metacyc        | PWY-5856: ubiquinol-9 biosynthesis (prokaryotic)                       |          |
| 2572233057 | t3m_01413 | Metacyc        | PWY-5844: menaquinol-9 biosynthesis                                    |          |
| 2572233057 | t3m_01413 | Metacyc        | PWY-5873: ubiquinol-7 biosynthesis (eukaryotic)                        |          |
| 2572233057 | t3m_01413 | Metacyc        | PWY-5871: ubiquinol-9 biosynthesis (eukaryotic)                        |          |
| 2572233057 | t3m_01413 | Metacyc        | MENAQUINONESYN-PWY: menaquinol-8 biosynthesis                          |          |
| 2572233057 | t3m_01413 | Metacyc        | PWY-5857: ubiquinol-10 biosynthesis (prokaryotic)                      |          |
| 2572233057 | t3m_01413 | Metacyc        | PWY-5855: ubiquinol-7 biosynthesis (prokaryotic)                       |          |
| 2572233057 | t3m_01413 | Metacyc        | PWY-5839: menaquinol-7 biosynthesis                                    |          |
| 2572233057 | t3m_01413 | Metacyc        | PWY-6708: ubiquinol-8 biosynthesis (prokaryotic)                       |          |
| 2572233057 | t3m_01413 | Metacyc        | PWY-5870: ubiquinol-8 biosynthesis (eukaryotic)                        |          |
| 2572233057 | t3m_01413 | Metacyc        | PWY-5892: menaquinol-12 biosynthesis                                   |          |
| 2572233057 | t3m_01413 | Metacyc        | PWY-5849: menaquinol-6 biosynthesis                                    |          |
| 2572233057 | t3m_01413 | Metacyc        | PWY-5891: menaquinol-11 biosynthesis                                   |          |
| 2572233057 | t3m_01413 | Metacyc        | PWY30-19: ubiquinol-6 biosynthesis (eukaryotic)                        |          |
| 2572233057 | t3m_01413 | Metacyc        | PWY-5890: menaquinol-10 biosynthesis                                   |          |
| 2572233057 | t3m_01413 | Metacyc        | PWY-5895: menaquinol-13 biosynthesis                                   |          |



|            |           |                |                                                                      |          |
|------------|-----------|----------------|----------------------------------------------------------------------|----------|
| 2572233057 | t3m_01413 | COG_category   | [H] Coenzyme transport and metabolism                                |          |
| 2572233057 | t3m_01413 | COG2226        | Methylase involved in ubiquinone/menaquinone biosynthesis            | 9.00E-45 |
| 2572233057 | t3m_01413 | pfam01209      | Ubie_methyltran                                                      | 1.20E-39 |
| 2572233057 | t3m_01413 | EC:2.1.1.163   | Demethylmenaquinone methyltransferase.                               |          |
| 2572233057 | t3m_01413 | EC:2.1.1.201   | 2-methoxy-6-polyprenyl-1,4-benzoquinol methylase.                    |          |
| 2572233057 | t3m_01413 | TIGR01934      | ubiquinone/menaquinone biosynthesis methyltransferases               | 1.70E-53 |
| 2572233057 | t3m_01413 | KO:K03183      | ubiquinone/menaquinone biosynthesis methyltransferase [EC:2.1.1.163] | 4.10E-37 |
| 2572233057 | t3m_01413 | Locus_type     | CDS                                                                  |          |
| 2572233057 | t3m_01413 | Product_name   | ubiquinone/menaquinone biosynthesis methyltransferases               |          |
| 2572233057 | t3m_01413 | Scaffold       | t3m_contig_70_337_len_19247_read_count_1552515.35                    |          |
| 2572233057 | t3m_01413 | Coordinates    | 14764..15594(-)                                                      |          |
| 2572233057 | t3m_01413 | DNA_length     | 831bp                                                                |          |
| 2572233057 | t3m_01413 | Protein_length | 276aa                                                                |          |
| 2572233057 | t3m_01413 | GC             |                                                                      | 0.71     |
| 2572233058 | t3m_01414 | pfam13424      | TPR_12                                                               | 2.30E-09 |
| 2572233058 | t3m_01414 | pfam13191      | AAA_16                                                               | 9.10E-18 |
| 2572233058 | t3m_01414 | Locus_type     | CDS                                                                  |          |
| 2572233058 | t3m_01414 | Product_name   | Tetratricopeptide repeat/AAA ATPase domain                           |          |
| 2572233058 | t3m_01414 | Scaffold       | t3m_contig_70_337_len_19247_read_count_1552515.35                    |          |
| 2572233058 | t3m_01414 | Coordinates    | 15606..18005(-)                                                      |          |
| 2572233058 | t3m_01414 | DNA_length     | 2400bp                                                               |          |
| 2572233058 | t3m_01414 | Protein_length | 799aa                                                                |          |
| 2572233058 | t3m_01414 | GC             |                                                                      | 0.69     |
| 2572233059 | t3m_01415 | Locus_type     | CDS                                                                  |          |
| 2572233059 | t3m_01415 | Product_name   | hypothetical protein                                                 |          |
| 2572233059 | t3m_01415 | Scaffold       | t3m_contig_70_337_len_19247_read_count_1552515.35                    |          |
| 2572233059 | t3m_01415 | Coordinates    | 18029..19246(-)                                                      |          |
| 2572233059 | t3m_01415 | DNA_length     | 1218bp                                                               |          |
| 2572233059 | t3m_01415 | Protein_length | 405aa                                                                |          |
| 2572233059 | t3m_01415 | GC             |                                                                      | 0.68     |
| 2572233060 | t3m_01416 | COG_category   | [E] Amino acid transport and metabolism                              |          |

|            |           |                |                                                                        |           |
|------------|-----------|----------------|------------------------------------------------------------------------|-----------|
| 2572233060 | t3m_01416 | COG0747        | ABC-type dipeptide transport system, periplasmic component             | 4.00E-25  |
| 2572233060 | t3m_01416 | pfam00496      | SBP_bac_5                                                              | 4.20E-31  |
| 2572233060 | t3m_01416 | Locus_type     | CDS                                                                    |           |
| 2572233060 | t3m_01416 | Product_name   | Bacterial extracellular solute-binding proteins, family 5 Middle       |           |
| 2572233060 | t3m_01416 | Scaffold       | t3m_contig_70_355_len_18762_read_count_1744420.36                      |           |
| 2572233060 | t3m_01416 | Coordinates    | 3..1364(+)                                                             |           |
| 2572233060 | t3m_01416 | DNA_length     | 1362bp                                                                 |           |
| 2572233060 | t3m_01416 | Protein_length | 453aa                                                                  |           |
| 2572233060 | t3m_01416 | GC             |                                                                        | 0.63      |
| 2572233061 | t3m_01417 | pfam00005      | ABC_tran                                                               | 7.30E-11  |
| 2572233061 | t3m_01417 | pfam08352      | oligo_HPY                                                              | 2.10E-18  |
| 2572233061 | t3m_01417 | pfam00005      | ABC_tran                                                               | 7.00E-17  |
| 2572233061 | t3m_01417 | TIGR01727      | oligopeptide/dipeptide ABC transporter, ATP-binding protein, C-termina | 7.40E-28  |
| 2572233061 | t3m_01417 | Locus_type     | CDS                                                                    |           |
| 2572233061 | t3m_01417 | Product_name   | oligopeptide/dipeptide ABC transporter, ATP-binding protein, C-termina |           |
| 2572233061 | t3m_01417 | Scaffold       | t3m_contig_70_355_len_18762_read_count_1744420.36                      |           |
| 2572233061 | t3m_01417 | Coordinates    | 1367..2959(-)                                                          |           |
| 2572233061 | t3m_01417 | DNA_length     | 1593bp                                                                 |           |
| 2572233061 | t3m_01417 | Protein_length | 530aa                                                                  |           |
| 2572233061 | t3m_01417 | GC             |                                                                        | 0.71      |
| 2572233062 | t3m_01418 | COG_category   | [P] Inorganic ion transport and metabolism                             |           |
| 2572233062 | t3m_01418 | COG_category   | [E] Amino acid transport and metabolism                                |           |
| 2572233062 | t3m_01418 | COG0444        | ABC-type dipeptide/oligopeptide/nickel transport system, ATPase comp   | 2.00E-109 |
| 2572233062 | t3m_01418 | pfam00005      | ABC_tran                                                               | 2.50E-26  |
| 2572233062 | t3m_01418 | pfam08352      | oligo_HPY                                                              | 3.10E-21  |
| 2572233062 | t3m_01418 | TIGR01727      | oligopeptide/dipeptide ABC transporter, ATP-binding protein, C-termina | 1.10E-29  |
| 2572233062 | t3m_01418 | Locus_type     | CDS                                                                    |           |
| 2572233062 | t3m_01418 | Product_name   | oligopeptide/dipeptide ABC transporter, ATP-binding protein, C-termina |           |
| 2572233062 | t3m_01418 | Scaffold       | t3m_contig_70_355_len_18762_read_count_1744420.36                      |           |
| 2572233062 | t3m_01418 | Coordinates    | 2956..4104(-)                                                          |           |
| 2572233062 | t3m_01418 | DNA_length     | 1149bp                                                                 |           |
| 2572233062 | t3m_01418 | Protein_length | 382aa                                                                  |           |

|            |           |                |                                                                       |          |
|------------|-----------|----------------|-----------------------------------------------------------------------|----------|
| 2572233062 | t3m_01418 | GC             |                                                                       | 0.69     |
| 2572233063 | t3m_01419 | KEGG_module    | M00239: Peptides/nickel transport system                              |          |
| 2572233063 | t3m_01419 | COG_category   | [E] Amino acid transport and metabolism                               |          |
| 2572233063 | t3m_01419 | COG_category   | [P] Inorganic ion transport and metabolism                            |          |
| 2572233063 | t3m_01419 | COG1173        | ABC-type dipeptide/oligopeptide/nickel transport systems, permease co | 5.00E-61 |
| 2572233063 | t3m_01419 | pfam00528      | BPD_transp_1                                                          | 1.50E-25 |
| 2572233063 | t3m_01419 | KO:K02034      | peptide/nickel transport system permease protein                      | 0.00E+00 |
| 2572233063 | t3m_01419 | Locus_type     | CDS                                                                   |          |
| 2572233063 | t3m_01419 | Product_name   | ABC-type dipeptide/oligopeptide/nickel transport systems, permease co |          |
| 2572233063 | t3m_01419 | Scaffold       | t3m_contig_70_355_len_18762_read_count_1744420.36                     |          |
| 2572233063 | t3m_01419 | Coordinates    | 4101..5174(-)                                                         |          |
| 2572233063 | t3m_01419 | DNA_length     | 1074bp                                                                |          |
| 2572233063 | t3m_01419 | Protein_length | 357aa                                                                 |          |
| 2572233063 | t3m_01419 | GC             |                                                                       | 0.67     |
| 2572233063 | t3m_01419 | Transmembrane  | Yes                                                                   |          |
| 2572233064 | t3m_01420 | KEGG_module    | M00239: Peptides/nickel transport system                              |          |
| 2572233064 | t3m_01420 | COG_category   | [P] Inorganic ion transport and metabolism                            |          |
| 2572233064 | t3m_01420 | COG_category   | [E] Amino acid transport and metabolism                               |          |
| 2572233064 | t3m_01420 | COG0601        | ABC-type dipeptide/oligopeptide/nickel transport systems, permease co | 4.00E-63 |
| 2572233064 | t3m_01420 | pfam00528      | BPD_transp_1                                                          | 1.50E-35 |
| 2572233064 | t3m_01420 | KO:K02033      | peptide/nickel transport system permease protein                      | 0.00E+00 |
| 2572233064 | t3m_01420 | Locus_type     | CDS                                                                   |          |
| 2572233064 | t3m_01420 | Product_name   | ABC-type dipeptide/oligopeptide/nickel transport systems, permease co |          |
| 2572233064 | t3m_01420 | Scaffold       | t3m_contig_70_355_len_18762_read_count_1744420.36                     |          |
| 2572233064 | t3m_01420 | Coordinates    | 5181..6200(-)                                                         |          |
| 2572233064 | t3m_01420 | DNA_length     | 1020bp                                                                |          |
| 2572233064 | t3m_01420 | Protein_length | 339aa                                                                 |          |
| 2572233064 | t3m_01420 | GC             |                                                                       | 0.65     |
| 2572233064 | t3m_01420 | Transmembrane  | Yes                                                                   |          |
| 2572233065 | t3m_01421 | KEGG_module    | M00121: Heme biosynthesis, glutamate => protoheme/siroheme            |          |
| 2572233065 | t3m_01421 | Metacyc        | PWY-5188: tetrapyrrole biosynthesis I (from glutamate)                |          |

|            |           |                |                                                       |           |
|------------|-----------|----------------|-------------------------------------------------------|-----------|
| 2572233065 | t3m_01421 | COG_category   | [H] Coenzyme transport and metabolism                 |           |
| 2572233065 | t3m_01421 | COG0001        | Glutamate-1-semialdehyde aminotransferase             | 6.00E-130 |
| 2572233065 | t3m_01421 | pfam00202      | Aminotran_3                                           | 1.30E-59  |
| 2572233065 | t3m_01421 | EC:5.4.3.8     | Glutamate-1-semialdehyde 2,1-aminomutase.             |           |
| 2572233065 | t3m_01421 | TIGR00713      | glutamate-1-semialdehyde-2,1-aminomutase              | 9.50E-128 |
| 2572233065 | t3m_01421 | KO:K01845      | glutamate-1-semialdehyde 2,1-aminomutase [EC:5.4.3.8] | 0.00E+00  |
| 2572233065 | t3m_01421 | Locus_type     | CDS                                                   |           |
| 2572233065 | t3m_01421 | Product_name   | Glutamate-1-semialdehyde aminotransferase             |           |
| 2572233065 | t3m_01421 | Scaffold       | t3m_contig_70_355_len_18762_read_count_1744420.36     |           |
| 2572233065 | t3m_01421 | Coordinates    | 6338..8002(-)                                         |           |
| 2572233065 | t3m_01421 | DNA_length     | 1665bp                                                |           |
| 2572233065 | t3m_01421 | Protein_length | 554aa                                                 |           |
| 2572233065 | t3m_01421 | GC             |                                                       | 0.65      |
| 2572233066 | t3m_01422 | COG_category   | [E] Amino acid transport and metabolism               |           |
| 2572233066 | t3m_01422 | COG1748        | Saccharopine dehydrogenase and related proteins       | 2.00E-46  |
| 2572233066 | t3m_01422 | pfam03435      | Saccharop_dh                                          | 2.00E-39  |
| 2572233066 | t3m_01422 | Locus_type     | CDS                                                   |           |
| 2572233066 | t3m_01422 | Product_name   | Saccharopine dehydrogenase and related proteins       |           |
| 2572233066 | t3m_01422 | Scaffold       | t3m_contig_70_355_len_18762_read_count_1744420.36     |           |
| 2572233066 | t3m_01422 | Coordinates    | 8199..9341(-)                                         |           |
| 2572233066 | t3m_01422 | DNA_length     | 1143bp                                                |           |
| 2572233066 | t3m_01422 | Protein_length | 380aa                                                 |           |
| 2572233066 | t3m_01422 | GC             |                                                       | 0.68      |
| 2572233067 | t3m_01423 | Locus_type     | CDS                                                   |           |
| 2572233067 | t3m_01423 | Product_name   | hypothetical protein                                  |           |
| 2572233067 | t3m_01423 | Scaffold       | t3m_contig_70_355_len_18762_read_count_1744420.36     |           |
| 2572233067 | t3m_01423 | Coordinates    | 9450..10094(-)                                        |           |
| 2572233067 | t3m_01423 | DNA_length     | 645bp                                                 |           |
| 2572233067 | t3m_01423 | Protein_length | 214aa                                                 |           |
| 2572233067 | t3m_01423 | GC             |                                                       | 0.69      |
| 2572233068 | t3m_01424 | COG_category   | [R] General function prediction only                  |           |

|            |           |                |                                                              |           |
|------------|-----------|----------------|--------------------------------------------------------------|-----------|
| 2572233068 | t3m_01424 | COG1574        | Predicted metal-dependent hydrolase with the TIM-barrel fold | 2.00E-87  |
| 2572233068 | t3m_01424 | pfam07969      | Amidohydro_3                                                 | 1.10E-60  |
| 2572233068 | t3m_01424 | Locus_type     | CDS                                                          |           |
| 2572233068 | t3m_01424 | Product_name   | Predicted metal-dependent hydrolase with the TIM-barrel fold |           |
| 2572233068 | t3m_01424 | Scaffold       | t3m_contig_70_355_len_18762_read_count_1744420.36            |           |
| 2572233068 | t3m_01424 | Coordinates    | 10118..11695(-)                                              |           |
| 2572233068 | t3m_01424 | DNA_length     | 1578bp                                                       |           |
| 2572233068 | t3m_01424 | Protein_length | 525aa                                                        |           |
| 2572233068 | t3m_01424 | GC             |                                                              | 0.72      |
| 2572233069 | t3m_01425 | Metacyc        | PWY-381: nitrate reduction II (assimilatory)                 |           |
| 2572233069 | t3m_01425 | Metacyc        | PWY-6549: glutamine biosynthesis III                         |           |
| 2572233069 | t3m_01425 | Metacyc        | GLNSYN-PWY: glutamine biosynthesis I                         |           |
| 2572233069 | t3m_01425 | Metacyc        | PWY-5675: nitrate reduction V (assimilatory)                 |           |
| 2572233069 | t3m_01425 | Metacyc        | PWY490-3: nitrate reduction VI (assimilatory)                |           |
| 2572233069 | t3m_01425 | Metacyc        | PWY-6964: ammonia assimilation cycle II                      |           |
| 2572233069 | t3m_01425 | Metacyc        | PWY-6963: ammonia assimilation cycle I                       |           |
| 2572233069 | t3m_01425 | COG_category   | [E] Amino acid transport and metabolism                      |           |
| 2572233069 | t3m_01425 | COG0174        | Glutamine synthetase                                         | 1.00E-117 |
| 2572233069 | t3m_01425 | pfam00120      | Gln-synt_C                                                   | 3.00E-80  |
| 2572233069 | t3m_01425 | pfam03951      | Gln-synt_N                                                   | 2.80E-21  |
| 2572233069 | t3m_01425 | EC:6.3.1.2     | Glutamate--ammonia ligase.                                   |           |
| 2572233069 | t3m_01425 | TIGR00653      | glutamine synthetase, type I                                 | 0.00E+00  |
| 2572233069 | t3m_01425 | KO:K01915      | glutamine synthetase [EC:6.3.1.2]                            | 0.00E+00  |
| 2572233069 | t3m_01425 | Locus_type     | CDS                                                          |           |
| 2572233069 | t3m_01425 | Product_name   | L-glutamine synthetase (EC 6.3.1.2)                          |           |
| 2572233069 | t3m_01425 | Scaffold       | t3m_contig_70_355_len_18762_read_count_1744420.36            |           |
| 2572233069 | t3m_01425 | Coordinates    | 11766..13193(-)                                              |           |
| 2572233069 | t3m_01425 | DNA_length     | 1428bp                                                       |           |
| 2572233069 | t3m_01425 | Protein_length | 475aa                                                        |           |
| 2572233069 | t3m_01425 | GC             |                                                              | 0.66      |
| 2572233070 | t3m_01426 | COG_category   | [K] Transcription                                            |           |
| 2572233070 | t3m_01426 | COG1522        | Transcriptional regulators                                   | 9.00E-22  |

|            |           |                |                                                                            |          |
|------------|-----------|----------------|----------------------------------------------------------------------------|----------|
| 2572233070 | t3m_01426 | pfam01037      | AsnC_trans_reg                                                             | 1.10E-10 |
| 2572233070 | t3m_01426 | pfam13404      | HTH_AsnC-type                                                              | 9.50E-15 |
| 2572233070 | t3m_01426 | Locus_type     | CDS                                                                        |          |
| 2572233070 | t3m_01426 | Product_name   | Transcriptional regulators                                                 |          |
| 2572233070 | t3m_01426 | Scaffold       | t3m_contig_70_355_len_18762_read_count_1744420.36                          |          |
| 2572233070 | t3m_01426 | Coordinates    | 13348..13839(+)                                                            |          |
| 2572233070 | t3m_01426 | DNA_length     | 492bp                                                                      |          |
| 2572233070 | t3m_01426 | Protein_length | 163aa                                                                      |          |
| 2572233070 | t3m_01426 | GC             |                                                                            | 0.67     |
| 2572233071 | t3m_01427 | Metacyc        | 3-HYDROXYPHENYLACETATE-DEGRADATION-PWY: 4-hydroxyphenylacetate degradation |          |
| 2572233071 | t3m_01427 | Metacyc        | PWY-7046: 4-coumarate degradation (anaerobic)                              |          |
| 2572233071 | t3m_01427 | Metacyc        | PWY-7085: triethylamine degradation                                        |          |
| 2572233071 | t3m_01427 | Metacyc        | NPGLUCAT-PWY: Entner-Doudoroff pathway II (non-phosphorylative)            |          |
| 2572233071 | t3m_01427 | Metacyc        | CALVIN-PWY: Calvin-Benson-Bassham cycle                                    |          |
| 2572233071 | t3m_01427 | Metacyc        | PWY-7153: grixazone biosynthesis                                           |          |
| 2572233071 | t3m_01427 | Metacyc        | PWY0-1517: sedoheptulose bisphosphate bypass                               |          |
| 2572233071 | t3m_01427 | Metacyc        | PWY-6713: L-rhamnose degradation II                                        |          |
| 2572233071 | t3m_01427 | COG_category   | [G] Carbohydrate transport and metabolism                                  |          |
| 2572233071 | t3m_01427 | COG1830        | DhnA-type fructose-1,6-bisphosphate aldolase and related enzymes           | 1.00E-56 |
| 2572233071 | t3m_01427 | pfam01791      | DeoC                                                                       | 1.80E-18 |
| 2572233071 | t3m_01427 | EC:4.1.2.-     | Lyases. Carbon-carbon lyases. Aldehyde-lyases.                             |          |
| 2572233071 | t3m_01427 | KO:K08321      | putative autoinducer-2 (AI-2) aldolase [EC:4.1.2.-]                        | 0.00E+00 |
| 2572233071 | t3m_01427 | Locus_type     | CDS                                                                        |          |
| 2572233071 | t3m_01427 | Product_name   | DhnA-type fructose-1,6-bisphosphate aldolase and related enzymes           |          |
| 2572233071 | t3m_01427 | Scaffold       | t3m_contig_70_355_len_18762_read_count_1744420.36                          |          |
| 2572233071 | t3m_01427 | Coordinates    | 13930..14742(+)                                                            |          |
| 2572233071 | t3m_01427 | DNA_length     | 813bp                                                                      |          |
| 2572233071 | t3m_01427 | Protein_length | 270aa                                                                      |          |
| 2572233071 | t3m_01427 | GC             |                                                                            | 0.69     |
| 2572233072 | t3m_01428 | Locus_type     | tRNA                                                                       |          |
| 2572233072 | t3m_01428 | Product_name   | tRNA_Leu_CAG                                                               |          |
| 2572233072 | t3m_01428 | Scaffold       | t3m_contig_70_355_len_18762_read_count_1744420.36                          |          |

|            |           |                |                                                         |          |
|------------|-----------|----------------|---------------------------------------------------------|----------|
| 2572233072 | t3m_01428 | Coordinates    | 14804..14888(+)                                         |          |
| 2572233072 | t3m_01428 | DNA_length     | 85bp                                                    |          |
| 2572233072 | t3m_01428 | GC             |                                                         | 0.62     |
|            |           |                |                                                         |          |
| 2572233073 | t3m_01429 | Locus_type     | CDS                                                     |          |
| 2572233073 | t3m_01429 | Product_name   | hypothetical protein                                    |          |
| 2572233073 | t3m_01429 | Scaffold       | t3m_contig_70_355_len_18762_read_count_1744420.36       |          |
| 2572233073 | t3m_01429 | Coordinates    | 15013..15309(+)                                         |          |
| 2572233073 | t3m_01429 | DNA_length     | 297bp                                                   |          |
| 2572233073 | t3m_01429 | Protein_length | 98aa                                                    |          |
| 2572233073 | t3m_01429 | GC             |                                                         | 0.71     |
|            |           |                |                                                         |          |
| 2572233074 | t3m_01430 | COG_category   | [C] Energy production and conversion                    |          |
| 2572233074 | t3m_01430 | COG1454        | Alcohol dehydrogenase, class IV                         | 1.00E-63 |
| 2572233074 | t3m_01430 | pfam00465      | Fe-ADH                                                  | 1.20E-68 |
| 2572233074 | t3m_01430 | Locus_type     | CDS                                                     |          |
| 2572233074 | t3m_01430 | Product_name   | Alcohol dehydrogenase, class IV                         |          |
| 2572233074 | t3m_01430 | Scaffold       | t3m_contig_70_355_len_18762_read_count_1744420.36       |          |
| 2572233074 | t3m_01430 | Coordinates    | 15338..16492(+)                                         |          |
| 2572233074 | t3m_01430 | DNA_length     | 1155bp                                                  |          |
| 2572233074 | t3m_01430 | Protein_length | 384aa                                                   |          |
| 2572233074 | t3m_01430 | GC             |                                                         | 0.72     |
|            |           |                |                                                         |          |
| 2572233075 | t3m_01431 | COG_category   | [P] Inorganic ion transport and metabolism              |          |
| 2572233075 | t3m_01431 | COG1392        | Phosphate transport regulator (distant homolog of PhoU) | 3.00E-28 |
| 2572233075 | t3m_01431 | pfam00083      | Sugar_tr                                                | 1.10E-51 |
| 2572233075 | t3m_01431 | pfam01865      | PhoU_div                                                | 1.20E-20 |
| 2572233075 | t3m_01431 | TIGR00153      | TIGR00153 family protein                                | 3.30E-16 |
| 2572233075 | t3m_01431 | Locus_type     | CDS                                                     |          |
| 2572233075 | t3m_01431 | Product_name   | Phosphate transport regulator (distant homolog of PhoU) |          |
| 2572233075 | t3m_01431 | Scaffold       | t3m_contig_70_355_len_18762_read_count_1744420.36       |          |
| 2572233075 | t3m_01431 | Coordinates    | 16569..18647(+)                                         |          |
| 2572233075 | t3m_01431 | DNA_length     | 2079bp                                                  |          |
| 2572233075 | t3m_01431 | Protein_length | 692aa                                                   |          |

|            |           |                |              |                                                   |          |
|------------|-----------|----------------|--------------|---------------------------------------------------|----------|
| 2572233075 | t3m_01431 | GC             |              |                                                   | 0.67     |
| 2572233075 | t3m_01431 | Transmembrane  |              | Yes                                               |          |
| 2572233075 | t3m_01431 | Fused_gene     |              | Yes                                               |          |
| 2572233076 | t3m_01432 | Locus_type     |              | CDS                                               |          |
| 2572233076 | t3m_01432 | Product_name   |              | hypothetical protein                              |          |
| 2572233076 | t3m_01432 | Scaffold       |              | t3m_contig_70_355_len_18762_read_count_1744420.36 |          |
| 2572233076 | t3m_01432 | Coordinates    |              | 18629..18760(-)                                   |          |
| 2572233076 | t3m_01432 | DNA_length     |              | 132bp                                             |          |
| 2572233076 | t3m_01432 | Protein_length |              | 43aa                                              |          |
| 2572233076 | t3m_01432 | GC             |              |                                                   | 0.77     |
| 2572233077 | t3m_01433 | Locus_type     |              | tRNA                                              |          |
| 2572233077 | t3m_01433 | Product_name   |              | tRNA_Cys_GCA                                      |          |
| 2572233077 | t3m_01433 | Scaffold       |              | t3m_contig_70_375_len_18148_read_count_1598522.37 |          |
| 2572233077 | t3m_01433 | Coordinates    |              | 3..75(+)                                          |          |
| 2572233077 | t3m_01433 | DNA_length     |              | 73bp                                              |          |
| 2572233077 | t3m_01433 | GC             |              |                                                   | 0.58     |
| 2572233078 | t3m_01434 | pfam01828      | Peptidase_A4 |                                                   | 1.70E-14 |
| 2572233078 | t3m_01434 | Locus_type     |              | CDS                                               |          |
| 2572233078 | t3m_01434 | Product_name   |              | Peptidase A4 family                               |          |
| 2572233078 | t3m_01434 | Scaffold       |              | t3m_contig_70_375_len_18148_read_count_1598522.37 |          |
| 2572233078 | t3m_01434 | Coordinates    |              | 188..1144(-)                                      |          |
| 2572233078 | t3m_01434 | DNA_length     |              | 957bp                                             |          |
| 2572233078 | t3m_01434 | Protein_length |              | 318aa                                             |          |
| 2572233078 | t3m_01434 | GC             |              |                                                   | 0.63     |
| 2572233078 | t3m_01434 | Transmembrane  |              | Yes                                               |          |
| 2572233079 | t3m_01435 | pfam13418      | Kelch_4      |                                                   | 1.40E-05 |
| 2572233079 | t3m_01435 | Locus_type     |              | CDS                                               |          |
| 2572233079 | t3m_01435 | Product_name   |              | Galactose oxidase, central domain                 |          |
| 2572233079 | t3m_01435 | Scaffold       |              | t3m_contig_70_375_len_18148_read_count_1598522.37 |          |
| 2572233079 | t3m_01435 | Coordinates    |              | 1473..2432(-)                                     |          |



|            |           |                |                                                                 |          |
|------------|-----------|----------------|-----------------------------------------------------------------|----------|
| 2572233079 | t3m_01435 | DNA_length     | 960bp                                                           |          |
| 2572233079 | t3m_01435 | Protein_length | 319aa                                                           |          |
| 2572233079 | t3m_01435 | GC             |                                                                 | 0.68     |
| 2572233079 | t3m_01435 | Transmembrane  | Yes                                                             |          |
| 2572233080 | t3m_01436 | COG_category   | [R] General function prediction only                            |          |
| 2572233080 | t3m_01436 | COG0312        | Predicted Zn-dependent proteases and their inactivated homologs | 7.00E-43 |
| 2572233080 | t3m_01436 | pfam01523      | PmbA_TldD                                                       | 3.00E-32 |
| 2572233080 | t3m_01436 | Locus_type     | CDS                                                             |          |
| 2572233080 | t3m_01436 | Product_name   | Predicted Zn-dependent proteases and their inactivated homologs |          |
| 2572233080 | t3m_01436 | Scaffold       | t3m_contig_70_375_len_18148_read_count_1598522.37               |          |
| 2572233080 | t3m_01436 | Coordinates    | 2609..4039(-)                                                   |          |
| 2572233080 | t3m_01436 | DNA_length     | 1431bp                                                          |          |
| 2572233080 | t3m_01436 | Protein_length | 476aa                                                           |          |
| 2572233080 | t3m_01436 | GC             |                                                                 | 0.7      |
| 2572233081 | t3m_01437 | COG_category   | [R] General function prediction only                            |          |
| 2572233081 | t3m_01437 | COG0312        | Predicted Zn-dependent proteases and their inactivated homologs | 5.00E-70 |
| 2572233081 | t3m_01437 | pfam01523      | PmbA_TldD                                                       | 7.10E-49 |
| 2572233081 | t3m_01437 | KO:K03568      | TldD protein                                                    | 0.00E+00 |
| 2572233081 | t3m_01437 | Locus_type     | CDS                                                             |          |
| 2572233081 | t3m_01437 | Product_name   | Predicted Zn-dependent proteases and their inactivated homologs |          |
| 2572233081 | t3m_01437 | Scaffold       | t3m_contig_70_375_len_18148_read_count_1598522.37               |          |
| 2572233081 | t3m_01437 | Coordinates    | 4036..5664(-)                                                   |          |
| 2572233081 | t3m_01437 | DNA_length     | 1629bp                                                          |          |
| 2572233081 | t3m_01437 | Protein_length | 542aa                                                           |          |
| 2572233081 | t3m_01437 | GC             |                                                                 | 0.67     |
| 2572233082 | t3m_01438 | pfam08445      | FR47                                                            | 6.50E-15 |
| 2572233082 | t3m_01438 | Locus_type     | CDS                                                             |          |
| 2572233082 | t3m_01438 | Product_name   | FR47-like protein                                               |          |
| 2572233082 | t3m_01438 | Scaffold       | t3m_contig_70_375_len_18148_read_count_1598522.37               |          |
| 2572233082 | t3m_01438 | Coordinates    | 5639..6427(+)                                                   |          |
| 2572233082 | t3m_01438 | DNA_length     | 789bp                                                           |          |

|            |           |                |                                            |                                                   |          |
|------------|-----------|----------------|--------------------------------------------|---------------------------------------------------|----------|
| 2572233082 | t3m_01438 | Protein_length |                                            | 262aa                                             |          |
| 2572233082 | t3m_01438 | GC             |                                            |                                                   | 0.66     |
| 2572233083 | t3m_01439 | COG_category   | [R] General function prediction only       |                                                   |          |
| 2572233083 | t3m_01439 | COG0384        | Predicted epimerase, PhzC/PhzF homolog     |                                                   | 9.00E-61 |
| 2572233083 | t3m_01439 | pfam02567      | PhzC-PhzF                                  |                                                   | 5.50E-53 |
| 2572233083 | t3m_01439 | TIGR00654      | phenazine biosynthesis protein PhzF family |                                                   | 8.10E-58 |
| 2572233083 | t3m_01439 | Locus_type     |                                            | CDS                                               |          |
| 2572233083 | t3m_01439 | Product_name   |                                            | phenazine biosynthesis protein PhzF family        |          |
| 2572233083 | t3m_01439 | Scaffold       |                                            | t3m_contig_70_375_len_18148_read_count_1598522.37 |          |
| 2572233083 | t3m_01439 | Coordinates    |                                            | 6536..7417(+)                                     |          |
| 2572233083 | t3m_01439 | DNA_length     |                                            | 882bp                                             |          |
| 2572233083 | t3m_01439 | Protein_length |                                            | 293aa                                             |          |
| 2572233083 | t3m_01439 | GC             |                                            |                                                   | 0.67     |
| 2572233084 | t3m_01440 | Locus_type     |                                            | CDS                                               |          |
| 2572233084 | t3m_01440 | Product_name   |                                            | hypothetical protein                              |          |
| 2572233084 | t3m_01440 | Scaffold       |                                            | t3m_contig_70_375_len_18148_read_count_1598522.37 |          |
| 2572233084 | t3m_01440 | Coordinates    |                                            | 7414..7635(-)                                     |          |
| 2572233084 | t3m_01440 | DNA_length     |                                            | 222bp                                             |          |
| 2572233084 | t3m_01440 | Protein_length |                                            | 73aa                                              |          |
| 2572233084 | t3m_01440 | GC             |                                            |                                                   | 0.62     |
| 2572233085 | t3m_01441 | pfam13485      | Peptidase_MA_2                             |                                                   | 7.50E-05 |
| 2572233085 | t3m_01441 | Locus_type     |                                            | CDS                                               |          |
| 2572233085 | t3m_01441 | Product_name   |                                            | Peptidase MA superfamily                          |          |
| 2572233085 | t3m_01441 | Scaffold       |                                            | t3m_contig_70_375_len_18148_read_count_1598522.37 |          |
| 2572233085 | t3m_01441 | Coordinates    |                                            | 7714..8412(-)                                     |          |
| 2572233085 | t3m_01441 | DNA_length     |                                            | 699bp                                             |          |
| 2572233085 | t3m_01441 | Protein_length |                                            | 232aa                                             |          |
| 2572233085 | t3m_01441 | GC             |                                            |                                                   | 0.68     |
| 2572233085 | t3m_01441 | Transmembrane  |                                            | Yes                                               |          |
| 2572233086 | t3m_01442 | Locus_type     |                                            | CDS                                               |          |

|            |           |                |                                                                         |          |
|------------|-----------|----------------|-------------------------------------------------------------------------|----------|
| 2572233086 | t3m_01442 | Product_name   | hypothetical protein                                                    |          |
| 2572233086 | t3m_01442 | Scaffold       | t3m_contig_70_375_len_18148_read_count_1598522.37                       |          |
| 2572233086 | t3m_01442 | Coordinates    | 8938..9186(+)                                                           |          |
| 2572233086 | t3m_01442 | DNA_length     | 249bp                                                                   |          |
| 2572233086 | t3m_01442 | Protein_length | 82aa                                                                    |          |
| 2572233086 | t3m_01442 | GC             |                                                                         | 0.7      |
|            |           |                |                                                                         |          |
| 2572233087 | t3m_01443 | Locus_type     | CDS                                                                     |          |
| 2572233087 | t3m_01443 | Product_name   | hypothetical protein                                                    |          |
| 2572233087 | t3m_01443 | Scaffold       | t3m_contig_70_375_len_18148_read_count_1598522.37                       |          |
| 2572233087 | t3m_01443 | Coordinates    | 9402..9686(+)                                                           |          |
| 2572233087 | t3m_01443 | DNA_length     | 285bp                                                                   |          |
| 2572233087 | t3m_01443 | Protein_length | 94aa                                                                    |          |
| 2572233087 | t3m_01443 | GC             |                                                                         | 0.69     |
|            |           |                |                                                                         |          |
| 2572233088 | t3m_01444 | COG_category   | [R] General function prediction only                                    |          |
| 2572233088 | t3m_01444 | COG0596        | Predicted hydrolases or acyltransferases (alpha/beta hydrolase superfa  | 3.00E-12 |
| 2572233088 | t3m_01444 | pfam12697      | Abhydrolase_6                                                           | 1.30E-22 |
| 2572233088 | t3m_01444 | Locus_type     | CDS                                                                     |          |
| 2572233088 | t3m_01444 | Product_name   | Predicted hydrolases or acyltransferases (alpha/beta hydrolase superfan |          |
| 2572233088 | t3m_01444 | Scaffold       | t3m_contig_70_375_len_18148_read_count_1598522.37                       |          |
| 2572233088 | t3m_01444 | Coordinates    | 9683..10483(+)                                                          |          |
| 2572233088 | t3m_01444 | DNA_length     | 801bp                                                                   |          |
| 2572233088 | t3m_01444 | Protein_length | 266aa                                                                   |          |
| 2572233088 | t3m_01444 | GC             |                                                                         | 0.69     |
|            |           |                |                                                                         |          |
| 2572233089 | t3m_01445 | Locus_type     | CDS                                                                     |          |
| 2572233089 | t3m_01445 | Product_name   | hypothetical protein                                                    |          |
| 2572233089 | t3m_01445 | Scaffold       | t3m_contig_70_375_len_18148_read_count_1598522.37                       |          |
| 2572233089 | t3m_01445 | Coordinates    | 10599..11231(-)                                                         |          |
| 2572233089 | t3m_01445 | DNA_length     | 633bp                                                                   |          |
| 2572233089 | t3m_01445 | Protein_length | 210aa                                                                   |          |
| 2572233089 | t3m_01445 | GC             |                                                                         | 0.65     |
| 2572233089 | t3m_01445 | Transmembrane  | Yes                                                                     |          |

|            |           |                |                                                       |          |
|------------|-----------|----------------|-------------------------------------------------------|----------|
| 2572233090 | t3m_01446 | Metacyc        | TRYPDEG-PWY: tryptophan degradation II (via pyruvate) |          |
| 2572233090 | t3m_01446 | COG_category   | [E] Amino acid transport and metabolism               |          |
| 2572233090 | t3m_01446 | COG3033        | Tryptophanase                                         | 0.00E+00 |
| 2572233090 | t3m_01446 | pfam01212      | Beta_elim_lyase                                       | 8.30E-79 |
| 2572233090 | t3m_01446 | EC:4.1.99.1    | Tryptophanase.                                        |          |
| 2572233090 | t3m_01446 | KO:K01667      | tryptophanase [EC:4.1.99.1]                           | 0.00E+00 |
| 2572233090 | t3m_01446 | Locus_type     | CDS                                                   |          |
| 2572233090 | t3m_01446 | Product_name   | Tryptophanase                                         |          |
| 2572233090 | t3m_01446 | Scaffold       | t3m_contig_70_375_len_18148_read_count_1598522.37     |          |
| 2572233090 | t3m_01446 | Coordinates    | 11410..12810(+)                                       |          |
| 2572233090 | t3m_01446 | DNA_length     | 1401bp                                                |          |
| 2572233090 | t3m_01446 | Protein_length | 466aa                                                 |          |
| 2572233090 | t3m_01446 | GC             |                                                       | 0.67     |
|            |           |                |                                                       |          |
| 2572233091 | t3m_01447 | pfam08327      | AHSA1                                                 | 1.80E-18 |
| 2572233091 | t3m_01447 | Locus_type     | CDS                                                   |          |
| 2572233091 | t3m_01447 | Product_name   | Activator of Hsp90 ATPase homolog 1-like protein      |          |
| 2572233091 | t3m_01447 | Scaffold       | t3m_contig_70_375_len_18148_read_count_1598522.37     |          |
| 2572233091 | t3m_01447 | Coordinates    | 12912..13304(+)                                       |          |
| 2572233091 | t3m_01447 | DNA_length     | 393bp                                                 |          |
| 2572233091 | t3m_01447 | Protein_length | 130aa                                                 |          |
| 2572233091 | t3m_01447 | GC             |                                                       | 0.66     |
|            |           |                |                                                       |          |
| 2572233092 | t3m_01448 | Locus_type     | CDS                                                   |          |
| 2572233092 | t3m_01448 | Product_name   | hypothetical protein                                  |          |
| 2572233092 | t3m_01448 | Scaffold       | t3m_contig_70_375_len_18148_read_count_1598522.37     |          |
| 2572233092 | t3m_01448 | Coordinates    | 13403..13921(+)                                       |          |
| 2572233092 | t3m_01448 | DNA_length     | 519bp                                                 |          |
| 2572233092 | t3m_01448 | Protein_length | 172aa                                                 |          |
| 2572233092 | t3m_01448 | GC             |                                                       | 0.74     |
|            |           |                |                                                       |          |
| 2572233093 | t3m_01449 | COG_category   | [S] Function unknown                                  |          |
| 2572233093 | t3m_01449 | COG3342        | Uncharacterized conserved protein                     | 2.00E-58 |

|            |           |                |                                                                       |                                                                       |          |
|------------|-----------|----------------|-----------------------------------------------------------------------|-----------------------------------------------------------------------|----------|
| 2572233093 | t3m_01449 | pfam06267      | DUF1028                                                               |                                                                       | 8.20E-69 |
| 2572233093 | t3m_01449 | Locus_type     |                                                                       | CDS                                                                   |          |
| 2572233093 | t3m_01449 | Product_name   |                                                                       | Uncharacterized conserved protein                                     |          |
| 2572233093 | t3m_01449 | Scaffold       |                                                                       | t3m_contig_70_375_len_18148_read_count_1598522.37                     |          |
| 2572233093 | t3m_01449 | Coordinates    |                                                                       | 13976..14680(+)                                                       |          |
| 2572233093 | t3m_01449 | DNA_length     |                                                                       | 705bp                                                                 |          |
| 2572233093 | t3m_01449 | Protein_length |                                                                       | 234aa                                                                 |          |
| 2572233093 | t3m_01449 | GC             |                                                                       |                                                                       | 0.69     |
| 2572233094 | t3m_01450 | COG_category   | [T] Signal transduction mechanisms                                    |                                                                       |          |
| 2572233094 | t3m_01450 | COG0589        | Universal stress protein UspA and related nucleotide-binding proteins |                                                                       | 1.00E-14 |
| 2572233094 | t3m_01450 | pfam00582      | Usp                                                                   |                                                                       | 9.00E-30 |
| 2572233094 | t3m_01450 | Locus_type     |                                                                       | CDS                                                                   |          |
| 2572233094 | t3m_01450 | Product_name   |                                                                       | Universal stress protein UspA and related nucleotide-binding proteins |          |
| 2572233094 | t3m_01450 | Scaffold       |                                                                       | t3m_contig_70_375_len_18148_read_count_1598522.37                     |          |
| 2572233094 | t3m_01450 | Coordinates    |                                                                       | 14730..15185(-)                                                       |          |
| 2572233094 | t3m_01450 | DNA_length     |                                                                       | 456bp                                                                 |          |
| 2572233094 | t3m_01450 | Protein_length |                                                                       | 151aa                                                                 |          |
| 2572233094 | t3m_01450 | GC             |                                                                       |                                                                       | 0.68     |
| 2572233095 | t3m_01451 | KEGG_module    | M00362: Nucleotide sugar biosynthesis, prokaryotes                    |                                                                       |          |
| 2572233095 | t3m_01451 | KEGG_module    | M00361: Nucleotide sugar biosynthesis, eukaryotes                     |                                                                       |          |
| 2572233095 | t3m_01451 | KEGG_module    | M00114: Ascorbate biosynthesis, plants, glucose-6P => ascorbate       |                                                                       |          |
| 2572233095 | t3m_01451 | Metacyc        | PWY-6073: alginate biosynthesis I                                     |                                                                       |          |
| 2572233095 | t3m_01451 | Metacyc        | PWY-5659: GDP-mannose biosynthesis                                    |                                                                       |          |
| 2572233095 | t3m_01451 | Metacyc        | PWY-882: L-ascorbate biosynthesis I (L-galactose pathway)             |                                                                       |          |
| 2572233095 | t3m_01451 | Metacyc        | PWY-6082: alginate biosynthesis II                                    |                                                                       |          |
| 2572233095 | t3m_01451 | COG_category   | [J] Translation, ribosomal structure and biogenesis                   |                                                                       |          |
| 2572233095 | t3m_01451 | COG_category   | [M] Cell wall/membrane/envelope biogenesis                            |                                                                       |          |
| 2572233095 | t3m_01451 | COG1208        | Nucleoside-diphosphate-sugar pyrophosphorylase involved in lipopolys  |                                                                       | 9.00E-64 |
| 2572233095 | t3m_01451 | pfam00483      | NTP_transferase                                                       |                                                                       | 3.30E-30 |
| 2572233095 | t3m_01451 | EC:2.7.7.13    | Mannose-1-phosphate guanylyltransferase.                              |                                                                       |          |
| 2572233095 | t3m_01451 | KO:K00966      | mannose-1-phosphate guanylyltransferase [EC:2.7.7.13]                 |                                                                       | 0.00E+00 |
| 2572233095 | t3m_01451 | Locus_type     |                                                                       | CDS                                                                   |          |

|            |           |                |                                                                       |          |
|------------|-----------|----------------|-----------------------------------------------------------------------|----------|
| 2572233095 | t3m_01451 | Product_name   | Nucleoside-diphosphate-sugar pyrophosphorylase involved in lipopolysa |          |
| 2572233095 | t3m_01451 | Scaffold       | t3m_contig_70_375_len_18148_read_count_1598522.37                     |          |
| 2572233095 | t3m_01451 | Coordinates    | 15355..16329(+)                                                       |          |
| 2572233095 | t3m_01451 | DNA_length     | 975bp                                                                 |          |
| 2572233095 | t3m_01451 | Protein_length | 324aa                                                                 |          |
| 2572233095 | t3m_01451 | GC             |                                                                       | 0.69     |
|            |           |                |                                                                       |          |
| 2572233096 | t3m_01452 | Metacyc        | PWY-4101: sorbitol degradation I                                      |          |
| 2572233096 | t3m_01452 | Metacyc        | PWY-6693: galactose degradation IV                                    |          |
| 2572233096 | t3m_01452 | COG_category   | [E] Amino acid transport and metabolism                               |          |
| 2572233096 | t3m_01452 | COG_category   | [R] General function prediction only                                  |          |
| 2572233096 | t3m_01452 | COG1063        | Threonine dehydrogenase and related Zn-dependent dehydrogenases       | 8.00E-54 |
| 2572233096 | t3m_01452 | pfam00107      | ADH_zinc_N                                                            | 3.30E-17 |
| 2572233096 | t3m_01452 | pfam08240      | ADH_N                                                                 | 6.30E-26 |
| 2572233096 | t3m_01452 | EC:1.1.1.14    | L-idoitol 2-dehydrogenase.                                            |          |
| 2572233096 | t3m_01452 | TIGR01202      | 2-desacetyl-2-hydroxyethyl bacteriochlorophyllide A dehydrogenase     | 2.20E-22 |
| 2572233096 | t3m_01452 | KO:K00008      | L-idoitol 2-dehydrogenase [EC:1.1.1.14]                               | 0.00E+00 |
| 2572233096 | t3m_01452 | Locus_type     | CDS                                                                   |          |
| 2572233096 | t3m_01452 | Product_name   | Threonine dehydrogenase and related Zn-dependent dehydrogenases       |          |
| 2572233096 | t3m_01452 | Scaffold       | t3m_contig_70_375_len_18148_read_count_1598522.37                     |          |
| 2572233096 | t3m_01452 | Coordinates    | 16342..17385(-)                                                       |          |
| 2572233096 | t3m_01452 | DNA_length     | 1044bp                                                                |          |
| 2572233096 | t3m_01452 | Protein_length | 347aa                                                                 |          |
| 2572233096 | t3m_01452 | GC             |                                                                       | 0.72     |
|            |           |                |                                                                       |          |
| 2572233097 | t3m_01453 | KEGG_module    | M00027: GABA (gamma-Aminobutyrate) shunt                              |          |
| 2572233097 | t3m_01453 | Metacyc        | PWY-4321: glutamate degradation IV                                    |          |
| 2572233097 | t3m_01453 | Metacyc        | PWY-6536: 4-aminobutyrate degradation III                             |          |
| 2572233097 | t3m_01453 | Metacyc        | PWY-6537: 4-aminobutyrate degradation II                              |          |
| 2572233097 | t3m_01453 | Metacyc        | PWY-5022: 4-aminobutyrate degradation V                               |          |
| 2572233097 | t3m_01453 | Metacyc        | GLUDEG-I-PWY: glutamate degradation III (via 4-aminobutyrate)         |          |
| 2572233097 | t3m_01453 | Metacyc        | PWY-6535: 4-aminobutyrate degradation I                               |          |
| 2572233097 | t3m_01453 | Metacyc        | BETA-ALA-DEGRADATION-I-PWY: &beta;-alanine degradation I              |          |
| 2572233097 | t3m_01453 | Metacyc        | P181-PWY: nicotine degradation I                                      |          |

|            |           |                |                                                                            |          |
|------------|-----------|----------------|----------------------------------------------------------------------------|----------|
| 2572233097 | t3m_01453 | pfam00202      | Aminotran_3                                                                | 7.10E-58 |
| 2572233097 | t3m_01453 | EC:2.6.1.19    | 4-aminobutyrate--2-oxoglutarate transaminase.                              |          |
| 2572233097 | t3m_01453 | KO:K00823      | 4-aminobutyrate aminotransferase [EC:2.6.1.19]                             | 0.00E+00 |
| 2572233097 | t3m_01453 | Locus_type     | CDS                                                                        |          |
| 2572233097 | t3m_01453 | Product_name   | Aminotransferase class-III                                                 |          |
| 2572233097 | t3m_01453 | Scaffold       | t3m_contig_70_375_len_18148_read_count_1598522.37                          |          |
| 2572233097 | t3m_01453 | Coordinates    | 17382..18146(-)                                                            |          |
| 2572233097 | t3m_01453 | DNA_length     | 765bp                                                                      |          |
| 2572233097 | t3m_01453 | Protein_length | 254aa                                                                      |          |
| 2572233097 | t3m_01453 | GC             |                                                                            | 0.67     |
| 2572233098 | t3m_01454 | KEGG_module    | M00173: Reductive citric acid cycle (Arnon-Buchanan cycle)                 |          |
| 2572233098 | t3m_01454 | KEGG_module    | M00310: Pyruvate:ferredoxin oxidoreductase                                 |          |
| 2572233098 | t3m_01454 | KEGG_module    | M00307: Pyruvate oxidation, pyruvate => acetyl-CoA                         |          |
| 2572233098 | t3m_01454 | KEGG_module    | M00374: Dicarboxylate-hydroxybutyrate cycle                                |          |
| 2572233098 | t3m_01454 | Metacyc        | P142-PWY: pyruvate fermentation to acetate I                               |          |
| 2572233098 | t3m_01454 | Metacyc        | PWY-6588: pyruvate fermentation to acetone                                 |          |
| 2572233098 | t3m_01454 | Metacyc        | PWY-6587: pyruvate fermentation to ethanol III                             |          |
| 2572233098 | t3m_01454 | Metacyc        | PWY-5493: reductive monocarboxylic acid cycle                              |          |
| 2572233098 | t3m_01454 | Metacyc        | PWY-5497: purine nucleobases degradation II (anaerobic)                    |          |
| 2572233098 | t3m_01454 | Metacyc        | NPGLUCAT-PWY: Entner-Doudoroff pathway II (non-phosphorylative)            |          |
| 2572233098 | t3m_01454 | Metacyc        | PWY-5538: pyruvate fermentation to acetate VI                              |          |
| 2572233098 | t3m_01454 | Metacyc        | PWY-6876: isopropanol biosynthesis                                         |          |
| 2572233098 | t3m_01454 | Metacyc        | P23-PWY: reductive TCA cycle I                                             |          |
| 2572233098 | t3m_01454 | Metacyc        | PWY-6142: gluconeogenesis II (<i>Methanobacterium thermoautotrophicum</i>) |          |
| 2572233098 | t3m_01454 | Metacyc        | PWY-6863: pyruvate fermentation to hexanol                                 |          |
| 2572233098 | t3m_01454 | Metacyc        | PWY-6583: pyruvate fermentation to butanol I                               |          |
| 2572233098 | t3m_01454 | Metacyc        | PWY-5600: pyruvate fermentation to acetate VII                             |          |
| 2572233098 | t3m_01454 | Metacyc        | PWY-7003: glycerol degradation to butanol                                  |          |
| 2572233098 | t3m_01454 | Metacyc        | PWY-5483: pyruvate fermentation to acetate III                             |          |
| 2572233098 | t3m_01454 | Metacyc        | CENTFERM-PWY: pyruvate fermentation to butanoate                           |          |
| 2572233098 | t3m_01454 | Metacyc        | GLUDEG-II-PWY: glutamate degradation VII (to butanoate)                    |          |
| 2572233098 | t3m_01454 | Metacyc        | PWY-5392: reductive TCA cycle II                                           |          |
| 2572233098 | t3m_01454 | Metacyc        | P42-PWY: incomplete reductive TCA cycle                                    |          |

|            |           |                |                                                                                           |          |
|------------|-----------|----------------|-------------------------------------------------------------------------------------------|----------|
| 2572233098 | t3m_01454 | COG_category   | [C] Energy production and conversion                                                      |          |
| 2572233098 | t3m_01454 | COG1014        | Pyruvate:ferredoxin oxidoreductase and related 2-oxoacid:ferredoxin o                     | 5.00E-31 |
| 2572233098 | t3m_01454 | pfam01558      | POR                                                                                       | 2.10E-31 |
| 2572233098 | t3m_01454 | EC:1.2.7.1     | Pyruvate synthase.                                                                        |          |
| 2572233098 | t3m_01454 | TIGR02175      | 2-oxoacid:acceptor oxidoreductase, gamma subunit, pyruvate/2-ketois                       | 3.30E-62 |
| 2572233098 | t3m_01454 | KO:K00172      | pyruvate ferredoxin oxidoreductase, gamma subunit [EC:1.2.7.1]                            | 0.00E+00 |
| 2572233098 | t3m_01454 | ITERM:00696    | ketoisovalerate ferredoxin oxidoreductase, gamma subunit (EC 1.2.7.7)                     |          |
| 2572233098 | t3m_01454 | Locus_type     | CDS                                                                                       |          |
| 2572233098 | t3m_01454 | Product_name   | ketoisovalerate ferredoxin oxidoreductase, gamma subunit (EC 1.2.7.7)                     |          |
| 2572233098 | t3m_01454 | Scaffold       | t3m_contig_70_379_len_18070_read_count_1700211.38                                         |          |
| 2572233098 | t3m_01454 | Coordinates    | 3..755(-)                                                                                 |          |
| 2572233098 | t3m_01454 | DNA_length     | 753bp                                                                                     |          |
| 2572233098 | t3m_01454 | Protein_length | 251aa                                                                                     |          |
| 2572233098 | t3m_01454 | GC             |                                                                                           | 0.69     |
| 2572233099 | t3m_01455 | KEGG_module    | M00036: Leucine degradation, leucine => acetoacetate + acetyl-CoA                         |          |
| 2572233099 | t3m_01455 | KEGG_module    | M00570: Isoleucine biosynthesis, threonine => 2-oxobutanoate => isoleucine                |          |
| 2572233099 | t3m_01455 | KEGG_module    | M00019: Valine/isoleucine biosynthesis, pyruvate => valine / 2-oxobutanoate => isoleucine |          |
| 2572233099 | t3m_01455 | KEGG_module    | M00119: Pantothenate biosynthesis, valine/L-aspartate => pantothenate                     |          |
| 2572233099 | t3m_01455 | Metacyc        | ILEUSYN-PWY: isoleucine biosynthesis I (from threonine)                                   |          |
| 2572233099 | t3m_01455 | Metacyc        | PWY-5108: isoleucine biosynthesis V                                                       |          |
| 2572233099 | t3m_01455 | Metacyc        | VALDEG-PWY: valine degradation I                                                          |          |
| 2572233099 | t3m_01455 | Metacyc        | PWY-5078: isoleucine degradation II                                                       |          |
| 2572233099 | t3m_01455 | Metacyc        | PWY-5076: leucine degradation III                                                         |          |
| 2572233099 | t3m_01455 | Metacyc        | ALANINE-VALINESYN-PWY: alanine biosynthesis I                                             |          |
| 2572233099 | t3m_01455 | Metacyc        | PWY-5101: isoleucine biosynthesis II                                                      |          |
| 2572233099 | t3m_01455 | Metacyc        | LEUSYN-PWY: leucine biosynthesis                                                          |          |
| 2572233099 | t3m_01455 | Metacyc        | VALSYN-PWY: valine biosynthesis                                                           |          |
| 2572233099 | t3m_01455 | Metacyc        | PWY-5104: isoleucine biosynthesis IV                                                      |          |
| 2572233099 | t3m_01455 | Metacyc        | PWY-5057: valine degradation II                                                           |          |
| 2572233099 | t3m_01455 | Metacyc        | PWY-5103: isoleucine biosynthesis III                                                     |          |
| 2572233099 | t3m_01455 | Metacyc        | LEU-DEG2-PWY: leucine degradation I                                                       |          |
| 2572233099 | t3m_01455 | Metacyc        | ILEUDEG-PWY: isoleucine degradation I                                                     |          |
| 2572233099 | t3m_01455 | COG_category   | [E] Amino acid transport and metabolism                                                   |          |



|            |           |                |                                                                   |           |
|------------|-----------|----------------|-------------------------------------------------------------------|-----------|
| 2572233099 | t3m_01455 | COG_category   | [H] Coenzyme transport and metabolism                             |           |
| 2572233099 | t3m_01455 | COG0115        | Branched-chain amino acid aminotransferase/4-amino-4-deoxychorism | 3.00E-65  |
| 2572233099 | t3m_01455 | pfam01063      | Aminotran_4                                                       | 5.50E-41  |
| 2572233099 | t3m_01455 | EC:2.6.1.42    | Branched-chain-amino-acid transaminase.                           |           |
| 2572233099 | t3m_01455 | TIGR01122      | branched-chain amino acid aminotransferase, group I               | 2.90E-117 |
| 2572233099 | t3m_01455 | KO:K00826      | branched-chain amino acid aminotransferase [EC:2.6.1.42]          | 0.00E+00  |
| 2572233099 | t3m_01455 | Locus_type     | CDS                                                               |           |
| 2572233099 | t3m_01455 | Product_name   | branched-chain amino acid aminotransferase, group I               |           |
| 2572233099 | t3m_01455 | Scaffold       | t3m_contig_70_379_len_18070_read_count_1700211.38                 |           |
| 2572233099 | t3m_01455 | Coordinates    | 855..1775(+)                                                      |           |
| 2572233099 | t3m_01455 | DNA_length     | 921bp                                                             |           |
| 2572233099 | t3m_01455 | Protein_length | 306aa                                                             |           |
| 2572233099 | t3m_01455 | GC             |                                                                   | 0.65      |
| 2572233100 | t3m_01456 | COG_category   | [O] Posttranslational modification, protein turnover, chaperones  |           |
| 2572233100 | t3m_01456 | COG0309        | Hydrogenase maturation factor                                     | 1.00E-86  |
| 2572233100 | t3m_01456 | pfam02769      | AIRS_C                                                            | 3.10E-17  |
| 2572233100 | t3m_01456 | pfam00586      | AIRS                                                              | 3.60E-15  |
| 2572233100 | t3m_01456 | TIGR02124      | hydrogenase expression/formation protein HypE                     | 6.20E-130 |
| 2572233100 | t3m_01456 | KO:K04655      | hydrogenase expression/formation protein HypE                     | 0.00E+00  |
| 2572233100 | t3m_01456 | Locus_type     | CDS                                                               |           |
| 2572233100 | t3m_01456 | Product_name   | Hydrogenase maturation protein, carbamoyl dehydratase HypE        |           |
| 2572233100 | t3m_01456 | Scaffold       | t3m_contig_70_379_len_18070_read_count_1700211.38                 |           |
| 2572233100 | t3m_01456 | Coordinates    | 1831..2871(-)                                                     |           |
| 2572233100 | t3m_01456 | DNA_length     | 1041bp                                                            |           |
| 2572233100 | t3m_01456 | Protein_length | 346aa                                                             |           |
| 2572233100 | t3m_01456 | GC             |                                                                   | 0.68      |
| 2572233101 | t3m_01457 | COG_category   | [O] Posttranslational modification, protein turnover, chaperones  |           |
| 2572233101 | t3m_01457 | COG0409        | Hydrogenase maturation factor                                     | 0.00E+00  |
| 2572233101 | t3m_01457 | pfam01924      | HypD                                                              | 0.00E+00  |
| 2572233101 | t3m_01457 | TIGR00075      | hydrogenase expression/formation protein HypD                     | 0.00E+00  |
| 2572233101 | t3m_01457 | KO:K04654      | hydrogenase expression/formation protein HypD                     | 0.00E+00  |
| 2572233101 | t3m_01457 | Locus_type     | CDS                                                               |           |

|            |           |                |                                                                  |          |
|------------|-----------|----------------|------------------------------------------------------------------|----------|
| 2572233101 | t3m_01457 | Product_name   | hydrogenase expression/formation protein HypD                    |          |
| 2572233101 | t3m_01457 | Scaffold       | t3m_contig_70_379_len_18070_read_count_1700211.38                |          |
| 2572233101 | t3m_01457 | Coordinates    | 2868..4001(-)                                                    |          |
| 2572233101 | t3m_01457 | DNA_length     | 1134bp                                                           |          |
| 2572233101 | t3m_01457 | Protein_length | 377aa                                                            |          |
| 2572233101 | t3m_01457 | GC             |                                                                  | 0.67     |
|            |           |                |                                                                  |          |
| 2572233102 | t3m_01458 | COG_category   | [O] Posttranslational modification, protein turnover, chaperones |          |
| 2572233102 | t3m_01458 | COG0298        | Hydrogenase maturation factor                                    | 3.00E-16 |
| 2572233102 | t3m_01458 | pfam01455      | HupF_HypC                                                        | 1.80E-25 |
| 2572233102 | t3m_01458 | TIGR00074      | hydrogenase assembly chaperone HypC/HupF                         | 3.30E-25 |
| 2572233102 | t3m_01458 | KO:K04653      | hydrogenase expression/formation protein HypC                    | 5.20E-21 |
| 2572233102 | t3m_01458 | Locus_type     | CDS                                                              |          |
| 2572233102 | t3m_01458 | Product_name   | hydrogenase assembly chaperone HypC/HupF                         |          |
| 2572233102 | t3m_01458 | Scaffold       | t3m_contig_70_379_len_18070_read_count_1700211.38                |          |
| 2572233102 | t3m_01458 | Coordinates    | 3998..4273(-)                                                    |          |
| 2572233102 | t3m_01458 | DNA_length     | 276bp                                                            |          |
| 2572233102 | t3m_01458 | Protein_length | 91aa                                                             |          |
| 2572233102 | t3m_01458 | GC             |                                                                  | 0.68     |
|            |           |                |                                                                  |          |
| 2572233103 | t3m_01459 | COG_category   | [O] Posttranslational modification, protein turnover, chaperones |          |
| 2572233103 | t3m_01459 | COG0068        | Hydrogenase maturation factor                                    | 0.00E+00 |
| 2572233103 | t3m_01459 | pfam07503      | zf-HYPF                                                          | 6.20E-17 |
| 2572233103 | t3m_01459 | pfam01300      | Sua5_yciO_yrdC                                                   | 4.20E-51 |
| 2572233103 | t3m_01459 | pfam07503      | zf-HYPF                                                          | 1.10E-11 |
| 2572233103 | t3m_01459 | TIGR00143      | [NiFe] hydrogenase maturation protein HypF                       | 0.00E+00 |
| 2572233103 | t3m_01459 | KO:K04656      | hydrogenase maturation protein HypF                              | 0.00E+00 |
| 2572233103 | t3m_01459 | Locus_type     | CDS                                                              |          |
| 2572233103 | t3m_01459 | Product_name   | [NiFe] hydrogenase maturation protein HypF                       |          |
| 2572233103 | t3m_01459 | Scaffold       | t3m_contig_70_379_len_18070_read_count_1700211.38                |          |
| 2572233103 | t3m_01459 | Coordinates    | 4287..6248(-)                                                    |          |
| 2572233103 | t3m_01459 | DNA_length     | 1962bp                                                           |          |
| 2572233103 | t3m_01459 | Protein_length | 653aa                                                            |          |
| 2572233103 | t3m_01459 | GC             |                                                                  | 0.66     |

|            |           |                |                                                   |          |
|------------|-----------|----------------|---------------------------------------------------|----------|
| 2572233104 | t3m_01460 | Locus_type     | CDS                                               |          |
| 2572233104 | t3m_01460 | Product_name   | hypothetical protein                              |          |
| 2572233104 | t3m_01460 | Scaffold       | t3m_contig_70_379_len_18070_read_count_1700211.38 |          |
| 2572233104 | t3m_01460 | Coordinates    | 6471..6686(+)                                     |          |
| 2572233104 | t3m_01460 | DNA_length     | 216bp                                             |          |
| 2572233104 | t3m_01460 | Protein_length | 71aa                                              |          |
| 2572233104 | t3m_01460 | GC             |                                                   | 0.63     |
|            |           |                |                                                   |          |
| 2572233105 | t3m_01461 | Locus_type     | CDS                                               |          |
| 2572233105 | t3m_01461 | Product_name   | hypothetical protein                              |          |
| 2572233105 | t3m_01461 | Scaffold       | t3m_contig_70_379_len_18070_read_count_1700211.38 |          |
| 2572233105 | t3m_01461 | Coordinates    | 6875..8932(+)                                     |          |
| 2572233105 | t3m_01461 | DNA_length     | 2058bp                                            |          |
| 2572233105 | t3m_01461 | Protein_length | 685aa                                             |          |
| 2572233105 | t3m_01461 | GC             |                                                   | 0.63     |
| 2572233105 | t3m_01461 | Transmembrane  | Yes                                               |          |
|            |           |                |                                                   |          |
| 2572233106 | t3m_01462 | COG_category   | [M] Cell wall/membrane/envelope biogenesis        |          |
| 2572233106 | t3m_01462 | COG0438        | Glycosyltransferase                               | 3.00E-20 |
| 2572233106 | t3m_01462 | pfam13692      | Glyco_trans_1_4                                   | 1.20E-13 |
| 2572233106 | t3m_01462 | pfam13579      | Glyco_trans_4_4                                   | 1.50E-09 |
| 2572233106 | t3m_01462 | Locus_type     | CDS                                               |          |
| 2572233106 | t3m_01462 | Product_name   | Glycosyltransferase                               |          |
| 2572233106 | t3m_01462 | Scaffold       | t3m_contig_70_379_len_18070_read_count_1700211.38 |          |
| 2572233106 | t3m_01462 | Coordinates    | 9430..10515(+)                                    |          |
| 2572233106 | t3m_01462 | DNA_length     | 1086bp                                            |          |
| 2572233106 | t3m_01462 | Protein_length | 361aa                                             |          |
| 2572233106 | t3m_01462 | GC             |                                                   | 0.61     |
|            |           |                |                                                   |          |
| 2572233107 | t3m_01463 | pfam09852      | DUF2079                                           | 2.70E-40 |
| 2572233107 | t3m_01463 | Locus_type     | CDS                                               |          |
| 2572233107 | t3m_01463 | Product_name   | Predicted membrane protein (DUF2079)              |          |
| 2572233107 | t3m_01463 | Scaffold       | t3m_contig_70_379_len_18070_read_count_1700211.38 |          |

|            |           |                |                                            |                                                   |          |
|------------|-----------|----------------|--------------------------------------------|---------------------------------------------------|----------|
| 2572233107 | t3m_01463 | Coordinates    |                                            | 10749..12968(+)                                   |          |
| 2572233107 | t3m_01463 | DNA_length     |                                            | 2220bp                                            |          |
| 2572233107 | t3m_01463 | Protein_length |                                            | 739aa                                             |          |
| 2572233107 | t3m_01463 | GC             |                                            |                                                   | 0.6      |
| 2572233107 | t3m_01463 | Transmembrane  |                                            | Yes                                               |          |
| 2572233108 | t3m_01464 | pfam00535      | Glycos_transf_2                            |                                                   | 1.10E-13 |
| 2572233108 | t3m_01464 | Locus_type     |                                            | CDS                                               |          |
| 2572233108 | t3m_01464 | Product_name   |                                            | Glycosyl transferase family 2                     |          |
| 2572233108 | t3m_01464 | Scaffold       |                                            | t3m_contig_70_379_len_18070_read_count_1700211.38 |          |
| 2572233108 | t3m_01464 | Coordinates    |                                            | 13060..14085(-)                                   |          |
| 2572233108 | t3m_01464 | DNA_length     |                                            | 1026bp                                            |          |
| 2572233108 | t3m_01464 | Protein_length |                                            | 341aa                                             |          |
| 2572233108 | t3m_01464 | GC             |                                            |                                                   | 0.59     |
| 2572233109 | t3m_01465 | COG_category   | [M] Cell wall/membrane/envelope biogenesis |                                                   |          |
| 2572233109 | t3m_01465 | COG0438        | Glycosyltransferase                        |                                                   | 1.00E-22 |
| 2572233109 | t3m_01465 | pfam13692      | Glyco_trans_1_4                            |                                                   | 1.90E-18 |
| 2572233109 | t3m_01465 | Locus_type     |                                            | CDS                                               |          |
| 2572233109 | t3m_01465 | Product_name   |                                            | Glycosyltransferase                               |          |
| 2572233109 | t3m_01465 | Scaffold       |                                            | t3m_contig_70_379_len_18070_read_count_1700211.38 |          |
| 2572233109 | t3m_01465 | Coordinates    |                                            | 14119..15267(-)                                   |          |
| 2572233109 | t3m_01465 | DNA_length     |                                            | 1149bp                                            |          |
| 2572233109 | t3m_01465 | Protein_length |                                            | 382aa                                             |          |
| 2572233109 | t3m_01465 | GC             |                                            |                                                   | 0.58     |
| 2572233110 | t3m_01466 | pfam03214      | RGP                                        |                                                   | 1.10E-16 |
| 2572233110 | t3m_01466 | Locus_type     |                                            | CDS                                               |          |
| 2572233110 | t3m_01466 | Product_name   |                                            | Reversibly glycosylated polypeptide               |          |
| 2572233110 | t3m_01466 | Scaffold       |                                            | t3m_contig_70_379_len_18070_read_count_1700211.38 |          |
| 2572233110 | t3m_01466 | Coordinates    |                                            | 15435..16583(-)                                   |          |
| 2572233110 | t3m_01466 | DNA_length     |                                            | 1149bp                                            |          |
| 2572233110 | t3m_01466 | Protein_length |                                            | 382aa                                             |          |
| 2572233110 | t3m_01466 | GC             |                                            |                                                   | 0.58     |

|            |           |                |                                                     |          |
|------------|-----------|----------------|-----------------------------------------------------|----------|
| 2572233111 | t3m_01467 | pfam00756      | Esterase                                            | 2.20E-24 |
| 2572233111 | t3m_01467 | KO:K07214      | enterochelin esterase and related enzymes           | 4.10E-41 |
| 2572233111 | t3m_01467 | Locus_type     | CDS                                                 |          |
| 2572233111 | t3m_01467 | Product_name   | Putative esterase                                   |          |
| 2572233111 | t3m_01467 | Scaffold       | t3m_contig_70_379_len_18070_read_count_1700211.38   |          |
| 2572233111 | t3m_01467 | Coordinates    | 16855..17436(-)                                     |          |
| 2572233111 | t3m_01467 | DNA_length     | 582bp                                               |          |
| 2572233111 | t3m_01467 | Protein_length | 193aa                                               |          |
| 2572233111 | t3m_01467 | GC             |                                                     | 0.66     |
|            |           |                |                                                     |          |
| 2572233112 | t3m_01468 | Locus_type     | CDS                                                 |          |
| 2572233112 | t3m_01468 | Product_name   | hypothetical protein                                |          |
| 2572233112 | t3m_01468 | Scaffold       | t3m_contig_70_379_len_18070_read_count_1700211.38   |          |
| 2572233112 | t3m_01468 | Coordinates    | 17443..17664(-)                                     |          |
| 2572233112 | t3m_01468 | DNA_length     | 222bp                                               |          |
| 2572233112 | t3m_01468 | Protein_length | 73aa                                                |          |
| 2572233112 | t3m_01468 | GC             |                                                     | 0.64     |
|            |           |                |                                                     |          |
| 2572233113 | t3m_01469 | Locus_type     | tRNA                                                |          |
| 2572233113 | t3m_01469 | Product_name   | tRNA_Thr_GGT                                        |          |
| 2572233113 | t3m_01469 | Scaffold       | t3m_contig_70_379_len_18070_read_count_1700211.38   |          |
| 2572233113 | t3m_01469 | Coordinates    | 18006..18069(-)                                     |          |
| 2572233113 | t3m_01469 | DNA_length     | 64bp                                                |          |
| 2572233113 | t3m_01469 | GC             |                                                     | 0.64     |
|            |           |                |                                                     |          |
| 2572233114 | t3m_01470 | KEGG_module    | M00179: Ribosome, archaea                           |          |
| 2572233114 | t3m_01470 | KEGG_module    | M00178: Ribosome, bacteria                          |          |
| 2572233114 | t3m_01470 | COG_category   | [J] Translation, ribosomal structure and biogenesis |          |
| 2572233114 | t3m_01470 | COG0051        | Ribosomal protein S10                               | 3.00E-29 |
| 2572233114 | t3m_01470 | pfam00338      | Ribosomal_S10                                       | 3.30E-28 |
| 2572233114 | t3m_01470 | TIGR01046      | ribosomal protein S10(archaeal)/S20(eukaryotic)     | 2.00E-49 |
| 2572233114 | t3m_01470 | KO:K02946      | small subunit ribosomal protein S10                 | 2.20E-37 |
| 2572233114 | t3m_01470 | Locus_type     | CDS                                                 |          |

|            |           |                |                                                            |          |
|------------|-----------|----------------|------------------------------------------------------------|----------|
| 2572233114 | t3m_01470 | Product_name   | SSU ribosomal protein S10P                                 |          |
| 2572233114 | t3m_01470 | Scaffold       | t3m_contig_70_382_len_18025_read_count_1393314.39          |          |
| 2572233114 | t3m_01470 | Coordinates    | 79..390(+)                                                 |          |
| 2572233114 | t3m_01470 | DNA_length     | 312bp                                                      |          |
| 2572233114 | t3m_01470 | Protein_length | 103aa                                                      |          |
| 2572233114 | t3m_01470 | GC             |                                                            | 0.64     |
| 2572233115 | t3m_01471 | COG_category   | [I] Lipid transport and metabolism                         |          |
| 2572233115 | t3m_01471 | COG0688        | Phosphatidylserine decarboxylase                           | 3.00E-23 |
| 2572233115 | t3m_01471 | pfam02666      | PS_Dcarbxyase                                              | 1.20E-17 |
| 2572233115 | t3m_01471 | pfam01405      | PsbT                                                       | 1.90E-04 |
| 2572233115 | t3m_01471 | TIGR00164      | phosphatidylserine decarboxylase precursor-related protein | 1.60E-41 |
| 2572233115 | t3m_01471 | Locus_type     | CDS                                                        |          |
| 2572233115 | t3m_01471 | Product_name   | Phosphatidylserine decarboxylase                           |          |
| 2572233115 | t3m_01471 | Scaffold       | t3m_contig_70_382_len_18025_read_count_1393314.39          |          |
| 2572233115 | t3m_01471 | Coordinates    | 395..1024(+)                                               |          |
| 2572233115 | t3m_01471 | DNA_length     | 630bp                                                      |          |
| 2572233115 | t3m_01471 | Protein_length | 209aa                                                      |          |
| 2572233115 | t3m_01471 | GC             |                                                            | 0.73     |
| 2572233115 | t3m_01471 | Transmembrane  | Yes                                                        |          |
| 2572233116 | t3m_01472 | COG_category   | [I] Lipid transport and metabolism                         |          |
| 2572233116 | t3m_01472 | COG1183        | Phosphatidylserine synthase                                | 5.00E-18 |
| 2572233116 | t3m_01472 | pfam01066      | CDP-OH_P_transf                                            | 6.10E-09 |
| 2572233116 | t3m_01472 | Locus_type     | CDS                                                        |          |
| 2572233116 | t3m_01472 | Product_name   | Phosphatidylserine synthase                                |          |
| 2572233116 | t3m_01472 | Scaffold       | t3m_contig_70_382_len_18025_read_count_1393314.39          |          |
| 2572233116 | t3m_01472 | Coordinates    | 1021..1779(+)                                              |          |
| 2572233116 | t3m_01472 | DNA_length     | 759bp                                                      |          |
| 2572233116 | t3m_01472 | Protein_length | 252aa                                                      |          |
| 2572233116 | t3m_01472 | GC             |                                                            | 0.7      |
| 2572233116 | t3m_01472 | Transmembrane  | Yes                                                        |          |
| 2572233117 | t3m_01473 | COG_category   | [S] Function unknown                                       |          |

|            |           |                |                                                   |          |
|------------|-----------|----------------|---------------------------------------------------|----------|
| 2572233117 | t3m_01473 | COG2098        | Uncharacterized protein conserved in archaea      | 1.00E-23 |
| 2572233117 | t3m_01473 | pfam04038      | DUF381                                            | 4.80E-07 |
| 2572233117 | t3m_01473 | pfam04036      | DUF372                                            | 3.70E-16 |
| 2572233117 | t3m_01473 | KO:K09739      | hypothetical protein                              | 3.10E-16 |
| 2572233117 | t3m_01473 | Locus_type     | CDS                                               |          |
| 2572233117 | t3m_01473 | Product_name   | Uncharacterized protein conserved in archaea      |          |
| 2572233117 | t3m_01473 | Scaffold       | t3m_contig_70_382_len_18025_read_count_1393314.39 |          |
| 2572233117 | t3m_01473 | Coordinates    | 1776..2237(+)                                     |          |
| 2572233117 | t3m_01473 | DNA_length     | 462bp                                             |          |
| 2572233117 | t3m_01473 | Protein_length | 153aa                                             |          |
| 2572233117 | t3m_01473 | GC             |                                                   | 0.72     |
| 2572233118 | t3m_01474 | pfam07690      | MFS_1                                             | 1.60E-18 |
| 2572233118 | t3m_01474 | Locus_type     | CDS                                               |          |
| 2572233118 | t3m_01474 | Product_name   | Major Facilitator Superfamily                     |          |
| 2572233118 | t3m_01474 | Scaffold       | t3m_contig_70_382_len_18025_read_count_1393314.39 |          |
| 2572233118 | t3m_01474 | Coordinates    | 2194..3600(-)                                     |          |
| 2572233118 | t3m_01474 | DNA_length     | 1407bp                                            |          |
| 2572233118 | t3m_01474 | Protein_length | 468aa                                             |          |
| 2572233118 | t3m_01474 | GC             |                                                   | 0.67     |
| 2572233118 | t3m_01474 | Transmembrane  | Yes                                               |          |
| 2572233119 | t3m_01475 | pfam01037      | AsnC_trans_reg                                    | 3.40E-15 |
| 2572233119 | t3m_01475 | Locus_type     | CDS                                               |          |
| 2572233119 | t3m_01475 | Product_name   | AsnC family                                       |          |
| 2572233119 | t3m_01475 | Scaffold       | t3m_contig_70_382_len_18025_read_count_1393314.39 |          |
| 2572233119 | t3m_01475 | Coordinates    | 3758..3991(+)                                     |          |
| 2572233119 | t3m_01475 | DNA_length     | 234bp                                             |          |
| 2572233119 | t3m_01475 | Protein_length | 77aa                                              |          |
| 2572233119 | t3m_01475 | GC             |                                                   | 0.59     |
| 2572233120 | t3m_01476 | Locus_type     | CDS                                               |          |
| 2572233120 | t3m_01476 | Product_name   | hypothetical protein                              |          |
| 2572233120 | t3m_01476 | Scaffold       | t3m_contig_70_382_len_18025_read_count_1393314.39 |          |

|            |           |                |                                                                  |           |
|------------|-----------|----------------|------------------------------------------------------------------|-----------|
| 2572233120 | t3m_01476 | Coordinates    | 4002..4337(+)                                                    |           |
| 2572233120 | t3m_01476 | DNA_length     | 336bp                                                            |           |
| 2572233120 | t3m_01476 | Protein_length | 111aa                                                            |           |
| 2572233120 | t3m_01476 | GC             |                                                                  | 0.62      |
| 2572233120 | t3m_01476 | Transmembrane  | Yes                                                              |           |
| 2572233121 | t3m_01477 | COG_category   | [S] Function unknown                                             |           |
| 2572233121 | t3m_01477 | COG1912        | Uncharacterized conserved protein                                | 9.00E-52  |
| 2572233121 | t3m_01477 | pfam01887      | SAM_adenosyltransferase                                          | 1.20E-60  |
| 2572233121 | t3m_01477 | KO:K09134      | hypothetical protein                                             | 7.40E-37  |
| 2572233121 | t3m_01477 | Locus_type     | CDS                                                              |           |
| 2572233121 | t3m_01477 | Product_name   | Uncharacterized conserved protein                                |           |
| 2572233121 | t3m_01477 | Scaffold       | t3m_contig_70_382_len_18025_read_count_1393314.39                |           |
| 2572233121 | t3m_01477 | Coordinates    | 4420..5235(+)                                                    |           |
| 2572233121 | t3m_01477 | DNA_length     | 816bp                                                            |           |
| 2572233121 | t3m_01477 | Protein_length | 271aa                                                            |           |
| 2572233121 | t3m_01477 | GC             |                                                                  | 0.72      |
| 2572233122 | t3m_01478 | COG_category   | [O] Posttranslational modification, protein turnover, chaperones |           |
| 2572233122 | t3m_01478 | COG0484        | DnaJ-class molecular chaperone with C-terminal Zn finger domain  | 2.00E-104 |
| 2572233122 | t3m_01478 | pfam00684      | DnaJ_CXXCXGXXG                                                   | 9.30E-13  |
| 2572233122 | t3m_01478 | pfam01556      | CTDII                                                            | 7.40E-21  |
| 2572233122 | t3m_01478 | pfam00226      | DnaJ                                                             | 3.50E-26  |
| 2572233122 | t3m_01478 | TIGR02349      | chaperone protein DnaJ                                           | 3.50E-118 |
| 2572233122 | t3m_01478 | KO:K03686      | molecular chaperone DnaJ                                         | 0.00E+00  |
| 2572233122 | t3m_01478 | Locus_type     | CDS                                                              |           |
| 2572233122 | t3m_01478 | Product_name   | chaperone protein DnaJ                                           |           |
| 2572233122 | t3m_01478 | Scaffold       | t3m_contig_70_382_len_18025_read_count_1393314.39                |           |
| 2572233122 | t3m_01478 | Coordinates    | 5263..6411(+)                                                    |           |
| 2572233122 | t3m_01478 | DNA_length     | 1149bp                                                           |           |
| 2572233122 | t3m_01478 | Protein_length | 382aa                                                            |           |
| 2572233122 | t3m_01478 | GC             |                                                                  | 0.69      |
| 2572233123 | t3m_01479 | pfam05175      | MTS                                                              | 4.20E-40  |



|            |           |                |                                                                  |          |
|------------|-----------|----------------|------------------------------------------------------------------|----------|
| 2572233123 | t3m_01479 | ITERM:05207    | 16S rRNA m(2)G 1207 methyltransferase (EC 2.1.1.52)              |          |
| 2572233123 | t3m_01479 | Locus_type     | CDS                                                              |          |
| 2572233123 | t3m_01479 | Product_name   | 16S rRNA m(2)G 1207 methyltransferase (EC 2.1.1.52)              |          |
| 2572233123 | t3m_01479 | Scaffold       | t3m_contig_70_382_len_18025_read_count_1393314.39                |          |
| 2572233123 | t3m_01479 | Coordinates    | 6414..7055(+)                                                    |          |
| 2572233123 | t3m_01479 | DNA_length     | 642bp                                                            |          |
| 2572233123 | t3m_01479 | Protein_length | 213aa                                                            |          |
| 2572233123 | t3m_01479 | GC             |                                                                  | 0.7      |
|            |           |                |                                                                  |          |
| 2572233124 | t3m_01480 | KEGG_module    | M00178: Ribosome, bacteria                                       |          |
| 2572233124 | t3m_01480 | KEGG_module    | M00179: Ribosome, archaea                                        |          |
| 2572233124 | t3m_01480 | COG_category   | [J] Translation, ribosomal structure and biogenesis              |          |
| 2572233124 | t3m_01480 | COG0099        | Ribosomal protein S13                                            | 8.00E-25 |
| 2572233124 | t3m_01480 | pfam00416      | Ribosomal_S13                                                    | 5.40E-25 |
| 2572233124 | t3m_01480 | KO:K02952      | small subunit ribosomal protein S13                              | 0.00E+00 |
| 2572233124 | t3m_01480 | Locus_type     | CDS                                                              |          |
| 2572233124 | t3m_01480 | Product_name   | Ribosomal protein S13                                            |          |
| 2572233124 | t3m_01480 | Scaffold       | t3m_contig_70_382_len_18025_read_count_1393314.39                |          |
| 2572233124 | t3m_01480 | Coordinates    | 7211..7951(+)                                                    |          |
| 2572233124 | t3m_01480 | DNA_length     | 741bp                                                            |          |
| 2572233124 | t3m_01480 | Protein_length | 246aa                                                            |          |
| 2572233124 | t3m_01480 | GC             |                                                                  | 0.7      |
|            |           |                |                                                                  |          |
| 2572233125 | t3m_01481 | KEGG_module    | M00178: Ribosome, bacteria                                       |          |
| 2572233125 | t3m_01481 | KEGG_module    | M00179: Ribosome, archaea                                        |          |
| 2572233125 | t3m_01481 | COG_category   | [J] Translation, ribosomal structure and biogenesis              |          |
| 2572233125 | t3m_01481 | COG0522        | Ribosomal protein S4 and related proteins                        | 5.00E-26 |
| 2572233125 | t3m_01481 | pfam01479      | S4                                                               | 5.70E-08 |
| 2572233125 | t3m_01481 | TIGR01018      | ribosomal protein S4(archaeal type)/S9(eukaryote cytosolic type) | 1.20E-57 |
| 2572233125 | t3m_01481 | KO:K02986      | small subunit ribosomal protein S4                               | 0.00E+00 |
| 2572233125 | t3m_01481 | ITERM:00283    | SSU ribosomal protein S4P                                        |          |
| 2572233125 | t3m_01481 | Locus_type     | CDS                                                              |          |
| 2572233125 | t3m_01481 | Product_name   | SSU ribosomal protein S4P                                        |          |
| 2572233125 | t3m_01481 | Scaffold       | t3m_contig_70_382_len_18025_read_count_1393314.39                |          |

|            |           |                |                                                          |          |
|------------|-----------|----------------|----------------------------------------------------------|----------|
| 2572233125 | t3m_01481 | Coordinates    | 7962..8561(+)                                            |          |
| 2572233125 | t3m_01481 | DNA_length     | 600bp                                                    |          |
| 2572233125 | t3m_01481 | Protein_length | 199aa                                                    |          |
| 2572233125 | t3m_01481 | GC             |                                                          | 0.7      |
| 2572233126 | t3m_01482 | KEGG_module    | M00179: Ribosome, archaea                                |          |
| 2572233126 | t3m_01482 | KEGG_module    | M00178: Ribosome, bacteria                               |          |
| 2572233126 | t3m_01482 | COG_category   | [J] Translation, ribosomal structure and biogenesis      |          |
| 2572233126 | t3m_01482 | COG0100        | Ribosomal protein S11                                    | 5.00E-31 |
| 2572233126 | t3m_01482 | pfam00411      | Ribosomal_S11                                            | 9.50E-40 |
| 2572233126 | t3m_01482 | TIGR03628      | archaeal ribosomal protein S11P                          | 7.40E-62 |
| 2572233126 | t3m_01482 | KO:K02948      | small subunit ribosomal protein S11                      | 0.00E+00 |
| 2572233126 | t3m_01482 | Locus_type     | CDS                                                      |          |
| 2572233126 | t3m_01482 | Product_name   | SSU ribosomal protein S11P                               |          |
| 2572233126 | t3m_01482 | Scaffold       | t3m_contig_70_382_len_18025_read_count_1393314.39        |          |
| 2572233126 | t3m_01482 | Coordinates    | 8565..8948(+)                                            |          |
| 2572233126 | t3m_01482 | DNA_length     | 384bp                                                    |          |
| 2572233126 | t3m_01482 | Protein_length | 127aa                                                    |          |
| 2572233126 | t3m_01482 | GC             |                                                          | 0.71     |
| 2572233127 | t3m_01483 | KEGG_module    | M00184: RNA polymerase, archaea                          |          |
| 2572233127 | t3m_01483 | COG_category   | [K] Transcription                                        |          |
| 2572233127 | t3m_01483 | COG0202        | DNA-directed RNA polymerase, alpha subunit/40 kD subunit | 1.00E-23 |
| 2572233127 | t3m_01483 | pfam01193      | RNA_pol_L                                                | 5.10E-14 |
| 2572233127 | t3m_01483 | pfam01000      | RNA_pol_A_bac                                            | 5.10E-15 |
| 2572233127 | t3m_01483 | pfam00037      | Fer4                                                     | 1.10E-04 |
| 2572233127 | t3m_01483 | EC:2.7.7.6     | DNA-directed RNA polymerase.                             |          |
| 2572233127 | t3m_01483 | KO:K03047      | DNA-directed RNA polymerase subunit D [EC:2.7.7.6]       | 0.00E+00 |
| 2572233127 | t3m_01483 | Locus_type     | CDS                                                      |          |
| 2572233127 | t3m_01483 | Product_name   | DNA-directed RNA polymerase, alpha subunit/40 kD subunit |          |
| 2572233127 | t3m_01483 | Scaffold       | t3m_contig_70_382_len_18025_read_count_1393314.39        |          |
| 2572233127 | t3m_01483 | Coordinates    | 8952..9797(+)                                            |          |
| 2572233127 | t3m_01483 | DNA_length     | 846bp                                                    |          |
| 2572233127 | t3m_01483 | Protein_length | 281aa                                                    |          |

|            |           |                |                                                                  |          |
|------------|-----------|----------------|------------------------------------------------------------------|----------|
| 2572233127 | t3m_01483 | GC             |                                                                  | 0.68     |
| 2572233128 | t3m_01484 | COG_category   | [R] General function prediction only                             |          |
| 2572233128 | t3m_01484 | COG1537        | Predicted RNA-binding proteins                                   | 3.00E-55 |
| 2572233128 | t3m_01484 | pfam03463      | eRF1_1                                                           | 1.60E-19 |
| 2572233128 | t3m_01484 | pfam03465      | eRF1_3                                                           | 2.30E-08 |
| 2572233128 | t3m_01484 | pfam03464      | eRF1_2                                                           | 7.70E-12 |
| 2572233128 | t3m_01484 | TIGR00111      | mRNA surveillance protein pelota                                 | 1.50E-54 |
| 2572233128 | t3m_01484 | KO:K06965      | protein pelota                                                   | 0.00E+00 |
| 2572233128 | t3m_01484 | Locus_type     | CDS                                                              |          |
| 2572233128 | t3m_01484 | Product_name   | Predicted RNA-binding proteins                                   |          |
| 2572233128 | t3m_01484 | Scaffold       | t3m_contig_70_382_len_18025_read_count_1393314.39                |          |
| 2572233128 | t3m_01484 | Coordinates    | 9748..11019(-)                                                   |          |
| 2572233128 | t3m_01484 | DNA_length     | 1272bp                                                           |          |
| 2572233128 | t3m_01484 | Protein_length | 423aa                                                            |          |
| 2572233128 | t3m_01484 | GC             |                                                                  | 0.72     |
| 2572233129 | t3m_01485 | pfam05977      | MFS_3                                                            | 2.40E-15 |
| 2572233129 | t3m_01485 | Locus_type     | CDS                                                              |          |
| 2572233129 | t3m_01485 | Product_name   | Transmembrane secretion effector                                 |          |
| 2572233129 | t3m_01485 | Scaffold       | t3m_contig_70_382_len_18025_read_count_1393314.39                |          |
| 2572233129 | t3m_01485 | Coordinates    | 10937..12295(+)                                                  |          |
| 2572233129 | t3m_01485 | DNA_length     | 1359bp                                                           |          |
| 2572233129 | t3m_01485 | Protein_length | 452aa                                                            |          |
| 2572233129 | t3m_01485 | GC             |                                                                  | 0.69     |
| 2572233129 | t3m_01485 | Transmembrane  | Yes                                                              |          |
| 2572233130 | t3m_01486 | Metacyc        | PWY1G-0: mycothiol biosynthesis                                  |          |
| 2572233130 | t3m_01486 | COG_category   | [J] Translation, ribosomal structure and biogenesis              |          |
| 2572233130 | t3m_01486 | COG1670        | Acetyltransferases, including N-acetylases of ribosomal proteins | 6.00E-06 |
| 2572233130 | t3m_01486 | pfam00583      | Acetyltransf_1                                                   | 2.10E-13 |
| 2572233130 | t3m_01486 | EC:2.3.1.189   | Mycothiol synthase.                                              |          |
| 2572233130 | t3m_01486 | KO:K15520      | mycothiol synthase [EC:2.3.1.189]                                | 5.50E-14 |
| 2572233130 | t3m_01486 | Locus_type     | CDS                                                              |          |

|            |           |                |                                                                  |          |
|------------|-----------|----------------|------------------------------------------------------------------|----------|
| 2572233130 | t3m_01486 | Product_name   | Acetyltransferases, including N-acetylases of ribosomal proteins |          |
| 2572233130 | t3m_01486 | Scaffold       | t3m_contig_70_382_len_18025_read_count_1393314.39                |          |
| 2572233130 | t3m_01486 | Coordinates    | 12292..13233(-)                                                  |          |
| 2572233130 | t3m_01486 | DNA_length     | 942bp                                                            |          |
| 2572233130 | t3m_01486 | Protein_length | 313aa                                                            |          |
| 2572233130 | t3m_01486 | GC             |                                                                  | 0.71     |
|            |           |                |                                                                  |          |
| 2572233131 | t3m_01487 | KEGG_module    | M00377: Reductive acetyl-CoA pathway (Wood-Ljungdahl pathway)    |          |
| 2572233131 | t3m_01487 | KEGG_module    | M00140: C1-unit interconversion, prokaryotes                     |          |
| 2572233131 | t3m_01487 | Metacyc        | PWY-1722: formaldehyde oxidation V (tetrahydrofolate pathway)    |          |
| 2572233131 | t3m_01487 | Metacyc        | PWY-3841: folate transformations II                              |          |
| 2572233131 | t3m_01487 | Metacyc        | PWY-2201: folate transformations I                               |          |
| 2572233131 | t3m_01487 | Metacyc        | 1CMET2-PWY: formylTHF biosynthesis I                             |          |
| 2572233131 | t3m_01487 | Metacyc        | P164-PWY: purine nucleobases degradation I (anaerobic)           |          |
| 2572233131 | t3m_01487 | Metacyc        | CODH-PWY: reductive acetyl coenzyme A pathway                    |          |
| 2572233131 | t3m_01487 | Metacyc        | PWY-2161: folate polyglutamylation                               |          |
| 2572233131 | t3m_01487 | Metacyc        | PWY-5497: purine nucleobases degradation II (anaerobic)          |          |
| 2572233131 | t3m_01487 | IMG_pathway    | 1030: 10-formyltetrahydrofolate polyglutamination                |          |
| 2572233131 | t3m_01487 | IMG_pathway    | 482: Generation of ATP from formimino-THF                        |          |
| 2572233131 | t3m_01487 | IMG_pathway    | 942: Wood-Ljungdahl pathway                                      |          |
| 2572233131 | t3m_01487 | IMG_pathway    | 958: Conversion of formate to methylenetetrahydrofolate          |          |
| 2572233131 | t3m_01487 | COG_category   | [F] Nucleotide transport and metabolism                          |          |
| 2572233131 | t3m_01487 | COG2759        | Formyltetrahydrofolate synthetase                                | 0.00E+00 |
| 2572233131 | t3m_01487 | pfam01268      | FTHFS                                                            | 0.00E+00 |
| 2572233131 | t3m_01487 | EC:6.3.4.3     | Formate--tetrahydrofolate ligase.                                |          |
| 2572233131 | t3m_01487 | KO:K01938      | formate--tetrahydrofolate ligase [EC:6.3.4.3]                    | 0.00E+00 |
| 2572233131 | t3m_01487 | ITERM:01840    | Formate-tetrahydrofolate ligase (EC 6.3.4.3)                     |          |
| 2572233131 | t3m_01487 | Locus_type     | CDS                                                              |          |
| 2572233131 | t3m_01487 | Product_name   | Formate-tetrahydrofolate ligase (EC 6.3.4.3)                     |          |
| 2572233131 | t3m_01487 | Scaffold       | t3m_contig_70_382_len_18025_read_count_1393314.39                |          |
| 2572233131 | t3m_01487 | Coordinates    | 13290..14978(+)                                                  |          |
| 2572233131 | t3m_01487 | DNA_length     | 1689bp                                                           |          |
| 2572233131 | t3m_01487 | Protein_length | 562aa                                                            |          |
| 2572233131 | t3m_01487 | GC             |                                                                  | 0.68     |

|            |           |                |                                                                |                                                   |          |
|------------|-----------|----------------|----------------------------------------------------------------|---------------------------------------------------|----------|
| 2572233132 | t3m_01488 | Locus_type     |                                                                | CDS                                               |          |
| 2572233132 | t3m_01488 | Product_name   |                                                                | hypothetical protein                              |          |
| 2572233132 | t3m_01488 | Scaffold       |                                                                | t3m_contig_70_382_len_18025_read_count_1393314.39 |          |
| 2572233132 | t3m_01488 | Coordinates    |                                                                | 15068..15358(+)                                   |          |
| 2572233132 | t3m_01488 | DNA_length     |                                                                | 291bp                                             |          |
| 2572233132 | t3m_01488 | Protein_length |                                                                | 96aa                                              |          |
| 2572233132 | t3m_01488 | GC             |                                                                |                                                   | 0.71     |
| 2572233133 | t3m_01489 | pfam01402      | RHH_1                                                          |                                                   | 1.80E-04 |
| 2572233133 | t3m_01489 | Locus_type     |                                                                | CDS                                               |          |
| 2572233133 | t3m_01489 | Product_name   |                                                                | Ribbon-helix-helix protein, copG family           |          |
| 2572233133 | t3m_01489 | Scaffold       |                                                                | t3m_contig_70_382_len_18025_read_count_1393314.39 |          |
| 2572233133 | t3m_01489 | Coordinates    |                                                                | 15521..15886(+)                                   |          |
| 2572233133 | t3m_01489 | DNA_length     |                                                                | 366bp                                             |          |
| 2572233133 | t3m_01489 | Protein_length |                                                                | 121aa                                             |          |
| 2572233133 | t3m_01489 | GC             |                                                                |                                                   | 0.66     |
| 2572233134 | t3m_01490 | COG_category   | [D] Cell cycle control, cell division, chromosome partitioning |                                                   |          |
| 2572233134 | t3m_01490 | COG0206        | Cell division GTPase                                           |                                                   | 6.00E-44 |
| 2572233134 | t3m_01490 | pfam12327      | FtsZ_C                                                         |                                                   | 5.80E-11 |
| 2572233134 | t3m_01490 | pfam00091      | Tubulin                                                        |                                                   | 4.40E-19 |
| 2572233134 | t3m_01490 | KO:K03531      | cell division protein FtsZ                                     |                                                   | 0.00E+00 |
| 2572233134 | t3m_01490 | Locus_type     |                                                                | CDS                                               |          |
| 2572233134 | t3m_01490 | Product_name   |                                                                | Cell division GTPase                              |          |
| 2572233134 | t3m_01490 | Scaffold       |                                                                | t3m_contig_70_382_len_18025_read_count_1393314.39 |          |
| 2572233134 | t3m_01490 | Coordinates    |                                                                | 15902..16936(+)                                   |          |
| 2572233134 | t3m_01490 | DNA_length     |                                                                | 1035bp                                            |          |
| 2572233134 | t3m_01490 | Protein_length |                                                                | 344aa                                             |          |
| 2572233134 | t3m_01490 | GC             |                                                                |                                                   | 0.69     |
| 2572233135 | t3m_01491 | COG_category   | [S] Function unknown                                           |                                                   |          |
| 2572233135 | t3m_01491 | COG1901        | Uncharacterized conserved protein                              |                                                   | 2.00E-33 |
| 2572233135 | t3m_01491 | pfam04013      | Methyltrn_RNA_2                                                |                                                   | 2.00E-36 |

|            |           |                |                                                            |          |
|------------|-----------|----------------|------------------------------------------------------------|----------|
| 2572233135 | t3m_01491 | EC:2.1.1.257   | tRNA (pseudouridine(54)-N(1))-methyltransferase.           |          |
| 2572233135 | t3m_01491 | KO:K16317      | tRNA (pseudouridine54-N1)-methyltransferase [EC:2.1.1.257] | 5.60E-32 |
| 2572233135 | t3m_01491 | Locus_type     | CDS                                                        |          |
| 2572233135 | t3m_01491 | Product_name   | Uncharacterized conserved protein                          |          |
| 2572233135 | t3m_01491 | Scaffold       | t3m_contig_70_382_len_18025_read_count_1393314.39          |          |
| 2572233135 | t3m_01491 | Coordinates    | 16937..17566(-)                                            |          |
| 2572233135 | t3m_01491 | DNA_length     | 630bp                                                      |          |
| 2572233135 | t3m_01491 | Protein_length | 209aa                                                      |          |
| 2572233135 | t3m_01491 | GC             |                                                            | 0.71     |
| 2572233136 | t3m_01492 | Locus_type     | CDS                                                        |          |
| 2572233136 | t3m_01492 | Product_name   | hypothetical protein                                       |          |
| 2572233136 | t3m_01492 | Scaffold       | t3m_contig_70_382_len_18025_read_count_1393314.39          |          |
| 2572233136 | t3m_01492 | Coordinates    | 17624..18022(-)                                            |          |
| 2572233136 | t3m_01492 | DNA_length     | 399bp                                                      |          |
| 2572233136 | t3m_01492 | Protein_length | 132aa                                                      |          |
| 2572233136 | t3m_01492 | GC             |                                                            | 0.67     |
| 2572233137 | t3m_01493 | Locus_type     | CDS                                                        |          |
| 2572233137 | t3m_01493 | Product_name   | hypothetical protein                                       |          |
| 2572233137 | t3m_01493 | Scaffold       | t3m_contig_70_392_len_17666_read_count_1526455.40          |          |
| 2572233137 | t3m_01493 | Coordinates    | 195..404(+)                                                |          |
| 2572233137 | t3m_01493 | DNA_length     | 210bp                                                      |          |
| 2572233137 | t3m_01493 | Protein_length | 69aa                                                       |          |
| 2572233137 | t3m_01493 | GC             |                                                            | 0.65     |
| 2572233137 | t3m_01493 | Transmembrane  | Yes                                                        |          |
| 2572233138 | t3m_01494 | KEGG_module    | M00359: Aminoacyl-tRNA biosynthesis, eukaryotes            |          |
| 2572233138 | t3m_01494 | KEGG_module    | M00360: Aminoacyl-tRNA biosynthesis, prokaryotes           |          |
| 2572233138 | t3m_01494 | Metacyc        | TRNA-CHARGING-PWY: tRNA charging                           |          |
| 2572233138 | t3m_01494 | IMG_pathway    | 500: L-proline ligation to tRNA(Pro)                       |          |
| 2572233138 | t3m_01494 | COG_category   | [J] Translation, ribosomal structure and biogenesis        |          |
| 2572233138 | t3m_01494 | COG0442        | Prolyl-tRNA synthetase                                     | 1.00E-98 |
| 2572233138 | t3m_01494 | pfam03129      | HGTP_anticodon                                             | 6.20E-13 |

|            |           |                |                                                   |          |
|------------|-----------|----------------|---------------------------------------------------|----------|
| 2572233138 | t3m_01494 | pfam00587      | tRNA-synt_2b                                      | 1.20E-14 |
| 2572233138 | t3m_01494 | EC:6.1.1.15    | Proline--tRNA ligase.                             |          |
| 2572233138 | t3m_01494 | TIGR00408      | prolyl-tRNA synthetase, family I                  | 0.00E+00 |
| 2572233138 | t3m_01494 | KO:K01881      | prolyl-tRNA synthetase [EC:6.1.1.15]              | 0.00E+00 |
| 2572233138 | t3m_01494 | ITERM:01944    | prolyl-tRNA synthetase (EC 6.1.1.15)              |          |
| 2572233138 | t3m_01494 | Locus_type     | CDS                                               |          |
| 2572233138 | t3m_01494 | Product_name   | prolyl-tRNA synthetase (EC 6.1.1.15)              |          |
| 2572233138 | t3m_01494 | Scaffold       | t3m_contig_70_392_len_17666_read_count_1526455.40 |          |
| 2572233138 | t3m_01494 | Coordinates    | 419..1846(-)                                      |          |
| 2572233138 | t3m_01494 | DNA_length     | 1428bp                                            |          |
| 2572233138 | t3m_01494 | Protein_length | 475aa                                             |          |
| 2572233138 | t3m_01494 | GC             |                                                   | 0.69     |
| 2572233139 | t3m_01495 | COG_category   | [S] Function unknown                              |          |
| 2572233139 | t3m_01495 | COG2237        | Predicted membrane protein                        | 1.00E-55 |
| 2572233139 | t3m_01495 | pfam04123      | DUF373                                            | 1.60E-84 |
| 2572233139 | t3m_01495 | KO:K08975      | putative membrane protein                         | 0.00E+00 |
| 2572233139 | t3m_01495 | Locus_type     | CDS                                               |          |
| 2572233139 | t3m_01495 | Product_name   | Predicted membrane protein                        |          |
| 2572233139 | t3m_01495 | Scaffold       | t3m_contig_70_392_len_17666_read_count_1526455.40 |          |
| 2572233139 | t3m_01495 | Coordinates    | 2031..3116(+)                                     |          |
| 2572233139 | t3m_01495 | DNA_length     | 1086bp                                            |          |
| 2572233139 | t3m_01495 | Protein_length | 361aa                                             |          |
| 2572233139 | t3m_01495 | GC             |                                                   | 0.67     |
| 2572233139 | t3m_01495 | Transmembrane  | Yes                                               |          |
| 2572233140 | t3m_01496 | COG_category   | [R] General function prediction only              |          |
| 2572233140 | t3m_01496 | COG2236        | Predicted phosphoribosyltransferases              | 1.00E-36 |
| 2572233140 | t3m_01496 | pfam00156      | Pribosyltran                                      | 4.60E-15 |
| 2572233140 | t3m_01496 | Locus_type     | CDS                                               |          |
| 2572233140 | t3m_01496 | Product_name   | Predicted phosphoribosyltransferases              |          |
| 2572233140 | t3m_01496 | Scaffold       | t3m_contig_70_392_len_17666_read_count_1526455.40 |          |
| 2572233140 | t3m_01496 | Coordinates    | 3141..3755(-)                                     |          |
| 2572233140 | t3m_01496 | DNA_length     | 615bp                                             |          |

|            |           |                |                                                              |          |
|------------|-----------|----------------|--------------------------------------------------------------|----------|
| 2572233140 | t3m_01496 | Protein_length | 204aa                                                        |          |
| 2572233140 | t3m_01496 | GC             |                                                              | 0.7      |
| 2572233141 | t3m_01497 | Metacyc        | GLUTAMATE-SYN2-PWY: glutamate biosynthesis II                |          |
| 2572233141 | t3m_01497 | Metacyc        | ARGININE-SYN4-PWY: arginine biosynthesis IV                  |          |
| 2572233141 | t3m_01497 | Metacyc        | PWY-5766: glutamate degradation X                            |          |
| 2572233141 | t3m_01497 | COG_category   | [E] Amino acid transport and metabolism                      |          |
| 2572233141 | t3m_01497 | COG0334        | Glutamate dehydrogenase/leucine dehydrogenase                | 0.00E+00 |
| 2572233141 | t3m_01497 | pfam02812      | ELFV_dehydrog_N                                              | 2.90E-53 |
| 2572233141 | t3m_01497 | pfam00208      | ELFV_dehydrog                                                | 5.30E-68 |
| 2572233141 | t3m_01497 | EC:1.4.1.3     | Glutamate dehydrogenase (NAD(P)(+)).                         |          |
| 2572233141 | t3m_01497 | KO:K00261      | glutamate dehydrogenase (NAD(P)+) [EC:1.4.1.3]               | 0.00E+00 |
| 2572233141 | t3m_01497 | Locus_type     | CDS                                                          |          |
| 2572233141 | t3m_01497 | Product_name   | Glutamate dehydrogenase/leucine dehydrogenase                |          |
| 2572233141 | t3m_01497 | Scaffold       | t3m_contig_70_392_len_17666_read_count_1526455.40            |          |
| 2572233141 | t3m_01497 | Coordinates    | 3801..4973(-)                                                |          |
| 2572233141 | t3m_01497 | DNA_length     | 1173bp                                                       |          |
| 2572233141 | t3m_01497 | Protein_length | 390aa                                                        |          |
| 2572233141 | t3m_01497 | GC             |                                                              | 0.66     |
| 2572233142 | t3m_01498 | KEGG_module    | M00127: Thiamine biosynthesis, AIR => thiamine-P/thiamine-2P |          |
| 2572233142 | t3m_01498 | Metacyc        | PWY-6896: thiamin salvage I                                  |          |
| 2572233142 | t3m_01498 | Metacyc        | PWY-6893: thiamin diphosphate biosynthesis II (Bacillus)     |          |
| 2572233142 | t3m_01498 | Metacyc        | PWY-6894: thiamin diphosphate biosynthesis I (E. coli)       |          |
| 2572233142 | t3m_01498 | Metacyc        | PWY-6897: thiamin salvage II                                 |          |
| 2572233142 | t3m_01498 | COG_category   | [H] Coenzyme transport and metabolism                        |          |
| 2572233142 | t3m_01498 | COG0611        | Thiamine monophosphate kinase                                | 2.00E-55 |
| 2572233142 | t3m_01498 | pfam02769      | AIRS_C                                                       | 5.00E-09 |
| 2572233142 | t3m_01498 | pfam00586      | AIRS                                                         | 6.80E-22 |
| 2572233142 | t3m_01498 | EC:2.7.4.16    | Thiamine-phosphate kinase.                                   |          |
| 2572233142 | t3m_01498 | TIGR01379      | thiamine-monophosphate kinase                                | 4.20E-75 |
| 2572233142 | t3m_01498 | KO:K00946      | thiamine-monophosphate kinase [EC:2.7.4.16]                  | 1.60E-40 |
| 2572233142 | t3m_01498 | Locus_type     | CDS                                                          |          |
| 2572233142 | t3m_01498 | Product_name   | thiamine-monophosphate kinase                                |          |



|            |           |                |                                                                            |          |
|------------|-----------|----------------|----------------------------------------------------------------------------|----------|
| 2572233142 | t3m_01498 | Scaffold       | t3m_contig_70_392_len_17666_read_count_1526455.40                          |          |
| 2572233142 | t3m_01498 | Coordinates    | 5188..6192(-)                                                              |          |
| 2572233142 | t3m_01498 | DNA_length     | 1005bp                                                                     |          |
| 2572233142 | t3m_01498 | Protein_length | 334aa                                                                      |          |
| 2572233142 | t3m_01498 | GC             |                                                                            | 0.73     |
| 2572233143 | t3m_01499 | KEGG_module    | M00087: beta-Oxidation                                                     |          |
| 2572233143 | t3m_01499 | KEGG_module    | M00036: Leucine degradation, leucine => acetoacetate + acetyl-CoA          |          |
| 2572233143 | t3m_01499 | KEGG_module    | M00013: Malonate semialdehyde pathway, propanoyl-CoA => Acetyl-CoA         |          |
| 2572233143 | t3m_01499 | Metacyc        | PWY-7094: fatty acid salvage                                               |          |
| 2572233143 | t3m_01499 | COG_category   | [I] Lipid transport and metabolism                                         |          |
| 2572233143 | t3m_01499 | COG1960        | Acyl-CoA dehydrogenases                                                    | 2.00E-62 |
| 2572233143 | t3m_01499 | pfam00441      | Acyl-CoA_dh_1                                                              | 1.90E-31 |
| 2572233143 | t3m_01499 | pfam02771      | Acyl-CoA_dh_N                                                              | 1.00E-25 |
| 2572233143 | t3m_01499 | pfam02770      | Acyl-CoA_dh_M                                                              | 6.80E-14 |
| 2572233143 | t3m_01499 | EC:1.3.8.7     | Medium-chain acyl-CoA dehydrogenase.                                       |          |
| 2572233143 | t3m_01499 | KO:K00249      | acyl-CoA dehydrogenase [EC:1.3.8.7]                                        | 0.00E+00 |
| 2572233143 | t3m_01499 | Locus_type     | CDS                                                                        |          |
| 2572233143 | t3m_01499 | Product_name   | Acyl-CoA dehydrogenases                                                    |          |
| 2572233143 | t3m_01499 | Scaffold       | t3m_contig_70_392_len_17666_read_count_1526455.40                          |          |
| 2572233143 | t3m_01499 | Coordinates    | 6200..7390(-)                                                              |          |
| 2572233143 | t3m_01499 | DNA_length     | 1191bp                                                                     |          |
| 2572233143 | t3m_01499 | Protein_length | 396aa                                                                      |          |
| 2572233143 | t3m_01499 | GC             |                                                                            | 0.66     |
| 2572233144 | t3m_01500 | KEGG_module    | M00001: Glycolysis (Embden-Meyerhof pathway), glucose => pyruvate          |          |
| 2572233144 | t3m_01500 | KEGG_module    | M00166: Reductive pentose phosphate cycle, RuBP + CO2 => glyceraldehyde-3P |          |
| 2572233144 | t3m_01500 | KEGG_module    | M00165: Reductive pentose phosphate cycle (Calvin cycle)                   |          |
| 2572233144 | t3m_01500 | KEGG_module    | M00002: Glycolysis, core module involving three-carbon compounds           |          |
| 2572233144 | t3m_01500 | IMG_pathway    | 336: Standard Embden-Meyerhof pathway                                      |          |
| 2572233144 | t3m_01500 | IMG_pathway    | 359: Conversion of glyceraldehyde-3-phosphate to pyruvate                  |          |
| 2572233144 | t3m_01500 | IMG_pathway    | 527: Calvin cycle                                                          |          |
| 2572233144 | t3m_01500 | COG_category   | [G] Carbohydrate transport and metabolism                                  |          |
| 2572233144 | t3m_01500 | COG0057        | Glyceraldehyde-3-phosphate dehydrogenase/erythrose-4-phosphate de          | 7.00E-54 |

|            |           |                |                                                                         |           |
|------------|-----------|----------------|-------------------------------------------------------------------------|-----------|
| 2572233144 | t3m_01500 | pfam02800      | Gp_dh_C                                                                 | 5.90E-13  |
| 2572233144 | t3m_01500 | pfam00044      | Gp_dh_N                                                                 | 1.20E-18  |
| 2572233144 | t3m_01500 | EC:1.2.1.59    | Glyceraldehyde-3-phosphate dehydrogenase (NAD(P)(+)) (phosphorylating). |           |
| 2572233144 | t3m_01500 | TIGR01546      | glyceraldehyde-3-phosphate dehydrogenase, type II                       | 7.40E-123 |
| 2572233144 | t3m_01500 | KO:K00150      | glyceraldehyde-3-phosphate dehydrogenase (NAD(P)) [EC:1.2.1.59]         | 0.00E+00  |
| 2572233144 | t3m_01500 | ITERM:07087    | glyceraldehyde 3-phosphate dehydrogenase (NAD(P)+) (EC 1.2.1.59)        |           |
| 2572233144 | t3m_01500 | Locus_type     | CDS                                                                     |           |
| 2572233144 | t3m_01500 | Product_name   | glyceraldehyde 3-phosphate dehydrogenase (NAD(P)+) (EC 1.2.1.59)        |           |
| 2572233144 | t3m_01500 | Scaffold       | t3m_contig_70_392_len_17666_read_count_1526455.40                       |           |
| 2572233144 | t3m_01500 | Coordinates    | 7500..8522(+)                                                           |           |
| 2572233144 | t3m_01500 | DNA_length     | 1023bp                                                                  |           |
| 2572233144 | t3m_01500 | Protein_length | 340aa                                                                   |           |
| 2572233144 | t3m_01500 | GC             |                                                                         | 0.67      |
|            |           |                |                                                                         |           |
| 2572233145 | t3m_01501 | pfam08241      | Methyltransf_11                                                         | 3.90E-12  |
| 2572233145 | t3m_01501 | Locus_type     | CDS                                                                     |           |
| 2572233145 | t3m_01501 | Product_name   | Methyltransferase domain                                                |           |
| 2572233145 | t3m_01501 | Scaffold       | t3m_contig_70_392_len_17666_read_count_1526455.40                       |           |
| 2572233145 | t3m_01501 | Coordinates    | 8615..9514(+)                                                           |           |
| 2572233145 | t3m_01501 | DNA_length     | 900bp                                                                   |           |
| 2572233145 | t3m_01501 | Protein_length | 299aa                                                                   |           |
| 2572233145 | t3m_01501 | GC             |                                                                         | 0.7       |
|            |           |                |                                                                         |           |
| 2572233146 | t3m_01502 | KEGG_module    | M00184: RNA polymerase, archaea                                         |           |
| 2572233146 | t3m_01502 | COG_category   | [K] Transcription                                                       |           |
| 2572233146 | t3m_01502 | COG1095        | DNA-directed RNA polymerase, subunit E'                                 | 3.00E-57  |
| 2572233146 | t3m_01502 | pfam00575      | S1                                                                      | 5.70E-11  |
| 2572233146 | t3m_01502 | pfam03876      | SHS2_Rpb7-N                                                             | 9.40E-14  |
| 2572233146 | t3m_01502 | EC:2.7.7.6     | DNA-directed RNA polymerase.                                            |           |
| 2572233146 | t3m_01502 | TIGR00448      | DNA-directed RNA polymerase (rpoE), archaeal and eukaryotic form        | 2.30E-66  |
| 2572233146 | t3m_01502 | KO:K03049      | DNA-directed RNA polymerase subunit E' [EC:2.7.7.6]                     | 0.00E+00  |
| 2572233146 | t3m_01502 | Locus_type     | CDS                                                                     |           |
| 2572233146 | t3m_01502 | Product_name   | DNA-directed RNA polymerase, subunit E' (EC 2.7.7.6)                    |           |
| 2572233146 | t3m_01502 | Scaffold       | t3m_contig_70_392_len_17666_read_count_1526455.40                       |           |

|            |           |                |                                                      |          |
|------------|-----------|----------------|------------------------------------------------------|----------|
| 2572233146 | t3m_01502 | Coordinates    | 9555..10214(+)                                       |          |
| 2572233146 | t3m_01502 | DNA_length     | 660bp                                                |          |
| 2572233146 | t3m_01502 | Protein_length | 219aa                                                |          |
| 2572233146 | t3m_01502 | GC             |                                                      | 0.68     |
| 2572233147 | t3m_01503 | KEGG_module    | M00184: RNA polymerase, archaea                      |          |
| 2572233147 | t3m_01503 | COG_category   | [K] Transcription                                    |          |
| 2572233147 | t3m_01503 | COG2093        | DNA-directed RNA polymerase, subunit E"              | 3.00E-14 |
| 2572233147 | t3m_01503 | pfam06093      | Spt4                                                 | 3.10E-12 |
| 2572233147 | t3m_01503 | EC:2.7.7.6     | DNA-directed RNA polymerase.                         |          |
| 2572233147 | t3m_01503 | KO:K03050      | DNA-directed RNA polymerase subunit E" [EC:2.7.7.6]  | 8.40E-13 |
| 2572233147 | t3m_01503 | Locus_type     | CDS                                                  |          |
| 2572233147 | t3m_01503 | Product_name   | DNA-directed RNA polymerase, subunit E" (EC 2.7.7.6) |          |
| 2572233147 | t3m_01503 | Scaffold       | t3m_contig_70_392_len_17666_read_count_1526455.40    |          |
| 2572233147 | t3m_01503 | Coordinates    | 10223..10408(+)                                      |          |
| 2572233147 | t3m_01503 | DNA_length     | 186bp                                                |          |
| 2572233147 | t3m_01503 | Protein_length | 61aa                                                 |          |
| 2572233147 | t3m_01503 | GC             |                                                      | 0.65     |
| 2572233148 | t3m_01504 | COG_category   | [S] Function unknown                                 |          |
| 2572233148 | t3m_01504 | COG1909        | Uncharacterized protein conserved in archaea         | 6.00E-26 |
| 2572233148 | t3m_01504 | pfam04019      | DUF359                                               | 1.30E-26 |
| 2572233148 | t3m_01504 | KO:K09735      | hypothetical protein                                 | 9.40E-16 |
| 2572233148 | t3m_01504 | Locus_type     | CDS                                                  |          |
| 2572233148 | t3m_01504 | Product_name   | Uncharacterized protein conserved in archaea         |          |
| 2572233148 | t3m_01504 | Scaffold       | t3m_contig_70_392_len_17666_read_count_1526455.40    |          |
| 2572233148 | t3m_01504 | Coordinates    | 10455..10931(+)                                      |          |
| 2572233148 | t3m_01504 | DNA_length     | 477bp                                                |          |
| 2572233148 | t3m_01504 | Protein_length | 158aa                                                |          |
| 2572233148 | t3m_01504 | GC             |                                                      | 0.67     |
| 2572233149 | t3m_01505 | KEGG_module    | M00177: Ribosome, eukaryotes                         |          |
| 2572233149 | t3m_01505 | KEGG_module    | M00179: Ribosome, archaea                            |          |
| 2572233149 | t3m_01505 | COG_category   | [J] Translation, ribosomal structure and biogenesis  |          |

|            |           |                |                                                     |          |
|------------|-----------|----------------|-----------------------------------------------------|----------|
| 2572233149 | t3m_01505 | COG2004        | Ribosomal protein S24E                              | 2.00E-17 |
| 2572233149 | t3m_01505 | pfam01282      | Ribosomal_S24e                                      | 3.70E-20 |
| 2572233149 | t3m_01505 | KO:K02974      | small subunit ribosomal protein S24e                | 1.10E-17 |
| 2572233149 | t3m_01505 | Locus_type     | CDS                                                 |          |
| 2572233149 | t3m_01505 | Product_name   | Ribosomal protein S24E                              |          |
| 2572233149 | t3m_01505 | Scaffold       | t3m_contig_70_392_len_17666_read_count_1526455.40   |          |
| 2572233149 | t3m_01505 | Coordinates    | 10921..11310(+)                                     |          |
| 2572233149 | t3m_01505 | DNA_length     | 390bp                                               |          |
| 2572233149 | t3m_01505 | Protein_length | 129aa                                               |          |
| 2572233149 | t3m_01505 | GC             |                                                     | 0.73     |
| 2572233150 | t3m_01506 | KEGG_module    | M00177: Ribosome, eukaryotes                        |          |
| 2572233150 | t3m_01506 | KEGG_module    | M00179: Ribosome, archaea                           |          |
| 2572233150 | t3m_01506 | COG_category   | [J] Translation, ribosomal structure and biogenesis |          |
| 2572233150 | t3m_01506 | COG1998        | Ribosomal protein S27AE                             | 4.00E-12 |
| 2572233150 | t3m_01506 | pfam01599      | Ribosomal_S27                                       | 2.60E-17 |
| 2572233150 | t3m_01506 | KO:K02977      | small subunit ribosomal protein S27Ae               | 1.90E-12 |
| 2572233150 | t3m_01506 | Locus_type     | CDS                                                 |          |
| 2572233150 | t3m_01506 | Product_name   | Ribosomal protein S27AE                             |          |
| 2572233150 | t3m_01506 | Scaffold       | t3m_contig_70_392_len_17666_read_count_1526455.40   |          |
| 2572233150 | t3m_01506 | Coordinates    | 11317..11508(+)                                     |          |
| 2572233150 | t3m_01506 | DNA_length     | 192bp                                               |          |
| 2572233150 | t3m_01506 | Protein_length | 63aa                                                |          |
| 2572233150 | t3m_01506 | GC             |                                                     | 0.66     |
| 2572233151 | t3m_01507 | pfam00535      | Glycos_transf_2                                     | 2.30E-06 |
| 2572233151 | t3m_01507 | Locus_type     | CDS                                                 |          |
| 2572233151 | t3m_01507 | Product_name   | Glycosyl transferase family 2                       |          |
| 2572233151 | t3m_01507 | Scaffold       | t3m_contig_70_392_len_17666_read_count_1526455.40   |          |
| 2572233151 | t3m_01507 | Coordinates    | 11590..12183(-)                                     |          |
| 2572233151 | t3m_01507 | DNA_length     | 594bp                                               |          |
| 2572233151 | t3m_01507 | Protein_length | 197aa                                               |          |
| 2572233151 | t3m_01507 | GC             |                                                     | 0.64     |

|            |           |                |                                                                  |          |
|------------|-----------|----------------|------------------------------------------------------------------|----------|
| 2572233152 | t3m_01508 | Locus_type     | tRNA                                                             |          |
| 2572233152 | t3m_01508 | Product_name   | tRNA_Arg_CCG                                                     |          |
| 2572233152 | t3m_01508 | Scaffold       | t3m_contig_70_392_len_17666_read_count_1526455.40                |          |
| 2572233152 | t3m_01508 | Coordinates    | 12443..12516(+)                                                  |          |
| 2572233152 | t3m_01508 | DNA_length     | 74bp                                                             |          |
| 2572233152 | t3m_01508 | GC             |                                                                  | 0.66     |
|            |           |                |                                                                  |          |
| 2572233153 | t3m_01509 | COG_category   | [S] Function unknown                                             |          |
| 2572233153 | t3m_01509 | COG3388        | Uncharacterized protein conserved in archaea                     | 6.00E-14 |
| 2572233153 | t3m_01509 | Locus_type     | CDS                                                              |          |
| 2572233153 | t3m_01509 | Product_name   | Uncharacterized protein conserved in archaea                     |          |
| 2572233153 | t3m_01509 | Scaffold       | t3m_contig_70_392_len_17666_read_count_1526455.40                |          |
| 2572233153 | t3m_01509 | Coordinates    | 12602..13000(+)                                                  |          |
| 2572233153 | t3m_01509 | DNA_length     | 399bp                                                            |          |
| 2572233153 | t3m_01509 | Protein_length | 132aa                                                            |          |
| 2572233153 | t3m_01509 | GC             |                                                                  | 0.64     |
|            |           |                |                                                                  |          |
| 2572233154 | t3m_01510 | Locus_type     | tRNA                                                             |          |
| 2572233154 | t3m_01510 | Product_name   | tRNA_Pseudo_GTT                                                  |          |
| 2572233154 | t3m_01510 | Scaffold       | t3m_contig_70_392_len_17666_read_count_1526455.40                |          |
| 2572233154 | t3m_01510 | Coordinates    | 13027..13096(+)                                                  |          |
| 2572233154 | t3m_01510 | DNA_length     | 70bp                                                             |          |
| 2572233154 | t3m_01510 | GC             |                                                                  | 0.64     |
|            |           |                |                                                                  |          |
| 2572233155 | t3m_01511 | Locus_type     | tRNA                                                             |          |
| 2572233155 | t3m_01511 | Product_name   | tRNA_Met_CAT                                                     |          |
| 2572233155 | t3m_01511 | Scaffold       | t3m_contig_70_392_len_17666_read_count_1526455.40                |          |
| 2572233155 | t3m_01511 | Coordinates    | 13150..13225(+)                                                  |          |
| 2572233155 | t3m_01511 | DNA_length     | 76bp                                                             |          |
| 2572233155 | t3m_01511 | GC             |                                                                  | 0.66     |
|            |           |                |                                                                  |          |
| 2572233156 | t3m_01512 | COG_category   | [J] Translation, ribosomal structure and biogenesis              |          |
| 2572233156 | t3m_01512 | COG1670        | Acetyltransferases, including N-acetylases of ribosomal proteins | 3.00E-05 |
| 2572233156 | t3m_01512 | pfam00583      | Acetyltransf_1                                                   | 4.30E-09 |

|            |           |                |                                                |                                                                  |          |
|------------|-----------|----------------|------------------------------------------------|------------------------------------------------------------------|----------|
| 2572233156 | t3m_01512 | Locus_type     |                                                | CDS                                                              |          |
| 2572233156 | t3m_01512 | Product_name   |                                                | Acetyltransferases, including N-acetylases of ribosomal proteins |          |
| 2572233156 | t3m_01512 | Scaffold       |                                                | t3m_contig_70_392_len_17666_read_count_1526455.40                |          |
| 2572233156 | t3m_01512 | Coordinates    |                                                | 13259..13828(+)                                                  |          |
| 2572233156 | t3m_01512 | DNA_length     |                                                | 570bp                                                            |          |
| 2572233156 | t3m_01512 | Protein_length |                                                | 189aa                                                            |          |
| 2572233156 | t3m_01512 | GC             |                                                |                                                                  | 0.66     |
| 2572233157 | t3m_01513 | pfam01521      | Fe-S_biosyn                                    |                                                                  | 1.30E-05 |
| 2572233157 | t3m_01513 | Locus_type     |                                                | CDS                                                              |          |
| 2572233157 | t3m_01513 | Product_name   |                                                | Iron-sulphur cluster biosynthesis                                |          |
| 2572233157 | t3m_01513 | Scaffold       |                                                | t3m_contig_70_392_len_17666_read_count_1526455.40                |          |
| 2572233157 | t3m_01513 | Coordinates    |                                                | 13825..14061(-)                                                  |          |
| 2572233157 | t3m_01513 | DNA_length     |                                                | 237bp                                                            |          |
| 2572233157 | t3m_01513 | Protein_length |                                                | 78aa                                                             |          |
| 2572233157 | t3m_01513 | GC             |                                                |                                                                  | 0.68     |
| 2572233158 | t3m_01514 | COG_category   | [S] Function unknown                           |                                                                  |          |
| 2572233158 | t3m_01514 | COG0316        | Uncharacterized conserved protein              |                                                                  | 2.00E-31 |
| 2572233158 | t3m_01514 | pfam01521      | Fe-S_biosyn                                    |                                                                  | 1.70E-17 |
| 2572233158 | t3m_01514 | TIGR00049      | Iron-sulfur cluster assembly accessory protein |                                                                  | 1.00E-37 |
| 2572233158 | t3m_01514 | KO:K13628      | iron-sulfur cluster assembly protein           |                                                                  | 6.50E-24 |
| 2572233158 | t3m_01514 | Locus_type     |                                                | CDS                                                              |          |
| 2572233158 | t3m_01514 | Product_name   |                                                | Iron-sulfur cluster assembly accessory protein                   |          |
| 2572233158 | t3m_01514 | Scaffold       |                                                | t3m_contig_70_392_len_17666_read_count_1526455.40                |          |
| 2572233158 | t3m_01514 | Coordinates    |                                                | 14357..14686(-)                                                  |          |
| 2572233158 | t3m_01514 | DNA_length     |                                                | 330bp                                                            |          |
| 2572233158 | t3m_01514 | Protein_length |                                                | 109aa                                                            |          |
| 2572233158 | t3m_01514 | GC             |                                                |                                                                  | 0.67     |
| 2572233159 | t3m_01515 | COG_category   | [R] General function prediction only           |                                                                  |          |
| 2572233159 | t3m_01515 | COG0121        | Predicted glutamine amidotransferase           |                                                                  | 7.00E-10 |
| 2572233159 | t3m_01515 | pfam13230      | GATase_4                                       |                                                                  | 2.00E-09 |
| 2572233159 | t3m_01515 | Locus_type     |                                                | CDS                                                              |          |

|            |           |                |                                                                   |      |
|------------|-----------|----------------|-------------------------------------------------------------------|------|
| 2572233159 | t3m_01515 | Product_name   | Predicted glutamine amidotransferase                              |      |
| 2572233159 | t3m_01515 | Scaffold       | t3m_contig_70_392_len_17666_read_count_1526455.40                 |      |
| 2572233159 | t3m_01515 | Coordinates    | 14821..15666(+)                                                   |      |
| 2572233159 | t3m_01515 | DNA_length     | 846bp                                                             |      |
| 2572233159 | t3m_01515 | Protein_length | 281aa                                                             |      |
| 2572233159 | t3m_01515 | GC             |                                                                   | 0.66 |
|            |           |                |                                                                   |      |
| 2572233160 | t3m_01516 | Locus_type     | CDS                                                               |      |
| 2572233160 | t3m_01516 | Product_name   | hypothetical protein                                              |      |
| 2572233160 | t3m_01516 | Scaffold       | t3m_contig_70_392_len_17666_read_count_1526455.40                 |      |
| 2572233160 | t3m_01516 | Coordinates    | 15708..16619(+)                                                   |      |
| 2572233160 | t3m_01516 | DNA_length     | 912bp                                                             |      |
| 2572233160 | t3m_01516 | Protein_length | 303aa                                                             |      |
| 2572233160 | t3m_01516 | GC             |                                                                   | 0.72 |
|            |           |                |                                                                   |      |
| 2572233161 | t3m_01517 | Locus_type     | CDS                                                               |      |
| 2572233161 | t3m_01517 | Product_name   | hypothetical protein                                              |      |
| 2572233161 | t3m_01517 | Scaffold       | t3m_contig_70_392_len_17666_read_count_1526455.40                 |      |
| 2572233161 | t3m_01517 | Coordinates    | 16689..17495(+)                                                   |      |
| 2572233161 | t3m_01517 | DNA_length     | 807bp                                                             |      |
| 2572233161 | t3m_01517 | Protein_length | 268aa                                                             |      |
| 2572233161 | t3m_01517 | GC             |                                                                   | 0.7  |
|            |           |                |                                                                   |      |
| 2572233162 | t3m_01518 | Locus_type     | CDS                                                               |      |
| 2572233162 | t3m_01518 | Product_name   | hypothetical protein                                              |      |
| 2572233162 | t3m_01518 | Scaffold       | t3m_contig_70_406_len_17358_read_count_1362750.41                 |      |
| 2572233162 | t3m_01518 | Coordinates    | 2..739(-)                                                         |      |
| 2572233162 | t3m_01518 | DNA_length     | 738bp                                                             |      |
| 2572233162 | t3m_01518 | Protein_length | 246aa                                                             |      |
| 2572233162 | t3m_01518 | GC             |                                                                   | 0.7  |
|            |           |                |                                                                   |      |
| 2572233163 | t3m_01519 | KEGG_module    | M00135: GABA biosynthesis, eukaryotes, putrescine => GABA         |      |
| 2572233163 | t3m_01519 | Metacyc        | PWY-6054: dimethylsulfoniopropionate biosynthesis I (Wollastonia) |      |
| 2572233163 | t3m_01519 | Metacyc        | PWY-2501: fatty acid &alpha;-oxidation I                          |      |

|            |           |                |                                                                 |          |
|------------|-----------|----------------|-----------------------------------------------------------------|----------|
| 2572233163 | t3m_01519 | Metacyc        | PWY-6313: serotonin degradation                                 |          |
| 2572233163 | t3m_01519 | Metacyc        | PWY6666-2: dopamine degradation                                 |          |
| 2572233163 | t3m_01519 | Metacyc        | P221-PWY: octane oxidation                                      |          |
| 2572233163 | t3m_01519 | Metacyc        | PWY-6055: dimethylsulfoniopropionate biosynthesis II (Spartina) |          |
| 2572233163 | t3m_01519 | Metacyc        | PWY-2221: Entner-Doudoroff pathway III (semi-phosphorylative)   |          |
| 2572233163 | t3m_01519 | Metacyc        | PWY-6575: juvenile hormone III biosynthesis I                   |          |
| 2572233163 | t3m_01519 | Metacyc        | PWY-6650: juvenile hormone III biosynthesis II                  |          |
| 2572233163 | t3m_01519 | Metacyc        | PWY66-387: fatty acid &alpha;-oxidation II                      |          |
| 2572233163 | t3m_01519 | Metacyc        | PWY-6307: tryptophan degradation X (mammalian, via tryptamine)  |          |
| 2572233163 | t3m_01519 | Metacyc        | PWY-6181: histamine degradation                                 |          |
| 2572233163 | t3m_01519 | Metacyc        | PWY66-388: fatty acid &alpha;-oxidation III                     |          |
| 2572233163 | t3m_01519 | Metacyc        | PWY66-161: oxidative ethanol degradation III                    |          |
| 2572233163 | t3m_01519 | Metacyc        | PWY-2724: alkane oxidation                                      |          |
| 2572233163 | t3m_01519 | Metacyc        | PWY66-21: ethanol degradation II                                |          |
| 2572233163 | t3m_01519 | Metacyc        | PWY66-162: ethanol degradation IV                               |          |
| 2572233163 | t3m_01519 | Metacyc        | PWY-0: putrescine degradation III                               |          |
| 2572233163 | t3m_01519 | Metacyc        | PWY66-389: phytol degradation                                   |          |
| 2572233163 | t3m_01519 | Metacyc        | PWY-6342: noradrenaline and adrenaline degradation              |          |
| 2572233163 | t3m_01519 | COG_category   | [C] Energy production and conversion                            |          |
| 2572233163 | t3m_01519 | COG1012        | NAD-dependent aldehyde dehydrogenases                           | 0.00E+00 |
| 2572233163 | t3m_01519 | pfam00171      | Aldedh                                                          | 0.00E+00 |
| 2572233163 | t3m_01519 | EC:1.2.1.3     | Aldehyde dehydrogenase (NAD(+)).                                |          |
| 2572233163 | t3m_01519 | KO:K00128      | aldehyde dehydrogenase (NAD+) [EC:1.2.1.3]                      | 0.00E+00 |
| 2572233163 | t3m_01519 | Locus_type     | CDS                                                             |          |
| 2572233163 | t3m_01519 | Product_name   | NAD-dependent aldehyde dehydrogenases                           |          |
| 2572233163 | t3m_01519 | Scaffold       | t3m_contig_70_406_len_17358_read_count_1362750.41               |          |
| 2572233163 | t3m_01519 | Coordinates    | 878..2374(+)                                                    |          |
| 2572233163 | t3m_01519 | DNA_length     | 1497bp                                                          |          |
| 2572233163 | t3m_01519 | Protein_length | 498aa                                                           |          |
| 2572233163 | t3m_01519 | GC             |                                                                 | 0.67     |
| 2572233164 | t3m_01520 | Locus_type     | CDS                                                             |          |
| 2572233164 | t3m_01520 | Product_name   | hypothetical protein                                            |          |
| 2572233164 | t3m_01520 | Scaffold       | t3m_contig_70_406_len_17358_read_count_1362750.41               |          |



|            |           |                |                                                                  |           |
|------------|-----------|----------------|------------------------------------------------------------------|-----------|
| 2572233164 | t3m_01520 | Coordinates    | 2371..2592(+)                                                    |           |
| 2572233164 | t3m_01520 | DNA_length     | 222bp                                                            |           |
| 2572233164 | t3m_01520 | Protein_length | 73aa                                                             |           |
| 2572233164 | t3m_01520 | GC             |                                                                  | 0.72      |
| 2572233165 | t3m_01521 | IMG_pathway    | 436: Archaeal replication initiation                             |           |
| 2572233165 | t3m_01521 | COG_category   | [O] Posttranslational modification, protein turnover, chaperones |           |
| 2572233165 | t3m_01521 | COG_category   | [L] Replication, recombination and repair                        |           |
| 2572233165 | t3m_01521 | COG1474        | Cdc6-related protein, AAA superfamily ATPase                     | 7.00E-81  |
| 2572233165 | t3m_01521 | pfam13191      | AAA_16                                                           | 1.30E-12  |
| 2572233165 | t3m_01521 | pfam09079      | Cdc6_C                                                           | 1.70E-20  |
| 2572233165 | t3m_01521 | TIGR02928      | orc1/cdc6 family replication initiation protein                  | 4.30E-122 |
| 2572233165 | t3m_01521 | KO:K10725      | archaeal cell division control protein 6                         | 0.00E+00  |
| 2572233165 | t3m_01521 | ITERM:00091    | ORC complex protein Cdc6/Orc1                                    |           |
| 2572233165 | t3m_01521 | Locus_type     | CDS                                                              |           |
| 2572233165 | t3m_01521 | Product_name   | ORC complex protein Cdc6/Orc1                                    |           |
| 2572233165 | t3m_01521 | Scaffold       | t3m_contig_70_406_len_17358_read_count_1362750.41                |           |
| 2572233165 | t3m_01521 | Coordinates    | 2664..3974(-)                                                    |           |
| 2572233165 | t3m_01521 | DNA_length     | 1311bp                                                           |           |
| 2572233165 | t3m_01521 | Protein_length | 436aa                                                            |           |
| 2572233165 | t3m_01521 | GC             |                                                                  | 0.67      |
| 2572233166 | t3m_01522 | Locus_type     | CDS                                                              |           |
| 2572233166 | t3m_01522 | Product_name   | hypothetical protein                                             |           |
| 2572233166 | t3m_01522 | Scaffold       | t3m_contig_70_406_len_17358_read_count_1362750.41                |           |
| 2572233166 | t3m_01522 | Coordinates    | 3928..4422(+)                                                    |           |
| 2572233166 | t3m_01522 | DNA_length     | 495bp                                                            |           |
| 2572233166 | t3m_01522 | Protein_length | 164aa                                                            |           |
| 2572233166 | t3m_01522 | GC             |                                                                  | 0.69      |
| 2572233167 | t3m_01523 | Metacyc        | PWY-6174: mevalonate pathway II (archaea)                        |           |
| 2572233167 | t3m_01523 | COG_category   | [R] General function prediction only                             |           |
| 2572233167 | t3m_01523 | COG1608        | Predicted archaeal kinase                                        | 9.00E-42  |
| 2572233167 | t3m_01523 | pfam00696      | AA_kinase                                                        | 1.00E-27  |

|            |           |                |                                                                                            |           |
|------------|-----------|----------------|--------------------------------------------------------------------------------------------|-----------|
| 2572233167 | t3m_01523 | EC:2.7.4.26    | Isopentenyl phosphate kinase.                                                              |           |
| 2572233167 | t3m_01523 | KO:K06981      | isopentenyl phosphate kinase [EC:2.7.4.26]                                                 | 3.80E-31  |
| 2572233167 | t3m_01523 | Locus_type     | CDS                                                                                        |           |
| 2572233167 | t3m_01523 | Product_name   | Predicted archaeal kinase                                                                  |           |
| 2572233167 | t3m_01523 | Scaffold       | t3m_contig_70_406_len_17358_read_count_1362750.41                                          |           |
| 2572233167 | t3m_01523 | Coordinates    | 4391..5257(+)                                                                              |           |
| 2572233167 | t3m_01523 | DNA_length     | 867bp                                                                                      |           |
| 2572233167 | t3m_01523 | Protein_length | 288aa                                                                                      |           |
| 2572233167 | t3m_01523 | GC             |                                                                                            | 0.71      |
| 2572233168 | t3m_01524 | KEGG_module    | M00364: C10-C20 isoprenoid biosynthesis, bacteria                                          |           |
| 2572233168 | t3m_01524 | KEGG_module    | M00096: C5 isoprenoid biosynthesis, non-mevalonate pathway                                 |           |
| 2572233168 | t3m_01524 | KEGG_module    | M00095: C5 isoprenoid biosynthesis, mevalonate pathway                                     |           |
| 2572233168 | t3m_01524 | KEGG_module    | M00365: C10-C20 isoprenoid biosynthesis, archaea                                           |           |
| 2572233168 | t3m_01524 | KEGG_module    | M00367: C10-C20 isoprenoid biosynthesis, non-plant eukaryotes                              |           |
| 2572233168 | t3m_01524 | KEGG_module    | M00366: C10-C20 isoprenoid biosynthesis, plants                                            |           |
| 2572233168 | t3m_01524 | Metacyc        | PWY-6174: mevalonate pathway II (archaea)                                                  |           |
| 2572233168 | t3m_01524 | Metacyc        | PWY-7102: bisabolene biosynthesis                                                          |           |
| 2572233168 | t3m_01524 | Metacyc        | PWY-6383: mono-<i>trans</i>, poly-<i>cis</i> decaprenyl phosphate biosynthesis             |           |
| 2572233168 | t3m_01524 | Metacyc        | NONMEVIPP-PWY: methylerythritol phosphate pathway                                          |           |
| 2572233168 | t3m_01524 | Metacyc        | PWY-5123: <i>trans</i>, <i>trans</i>-farnesyl diphosphate biosynthesis                     |           |
| 2572233168 | t3m_01524 | Metacyc        | PWY-922: mevalonate pathway I                                                              |           |
| 2572233168 | t3m_01524 | Metacyc        | PWY-6859: <i>all-trans</i>-farnesol biosynthesis                                           |           |
| 2572233168 | t3m_01524 | IMG_pathway    | 365: dimethylallyl pyrophosphate biosynthesis via isomerization of isopentenyl diphosphate |           |
| 2572233168 | t3m_01524 | COG_category   | [C] Energy production and conversion                                                       |           |
| 2572233168 | t3m_01524 | COG1304        | L-lactate dehydrogenase (FMN-dependent) and related alpha-hydroxy a                        | 2.00E-65  |
| 2572233168 | t3m_01524 | pfam01070      | FMN_dh                                                                                     | 6.30E-09  |
| 2572233168 | t3m_01524 | pfam01070      | FMN_dh                                                                                     | 9.90E-18  |
| 2572233168 | t3m_01524 | EC:5.3.3.2     | Isopentenyl-diphosphate Delta-isomerase.                                                   |           |
| 2572233168 | t3m_01524 | TIGR02151      | isopentenyl-diphosphate delta-isomerase, type 2                                            | 4.70E-114 |
| 2572233168 | t3m_01524 | KO:K01823      | isopentenyl-diphosphate delta-isomerase [EC:5.3.3.2]                                       | 0.00E+00  |
| 2572233168 | t3m_01524 | ITERM:00469    | isopentenyl-diphosphate delta-isomerase (EC 5.3.3.2)                                       |           |
| 2572233168 | t3m_01524 | Locus_type     | CDS                                                                                        |           |
| 2572233168 | t3m_01524 | Product_name   | isopentenyl-diphosphate delta-isomerase (EC 5.3.3.2)                                       |           |

|            |           |                |                                                                 |          |
|------------|-----------|----------------|-----------------------------------------------------------------|----------|
| 2572233168 | t3m_01524 | Scaffold       | t3m_contig_70_406_len_17358_read_count_1362750.41               |          |
| 2572233168 | t3m_01524 | Coordinates    | 5241..6332(+)                                                   |          |
| 2572233168 | t3m_01524 | DNA_length     | 1092bp                                                          |          |
| 2572233168 | t3m_01524 | Protein_length | 363aa                                                           |          |
| 2572233168 | t3m_01524 | GC             |                                                                 | 0.69     |
|            |           |                |                                                                 |          |
| 2572233169 | t3m_01525 | COG_category   | [K] Transcription                                               |          |
| 2572233169 | t3m_01525 | COG_category   | [B] Chromatin structure and dynamics                            |          |
| 2572233169 | t3m_01525 | COG1243        | Histone acetyltransferase                                       | 0.00E+00 |
| 2572233169 | t3m_01525 | pfam00583      | Acetyltransf_1                                                  | 7.30E-09 |
| 2572233169 | t3m_01525 | pfam04055      | Radical_SAM                                                     | 1.00E-14 |
| 2572233169 | t3m_01525 | EC:2.3.1.48    | Histone acetyltransferase.                                      |          |
| 2572233169 | t3m_01525 | TIGR01211      | histone acetyltransferase, ELP3 family                          | 0.00E+00 |
| 2572233169 | t3m_01525 | KO:K07739      | elongator complex protein 3 [EC:2.3.1.48]                       | 0.00E+00 |
| 2572233169 | t3m_01525 | Locus_type     | CDS                                                             |          |
| 2572233169 | t3m_01525 | Product_name   | histone acetyltransferase, ELP3 family                          |          |
| 2572233169 | t3m_01525 | Scaffold       | t3m_contig_70_406_len_17358_read_count_1362750.41               |          |
| 2572233169 | t3m_01525 | Coordinates    | 6317..7864(+)                                                   |          |
| 2572233169 | t3m_01525 | DNA_length     | 1548bp                                                          |          |
| 2572233169 | t3m_01525 | Protein_length | 515aa                                                           |          |
| 2572233169 | t3m_01525 | GC             |                                                                 | 0.69     |
|            |           |                |                                                                 |          |
| 2572233170 | t3m_01526 | KEGG_module    | M00034: Methionine salvage pathway                              |          |
| 2572233170 | t3m_01526 | KEGG_module    | M00368: Ethylene biosynthesis, methionine => ethylene           |          |
| 2572233170 | t3m_01526 | KEGG_module    | M00035: Methionine degradation                                  |          |
| 2572233170 | t3m_01526 | Metacyc        | PWY-5912: 2'-deoxymugineic acid phytosiderophore biosynthesis   |          |
| 2572233170 | t3m_01526 | Metacyc        | PWY-5041: <i>S</i>-adenosyl-L-methionine cycle II               |          |
| 2572233170 | t3m_01526 | Metacyc        | METHIONINE-DEG1-PWY: methionine degradation I (to homocysteine) |          |
| 2572233170 | t3m_01526 | Metacyc        | ETHYL-PWY: ethylene biosynthesis I (plants)                     |          |
| 2572233170 | t3m_01526 | Metacyc        | SAM-PWY: S-adenosyl-L-methionine biosynthesis                   |          |
| 2572233170 | t3m_01526 | COG_category   | [E] Amino acid transport and metabolism                         |          |
| 2572233170 | t3m_01526 | COG1812        | Archaeal S-adenosylmethionine synthetase                        | 0.00E+00 |
| 2572233170 | t3m_01526 | pfam01941      | AdoMet_Synthase                                                 | 0.00E+00 |
| 2572233170 | t3m_01526 | EC:2.5.1.6     | Methionine adenosyltransferase.                                 |          |

|            |           |                |                                                     |           |
|------------|-----------|----------------|-----------------------------------------------------|-----------|
| 2572233170 | t3m_01526 | KO:K00789      | S-adenosylmethionine synthetase [EC:2.5.1.6]        | 0.00E+00  |
| 2572233170 | t3m_01526 | Locus_type     | CDS                                                 |           |
| 2572233170 | t3m_01526 | Product_name   | methionine adenosyltransferase (EC 2.5.1.6)         |           |
| 2572233170 | t3m_01526 | Scaffold       | t3m_contig_70_406_len_17358_read_count_1362750.41   |           |
| 2572233170 | t3m_01526 | Coordinates    | 7948..9144(+)                                       |           |
| 2572233170 | t3m_01526 | DNA_length     | 1197bp                                              |           |
| 2572233170 | t3m_01526 | Protein_length | 398aa                                               |           |
| 2572233170 | t3m_01526 | GC             |                                                     | 0.65      |
| 2572233171 | t3m_01527 | COG_category   | [J] Translation, ribosomal structure and biogenesis |           |
| 2572233171 | t3m_01527 | COG0621        | 2-methylthioadenine synthetase                      | 9.00E-91  |
| 2572233171 | t3m_01527 | pfam04055      | Radical_SAM                                         | 3.20E-22  |
| 2572233171 | t3m_01527 | pfam00919      | UPF0004                                             | 1.30E-11  |
| 2572233171 | t3m_01527 | TIGR00089      | radical SAM methylthiotransferase, MiaB/RimO family | 5.70E-91  |
| 2572233171 | t3m_01527 | TIGR01578      | MiaB-like tRNA modifying enzyme, archaeal-type      | 3.00E-104 |
| 2572233171 | t3m_01527 | Locus_type     | CDS                                                 |           |
| 2572233171 | t3m_01527 | Product_name   | MiaB-like tRNA modifying enzyme, archaeal-type      |           |
| 2572233171 | t3m_01527 | Scaffold       | t3m_contig_70_406_len_17358_read_count_1362750.41   |           |
| 2572233171 | t3m_01527 | Coordinates    | 9170..10438(+)                                      |           |
| 2572233171 | t3m_01527 | DNA_length     | 1269bp                                              |           |
| 2572233171 | t3m_01527 | Protein_length | 422aa                                               |           |
| 2572233171 | t3m_01527 | GC             |                                                     | 0.7       |
| 2572233172 | t3m_01528 | pfam12773      | DZR                                                 | 2.20E-06  |
| 2572233172 | t3m_01528 | Locus_type     | CDS                                                 |           |
| 2572233172 | t3m_01528 | Product_name   | Double zinc ribbon                                  |           |
| 2572233172 | t3m_01528 | Scaffold       | t3m_contig_70_406_len_17358_read_count_1362750.41   |           |
| 2572233172 | t3m_01528 | Coordinates    | 10518..11465(+)                                     |           |
| 2572233172 | t3m_01528 | DNA_length     | 948bp                                               |           |
| 2572233172 | t3m_01528 | Protein_length | 315aa                                               |           |
| 2572233172 | t3m_01528 | GC             |                                                     | 0.72      |
| 2572233172 | t3m_01528 | Transmembrane  | Yes                                                 |           |
| 2572233173 | t3m_01529 | COG_category   | [S] Function unknown                                |           |

|            |           |                |                                                                 |           |
|------------|-----------|----------------|-----------------------------------------------------------------|-----------|
| 2572233173 | t3m_01529 | COG1602        | Uncharacterized conserved protein                               | 1.00E-106 |
| 2572233173 | t3m_01529 | pfam04894      | DUF650                                                          | 4.80E-86  |
| 2572233173 | t3m_01529 | pfam04895      | DUF651                                                          | 1.10E-32  |
| 2572233173 | t3m_01529 | Locus_type     | CDS                                                             |           |
| 2572233173 | t3m_01529 | Product_name   | Uncharacterized conserved protein                               |           |
| 2572233173 | t3m_01529 | Scaffold       | t3m_contig_70_406_len_17358_read_count_1362750.41               |           |
| 2572233173 | t3m_01529 | Coordinates    | 11478..12806(-)                                                 |           |
| 2572233173 | t3m_01529 | DNA_length     | 1329bp                                                          |           |
| 2572233173 | t3m_01529 | Protein_length | 442aa                                                           |           |
| 2572233173 | t3m_01529 | GC             |                                                                 | 0.67      |
| 2572233174 | t3m_01530 | Locus_type     | tRNA                                                            |           |
| 2572233174 | t3m_01530 | Product_name   | tRNA_Pro_CGG                                                    |           |
| 2572233174 | t3m_01530 | Scaffold       | t3m_contig_70_406_len_17358_read_count_1362750.41               |           |
| 2572233174 | t3m_01530 | Coordinates    | 12933..13007(+)                                                 |           |
| 2572233174 | t3m_01530 | DNA_length     | 75bp                                                            |           |
| 2572233174 | t3m_01530 | GC             |                                                                 | 0.63      |
| 2572233175 | t3m_01531 | COG_category   | [R] General function prediction only                            |           |
| 2572233175 | t3m_01531 | COG0491        | Zn-dependent hydrolases, including glyoxylases                  | 1.00E-15  |
| 2572233175 | t3m_01531 | pfam00753      | Lactamase_B                                                     | 1.70E-26  |
| 2572233175 | t3m_01531 | Locus_type     | CDS                                                             |           |
| 2572233175 | t3m_01531 | Product_name   | Zn-dependent hydrolases, including glyoxylases                  |           |
| 2572233175 | t3m_01531 | Scaffold       | t3m_contig_70_406_len_17358_read_count_1362750.41               |           |
| 2572233175 | t3m_01531 | Coordinates    | 13058..13726(-)                                                 |           |
| 2572233175 | t3m_01531 | DNA_length     | 669bp                                                           |           |
| 2572233175 | t3m_01531 | Protein_length | 222aa                                                           |           |
| 2572233175 | t3m_01531 | GC             |                                                                 | 0.65      |
| 2572233176 | t3m_01532 | COG_category   | [C] Energy production and conversion                            |           |
| 2572233176 | t3m_01532 | COG2141        | Coenzyme F420-dependent N5,N10-methylene tetrahydromethanopteri | 4.00E-30  |
| 2572233176 | t3m_01532 | pfam00296      | Bac_luciferase                                                  | 7.00E-54  |
| 2572233176 | t3m_01532 | Locus_type     | CDS                                                             |           |
| 2572233176 | t3m_01532 | Product_name   | Coenzyme F420-dependent N5,N10-methylene tetrahydromethanopteri |           |

|            |           |                |                                                                       |          |
|------------|-----------|----------------|-----------------------------------------------------------------------|----------|
| 2572233176 | t3m_01532 | Scaffold       | t3m_contig_70_406_len_17358_read_count_1362750.41                     |          |
| 2572233176 | t3m_01532 | Coordinates    | 13759..14766(-)                                                       |          |
| 2572233176 | t3m_01532 | DNA_length     | 1008bp                                                                |          |
| 2572233176 | t3m_01532 | Protein_length | 335aa                                                                 |          |
| 2572233176 | t3m_01532 | GC             |                                                                       | 0.69     |
| 2572233177 | t3m_01533 | COG_category   | [F] Nucleotide transport and metabolism                               |          |
| 2572233177 | t3m_01533 | COG1051        | ADP-ribose pyrophosphatase                                            | 5.00E-04 |
| 2572233177 | t3m_01533 | pfam00293      | NUDIX                                                                 | 6.40E-13 |
| 2572233177 | t3m_01533 | Locus_type     | CDS                                                                   |          |
| 2572233177 | t3m_01533 | Product_name   | ADP-ribose pyrophosphatase                                            |          |
| 2572233177 | t3m_01533 | Scaffold       | t3m_contig_70_406_len_17358_read_count_1362750.41                     |          |
| 2572233177 | t3m_01533 | Coordinates    | 14798..15574(+)                                                       |          |
| 2572233177 | t3m_01533 | DNA_length     | 777bp                                                                 |          |
| 2572233177 | t3m_01533 | Protein_length | 258aa                                                                 |          |
| 2572233177 | t3m_01533 | GC             |                                                                       | 0.68     |
| 2572233178 | t3m_01534 | Locus_type     | tRNA                                                                  |          |
| 2572233178 | t3m_01534 | Product_name   | tRNA_Ala_TGC                                                          |          |
| 2572233178 | t3m_01534 | Scaffold       | t3m_contig_70_406_len_17358_read_count_1362750.41                     |          |
| 2572233178 | t3m_01534 | Coordinates    | 15604..15677(+)                                                       |          |
| 2572233178 | t3m_01534 | DNA_length     | 74bp                                                                  |          |
| 2572233178 | t3m_01534 | GC             |                                                                       | 0.59     |
| 2572233179 | t3m_01535 | KEGG_module    | M00239: Peptides/nickel transport system                              |          |
| 2572233179 | t3m_01535 | COG_category   | [P] Inorganic ion transport and metabolism                            |          |
| 2572233179 | t3m_01535 | COG_category   | [E] Amino acid transport and metabolism                               |          |
| 2572233179 | t3m_01535 | COG1173        | ABC-type dipeptide/oligopeptide/nickel transport systems, permease c  | 4.00E-26 |
| 2572233179 | t3m_01535 | pfam00528      | BPD_transp_1                                                          | 1.00E-15 |
| 2572233179 | t3m_01535 | KO:K02034      | peptide/nickel transport system permease protein                      | 8.20E-23 |
| 2572233179 | t3m_01535 | Locus_type     | CDS                                                                   |          |
| 2572233179 | t3m_01535 | Product_name   | ABC-type dipeptide/oligopeptide/nickel transport systems, permease co |          |
| 2572233179 | t3m_01535 | Scaffold       | t3m_contig_70_406_len_17358_read_count_1362750.41                     |          |
| 2572233179 | t3m_01535 | Coordinates    | 15765..16691(-)                                                       |          |

|            |           |                |                                      |                                                                   |          |
|------------|-----------|----------------|--------------------------------------|-------------------------------------------------------------------|----------|
| 2572233179 | t3m_01535 | DNA_length     |                                      | 927bp                                                             |          |
| 2572233179 | t3m_01535 | Protein_length |                                      | 308aa                                                             |          |
| 2572233179 | t3m_01535 | GC             |                                      |                                                                   | 0.67     |
| 2572233179 | t3m_01535 | Signal_peptide |                                      | Yes                                                               |          |
| 2572233179 | t3m_01535 | Transmembrane  |                                      | Yes                                                               |          |
| 2572233180 | t3m_01536 | pfam00528      | BPD_transp_1                         |                                                                   | 7.90E-12 |
| 2572233180 | t3m_01536 | Locus_type     |                                      | CDS                                                               |          |
| 2572233180 | t3m_01536 | Product_name   |                                      | Binding-protein-dependent transport system inner membrane compone |          |
| 2572233180 | t3m_01536 | Scaffold       |                                      | t3m_contig_70_406_len_17358_read_count_1362750.41                 |          |
| 2572233180 | t3m_01536 | Coordinates    |                                      | 16805..17356(-)                                                   |          |
| 2572233180 | t3m_01536 | DNA_length     |                                      | 552bp                                                             |          |
| 2572233180 | t3m_01536 | Protein_length |                                      | 183aa                                                             |          |
| 2572233180 | t3m_01536 | GC             |                                      |                                                                   | 0.65     |
| 2572233180 | t3m_01536 | Transmembrane  |                                      | Yes                                                               |          |
| 2572233181 | t3m_01537 | pfam00118      | Cpn60_TCP1                           |                                                                   | 8.70E-70 |
| 2572233181 | t3m_01537 | Locus_type     |                                      | CDS                                                               |          |
| 2572233181 | t3m_01537 | Product_name   |                                      | TCP-1/cpn60 chaperonin family                                     |          |
| 2572233181 | t3m_01537 | Scaffold       |                                      | t3m_contig_70_492_len_15272_read_count_1289910.42                 |          |
| 2572233181 | t3m_01537 | Coordinates    |                                      | 3..788(-)                                                         |          |
| 2572233181 | t3m_01537 | DNA_length     |                                      | 786bp                                                             |          |
| 2572233181 | t3m_01537 | Protein_length |                                      | 262aa                                                             |          |
| 2572233181 | t3m_01537 | GC             |                                      |                                                                   | 0.64     |
| 2572233182 | t3m_01538 | COG_category   | [R] General function prediction only |                                                                   |          |
| 2572233182 | t3m_01538 | COG5006        | Predicted permease, DMT superfamily  |                                                                   | 8.00E-10 |
| 2572233182 | t3m_01538 | pfam00892      | EamA                                 |                                                                   | 3.70E-13 |
| 2572233182 | t3m_01538 | Locus_type     |                                      | CDS                                                               |          |
| 2572233182 | t3m_01538 | Product_name   |                                      | Predicted permease, DMT superfamily                               |          |
| 2572233182 | t3m_01538 | Scaffold       |                                      | t3m_contig_70_492_len_15272_read_count_1289910.42                 |          |
| 2572233182 | t3m_01538 | Coordinates    |                                      | 970..1890(+)                                                      |          |
| 2572233182 | t3m_01538 | DNA_length     |                                      | 921bp                                                             |          |
| 2572233182 | t3m_01538 | Protein_length |                                      | 306aa                                                             |          |

|            |           |                |                                                   |          |
|------------|-----------|----------------|---------------------------------------------------|----------|
| 2572233182 | t3m_01538 | GC             |                                                   | 0.69     |
| 2572233182 | t3m_01538 | Transmembrane  | Yes                                               |          |
| 2572233183 | t3m_01539 | pfam00583      | Acetyltransf_1                                    | 1.40E-14 |
| 2572233183 | t3m_01539 | Locus_type     | CDS                                               |          |
| 2572233183 | t3m_01539 | Product_name   | Acetyltransferase (GNAT) family                   |          |
| 2572233183 | t3m_01539 | Scaffold       | t3m_contig_70_492_len_15272_read_count_1289910.42 |          |
| 2572233183 | t3m_01539 | Coordinates    | 1957..2919(+)                                     |          |
| 2572233183 | t3m_01539 | DNA_length     | 963bp                                             |          |
| 2572233183 | t3m_01539 | Protein_length | 320aa                                             |          |
| 2572233183 | t3m_01539 | GC             |                                                   | 0.69     |
| 2572233184 | t3m_01540 | Locus_type     | CDS                                               |          |
| 2572233184 | t3m_01540 | Product_name   | hypothetical protein                              |          |
| 2572233184 | t3m_01540 | Scaffold       | t3m_contig_70_492_len_15272_read_count_1289910.42 |          |
| 2572233184 | t3m_01540 | Coordinates    | 2966..3496(-)                                     |          |
| 2572233184 | t3m_01540 | DNA_length     | 531bp                                             |          |
| 2572233184 | t3m_01540 | Protein_length | 176aa                                             |          |
| 2572233184 | t3m_01540 | GC             |                                                   | 0.67     |
| 2572233185 | t3m_01541 | COG_category   | [R] General function prediction only              |          |
| 2572233185 | t3m_01541 | COG4122        | Predicted O-methyltransferase                     | 5.00E-42 |
| 2572233185 | t3m_01541 | pfam01596      | Methyltransf_3                                    | 1.40E-46 |
| 2572233185 | t3m_01541 | Locus_type     | CDS                                               |          |
| 2572233185 | t3m_01541 | Product_name   | Predicted O-methyltransferase                     |          |
| 2572233185 | t3m_01541 | Scaffold       | t3m_contig_70_492_len_15272_read_count_1289910.42 |          |
| 2572233185 | t3m_01541 | Coordinates    | 3497..4177(-)                                     |          |
| 2572233185 | t3m_01541 | DNA_length     | 681bp                                             |          |
| 2572233185 | t3m_01541 | Protein_length | 226aa                                             |          |
| 2572233185 | t3m_01541 | GC             |                                                   | 0.69     |
| 2572233186 | t3m_01542 | pfam13249      | Prenyltrans_2                                     | 2.50E-09 |
| 2572233186 | t3m_01542 | Locus_type     | CDS                                               |          |
| 2572233186 | t3m_01542 | Product_name   | Prenyltransferase-like                            |          |



|            |           |                |                                                                             |          |
|------------|-----------|----------------|-----------------------------------------------------------------------------|----------|
| 2572233186 | t3m_01542 | Scaffold       | t3m_contig_70_492_len_15272_read_count_1289910.42                           |          |
| 2572233186 | t3m_01542 | Coordinates    | 4174..5199(-)                                                               |          |
| 2572233186 | t3m_01542 | DNA_length     | 1026bp                                                                      |          |
| 2572233186 | t3m_01542 | Protein_length | 341aa                                                                       |          |
| 2572233186 | t3m_01542 | GC             |                                                                             | 0.68     |
| 2572233187 | t3m_01543 | COG_category   | [J] Translation, ribosomal structure and biogenesis                         |          |
| 2572233187 | t3m_01543 | COG0030        | Dimethyladenosine transferase (rRNA methylation)                            | 2.00E-55 |
| 2572233187 | t3m_01543 | pfam00398      | RrnaAD                                                                      | 1.40E-43 |
| 2572233187 | t3m_01543 | EC:2.1.1.182   | 16S rRNA (adenine(1518)-N(6)/adenine(1519)-N(6))-dimethyltransferase.       |          |
| 2572233187 | t3m_01543 | TIGR00755      | dimethyladenosine transferase                                               | 1.80E-64 |
| 2572233187 | t3m_01543 | KO:K02528      | 16S rRNA (adenine1518-N6/adenine1519-N6)-dimethyltransferase [EC:2.1.1.182] | 2.80E-39 |
| 2572233187 | t3m_01543 | ITERM:02532    | dimethyladenosine transferase (EC 2.1.1.-)                                  |          |
| 2572233187 | t3m_01543 | Locus_type     | CDS                                                                         |          |
| 2572233187 | t3m_01543 | Product_name   | dimethyladenosine transferase (EC 2.1.1.-)                                  |          |
| 2572233187 | t3m_01543 | Scaffold       | t3m_contig_70_492_len_15272_read_count_1289910.42                           |          |
| 2572233187 | t3m_01543 | Coordinates    | 5310..6149(-)                                                               |          |
| 2572233187 | t3m_01543 | DNA_length     | 840bp                                                                       |          |
| 2572233187 | t3m_01543 | Protein_length | 279aa                                                                       |          |
| 2572233187 | t3m_01543 | GC             |                                                                             | 0.71     |
| 2572233188 | t3m_01544 | COG_category   | [J] Translation, ribosomal structure and biogenesis                         |          |
| 2572233188 | t3m_01544 | COG1491        | Predicted RNA-binding protein                                               | 4.00E-47 |
| 2572233188 | t3m_01544 | pfam04919      | DUF655                                                                      | 9.60E-55 |
| 2572233188 | t3m_01544 | KO:K07572      | putative nucleotide binding protein                                         | 4.20E-45 |
| 2572233188 | t3m_01544 | Locus_type     | CDS                                                                         |          |
| 2572233188 | t3m_01544 | Product_name   | Predicted RNA-binding protein                                               |          |
| 2572233188 | t3m_01544 | Scaffold       | t3m_contig_70_492_len_15272_read_count_1289910.42                           |          |
| 2572233188 | t3m_01544 | Coordinates    | 6178..6723(-)                                                               |          |
| 2572233188 | t3m_01544 | DNA_length     | 546bp                                                                       |          |
| 2572233188 | t3m_01544 | Protein_length | 181aa                                                                       |          |
| 2572233188 | t3m_01544 | GC             |                                                                             | 0.68     |
| 2572233189 | t3m_01545 | KEGG_module    | M00184: RNA polymerase, archaea                                             |          |

|            |           |                |                                                                               |           |
|------------|-----------|----------------|-------------------------------------------------------------------------------|-----------|
| 2572233189 | t3m_01545 | COG_category   | [S] Function unknown                                                          |           |
| 2572233189 | t3m_01545 | COG1460        | Uncharacterized protein conserved in archaea                                  | 3.00E-13  |
| 2572233189 | t3m_01545 | pfam03874      | RNA_pol_Rpb4                                                                  | 7.60E-07  |
| 2572233189 | t3m_01545 | EC:2.7.7.6     | DNA-directed RNA polymerase.                                                  |           |
| 2572233189 | t3m_01545 | KO:K03051      | DNA-directed RNA polymerase subunit F [EC:2.7.7.6]                            | 1.50E-17  |
| 2572233189 | t3m_01545 | ITERM:01967    | DNA-directed RNA polymerase, subunit F (EC 2.7.7.6)                           |           |
| 2572233189 | t3m_01545 | Locus_type     | CDS                                                                           |           |
| 2572233189 | t3m_01545 | Product_name   | DNA-directed RNA polymerase, subunit F (EC 2.7.7.6)                           |           |
| 2572233189 | t3m_01545 | Scaffold       | t3m_contig_70_492_len_15272_read_count_1289910.42                             |           |
| 2572233189 | t3m_01545 | Coordinates    | 6740..7054(-)                                                                 |           |
| 2572233189 | t3m_01545 | DNA_length     | 315bp                                                                         |           |
| 2572233189 | t3m_01545 | Protein_length | 104aa                                                                         |           |
| 2572233189 | t3m_01545 | GC             |                                                                               | 0.69      |
| 2572233190 | t3m_01546 | KEGG_module    | M00179: Ribosome, archaea                                                     |           |
| 2572233190 | t3m_01546 | KEGG_module    | M00177: Ribosome, eukaryotes                                                  |           |
| 2572233190 | t3m_01546 | COG_category   | [J] Translation, ribosomal structure and biogenesis                           |           |
| 2572233190 | t3m_01546 | COG2139        | Ribosomal protein L21E                                                        | 2.00E-24  |
| 2572233190 | t3m_01546 | pfam01157      | Ribosomal_L21e                                                                | 1.10E-21  |
| 2572233190 | t3m_01546 | KO:K02889      | large subunit ribosomal protein L21e                                          | 3.10E-20  |
| 2572233190 | t3m_01546 | Locus_type     | CDS                                                                           |           |
| 2572233190 | t3m_01546 | Product_name   | Ribosomal protein L21E                                                        |           |
| 2572233190 | t3m_01546 | Scaffold       | t3m_contig_70_492_len_15272_read_count_1289910.42                             |           |
| 2572233190 | t3m_01546 | Coordinates    | 7047..7358(-)                                                                 |           |
| 2572233190 | t3m_01546 | DNA_length     | 312bp                                                                         |           |
| 2572233190 | t3m_01546 | Protein_length | 103aa                                                                         |           |
| 2572233190 | t3m_01546 | GC             |                                                                               | 0.7       |
| 2572233191 | t3m_01547 | Metacyc        | RIBOKIN-PWY: ribose degradation                                               |           |
| 2572233191 | t3m_01547 | COG_category   | [J] Translation, ribosomal structure and biogenesis                           |           |
| 2572233191 | t3m_01547 | COG1258        | Predicted pseudouridylate synthase                                            | 1.00E-93  |
| 2572233191 | t3m_01547 | EC:5.4.99.-    | Isomerases. Intramolecular transferases (mutases). Transferring other groups. |           |
| 2572233191 | t3m_01547 | TIGR01213      | tRNA pseudouridine(54/55) synthase                                            | 1.90E-113 |
| 2572233191 | t3m_01547 | KO:K07583      | tRNA pseudouridine synthase 10 [EC:5.4.99.-]                                  | 0.00E+00  |

|            |           |                |                                                   |                                                   |          |
|------------|-----------|----------------|---------------------------------------------------|---------------------------------------------------|----------|
| 2572233191 | t3m_01547 | Locus_type     |                                                   | CDS                                               |          |
| 2572233191 | t3m_01547 | Product_name   |                                                   | tRNA pseudouridine(54/55) synthase                |          |
| 2572233191 | t3m_01547 | Scaffold       |                                                   | t3m_contig_70_492_len_15272_read_count_1289910.42 |          |
| 2572233191 | t3m_01547 | Coordinates    |                                                   | 7363..8598(-)                                     |          |
| 2572233191 | t3m_01547 | DNA_length     |                                                   | 1236bp                                            |          |
| 2572233191 | t3m_01547 | Protein_length |                                                   | 411aa                                             |          |
| 2572233191 | t3m_01547 | GC             |                                                   |                                                   | 0.69     |
|            |           |                |                                                   |                                                   |          |
| 2572233192 | t3m_01548 | Locus_type     |                                                   | CDS                                               |          |
| 2572233192 | t3m_01548 | Product_name   |                                                   | hypothetical protein                              |          |
| 2572233192 | t3m_01548 | Scaffold       |                                                   | t3m_contig_70_492_len_15272_read_count_1289910.42 |          |
| 2572233192 | t3m_01548 | Coordinates    |                                                   | 8697..9098(+)                                     |          |
| 2572233192 | t3m_01548 | DNA_length     |                                                   | 402bp                                             |          |
| 2572233192 | t3m_01548 | Protein_length |                                                   | 133aa                                             |          |
| 2572233192 | t3m_01548 | GC             |                                                   |                                                   | 0.7      |
|            |           |                |                                                   |                                                   |          |
| 2572233193 | t3m_01549 | pfam13367      | PrsW-protease                                     |                                                   | 1.00E-25 |
| 2572233193 | t3m_01549 | Locus_type     |                                                   | CDS                                               |          |
| 2572233193 | t3m_01549 | Product_name   |                                                   | Protease prsW family                              |          |
| 2572233193 | t3m_01549 | Scaffold       |                                                   | t3m_contig_70_492_len_15272_read_count_1289910.42 |          |
| 2572233193 | t3m_01549 | Coordinates    |                                                   | 9111..9956(-)                                     |          |
| 2572233193 | t3m_01549 | DNA_length     |                                                   | 846bp                                             |          |
| 2572233193 | t3m_01549 | Protein_length |                                                   | 281aa                                             |          |
| 2572233193 | t3m_01549 | GC             |                                                   |                                                   | 0.69     |
| 2572233193 | t3m_01549 | Transmembrane  |                                                   | Yes                                               |          |
|            |           |                |                                                   |                                                   |          |
| 2572233194 | t3m_01550 | COG_category   | [I] Lipid transport and metabolism                |                                                   |          |
| 2572233194 | t3m_01550 | COG1250        | 3-hydroxyacyl-CoA dehydrogenase                   |                                                   | 5.00E-86 |
| 2572233194 | t3m_01550 | pfam00725      | 3HCDH                                             |                                                   | 3.30E-31 |
| 2572233194 | t3m_01550 | pfam02737      | 3HCDH_N                                           |                                                   | 1.10E-57 |
| 2572233194 | t3m_01550 | EC:1.1.1.157   | 3-hydroxybutyryl-CoA dehydrogenase.               |                                                   |          |
| 2572233194 | t3m_01550 | KO:K00074      | 3-hydroxybutyryl-CoA dehydrogenase [EC:1.1.1.157] |                                                   | 0.00E+00 |
| 2572233194 | t3m_01550 | Locus_type     |                                                   | CDS                                               |          |
| 2572233194 | t3m_01550 | Product_name   |                                                   | 3-hydroxyacyl-CoA dehydrogenase                   |          |

|            |           |                |                                                                          |          |
|------------|-----------|----------------|--------------------------------------------------------------------------|----------|
| 2572233194 | t3m_01550 | Scaffold       | t3m_contig_70_492_len_15272_read_count_1289910.42                        |          |
| 2572233194 | t3m_01550 | Coordinates    | 9953..10870(-)                                                           |          |
| 2572233194 | t3m_01550 | DNA_length     | 918bp                                                                    |          |
| 2572233194 | t3m_01550 | Protein_length | 305aa                                                                    |          |
| 2572233194 | t3m_01550 | GC             |                                                                          | 0.69     |
| 2572233195 | t3m_01551 | COG_category   | [D] Cell cycle control, cell division, chromosome partitioning           |          |
| 2572233195 | t3m_01551 | COG0037        | Predicted ATPase of the PP-loop superfamily implicated in cell cycle cor | 8.00E-44 |
| 2572233195 | t3m_01551 | pfam01171      | ATP_bind_3                                                               | 1.30E-10 |
| 2572233195 | t3m_01551 | TIGR00269      | TIGR00269 family protein                                                 | 8.00E-28 |
| 2572233195 | t3m_01551 | Locus_type     | CDS                                                                      |          |
| 2572233195 | t3m_01551 | Product_name   | TIGR00269 family protein                                                 |          |
| 2572233195 | t3m_01551 | Scaffold       | t3m_contig_70_492_len_15272_read_count_1289910.42                        |          |
| 2572233195 | t3m_01551 | Coordinates    | 10867..11805(-)                                                          |          |
| 2572233195 | t3m_01551 | DNA_length     | 939bp                                                                    |          |
| 2572233195 | t3m_01551 | Protein_length | 312aa                                                                    |          |
| 2572233195 | t3m_01551 | GC             |                                                                          | 0.71     |
| 2572233196 | t3m_01552 | COG_category   | [L] Replication, recombination and repair                                |          |
| 2572233196 | t3m_01552 | COG4974        | Site-specific recombinase XerD                                           | 2.00E-48 |
| 2572233196 | t3m_01552 | pfam00589      | Phage_integrase                                                          | 9.90E-41 |
| 2572233196 | t3m_01552 | pfam13495      | Phage_int_SAM_4                                                          | 1.00E-09 |
| 2572233196 | t3m_01552 | KO:K04763      | integrase/recombinase XerD                                               | 0.00E+00 |
| 2572233196 | t3m_01552 | Locus_type     | CDS                                                                      |          |
| 2572233196 | t3m_01552 | Product_name   | Site-specific recombinase XerD                                           |          |
| 2572233196 | t3m_01552 | Scaffold       | t3m_contig_70_492_len_15272_read_count_1289910.42                        |          |
| 2572233196 | t3m_01552 | Coordinates    | 11906..12817(+)                                                          |          |
| 2572233196 | t3m_01552 | DNA_length     | 912bp                                                                    |          |
| 2572233196 | t3m_01552 | Protein_length | 303aa                                                                    |          |
| 2572233196 | t3m_01552 | GC             |                                                                          | 0.67     |
| 2572233197 | t3m_01553 | Metacyc        | CRNFORCAT-PWY: creatinine degradation I                                  |          |
| 2572233197 | t3m_01553 | Metacyc        | PWY-3661: glycine betaine degradation                                    |          |
| 2572233197 | t3m_01553 | Metacyc        | PWY-4722: creatinine degradation II                                      |          |

|            |           |                |                                                                                  |          |
|------------|-----------|----------------|----------------------------------------------------------------------------------|----------|
| 2572233197 | t3m_01553 | COG_category   | [E] Amino acid transport and metabolism                                          |          |
| 2572233197 | t3m_01553 | COG0665        | Glycine/D-amino acid oxidases (deaminating)                                      | 3.00E-39 |
| 2572233197 | t3m_01553 | pfam01266      | DAO                                                                              | 3.90E-69 |
| 2572233197 | t3m_01553 | EC:1.5.3.1     | Sarcosine oxidase.                                                               |          |
| 2572233197 | t3m_01553 | KO:K00303      | sarcosine oxidase, subunit beta [EC:1.5.3.1]                                     | 0.00E+00 |
| 2572233197 | t3m_01553 | Locus_type     | CDS                                                                              |          |
| 2572233197 | t3m_01553 | Product_name   | Glycine/D-amino acid oxidases (deaminating)                                      |          |
| 2572233197 | t3m_01553 | Scaffold       | t3m_contig_70_492_len_15272_read_count_1289910.42                                |          |
| 2572233197 | t3m_01553 | Coordinates    | 12841..14040(+)                                                                  |          |
| 2572233197 | t3m_01553 | DNA_length     | 1200bp                                                                           |          |
| 2572233197 | t3m_01553 | Protein_length | 399aa                                                                            |          |
| 2572233197 | t3m_01553 | GC             |                                                                                  | 0.72     |
|            |           |                |                                                                                  |          |
| 2572233198 | t3m_01554 | Metacyc        | PWY-1622: formaldehyde assimilation I (serine pathway)                           |          |
| 2572233198 | t3m_01554 | IMG_pathway    | 358: Conversion of glyceraldehyde to pyruvate                                    |          |
| 2572233198 | t3m_01554 | IMG_pathway    | 569: 5-dehydro-4-deoxy-D-glucarate conversion to pyruvate and 2-phosphoglycerate |          |
| 2572233198 | t3m_01554 | IMG_pathway    | 959: Serine cycle                                                                |          |
| 2572233198 | t3m_01554 | COG_category   | [G] Carbohydrate transport and metabolism                                        |          |
| 2572233198 | t3m_01554 | COG2379        | Putative glycerate kinase                                                        | 9.00E-81 |
| 2572233198 | t3m_01554 | pfam13660      | DUF4147                                                                          | 7.30E-72 |
| 2572233198 | t3m_01554 | pfam05161      | MOFRL                                                                            | 8.40E-26 |
| 2572233198 | t3m_01554 | EC:1.1.1.81    | Hydroxypyruvate reductase.                                                       |          |
| 2572233198 | t3m_01554 | KO:K00050      | hydroxypyruvate reductase [EC:1.1.1.81]                                          | 0.00E+00 |
| 2572233198 | t3m_01554 | ITERM:01510    | glycerate 2-kinase (EC 2.7.1.165)                                                |          |
| 2572233198 | t3m_01554 | Locus_type     | CDS                                                                              |          |
| 2572233198 | t3m_01554 | Product_name   | glycerate 2-kinase (EC 2.7.1.165)                                                |          |
| 2572233198 | t3m_01554 | Scaffold       | t3m_contig_70_492_len_15272_read_count_1289910.42                                |          |
| 2572233198 | t3m_01554 | Coordinates    | 14024..15271(+)                                                                  |          |
| 2572233198 | t3m_01554 | DNA_length     | 1248bp                                                                           |          |
| 2572233198 | t3m_01554 | Protein_length | 416aa                                                                            |          |
| 2572233198 | t3m_01554 | GC             |                                                                                  | 0.72     |
|            |           |                |                                                                                  |          |
| 2572233199 | t3m_01555 | Locus_type     | tRNA                                                                             |          |
| 2572233199 | t3m_01555 | Product_name   | tRNA_Gln_TTG                                                                     |          |

|            |           |              |                                                                            |           |
|------------|-----------|--------------|----------------------------------------------------------------------------|-----------|
| 2572233199 | t3m_01555 | Scaffold     | t3m_contig_70_523_len_14761_read_count_1147216.43                          |           |
| 2572233199 | t3m_01555 | Coordinates  | 1..62(-)                                                                   |           |
| 2572233199 | t3m_01555 | DNA_length   | 62bp                                                                       |           |
| 2572233199 | t3m_01555 | GC           |                                                                            | 0.65      |
| 2572233200 | t3m_01556 | KEGG_module  | M00049: Adenine ribonucleotide biosynthesis, IMP => ADP,ATP                |           |
| 2572233200 | t3m_01556 | KEGG_module  | M00002: Glycolysis, core module involving three-carbon compounds           |           |
| 2572233200 | t3m_01556 | KEGG_module  | M00001: Glycolysis (Embden-Meyerhof pathway), glucose => pyruvate          |           |
| 2572233200 | t3m_01556 | KEGG_module  | M00050: Guanine ribonucleotide biosynthesis IMP => GDP,GTP                 |           |
| 2572233200 | t3m_01556 | Metacyc      | GLYCOLYSIS: glycolysis I                                                   |           |
| 2572233200 | t3m_01556 | Metacyc      | NPGLUCAT-PWY: Entner-Doudoroff pathway II (non-phosphorylative)            |           |
| 2572233200 | t3m_01556 | Metacyc      | PWY-1042: glycolysis IV (plant cytosol)                                    |           |
| 2572233200 | t3m_01556 | Metacyc      | PWY-6901: xylose degradation IV                                            |           |
| 2572233200 | t3m_01556 | Metacyc      | PWY-2221: Entner-Doudoroff pathway III (semi-phosphorylative)              |           |
| 2572233200 | t3m_01556 | Metacyc      | P122-PWY: heterolactic fermentation                                        |           |
| 2572233200 | t3m_01556 | Metacyc      | FERMENTATION-PWY: mixed acid fermentation                                  |           |
| 2572233200 | t3m_01556 | Metacyc      | PWY-6886: 1-butanol autotrophic biosynthesis                               |           |
| 2572233200 | t3m_01556 | Metacyc      | PWY-5723: Rubisco shunt                                                    |           |
| 2572233200 | t3m_01556 | Metacyc      | P341-PWY: glycolysis V (Pyrococcus)                                        |           |
| 2572233200 | t3m_01556 | Metacyc      | PWY-6142: gluconeogenesis II (<i>Methanobacterium thermoautotrophicum</i>) |           |
| 2572233200 | t3m_01556 | Metacyc      | PWY-5484: glycolysis II (from fructose-6P)                                 |           |
| 2572233200 | t3m_01556 | Metacyc      | PWY-7003: glycerol degradation to butanol                                  |           |
| 2572233200 | t3m_01556 | Metacyc      | ANAGLYCOLYSIS-PWY: glycolysis III (glucokinase)                            |           |
| 2572233200 | t3m_01556 | Metacyc      | ANARESP1-PWY: respiration (anaerobic)                                      |           |
| 2572233200 | t3m_01556 | Metacyc      | P124-PWY: Bifidobacterium shunt                                            |           |
| 2572233200 | t3m_01556 | COG_category | [G] Carbohydrate transport and metabolism                                  |           |
| 2572233200 | t3m_01556 | COG0469      | Pyruvate kinase                                                            | 7.00E-125 |
| 2572233200 | t3m_01556 | pfam02887    | PK_C                                                                       | 2.10E-20  |
| 2572233200 | t3m_01556 | pfam00224    | PK                                                                         | 4.20E-99  |
| 2572233200 | t3m_01556 | EC:2.7.1.40  | Pyruvate kinase.                                                           |           |
| 2572233200 | t3m_01556 | TIGR01064    | pyruvate kinase                                                            | 0.00E+00  |
| 2572233200 | t3m_01556 | KO:K00873    | pyruvate kinase [EC:2.7.1.40]                                              | 0.00E+00  |
| 2572233200 | t3m_01556 | Locus_type   | CDS                                                                        |           |
| 2572233200 | t3m_01556 | Product_name | pyruvate kinase                                                            |           |

|            |           |                |                                                   |          |
|------------|-----------|----------------|---------------------------------------------------|----------|
| 2572233200 | t3m_01556 | Scaffold       | t3m_contig_70_523_len_14761_read_count_1147216.43 |          |
| 2572233200 | t3m_01556 | Coordinates    | 160..1617(+)                                      |          |
| 2572233200 | t3m_01556 | DNA_length     | 1458bp                                            |          |
| 2572233200 | t3m_01556 | Protein_length | 485aa                                             |          |
| 2572233200 | t3m_01556 | GC             |                                                   | 0.7      |
| 2572233201 | t3m_01557 | COG_category   | [P] Inorganic ion transport and metabolism        |          |
| 2572233201 | t3m_01557 | COG2223        | Nitrate/nitrite transporter                       | 9.00E-15 |
| 2572233201 | t3m_01557 | pfam07690      | MFS_1                                             | 1.00E-34 |
| 2572233201 | t3m_01557 | Locus_type     | CDS                                               |          |
| 2572233201 | t3m_01557 | Product_name   | Nitrate/nitrite transporter                       |          |
| 2572233201 | t3m_01557 | Scaffold       | t3m_contig_70_523_len_14761_read_count_1147216.43 |          |
| 2572233201 | t3m_01557 | Coordinates    | 1582..2805(-)                                     |          |
| 2572233201 | t3m_01557 | DNA_length     | 1224bp                                            |          |
| 2572233201 | t3m_01557 | Protein_length | 407aa                                             |          |
| 2572233201 | t3m_01557 | GC             |                                                   | 0.68     |
| 2572233201 | t3m_01557 | Transmembrane  | Yes                                               |          |
| 2572233202 | t3m_01558 | COG_category   | [R] General function prediction only              |          |
| 2572233202 | t3m_01558 | COG0491        | Zn-dependent hydrolases, including glyoxylases    | 3.00E-16 |
| 2572233202 | t3m_01558 | pfam00753      | Lactamase_B                                       | 1.30E-22 |
| 2572233202 | t3m_01558 | Locus_type     | CDS                                               |          |
| 2572233202 | t3m_01558 | Product_name   | Zn-dependent hydrolases, including glyoxylases    |          |
| 2572233202 | t3m_01558 | Scaffold       | t3m_contig_70_523_len_14761_read_count_1147216.43 |          |
| 2572233202 | t3m_01558 | Coordinates    | 2802..3743(-)                                     |          |
| 2572233202 | t3m_01558 | DNA_length     | 942bp                                             |          |
| 2572233202 | t3m_01558 | Protein_length | 313aa                                             |          |
| 2572233202 | t3m_01558 | GC             |                                                   | 0.7      |
| 2572233203 | t3m_01559 | COG_category   | [R] General function prediction only              |          |
| 2572233203 | t3m_01559 | COG1994        | Zn-dependent proteases                            | 8.00E-10 |
| 2572233203 | t3m_01559 | pfam02163      | Peptidase_M50                                     | 1.00E-14 |
| 2572233203 | t3m_01559 | Locus_type     | CDS                                               |          |
| 2572233203 | t3m_01559 | Product_name   | Zn-dependent proteases                            |          |

|            |           |                |                                                                                |          |
|------------|-----------|----------------|--------------------------------------------------------------------------------|----------|
| 2572233203 | t3m_01559 | Scaffold       | t3m_contig_70_523_len_14761_read_count_1147216.43                              |          |
| 2572233203 | t3m_01559 | Coordinates    | 3754..4467(-)                                                                  |          |
| 2572233203 | t3m_01559 | DNA_length     | 714bp                                                                          |          |
| 2572233203 | t3m_01559 | Protein_length | 237aa                                                                          |          |
| 2572233203 | t3m_01559 | GC             |                                                                                | 0.67     |
| 2572233203 | t3m_01559 | Transmembrane  | Yes                                                                            |          |
|            |           |                |                                                                                |          |
| 2572233204 | t3m_01560 | KEGG_module    | M00240: Iron complex transport system                                          |          |
| 2572233204 | t3m_01560 | COG_category   | [P] Inorganic ion transport and metabolism                                     |          |
| 2572233204 | t3m_01560 | COG0614        | ABC-type Fe <sup>3+</sup> -hydroxamate transport system, periplasmic component | 2.00E-12 |
| 2572233204 | t3m_01560 | pfam01497      | Peripla_BP_2                                                                   | 7.90E-19 |
| 2572233204 | t3m_01560 | KO:K02016      | iron complex transport system substrate-binding protein                        | 0.00E+00 |
| 2572233204 | t3m_01560 | Locus_type     | CDS                                                                            |          |
| 2572233204 | t3m_01560 | Product_name   | ABC-type Fe <sup>3+</sup> -hydroxamate transport system, periplasmic component |          |
| 2572233204 | t3m_01560 | Scaffold       | t3m_contig_70_523_len_14761_read_count_1147216.43                              |          |
| 2572233204 | t3m_01560 | Coordinates    | 4464..5369(-)                                                                  |          |
| 2572233204 | t3m_01560 | DNA_length     | 906bp                                                                          |          |
| 2572233204 | t3m_01560 | Protein_length | 301aa                                                                          |          |
| 2572233204 | t3m_01560 | GC             |                                                                                | 0.7      |
|            |           |                |                                                                                |          |
| 2572233205 | t3m_01561 | Locus_type     | CDS                                                                            |          |
| 2572233205 | t3m_01561 | Product_name   | hypothetical protein                                                           |          |
| 2572233205 | t3m_01561 | Scaffold       | t3m_contig_70_523_len_14761_read_count_1147216.43                              |          |
| 2572233205 | t3m_01561 | Coordinates    | 5403..6530(-)                                                                  |          |
| 2572233205 | t3m_01561 | DNA_length     | 1128bp                                                                         |          |
| 2572233205 | t3m_01561 | Protein_length | 375aa                                                                          |          |
| 2572233205 | t3m_01561 | GC             |                                                                                | 0.7      |
|            |           |                |                                                                                |          |
| 2572233206 | t3m_01562 | KEGG_module    | M00365: C10-C20 isoprenoid biosynthesis, archaea                               |          |
| 2572233206 | t3m_01562 | KEGG_module    | M00364: C10-C20 isoprenoid biosynthesis, bacteria                              |          |
| 2572233206 | t3m_01562 | Metacyc        | PWY-7182: linalool biosynthesis I                                              |          |
| 2572233206 | t3m_01562 | Metacyc        | PWY20L-4: superpathway of linalool biosynthesis                                |          |
| 2572233206 | t3m_01562 | Metacyc        | PWY-6859: <i>all-trans</i>-farnesol biosynthesis                               |          |
| 2572233206 | t3m_01562 | Metacyc        | PWY-7102: bisabolene biosynthesis                                              |          |



|            |           |                |                                                                                |          |
|------------|-----------|----------------|--------------------------------------------------------------------------------|----------|
| 2572233206 | t3m_01562 | Metacyc        | PWY-6383: mono-<i>trans</i>, poly-<i>cis</i> decaprenyl phosphate biosynthesis |          |
| 2572233206 | t3m_01562 | Metacyc        | PWY-6691: plaunotol biosynthesis                                               |          |
| 2572233206 | t3m_01562 | Metacyc        | PWY-7141: linalool biosynthesis II                                             |          |
| 2572233206 | t3m_01562 | Metacyc        | PWY-5122: geranyl diphosphate biosynthesis                                     |          |
| 2572233206 | t3m_01562 | Metacyc        | PWY-6659: fusicoccins biosynthesis                                             |          |
| 2572233206 | t3m_01562 | Metacyc        | PWY-5120: geranylgeranyldiphosphate biosynthesis                               |          |
| 2572233206 | t3m_01562 | Metacyc        | PWY-5123: <i>trans, trans</i>-farnesyl diphosphate biosynthesis                |          |
| 2572233206 | t3m_01562 | COG_category   | [H] Coenzyme transport and metabolism                                          |          |
| 2572233206 | t3m_01562 | COG0142        | Geranylgeranyl pyrophosphate synthase                                          | 8.00E-40 |
| 2572233206 | t3m_01562 | pfam00348      | polyprenyl_synt                                                                | 1.40E-17 |
| 2572233206 | t3m_01562 | pfam00348      | polyprenyl_synt                                                                | 1.30E-12 |
| 2572233206 | t3m_01562 | EC:2.5.1.29    | Geranylgeranyl diphosphate synthase.                                           |          |
| 2572233206 | t3m_01562 | EC:2.5.1.1     | Dimethylallyltranstransferase.                                                 |          |
| 2572233206 | t3m_01562 | EC:2.5.1.10    | (2E,6E)-farnesyl diphosphate synthase.                                         |          |
| 2572233206 | t3m_01562 | KO:K13787      | geranylgeranyl diphosphate synthase, type I [EC:2.5.1.1 2.5.1.10 2.5.1.2       | 0.00E+00 |
| 2572233206 | t3m_01562 | Locus_type     | CDS                                                                            |          |
| 2572233206 | t3m_01562 | Product_name   | Geranylgeranyl pyrophosphate synthase                                          |          |
| 2572233206 | t3m_01562 | Scaffold       | t3m_contig_70_523_len_14761_read_count_1147216.43                              |          |
| 2572233206 | t3m_01562 | Coordinates    | 6586..7647(+)                                                                  |          |
| 2572233206 | t3m_01562 | DNA_length     | 1062bp                                                                         |          |
| 2572233206 | t3m_01562 | Protein_length | 353aa                                                                          |          |
| 2572233206 | t3m_01562 | GC             |                                                                                | 0.68     |
| 2572233207 | t3m_01563 | COG_category   | [O] Posttranslational modification, protein turnover, chaperones               |          |
| 2572233207 | t3m_01563 | COG1382        | Prefoldin, chaperonin cofactor                                                 | 1.00E-13 |
| 2572233207 | t3m_01563 | pfam01920      | Prefoldin_2                                                                    | 1.30E-21 |
| 2572233207 | t3m_01563 | TIGR02338      | prefoldin, beta subunit, archaeal                                              | 1.10E-33 |
| 2572233207 | t3m_01563 | KO:K04798      | prefoldin beta subunit                                                         | 9.90E-19 |
| 2572233207 | t3m_01563 | Locus_type     | CDS                                                                            |          |
| 2572233207 | t3m_01563 | Product_name   | prefoldin, beta subunit, archaeal                                              |          |
| 2572233207 | t3m_01563 | Scaffold       | t3m_contig_70_523_len_14761_read_count_1147216.43                              |          |
| 2572233207 | t3m_01563 | Coordinates    | 7670..8068(-)                                                                  |          |
| 2572233207 | t3m_01563 | DNA_length     | 399bp                                                                          |          |
| 2572233207 | t3m_01563 | Protein_length | 132aa                                                                          |          |

|            |           |                |                                                                     |           |
|------------|-----------|----------------|---------------------------------------------------------------------|-----------|
| 2572233207 | t3m_01563 | GC             |                                                                     | 0.65      |
| 2572233208 | t3m_01564 | pfam09341      | Pcc1                                                                | 9.60E-09  |
| 2572233208 | t3m_01564 | KO:K09741      | hypothetical protein                                                | 6.50E-06  |
| 2572233208 | t3m_01564 | Locus_type     | CDS                                                                 |           |
| 2572233208 | t3m_01564 | Product_name   | Transcription factor Pcc1                                           |           |
| 2572233208 | t3m_01564 | Scaffold       | t3m_contig_70_523_len_14761_read_count_1147216.43                   |           |
| 2572233208 | t3m_01564 | Coordinates    | 8128..8397(-)                                                       |           |
| 2572233208 | t3m_01564 | DNA_length     | 270bp                                                               |           |
| 2572233208 | t3m_01564 | Protein_length | 89aa                                                                |           |
| 2572233208 | t3m_01564 | GC             |                                                                     | 0.7       |
| 2572233209 | t3m_01565 | KEGG_module    | M00048: Inosine monophosphate biosynthesis, PRPP + glutamine => IMP |           |
| 2572233209 | t3m_01565 | KEGG_module    | M00049: Adenine ribonucleotide biosynthesis, IMP => ADP,ATP         |           |
| 2572233209 | t3m_01565 | Metacyc        | PWY-6124: inosine-5'-phosphate biosynthesis II                      |           |
| 2572233209 | t3m_01565 | Metacyc        | PWY-6123: inosine-5'-phosphate biosynthesis I                       |           |
| 2572233209 | t3m_01565 | Metacyc        | PWY-841: purine nucleotides <i>de novo</i> biosynthesis II          |           |
| 2572233209 | t3m_01565 | Metacyc        | PWY-6126: adenosine nucleotides <i>de novo</i> biosynthesis         |           |
| 2572233209 | t3m_01565 | COG_category   | [F] Nucleotide transport and metabolism                             |           |
| 2572233209 | t3m_01565 | COG0015        | Adenylosuccinate lyase                                              | 6.00E-117 |
| 2572233209 | t3m_01565 | pfam10397      | ADSL_C                                                              | 1.90E-14  |
| 2572233209 | t3m_01565 | pfam00206      | Lyase_1                                                             | 1.30E-48  |
| 2572233209 | t3m_01565 | EC:4.3.2.2     | Adenylosuccinate lyase.                                             |           |
| 2572233209 | t3m_01565 | TIGR00928      | adenylosuccinate lyase                                              | 0.00E+00  |
| 2572233209 | t3m_01565 | KO:K01756      | adenylosuccinate lyase [EC:4.3.2.2]                                 | 0.00E+00  |
| 2572233209 | t3m_01565 | Locus_type     | CDS                                                                 |           |
| 2572233209 | t3m_01565 | Product_name   | adenylosuccinate lyase                                              |           |
| 2572233209 | t3m_01565 | Scaffold       | t3m_contig_70_523_len_14761_read_count_1147216.43                   |           |
| 2572233209 | t3m_01565 | Coordinates    | 8394..9761(-)                                                       |           |
| 2572233209 | t3m_01565 | DNA_length     | 1368bp                                                              |           |
| 2572233209 | t3m_01565 | Protein_length | 455aa                                                               |           |
| 2572233209 | t3m_01565 | GC             |                                                                     | 0.7       |
| 2572233210 | t3m_01566 | Metacyc        | CITRULLINE-DEG-PWY: citrulline degradation                          |           |

|            |           |                |                                                                                |           |
|------------|-----------|----------------|--------------------------------------------------------------------------------|-----------|
| 2572233210 | t3m_01566 | Metacyc        | PWY0-41: allantoin degradation IV (anaerobic)                                  |           |
| 2572233210 | t3m_01566 | IMG_pathway    | 184: L-arginine degradation by Arg deiminase pathway                           |           |
| 2572233210 | t3m_01566 | COG_category   | [E] Amino acid transport and metabolism                                        |           |
| 2572233210 | t3m_01566 | COG0549        | Carbamate kinase                                                               | 9.00E-92  |
| 2572233210 | t3m_01566 | pfam00696      | AA_kinase                                                                      | 7.30E-21  |
| 2572233210 | t3m_01566 | EC:2.7.2.2     | Carbamate kinase.                                                              |           |
| 2572233210 | t3m_01566 | TIGR00746      | carbamate kinase                                                               | 4.00E-101 |
| 2572233210 | t3m_01566 | KO:K00926      | carbamate kinase [EC:2.7.2.2]                                                  | 0.00E+00  |
| 2572233210 | t3m_01566 | ITERM:00506    | carbamate kinase (EC 2.7.2.2)                                                  |           |
| 2572233210 | t3m_01566 | Locus_type     | CDS                                                                            |           |
| 2572233210 | t3m_01566 | Product_name   | carbamate kinase (EC 2.7.2.2)                                                  |           |
| 2572233210 | t3m_01566 | Scaffold       | t3m_contig_70_523_len_14761_read_count_1147216.43                              |           |
| 2572233210 | t3m_01566 | Coordinates    | 9881..10834(+)                                                                 |           |
| 2572233210 | t3m_01566 | DNA_length     | 954bp                                                                          |           |
| 2572233210 | t3m_01566 | Protein_length | 317aa                                                                          |           |
| 2572233210 | t3m_01566 | GC             |                                                                                | 0.71      |
|            |           |                |                                                                                |           |
| 2572233211 | t3m_01567 | Metacyc        | ASPARAGINE-BIOSYNTHESIS: asparagine biosynthesis I                             |           |
| 2572233211 | t3m_01567 | pfam00733      | Asn_synthase                                                                   | 2.30E-21  |
| 2572233211 | t3m_01567 | EC:6.3.5.4     | Asparagine synthase (glutamine-hydrolyzing).                                   |           |
| 2572233211 | t3m_01567 | KO:K01953      | asparagine synthase (glutamine-hydrolysing) [EC:6.3.5.4]                       | 9.80E-23  |
| 2572233211 | t3m_01567 | Locus_type     | CDS                                                                            |           |
| 2572233211 | t3m_01567 | Product_name   | Asparagine synthase                                                            |           |
| 2572233211 | t3m_01567 | Scaffold       | t3m_contig_70_523_len_14761_read_count_1147216.43                              |           |
| 2572233211 | t3m_01567 | Coordinates    | 10831..11595(-)                                                                |           |
| 2572233211 | t3m_01567 | DNA_length     | 765bp                                                                          |           |
| 2572233211 | t3m_01567 | Protein_length | 254aa                                                                          |           |
| 2572233211 | t3m_01567 | GC             |                                                                                | 0.69      |
|            |           |                |                                                                                |           |
| 2572233212 | t3m_01568 | KEGG_module    | M00064: ADP-L-glycero-D-manno-heptose biosynthesis                             |           |
| 2572233212 | t3m_01568 | Metacyc        | PWY0-1241: ADP-L- <i>glycero</i> -&beta;-D- <i>manno</i> -heptose biosynthesis |           |
| 2572233212 | t3m_01568 | Metacyc        | PWY-6478: GDP-D- <i>glycero</i> -&alpha;-D- <i>manno</i> -heptose biosynthesis |           |
| 2572233212 | t3m_01568 | COG_category   | [E] Amino acid transport and metabolism                                        |           |
| 2572233212 | t3m_01568 | COG0241        | Histidinol phosphatase and related phosphatases                                | 8.00E-37  |

|            |           |                |                                                                     |  |          |
|------------|-----------|----------------|---------------------------------------------------------------------|--|----------|
| 2572233212 | t3m_01568 | pfam13242      | Hydrolase_like                                                      |  | 2.10E-07 |
| 2572233212 | t3m_01568 | EC:3.1.3.82    | D-glycero-beta-D-manno-heptose 1,7-bisphosphate 7-phosphatase.      |  |          |
| 2572233212 | t3m_01568 | EC:3.1.3.83    | D-glycero-alpha-D-manno-heptose-1,7-bisphosphate 7-phosphatase.     |  |          |
| 2572233212 | t3m_01568 | TIGR01662      | HAD-superfamily hydrolase, subfamily IIIA                           |  | 1.40E-33 |
| 2572233212 | t3m_01568 | TIGR01656      | histidinol-phosphate phosphatase family domain                      |  | 1.20E-36 |
| 2572233212 | t3m_01568 | TIGR00213      | D,D-heptose 1,7-bisphosphate phosphatase                            |  | 1.00E-38 |
| 2572233212 | t3m_01568 | KO:K03273      | D-glycero-D-manno-heptose 1,7-bisphosphate phosphatase [EC:3.1.3.8] |  | 6.70E-37 |
| 2572233212 | t3m_01568 | Locus_type     | CDS                                                                 |  |          |
| 2572233212 | t3m_01568 | Product_name   | histidinol-phosphate phosphatase family domain/HAD-superfamily hydr |  |          |
| 2572233212 | t3m_01568 | Scaffold       | t3m_contig_70_523_len_14761_read_count_1147216.43                   |  |          |
| 2572233212 | t3m_01568 | Coordinates    | 11620..12243(+)                                                     |  |          |
| 2572233212 | t3m_01568 | DNA_length     | 624bp                                                               |  |          |
| 2572233212 | t3m_01568 | Protein_length | 207aa                                                               |  |          |
| 2572233212 | t3m_01568 | GC             |                                                                     |  | 0.68     |
| 2572233213 | t3m_01569 | COG_category   | [S] Function unknown                                                |  |          |
| 2572233213 | t3m_01569 | COG1836        | Predicted membrane protein                                          |  | 2.00E-27 |
| 2572233213 | t3m_01569 | pfam01940      | DUF92                                                               |  | 6.70E-44 |
| 2572233213 | t3m_01569 | TIGR00297      | TIGR00297 family protein                                            |  | 2.00E-41 |
| 2572233213 | t3m_01569 | Locus_type     | CDS                                                                 |  |          |
| 2572233213 | t3m_01569 | Product_name   | Predicted membrane protein                                          |  |          |
| 2572233213 | t3m_01569 | Scaffold       | t3m_contig_70_523_len_14761_read_count_1147216.43                   |  |          |
| 2572233213 | t3m_01569 | Coordinates    | 12318..13076(+)                                                     |  |          |
| 2572233213 | t3m_01569 | DNA_length     | 759bp                                                               |  |          |
| 2572233213 | t3m_01569 | Protein_length | 252aa                                                               |  |          |
| 2572233213 | t3m_01569 | GC             |                                                                     |  | 0.69     |
| 2572233213 | t3m_01569 | Transmembrane  | Yes                                                                 |  |          |
| 2572233214 | t3m_01570 | COG_category   | [R] General function prediction only                                |  |          |
| 2572233214 | t3m_01570 | COG0603        | Predicted PP-loop superfamily ATPase                                |  | 1.00E-66 |
| 2572233214 | t3m_01570 | pfam06508      | QueC                                                                |  | 2.10E-69 |
| 2572233214 | t3m_01570 | TIGR00364      | queuosine biosynthesis protein QueC                                 |  | 9.50E-63 |
| 2572233214 | t3m_01570 | KO:K06920      | queuosine biosynthesis protein QueC                                 |  | 0.00E+00 |
| 2572233214 | t3m_01570 | ITERM:05501    | preQ(0) biosynthesis protein QueC                                   |  |          |

|            |           |                |                                                    |          |
|------------|-----------|----------------|----------------------------------------------------|----------|
| 2572233214 | t3m_01570 | Locus_type     | CDS                                                |          |
| 2572233214 | t3m_01570 | Product_name   | preQ(0) biosynthesis protein QueC                  |          |
| 2572233214 | t3m_01570 | Scaffold       | t3m_contig_70_523_len_14761_read_count_1147216.43  |          |
| 2572233214 | t3m_01570 | Coordinates    | 13073..13765(+)                                    |          |
| 2572233214 | t3m_01570 | DNA_length     | 693bp                                              |          |
| 2572233214 | t3m_01570 | Protein_length | 230aa                                              |          |
| 2572233214 | t3m_01570 | GC             |                                                    | 0.72     |
|            |           |                |                                                    |          |
| 2572233215 | t3m_01571 | COG_category   | [M] Cell wall/membrane/envelope biogenesis         |          |
| 2572233215 | t3m_01571 | COG1970        | Large-conductance mechanosensitive channel         | 2.00E-14 |
| 2572233215 | t3m_01571 | pfam01741      | MscL                                               | 1.30E-18 |
| 2572233215 | t3m_01571 | TIGR00220      | large conductance mechanosensitive channel protein | 6.90E-19 |
| 2572233215 | t3m_01571 | KO:K03282      | large conductance mechanosensitive channel         | 1.10E-25 |
| 2572233215 | t3m_01571 | Locus_type     | CDS                                                |          |
| 2572233215 | t3m_01571 | Product_name   | Large-conductance mechanosensitive channel         |          |
| 2572233215 | t3m_01571 | Scaffold       | t3m_contig_70_523_len_14761_read_count_1147216.43  |          |
| 2572233215 | t3m_01571 | Coordinates    | 13762..14196(-)                                    |          |
| 2572233215 | t3m_01571 | DNA_length     | 435bp                                              |          |
| 2572233215 | t3m_01571 | Protein_length | 144aa                                              |          |
| 2572233215 | t3m_01571 | GC             |                                                    | 0.63     |
| 2572233215 | t3m_01571 | Transmembrane  | Yes                                                |          |
|            |           |                |                                                    |          |
| 2572233216 | t3m_01572 | pfam05746      | DALR_1                                             | 1.70E-30 |
| 2572233216 | t3m_01572 | Locus_type     | CDS                                                |          |
| 2572233216 | t3m_01572 | Product_name   | DALR anticodon binding domain                      |          |
| 2572233216 | t3m_01572 | Scaffold       | t3m_contig_70_523_len_14761_read_count_1147216.43  |          |
| 2572233216 | t3m_01572 | Coordinates    | 14326..14760(-)                                    |          |
| 2572233216 | t3m_01572 | DNA_length     | 435bp                                              |          |
| 2572233216 | t3m_01572 | Protein_length | 144aa                                              |          |
| 2572233216 | t3m_01572 | GC             |                                                    | 0.7      |
|            |           |                |                                                    |          |
| 2572233217 | t3m_01573 | Locus_type     | CDS                                                |          |
| 2572233217 | t3m_01573 | Product_name   | hypothetical protein                               |          |
| 2572233217 | t3m_01573 | Scaffold       | t3m_contig_70_566_len_14045_read_count_1043208.44  |          |

|            |           |                |                                                                   |           |
|------------|-----------|----------------|-------------------------------------------------------------------|-----------|
| 2572233217 | t3m_01573 | Coordinates    | 3..236(-)                                                         |           |
| 2572233217 | t3m_01573 | DNA_length     | 234bp                                                             |           |
| 2572233217 | t3m_01573 | Protein_length | 78aa                                                              |           |
| 2572233217 | t3m_01573 | GC             |                                                                   | 0.68      |
| 2572233218 | t3m_01575 | Metacyc        | PWY-6935: seleno-amino acid detoxification and volatilization II  |           |
| 2572233218 | t3m_01575 | Metacyc        | PWY1A0-6325: actinorhodin biosynthesis                            |           |
| 2572233218 | t3m_01575 | COG_category   | [H] Coenzyme transport and metabolism                             |           |
| 2572233218 | t3m_01575 | COG0214        | Pyridoxine biosynthesis enzyme                                    | 1.00E-121 |
| 2572233218 | t3m_01575 | pfam01680      | SOR_SNZ                                                           | 4.50E-102 |
| 2572233218 | t3m_01575 | EC:4.-         | Lyases.                                                           |           |
| 2572233218 | t3m_01575 | TIGR00343      | pyridoxal 5'-phosphate synthase, synthase subunit Pdx1            | 0.00E+00  |
| 2572233218 | t3m_01575 | KO:K06215      | pyridoxine biosynthesis protein [EC:4.-.-.]                       | 0.00E+00  |
| 2572233218 | t3m_01575 | Locus_type     | CDS                                                               |           |
| 2572233218 | t3m_01575 | Product_name   | pyridoxal phosphate synthase yaaD subunit                         |           |
| 2572233218 | t3m_01575 | Scaffold       | t3m_contig_70_566_len_14045_read_count_1043208.44                 |           |
| 2572233218 | t3m_01575 | Coordinates    | 537..1481(+)                                                      |           |
| 2572233218 | t3m_01575 | DNA_length     | 945bp                                                             |           |
| 2572233218 | t3m_01575 | Protein_length | 314aa                                                             |           |
| 2572233218 | t3m_01575 | GC             |                                                                   | 0.68      |
| 2572233219 | t3m_01576 | COG_category   | [M] Cell wall/membrane/envelope biogenesis                        |           |
| 2572233219 | t3m_01576 | COG0438        | Glycosyltransferase                                               | 7.00E-44  |
| 2572233219 | t3m_01576 | pfam00534      | Glycos_transf_1                                                   | 1.00E-37  |
| 2572233219 | t3m_01576 | pfam13579      | Glyco_trans_4_4                                                   | 9.30E-18  |
| 2572233219 | t3m_01576 | EC:2.4.1.87    | N-acetyllactosaminide 3-alpha-galactosyltransferase.              |           |
| 2572233219 | t3m_01576 | KO:K00743      | N-acetyllactosaminide 3-alpha-galactosyltransferase [EC:2.4.1.87] | 0.00E+00  |
| 2572233219 | t3m_01576 | Locus_type     | CDS                                                               |           |
| 2572233219 | t3m_01576 | Product_name   | Glycosyltransferase                                               |           |
| 2572233219 | t3m_01576 | Scaffold       | t3m_contig_70_566_len_14045_read_count_1043208.44                 |           |
| 2572233219 | t3m_01576 | Coordinates    | 1541..2674(+)                                                     |           |
| 2572233219 | t3m_01576 | DNA_length     | 1134bp                                                            |           |
| 2572233219 | t3m_01576 | Protein_length | 377aa                                                             |           |
| 2572233219 | t3m_01576 | GC             |                                                                   | 0.7       |

|            |           |                |                                                                          |          |
|------------|-----------|----------------|--------------------------------------------------------------------------|----------|
| 2572233220 | t3m_01577 | KEGG_module    | M00051: Uridine monophosphate biosynthesis, glutamine (+ PRPP) => UMP    |          |
| 2572233220 | t3m_01577 | Metacyc        | PWY-5686: UMP biosynthesis                                               |          |
| 2572233220 | t3m_01577 | IMG_pathway    | 321: Uridine 5'-monophosphate biosynthesis                               |          |
| 2572233220 | t3m_01577 | COG_category   | [F] Nucleotide transport and metabolism                                  |          |
| 2572233220 | t3m_01577 | COG0284        | Orotidine-5'-phosphate decarboxylase                                     | 4.00E-19 |
| 2572233220 | t3m_01577 | pfam00215      | OMPdecase                                                                | 5.20E-21 |
| 2572233220 | t3m_01577 | EC:4.1.1.23    | Orotidine-5'-phosphate decarboxylase.                                    |          |
| 2572233220 | t3m_01577 | TIGR02127      | orotidine 5'-phosphate decarboxylase, subfamily 2                        | 1.10E-55 |
| 2572233220 | t3m_01577 | KO:K01591      | orotidine-5'-phosphate decarboxylase [EC:4.1.1.23]                       | 2.80E-45 |
| 2572233220 | t3m_01577 | ITERM:01394    | orotidine-5'-phosphate decarboxylase (EC 4.1.1.23)                       |          |
| 2572233220 | t3m_01577 | Locus_type     | CDS                                                                      |          |
| 2572233220 | t3m_01577 | Product_name   | orotidine-5'-phosphate decarboxylase (EC 4.1.1.23)                       |          |
| 2572233220 | t3m_01577 | Scaffold       | t3m_contig_70_566_len_14045_read_count_1043208.44                        |          |
| 2572233220 | t3m_01577 | Coordinates    | 2640..3482(-)                                                            |          |
| 2572233220 | t3m_01577 | DNA_length     | 843bp                                                                    |          |
| 2572233220 | t3m_01577 | Protein_length | 280aa                                                                    |          |
| 2572233220 | t3m_01577 | GC             |                                                                          | 0.68     |
| 2572233221 | t3m_01578 | KEGG_module    | M00288: RPA complex                                                      |          |
| 2572233221 | t3m_01578 | COG_category   | [L] Replication, recombination and repair                                |          |
| 2572233221 | t3m_01578 | COG1599        | Single-stranded DNA-binding replication protein A (RPA), large (70 kD) s | 2.00E-22 |
| 2572233221 | t3m_01578 | KO:K07466      | replication factor A1                                                    | 0.00E+00 |
| 2572233221 | t3m_01578 | Locus_type     | CDS                                                                      |          |
| 2572233221 | t3m_01578 | Product_name   | Single-stranded DNA-binding replication protein A (RPA), large (70 kD) s |          |
| 2572233221 | t3m_01578 | Scaffold       | t3m_contig_70_566_len_14045_read_count_1043208.44                        |          |
| 2572233221 | t3m_01578 | Coordinates    | 3624..4814(+)                                                            |          |
| 2572233221 | t3m_01578 | DNA_length     | 1191bp                                                                   |          |
| 2572233221 | t3m_01578 | Protein_length | 396aa                                                                    |          |
| 2572233221 | t3m_01578 | GC             |                                                                          | 0.71     |
| 2572233222 | t3m_01579 | COG_category   | [S] Function unknown                                                     |          |
| 2572233222 | t3m_01579 | COG3390        | Uncharacterized protein conserved in archaea                             | 1.00E-21 |
| 2572233222 | t3m_01579 | KO:K09746      | hypothetical protein                                                     | 7.60E-22 |

|            |           |                |                                      |                                                   |          |
|------------|-----------|----------------|--------------------------------------|---------------------------------------------------|----------|
| 2572233222 | t3m_01579 | Locus_type     |                                      | CDS                                               |          |
| 2572233222 | t3m_01579 | Product_name   |                                      | Uncharacterized protein conserved in archaea      |          |
| 2572233222 | t3m_01579 | Scaffold       |                                      | t3m_contig_70_566_len_14045_read_count_1043208.44 |          |
| 2572233222 | t3m_01579 | Coordinates    |                                      | 4814..5734(+)                                     |          |
| 2572233222 | t3m_01579 | DNA_length     |                                      | 921bp                                             |          |
| 2572233222 | t3m_01579 | Protein_length |                                      | 306aa                                             |          |
| 2572233222 | t3m_01579 | GC             |                                      |                                                   | 0.73     |
|            |           |                |                                      |                                                   |          |
| 2572233223 | t3m_01580 | pfam00254      | FKBP_C                               |                                                   | 1.10E-05 |
| 2572233223 | t3m_01580 | Locus_type     |                                      | CDS                                               |          |
| 2572233223 | t3m_01580 | Product_name   |                                      | FKBP-type peptidyl-prolyl cis-trans isomerase     |          |
| 2572233223 | t3m_01580 | Scaffold       |                                      | t3m_contig_70_566_len_14045_read_count_1043208.44 |          |
| 2572233223 | t3m_01580 | Coordinates    |                                      | 5862..6785(+)                                     |          |
| 2572233223 | t3m_01580 | DNA_length     |                                      | 924bp                                             |          |
| 2572233223 | t3m_01580 | Protein_length |                                      | 307aa                                             |          |
| 2572233223 | t3m_01580 | GC             |                                      |                                                   | 0.66     |
| 2572233223 | t3m_01580 | Transmembrane  |                                      | Yes                                               |          |
|            |           |                |                                      |                                                   |          |
| 2572233224 | t3m_01581 | Locus_type     |                                      | CDS                                               |          |
| 2572233224 | t3m_01581 | Product_name   |                                      | hypothetical protein                              |          |
| 2572233224 | t3m_01581 | Scaffold       |                                      | t3m_contig_70_566_len_14045_read_count_1043208.44 |          |
| 2572233224 | t3m_01581 | Coordinates    |                                      | 6793..7695(-)                                     |          |
| 2572233224 | t3m_01581 | DNA_length     |                                      | 903bp                                             |          |
| 2572233224 | t3m_01581 | Protein_length |                                      | 300aa                                             |          |
| 2572233224 | t3m_01581 | GC             |                                      |                                                   | 0.7      |
|            |           |                |                                      |                                                   |          |
| 2572233225 | t3m_01582 | COG_category   | [R] General function prediction only |                                                   |          |
| 2572233225 | t3m_01582 | COG1691        | NCAIR mutase (PurE)-related proteins |                                                   | 5.00E-53 |
| 2572233225 | t3m_01582 | pfam00731      | AIRC                                 |                                                   | 2.40E-22 |
| 2572233225 | t3m_01582 | Locus_type     |                                      | CDS                                               |          |
| 2572233225 | t3m_01582 | Product_name   |                                      | NCAIR mutase (PurE)-related proteins              |          |
| 2572233225 | t3m_01582 | Scaffold       |                                      | t3m_contig_70_566_len_14045_read_count_1043208.44 |          |
| 2572233225 | t3m_01582 | Coordinates    |                                      | 7777..8556(-)                                     |          |
| 2572233225 | t3m_01582 | DNA_length     |                                      | 780bp                                             |          |



|            |           |                |                                                                    |          |
|------------|-----------|----------------|--------------------------------------------------------------------|----------|
| 2572233225 | t3m_01582 | Protein_length | 259aa                                                              |          |
| 2572233225 | t3m_01582 | GC             |                                                                    | 0.72     |
| 2572233226 | t3m_01583 | KEGG_module    | M00036: Leucine degradation, leucine => acetoacetate + acetyl-CoA  |          |
| 2572233226 | t3m_01583 | KEGG_module    | M00013: Malonate semialdehyde pathway, propanoyl-CoA => Acetyl-CoA |          |
| 2572233226 | t3m_01583 | KEGG_module    | M00087: beta-Oxidation                                             |          |
| 2572233226 | t3m_01583 | Metacyc        | PWY-7094: fatty acid salvage                                       |          |
| 2572233226 | t3m_01583 | COG_category   | [I] Lipid transport and metabolism                                 |          |
| 2572233226 | t3m_01583 | COG1960        | Acyl-CoA dehydrogenases                                            | 4.00E-98 |
| 2572233226 | t3m_01583 | pfam00441      | Acyl-CoA_dh_1                                                      | 3.10E-51 |
| 2572233226 | t3m_01583 | pfam02771      | Acyl-CoA_dh_N                                                      | 4.50E-31 |
| 2572233226 | t3m_01583 | pfam02770      | Acyl-CoA_dh_M                                                      | 2.50E-22 |
| 2572233226 | t3m_01583 | EC:1.3.8.7     | Medium-chain acyl-CoA dehydrogenase.                               |          |
| 2572233226 | t3m_01583 | KO:K00249      | acyl-CoA dehydrogenase [EC:1.3.8.7]                                | 0.00E+00 |
| 2572233226 | t3m_01583 | Locus_type     | CDS                                                                |          |
| 2572233226 | t3m_01583 | Product_name   | Acyl-CoA dehydrogenases                                            |          |
| 2572233226 | t3m_01583 | Scaffold       | t3m_contig_70_566_len_14045_read_count_1043208.44                  |          |
| 2572233226 | t3m_01583 | Coordinates    | 8605..9753(+)                                                      |          |
| 2572233226 | t3m_01583 | DNA_length     | 1149bp                                                             |          |
| 2572233226 | t3m_01583 | Protein_length | 382aa                                                              |          |
| 2572233226 | t3m_01583 | GC             |                                                                    | 0.67     |
| 2572233227 | t3m_01584 | COG_category   | [C] Energy production and conversion                               |          |
| 2572233227 | t3m_01584 | COG2086        | Electron transfer flavoprotein, beta subunit                       | 7.00E-41 |
| 2572233227 | t3m_01584 | pfam01012      | ETF                                                                | 4.20E-27 |
| 2572233227 | t3m_01584 | KO:K03521      | electron transfer flavoprotein beta subunit                        | 7.30E-41 |
| 2572233227 | t3m_01584 | ITERM:01639    | electron transfer flavoprotein beta subunit                        |          |
| 2572233227 | t3m_01584 | Locus_type     | CDS                                                                |          |
| 2572233227 | t3m_01584 | Product_name   | electron transfer flavoprotein beta subunit                        |          |
| 2572233227 | t3m_01584 | Scaffold       | t3m_contig_70_566_len_14045_read_count_1043208.44                  |          |
| 2572233227 | t3m_01584 | Coordinates    | 9768..10550(+)                                                     |          |
| 2572233227 | t3m_01584 | DNA_length     | 783bp                                                              |          |
| 2572233227 | t3m_01584 | Protein_length | 260aa                                                              |          |
| 2572233227 | t3m_01584 | GC             |                                                                    | 0.69     |

|            |           |                |                                                                                                |          |
|------------|-----------|----------------|------------------------------------------------------------------------------------------------|----------|
| 2572233228 | t3m_01585 | COG_category   | [C] Energy production and conversion                                                           |          |
| 2572233228 | t3m_01585 | COG0205        | Electron transfer flavoprotein, alpha subunit                                                  | 2.00E-65 |
| 2572233228 | t3m_01585 | pfam01012      | ETF                                                                                            | 1.80E-22 |
| 2572233228 | t3m_01585 | pfam00766      | ETF_alpha                                                                                      | 9.60E-34 |
| 2572233228 | t3m_01585 | KO:K03522      | electron transfer flavoprotein alpha subunit                                                   | 0.00E+00 |
| 2572233228 | t3m_01585 | ITERM:01638    | electron transfer flavoprotein alpha subunit apoprotein                                        |          |
| 2572233228 | t3m_01585 | Locus_type     | CDS                                                                                            |          |
| 2572233228 | t3m_01585 | Product_name   | electron transfer flavoprotein alpha subunit apoprotein                                        |          |
| 2572233228 | t3m_01585 | Scaffold       | t3m_contig_70_566_len_14045_read_count_1043208.44                                              |          |
| 2572233228 | t3m_01585 | Coordinates    | 10547..11530(+)                                                                                |          |
| 2572233228 | t3m_01585 | DNA_length     | 984bp                                                                                          |          |
| 2572233228 | t3m_01585 | Protein_length | 327aa                                                                                          |          |
| 2572233228 | t3m_01585 | GC             |                                                                                                | 0.71     |
| 2572233229 | t3m_01586 | COG_category   | [C] Energy production and conversion                                                           |          |
| 2572233229 | t3m_01586 | COG0644        | Dehydrogenases (flavoproteins)                                                                 | 4.00E-51 |
| 2572233229 | t3m_01586 | pfam12831      | FAD_oxidored                                                                                   | 9.50E-09 |
| 2572233229 | t3m_01586 | EC:1.5.5.-     | Oxidoreductases. Acting on the CH-NH group of donors. With a quinone or similar compound as ac |          |
| 2572233229 | t3m_01586 | KO:K00313      | electron transfer flavoprotein-quinone oxidoreductase [EC:1.5.5.-]                             | 0.00E+00 |
| 2572233229 | t3m_01586 | Locus_type     | CDS                                                                                            |          |
| 2572233229 | t3m_01586 | Product_name   | Dehydrogenases (flavoproteins)                                                                 |          |
| 2572233229 | t3m_01586 | Scaffold       | t3m_contig_70_566_len_14045_read_count_1043208.44                                              |          |
| 2572233229 | t3m_01586 | Coordinates    | 11594..12895(-)                                                                                |          |
| 2572233229 | t3m_01586 | DNA_length     | 1302bp                                                                                         |          |
| 2572233229 | t3m_01586 | Protein_length | 433aa                                                                                          |          |
| 2572233229 | t3m_01586 | GC             |                                                                                                | 0.68     |
| 2572233230 | t3m_01587 | pfam03703      | bPH_2                                                                                          | 1.40E-16 |
| 2572233230 | t3m_01587 | Locus_type     | CDS                                                                                            |          |
| 2572233230 | t3m_01587 | Product_name   | Bacterial PH domain                                                                            |          |
| 2572233230 | t3m_01587 | Scaffold       | t3m_contig_70_566_len_14045_read_count_1043208.44                                              |          |
| 2572233230 | t3m_01587 | Coordinates    | 12951..13592(-)                                                                                |          |
| 2572233230 | t3m_01587 | DNA_length     | 642bp                                                                                          |          |

|            |           |                |                                                     |          |
|------------|-----------|----------------|-----------------------------------------------------|----------|
| 2572233230 | t3m_01587 | Protein_length | 213aa                                               |          |
| 2572233230 | t3m_01587 | GC             |                                                     | 0.64     |
| 2572233230 | t3m_01587 | Transmembrane  | Yes                                                 |          |
| 2572233231 | t3m_01588 | COG_category   | [J] Translation, ribosomal structure and biogenesis |          |
| 2572233231 | t3m_01588 | COG0361        | Translation initiation factor 1 (IF-1)              | 5.00E-15 |
| 2572233231 | t3m_01588 | pfam01176      | eIF-1a                                              | 8.10E-19 |
| 2572233231 | t3m_01588 | TIGR00523      | eukaryotic/archaeal initiation factor 1A            | 4.00E-31 |
| 2572233231 | t3m_01588 | KO:K03236      | translation initiation factor 1A                    | 2.00E-22 |
| 2572233231 | t3m_01588 | ITERM:01957    | translation initiation factor 1A (aeIF-1A)          |          |
| 2572233231 | t3m_01588 | Locus_type     | CDS                                                 |          |
| 2572233231 | t3m_01588 | Product_name   | translation initiation factor 1A (aeIF-1A)          |          |
| 2572233231 | t3m_01588 | Scaffold       | t3m_contig_70_566_len_14045_read_count_1043208.44   |          |
| 2572233231 | t3m_01588 | Coordinates    | 13722..14042(+)                                     |          |
| 2572233231 | t3m_01588 | DNA_length     | 321bp                                               |          |
| 2572233231 | t3m_01588 | Protein_length | 107aa                                               |          |
| 2572233231 | t3m_01588 | GC             |                                                     | 0.67     |
| 2572233232 | t3m_01589 | Locus_type     | CDS                                                 |          |
| 2572233232 | t3m_01589 | Product_name   | hypothetical protein                                |          |
| 2572233232 | t3m_01589 | Scaffold       | t3m_contig_70_569_len_14038_read_count_992473.45    |          |
| 2572233232 | t3m_01589 | Coordinates    | 152..727(-)                                         |          |
| 2572233232 | t3m_01589 | DNA_length     | 576bp                                               |          |
| 2572233232 | t3m_01589 | Protein_length | 191aa                                               |          |
| 2572233232 | t3m_01589 | GC             |                                                     | 0.71     |
| 2572233233 | t3m_01590 | pfam00041      | fn3                                                 | 1.40E-05 |
| 2572233233 | t3m_01590 | pfam00041      | fn3                                                 | 9.40E-07 |
| 2572233233 | t3m_01590 | pfam00041      | fn3                                                 | 2.00E-05 |
| 2572233233 | t3m_01590 | pfam00041      | fn3                                                 | 2.50E-06 |
| 2572233233 | t3m_01590 | Locus_type     | CDS                                                 |          |
| 2572233233 | t3m_01590 | Product_name   | Fibronectin type III domain                         |          |
| 2572233233 | t3m_01590 | Scaffold       | t3m_contig_70_569_len_14038_read_count_992473.45    |          |
| 2572233233 | t3m_01590 | Coordinates    | 1168..4545(-)                                       |          |

|            |           |                |                                                  |          |
|------------|-----------|----------------|--------------------------------------------------|----------|
| 2572233233 | t3m_01590 | DNA_length     | 3378bp                                           |          |
| 2572233233 | t3m_01590 | Protein_length | 1125aa                                           |          |
| 2572233233 | t3m_01590 | GC             |                                                  | 0.66     |
| 2572233233 | t3m_01590 | Transmembrane  | Yes                                              |          |
| 2572233234 | t3m_01591 | Locus_type     | CDS                                              |          |
| 2572233234 | t3m_01591 | Product_name   | hypothetical protein                             |          |
| 2572233234 | t3m_01591 | Scaffold       | t3m_contig_70_569_len_14038_read_count_992473.45 |          |
| 2572233234 | t3m_01591 | Coordinates    | 4958..5167(-)                                    |          |
| 2572233234 | t3m_01591 | DNA_length     | 210bp                                            |          |
| 2572233234 | t3m_01591 | Protein_length | 69aa                                             |          |
| 2572233234 | t3m_01591 | GC             |                                                  | 0.66     |
| 2572233234 | t3m_01591 | Transmembrane  | Yes                                              |          |
| 2572233235 | t3m_01592 | Locus_type     | CDS                                              |          |
| 2572233235 | t3m_01592 | Product_name   | hypothetical protein                             |          |
| 2572233235 | t3m_01592 | Scaffold       | t3m_contig_70_569_len_14038_read_count_992473.45 |          |
| 2572233235 | t3m_01592 | Coordinates    | 5334..5735(-)                                    |          |
| 2572233235 | t3m_01592 | DNA_length     | 402bp                                            |          |
| 2572233235 | t3m_01592 | Protein_length | 133aa                                            |          |
| 2572233235 | t3m_01592 | GC             |                                                  | 0.73     |
| 2572233236 | t3m_01593 | Locus_type     | CDS                                              |          |
| 2572233236 | t3m_01593 | Product_name   | hypothetical protein                             |          |
| 2572233236 | t3m_01593 | Scaffold       | t3m_contig_70_569_len_14038_read_count_992473.45 |          |
| 2572233236 | t3m_01593 | Coordinates    | 5742..6077(-)                                    |          |
| 2572233236 | t3m_01593 | DNA_length     | 336bp                                            |          |
| 2572233236 | t3m_01593 | Protein_length | 111aa                                            |          |
| 2572233236 | t3m_01593 | GC             |                                                  | 0.79     |
| 2572233237 | t3m_01594 | COG_category   | [S] Function unknown                             |          |
| 2572233237 | t3m_01594 | COG3391        | Uncharacterized conserved protein                | 2.00E-12 |
| 2572233237 | t3m_01594 | TIGR02276      | 40-residue YVTN family beta-propeller repeat     | 8.10E-11 |
| 2572233237 | t3m_01594 | Locus_type     | CDS                                              |          |

|            |           |                |                                                  |          |
|------------|-----------|----------------|--------------------------------------------------|----------|
| 2572233237 | t3m_01594 | Product_name   | 40-residue YVTN family beta-propeller repeat     |          |
| 2572233237 | t3m_01594 | Scaffold       | t3m_contig_70_569_len_14038_read_count_992473.45 |          |
| 2572233237 | t3m_01594 | Coordinates    | 6074..7237(-)                                    |          |
| 2572233237 | t3m_01594 | DNA_length     | 1164bp                                           |          |
| 2572233237 | t3m_01594 | Protein_length | 387aa                                            |          |
| 2572233237 | t3m_01594 | GC             |                                                  | 0.69     |
| 2572233237 | t3m_01594 | Signal_peptide | Yes                                              |          |
| 2572233237 | t3m_01594 | Transmembrane  | Yes                                              |          |
|            |           |                |                                                  |          |
| 2572233238 | t3m_01595 | Locus_type     | CDS                                              |          |
| 2572233238 | t3m_01595 | Product_name   | hypothetical protein                             |          |
| 2572233238 | t3m_01595 | Scaffold       | t3m_contig_70_569_len_14038_read_count_992473.45 |          |
| 2572233238 | t3m_01595 | Coordinates    | 7251..9728(-)                                    |          |
| 2572233238 | t3m_01595 | DNA_length     | 2478bp                                           |          |
| 2572233238 | t3m_01595 | Protein_length | 825aa                                            |          |
| 2572233238 | t3m_01595 | GC             |                                                  | 0.64     |
| 2572233238 | t3m_01595 | Signal_peptide | Yes                                              |          |
| 2572233238 | t3m_01595 | Transmembrane  | Yes                                              |          |
|            |           |                |                                                  |          |
| 2572233239 | t3m_01596 | COG_category   | [S] Function unknown                             |          |
| 2572233239 | t3m_01596 | COG3391        | Uncharacterized conserved protein                | 1.00E-15 |
| 2572233239 | t3m_01596 | pfam00041      | fn3                                              | 2.80E-09 |
| 2572233239 | t3m_01596 | pfam10282      | Lactonase                                        | 2.10E-05 |
| 2572233239 | t3m_01596 | TIGR02276      | 40-residue YVTN family beta-propeller repeat     | 9.30E-11 |
| 2572233239 | t3m_01596 | Locus_type     | CDS                                              |          |
| 2572233239 | t3m_01596 | Product_name   | Uncharacterized conserved protein                |          |
| 2572233239 | t3m_01596 | Scaffold       | t3m_contig_70_569_len_14038_read_count_992473.45 |          |
| 2572233239 | t3m_01596 | Coordinates    | 9764..12394(-)                                   |          |
| 2572233239 | t3m_01596 | DNA_length     | 2631bp                                           |          |
| 2572233239 | t3m_01596 | Protein_length | 876aa                                            |          |
| 2572233239 | t3m_01596 | GC             |                                                  | 0.67     |
| 2572233239 | t3m_01596 | Signal_peptide | Yes                                              |          |
| 2572233239 | t3m_01596 | Transmembrane  | Yes                                              |          |

|            |           |                |                                                   |          |
|------------|-----------|----------------|---------------------------------------------------|----------|
| 2572233240 | t3m_01597 | Locus_type     | CDS                                               |          |
| 2572233240 | t3m_01597 | Product_name   | hypothetical protein                              |          |
| 2572233240 | t3m_01597 | Scaffold       | t3m_contig_70_569_len_14038_read_count_992473.45  |          |
| 2572233240 | t3m_01597 | Coordinates    | 12555..13100(+)                                   |          |
| 2572233240 | t3m_01597 | DNA_length     | 546bp                                             |          |
| 2572233240 | t3m_01597 | Protein_length | 181aa                                             |          |
| 2572233240 | t3m_01597 | GC             |                                                   | 0.67     |
|            |           |                |                                                   |          |
| 2572233241 | t3m_01598 | Locus_type     | CDS                                               |          |
| 2572233241 | t3m_01598 | Product_name   | hypothetical protein                              |          |
| 2572233241 | t3m_01598 | Scaffold       | t3m_contig_70_569_len_14038_read_count_992473.45  |          |
| 2572233241 | t3m_01598 | Coordinates    | 13456..13770(+)                                   |          |
| 2572233241 | t3m_01598 | DNA_length     | 315bp                                             |          |
| 2572233241 | t3m_01598 | Protein_length | 104aa                                             |          |
| 2572233241 | t3m_01598 | GC             |                                                   | 0.77     |
|            |           |                |                                                   |          |
| 2572233242 | t3m_01599 | pfam03590      | AsnA                                              | 5.80E-54 |
| 2572233242 | t3m_01599 | Locus_type     | CDS                                               |          |
| 2572233242 | t3m_01599 | Product_name   | Aspartate-ammonia ligase                          |          |
| 2572233242 | t3m_01599 | Scaffold       | t3m_contig_70_592_len_13739_read_count_1164878.46 |          |
| 2572233242 | t3m_01599 | Coordinates    | 2..730(-)                                         |          |
| 2572233242 | t3m_01599 | DNA_length     | 729bp                                             |          |
| 2572233242 | t3m_01599 | Protein_length | 243aa                                             |          |
| 2572233242 | t3m_01599 | GC             |                                                   | 0.65     |
|            |           |                |                                                   |          |
| 2572233243 | t3m_01600 | Locus_type     | CDS                                               |          |
| 2572233243 | t3m_01600 | Product_name   | hypothetical protein                              |          |
| 2572233243 | t3m_01600 | Scaffold       | t3m_contig_70_592_len_13739_read_count_1164878.46 |          |
| 2572233243 | t3m_01600 | Coordinates    | 952..1656(+)                                      |          |
| 2572233243 | t3m_01600 | DNA_length     | 705bp                                             |          |
| 2572233243 | t3m_01600 | Protein_length | 234aa                                             |          |
| 2572233243 | t3m_01600 | GC             |                                                   | 0.64     |
|            |           |                |                                                   |          |
| 2572233244 | t3m_01601 | Locus_type     | CDS                                               |          |

|            |           |                |                                                                |          |
|------------|-----------|----------------|----------------------------------------------------------------|----------|
| 2572233244 | t3m_01601 | Product_name   | hypothetical protein                                           |          |
| 2572233244 | t3m_01601 | Scaffold       | t3m_contig_70_592_len_13739_read_count_1164878.46              |          |
| 2572233244 | t3m_01601 | Coordinates    | 1865..2485(+)                                                  |          |
| 2572233244 | t3m_01601 | DNA_length     | 621bp                                                          |          |
| 2572233244 | t3m_01601 | Protein_length | 206aa                                                          |          |
| 2572233244 | t3m_01601 | GC             |                                                                | 0.67     |
| 2572233245 | t3m_01602 | pfam00583      | Acetyltransf_1                                                 | 2.00E-07 |
| 2572233245 | t3m_01602 | Locus_type     | CDS                                                            |          |
| 2572233245 | t3m_01602 | Product_name   | Acetyltransferase (GNAT) family                                |          |
| 2572233245 | t3m_01602 | Scaffold       | t3m_contig_70_592_len_13739_read_count_1164878.46              |          |
| 2572233245 | t3m_01602 | Coordinates    | 2554..3117(-)                                                  |          |
| 2572233245 | t3m_01602 | DNA_length     | 564bp                                                          |          |
| 2572233245 | t3m_01602 | Protein_length | 187aa                                                          |          |
| 2572233245 | t3m_01602 | GC             |                                                                | 0.68     |
| 2572233246 | t3m_01603 | COG_category   | [E] Amino acid transport and metabolism                        |          |
| 2572233246 | t3m_01603 | COG_category   | [G] Carbohydrate transport and metabolism                      |          |
| 2572233246 | t3m_01603 | COG_category   | [R] General function prediction only                           |          |
| 2572233246 | t3m_01603 | COG0697        | Permeases of the drug/metabolite transporter (DMT) superfamily | 1.00E-07 |
| 2572233246 | t3m_01603 | pfam00892      | EamA                                                           | 4.60E-12 |
| 2572233246 | t3m_01603 | pfam00892      | EamA                                                           | 4.00E-13 |
| 2572233246 | t3m_01603 | Locus_type     | CDS                                                            |          |
| 2572233246 | t3m_01603 | Product_name   | Permeases of the drug/metabolite transporter (DMT) superfamily |          |
| 2572233246 | t3m_01603 | Scaffold       | t3m_contig_70_592_len_13739_read_count_1164878.46              |          |
| 2572233246 | t3m_01603 | Coordinates    | 3279..4226(+)                                                  |          |
| 2572233246 | t3m_01603 | DNA_length     | 948bp                                                          |          |
| 2572233246 | t3m_01603 | Protein_length | 315aa                                                          |          |
| 2572233246 | t3m_01603 | GC             |                                                                | 0.67     |
| 2572233246 | t3m_01603 | Transmembrane  | Yes                                                            |          |
| 2572233247 | t3m_01604 | COG_category   | [S] Function unknown                                           |          |
| 2572233247 | t3m_01604 | COG3832        | Uncharacterized conserved protein                              | 4.00E-11 |
| 2572233247 | t3m_01604 | pfam08327      | AHSA1                                                          | 1.90E-18 |

|            |           |                |                                                   |      |
|------------|-----------|----------------|---------------------------------------------------|------|
| 2572233247 | t3m_01604 | Locus_type     | CDS                                               |      |
| 2572233247 | t3m_01604 | Product_name   | Uncharacterized conserved protein                 |      |
| 2572233247 | t3m_01604 | Scaffold       | t3m_contig_70_592_len_13739_read_count_1164878.46 |      |
| 2572233247 | t3m_01604 | Coordinates    | 4380..4826(+)                                     |      |
| 2572233247 | t3m_01604 | DNA_length     | 447bp                                             |      |
| 2572233247 | t3m_01604 | Protein_length | 148aa                                             |      |
| 2572233247 | t3m_01604 | GC             |                                                   | 0.66 |
|            |           |                |                                                   |      |
| 2572233248 | t3m_01605 | Locus_type     | CDS                                               |      |
| 2572233248 | t3m_01605 | Product_name   | hypothetical protein                              |      |
| 2572233248 | t3m_01605 | Scaffold       | t3m_contig_70_592_len_13739_read_count_1164878.46 |      |
| 2572233248 | t3m_01605 | Coordinates    | 4863..5324(+)                                     |      |
| 2572233248 | t3m_01605 | DNA_length     | 462bp                                             |      |
| 2572233248 | t3m_01605 | Protein_length | 153aa                                             |      |
| 2572233248 | t3m_01605 | GC             |                                                   | 0.65 |
|            |           |                |                                                   |      |
| 2572233249 | t3m_01606 | Locus_type     | CDS                                               |      |
| 2572233249 | t3m_01606 | Product_name   | hypothetical protein                              |      |
| 2572233249 | t3m_01606 | Scaffold       | t3m_contig_70_592_len_13739_read_count_1164878.46 |      |
| 2572233249 | t3m_01606 | Coordinates    | 5365..6669(-)                                     |      |
| 2572233249 | t3m_01606 | DNA_length     | 1305bp                                            |      |
| 2572233249 | t3m_01606 | Protein_length | 434aa                                             |      |
| 2572233249 | t3m_01606 | GC             |                                                   | 0.68 |
| 2572233249 | t3m_01606 | Transmembrane  | Yes                                               |      |
|            |           |                |                                                   |      |
| 2572233250 | t3m_01607 | Locus_type     | CDS                                               |      |
| 2572233250 | t3m_01607 | Product_name   | hypothetical protein                              |      |
| 2572233250 | t3m_01607 | Scaffold       | t3m_contig_70_592_len_13739_read_count_1164878.46 |      |
| 2572233250 | t3m_01607 | Coordinates    | 7139..8005(-)                                     |      |
| 2572233250 | t3m_01607 | DNA_length     | 867bp                                             |      |
| 2572233250 | t3m_01607 | Protein_length | 288aa                                             |      |
| 2572233250 | t3m_01607 | GC             |                                                   | 0.65 |
|            |           |                |                                                   |      |
| 2572233251 | t3m_01608 | COG_category   | [R] General function prediction only              |      |



|            |           |                |                                                   |          |
|------------|-----------|----------------|---------------------------------------------------|----------|
| 2572233251 | t3m_01608 | COG3413        | Predicted DNA binding protein                     | 2.00E-12 |
| 2572233251 | t3m_01608 | pfam04967      | HTH_10                                            | 5.30E-13 |
| 2572233251 | t3m_01608 | Locus_type     | CDS                                               |          |
| 2572233251 | t3m_01608 | Product_name   | Predicted DNA binding protein                     |          |
| 2572233251 | t3m_01608 | Scaffold       | t3m_contig_70_592_len_13739_read_count_1164878.46 |          |
| 2572233251 | t3m_01608 | Coordinates    | 8366..9061(+)                                     |          |
| 2572233251 | t3m_01608 | DNA_length     | 696bp                                             |          |
| 2572233251 | t3m_01608 | Protein_length | 231aa                                             |          |
| 2572233251 | t3m_01608 | GC             |                                                   | 0.65     |
| 2572233252 | t3m_01609 | COG_category   | [S] Function unknown                              |          |
| 2572233252 | t3m_01609 | COG2350        | Uncharacterized protein conserved in bacteria     | 4.00E-06 |
| 2572233252 | t3m_01609 | pfam03795      | YCII                                              | 2.20E-10 |
| 2572233252 | t3m_01609 | Locus_type     | CDS                                               |          |
| 2572233252 | t3m_01609 | Product_name   | Uncharacterized protein conserved in bacteria     |          |
| 2572233252 | t3m_01609 | Scaffold       | t3m_contig_70_592_len_13739_read_count_1164878.46 |          |
| 2572233252 | t3m_01609 | Coordinates    | 9093..9449(-)                                     |          |
| 2572233252 | t3m_01609 | DNA_length     | 357bp                                             |          |
| 2572233252 | t3m_01609 | Protein_length | 118aa                                             |          |
| 2572233252 | t3m_01609 | GC             |                                                   | 0.68     |
| 2572233253 | t3m_01610 | COG_category   | [S] Function unknown                              |          |
| 2572233253 | t3m_01610 | COG4805        | Uncharacterized protein conserved in bacteria     | 0.00E+00 |
| 2572233253 | t3m_01610 | pfam05960      | DUF885                                            | 0.00E+00 |
| 2572233253 | t3m_01610 | Locus_type     | CDS                                               |          |
| 2572233253 | t3m_01610 | Product_name   | Uncharacterized protein conserved in bacteria     |          |
| 2572233253 | t3m_01610 | Scaffold       | t3m_contig_70_592_len_13739_read_count_1164878.46 |          |
| 2572233253 | t3m_01610 | Coordinates    | 9459..11288(-)                                    |          |
| 2572233253 | t3m_01610 | DNA_length     | 1830bp                                            |          |
| 2572233253 | t3m_01610 | Protein_length | 609aa                                             |          |
| 2572233253 | t3m_01610 | GC             |                                                   | 0.68     |
| 2572233254 | t3m_01611 | COG_category   | [E] Amino acid transport and metabolism           |          |
| 2572233254 | t3m_01611 | COG0346        | Lactoylglutathione lyase and related lyases       | 5.00E-04 |

|            |           |                |                                               |                                                   |          |
|------------|-----------|----------------|-----------------------------------------------|---------------------------------------------------|----------|
| 2572233254 | t3m_01611 | pfam12681      | Glyoxalase_2                                  |                                                   | 1.30E-14 |
| 2572233254 | t3m_01611 | Locus_type     |                                               | CDS                                               |          |
| 2572233254 | t3m_01611 | Product_name   |                                               | Lactoylglutathione lyase and related lyases       |          |
| 2572233254 | t3m_01611 | Scaffold       |                                               | t3m_contig_70_592_len_13739_read_count_1164878.46 |          |
| 2572233254 | t3m_01611 | Coordinates    |                                               | 11397..11822(+)                                   |          |
| 2572233254 | t3m_01611 | DNA_length     |                                               | 426bp                                             |          |
| 2572233254 | t3m_01611 | Protein_length |                                               | 141aa                                             |          |
| 2572233254 | t3m_01611 | GC             |                                               |                                                   | 0.65     |
| 2572233255 | t3m_01612 | Locus_type     |                                               | CDS                                               |          |
| 2572233255 | t3m_01612 | Product_name   |                                               | hypothetical protein                              |          |
| 2572233255 | t3m_01612 | Scaffold       |                                               | t3m_contig_70_592_len_13739_read_count_1164878.46 |          |
| 2572233255 | t3m_01612 | Coordinates    |                                               | 11819..12397(-)                                   |          |
| 2572233255 | t3m_01612 | DNA_length     |                                               | 579bp                                             |          |
| 2572233255 | t3m_01612 | Protein_length |                                               | 192aa                                             |          |
| 2572233255 | t3m_01612 | GC             |                                               |                                                   | 0.71     |
| 2572233255 | t3m_01612 | Transmembrane  |                                               | Yes                                               |          |
| 2572233256 | t3m_01613 | pfam13912      | zf-C2H2_6                                     |                                                   | 5.50E-04 |
| 2572233256 | t3m_01613 | pfam00096      | zf-C2H2                                       |                                                   | 2.70E-03 |
| 2572233256 | t3m_01613 | Locus_type     |                                               | CDS                                               |          |
| 2572233256 | t3m_01613 | Product_name   |                                               | C2H2-type zinc finger/Zinc finger, C2H2 type      |          |
| 2572233256 | t3m_01613 | Scaffold       |                                               | t3m_contig_70_592_len_13739_read_count_1164878.46 |          |
| 2572233256 | t3m_01613 | Coordinates    |                                               | 12674..12901(+)                                   |          |
| 2572233256 | t3m_01613 | DNA_length     |                                               | 228bp                                             |          |
| 2572233256 | t3m_01613 | Protein_length |                                               | 75aa                                              |          |
| 2572233256 | t3m_01613 | GC             |                                               |                                                   | 0.67     |
| 2572233257 | t3m_01614 | COG_category   | [S] Function unknown                          |                                                   |          |
| 2572233257 | t3m_01614 | COG2764        | Uncharacterized protein conserved in bacteria |                                                   | 4.00E-31 |
| 2572233257 | t3m_01614 | pfam12681      | Glyoxalase_2                                  |                                                   | 7.90E-14 |
| 2572233257 | t3m_01614 | Locus_type     |                                               | CDS                                               |          |
| 2572233257 | t3m_01614 | Product_name   |                                               | Uncharacterized protein conserved in bacteria     |          |
| 2572233257 | t3m_01614 | Scaffold       |                                               | t3m_contig_70_592_len_13739_read_count_1164878.46 |          |

|            |           |                |       |                                                   |          |
|------------|-----------|----------------|-------|---------------------------------------------------|----------|
| 2572233257 | t3m_01614 | Coordinates    |       | 13008..13559(+)                                   |          |
| 2572233257 | t3m_01614 | DNA_length     |       | 552bp                                             |          |
| 2572233257 | t3m_01614 | Protein_length |       | 183aa                                             |          |
| 2572233257 | t3m_01614 | GC             |       |                                                   | 0.66     |
| 2572233258 | t3m_01615 | Locus_type     |       | CDS                                               |          |
| 2572233258 | t3m_01615 | Product_name   |       | hypothetical protein                              |          |
| 2572233258 | t3m_01615 | Scaffold       |       | t3m_contig_70_638_len_13083_read_count_1168974.47 |          |
| 2572233258 | t3m_01615 | Coordinates    |       | 167..649(-)                                       |          |
| 2572233258 | t3m_01615 | DNA_length     |       | 483bp                                             |          |
| 2572233258 | t3m_01615 | Protein_length |       | 160aa                                             |          |
| 2572233258 | t3m_01615 | GC             |       |                                                   | 0.66     |
| 2572233258 | t3m_01615 | Transmembrane  |       | Yes                                               |          |
| 2572233259 | t3m_01616 | Locus_type     |       | CDS                                               |          |
| 2572233259 | t3m_01616 | Product_name   |       | hypothetical protein                              |          |
| 2572233259 | t3m_01616 | Scaffold       |       | t3m_contig_70_638_len_13083_read_count_1168974.47 |          |
| 2572233259 | t3m_01616 | Coordinates    |       | 646..1089(-)                                      |          |
| 2572233259 | t3m_01616 | DNA_length     |       | 444bp                                             |          |
| 2572233259 | t3m_01616 | Protein_length |       | 147aa                                             |          |
| 2572233259 | t3m_01616 | GC             |       |                                                   | 0.63     |
| 2572233259 | t3m_01616 | Transmembrane  |       | Yes                                               |          |
| 2572233260 | t3m_01617 | Locus_type     |       | CDS                                               |          |
| 2572233260 | t3m_01617 | Product_name   |       | hypothetical protein                              |          |
| 2572233260 | t3m_01617 | Scaffold       |       | t3m_contig_70_638_len_13083_read_count_1168974.47 |          |
| 2572233260 | t3m_01617 | Coordinates    |       | 1100..1390(-)                                     |          |
| 2572233260 | t3m_01617 | DNA_length     |       | 291bp                                             |          |
| 2572233260 | t3m_01617 | Protein_length |       | 96aa                                              |          |
| 2572233260 | t3m_01617 | GC             |       |                                                   | 0.62     |
| 2572233261 | t3m_01618 | pfam08448      | PAS_4 |                                                   | 3.50E-07 |
| 2572233261 | t3m_01618 | Locus_type     |       | CDS                                               |          |
| 2572233261 | t3m_01618 | Product_name   |       | PAS fold                                          |          |

|            |           |                |                                                                    |           |
|------------|-----------|----------------|--------------------------------------------------------------------|-----------|
| 2572233261 | t3m_01618 | Scaffold       | t3m_contig_70_638_len_13083_read_count_1168974.47                  |           |
| 2572233261 | t3m_01618 | Coordinates    | 1485..1835(-)                                                      |           |
| 2572233261 | t3m_01618 | DNA_length     | 351bp                                                              |           |
| 2572233261 | t3m_01618 | Protein_length | 116aa                                                              |           |
| 2572233261 | t3m_01618 | GC             |                                                                    | 0.58      |
| 2572233262 | t3m_01619 | KEGG_module    | M00121: Heme biosynthesis, glutamate => protoheme/siroheme         |           |
| 2572233262 | t3m_01619 | Metacyc        | PWY-5188: tetrapyrrole biosynthesis I (from glutamate)             |           |
| 2572233262 | t3m_01619 | COG_category   | [H] Coenzyme transport and metabolism                              |           |
| 2572233262 | t3m_01619 | COG0001        | Glutamate-1-semialdehyde aminotransferase                          | 1.00E-102 |
| 2572233262 | t3m_01619 | pfam00202      | Aminotran_3                                                        | 6.70E-56  |
| 2572233262 | t3m_01619 | EC:5.4.3.8     | Glutamate-1-semialdehyde 2,1-aminomutase.                          |           |
| 2572233262 | t3m_01619 | TIGR00713      | glutamate-1-semialdehyde-2,1-aminomutase                           | 3.90E-97  |
| 2572233262 | t3m_01619 | KO:K01845      | glutamate-1-semialdehyde 2,1-aminomutase [EC:5.4.3.8]              | 0.00E+00  |
| 2572233262 | t3m_01619 | Locus_type     | CDS                                                                |           |
| 2572233262 | t3m_01619 | Product_name   | Glutamate-1-semialdehyde aminotransferase                          |           |
| 2572233262 | t3m_01619 | Scaffold       | t3m_contig_70_638_len_13083_read_count_1168974.47                  |           |
| 2572233262 | t3m_01619 | Coordinates    | 2011..3381(-)                                                      |           |
| 2572233262 | t3m_01619 | DNA_length     | 1371bp                                                             |           |
| 2572233262 | t3m_01619 | Protein_length | 456aa                                                              |           |
| 2572233262 | t3m_01619 | GC             |                                                                    | 0.65      |
| 2572233263 | t3m_01620 | KEGG_module    | M00013: Malonate semialdehyde pathway, propanoyl-CoA => Acetyl-CoA |           |
| 2572233263 | t3m_01620 | Metacyc        | PWY-6373: acrylate degradation                                     |           |
| 2572233263 | t3m_01620 | Metacyc        | VALDEG-PWY: valine degradation I                                   |           |
| 2572233263 | t3m_01620 | Metacyc        | PWY-5642: 2,4-dinitrotoluene degradation                           |           |
| 2572233263 | t3m_01620 | COG_category   | [C] Energy production and conversion                               |           |
| 2572233263 | t3m_01620 | COG1012        | NAD-dependent aldehyde dehydrogenases                              | 1.00E-118 |
| 2572233263 | t3m_01620 | pfam00171      | Aldedh                                                             | 0.00E+00  |
| 2572233263 | t3m_01620 | EC:1.2.1.27    | Methylmalonate-semialdehyde dehydrogenase (acylating).             |           |
| 2572233263 | t3m_01620 | EC:1.2.1.18    | Malonate-semialdehyde dehydrogenase (acetylating).                 |           |
| 2572233263 | t3m_01620 | TIGR01722      | methylmalonic acid semialdehyde dehydrogenase                      | 0.00E+00  |
| 2572233263 | t3m_01620 | KO:K00140      | malonate-semialdehyde dehydrogenase (acetylating) / methylmalonate | 0.00E+00  |
| 2572233263 | t3m_01620 | Locus_type     | CDS                                                                |           |

|            |           |                |                                                                |           |
|------------|-----------|----------------|----------------------------------------------------------------|-----------|
| 2572233263 | t3m_01620 | Product_name   | methyalmalonic acid semialdehyde dehydrogenase                 |           |
| 2572233263 | t3m_01620 | Scaffold       | t3m_contig_70_638_len_13083_read_count_1168974.47              |           |
| 2572233263 | t3m_01620 | Coordinates    | 3538..4986(+)                                                  |           |
| 2572233263 | t3m_01620 | DNA_length     | 1449bp                                                         |           |
| 2572233263 | t3m_01620 | Protein_length | 482aa                                                          |           |
| 2572233263 | t3m_01620 | GC             |                                                                | 0.67      |
|            |           |                |                                                                |           |
| 2572233264 | t3m_01621 | Metacyc        | TAURINEDEG-PWY: taurine degradation III                        |           |
| 2572233264 | t3m_01621 | COG_category   | [E] Amino acid transport and metabolism                        |           |
| 2572233264 | t3m_01621 | COG0160        | 4-aminobutyrate aminotransferase and related aminotransferases | 2.00E-109 |
| 2572233264 | t3m_01621 | pfam00202      | Aminotran_3                                                    | 5.30E-88  |
| 2572233264 | t3m_01621 | EC:2.6.1.55    | Taurine--2-oxoglutarate transaminase.                          |           |
| 2572233264 | t3m_01621 | KO:K15372      | taurine---2-oxoglutarate transaminase [EC:2.6.1.55]            | 0.00E+00  |
| 2572233264 | t3m_01621 | Locus_type     | CDS                                                            |           |
| 2572233264 | t3m_01621 | Product_name   | 4-aminobutyrate aminotransferase and related aminotransferases |           |
| 2572233264 | t3m_01621 | Scaffold       | t3m_contig_70_638_len_13083_read_count_1168974.47              |           |
| 2572233264 | t3m_01621 | Coordinates    | 5005..6351(-)                                                  |           |
| 2572233264 | t3m_01621 | DNA_length     | 1347bp                                                         |           |
| 2572233264 | t3m_01621 | Protein_length | 448aa                                                          |           |
| 2572233264 | t3m_01621 | GC             |                                                                | 0.67      |
|            |           |                |                                                                |           |
| 2572233265 | t3m_01622 | pfam04909      | Amidohydro_2                                                   | 7.80E-41  |
| 2572233265 | t3m_01622 | Locus_type     | CDS                                                            |           |
| 2572233265 | t3m_01622 | Product_name   | Amidohydrolase                                                 |           |
| 2572233265 | t3m_01622 | Scaffold       | t3m_contig_70_638_len_13083_read_count_1168974.47              |           |
| 2572233265 | t3m_01622 | Coordinates    | 6413..7282(-)                                                  |           |
| 2572233265 | t3m_01622 | DNA_length     | 870bp                                                          |           |
| 2572233265 | t3m_01622 | Protein_length | 289aa                                                          |           |
| 2572233265 | t3m_01622 | GC             |                                                                | 0.65      |
|            |           |                |                                                                |           |
| 2572233266 | t3m_01623 | KEGG_module    | M00033: Ectoine biosynthesis, aspartate => ectoine             |           |
| 2572233266 | t3m_01623 | Metacyc        | P101-PWY: ectoine biosynthesis                                 |           |
| 2572233266 | t3m_01623 | Metacyc        | PWY-6409: pyoverdine I biosynthesis                            |           |
| 2572233266 | t3m_01623 | Metacyc        | PWY-6562: norspermidine biosynthesis                           |           |

|            |           |                |                                                                |           |
|------------|-----------|----------------|----------------------------------------------------------------|-----------|
| 2572233266 | t3m_01623 | Metacyc        | PWY-761: rhizobactin 1021 biosynthesis                         |           |
| 2572233266 | t3m_01623 | COG_category   | [E] Amino acid transport and metabolism                        |           |
| 2572233266 | t3m_01623 | COG0160        | 4-aminobutyrate aminotransferase and related aminotransferases | 4.00E-120 |
| 2572233266 | t3m_01623 | pfam00202      | Aminotran_3                                                    | 5.60E-90  |
| 2572233266 | t3m_01623 | EC:2.6.1.76    | Diaminobutyrate--2-oxoglutarate transaminase.                  |           |
| 2572233266 | t3m_01623 | KO:K00836      | diaminobutyrate-2-oxoglutarate transaminase [EC:2.6.1.76]      | 0.00E+00  |
| 2572233266 | t3m_01623 | Locus_type     | CDS                                                            |           |
| 2572233266 | t3m_01623 | Product_name   | 4-aminobutyrate aminotransferase and related aminotransferases |           |
| 2572233266 | t3m_01623 | Scaffold       | t3m_contig_70_638_len_13083_read_count_1168974.47              |           |
| 2572233266 | t3m_01623 | Coordinates    | 7841..9352(+)                                                  |           |
| 2572233266 | t3m_01623 | DNA_length     | 1512bp                                                         |           |
| 2572233266 | t3m_01623 | Protein_length | 503aa                                                          |           |
| 2572233266 | t3m_01623 | GC             |                                                                | 0.7       |
| 2572233267 | t3m_01624 | KEGG_module    | M00375: Hydroxypropionate-hydroxybutylate cycle                |           |
| 2572233267 | t3m_01624 | KEGG_module    | M00374: Dicarboxylate-hydroxybutyrate cycle                    |           |
| 2572233267 | t3m_01624 | Metacyc        | PWY-5789: 3-hydroxypropionate/4-hydroxybutyrate cycle          |           |
| 2572233267 | t3m_01624 | Metacyc        | PWY-5677: succinate fermentation to butyrate                   |           |
| 2572233267 | t3m_01624 | COG_category   | [C] Energy production and conversion                           |           |
| 2572233267 | t3m_01624 | COG1012        | NAD-dependent aldehyde dehydrogenases                          | 3.00E-130 |
| 2572233267 | t3m_01624 | pfam00171      | Aldedh                                                         | 0.00E+00  |
| 2572233267 | t3m_01624 | EC:1.2.1.76    | Succinate-semialdehyde dehydrogenase (acetylating).            |           |
| 2572233267 | t3m_01624 | KO:K15038      | succinyl-coA reductase [EC:1.2.1.76]                           | 0.00E+00  |
| 2572233267 | t3m_01624 | Locus_type     | CDS                                                            |           |
| 2572233267 | t3m_01624 | Product_name   | NAD-dependent aldehyde dehydrogenases                          |           |
| 2572233267 | t3m_01624 | Scaffold       | t3m_contig_70_638_len_13083_read_count_1168974.47              |           |
| 2572233267 | t3m_01624 | Coordinates    | 9368..10852(-)                                                 |           |
| 2572233267 | t3m_01624 | DNA_length     | 1485bp                                                         |           |
| 2572233267 | t3m_01624 | Protein_length | 494aa                                                          |           |
| 2572233267 | t3m_01624 | GC             |                                                                | 0.71      |
| 2572233268 | t3m_01625 | KEGG_module    | M00555: Betaine biosynthesis, choline => betaine               |           |
| 2572233268 | t3m_01625 | Metacyc        | PWY1F-353: glycine betaine biosynthesis III (plants)           |           |
| 2572233268 | t3m_01625 | Metacyc        | CHOLINE-BETAINE-ANA-PWY: choline degradation I                 |           |

|            |           |                |                                                                     |          |
|------------|-----------|----------------|---------------------------------------------------------------------|----------|
| 2572233268 | t3m_01625 | Metacyc        | PWY-3722: glycine betaine biosynthesis II (Gram-positive bacteria)  |          |
| 2572233268 | t3m_01625 | Metacyc        | BETSYN-PWY: glycine betaine biosynthesis I (Gram-negative bacteria) |          |
| 2572233268 | t3m_01625 | COG_category   | [C] Energy production and conversion                                |          |
| 2572233268 | t3m_01625 | COG1012        | NAD-dependent aldehyde dehydrogenases                               | 0.00E+00 |
| 2572233268 | t3m_01625 | pfam00171      | Aldedh                                                              | 0.00E+00 |
| 2572233268 | t3m_01625 | EC:1.2.1.8     | Betaine-aldehyde dehydrogenase.                                     |          |
| 2572233268 | t3m_01625 | KO:K00130      | betaine-aldehyde dehydrogenase [EC:1.2.1.8]                         | 0.00E+00 |
| 2572233268 | t3m_01625 | Locus_type     | CDS                                                                 |          |
| 2572233268 | t3m_01625 | Product_name   | NAD-dependent aldehyde dehydrogenases                               |          |
| 2572233268 | t3m_01625 | Scaffold       | t3m_contig_70_638_len_13083_read_count_1168974.47                   |          |
| 2572233268 | t3m_01625 | Coordinates    | 10861..12354(-)                                                     |          |
| 2572233268 | t3m_01625 | DNA_length     | 1494bp                                                              |          |
| 2572233268 | t3m_01625 | Protein_length | 497aa                                                               |          |
| 2572233268 | t3m_01625 | GC             |                                                                     | 0.68     |
| 2572233269 | t3m_01626 | Locus_type     | CDS                                                                 |          |
| 2572233269 | t3m_01626 | Product_name   | hypothetical protein                                                |          |
| 2572233269 | t3m_01626 | Scaffold       | t3m_contig_70_638_len_13083_read_count_1168974.47                   |          |
| 2572233269 | t3m_01626 | Coordinates    | 12492..13082(+)                                                     |          |
| 2572233269 | t3m_01626 | DNA_length     | 591bp                                                               |          |
| 2572233269 | t3m_01626 | Protein_length | 197aa                                                               |          |
| 2572233269 | t3m_01626 | GC             |                                                                     | 0.64     |
| 2572233269 | t3m_01626 | Transmembrane  | Yes                                                                 |          |
| 2572233270 | t3m_01627 | Locus_type     | tRNA                                                                |          |
| 2572233270 | t3m_01627 | Product_name   | tRNA_Ala_CGC                                                        |          |
| 2572233270 | t3m_01627 | Scaffold       | t3m_contig_70_652_len_12777_read_count_1101433.48                   |          |
| 2572233270 | t3m_01627 | Coordinates    | 2..73(-)                                                            |          |
| 2572233270 | t3m_01627 | DNA_length     | 72bp                                                                |          |
| 2572233270 | t3m_01627 | GC             |                                                                     | 0.6      |
| 2572233271 | t3m_01628 | COG_category   | [S] Function unknown                                                |          |
| 2572233271 | t3m_01628 | COG4754        | Uncharacterized conserved protein                                   | 8.00E-19 |
| 2572233271 | t3m_01628 | pfam09821      | AAA_assoc_C                                                         | 1.50E-25 |

|            |           |                |                                                                      |          |
|------------|-----------|----------------|----------------------------------------------------------------------|----------|
| 2572233271 | t3m_01628 | Locus_type     | CDS                                                                  |          |
| 2572233271 | t3m_01628 | Product_name   | Uncharacterized conserved protein                                    |          |
| 2572233271 | t3m_01628 | Scaffold       | t3m_contig_70_652_len_12777_read_count_1101433.48                    |          |
| 2572233271 | t3m_01628 | Coordinates    | 193..813(-)                                                          |          |
| 2572233271 | t3m_01628 | DNA_length     | 621bp                                                                |          |
| 2572233271 | t3m_01628 | Protein_length | 206aa                                                                |          |
| 2572233271 | t3m_01628 | GC             |                                                                      | 0.67     |
|            |           |                |                                                                      |          |
| 2572233272 | t3m_01629 | KEGG_module    | M00188: NitT/TauT family transport system                            |          |
| 2572233272 | t3m_01629 | COG_category   | [P] Inorganic ion transport and metabolism                           |          |
| 2572233272 | t3m_01629 | COG1116        | ABC-type nitrate/sulfonate/bicarbonate transport system, ATPase comp | 3.00E-80 |
| 2572233272 | t3m_01629 | pfam00005      | ABC_tran                                                             | 1.10E-29 |
| 2572233272 | t3m_01629 | KO:K02049      | NitT/TauT family transport system ATP-binding protein                | 0.00E+00 |
| 2572233272 | t3m_01629 | Locus_type     | CDS                                                                  |          |
| 2572233272 | t3m_01629 | Product_name   | ABC-type nitrate/sulfonate/bicarbonate transport system, ATPase comp |          |
| 2572233272 | t3m_01629 | Scaffold       | t3m_contig_70_652_len_12777_read_count_1101433.48                    |          |
| 2572233272 | t3m_01629 | Coordinates    | 858..1691(-)                                                         |          |
| 2572233272 | t3m_01629 | DNA_length     | 834bp                                                                |          |
| 2572233272 | t3m_01629 | Protein_length | 277aa                                                                |          |
| 2572233272 | t3m_01629 | GC             |                                                                      | 0.66     |
|            |           |                |                                                                      |          |
| 2572233273 | t3m_01630 | KEGG_module    | M00188: NitT/TauT family transport system                            |          |
| 2572233273 | t3m_01630 | COG_category   | [P] Inorganic ion transport and metabolism                           |          |
| 2572233273 | t3m_01630 | COG4986        | ABC-type anion transport system, duplicated permease component       | 2.00E-76 |
| 2572233273 | t3m_01630 | pfam00528      | BPD_transp_1                                                         | 8.30E-19 |
| 2572233273 | t3m_01630 | pfam00528      | BPD_transp_1                                                         | 2.70E-18 |
| 2572233273 | t3m_01630 | KO:K02050      | NitT/TauT family transport system permease protein                   | 0.00E+00 |
| 2572233273 | t3m_01630 | Locus_type     | CDS                                                                  |          |
| 2572233273 | t3m_01630 | Product_name   | ABC-type anion transport system, duplicated permease component       |          |
| 2572233273 | t3m_01630 | Scaffold       | t3m_contig_70_652_len_12777_read_count_1101433.48                    |          |
| 2572233273 | t3m_01630 | Coordinates    | 1704..3437(-)                                                        |          |
| 2572233273 | t3m_01630 | DNA_length     | 1734bp                                                               |          |
| 2572233273 | t3m_01630 | Protein_length | 577aa                                                                |          |
| 2572233273 | t3m_01630 | GC             |                                                                      | 0.65     |



|            |           |                |                                              |                                                   |          |
|------------|-----------|----------------|----------------------------------------------|---------------------------------------------------|----------|
| 2572233273 | t3m_01630 | Transmembrane  |                                              | Yes                                               |          |
| 2572233274 | t3m_01631 | Locus_type     |                                              | tRNA                                              |          |
| 2572233274 | t3m_01631 | Product_name   |                                              | tRNA_Gln_CTG                                      |          |
| 2572233274 | t3m_01631 | Scaffold       |                                              | t3m_contig_70_652_len_12777_read_count_1101433.48 |          |
| 2572233274 | t3m_01631 | Coordinates    |                                              | 3656..3728(+)                                     |          |
| 2572233274 | t3m_01631 | DNA_length     |                                              | 73bp                                              |          |
| 2572233274 | t3m_01631 | GC             |                                              |                                                   | 0.63     |
| 2572233275 | t3m_01632 | pfam00149      | Metallophos                                  |                                                   | 4.30E-08 |
| 2572233275 | t3m_01632 | Locus_type     |                                              | CDS                                               |          |
| 2572233275 | t3m_01632 | Product_name   |                                              | Calcineurin-like phosphoesterase                  |          |
| 2572233275 | t3m_01632 | Scaffold       |                                              | t3m_contig_70_652_len_12777_read_count_1101433.48 |          |
| 2572233275 | t3m_01632 | Coordinates    |                                              | 3969..4868(+)                                     |          |
| 2572233275 | t3m_01632 | DNA_length     |                                              | 900bp                                             |          |
| 2572233275 | t3m_01632 | Protein_length |                                              | 299aa                                             |          |
| 2572233275 | t3m_01632 | GC             |                                              |                                                   | 0.68     |
| 2572233276 | t3m_01633 | COG_category   | [S] Function unknown                         |                                                   |          |
| 2572233276 | t3m_01633 | COG2042        | Uncharacterized conserved protein            |                                                   | 5.00E-42 |
| 2572233276 | t3m_01633 | pfam04068      | RLI                                          |                                                   | 7.30E-05 |
| 2572233276 | t3m_01633 | pfam04034      | DUF367                                       |                                                   | 2.60E-31 |
| 2572233276 | t3m_01633 | KO:K09140      | pre-rRNA-processing protein TSR3             |                                                   | 1.10E-26 |
| 2572233276 | t3m_01633 | Locus_type     |                                              | CDS                                               |          |
| 2572233276 | t3m_01633 | Product_name   |                                              | Uncharacterized conserved protein                 |          |
| 2572233276 | t3m_01633 | Scaffold       |                                              | t3m_contig_70_652_len_12777_read_count_1101433.48 |          |
| 2572233276 | t3m_01633 | Coordinates    |                                              | 4960..5535(-)                                     |          |
| 2572233276 | t3m_01633 | DNA_length     |                                              | 576bp                                             |          |
| 2572233276 | t3m_01633 | Protein_length |                                              | 191aa                                             |          |
| 2572233276 | t3m_01633 | GC             |                                              |                                                   | 0.7      |
| 2572233277 | t3m_01634 | Metacyc        | PWY66-373: sucrose degradation V (mammalian) |                                                   |          |
| 2572233277 | t3m_01634 | Metacyc        | SUCSYN-PWY: sucrose biosynthesis             |                                                   |          |
| 2572233277 | t3m_01634 | Metacyc        | P341-PWY: glycolysis V (Pyrococcus)          |                                                   |          |

|            |           |                |                                                                            |  |          |
|------------|-----------|----------------|----------------------------------------------------------------------------|--|----------|
| 2572233277 | t3m_01634 | Metacyc        | P185-PWY: formaldehyde assimilation III (dihydroxyacetone cycle)           |  |          |
| 2572233277 | t3m_01634 | Metacyc        | PWY-1042: glycolysis IV (plant cytosol)                                    |  |          |
| 2572233277 | t3m_01634 | Metacyc        | PWY-1861: formaldehyde assimilation II (RuMP Cycle)                        |  |          |
| 2572233277 | t3m_01634 | Metacyc        | CALVIN-PWY: Calvin-Benson-Bassham cycle                                    |  |          |
| 2572233277 | t3m_01634 | Metacyc        | GLUCONEO-PWY: gluconeogenesis I                                            |  |          |
| 2572233277 | t3m_01634 | Metacyc        | PWY-6142: gluconeogenesis II (<i>Methanobacterium thermoautotrophicum</i>) |  |          |
| 2572233277 | t3m_01634 | Metacyc        | ANAGLYCOLYSIS-PWY: glycolysis III (glucokinase)                            |  |          |
| 2572233277 | t3m_01634 | Metacyc        | PWY-5484: glycolysis II (from fructose-6P)                                 |  |          |
| 2572233277 | t3m_01634 | Metacyc        | GLYCOLYSIS: glycolysis I                                                   |  |          |
| 2572233277 | t3m_01634 | COG_category   | [G] Carbohydrate transport and metabolism                                  |  |          |
| 2572233277 | t3m_01634 | COG1830        | DhnA-type fructose-1,6-bisphosphate aldolase and related enzymes           |  | 6.00E-50 |
| 2572233277 | t3m_01634 | pfam01791      | DeoC                                                                       |  | 4.20E-35 |
| 2572233277 | t3m_01634 | EC:4.1.2.13    | Fructose-bisphosphate aldolase.                                            |  |          |
| 2572233277 | t3m_01634 | KO:K11645      | fructose-bisphosphate aldolase, class I [EC:4.1.2.13]                      |  | 0.00E+00 |
| 2572233277 | t3m_01634 | Locus_type     | CDS                                                                        |  |          |
| 2572233277 | t3m_01634 | Product_name   | DhnA-type fructose-1,6-bisphosphate aldolase and related enzymes           |  |          |
| 2572233277 | t3m_01634 | Scaffold       | t3m_contig_70_652_len_12777_read_count_1101433.48                          |  |          |
| 2572233277 | t3m_01634 | Coordinates    | 5498..6346(-)                                                              |  |          |
| 2572233277 | t3m_01634 | DNA_length     | 849bp                                                                      |  |          |
| 2572233277 | t3m_01634 | Protein_length | 282aa                                                                      |  |          |
| 2572233277 | t3m_01634 | GC             |                                                                            |  | 0.67     |
| 2572233278 | t3m_01635 | COG_category   | [P] Inorganic ion transport and metabolism                                 |  |          |
| 2572233278 | t3m_01635 | COG0053        | Predicted Co/Zn/Cd cation transporters                                     |  | 5.00E-24 |
| 2572233278 | t3m_01635 | pfam01545      | Cation_efflux                                                              |  | 1.60E-40 |
| 2572233278 | t3m_01635 | TIGR01297      | cation diffusion facilitator family transporter                            |  | 5.70E-42 |
| 2572233278 | t3m_01635 | Locus_type     | CDS                                                                        |  |          |
| 2572233278 | t3m_01635 | Product_name   | Predicted Co/Zn/Cd cation transporters                                     |  |          |
| 2572233278 | t3m_01635 | Scaffold       | t3m_contig_70_652_len_12777_read_count_1101433.48                          |  |          |
| 2572233278 | t3m_01635 | Coordinates    | 6669..7553(+)                                                              |  |          |
| 2572233278 | t3m_01635 | DNA_length     | 885bp                                                                      |  |          |
| 2572233278 | t3m_01635 | Protein_length | 294aa                                                                      |  |          |
| 2572233278 | t3m_01635 | GC             |                                                                            |  | 0.68     |
| 2572233278 | t3m_01635 | Transmembrane  | Yes                                                                        |  |          |

|            |           |                |                                                            |          |
|------------|-----------|----------------|------------------------------------------------------------|----------|
| 2572233279 | t3m_01636 | COG_category   | [G] Carbohydrate transport and metabolism                  |          |
| 2572233279 | t3m_01636 | COG2814        | Arabinose efflux permease                                  | 6.00E-07 |
| 2572233279 | t3m_01636 | pfam07690      | MFS_1                                                      | 2.90E-13 |
| 2572233279 | t3m_01636 | Locus_type     | CDS                                                        |          |
| 2572233279 | t3m_01636 | Product_name   | Arabinose efflux permease                                  |          |
| 2572233279 | t3m_01636 | Scaffold       | t3m_contig_70_652_len_12777_read_count_1101433.48          |          |
| 2572233279 | t3m_01636 | Coordinates    | 7534..8799(-)                                              |          |
| 2572233279 | t3m_01636 | DNA_length     | 1266bp                                                     |          |
| 2572233279 | t3m_01636 | Protein_length | 421aa                                                      |          |
| 2572233279 | t3m_01636 | GC             |                                                            | 0.68     |
| 2572233279 | t3m_01636 | Transmembrane  | Yes                                                        |          |
|            |           |                |                                                            |          |
| 2572233280 | t3m_01637 | Metacyc        | PWY-5386: methylglyoxal degradation I                      |          |
| 2572233280 | t3m_01637 | COG_category   | [E] Amino acid transport and metabolism                    |          |
| 2572233280 | t3m_01637 | COG0346        | Lactoylglutathione lyase and related lyases                | 1.00E-07 |
| 2572233280 | t3m_01637 | pfam00903      | Glyoxalase                                                 | 2.00E-16 |
| 2572233280 | t3m_01637 | EC:4.4.1.5     | Lactoylglutathione lyase.                                  |          |
| 2572233280 | t3m_01637 | TIGR00068      | lactoylglutathione lyase                                   | 1.20E-29 |
| 2572233280 | t3m_01637 | KO:K01759      | lactoylglutathione lyase [EC:4.4.1.5]                      | 2.30E-19 |
| 2572233280 | t3m_01637 | Locus_type     | CDS                                                        |          |
| 2572233280 | t3m_01637 | Product_name   | Lactoylglutathione lyase and related lyases                |          |
| 2572233280 | t3m_01637 | Scaffold       | t3m_contig_70_652_len_12777_read_count_1101433.48          |          |
| 2572233280 | t3m_01637 | Coordinates    | 8810..9199(-)                                              |          |
| 2572233280 | t3m_01637 | DNA_length     | 390bp                                                      |          |
| 2572233280 | t3m_01637 | Protein_length | 129aa                                                      |          |
| 2572233280 | t3m_01637 | GC             |                                                            | 0.65     |
|            |           |                |                                                            |          |
| 2572233281 | t3m_01638 | KEGG_module    | M00121: Heme biosynthesis, glutamate => protoheme/siroheme |          |
| 2572233281 | t3m_01638 | KEGG_module    | M00360: Aminoacyl-tRNA biosynthesis, prokaryotes           |          |
| 2572233281 | t3m_01638 | KEGG_module    | M00359: Aminoacyl-tRNA biosynthesis, eukaryotes            |          |
| 2572233281 | t3m_01638 | Metacyc        | PWY-5188: tetrapyrrole biosynthesis I (from glutamate)     |          |
| 2572233281 | t3m_01638 | Metacyc        | TRNA-CHARGING-PWY: tRNA charging                           |          |
| 2572233281 | t3m_01638 | IMG_pathway    | 350: tRNA-dependent glutamine synthesis                    |          |

|            |           |                |                                                          |          |
|------------|-----------|----------------|----------------------------------------------------------|----------|
| 2572233281 | t3m_01638 | IMG_pathway    | 490: L-glutamate ligation to tRNA(Glu)                   |          |
| 2572233281 | t3m_01638 | COG_category   | [J] Translation, ribosomal structure and biogenesis      |          |
| 2572233281 | t3m_01638 | COG0008        | Glutamyl- and glutaminyl-tRNA synthetases                | 1.00E-66 |
| 2572233281 | t3m_01638 | pfam03950      | tRNA-synt_1c_C                                           | 1.80E-20 |
| 2572233281 | t3m_01638 | pfam00749      | tRNA-synt_1c                                             | 1.30E-52 |
| 2572233281 | t3m_01638 | EC:6.1.1.17    | Glutamate--tRNA ligase.                                  |          |
| 2572233281 | t3m_01638 | TIGR00463      | glutamyl-tRNA synthetase, archaeal and eukaryotic family | 0.00E+00 |
| 2572233281 | t3m_01638 | KO:K01885      | glutamyl-tRNA synthetase [EC:6.1.1.17]                   | 0.00E+00 |
| 2572233281 | t3m_01638 | ITERM:00398    | glutamyl-tRNA synthetase (EC 6.1.1.17)                   |          |
| 2572233281 | t3m_01638 | Locus_type     | CDS                                                      |          |
| 2572233281 | t3m_01638 | Product_name   | glutamyl-tRNA synthetase (EC 6.1.1.17)                   |          |
| 2572233281 | t3m_01638 | Scaffold       | t3m_contig_70_652_len_12777_read_count_1101433.48        |          |
| 2572233281 | t3m_01638 | Coordinates    | 9251..10981(-)                                           |          |
| 2572233281 | t3m_01638 | DNA_length     | 1731bp                                                   |          |
| 2572233281 | t3m_01638 | Protein_length | 576aa                                                    |          |
| 2572233281 | t3m_01638 | GC             |                                                          | 0.69     |
| 2572233282 | t3m_01639 | Locus_type     | CDS                                                      |          |
| 2572233282 | t3m_01639 | Product_name   | hypothetical protein                                     |          |
| 2572233282 | t3m_01639 | Scaffold       | t3m_contig_70_652_len_12777_read_count_1101433.48        |          |
| 2572233282 | t3m_01639 | Coordinates    | 11005..11790(-)                                          |          |
| 2572233282 | t3m_01639 | DNA_length     | 786bp                                                    |          |
| 2572233282 | t3m_01639 | Protein_length | 261aa                                                    |          |
| 2572233282 | t3m_01639 | GC             |                                                          | 0.7      |
| 2572233283 | t3m_01640 | COG_category   | [J] Translation, ribosomal structure and biogenesis      |          |
| 2572233283 | t3m_01640 | COG2023        | RNase P subunit RPR2                                     | 4.00E-16 |
| 2572233283 | t3m_01640 | pfam04032      | Rpr2                                                     | 1.80E-14 |
| 2572233283 | t3m_01640 | Locus_type     | CDS                                                      |          |
| 2572233283 | t3m_01640 | Product_name   | RNase P subunit RPR2                                     |          |
| 2572233283 | t3m_01640 | Scaffold       | t3m_contig_70_652_len_12777_read_count_1101433.48        |          |
| 2572233283 | t3m_01640 | Coordinates    | 12278..12685(+)                                          |          |
| 2572233283 | t3m_01640 | DNA_length     | 408bp                                                    |          |
| 2572233283 | t3m_01640 | Protein_length | 135aa                                                    |          |

|            |           |                |                                                   |      |
|------------|-----------|----------------|---------------------------------------------------|------|
| 2572233283 | t3m_01640 | GC             |                                                   | 0.67 |
| 2572233284 | t3m_01641 | Locus_type     | CDS                                               |      |
| 2572233284 | t3m_01641 | Product_name   | hypothetical protein                              |      |
| 2572233284 | t3m_01641 | Scaffold       | t3m_contig_70_663_len_12684_read_count_1130802.49 |      |
| 2572233284 | t3m_01641 | Coordinates    | 1..1380(-)                                        |      |
| 2572233284 | t3m_01641 | DNA_length     | 1380bp                                            |      |
| 2572233284 | t3m_01641 | Protein_length | 460aa                                             |      |
| 2572233284 | t3m_01641 | GC             |                                                   | 0.63 |
| 2572233285 | t3m_01642 | Locus_type     | CDS                                               |      |
| 2572233285 | t3m_01642 | Product_name   | hypothetical protein                              |      |
| 2572233285 | t3m_01642 | Scaffold       | t3m_contig_70_663_len_12684_read_count_1130802.49 |      |
| 2572233285 | t3m_01642 | Coordinates    | 1541..1699(+)                                     |      |
| 2572233285 | t3m_01642 | DNA_length     | 159bp                                             |      |
| 2572233285 | t3m_01642 | Protein_length | 52aa                                              |      |
| 2572233285 | t3m_01642 | GC             |                                                   | 0.65 |
| 2572233286 | t3m_01643 | Locus_type     | CDS                                               |      |
| 2572233286 | t3m_01643 | Product_name   | hypothetical protein                              |      |
| 2572233286 | t3m_01643 | Scaffold       | t3m_contig_70_663_len_12684_read_count_1130802.49 |      |
| 2572233286 | t3m_01643 | Coordinates    | 2767..3381(+)                                     |      |
| 2572233286 | t3m_01643 | DNA_length     | 615bp                                             |      |
| 2572233286 | t3m_01643 | Protein_length | 204aa                                             |      |
| 2572233286 | t3m_01643 | GC             |                                                   | 0.67 |
| 2572233286 | t3m_01643 | Signal_peptide | Yes                                               |      |
| 2572233286 | t3m_01643 | Transmembrane  | Yes                                               |      |
| 2572233287 | t3m_01644 | Locus_type     | CDS                                               |      |
| 2572233287 | t3m_01644 | Product_name   | hypothetical protein                              |      |
| 2572233287 | t3m_01644 | Scaffold       | t3m_contig_70_663_len_12684_read_count_1130802.49 |      |
| 2572233287 | t3m_01644 | Coordinates    | 3536..4126(+)                                     |      |
| 2572233287 | t3m_01644 | DNA_length     | 591bp                                             |      |
| 2572233287 | t3m_01644 | Protein_length | 196aa                                             |      |

|            |           |                |                                                   |          |
|------------|-----------|----------------|---------------------------------------------------|----------|
| 2572233287 | t3m_01644 | GC             |                                                   | 0.69     |
| 2572233287 | t3m_01644 | Signal_peptide | Yes                                               |          |
| 2572233287 | t3m_01644 | Transmembrane  | Yes                                               |          |
| 2572233288 | t3m_01645 | Locus_type     | CDS                                               |          |
| 2572233288 | t3m_01645 | Product_name   | hypothetical protein                              |          |
| 2572233288 | t3m_01645 | Scaffold       | t3m_contig_70_663_len_12684_read_count_1130802.49 |          |
| 2572233288 | t3m_01645 | Coordinates    | 4158..4703(+)                                     |          |
| 2572233288 | t3m_01645 | DNA_length     | 546bp                                             |          |
| 2572233288 | t3m_01645 | Protein_length | 181aa                                             |          |
| 2572233288 | t3m_01645 | GC             |                                                   | 0.66     |
| 2572233288 | t3m_01645 | Transmembrane  | Yes                                               |          |
| 2572233289 | t3m_01646 | COG_category   | [P] Inorganic ion transport and metabolism        |          |
| 2572233289 | t3m_01646 | COG0306        | Phosphate/sulphate permeases                      | 4.00E-38 |
| 2572233289 | t3m_01646 | pfam01384      | PHO4                                              | 1.60E-44 |
| 2572233289 | t3m_01646 | KO:K03306      | inorganic phosphate transporter, PiT family       | 3.50E-41 |
| 2572233289 | t3m_01646 | Locus_type     | CDS                                               |          |
| 2572233289 | t3m_01646 | Product_name   | Phosphate/sulphate permeases                      |          |
| 2572233289 | t3m_01646 | Scaffold       | t3m_contig_70_663_len_12684_read_count_1130802.49 |          |
| 2572233289 | t3m_01646 | Coordinates    | 4874..5857(+)                                     |          |
| 2572233289 | t3m_01646 | DNA_length     | 984bp                                             |          |
| 2572233289 | t3m_01646 | Protein_length | 327aa                                             |          |
| 2572233289 | t3m_01646 | GC             |                                                   | 0.69     |
| 2572233289 | t3m_01646 | Transmembrane  | Yes                                               |          |
| 2572233290 | t3m_01647 | COG_category   | [R] General function prediction only              |          |
| 2572233290 | t3m_01647 | COG1741        | Pirin-related protein                             | 3.00E-57 |
| 2572233290 | t3m_01647 | pfam02678      | Pirin                                             | 3.20E-37 |
| 2572233290 | t3m_01647 | pfam05726      | Pirin_C                                           | 3.10E-29 |
| 2572233290 | t3m_01647 | Locus_type     | CDS                                               |          |
| 2572233290 | t3m_01647 | Product_name   | Pirin-related protein                             |          |
| 2572233290 | t3m_01647 | Scaffold       | t3m_contig_70_663_len_12684_read_count_1130802.49 |          |
| 2572233290 | t3m_01647 | Coordinates    | 5950..6825(+)                                     |          |

|            |           |                |                                                                       |           |
|------------|-----------|----------------|-----------------------------------------------------------------------|-----------|
| 2572233290 | t3m_01647 | DNA_length     | 876bp                                                                 |           |
| 2572233290 | t3m_01647 | Protein_length | 291aa                                                                 |           |
| 2572233290 | t3m_01647 | GC             |                                                                       | 0.66      |
| 2572233291 | t3m_01648 | COG_category   | [P] Inorganic ion transport and metabolism                            |           |
| 2572233291 | t3m_01648 | COG3376        | High-affinity nickel permease                                         | 4.00E-92  |
| 2572233291 | t3m_01648 | pfam03824      | NicO                                                                  | 1.30E-76  |
| 2572233291 | t3m_01648 | TIGR00802      | high-affinity nickel-transporter, HoxN/HupN/NixA family               | 5.30E-104 |
| 2572233291 | t3m_01648 | KO:K07241      | high-affinity nickel-transport protein                                | 0.00E+00  |
| 2572233291 | t3m_01648 | Locus_type     | CDS                                                                   |           |
| 2572233291 | t3m_01648 | Product_name   | high-affinity nickel-transporter, HoxN/HupN/NixA family               |           |
| 2572233291 | t3m_01648 | Scaffold       | t3m_contig_70_663_len_12684_read_count_1130802.49                     |           |
| 2572233291 | t3m_01648 | Coordinates    | 6971..8068(+)                                                         |           |
| 2572233291 | t3m_01648 | DNA_length     | 1098bp                                                                |           |
| 2572233291 | t3m_01648 | Protein_length | 365aa                                                                 |           |
| 2572233291 | t3m_01648 | GC             |                                                                       | 0.65      |
| 2572233291 | t3m_01648 | Transmembrane  | Yes                                                                   |           |
| 2572233292 | t3m_01649 | COG_category   | [K] Transcription                                                     |           |
| 2572233292 | t3m_01649 | COG0864        | Predicted transcriptional regulators containing the CopG/Arc/MetJ DNA | 1.00E-20  |
| 2572233292 | t3m_01649 | pfam08753      | NikR_C                                                                | 3.30E-17  |
| 2572233292 | t3m_01649 | pfam01402      | RHH_1                                                                 | 2.40E-06  |
| 2572233292 | t3m_01649 | TIGR02793      | nickel-responsive transcriptional regulator NikR                      | 1.60E-26  |
| 2572233292 | t3m_01649 | KO:K07722      | CopG family transcriptional regulator, nickel-responsive regulator    | 1.50E-22  |
| 2572233292 | t3m_01649 | Locus_type     | CDS                                                                   |           |
| 2572233292 | t3m_01649 | Product_name   | Predicted transcriptional regulators containing the CopG/Arc/MetJ DNA |           |
| 2572233292 | t3m_01649 | Scaffold       | t3m_contig_70_663_len_12684_read_count_1130802.49                     |           |
| 2572233292 | t3m_01649 | Coordinates    | 8065..8523(+)                                                         |           |
| 2572233292 | t3m_01649 | DNA_length     | 459bp                                                                 |           |
| 2572233292 | t3m_01649 | Protein_length | 152aa                                                                 |           |
| 2572233292 | t3m_01649 | GC             |                                                                       | 0.71      |
| 2572233293 | t3m_01650 | COG_category   | [E] Amino acid transport and metabolism                               |           |
| 2572233293 | t3m_01650 | COG2309        | Leucyl aminopeptidase (aminopeptidase T)                              | 1.00E-12  |

|            |           |                |                                                       |                                                       |          |
|------------|-----------|----------------|-------------------------------------------------------|-------------------------------------------------------|----------|
| 2572233293 | t3m_01650 | pfam02073      | Peptidase_M29                                         |                                                       | 4.20E-07 |
| 2572233293 | t3m_01650 | Locus_type     |                                                       | CDS                                                   |          |
| 2572233293 | t3m_01650 | Product_name   |                                                       | Leucyl aminopeptidase (aminopeptidase T)              |          |
| 2572233293 | t3m_01650 | Scaffold       |                                                       | t3m_contig_70_663_len_12684_read_count_1130802.49     |          |
| 2572233293 | t3m_01650 | Coordinates    |                                                       | 8520..9671(+)                                         |          |
| 2572233293 | t3m_01650 | DNA_length     |                                                       | 1152bp                                                |          |
| 2572233293 | t3m_01650 | Protein_length |                                                       | 383aa                                                 |          |
| 2572233293 | t3m_01650 | GC             |                                                       |                                                       | 0.72     |
| 2572233294 | t3m_01651 | COG_category   | [E] Amino acid transport and metabolism               |                                                       |          |
| 2572233294 | t3m_01651 | COG0685        | 5,10-methylenetetrahydrofolate reductase              |                                                       | 9.00E-10 |
| 2572233294 | t3m_01651 | Locus_type     |                                                       | CDS                                                   |          |
| 2572233294 | t3m_01651 | Product_name   |                                                       | 5,10-methylenetetrahydrofolate reductase              |          |
| 2572233294 | t3m_01651 | Scaffold       |                                                       | t3m_contig_70_663_len_12684_read_count_1130802.49     |          |
| 2572233294 | t3m_01651 | Coordinates    |                                                       | 9720..10649(-)                                        |          |
| 2572233294 | t3m_01651 | DNA_length     |                                                       | 930bp                                                 |          |
| 2572233294 | t3m_01651 | Protein_length |                                                       | 309aa                                                 |          |
| 2572233294 | t3m_01651 | GC             |                                                       |                                                       | 0.69     |
| 2572233295 | t3m_01652 | KEGG_module    | M00248: Putative antibiotic transport system          |                                                       |          |
| 2572233295 | t3m_01652 | COG_category   | [V] Defense mechanisms                                |                                                       |          |
| 2572233295 | t3m_01652 | COG1131        | ABC-type multidrug transport system, ATPase component |                                                       | 1.00E-71 |
| 2572233295 | t3m_01652 | pfam00005      | ABC_tran                                              |                                                       | 6.00E-28 |
| 2572233295 | t3m_01652 | KO:K09687      | antibiotic transport system ATP-binding protein       |                                                       | 0.00E+00 |
| 2572233295 | t3m_01652 | Locus_type     |                                                       | CDS                                                   |          |
| 2572233295 | t3m_01652 | Product_name   |                                                       | ABC-type multidrug transport system, ATPase component |          |
| 2572233295 | t3m_01652 | Scaffold       |                                                       | t3m_contig_70_663_len_12684_read_count_1130802.49     |          |
| 2572233295 | t3m_01652 | Coordinates    |                                                       | 10759..11805(+)                                       |          |
| 2572233295 | t3m_01652 | DNA_length     |                                                       | 1047bp                                                |          |
| 2572233295 | t3m_01652 | Protein_length |                                                       | 348aa                                                 |          |
| 2572233295 | t3m_01652 | GC             |                                                       |                                                       | 0.67     |
| 2572233296 | t3m_01653 | pfam12698      | ABC2_membrane_3                                       |                                                       | 4.60E-25 |
| 2572233296 | t3m_01653 | Locus_type     |                                                       | CDS                                                   |          |



|            |           |                |                                                                  |          |
|------------|-----------|----------------|------------------------------------------------------------------|----------|
| 2572233296 | t3m_01653 | Product_name   | ABC-2 family transporter protein                                 |          |
| 2572233296 | t3m_01653 | Scaffold       | t3m_contig_70_663_len_12684_read_count_1130802.49                |          |
| 2572233296 | t3m_01653 | Coordinates    | 11802..12683(+)                                                  |          |
| 2572233296 | t3m_01653 | DNA_length     | 882bp                                                            |          |
| 2572233296 | t3m_01653 | Protein_length | 294aa                                                            |          |
| 2572233296 | t3m_01653 | GC             |                                                                  | 0.64     |
| 2572233296 | t3m_01653 | Transmembrane  | Yes                                                              |          |
|            |           |                |                                                                  |          |
| 2572233297 | t3m_01654 | Locus_type     | CDS                                                              |          |
| 2572233297 | t3m_01654 | Product_name   | hypothetical protein                                             |          |
| 2572233297 | t3m_01654 | Scaffold       | t3m_contig_70_671_len_12624_read_count_988736.50                 |          |
| 2572233297 | t3m_01654 | Coordinates    | 3..188(+)                                                        |          |
| 2572233297 | t3m_01654 | DNA_length     | 186bp                                                            |          |
| 2572233297 | t3m_01654 | Protein_length | 61aa                                                             |          |
| 2572233297 | t3m_01654 | GC             |                                                                  | 0.55     |
|            |           |                |                                                                  |          |
| 2572233298 | t3m_01655 | Locus_type     | CDS                                                              |          |
| 2572233298 | t3m_01655 | Product_name   | hypothetical protein                                             |          |
| 2572233298 | t3m_01655 | Scaffold       | t3m_contig_70_671_len_12624_read_count_988736.50                 |          |
| 2572233298 | t3m_01655 | Coordinates    | 208..603(+)                                                      |          |
| 2572233298 | t3m_01655 | DNA_length     | 396bp                                                            |          |
| 2572233298 | t3m_01655 | Protein_length | 131aa                                                            |          |
| 2572233298 | t3m_01655 | GC             |                                                                  | 0.65     |
|            |           |                |                                                                  |          |
| 2572233299 | t3m_01656 | COG_category   | [J] Translation, ribosomal structure and biogenesis              |          |
| 2572233299 | t3m_01656 | COG1670        | Acetyltransferases, including N-acetylases of ribosomal proteins | 7.00E-22 |
| 2572233299 | t3m_01656 | pfam13302      | Acetyltransf_3                                                   | 4.90E-23 |
| 2572233299 | t3m_01656 | EC:2.3.1.128   | Ribosomal-protein-alanine N-acetyltransferase.                   |          |
| 2572233299 | t3m_01656 | KO:K00676      | ribosomal-protein-alanine N-acetyltransferase [EC:2.3.1.128]     | 2.80E-15 |
| 2572233299 | t3m_01656 | Locus_type     | CDS                                                              |          |
| 2572233299 | t3m_01656 | Product_name   | Acetyltransferases, including N-acetylases of ribosomal proteins |          |
| 2572233299 | t3m_01656 | Scaffold       | t3m_contig_70_671_len_12624_read_count_988736.50                 |          |
| 2572233299 | t3m_01656 | Coordinates    | 610..1161(+)                                                     |          |
| 2572233299 | t3m_01656 | DNA_length     | 552bp                                                            |          |

|            |           |                |                                                                                        |  |          |
|------------|-----------|----------------|----------------------------------------------------------------------------------------|--|----------|
| 2572233299 | t3m_01656 | Protein_length | 183aa                                                                                  |  |          |
| 2572233299 | t3m_01656 | GC             |                                                                                        |  | 0.69     |
| 2572233300 | t3m_01657 | COG_category   | [R] General function prediction only                                                   |  |          |
| 2572233300 | t3m_01657 | COG2872        | Predicted metal-dependent hydrolases related to alanyl-tRNA synthetase                 |  | 3.00E-47 |
| 2572233300 | t3m_01657 | pfam01411      | tRNA-synt_2c                                                                           |  | 5.00E-10 |
| 2572233300 | t3m_01657 | pfam07973      | tRNA_SAD                                                                               |  | 1.50E-08 |
| 2572233300 | t3m_01657 | Locus_type     | CDS                                                                                    |  |          |
| 2572233300 | t3m_01657 | Product_name   | Predicted metal-dependent hydrolases related to alanyl-tRNA synthetases                |  |          |
| 2572233300 | t3m_01657 | Scaffold       | t3m_contig_70_671_len_12624_read_count_988736.50                                       |  |          |
| 2572233300 | t3m_01657 | Coordinates    | 1121..1876(-)                                                                          |  |          |
| 2572233300 | t3m_01657 | DNA_length     | 756bp                                                                                  |  |          |
| 2572233300 | t3m_01657 | Protein_length | 251aa                                                                                  |  |          |
| 2572233300 | t3m_01657 | GC             |                                                                                        |  | 0.72     |
| 2572233301 | t3m_01658 | KEGG_module    | M00295: BRCA1-associated genome surveillance complex (BASC)                            |  |          |
| 2572233301 | t3m_01658 | COG_category   | [L] Replication, recombination and repair                                              |  |          |
| 2572233301 | t3m_01658 | COG0592        | DNA polymerase sliding clamp subunit (PCNA homolog)                                    |  | 2.00E-19 |
| 2572233301 | t3m_01658 | pfam00705      | PCNA_N                                                                                 |  | 3.00E-11 |
| 2572233301 | t3m_01658 | KO:K04802      | proliferating cell nuclear antigen                                                     |  | 0.00E+00 |
| 2572233301 | t3m_01658 | Locus_type     | CDS                                                                                    |  |          |
| 2572233301 | t3m_01658 | Product_name   | DNA polymerase sliding clamp subunit (PCNA homolog)                                    |  |          |
| 2572233301 | t3m_01658 | Scaffold       | t3m_contig_70_671_len_12624_read_count_988736.50                                       |  |          |
| 2572233301 | t3m_01658 | Coordinates    | 1974..2705(+)                                                                          |  |          |
| 2572233301 | t3m_01658 | DNA_length     | 732bp                                                                                  |  |          |
| 2572233301 | t3m_01658 | Protein_length | 243aa                                                                                  |  |          |
| 2572233301 | t3m_01658 | GC             |                                                                                        |  | 0.64     |
| 2572233302 | t3m_01659 | KEGG_module    | M00088: Ketone body biosynthesis, acetyl-CoA => acetoacetate/3-hydroxybutyrate/acetone |  |          |
| 2572233302 | t3m_01659 | KEGG_module    | M00374: Dicarboxylate-hydroxybutyrate cycle                                            |  |          |
| 2572233302 | t3m_01659 | KEGG_module    | M00375: Hydroxypropionate-hydroxybutyrate cycle                                        |  |          |
| 2572233302 | t3m_01659 | KEGG_module    | M00373: Ethylmalonyl pathway                                                           |  |          |
| 2572233302 | t3m_01659 | KEGG_module    | M00095: C5 isoprenoid biosynthesis, mevalonate pathway                                 |  |          |
| 2572233302 | t3m_01659 | Metacyc        | PWY-6883: pyruvate fermentation to butanol II                                          |  |          |

|            |           |                |                                                                |           |
|------------|-----------|----------------|----------------------------------------------------------------|-----------|
| 2572233302 | t3m_01659 | Metacyc        | PWY66-367: ketogenesis                                         |           |
| 2572233302 | t3m_01659 | Metacyc        | ILEUDEG-PWY: isoleucine degradation I                          |           |
| 2572233302 | t3m_01659 | Metacyc        | PWY-922: mevalonate pathway I                                  |           |
| 2572233302 | t3m_01659 | Metacyc        | PWY-5741: ethylmalonyl pathway                                 |           |
| 2572233302 | t3m_01659 | Metacyc        | CENTFERM-PWY: pyruvate fermentation to butanoate               |           |
| 2572233302 | t3m_01659 | Metacyc        | PWY-6583: pyruvate fermentation to butanol I                   |           |
| 2572233302 | t3m_01659 | Metacyc        | ACETOACETATE-DEG-PWY: acetoacetate degradation (to acetyl CoA) |           |
| 2572233302 | t3m_01659 | Metacyc        | PWY-6174: mevalonate pathway II (archaea)                      |           |
| 2572233302 | t3m_01659 | Metacyc        | PWY-6876: isopropanol biosynthesis                             |           |
| 2572233302 | t3m_01659 | Metacyc        | PWY-5676: acetyl-CoA fermentation to butyrate II               |           |
| 2572233302 | t3m_01659 | Metacyc        | PWY-6588: pyruvate fermentation to acetone                     |           |
| 2572233302 | t3m_01659 | Metacyc        | PWY-5789: 3-hydroxypropionate/4-hydroxybutyrate cycle          |           |
| 2572233302 | t3m_01659 | Metacyc        | P163-PWY: lysine fermentation to acetate and butyrate          |           |
| 2572233302 | t3m_01659 | Metacyc        | PWY66-368: ketolysis                                           |           |
| 2572233302 | t3m_01659 | Metacyc        | PWY1-3: polyhydroxybutyrate biosynthesis                       |           |
| 2572233302 | t3m_01659 | Metacyc        | PWY-5109: 2-methylbutyrate biosynthesis                        |           |
| 2572233302 | t3m_01659 | Metacyc        | PWY-6863: pyruvate fermentation to hexanol                     |           |
| 2572233302 | t3m_01659 | Metacyc        | PWY-7003: glycerol degradation to butanol                      |           |
| 2572233302 | t3m_01659 | Metacyc        | PWY-5177: glutaryl-CoA degradation                             |           |
| 2572233302 | t3m_01659 | COG_category   | [I] Lipid transport and metabolism                             |           |
| 2572233302 | t3m_01659 | COG0183        | Acetyl-CoA acetyltransferase                                   | 8.00E-79  |
| 2572233302 | t3m_01659 | pfam00108      | Thiolase_N                                                     | 3.80E-82  |
| 2572233302 | t3m_01659 | pfam02803      | Thiolase_C                                                     | 1.30E-38  |
| 2572233302 | t3m_01659 | EC:2.3.1.9     | Acetyl-CoA C-acetyltransferase.                                |           |
| 2572233302 | t3m_01659 | TIGR01930      | acetyl-CoA acetyltransferases                                  | 2.10E-125 |
| 2572233302 | t3m_01659 | KO:K00626      | acetyl-CoA C-acetyltransferase [EC:2.3.1.9]                    | 0.00E+00  |
| 2572233302 | t3m_01659 | Locus_type     | CDS                                                            |           |
| 2572233302 | t3m_01659 | Product_name   | acetyl-CoA acetyltransferases                                  |           |
| 2572233302 | t3m_01659 | Scaffold       | t3m_contig_70_671_len_12624_read_count_988736.50               |           |
| 2572233302 | t3m_01659 | Coordinates    | 2792..3997(+)                                                  |           |
| 2572233302 | t3m_01659 | DNA_length     | 1206bp                                                         |           |
| 2572233302 | t3m_01659 | Protein_length | 401aa                                                          |           |
| 2572233302 | t3m_01659 | GC             |                                                                | 0.7       |

|            |           |                |                                                                            |          |
|------------|-----------|----------------|----------------------------------------------------------------------------|----------|
| 2572233303 | t3m_01660 | Metacyc        | PWY1G-0: mycothiol biosynthesis                                            |          |
| 2572233303 | t3m_01660 | IMG_pathway    | 488: L-cysteine ligation to tRNA(Cys)                                      |          |
| 2572233303 | t3m_01660 | COG_category   | [J] Translation, ribosomal structure and biogenesis                        |          |
| 2572233303 | t3m_01660 | COG0215        | Cysteinyl-tRNA synthetase                                                  | 1.00E-87 |
| 2572233303 | t3m_01660 | pfam01406      | tRNA-synt_1e                                                               | 8.30E-73 |
| 2572233303 | t3m_01660 | EC:6.3.1.13    | L-cysteine:1D-myo-inositol 2-amino-2-deoxy-alpha-D-glucopyranoside ligase. |          |
| 2572233303 | t3m_01660 | KO:K15526      | L-cysteine:1D-myo-inositol 2-amino-2-deoxy-alpha-D-glucopyranoside l       | 0.00E+00 |
| 2572233303 | t3m_01660 | ITERM:00404    | cysteinyl-tRNA synthetase (EC 6.1.1.16)                                    |          |
| 2572233303 | t3m_01660 | Locus_type     | CDS                                                                        |          |
| 2572233303 | t3m_01660 | Product_name   | cysteinyl-tRNA synthetase (EC 6.1.1.16)                                    |          |
| 2572233303 | t3m_01660 | Scaffold       | t3m_contig_70_671_len_12624_read_count_988736.50                           |          |
| 2572233303 | t3m_01660 | Coordinates    | 3975..5216(-)                                                              |          |
| 2572233303 | t3m_01660 | DNA_length     | 1242bp                                                                     |          |
| 2572233303 | t3m_01660 | Protein_length | 413aa                                                                      |          |
| 2572233303 | t3m_01660 | GC             |                                                                            | 0.72     |
|            |           |                |                                                                            |          |
| 2572233304 | t3m_01661 | pfam01037      | AsnC_trans_reg                                                             | 4.50E-16 |
| 2572233304 | t3m_01661 | Locus_type     | CDS                                                                        |          |
| 2572233304 | t3m_01661 | Product_name   | AsnC family                                                                |          |
| 2572233304 | t3m_01661 | Scaffold       | t3m_contig_70_671_len_12624_read_count_988736.50                           |          |
| 2572233304 | t3m_01661 | Coordinates    | 5333..5569(+)                                                              |          |
| 2572233304 | t3m_01661 | DNA_length     | 237bp                                                                      |          |
| 2572233304 | t3m_01661 | Protein_length | 78aa                                                                       |          |
| 2572233304 | t3m_01661 | GC             |                                                                            | 0.67     |
|            |           |                |                                                                            |          |
| 2572233305 | t3m_01662 | COG_category   | [O] Posttranslational modification, protein turnover, chaperones           |          |
| 2572233305 | t3m_01662 | COG1225        | Peroxiredoxin                                                              | 2.00E-40 |
| 2572233305 | t3m_01662 | pfam00578      | AhpC-TSA                                                                   | 6.20E-38 |
| 2572233305 | t3m_01662 | EC:1.11.1.15   | Peroxiredoxin.                                                             |          |
| 2572233305 | t3m_01662 | KO:K03564      | peroxiredoxin Q/BCP [EC:1.11.1.15]                                         | 8.70E-31 |
| 2572233305 | t3m_01662 | Locus_type     | CDS                                                                        |          |
| 2572233305 | t3m_01662 | Product_name   | Peroxiredoxin                                                              |          |
| 2572233305 | t3m_01662 | Scaffold       | t3m_contig_70_671_len_12624_read_count_988736.50                           |          |
| 2572233305 | t3m_01662 | Coordinates    | 5624..6064(+)                                                              |          |

|            |           |                |                                                                               |          |
|------------|-----------|----------------|-------------------------------------------------------------------------------|----------|
| 2572233305 | t3m_01662 | DNA_length     | 441bp                                                                         |          |
| 2572233305 | t3m_01662 | Protein_length | 146aa                                                                         |          |
| 2572233305 | t3m_01662 | GC             |                                                                               | 0.68     |
| 2572233306 | t3m_01663 | pfam03176      | MMPL                                                                          | 1.80E-35 |
| 2572233306 | t3m_01663 | pfam03176      | MMPL                                                                          | 3.60E-38 |
| 2572233306 | t3m_01663 | Locus_type     | CDS                                                                           |          |
| 2572233306 | t3m_01663 | Product_name   | MMPL family                                                                   |          |
| 2572233306 | t3m_01663 | Scaffold       | t3m_contig_70_671_len_12624_read_count_988736.50                              |          |
| 2572233306 | t3m_01663 | Coordinates    | 6054..9143(-)                                                                 |          |
| 2572233306 | t3m_01663 | DNA_length     | 3090bp                                                                        |          |
| 2572233306 | t3m_01663 | Protein_length | 1029aa                                                                        |          |
| 2572233306 | t3m_01663 | GC             |                                                                               | 0.69     |
| 2572233306 | t3m_01663 | Transmembrane  | Yes                                                                           |          |
| 2572233307 | t3m_01664 | KEGG_module    | M00425: H/ACA ribonucleoprotein complex                                       |          |
| 2572233307 | t3m_01664 | Metacyc        | RIBOKIN-PWY: ribose degradation                                               |          |
| 2572233307 | t3m_01664 | COG_category   | [J] Translation, ribosomal structure and biogenesis                           |          |
| 2572233307 | t3m_01664 | COG0130        | Pseudouridine synthase                                                        | 4.00E-56 |
| 2572233307 | t3m_01664 | pfam01509      | TruB_N                                                                        | 3.30E-10 |
| 2572233307 | t3m_01664 | pfam01472      | PUA                                                                           | 5.80E-12 |
| 2572233307 | t3m_01664 | EC:5.4.99.-    | Isomerases. Intramolecular transferases (mutases). Transferring other groups. |          |
| 2572233307 | t3m_01664 | TIGR00425      | rRNA pseudouridine synthase, putative                                         | 1.50E-84 |
| 2572233307 | t3m_01664 | KO:K11131      | H/ACA ribonucleoprotein complex subunit 4 [EC:5.4.99.-]                       | 0.00E+00 |
| 2572233307 | t3m_01664 | ITERM:05206    | tRNA pseudouridine synthase B (EC 4.2.1.70)                                   |          |
| 2572233307 | t3m_01664 | Locus_type     | CDS                                                                           |          |
| 2572233307 | t3m_01664 | Product_name   | tRNA pseudouridine synthase B (EC 4.2.1.70)                                   |          |
| 2572233307 | t3m_01664 | Scaffold       | t3m_contig_70_671_len_12624_read_count_988736.50                              |          |
| 2572233307 | t3m_01664 | Coordinates    | 9175..10134(-)                                                                |          |
| 2572233307 | t3m_01664 | DNA_length     | 960bp                                                                         |          |
| 2572233307 | t3m_01664 | Protein_length | 319aa                                                                         |          |
| 2572233307 | t3m_01664 | GC             |                                                                               | 0.74     |
| 2572233308 | t3m_01665 | KEGG_module    | M00052: Pyrimidine ribonucleotide biosynthesis, UMP => UDP/UTP,CDP/CTP        |          |

|            |           |                |                                                  |          |
|------------|-----------|----------------|--------------------------------------------------|----------|
| 2572233308 | t3m_01665 | COG_category   | [F] Nucleotide transport and metabolism          |          |
| 2572233308 | t3m_01665 | COG1102        | Cytidylate kinase                                | 2.00E-33 |
| 2572233308 | t3m_01665 | pfam13207      | AAA_17                                           | 1.10E-10 |
| 2572233308 | t3m_01665 | EC:2.7.4.14    | UMP/CMP kinase.                                  |          |
| 2572233308 | t3m_01665 | TIGR02173      | cytidylate kinase, putative                      | 6.40E-36 |
| 2572233308 | t3m_01665 | KO:K00945      | cytidylate kinase [EC:2.7.4.14]                  | 1.40E-26 |
| 2572233308 | t3m_01665 | Locus_type     | CDS                                              |          |
| 2572233308 | t3m_01665 | Product_name   | cytidylate kinase, putative                      |          |
| 2572233308 | t3m_01665 | Scaffold       | t3m_contig_70_671_len_12624_read_count_988736.50 |          |
| 2572233308 | t3m_01665 | Coordinates    | 10131..10679(-)                                  |          |
| 2572233308 | t3m_01665 | DNA_length     | 549bp                                            |          |
| 2572233308 | t3m_01665 | Protein_length | 182aa                                            |          |
| 2572233308 | t3m_01665 | GC             |                                                  | 0.71     |
|            |           |                |                                                  |          |
| 2572233309 | t3m_01666 | COG_category   | [S] Function unknown                             |          |
| 2572233309 | t3m_01666 | COG1422        | Predicted membrane protein                       | 1.00E-13 |
| 2572233309 | t3m_01666 | pfam01956      | DUF106                                           | 2.10E-11 |
| 2572233309 | t3m_01666 | Locus_type     | CDS                                              |          |
| 2572233309 | t3m_01666 | Product_name   | Predicted membrane protein                       |          |
| 2572233309 | t3m_01666 | Scaffold       | t3m_contig_70_671_len_12624_read_count_988736.50 |          |
| 2572233309 | t3m_01666 | Coordinates    | 10676..11527(-)                                  |          |
| 2572233309 | t3m_01666 | DNA_length     | 852bp                                            |          |
| 2572233309 | t3m_01666 | Protein_length | 283aa                                            |          |
| 2572233309 | t3m_01666 | GC             |                                                  | 0.66     |
| 2572233309 | t3m_01666 | Transmembrane  | Yes                                              |          |
|            |           |                |                                                  |          |
| 2572233310 | t3m_01667 | pfam00344      | SecY                                             | 5.60E-69 |
| 2572233310 | t3m_01667 | Locus_type     | CDS                                              |          |
| 2572233310 | t3m_01667 | Product_name   | SecY translocase                                 |          |
| 2572233310 | t3m_01667 | Scaffold       | t3m_contig_70_671_len_12624_read_count_988736.50 |          |
| 2572233310 | t3m_01667 | Coordinates    | 11527..12621(-)                                  |          |
| 2572233310 | t3m_01667 | DNA_length     | 1095bp                                           |          |
| 2572233310 | t3m_01667 | Protein_length | 364aa                                            |          |
| 2572233310 | t3m_01667 | GC             |                                                  | 0.66     |

|            |           |                |                                                                 |          |
|------------|-----------|----------------|-----------------------------------------------------------------|----------|
| 2572233310 | t3m_01667 | Transmembrane  | Yes                                                             |          |
| 2572233311 | t3m_01668 | pfam04055      | Radical_SAM                                                     | 5.10E-18 |
| 2572233311 | t3m_01668 | Locus_type     | CDS                                                             |          |
| 2572233311 | t3m_01668 | Product_name   | Radical SAM superfamily                                         |          |
| 2572233311 | t3m_01668 | Scaffold       | t3m_contig_70_707_len_12253_read_count_885831.51                |          |
| 2572233311 | t3m_01668 | Coordinates    | 1..966(+)                                                       |          |
| 2572233311 | t3m_01668 | DNA_length     | 966bp                                                           |          |
| 2572233311 | t3m_01668 | Protein_length | 321aa                                                           |          |
| 2572233311 | t3m_01668 | GC             |                                                                 | 0.64     |
| 2572233312 | t3m_01669 | COG_category   | [R] General function prediction only                            |          |
| 2572233312 | t3m_01669 | COG1310        | Predicted metal-dependent protease of the PAD1/JAB1 superfamily | 9.00E-15 |
| 2572233312 | t3m_01669 | pfam14464      | Prok-JAB                                                        | 5.70E-15 |
| 2572233312 | t3m_01669 | Locus_type     | CDS                                                             |          |
| 2572233312 | t3m_01669 | Product_name   | Predicted metal-dependent protease of the PAD1/JAB1 superfamily |          |
| 2572233312 | t3m_01669 | Scaffold       | t3m_contig_70_707_len_12253_read_count_885831.51                |          |
| 2572233312 | t3m_01669 | Coordinates    | 996..1529(-)                                                    |          |
| 2572233312 | t3m_01669 | DNA_length     | 534bp                                                           |          |
| 2572233312 | t3m_01669 | Protein_length | 177aa                                                           |          |
| 2572233312 | t3m_01669 | GC             |                                                                 | 0.71     |
| 2572233313 | t3m_01670 | Metacyc        | NADPHOS-DEPHOS-PWY: NAD phosphorylation and dephosphorylation   |          |
| 2572233313 | t3m_01670 | Metacyc        | PWY-5083: NAD/NADH phosphorylation and dephosphorylation        |          |
| 2572233313 | t3m_01670 | COG_category   | [G] Carbohydrate transport and metabolism                       |          |
| 2572233313 | t3m_01670 | COG0061        | Predicted sugar kinase                                          | 6.00E-49 |
| 2572233313 | t3m_01670 | pfam01513      | NAD_kinase                                                      | 4.60E-43 |
| 2572233313 | t3m_01670 | EC:2.7.1.23    | NAD(+) kinase.                                                  |          |
| 2572233313 | t3m_01670 | KO:K00858      | NAD+ kinase [EC:2.7.1.23]                                       | 2.40E-44 |
| 2572233313 | t3m_01670 | Locus_type     | CDS                                                             |          |
| 2572233313 | t3m_01670 | Product_name   | Predicted sugar kinase                                          |          |
| 2572233313 | t3m_01670 | Scaffold       | t3m_contig_70_707_len_12253_read_count_885831.51                |          |
| 2572233313 | t3m_01670 | Coordinates    | 1504..2412(-)                                                   |          |
| 2572233313 | t3m_01670 | DNA_length     | 909bp                                                           |          |

|            |           |                |                                                                                       |  |          |
|------------|-----------|----------------|---------------------------------------------------------------------------------------|--|----------|
| 2572233313 | t3m_01670 | Protein_length | 302aa                                                                                 |  |          |
| 2572233313 | t3m_01670 | GC             |                                                                                       |  | 0.69     |
| 2572233314 | t3m_01671 | KEGG_module    | M00131: Inositol phosphate metabolism, Ins(1,3,4,5)P4 => Ins(1,3,4)P3 => myo-inositol |  |          |
| 2572233314 | t3m_01671 | Metacyc        | PWY-2301: <i>myo</i>-inositol biosynthesis                                            |  |          |
| 2572233314 | t3m_01671 | Metacyc        | PWY-4702: phytate degradation I                                                       |  |          |
| 2572233314 | t3m_01671 | Metacyc        | PWY-6363: D-<i>myo</i>-inositol (1,4,5)-trisphosphate degradation                     |  |          |
| 2572233314 | t3m_01671 | COG_category   | [G] Carbohydrate transport and metabolism                                             |  |          |
| 2572233314 | t3m_01671 | COG0483        | Archaeal fructose-1,6-bisphosphatase and related enzymes of inositol n                |  | 2.00E-35 |
| 2572233314 | t3m_01671 | pfam00459      | Inositol_P                                                                            |  | 1.70E-32 |
| 2572233314 | t3m_01671 | EC:3.1.3.25    | Inositol-phosphate phosphatase.                                                       |  |          |
| 2572233314 | t3m_01671 | KO:K01092      | myo-inositol-1(or 4)-monophosphatase [EC:3.1.3.25]                                    |  | 2.10E-39 |
| 2572233314 | t3m_01671 | Locus_type     | CDS                                                                                   |  |          |
| 2572233314 | t3m_01671 | Product_name   | Archaeal fructose-1,6-bisphosphatase and related enzymes of inositol m                |  |          |
| 2572233314 | t3m_01671 | Scaffold       | t3m_contig_70_707_len_12253_read_count_885831.51                                      |  |          |
| 2572233314 | t3m_01671 | Coordinates    | 2379..3191(-)                                                                         |  |          |
| 2572233314 | t3m_01671 | DNA_length     | 813bp                                                                                 |  |          |
| 2572233314 | t3m_01671 | Protein_length | 270aa                                                                                 |  |          |
| 2572233314 | t3m_01671 | GC             |                                                                                       |  | 0.7      |
| 2572233315 | t3m_01672 | COG_category   | [J] Translation, ribosomal structure and biogenesis                                   |  |          |
| 2572233315 | t3m_01672 | COG1236        | Predicted exonuclease of the beta-lactamase fold involved in RNA proc                 |  | 2.00E-81 |
| 2572233315 | t3m_01672 | pfam07521      | RMMBL                                                                                 |  | 7.70E-11 |
| 2572233315 | t3m_01672 | pfam10996      | Beta-Casp                                                                             |  | 7.30E-17 |
| 2572233315 | t3m_01672 | pfam00753      | Lactamase_B                                                                           |  | 7.40E-13 |
| 2572233315 | t3m_01672 | KO:K07577      | putative mRNA 3-end processing factor                                                 |  | 0.00E+00 |
| 2572233315 | t3m_01672 | Locus_type     | CDS                                                                                   |  |          |
| 2572233315 | t3m_01672 | Product_name   | Predicted exonuclease of the beta-lactamase fold involved in RNA proce                |  |          |
| 2572233315 | t3m_01672 | Scaffold       | t3m_contig_70_707_len_12253_read_count_885831.51                                      |  |          |
| 2572233315 | t3m_01672 | Coordinates    | 3277..4509(+)                                                                         |  |          |
| 2572233315 | t3m_01672 | DNA_length     | 1233bp                                                                                |  |          |
| 2572233315 | t3m_01672 | Protein_length | 410aa                                                                                 |  |          |
| 2572233315 | t3m_01672 | GC             |                                                                                       |  | 0.68     |



|            |           |                |                                                                          |           |
|------------|-----------|----------------|--------------------------------------------------------------------------|-----------|
| 2572233316 | t3m_01673 | COG_category   | [R] General function prediction only                                     |           |
| 2572233316 | t3m_01673 | COG1084        | Predicted GTPase                                                         | 3.00E-54  |
| 2572233316 | t3m_01673 | pfam01926      | MMR_HSR1                                                                 | 7.90E-16  |
| 2572233316 | t3m_01673 | TIGR00231      | small GTP-binding protein domain                                         | 3.90E-13  |
| 2572233316 | t3m_01673 | KO:K06943      | nucleolar GTP-binding protein                                            | 0.00E+00  |
| 2572233316 | t3m_01673 | Locus_type     | CDS                                                                      |           |
| 2572233316 | t3m_01673 | Product_name   | Predicted GTPase                                                         |           |
| 2572233316 | t3m_01673 | Scaffold       | t3m_contig_70_707_len_12253_read_count_885831.51                         |           |
| 2572233316 | t3m_01673 | Coordinates    | 4569..5669(-)                                                            |           |
| 2572233316 | t3m_01673 | DNA_length     | 1101bp                                                                   |           |
| 2572233316 | t3m_01673 | Protein_length | 366aa                                                                    |           |
| 2572233316 | t3m_01673 | GC             |                                                                          | 0.7       |
| 2572233317 | t3m_01674 | Metacyc        | GLYCLEAV-PWY: glycine cleavage                                           |           |
| 2572233317 | t3m_01674 | COG_category   | [E] Amino acid transport and metabolism                                  |           |
| 2572233317 | t3m_01674 | COG0403        | Glycine cleavage system protein P (pyridoxal-binding), N-terminal domain | 2.00E-109 |
| 2572233317 | t3m_01674 | pfam02347      | GDC-P                                                                    | 2.60E-102 |
| 2572233317 | t3m_01674 | EC:1.4.4.2     | Glycine dehydrogenase (decarboxylating).                                 |           |
| 2572233317 | t3m_01674 | KO:K00282      | glycine dehydrogenase subunit 1 [EC:1.4.4.2]                             | 0.00E+00  |
| 2572233317 | t3m_01674 | Locus_type     | CDS                                                                      |           |
| 2572233317 | t3m_01674 | Product_name   | Glycine cleavage system protein P (pyridoxal-binding), N-terminal domain |           |
| 2572233317 | t3m_01674 | Scaffold       | t3m_contig_70_707_len_12253_read_count_885831.51                         |           |
| 2572233317 | t3m_01674 | Coordinates    | 5815..7197(+)                                                            |           |
| 2572233317 | t3m_01674 | DNA_length     | 1383bp                                                                   |           |
| 2572233317 | t3m_01674 | Protein_length | 460aa                                                                    |           |
| 2572233317 | t3m_01674 | GC             |                                                                          | 0.7       |
| 2572233318 | t3m_01675 | Metacyc        | GLYCLEAV-PWY: glycine cleavage                                           |           |
| 2572233318 | t3m_01675 | COG_category   | [E] Amino acid transport and metabolism                                  |           |
| 2572233318 | t3m_01675 | COG1003        | Glycine cleavage system protein P (pyridoxal-binding), C-terminal domain | 0.00E+00  |
| 2572233318 | t3m_01675 | pfam02347      | GDC-P                                                                    | 4.00E-16  |
| 2572233318 | t3m_01675 | EC:1.4.4.2     | Glycine dehydrogenase (decarboxylating).                                 |           |
| 2572233318 | t3m_01675 | KO:K00283      | glycine dehydrogenase subunit 2 [EC:1.4.4.2]                             | 0.00E+00  |
| 2572233318 | t3m_01675 | ITERM:02613    | glycine dehydrogenase (decarboxylating) beta subunit (EC 1.4.4.2)        |           |

|            |           |                |                                                                   |          |
|------------|-----------|----------------|-------------------------------------------------------------------|----------|
| 2572233318 | t3m_01675 | Locus_type     | CDS                                                               |          |
| 2572233318 | t3m_01675 | Product_name   | glycine dehydrogenase (decarboxylating) beta subunit (EC 1.4.4.2) |          |
| 2572233318 | t3m_01675 | Scaffold       | t3m_contig_70_707_len_12253_read_count_885831.51                  |          |
| 2572233318 | t3m_01675 | Coordinates    | 7194..8660(+)                                                     |          |
| 2572233318 | t3m_01675 | DNA_length     | 1467bp                                                            |          |
| 2572233318 | t3m_01675 | Protein_length | 488aa                                                             |          |
| 2572233318 | t3m_01675 | GC             |                                                                   | 0.68     |
| 2572233319 | t3m_01676 | COG_category   | [E] Amino acid transport and metabolism                           |          |
| 2572233319 | t3m_01676 | COG0006        | Xaa-Pro aminopeptidase                                            | 5.00E-69 |
| 2572233319 | t3m_01676 | pfam01321      | Creatinase_N                                                      | 2.00E-04 |
| 2572233319 | t3m_01676 | pfam00557      | Peptidase_M24                                                     | 9.70E-59 |
| 2572233319 | t3m_01676 | EC:3.4.13.9    | Xaa-Pro dipeptidase.                                              |          |
| 2572233319 | t3m_01676 | KO:K01271      | Xaa-Pro dipeptidase [EC:3.4.13.9]                                 | 0.00E+00 |
| 2572233319 | t3m_01676 | Locus_type     | CDS                                                               |          |
| 2572233319 | t3m_01676 | Product_name   | Xaa-Pro aminopeptidase                                            |          |
| 2572233319 | t3m_01676 | Scaffold       | t3m_contig_70_707_len_12253_read_count_885831.51                  |          |
| 2572233319 | t3m_01676 | Coordinates    | 8676..9782(+)                                                     |          |
| 2572233319 | t3m_01676 | DNA_length     | 1107bp                                                            |          |
| 2572233319 | t3m_01676 | Protein_length | 368aa                                                             |          |
| 2572233319 | t3m_01676 | GC             |                                                                   | 0.68     |
| 2572233320 | t3m_01677 | KEGG_module    | M00345: Formaldehyde assimilation, ribulose monophosphate pathway |          |
| 2572233320 | t3m_01677 | KEGG_module    | M00001: Glycolysis (Embden-Meyerhof pathway), glucose => pyruvate |          |
| 2572233320 | t3m_01677 | Metacyc        | PWY-5484: glycolysis II (from fructose-6P)                        |          |
| 2572233320 | t3m_01677 | Metacyc        | GLYCOLYSIS: glycolysis I                                          |          |
| 2572233320 | t3m_01677 | Metacyc        | PWY-1861: formaldehyde assimilation II (RuMP Cycle)               |          |
| 2572233320 | t3m_01677 | Metacyc        | ANAGLYCOLYSIS-PWY: glycolysis III (glucokinase)                   |          |
| 2572233320 | t3m_01677 | Metacyc        | PWY-1042: glycolysis IV (plant cytosol)                           |          |
| 2572233320 | t3m_01677 | COG_category   | [G] Carbohydrate transport and metabolism                         |          |
| 2572233320 | t3m_01677 | COG0205        | 6-phosphofructokinase                                             | 7.00E-78 |
| 2572233320 | t3m_01677 | pfam00365      | PFK                                                               | 2.10E-73 |
| 2572233320 | t3m_01677 | EC:2.7.1.11    | 6-phosphofructokinase.                                            |          |
| 2572233320 | t3m_01677 | KO:K00850      | 6-phosphofructokinase 1 [EC:2.7.1.11]                             | 0.00E+00 |

|            |           |                |                                                                              |           |
|------------|-----------|----------------|------------------------------------------------------------------------------|-----------|
| 2572233320 | t3m_01677 | Locus_type     | CDS                                                                          |           |
| 2572233320 | t3m_01677 | Product_name   | 6-phosphofructokinase                                                        |           |
| 2572233320 | t3m_01677 | Scaffold       | t3m_contig_70_707_len_12253_read_count_885831.51                             |           |
| 2572233320 | t3m_01677 | Coordinates    | 9779..10801(+)                                                               |           |
| 2572233320 | t3m_01677 | DNA_length     | 1023bp                                                                       |           |
| 2572233320 | t3m_01677 | Protein_length | 340aa                                                                        |           |
| 2572233320 | t3m_01677 | GC             |                                                                              | 0.71      |
|            |           |                |                                                                              |           |
| 2572233321 | t3m_01678 | KEGG_module    | M00034: Methionine salvage pathway                                           |           |
| 2572233321 | t3m_01678 | Metacyc        | PWY-6755: <i>S</i>-methyl-5-thio-&alpha;-D-ribose 1-phosphate degradation I  |           |
| 2572233321 | t3m_01678 | Metacyc        | PWY-7174: <i>S</i>-methyl-5-thio-&alpha;-D-ribose 1-phosphate degradation II |           |
| 2572233321 | t3m_01678 | COG_category   | [J] Translation, ribosomal structure and biogenesis                          |           |
| 2572233321 | t3m_01678 | COG0182        | Predicted translation initiation factor 2B subunit, eIF-2B alpha/beta/del    | 6.00E-103 |
| 2572233321 | t3m_01678 | pfam01008      | IF-2B                                                                        | 9.20E-62  |
| 2572233321 | t3m_01678 | EC:5.3.1.23    | S-methyl-5-thioribose-1-phosphate isomerase.                                 |           |
| 2572233321 | t3m_01678 | TIGR00512      | S-methyl-5-thioribose-1-phosphate isomerase                                  | 2.30E-117 |
| 2572233321 | t3m_01678 | TIGR00524      | eIF-2B alpha/beta/delta-related uncharacterized proteins                     | 8.10E-98  |
| 2572233321 | t3m_01678 | KO:K08963      | methylthioribose-1-phosphate isomerase [EC:5.3.1.23]                         | 0.00E+00  |
| 2572233321 | t3m_01678 | ITERM:02585    | translation initiation factor 2B subunit I family (IF-2BI)                   |           |
| 2572233321 | t3m_01678 | Locus_type     | CDS                                                                          |           |
| 2572233321 | t3m_01678 | Product_name   | translation initiation factor 2B subunit I family (IF-2BI)                   |           |
| 2572233321 | t3m_01678 | Scaffold       | t3m_contig_70_707_len_12253_read_count_885831.51                             |           |
| 2572233321 | t3m_01678 | Coordinates    | 10811..11803(+)                                                              |           |
| 2572233321 | t3m_01678 | DNA_length     | 993bp                                                                        |           |
| 2572233321 | t3m_01678 | Protein_length | 330aa                                                                        |           |
| 2572233321 | t3m_01678 | GC             |                                                                              | 0.72      |
|            |           |                |                                                                              |           |
| 2572233322 | t3m_01679 | Locus_type     | CDS                                                                          |           |
| 2572233322 | t3m_01679 | Product_name   | hypothetical protein                                                         |           |
| 2572233322 | t3m_01679 | Scaffold       | t3m_contig_70_707_len_12253_read_count_885831.51                             |           |
| 2572233322 | t3m_01679 | Coordinates    | 11830..11982(-)                                                              |           |
| 2572233322 | t3m_01679 | DNA_length     | 153bp                                                                        |           |
| 2572233322 | t3m_01679 | Protein_length | 50aa                                                                         |           |
| 2572233322 | t3m_01679 | GC             |                                                                              | 0.65      |

|            |           |                |                                                     |                                                  |          |
|------------|-----------|----------------|-----------------------------------------------------|--------------------------------------------------|----------|
| 2572233322 | t3m_01679 | Transmembrane  |                                                     | Yes                                              |          |
| 2572233323 | t3m_01680 | pfam13522      | GATase_6                                            |                                                  | 1.10E-14 |
| 2572233323 | t3m_01680 | Locus_type     |                                                     | CDS                                              |          |
| 2572233323 | t3m_01680 | Product_name   |                                                     | Glutamine amidotransferase domain                |          |
| 2572233323 | t3m_01680 | Scaffold       |                                                     | t3m_contig_70_752_len_11779_read_count_862950.52 |          |
| 2572233323 | t3m_01680 | Coordinates    |                                                     | 2..451(-)                                        |          |
| 2572233323 | t3m_01680 | DNA_length     |                                                     | 450bp                                            |          |
| 2572233323 | t3m_01680 | Protein_length |                                                     | 150aa                                            |          |
| 2572233323 | t3m_01680 | GC             |                                                     |                                                  | 0.69     |
| 2572233324 | t3m_01681 | KEGG_module    | M00179: Ribosome, archaea                           |                                                  |          |
| 2572233324 | t3m_01681 | COG_category   | [J] Translation, ribosomal structure and biogenesis |                                                  |          |
| 2572233324 | t3m_01681 | COG2058        | Ribosomal protein L12E/L44/L45/RPP1/RPP2            |                                                  | 2.00E-07 |
| 2572233324 | t3m_01681 | pfam00428      | Ribosomal_60s                                       |                                                  | 1.10E-13 |
| 2572233324 | t3m_01681 | TIGR03685      | 50S ribosomal protein L12P                          |                                                  | 1.70E-37 |
| 2572233324 | t3m_01681 | KO:K02869      | large subunit ribosomal protein L12                 |                                                  | 6.00E-27 |
| 2572233324 | t3m_01681 | Locus_type     |                                                     | CDS                                              |          |
| 2572233324 | t3m_01681 | Product_name   |                                                     | LSU ribosomal protein L12AE                      |          |
| 2572233324 | t3m_01681 | Scaffold       |                                                     | t3m_contig_70_752_len_11779_read_count_862950.52 |          |
| 2572233324 | t3m_01681 | Coordinates    |                                                     | 537..851(-)                                      |          |
| 2572233324 | t3m_01681 | DNA_length     |                                                     | 315bp                                            |          |
| 2572233324 | t3m_01681 | Protein_length |                                                     | 104aa                                            |          |
| 2572233324 | t3m_01681 | GC             |                                                     |                                                  | 0.68     |
| 2572233325 | t3m_01682 | KEGG_module    | M00179: Ribosome, archaea                           |                                                  |          |
| 2572233325 | t3m_01682 | KEGG_module    | M00178: Ribosome, bacteria                          |                                                  |          |
| 2572233325 | t3m_01682 | COG_category   | [J] Translation, ribosomal structure and biogenesis |                                                  |          |
| 2572233325 | t3m_01682 | COG0244        | Ribosomal protein L10                               |                                                  | 2.00E-18 |
| 2572233325 | t3m_01682 | pfam00466      | Ribosomal_L10                                       |                                                  | 8.70E-12 |
| 2572233325 | t3m_01682 | KO:K02864      | large subunit ribosomal protein L10                 |                                                  | 0.00E+00 |
| 2572233325 | t3m_01682 | ITERM:00276    | LSU ribosomal protein L10P                          |                                                  |          |
| 2572233325 | t3m_01682 | Locus_type     |                                                     | CDS                                              |          |
| 2572233325 | t3m_01682 | Product_name   |                                                     | LSU ribosomal protein L10P                       |          |

|            |           |                |                                                     |          |
|------------|-----------|----------------|-----------------------------------------------------|----------|
| 2572233325 | t3m_01682 | Scaffold       | t3m_contig_70_752_len_11779_read_count_862950.52    |          |
| 2572233325 | t3m_01682 | Coordinates    | 883..1743(-)                                        |          |
| 2572233325 | t3m_01682 | DNA_length     | 861bp                                               |          |
| 2572233325 | t3m_01682 | Protein_length | 286aa                                               |          |
| 2572233325 | t3m_01682 | GC             |                                                     | 0.7      |
| 2572233326 | t3m_01683 | KEGG_module    | M00178: Ribosome, bacteria                          |          |
| 2572233326 | t3m_01683 | KEGG_module    | M00179: Ribosome, archaea                           |          |
| 2572233326 | t3m_01683 | COG_category   | [J] Translation, ribosomal structure and biogenesis |          |
| 2572233326 | t3m_01683 | COG0081        | Ribosomal protein L1                                | 4.00E-41 |
| 2572233326 | t3m_01683 | pfam00687      | Ribosomal_L1                                        | 1.20E-42 |
| 2572233326 | t3m_01683 | KO:K02863      | large subunit ribosomal protein L1                  | 0.00E+00 |
| 2572233326 | t3m_01683 | ITERM:00163    | LSU ribosomal protein L1P                           |          |
| 2572233326 | t3m_01683 | Locus_type     | CDS                                                 |          |
| 2572233326 | t3m_01683 | Product_name   | LSU ribosomal protein L1P                           |          |
| 2572233326 | t3m_01683 | Scaffold       | t3m_contig_70_752_len_11779_read_count_862950.52    |          |
| 2572233326 | t3m_01683 | Coordinates    | 1754..2383(-)                                       |          |
| 2572233326 | t3m_01683 | DNA_length     | 630bp                                               |          |
| 2572233326 | t3m_01683 | Protein_length | 209aa                                               |          |
| 2572233326 | t3m_01683 | GC             |                                                     | 0.66     |
| 2572233327 | t3m_01684 | KEGG_module    | M00177: Ribosome, eukaryotes                        |          |
| 2572233327 | t3m_01684 | KEGG_module    | M00179: Ribosome, archaea                           |          |
| 2572233327 | t3m_01684 | COG_category   | [J] Translation, ribosomal structure and biogenesis |          |
| 2572233327 | t3m_01684 | COG1631        | Ribosomal protein L44E                              | 1.00E-23 |
| 2572233327 | t3m_01684 | pfam00935      | Ribosomal_L44                                       | 8.80E-28 |
| 2572233327 | t3m_01684 | KO:K02929      | large subunit ribosomal protein L44e                | 8.30E-28 |
| 2572233327 | t3m_01684 | ITERM:00274    | LSU ribosomal protein L44E                          |          |
| 2572233327 | t3m_01684 | Locus_type     | CDS                                                 |          |
| 2572233327 | t3m_01684 | Product_name   | LSU ribosomal protein L44E                          |          |
| 2572233327 | t3m_01684 | Scaffold       | t3m_contig_70_752_len_11779_read_count_862950.52    |          |
| 2572233327 | t3m_01684 | Coordinates    | 2636..2920(+)                                       |          |
| 2572233327 | t3m_01684 | DNA_length     | 285bp                                               |          |
| 2572233327 | t3m_01684 | Protein_length | 94aa                                                |          |

|            |           |                |                                                             |          |
|------------|-----------|----------------|-------------------------------------------------------------|----------|
| 2572233327 | t3m_01684 | GC             |                                                             | 0.66     |
| 2572233328 | t3m_01685 | KEGG_module    | M00177: Ribosome, eukaryotes                                |          |
| 2572233328 | t3m_01685 | KEGG_module    | M00179: Ribosome, archaea                                   |          |
| 2572233328 | t3m_01685 | COG_category   | [J] Translation, ribosomal structure and biogenesis         |          |
| 2572233328 | t3m_01685 | COG2051        | Ribosomal protein S27E                                      | 2.00E-12 |
| 2572233328 | t3m_01685 | pfam01667      | Ribosomal_S27e                                              | 7.00E-20 |
| 2572233328 | t3m_01685 | KO:K02978      | small subunit ribosomal protein S27e                        | 1.10E-11 |
| 2572233328 | t3m_01685 | Locus_type     | CDS                                                         |          |
| 2572233328 | t3m_01685 | Product_name   | SSU ribosomal protein S27E                                  |          |
| 2572233328 | t3m_01685 | Scaffold       | t3m_contig_70_752_len_11779_read_count_862950.52            |          |
| 2572233328 | t3m_01685 | Coordinates    | 2931..3107(+)                                               |          |
| 2572233328 | t3m_01685 | DNA_length     | 177bp                                                       |          |
| 2572233328 | t3m_01685 | Protein_length | 58aa                                                        |          |
| 2572233328 | t3m_01685 | GC             |                                                             | 0.7      |
| 2572233329 | t3m_01686 | COG_category   | [J] Translation, ribosomal structure and biogenesis         |          |
| 2572233329 | t3m_01686 | COG1093        | Translation initiation factor 2, alpha subunit (eIF-2alpha) | 7.00E-74 |
| 2572233329 | t3m_01686 | pfam07541      | EIF_2_alpha                                                 | 5.40E-22 |
| 2572233329 | t3m_01686 | pfam00575      | S1                                                          | 8.90E-15 |
| 2572233329 | t3m_01686 | KO:K03237      | translation initiation factor 2 subunit 1                   | 0.00E+00 |
| 2572233329 | t3m_01686 | ITERM:01963    | translation initiation factor 2 subunit alpha (aeIF-2a)     |          |
| 2572233329 | t3m_01686 | Locus_type     | CDS                                                         |          |
| 2572233329 | t3m_01686 | Product_name   | translation initiation factor 2 subunit alpha (aeIF-2a)     |          |
| 2572233329 | t3m_01686 | Scaffold       | t3m_contig_70_752_len_11779_read_count_862950.52            |          |
| 2572233329 | t3m_01686 | Coordinates    | 3127..3903(+)                                               |          |
| 2572233329 | t3m_01686 | DNA_length     | 777bp                                                       |          |
| 2572233329 | t3m_01686 | Protein_length | 258aa                                                       |          |
| 2572233329 | t3m_01686 | GC             |                                                             | 0.66     |
| 2572233330 | t3m_01687 | KEGG_module    | M00425: H/ACA ribonucleoprotein complex                     |          |
| 2572233330 | t3m_01687 | COG_category   | [J] Translation, ribosomal structure and biogenesis         |          |
| 2572233330 | t3m_01687 | COG2260        | Predicted Zn-ribbon RNA-binding protein                     | 1.00E-09 |
| 2572233330 | t3m_01687 | pfam04135      | Nop10p                                                      | 5.30E-18 |

|            |           |                |                                                         |          |
|------------|-----------|----------------|---------------------------------------------------------|----------|
| 2572233330 | t3m_01687 | KO:K11130      | H/ACA ribonucleoprotein complex subunit 3               | 6.60E-10 |
| 2572233330 | t3m_01687 | Locus_type     | CDS                                                     |          |
| 2572233330 | t3m_01687 | Product_name   | Predicted Zn-ribbon RNA-binding protein                 |          |
| 2572233330 | t3m_01687 | Scaffold       | t3m_contig_70_752_len_11779_read_count_862950.52        |          |
| 2572233330 | t3m_01687 | Coordinates    | 3900..4085(+)                                           |          |
| 2572233330 | t3m_01687 | DNA_length     | 186bp                                                   |          |
| 2572233330 | t3m_01687 | Protein_length | 61aa                                                    |          |
| 2572233330 | t3m_01687 | GC             |                                                         | 0.69     |
| 2572233331 | t3m_01688 | COG_category   | [S] Function unknown                                    |          |
| 2572233331 | t3m_01688 | COG4860        | Uncharacterized protein conserved in archaea            | 3.00E-30 |
| 2572233331 | t3m_01688 | pfam09824      | ArsR                                                    | 7.40E-38 |
| 2572233331 | t3m_01688 | Locus_type     | CDS                                                     |          |
| 2572233331 | t3m_01688 | Product_name   | Uncharacterized protein conserved in archaea            |          |
| 2572233331 | t3m_01688 | Scaffold       | t3m_contig_70_752_len_11779_read_count_862950.52        |          |
| 2572233331 | t3m_01688 | Coordinates    | 4088..4615(+)                                           |          |
| 2572233331 | t3m_01688 | DNA_length     | 528bp                                                   |          |
| 2572233331 | t3m_01688 | Protein_length | 175aa                                                   |          |
| 2572233331 | t3m_01688 | GC             |                                                         | 0.64     |
| 2572233332 | t3m_01689 | COG_category   | [S] Function unknown                                    |          |
| 2572233332 | t3m_01689 | COG1303        | Uncharacterized protein conserved in archaea            | 6.00E-47 |
| 2572233332 | t3m_01689 | pfam01994      | Trm56                                                   | 2.20E-34 |
| 2572233332 | t3m_01689 | EC:2.1.1.206   | tRNA (cytidine(56)-2'-O)-methyltransferase.             |          |
| 2572233332 | t3m_01689 | KO:K07254      | tRNA (cytidine56-2'-O)-methyltransferase [EC:2.1.1.206] | 1.90E-42 |
| 2572233332 | t3m_01689 | Locus_type     | CDS                                                     |          |
| 2572233332 | t3m_01689 | Product_name   | Uncharacterized protein conserved in archaea            |          |
| 2572233332 | t3m_01689 | Scaffold       | t3m_contig_70_752_len_11779_read_count_862950.52        |          |
| 2572233332 | t3m_01689 | Coordinates    | 4569..5144(+)                                           |          |
| 2572233332 | t3m_01689 | DNA_length     | 576bp                                                   |          |
| 2572233332 | t3m_01689 | Protein_length | 191aa                                                   |          |
| 2572233332 | t3m_01689 | GC             |                                                         | 0.73     |
| 2572233333 | t3m_01690 | KEGG_module    | M00095: C5 isoprenoid biosynthesis, mevalonate pathway  |          |

|            |           |                |                                                                          |          |
|------------|-----------|----------------|--------------------------------------------------------------------------|----------|
| 2572233333 | t3m_01690 | Metacyc        | PWY-6174: mevalonate pathway II (archaea)                                |          |
| 2572233333 | t3m_01690 | Metacyc        | PWY-922: mevalonate pathway I                                            |          |
| 2572233333 | t3m_01690 | IMG_pathway    | 178: Mevalonate pathway for isopentenyl pyrophosphate synthesis          |          |
| 2572233333 | t3m_01690 | IMG_pathway    | 591: Archaeal mevalonate pathway for isopentenyl pyrophosphate synthesis |          |
| 2572233333 | t3m_01690 | COG_category   | [I] Lipid transport and metabolism                                       |          |
| 2572233333 | t3m_01690 | COG1577        | Mevalonate kinase                                                        | 5.00E-39 |
| 2572233333 | t3m_01690 | pfam00288      | GHMP_kinases_N                                                           | 1.60E-13 |
| 2572233333 | t3m_01690 | pfam08544      | GHMP_kinases_C                                                           | 9.60E-10 |
| 2572233333 | t3m_01690 | EC:2.7.1.36    | Mevalonate kinase.                                                       |          |
| 2572233333 | t3m_01690 | TIGR00549      | mevalonate kinase                                                        | 5.90E-52 |
| 2572233333 | t3m_01690 | KO:K00869      | mevalonate kinase [EC:2.7.1.36]                                          | 2.30E-40 |
| 2572233333 | t3m_01690 | ITERM:00464    | mevalonate kinase (EC 2.7.1.36)                                          |          |
| 2572233333 | t3m_01690 | Locus_type     | CDS                                                                      |          |
| 2572233333 | t3m_01690 | Product_name   | mevalonate kinase (EC 2.7.1.36)                                          |          |
| 2572233333 | t3m_01690 | Scaffold       | t3m_contig_70_752_len_11779_read_count_862950.52                         |          |
| 2572233333 | t3m_01690 | Coordinates    | 5141..6112(+)                                                            |          |
| 2572233333 | t3m_01690 | DNA_length     | 972bp                                                                    |          |
| 2572233333 | t3m_01690 | Protein_length | 323aa                                                                    |          |
| 2572233333 | t3m_01690 | GC             |                                                                          | 0.73     |
| 2572233334 | t3m_01691 | COG_category   | [J] Translation, ribosomal structure and biogenesis                      |          |
| 2572233334 | t3m_01691 | COG0012        | Predicted GTPase, probable translation factor                            | 1.00E-76 |
| 2572233334 | t3m_01691 | pfam01926      | MMR_HSR1                                                                 | 6.40E-18 |
| 2572233334 | t3m_01691 | pfam08438      | MMR_HSR1_C                                                               | 5.40E-29 |
| 2572233334 | t3m_01691 | Locus_type     | CDS                                                                      |          |
| 2572233334 | t3m_01691 | Product_name   | Predicted GTPase, probable translation factor                            |          |
| 2572233334 | t3m_01691 | Scaffold       | t3m_contig_70_752_len_11779_read_count_862950.52                         |          |
| 2572233334 | t3m_01691 | Coordinates    | 6136..7332(-)                                                            |          |
| 2572233334 | t3m_01691 | DNA_length     | 1197bp                                                                   |          |
| 2572233334 | t3m_01691 | Protein_length | 398aa                                                                    |          |
| 2572233334 | t3m_01691 | GC             |                                                                          | 0.69     |
| 2572233335 | t3m_01692 | COG_category   | [S] Function unknown                                                     |          |
| 2572233335 | t3m_01692 | COG2096        | Uncharacterized conserved protein                                        | 1.00E-43 |



|            |           |                |                                                  |          |
|------------|-----------|----------------|--------------------------------------------------|----------|
| 2572233335 | t3m_01692 | pfam01923      | Cob_adeno_trans                                  | 6.50E-51 |
| 2572233335 | t3m_01692 | TIGR00636      | ATP:cob(l)alamin adenosyltransferase             | 3.40E-51 |
| 2572233335 | t3m_01692 | Locus_type     | CDS                                              |          |
| 2572233335 | t3m_01692 | Product_name   | ATP:cob(l)alamin adenosyltransferase             |          |
| 2572233335 | t3m_01692 | Scaffold       | t3m_contig_70_752_len_11779_read_count_862950.52 |          |
| 2572233335 | t3m_01692 | Coordinates    | 7355..7930(-)                                    |          |
| 2572233335 | t3m_01692 | DNA_length     | 576bp                                            |          |
| 2572233335 | t3m_01692 | Protein_length | 191aa                                            |          |
| 2572233335 | t3m_01692 | GC             |                                                  | 0.7      |
|            |           |                |                                                  |          |
| 2572233336 | t3m_01693 | Locus_type     | CDS                                              |          |
| 2572233336 | t3m_01693 | Product_name   | hypothetical protein                             |          |
| 2572233336 | t3m_01693 | Scaffold       | t3m_contig_70_752_len_11779_read_count_862950.52 |          |
| 2572233336 | t3m_01693 | Coordinates    | 8098..8451(-)                                    |          |
| 2572233336 | t3m_01693 | DNA_length     | 354bp                                            |          |
| 2572233336 | t3m_01693 | Protein_length | 117aa                                            |          |
| 2572233336 | t3m_01693 | GC             |                                                  | 0.71     |
|            |           |                |                                                  |          |
| 2572233337 | t3m_01694 | Locus_type     | CDS                                              |          |
| 2572233337 | t3m_01694 | Product_name   | hypothetical protein                             |          |
| 2572233337 | t3m_01694 | Scaffold       | t3m_contig_70_752_len_11779_read_count_862950.52 |          |
| 2572233337 | t3m_01694 | Coordinates    | 8802..9128(-)                                    |          |
| 2572233337 | t3m_01694 | DNA_length     | 327bp                                            |          |
| 2572233337 | t3m_01694 | Protein_length | 108aa                                            |          |
| 2572233337 | t3m_01694 | GC             |                                                  | 0.61     |
|            |           |                |                                                  |          |
| 2572233338 | t3m_01695 | Locus_type     | CDS                                              |          |
| 2572233338 | t3m_01695 | Product_name   | hypothetical protein                             |          |
| 2572233338 | t3m_01695 | Scaffold       | t3m_contig_70_752_len_11779_read_count_862950.52 |          |
| 2572233338 | t3m_01695 | Coordinates    | 9347..9592(-)                                    |          |
| 2572233338 | t3m_01695 | DNA_length     | 246bp                                            |          |
| 2572233338 | t3m_01695 | Protein_length | 81aa                                             |          |
| 2572233338 | t3m_01695 | GC             |                                                  | 0.56     |
| 2572233338 | t3m_01695 | Transmembrane  | Yes                                              |          |

|            |           |                |                                                                      |          |
|------------|-----------|----------------|----------------------------------------------------------------------|----------|
| 2572233339 | t3m_01696 | Locus_type     | CDS                                                                  |          |
| 2572233339 | t3m_01696 | Product_name   | hypothetical protein                                                 |          |
| 2572233339 | t3m_01696 | Scaffold       | t3m_contig_70_752_len_11779_read_count_862950.52                     |          |
| 2572233339 | t3m_01696 | Coordinates    | 10191..11108(+)                                                      |          |
| 2572233339 | t3m_01696 | DNA_length     | 918bp                                                                |          |
| 2572233339 | t3m_01696 | Protein_length | 305aa                                                                |          |
| 2572233339 | t3m_01696 | GC             |                                                                      | 0.66     |
| 2572233339 | t3m_01696 | Transmembrane  | Yes                                                                  |          |
|            |           |                |                                                                      |          |
| 2572233340 | t3m_01697 | Locus_type     | CDS                                                                  |          |
| 2572233340 | t3m_01697 | Product_name   | hypothetical protein                                                 |          |
| 2572233340 | t3m_01697 | Scaffold       | t3m_contig_70_752_len_11779_read_count_862950.52                     |          |
| 2572233340 | t3m_01697 | Coordinates    | 11110..11778(+)                                                      |          |
| 2572233340 | t3m_01697 | DNA_length     | 669bp                                                                |          |
| 2572233340 | t3m_01697 | Protein_length | 223aa                                                                |          |
| 2572233340 | t3m_01697 | GC             |                                                                      | 0.68     |
| 2572233340 | t3m_01697 | Transmembrane  | Yes                                                                  |          |
|            |           |                |                                                                      |          |
| 2572233341 | t3m_01698 | KEGG_module    | M00050: Guanine ribonucleotide biosynthesis IMP => GDP,GTP           |          |
| 2572233341 | t3m_01698 | Metacyc        | PWY-6125: guanosine nucleotides <i>de novo</i> biosynthesis          |          |
| 2572233341 | t3m_01698 | Metacyc        | PWY-841: purine nucleotides <i>de novo</i> biosynthesis II           |          |
| 2572233341 | t3m_01698 | COG_category   | [F] Nucleotide transport and metabolism                              |          |
| 2572233341 | t3m_01698 | COG0518        | GMP synthase - Glutamine amidotransferase domain                     | 1.00E-39 |
| 2572233341 | t3m_01698 | pfam00117      | GATase                                                               | 1.90E-30 |
| 2572233341 | t3m_01698 | EC:6.3.5.2     | GMP synthase (glutamine-hydrolyzing).                                |          |
| 2572233341 | t3m_01698 | TIGR00888      | GMP synthase (glutamine-hydrolyzing), N-terminal domain or A subunit | 6.80E-52 |
| 2572233341 | t3m_01698 | KO:K01951      | GMP synthase (glutamine-hydrolyzing) [EC:6.3.5.2]                    | 1.40E-45 |
| 2572233341 | t3m_01698 | Locus_type     | CDS                                                                  |          |
| 2572233341 | t3m_01698 | Product_name   | GMP synthase - Glutamine amidotransferase domain                     |          |
| 2572233341 | t3m_01698 | Scaffold       | t3m_contig_70_764_len_11651_read_count_1037928.53                    |          |
| 2572233341 | t3m_01698 | Coordinates    | 3..539(+)                                                            |          |
| 2572233341 | t3m_01698 | DNA_length     | 537bp                                                                |          |
| 2572233341 | t3m_01698 | Protein_length | 178aa                                                                |          |

|            |           |                |                                                     |          |
|------------|-----------|----------------|-----------------------------------------------------|----------|
| 2572233341 | t3m_01698 | GC             |                                                     | 0.71     |
| 2572233342 | t3m_01699 | Locus_type     | CDS                                                 |          |
| 2572233342 | t3m_01699 | Product_name   | hypothetical protein                                |          |
| 2572233342 | t3m_01699 | Scaffold       | t3m_contig_70_764_len_11651_read_count_1037928.53   |          |
| 2572233342 | t3m_01699 | Coordinates    | 586..2139(+)                                        |          |
| 2572233342 | t3m_01699 | DNA_length     | 1554bp                                              |          |
| 2572233342 | t3m_01699 | Protein_length | 517aa                                               |          |
| 2572233342 | t3m_01699 | GC             |                                                     | 0.72     |
| 2572233343 | t3m_01700 | Locus_type     | CDS                                                 |          |
| 2572233343 | t3m_01700 | Product_name   | hypothetical protein                                |          |
| 2572233343 | t3m_01700 | Scaffold       | t3m_contig_70_764_len_11651_read_count_1037928.53   |          |
| 2572233343 | t3m_01700 | Coordinates    | 2266..2667(+)                                       |          |
| 2572233343 | t3m_01700 | DNA_length     | 402bp                                               |          |
| 2572233343 | t3m_01700 | Protein_length | 133aa                                               |          |
| 2572233343 | t3m_01700 | GC             |                                                     | 0.7      |
| 2572233344 | t3m_01701 | Metacyc        | PWY-6482: diphthamide biosynthesis                  |          |
| 2572233344 | t3m_01701 | COG_category   | [J] Translation, ribosomal structure and biogenesis |          |
| 2572233344 | t3m_01701 | COG1798        | Diphthamide biosynthesis methyltransferase          | 6.00E-56 |
| 2572233344 | t3m_01701 | pfam00590      | TP_methylase                                        | 5.00E-17 |
| 2572233344 | t3m_01701 | EC:2.1.1.98    | Diphthine synthase.                                 |          |
| 2572233344 | t3m_01701 | TIGR00522      | diphthine synthase                                  | 5.70E-60 |
| 2572233344 | t3m_01701 | KO:K00586      | diphthine synthase [EC:2.1.1.98]                    | 4.40E-42 |
| 2572233344 | t3m_01701 | Locus_type     | CDS                                                 |          |
| 2572233344 | t3m_01701 | Product_name   | diphthine synthase                                  |          |
| 2572233344 | t3m_01701 | Scaffold       | t3m_contig_70_764_len_11651_read_count_1037928.53   |          |
| 2572233344 | t3m_01701 | Coordinates    | 2664..3461(-)                                       |          |
| 2572233344 | t3m_01701 | DNA_length     | 798bp                                               |          |
| 2572233344 | t3m_01701 | Protein_length | 265aa                                               |          |
| 2572233344 | t3m_01701 | GC             |                                                     | 0.71     |
| 2572233345 | t3m_01702 | COG_category   | [T] Signal transduction mechanisms                  |          |

|            |           |                |                                                                       |          |
|------------|-----------|----------------|-----------------------------------------------------------------------|----------|
| 2572233345 | t3m_01702 | COG0589        | Universal stress protein UspA and related nucleotide-binding proteins | 6.00E-05 |
| 2572233345 | t3m_01702 | pfam00582      | Usp                                                                   | 2.30E-14 |
| 2572233345 | t3m_01702 | Locus_type     | CDS                                                                   |          |
| 2572233345 | t3m_01702 | Product_name   | Universal stress protein UspA and related nucleotide-binding proteins |          |
| 2572233345 | t3m_01702 | Scaffold       | t3m_contig_70_764_len_11651_read_count_1037928.53                     |          |
| 2572233345 | t3m_01702 | Coordinates    | 3476..4285(-)                                                         |          |
| 2572233345 | t3m_01702 | DNA_length     | 810bp                                                                 |          |
| 2572233345 | t3m_01702 | Protein_length | 269aa                                                                 |          |
| 2572233345 | t3m_01702 | GC             |                                                                       | 0.71     |
| 2572233346 | t3m_01703 | COG_category   | [P] Inorganic ion transport and metabolism                            |          |
| 2572233346 | t3m_01703 | COG2156        | K+-transporting ATPase, c chain                                       | 1.00E-32 |
| 2572233346 | t3m_01703 | pfam02669      | KdpC                                                                  | 8.70E-30 |
| 2572233346 | t3m_01703 | EC:3.6.3.12    | Potassium-transporting ATPase.                                        |          |
| 2572233346 | t3m_01703 | TIGR00681      | K+-transporting ATPase, C subunit                                     | 8.00E-34 |
| 2572233346 | t3m_01703 | KO:K01548      | K+-transporting ATPase ATPase C chain [EC:3.6.3.12]                   | 3.30E-26 |
| 2572233346 | t3m_01703 | Locus_type     | CDS                                                                   |          |
| 2572233346 | t3m_01703 | Product_name   | K+-transporting ATPase, c chain                                       |          |
| 2572233346 | t3m_01703 | Scaffold       | t3m_contig_70_764_len_11651_read_count_1037928.53                     |          |
| 2572233346 | t3m_01703 | Coordinates    | 4288..4968(-)                                                         |          |
| 2572233346 | t3m_01703 | DNA_length     | 681bp                                                                 |          |
| 2572233346 | t3m_01703 | Protein_length | 226aa                                                                 |          |
| 2572233346 | t3m_01703 | GC             |                                                                       | 0.64     |
| 2572233346 | t3m_01703 | Transmembrane  | Yes                                                                   |          |
| 2572233347 | t3m_01704 | COG_category   | [P] Inorganic ion transport and metabolism                            |          |
| 2572233347 | t3m_01704 | COG2216        | High-affinity K+ transport system, ATPase chain B                     | 0.00E+00 |
| 2572233347 | t3m_01704 | pfam00122      | E1-E2_ATPase                                                          | 1.00E-33 |
| 2572233347 | t3m_01704 | pfam00702      | Hydrolase                                                             | 1.30E-34 |
| 2572233347 | t3m_01704 | EC:3.6.3.12    | Potassium-transporting ATPase.                                        |          |
| 2572233347 | t3m_01704 | TIGR01497      | K+-transporting ATPase, B subunit                                     | 0.00E+00 |
| 2572233347 | t3m_01704 | TIGR01494      | ATPase, P-type (transporting), HAD superfamily, subfamily IC          | 3.30E-34 |
| 2572233347 | t3m_01704 | KO:K01547      | K+-transporting ATPase ATPase B chain [EC:3.6.3.12]                   | 0.00E+00 |
| 2572233347 | t3m_01704 | Locus_type     | CDS                                                                   |          |

|            |           |                |                                                     |           |
|------------|-----------|----------------|-----------------------------------------------------|-----------|
| 2572233347 | t3m_01704 | Product_name   | K+-transporting ATPase, B subunit                   |           |
| 2572233347 | t3m_01704 | Scaffold       | t3m_contig_70_764_len_11651_read_count_1037928.53   |           |
| 2572233347 | t3m_01704 | Coordinates    | 4965..7100(-)                                       |           |
| 2572233347 | t3m_01704 | DNA_length     | 2136bp                                              |           |
| 2572233347 | t3m_01704 | Protein_length | 711aa                                               |           |
| 2572233347 | t3m_01704 | GC             |                                                     | 0.66      |
| 2572233347 | t3m_01704 | Transmembrane  | Yes                                                 |           |
| 2572233348 | t3m_01705 | COG_category   | [P] Inorganic ion transport and metabolism          |           |
| 2572233348 | t3m_01705 | COG2060        | K+-transporting ATPase, A chain                     | 3.00E-127 |
| 2572233348 | t3m_01705 | pfam03814      | KdpA                                                | 0.00E+00  |
| 2572233348 | t3m_01705 | EC:3.6.3.12    | Potassium-transporting ATPase.                      |           |
| 2572233348 | t3m_01705 | TIGR00680      | K+-transporting ATPase, KdpA                        | 1.20E-130 |
| 2572233348 | t3m_01705 | KO:K01546      | K+-transporting ATPase ATPase A chain [EC:3.6.3.12] | 0.00E+00  |
| 2572233348 | t3m_01705 | Locus_type     | CDS                                                 |           |
| 2572233348 | t3m_01705 | Product_name   | K+-transporting ATPase, KdpA                        |           |
| 2572233348 | t3m_01705 | Scaffold       | t3m_contig_70_764_len_11651_read_count_1037928.53   |           |
| 2572233348 | t3m_01705 | Coordinates    | 7102..8814(-)                                       |           |
| 2572233348 | t3m_01705 | DNA_length     | 1713bp                                              |           |
| 2572233348 | t3m_01705 | Protein_length | 570aa                                               |           |
| 2572233348 | t3m_01705 | GC             |                                                     | 0.64      |
| 2572233348 | t3m_01705 | Transmembrane  | Yes                                                 |           |
| 2572233349 | t3m_01706 | COG_category   | [L] Replication, recombination and repair           |           |
| 2572233349 | t3m_01706 | COG1111        | ERCC4-like helicases                                | 5.00E-121 |
| 2572233349 | t3m_01706 | pfam00271      | Helicase_C                                          | 5.90E-19  |
| 2572233349 | t3m_01706 | pfam00270      | DEAD                                                | 3.00E-20  |
| 2572233349 | t3m_01706 | Locus_type     | CDS                                                 |           |
| 2572233349 | t3m_01706 | Product_name   | ERCC4-like helicases                                |           |
| 2572233349 | t3m_01706 | Scaffold       | t3m_contig_70_764_len_11651_read_count_1037928.53   |           |
| 2572233349 | t3m_01706 | Coordinates    | 9024..10694(-)                                      |           |
| 2572233349 | t3m_01706 | DNA_length     | 1671bp                                              |           |
| 2572233349 | t3m_01706 | Protein_length | 556aa                                               |           |
| 2572233349 | t3m_01706 | GC             |                                                     | 0.69      |

|            |           |                |                                                   |          |
|------------|-----------|----------------|---------------------------------------------------|----------|
| 2572233350 | t3m_01707 | Locus_type     | CDS                                               |          |
| 2572233350 | t3m_01707 | Product_name   | hypothetical protein                              |          |
| 2572233350 | t3m_01707 | Scaffold       | t3m_contig_70_764_len_11651_read_count_1037928.53 |          |
| 2572233350 | t3m_01707 | Coordinates    | 10810..11649(-)                                   |          |
| 2572233350 | t3m_01707 | DNA_length     | 840bp                                             |          |
| 2572233350 | t3m_01707 | Protein_length | 279aa                                             |          |
| 2572233350 | t3m_01707 | GC             |                                                   | 0.66     |
|            |           |                |                                                   |          |
| 2572233351 | t3m_01708 | COG_category   | [L] Replication, recombination and repair         |          |
| 2572233351 | t3m_01708 | COG0675        | Transposase and inactivated derivatives           | 6.00E-20 |
| 2572233351 | t3m_01708 | pfam01385      | OrfB_IS605                                        | 3.80E-12 |
| 2572233351 | t3m_01708 | pfam07282      | OrfB_Zn_ribbon                                    | 1.40E-20 |
| 2572233351 | t3m_01708 | TIGR01766      | transposase, IS605 OrfB family, central region    | 1.50E-18 |
| 2572233351 | t3m_01708 | TIGR01765      | transposase, putative, N-terminal domain          | 1.60E-09 |
| 2572233351 | t3m_01708 | Locus_type     | CDS                                               |          |
| 2572233351 | t3m_01708 | Product_name   | transposase, IS605 OrfB family, central region    |          |
| 2572233351 | t3m_01708 | Scaffold       | t3m_contig_70_813_len_11090_read_count_917376.54  |          |
| 2572233351 | t3m_01708 | Coordinates    | 1..1146(-)                                        |          |
| 2572233351 | t3m_01708 | DNA_length     | 1146bp                                            |          |
| 2572233351 | t3m_01708 | Protein_length | 381aa                                             |          |
| 2572233351 | t3m_01708 | GC             |                                                   | 0.66     |
|            |           |                |                                                   |          |
| 2572233352 | t3m_01709 | COG_category   | [L] Replication, recombination and repair         |          |
| 2572233352 | t3m_01709 | COG1943        | Transposase and inactivated derivatives           | 2.00E-26 |
| 2572233352 | t3m_01709 | pfam01797      | Y1_Tnp                                            | 1.80E-34 |
| 2572233352 | t3m_01709 | KO:K07491      | putative transposase                              | 2.20E-32 |
| 2572233352 | t3m_01709 | Locus_type     | CDS                                               |          |
| 2572233352 | t3m_01709 | Product_name   | Transposase and inactivated derivatives           |          |
| 2572233352 | t3m_01709 | Scaffold       | t3m_contig_70_813_len_11090_read_count_917376.54  |          |
| 2572233352 | t3m_01709 | Coordinates    | 1185..1619(+)                                     |          |
| 2572233352 | t3m_01709 | DNA_length     | 435bp                                             |          |
| 2572233352 | t3m_01709 | Protein_length | 144aa                                             |          |
| 2572233352 | t3m_01709 | GC             |                                                   | 0.63     |

|            |           |                |                                                     |          |
|------------|-----------|----------------|-----------------------------------------------------|----------|
| 2572233353 | t3m_01710 | pfam08706      | D5_N                                                | 4.40E-07 |
| 2572233353 | t3m_01710 | TIGR01613      | phage/plasmid primase, P4 family, C-terminal domain | 1.40E-53 |
| 2572233353 | t3m_01710 | Locus_type     | CDS                                                 |          |
| 2572233353 | t3m_01710 | Product_name   | phage/plasmid primase, P4 family, C-terminal domain |          |
| 2572233353 | t3m_01710 | Scaffold       | t3m_contig_70_813_len_11090_read_count_917376.54    |          |
| 2572233353 | t3m_01710 | Coordinates    | 2303..5155(+)                                       |          |
| 2572233353 | t3m_01710 | DNA_length     | 2853bp                                              |          |
| 2572233353 | t3m_01710 | Protein_length | 950aa                                               |          |
| 2572233353 | t3m_01710 | GC             |                                                     | 0.66     |
|            |           |                |                                                     |          |
| 2572233354 | t3m_01711 | Locus_type     | CDS                                                 |          |
| 2572233354 | t3m_01711 | Product_name   | hypothetical protein                                |          |
| 2572233354 | t3m_01711 | Scaffold       | t3m_contig_70_813_len_11090_read_count_917376.54    |          |
| 2572233354 | t3m_01711 | Coordinates    | 5281..5481(+)                                       |          |
| 2572233354 | t3m_01711 | DNA_length     | 201bp                                               |          |
| 2572233354 | t3m_01711 | Protein_length | 66aa                                                |          |
| 2572233354 | t3m_01711 | GC             |                                                     | 0.75     |
|            |           |                |                                                     |          |
| 2572233355 | t3m_01712 | Locus_type     | CDS                                                 |          |
| 2572233355 | t3m_01712 | Product_name   | hypothetical protein                                |          |
| 2572233355 | t3m_01712 | Scaffold       | t3m_contig_70_813_len_11090_read_count_917376.54    |          |
| 2572233355 | t3m_01712 | Coordinates    | 5478..6095(+)                                       |          |
| 2572233355 | t3m_01712 | DNA_length     | 618bp                                               |          |
| 2572233355 | t3m_01712 | Protein_length | 205aa                                               |          |
| 2572233355 | t3m_01712 | GC             |                                                     | 0.69     |
|            |           |                |                                                     |          |
| 2572233356 | t3m_01713 | Locus_type     | CDS                                                 |          |
| 2572233356 | t3m_01713 | Product_name   | hypothetical protein                                |          |
| 2572233356 | t3m_01713 | Scaffold       | t3m_contig_70_813_len_11090_read_count_917376.54    |          |
| 2572233356 | t3m_01713 | Coordinates    | 6092..7102(+)                                       |          |
| 2572233356 | t3m_01713 | DNA_length     | 1011bp                                              |          |
| 2572233356 | t3m_01713 | Protein_length | 336aa                                               |          |
| 2572233356 | t3m_01713 | GC             |                                                     | 0.6      |

|            |           |                |                                                  |      |
|------------|-----------|----------------|--------------------------------------------------|------|
| 2572233357 | t3m_01714 | Locus_type     | CDS                                              |      |
| 2572233357 | t3m_01714 | Product_name   | hypothetical protein                             |      |
| 2572233357 | t3m_01714 | Scaffold       | t3m_contig_70_813_len_11090_read_count_917376.54 |      |
| 2572233357 | t3m_01714 | Coordinates    | 7833..9401(+)                                    |      |
| 2572233357 | t3m_01714 | DNA_length     | 1569bp                                           |      |
| 2572233357 | t3m_01714 | Protein_length | 522aa                                            |      |
| 2572233357 | t3m_01714 | GC             |                                                  | 0.63 |
| 2572233357 | t3m_01714 | Signal_peptide | Yes                                              |      |
| 2572233357 | t3m_01714 | Transmembrane  | Yes                                              |      |
|            |           |                |                                                  |      |
| 2572233358 | t3m_01715 | Locus_type     | CDS                                              |      |
| 2572233358 | t3m_01715 | Product_name   | hypothetical protein                             |      |
| 2572233358 | t3m_01715 | Scaffold       | t3m_contig_70_813_len_11090_read_count_917376.54 |      |
| 2572233358 | t3m_01715 | Coordinates    | 9850..10086(+)                                   |      |
| 2572233358 | t3m_01715 | DNA_length     | 237bp                                            |      |
| 2572233358 | t3m_01715 | Protein_length | 78aa                                             |      |
| 2572233358 | t3m_01715 | GC             |                                                  | 0.62 |
|            |           |                |                                                  |      |
| 2572233359 | t3m_01716 | Locus_type     | CDS                                              |      |
| 2572233359 | t3m_01716 | Product_name   | hypothetical protein                             |      |
| 2572233359 | t3m_01716 | Scaffold       | t3m_contig_70_813_len_11090_read_count_917376.54 |      |
| 2572233359 | t3m_01716 | Coordinates    | 10264..10476(+)                                  |      |
| 2572233359 | t3m_01716 | DNA_length     | 213bp                                            |      |
| 2572233359 | t3m_01716 | Protein_length | 70aa                                             |      |
| 2572233359 | t3m_01716 | GC             |                                                  | 0.65 |
|            |           |                |                                                  |      |
| 2572233360 | t3m_01717 | Locus_type     | CDS                                              |      |
| 2572233360 | t3m_01717 | Product_name   | hypothetical protein                             |      |
| 2572233360 | t3m_01717 | Scaffold       | t3m_contig_70_813_len_11090_read_count_917376.54 |      |
| 2572233360 | t3m_01717 | Coordinates    | 10473..10808(+)                                  |      |
| 2572233360 | t3m_01717 | DNA_length     | 336bp                                            |      |
| 2572233360 | t3m_01717 | Protein_length | 111aa                                            |      |
| 2572233360 | t3m_01717 | GC             |                                                  | 0.72 |



|            |           |                |                                                  |          |
|------------|-----------|----------------|--------------------------------------------------|----------|
| 2572233361 | t3m_01718 | Locus_type     | CDS                                              |          |
| 2572233361 | t3m_01718 | Product_name   | hypothetical protein                             |          |
| 2572233361 | t3m_01718 | Scaffold       | t3m_contig_70_813_len_11090_read_count_917376.54 |          |
| 2572233361 | t3m_01718 | Coordinates    | 10805..11089(+)                                  |          |
| 2572233361 | t3m_01718 | DNA_length     | 285bp                                            |          |
| 2572233361 | t3m_01718 | Protein_length | 95aa                                             |          |
| 2572233361 | t3m_01718 | GC             |                                                  | 0.68     |
| 2572233361 | t3m_01718 | Transmembrane  | Yes                                              |          |
| 2572233362 | t3m_01719 | pfam01849      | NAC                                              | 7.70E-17 |
| 2572233362 | t3m_01719 | TIGR00264      | alpha-NAC-related protein                        | 1.50E-22 |
| 2572233362 | t3m_01719 | Locus_type     | CDS                                              |          |
| 2572233362 | t3m_01719 | Product_name   | NAC domain                                       |          |
| 2572233362 | t3m_01719 | Scaffold       | t3m_contig_70_820_len_11056_read_count_891743.55 |          |
| 2572233362 | t3m_01719 | Coordinates    | 1..204(-)                                        |          |
| 2572233362 | t3m_01719 | DNA_length     | 204bp                                            |          |
| 2572233362 | t3m_01719 | Protein_length | 68aa                                             |          |
| 2572233362 | t3m_01719 | GC             |                                                  | 0.67     |
| 2572233363 | t3m_01720 | COG_category   | [R] General function prediction only             |          |
| 2572233363 | t3m_01720 | COG0517        | FOG: CBS domain                                  | 4.00E-08 |
| 2572233363 | t3m_01720 | pfam00571      | CBS                                              | 8.70E-10 |
| 2572233363 | t3m_01720 | pfam00571      | CBS                                              | 9.70E-10 |
| 2572233363 | t3m_01720 | pfam00571      | CBS                                              | 1.40E-08 |
| 2572233363 | t3m_01720 | Locus_type     | CDS                                              |          |
| 2572233363 | t3m_01720 | Product_name   | FOG: CBS domain                                  |          |
| 2572233363 | t3m_01720 | Scaffold       | t3m_contig_70_820_len_11056_read_count_891743.55 |          |
| 2572233363 | t3m_01720 | Coordinates    | 218..1438(-)                                     |          |
| 2572233363 | t3m_01720 | DNA_length     | 1221bp                                           |          |
| 2572233363 | t3m_01720 | Protein_length | 406aa                                            |          |
| 2572233363 | t3m_01720 | GC             |                                                  | 0.7      |
| 2572233364 | t3m_01721 | COG_category   | [R] General function prediction only             |          |

|            |           |                |                                                                       |          |
|------------|-----------|----------------|-----------------------------------------------------------------------|----------|
| 2572233364 | t3m_01721 | COG0456        | Acetyltransferases                                                    | 3.00E-16 |
| 2572233364 | t3m_01721 | pfam00583      | Acetyltransf_1                                                        | 1.50E-14 |
| 2572233364 | t3m_01721 | EC:2.3.1.128   | Ribosomal-protein-alanine N-acetyltransferase.                        |          |
| 2572233364 | t3m_01721 | KO:K03789      | ribosomal-protein-alanine N-acetyltransferase [EC:2.3.1.128]          | 3.30E-24 |
| 2572233364 | t3m_01721 | ITERM:02526    | [SSU ribosomal protein S18P]-alanine acetyltransferase (EC 2.3.1.128) |          |
| 2572233364 | t3m_01721 | Locus_type     | CDS                                                                   |          |
| 2572233364 | t3m_01721 | Product_name   | [SSU ribosomal protein S18P]-alanine acetyltransferase (EC 2.3.1.128) |          |
| 2572233364 | t3m_01721 | Scaffold       | t3m_contig_70_820_len_11056_read_count_891743.55                      |          |
| 2572233364 | t3m_01721 | Coordinates    | 1528..2010(-)                                                         |          |
| 2572233364 | t3m_01721 | DNA_length     | 483bp                                                                 |          |
| 2572233364 | t3m_01721 | Protein_length | 160aa                                                                 |          |
| 2572233364 | t3m_01721 | GC             |                                                                       | 0.68     |
| 2572233365 | t3m_01722 | COG_category   | [R] General function prediction only                                  |          |
| 2572233365 | t3m_01722 | COG1938        | Archaeal enzymes of ATP-grasp superfamily                             | 8.00E-35 |
| 2572233365 | t3m_01722 | pfam09754      | PAC2                                                                  | 1.60E-32 |
| 2572233365 | t3m_01722 | KO:K06869      | uncharacterized protein                                               | 1.90E-34 |
| 2572233365 | t3m_01722 | Locus_type     | CDS                                                                   |          |
| 2572233365 | t3m_01722 | Product_name   | Archaeal enzymes of ATP-grasp superfamily                             |          |
| 2572233365 | t3m_01722 | Scaffold       | t3m_contig_70_820_len_11056_read_count_891743.55                      |          |
| 2572233365 | t3m_01722 | Coordinates    | 2018..2794(-)                                                         |          |
| 2572233365 | t3m_01722 | DNA_length     | 777bp                                                                 |          |
| 2572233365 | t3m_01722 | Protein_length | 258aa                                                                 |          |
| 2572233365 | t3m_01722 | GC             |                                                                       | 0.67     |
| 2572233366 | t3m_01723 | COG_category   | [M] Cell wall/membrane/envelope biogenesis                            |          |
| 2572233366 | t3m_01723 | COG_category   | [G] Carbohydrate transport and metabolism                             |          |
| 2572233366 | t3m_01723 | COG0451        | Nucleoside-diphosphate-sugar epimerases                               | 4.00E-31 |
| 2572233366 | t3m_01723 | pfam01370      | Epimerase                                                             | 6.00E-22 |
| 2572233366 | t3m_01723 | ITERM:00477    | UDP-sulfoquinovose synthase (EC 3.13.1.1)                             |          |
| 2572233366 | t3m_01723 | Locus_type     | CDS                                                                   |          |
| 2572233366 | t3m_01723 | Product_name   | UDP-sulfoquinovose synthase (EC 3.13.1.1)                             |          |
| 2572233366 | t3m_01723 | Scaffold       | t3m_contig_70_820_len_11056_read_count_891743.55                      |          |
| 2572233366 | t3m_01723 | Coordinates    | 2922..4172(+)                                                         |          |

|            |           |                |                                                                        |          |
|------------|-----------|----------------|------------------------------------------------------------------------|----------|
| 2572233366 | t3m_01723 | DNA_length     | 1251bp                                                                 |          |
| 2572233366 | t3m_01723 | Protein_length | 416aa                                                                  |          |
| 2572233366 | t3m_01723 | GC             |                                                                        | 0.67     |
| 2572233367 | t3m_01724 | KEGG_module    | M00549: Nucleotide sugar biosynthesis, glucose => UDP-glucose          |          |
| 2572233367 | t3m_01724 | KEGG_module    | M00362: Nucleotide sugar biosynthesis, prokaryotes                     |          |
| 2572233367 | t3m_01724 | KEGG_module    | M00361: Nucleotide sugar biosynthesis, eukaryotes                      |          |
| 2572233367 | t3m_01724 | KEGG_module    | M00129: Ascorbate biosynthesis, animals, glucose-1P => ascorbate       |          |
| 2572233367 | t3m_01724 | Metacyc        | SUCSYN-PWY: sucrose biosynthesis                                       |          |
| 2572233367 | t3m_01724 | Metacyc        | PWY3DJ-35471: L-ascorbate biosynthesis IV                              |          |
| 2572233367 | t3m_01724 | Metacyc        | COLANSYN-PWY: colanic acid building blocks biosynthesis                |          |
| 2572233367 | t3m_01724 | Metacyc        | PWY-3801: sucrose degradation VI (anaerobic)                           |          |
| 2572233367 | t3m_01724 | Metacyc        | PWY-6527: stachyose degradation                                        |          |
| 2572233367 | t3m_01724 | Metacyc        | PWY-3821: galactose degradation III                                    |          |
| 2572233367 | t3m_01724 | Metacyc        | PWY-6981: chitin biosynthesis                                          |          |
| 2572233367 | t3m_01724 | Metacyc        | PWY-621: sucrose degradation III                                       |          |
| 2572233367 | t3m_01724 | Metacyc        | PWY-5067: glycogen biosynthesis II (from UDP-D-Glucose)                |          |
| 2572233367 | t3m_01724 | COG_category   | [M] Cell wall/membrane/envelope biogenesis                             |          |
| 2572233367 | t3m_01724 | COG1209        | dTDP-glucose pyrophosphorylase                                         | 8.00E-39 |
| 2572233367 | t3m_01724 | pfam00483      | NTP_transferase                                                        | 3.10E-19 |
| 2572233367 | t3m_01724 | EC:2.7.7.9     | UTP--glucose-1-phosphate uridylyltransferase.                          |          |
| 2572233367 | t3m_01724 | KO:K00963      | UTP--glucose-1-phosphate uridylyltransferase [EC:2.7.7.9]              | 1.70E-42 |
| 2572233367 | t3m_01724 | Locus_type     | CDS                                                                    |          |
| 2572233367 | t3m_01724 | Product_name   | dTDP-glucose pyrophosphorylase                                         |          |
| 2572233367 | t3m_01724 | Scaffold       | t3m_contig_70_820_len_11056_read_count_891743.55                       |          |
| 2572233367 | t3m_01724 | Coordinates    | 4181..5059(+)                                                          |          |
| 2572233367 | t3m_01724 | DNA_length     | 879bp                                                                  |          |
| 2572233367 | t3m_01724 | Protein_length | 292aa                                                                  |          |
| 2572233367 | t3m_01724 | GC             |                                                                        | 0.69     |
| 2572233368 | t3m_01725 | KEGG_module    | M00016: Lysine biosynthesis, succinyl-DAP pathway, aspartate => lysine |          |
| 2572233368 | t3m_01725 | Metacyc        | DAPLYSINESYN-PWY: lysine biosynthesis I                                |          |
| 2572233368 | t3m_01725 | COG_category   | [E] Amino acid transport and metabolism                                |          |
| 2572233368 | t3m_01725 | COG0624        | Acetylornithine deacetylase/Succinyl-diaminopimelate desuccinylase ar  | 1.00E-51 |

|            |           |                |                                                                        |          |
|------------|-----------|----------------|------------------------------------------------------------------------|----------|
| 2572233368 | t3m_01725 | pfam01546      | Peptidase_M20                                                          | 5.60E-29 |
| 2572233368 | t3m_01725 | pfam07687      | M20_dimer                                                              | 2.30E-25 |
| 2572233368 | t3m_01725 | EC:3.5.1.18    | Succinyl-diaminopimelate desuccinylase.                                |          |
| 2572233368 | t3m_01725 | KO:K01439      | succinyl-diaminopimelate desuccinylase [EC:3.5.1.18]                   | 6.40E-40 |
| 2572233368 | t3m_01725 | Locus_type     | CDS                                                                    |          |
| 2572233368 | t3m_01725 | Product_name   | Acetylornithine deacetylase/Succinyl-diaminopimelate desuccinylase and |          |
| 2572233368 | t3m_01725 | Scaffold       | t3m_contig_70_820_len_11056_read_count_891743.55                       |          |
| 2572233368 | t3m_01725 | Coordinates    | 5143..6222(+)                                                          |          |
| 2572233368 | t3m_01725 | DNA_length     | 1080bp                                                                 |          |
| 2572233368 | t3m_01725 | Protein_length | 359aa                                                                  |          |
| 2572233368 | t3m_01725 | GC             |                                                                        | 0.68     |
| 2572233369 | t3m_01726 | Metacyc        | PWY1G-0: mycothiol biosynthesis                                        |          |
| 2572233369 | t3m_01726 | COG_category   | [M] Cell wall/membrane/envelope biogenesis                             |          |
| 2572233369 | t3m_01726 | COG0438        | Glycosyltransferase                                                    | 3.00E-45 |
| 2572233369 | t3m_01726 | pfam00534      | Glycos_transf_1                                                        | 7.20E-43 |
| 2572233369 | t3m_01726 | pfam13579      | Glyco_trans_4_4                                                        | 4.20E-24 |
| 2572233369 | t3m_01726 | EC:2.4.1.250   | D-inositol-3-phosphate glycosyltransferase.                            |          |
| 2572233369 | t3m_01726 | KO:K15521      | D-inositol-3-phosphate glycosyltransferase [EC:2.4.1.250]              | 1.30E-41 |
| 2572233369 | t3m_01726 | Locus_type     | CDS                                                                    |          |
| 2572233369 | t3m_01726 | Product_name   | Glycosyltransferase                                                    |          |
| 2572233369 | t3m_01726 | Scaffold       | t3m_contig_70_820_len_11056_read_count_891743.55                       |          |
| 2572233369 | t3m_01726 | Coordinates    | 6287..7471(+)                                                          |          |
| 2572233369 | t3m_01726 | DNA_length     | 1185bp                                                                 |          |
| 2572233369 | t3m_01726 | Protein_length | 394aa                                                                  |          |
| 2572233369 | t3m_01726 | GC             |                                                                        | 0.72     |
| 2572233370 | t3m_01727 | COG_category   | [M] Cell wall/membrane/envelope biogenesis                             |          |
| 2572233370 | t3m_01727 | COG0438        | Glycosyltransferase                                                    | 1.00E-37 |
| 2572233370 | t3m_01727 | pfam13579      | Glyco_trans_4_4                                                        | 2.20E-20 |
| 2572233370 | t3m_01727 | pfam00534      | Glycos_transf_1                                                        | 2.90E-32 |
| 2572233370 | t3m_01727 | Locus_type     | CDS                                                                    |          |
| 2572233370 | t3m_01727 | Product_name   | Glycosyltransferase                                                    |          |
| 2572233370 | t3m_01727 | Scaffold       | t3m_contig_70_820_len_11056_read_count_891743.55                       |          |

|            |           |                |                                                                    |          |
|------------|-----------|----------------|--------------------------------------------------------------------|----------|
| 2572233370 | t3m_01727 | Coordinates    | 7468..8625(+)                                                      |          |
| 2572233370 | t3m_01727 | DNA_length     | 1158bp                                                             |          |
| 2572233370 | t3m_01727 | Protein_length | 385aa                                                              |          |
| 2572233370 | t3m_01727 | GC             |                                                                    | 0.73     |
| 2572233371 | t3m_01728 | Metacyc        | ASPARTATE-DEG1-PWY: aspartate degradation I                        |          |
| 2572233371 | t3m_01728 | Metacyc        | PWY-6643: coenzyme M biosynthesis II                               |          |
| 2572233371 | t3m_01728 | Metacyc        | PWY-7117: C4 photosynthetic carbon assimilation cycle, PEPCK type  |          |
| 2572233371 | t3m_01728 | Metacyc        | ASPARTATESYN-PWY: aspartate biosynthesis                           |          |
| 2572233371 | t3m_01728 | Metacyc        | PWY-5913: TCA cycle VI (obligate autotrophs)                       |          |
| 2572233371 | t3m_01728 | Metacyc        | PWY-6638: sulfolactate degradation III                             |          |
| 2572233371 | t3m_01728 | Metacyc        | PWY-6642: (<i>R</i>)-cysteate degradation                          |          |
| 2572233371 | t3m_01728 | Metacyc        | GLUTDEG-PWY: glutamate degradation II                              |          |
| 2572233371 | t3m_01728 | Metacyc        | MALATE-ASPARTATE-SHUTTLE-PWY: aspartate degradation II             |          |
| 2572233371 | t3m_01728 | Metacyc        | PWY-7115: C4 photosynthetic carbon assimilation cycle, NAD-ME type |          |
| 2572233371 | t3m_01728 | Metacyc        | PWY-6318: phenylalanine degradation IV (mammalian, via side chain) |          |
| 2572233371 | t3m_01728 | COG_category   | [E] Amino acid transport and metabolism                            |          |
| 2572233371 | t3m_01728 | COG0436        | Aspartate/tyrosine/aromatic aminotransferase                       | 6.00E-92 |
| 2572233371 | t3m_01728 | pfam00155      | Aminotran_1_2                                                      | 2.20E-65 |
| 2572233371 | t3m_01728 | EC:2.6.1.1     | Aspartate transaminase.                                            |          |
| 2572233371 | t3m_01728 | KO:K00812      | aspartate aminotransferase [EC:2.6.1.1]                            | 0.00E+00 |
| 2572233371 | t3m_01728 | Locus_type     | CDS                                                                |          |
| 2572233371 | t3m_01728 | Product_name   | Aspartate/tyrosine/aromatic aminotransferase                       |          |
| 2572233371 | t3m_01728 | Scaffold       | t3m_contig_70_820_len_11056_read_count_891743.55                   |          |
| 2572233371 | t3m_01728 | Coordinates    | 8741..9871(-)                                                      |          |
| 2572233371 | t3m_01728 | DNA_length     | 1131bp                                                             |          |
| 2572233371 | t3m_01728 | Protein_length | 376aa                                                              |          |
| 2572233371 | t3m_01728 | GC             |                                                                    | 0.68     |
| 2572233372 | t3m_01729 | KEGG_module    | M00049: Adenine ribonucleotide biosynthesis, IMP => ADP,ATP        |          |
| 2572233372 | t3m_01729 | Metacyc        | PWY-841: purine nucleotides <i>de novo</i> biosynthesis II         |          |
| 2572233372 | t3m_01729 | Metacyc        | PWY-6126: adenosine nucleotides <i>de novo</i> biosynthesis        |          |
| 2572233372 | t3m_01729 | IMG_pathway    | 236: AMP anabolism via adenylosuccinate                            |          |
| 2572233372 | t3m_01729 | COG_category   | [F] Nucleotide transport and metabolism                            |          |

|            |           |                |                                                  |           |
|------------|-----------|----------------|--------------------------------------------------|-----------|
| 2572233372 | t3m_01729 | COG0104        | Adenylosuccinate synthase                        | 1.00E-113 |
| 2572233372 | t3m_01729 | pfam00709      | Adenylsucc_synt                                  | 5.90E-117 |
| 2572233372 | t3m_01729 | EC:6.3.4.4     | Adenylosuccinate synthase.                       |           |
| 2572233372 | t3m_01729 | TIGR00184      | adenylosuccinate synthase                        | 1.70E-108 |
| 2572233372 | t3m_01729 | KO:K01939      | adenylosuccinate synthase [EC:6.3.4.4]           | 0.00E+00  |
| 2572233372 | t3m_01729 | ITERM:00630    | Adenylosuccinate synthetase (EC 6.3.4.4)         |           |
| 2572233372 | t3m_01729 | Locus_type     | CDS                                              |           |
| 2572233372 | t3m_01729 | Product_name   | Adenylosuccinate synthetase (EC 6.3.4.4)         |           |
| 2572233372 | t3m_01729 | Scaffold       | t3m_contig_70_820_len_11056_read_count_891743.55 |           |
| 2572233372 | t3m_01729 | Coordinates    | 10025..11053(+)                                  |           |
| 2572233372 | t3m_01729 | DNA_length     | 1029bp                                           |           |
| 2572233372 | t3m_01729 | Protein_length | 343aa                                            |           |
| 2572233372 | t3m_01729 | GC             |                                                  | 0.7       |
|            |           |                |                                                  |           |
| 2572233373 | t3m_01730 | Locus_type     | CDS                                              |           |
| 2572233373 | t3m_01730 | Product_name   | hypothetical protein                             |           |
| 2572233373 | t3m_01730 | Scaffold       | t3m_contig_70_870_len_10624_read_count_814288.56 |           |
| 2572233373 | t3m_01730 | Coordinates    | 3..602(-)                                        |           |
| 2572233373 | t3m_01730 | DNA_length     | 600bp                                            |           |
| 2572233373 | t3m_01730 | Protein_length | 200aa                                            |           |
| 2572233373 | t3m_01730 | GC             |                                                  | 0.67      |
|            |           |                |                                                  |           |
| 2572233374 | t3m_01731 | COG_category   | [R] General function prediction only             |           |
| 2572233374 | t3m_01731 | COG0433        | Predicted ATPase                                 | 1.00E-39  |
| 2572233374 | t3m_01731 | pfam01935      | DUF87                                            | 7.40E-31  |
| 2572233374 | t3m_01731 | Locus_type     | CDS                                              |           |
| 2572233374 | t3m_01731 | Product_name   | Predicted ATPase                                 |           |
| 2572233374 | t3m_01731 | Scaffold       | t3m_contig_70_870_len_10624_read_count_814288.56 |           |
| 2572233374 | t3m_01731 | Coordinates    | 728..2188(+)                                     |           |
| 2572233374 | t3m_01731 | DNA_length     | 1461bp                                           |           |
| 2572233374 | t3m_01731 | Protein_length | 486aa                                            |           |
| 2572233374 | t3m_01731 | GC             |                                                  | 0.67      |
|            |           |                |                                                  |           |
| 2572233375 | t3m_01732 | Locus_type     | CDS                                              |           |

|            |           |                |                                                  |           |
|------------|-----------|----------------|--------------------------------------------------|-----------|
| 2572233375 | t3m_01732 | Product_name   | hypothetical protein                             |           |
| 2572233375 | t3m_01732 | Scaffold       | t3m_contig_70_870_len_10624_read_count_814288.56 |           |
| 2572233375 | t3m_01732 | Coordinates    | 2198..2440(+)                                    |           |
| 2572233375 | t3m_01732 | DNA_length     | 243bp                                            |           |
| 2572233375 | t3m_01732 | Protein_length | 80aa                                             |           |
| 2572233375 | t3m_01732 | GC             |                                                  | 0.63      |
| 2572233376 | t3m_01733 | Metacyc        | PWY-5988: wound-induced proteolysis I            |           |
| 2572233376 | t3m_01733 | Metacyc        | PWY-6018: seed germination protein turnover      |           |
| 2572233376 | t3m_01733 | COG_category   | [E] Amino acid transport and metabolism          |           |
| 2572233376 | t3m_01733 | COG0260        | Leucyl aminopeptidase                            | 4.00E-123 |
| 2572233376 | t3m_01733 | pfam00883      | Peptidase_M17                                    | 5.30E-106 |
| 2572233376 | t3m_01733 | pfam02789      | Peptidase_M17_N                                  | 3.80E-21  |
| 2572233376 | t3m_01733 | EC:3.4.11.1    | Leucyl aminopeptidase.                           |           |
| 2572233376 | t3m_01733 | KO:K01255      | leucyl aminopeptidase [EC:3.4.11.1]              | 0.00E+00  |
| 2572233376 | t3m_01733 | Locus_type     | CDS                                              |           |
| 2572233376 | t3m_01733 | Product_name   | Leucyl aminopeptidase                            |           |
| 2572233376 | t3m_01733 | Scaffold       | t3m_contig_70_870_len_10624_read_count_814288.56 |           |
| 2572233376 | t3m_01733 | Coordinates    | 2508..4040(-)                                    |           |
| 2572233376 | t3m_01733 | DNA_length     | 1533bp                                           |           |
| 2572233376 | t3m_01733 | Protein_length | 510aa                                            |           |
| 2572233376 | t3m_01733 | GC             |                                                  | 0.69      |
| 2572233377 | t3m_01734 | pfam04472      | DUF552                                           | 7.70E-12  |
| 2572233377 | t3m_01734 | KO:K09152      | hypothetical protein                             | 1.00E-20  |
| 2572233377 | t3m_01734 | Locus_type     | CDS                                              |           |
| 2572233377 | t3m_01734 | Product_name   | Protein of unknown function (DUF552)             |           |
| 2572233377 | t3m_01734 | Scaffold       | t3m_contig_70_870_len_10624_read_count_814288.56 |           |
| 2572233377 | t3m_01734 | Coordinates    | 4062..4439(-)                                    |           |
| 2572233377 | t3m_01734 | DNA_length     | 378bp                                            |           |
| 2572233377 | t3m_01734 | Protein_length | 125aa                                            |           |
| 2572233377 | t3m_01734 | GC             |                                                  | 0.6       |
| 2572233378 | t3m_01735 | pfam04981      | NMD3                                             | 2.70E-35  |

|            |           |                |                                                                                                      |           |
|------------|-----------|----------------|------------------------------------------------------------------------------------------------------|-----------|
| 2572233378 | t3m_01735 | Locus_type     | CDS                                                                                                  |           |
| 2572233378 | t3m_01735 | Product_name   | NMD3 family                                                                                          |           |
| 2572233378 | t3m_01735 | Scaffold       | t3m_contig_70_870_len_10624_read_count_814288.56                                                     |           |
| 2572233378 | t3m_01735 | Coordinates    | 4492..5280(-)                                                                                        |           |
| 2572233378 | t3m_01735 | DNA_length     | 789bp                                                                                                |           |
| 2572233378 | t3m_01735 | Protein_length | 262aa                                                                                                |           |
| 2572233378 | t3m_01735 | GC             |                                                                                                      | 0.71      |
|            |           |                |                                                                                                      |           |
| 2572233379 | t3m_01736 | COG_category   | [S] Function unknown                                                                                 |           |
| 2572233379 | t3m_01736 | COG2412        | Uncharacterized conserved protein                                                                    | 3.00E-20  |
| 2572233379 | t3m_01736 | pfam04242      | DUF424                                                                                               | 4.10E-19  |
| 2572233379 | t3m_01736 | KO:K09148      | hypothetical protein                                                                                 | 1.80E-15  |
| 2572233379 | t3m_01736 | Locus_type     | CDS                                                                                                  |           |
| 2572233379 | t3m_01736 | Product_name   | Uncharacterized conserved protein                                                                    |           |
| 2572233379 | t3m_01736 | Scaffold       | t3m_contig_70_870_len_10624_read_count_814288.56                                                     |           |
| 2572233379 | t3m_01736 | Coordinates    | 5353..5667(-)                                                                                        |           |
| 2572233379 | t3m_01736 | DNA_length     | 315bp                                                                                                |           |
| 2572233379 | t3m_01736 | Protein_length | 104aa                                                                                                |           |
| 2572233379 | t3m_01736 | GC             |                                                                                                      | 0.72      |
|            |           |                |                                                                                                      |           |
| 2572233380 | t3m_01737 | IMG_pathway    | 436: Archaeal replication initiation                                                                 |           |
| 2572233380 | t3m_01737 | COG_category   | [L] Replication, recombination and repair                                                            |           |
| 2572233380 | t3m_01737 | COG1241        | Predicted ATPase involved in replication control, Cdc46/Mcm family                                   | 0.00E+00  |
| 2572233380 | t3m_01737 | pfam00493      | MCM                                                                                                  | 2.30E-125 |
| 2572233380 | t3m_01737 | EC:3.6.4.-     | Hydrolases. Acting on acid anhydrides. Acting on acid anhydrides; involved in cellular and subcellul |           |
| 2572233380 | t3m_01737 | KO:K10726      | replicative DNA helicase Mcm [EC:3.6.4.-]                                                            | 0.00E+00  |
| 2572233380 | t3m_01737 | ITERM:00094    | replicative DNA helicase Mcm (EC 3.6.1.-)                                                            |           |
| 2572233380 | t3m_01737 | Locus_type     | CDS                                                                                                  |           |
| 2572233380 | t3m_01737 | Product_name   | replicative DNA helicase Mcm (EC 3.6.1.-)                                                            |           |
| 2572233380 | t3m_01737 | Scaffold       | t3m_contig_70_870_len_10624_read_count_814288.56                                                     |           |
| 2572233380 | t3m_01737 | Coordinates    | 5735..7852(-)                                                                                        |           |
| 2572233380 | t3m_01737 | DNA_length     | 2118bp                                                                                               |           |
| 2572233380 | t3m_01737 | Protein_length | 705aa                                                                                                |           |
| 2572233380 | t3m_01737 | GC             |                                                                                                      | 0.69      |



|            |           |                |                                                                        |           |
|------------|-----------|----------------|------------------------------------------------------------------------|-----------|
| 2572233381 | t3m_01738 | KEGG_module    | M00359: Aminoacyl-tRNA biosynthesis, eukaryotes                        |           |
| 2572233381 | t3m_01738 | KEGG_module    | M00360: Aminoacyl-tRNA biosynthesis, prokaryotes                       |           |
| 2572233381 | t3m_01738 | Metacyc        | TRNA-CHARGING-PWY: tRNA charging                                       |           |
| 2572233381 | t3m_01738 | IMG_pathway    | 349: tRNA-dependent asparagine synthesis                               |           |
| 2572233381 | t3m_01738 | IMG_pathway    | 489: L-aspartate ligation to tRNA(Asp)                                 |           |
| 2572233381 | t3m_01738 | COG_category   | [J] Translation, ribosomal structure and biogenesis                    |           |
| 2572233381 | t3m_01738 | COG0017        | Aspartyl/asparaginyl-tRNA synthetases                                  | 3.00E-101 |
| 2572233381 | t3m_01738 | pfam00152      | tRNA-synt_2                                                            | 6.30E-83  |
| 2572233381 | t3m_01738 | EC:6.1.1.12    | Aspartate--tRNA ligase.                                                |           |
| 2572233381 | t3m_01738 | TIGR00458      | nondiscriminating aspartyl-tRNA synthetase                             | 1.40E-122 |
| 2572233381 | t3m_01738 | KO:K01876      | aspartyl-tRNA synthetase [EC:6.1.1.12]                                 | 0.00E+00  |
| 2572233381 | t3m_01738 | ITERM:00393    | aspartyl-tRNA synthetase (EC 6.1.1.12)                                 |           |
| 2572233381 | t3m_01738 | Locus_type     | CDS                                                                    |           |
| 2572233381 | t3m_01738 | Product_name   | aspartyl-tRNA synthetase (EC 6.1.1.12)                                 |           |
| 2572233381 | t3m_01738 | Scaffold       | t3m_contig_70_870_len_10624_read_count_814288.56                       |           |
| 2572233381 | t3m_01738 | Coordinates    | 7871..8971(-)                                                          |           |
| 2572233381 | t3m_01738 | DNA_length     | 1101bp                                                                 |           |
| 2572233381 | t3m_01738 | Protein_length | 366aa                                                                  |           |
| 2572233381 | t3m_01738 | GC             |                                                                        | 0.69      |
| 2572233382 | t3m_01739 | KEGG_module    | M00052: Pyrimidine ribonucleotide biosynthesis, UMP => UDP/UTP,CDP/CTP |           |
| 2572233382 | t3m_01739 | Metacyc        | PWY-7176: UTP and CTP <i>de novo</i> biosynthesis                      |           |
| 2572233382 | t3m_01739 | Metacyc        | PWY-7177: UTP and CTP dephosphorylation II                             |           |
| 2572233382 | t3m_01739 | Metacyc        | PWY-7185: UTP and CTP dephosphorylation I                              |           |
| 2572233382 | t3m_01739 | IMG_pathway    | 324: CTP synthesis                                                     |           |
| 2572233382 | t3m_01739 | COG_category   | [F] Nucleotide transport and metabolism                                |           |
| 2572233382 | t3m_01739 | COG0504        | CTP synthase (UTP-ammonia lyase)                                       | 0.00E+00  |
| 2572233382 | t3m_01739 | pfam06418      | CTP_synth_N                                                            | 1.60E-88  |
| 2572233382 | t3m_01739 | pfam00117      | GATase                                                                 | 1.30E-40  |
| 2572233382 | t3m_01739 | EC:6.3.4.2     | CTP synthase.                                                          |           |
| 2572233382 | t3m_01739 | TIGR00337      | CTP synthase                                                           | 0.00E+00  |
| 2572233382 | t3m_01739 | KO:K01937      | CTP synthase [EC:6.3.4.2]                                              | 0.00E+00  |
| 2572233382 | t3m_01739 | ITERM:01398    | CTP synthase (EC 6.3.4.2)                                              |           |

|            |           |                |                                                                                                 |          |
|------------|-----------|----------------|-------------------------------------------------------------------------------------------------|----------|
| 2572233382 | t3m_01739 | Locus_type     | CDS                                                                                             |          |
| 2572233382 | t3m_01739 | Product_name   | CTP synthase (EC 6.3.4.2)                                                                       |          |
| 2572233382 | t3m_01739 | Scaffold       | t3m_contig_70_870_len_10624_read_count_814288.56                                                |          |
| 2572233382 | t3m_01739 | Coordinates    | 9153..10622(-)                                                                                  |          |
| 2572233382 | t3m_01739 | DNA_length     | 1470bp                                                                                          |          |
| 2572233382 | t3m_01739 | Protein_length | 489aa                                                                                           |          |
| 2572233382 | t3m_01739 | GC             |                                                                                                 | 0.68     |
|            |           |                |                                                                                                 |          |
| 2572233383 | t3m_01740 | Metacyc        | LIPA-CORESYPN-PWY: Lipid A-core biosynthesis                                                    |          |
| 2572233383 | t3m_01740 | Metacyc        | SPHINGOLIPID-SYN-PWY: sphingolipid biosynthesis (yeast)                                         |          |
| 2572233383 | t3m_01740 | Metacyc        | PWY-6577: farnesylcysteine salvage pathway                                                      |          |
| 2572233383 | t3m_01740 | Metacyc        | PWY-6626: CDP-2-glycerol biosynthesis                                                           |          |
| 2572233383 | t3m_01740 | Metacyc        | PWY-7077: <i>N</i>-acetyl-D-galactosamine degradation                                           |          |
| 2572233383 | t3m_01740 | Metacyc        | PWY-6682: dehydrophos biosynthesis                                                              |          |
| 2572233383 | t3m_01740 | Metacyc        | PWY-5107: phytol salvage pathway                                                                |          |
| 2572233383 | t3m_01740 | Metacyc        | PWY-5129: sphingolipid biosynthesis (plants)                                                    |          |
| 2572233383 | t3m_01740 | COG_category   | [J] Translation, ribosomal structure and biogenesis                                             |          |
| 2572233383 | t3m_01740 | COG1859        | RNA:NAD 2'-phosphotransferase                                                                   | 9.00E-49 |
| 2572233383 | t3m_01740 | pfam01885      | PTS_2-RNA                                                                                       | 6.40E-35 |
| 2572233383 | t3m_01740 | EC:2.7.1.-     | Transferases. Transferring phosphorous-containing groups. Phosphotransferases with an alcohol g |          |
| 2572233383 | t3m_01740 | KO:K07559      | putative RNA 2'-phosphotransferase [EC:2.7.1.-]                                                 | 0.00E+00 |
| 2572233383 | t3m_01740 | Locus_type     | CDS                                                                                             |          |
| 2572233383 | t3m_01740 | Product_name   | RNA:NAD 2'-phosphotransferase                                                                   |          |
| 2572233383 | t3m_01740 | Scaffold       | t3m_contig_70_1041_len_9416_read_count_811947.57                                                |          |
| 2572233383 | t3m_01740 | Coordinates    | 1..603(+)                                                                                       |          |
| 2572233383 | t3m_01740 | DNA_length     | 603bp                                                                                           |          |
| 2572233383 | t3m_01740 | Protein_length | 200aa                                                                                           |          |
| 2572233383 | t3m_01740 | GC             |                                                                                                 | 0.67     |
|            |           |                |                                                                                                 |          |
| 2572233384 | t3m_01741 | COG_category   | [M] Cell wall/membrane/envelope biogenesis                                                      |          |
| 2572233384 | t3m_01741 | COG0463        | Glycosyltransferases involved in cell wall biogenesis                                           | 9.00E-19 |
| 2572233384 | t3m_01741 | pfam00535      | Glycos_transf_2                                                                                 | 1.20E-23 |
| 2572233384 | t3m_01741 | Locus_type     | CDS                                                                                             |          |
| 2572233384 | t3m_01741 | Product_name   | Glycosyltransferases involved in cell wall biogenesis                                           |          |

|            |           |                |                                                                                     |          |
|------------|-----------|----------------|-------------------------------------------------------------------------------------|----------|
| 2572233384 | t3m_01741 | Scaffold       | t3m_contig_70_1041_len_9416_read_count_811947.57                                    |          |
| 2572233384 | t3m_01741 | Coordinates    | 662..1804(-)                                                                        |          |
| 2572233384 | t3m_01741 | DNA_length     | 1143bp                                                                              |          |
| 2572233384 | t3m_01741 | Protein_length | 380aa                                                                               |          |
| 2572233384 | t3m_01741 | GC             |                                                                                     | 0.69     |
| 2572233384 | t3m_01741 | Transmembrane  | Yes                                                                                 |          |
| 2572233385 | t3m_01742 | KEGG_module    | M00413: FA core complex                                                             |          |
| 2572233385 | t3m_01742 | COG_category   | [L] Replication, recombination and repair                                           |          |
| 2572233385 | t3m_01742 | COG1111        | ERCC4-like helicases                                                                | 0.00E+00 |
| 2572233385 | t3m_01742 | pfam00271      | Helicase_C                                                                          | 3.30E-20 |
| 2572233385 | t3m_01742 | pfam00270      | DEAD                                                                                | 5.40E-18 |
| 2572233385 | t3m_01742 | KO:K10896      | fanconi anemia group M protein                                                      | 0.00E+00 |
| 2572233385 | t3m_01742 | Locus_type     | CDS                                                                                 |          |
| 2572233385 | t3m_01742 | Product_name   | ERCC4-like helicases                                                                |          |
| 2572233385 | t3m_01742 | Scaffold       | t3m_contig_70_1041_len_9416_read_count_811947.57                                    |          |
| 2572233385 | t3m_01742 | Coordinates    | 1866..3470(+)                                                                       |          |
| 2572233385 | t3m_01742 | DNA_length     | 1605bp                                                                              |          |
| 2572233385 | t3m_01742 | Protein_length | 534aa                                                                               |          |
| 2572233385 | t3m_01742 | GC             |                                                                                     | 0.7      |
| 2572233386 | t3m_01743 | KEGG_module    | M00053: Pyrimidine deoxyribonucleotide biosynthesis, CDP/CTP => dCDP/dCTP,dTDP/dTTP |          |
| 2572233386 | t3m_01743 | COG_category   | [F] Nucleotide transport and metabolism                                             |          |
| 2572233386 | t3m_01743 | COG0756        | dUTPase                                                                             | 3.00E-25 |
| 2572233386 | t3m_01743 | pfam00692      | dUTPase                                                                             | 6.40E-17 |
| 2572233386 | t3m_01743 | EC:3.6.1.23    | dUTP diphosphatase.                                                                 |          |
| 2572233386 | t3m_01743 | TIGR00576      | deoxyuridine 5'-triphosphate nucleotidohydrolase (dut)                              | 2.20E-33 |
| 2572233386 | t3m_01743 | KO:K01520      | dUTP pyrophosphatase [EC:3.6.1.23]                                                  | 6.80E-22 |
| 2572233386 | t3m_01743 | Locus_type     | CDS                                                                                 |          |
| 2572233386 | t3m_01743 | Product_name   | dUTPase                                                                             |          |
| 2572233386 | t3m_01743 | Scaffold       | t3m_contig_70_1041_len_9416_read_count_811947.57                                    |          |
| 2572233386 | t3m_01743 | Coordinates    | 3467..3883(-)                                                                       |          |
| 2572233386 | t3m_01743 | DNA_length     | 417bp                                                                               |          |
| 2572233386 | t3m_01743 | Protein_length | 138aa                                                                               |          |

|            |           |                |                                                                        |          |
|------------|-----------|----------------|------------------------------------------------------------------------|----------|
| 2572233386 | t3m_01743 | GC             |                                                                        | 0.71     |
| 2572233387 | t3m_01744 | COG_category   | [R] General function prediction only                                   |          |
| 2572233387 | t3m_01744 | COG3413        | Predicted DNA binding protein                                          | 1.00E-10 |
| 2572233387 | t3m_01744 | pfam04967      | HTH_10                                                                 | 5.70E-13 |
| 2572233387 | t3m_01744 | Locus_type     | CDS                                                                    |          |
| 2572233387 | t3m_01744 | Product_name   | Predicted DNA binding protein                                          |          |
| 2572233387 | t3m_01744 | Scaffold       | t3m_contig_70_1041_len_9416_read_count_811947.57                       |          |
| 2572233387 | t3m_01744 | Coordinates    | 3936..4670(-)                                                          |          |
| 2572233387 | t3m_01744 | DNA_length     | 735bp                                                                  |          |
| 2572233387 | t3m_01744 | Protein_length | 244aa                                                                  |          |
| 2572233387 | t3m_01744 | GC             |                                                                        | 0.69     |
| 2572233388 | t3m_01745 | KEGG_module    | M00117: Ubiquinone biosynthesis, prokaryotes, chorismate => ubiquinone |          |
| 2572233388 | t3m_01745 | Metacyc        | PWY-6627: salinosporamide A biosynthesis                               |          |
| 2572233388 | t3m_01745 | Metacyc        | PWY-6585: 2-tridecanone biosynthesis                                   |          |
| 2572233388 | t3m_01745 | Metacyc        | PWY-5826: hypoglycin biosynthesis                                      |          |
| 2572233388 | t3m_01745 | Metacyc        | PWY30-19: ubiquinol-6 biosynthesis (eukaryotic)                        |          |
| 2572233388 | t3m_01745 | Metacyc        | PWY-6708: ubiquinol-8 biosynthesis (prokaryotic)                       |          |
| 2572233388 | t3m_01745 | Metacyc        | PWY-7007: methyl ketone biosynthesis                                   |          |
| 2572233388 | t3m_01745 | Metacyc        | PWY-5163: <math>p</math>-cumate degradation to 2-oxopent-4-enoate      |          |
| 2572233388 | t3m_01745 | Metacyc        | PWY-5873: ubiquinol-7 biosynthesis (eukaryotic)                        |          |
| 2572233388 | t3m_01745 | Metacyc        | PWY-5872: ubiquinol-10 biosynthesis (eukaryotic)                       |          |
| 2572233388 | t3m_01745 | Metacyc        | PWY-5856: ubiquinol-9 biosynthesis (prokaryotic)                       |          |
| 2572233388 | t3m_01745 | Metacyc        | PWY-5870: ubiquinol-8 biosynthesis (eukaryotic)                        |          |
| 2572233388 | t3m_01745 | Metacyc        | PWY-181: photorespiration                                              |          |
| 2572233388 | t3m_01745 | Metacyc        | PWY-3385: choline biosynthesis I                                       |          |
| 2572233388 | t3m_01745 | Metacyc        | PWY-5871: ubiquinol-9 biosynthesis (eukaryotic)                        |          |
| 2572233388 | t3m_01745 | Metacyc        | PWY-5855: ubiquinol-7 biosynthesis (prokaryotic)                       |          |
| 2572233388 | t3m_01745 | Metacyc        | PWY-5857: ubiquinol-10 biosynthesis (prokaryotic)                      |          |
| 2572233388 | t3m_01745 | Metacyc        | PWY-5113: UDP-D-apiiose biosynthesis (from UDP-D-glucuronate)          |          |
| 2572233388 | t3m_01745 | Metacyc        | PWY-6559: spermidine biosynthesis II                                   |          |
| 2572233388 | t3m_01745 | COG_category   | [H] Coenzyme transport and metabolism                                  |          |
| 2572233388 | t3m_01745 | COG0043        | 3-polyprenyl-4-hydroxybenzoate decarboxylase and related decarboxyl    | 0.00E+00 |

|            |           |                |                                                                        |          |
|------------|-----------|----------------|------------------------------------------------------------------------|----------|
| 2572233388 | t3m_01745 | pfam01977      | UbiD                                                                   | 0.00E+00 |
| 2572233388 | t3m_01745 | EC:4.1.1.-     | Lyases. Carbon-carbon lyases. Carboxy-lyases.                          |          |
| 2572233388 | t3m_01745 | TIGR00148      | UbiD family decarboxylase                                              | 0.00E+00 |
| 2572233388 | t3m_01745 | TIGR03701      | menaquinone biosynthesis decarboxylase, SCO4490 family                 | 0.00E+00 |
| 2572233388 | t3m_01745 | KO:K03182      | 3-octaprenyl-4-hydroxybenzoate carboxy-lyase UbiD [EC:4.1.1.-]         | 0.00E+00 |
| 2572233388 | t3m_01745 | Locus_type     | CDS                                                                    |          |
| 2572233388 | t3m_01745 | Product_name   | menaquinone biosynthesis decarboxylase, SCO4490 family                 |          |
| 2572233388 | t3m_01745 | Scaffold       | t3m_contig_70_1041_len_9416_read_count_811947.57                       |          |
| 2572233388 | t3m_01745 | Coordinates    | 4751..6232(+)                                                          |          |
| 2572233388 | t3m_01745 | DNA_length     | 1482bp                                                                 |          |
| 2572233388 | t3m_01745 | Protein_length | 493aa                                                                  |          |
| 2572233388 | t3m_01745 | GC             |                                                                        | 0.68     |
| 2572233389 | t3m_01746 | KEGG_module    | M00117: Ubiquinone biosynthesis, prokaryotes, chorismate => ubiquinone |          |
| 2572233389 | t3m_01746 | Metacyc        | PWY-5133: cohumulone biosynthesis                                      |          |
| 2572233389 | t3m_01746 | Metacyc        | PWY-5068: chlorophyll cycle                                            |          |
| 2572233389 | t3m_01746 | Metacyc        | PWY-702: methionine biosynthesis II                                    |          |
| 2572233389 | t3m_01746 | Metacyc        | PWY-4681: kievitone biosynthesis                                       |          |
| 2572233389 | t3m_01746 | Metacyc        | PWY-5365: linear furanocoumarin biosynthesis                           |          |
| 2572233389 | t3m_01746 | Metacyc        | PWY-5132: humulone biosynthesis                                        |          |
| 2572233389 | t3m_01746 | Metacyc        | PWY-5064: chlorophyll <i>a</i> biosynthesis II                         |          |
| 2572233389 | t3m_01746 | Metacyc        | PWY-5027: phylloquinol biosynthesis                                    |          |
| 2572233389 | t3m_01746 | Metacyc        | PWY-6262: demethylmenaquinol-8 biosynthesis II                         |          |
| 2572233389 | t3m_01746 | Metacyc        | PWY-2681: <i>trans</i> -zeatin biosynthesis                            |          |
| 2572233389 | t3m_01746 | Metacyc        | PWY-5770: phenazine-1-carboxylate biosynthesis                         |          |
| 2572233389 | t3m_01746 | Metacyc        | PWY-4502: wighteone and luteone biosynthesis                           |          |
| 2572233389 | t3m_01746 | Metacyc        | PWY-6403: carrageenan biosynthesis                                     |          |
| 2572233389 | t3m_01746 | Metacyc        | PWY-6834: spermidine biosynthesis III                                  |          |
| 2572233389 | t3m_01746 | Metacyc        | PWY-5808: hyperforin and adhyperforin biosynthesis                     |          |
| 2572233389 | t3m_01746 | Metacyc        | PWY-5135: xanthohumol biosynthesis                                     |          |
| 2572233389 | t3m_01746 | Metacyc        | PWY-5802: alizarin biosynthesis                                        |          |
| 2572233389 | t3m_01746 | Metacyc        | PWY-7169: hyperxanthone E biosynthesis                                 |          |
| 2572233389 | t3m_01746 | Metacyc        | PWY-6936: seleno-amino acid biosynthesis                               |          |
| 2572233389 | t3m_01746 | Metacyc        | PWY-5893: tridecaprenyl diphosphate biosynthesis                       |          |

|            |           |                |                                                                                                       |          |
|------------|-----------|----------------|-------------------------------------------------------------------------------------------------------|----------|
| 2572233389 | t3m_01746 | Metacyc        | PWY-5817: dodecaprenyl diphosphate biosynthesis                                                       |          |
| 2572233389 | t3m_01746 | Metacyc        | PWY-6793: demethylmenaquinol-8 biosynthesis III                                                       |          |
| 2572233389 | t3m_01746 | Metacyc        | PWY-6681: neurosporaxanthin biosynthesis                                                              |          |
| 2572233389 | t3m_01746 | Metacyc        | PWY-5816: all <i>trans</i> undecaprenyl diphosphate biosynthesis                                      |          |
| 2572233389 | t3m_01746 | IMG_pathway    | 209: Ubiquinone biosynthesis                                                                          |          |
| 2572233389 | t3m_01746 | COG_category   | [H] Coenzyme transport and metabolism                                                                 |          |
| 2572233389 | t3m_01746 | COG0382        | 4-hydroxybenzoate polyprenyltransferase and related prenyltransferase                                 | 3.00E-26 |
| 2572233389 | t3m_01746 | pfam01040      | UbiA                                                                                                  | 3.10E-30 |
| 2572233389 | t3m_01746 | EC:2.5.1.-     | Transferases. Transferring alkyl or aryl groups, other than methyl groups. Transferring alkyl or aryl |          |
| 2572233389 | t3m_01746 | TIGR01475      | putative 4-hydroxybenzoate polyprenyltransferase                                                      | 4.20E-61 |
| 2572233389 | t3m_01746 | KO:K03179      | 4-hydroxybenzoate octaprenyltransferase [EC:2.5.1.-]                                                  | 3.70E-41 |
| 2572233389 | t3m_01746 | ITERM:00553    | 4-hydroxybenzoate polyprenyltransferase (EC 2.5.1.39)                                                 |          |
| 2572233389 | t3m_01746 | Locus_type     | CDS                                                                                                   |          |
| 2572233389 | t3m_01746 | Product_name   | 4-hydroxybenzoate polyprenyltransferase (EC 2.5.1.39)                                                 |          |
| 2572233389 | t3m_01746 | Scaffold       | t3m_contig_70_1041_len_9416_read_count_811947.57                                                      |          |
| 2572233389 | t3m_01746 | Coordinates    | 6229..7119(+)                                                                                         |          |
| 2572233389 | t3m_01746 | DNA_length     | 891bp                                                                                                 |          |
| 2572233389 | t3m_01746 | Protein_length | 296aa                                                                                                 |          |
| 2572233389 | t3m_01746 | GC             |                                                                                                       | 0.69     |
| 2572233389 | t3m_01746 | Transmembrane  | Yes                                                                                                   |          |
| 2572233390 | t3m_01747 | Locus_type     | CDS                                                                                                   |          |
| 2572233390 | t3m_01747 | Product_name   | hypothetical protein                                                                                  |          |
| 2572233390 | t3m_01747 | Scaffold       | t3m_contig_70_1041_len_9416_read_count_811947.57                                                      |          |
| 2572233390 | t3m_01747 | Coordinates    | 7189..7539(+)                                                                                         |          |
| 2572233390 | t3m_01747 | DNA_length     | 351bp                                                                                                 |          |
| 2572233390 | t3m_01747 | Protein_length | 116aa                                                                                                 |          |
| 2572233390 | t3m_01747 | GC             |                                                                                                       | 0.7      |
| 2572233391 | t3m_01748 | Metacyc        | PWY-6720: toyocamycin biosynthesis                                                                    |          |
| 2572233391 | t3m_01748 | Metacyc        | PWY-7018: paromomycin biosynthesis                                                                    |          |
| 2572233391 | t3m_01748 | Metacyc        | PWY-5800: xylan biosynthesis                                                                          |          |
| 2572233391 | t3m_01748 | Metacyc        | PWY-7015: ribostamycin biosynthesis                                                                   |          |
| 2572233391 | t3m_01748 | Metacyc        | PWY-5381: pyridine nucleotide cycling (plants)                                                        |          |

|            |           |                |                                                           |          |
|------------|-----------|----------------|-----------------------------------------------------------|----------|
| 2572233391 | t3m_01748 | Metacyc        | PWY-7025: gentamicin biosynthesis                         |          |
| 2572233391 | t3m_01748 | Metacyc        | HISTSYN-PWY: histidine biosynthesis                       |          |
| 2572233391 | t3m_01748 | Metacyc        | PWY-6148: tetrahydromethanopterin biosynthesis            |          |
| 2572233391 | t3m_01748 | COG_category   | [J] Translation, ribosomal structure and biogenesis       |          |
| 2572233391 | t3m_01748 | COG1549        | Queuine tRNA-ribosyltransferases, contain PUA domain      | 8.00E-69 |
| 2572233391 | t3m_01748 | pfam01472      | PUA                                                       | 8.40E-08 |
| 2572233391 | t3m_01748 | pfam14810      | TGT_C2                                                    | 7.90E-08 |
| 2572233391 | t3m_01748 | EC:2.4.2.-     | Transferases. Glycosyltransferases. Pentosyltransferases. |          |
| 2572233391 | t3m_01748 | KO:K07557      | archaeosine tRNA-ribosyltransferase [EC:2.4.2.-]          | 0.00E+00 |
| 2572233391 | t3m_01748 | Locus_type     | CDS                                                       |          |
| 2572233391 | t3m_01748 | Product_name   | Queuine tRNA-ribosyltransferases, contain PUA domain      |          |
| 2572233391 | t3m_01748 | Scaffold       | t3m_contig_70_1041_len_9416_read_count_811947.57          |          |
| 2572233391 | t3m_01748 | Coordinates    | 7580..9415(+)                                             |          |
| 2572233391 | t3m_01748 | DNA_length     | 1836bp                                                    |          |
| 2572233391 | t3m_01748 | Protein_length | 612aa                                                     |          |
| 2572233391 | t3m_01748 | GC             |                                                           | 0.71     |
|            |           |                |                                                           |          |
| 2572233392 | t3m_01749 | Locus_type     | CDS                                                       |          |
| 2572233392 | t3m_01749 | Product_name   | hypothetical protein                                      |          |
| 2572233392 | t3m_01749 | Scaffold       | t3m_contig_70_1050_len_9331_read_count_809888.58          |          |
| 2572233392 | t3m_01749 | Coordinates    | 3..518(+)                                                 |          |
| 2572233392 | t3m_01749 | DNA_length     | 516bp                                                     |          |
| 2572233392 | t3m_01749 | Protein_length | 171aa                                                     |          |
| 2572233392 | t3m_01749 | GC             |                                                           | 0.63     |
| 2572233392 | t3m_01749 | Transmembrane  | Yes                                                       |          |
|            |           |                |                                                           |          |
| 2572233393 | t3m_01750 | COG_category   | [R] General function prediction only                      |          |
| 2572233393 | t3m_01750 | COG1926        | Predicted phosphoribosyltransferases                      | 1.00E-53 |
| 2572233393 | t3m_01750 | pfam00156      | Pribosyltran                                              | 2.70E-27 |
| 2572233393 | t3m_01750 | Locus_type     | CDS                                                       |          |
| 2572233393 | t3m_01750 | Product_name   | Predicted phosphoribosyltransferases                      |          |
| 2572233393 | t3m_01750 | Scaffold       | t3m_contig_70_1050_len_9331_read_count_809888.58          |          |
| 2572233393 | t3m_01750 | Coordinates    | 611..1291(+)                                              |          |
| 2572233393 | t3m_01750 | DNA_length     | 681bp                                                     |          |

|            |           |                |                                                                  |          |
|------------|-----------|----------------|------------------------------------------------------------------|----------|
| 2572233393 | t3m_01750 | Protein_length | 226aa                                                            |          |
| 2572233393 | t3m_01750 | GC             |                                                                  | 0.73     |
| 2572233394 | t3m_01751 | COG_category   | [R] General function prediction only                             |          |
| 2572233394 | t3m_01751 | COG0517        | FOG: CBS domain                                                  | 2.00E-12 |
| 2572233394 | t3m_01751 | pfam00571      | CBS                                                              | 3.60E-17 |
| 2572233394 | t3m_01751 | pfam00571      | CBS                                                              | 8.20E-16 |
| 2572233394 | t3m_01751 | Locus_type     | CDS                                                              |          |
| 2572233394 | t3m_01751 | Product_name   | FOG: CBS domain                                                  |          |
| 2572233394 | t3m_01751 | Scaffold       | t3m_contig_70_1050_len_9331_read_count_809888.58                 |          |
| 2572233394 | t3m_01751 | Coordinates    | 1384..1941(+)                                                    |          |
| 2572233394 | t3m_01751 | DNA_length     | 558bp                                                            |          |
| 2572233394 | t3m_01751 | Protein_length | 185aa                                                            |          |
| 2572233394 | t3m_01751 | GC             |                                                                  | 0.67     |
| 2572233395 | t3m_01752 | COG_category   | [O] Posttranslational modification, protein turnover, chaperones |          |
| 2572233395 | t3m_01752 | COG1765        | Predicted redox protein, regulator of disulfide bond formation   | 3.00E-08 |
| 2572233395 | t3m_01752 | pfam02566      | OsmC                                                             | 6.70E-12 |
| 2572233395 | t3m_01752 | Locus_type     | CDS                                                              |          |
| 2572233395 | t3m_01752 | Product_name   | Predicted redox protein, regulator of disulfide bond formation   |          |
| 2572233395 | t3m_01752 | Scaffold       | t3m_contig_70_1050_len_9331_read_count_809888.58                 |          |
| 2572233395 | t3m_01752 | Coordinates    | 1981..2403(-)                                                    |          |
| 2572233395 | t3m_01752 | DNA_length     | 423bp                                                            |          |
| 2572233395 | t3m_01752 | Protein_length | 140aa                                                            |          |
| 2572233395 | t3m_01752 | GC             |                                                                  | 0.71     |
| 2572233396 | t3m_01753 | pfam13847      | Methyltransf_31                                                  | 2.20E-14 |
| 2572233396 | t3m_01753 | Locus_type     | CDS                                                              |          |
| 2572233396 | t3m_01753 | Product_name   | Methyltransferase domain                                         |          |
| 2572233396 | t3m_01753 | Scaffold       | t3m_contig_70_1050_len_9331_read_count_809888.58                 |          |
| 2572233396 | t3m_01753 | Coordinates    | 2469..3083(-)                                                    |          |
| 2572233396 | t3m_01753 | DNA_length     | 615bp                                                            |          |
| 2572233396 | t3m_01753 | Protein_length | 204aa                                                            |          |
| 2572233396 | t3m_01753 | GC             |                                                                  | 0.69     |



|            |           |                |                                                                  |          |
|------------|-----------|----------------|------------------------------------------------------------------|----------|
| 2572233397 | t3m_01754 | Locus_type     | CDS                                                              |          |
| 2572233397 | t3m_01754 | Product_name   | hypothetical protein                                             |          |
| 2572233397 | t3m_01754 | Scaffold       | t3m_contig_70_1050_len_9331_read_count_809888.58                 |          |
| 2572233397 | t3m_01754 | Coordinates    | 3422..3892(-)                                                    |          |
| 2572233397 | t3m_01754 | DNA_length     | 471bp                                                            |          |
| 2572233397 | t3m_01754 | Protein_length | 156aa                                                            |          |
| 2572233397 | t3m_01754 | GC             |                                                                  | 0.64     |
| 2572233397 | t3m_01754 | Transmembrane  | Yes                                                              |          |
| 2572233398 | t3m_01755 | COG_category   | [C] Energy production and conversion                             |          |
| 2572233398 | t3m_01755 | COG_category   | [R] General function prediction only                             |          |
| 2572233398 | t3m_01755 | COG0604        | NADPH:quinone reductase and related Zn-dependent oxidoreductases | 3.00E-39 |
| 2572233398 | t3m_01755 | pfam08240      | ADH_N                                                            | 1.40E-10 |
| 2572233398 | t3m_01755 | pfam00107      | ADH_zinc_N                                                       | 3.90E-09 |
| 2572233398 | t3m_01755 | Locus_type     | CDS                                                              |          |
| 2572233398 | t3m_01755 | Product_name   | NADPH:quinone reductase and related Zn-dependent oxidoreductases |          |
| 2572233398 | t3m_01755 | Scaffold       | t3m_contig_70_1050_len_9331_read_count_809888.58                 |          |
| 2572233398 | t3m_01755 | Coordinates    | 3997..4947(+)                                                    |          |
| 2572233398 | t3m_01755 | DNA_length     | 951bp                                                            |          |
| 2572233398 | t3m_01755 | Protein_length | 316aa                                                            |          |
| 2572233398 | t3m_01755 | GC             |                                                                  | 0.69     |
| 2572233399 | t3m_01756 | pfam09360      | zf-CDGSH                                                         | 9.30E-14 |
| 2572233399 | t3m_01756 | Locus_type     | CDS                                                              |          |
| 2572233399 | t3m_01756 | Product_name   | Iron-binding zinc finger CDGSH type                              |          |
| 2572233399 | t3m_01756 | Scaffold       | t3m_contig_70_1050_len_9331_read_count_809888.58                 |          |
| 2572233399 | t3m_01756 | Coordinates    | 5042..5218(-)                                                    |          |
| 2572233399 | t3m_01756 | DNA_length     | 177bp                                                            |          |
| 2572233399 | t3m_01756 | Protein_length | 58aa                                                             |          |
| 2572233399 | t3m_01756 | GC             |                                                                  | 0.61     |
| 2572233400 | t3m_01757 | COG_category   | [C] Energy production and conversion                             |          |
| 2572233400 | t3m_01757 | COG1042        | Acyl-CoA synthetase (NDP forming)                                | 0.00E+00 |

|            |           |                |                                                          |          |
|------------|-----------|----------------|----------------------------------------------------------|----------|
| 2572233400 | t3m_01757 | pfam13549      | ATP-grasp_5                                              | 2.90E-84 |
| 2572233400 | t3m_01757 | pfam13380      | CoA_binding_2                                            | 1.70E-21 |
| 2572233400 | t3m_01757 | pfam13607      | Succ_CoA_lig                                             | 1.00E-56 |
| 2572233400 | t3m_01757 | pfam13302      | Acetyltransf_3                                           | 1.00E-10 |
| 2572233400 | t3m_01757 | TIGR02717      | acetyl coenzyme A synthetase (ADP forming), alpha domain | 0.00E+00 |
| 2572233400 | t3m_01757 | KO:K09181      | hypothetical protein                                     | 0.00E+00 |
| 2572233400 | t3m_01757 | Locus_type     | CDS                                                      |          |
| 2572233400 | t3m_01757 | Product_name   | Acyl-CoA synthetase (NDP forming)                        |          |
| 2572233400 | t3m_01757 | Scaffold       | t3m_contig_70_1050_len_9331_read_count_809888.58         |          |
| 2572233400 | t3m_01757 | Coordinates    | 5427..8216(+)                                            |          |
| 2572233400 | t3m_01757 | DNA_length     | 2790bp                                                   |          |
| 2572233400 | t3m_01757 | Protein_length | 929aa                                                    |          |
| 2572233400 | t3m_01757 | GC             |                                                          | 0.65     |
|            |           |                |                                                          |          |
| 2572233401 | t3m_01758 | Locus_type     | CDS                                                      |          |
| 2572233401 | t3m_01758 | Product_name   | hypothetical protein                                     |          |
| 2572233401 | t3m_01758 | Scaffold       | t3m_contig_70_1050_len_9331_read_count_809888.58         |          |
| 2572233401 | t3m_01758 | Coordinates    | 8334..8675(-)                                            |          |
| 2572233401 | t3m_01758 | DNA_length     | 342bp                                                    |          |
| 2572233401 | t3m_01758 | Protein_length | 113aa                                                    |          |
| 2572233401 | t3m_01758 | GC             |                                                          | 0.64     |
|            |           |                |                                                          |          |
| 2572233402 | t3m_01759 | pfam01467      | CTP_transf_2                                             | 1.80E-11 |
| 2572233402 | t3m_01759 | TIGR00125      | cytidyltransferase-like domain                           | 8.20E-17 |
| 2572233402 | t3m_01759 | Locus_type     | CDS                                                      |          |
| 2572233402 | t3m_01759 | Product_name   | cytidyltransferase-like domain                           |          |
| 2572233402 | t3m_01759 | Scaffold       | t3m_contig_70_1050_len_9331_read_count_809888.58         |          |
| 2572233402 | t3m_01759 | Coordinates    | 8878..9252(-)                                            |          |
| 2572233402 | t3m_01759 | DNA_length     | 375bp                                                    |          |
| 2572233402 | t3m_01759 | Protein_length | 124aa                                                    |          |
| 2572233402 | t3m_01759 | GC             |                                                          | 0.61     |
|            |           |                |                                                          |          |
| 2572233403 | t3m_01760 | Locus_type     | tRNA                                                     |          |
| 2572233403 | t3m_01760 | Product_name   | tRNA_Ala_CGC                                             |          |

|            |           |                |                                                                   |                                                                   |          |
|------------|-----------|----------------|-------------------------------------------------------------------|-------------------------------------------------------------------|----------|
| 2572233403 | t3m_01760 | Scaffold       |                                                                   | t3m_contig_70_1050_len_9331_read_count_809888.58                  |          |
| 2572233403 | t3m_01760 | Coordinates    |                                                                   | 9264..9330(-)                                                     |          |
| 2572233403 | t3m_01760 | DNA_length     |                                                                   | 67bp                                                              |          |
| 2572233403 | t3m_01760 | GC             |                                                                   |                                                                   | 0.58     |
| 2572233404 | t3m_01761 | pfam00361      | Oxidored_q1                                                       |                                                                   | 4.40E-18 |
| 2572233404 | t3m_01761 | Locus_type     |                                                                   | CDS                                                               |          |
| 2572233404 | t3m_01761 | Product_name   |                                                                   | NADH-Ubiquinone/plastoquinone (complex I), various chains         |          |
| 2572233404 | t3m_01761 | Scaffold       |                                                                   | t3m_contig_70_1156_len_8766_read_count_661841.59                  |          |
| 2572233404 | t3m_01761 | Coordinates    |                                                                   | 1..615(+)                                                         |          |
| 2572233404 | t3m_01761 | DNA_length     |                                                                   | 615bp                                                             |          |
| 2572233404 | t3m_01761 | Protein_length |                                                                   | 204aa                                                             |          |
| 2572233404 | t3m_01761 | GC             |                                                                   |                                                                   | 0.7      |
| 2572233404 | t3m_01761 | Transmembrane  |                                                                   | Yes                                                               |          |
| 2572233405 | t3m_01762 | COG_category   | [C] Energy production and conversion                              |                                                                   |          |
| 2572233405 | t3m_01762 | COG0644        | Dehydrogenases (flavoproteins)                                    |                                                                   | 3.00E-41 |
| 2572233405 | t3m_01762 | pfam01494      | FAD_binding_3                                                     |                                                                   | 9.20E-08 |
| 2572233405 | t3m_01762 | TIGR02032      | geranylgeranyl reductase family                                   |                                                                   | 5.20E-61 |
| 2572233405 | t3m_01762 | ITERM:05619    | 2,3-di-O-geranylgeranylglyceryl phosphate reductase (EC 1.3.99.-) |                                                                   |          |
| 2572233405 | t3m_01762 | Locus_type     |                                                                   | CDS                                                               |          |
| 2572233405 | t3m_01762 | Product_name   |                                                                   | 2,3-di-O-geranylgeranylglyceryl phosphate reductase (EC 1.3.99.-) |          |
| 2572233405 | t3m_01762 | Scaffold       |                                                                   | t3m_contig_70_1156_len_8766_read_count_661841.59                  |          |
| 2572233405 | t3m_01762 | Coordinates    |                                                                   | 623..1723(+)                                                      |          |
| 2572233405 | t3m_01762 | DNA_length     |                                                                   | 1101bp                                                            |          |
| 2572233405 | t3m_01762 | Protein_length |                                                                   | 366aa                                                             |          |
| 2572233405 | t3m_01762 | GC             |                                                                   |                                                                   | 0.73     |
| 2572233406 | t3m_01763 | Metacyc        | PWY-5783: octaprenyl diphosphate biosynthesis                     |                                                                   |          |
| 2572233406 | t3m_01763 | COG_category   | [H] Coenzyme transport and metabolism                             |                                                                   |          |
| 2572233406 | t3m_01763 | COG0142        | Geranylgeranyl pyrophosphate synthase                             |                                                                   | 2.00E-60 |
| 2572233406 | t3m_01763 | pfam00348      | polyprenyl_synt                                                   |                                                                   | 7.90E-52 |
| 2572233406 | t3m_01763 | EC:2.5.1.90    | All-trans-octaprenyl-diphosphate synthase.                        |                                                                   |          |
| 2572233406 | t3m_01763 | KO:K02523      | octaprenyl-diphosphate synthase [EC:2.5.1.90]                     |                                                                   | 0.00E+00 |

|            |           |                |                                                  |          |
|------------|-----------|----------------|--------------------------------------------------|----------|
| 2572233406 | t3m_01763 | Locus_type     | CDS                                              |          |
| 2572233406 | t3m_01763 | Product_name   | Geranylgeranyl pyrophosphate synthase            |          |
| 2572233406 | t3m_01763 | Scaffold       | t3m_contig_70_1156_len_8766_read_count_661841.59 |          |
| 2572233406 | t3m_01763 | Coordinates    | 1720..2775(+)                                    |          |
| 2572233406 | t3m_01763 | DNA_length     | 1056bp                                           |          |
| 2572233406 | t3m_01763 | Protein_length | 351aa                                            |          |
| 2572233406 | t3m_01763 | GC             |                                                  | 0.7      |
|            |           |                |                                                  |          |
| 2572233407 | t3m_01764 | Locus_type     | CDS                                              |          |
| 2572233407 | t3m_01764 | Product_name   | hypothetical protein                             |          |
| 2572233407 | t3m_01764 | Scaffold       | t3m_contig_70_1156_len_8766_read_count_661841.59 |          |
| 2572233407 | t3m_01764 | Coordinates    | 2842..3309(+)                                    |          |
| 2572233407 | t3m_01764 | DNA_length     | 468bp                                            |          |
| 2572233407 | t3m_01764 | Protein_length | 155aa                                            |          |
| 2572233407 | t3m_01764 | GC             |                                                  | 0.66     |
| 2572233407 | t3m_01764 | Transmembrane  | Yes                                              |          |
|            |           |                |                                                  |          |
| 2572233408 | t3m_01765 | COG_category   | [R] General function prediction only             |          |
| 2572233408 | t3m_01765 | COG0388        | Predicted amidohydrolase                         | 2.00E-38 |
| 2572233408 | t3m_01765 | pfam00795      | CN_hydrolase                                     | 2.10E-21 |
| 2572233408 | t3m_01765 | Locus_type     | CDS                                              |          |
| 2572233408 | t3m_01765 | Product_name   | Predicted amidohydrolase                         |          |
| 2572233408 | t3m_01765 | Scaffold       | t3m_contig_70_1156_len_8766_read_count_661841.59 |          |
| 2572233408 | t3m_01765 | Coordinates    | 3309..4166(+)                                    |          |
| 2572233408 | t3m_01765 | DNA_length     | 858bp                                            |          |
| 2572233408 | t3m_01765 | Protein_length | 285aa                                            |          |
| 2572233408 | t3m_01765 | GC             |                                                  | 0.72     |
|            |           |                |                                                  |          |
| 2572233409 | t3m_01766 | COG_category   | [L] Replication, recombination and repair        |          |
| 2572233409 | t3m_01766 | COG1389        | DNA topoisomerase VI, subunit B                  | 0.00E+00 |
| 2572233409 | t3m_01766 | pfam02518      | HATPase_c                                        | 3.40E-10 |
| 2572233409 | t3m_01766 | pfam09239      | Topo-VIb_trans                                   | 6.90E-56 |
| 2572233409 | t3m_01766 | EC:5.99.1.3    | DNA topoisomerase (ATP-hydrolyzing).             |          |
| 2572233409 | t3m_01766 | TIGR01052      | DNA topoisomerase VI, B subunit                  | 0.00E+00 |

|            |           |                |                                                                           |           |
|------------|-----------|----------------|---------------------------------------------------------------------------|-----------|
| 2572233409 | t3m_01766 | KO:K03167      | DNA topoisomerase VI subunit B [EC:5.99.1.3]                              | 0.00E+00  |
| 2572233409 | t3m_01766 | Locus_type     | CDS                                                                       |           |
| 2572233409 | t3m_01766 | Product_name   | DNA topoisomerase VI, B subunit                                           |           |
| 2572233409 | t3m_01766 | Scaffold       | t3m_contig_70_1156_len_8766_read_count_661841.59                          |           |
| 2572233409 | t3m_01766 | Coordinates    | 4191..6215(+)                                                             |           |
| 2572233409 | t3m_01766 | DNA_length     | 2025bp                                                                    |           |
| 2572233409 | t3m_01766 | Protein_length | 674aa                                                                     |           |
| 2572233409 | t3m_01766 | GC             |                                                                           | 0.69      |
| 2572233410 | t3m_01767 | COG_category   | [L] Replication, recombination and repair                                 |           |
| 2572233410 | t3m_01767 | COG1697        | DNA topoisomerase VI, subunit A                                           | 5.00E-101 |
| 2572233410 | t3m_01767 | pfam04406      | TP6A_N                                                                    | 2.20E-14  |
| 2572233410 | t3m_01767 | EC:5.99.1.3    | DNA topoisomerase (ATP-hydrolyzing).                                      |           |
| 2572233410 | t3m_01767 | KO:K03166      | DNA topoisomerase VI subunit A [EC:5.99.1.3]                              | 0.00E+00  |
| 2572233410 | t3m_01767 | Locus_type     | CDS                                                                       |           |
| 2572233410 | t3m_01767 | Product_name   | DNA topoisomerase VI, subunit A                                           |           |
| 2572233410 | t3m_01767 | Scaffold       | t3m_contig_70_1156_len_8766_read_count_661841.59                          |           |
| 2572233410 | t3m_01767 | Coordinates    | 6175..7317(+)                                                             |           |
| 2572233410 | t3m_01767 | DNA_length     | 1143bp                                                                    |           |
| 2572233410 | t3m_01767 | Protein_length | 380aa                                                                     |           |
| 2572233410 | t3m_01767 | GC             |                                                                           | 0.65      |
| 2572233411 | t3m_01768 | COG_category   | [G] Carbohydrate transport and metabolism                                 |           |
| 2572233411 | t3m_01768 | COG0580        | Glycerol uptake facilitator and related permeases (Major Intrinsic Protei | 1.00E-34  |
| 2572233411 | t3m_01768 | pfam00230      | MIP                                                                       | 4.50E-46  |
| 2572233411 | t3m_01768 | TIGR00861      | MIP family channel proteins                                               | 1.50E-50  |
| 2572233411 | t3m_01768 | KO:K06188      | aquaporin Z                                                               | 9.80E-45  |
| 2572233411 | t3m_01768 | Locus_type     | CDS                                                                       |           |
| 2572233411 | t3m_01768 | Product_name   | Glycerol uptake facilitator and related permeases (Major Intrinsic Protei |           |
| 2572233411 | t3m_01768 | Scaffold       | t3m_contig_70_1156_len_8766_read_count_661841.59                          |           |
| 2572233411 | t3m_01768 | Coordinates    | 7384..8118(+)                                                             |           |
| 2572233411 | t3m_01768 | DNA_length     | 735bp                                                                     |           |
| 2572233411 | t3m_01768 | Protein_length | 244aa                                                                     |           |
| 2572233411 | t3m_01768 | GC             |                                                                           | 0.67      |

|            |           |                |                                                                         |          |
|------------|-----------|----------------|-------------------------------------------------------------------------|----------|
| 2572233411 | t3m_01768 | Transmembrane  | Yes                                                                     |          |
| 2572233412 | t3m_01769 | Locus_type     | CDS                                                                     |          |
| 2572233412 | t3m_01769 | Product_name   | hypothetical protein                                                    |          |
| 2572233412 | t3m_01769 | Scaffold       | t3m_contig_70_1156_len_8766_read_count_661841.59                        |          |
| 2572233412 | t3m_01769 | Coordinates    | 8136..8552(-)                                                           |          |
| 2572233412 | t3m_01769 | DNA_length     | 417bp                                                                   |          |
| 2572233412 | t3m_01769 | Protein_length | 138aa                                                                   |          |
| 2572233412 | t3m_01769 | GC             |                                                                         | 0.7      |
| 2572233413 | t3m_01770 | COG_category   | [R] General function prediction only                                    |          |
| 2572233413 | t3m_01770 | COG1011        | Predicted hydrolase (HAD superfamily)                                   | 1.00E-26 |
| 2572233413 | t3m_01770 | pfam13419      | HAD_2                                                                   | 2.70E-28 |
| 2572233413 | t3m_01770 | TIGR01549      | haloacid dehalogenase superfamily, subfamily IA, variant 1 with third m | 3.00E-10 |
| 2572233413 | t3m_01770 | TIGR01509      | haloacid dehalogenase superfamily, subfamily IA, variant 3 with third m | 1.30E-11 |
| 2572233413 | t3m_01770 | KO:K07025      | putative hydrolase of the HAD superfamily                               | 7.50E-27 |
| 2572233413 | t3m_01770 | Locus_type     | CDS                                                                     |          |
| 2572233413 | t3m_01770 | Product_name   | haloacid dehalogenase superfamily, subfamily IA, variant 3 with third m |          |
| 2572233413 | t3m_01770 | Scaffold       | t3m_contig_70_1173_len_8710_read_count_677408.60                        |          |
| 2572233413 | t3m_01770 | Coordinates    | 163..894(-)                                                             |          |
| 2572233413 | t3m_01770 | DNA_length     | 732bp                                                                   |          |
| 2572233413 | t3m_01770 | Protein_length | 243aa                                                                   |          |
| 2572233413 | t3m_01770 | GC             |                                                                         | 0.69     |
| 2572233414 | t3m_01771 | COG_category   | [K] Transcription                                                       |          |
| 2572233414 | t3m_01771 | COG0195        | Transcription elongation factor                                         | 2.00E-15 |
| 2572233414 | t3m_01771 | TIGR01952      | NusA family KH domain protein, archaeal                                 | 3.10E-36 |
| 2572233414 | t3m_01771 | KO:K02600      | N utilization substance protein A                                       | 7.10E-23 |
| 2572233414 | t3m_01771 | Locus_type     | CDS                                                                     |          |
| 2572233414 | t3m_01771 | Product_name   | NusA family KH domain protein, archaeal                                 |          |
| 2572233414 | t3m_01771 | Scaffold       | t3m_contig_70_1173_len_8710_read_count_677408.60                        |          |
| 2572233414 | t3m_01771 | Coordinates    | 977..1402(-)                                                            |          |
| 2572233414 | t3m_01771 | DNA_length     | 426bp                                                                   |          |
| 2572233414 | t3m_01771 | Protein_length | 141aa                                                                   |          |

|            |           |                |                                                           |          |
|------------|-----------|----------------|-----------------------------------------------------------|----------|
| 2572233414 | t3m_01771 | GC             |                                                           | 0.64     |
| 2572233415 | t3m_01772 | KEGG_module    | M00179: Ribosome, archaea                                 |          |
| 2572233415 | t3m_01772 | KEGG_module    | M00177: Ribosome, eukaryotes                              |          |
| 2572233415 | t3m_01772 | COG_category   | [J] Translation, ribosomal structure and biogenesis       |          |
| 2572233415 | t3m_01772 | COG1911        | Ribosomal protein L30E                                    | 4.00E-19 |
| 2572233415 | t3m_01772 | pfam01248      | Ribosomal_L7Ae                                            | 1.10E-14 |
| 2572233415 | t3m_01772 | KO:K02908      | large subunit ribosomal protein L30e                      | 8.70E-17 |
| 2572233415 | t3m_01772 | ITERM:00256    | LSU ribosomal protein L30E                                |          |
| 2572233415 | t3m_01772 | Locus_type     | CDS                                                       |          |
| 2572233415 | t3m_01772 | Product_name   | LSU ribosomal protein L30E                                |          |
| 2572233415 | t3m_01772 | Scaffold       | t3m_contig_70_1173_len_8710_read_count_677408.60          |          |
| 2572233415 | t3m_01772 | Coordinates    | 1421..1708(-)                                             |          |
| 2572233415 | t3m_01772 | DNA_length     | 288bp                                                     |          |
| 2572233415 | t3m_01772 | Protein_length | 95aa                                                      |          |
| 2572233415 | t3m_01772 | GC             |                                                           | 0.69     |
| 2572233416 | t3m_01773 | KEGG_module    | M00184: RNA polymerase, archaea                           |          |
| 2572233416 | t3m_01773 | pfam04998      | RNA_pol_Rpb1_5                                            | 1.00E-49 |
| 2572233416 | t3m_01773 | EC:2.7.7.6     | DNA-directed RNA polymerase.                              |          |
| 2572233416 | t3m_01773 | TIGR02389      | DNA-directed RNA polymerase, subunit A''                  | 0.00E+00 |
| 2572233416 | t3m_01773 | KO:K03042      | DNA-directed RNA polymerase subunit A'' [EC:2.7.7.6]      | 0.00E+00 |
| 2572233416 | t3m_01773 | Locus_type     | CDS                                                       |          |
| 2572233416 | t3m_01773 | Product_name   | DNA-directed RNA polymerase, subunit A''                  |          |
| 2572233416 | t3m_01773 | Scaffold       | t3m_contig_70_1173_len_8710_read_count_677408.60          |          |
| 2572233416 | t3m_01773 | Coordinates    | 1714..3021(-)                                             |          |
| 2572233416 | t3m_01773 | DNA_length     | 1308bp                                                    |          |
| 2572233416 | t3m_01773 | Protein_length | 435aa                                                     |          |
| 2572233416 | t3m_01773 | GC             |                                                           | 0.69     |
| 2572233417 | t3m_01774 | KEGG_module    | M00184: RNA polymerase, archaea                           |          |
| 2572233417 | t3m_01774 | COG_category   | [K] Transcription                                         |          |
| 2572233417 | t3m_01774 | COG0086        | DNA-directed RNA polymerase, beta' subunit/160 kD subunit | 0.00E+00 |
| 2572233417 | t3m_01774 | pfam04983      | RNA_pol_Rpb1_3                                            | 1.70E-28 |

|            |           |                |                                                                      |           |
|------------|-----------|----------------|----------------------------------------------------------------------|-----------|
| 2572233417 | t3m_01774 | pfam00623      | RNA_pol_Rpb1_2                                                       | 4.80E-58  |
| 2572233417 | t3m_01774 | pfam04997      | RNA_pol_Rpb1_1                                                       | 5.80E-28  |
| 2572233417 | t3m_01774 | pfam04997      | RNA_pol_Rpb1_1                                                       | 6.70E-54  |
| 2572233417 | t3m_01774 | pfam05000      | RNA_pol_Rpb1_4                                                       | 1.70E-27  |
| 2572233417 | t3m_01774 | pfam04998      | RNA_pol_Rpb1_5                                                       | 2.60E-29  |
| 2572233417 | t3m_01774 | EC:2.7.7.6     | DNA-directed RNA polymerase.                                         |           |
| 2572233417 | t3m_01774 | TIGR02390      | DNA-directed RNA polymerase subunit A'                               | 0.00E+00  |
| 2572233417 | t3m_01774 | KO:K03041      | DNA-directed RNA polymerase subunit A' [EC:2.7.7.6]                  | 0.00E+00  |
| 2572233417 | t3m_01774 | Locus_type     | CDS                                                                  |           |
| 2572233417 | t3m_01774 | Product_name   | DNA-directed RNA polymerase, subunit A' (EC 2.7.7.6)                 |           |
| 2572233417 | t3m_01774 | Scaffold       | t3m_contig_70_1173_len_8710_read_count_677408.60                     |           |
| 2572233417 | t3m_01774 | Coordinates    | 3018..5816(-)                                                        |           |
| 2572233417 | t3m_01774 | DNA_length     | 2799bp                                                               |           |
| 2572233417 | t3m_01774 | Protein_length | 932aa                                                                |           |
| 2572233417 | t3m_01774 | GC             |                                                                      | 0.68      |
| 2572233418 | t3m_01775 | KEGG_module    | M00184: RNA polymerase, archaea                                      |           |
| 2572233418 | t3m_01775 | COG_category   | [K] Transcription                                                    |           |
| 2572233418 | t3m_01775 | COG0085        | DNA-directed RNA polymerase, beta subunit/140 kD subunit             | 0.00E+00  |
| 2572233418 | t3m_01775 | pfam04563      | RNA_pol_Rpb2_1                                                       | 2.10E-06  |
| 2572233418 | t3m_01775 | pfam04566      | RNA_pol_Rpb2_4                                                       | 1.40E-18  |
| 2572233418 | t3m_01775 | pfam04560      | RNA_pol_Rpb2_7                                                       | 9.30E-24  |
| 2572233418 | t3m_01775 | pfam04565      | RNA_pol_Rpb2_3                                                       | 1.50E-25  |
| 2572233418 | t3m_01775 | pfam00562      | RNA_pol_Rpb2_6                                                       | 2.30E-118 |
| 2572233418 | t3m_01775 | pfam04561      | RNA_pol_Rpb2_2                                                       | 6.40E-17  |
| 2572233418 | t3m_01775 | pfam04567      | RNA_pol_Rpb2_5                                                       | 1.30E-11  |
| 2572233418 | t3m_01775 | EC:2.7.7.6     | DNA-directed RNA polymerase.                                         |           |
| 2572233418 | t3m_01775 | TIGR03670      | DNA-directed RNA polymerase subunit B                                | 0.00E+00  |
| 2572233418 | t3m_01775 | KO:K13798      | DNA-directed RNA polymerase subunit B [EC:2.7.7.6]                   | 0.00E+00  |
| 2572233418 | t3m_01775 | Locus_type     | CDS                                                                  |           |
| 2572233418 | t3m_01775 | Product_name   | DNA-directed RNA polymerase, subunit B" (EC 2.7.7.6)/DNA-directed RN |           |
| 2572233418 | t3m_01775 | Scaffold       | t3m_contig_70_1173_len_8710_read_count_677408.60                     |           |
| 2572233418 | t3m_01775 | Coordinates    | 5827..8709(-)                                                        |           |
| 2572233418 | t3m_01775 | DNA_length     | 2883bp                                                               |           |



|            |           |                |                                                                        |      |
|------------|-----------|----------------|------------------------------------------------------------------------|------|
| 2572233418 | t3m_01775 | Protein_length | 960aa                                                                  |      |
| 2572233418 | t3m_01775 | GC             |                                                                        | 0.68 |
| 2572233419 | t3m_01776 | Locus_type     | CDS                                                                    |      |
| 2572233419 | t3m_01776 | Product_name   | hypothetical protein                                                   |      |
| 2572233419 | t3m_01776 | Scaffold       | t3m_contig_70_1259_len_8374_read_count_746448.61                       |      |
| 2572233419 | t3m_01776 | Coordinates    | 92..394(-)                                                             |      |
| 2572233419 | t3m_01776 | DNA_length     | 303bp                                                                  |      |
| 2572233419 | t3m_01776 | Protein_length | 100aa                                                                  |      |
| 2572233419 | t3m_01776 | GC             |                                                                        | 0.66 |
| 2572233419 | t3m_01776 | Transmembrane  | Yes                                                                    |      |
| 2572233420 | t3m_01777 | Locus_type     | CDS                                                                    |      |
| 2572233420 | t3m_01777 | Product_name   | hypothetical protein                                                   |      |
| 2572233420 | t3m_01777 | Scaffold       | t3m_contig_70_1259_len_8374_read_count_746448.61                       |      |
| 2572233420 | t3m_01777 | Coordinates    | 439..1056(-)                                                           |      |
| 2572233420 | t3m_01777 | DNA_length     | 618bp                                                                  |      |
| 2572233420 | t3m_01777 | Protein_length | 205aa                                                                  |      |
| 2572233420 | t3m_01777 | GC             |                                                                        | 0.66 |
| 2572233420 | t3m_01777 | Transmembrane  | Yes                                                                    |      |
| 2572233421 | t3m_01778 | KEGG_module    | M00117: Ubiquinone biosynthesis, prokaryotes, chorismate => ubiquinone |      |
| 2572233421 | t3m_01778 | Metacyc        | PWY-6559: spermidine biosynthesis II                                   |      |
| 2572233421 | t3m_01778 | Metacyc        | PWY-5872: ubiquinol-10 biosynthesis (eukaryotic)                       |      |
| 2572233421 | t3m_01778 | Metacyc        | PWY-5873: ubiquinol-7 biosynthesis (eukaryotic)                        |      |
| 2572233421 | t3m_01778 | Metacyc        | PWY-5856: ubiquinol-9 biosynthesis (prokaryotic)                       |      |
| 2572233421 | t3m_01778 | Metacyc        | PWY-5855: ubiquinol-7 biosynthesis (prokaryotic)                       |      |
| 2572233421 | t3m_01778 | Metacyc        | PWY-181: photorespiration                                              |      |
| 2572233421 | t3m_01778 | Metacyc        | PWY-5857: ubiquinol-10 biosynthesis (prokaryotic)                      |      |
| 2572233421 | t3m_01778 | Metacyc        | PWY-5871: ubiquinol-9 biosynthesis (eukaryotic)                        |      |
| 2572233421 | t3m_01778 | Metacyc        | PWY-7007: methyl ketone biosynthesis                                   |      |
| 2572233421 | t3m_01778 | Metacyc        | PWY-5113: UDP-D-apiiose biosynthesis (from UDP-D-glucuronate)          |      |
| 2572233421 | t3m_01778 | Metacyc        | PWY-6585: 2-tridecanone biosynthesis                                   |      |
| 2572233421 | t3m_01778 | Metacyc        | PWY-5870: ubiquinol-8 biosynthesis (eukaryotic)                        |      |

|            |           |                |                                                                    |           |
|------------|-----------|----------------|--------------------------------------------------------------------|-----------|
| 2572233421 | t3m_01778 | Metacyc        | PWY-5163: <l>p</l>-cumate degradation to 2-oxopent-4-enoate        |           |
| 2572233421 | t3m_01778 | Metacyc        | PWY-5826: hypoglycin biosynthesis                                  |           |
| 2572233421 | t3m_01778 | Metacyc        | PWY-6627: salinosporamide A biosynthesis                           |           |
| 2572233421 | t3m_01778 | Metacyc        | PWY-3385: choline biosynthesis I                                   |           |
| 2572233421 | t3m_01778 | Metacyc        | PWY30-19: ubiquinol-6 biosynthesis (eukaryotic)                    |           |
| 2572233421 | t3m_01778 | Metacyc        | PWY-6708: ubiquinol-8 biosynthesis (prokaryotic)                   |           |
| 2572233421 | t3m_01778 | COG_category   | [H] Coenzyme transport and metabolism                              |           |
| 2572233421 | t3m_01778 | COG0163        | 3-polyprenyl-4-hydroxybenzoate decarboxylase                       | 1.00E-57  |
| 2572233421 | t3m_01778 | pfam02441      | Flavoprotein                                                       | 2.50E-30  |
| 2572233421 | t3m_01778 | EC:4.1.1.-     | Lyases. Carbon-carbon lyases. Carboxy-lyases.                      |           |
| 2572233421 | t3m_01778 | TIGR00421      | polyprenyl P-hydroxybenzoate and phenylacrylic acid decarboxylases | 4.60E-63  |
| 2572233421 | t3m_01778 | KO:K03186      | 3-octaprenyl-4-hydroxybenzoate carboxy-lyase UbiX [EC:4.1.1.-]     | 0.00E+00  |
| 2572233421 | t3m_01778 | Locus_type     | CDS                                                                |           |
| 2572233421 | t3m_01778 | Product_name   | polyprenyl P-hydroxybenzoate and phenylacrylic acid decarboxylases |           |
| 2572233421 | t3m_01778 | Scaffold       | t3m_contig_70_1259_len_8374_read_count_746448.61                   |           |
| 2572233421 | t3m_01778 | Coordinates    | 1053..1628(-)                                                      |           |
| 2572233421 | t3m_01778 | DNA_length     | 576bp                                                              |           |
| 2572233421 | t3m_01778 | Protein_length | 191aa                                                              |           |
| 2572233421 | t3m_01778 | GC             |                                                                    | 0.69      |
| 2572233422 | t3m_01779 | COG_category   | [R] General function prediction only                               |           |
| 2572233422 | t3m_01779 | COG3975        | Predicted protease with the C-terminal PDZ domain                  | 1.00E-111 |
| 2572233422 | t3m_01779 | pfam13180      | PDZ_2                                                              | 7.80E-09  |
| 2572233422 | t3m_01779 | pfam05299      | Peptidase_M61                                                      | 7.40E-37  |
| 2572233422 | t3m_01779 | Locus_type     | CDS                                                                |           |
| 2572233422 | t3m_01779 | Product_name   | Predicted protease with the C-terminal PDZ domain                  |           |
| 2572233422 | t3m_01779 | Scaffold       | t3m_contig_70_1259_len_8374_read_count_746448.61                   |           |
| 2572233422 | t3m_01779 | Coordinates    | 1802..3571(-)                                                      |           |
| 2572233422 | t3m_01779 | DNA_length     | 1770bp                                                             |           |
| 2572233422 | t3m_01779 | Protein_length | 589aa                                                              |           |
| 2572233422 | t3m_01779 | GC             |                                                                    | 0.66      |
| 2572233423 | t3m_01780 | Locus_type     | CDS                                                                |           |
| 2572233423 | t3m_01780 | Product_name   | hypothetical protein                                               |           |

|            |           |                |                                                             |           |
|------------|-----------|----------------|-------------------------------------------------------------|-----------|
| 2572233423 | t3m_01780 | Scaffold       | t3m_contig_70_1259_len_8374_read_count_746448.61            |           |
| 2572233423 | t3m_01780 | Coordinates    | 3570..3842(+)                                               |           |
| 2572233423 | t3m_01780 | DNA_length     | 273bp                                                       |           |
| 2572233423 | t3m_01780 | Protein_length | 90aa                                                        |           |
| 2572233423 | t3m_01780 | GC             |                                                             | 0.66      |
| 2572233424 | t3m_01781 | KEGG_module    | M00248: Putative antibiotic transport system                |           |
| 2572233424 | t3m_01781 | COG_category   | [V] Defense mechanisms                                      |           |
| 2572233424 | t3m_01781 | COG1131        | ABC-type multidrug transport system, ATPase component       | 3.00E-81  |
| 2572233424 | t3m_01781 | pfam00005      | ABC_tran                                                    | 8.10E-32  |
| 2572233424 | t3m_01781 | TIGR01188      | daunorubicin resistance ABC transporter ATP-binding subunit | 2.60E-108 |
| 2572233424 | t3m_01781 | KO:K09687      | antibiotic transport system ATP-binding protein             | 0.00E+00  |
| 2572233424 | t3m_01781 | Locus_type     | CDS                                                         |           |
| 2572233424 | t3m_01781 | Product_name   | daunorubicin resistance ABC transporter ATP-binding subunit |           |
| 2572233424 | t3m_01781 | Scaffold       | t3m_contig_70_1259_len_8374_read_count_746448.61            |           |
| 2572233424 | t3m_01781 | Coordinates    | 4058..5071(+)                                               |           |
| 2572233424 | t3m_01781 | DNA_length     | 1014bp                                                      |           |
| 2572233424 | t3m_01781 | Protein_length | 337aa                                                       |           |
| 2572233424 | t3m_01781 | GC             |                                                             | 0.68      |
| 2572233425 | t3m_01782 | KEGG_module    | M00248: Putative antibiotic transport system                |           |
| 2572233425 | t3m_01782 | COG_category   | [V] Defense mechanisms                                      |           |
| 2572233425 | t3m_01782 | COG0842        | ABC-type multidrug transport system, permease component     | 3.00E-04  |
| 2572233425 | t3m_01782 | pfam01061      | ABC2_membrane                                               | 2.70E-22  |
| 2572233425 | t3m_01782 | KO:K09686      | antibiotic transport system permease protein                | 4.20E-35  |
| 2572233425 | t3m_01782 | Locus_type     | CDS                                                         |           |
| 2572233425 | t3m_01782 | Product_name   | ABC-type multidrug transport system, permease component     |           |
| 2572233425 | t3m_01782 | Scaffold       | t3m_contig_70_1259_len_8374_read_count_746448.61            |           |
| 2572233425 | t3m_01782 | Coordinates    | 5068..5916(+)                                               |           |
| 2572233425 | t3m_01782 | DNA_length     | 849bp                                                       |           |
| 2572233425 | t3m_01782 | Protein_length | 282aa                                                       |           |
| 2572233425 | t3m_01782 | GC             |                                                             | 0.65      |
| 2572233425 | t3m_01782 | Transmembrane  | Yes                                                         |           |

|            |           |                |                                                                  |           |
|------------|-----------|----------------|------------------------------------------------------------------|-----------|
| 2572233426 | t3m_01783 | Locus_type     | CDS                                                              |           |
| 2572233426 | t3m_01783 | Product_name   | hypothetical protein                                             |           |
| 2572233426 | t3m_01783 | Scaffold       | t3m_contig_70_1259_len_8374_read_count_746448.61                 |           |
| 2572233426 | t3m_01783 | Coordinates    | 5921..6469(-)                                                    |           |
| 2572233426 | t3m_01783 | DNA_length     | 549bp                                                            |           |
| 2572233426 | t3m_01783 | Protein_length | 182aa                                                            |           |
| 2572233426 | t3m_01783 | GC             |                                                                  | 0.7       |
| 2572233427 | t3m_01784 | COG_category   | [R] General function prediction only                             |           |
| 2572233427 | t3m_01784 | COG1964        | Predicted Fe-S oxidoreductases                                   | 1.00E-130 |
| 2572233427 | t3m_01784 | pfam04055      | Radical_SAM                                                      | 2.50E-15  |
| 2572233427 | t3m_01784 | pfam13394      | Fer4_14                                                          | 5.20E-06  |
| 2572233427 | t3m_01784 | Locus_type     | CDS                                                              |           |
| 2572233427 | t3m_01784 | Product_name   | Predicted Fe-S oxidoreductases                                   |           |
| 2572233427 | t3m_01784 | Scaffold       | t3m_contig_70_1259_len_8374_read_count_746448.61                 |           |
| 2572233427 | t3m_01784 | Coordinates    | 6713..8371(+)                                                    |           |
| 2572233427 | t3m_01784 | DNA_length     | 1659bp                                                           |           |
| 2572233427 | t3m_01784 | Protein_length | 553aa                                                            |           |
| 2572233427 | t3m_01784 | GC             |                                                                  | 0.64      |
| 2572233428 | t3m_01785 | COG_category   | [R] General function prediction only                             |           |
| 2572233428 | t3m_01785 | COG2018        | Uncharacterized distant relative of homeotic protein bithoraxoid | 5.00E-11  |
| 2572233428 | t3m_01785 | pfam03259      | Robl_LC7                                                         | 4.50E-10  |
| 2572233428 | t3m_01785 | Locus_type     | CDS                                                              |           |
| 2572233428 | t3m_01785 | Product_name   | Uncharacterized distant relative of homeotic protein bithoraxoid |           |
| 2572233428 | t3m_01785 | Scaffold       | t3m_contig_70_1281_len_8301_read_count_711995.62                 |           |
| 2572233428 | t3m_01785 | Coordinates    | 131..487(+)                                                      |           |
| 2572233428 | t3m_01785 | DNA_length     | 357bp                                                            |           |
| 2572233428 | t3m_01785 | Protein_length | 118aa                                                            |           |
| 2572233428 | t3m_01785 | GC             |                                                                  | 0.66      |
| 2572233429 | t3m_01786 | pfam13641      | Glyco_tranf_2_3                                                  | 7.50E-24  |
| 2572233429 | t3m_01786 | Locus_type     | CDS                                                              |           |
| 2572233429 | t3m_01786 | Product_name   | Glycosyltransferase like family 2                                |           |

|            |           |                |                                                     |          |
|------------|-----------|----------------|-----------------------------------------------------|----------|
| 2572233429 | t3m_01786 | Scaffold       | t3m_contig_70_1281_len_8301_read_count_711995.62    |          |
| 2572233429 | t3m_01786 | Coordinates    | 566..1417(-)                                        |          |
| 2572233429 | t3m_01786 | DNA_length     | 852bp                                               |          |
| 2572233429 | t3m_01786 | Protein_length | 283aa                                               |          |
| 2572233429 | t3m_01786 | GC             |                                                     | 0.68     |
| 2572233430 | t3m_01787 | COG_category   | [S] Function unknown                                |          |
| 2572233430 | t3m_01787 | COG1873        | Uncharacterized conserved protein                   | 2.00E-06 |
| 2572233430 | t3m_01787 | pfam05239      | PRC                                                 | 6.70E-11 |
| 2572233430 | t3m_01787 | Locus_type     | CDS                                                 |          |
| 2572233430 | t3m_01787 | Product_name   | Uncharacterized conserved protein                   |          |
| 2572233430 | t3m_01787 | Scaffold       | t3m_contig_70_1281_len_8301_read_count_711995.62    |          |
| 2572233430 | t3m_01787 | Coordinates    | 1407..1649(-)                                       |          |
| 2572233430 | t3m_01787 | DNA_length     | 243bp                                               |          |
| 2572233430 | t3m_01787 | Protein_length | 80aa                                                |          |
| 2572233430 | t3m_01787 | GC             |                                                     | 0.61     |
| 2572233431 | t3m_01788 | KEGG_module    | M00177: Ribosome, eukaryotes                        |          |
| 2572233431 | t3m_01788 | KEGG_module    | M00179: Ribosome, archaea                           |          |
| 2572233431 | t3m_01788 | COG_category   | [J] Translation, ribosomal structure and biogenesis |          |
| 2572233431 | t3m_01788 | COG1727        | Ribosomal protein L18E                              | 3.00E-27 |
| 2572233431 | t3m_01788 | pfam00828      | Ribosomal_L18e                                      | 2.80E-14 |
| 2572233431 | t3m_01788 | KO:K02883      | large subunit ribosomal protein L18e                | 2.50E-24 |
| 2572233431 | t3m_01788 | Locus_type     | CDS                                                 |          |
| 2572233431 | t3m_01788 | Product_name   | Ribosomal protein L18E                              |          |
| 2572233431 | t3m_01788 | Scaffold       | t3m_contig_70_1281_len_8301_read_count_711995.62    |          |
| 2572233431 | t3m_01788 | Coordinates    | 1816..2181(+)                                       |          |
| 2572233431 | t3m_01788 | DNA_length     | 366bp                                               |          |
| 2572233431 | t3m_01788 | Protein_length | 121aa                                               |          |
| 2572233431 | t3m_01788 | GC             |                                                     | 0.66     |
| 2572233432 | t3m_01789 | KEGG_module    | M00178: Ribosome, bacteria                          |          |
| 2572233432 | t3m_01789 | KEGG_module    | M00179: Ribosome, archaea                           |          |
| 2572233432 | t3m_01789 | COG_category   | [J] Translation, ribosomal structure and biogenesis |          |

|            |           |                |                                                     |          |
|------------|-----------|----------------|-----------------------------------------------------|----------|
| 2572233432 | t3m_01789 | COG0102        | Ribosomal protein L13                               | 5.00E-21 |
| 2572233432 | t3m_01789 | pfam00572      | Ribosomal_L13                                       | 2.60E-20 |
| 2572233432 | t3m_01789 | TIGR01077      | ribosomal protein L13, archaeal/eukaryotic          | 3.30E-45 |
| 2572233432 | t3m_01789 | KO:K02871      | large subunit ribosomal protein L13                 | 7.80E-33 |
| 2572233432 | t3m_01789 | ITERM:00230    | LSU ribosomal protein L13P                          |          |
| 2572233432 | t3m_01789 | Locus_type     | CDS                                                 |          |
| 2572233432 | t3m_01789 | Product_name   | LSU ribosomal protein L13P                          |          |
| 2572233432 | t3m_01789 | Scaffold       | t3m_contig_70_1281_len_8301_read_count_711995.62    |          |
| 2572233432 | t3m_01789 | Coordinates    | 2174..2614(+)                                       |          |
| 2572233432 | t3m_01789 | DNA_length     | 441bp                                               |          |
| 2572233432 | t3m_01789 | Protein_length | 146aa                                               |          |
| 2572233432 | t3m_01789 | GC             |                                                     | 0.72     |
| 2572233433 | t3m_01790 | KEGG_module    | M00179: Ribosome, archaea                           |          |
| 2572233433 | t3m_01790 | KEGG_module    | M00178: Ribosome, bacteria                          |          |
| 2572233433 | t3m_01790 | COG_category   | [J] Translation, ribosomal structure and biogenesis |          |
| 2572233433 | t3m_01790 | COG0103        | Ribosomal protein S9                                | 1.00E-30 |
| 2572233433 | t3m_01790 | pfam00380      | Ribosomal_S9                                        | 4.80E-34 |
| 2572233433 | t3m_01790 | TIGR03627      | archaeal ribosomal protein S9P                      | 2.90E-60 |
| 2572233433 | t3m_01790 | KO:K02996      | small subunit ribosomal protein S9                  | 2.10E-40 |
| 2572233433 | t3m_01790 | Locus_type     | CDS                                                 |          |
| 2572233433 | t3m_01790 | Product_name   | SSU ribosomal protein S9P                           |          |
| 2572233433 | t3m_01790 | Scaffold       | t3m_contig_70_1281_len_8301_read_count_711995.62    |          |
| 2572233433 | t3m_01790 | Coordinates    | 2611..3018(+)                                       |          |
| 2572233433 | t3m_01790 | DNA_length     | 408bp                                               |          |
| 2572233433 | t3m_01790 | Protein_length | 135aa                                               |          |
| 2572233433 | t3m_01790 | GC             |                                                     | 0.7      |
| 2572233434 | t3m_01791 | KEGG_module    | M00184: RNA polymerase, archaea                     |          |
| 2572233434 | t3m_01791 | COG_category   | [K] Transcription                                   |          |
| 2572233434 | t3m_01791 | COG1644        | DNA-directed RNA polymerase, subunit N (RpoN/RPB10) | 3.00E-22 |
| 2572233434 | t3m_01791 | pfam01194      | RNA_pol_N                                           | 3.30E-30 |
| 2572233434 | t3m_01791 | EC:2.7.7.6     | DNA-directed RNA polymerase.                        |          |
| 2572233434 | t3m_01791 | KO:K03058      | DNA-directed RNA polymerase subunit N [EC:2.7.7.6]  | 3.70E-19 |

|            |           |                |                                                                   |           |
|------------|-----------|----------------|-------------------------------------------------------------------|-----------|
| 2572233434 | t3m_01791 | ITERM:01913    | DNA-directed RNA polymerase, subunit N (EC 2.7.7.6)               |           |
| 2572233434 | t3m_01791 | Locus_type     | CDS                                                               |           |
| 2572233434 | t3m_01791 | Product_name   | DNA-directed RNA polymerase, subunit N (EC 2.7.7.6)               |           |
| 2572233434 | t3m_01791 | Scaffold       | t3m_contig_70_1281_len_8301_read_count_711995.62                  |           |
| 2572233434 | t3m_01791 | Coordinates    | 3038..3235(+)                                                     |           |
| 2572233434 | t3m_01791 | DNA_length     | 198bp                                                             |           |
| 2572233434 | t3m_01791 | Protein_length | 65aa                                                              |           |
| 2572233434 | t3m_01791 | GC             |                                                                   | 0.7       |
| 2572233435 | t3m_01792 | Locus_type     | CDS                                                               |           |
| 2572233435 | t3m_01792 | Product_name   | hypothetical protein                                              |           |
| 2572233435 | t3m_01792 | Scaffold       | t3m_contig_70_1281_len_8301_read_count_711995.62                  |           |
| 2572233435 | t3m_01792 | Coordinates    | 3380..6760(-)                                                     |           |
| 2572233435 | t3m_01792 | DNA_length     | 3381bp                                                            |           |
| 2572233435 | t3m_01792 | Protein_length | 1126aa                                                            |           |
| 2572233435 | t3m_01792 | GC             |                                                                   | 0.65      |
| 2572233435 | t3m_01792 | Signal_peptide | Yes                                                               |           |
| 2572233435 | t3m_01792 | Transmembrane  | Yes                                                               |           |
| 2572233436 | t3m_01793 | COG_category   | [O] Posttranslational modification, protein turnover, chaperones  |           |
| 2572233436 | t3m_01793 | COG0464        | ATPases of the AAA+ class                                         | 2.00E-114 |
| 2572233436 | t3m_01793 | pfam00004      | AAA                                                               | 6.10E-48  |
| 2572233436 | t3m_01793 | pfam00004      | AAA                                                               | 4.30E-25  |
| 2572233436 | t3m_01793 | Locus_type     | CDS                                                               |           |
| 2572233436 | t3m_01793 | Product_name   | ATPases of the AAA+ class                                         |           |
| 2572233436 | t3m_01793 | Scaffold       | t3m_contig_70_1281_len_8301_read_count_711995.62                  |           |
| 2572233436 | t3m_01793 | Coordinates    | 6875..8299(-)                                                     |           |
| 2572233436 | t3m_01793 | DNA_length     | 1425bp                                                            |           |
| 2572233436 | t3m_01793 | Protein_length | 474aa                                                             |           |
| 2572233436 | t3m_01793 | GC             |                                                                   | 0.68      |
| 2572233437 | t3m_01794 | KEGG_module    | M00335: Sec (secretion) system                                    |           |
| 2572233437 | t3m_01794 | COG_category   | [U] Intracellular trafficking, secretion, and vesicular transport |           |
| 2572233437 | t3m_01794 | COG0552        | Signal recognition particle GTPase                                | 1.00E-92  |

|            |           |                |                                                     |           |
|------------|-----------|----------------|-----------------------------------------------------|-----------|
| 2572233437 | t3m_01794 | pfam00448      | SRP54                                               | 3.50E-74  |
| 2572233437 | t3m_01794 | pfam02881      | SRP54_N                                             | 8.40E-10  |
| 2572233437 | t3m_01794 | TIGR00064      | signal recognition particle-docking protein FtsY    | 1.20E-101 |
| 2572233437 | t3m_01794 | KO:K03110      | fused signal recognition particle receptor          | 0.00E+00  |
| 2572233437 | t3m_01794 | ITERM:02712    | signal recognition particle-docking protein FtsY    |           |
| 2572233437 | t3m_01794 | Locus_type     | CDS                                                 |           |
| 2572233437 | t3m_01794 | Product_name   | signal recognition particle-docking protein FtsY    |           |
| 2572233437 | t3m_01794 | Scaffold       | t3m_contig_70_1517_len_7421_read_count_590785.63    |           |
| 2572233437 | t3m_01794 | Coordinates    | 91..1104(+)                                         |           |
| 2572233437 | t3m_01794 | DNA_length     | 1014bp                                              |           |
| 2572233437 | t3m_01794 | Protein_length | 337aa                                               |           |
| 2572233437 | t3m_01794 | GC             |                                                     | 0.68      |
| 2572233438 | t3m_01795 | COG_category   | [J] Translation, ribosomal structure and biogenesis |           |
| 2572233438 | t3m_01795 | COG0565        | rRNA methylase                                      | 1.00E-46  |
| 2572233438 | t3m_01795 | pfam00588      | SpoU_methylase                                      | 3.60E-29  |
| 2572233438 | t3m_01795 | TIGR00050      | RNA methyltransferase, TrmH family, group 1         | 2.30E-55  |
| 2572233438 | t3m_01795 | Locus_type     | CDS                                                 |           |
| 2572233438 | t3m_01795 | Product_name   | RNA methyltransferase, TrmH family, group 1         |           |
| 2572233438 | t3m_01795 | Scaffold       | t3m_contig_70_1517_len_7421_read_count_590785.63    |           |
| 2572233438 | t3m_01795 | Coordinates    | 1101..1844(+)                                       |           |
| 2572233438 | t3m_01795 | DNA_length     | 744bp                                               |           |
| 2572233438 | t3m_01795 | Protein_length | 247aa                                               |           |
| 2572233438 | t3m_01795 | GC             |                                                     | 0.69      |
| 2572233439 | t3m_01796 | Locus_type     | CDS                                                 |           |
| 2572233439 | t3m_01796 | Product_name   | hypothetical protein                                |           |
| 2572233439 | t3m_01796 | Scaffold       | t3m_contig_70_1517_len_7421_read_count_590785.63    |           |
| 2572233439 | t3m_01796 | Coordinates    | 1831..2247(+)                                       |           |
| 2572233439 | t3m_01796 | DNA_length     | 417bp                                               |           |
| 2572233439 | t3m_01796 | Protein_length | 138aa                                               |           |
| 2572233439 | t3m_01796 | GC             |                                                     | 0.7       |
| 2572233440 | t3m_01797 | KEGG_module    | M00179: Ribosome, archaea                           |           |



|            |           |                |                                                     |          |
|------------|-----------|----------------|-----------------------------------------------------|----------|
| 2572233440 | t3m_01797 | KEGG_module    | M00177: Ribosome, eukaryotes                        |          |
| 2572233440 | t3m_01797 | COG_category   | [J] Translation, ribosomal structure and biogenesis |          |
| 2572233440 | t3m_01797 | COG1632        | Ribosomal protein L15E                              | 2.00E-48 |
| 2572233440 | t3m_01797 | pfam00827      | Ribosomal_L15e                                      | 1.10E-72 |
| 2572233440 | t3m_01797 | KO:K02877      | large subunit ribosomal protein L15e                | 0.00E+00 |
| 2572233440 | t3m_01797 | ITERM:00233    | LSU ribosomal protein L15E                          |          |
| 2572233440 | t3m_01797 | Locus_type     | CDS                                                 |          |
| 2572233440 | t3m_01797 | Product_name   | LSU ribosomal protein L15E                          |          |
| 2572233440 | t3m_01797 | Scaffold       | t3m_contig_70_1517_len_7421_read_count_590785.63    |          |
| 2572233440 | t3m_01797 | Coordinates    | 2330..2920(+)                                       |          |
| 2572233440 | t3m_01797 | DNA_length     | 591bp                                               |          |
| 2572233440 | t3m_01797 | Protein_length | 196aa                                               |          |
| 2572233440 | t3m_01797 | GC             |                                                     | 0.69     |
|            |           |                |                                                     |          |
| 2572233441 | t3m_01798 | COG_category   | [L] Replication, recombination and repair           |          |
| 2572233441 | t3m_01798 | COG1658        | Small primase-like proteins (Toprim domain)         | 1.00E-12 |
| 2572233441 | t3m_01798 | pfam13662      | Toprim_4                                            | 1.60E-07 |
| 2572233441 | t3m_01798 | Locus_type     | CDS                                                 |          |
| 2572233441 | t3m_01798 | Product_name   | Small primase-like proteins (Toprim domain)         |          |
| 2572233441 | t3m_01798 | Scaffold       | t3m_contig_70_1517_len_7421_read_count_590785.63    |          |
| 2572233441 | t3m_01798 | Coordinates    | 2910..3440(-)                                       |          |
| 2572233441 | t3m_01798 | DNA_length     | 531bp                                               |          |
| 2572233441 | t3m_01798 | Protein_length | 176aa                                               |          |
| 2572233441 | t3m_01798 | GC             |                                                     | 0.72     |
|            |           |                |                                                     |          |
| 2572233442 | t3m_01799 | COG_category   | [S] Function unknown                                |          |
| 2572233442 | t3m_01799 | COG1711        | Uncharacterized protein conserved in archaea        | 9.00E-05 |
| 2572233442 | t3m_01799 | Locus_type     | CDS                                                 |          |
| 2572233442 | t3m_01799 | Product_name   | hypothetical protein                                |          |
| 2572233442 | t3m_01799 | Scaffold       | t3m_contig_70_1517_len_7421_read_count_590785.63    |          |
| 2572233442 | t3m_01799 | Coordinates    | 3506..4156(+)                                       |          |
| 2572233442 | t3m_01799 | DNA_length     | 651bp                                               |          |
| 2572233442 | t3m_01799 | Protein_length | 216aa                                               |          |
| 2572233442 | t3m_01799 | GC             |                                                     | 0.7      |

|            |           |                |                                                            |          |
|------------|-----------|----------------|------------------------------------------------------------|----------|
| 2572233443 | t3m_01800 | COG_category   | [S] Function unknown                                       |          |
| 2572233443 | t3m_01800 | COG1565        | Uncharacterized conserved protein                          | 8.00E-49 |
| 2572233443 | t3m_01800 | pfam02636      | Methyltransf_28                                            | 3.30E-39 |
| 2572233443 | t3m_01800 | Locus_type     | CDS                                                        |          |
| 2572233443 | t3m_01800 | Product_name   | Uncharacterized conserved protein                          |          |
| 2572233443 | t3m_01800 | Scaffold       | t3m_contig_70_1517_len_7421_read_count_590785.63           |          |
| 2572233443 | t3m_01800 | Coordinates    | 4149..5297(-)                                              |          |
| 2572233443 | t3m_01800 | DNA_length     | 1149bp                                                     |          |
| 2572233443 | t3m_01800 | Protein_length | 382aa                                                      |          |
| 2572233443 | t3m_01800 | GC             |                                                            | 0.72     |
| 2572233444 | t3m_01801 | COG_category   | [R] General function prediction only                       |          |
| 2572233444 | t3m_01801 | COG2047        | Uncharacterized protein (ATP-grasp superfamily)            | 4.00E-77 |
| 2572233444 | t3m_01801 | pfam09754      | PAC2                                                       | 1.20E-48 |
| 2572233444 | t3m_01801 | TIGR00162      | TIGR00162 family protein                                   | 1.80E-82 |
| 2572233444 | t3m_01801 | Locus_type     | CDS                                                        |          |
| 2572233444 | t3m_01801 | Product_name   | Uncharacterized protein (ATP-grasp superfamily)            |          |
| 2572233444 | t3m_01801 | Scaffold       | t3m_contig_70_1517_len_7421_read_count_590785.63           |          |
| 2572233444 | t3m_01801 | Coordinates    | 5309..6094(-)                                              |          |
| 2572233444 | t3m_01801 | DNA_length     | 786bp                                                      |          |
| 2572233444 | t3m_01801 | Protein_length | 261aa                                                      |          |
| 2572233444 | t3m_01801 | GC             |                                                            | 0.67     |
| 2572233445 | t3m_01802 | COG_category   | [T] Signal transduction mechanisms                         |          |
| 2572233445 | t3m_01802 | COG0467        | RecA-superfamily ATPases implicated in signal transduction | 8.00E-12 |
| 2572233445 | t3m_01802 | pfam06745      | KaiC                                                       | 1.40E-10 |
| 2572233445 | t3m_01802 | Locus_type     | CDS                                                        |          |
| 2572233445 | t3m_01802 | Product_name   | RecA-superfamily ATPases implicated in signal transduction |          |
| 2572233445 | t3m_01802 | Scaffold       | t3m_contig_70_1517_len_7421_read_count_590785.63           |          |
| 2572233445 | t3m_01802 | Coordinates    | 6162..6926(-)                                              |          |
| 2572233445 | t3m_01802 | DNA_length     | 765bp                                                      |          |
| 2572233445 | t3m_01802 | Protein_length | 254aa                                                      |          |
| 2572233445 | t3m_01802 | GC             |                                                            | 0.68     |

|            |           |                |                                |                                                  |          |
|------------|-----------|----------------|--------------------------------|--------------------------------------------------|----------|
| 2572233446 | t3m_01803 | pfam06745      | KaiC                           |                                                  | 1.50E-05 |
| 2572233446 | t3m_01803 | Locus_type     |                                | CDS                                              |          |
| 2572233446 | t3m_01803 | Product_name   |                                | KaiC                                             |          |
| 2572233446 | t3m_01803 | Scaffold       |                                | t3m_contig_70_1517_len_7421_read_count_590785.63 |          |
| 2572233446 | t3m_01803 | Coordinates    |                                | 6929..7420(-)                                    |          |
| 2572233446 | t3m_01803 | DNA_length     |                                | 492bp                                            |          |
| 2572233446 | t3m_01803 | Protein_length |                                | 163aa                                            |          |
| 2572233446 | t3m_01803 | GC             |                                |                                                  | 0.64     |
| 2572233447 | t3m_01804 | Locus_type     |                                | CDS                                              |          |
| 2572233447 | t3m_01804 | Product_name   |                                | hypothetical protein                             |          |
| 2572233447 | t3m_01804 | Scaffold       |                                | t3m_contig_70_1550_len_7292_read_count_487136.64 |          |
| 2572233447 | t3m_01804 | Coordinates    |                                | 1..312(-)                                        |          |
| 2572233447 | t3m_01804 | DNA_length     |                                | 312bp                                            |          |
| 2572233447 | t3m_01804 | Protein_length |                                | 104aa                                            |          |
| 2572233447 | t3m_01804 | GC             |                                |                                                  | 0.7      |
| 2572233448 | t3m_01805 | pfam00156      | Pribosyltran                   |                                                  | 3.20E-13 |
| 2572233448 | t3m_01805 | TIGR01134      | amidophosphoribosyltransferase |                                                  | 6.70E-79 |
| 2572233448 | t3m_01805 | Locus_type     |                                | CDS                                              |          |
| 2572233448 | t3m_01805 | Product_name   |                                | Phosphoribosyl transferase domain                |          |
| 2572233448 | t3m_01805 | Scaffold       |                                | t3m_contig_70_1550_len_7292_read_count_487136.64 |          |
| 2572233448 | t3m_01805 | Coordinates    |                                | 280..1023(+)                                     |          |
| 2572233448 | t3m_01805 | DNA_length     |                                | 744bp                                            |          |
| 2572233448 | t3m_01805 | Protein_length |                                | 247aa                                            |          |
| 2572233448 | t3m_01805 | GC             |                                |                                                  | 0.69     |
| 2572233449 | t3m_01806 | pfam01798      | Nop                            |                                                  | 7.30E-22 |
| 2572233449 | t3m_01806 | KO:K14564      | nucleolar protein 56           |                                                  | 9.70E-17 |
| 2572233449 | t3m_01806 | Locus_type     |                                | CDS                                              |          |
| 2572233449 | t3m_01806 | Product_name   |                                | Putative snoRNA binding domain                   |          |
| 2572233449 | t3m_01806 | Scaffold       |                                | t3m_contig_70_1550_len_7292_read_count_487136.64 |          |
| 2572233449 | t3m_01806 | Coordinates    |                                | 1027..1950(+)                                    |          |

|            |           |                |                                                     |          |
|------------|-----------|----------------|-----------------------------------------------------|----------|
| 2572233449 | t3m_01806 | DNA_length     | 924bp                                               |          |
| 2572233449 | t3m_01806 | Protein_length | 307aa                                               |          |
| 2572233449 | t3m_01806 | GC             |                                                     | 0.74     |
| 2572233450 | t3m_01807 | COG_category   | [J] Translation, ribosomal structure and biogenesis |          |
| 2572233450 | t3m_01807 | COG1889        | Fibrillarin-like rRNA methylase                     | 3.00E-45 |
| 2572233450 | t3m_01807 | pfam01269      | Fibrillarin                                         | 1.70E-51 |
| 2572233450 | t3m_01807 | KO:K04795      | fibrillarin-like pre-rRNA processing protein        | 1.30E-35 |
| 2572233450 | t3m_01807 | Locus_type     | CDS                                                 |          |
| 2572233450 | t3m_01807 | Product_name   | Fibrillarin-like rRNA methylase                     |          |
| 2572233450 | t3m_01807 | Scaffold       | t3m_contig_70_1550_len_7292_read_count_487136.64    |          |
| 2572233450 | t3m_01807 | Coordinates    | 1947..2720(+)                                       |          |
| 2572233450 | t3m_01807 | DNA_length     | 774bp                                               |          |
| 2572233450 | t3m_01807 | Protein_length | 257aa                                               |          |
| 2572233450 | t3m_01807 | GC             |                                                     | 0.73     |
| 2572233451 | t3m_01808 | pfam02824      | TGS                                                 | 8.10E-11 |
| 2572233451 | t3m_01808 | Locus_type     | CDS                                                 |          |
| 2572233451 | t3m_01808 | Product_name   | TGS domain                                          |          |
| 2572233451 | t3m_01808 | Scaffold       | t3m_contig_70_1550_len_7292_read_count_487136.64    |          |
| 2572233451 | t3m_01808 | Coordinates    | 2677..3228(-)                                       |          |
| 2572233451 | t3m_01808 | DNA_length     | 552bp                                               |          |
| 2572233451 | t3m_01808 | Protein_length | 183aa                                               |          |
| 2572233451 | t3m_01808 | GC             |                                                     | 0.68     |
| 2572233452 | t3m_01809 | Locus_type     | CDS                                                 |          |
| 2572233452 | t3m_01809 | Product_name   | hypothetical protein                                |          |
| 2572233452 | t3m_01809 | Scaffold       | t3m_contig_70_1550_len_7292_read_count_487136.64    |          |
| 2572233452 | t3m_01809 | Coordinates    | 3214..3924(+)                                       |          |
| 2572233452 | t3m_01809 | DNA_length     | 711bp                                               |          |
| 2572233452 | t3m_01809 | Protein_length | 236aa                                               |          |
| 2572233452 | t3m_01809 | GC             |                                                     | 0.67     |
| 2572233453 | t3m_01810 | COG_category   | [R] General function prediction only                |          |

|            |           |                |                                                                      |          |
|------------|-----------|----------------|----------------------------------------------------------------------|----------|
| 2572233453 | t3m_01810 | COG0433        | Predicted ATPase                                                     | 5.00E-07 |
| 2572233453 | t3m_01810 | pfam12846      | AAA_10                                                               | 7.60E-17 |
| 2572233453 | t3m_01810 | Locus_type     | CDS                                                                  |          |
| 2572233453 | t3m_01810 | Product_name   | Predicted ATPase                                                     |          |
| 2572233453 | t3m_01810 | Scaffold       | t3m_contig_70_1550_len_7292_read_count_487136.64                     |          |
| 2572233453 | t3m_01810 | Coordinates    | 3921..6284(+)                                                        |          |
| 2572233453 | t3m_01810 | DNA_length     | 2364bp                                                               |          |
| 2572233453 | t3m_01810 | Protein_length | 787aa                                                                |          |
| 2572233453 | t3m_01810 | GC             |                                                                      | 0.71     |
| 2572233454 | t3m_01811 | COG_category   | [T] Signal transduction mechanisms                                   |          |
| 2572233454 | t3m_01811 | COG0467        | RecA-superfamily ATPases implicated in signal transduction           | 3.00E-31 |
| 2572233454 | t3m_01811 | pfam06745      | KaiC                                                                 | 1.80E-52 |
| 2572233454 | t3m_01811 | Locus_type     | CDS                                                                  |          |
| 2572233454 | t3m_01811 | Product_name   | RecA-superfamily ATPases implicated in signal transduction           |          |
| 2572233454 | t3m_01811 | Scaffold       | t3m_contig_70_1550_len_7292_read_count_487136.64                     |          |
| 2572233454 | t3m_01811 | Coordinates    | 6401..7123(+)                                                        |          |
| 2572233454 | t3m_01811 | DNA_length     | 723bp                                                                |          |
| 2572233454 | t3m_01811 | Protein_length | 240aa                                                                |          |
| 2572233454 | t3m_01811 | GC             |                                                                      | 0.67     |
| 2572233455 | t3m_01812 | Locus_type     | CDS                                                                  |          |
| 2572233455 | t3m_01812 | Product_name   | hypothetical protein                                                 |          |
| 2572233455 | t3m_01812 | Scaffold       | t3m_contig_70_1550_len_7292_read_count_487136.64                     |          |
| 2572233455 | t3m_01812 | Coordinates    | 7127..7291(+)                                                        |          |
| 2572233455 | t3m_01812 | DNA_length     | 165bp                                                                |          |
| 2572233455 | t3m_01812 | Protein_length | 55aa                                                                 |          |
| 2572233455 | t3m_01812 | GC             |                                                                      | 0.72     |
| 2572233456 | t3m_01813 | pfam10431      | ClpB_D2-small                                                        | 1.50E-22 |
| 2572233456 | t3m_01813 | pfam07724      | AAA_2                                                                | 1.40E-54 |
| 2572233456 | t3m_01813 | Locus_type     | CDS                                                                  |          |
| 2572233456 | t3m_01813 | Product_name   | C-terminal, D2-small domain, of ClpB protein/AAA domain (Cdc48 subfa |          |
| 2572233456 | t3m_01813 | Scaffold       | t3m_contig_70_1921_len_6375_read_count_464708.65                     |          |

|            |           |                |                                                                  |          |
|------------|-----------|----------------|------------------------------------------------------------------|----------|
| 2572233456 | t3m_01813 | Coordinates    | 3..1592(+)                                                       |          |
| 2572233456 | t3m_01813 | DNA_length     | 1590bp                                                           |          |
| 2572233456 | t3m_01813 | Protein_length | 529aa                                                            |          |
| 2572233456 | t3m_01813 | GC             |                                                                  | 0.68     |
| 2572233457 | t3m_01814 | pfam03144      | GTP_EFTU_D2                                                      | 1.00E-10 |
| 2572233457 | t3m_01814 | Locus_type     | CDS                                                              |          |
| 2572233457 | t3m_01814 | Product_name   | Elongation factor Tu domain 2                                    |          |
| 2572233457 | t3m_01814 | Scaffold       | t3m_contig_70_1921_len_6375_read_count_464708.65                 |          |
| 2572233457 | t3m_01814 | Coordinates    | 1589..2524(+)                                                    |          |
| 2572233457 | t3m_01814 | DNA_length     | 936bp                                                            |          |
| 2572233457 | t3m_01814 | Protein_length | 311aa                                                            |          |
| 2572233457 | t3m_01814 | GC             |                                                                  | 0.71     |
| 2572233458 | t3m_01815 | KEGG_module    | M00343: Archaeal proteasome                                      |          |
| 2572233458 | t3m_01815 | COG_category   | [O] Posttranslational modification, protein turnover, chaperones |          |
| 2572233458 | t3m_01815 | COG1222        | ATP-dependent 26S proteasome regulatory subunit                  | 0.00E+00 |
| 2572233458 | t3m_01815 | pfam00004      | AAA                                                              | 4.10E-42 |
| 2572233458 | t3m_01815 | TIGR01242      | 26S proteasome subunit P45 family                                | 0.00E+00 |
| 2572233458 | t3m_01815 | KO:K03420      | proteasome regulatory subunit                                    | 0.00E+00 |
| 2572233458 | t3m_01815 | Locus_type     | CDS                                                              |          |
| 2572233458 | t3m_01815 | Product_name   | Proteasome-activating nucleotidase                               |          |
| 2572233458 | t3m_01815 | Scaffold       | t3m_contig_70_1921_len_6375_read_count_464708.65                 |          |
| 2572233458 | t3m_01815 | Coordinates    | 2576..3781(-)                                                    |          |
| 2572233458 | t3m_01815 | DNA_length     | 1206bp                                                           |          |
| 2572233458 | t3m_01815 | Protein_length | 401aa                                                            |          |
| 2572233458 | t3m_01815 | GC             |                                                                  | 0.68     |
| 2572233459 | t3m_01816 | Metacyc        | PWY-6654: phosphopantothenate biosynthesis III                   |          |
| 2572233459 | t3m_01816 | IMG_pathway    | 116: Coenzyme A biosynthesis                                     |          |
| 2572233459 | t3m_01816 | COG_category   | [R] General function prediction only                             |          |
| 2572233459 | t3m_01816 | COG1829        | Predicted archaeal kinase (sugar kinase superfamily)             | 1.00E-39 |
| 2572233459 | t3m_01816 | EC:2.7.1.169   | Pantoate kinase.                                                 |          |
| 2572233459 | t3m_01816 | KO:K06982      | pantoate kinase [EC:2.7.1.169]                                   | 3.70E-29 |

|            |           |                |                                                                       |          |
|------------|-----------|----------------|-----------------------------------------------------------------------|----------|
| 2572233459 | t3m_01816 | ITERM:00184    | pantothenate kinase (EC 2.7.1.33)                                     |          |
| 2572233459 | t3m_01816 | Locus_type     | CDS                                                                   |          |
| 2572233459 | t3m_01816 | Product_name   | pantothenate kinase (EC 2.7.1.33)                                     |          |
| 2572233459 | t3m_01816 | Scaffold       | t3m_contig_70_1921_len_6375_read_count_464708.65                      |          |
| 2572233459 | t3m_01816 | Coordinates    | 3876..4784(+)                                                         |          |
| 2572233459 | t3m_01816 | DNA_length     | 909bp                                                                 |          |
| 2572233459 | t3m_01816 | Protein_length | 302aa                                                                 |          |
| 2572233459 | t3m_01816 | GC             |                                                                       | 0.73     |
|            |           |                |                                                                       |          |
| 2572233460 | t3m_01817 | KEGG_module    | M00179: Ribosome, archaea                                             |          |
| 2572233460 | t3m_01817 | KEGG_module    | M00177: Ribosome, eukaryotes                                          |          |
| 2572233460 | t3m_01817 | COG_category   | [J] Translation, ribosomal structure and biogenesis                   |          |
| 2572233460 | t3m_01817 | COG0197        | Ribosomal protein L16/L10E                                            | 2.00E-23 |
| 2572233460 | t3m_01817 | pfam00252      | Ribosomal_L16                                                         | 3.10E-26 |
| 2572233460 | t3m_01817 | TIGR00279      | ribosomal protein L10.e                                               | 1.00E-59 |
| 2572233460 | t3m_01817 | KO:K02866      | large subunit ribosomal protein L10e                                  | 2.70E-42 |
| 2572233460 | t3m_01817 | Locus_type     | CDS                                                                   |          |
| 2572233460 | t3m_01817 | Product_name   | LSU ribosomal protein L10AE                                           |          |
| 2572233460 | t3m_01817 | Scaffold       | t3m_contig_70_1921_len_6375_read_count_464708.65                      |          |
| 2572233460 | t3m_01817 | Coordinates    | 4880..5365(+)                                                         |          |
| 2572233460 | t3m_01817 | DNA_length     | 486bp                                                                 |          |
| 2572233460 | t3m_01817 | Protein_length | 161aa                                                                 |          |
| 2572233460 | t3m_01817 | GC             |                                                                       | 0.67     |
|            |           |                |                                                                       |          |
| 2572233461 | t3m_01818 | COG_category   | [T] Signal transduction mechanisms                                    |          |
| 2572233461 | t3m_01818 | COG0589        | Universal stress protein UspA and related nucleotide-binding proteins | 7.00E-18 |
| 2572233461 | t3m_01818 | pfam00582      | Usp                                                                   | 2.50E-31 |
| 2572233461 | t3m_01818 | Locus_type     | CDS                                                                   |          |
| 2572233461 | t3m_01818 | Product_name   | Universal stress protein UspA and related nucleotide-binding proteins |          |
| 2572233461 | t3m_01818 | Scaffold       | t3m_contig_70_1921_len_6375_read_count_464708.65                      |          |
| 2572233461 | t3m_01818 | Coordinates    | 5346..5816(-)                                                         |          |
| 2572233461 | t3m_01818 | DNA_length     | 471bp                                                                 |          |
| 2572233461 | t3m_01818 | Protein_length | 156aa                                                                 |          |
| 2572233461 | t3m_01818 | GC             |                                                                       | 0.67     |

|            |           |                |                                                                       |          |
|------------|-----------|----------------|-----------------------------------------------------------------------|----------|
| 2572233462 | t3m_01819 | KEGG_module    | M00032: Lysine degradation, lysine => saccharopine => acetoacetyl-CoA |          |
| 2572233462 | t3m_01819 | KEGG_module    | M00013: Malonate semialdehyde pathway, propanoyl-CoA => Acetyl-CoA    |          |
| 2572233462 | t3m_01819 | KEGG_module    | M00087: beta-Oxidation                                                |          |
| 2572233462 | t3m_01819 | Metacyc        | PWY-5109: 2-methylbutyrate biosynthesis                               |          |
| 2572233462 | t3m_01819 | Metacyc        | PWY-7094: fatty acid salvage                                          |          |
| 2572233462 | t3m_01819 | Metacyc        | PWY-7007: methyl ketone biosynthesis                                  |          |
| 2572233462 | t3m_01819 | Metacyc        | PWY-735: jasmonic acid biosynthesis                                   |          |
| 2572233462 | t3m_01819 | Metacyc        | VALDEG-PWY: valine degradation I                                      |          |
| 2572233462 | t3m_01819 | Metacyc        | PWY0-321: phenylacetate degradation I (aerobic)                       |          |
| 2572233462 | t3m_01819 | Metacyc        | PWY-5138: unsaturated, even numbered fatty acid &beta;-oxidation      |          |
| 2572233462 | t3m_01819 | Metacyc        | PWY-6435: 4-hydroxybenzoate biosynthesis V                            |          |
| 2572233462 | t3m_01819 | Metacyc        | ILEUDEG-PWY: isoleucine degradation I                                 |          |
| 2572233462 | t3m_01819 | Metacyc        | PWY-5136: fatty acid &beta;-oxidation II (peroxisome)                 |          |
| 2572233462 | t3m_01819 | Metacyc        | PWY-7046: 4-coumarate degradation (anaerobic)                         |          |
| 2572233462 | t3m_01819 | Metacyc        | PWY66-391: fatty acid &beta;-oxidation VI (peroxisome)                |          |
| 2572233462 | t3m_01819 | Metacyc        | FAO-PWY: fatty acid &beta;-oxidation I                                |          |
| 2572233462 | t3m_01819 | COG_category   | [I] Lipid transport and metabolism                                    |          |
| 2572233462 | t3m_01819 | COG1024        | Enoyl-CoA hydratase/carnithine racemase                               | 7.00E-52 |
| 2572233462 | t3m_01819 | pfam00378      | ECH                                                                   | 7.50E-66 |
| 2572233462 | t3m_01819 | EC:4.2.1.17    | Enoyl-CoA hydratase.                                                  |          |
| 2572233462 | t3m_01819 | KO:K01692      | enoyl-CoA hydratase [EC:4.2.1.17]                                     | 0.00E+00 |
| 2572233462 | t3m_01819 | Locus_type     | CDS                                                                   |          |
| 2572233462 | t3m_01819 | Product_name   | Enoyl-CoA hydratase/carnithine racemase                               |          |
| 2572233462 | t3m_01819 | Scaffold       | t3m_contig_70_1923_len_6371_read_count_527639.66                      |          |
| 2572233462 | t3m_01819 | Coordinates    | 60..953(-)                                                            |          |
| 2572233462 | t3m_01819 | DNA_length     | 894bp                                                                 |          |
| 2572233462 | t3m_01819 | Protein_length | 297aa                                                                 |          |
| 2572233462 | t3m_01819 | GC             |                                                                       | 0.67     |
| 2572233463 | t3m_01820 | pfam01798      | Nop                                                                   | 2.70E-37 |
| 2572233463 | t3m_01820 | Locus_type     | CDS                                                                   |          |
| 2572233463 | t3m_01820 | Product_name   | Putative snoRNA binding domain                                        |          |
| 2572233463 | t3m_01820 | Scaffold       | t3m_contig_70_1923_len_6371_read_count_527639.66                      |          |



|            |           |                |                                                                      |          |
|------------|-----------|----------------|----------------------------------------------------------------------|----------|
| 2572233463 | t3m_01820 | Coordinates    | 983..2053(+)                                                         |          |
| 2572233463 | t3m_01820 | DNA_length     | 1071bp                                                               |          |
| 2572233463 | t3m_01820 | Protein_length | 356aa                                                                |          |
| 2572233463 | t3m_01820 | GC             |                                                                      | 0.7      |
| 2572233464 | t3m_01821 | pfam00578      | AhpC-TSA                                                             | 1.00E-20 |
| 2572233464 | t3m_01821 | Locus_type     | CDS                                                                  |          |
| 2572233464 | t3m_01821 | Product_name   | AhpC/TSA family                                                      |          |
| 2572233464 | t3m_01821 | Scaffold       | t3m_contig_70_1923_len_6371_read_count_527639.66                     |          |
| 2572233464 | t3m_01821 | Coordinates    | 2015..2542(-)                                                        |          |
| 2572233464 | t3m_01821 | DNA_length     | 528bp                                                                |          |
| 2572233464 | t3m_01821 | Protein_length | 175aa                                                                |          |
| 2572233464 | t3m_01821 | GC             |                                                                      | 0.66     |
| 2572233465 | t3m_01822 | COG_category   | [H] Coenzyme transport and metabolism                                |          |
| 2572233465 | t3m_01822 | COG0095        | Lipoate-protein ligase A                                             | 2.00E-16 |
| 2572233465 | t3m_01822 | pfam03099      | BPL_LplA_LipB                                                        | 6.60E-09 |
| 2572233465 | t3m_01822 | Locus_type     | CDS                                                                  |          |
| 2572233465 | t3m_01822 | Product_name   | Lipoate-protein ligase A                                             |          |
| 2572233465 | t3m_01822 | Scaffold       | t3m_contig_70_1923_len_6371_read_count_527639.66                     |          |
| 2572233465 | t3m_01822 | Coordinates    | 2599..3336(+)                                                        |          |
| 2572233465 | t3m_01822 | DNA_length     | 738bp                                                                |          |
| 2572233465 | t3m_01822 | Protein_length | 245aa                                                                |          |
| 2572233465 | t3m_01822 | GC             |                                                                      | 0.69     |
| 2572233466 | t3m_01823 | Metacyc        | PWY-6753: <i>S</i>-methyl-5'-thioadenosine degradation III           |          |
| 2572233466 | t3m_01823 | COG_category   | [F] Nucleotide transport and metabolism                              |          |
| 2572233466 | t3m_01823 | COG_category   | [R] General function prediction only                                 |          |
| 2572233466 | t3m_01823 | COG0402        | Cytosine deaminase and related metal-dependent hydrolases            | 2.00E-79 |
| 2572233466 | t3m_01823 | pfam01979      | Amidohydro_1                                                         | 1.40E-47 |
| 2572233466 | t3m_01823 | EC:3.5.4.31    | S-methyl-5'-thioadenosine deaminase.                                 |          |
| 2572233466 | t3m_01823 | EC:3.5.4.28    | S-adenosylhomocysteine deaminase.                                    |          |
| 2572233466 | t3m_01823 | KO:K12960      | 5-methylthioadenosine/S-adenosylhomocysteine deaminase [EC:3.5.4.31] | 0.00E+00 |
| 2572233466 | t3m_01823 | Locus_type     | CDS                                                                  |          |

|            |           |                |                                                                                |          |
|------------|-----------|----------------|--------------------------------------------------------------------------------|----------|
| 2572233466 | t3m_01823 | Product_name   | Cytosine deaminase and related metal-dependent hydrolases                      |          |
| 2572233466 | t3m_01823 | Scaffold       | t3m_contig_70_1923_len_6371_read_count_527639.66                               |          |
| 2572233466 | t3m_01823 | Coordinates    | 3353..4669(-)                                                                  |          |
| 2572233466 | t3m_01823 | DNA_length     | 1317bp                                                                         |          |
| 2572233466 | t3m_01823 | Protein_length | 438aa                                                                          |          |
| 2572233466 | t3m_01823 | GC             |                                                                                | 0.69     |
| 2572233467 | t3m_01824 | COG_category   | [L] Replication, recombination and repair                                      |          |
| 2572233467 | t3m_01824 | COG0187        | Type IIA topoisomerase (DNA gyrase/topo II, topoisomerase IV), B subu          | 0.00E+00 |
| 2572233467 | t3m_01824 | pfam00204      | DNA_gyraseB                                                                    | 4.10E-57 |
| 2572233467 | t3m_01824 | pfam00986      | DNA_gyraseB_C                                                                  | 2.90E-24 |
| 2572233467 | t3m_01824 | pfam01751      | Toprim                                                                         | 5.90E-27 |
| 2572233467 | t3m_01824 | EC:5.99.1.3    | DNA topoisomerase (ATP-hydrolyzing).                                           |          |
| 2572233467 | t3m_01824 | KO:K02470      | DNA gyrase subunit B [EC:5.99.1.3]                                             | 0.00E+00 |
| 2572233467 | t3m_01824 | Locus_type     | CDS                                                                            |          |
| 2572233467 | t3m_01824 | Product_name   | DNA gyrase subunit B (EC 5.99.1.3)                                             |          |
| 2572233467 | t3m_01824 | Scaffold       | t3m_contig_70_1923_len_6371_read_count_527639.66                               |          |
| 2572233467 | t3m_01824 | Coordinates    | 4765..6369(-)                                                                  |          |
| 2572233467 | t3m_01824 | DNA_length     | 1605bp                                                                         |          |
| 2572233467 | t3m_01824 | Protein_length | 534aa                                                                          |          |
| 2572233467 | t3m_01824 | GC             |                                                                                | 0.67     |
| 2572233468 | t3m_01825 | Locus_type     | CDS                                                                            |          |
| 2572233468 | t3m_01825 | Product_name   | hypothetical protein                                                           |          |
| 2572233468 | t3m_01825 | Scaffold       | t3m_contig_70_2198_len_5839_read_count_452084.67                               |          |
| 2572233468 | t3m_01825 | Coordinates    | 194..418(-)                                                                    |          |
| 2572233468 | t3m_01825 | DNA_length     | 225bp                                                                          |          |
| 2572233468 | t3m_01825 | Protein_length | 74aa                                                                           |          |
| 2572233468 | t3m_01825 | GC             |                                                                                | 0.69     |
| 2572233469 | t3m_01826 | KEGG_module    | M00173: Reductive citric acid cycle (Arnon-Buchanan cycle)                     |          |
| 2572233469 | t3m_01826 | KEGG_module    | M00374: Dicarboxylate-hydroxybutyrate cycle                                    |          |
| 2572233469 | t3m_01826 | KEGG_module    | M00011: Citrate cycle, second carbon oxidation, 2-oxoglutarate => oxaloacetate |          |
| 2572233469 | t3m_01826 | KEGG_module    | M00009: Citrate cycle (TCA cycle, Krebs cycle)                                 |          |

|            |           |                |                                                                                |           |
|------------|-----------|----------------|--------------------------------------------------------------------------------|-----------|
| 2572233469 | t3m_01826 | Metacyc        | PWY-5538: pyruvate fermentation to acetate VI                                  |           |
| 2572233469 | t3m_01826 | Metacyc        | PWY-5690: TCA cycle II (eukaryotic)                                            |           |
| 2572233469 | t3m_01826 | Metacyc        | PWY-6969: TCA cycle V (2-oxoglutarate:ferredoxin oxidoreductase)               |           |
| 2572233469 | t3m_01826 | Metacyc        | PWY-5392: reductive TCA cycle II                                               |           |
| 2572233469 | t3m_01826 | Metacyc        | PWY-5537: pyruvate fermentation to acetate V                                   |           |
| 2572233469 | t3m_01826 | Metacyc        | PWY-5913: TCA cycle VI (obligate autotrophs)                                   |           |
| 2572233469 | t3m_01826 | Metacyc        | P42-PWY: incomplete reductive TCA cycle                                        |           |
| 2572233469 | t3m_01826 | Metacyc        | PWY-6728: methylaspartate cycle                                                |           |
| 2572233469 | t3m_01826 | Metacyc        | P23-PWY: reductive TCA cycle I                                                 |           |
| 2572233469 | t3m_01826 | Metacyc        | TCA: TCA cycle I (prokaryotic)                                                 |           |
| 2572233469 | t3m_01826 | COG_category   | [C] Energy production and conversion                                           |           |
| 2572233469 | t3m_01826 | COG0074        | Succinyl-CoA synthetase, alpha subunit                                         | 2.00E-111 |
| 2572233469 | t3m_01826 | pfam02629      | CoA_binding                                                                    | 5.20E-25  |
| 2572233469 | t3m_01826 | pfam00549      | Ligase_CoA                                                                     | 1.40E-17  |
| 2572233469 | t3m_01826 | EC:6.2.1.5     | Succinate--CoA ligase (ADP-forming).                                           |           |
| 2572233469 | t3m_01826 | TIGR01019      | succinyl-CoA synthetase, alpha subunit                                         | 0.00E+00  |
| 2572233469 | t3m_01826 | KO:K01902      | succinyl-CoA synthetase alpha subunit [EC:6.2.1.5]                             | 0.00E+00  |
| 2572233469 | t3m_01826 | Locus_type     | CDS                                                                            |           |
| 2572233469 | t3m_01826 | Product_name   | succinyl-CoA synthetase, alpha subunit                                         |           |
| 2572233469 | t3m_01826 | Scaffold       | t3m_contig_70_2198_len_5839_read_count_452084.67                               |           |
| 2572233469 | t3m_01826 | Coordinates    | 415..1296(-)                                                                   |           |
| 2572233469 | t3m_01826 | DNA_length     | 882bp                                                                          |           |
| 2572233469 | t3m_01826 | Protein_length | 293aa                                                                          |           |
| 2572233469 | t3m_01826 | GC             |                                                                                | 0.7       |
| 2572233470 | t3m_01827 | KEGG_module    | M00374: Dicarboxylate-hydroxybutyrate cycle                                    |           |
| 2572233470 | t3m_01827 | KEGG_module    | M00011: Citrate cycle, second carbon oxidation, 2-oxoglutarate => oxaloacetate |           |
| 2572233470 | t3m_01827 | KEGG_module    | M00009: Citrate cycle (TCA cycle, Krebs cycle)                                 |           |
| 2572233470 | t3m_01827 | KEGG_module    | M00173: Reductive citric acid cycle (Arnon-Buchanan cycle)                     |           |
| 2572233470 | t3m_01827 | Metacyc        | PWY-5537: pyruvate fermentation to acetate V                                   |           |
| 2572233470 | t3m_01827 | Metacyc        | PWY-5392: reductive TCA cycle II                                               |           |
| 2572233470 | t3m_01827 | Metacyc        | PWY-5538: pyruvate fermentation to acetate VI                                  |           |
| 2572233470 | t3m_01827 | Metacyc        | P23-PWY: reductive TCA cycle I                                                 |           |
| 2572233470 | t3m_01827 | Metacyc        | PWY-5913: TCA cycle VI (obligate autotrophs)                                   |           |

|            |           |                |                                                                  |           |
|------------|-----------|----------------|------------------------------------------------------------------|-----------|
| 2572233470 | t3m_01827 | Metacyc        | PWY-5690: TCA cycle II (eukaryotic)                              |           |
| 2572233470 | t3m_01827 | Metacyc        | PWY-6728: methylaspartate cycle                                  |           |
| 2572233470 | t3m_01827 | Metacyc        | TCA: TCA cycle I (prokaryotic)                                   |           |
| 2572233470 | t3m_01827 | Metacyc        | P42-PWY: incomplete reductive TCA cycle                          |           |
| 2572233470 | t3m_01827 | Metacyc        | PWY-6969: TCA cycle V (2-oxoglutarate:ferredoxin oxidoreductase) |           |
| 2572233470 | t3m_01827 | COG_category   | [C] Energy production and conversion                             |           |
| 2572233470 | t3m_01827 | COG0045        | Succinyl-CoA synthetase, beta subunit                            | 2.00E-101 |
| 2572233470 | t3m_01827 | pfam08442      | ATP-grasp_2                                                      | 9.30E-53  |
| 2572233470 | t3m_01827 | pfam00549      | Ligase_CoA                                                       | 1.30E-13  |
| 2572233470 | t3m_01827 | EC:6.2.1.5     | Succinate--CoA ligase (ADP-forming).                             |           |
| 2572233470 | t3m_01827 | TIGR01016      | succinyl-CoA synthetase, beta subunit                            | 7.50E-112 |
| 2572233470 | t3m_01827 | KO:K01903      | succinyl-CoA synthetase beta subunit [EC:6.2.1.5]                | 0.00E+00  |
| 2572233470 | t3m_01827 | Locus_type     | CDS                                                              |           |
| 2572233470 | t3m_01827 | Product_name   | Succinyl-CoA synthetase, beta subunit                            |           |
| 2572233470 | t3m_01827 | Scaffold       | t3m_contig_70_2198_len_5839_read_count_452084.67                 |           |
| 2572233470 | t3m_01827 | Coordinates    | 1293..2426(-)                                                    |           |
| 2572233470 | t3m_01827 | DNA_length     | 1134bp                                                           |           |
| 2572233470 | t3m_01827 | Protein_length | 377aa                                                            |           |
| 2572233470 | t3m_01827 | GC             |                                                                  | 0.69      |
| 2572233471 | t3m_01828 | COG_category   | [P] Inorganic ion transport and metabolism                       |           |
| 2572233471 | t3m_01828 | COG0428        | Predicted divalent heavy-metal cations transporter               | 3.00E-05  |
| 2572233471 | t3m_01828 | KO:K07238      | zinc transporter, ZIP family                                     | 8.30E-30  |
| 2572233471 | t3m_01828 | Locus_type     | CDS                                                              |           |
| 2572233471 | t3m_01828 | Product_name   | Predicted divalent heavy-metal cations transporter               |           |
| 2572233471 | t3m_01828 | Scaffold       | t3m_contig_70_2198_len_5839_read_count_452084.67                 |           |
| 2572233471 | t3m_01828 | Coordinates    | 2620..3390(+)                                                    |           |
| 2572233471 | t3m_01828 | DNA_length     | 771bp                                                            |           |
| 2572233471 | t3m_01828 | Protein_length | 256aa                                                            |           |
| 2572233471 | t3m_01828 | GC             |                                                                  | 0.63      |
| 2572233471 | t3m_01828 | Transmembrane  | Yes                                                              |           |
| 2572233472 | t3m_01829 | KEGG_module    | M00120: Coenzyme A biosynthesis, pantothenate => CoA             |           |
| 2572233472 | t3m_01829 | Metacyc        | COA-PWY: coenzyme A biosynthesis                                 |           |

|            |           |                |                                                                    |          |
|------------|-----------|----------------|--------------------------------------------------------------------|----------|
| 2572233472 | t3m_01829 | COG_category   | [H] Coenzyme transport and metabolism                              |          |
| 2572233472 | t3m_01829 | COG0452        | Phosphopantothenoylcysteine synthetase/decarboxylase               | 1.00E-69 |
| 2572233472 | t3m_01829 | pfam02441      | Flavoprotein                                                       | 5.20E-28 |
| 2572233472 | t3m_01829 | pfam04127      | DFP                                                                | 9.70E-36 |
| 2572233472 | t3m_01829 | EC:6.3.2.5     | Phosphopantothenate--cysteine ligase.                              |          |
| 2572233472 | t3m_01829 | EC:4.1.1.36    | Phosphopantothenoylcysteine decarboxylase.                         |          |
| 2572233472 | t3m_01829 | TIGR00521      | phosphopantothenoylcysteine decarboxylase / phosphopantothenate--  | 1.30E-87 |
| 2572233472 | t3m_01829 | KO:K13038      | phosphopantothenoylcysteine decarboxylase / phosphopantothenate--  | 0.00E+00 |
| 2572233472 | t3m_01829 | Locus_type     | CDS                                                                |          |
| 2572233472 | t3m_01829 | Product_name   | phosphopantothenoylcysteine decarboxylase / phosphopantothenate--c |          |
| 2572233472 | t3m_01829 | Scaffold       | t3m_contig_70_2198_len_5839_read_count_452084.67                   |          |
| 2572233472 | t3m_01829 | Coordinates    | 3445..4743(-)                                                      |          |
| 2572233472 | t3m_01829 | DNA_length     | 1299bp                                                             |          |
| 2572233472 | t3m_01829 | Protein_length | 432aa                                                              |          |
| 2572233472 | t3m_01829 | GC             |                                                                    | 0.71     |
| 2572233473 | t3m_01830 | COG_category   | [R] General function prediction only                               |          |
| 2572233473 | t3m_01830 | COG0546        | Predicted phosphatases                                             | 2.00E-18 |
| 2572233473 | t3m_01830 | pfam13419      | HAD_2                                                              | 2.70E-15 |
| 2572233473 | t3m_01830 | Locus_type     | CDS                                                                |          |
| 2572233473 | t3m_01830 | Product_name   | Predicted phosphatases                                             |          |
| 2572233473 | t3m_01830 | Scaffold       | t3m_contig_70_2198_len_5839_read_count_452084.67                   |          |
| 2572233473 | t3m_01830 | Coordinates    | 4742..5713(+)                                                      |          |
| 2572233473 | t3m_01830 | DNA_length     | 972bp                                                              |          |
| 2572233473 | t3m_01830 | Protein_length | 323aa                                                              |          |
| 2572233473 | t3m_01830 | GC             |                                                                    | 0.7      |
| 2572233474 | t3m_01831 | pfam00627      | UBA                                                                | 9.40E-06 |
| 2572233474 | t3m_01831 | Locus_type     | CDS                                                                |          |
| 2572233474 | t3m_01831 | Product_name   | UBA/TS-N domain                                                    |          |
| 2572233474 | t3m_01831 | Scaffold       | t3m_contig_70_2516_len_5342_read_count_446082.68                   |          |
| 2572233474 | t3m_01831 | Coordinates    | 3..206(+)                                                          |          |
| 2572233474 | t3m_01831 | DNA_length     | 204bp                                                              |          |
| 2572233474 | t3m_01831 | Protein_length | 67aa                                                               |          |

|            |           |                |                                                                                |          |
|------------|-----------|----------------|--------------------------------------------------------------------------------|----------|
| 2572233474 | t3m_01831 | GC             |                                                                                | 0.77     |
| 2572233475 | t3m_01832 | Metacyc        | PWY-6383: mono-<i>trans</i>, poly-<i>cis</i> decaprenyl phosphate biosynthesis |          |
| 2572233475 | t3m_01832 | Metacyc        | PWY-6797: 6-hydroxymethyl-dihydropterin diphosphate biosynthesis II (archaea)  |          |
| 2572233475 | t3m_01832 | Metacyc        | PWY-6147: 6-hydroxymethyl-dihydropterin diphosphate biosynthesis I             |          |
| 2572233475 | t3m_01832 | Metacyc        | PWY-7206: pyrimidine deoxyribonucleotides dephosphorylation                    |          |
| 2572233475 | t3m_01832 | Metacyc        | PWY-6502: oxidized GTP and dGTP detoxification                                 |          |
| 2572233475 | t3m_01832 | Metacyc        | PWY-6575: juvenile hormone III biosynthesis I                                  |          |
| 2572233475 | t3m_01832 | COG_category   | [F] Nucleotide transport and metabolism                                        |          |
| 2572233475 | t3m_01832 | COG1051        | ADP-ribose pyrophosphatase                                                     | 1.00E-04 |
| 2572233475 | t3m_01832 | pfam00293      | NUDIX                                                                          | 7.90E-13 |
| 2572233475 | t3m_01832 | EC:3.6.1.-     | Hydrolases. Acting on acid anhydrides. In phosphorous-containing anhydrides.   |          |
| 2572233475 | t3m_01832 | KO:K08310      | dATP pyrophosphohydrolase [EC:3.6.1.-]                                         | 6.60E-15 |
| 2572233475 | t3m_01832 | Locus_type     | CDS                                                                            |          |
| 2572233475 | t3m_01832 | Product_name   | ADP-ribose pyrophosphatase                                                     |          |
| 2572233475 | t3m_01832 | Scaffold       | t3m_contig_70_2516_len_5342_read_count_446082.68                               |          |
| 2572233475 | t3m_01832 | Coordinates    | 206..655(+)                                                                    |          |
| 2572233475 | t3m_01832 | DNA_length     | 450bp                                                                          |          |
| 2572233475 | t3m_01832 | Protein_length | 149aa                                                                          |          |
| 2572233475 | t3m_01832 | GC             |                                                                                | 0.69     |
| 2572233476 | t3m_01833 | Locus_type     | CDS                                                                            |          |
| 2572233476 | t3m_01833 | Product_name   | hypothetical protein                                                           |          |
| 2572233476 | t3m_01833 | Scaffold       | t3m_contig_70_2516_len_5342_read_count_446082.68                               |          |
| 2572233476 | t3m_01833 | Coordinates    | 677..1102(-)                                                                   |          |
| 2572233476 | t3m_01833 | DNA_length     | 426bp                                                                          |          |
| 2572233476 | t3m_01833 | Protein_length | 141aa                                                                          |          |
| 2572233476 | t3m_01833 | GC             |                                                                                | 0.7      |
| 2572233477 | t3m_01834 | pfam01866      | Diphthamide_syn                                                                | 1.10E-51 |
| 2572233477 | t3m_01834 | TIGR00322      | diphthamide biosynthesis enzyme Dph1/Dph2 domain                               | 4.30E-45 |
| 2572233477 | t3m_01834 | Locus_type     | CDS                                                                            |          |
| 2572233477 | t3m_01834 | Product_name   | Putative diphthamide synthesis protein                                         |          |
| 2572233477 | t3m_01834 | Scaffold       | t3m_contig_70_2516_len_5342_read_count_446082.68                               |          |

|            |           |                |                                                                          |           |
|------------|-----------|----------------|--------------------------------------------------------------------------|-----------|
| 2572233477 | t3m_01834 | Coordinates    | 1103..1741(+)                                                            |           |
| 2572233477 | t3m_01834 | DNA_length     | 639bp                                                                    |           |
| 2572233477 | t3m_01834 | Protein_length | 212aa                                                                    |           |
| 2572233477 | t3m_01834 | GC             |                                                                          | 0.69      |
| 2572233478 | t3m_01835 | TIGR00304      | TIGR00304 family protein                                                 | 1.80E-11  |
| 2572233478 | t3m_01835 | Locus_type     | CDS                                                                      |           |
| 2572233478 | t3m_01835 | Product_name   | hypothetical protein                                                     |           |
| 2572233478 | t3m_01835 | Scaffold       | t3m_contig_70_2516_len_5342_read_count_446082.68                         |           |
| 2572233478 | t3m_01835 | Coordinates    | 1768..2196(+)                                                            |           |
| 2572233478 | t3m_01835 | DNA_length     | 429bp                                                                    |           |
| 2572233478 | t3m_01835 | Protein_length | 142aa                                                                    |           |
| 2572233478 | t3m_01835 | GC             |                                                                          | 0.69      |
| 2572233478 | t3m_01835 | Transmembrane  | Yes                                                                      |           |
| 2572233479 | t3m_01836 | COG_category   | [H] Coenzyme transport and metabolism                                    |           |
| 2572233479 | t3m_01836 | COG0311        | Predicted glutamine amidotransferase involved in pyridoxine biosynthe    | 4.00E-56  |
| 2572233479 | t3m_01836 | pfam01174      | SNO                                                                      | 2.20E-41  |
| 2572233479 | t3m_01836 | EC:2.6.-       | Transferases. Transferring nitrogenous groups.                           |           |
| 2572233479 | t3m_01836 | TIGR03800      | pyridoxal 5'-phosphate synthase, glutaminase subunit Pdx2                | 3.50E-58  |
| 2572233479 | t3m_01836 | KO:K08681      | glutamine amidotransferase [EC:2.6.-.]                                   | 7.70E-44  |
| 2572233479 | t3m_01836 | Locus_type     | CDS                                                                      |           |
| 2572233479 | t3m_01836 | Product_name   | pyridoxal 5'-phosphate synthase, glutaminase subunit Pdx2                |           |
| 2572233479 | t3m_01836 | Scaffold       | t3m_contig_70_2516_len_5342_read_count_446082.68                         |           |
| 2572233479 | t3m_01836 | Coordinates    | 2156..2794(-)                                                            |           |
| 2572233479 | t3m_01836 | DNA_length     | 639bp                                                                    |           |
| 2572233479 | t3m_01836 | Protein_length | 212aa                                                                    |           |
| 2572233479 | t3m_01836 | GC             |                                                                          | 0.7       |
| 2572233480 | t3m_01837 | Metacyc        | PWY-5074: mevalonate degradation                                         |           |
| 2572233480 | t3m_01837 | IMG_pathway    | 178: Mevalonate pathway for isopentenyl pyrophosphate synthesis          |           |
| 2572233480 | t3m_01837 | IMG_pathway    | 591: Archaeal mevalonate pathway for isopentenyl pyrophosphate synthesis |           |
| 2572233480 | t3m_01837 | COG_category   | [I] Lipid transport and metabolism                                       |           |
| 2572233480 | t3m_01837 | COG1257        | Hydroxymethylglutaryl-CoA reductase                                      | 3.00E-107 |

|            |           |                |                                                                  |          |
|------------|-----------|----------------|------------------------------------------------------------------|----------|
| 2572233480 | t3m_01837 | pfam00368      | HMG-CoA_red                                                      | 6.40E-91 |
| 2572233480 | t3m_01837 | EC:1.1.1.88    | Hydroxymethylglutaryl-CoA reductase.                             |          |
| 2572233480 | t3m_01837 | TIGR00532      | hydroxymethylglutaryl-CoA reductase, degradative                 | 0.00E+00 |
| 2572233480 | t3m_01837 | KO:K00054      | hydroxymethylglutaryl-CoA reductase [EC:1.1.1.88]                | 0.00E+00 |
| 2572233480 | t3m_01837 | ITERM:00463    | 3-hydroxy-3-methylglutaryl-coenzyme A reductase (EC 1.1.1.34)    |          |
| 2572233480 | t3m_01837 | Locus_type     | CDS                                                              |          |
| 2572233480 | t3m_01837 | Product_name   | 3-hydroxy-3-methylglutaryl-coenzyme A reductase (EC 1.1.1.34)    |          |
| 2572233480 | t3m_01837 | Scaffold       | t3m_contig_70_2516_len_5342_read_count_446082.68                 |          |
| 2572233480 | t3m_01837 | Coordinates    | 2791..4095(-)                                                    |          |
| 2572233480 | t3m_01837 | DNA_length     | 1305bp                                                           |          |
| 2572233480 | t3m_01837 | Protein_length | 434aa                                                            |          |
| 2572233480 | t3m_01837 | GC             |                                                                  | 0.67     |
| 2572233481 | t3m_01838 | COG_category   | [O] Posttranslational modification, protein turnover, chaperones |          |
| 2572233481 | t3m_01838 | COG0576        | Molecular chaperone GrpE (heat shock protein)                    | 6.00E-24 |
| 2572233481 | t3m_01838 | pfam01025      | GrpE                                                             | 4.30E-33 |
| 2572233481 | t3m_01838 | KO:K03687      | molecular chaperone GrpE                                         | 1.40E-20 |
| 2572233481 | t3m_01838 | Locus_type     | CDS                                                              |          |
| 2572233481 | t3m_01838 | Product_name   | Molecular chaperone GrpE (heat shock protein)                    |          |
| 2572233481 | t3m_01838 | Scaffold       | t3m_contig_70_2516_len_5342_read_count_446082.68                 |          |
| 2572233481 | t3m_01838 | Coordinates    | 4099..4668(-)                                                    |          |
| 2572233481 | t3m_01838 | DNA_length     | 570bp                                                            |          |
| 2572233481 | t3m_01838 | Protein_length | 189aa                                                            |          |
| 2572233481 | t3m_01838 | GC             |                                                                  | 0.69     |
| 2572233482 | t3m_01839 | pfam02518      | HATPase_c                                                        | 1.30E-12 |
| 2572233482 | t3m_01839 | Locus_type     | CDS                                                              |          |
| 2572233482 | t3m_01839 | Product_name   | Histidine kinase-, DNA gyrase B-, and HSP90-like ATPase          |          |
| 2572233482 | t3m_01839 | Scaffold       | t3m_contig_70_2516_len_5342_read_count_446082.68                 |          |
| 2572233482 | t3m_01839 | Coordinates    | 4989..5339(+)                                                    |          |
| 2572233482 | t3m_01839 | DNA_length     | 351bp                                                            |          |
| 2572233482 | t3m_01839 | Protein_length | 117aa                                                            |          |
| 2572233482 | t3m_01839 | GC             |                                                                  | 0.65     |



|            |           |                |                                                                   |                                                           |           |
|------------|-----------|----------------|-------------------------------------------------------------------|-----------------------------------------------------------|-----------|
| 2572233483 | t3m_01840 | pfam00361      | Oxidored_q1                                                       |                                                           | 1.20E-31  |
| 2572233483 | t3m_01840 | Locus_type     |                                                                   | CDS                                                       |           |
| 2572233483 | t3m_01840 | Product_name   |                                                                   | NADH-Ubiquinone/plastoquinone (complex I), various chains |           |
| 2572233483 | t3m_01840 | Scaffold       |                                                                   | t3m_contig_70_3071_len_4659_read_count_381100.69          |           |
| 2572233483 | t3m_01840 | Coordinates    |                                                                   | 3..1037(-)                                                |           |
| 2572233483 | t3m_01840 | DNA_length     |                                                                   | 1035bp                                                    |           |
| 2572233483 | t3m_01840 | Protein_length |                                                                   | 345aa                                                     |           |
| 2572233483 | t3m_01840 | GC             |                                                                   |                                                           | 0.68      |
| 2572233483 | t3m_01840 | Transmembrane  |                                                                   | Yes                                                       |           |
| 2572233484 | t3m_01841 | KEGG_module    | M00144: NADH:quinone oxidoreductase, prokaryotes                  |                                                           |           |
| 2572233484 | t3m_01841 | Metacyc        | PWY-5083: NAD/NADH phosphorylation and dephosphorylation          |                                                           |           |
| 2572233484 | t3m_01841 | Metacyc        | PWY-4302: aerobic respiration (alternative oxidase pathway)       |                                                           |           |
| 2572233484 | t3m_01841 | Metacyc        | PWY-3781: aerobic respiration (cytochrome c)                      |                                                           |           |
| 2572233484 | t3m_01841 | Metacyc        | PWY-6692: Fe(II) oxidation                                        |                                                           |           |
| 2572233484 | t3m_01841 | Metacyc        | PWY0-1334: NADH to cytochrome <i>bd</i> oxidase electron transfer |                                                           |           |
| 2572233484 | t3m_01841 | Metacyc        | PWY0-1335: NADH to cytochrome <i>bo</i> oxidase electron transfer |                                                           |           |
| 2572233484 | t3m_01841 | COG_category   | [C] Energy production and conversion                              |                                                           |           |
| 2572233484 | t3m_01841 | COG1008        | NADH:ubiquinone oxidoreductase subunit 4 (chain M)                |                                                           | 3.00E-101 |
| 2572233484 | t3m_01841 | pfam00361      | Oxidored_q1                                                       |                                                           | 4.30E-66  |
| 2572233484 | t3m_01841 | EC:1.6.5.3     | NADH:ubiquinone reductase (H(+)-translocating).                   |                                                           |           |
| 2572233484 | t3m_01841 | TIGR01972      | proton-translocating NADH-quinone oxidoreductase, chain M         |                                                           | 0.00E+00  |
| 2572233484 | t3m_01841 | KO:K00342      | NADH-quinone oxidoreductase subunit M [EC:1.6.5.3]                |                                                           | 0.00E+00  |
| 2572233484 | t3m_01841 | Locus_type     |                                                                   | CDS                                                       |           |
| 2572233484 | t3m_01841 | Product_name   |                                                                   | proton-translocating NADH-quinone oxidoreductase, chain M |           |
| 2572233484 | t3m_01841 | Scaffold       |                                                                   | t3m_contig_70_3071_len_4659_read_count_381100.69          |           |
| 2572233484 | t3m_01841 | Coordinates    |                                                                   | 1042..2529(-)                                             |           |
| 2572233484 | t3m_01841 | DNA_length     |                                                                   | 1488bp                                                    |           |
| 2572233484 | t3m_01841 | Protein_length |                                                                   | 495aa                                                     |           |
| 2572233484 | t3m_01841 | GC             |                                                                   |                                                           | 0.67      |
| 2572233484 | t3m_01841 | Transmembrane  |                                                                   | Yes                                                       |           |
| 2572233485 | t3m_01842 | KEGG_module    | M00144: NADH:quinone oxidoreductase, prokaryotes                  |                                                           |           |
| 2572233485 | t3m_01842 | Metacyc        | PWY0-1335: NADH to cytochrome <i>bo</i> oxidase electron transfer |                                                           |           |

|            |           |                |                                                                           |           |
|------------|-----------|----------------|---------------------------------------------------------------------------|-----------|
| 2572233485 | t3m_01842 | Metacyc        | PWY-5083: NAD/NADH phosphorylation and dephosphorylation                  |           |
| 2572233485 | t3m_01842 | Metacyc        | PWY-3781: aerobic respiration (cytochrome c)                              |           |
| 2572233485 | t3m_01842 | Metacyc        | PWY0-1334: NADH to cytochrome c oxidase electron transfer                 |           |
| 2572233485 | t3m_01842 | Metacyc        | PWY-4302: aerobic respiration (alternative oxidase pathway)               |           |
| 2572233485 | t3m_01842 | Metacyc        | PWY-6692: Fe(II) oxidation                                                |           |
| 2572233485 | t3m_01842 | COG_category   | [C] Energy production and conversion                                      |           |
| 2572233485 | t3m_01842 | COG_category   | [P] Inorganic ion transport and metabolism                                |           |
| 2572233485 | t3m_01842 | COG1009        | NADH:ubiquinone oxidoreductase subunit 5 (chain L)/Multisubunit Na+       | 2.00E-112 |
| 2572233485 | t3m_01842 | pfam00361      | Oxidored_q1                                                               | 4.20E-73  |
| 2572233485 | t3m_01842 | pfam00662      | Oxidored_q1_N                                                             | 2.20E-13  |
| 2572233485 | t3m_01842 | EC:1.6.5.3     | NADH:ubiquinone reductase (H(+)-translocating).                           |           |
| 2572233485 | t3m_01842 | TIGR01974      | proton-translocating NADH-quinone oxidoreductase, chain L                 | 0.00E+00  |
| 2572233485 | t3m_01842 | KO:K00341      | NADH-quinone oxidoreductase subunit L [EC:1.6.5.3]                        | 0.00E+00  |
| 2572233485 | t3m_01842 | Locus_type     | CDS                                                                       |           |
| 2572233485 | t3m_01842 | Product_name   | proton-translocating NADH-quinone oxidoreductase, chain L                 |           |
| 2572233485 | t3m_01842 | Scaffold       | t3m_contig_70_3071_len_4659_read_count_381100.69                          |           |
| 2572233485 | t3m_01842 | Coordinates    | 2522..4435(-)                                                             |           |
| 2572233485 | t3m_01842 | DNA_length     | 1914bp                                                                    |           |
| 2572233485 | t3m_01842 | Protein_length | 637aa                                                                     |           |
| 2572233485 | t3m_01842 | GC             |                                                                           | 0.68      |
| 2572233485 | t3m_01842 | Transmembrane  | Yes                                                                       |           |
| 2572233486 | t3m_01843 | Metacyc        | PWY-6545: pyrimidine deoxyribonucleotides <i>de novo</i> biosynthesis III |           |
| 2572233486 | t3m_01843 | COG_category   | [F] Nucleotide transport and metabolism                                   |           |
| 2572233486 | t3m_01843 | COG1351        | Predicted alternative thymidylate synthase                                | 7.00E-45  |
| 2572233486 | t3m_01843 | pfam02511      | Thy1                                                                      | 9.70E-59  |
| 2572233486 | t3m_01843 | EC:2.1.1.148   | Thymidylate synthase (FAD).                                               |           |
| 2572233486 | t3m_01843 | TIGR02170      | thymidylate synthase, flavin-dependent                                    | 2.20E-63  |
| 2572233486 | t3m_01843 | KO:K03465      | thymidylate synthase (FAD) [EC:2.1.1.148]                                 | 0.00E+00  |
| 2572233486 | t3m_01843 | Locus_type     | CDS                                                                       |           |
| 2572233486 | t3m_01843 | Product_name   | Predicted alternative thymidylate synthase                                |           |
| 2572233486 | t3m_01843 | Scaffold       | t3m_contig_70_3526_len_4237_read_count_356275.70                          |           |
| 2572233486 | t3m_01843 | Coordinates    | 130..1035(-)                                                              |           |
| 2572233486 | t3m_01843 | DNA_length     | 906bp                                                                     |           |

|            |           |                |                                                         |           |
|------------|-----------|----------------|---------------------------------------------------------|-----------|
| 2572233486 | t3m_01843 | Protein_length | 301aa                                                   |           |
| 2572233486 | t3m_01843 | GC             |                                                         | 0.67      |
| 2572233487 | t3m_01844 | KEGG_module    | M00360: Aminoacyl-tRNA biosynthesis, prokaryotes        |           |
| 2572233487 | t3m_01844 | KEGG_module    | M00359: Aminoacyl-tRNA biosynthesis, eukaryotes         |           |
| 2572233487 | t3m_01844 | Metacyc        | TRNA-CHARGING-PWY: tRNA charging                        |           |
| 2572233487 | t3m_01844 | IMG_pathway    | 498: L-methionine ligation to tRNA(Met)                 |           |
| 2572233487 | t3m_01844 | COG_category   | [J] Translation, ribosomal structure and biogenesis     |           |
| 2572233487 | t3m_01844 | COG0143        | Methionyl-tRNA synthetase                               | 0.00E+00  |
| 2572233487 | t3m_01844 | pfam09334      | tRNA-synt_1g                                            | 2.60E-127 |
| 2572233487 | t3m_01844 | pfam01588      | tRNA_bind                                               | 2.50E-19  |
| 2572233487 | t3m_01844 | EC:6.1.1.10    | Methionine--tRNA ligase.                                |           |
| 2572233487 | t3m_01844 | TIGR00398      | methionyl-tRNA synthetase                               | 2.60E-129 |
| 2572233487 | t3m_01844 | KO:K01874      | methionyl-tRNA synthetase [EC:6.1.1.10]                 | 0.00E+00  |
| 2572233487 | t3m_01844 | ITERM:00402    | methionyl-tRNA synthetase (EC 6.1.1.10)                 |           |
| 2572233487 | t3m_01844 | Locus_type     | CDS                                                     |           |
| 2572233487 | t3m_01844 | Product_name   | methionyl-tRNA synthetase (EC 6.1.1.10)                 |           |
| 2572233487 | t3m_01844 | Scaffold       | t3m_contig_70_3526_len_4237_read_count_356275.70        |           |
| 2572233487 | t3m_01844 | Coordinates    | 1165..3435(+)                                           |           |
| 2572233487 | t3m_01844 | DNA_length     | 2271bp                                                  |           |
| 2572233487 | t3m_01844 | Protein_length | 756aa                                                   |           |
| 2572233487 | t3m_01844 | GC             |                                                         | 0.69      |
| 2572233488 | t3m_01845 | COG_category   | [R] General function prediction only                    |           |
| 2572233488 | t3m_01845 | COG0613        | Predicted metal-dependent phosphoesterases (PHP family) | 2.00E-16  |
| 2572233488 | t3m_01845 | pfam13263      | PHP_C                                                   | 6.70E-14  |
| 2572233488 | t3m_01845 | pfam02811      | PHP                                                     | 2.70E-09  |
| 2572233488 | t3m_01845 | Locus_type     | CDS                                                     |           |
| 2572233488 | t3m_01845 | Product_name   | Predicted metal-dependent phosphoesterases (PHP family) |           |
| 2572233488 | t3m_01845 | Scaffold       | t3m_contig_70_3526_len_4237_read_count_356275.70        |           |
| 2572233488 | t3m_01845 | Coordinates    | 3435..4112(+)                                           |           |
| 2572233488 | t3m_01845 | DNA_length     | 678bp                                                   |           |
| 2572233488 | t3m_01845 | Protein_length | 225aa                                                   |           |
| 2572233488 | t3m_01845 | GC             |                                                         | 0.71      |

|            |           |                |                                                                |          |
|------------|-----------|----------------|----------------------------------------------------------------|----------|
| 2572233489 | t3m_01846 | Locus_type     | CDS                                                            |          |
| 2572233489 | t3m_01846 | Product_name   | hypothetical protein                                           |          |
| 2572233489 | t3m_01846 | Scaffold       | t3m_contig_70_3763_len_4052_read_count_334737.71               |          |
| 2572233489 | t3m_01846 | Coordinates    | 164..616(-)                                                    |          |
| 2572233489 | t3m_01846 | DNA_length     | 453bp                                                          |          |
| 2572233489 | t3m_01846 | Protein_length | 150aa                                                          |          |
| 2572233489 | t3m_01846 | GC             |                                                                | 0.71     |
| 2572233490 | t3m_01847 | COG_category   | [P] Inorganic ion transport and metabolism                     |          |
| 2572233490 | t3m_01847 | COG0475        | Kef-type K <sup>+</sup> transport systems, membrane components | 5.00E-24 |
| 2572233490 | t3m_01847 | pfam00999      | Na <sub>+</sub> /H <sup>+</sup> Exchanger                      | 2.60E-44 |
| 2572233490 | t3m_01847 | ITERM:06565    | transporter, CPA2 family (TC 2.A.37)                           |          |
| 2572233490 | t3m_01847 | Locus_type     | CDS                                                            |          |
| 2572233490 | t3m_01847 | Product_name   | transporter, CPA2 family (TC 2.A.37)                           |          |
| 2572233490 | t3m_01847 | Scaffold       | t3m_contig_70_3763_len_4052_read_count_334737.71               |          |
| 2572233490 | t3m_01847 | Coordinates    | 809..2128(+)                                                   |          |
| 2572233490 | t3m_01847 | DNA_length     | 1320bp                                                         |          |
| 2572233490 | t3m_01847 | Protein_length | 439aa                                                          |          |
| 2572233490 | t3m_01847 | GC             |                                                                | 0.66     |
| 2572233490 | t3m_01847 | Transmembrane  | Yes                                                            |          |
| 2572233491 | t3m_01848 | COG_category   | [E] Amino acid transport and metabolism                        |          |
| 2572233491 | t3m_01848 | COG0560        | Phosphoserine phosphatase                                      | 2.00E-17 |
| 2572233491 | t3m_01848 | pfam12710      | HAD                                                            | 7.30E-07 |
| 2572233491 | t3m_01848 | Locus_type     | CDS                                                            |          |
| 2572233491 | t3m_01848 | Product_name   | Phosphoserine phosphatase                                      |          |
| 2572233491 | t3m_01848 | Scaffold       | t3m_contig_70_3763_len_4052_read_count_334737.71               |          |
| 2572233491 | t3m_01848 | Coordinates    | 2285..2938(+)                                                  |          |
| 2572233491 | t3m_01848 | DNA_length     | 654bp                                                          |          |
| 2572233491 | t3m_01848 | Protein_length | 217aa                                                          |          |
| 2572233491 | t3m_01848 | GC             |                                                                | 0.69     |
| 2572233492 | t3m_01849 | Locus_type     | CDS                                                            |          |

|            |           |                |                                                  |          |
|------------|-----------|----------------|--------------------------------------------------|----------|
| 2572233492 | t3m_01849 | Product_name   | hypothetical protein                             |          |
| 2572233492 | t3m_01849 | Scaffold       | t3m_contig_70_3763_len_4052_read_count_334737.71 |          |
| 2572233492 | t3m_01849 | Coordinates    | 2999..3577(+)                                    |          |
| 2572233492 | t3m_01849 | DNA_length     | 579bp                                            |          |
| 2572233492 | t3m_01849 | Protein_length | 192aa                                            |          |
| 2572233492 | t3m_01849 | GC             |                                                  | 0.7      |
|            |           |                |                                                  |          |
| 2572233493 | t3m_01850 | Locus_type     | CDS                                              |          |
| 2572233493 | t3m_01850 | Product_name   | hypothetical protein                             |          |
| 2572233493 | t3m_01850 | Scaffold       | t3m_contig_70_3763_len_4052_read_count_334737.71 |          |
| 2572233493 | t3m_01850 | Coordinates    | 3865..4050(+)                                    |          |
| 2572233493 | t3m_01850 | DNA_length     | 186bp                                            |          |
| 2572233493 | t3m_01850 | Protein_length | 62aa                                             |          |
| 2572233493 | t3m_01850 | GC             |                                                  | 0.65     |
|            |           |                |                                                  |          |
| 2572233494 | t3m_01851 | pfam06418      | CTP_synth_N                                      | 2.20E-42 |
| 2572233494 | t3m_01851 | Locus_type     | CDS                                              |          |
| 2572233494 | t3m_01851 | Product_name   | CTP synthase N-terminus                          |          |
| 2572233494 | t3m_01851 | Scaffold       | t3m_contig_70_3977_len_3906_read_count_317865.72 |          |
| 2572233494 | t3m_01851 | Coordinates    | 2..232(-)                                        |          |
| 2572233494 | t3m_01851 | DNA_length     | 231bp                                            |          |
| 2572233494 | t3m_01851 | Protein_length | 77aa                                             |          |
| 2572233494 | t3m_01851 | GC             |                                                  | 0.65     |
|            |           |                |                                                  |          |
| 2572233495 | t3m_01852 | COG_category   | [L] Replication, recombination and repair        |          |
| 2572233495 | t3m_01852 | COG0675        | Transposase and inactivated derivatives          | 2.00E-15 |
| 2572233495 | t3m_01852 | pfam07282      | OrfB_Zn_ribbon                                   | 1.40E-19 |
| 2572233495 | t3m_01852 | TIGR01766      | transposase, IS605 OrfB family, central region   | 1.10E-11 |
| 2572233495 | t3m_01852 | KO:K07496      | putative transposase                             | 1.00E-23 |
| 2572233495 | t3m_01852 | Locus_type     | CDS                                              |          |
| 2572233495 | t3m_01852 | Product_name   | Transposase and inactivated derivatives          |          |
| 2572233495 | t3m_01852 | Scaffold       | t3m_contig_70_3977_len_3906_read_count_317865.72 |          |
| 2572233495 | t3m_01852 | Coordinates    | 643..1776(+)                                     |          |
| 2572233495 | t3m_01852 | DNA_length     | 1134bp                                           |          |

|            |           |                |                                                                       |          |
|------------|-----------|----------------|-----------------------------------------------------------------------|----------|
| 2572233495 | t3m_01852 | Protein_length | 377aa                                                                 |          |
| 2572233495 | t3m_01852 | GC             |                                                                       | 0.64     |
| 2572233496 | t3m_01853 | COG_category   | [H] Coenzyme transport and metabolism                                 |          |
| 2572233496 | t3m_01853 | COG_category   | [C] Energy production and conversion                                  |          |
| 2572233496 | t3m_01853 | COG0543        | 2-polyprenylphenol hydroxylase and related flavodoxin oxidoreductase: | 3.00E-41 |
| 2572233496 | t3m_01853 | pfam10418      | DHODB_Fe-S_bind                                                       | 7.20E-12 |
| 2572233496 | t3m_01853 | pfam00970      | FAD_binding_6                                                         | 2.30E-05 |
| 2572233496 | t3m_01853 | pfam00175      | NAD_binding_1                                                         | 1.40E-09 |
| 2572233496 | t3m_01853 | KO:K02823      | dihydroorotate dehydrogenase electron transfer subunit                | 0.00E+00 |
| 2572233496 | t3m_01853 | Locus_type     | CDS                                                                   |          |
| 2572233496 | t3m_01853 | Product_name   | 2-polyprenylphenol hydroxylase and related flavodoxin oxidoreductases |          |
| 2572233496 | t3m_01853 | Scaffold       | t3m_contig_70_3977_len_3906_read_count_317865.72                      |          |
| 2572233496 | t3m_01853 | Coordinates    | 1844..2620(-)                                                         |          |
| 2572233496 | t3m_01853 | DNA_length     | 777bp                                                                 |          |
| 2572233496 | t3m_01853 | Protein_length | 258aa                                                                 |          |
| 2572233496 | t3m_01853 | GC             |                                                                       | 0.7      |
| 2572233497 | t3m_01854 | KEGG_module    | M00051: Uridine monophosphate biosynthesis, glutamine (+ PRPP) => UMP |          |
| 2572233497 | t3m_01854 | COG_category   | [F] Nucleotide transport and metabolism                               |          |
| 2572233497 | t3m_01854 | COG0167        | Dihydroorotate dehydrogenase                                          | 3.00E-69 |
| 2572233497 | t3m_01854 | pfam01180      | DHO_dh                                                                | 2.10E-57 |
| 2572233497 | t3m_01854 | EC:1.3.98.1    | Dihydroorotate oxidase (fumarate).                                    |          |
| 2572233497 | t3m_01854 | TIGR01037      | dihydroorotate dehydrogenase (subfamily 1) family protein             | 8.30E-99 |
| 2572233497 | t3m_01854 | KO:K00226      | dihydroorotate dehydrogenase (fumarate) [EC:1.3.98.1]                 | 0.00E+00 |
| 2572233497 | t3m_01854 | Locus_type     | CDS                                                                   |          |
| 2572233497 | t3m_01854 | Product_name   | dihydroorotate oxidase B, catalytic subunit (EC 1.3.3.1)              |          |
| 2572233497 | t3m_01854 | Scaffold       | t3m_contig_70_3977_len_3906_read_count_317865.72                      |          |
| 2572233497 | t3m_01854 | Coordinates    | 2679..3611(-)                                                         |          |
| 2572233497 | t3m_01854 | DNA_length     | 933bp                                                                 |          |
| 2572233497 | t3m_01854 | Protein_length | 310aa                                                                 |          |
| 2572233497 | t3m_01854 | GC             |                                                                       | 0.71     |
| 2572233498 | t3m_01855 | pfam02861      | Clp_N                                                                 | 1.00E-11 |

|            |           |                |                                                            |                                                                  |          |
|------------|-----------|----------------|------------------------------------------------------------|------------------------------------------------------------------|----------|
| 2572233498 | t3m_01855 | Locus_type     |                                                            | CDS                                                              |          |
| 2572233498 | t3m_01855 | Product_name   |                                                            | Clp amino terminal domain                                        |          |
| 2572233498 | t3m_01855 | Scaffold       |                                                            | t3m_contig_70_3977_len_3906_read_count_317865.72                 |          |
| 2572233498 | t3m_01855 | Coordinates    |                                                            | 3667..3903(+)                                                    |          |
| 2572233498 | t3m_01855 | DNA_length     |                                                            | 237bp                                                            |          |
| 2572233498 | t3m_01855 | Protein_length |                                                            | 79aa                                                             |          |
| 2572233498 | t3m_01855 | GC             |                                                            |                                                                  | 0.73     |
| 2572233499 | t3m_01856 | pfam00496      | SBP_bac_5                                                  |                                                                  | 2.00E-05 |
| 2572233499 | t3m_01856 | Locus_type     |                                                            | CDS                                                              |          |
| 2572233499 | t3m_01856 | Product_name   |                                                            | Bacterial extracellular solute-binding proteins, family 5 Middle |          |
| 2572233499 | t3m_01856 | Scaffold       |                                                            | t3m_contig_70_4636_len_3511_read_count_360663.73                 |          |
| 2572233499 | t3m_01856 | Coordinates    |                                                            | 3..590(-)                                                        |          |
| 2572233499 | t3m_01856 | DNA_length     |                                                            | 588bp                                                            |          |
| 2572233499 | t3m_01856 | Protein_length |                                                            | 196aa                                                            |          |
| 2572233499 | t3m_01856 | GC             |                                                            |                                                                  | 0.64     |
| 2572233499 | t3m_01856 | Transmembrane  |                                                            | Yes                                                              |          |
| 2572233500 | t3m_01857 | COG_category   | [E] Amino acid transport and metabolism                    |                                                                  |          |
| 2572233500 | t3m_01857 | COG1748        | Saccharopine dehydrogenase and related proteins            |                                                                  | 7.00E-43 |
| 2572233500 | t3m_01857 | pfam03435      | Saccharop_dh                                               |                                                                  | 5.50E-41 |
| 2572233500 | t3m_01857 | Locus_type     |                                                            | CDS                                                              |          |
| 2572233500 | t3m_01857 | Product_name   |                                                            | Saccharopine dehydrogenase and related proteins                  |          |
| 2572233500 | t3m_01857 | Scaffold       |                                                            | t3m_contig_70_4636_len_3511_read_count_360663.73                 |          |
| 2572233500 | t3m_01857 | Coordinates    |                                                            | 900..1976(+)                                                     |          |
| 2572233500 | t3m_01857 | DNA_length     |                                                            | 1077bp                                                           |          |
| 2572233500 | t3m_01857 | Protein_length |                                                            | 358aa                                                            |          |
| 2572233500 | t3m_01857 | GC             |                                                            |                                                                  | 0.69     |
| 2572233501 | t3m_01858 | COG_category   | [E] Amino acid transport and metabolism                    |                                                                  |          |
| 2572233501 | t3m_01858 | COG0747        | ABC-type dipeptide transport system, periplasmic component |                                                                  | 8.00E-23 |
| 2572233501 | t3m_01858 | pfam00496      | SBP_bac_5                                                  |                                                                  | 3.60E-28 |
| 2572233501 | t3m_01858 | Locus_type     |                                                            | CDS                                                              |          |
| 2572233501 | t3m_01858 | Product_name   |                                                            | Bacterial extracellular solute-binding proteins, family 5 Middle |          |

|            |           |                |                                                                            |          |
|------------|-----------|----------------|----------------------------------------------------------------------------|----------|
| 2572233501 | t3m_01858 | Scaffold       | t3m_contig_70_4636_len_3511_read_count_360663.73                           |          |
| 2572233501 | t3m_01858 | Coordinates    | 2140..3510(-)                                                              |          |
| 2572233501 | t3m_01858 | DNA_length     | 1371bp                                                                     |          |
| 2572233501 | t3m_01858 | Protein_length | 456aa                                                                      |          |
| 2572233501 | t3m_01858 | GC             |                                                                            | 0.64     |
|            |           |                |                                                                            |          |
| 2572233502 | t3m_01859 | TIGR02179      | 2-oxoacid:acceptor oxidoreductase, delta subunit, pyruvate/2-ketoisov:     | 4.10E-23 |
| 2572233502 | t3m_01859 | Locus_type     | CDS                                                                        |          |
| 2572233502 | t3m_01859 | Product_name   | hypothetical protein                                                       |          |
| 2572233502 | t3m_01859 | Scaffold       | t3m_contig_70_7868_len_2417_read_count_208576.74                           |          |
| 2572233502 | t3m_01859 | Coordinates    | 1..156(+)                                                                  |          |
| 2572233502 | t3m_01859 | DNA_length     | 156bp                                                                      |          |
| 2572233502 | t3m_01859 | Protein_length | 51aa                                                                       |          |
| 2572233502 | t3m_01859 | GC             |                                                                            | 0.58     |
|            |           |                |                                                                            |          |
| 2572233503 | t3m_01860 | KEGG_module    | M00310: Pyruvate:ferredoxin oxidoreductase                                 |          |
| 2572233503 | t3m_01860 | KEGG_module    | M00307: Pyruvate oxidation, pyruvate => acetyl-CoA                         |          |
| 2572233503 | t3m_01860 | KEGG_module    | M00173: Reductive citric acid cycle (Arnon-Buchanan cycle)                 |          |
| 2572233503 | t3m_01860 | KEGG_module    | M00374: Dicarboxylate-hydroxybutyrate cycle                                |          |
| 2572233503 | t3m_01860 | Metacyc        | PWY-7003: glycerol degradation to butanol                                  |          |
| 2572233503 | t3m_01860 | Metacyc        | PWY-6863: pyruvate fermentation to hexanol                                 |          |
| 2572233503 | t3m_01860 | Metacyc        | PWY-6588: pyruvate fermentation to acetone                                 |          |
| 2572233503 | t3m_01860 | Metacyc        | PWY-5392: reductive TCA cycle II                                           |          |
| 2572233503 | t3m_01860 | Metacyc        | PWY-5493: reductive monocarboxylic acid cycle                              |          |
| 2572233503 | t3m_01860 | Metacyc        | PWY-6142: gluconeogenesis II (<i>Methanobacterium thermoautotrophicum</i>) |          |
| 2572233503 | t3m_01860 | Metacyc        | PWY-5538: pyruvate fermentation to acetate VI                              |          |
| 2572233503 | t3m_01860 | Metacyc        | PWY-5483: pyruvate fermentation to acetate III                             |          |
| 2572233503 | t3m_01860 | Metacyc        | P23-PWY: reductive TCA cycle I                                             |          |
| 2572233503 | t3m_01860 | Metacyc        | PWY-5600: pyruvate fermentation to acetate VII                             |          |
| 2572233503 | t3m_01860 | Metacyc        | P142-PWY: pyruvate fermentation to acetate I                               |          |
| 2572233503 | t3m_01860 | Metacyc        | NPGLUCAT-PWY: Entner-Doudoroff pathway II (non-phosphorylative)            |          |
| 2572233503 | t3m_01860 | Metacyc        | CENTFERM-PWY: pyruvate fermentation to butanoate                           |          |
| 2572233503 | t3m_01860 | Metacyc        | PWY-6583: pyruvate fermentation to butanol I                               |          |
| 2572233503 | t3m_01860 | Metacyc        | PWY-6876: isopropanol biosynthesis                                         |          |



|            |           |                |                                                                            |          |
|------------|-----------|----------------|----------------------------------------------------------------------------|----------|
| 2572233503 | t3m_01860 | Metacyc        | PWY-6587: pyruvate fermentation to ethanol III                             |          |
| 2572233503 | t3m_01860 | Metacyc        | GLUDEG-II-PWY: glutamate degradation VII (to butanoate)                    |          |
| 2572233503 | t3m_01860 | Metacyc        | PWY-5497: purine nucleobases degradation II (anaerobic)                    |          |
| 2572233503 | t3m_01860 | Metacyc        | P42-PWY: incomplete reductive TCA cycle                                    |          |
| 2572233503 | t3m_01860 | COG_category   | [C] Energy production and conversion                                       |          |
| 2572233503 | t3m_01860 | COG0674        | Pyruvate:ferredoxin oxidoreductase and related 2-oxoacid:ferredoxin o      | 8.00E-76 |
| 2572233503 | t3m_01860 | pfam01855      | POR_N                                                                      | 2.90E-65 |
| 2572233503 | t3m_01860 | EC:1.2.7.1     | Pyruvate synthase.                                                         |          |
| 2572233503 | t3m_01860 | KO:K00169      | pyruvate ferredoxin oxidoreductase, alpha subunit [EC:1.2.7.1]             | 0.00E+00 |
| 2572233503 | t3m_01860 | Locus_type     | CDS                                                                        |          |
| 2572233503 | t3m_01860 | Product_name   | Pyruvate:ferredoxin oxidoreductase and related 2-oxoacid:ferredoxin ox     |          |
| 2572233503 | t3m_01860 | Scaffold       | t3m_contig_70_7868_len_2417_read_count_208576.74                           |          |
| 2572233503 | t3m_01860 | Coordinates    | 170..1348(+)                                                               |          |
| 2572233503 | t3m_01860 | DNA_length     | 1179bp                                                                     |          |
| 2572233503 | t3m_01860 | Protein_length | 392aa                                                                      |          |
| 2572233503 | t3m_01860 | GC             |                                                                            | 0.68     |
| 2572233504 | t3m_01861 | KEGG_module    | M00310: Pyruvate:ferredoxin oxidoreductase                                 |          |
| 2572233504 | t3m_01861 | KEGG_module    | M00173: Reductive citric acid cycle (Arnon-Buchanan cycle)                 |          |
| 2572233504 | t3m_01861 | KEGG_module    | M00374: Dicarboxylate-hydroxybutyrate cycle                                |          |
| 2572233504 | t3m_01861 | KEGG_module    | M00307: Pyruvate oxidation, pyruvate => acetyl-CoA                         |          |
| 2572233504 | t3m_01861 | Metacyc        | PWY-6863: pyruvate fermentation to hexanol                                 |          |
| 2572233504 | t3m_01861 | Metacyc        | PWY-6587: pyruvate fermentation to ethanol III                             |          |
| 2572233504 | t3m_01861 | Metacyc        | PWY-6876: isopropanol biosynthesis                                         |          |
| 2572233504 | t3m_01861 | Metacyc        | PWY-6583: pyruvate fermentation to butanol I                               |          |
| 2572233504 | t3m_01861 | Metacyc        | PWY-5392: reductive TCA cycle II                                           |          |
| 2572233504 | t3m_01861 | Metacyc        | PWY-7003: glycerol degradation to butanol                                  |          |
| 2572233504 | t3m_01861 | Metacyc        | CENTFERM-PWY: pyruvate fermentation to butanoate                           |          |
| 2572233504 | t3m_01861 | Metacyc        | PWY-6142: gluconeogenesis II (<i>Methanobacterium thermoautotrophicum</i>) |          |
| 2572233504 | t3m_01861 | Metacyc        | PWY-5600: pyruvate fermentation to acetate VII                             |          |
| 2572233504 | t3m_01861 | Metacyc        | P142-PWY: pyruvate fermentation to acetate I                               |          |
| 2572233504 | t3m_01861 | Metacyc        | NPGLUCAT-PWY: Entner-Doudoroff pathway II (non-phosphorylative)            |          |
| 2572233504 | t3m_01861 | Metacyc        | PWY-5483: pyruvate fermentation to acetate III                             |          |
| 2572233504 | t3m_01861 | Metacyc        | PWY-5493: reductive monocarboxylic acid cycle                              |          |

|            |           |                |                                                                       |          |
|------------|-----------|----------------|-----------------------------------------------------------------------|----------|
| 2572233504 | t3m_01861 | Metacyc        | P23-PWY: reductive TCA cycle I                                        |          |
| 2572233504 | t3m_01861 | Metacyc        | P42-PWY: incomplete reductive TCA cycle                               |          |
| 2572233504 | t3m_01861 | Metacyc        | PWY-5497: purine nucleobases degradation II (anaerobic)               |          |
| 2572233504 | t3m_01861 | Metacyc        | PWY-6588: pyruvate fermentation to acetone                            |          |
| 2572233504 | t3m_01861 | Metacyc        | PWY-5538: pyruvate fermentation to acetate VI                         |          |
| 2572233504 | t3m_01861 | Metacyc        | GLUDEG-II-PWY: glutamate degradation VII (to butanoate)               |          |
| 2572233504 | t3m_01861 | COG_category   | [C] Energy production and conversion                                  |          |
| 2572233504 | t3m_01861 | COG1013        | Pyruvate:ferredoxin oxidoreductase and related 2-oxoacid:ferredoxin o | 1.00E-61 |
| 2572233504 | t3m_01861 | pfam02775      | TPP_enzyme_C                                                          | 1.50E-18 |
| 2572233504 | t3m_01861 | EC:1.2.7.1     | Pyruvate synthase.                                                    |          |
| 2572233504 | t3m_01861 | KO:K00170      | pyruvate ferredoxin oxidoreductase, beta subunit [EC:1.2.7.1]         | 0.00E+00 |
| 2572233504 | t3m_01861 | Locus_type     | CDS                                                                   |          |
| 2572233504 | t3m_01861 | Product_name   | ketoisovalerate ferredoxin oxidoreductase, beta subunit (EC 1.2.7.7)  |          |
| 2572233504 | t3m_01861 | Scaffold       | t3m_contig_70_7868_len_2417_read_count_208576.74                      |          |
| 2572233504 | t3m_01861 | Coordinates    | 1341..2285(+)                                                         |          |
| 2572233504 | t3m_01861 | DNA_length     | 945bp                                                                 |          |
| 2572233504 | t3m_01861 | Protein_length | 314aa                                                                 |          |
| 2572233504 | t3m_01861 | GC             |                                                                       | 0.69     |
|            |           |                |                                                                       |          |
| 2572233505 | t3m_01862 | Locus_type     | tRNA                                                                  |          |
| 2572233505 | t3m_01862 | Product_name   | tRNA_Met_CAT                                                          |          |
| 2572233505 | t3m_01862 | Scaffold       | t3m_contig_70_7868_len_2417_read_count_208576.74                      |          |
| 2572233505 | t3m_01862 | Coordinates    | 2313..2415(+)                                                         |          |
| 2572233505 | t3m_01862 | DNA_length     | 103bp                                                                 |          |
| 2572233505 | t3m_01862 | GC             |                                                                       | 0.6      |
