# Supplementary material
Source: PubMed Central journal article supplement (PMC4817634)
Supplement: ismej201577x3.pdf [file ismej201577x3.pdf]

Supplementary information of genes annotated for the Fn1 genome

| gene_oid   | Locus Tag   | Source         | Cluster Information                                   | Gene Information                                      | E-value  |
|------------|-------------|----------------|-------------------------------------------------------|-------------------------------------------------------|----------|
| 2558669333 | DRAFT_00001 | Locus_type     |                                                       | CDS                                                   |          |
| 2558669333 | DRAFT_00001 | Product_name   |                                                       | hypothetical protein                                  |          |
| 2558669333 | DRAFT_00001 | Scaffold       |                                                       | DRAFT_contig_70_5_len_108223_read_count_1902626.1     |          |
| 2558669333 | DRAFT_00001 | Coordinates    |                                                       | 3..302(-)                                             |          |
| 2558669333 | DRAFT_00001 | DNA_length     |                                                       | 300bp                                                 |          |
| 2558669333 | DRAFT_00001 | Protein_length |                                                       | 100aa                                                 |          |
| 2558669333 | DRAFT_00001 | GC             |                                                       |                                                       | 0.62     |
| 2558669333 | DRAFT_00001 | Transmembrane  |                                                       | Yes                                                   |          |
| 2558669334 | DRAFT_00002 | KEGG_module    | M00254: ABC-2 type transport system                   |                                                       |          |
| 2558669334 | DRAFT_00002 | COG_category   | [V] Defense mechanisms                                |                                                       |          |
| 2558669334 | DRAFT_00002 | COG1131        | ABC-type multidrug transport system, ATPase component |                                                       | 1.00E-58 |
| 2558669334 | DRAFT_00002 | pfam00005      | ABC_tran                                              |                                                       | 1.20E-25 |
| 2558669334 | DRAFT_00002 | KO:K01990      | ABC-2 type transport system ATP-binding protein       |                                                       | 0.00E+00 |
| 2558669334 | DRAFT_00002 | Locus_type     |                                                       | CDS                                                   |          |
| 2558669334 | DRAFT_00002 | Product_name   |                                                       | ABC-type multidrug transport system, ATPase component |          |
| 2558669334 | DRAFT_00002 | Scaffold       |                                                       | DRAFT_contig_70_5_len_108223_read_count_1902626.1     |          |
| 2558669334 | DRAFT_00002 | Coordinates    |                                                       | 299..1240(-)                                          |          |
| 2558669334 | DRAFT_00002 | DNA_length     |                                                       | 942bp                                                 |          |
| 2558669334 | DRAFT_00002 | Protein_length |                                                       | 313aa                                                 |          |
| 2558669334 | DRAFT_00002 | GC             |                                                       |                                                       | 0.63     |
| 2558669335 | DRAFT_00003 | Locus_type     |                                                       | CDS                                                   |          |
| 2558669335 | DRAFT_00003 | Product_name   |                                                       | hypothetical protein                                  |          |
| 2558669335 | DRAFT_00003 | Scaffold       |                                                       | DRAFT_contig_70_5_len_108223_read_count_1902626.1     |          |
| 2558669335 | DRAFT_00003 | Coordinates    |                                                       | 1770..2261(+)                                         |          |
| 2558669335 | DRAFT_00003 | DNA_length     |                                                       | 492bp                                                 |          |
| 2558669335 | DRAFT_00003 | Protein_length |                                                       | 163aa                                                 |          |
| 2558669335 | DRAFT_00003 | GC             |                                                       |                                                       | 0.46     |
| 2558669336 | DRAFT_00004 | Locus_type     |                                                       | CDS                                                   |          |

|            |             |                |                                                                  |          |
|------------|-------------|----------------|------------------------------------------------------------------|----------|
| 2558669336 | DRAFT_00004 | Product_name   | hypothetical protein                                             |          |
| 2558669336 | DRAFT_00004 | Scaffold       | DRAFT_contig_70_5_len_108223_read_count_1902626.1                |          |
| 2558669336 | DRAFT_00004 | Coordinates    | 2258..2431(+)                                                    |          |
| 2558669336 | DRAFT_00004 | DNA_length     | 174bp                                                            |          |
| 2558669336 | DRAFT_00004 | Protein_length | 57aa                                                             |          |
| 2558669336 | DRAFT_00004 | GC             |                                                                  | 0.53     |
| 2558669337 | DRAFT_00005 | pfam08445      | FR47                                                             | 3.70E-09 |
| 2558669337 | DRAFT_00005 | Locus_type     | CDS                                                              |          |
| 2558669337 | DRAFT_00005 | Product_name   | Predicted acetyltransferase                                      |          |
| 2558669337 | DRAFT_00005 | Scaffold       | DRAFT_contig_70_5_len_108223_read_count_1902626.1                |          |
| 2558669337 | DRAFT_00005 | Coordinates    | 2446..3198(+)                                                    |          |
| 2558669337 | DRAFT_00005 | DNA_length     | 753bp                                                            |          |
| 2558669337 | DRAFT_00005 | Protein_length | 250aa                                                            |          |
| 2558669337 | DRAFT_00005 | GC             |                                                                  | 0.45     |
| 2558669338 | DRAFT_00006 | COG_category   | [O] Posttranslational modification, protein turnover, chaperones |          |
| 2558669338 | DRAFT_00006 | COG2020        | Putative protein-S-isoprenylcysteine methyltransferase           | 7.00E-14 |
| 2558669338 | DRAFT_00006 | pfam04191      | PEMT                                                             | 9.20E-12 |
| 2558669338 | DRAFT_00006 | Locus_type     | CDS                                                              |          |
| 2558669338 | DRAFT_00006 | Product_name   | Putative protein-S-isoprenylcysteine methyltransferase           |          |
| 2558669338 | DRAFT_00006 | Scaffold       | DRAFT_contig_70_5_len_108223_read_count_1902626.1                |          |
| 2558669338 | DRAFT_00006 | Coordinates    | 3253..3876(-)                                                    |          |
| 2558669338 | DRAFT_00006 | DNA_length     | 624bp                                                            |          |
| 2558669338 | DRAFT_00006 | Protein_length | 207aa                                                            |          |
| 2558669338 | DRAFT_00006 | GC             |                                                                  | 0.53     |
| 2558669338 | DRAFT_00006 | Transmembrane  | Yes                                                              |          |
| 2558669339 | DRAFT_00007 | Locus_type     | CDS                                                              |          |
| 2558669339 | DRAFT_00007 | Product_name   | hypothetical protein                                             |          |
| 2558669339 | DRAFT_00007 | Scaffold       | DRAFT_contig_70_5_len_108223_read_count_1902626.1                |          |
| 2558669339 | DRAFT_00007 | Coordinates    | 3968..4246(-)                                                    |          |
| 2558669339 | DRAFT_00007 | DNA_length     | 279bp                                                            |          |
| 2558669339 | DRAFT_00007 | Protein_length | 92aa                                                             |          |

|            |             |                |                                                                               |           |
|------------|-------------|----------------|-------------------------------------------------------------------------------|-----------|
| 2558669339 | DRAFT_00007 | GC             |                                                                               | 0.5       |
| 2558669339 | DRAFT_00007 | Transmembrane  | Yes                                                                           |           |
| 2558669340 | DRAFT_00008 | KEGG_module    | M00425: H/ACA ribonucleoprotein complex                                       |           |
| 2558669340 | DRAFT_00008 | Metacyc        | RIBOKIN-PWY: ribose degradation                                               |           |
| 2558669340 | DRAFT_00008 | COG_category   | [J] Translation, ribosomal structure and biogenesis                           |           |
| 2558669340 | DRAFT_00008 | COG0130        | Pseudouridine synthase                                                        | 4.00E-61  |
| 2558669340 | DRAFT_00008 | pfam08068      | DKCLD                                                                         | 7.60E-13  |
| 2558669340 | DRAFT_00008 | pfam01472      | PUA                                                                           | 1.70E-17  |
| 2558669340 | DRAFT_00008 | pfam01509      | TruB_N                                                                        | 9.20E-18  |
| 2558669340 | DRAFT_00008 | EC:5.4.99.-    | Isomerases. Intramolecular transferases (mutases). Transferring other groups. |           |
| 2558669340 | DRAFT_00008 | TIGR00425      | rRNA pseudouridine synthase, putative                                         | 3.90E-114 |
| 2558669340 | DRAFT_00008 | TIGR00431      | tRNA pseudouridine(55) synthase                                               | 5.30E-20  |
| 2558669340 | DRAFT_00008 | TIGR00451      | uncharacterized domain 2                                                      | 8.40E-10  |
| 2558669340 | DRAFT_00008 | KO:K11131      | H/ACA ribonucleoprotein complex subunit 4 [EC:5.4.99.-]                       | 0.00E+00  |
| 2558669340 | DRAFT_00008 | Locus_type     | CDS                                                                           |           |
| 2558669340 | DRAFT_00008 | Product_name   | tRNA pseudouridine synthase B (EC 4.2.1.70)                                   |           |
| 2558669340 | DRAFT_00008 | Scaffold       | DRAFT_contig_70_5_len_108223_read_count_1902626.1                             |           |
| 2558669340 | DRAFT_00008 | Coordinates    | 4329..5303(-)                                                                 |           |
| 2558669340 | DRAFT_00008 | DNA_length     | 975bp                                                                         |           |
| 2558669340 | DRAFT_00008 | Protein_length | 324aa                                                                         |           |
| 2558669340 | DRAFT_00008 | GC             |                                                                               | 0.58      |
| 2558669341 | DRAFT_00009 | KEGG_module    | M00052: Pyrimidine ribonucleotide biosynthesis, UMP => UDP/UTP,CDP/CTP        |           |
| 2558669341 | DRAFT_00009 | COG_category   | [F] Nucleotide transport and metabolism                                       |           |
| 2558669341 | DRAFT_00009 | COG1102        | Cytidylate kinase                                                             | 1.00E-28  |
| 2558669341 | DRAFT_00009 | pfam13189      | Cytidylate_kin2                                                               | 2.70E-12  |
| 2558669341 | DRAFT_00009 | EC:2.7.4.14    | UMP/CMP kinase.                                                               |           |
| 2558669341 | DRAFT_00009 | TIGR02173      | cytidylate kinase, putative                                                   | 2.30E-32  |
| 2558669341 | DRAFT_00009 | KO:K00945      | cytidylate kinase [EC:2.7.4.14]                                               | 1.40E-45  |
| 2558669341 | DRAFT_00009 | Locus_type     | CDS                                                                           |           |
| 2558669341 | DRAFT_00009 | Product_name   | Cytidylate kinase                                                             |           |
| 2558669341 | DRAFT_00009 | Scaffold       | DRAFT_contig_70_5_len_108223_read_count_1902626.1                             |           |
| 2558669341 | DRAFT_00009 | Coordinates    | 5320..5880(-)                                                                 |           |

|            |             |                |                                                                   |          |
|------------|-------------|----------------|-------------------------------------------------------------------|----------|
| 2558669341 | DRAFT_00009 | DNA_length     | 561bp                                                             |          |
| 2558669341 | DRAFT_00009 | Protein_length | 186aa                                                             |          |
| 2558669341 | DRAFT_00009 | GC             |                                                                   | 0.56     |
| 2558669342 | DRAFT_00010 | COG_category   | [S] Function unknown                                              |          |
| 2558669342 | DRAFT_00010 | COG1422        | Predicted membrane protein                                        | 8.00E-19 |
| 2558669342 | DRAFT_00010 | pfam01956      | DUF106                                                            | 3.20E-13 |
| 2558669342 | DRAFT_00010 | Locus_type     | CDS                                                               |          |
| 2558669342 | DRAFT_00010 | Product_name   | Predicted membrane protein                                        |          |
| 2558669342 | DRAFT_00010 | Scaffold       | DRAFT_contig_70_5_len_108223_read_count_1902626.1                 |          |
| 2558669342 | DRAFT_00010 | Coordinates    | 5894..6826(-)                                                     |          |
| 2558669342 | DRAFT_00010 | DNA_length     | 933bp                                                             |          |
| 2558669342 | DRAFT_00010 | Protein_length | 310aa                                                             |          |
| 2558669342 | DRAFT_00010 | GC             |                                                                   | 0.56     |
| 2558669342 | DRAFT_00010 | Transmembrane  | Yes                                                               |          |
| 2558669343 | DRAFT_00011 | KEGG_module    | M00049: Adenine ribonucleotide biosynthesis, IMP => ADP,ATP       |          |
| 2558669343 | DRAFT_00011 | Metacyc        | PWY-6126: adenosine nucleotides <i>de novo</i> biosynthesis       |          |
| 2558669343 | DRAFT_00011 | COG_category   | [F] Nucleotide transport and metabolism                           |          |
| 2558669343 | DRAFT_00011 | COG2019        | Archaeal adenylate kinase                                         | 4.00E-43 |
| 2558669343 | DRAFT_00011 | pfam13238      | AAA_18                                                            | 4.40E-12 |
| 2558669343 | DRAFT_00011 | EC:2.7.4.3     | Adenylate kinase.                                                 |          |
| 2558669343 | DRAFT_00011 | KO:K00939      | adenylate kinase [EC:2.7.4.3]                                     | 5.60E-42 |
| 2558669343 | DRAFT_00011 | Locus_type     | CDS                                                               |          |
| 2558669343 | DRAFT_00011 | Product_name   | Archaeal adenylate kinase                                         |          |
| 2558669343 | DRAFT_00011 | Scaffold       | DRAFT_contig_70_5_len_108223_read_count_1902626.1                 |          |
| 2558669343 | DRAFT_00011 | Coordinates    | 6796..7395(-)                                                     |          |
| 2558669343 | DRAFT_00011 | DNA_length     | 600bp                                                             |          |
| 2558669343 | DRAFT_00011 | Protein_length | 199aa                                                             |          |
| 2558669343 | DRAFT_00011 | GC             |                                                                   | 0.58     |
| 2558669344 | DRAFT_00012 | KEGG_module    | M00335: Sec (secretion) system                                    |          |
| 2558669344 | DRAFT_00012 | COG_category   | [U] Intracellular trafficking, secretion, and vesicular transport |          |
| 2558669344 | DRAFT_00012 | COG0201        | Preprotein translocase subunit SecY                               | 1.00E-54 |

|            |             |                |                                                     |          |
|------------|-------------|----------------|-----------------------------------------------------|----------|
| 2558669344 | DRAFT_00012 | pfam00344      | SecY                                                | 1.40E-83 |
| 2558669344 | DRAFT_00012 | pfam10559      | Plug_translocon                                     | 2.00E-09 |
| 2558669344 | DRAFT_00012 | TIGR00967      | preprotein translocase, SecY subunit                | 2.40E-83 |
| 2558669344 | DRAFT_00012 | KO:K03076      | preprotein translocase subunit SecY                 | 0.00E+00 |
| 2558669344 | DRAFT_00012 | ITERM:01964    | protein translocase subunit secY/sec61 alpha        |          |
| 2558669344 | DRAFT_00012 | Locus_type     | CDS                                                 |          |
| 2558669344 | DRAFT_00012 | Product_name   | protein translocase subunit secY/sec61 alpha        |          |
| 2558669344 | DRAFT_00012 | Scaffold       | DRAFT_contig_70_5_len_108223_read_count_1902626.1   |          |
| 2558669344 | DRAFT_00012 | Coordinates    | 7400..8854(-)                                       |          |
| 2558669344 | DRAFT_00012 | DNA_length     | 1455bp                                              |          |
| 2558669344 | DRAFT_00012 | Protein_length | 484aa                                               |          |
| 2558669344 | DRAFT_00012 | GC             |                                                     | 0.57     |
| 2558669344 | DRAFT_00012 | Transmembrane  | Yes                                                 |          |
| 2558669345 | DRAFT_00013 | KEGG_module    | M00178: Ribosome, bacteria                          |          |
| 2558669345 | DRAFT_00013 | KEGG_module    | M00179: Ribosome, archaea                           |          |
| 2558669345 | DRAFT_00013 | COG_category   | [J] Translation, ribosomal structure and biogenesis |          |
| 2558669345 | DRAFT_00013 | COG0200        | Ribosomal protein L15                               | 2.00E-09 |
| 2558669345 | DRAFT_00013 | pfam00828      | Ribosomal_L18e                                      | 7.00E-22 |
| 2558669345 | DRAFT_00013 | KO:K02876      | large subunit ribosomal protein L15                 | 9.60E-30 |
| 2558669345 | DRAFT_00013 | Locus_type     | CDS                                                 |          |
| 2558669345 | DRAFT_00013 | Product_name   | LSU ribosomal protein L15P                          |          |
| 2558669345 | DRAFT_00013 | Scaffold       | DRAFT_contig_70_5_len_108223_read_count_1902626.1   |          |
| 2558669345 | DRAFT_00013 | Coordinates    | 8866..9264(-)                                       |          |
| 2558669345 | DRAFT_00013 | DNA_length     | 399bp                                               |          |
| 2558669345 | DRAFT_00013 | Protein_length | 132aa                                               |          |
| 2558669345 | DRAFT_00013 | GC             |                                                     | 0.59     |
| 2558669346 | DRAFT_00014 | KEGG_module    | M00178: Ribosome, bacteria                          |          |
| 2558669346 | DRAFT_00014 | KEGG_module    | M00179: Ribosome, archaea                           |          |
| 2558669346 | DRAFT_00014 | TIGR01309      | 50S ribosomal protein L30P, archaeal                | 1.80E-30 |
| 2558669346 | DRAFT_00014 | KO:K02907      | large subunit ribosomal protein L30                 | 2.10E-23 |
| 2558669346 | DRAFT_00014 | ITERM:00257    | LSU ribosomal protein L30P                          |          |
| 2558669346 | DRAFT_00014 | Locus_type     | CDS                                                 |          |

|            |             |                |                                                                  |          |
|------------|-------------|----------------|------------------------------------------------------------------|----------|
| 2558669346 | DRAFT_00014 | Product_name   | LSU ribosomal protein L30P                                       |          |
| 2558669346 | DRAFT_00014 | Scaffold       | DRAFT_contig_70_5_len_108223_read_count_1902626.1                |          |
| 2558669346 | DRAFT_00014 | Coordinates    | 9266..9745(-)                                                    |          |
| 2558669346 | DRAFT_00014 | DNA_length     | 480bp                                                            |          |
| 2558669346 | DRAFT_00014 | Protein_length | 159aa                                                            |          |
| 2558669346 | DRAFT_00014 | GC             |                                                                  | 0.62     |
|            |             |                |                                                                  |          |
| 2558669347 | DRAFT_00015 | KEGG_module    | M00178: Ribosome, bacteria                                       |          |
| 2558669347 | DRAFT_00015 | KEGG_module    | M00179: Ribosome, archaea                                        |          |
| 2558669347 | DRAFT_00015 | COG_category   | [J] Translation, ribosomal structure and biogenesis              |          |
| 2558669347 | DRAFT_00015 | COG0098        | Ribosomal protein S5                                             | 3.00E-32 |
| 2558669347 | DRAFT_00015 | pfam00333      | Ribosomal_S5                                                     | 1.40E-18 |
| 2558669347 | DRAFT_00015 | pfam03719      | Ribosomal_S5_C                                                   | 1.20E-13 |
| 2558669347 | DRAFT_00015 | TIGR01020      | ribosomal protein S5(archaeal type)/S2(eukaryote cytosolic type) | 1.10E-79 |
| 2558669347 | DRAFT_00015 | KO:K02988      | small subunit ribosomal protein S5                               | 0.00E+00 |
| 2558669347 | DRAFT_00015 | ITERM:00284    | SSU ribosomal protein S5P                                        |          |
| 2558669347 | DRAFT_00015 | Locus_type     | CDS                                                              |          |
| 2558669347 | DRAFT_00015 | Product_name   | SSU ribosomal protein S5P                                        |          |
| 2558669347 | DRAFT_00015 | Scaffold       | DRAFT_contig_70_5_len_108223_read_count_1902626.1                |          |
| 2558669347 | DRAFT_00015 | Coordinates    | 9742..10374(-)                                                   |          |
| 2558669347 | DRAFT_00015 | DNA_length     | 633bp                                                            |          |
| 2558669347 | DRAFT_00015 | Protein_length | 210aa                                                            |          |
| 2558669347 | DRAFT_00015 | GC             |                                                                  | 0.61     |
|            |             |                |                                                                  |          |
| 2558669348 | DRAFT_00016 | KEGG_module    | M00179: Ribosome, archaea                                        |          |
| 2558669348 | DRAFT_00016 | KEGG_module    | M00178: Ribosome, bacteria                                       |          |
| 2558669348 | DRAFT_00016 | COG_category   | [J] Translation, ribosomal structure and biogenesis              |          |
| 2558669348 | DRAFT_00016 | COG0256        | Ribosomal protein L18                                            | 5.00E-22 |
| 2558669348 | DRAFT_00016 | pfam14204      | Ribosomal_L18_c                                                  | 6.40E-07 |
| 2558669348 | DRAFT_00016 | pfam00861      | Ribosomal_L18p                                                   | 5.50E-25 |
| 2558669348 | DRAFT_00016 | KO:K02881      | large subunit ribosomal protein L18                              | 9.40E-42 |
| 2558669348 | DRAFT_00016 | Locus_type     | CDS                                                              |          |
| 2558669348 | DRAFT_00016 | Product_name   | Ribosomal protein L18                                            |          |
| 2558669348 | DRAFT_00016 | Scaffold       | DRAFT_contig_70_5_len_108223_read_count_1902626.1                |          |

|            |             |                |                                                     |          |
|------------|-------------|----------------|-----------------------------------------------------|----------|
| 2558669348 | DRAFT_00016 | Coordinates    | 10371..10955(-)                                     |          |
| 2558669348 | DRAFT_00016 | DNA_length     | 585bp                                               |          |
| 2558669348 | DRAFT_00016 | Protein_length | 194aa                                               |          |
| 2558669348 | DRAFT_00016 | GC             |                                                     | 0.6      |
| 2558669349 | DRAFT_00017 | KEGG_module    | M00177: Ribosome, eukaryotes                        |          |
| 2558669349 | DRAFT_00017 | KEGG_module    | M00179: Ribosome, archaea                           |          |
| 2558669349 | DRAFT_00017 | COG_category   | [J] Translation, ribosomal structure and biogenesis |          |
| 2558669349 | DRAFT_00017 | COG2147        | Ribosomal protein L19E                              | 3.00E-26 |
| 2558669349 | DRAFT_00017 | pfam01280      | Ribosomal_L19e                                      | 1.30E-41 |
| 2558669349 | DRAFT_00017 | KO:K02885      | large subunit ribosomal protein L19e                | 1.30E-27 |
| 2558669349 | DRAFT_00017 | Locus_type     | CDS                                                 |          |
| 2558669349 | DRAFT_00017 | Product_name   | Ribosomal protein L19E                              |          |
| 2558669349 | DRAFT_00017 | Scaffold       | DRAFT_contig_70_5_len_108223_read_count_1902626.1   |          |
| 2558669349 | DRAFT_00017 | Coordinates    | 10952..11386(-)                                     |          |
| 2558669349 | DRAFT_00017 | DNA_length     | 435bp                                               |          |
| 2558669349 | DRAFT_00017 | Protein_length | 144aa                                               |          |
| 2558669349 | DRAFT_00017 | GC             |                                                     | 0.58     |
| 2558669350 | DRAFT_00018 | KEGG_module    | M00179: Ribosome, archaea                           |          |
| 2558669350 | DRAFT_00018 | KEGG_module    | M00177: Ribosome, eukaryotes                        |          |
| 2558669350 | DRAFT_00018 | COG_category   | [J] Translation, ribosomal structure and biogenesis |          |
| 2558669350 | DRAFT_00018 | COG1717        | Ribosomal protein L32E                              | 1.00E-30 |
| 2558669350 | DRAFT_00018 | pfam01655      | Ribosomal_L32e                                      | 9.90E-38 |
| 2558669350 | DRAFT_00018 | KO:K02912      | large subunit ribosomal protein L32e                | 9.60E-36 |
| 2558669350 | DRAFT_00018 | Locus_type     | CDS                                                 |          |
| 2558669350 | DRAFT_00018 | Product_name   | LSU ribosomal protein L32E                          |          |
| 2558669350 | DRAFT_00018 | Scaffold       | DRAFT_contig_70_5_len_108223_read_count_1902626.1   |          |
| 2558669350 | DRAFT_00018 | Coordinates    | 11370..11798(-)                                     |          |
| 2558669350 | DRAFT_00018 | DNA_length     | 429bp                                               |          |
| 2558669350 | DRAFT_00018 | Protein_length | 142aa                                               |          |
| 2558669350 | DRAFT_00018 | GC             |                                                     | 0.58     |
| 2558669351 | DRAFT_00019 | KEGG_module    | M00178: Ribosome, bacteria                          |          |

|            |             |                |                                                     |          |
|------------|-------------|----------------|-----------------------------------------------------|----------|
| 2558669351 | DRAFT_00019 | KEGG_module    | M00179: Ribosome, archaea                           |          |
| 2558669351 | DRAFT_00019 | COG_category   | [J] Translation, ribosomal structure and biogenesis |          |
| 2558669351 | DRAFT_00019 | COG0097        | Ribosomal protein L6P/L9E                           | 2.00E-29 |
| 2558669351 | DRAFT_00019 | pfam00347      | Ribosomal_L6                                        | 1.10E-10 |
| 2558669351 | DRAFT_00019 | pfam00347      | Ribosomal_L6                                        | 4.20E-06 |
| 2558669351 | DRAFT_00019 | TIGR03653      | archaeal ribosomal protein L6P                      | 6.80E-61 |
| 2558669351 | DRAFT_00019 | KO:K02933      | large subunit ribosomal protein L6                  | 0.00E+00 |
| 2558669351 | DRAFT_00019 | Locus_type     | CDS                                                 |          |
| 2558669351 | DRAFT_00019 | Product_name   | LSU ribosomal protein L6P                           |          |
| 2558669351 | DRAFT_00019 | Scaffold       | DRAFT_contig_70_5_len_108223_read_count_1902626.1   |          |
| 2558669351 | DRAFT_00019 | Coordinates    | 11801..12331(-)                                     |          |
| 2558669351 | DRAFT_00019 | DNA_length     | 531bp                                               |          |
| 2558669351 | DRAFT_00019 | Protein_length | 176aa                                               |          |
| 2558669351 | DRAFT_00019 | GC             |                                                     | 0.54     |
| 2558669352 | DRAFT_00020 | KEGG_module    | M00178: Ribosome, bacteria                          |          |
| 2558669352 | DRAFT_00020 | KEGG_module    | M00179: Ribosome, archaea                           |          |
| 2558669352 | DRAFT_00020 | COG_category   | [J] Translation, ribosomal structure and biogenesis |          |
| 2558669352 | DRAFT_00020 | COG0096        | Ribosomal protein S8                                | 2.00E-34 |
| 2558669352 | DRAFT_00020 | pfam00410      | Ribosomal_S8                                        | 5.30E-24 |
| 2558669352 | DRAFT_00020 | KO:K02994      | small subunit ribosomal protein S8                  | 5.00E-39 |
| 2558669352 | DRAFT_00020 | Locus_type     | CDS                                                 |          |
| 2558669352 | DRAFT_00020 | Product_name   | Ribosomal protein S8                                |          |
| 2558669352 | DRAFT_00020 | Scaffold       | DRAFT_contig_70_5_len_108223_read_count_1902626.1   |          |
| 2558669352 | DRAFT_00020 | Coordinates    | 12336..12728(-)                                     |          |
| 2558669352 | DRAFT_00020 | DNA_length     | 393bp                                               |          |
| 2558669352 | DRAFT_00020 | Protein_length | 130aa                                               |          |
| 2558669352 | DRAFT_00020 | GC             |                                                     | 0.56     |
| 2558669353 | DRAFT_00021 | KEGG_module    | M00178: Ribosome, bacteria                          |          |
| 2558669353 | DRAFT_00021 | KEGG_module    | M00179: Ribosome, archaea                           |          |
| 2558669353 | DRAFT_00021 | COG_category   | [J] Translation, ribosomal structure and biogenesis |          |
| 2558669353 | DRAFT_00021 | COG0199        | Ribosomal protein S14                               | 4.00E-05 |
| 2558669353 | DRAFT_00021 | pfam00253      | Ribosomal_S14                                       | 2.80E-16 |



|            |             |                |                                                     |          |
|------------|-------------|----------------|-----------------------------------------------------|----------|
| 2558669353 | DRAFT_00021 | KO:K02954      | small subunit ribosomal protein S14                 | 5.00E-14 |
| 2558669353 | DRAFT_00021 | Locus_type     | CDS                                                 |          |
| 2558669353 | DRAFT_00021 | Product_name   | SSU ribosomal protein S14P                          |          |
| 2558669353 | DRAFT_00021 | Scaffold       | DRAFT_contig_70_5_len_108223_read_count_1902626.1   |          |
| 2558669353 | DRAFT_00021 | Coordinates    | 12738..12899(-)                                     |          |
| 2558669353 | DRAFT_00021 | DNA_length     | 162bp                                               |          |
| 2558669353 | DRAFT_00021 | Protein_length | 53aa                                                |          |
| 2558669353 | DRAFT_00021 | GC             |                                                     | 0.52     |
| 2558669354 | DRAFT_00022 | KEGG_module    | M00179: Ribosome, archaea                           |          |
| 2558669354 | DRAFT_00022 | KEGG_module    | M00178: Ribosome, bacteria                          |          |
| 2558669354 | DRAFT_00022 | COG_category   | [J] Translation, ribosomal structure and biogenesis |          |
| 2558669354 | DRAFT_00022 | COG0094        | Ribosomal protein L5                                | 9.00E-39 |
| 2558669354 | DRAFT_00022 | pfam00673      | Ribosomal_L5_C                                      | 6.80E-22 |
| 2558669354 | DRAFT_00022 | pfam00281      | Ribosomal_L5                                        | 1.30E-17 |
| 2558669354 | DRAFT_00022 | KO:K02931      | large subunit ribosomal protein L5                  | 0.00E+00 |
| 2558669354 | DRAFT_00022 | Locus_type     | CDS                                                 |          |
| 2558669354 | DRAFT_00022 | Product_name   | Ribosomal protein L5                                |          |
| 2558669354 | DRAFT_00022 | Scaffold       | DRAFT_contig_70_5_len_108223_read_count_1902626.1   |          |
| 2558669354 | DRAFT_00022 | Coordinates    | 12896..13423(-)                                     |          |
| 2558669354 | DRAFT_00022 | DNA_length     | 528bp                                               |          |
| 2558669354 | DRAFT_00022 | Protein_length | 175aa                                               |          |
| 2558669354 | DRAFT_00022 | GC             |                                                     | 0.58     |
| 2558669355 | DRAFT_00023 | KEGG_module    | M00179: Ribosome, archaea                           |          |
| 2558669355 | DRAFT_00023 | KEGG_module    | M00177: Ribosome, eukaryotes                        |          |
| 2558669355 | DRAFT_00023 | COG_category   | [J] Translation, ribosomal structure and biogenesis |          |
| 2558669355 | DRAFT_00023 | COG1471        | Ribosomal protein S4E                               | 5.00E-49 |
| 2558669355 | DRAFT_00023 | pfam08071      | RS4NT                                               | 6.10E-11 |
| 2558669355 | DRAFT_00023 | pfam00900      | Ribosomal_S4e                                       | 6.10E-16 |
| 2558669355 | DRAFT_00023 | KO:K02987      | small subunit ribosomal protein S4e                 | 3.10E-42 |
| 2558669355 | DRAFT_00023 | Locus_type     | CDS                                                 |          |
| 2558669355 | DRAFT_00023 | Product_name   | Ribosomal protein S4E                               |          |
| 2558669355 | DRAFT_00023 | Scaffold       | DRAFT_contig_70_5_len_108223_read_count_1902626.1   |          |

|            |             |                |                                                     |          |
|------------|-------------|----------------|-----------------------------------------------------|----------|
| 2558669355 | DRAFT_00023 | Coordinates    | 13423..14148(-)                                     |          |
| 2558669355 | DRAFT_00023 | DNA_length     | 726bp                                               |          |
| 2558669355 | DRAFT_00023 | Protein_length | 241aa                                               |          |
| 2558669355 | DRAFT_00023 | GC             |                                                     | 0.59     |
| 2558669356 | DRAFT_00024 | COG_category   | [J] Translation, ribosomal structure and biogenesis |          |
| 2558669356 | DRAFT_00024 | COG0198        | Ribosomal protein L24                               | 2.00E-04 |
| 2558669356 | DRAFT_00024 | pfam00467      | KOW                                                 | 1.20E-05 |
| 2558669356 | DRAFT_00024 | TIGR01080      | ribosomal protein L24p/L26e, archaeal/eukaryotic    | 1.20E-29 |
| 2558669356 | DRAFT_00024 | Locus_type     | CDS                                                 |          |
| 2558669356 | DRAFT_00024 | Product_name   | ribosomal protein L24p/L26e, archaeal/eukaryotic    |          |
| 2558669356 | DRAFT_00024 | Scaffold       | DRAFT_contig_70_5_len_108223_read_count_1902626.1   |          |
| 2558669356 | DRAFT_00024 | Coordinates    | 14149..14439(-)                                     |          |
| 2558669356 | DRAFT_00024 | DNA_length     | 291bp                                               |          |
| 2558669356 | DRAFT_00024 | Protein_length | 96aa                                                |          |
| 2558669356 | DRAFT_00024 | GC             |                                                     | 0.55     |
| 2558669357 | DRAFT_00025 | KEGG_module    | M00179: Ribosome, archaea                           |          |
| 2558669357 | DRAFT_00025 | KEGG_module    | M00178: Ribosome, bacteria                          |          |
| 2558669357 | DRAFT_00025 | COG_category   | [J] Translation, ribosomal structure and biogenesis |          |
| 2558669357 | DRAFT_00025 | COG0093        | Ribosomal protein L14                               | 1.00E-28 |
| 2558669357 | DRAFT_00025 | pfam00238      | Ribosomal_L14                                       | 9.20E-34 |
| 2558669357 | DRAFT_00025 | KO:K02874      | large subunit ribosomal protein L14                 | 0.00E+00 |
| 2558669357 | DRAFT_00025 | Locus_type     | CDS                                                 |          |
| 2558669357 | DRAFT_00025 | Product_name   | LSU ribosomal protein L14P                          |          |
| 2558669357 | DRAFT_00025 | Scaffold       | DRAFT_contig_70_5_len_108223_read_count_1902626.1   |          |
| 2558669357 | DRAFT_00025 | Coordinates    | 14450..14884(-)                                     |          |
| 2558669357 | DRAFT_00025 | DNA_length     | 435bp                                               |          |
| 2558669357 | DRAFT_00025 | Protein_length | 144aa                                               |          |
| 2558669357 | DRAFT_00025 | GC             |                                                     | 0.57     |
| 2558669358 | DRAFT_00026 | KEGG_module    | M00178: Ribosome, bacteria                          |          |
| 2558669358 | DRAFT_00026 | KEGG_module    | M00179: Ribosome, archaea                           |          |
| 2558669358 | DRAFT_00026 | COG_category   | [J] Translation, ribosomal structure and biogenesis |          |

|            |             |                |                                                     |          |
|------------|-------------|----------------|-----------------------------------------------------|----------|
| 2558669358 | DRAFT_00026 | COG0186        | Ribosomal protein S17                               | 4.00E-17 |
| 2558669358 | DRAFT_00026 | pfam00366      | Ribosomal_S17                                       | 4.50E-20 |
| 2558669358 | DRAFT_00026 | TIGR03630      | archaeal ribosomal protein S17P                     | 7.70E-45 |
| 2558669358 | DRAFT_00026 | KO:K02961      | small subunit ribosomal protein S17                 | 2.80E-27 |
| 2558669358 | DRAFT_00026 | Locus_type     | CDS                                                 |          |
| 2558669358 | DRAFT_00026 | Product_name   | SSU ribosomal protein S17P                          |          |
| 2558669358 | DRAFT_00026 | Scaffold       | DRAFT_contig_70_5_len_108223_read_count_1902626.1   |          |
| 2558669358 | DRAFT_00026 | Coordinates    | 14884..15210(-)                                     |          |
| 2558669358 | DRAFT_00026 | DNA_length     | 327bp                                               |          |
| 2558669358 | DRAFT_00026 | Protein_length | 108aa                                               |          |
| 2558669358 | DRAFT_00026 | GC             |                                                     | 0.56     |
| 2558669359 | DRAFT_00027 | COG_category   | [J] Translation, ribosomal structure and biogenesis |          |
| 2558669359 | DRAFT_00027 | COG1588        | RNase P/RNase MRP subunit p29                       | 1.00E-06 |
| 2558669359 | DRAFT_00027 | pfam01868      | UPF0086                                             | 1.60E-10 |
| 2558669359 | DRAFT_00027 | Locus_type     | CDS                                                 |          |
| 2558669359 | DRAFT_00027 | Product_name   | RNase P/RNase MRP subunit p29                       |          |
| 2558669359 | DRAFT_00027 | Scaffold       | DRAFT_contig_70_5_len_108223_read_count_1902626.1   |          |
| 2558669359 | DRAFT_00027 | Coordinates    | 15207..15443(-)                                     |          |
| 2558669359 | DRAFT_00027 | DNA_length     | 237bp                                               |          |
| 2558669359 | DRAFT_00027 | Protein_length | 78aa                                                |          |
| 2558669359 | DRAFT_00027 | GC             |                                                     | 0.55     |
| 2558669360 | DRAFT_00028 | KEGG_module    | M00179: Ribosome, archaea                           |          |
| 2558669360 | DRAFT_00028 | KEGG_module    | M00178: Ribosome, bacteria                          |          |
| 2558669360 | DRAFT_00028 | pfam00831      | Ribosomal_L29                                       | 9.40E-12 |
| 2558669360 | DRAFT_00028 | TIGR00012      | ribosomal protein L29                               | 1.40E-13 |
| 2558669360 | DRAFT_00028 | KO:K02904      | large subunit ribosomal protein L29                 | 6.90E-08 |
| 2558669360 | DRAFT_00028 | Locus_type     | CDS                                                 |          |
| 2558669360 | DRAFT_00028 | Product_name   | ribosomal protein L29                               |          |
| 2558669360 | DRAFT_00028 | Scaffold       | DRAFT_contig_70_5_len_108223_read_count_1902626.1   |          |
| 2558669360 | DRAFT_00028 | Coordinates    | 15440..15646(-)                                     |          |
| 2558669360 | DRAFT_00028 | DNA_length     | 207bp                                               |          |
| 2558669360 | DRAFT_00028 | Protein_length | 68aa                                                |          |

|            |             |                |                                                          |          |
|------------|-------------|----------------|----------------------------------------------------------|----------|
| 2558669360 | DRAFT_00028 | GC             |                                                          | 0.53     |
| 2558669361 | DRAFT_00029 | KEGG_module    | M00179: Ribosome, archaea                                |          |
| 2558669361 | DRAFT_00029 | KEGG_module    | M00178: Ribosome, bacteria                               |          |
| 2558669361 | DRAFT_00029 | COG_category   | [J] Translation, ribosomal structure and biogenesis      |          |
| 2558669361 | DRAFT_00029 | COG0092        | Ribosomal protein S3                                     | 2.00E-45 |
| 2558669361 | DRAFT_00029 | pfam07650      | KH_2                                                     | 7.20E-12 |
| 2558669361 | DRAFT_00029 | pfam00189      | Ribosomal_S3_C                                           | 1.00E-12 |
| 2558669361 | DRAFT_00029 | TIGR01008      | ribosomal protein S3, eukaryotic/archaeal type           | 6.70E-63 |
| 2558669361 | DRAFT_00029 | KO:K02982      | small subunit ribosomal protein S3                       | 0.00E+00 |
| 2558669361 | DRAFT_00029 | Locus_type     | CDS                                                      |          |
| 2558669361 | DRAFT_00029 | Product_name   | ribosomal protein S3, eukaryotic/archaeal type           |          |
| 2558669361 | DRAFT_00029 | Scaffold       | DRAFT_contig_70_5_len_108223_read_count_1902626.1        |          |
| 2558669361 | DRAFT_00029 | Coordinates    | 15603..16277(-)                                          |          |
| 2558669361 | DRAFT_00029 | DNA_length     | 675bp                                                    |          |
| 2558669361 | DRAFT_00029 | Protein_length | 224aa                                                    |          |
| 2558669361 | DRAFT_00029 | GC             |                                                          | 0.57     |
| 2558669362 | DRAFT_00030 | KEGG_module    | M00179: Ribosome, archaea                                |          |
| 2558669362 | DRAFT_00030 | KEGG_module    | M00178: Ribosome, bacteria                               |          |
| 2558669362 | DRAFT_00030 | COG_category   | [J] Translation, ribosomal structure and biogenesis      |          |
| 2558669362 | DRAFT_00030 | COG0091        | Ribosomal protein L22                                    | 1.00E-20 |
| 2558669362 | DRAFT_00030 | pfam00237      | Ribosomal_L22                                            | 9.20E-28 |
| 2558669362 | DRAFT_00030 | TIGR01038      | ribosomal protein L22(archaeal)/L17(eukaryotic/archaeal) | 2.10E-52 |
| 2558669362 | DRAFT_00030 | KO:K02890      | large subunit ribosomal protein L22                      | 4.60E-36 |
| 2558669362 | DRAFT_00030 | ITERM:00245    | LSU ribosomal protein L22P                               |          |
| 2558669362 | DRAFT_00030 | Locus_type     | CDS                                                      |          |
| 2558669362 | DRAFT_00030 | Product_name   | LSU ribosomal protein L22P                               |          |
| 2558669362 | DRAFT_00030 | Scaffold       | DRAFT_contig_70_5_len_108223_read_count_1902626.1        |          |
| 2558669362 | DRAFT_00030 | Coordinates    | 16281..16742(-)                                          |          |
| 2558669362 | DRAFT_00030 | DNA_length     | 462bp                                                    |          |
| 2558669362 | DRAFT_00030 | Protein_length | 153aa                                                    |          |
| 2558669362 | DRAFT_00030 | GC             |                                                          | 0.57     |

|            |             |                |                                                                                |          |
|------------|-------------|----------------|--------------------------------------------------------------------------------|----------|
| 2558669363 | DRAFT_00031 | KEGG_module    | M00149: Succinate dehydrogenase, prokaryotes                                   |          |
| 2558669363 | DRAFT_00031 | KEGG_module    | M00009: Citrate cycle (TCA cycle, Krebs cycle)                                 |          |
| 2558669363 | DRAFT_00031 | KEGG_module    | M00011: Citrate cycle, second carbon oxidation, 2-oxoglutarate => oxaloacetate |          |
| 2558669363 | DRAFT_00031 | COG_category   | [C] Energy production and conversion                                           |          |
| 2558669363 | DRAFT_00031 | COG2142        | Succinate dehydrogenase, hydrophobic anchor subunit                            | 1.00E-03 |
| 2558669363 | DRAFT_00031 | pfam01127      | Sdh_cyt                                                                        | 2.50E-09 |
| 2558669363 | DRAFT_00031 | KO:K00242      | succinate dehydrogenase membrane anchor subunit                                | 2.30E-08 |
| 2558669363 | DRAFT_00031 | Locus_type     | CDS                                                                            |          |
| 2558669363 | DRAFT_00031 | Product_name   | Succinate dehydrogenase, hydrophobic anchor subunit                            |          |
| 2558669363 | DRAFT_00031 | Scaffold       | DRAFT_contig_70_5_len_108223_read_count_1902626.1                              |          |
| 2558669363 | DRAFT_00031 | Coordinates    | 17050..17394(-)                                                                |          |
| 2558669363 | DRAFT_00031 | DNA_length     | 345bp                                                                          |          |
| 2558669363 | DRAFT_00031 | Protein_length | 114aa                                                                          |          |
| 2558669363 | DRAFT_00031 | GC             |                                                                                | 0.52     |
| 2558669363 | DRAFT_00031 | Transmembrane  | Yes                                                                            |          |
| 2558669364 | DRAFT_00032 | KEGG_module    | M00149: Succinate dehydrogenase, prokaryotes                                   |          |
| 2558669364 | DRAFT_00032 | KEGG_module    | M00011: Citrate cycle, second carbon oxidation, 2-oxoglutarate => oxaloacetate |          |
| 2558669364 | DRAFT_00032 | KEGG_module    | M00009: Citrate cycle (TCA cycle, Krebs cycle)                                 |          |
| 2558669364 | DRAFT_00032 | COG_category   | [C] Energy production and conversion                                           |          |
| 2558669364 | DRAFT_00032 | COG2009        | Succinate dehydrogenase/fumarate reductase, cytochrome b subunit               | 2.00E-06 |
| 2558669364 | DRAFT_00032 | pfam01127      | Sdh_cyt                                                                        | 1.20E-10 |
| 2558669364 | DRAFT_00032 | TIGR02970      | succinate dehydrogenase, cytochrome b556 subunit                               | 3.00E-15 |
| 2558669364 | DRAFT_00032 | KO:K00241      | succinate dehydrogenase cytochrome b556 subunit                                | 2.90E-22 |
| 2558669364 | DRAFT_00032 | ITERM:01374    | succinate dehydrogenase subunit C (EC 1.3.5.1)                                 |          |
| 2558669364 | DRAFT_00032 | Locus_type     | CDS                                                                            |          |
| 2558669364 | DRAFT_00032 | Product_name   | succinate dehydrogenase subunit C (EC 1.3.5.1)                                 |          |
| 2558669364 | DRAFT_00032 | Scaffold       | DRAFT_contig_70_5_len_108223_read_count_1902626.1                              |          |
| 2558669364 | DRAFT_00032 | Coordinates    | 17394..17855(-)                                                                |          |
| 2558669364 | DRAFT_00032 | DNA_length     | 462bp                                                                          |          |
| 2558669364 | DRAFT_00032 | Protein_length | 153aa                                                                          |          |
| 2558669364 | DRAFT_00032 | GC             |                                                                                | 0.54     |
| 2558669364 | DRAFT_00032 | Transmembrane  | Yes                                                                            |          |

|            |             |                |                                                                                |          |
|------------|-------------|----------------|--------------------------------------------------------------------------------|----------|
| 2558669365 | DRAFT_00033 | KEGG_module    | M00009: Citrate cycle (TCA cycle, Krebs cycle)                                 |          |
| 2558669365 | DRAFT_00033 | KEGG_module    | M00011: Citrate cycle, second carbon oxidation, 2-oxoglutarate => oxaloacetate |          |
| 2558669365 | DRAFT_00033 | KEGG_module    | M00149: Succinate dehydrogenase, prokaryotes                                   |          |
| 2558669365 | DRAFT_00033 | Metacyc        | P23-PWY: reductive TCA cycle I                                                 |          |
| 2558669365 | DRAFT_00033 | Metacyc        | P105-PWY: TCA cycle IV (2-oxoglutarate decarboxylase)                          |          |
| 2558669365 | DRAFT_00033 | Metacyc        | PWY-6969: TCA cycle V (2-oxoglutarate:ferredoxin oxidoreductase)               |          |
| 2558669365 | DRAFT_00033 | Metacyc        | PWY-5392: reductive TCA cycle II                                               |          |
| 2558669365 | DRAFT_00033 | Metacyc        | P42-PWY: incomplete reductive TCA cycle                                        |          |
| 2558669365 | DRAFT_00033 | COG_category   | [C] Energy production and conversion                                           |          |
| 2558669365 | DRAFT_00033 | COG0479        | Succinate dehydrogenase/fumarate reductase, Fe-S protein subunit               | 2.00E-65 |
| 2558669365 | DRAFT_00033 | pfam13183      | Fer4_8                                                                         | 2.40E-11 |
| 2558669365 | DRAFT_00033 | pfam13085      | Fer2_3                                                                         | 6.50E-26 |
| 2558669365 | DRAFT_00033 | EC:1.3.99.1    | Succinate dehydrogenase.                                                       |          |
| 2558669365 | DRAFT_00033 | TIGR00384      | succinate dehydrogenase and fumarate reductase iron-sulfur protein             | 4.10E-73 |
| 2558669365 | DRAFT_00033 | KO:K00240      | succinate dehydrogenase iron-sulfur subunit [EC:1.3.99.1]                      | 0.00E+00 |
| 2558669365 | DRAFT_00033 | Locus_type     | CDS                                                                            |          |
| 2558669365 | DRAFT_00033 | Product_name   | succinate dehydrogenase and fumarate reductase iron-sulfur protein             |          |
| 2558669365 | DRAFT_00033 | Scaffold       | DRAFT_contig_70_5_len_108223_read_count_1902626.1                              |          |
| 2558669365 | DRAFT_00033 | Coordinates    | 17852..18592(-)                                                                |          |
| 2558669365 | DRAFT_00033 | DNA_length     | 741bp                                                                          |          |
| 2558669365 | DRAFT_00033 | Protein_length | 246aa                                                                          |          |
| 2558669365 | DRAFT_00033 | GC             |                                                                                | 0.57     |
| 2558669366 | DRAFT_00034 | KEGG_module    | M00173: Reductive citric acid cycle (Arnon-Buchanan cycle)                     |          |
| 2558669366 | DRAFT_00034 | KEGG_module    | M00374: Dicarboxylate-hydroxybutyrate cycle                                    |          |
| 2558669366 | DRAFT_00034 | KEGG_module    | M00376: 3-Hydroxypropionate bicycle                                            |          |
| 2558669366 | DRAFT_00034 | KEGG_module    | M00009: Citrate cycle (TCA cycle, Krebs cycle)                                 |          |
| 2558669366 | DRAFT_00034 | KEGG_module    | M00149: Succinate dehydrogenase, prokaryotes                                   |          |
| 2558669366 | DRAFT_00034 | KEGG_module    | M00011: Citrate cycle, second carbon oxidation, 2-oxoglutarate => oxaloacetate |          |
| 2558669366 | DRAFT_00034 | Metacyc        | P105-PWY: TCA cycle IV (2-oxoglutarate decarboxylase)                          |          |
| 2558669366 | DRAFT_00034 | Metacyc        | PWY-6969: TCA cycle V (2-oxoglutarate:ferredoxin oxidoreductase)               |          |
| 2558669366 | DRAFT_00034 | Metacyc        | P42-PWY: incomplete reductive TCA cycle                                        |          |
| 2558669366 | DRAFT_00034 | Metacyc        | P23-PWY: reductive TCA cycle I                                                 |          |
| 2558669366 | DRAFT_00034 | Metacyc        | PWY-5392: reductive TCA cycle II                                               |          |

|            |             |                |                                                                     |           |
|------------|-------------|----------------|---------------------------------------------------------------------|-----------|
| 2558669366 | DRAFT_00034 | COG_category   | [C] Energy production and conversion                                |           |
| 2558669366 | DRAFT_00034 | COG1053        | Succinate dehydrogenase/fumarate reductase, flavoprotein subunit    | 0.00E+00  |
| 2558669366 | DRAFT_00034 | pfam00890      | FAD_binding_2                                                       | 6.00E-105 |
| 2558669366 | DRAFT_00034 | pfam02910      | Succ_DH_flav_C                                                      | 6.70E-40  |
| 2558669366 | DRAFT_00034 | EC:1.3.99.1    | Succinate dehydrogenase.                                            |           |
| 2558669366 | DRAFT_00034 | TIGR01812      | succinate dehydrogenase or fumarate reductase, flavoprotein subunit | 0.00E+00  |
| 2558669366 | DRAFT_00034 | KO:K00239      | succinate dehydrogenase flavoprotein subunit [EC:1.3.99.1]          | 0.00E+00  |
| 2558669366 | DRAFT_00034 | Locus_type     | CDS                                                                 |           |
| 2558669366 | DRAFT_00034 | Product_name   | succinate dehydrogenase subunit A (EC 1.3.5.1)                      |           |
| 2558669366 | DRAFT_00034 | Scaffold       | DRAFT_contig_70_5_len_108223_read_count_1902626.1                   |           |
| 2558669366 | DRAFT_00034 | Coordinates    | 18677..20425(-)                                                     |           |
| 2558669366 | DRAFT_00034 | DNA_length     | 1749bp                                                              |           |
| 2558669366 | DRAFT_00034 | Protein_length | 582aa                                                               |           |
| 2558669366 | DRAFT_00034 | GC             |                                                                     | 0.58      |
| 2558669367 | DRAFT_00035 | COG_category   | [C] Energy production and conversion                                |           |
| 2558669367 | DRAFT_00035 | COG0822        | NifU homolog involved in Fe-S cluster formation                     | 7.00E-28  |
| 2558669367 | DRAFT_00035 | pfam01592      | NifU_N                                                              | 3.10E-32  |
| 2558669367 | DRAFT_00035 | TIGR01994      | SUF system FeS assembly protein, NifU family                        | 7.80E-33  |
| 2558669367 | DRAFT_00035 | KO:K04488      | nitrogen fixation protein NifU and related proteins                 | 4.60E-40  |
| 2558669367 | DRAFT_00035 | Locus_type     | CDS                                                                 |           |
| 2558669367 | DRAFT_00035 | Product_name   | SUF system FeS assembly protein, NifU family                        |           |
| 2558669367 | DRAFT_00035 | Scaffold       | DRAFT_contig_70_5_len_108223_read_count_1902626.1                   |           |
| 2558669367 | DRAFT_00035 | Coordinates    | 20581..20979(-)                                                     |           |
| 2558669367 | DRAFT_00035 | DNA_length     | 399bp                                                               |           |
| 2558669367 | DRAFT_00035 | Protein_length | 132aa                                                               |           |
| 2558669367 | DRAFT_00035 | GC             |                                                                     | 0.54      |
| 2558669368 | DRAFT_00036 | Metacyc        | PWY-6823: molybdenum cofactor biosynthesis                          |           |
| 2558669368 | DRAFT_00036 | Metacyc        | PWY-6891: thiazole biosynthesis II (Bacillus)                       |           |
| 2558669368 | DRAFT_00036 | Metacyc        | PWY-6892: thiazole biosynthesis I (E. coli)                         |           |
| 2558669368 | DRAFT_00036 | Metacyc        | PWY0-1021: alanine biosynthesis III                                 |           |
| 2558669368 | DRAFT_00036 | COG_category   | [E] Amino acid transport and metabolism                             |           |
| 2558669368 | DRAFT_00036 | COG0520        | Selenocysteine lyase                                                | 0.00E+00  |

|            |             |                |                                                                                        |          |
|------------|-------------|----------------|----------------------------------------------------------------------------------------|----------|
| 2558669368 | DRAFT_00036 | pfam00266      | Aminotran_5                                                                            | 0.00E+00 |
| 2558669368 | DRAFT_00036 | EC:2.8.1.7     | Cysteine desulfurase.                                                                  |          |
| 2558669368 | DRAFT_00036 | EC:4.4.1.16    | Selenocysteine lyase.                                                                  |          |
| 2558669368 | DRAFT_00036 | TIGR01979      | cysteine desulfurases, SufSfamily                                                      | 0.00E+00 |
| 2558669368 | DRAFT_00036 | KO:K11717      | cysteine desulfurase / selenocysteine lyase [EC:2.8.1.7 4.4.1.16]                      | 0.00E+00 |
| 2558669368 | DRAFT_00036 | Locus_type     | CDS                                                                                    |          |
| 2558669368 | DRAFT_00036 | Product_name   | cysteine desulfurase (EC 2.8.1.7)                                                      |          |
| 2558669368 | DRAFT_00036 | Scaffold       | DRAFT_contig_70_5_len_108223_read_count_1902626.1                                      |          |
| 2558669368 | DRAFT_00036 | Coordinates    | 20976..22214(-)                                                                        |          |
| 2558669368 | DRAFT_00036 | DNA_length     | 1239bp                                                                                 |          |
| 2558669368 | DRAFT_00036 | Protein_length | 412aa                                                                                  |          |
| 2558669368 | DRAFT_00036 | GC             |                                                                                        | 0.58     |
| 2558669369 | DRAFT_00037 | KEGG_module    | M00539: Cumate degradation, p-cumate => 2-oxopent-4-enoate + 2-methylpropanoate        |          |
| 2558669369 | DRAFT_00037 | KEGG_module    | M00547: Benzene/toluene degradation, benzene => catechol / toluene => 3-methylcatechol |          |
| 2558669369 | DRAFT_00037 | KEGG_module    | M00545: Trans-cinnamate degradation, trans-cinnamate => 2-oxopent-4-enoate + fumarate  |          |
| 2558669369 | DRAFT_00037 | KEGG_module    | M00543: Biphenyl degradation, biphenyl => 2-oxopent-4-enoate + benzoate                |          |
| 2558669369 | DRAFT_00037 | COG_category   | [R] General function prediction only                                                   |          |
| 2558669369 | DRAFT_00037 | COG_category   | [P] Inorganic ion transport and metabolism                                             |          |
| 2558669369 | DRAFT_00037 | COG2146        | Ferredoxin subunits of nitrite reductase and ring-hydroxylating dioxyge                | 2.00E-19 |
| 2558669369 | DRAFT_00037 | pfam00355      | Rieske                                                                                 | 6.00E-17 |
| 2558669369 | DRAFT_00037 | KO:K05710      | dioxygenase ferredoxin subunit                                                         | 6.90E-15 |
| 2558669369 | DRAFT_00037 | Locus_type     | CDS                                                                                    |          |
| 2558669369 | DRAFT_00037 | Product_name   | Ferredoxin subunits of nitrite reductase and ring-hydroxylating dioxyg                 |          |
| 2558669369 | DRAFT_00037 | Scaffold       | DRAFT_contig_70_5_len_108223_read_count_1902626.1                                      |          |
| 2558669369 | DRAFT_00037 | Coordinates    | 22233..22550(-)                                                                        |          |
| 2558669369 | DRAFT_00037 | DNA_length     | 318bp                                                                                  |          |
| 2558669369 | DRAFT_00037 | Protein_length | 105aa                                                                                  |          |
| 2558669369 | DRAFT_00037 | GC             |                                                                                        | 0.57     |
| 2558669370 | DRAFT_00038 | COG_category   | [O] Posttranslational modification, protein turnover, chaperones                       |          |
| 2558669370 | DRAFT_00038 | COG0719        | ABC-type transport system involved in Fe-S cluster assembly, permease                  | 1.00E-70 |
| 2558669370 | DRAFT_00038 | pfam01458      | UPF0051                                                                                | 1.30E-57 |
| 2558669370 | DRAFT_00038 | TIGR01981      | FeS assembly protein SufD                                                              | 1.70E-69 |



|            |             |                |                                                                              |           |
|------------|-------------|----------------|------------------------------------------------------------------------------|-----------|
| 2558669370 | DRAFT_00038 | KO:K09014      | Fe-S cluster assembly protein SufB                                           | 0.00E+00  |
| 2558669370 | DRAFT_00038 | Locus_type     | CDS                                                                          |           |
| 2558669370 | DRAFT_00038 | Product_name   | ABC-type transport system involved in Fe-S cluster assembly, permea:         |           |
| 2558669370 | DRAFT_00038 | Scaffold       | DRAFT_contig_70_5_len_108223_read_count_1902626.1                            |           |
| 2558669370 | DRAFT_00038 | Coordinates    | 22547..23959(-)                                                              |           |
| 2558669370 | DRAFT_00038 | DNA_length     | 1413bp                                                                       |           |
| 2558669370 | DRAFT_00038 | Protein_length | 470aa                                                                        |           |
| 2558669370 | DRAFT_00038 | GC             |                                                                              | 0.56      |
| 2558669371 | DRAFT_00039 | COG_category   | [O] Posttranslational modification, protein turnover, chaperones             |           |
| 2558669371 | DRAFT_00039 | COG0719        | ABC-type transport system involved in Fe-S cluster assembly, permease        | 2.00E-110 |
| 2558669371 | DRAFT_00039 | pfam01458      | UPF0051                                                                      | 1.60E-66  |
| 2558669371 | DRAFT_00039 | TIGR01980      | FeS assembly protein SufB                                                    | 0.00E+00  |
| 2558669371 | DRAFT_00039 | KO:K09014      | Fe-S cluster assembly protein SufB                                           | 0.00E+00  |
| 2558669371 | DRAFT_00039 | Locus_type     | CDS                                                                          |           |
| 2558669371 | DRAFT_00039 | Product_name   | Iron-regulated ABC transporter membrane component SufB                       |           |
| 2558669371 | DRAFT_00039 | Scaffold       | DRAFT_contig_70_5_len_108223_read_count_1902626.1                            |           |
| 2558669371 | DRAFT_00039 | Coordinates    | 23987..25399(-)                                                              |           |
| 2558669371 | DRAFT_00039 | DNA_length     | 1413bp                                                                       |           |
| 2558669371 | DRAFT_00039 | Protein_length | 470aa                                                                        |           |
| 2558669371 | DRAFT_00039 | GC             |                                                                              | 0.57      |
| 2558669372 | DRAFT_00040 | COG_category   | [O] Posttranslational modification, protein turnover, chaperones             |           |
| 2558669372 | DRAFT_00040 | COG0396        | ABC-type transport system involved in Fe-S cluster assembly, ATPase $\alpha$ | 2.00E-97  |
| 2558669372 | DRAFT_00040 | pfam00005      | ABC_tran                                                                     | 5.80E-20  |
| 2558669372 | DRAFT_00040 | TIGR01978      | FeS assembly ATPase SufC                                                     | 1.70E-104 |
| 2558669372 | DRAFT_00040 | KO:K09013      | Fe-S cluster assembly ATP-binding protein                                    | 0.00E+00  |
| 2558669372 | DRAFT_00040 | Locus_type     | CDS                                                                          |           |
| 2558669372 | DRAFT_00040 | Product_name   | FeS assembly ATPase SufC                                                     |           |
| 2558669372 | DRAFT_00040 | Scaffold       | DRAFT_contig_70_5_len_108223_read_count_1902626.1                            |           |
| 2558669372 | DRAFT_00040 | Coordinates    | 25444..26220(-)                                                              |           |
| 2558669372 | DRAFT_00040 | DNA_length     | 777bp                                                                        |           |
| 2558669372 | DRAFT_00040 | Protein_length | 258aa                                                                        |           |
| 2558669372 | DRAFT_00040 | GC             |                                                                              | 0.55      |

|            |             |                |                                                                  |          |
|------------|-------------|----------------|------------------------------------------------------------------|----------|
| 2558669373 | DRAFT_00041 | COG_category   | [T] Signal transduction mechanisms                               |          |
| 2558669373 | DRAFT_00041 | COG1956        | GAF domain-containing protein                                    | 1.00E-32 |
| 2558669373 | DRAFT_00041 | pfam13185      | GAF_2                                                            | 3.90E-09 |
| 2558669373 | DRAFT_00041 | KO:K07170      | GAF domain-containing protein                                    | 5.20E-38 |
| 2558669373 | DRAFT_00041 | Locus_type     | CDS                                                              |          |
| 2558669373 | DRAFT_00041 | Product_name   | GAF domain-containing protein                                    |          |
| 2558669373 | DRAFT_00041 | Scaffold       | DRAFT_contig_70_5_len_108223_read_count_1902626.1                |          |
| 2558669373 | DRAFT_00041 | Coordinates    | 26371..26853(-)                                                  |          |
| 2558669373 | DRAFT_00041 | DNA_length     | 483bp                                                            |          |
| 2558669373 | DRAFT_00041 | Protein_length | 160aa                                                            |          |
| 2558669373 | DRAFT_00041 | GC             |                                                                  | 0.57     |
| 2558669374 | DRAFT_00042 | KEGG_module    | M00174: Methane oxidation, methylotroph, methane => CO2          |          |
| 2558669374 | DRAFT_00042 | KEGG_module    | M00532: Photorespiration                                         |          |
| 2558669374 | DRAFT_00042 | Metacyc        | PWY66-162: ethanol degradation IV                                |          |
| 2558669374 | DRAFT_00042 | COG_category   | [P] Inorganic ion transport and metabolism                       |          |
| 2558669374 | DRAFT_00042 | COG0753        | Catalase                                                         | 0.00E+00 |
| 2558669374 | DRAFT_00042 | pfam06628      | Catalase-rel                                                     | 3.20E-19 |
| 2558669374 | DRAFT_00042 | pfam00199      | Catalase                                                         | 0.00E+00 |
| 2558669374 | DRAFT_00042 | EC:1.11.1.6    | Catalase.                                                        |          |
| 2558669374 | DRAFT_00042 | KO:K03781      | catalase [EC:1.11.1.6]                                           | 0.00E+00 |
| 2558669374 | DRAFT_00042 | Locus_type     | CDS                                                              |          |
| 2558669374 | DRAFT_00042 | Product_name   | Catalase                                                         |          |
| 2558669374 | DRAFT_00042 | Scaffold       | DRAFT_contig_70_5_len_108223_read_count_1902626.1                |          |
| 2558669374 | DRAFT_00042 | Coordinates    | 27083..28558(+)                                                  |          |
| 2558669374 | DRAFT_00042 | DNA_length     | 1476bp                                                           |          |
| 2558669374 | DRAFT_00042 | Protein_length | 491aa                                                            |          |
| 2558669374 | DRAFT_00042 | GC             |                                                                  | 0.51     |
| 2558669375 | DRAFT_00043 | COG_category   | [O] Posttranslational modification, protein turnover, chaperones |          |
| 2558669375 | DRAFT_00043 | COG0459        | Chaperonin GroEL (HSP60 family)                                  | 0.00E+00 |
| 2558669375 | DRAFT_00043 | pfam00118      | Cpn60_TCP1                                                       | 0.00E+00 |
| 2558669375 | DRAFT_00043 | TIGR02339      | thermosome, various subunits, archaeal                           | 0.00E+00 |

|            |             |                |                                                                 |          |
|------------|-------------|----------------|-----------------------------------------------------------------|----------|
| 2558669375 | DRAFT_00043 | Locus_type     | CDS                                                             |          |
| 2558669375 | DRAFT_00043 | Product_name   | thermosome subunit                                              |          |
| 2558669375 | DRAFT_00043 | Scaffold       | DRAFT_contig_70_5_len_108223_read_count_1902626.1               |          |
| 2558669375 | DRAFT_00043 | Coordinates    | 28648..30303(+)                                                 |          |
| 2558669375 | DRAFT_00043 | DNA_length     | 1656bp                                                          |          |
| 2558669375 | DRAFT_00043 | Protein_length | 551aa                                                           |          |
| 2558669375 | DRAFT_00043 | GC             |                                                                 | 0.57     |
|            |             |                |                                                                 |          |
| 2558669376 | DRAFT_00044 | Locus_type     | CDS                                                             |          |
| 2558669376 | DRAFT_00044 | Product_name   | hypothetical protein                                            |          |
| 2558669376 | DRAFT_00044 | Scaffold       | DRAFT_contig_70_5_len_108223_read_count_1902626.1               |          |
| 2558669376 | DRAFT_00044 | Coordinates    | 30416..30658(-)                                                 |          |
| 2558669376 | DRAFT_00044 | DNA_length     | 243bp                                                           |          |
| 2558669376 | DRAFT_00044 | Protein_length | 80aa                                                            |          |
| 2558669376 | DRAFT_00044 | GC             |                                                                 | 0.56     |
|            |             |                |                                                                 |          |
| 2558669377 | DRAFT_00045 | COG_category   | [S] Function unknown                                            |          |
| 2558669377 | DRAFT_00045 | COG2090        | Uncharacterized protein conserved in archaea                    | 5.00E-30 |
| 2558669377 | DRAFT_00045 | pfam04027      | DUF371                                                          | 9.70E-41 |
| 2558669377 | DRAFT_00045 | KO:K09738      | hypothetical protein                                            | 9.40E-33 |
| 2558669377 | DRAFT_00045 | Locus_type     | CDS                                                             |          |
| 2558669377 | DRAFT_00045 | Product_name   | Uncharacterized protein conserved in archaea                    |          |
| 2558669377 | DRAFT_00045 | Scaffold       | DRAFT_contig_70_5_len_108223_read_count_1902626.1               |          |
| 2558669377 | DRAFT_00045 | Coordinates    | 30931..31338(+)                                                 |          |
| 2558669377 | DRAFT_00045 | DNA_length     | 408bp                                                           |          |
| 2558669377 | DRAFT_00045 | Protein_length | 135aa                                                           |          |
| 2558669377 | DRAFT_00045 | GC             |                                                                 | 0.59     |
|            |             |                |                                                                 |          |
| 2558669378 | DRAFT_00046 | KEGG_module    | M00095: C5 isoprenoid biosynthesis, mevalonate pathway          |          |
| 2558669378 | DRAFT_00046 | Metacyc        | PWY-922: mevalonate pathway I                                   |          |
| 2558669378 | DRAFT_00046 | IMG_pathway    | 178: Mevalonate pathway for isopentenyl pyrophosphate synthesis |          |
| 2558669378 | DRAFT_00046 | COG_category   | [I] Lipid transport and metabolism                              |          |
| 2558669378 | DRAFT_00046 | COG3407        | Mevalonate pyrophosphate decarboxylase                          | 1.00E-48 |
| 2558669378 | DRAFT_00046 | EC:4.1.1.33    | Diphosphomevalonate decarboxylase.                              |          |

|            |             |                |                                                                                   |          |
|------------|-------------|----------------|-----------------------------------------------------------------------------------|----------|
| 2558669378 | DRAFT_00046 | TIGR01240      | diphosphomevalonate decarboxylase                                                 | 1.40E-45 |
| 2558669378 | DRAFT_00046 | KO:K01597      | diphosphomevalonate decarboxylase [EC:4.1.1.33]                                   | 2.00E-44 |
| 2558669378 | DRAFT_00046 | ITERM:00468    | diphosphomevalonate decarboxylase (EC 4.1.1.33)                                   |          |
| 2558669378 | DRAFT_00046 | Locus_type     | CDS                                                                               |          |
| 2558669378 | DRAFT_00046 | Product_name   | diphosphomevalonate decarboxylase (EC 4.1.1.33)                                   |          |
| 2558669378 | DRAFT_00046 | Scaffold       | DRAFT_contig_70_5_len_108223_read_count_1902626.1                                 |          |
| 2558669378 | DRAFT_00046 | Coordinates    | 31335..32279(+)                                                                   |          |
| 2558669378 | DRAFT_00046 | DNA_length     | 945bp                                                                             |          |
| 2558669378 | DRAFT_00046 | Protein_length | 314aa                                                                             |          |
| 2558669378 | DRAFT_00046 | GC             |                                                                                   | 0.59     |
| 2558669379 | DRAFT_00047 | KEGG_module    | M00083: Fatty acid biosynthesis, elongation                                       |          |
| 2558669379 | DRAFT_00047 | KEGG_module    | M00572: Pimeloyl-ACP biosynthesis, BioC-BioH pathway, malonyl-ACP => pimeloyl-ACP |          |
| 2558669379 | DRAFT_00047 | Metacyc        | PWY-5367: petroselinic acid biosynthesis                                          |          |
| 2558669379 | DRAFT_00047 | Metacyc        | PWY-5973: <i>cis</i>-vaccenate biosynthesis                                       |          |
| 2558669379 | DRAFT_00047 | Metacyc        | PWY-6282: palmitoleate biosynthesis I                                             |          |
| 2558669379 | DRAFT_00047 | Metacyc        | PWY-6951: docosahexanoate biosynthesis II                                         |          |
| 2558669379 | DRAFT_00047 | Metacyc        | PWYG-321: mycolate biosynthesis                                                   |          |
| 2558669379 | DRAFT_00047 | Metacyc        | PWY-6519: 7-keto-8-aminopelargonate biosynthesis I                                |          |
| 2558669379 | DRAFT_00047 | Metacyc        | PWY0-862: <i>cis</i>-dodecenoyl biosynthesis                                      |          |
| 2558669379 | DRAFT_00047 | Metacyc        | PWY-7053: docosahexanoate biosynthesis I                                          |          |
| 2558669379 | DRAFT_00047 | COG_category   | [Q] Secondary metabolites biosynthesis, transport and catabolism                  |          |
| 2558669379 | DRAFT_00047 | COG_category   | [I] Lipid transport and metabolism                                                |          |
| 2558669379 | DRAFT_00047 | COG_category   | [R] General function prediction only                                              |          |
| 2558669379 | DRAFT_00047 | COG1028        | Dehydrogenases with different specificities (related to short-chain alco          | 9.00E-43 |
| 2558669379 | DRAFT_00047 | pfam00106      | adh_short                                                                         | 5.60E-30 |
| 2558669379 | DRAFT_00047 | EC:1.1.1.100   | 3-oxoacyl-[acyl-carrier-protein] reductase.                                       |          |
| 2558669379 | DRAFT_00047 | KO:K00059      | 3-oxoacyl-[acyl-carrier protein] reductase [EC:1.1.1.100]                         | 0.00E+00 |
| 2558669379 | DRAFT_00047 | ITERM:00597    | 3-oxoacyl-[acyl-carrier-protein] reductase (EC 1.1.1.100)                         |          |
| 2558669379 | DRAFT_00047 | Locus_type     | CDS                                                                               |          |
| 2558669379 | DRAFT_00047 | Product_name   | 3-oxoacyl-[acyl-carrier-protein] reductase (EC 1.1.1.100)                         |          |
| 2558669379 | DRAFT_00047 | Scaffold       | DRAFT_contig_70_5_len_108223_read_count_1902626.1                                 |          |
| 2558669379 | DRAFT_00047 | Coordinates    | 32567..33313(-)                                                                   |          |
| 2558669379 | DRAFT_00047 | DNA_length     | 747bp                                                                             |          |

|            |             |                |                                                                         |          |
|------------|-------------|----------------|-------------------------------------------------------------------------|----------|
| 2558669379 | DRAFT_00047 | Protein_length | 248aa                                                                   |          |
| 2558669379 | DRAFT_00047 | GC             |                                                                         | 0.59     |
| 2558669380 | DRAFT_00048 | KEGG_module    | M00021: Cysteine biosynthesis, serine => cysteine                       |          |
| 2558669380 | DRAFT_00048 | Metacyc        | CYSTSYN-PWY: cysteine biosynthesis I                                    |          |
| 2558669380 | DRAFT_00048 | Metacyc        | PWY-6936: seleno-amino acid biosynthesis                                |          |
| 2558669380 | DRAFT_00048 | COG_category   | [E] Amino acid transport and metabolism                                 |          |
| 2558669380 | DRAFT_00048 | COG0031        | Cysteine synthase                                                       | 1.00E-65 |
| 2558669380 | DRAFT_00048 | pfam00291      | PALP                                                                    | 2.80E-43 |
| 2558669380 | DRAFT_00048 | EC:2.5.1.47    | Cysteine synthase.                                                      |          |
| 2558669380 | DRAFT_00048 | KO:K01738      | cysteine synthase A [EC:2.5.1.47]                                       | 0.00E+00 |
| 2558669380 | DRAFT_00048 | Locus_type     | CDS                                                                     |          |
| 2558669380 | DRAFT_00048 | Product_name   | Cysteine synthase                                                       |          |
| 2558669380 | DRAFT_00048 | Scaffold       | DRAFT_contig_70_5_len_108223_read_count_1902626.1                       |          |
| 2558669380 | DRAFT_00048 | Coordinates    | 33666..34538(+)                                                         |          |
| 2558669380 | DRAFT_00048 | DNA_length     | 873bp                                                                   |          |
| 2558669380 | DRAFT_00048 | Protein_length | 290aa                                                                   |          |
| 2558669380 | DRAFT_00048 | GC             |                                                                         | 0.53     |
| 2558669381 | DRAFT_00049 | COG_category   | [R] General function prediction only                                    |          |
| 2558669381 | DRAFT_00049 | COG1011        | Predicted hydrolase (HAD superfamily)                                   | 3.00E-24 |
| 2558669381 | DRAFT_00049 | pfam13419      | HAD_2                                                                   | 8.10E-27 |
| 2558669381 | DRAFT_00049 | TIGR01509      | haloacid dehalogenase superfamily, subfamily IA, variant 3 with third n | 5.60E-13 |
| 2558669381 | DRAFT_00049 | TIGR01549      | haloacid dehalogenase superfamily, subfamily IA, variant 1 with third n | 7.70E-11 |
| 2558669381 | DRAFT_00049 | Locus_type     | CDS                                                                     |          |
| 2558669381 | DRAFT_00049 | Product_name   | haloacid dehalogenase superfamily, subfamily IA, variant 3 with third   |          |
| 2558669381 | DRAFT_00049 | Scaffold       | DRAFT_contig_70_5_len_108223_read_count_1902626.1                       |          |
| 2558669381 | DRAFT_00049 | Coordinates    | 34722..35486(-)                                                         |          |
| 2558669381 | DRAFT_00049 | DNA_length     | 765bp                                                                   |          |
| 2558669381 | DRAFT_00049 | Protein_length | 254aa                                                                   |          |
| 2558669381 | DRAFT_00049 | GC             |                                                                         | 0.54     |
| 2558669382 | DRAFT_00050 | COG_category   | [S] Function unknown                                                    |          |
| 2558669382 | DRAFT_00050 | COG0432        | Uncharacterized conserved protein                                       | 1.00E-39 |

|            |             |                |                                                              |          |
|------------|-------------|----------------|--------------------------------------------------------------|----------|
| 2558669382 | DRAFT_00050 | pfam01894      | UPF0047                                                      | 3.30E-35 |
| 2558669382 | DRAFT_00050 | TIGR00149      | secondary thiamine-phosphate synthase enzyme                 | 2.10E-36 |
| 2558669382 | DRAFT_00050 | Locus_type     | CDS                                                          |          |
| 2558669382 | DRAFT_00050 | Product_name   | secondary thiamine-phosphate synthase enzyme                 |          |
| 2558669382 | DRAFT_00050 | Scaffold       | DRAFT_contig_70_5_len_108223_read_count_1902626.1            |          |
| 2558669382 | DRAFT_00050 | Coordinates    | 35697..36170(-)                                              |          |
| 2558669382 | DRAFT_00050 | DNA_length     | 474bp                                                        |          |
| 2558669382 | DRAFT_00050 | Protein_length | 157aa                                                        |          |
| 2558669382 | DRAFT_00050 | GC             |                                                              | 0.55     |
| 2558669383 | DRAFT_00051 | Metacyc        | PWY-6482: diphthamide biosynthesis                           |          |
| 2558669383 | DRAFT_00051 | COG_category   | [J] Translation, ribosomal structure and biogenesis          |          |
| 2558669383 | DRAFT_00051 | COG1798        | Diphthamide biosynthesis methyltransferase                   | 3.00E-59 |
| 2558669383 | DRAFT_00051 | pfam00590      | TP_methylase                                                 | 3.50E-20 |
| 2558669383 | DRAFT_00051 | pfam04010      | DUF357                                                       | 3.20E-12 |
| 2558669383 | DRAFT_00051 | EC:2.1.1.98    | Diphthine synthase.                                          |          |
| 2558669383 | DRAFT_00051 | TIGR00522      | diphthine synthase                                           | 2.10E-60 |
| 2558669383 | DRAFT_00051 | KO:K00586      | diphthine synthase [EC:2.1.1.98]                             | 0.00E+00 |
| 2558669383 | DRAFT_00051 | Locus_type     | CDS                                                          |          |
| 2558669383 | DRAFT_00051 | Product_name   | diphthine synthase                                           |          |
| 2558669383 | DRAFT_00051 | Scaffold       | DRAFT_contig_70_5_len_108223_read_count_1902626.1            |          |
| 2558669383 | DRAFT_00051 | Coordinates    | 36548..37588(+)                                              |          |
| 2558669383 | DRAFT_00051 | DNA_length     | 1041bp                                                       |          |
| 2558669383 | DRAFT_00051 | Protein_length | 346aa                                                        |          |
| 2558669383 | DRAFT_00051 | GC             |                                                              | 0.56     |
| 2558669384 | DRAFT_00052 | Metacyc        | TEICHOICACID-PWY: teichoic acid (poly-glycerol) biosynthesis |          |
| 2558669384 | DRAFT_00052 | COG_category   | [I] Lipid transport and metabolism                           |          |
| 2558669384 | DRAFT_00052 | COG_category   | [M] Cell wall/membrane/envelope biogenesis                   |          |
| 2558669384 | DRAFT_00052 | COG0615        | Cytidylyltransferase                                         | 1.00E-24 |
| 2558669384 | DRAFT_00052 | pfam01467      | CTP_transf_2                                                 | 1.80E-08 |
| 2558669384 | DRAFT_00052 | EC:2.7.7.39    | Glycerol-3-phosphate cytidylyltransferase.                   |          |
| 2558669384 | DRAFT_00052 | TIGR00125      | cytidyltransferase-like domain                               | 2.70E-16 |
| 2558669384 | DRAFT_00052 | KO:K00980      | glycerol-3-phosphate cytidylyltransferase [EC:2.7.7.39]      | 2.20E-30 |

|            |             |                |                                                      |          |
|------------|-------------|----------------|------------------------------------------------------|----------|
| 2558669384 | DRAFT_00052 | Locus_type     | CDS                                                  |          |
| 2558669384 | DRAFT_00052 | Product_name   | cytidyltransferase-like domain                       |          |
| 2558669384 | DRAFT_00052 | Scaffold       | DRAFT_contig_70_5_len_108223_read_count_1902626.1    |          |
| 2558669384 | DRAFT_00052 | Coordinates    | 37591..38190(+)                                      |          |
| 2558669384 | DRAFT_00052 | DNA_length     | 600bp                                                |          |
| 2558669384 | DRAFT_00052 | Protein_length | 199aa                                                |          |
| 2558669384 | DRAFT_00052 | GC             |                                                      | 0.56     |
| 2558669385 | DRAFT_00053 | COG_category   | [J] Translation, ribosomal structure and biogenesis  |          |
| 2558669385 | DRAFT_00053 | COG2178        | Predicted RNA-binding protein of the translin family | 4.00E-29 |
| 2558669385 | DRAFT_00053 | pfam01997      | Translin                                             | 3.00E-25 |
| 2558669385 | DRAFT_00053 | KO:K07477      | translin                                             | 1.10E-40 |
| 2558669385 | DRAFT_00053 | Locus_type     | CDS                                                  |          |
| 2558669385 | DRAFT_00053 | Product_name   | Predicted RNA-binding protein of the translin family |          |
| 2558669385 | DRAFT_00053 | Scaffold       | DRAFT_contig_70_5_len_108223_read_count_1902626.1    |          |
| 2558669385 | DRAFT_00053 | Coordinates    | 38187..38819(-)                                      |          |
| 2558669385 | DRAFT_00053 | DNA_length     | 633bp                                                |          |
| 2558669385 | DRAFT_00053 | Protein_length | 210aa                                                |          |
| 2558669385 | DRAFT_00053 | GC             |                                                      | 0.58     |
| 2558669386 | DRAFT_00054 | pfam00892      | EamA                                                 | 6.00E-19 |
| 2558669386 | DRAFT_00054 | pfam00892      | EamA                                                 | 7.40E-18 |
| 2558669386 | DRAFT_00054 | Locus_type     | CDS                                                  |          |
| 2558669386 | DRAFT_00054 | Product_name   | Predicted permease, DMT superfamily                  |          |
| 2558669386 | DRAFT_00054 | Scaffold       | DRAFT_contig_70_5_len_108223_read_count_1902626.1    |          |
| 2558669386 | DRAFT_00054 | Coordinates    | 38910..39842(+)                                      |          |
| 2558669386 | DRAFT_00054 | DNA_length     | 933bp                                                |          |
| 2558669386 | DRAFT_00054 | Protein_length | 310aa                                                |          |
| 2558669386 | DRAFT_00054 | GC             |                                                      | 0.59     |
| 2558669386 | DRAFT_00054 | Transmembrane  | Yes                                                  |          |
| 2558669387 | DRAFT_00055 | pfam01870      | Hjc                                                  | 1.50E-11 |
| 2558669387 | DRAFT_00055 | KO:K03552      | holliday junction resolvase, archaea type            | 5.10E-06 |
| 2558669387 | DRAFT_00055 | Locus_type     | CDS                                                  |          |

|            |             |                |                                                   |          |
|------------|-------------|----------------|---------------------------------------------------|----------|
| 2558669387 | DRAFT_00055 | Product_name   | Holliday junction resolvase - archaeal type       |          |
| 2558669387 | DRAFT_00055 | Scaffold       | DRAFT_contig_70_5_len_108223_read_count_1902626.1 |          |
| 2558669387 | DRAFT_00055 | Coordinates    | 39846..40154(+)                                   |          |
| 2558669387 | DRAFT_00055 | DNA_length     | 309bp                                             |          |
| 2558669387 | DRAFT_00055 | Protein_length | 102aa                                             |          |
| 2558669387 | DRAFT_00055 | GC             |                                                   | 0.58     |
|            |             |                |                                                   |          |
| 2558669388 | DRAFT_00056 | Locus_type     | CDS                                               |          |
| 2558669388 | DRAFT_00056 | Product_name   | hypothetical protein                              |          |
| 2558669388 | DRAFT_00056 | Scaffold       | DRAFT_contig_70_5_len_108223_read_count_1902626.1 |          |
| 2558669388 | DRAFT_00056 | Coordinates    | 40151..40300(+)                                   |          |
| 2558669388 | DRAFT_00056 | DNA_length     | 150bp                                             |          |
| 2558669388 | DRAFT_00056 | Protein_length | 49aa                                              |          |
| 2558669388 | DRAFT_00056 | GC             |                                                   | 0.51     |
|            |             |                |                                                   |          |
| 2558669389 | DRAFT_00057 | Locus_type     | CDS                                               |          |
| 2558669389 | DRAFT_00057 | Product_name   | hypothetical protein                              |          |
| 2558669389 | DRAFT_00057 | Scaffold       | DRAFT_contig_70_5_len_108223_read_count_1902626.1 |          |
| 2558669389 | DRAFT_00057 | Coordinates    | 40310..40669(-)                                   |          |
| 2558669389 | DRAFT_00057 | DNA_length     | 360bp                                             |          |
| 2558669389 | DRAFT_00057 | Protein_length | 119aa                                             |          |
| 2558669389 | DRAFT_00057 | GC             |                                                   | 0.59     |
|            |             |                |                                                   |          |
| 2558669390 | DRAFT_00058 | Metacyc        | PWY-5386: methylglyoxal degradation I             |          |
| 2558669390 | DRAFT_00058 | COG_category   | [R] General function prediction only              |          |
| 2558669390 | DRAFT_00058 | COG0491        | Zn-dependent hydrolases, including glyoxylases    | 7.00E-20 |
| 2558669390 | DRAFT_00058 | pfam00753      | Lactamase_B                                       | 1.70E-21 |
| 2558669390 | DRAFT_00058 | EC:3.1.2.6     | Hydroxyacylglutathione hydrolase.                 |          |
| 2558669390 | DRAFT_00058 | KO:K01069      | hydroxyacylglutathione hydrolase [EC:3.1.2.6]     | 2.70E-35 |
| 2558669390 | DRAFT_00058 | Locus_type     | CDS                                               |          |
| 2558669390 | DRAFT_00058 | Product_name   | Zn-dependent hydrolases, including glyoxylases    |          |
| 2558669390 | DRAFT_00058 | Scaffold       | DRAFT_contig_70_5_len_108223_read_count_1902626.1 |          |
| 2558669390 | DRAFT_00058 | Coordinates    | 40943..41542(+)                                   |          |
| 2558669390 | DRAFT_00058 | DNA_length     | 600bp                                             |          |



|            |             |                |                                                                            |          |
|------------|-------------|----------------|----------------------------------------------------------------------------|----------|
| 2558669390 | DRAFT_00058 | Protein_length | 199aa                                                                      |          |
| 2558669390 | DRAFT_00058 | GC             |                                                                            | 0.54     |
| 2558669391 | DRAFT_00059 | KEGG_module    | M00570: Isoleucine biosynthesis, threonine => 2-oxobutanoate => isoleucine |          |
| 2558669391 | DRAFT_00059 | Metacyc        | PWY-5437: threonine degradation I                                          |          |
| 2558669391 | DRAFT_00059 | Metacyc        | ILEUSYN-PWY: isoleucine biosynthesis I (from threonine)                    |          |
| 2558669391 | DRAFT_00059 | Metacyc        | PWY-5826: hypoglycin biosynthesis                                          |          |
| 2558669391 | DRAFT_00059 | COG_category   | [E] Amino acid transport and metabolism                                    |          |
| 2558669391 | DRAFT_00059 | COG1171        | Threonine dehydratase                                                      | 2.00E-86 |
| 2558669391 | DRAFT_00059 | pfam00291      | PALP                                                                       | 5.70E-72 |
| 2558669391 | DRAFT_00059 | EC:4.3.1.19    | Threonine ammonia-lyase.                                                   |          |
| 2558669391 | DRAFT_00059 | KO:K01754      | threonine dehydratase [EC:4.3.1.19]                                        | 0.00E+00 |
| 2558669391 | DRAFT_00059 | Locus_type     | CDS                                                                        |          |
| 2558669391 | DRAFT_00059 | Product_name   | Threonine dehydratase                                                      |          |
| 2558669391 | DRAFT_00059 | Scaffold       | DRAFT_contig_70_5_len_108223_read_count_1902626.1                          |          |
| 2558669391 | DRAFT_00059 | Coordinates    | 41424..42509(-)                                                            |          |
| 2558669391 | DRAFT_00059 | DNA_length     | 1086bp                                                                     |          |
| 2558669391 | DRAFT_00059 | Protein_length | 361aa                                                                      |          |
| 2558669391 | DRAFT_00059 | GC             |                                                                            | 0.58     |
| 2558669392 | DRAFT_00060 | Metacyc        | P303-PWY: ammonia oxidation II (anaerobic)                                 |          |
| 2558669392 | DRAFT_00060 | IMG_pathway    | 437: Archaeal replication elongation                                       |          |
| 2558669392 | DRAFT_00060 | COG_category   | [L] Replication, recombination and repair                                  |          |
| 2558669392 | DRAFT_00060 | COG0258        | 5'-3' exonuclease (including N-terminal domain of PolI)                    | 7.00E-40 |
| 2558669392 | DRAFT_00060 | pfam00752      | XPG_N                                                                      | 1.00E-16 |
| 2558669392 | DRAFT_00060 | pfam00867      | XPG_I                                                                      | 8.70E-26 |
| 2558669392 | DRAFT_00060 | EC:3.-         | Hydrolases.                                                                |          |
| 2558669392 | DRAFT_00060 | TIGR03674      | flap structure-specific endonuclease                                       | 0.00E+00 |
| 2558669392 | DRAFT_00060 | KO:K04799      | flap endonuclease-1 [EC:3.-.-.]                                            | 0.00E+00 |
| 2558669392 | DRAFT_00060 | ITERM:00111    | flap endonuclease 1 (EC 3.1.-.-)                                           |          |
| 2558669392 | DRAFT_00060 | Locus_type     | CDS                                                                        |          |
| 2558669392 | DRAFT_00060 | Product_name   | flap endonuclease 1 (EC 3.1.-.-)                                           |          |
| 2558669392 | DRAFT_00060 | Scaffold       | DRAFT_contig_70_5_len_108223_read_count_1902626.1                          |          |
| 2558669392 | DRAFT_00060 | Coordinates    | 42497..43522(-)                                                            |          |

|            |             |                |                                                     |          |
|------------|-------------|----------------|-----------------------------------------------------|----------|
| 2558669392 | DRAFT_00060 | DNA_length     | 1026bp                                              |          |
| 2558669392 | DRAFT_00060 | Protein_length | 341aa                                               |          |
| 2558669392 | DRAFT_00060 | GC             |                                                     | 0.57     |
| 2558669393 | DRAFT_00061 | Locus_type     | CDS                                                 |          |
| 2558669393 | DRAFT_00061 | Product_name   | hypothetical protein                                |          |
| 2558669393 | DRAFT_00061 | Scaffold       | DRAFT_contig_70_5_len_108223_read_count_1902626.1   |          |
| 2558669393 | DRAFT_00061 | Coordinates    | 43551..43799(-)                                     |          |
| 2558669393 | DRAFT_00061 | DNA_length     | 249bp                                               |          |
| 2558669393 | DRAFT_00061 | Protein_length | 82aa                                                |          |
| 2558669393 | DRAFT_00061 | GC             |                                                     | 0.56     |
| 2558669394 | DRAFT_00062 | COG_category   | [J] Translation, ribosomal structure and biogenesis |          |
| 2558669394 | DRAFT_00062 | COG2092        | Translation elongation factor EF-1beta              | 1.00E-09 |
| 2558669394 | DRAFT_00062 | pfam00736      | EF1_GNE                                             | 1.70E-09 |
| 2558669394 | DRAFT_00062 | TIGR00489      | translation elongation factor aEF-1 beta            | 1.30E-18 |
| 2558669394 | DRAFT_00062 | KO:K03232      | elongation factor 1-beta                            | 7.10E-11 |
| 2558669394 | DRAFT_00062 | Locus_type     | CDS                                                 |          |
| 2558669394 | DRAFT_00062 | Product_name   | Translation elongation factor EF-1beta              |          |
| 2558669394 | DRAFT_00062 | Scaffold       | DRAFT_contig_70_5_len_108223_read_count_1902626.1   |          |
| 2558669394 | DRAFT_00062 | Coordinates    | 43874..44158(-)                                     |          |
| 2558669394 | DRAFT_00062 | DNA_length     | 285bp                                               |          |
| 2558669394 | DRAFT_00062 | Protein_length | 94aa                                                |          |
| 2558669394 | DRAFT_00062 | GC             |                                                     | 0.55     |
| 2558669395 | DRAFT_00063 | COG_category   | [C] Energy production and conversion                |          |
| 2558669395 | DRAFT_00063 | COG0644        | Dehydrogenases (flavoproteins)                      | 8.00E-45 |
| 2558669395 | DRAFT_00063 | pfam12831      | FAD_oxidored                                        | 6.00E-10 |
| 2558669395 | DRAFT_00063 | TIGR02032      | geranylgeranyl reductase family                     | 2.60E-49 |
| 2558669395 | DRAFT_00063 | Locus_type     | CDS                                                 |          |
| 2558669395 | DRAFT_00063 | Product_name   | Dehydrogenases (flavoproteins)                      |          |
| 2558669395 | DRAFT_00063 | Scaffold       | DRAFT_contig_70_5_len_108223_read_count_1902626.1   |          |
| 2558669395 | DRAFT_00063 | Coordinates    | 44379..45557(-)                                     |          |
| 2558669395 | DRAFT_00063 | DNA_length     | 1179bp                                              |          |

|            |             |                |                                                        |          |
|------------|-------------|----------------|--------------------------------------------------------|----------|
| 2558669395 | DRAFT_00063 | Protein_length | 392aa                                                  |          |
| 2558669395 | DRAFT_00063 | GC             |                                                        | 0.6      |
| 2558669396 | DRAFT_00064 | Metacyc        | PWY490-4: asparagine biosynthesis III (tRNA-dependent) |          |
| 2558669396 | DRAFT_00064 | COG_category   | [S] Function unknown                                   |          |
| 2558669396 | DRAFT_00064 | COG1990        | Uncharacterized conserved protein                      | 6.00E-35 |
| 2558669396 | DRAFT_00064 | pfam01981      | PTH2                                                   | 9.40E-47 |
| 2558669396 | DRAFT_00064 | EC:3.1.1.29    | Aminoacyl-tRNA hydrolase.                              |          |
| 2558669396 | DRAFT_00064 | TIGR00283      | peptidyl-tRNA hydrolase                                | 4.50E-47 |
| 2558669396 | DRAFT_00064 | KO:K04794      | peptidyl-tRNA hydrolase, PTH2 family [EC:3.1.1.29]     | 2.00E-31 |
| 2558669396 | DRAFT_00064 | ITERM:02547    | peptidyl-tRNA hydrolase (EC 3.1.1.29)                  |          |
| 2558669396 | DRAFT_00064 | Locus_type     | CDS                                                    |          |
| 2558669396 | DRAFT_00064 | Product_name   | peptidyl-tRNA hydrolase (EC 3.1.1.29)                  |          |
| 2558669396 | DRAFT_00064 | Scaffold       | DRAFT_contig_70_5_len_108223_read_count_1902626.1      |          |
| 2558669396 | DRAFT_00064 | Coordinates    | 45620..45967(+)                                        |          |
| 2558669396 | DRAFT_00064 | DNA_length     | 348bp                                                  |          |
| 2558669396 | DRAFT_00064 | Protein_length | 115aa                                                  |          |
| 2558669396 | DRAFT_00064 | GC             |                                                        | 0.56     |
| 2558669397 | DRAFT_00065 | COG_category   | [S] Function unknown                                   |          |
| 2558669397 | DRAFT_00065 | COG0585        | Uncharacterized conserved protein                      | 2.00E-44 |
| 2558669397 | DRAFT_00065 | pfam01142      | TruD                                                   | 5.00E-60 |
| 2558669397 | DRAFT_00065 | EC:5.4.99.27   | tRNA pseudouridine(13) synthase.                       |          |
| 2558669397 | DRAFT_00065 | TIGR00094      | tRNA pseudouridine synthase, TruD family               | 6.30E-53 |
| 2558669397 | DRAFT_00065 | KO:K06176      | tRNA pseudouridine13 synthase [EC:5.4.99.27]           | 0.00E+00 |
| 2558669397 | DRAFT_00065 | Locus_type     | CDS                                                    |          |
| 2558669397 | DRAFT_00065 | Product_name   | Uncharacterized conserved protein                      |          |
| 2558669397 | DRAFT_00065 | Scaffold       | DRAFT_contig_70_5_len_108223_read_count_1902626.1      |          |
| 2558669397 | DRAFT_00065 | Coordinates    | 45964..47232(+)                                        |          |
| 2558669397 | DRAFT_00065 | DNA_length     | 1269bp                                                 |          |
| 2558669397 | DRAFT_00065 | Protein_length | 422aa                                                  |          |
| 2558669397 | DRAFT_00065 | GC             |                                                        | 0.6      |
| 2558669398 | DRAFT_00066 | Metacyc        | THIOREDOX-PWY: thioredoxin pathway                     |          |

|            |             |                |                                                                  |          |
|------------|-------------|----------------|------------------------------------------------------------------|----------|
| 2558669398 | DRAFT_00066 | COG_category   | [O] Posttranslational modification, protein turnover, chaperones |          |
| 2558669398 | DRAFT_00066 | COG0492        | Thioredoxin reductase                                            | 2.00E-54 |
| 2558669398 | DRAFT_00066 | pfam07992      | Pyr_redox_2                                                      | 4.20E-18 |
| 2558669398 | DRAFT_00066 | pfam00070      | Pyr_redox                                                        | 4.20E-11 |
| 2558669398 | DRAFT_00066 | EC:1.8.1.9     | Thioredoxin-disulfide reductase.                                 |          |
| 2558669398 | DRAFT_00066 | KO:K00384      | thioredoxin reductase (NADPH) [EC:1.8.1.9]                       | 0.00E+00 |
| 2558669398 | DRAFT_00066 | Locus_type     | CDS                                                              |          |
| 2558669398 | DRAFT_00066 | Product_name   | Thioredoxin reductase                                            |          |
| 2558669398 | DRAFT_00066 | Scaffold       | DRAFT_contig_70_5_len_108223_read_count_1902626.1                |          |
| 2558669398 | DRAFT_00066 | Coordinates    | 47280..48275(+)                                                  |          |
| 2558669398 | DRAFT_00066 | DNA_length     | 996bp                                                            |          |
| 2558669398 | DRAFT_00066 | Protein_length | 331aa                                                            |          |
| 2558669398 | DRAFT_00066 | GC             |                                                                  | 0.57     |
| 2558669399 | DRAFT_00067 | KEGG_module    | M00179: Ribosome, archaea                                        |          |
| 2558669399 | DRAFT_00067 | KEGG_module    | M00177: Ribosome, eukaryotes                                     |          |
| 2558669399 | DRAFT_00067 | COG_category   | [J] Translation, ribosomal structure and biogenesis              |          |
| 2558669399 | DRAFT_00067 | COG1632        | Ribosomal protein L15E                                           | 1.00E-31 |
| 2558669399 | DRAFT_00067 | pfam00827      | Ribosomal_L15e                                                   | 2.30E-46 |
| 2558669399 | DRAFT_00067 | KO:K02877      | large subunit ribosomal protein L15e                             | 1.10E-40 |
| 2558669399 | DRAFT_00067 | ITERM:00233    | LSU ribosomal protein L15E                                       |          |
| 2558669399 | DRAFT_00067 | Locus_type     | CDS                                                              |          |
| 2558669399 | DRAFT_00067 | Product_name   | LSU ribosomal protein L15E                                       |          |
| 2558669399 | DRAFT_00067 | Scaffold       | DRAFT_contig_70_5_len_108223_read_count_1902626.1                |          |
| 2558669399 | DRAFT_00067 | Coordinates    | 48278..48733(-)                                                  |          |
| 2558669399 | DRAFT_00067 | DNA_length     | 456bp                                                            |          |
| 2558669399 | DRAFT_00067 | Protein_length | 151aa                                                            |          |
| 2558669399 | DRAFT_00067 | GC             |                                                                  | 0.6      |
| 2558669400 | DRAFT_00068 | KEGG_module    | M00020: Serine biosynthesis, glycerate-3P => serine              |          |
| 2558669400 | DRAFT_00068 | Metacyc        | SERSYN-PWY: serine biosynthesis                                  |          |
| 2558669400 | DRAFT_00068 | COG_category   | [E] Amino acid transport and metabolism                          |          |
| 2558669400 | DRAFT_00068 | COG_category   | [H] Coenzyme transport and metabolism                            |          |
| 2558669400 | DRAFT_00068 | COG0111        | Phosphoglycerate dehydrogenase and related dehydrogenases        | 4.00E-80 |

|            |             |                |                                                           |           |
|------------|-------------|----------------|-----------------------------------------------------------|-----------|
| 2558669400 | DRAFT_00068 | pfam02826      | 2-Hacid_dh_C                                              | 4.50E-62  |
| 2558669400 | DRAFT_00068 | pfam00389      | 2-Hacid_dh                                                | 6.60E-30  |
| 2558669400 | DRAFT_00068 | EC:1.1.1.95    | Phosphoglycerate dehydrogenase.                           |           |
| 2558669400 | DRAFT_00068 | TIGR01327      | D-3-phosphoglycerate dehydrogenase                        | 2.80E-104 |
| 2558669400 | DRAFT_00068 | KO:K00058      | D-3-phosphoglycerate dehydrogenase [EC:1.1.1.95]          | 0.00E+00  |
| 2558669400 | DRAFT_00068 | Locus_type     | CDS                                                       |           |
| 2558669400 | DRAFT_00068 | Product_name   | Phosphoglycerate dehydrogenase and related dehydrogenases |           |
| 2558669400 | DRAFT_00068 | Scaffold       | DRAFT_contig_70_5_len_108223_read_count_1902626.1         |           |
| 2558669400 | DRAFT_00068 | Coordinates    | 48784..49716(-)                                           |           |
| 2558669400 | DRAFT_00068 | DNA_length     | 933bp                                                     |           |
| 2558669400 | DRAFT_00068 | Protein_length | 310aa                                                     |           |
| 2558669400 | DRAFT_00068 | GC             |                                                           | 0.58      |
| 2558669401 | DRAFT_00069 | COG_category   | [J] Translation, ribosomal structure and biogenesis       |           |
| 2558669401 | DRAFT_00069 | COG0012        | Predicted GTPase, probable translation factor             | 4.00E-87  |
| 2558669401 | DRAFT_00069 | pfam08438      | MMR_HSR1_C                                                | 3.20E-31  |
| 2558669401 | DRAFT_00069 | pfam01926      | MMR_HSR1                                                  | 5.40E-17  |
| 2558669401 | DRAFT_00069 | pfam02824      | TGS                                                       | 5.70E-10  |
| 2558669401 | DRAFT_00069 | Locus_type     | CDS                                                       |           |
| 2558669401 | DRAFT_00069 | Product_name   | GTP-binding conserved hypothetical protein TIGR00650      |           |
| 2558669401 | DRAFT_00069 | Scaffold       | DRAFT_contig_70_5_len_108223_read_count_1902626.1         |           |
| 2558669401 | DRAFT_00069 | Coordinates    | 49879..51084(+)                                           |           |
| 2558669401 | DRAFT_00069 | DNA_length     | 1206bp                                                    |           |
| 2558669401 | DRAFT_00069 | Protein_length | 401aa                                                     |           |
| 2558669401 | DRAFT_00069 | GC             |                                                           | 0.57      |
| 2558669402 | DRAFT_00070 | KEGG_module    | M00179: Ribosome, archaea                                 |           |
| 2558669402 | DRAFT_00070 | KEGG_module    | M00177: Ribosome, eukaryotes                              |           |
| 2558669402 | DRAFT_00070 | COG_category   | [J] Translation, ribosomal structure and biogenesis       |           |
| 2558669402 | DRAFT_00070 | COG1890        | Ribosomal protein S3AE                                    | 8.00E-45  |
| 2558669402 | DRAFT_00070 | pfam01015      | Ribosomal_S3Ae                                            | 2.90E-54  |
| 2558669402 | DRAFT_00070 | KO:K02984      | small subunit ribosomal protein S3Ae                      | 0.00E+00  |
| 2558669402 | DRAFT_00070 | Locus_type     | CDS                                                       |           |
| 2558669402 | DRAFT_00070 | Product_name   | Ribosomal protein S3AE                                    |           |

|            |             |                |                                                                   |          |
|------------|-------------|----------------|-------------------------------------------------------------------|----------|
| 2558669402 | DRAFT_00070 | Scaffold       | DRAFT_contig_70_5_len_108223_read_count_1902626.1                 |          |
| 2558669402 | DRAFT_00070 | Coordinates    | 51064..51687(-)                                                   |          |
| 2558669402 | DRAFT_00070 | DNA_length     | 624bp                                                             |          |
| 2558669402 | DRAFT_00070 | Protein_length | 207aa                                                             |          |
| 2558669402 | DRAFT_00070 | GC             |                                                                   | 0.55     |
| 2558669403 | DRAFT_00071 | KEGG_module    | M00360: Aminoacyl-tRNA biosynthesis, prokaryotes                  |          |
| 2558669403 | DRAFT_00071 | KEGG_module    | M00359: Aminoacyl-tRNA biosynthesis, eukaryotes                   |          |
| 2558669403 | DRAFT_00071 | Metacyc        | PWY0-901: selenocysteine biosynthesis I (bacteria)                |          |
| 2558669403 | DRAFT_00071 | Metacyc        | TRNA-CHARGING-PWY: tRNA charging                                  |          |
| 2558669403 | DRAFT_00071 | Metacyc        | PWY-6281: selenocysteine biosynthesis II (archaea and eukaryotes) |          |
| 2558669403 | DRAFT_00071 | IMG_pathway    | 352: Bacterial selenocysteine synthesis                           |          |
| 2558669403 | DRAFT_00071 | IMG_pathway    | 467: Archaeal/eukaryotic selenocysteine synthesis                 |          |
| 2558669403 | DRAFT_00071 | IMG_pathway    | 503: L-serine ligation to tRNA(Ser)                               |          |
| 2558669403 | DRAFT_00071 | COG_category   | [J] Translation, ribosomal structure and biogenesis               |          |
| 2558669403 | DRAFT_00071 | COG0172        | Seryl-tRNA synthetase                                             | 0.00E+00 |
| 2558669403 | DRAFT_00071 | pfam02403      | Seryl_tRNA_N                                                      | 2.80E-23 |
| 2558669403 | DRAFT_00071 | pfam00587      | tRNA-synt_2b                                                      | 5.90E-36 |
| 2558669403 | DRAFT_00071 | EC:6.1.1.11    | Serine--tRNA ligase.                                              |          |
| 2558669403 | DRAFT_00071 | TIGR00414      | seryl-tRNA synthetase                                             | 0.00E+00 |
| 2558669403 | DRAFT_00071 | KO:K01875      | seryl-tRNA synthetase [EC:6.1.1.11]                               | 0.00E+00 |
| 2558669403 | DRAFT_00071 | ITERM:00388    | seryl-tRNA synthetase (EC 6.1.1.11)                               |          |
| 2558669403 | DRAFT_00071 | Locus_type     | CDS                                                               |          |
| 2558669403 | DRAFT_00071 | Product_name   | seryl-tRNA synthetase (EC 6.1.1.11)                               |          |
| 2558669403 | DRAFT_00071 | Scaffold       | DRAFT_contig_70_5_len_108223_read_count_1902626.1                 |          |
| 2558669403 | DRAFT_00071 | Coordinates    | 51722..53002(-)                                                   |          |
| 2558669403 | DRAFT_00071 | DNA_length     | 1281bp                                                            |          |
| 2558669403 | DRAFT_00071 | Protein_length | 426aa                                                             |          |
| 2558669403 | DRAFT_00071 | GC             |                                                                   | 0.57     |
| 2558669404 | DRAFT_00072 | Locus_type     | CDS                                                               |          |
| 2558669404 | DRAFT_00072 | Product_name   | hypothetical protein                                              |          |
| 2558669404 | DRAFT_00072 | Scaffold       | DRAFT_contig_70_5_len_108223_read_count_1902626.1                 |          |
| 2558669404 | DRAFT_00072 | Coordinates    | 53024..53278(-)                                                   |          |

|            |             |                |                                                     |          |
|------------|-------------|----------------|-----------------------------------------------------|----------|
| 2558669404 | DRAFT_00072 | DNA_length     | 255bp                                               |          |
| 2558669404 | DRAFT_00072 | Protein_length | 84aa                                                |          |
| 2558669404 | DRAFT_00072 | GC             |                                                     | 0.56     |
| 2558669405 | DRAFT_00073 | COG_category   | [L] Replication, recombination and repair           |          |
| 2558669405 | DRAFT_00073 | COG0608        | Single-stranded DNA-specific exonuclease            | 3.00E-38 |
| 2558669405 | DRAFT_00073 | pfam01368      | DHH                                                 | 2.40E-10 |
| 2558669405 | DRAFT_00073 | pfam02272      | DHHA1                                               | 2.30E-10 |
| 2558669405 | DRAFT_00073 | KO:K07463      | archaea-specific RecJ-like exonuclease              | 0.00E+00 |
| 2558669405 | DRAFT_00073 | Locus_type     | CDS                                                 |          |
| 2558669405 | DRAFT_00073 | Product_name   | Single-stranded DNA-specific exonuclease            |          |
| 2558669405 | DRAFT_00073 | Scaffold       | DRAFT_contig_70_5_len_108223_read_count_1902626.1   |          |
| 2558669405 | DRAFT_00073 | Coordinates    | 53275..54684(-)                                     |          |
| 2558669405 | DRAFT_00073 | DNA_length     | 1410bp                                              |          |
| 2558669405 | DRAFT_00073 | Protein_length | 469aa                                               |          |
| 2558669405 | DRAFT_00073 | GC             |                                                     | 0.6      |
| 2558669406 | DRAFT_00074 | KEGG_module    | M00179: Ribosome, archaea                           |          |
| 2558669406 | DRAFT_00074 | KEGG_module    | M00178: Ribosome, bacteria                          |          |
| 2558669406 | DRAFT_00074 | COG_category   | [J] Translation, ribosomal structure and biogenesis |          |
| 2558669406 | DRAFT_00074 | COG0184        | Ribosomal protein S15P/S13E                         | 8.00E-09 |
| 2558669406 | DRAFT_00074 | pfam00312      | Ribosomal_S15                                       | 3.60E-12 |
| 2558669406 | DRAFT_00074 | pfam08069      | Ribosomal_S13_N                                     | 3.70E-23 |
| 2558669406 | DRAFT_00074 | KO:K02956      | small subunit ribosomal protein S15                 | 2.20E-43 |
| 2558669406 | DRAFT_00074 | ITERM:00304    | SSU ribosomal protein S15P                          |          |
| 2558669406 | DRAFT_00074 | Locus_type     | CDS                                                 |          |
| 2558669406 | DRAFT_00074 | Product_name   | SSU ribosomal protein S15P                          |          |
| 2558669406 | DRAFT_00074 | Scaffold       | DRAFT_contig_70_5_len_108223_read_count_1902626.1   |          |
| 2558669406 | DRAFT_00074 | Coordinates    | 54702..55151(-)                                     |          |
| 2558669406 | DRAFT_00074 | DNA_length     | 450bp                                               |          |
| 2558669406 | DRAFT_00074 | Protein_length | 149aa                                               |          |
| 2558669406 | DRAFT_00074 | GC             |                                                     | 0.59     |
| 2558669407 | DRAFT_00075 | COG_category   | [F] Nucleotide transport and metabolism             |          |

|            |             |                |                                                                                                     |          |
|------------|-------------|----------------|-----------------------------------------------------------------------------------------------------|----------|
| 2558669407 | DRAFT_00075 | COG0127        | Xanthosine triphosphate pyrophosphatase                                                             | 7.00E-40 |
| 2558669407 | DRAFT_00075 | pfam01725      | Ham1p_like                                                                                          | 2.50E-40 |
| 2558669407 | DRAFT_00075 | EC:3.6.1.19    | Nucleoside-triphosphate diphosphatase.                                                              |          |
| 2558669407 | DRAFT_00075 | TIGR00042      | non-canonical purine NTP pyrophosphatase, RdgB/HAM1 family                                          | 8.50E-48 |
| 2558669407 | DRAFT_00075 | KO:K02428      | dITP/XTP pyrophosphatase [EC:3.6.1.19]                                                              | 6.60E-40 |
| 2558669407 | DRAFT_00075 | Locus_type     | CDS                                                                                                 |          |
| 2558669407 | DRAFT_00075 | Product_name   | non-canonical purine NTP pyrophosphatase, RdgB/HAM1 family                                          |          |
| 2558669407 | DRAFT_00075 | Scaffold       | DRAFT_contig_70_5_len_108223_read_count_1902626.1                                                   |          |
| 2558669407 | DRAFT_00075 | Coordinates    | 55196..55771(-)                                                                                     |          |
| 2558669407 | DRAFT_00075 | DNA_length     | 576bp                                                                                               |          |
| 2558669407 | DRAFT_00075 | Protein_length | 191aa                                                                                               |          |
| 2558669407 | DRAFT_00075 | GC             |                                                                                                     | 0.6      |
| 2558669408 | DRAFT_00076 | Metacyc        | SPHINGOLIPID-SYN-PWY: sphingolipid biosynthesis (yeast)                                             |          |
| 2558669408 | DRAFT_00076 | Metacyc        | PWY-7077: <i>N</i>-acetyl-D-galactosamine degradation                                               |          |
| 2558669408 | DRAFT_00076 | Metacyc        | PWY-6682: dehydrophos biosynthesis                                                                  |          |
| 2558669408 | DRAFT_00076 | Metacyc        | PWY-6626: CDP-2-glycerol biosynthesis                                                               |          |
| 2558669408 | DRAFT_00076 | Metacyc        | PWY-5107: phytol salvage pathway                                                                    |          |
| 2558669408 | DRAFT_00076 | Metacyc        | PWY-5129: sphingolipid biosynthesis (plants)                                                        |          |
| 2558669408 | DRAFT_00076 | Metacyc        | LIPA-CORESYP-PWY: Lipid A-core biosynthesis                                                         |          |
| 2558669408 | DRAFT_00076 | Metacyc        | PWY-6577: farnesylcysteine salvage pathway                                                          |          |
| 2558669408 | DRAFT_00076 | COG_category   | [T] Signal transduction mechanisms                                                                  |          |
| 2558669408 | DRAFT_00076 | COG3642        | Mn <sup>2+</sup> -dependent serine/threonine protein kinase                                         | 2.00E-46 |
| 2558669408 | DRAFT_00076 | pfam00069      | Pkinase                                                                                             | 1.10E-11 |
| 2558669408 | DRAFT_00076 | EC:2.7.1.-     | Transferases. Transferring phosphorous-containing groups. Phosphotransferases with an alcohol group |          |
| 2558669408 | DRAFT_00076 | TIGR03724      | Kae1-associated kinase Bud32                                                                        | 1.20E-66 |
| 2558669408 | DRAFT_00076 | KO:K07174      | Mn <sup>2+</sup> -dependent serine/threonine protein kinase [EC:2.7.1.-]                            | 4.20E-40 |
| 2558669408 | DRAFT_00076 | Locus_type     | CDS                                                                                                 |          |
| 2558669408 | DRAFT_00076 | Product_name   | Kae1-associated kinase Bud32                                                                        |          |
| 2558669408 | DRAFT_00076 | Scaffold       | DRAFT_contig_70_5_len_108223_read_count_1902626.1                                                   |          |
| 2558669408 | DRAFT_00076 | Coordinates    | 55755..56378(-)                                                                                     |          |
| 2558669408 | DRAFT_00076 | DNA_length     | 624bp                                                                                               |          |
| 2558669408 | DRAFT_00076 | Protein_length | 207aa                                                                                               |          |
| 2558669408 | DRAFT_00076 | GC             |                                                                                                     | 0.58     |



|            |             |                |                                                                  |          |
|------------|-------------|----------------|------------------------------------------------------------------|----------|
| 2558669409 | DRAFT_00077 | COG_category   | [O] Posttranslational modification, protein turnover, chaperones |          |
| 2558669409 | DRAFT_00077 | COG0533        | Metal-dependent proteases with possible chaperone activity       | 2.00E-86 |
| 2558669409 | DRAFT_00077 | pfam00814      | Peptidase_M22                                                    | 1.70E-70 |
| 2558669409 | DRAFT_00077 | TIGR03722      | universal archaeal protein Kae1                                  | 0.00E+00 |
| 2558669409 | DRAFT_00077 | TIGR00329      | metallohydrolase, glycoprotease/Kae1 family                      | 2.70E-82 |
| 2558669409 | DRAFT_00077 | KO:K15900      | tRNA threonylcarbamoyladenosine biosynthesis protein             | 0.00E+00 |
| 2558669409 | DRAFT_00077 | Locus_type     | CDS                                                              |          |
| 2558669409 | DRAFT_00077 | Product_name   | metallohydrolase, glycoprotease/Kae1 family                      |          |
| 2558669409 | DRAFT_00077 | Scaffold       | DRAFT_contig_70_5_len_108223_read_count_1902626.1                |          |
| 2558669409 | DRAFT_00077 | Coordinates    | 56398..57390(-)                                                  |          |
| 2558669409 | DRAFT_00077 | DNA_length     | 993bp                                                            |          |
| 2558669409 | DRAFT_00077 | Protein_length | 330aa                                                            |          |
| 2558669409 | DRAFT_00077 | GC             |                                                                  | 0.61     |
| 2558669410 | DRAFT_00078 | Locus_type     | CDS                                                              |          |
| 2558669410 | DRAFT_00078 | Product_name   | hypothetical protein                                             |          |
| 2558669410 | DRAFT_00078 | Scaffold       | DRAFT_contig_70_5_len_108223_read_count_1902626.1                |          |
| 2558669410 | DRAFT_00078 | Coordinates    | 57397..57918(-)                                                  |          |
| 2558669410 | DRAFT_00078 | DNA_length     | 522bp                                                            |          |
| 2558669410 | DRAFT_00078 | Protein_length | 173aa                                                            |          |
| 2558669410 | DRAFT_00078 | GC             |                                                                  | 0.54     |
| 2558669411 | DRAFT_00079 | COG_category   | [J] Translation, ribosomal structure and biogenesis              |          |
| 2558669411 | DRAFT_00079 | COG1325        | Predicted exosome subunit                                        | 4.00E-16 |
| 2558669411 | DRAFT_00079 | pfam01877      | RNA_binding                                                      | 1.40E-20 |
| 2558669411 | DRAFT_00079 | KO:K07581      | hypothetical protein                                             | 1.70E-08 |
| 2558669411 | DRAFT_00079 | Locus_type     | CDS                                                              |          |
| 2558669411 | DRAFT_00079 | Product_name   | Predicted exosome subunit                                        |          |
| 2558669411 | DRAFT_00079 | Scaffold       | DRAFT_contig_70_5_len_108223_read_count_1902626.1                |          |
| 2558669411 | DRAFT_00079 | Coordinates    | 57971..58405(+)                                                  |          |
| 2558669411 | DRAFT_00079 | DNA_length     | 435bp                                                            |          |
| 2558669411 | DRAFT_00079 | Protein_length | 144aa                                                            |          |
| 2558669411 | DRAFT_00079 | GC             |                                                                  | 0.58     |

|            |             |                |                                                       |          |
|------------|-------------|----------------|-------------------------------------------------------|----------|
| 2558669412 | DRAFT_00080 | Locus_type     | CDS                                                   |          |
| 2558669412 | DRAFT_00080 | Product_name   | hypothetical protein                                  |          |
| 2558669412 | DRAFT_00080 | Scaffold       | DRAFT_contig_70_5_len_108223_read_count_1902626.1     |          |
| 2558669412 | DRAFT_00080 | Coordinates    | 58406..58705(+)                                       |          |
| 2558669412 | DRAFT_00080 | DNA_length     | 300bp                                                 |          |
| 2558669412 | DRAFT_00080 | Protein_length | 99aa                                                  |          |
| 2558669412 | DRAFT_00080 | GC             |                                                       | 0.56     |
|            |             |                |                                                       |          |
| 2558669413 | DRAFT_00081 | COG_category   | [I] Lipid transport and metabolism                    |          |
| 2558669413 | DRAFT_00081 | COG3255        | Putative sterol carrier protein                       | 9.00E-04 |
| 2558669413 | DRAFT_00081 | pfam02036      | SCP2                                                  | 1.00E-11 |
| 2558669413 | DRAFT_00081 | Locus_type     | CDS                                                   |          |
| 2558669413 | DRAFT_00081 | Product_name   | Putative sterol carrier protein                       |          |
| 2558669413 | DRAFT_00081 | Scaffold       | DRAFT_contig_70_5_len_108223_read_count_1902626.1     |          |
| 2558669413 | DRAFT_00081 | Coordinates    | 58689..59066(+)                                       |          |
| 2558669413 | DRAFT_00081 | DNA_length     | 378bp                                                 |          |
| 2558669413 | DRAFT_00081 | Protein_length | 125aa                                                 |          |
| 2558669413 | DRAFT_00081 | GC             |                                                       | 0.54     |
|            |             |                |                                                       |          |
| 2558669414 | DRAFT_00082 | COG_category   | [C] Energy production and conversion                  |          |
| 2558669414 | DRAFT_00082 | COG1804        | Predicted acyl-CoA transferases/carnitine dehydratase | 5.00E-82 |
| 2558669414 | DRAFT_00082 | pfam02515      | CoA_transf_3                                          | 4.00E-49 |
| 2558669414 | DRAFT_00082 | Locus_type     | CDS                                                   |          |
| 2558669414 | DRAFT_00082 | Product_name   | Predicted acyl-CoA transferases/carnitine dehydratase |          |
| 2558669414 | DRAFT_00082 | Scaffold       | DRAFT_contig_70_5_len_108223_read_count_1902626.1     |          |
| 2558669414 | DRAFT_00082 | Coordinates    | 59321..60466(-)                                       |          |
| 2558669414 | DRAFT_00082 | DNA_length     | 1146bp                                                |          |
| 2558669414 | DRAFT_00082 | Protein_length | 381aa                                                 |          |
| 2558669414 | DRAFT_00082 | GC             |                                                       | 0.6      |
|            |             |                |                                                       |          |
| 2558669415 | DRAFT_00083 | Locus_type     | CDS                                                   |          |
| 2558669415 | DRAFT_00083 | Product_name   | hypothetical protein                                  |          |
| 2558669415 | DRAFT_00083 | Scaffold       | DRAFT_contig_70_5_len_108223_read_count_1902626.1     |          |

|            |             |                |        |                                                   |          |
|------------|-------------|----------------|--------|---------------------------------------------------|----------|
| 2558669415 | DRAFT_00083 | Coordinates    |        | 60579..61244(+)                                   |          |
| 2558669415 | DRAFT_00083 | DNA_length     |        | 666bp                                             |          |
| 2558669415 | DRAFT_00083 | Protein_length |        | 221aa                                             |          |
| 2558669415 | DRAFT_00083 | GC             |        |                                                   | 0.49     |
| 2558669415 | DRAFT_00083 | Transmembrane  |        | Yes                                               |          |
|            |             |                |        |                                                   |          |
| 2558669416 | DRAFT_00084 | Locus_type     |        | CDS                                               |          |
| 2558669416 | DRAFT_00084 | Product_name   |        | hypothetical protein                              |          |
| 2558669416 | DRAFT_00084 | Scaffold       |        | DRAFT_contig_70_5_len_108223_read_count_1902626.1 |          |
| 2558669416 | DRAFT_00084 | Coordinates    |        | 61541..61726(+)                                   |          |
| 2558669416 | DRAFT_00084 | DNA_length     |        | 186bp                                             |          |
| 2558669416 | DRAFT_00084 | Protein_length |        | 61aa                                              |          |
| 2558669416 | DRAFT_00084 | GC             |        |                                                   | 0.58     |
|            |             |                |        |                                                   |          |
| 2558669417 | DRAFT_00085 | Locus_type     |        | CDS                                               |          |
| 2558669417 | DRAFT_00085 | Product_name   |        | hypothetical protein                              |          |
| 2558669417 | DRAFT_00085 | Scaffold       |        | DRAFT_contig_70_5_len_108223_read_count_1902626.1 |          |
| 2558669417 | DRAFT_00085 | Coordinates    |        | 61772..61918(+)                                   |          |
| 2558669417 | DRAFT_00085 | DNA_length     |        | 147bp                                             |          |
| 2558669417 | DRAFT_00085 | Protein_length |        | 48aa                                              |          |
| 2558669417 | DRAFT_00085 | GC             |        |                                                   | 0.49     |
|            |             |                |        |                                                   |          |
| 2558669418 | DRAFT_00086 | Locus_type     |        | CDS                                               |          |
| 2558669418 | DRAFT_00086 | Product_name   |        | hypothetical protein                              |          |
| 2558669418 | DRAFT_00086 | Scaffold       |        | DRAFT_contig_70_5_len_108223_read_count_1902626.1 |          |
| 2558669418 | DRAFT_00086 | Coordinates    |        | 62088..63284(+)                                   |          |
| 2558669418 | DRAFT_00086 | DNA_length     |        | 1197bp                                            |          |
| 2558669418 | DRAFT_00086 | Protein_length |        | 398aa                                             |          |
| 2558669418 | DRAFT_00086 | GC             |        |                                                   | 0.56     |
|            |             |                |        |                                                   |          |
| 2558669419 | DRAFT_00087 | pfam13414      | TPR_11 |                                                   | 6.90E-09 |
| 2558669419 | DRAFT_00087 | pfam13414      | TPR_11 |                                                   | 2.00E-06 |
| 2558669419 | DRAFT_00087 | pfam13414      | TPR_11 |                                                   | 2.60E-14 |
| 2558669419 | DRAFT_00087 | pfam13289      | SIR2_2 |                                                   | 3.40E-13 |

|            |             |                |                                                                  |          |
|------------|-------------|----------------|------------------------------------------------------------------|----------|
| 2558669419 | DRAFT_00087 | Locus_type     | CDS                                                              |          |
| 2558669419 | DRAFT_00087 | Product_name   | SIR2-like domain/TPR repeat                                      |          |
| 2558669419 | DRAFT_00087 | Scaffold       | DRAFT_contig_70_5_len_108223_read_count_1902626.1                |          |
| 2558669419 | DRAFT_00087 | Coordinates    | 63400..65409(-)                                                  |          |
| 2558669419 | DRAFT_00087 | DNA_length     | 2010bp                                                           |          |
| 2558669419 | DRAFT_00087 | Protein_length | 669aa                                                            |          |
| 2558669419 | DRAFT_00087 | GC             |                                                                  | 0.47     |
| 2558669420 | DRAFT_00088 | Locus_type     | CDS                                                              |          |
| 2558669420 | DRAFT_00088 | Product_name   | hypothetical protein                                             |          |
| 2558669420 | DRAFT_00088 | Scaffold       | DRAFT_contig_70_5_len_108223_read_count_1902626.1                |          |
| 2558669420 | DRAFT_00088 | Coordinates    | 65842..66954(-)                                                  |          |
| 2558669420 | DRAFT_00088 | DNA_length     | 1113bp                                                           |          |
| 2558669420 | DRAFT_00088 | Protein_length | 370aa                                                            |          |
| 2558669420 | DRAFT_00088 | GC             |                                                                  | 0.53     |
| 2558669421 | DRAFT_00089 | COG_category   | [R] General function prediction only                             |          |
| 2558669421 | DRAFT_00089 | COG2220        | Predicted Zn-dependent hydrolases of the beta-lactamase fold     | 5.00E-25 |
| 2558669421 | DRAFT_00089 | pfam13483      | Lactamase_B_3                                                    | 8.00E-32 |
| 2558669421 | DRAFT_00089 | Locus_type     | CDS                                                              |          |
| 2558669421 | DRAFT_00089 | Product_name   | Predicted Zn-dependent hydrolases of the beta-lactamase fold     |          |
| 2558669421 | DRAFT_00089 | Scaffold       | DRAFT_contig_70_5_len_108223_read_count_1902626.1                |          |
| 2558669421 | DRAFT_00089 | Coordinates    | 66909..67577(-)                                                  |          |
| 2558669421 | DRAFT_00089 | DNA_length     | 669bp                                                            |          |
| 2558669421 | DRAFT_00089 | Protein_length | 222aa                                                            |          |
| 2558669421 | DRAFT_00089 | GC             |                                                                  | 0.55     |
| 2558669422 | DRAFT_00090 | KEGG_module    | M00342: Bacterial proteasome                                     |          |
| 2558669422 | DRAFT_00090 | KEGG_module    | M00343: Archaeal proteasome                                      |          |
| 2558669422 | DRAFT_00090 | COG_category   | [O] Posttranslational modification, protein turnover, chaperones |          |
| 2558669422 | DRAFT_00090 | COG0638        | 20S proteasome, alpha and beta subunits                          | 7.00E-37 |
| 2558669422 | DRAFT_00090 | pfam00227      | Proteasome                                                       | 8.60E-42 |
| 2558669422 | DRAFT_00090 | EC:3.4.25.1    | Proteasome endopeptidase complex.                                |          |
| 2558669422 | DRAFT_00090 | TIGR03634      | proteasome endopeptidase complex, archaeal, beta subunit         | 2.20E-62 |

|            |             |                |                                                          |          |
|------------|-------------|----------------|----------------------------------------------------------|----------|
| 2558669422 | DRAFT_00090 | KO:K03433      | proteasome beta subunit [EC:3.4.25.1]                    | 0.00E+00 |
| 2558669422 | DRAFT_00090 | Locus_type     | CDS                                                      |          |
| 2558669422 | DRAFT_00090 | Product_name   | 20S proteasome, alpha and beta subunits                  |          |
| 2558669422 | DRAFT_00090 | Scaffold       | DRAFT_contig_70_5_len_108223_read_count_1902626.1        |          |
| 2558669422 | DRAFT_00090 | Coordinates    | 67590..68189(-)                                          |          |
| 2558669422 | DRAFT_00090 | DNA_length     | 600bp                                                    |          |
| 2558669422 | DRAFT_00090 | Protein_length | 199aa                                                    |          |
| 2558669422 | DRAFT_00090 | GC             |                                                          | 0.58     |
| 2558669423 | DRAFT_00091 | COG_category   | [A] RNA processing and modification                      |          |
| 2558669423 | DRAFT_00091 | COG0430        | RNA 3'-terminal phosphate cyclase                        | 7.00E-73 |
| 2558669423 | DRAFT_00091 | pfam05189      | RTC_insert                                               | 2.90E-10 |
| 2558669423 | DRAFT_00091 | pfam01137      | RTC                                                      | 3.40E-66 |
| 2558669423 | DRAFT_00091 | EC:6.5.1.4     | RNA-3'-phosphate cyclase.                                |          |
| 2558669423 | DRAFT_00091 | TIGR03399      | RNA 3'-phosphate cyclase                                 | 8.10E-97 |
| 2558669423 | DRAFT_00091 | KO:K01974      | RNA 3'-terminal phosphate cyclase [EC:6.5.1.4]           | 0.00E+00 |
| 2558669423 | DRAFT_00091 | Locus_type     | CDS                                                      |          |
| 2558669423 | DRAFT_00091 | Product_name   | RNA 3'-phosphate cyclase                                 |          |
| 2558669423 | DRAFT_00091 | Scaffold       | DRAFT_contig_70_5_len_108223_read_count_1902626.1        |          |
| 2558669423 | DRAFT_00091 | Coordinates    | 68254..69288(-)                                          |          |
| 2558669423 | DRAFT_00091 | DNA_length     | 1035bp                                                   |          |
| 2558669423 | DRAFT_00091 | Protein_length | 344aa                                                    |          |
| 2558669423 | DRAFT_00091 | GC             |                                                          | 0.64     |
| 2558669424 | DRAFT_00092 | Metacyc        | NAD-BIOSYNTHESIS-III: NAD biosynthesis III               |          |
| 2558669424 | DRAFT_00092 | Metacyc        | PWY30-4106: NAD salvage pathway III                      |          |
| 2558669424 | DRAFT_00092 | COG_category   | [H] Coenzyme transport and metabolism                    |          |
| 2558669424 | DRAFT_00092 | COG1056        | Nicotinamide mononucleotide adenylyltransferase          | 3.00E-37 |
| 2558669424 | DRAFT_00092 | pfam01467      | CTP_transf_2                                             | 4.20E-16 |
| 2558669424 | DRAFT_00092 | EC:2.7.7.1     | Nicotinamide-nucleotide adenylyltransferase.             |          |
| 2558669424 | DRAFT_00092 | TIGR00125      | cytidyltransferase-like domain                           | 3.30E-17 |
| 2558669424 | DRAFT_00092 | TIGR01527      | nicotinamide-nucleotide adenylyltransferase              | 1.60E-56 |
| 2558669424 | DRAFT_00092 | KO:K00952      | nicotinamide-nucleotide adenylyltransferase [EC:2.7.7.1] | 1.20E-43 |
| 2558669424 | DRAFT_00092 | Locus_type     | CDS                                                      |          |

|            |             |                |                                                                      |           |
|------------|-------------|----------------|----------------------------------------------------------------------|-----------|
| 2558669424 | DRAFT_00092 | Product_name   | cytidyltransferase-like domain                                       |           |
| 2558669424 | DRAFT_00092 | Scaffold       | DRAFT_contig_70_5_len_108223_read_count_1902626.1                    |           |
| 2558669424 | DRAFT_00092 | Coordinates    | 69373..69897(+)                                                      |           |
| 2558669424 | DRAFT_00092 | DNA_length     | 525bp                                                                |           |
| 2558669424 | DRAFT_00092 | Protein_length | 174aa                                                                |           |
| 2558669424 | DRAFT_00092 | GC             |                                                                      | 0.55      |
|            |             |                |                                                                      |           |
| 2558669425 | DRAFT_00093 | COG_category   | [E] Amino acid transport and metabolism                              |           |
| 2558669425 | DRAFT_00093 | COG0075        | Serine-pyruvate aminotransferase/archaeal aspartate aminotransferase | 1.00E-102 |
| 2558669425 | DRAFT_00093 | pfam00266      | Aminotran_5                                                          | 4.50E-35  |
| 2558669425 | DRAFT_00093 | Locus_type     | CDS                                                                  |           |
| 2558669425 | DRAFT_00093 | Product_name   | Serine-pyruvate aminotransferase/archaeal aspartate aminotransferase |           |
| 2558669425 | DRAFT_00093 | Scaffold       | DRAFT_contig_70_5_len_108223_read_count_1902626.1                    |           |
| 2558669425 | DRAFT_00093 | Coordinates    | 69902..71002(+)                                                      |           |
| 2558669425 | DRAFT_00093 | DNA_length     | 1101bp                                                               |           |
| 2558669425 | DRAFT_00093 | Protein_length | 366aa                                                                |           |
| 2558669425 | DRAFT_00093 | GC             |                                                                      | 0.59      |
|            |             |                |                                                                      |           |
| 2558669426 | DRAFT_00094 | COG_category   | [O] Posttranslational modification, protein turnover, chaperones     |           |
| 2558669426 | DRAFT_00094 | COG1047        | FKBP-type peptidyl-prolyl cis-trans isomerases 2                     | 1.00E-28  |
| 2558669426 | DRAFT_00094 | pfam00254      | FKBP_C                                                               | 1.80E-08  |
| 2558669426 | DRAFT_00094 | EC:5.2.1.8     | Peptidylprolyl isomerase.                                            |           |
| 2558669426 | DRAFT_00094 | KO:K01802      | peptidylprolyl isomerase [EC:5.2.1.8]                                | 0.00E+00  |
| 2558669426 | DRAFT_00094 | Locus_type     | CDS                                                                  |           |
| 2558669426 | DRAFT_00094 | Product_name   | FKBP-type peptidyl-prolyl cis-trans isomerases 2                     |           |
| 2558669426 | DRAFT_00094 | Scaffold       | DRAFT_contig_70_5_len_108223_read_count_1902626.1                    |           |
| 2558669426 | DRAFT_00094 | Coordinates    | 71040..71852(+)                                                      |           |
| 2558669426 | DRAFT_00094 | DNA_length     | 813bp                                                                |           |
| 2558669426 | DRAFT_00094 | Protein_length | 270aa                                                                |           |
| 2558669426 | DRAFT_00094 | GC             |                                                                      | 0.57      |
|            |             |                |                                                                      |           |
| 2558669427 | DRAFT_00095 | Metacyc        | PWY-6349: CDP-archaeol biosynthesis                                  |           |
| 2558669427 | DRAFT_00095 | COG_category   | [C] Energy production and conversion                                 |           |
| 2558669427 | DRAFT_00095 | COG0371        | Glycerol dehydrogenase and related enzymes                           | 8.00E-83  |

|            |             |                |                                                                      |          |
|------------|-------------|----------------|----------------------------------------------------------------------|----------|
| 2558669427 | DRAFT_00095 | pfam13685      | Fe-ADH_2                                                             | 1.50E-61 |
| 2558669427 | DRAFT_00095 | EC:1.1.1.261   | sn-glycerol-1-phosphate dehydrogenase.                               |          |
| 2558669427 | DRAFT_00095 | KO:K00096      | glycerol-1-phosphate dehydrogenase [NAD(P)] [EC:1.1.1.261]           | 0.00E+00 |
| 2558669427 | DRAFT_00095 | Locus_type     | CDS                                                                  |          |
| 2558669427 | DRAFT_00095 | Product_name   | Glycerol dehydrogenase and related enzymes                           |          |
| 2558669427 | DRAFT_00095 | Scaffold       | DRAFT_contig_70_5_len_108223_read_count_1902626.1                    |          |
| 2558669427 | DRAFT_00095 | Coordinates    | 71849..72868(-)                                                      |          |
| 2558669427 | DRAFT_00095 | DNA_length     | 1020bp                                                               |          |
| 2558669427 | DRAFT_00095 | Protein_length | 339aa                                                                |          |
| 2558669427 | DRAFT_00095 | GC             |                                                                      | 0.59     |
| 2558669428 | DRAFT_00096 | KEGG_module    | M00342: Bacterial proteasome                                         |          |
| 2558669428 | DRAFT_00096 | KEGG_module    | M00343: Archaeal proteasome                                          |          |
| 2558669428 | DRAFT_00096 | COG_category   | [O] Posttranslational modification, protein turnover, chaperones     |          |
| 2558669428 | DRAFT_00096 | COG0638        | 20S proteasome, alpha and beta subunits                              | 1.00E-44 |
| 2558669428 | DRAFT_00096 | pfam00227      | Proteasome                                                           | 1.20E-48 |
| 2558669428 | DRAFT_00096 | EC:3.4.25.1    | Proteasome endopeptidase complex.                                    |          |
| 2558669428 | DRAFT_00096 | TIGR03634      | proteasome endopeptidase complex, archaeal, beta subunit             | 3.80E-68 |
| 2558669428 | DRAFT_00096 | KO:K03433      | proteasome beta subunit [EC:3.4.25.1]                                | 0.00E+00 |
| 2558669428 | DRAFT_00096 | Locus_type     | CDS                                                                  |          |
| 2558669428 | DRAFT_00096 | Product_name   | 20S proteasome, alpha and beta subunits                              |          |
| 2558669428 | DRAFT_00096 | Scaffold       | DRAFT_contig_70_5_len_108223_read_count_1902626.1                    |          |
| 2558669428 | DRAFT_00096 | Coordinates    | 73147..73821(+)                                                      |          |
| 2558669428 | DRAFT_00096 | DNA_length     | 675bp                                                                |          |
| 2558669428 | DRAFT_00096 | Protein_length | 224aa                                                                |          |
| 2558669428 | DRAFT_00096 | GC             |                                                                      | 0.55     |
| 2558669429 | DRAFT_00097 | COG_category   | [R] General function prediction only                                 |          |
| 2558669429 | DRAFT_00097 | COG1782        | Predicted metal-dependent RNase, consists of a metallo-beta-lactamas | 0.00E+00 |
| 2558669429 | DRAFT_00097 | pfam00753      | Lactamase_B                                                          | 2.40E-24 |
| 2558669429 | DRAFT_00097 | pfam10996      | Beta-Casp                                                            | 1.50E-29 |
| 2558669429 | DRAFT_00097 | pfam07521      | RMMBL                                                                | 1.30E-11 |
| 2558669429 | DRAFT_00097 | TIGR03675      | arCOG00543 universal archaeal KH-domain/beta-lactamase-domain pri    | 0.00E+00 |
| 2558669429 | DRAFT_00097 | Locus_type     | CDS                                                                  |          |

|            |             |                |                                                                        |           |
|------------|-------------|----------------|------------------------------------------------------------------------|-----------|
| 2558669429 | DRAFT_00097 | Product_name   | arCOG00543 universal archaeal KH-domain/beta-lactamase-domain p        |           |
| 2558669429 | DRAFT_00097 | Scaffold       | DRAFT_contig_70_5_len_108223_read_count_1902626.1                      |           |
| 2558669429 | DRAFT_00097 | Coordinates    | 73824..75737(+)                                                        |           |
| 2558669429 | DRAFT_00097 | DNA_length     | 1914bp                                                                 |           |
| 2558669429 | DRAFT_00097 | Protein_length | 637aa                                                                  |           |
| 2558669429 | DRAFT_00097 | GC             |                                                                        | 0.56      |
|            |             |                |                                                                        |           |
| 2558669430 | DRAFT_00098 | Metacyc        | PWY-5469: sesamin biosynthesis                                         |           |
| 2558669430 | DRAFT_00098 | Metacyc        | PWY-4302: aerobic respiration (alternative oxidase pathway)            |           |
| 2558669430 | DRAFT_00098 | Metacyc        | PWY-7079: geodin biosynthesis                                          |           |
| 2558669430 | DRAFT_00098 | Metacyc        | PWY-6766: salicin biosynthesis                                         |           |
| 2558669430 | DRAFT_00098 | Metacyc        | PWY-5748: &gamma;-coniciene and coniine biosynthesis                   |           |
| 2558669430 | DRAFT_00098 | Metacyc        | PWY-5987: sorgoleone biosynthesis                                      |           |
| 2558669430 | DRAFT_00098 | Metacyc        | PWY-5479: podophyllotoxin and 6-methoxypodophyllotoxin biosynthesis    |           |
| 2558669430 | DRAFT_00098 | Metacyc        | PWY-2821: glucosinolate biosynthesis from phenylalanine                |           |
| 2558669430 | DRAFT_00098 | Metacyc        | PWY66-388: fatty acid &alpha;-oxidation III                            |           |
| 2558669430 | DRAFT_00098 | Metacyc        | PWY-7139: sesaminol glucoside biosynthesis                             |           |
| 2558669430 | DRAFT_00098 | Metacyc        | PWY-5826: hypoglycin biosynthesis                                      |           |
| 2558669430 | DRAFT_00098 | Metacyc        | PWY-5780: hypericin biosynthesis                                       |           |
| 2558669430 | DRAFT_00098 | Metacyc        | PWY-7186: superpathway of scopolin and esculin biosynthesis            |           |
| 2558669430 | DRAFT_00098 | Metacyc        | PWY-6326: camptothecin biosynthesis                                    |           |
| 2558669430 | DRAFT_00098 | Metacyc        | PWYG-321: mycolate biosynthesis                                        |           |
| 2558669430 | DRAFT_00098 | COG_category   | [R] General function prediction only                                   |           |
| 2558669430 | DRAFT_00098 | COG1064        | Zn-dependent alcohol dehydrogenases                                    | 1.00E-106 |
| 2558669430 | DRAFT_00098 | pfam08240      | ADH_N                                                                  | 4.30E-27  |
| 2558669430 | DRAFT_00098 | pfam00107      | ADH_zinc_N                                                             | 4.30E-26  |
| 2558669430 | DRAFT_00098 | EC:1.-         | Oxidoreductases.                                                       |           |
| 2558669430 | DRAFT_00098 | KO:K13979      | uncharacterized zinc-type alcohol dehydrogenase-like protein [EC:1.-.- | 0.00E+00  |
| 2558669430 | DRAFT_00098 | Locus_type     | CDS                                                                    |           |
| 2558669430 | DRAFT_00098 | Product_name   | Zn-dependent alcohol dehydrogenases                                    |           |
| 2558669430 | DRAFT_00098 | Scaffold       | DRAFT_contig_70_5_len_108223_read_count_1902626.1                      |           |
| 2558669430 | DRAFT_00098 | Coordinates    | 76432..77481(+)                                                        |           |
| 2558669430 | DRAFT_00098 | DNA_length     | 1050bp                                                                 |           |
| 2558669430 | DRAFT_00098 | Protein_length | 349aa                                                                  |           |



|            |             |                |                                                   |          |
|------------|-------------|----------------|---------------------------------------------------|----------|
| 2558669430 | DRAFT_00098 | GC             |                                                   | 0.62     |
| 2558669431 | DRAFT_00099 | Locus_type     | CDS                                               |          |
| 2558669431 | DRAFT_00099 | Product_name   | hypothetical protein                              |          |
| 2558669431 | DRAFT_00099 | Scaffold       | DRAFT_contig_70_5_len_108223_read_count_1902626.1 |          |
| 2558669431 | DRAFT_00099 | Coordinates    | 77789..79159(+)                                   |          |
| 2558669431 | DRAFT_00099 | DNA_length     | 1371bp                                            |          |
| 2558669431 | DRAFT_00099 | Protein_length | 456aa                                             |          |
| 2558669431 | DRAFT_00099 | GC             |                                                   | 0.54     |
| 2558669431 | DRAFT_00099 | Transmembrane  | Yes                                               |          |
| 2558669432 | DRAFT_00100 | Locus_type     | CDS                                               |          |
| 2558669432 | DRAFT_00100 | Product_name   | hypothetical protein                              |          |
| 2558669432 | DRAFT_00100 | Scaffold       | DRAFT_contig_70_5_len_108223_read_count_1902626.1 |          |
| 2558669432 | DRAFT_00100 | Coordinates    | 79113..79463(+)                                   |          |
| 2558669432 | DRAFT_00100 | DNA_length     | 351bp                                             |          |
| 2558669432 | DRAFT_00100 | Protein_length | 116aa                                             |          |
| 2558669432 | DRAFT_00100 | GC             |                                                   | 0.52     |
| 2558669433 | DRAFT_00101 | Locus_type     | CDS                                               |          |
| 2558669433 | DRAFT_00101 | Product_name   | hypothetical protein                              |          |
| 2558669433 | DRAFT_00101 | Scaffold       | DRAFT_contig_70_5_len_108223_read_count_1902626.1 |          |
| 2558669433 | DRAFT_00101 | Coordinates    | 79545..79814(-)                                   |          |
| 2558669433 | DRAFT_00101 | DNA_length     | 270bp                                             |          |
| 2558669433 | DRAFT_00101 | Protein_length | 89aa                                              |          |
| 2558669433 | DRAFT_00101 | GC             |                                                   | 0.52     |
| 2558669433 | DRAFT_00101 | Transmembrane  | Yes                                               |          |
| 2558669434 | DRAFT_00102 | pfam00339      | Arrestin_N                                        | 1.10E-05 |
| 2558669434 | DRAFT_00102 | Locus_type     | CDS                                               |          |
| 2558669434 | DRAFT_00102 | Product_name   | Arrestin (or S-antigen), N-terminal domain        |          |
| 2558669434 | DRAFT_00102 | Scaffold       | DRAFT_contig_70_5_len_108223_read_count_1902626.1 |          |
| 2558669434 | DRAFT_00102 | Coordinates    | 80038..80634(-)                                   |          |
| 2558669434 | DRAFT_00102 | DNA_length     | 597bp                                             |          |

|            |             |                |                                                   |          |
|------------|-------------|----------------|---------------------------------------------------|----------|
| 2558669434 | DRAFT_00102 | Protein_length | 198aa                                             |          |
| 2558669434 | DRAFT_00102 | GC             |                                                   | 0.55     |
| 2558669435 | DRAFT_00103 | pfam05048      | NosD                                              | 1.20E-15 |
| 2558669435 | DRAFT_00103 | pfam05048      | NosD                                              | 5.60E-22 |
| 2558669435 | DRAFT_00103 | pfam05048      | NosD                                              | 4.70E-22 |
| 2558669435 | DRAFT_00103 | TIGR03804      | parallel beta-helix repeat (two copies)           | 2.70E-12 |
| 2558669435 | DRAFT_00103 | Locus_type     | CDS                                               |          |
| 2558669435 | DRAFT_00103 | Product_name   | parallel beta-helix repeat (two copies)           |          |
| 2558669435 | DRAFT_00103 | Scaffold       | DRAFT_contig_70_5_len_108223_read_count_1902626.1 |          |
| 2558669435 | DRAFT_00103 | Coordinates    | 80955..82871(+)                                   |          |
| 2558669435 | DRAFT_00103 | DNA_length     | 1917bp                                            |          |
| 2558669435 | DRAFT_00103 | Protein_length | 638aa                                             |          |
| 2558669435 | DRAFT_00103 | GC             |                                                   | 0.53     |
| 2558669435 | DRAFT_00103 | Transmembrane  | Yes                                               |          |
| 2558669436 | DRAFT_00104 | COG_category   | [S] Function unknown                              |          |
| 2558669436 | DRAFT_00104 | COG2450        | Uncharacterized conserved protein                 | 1.00E-07 |
| 2558669436 | DRAFT_00104 | pfam04472      | DUF552                                            | 6.20E-14 |
| 2558669436 | DRAFT_00104 | KO:K09152      | hypothetical protein                              | 1.70E-23 |
| 2558669436 | DRAFT_00104 | Locus_type     | CDS                                               |          |
| 2558669436 | DRAFT_00104 | Product_name   | Uncharacterized conserved protein                 |          |
| 2558669436 | DRAFT_00104 | Scaffold       | DRAFT_contig_70_5_len_108223_read_count_1902626.1 |          |
| 2558669436 | DRAFT_00104 | Coordinates    | 83043..83339(-)                                   |          |
| 2558669436 | DRAFT_00104 | DNA_length     | 297bp                                             |          |
| 2558669436 | DRAFT_00104 | Protein_length | 98aa                                              |          |
| 2558669436 | DRAFT_00104 | GC             |                                                   | 0.58     |
| 2558669437 | DRAFT_00105 | Locus_type     | CDS                                               |          |
| 2558669437 | DRAFT_00105 | Product_name   | hypothetical protein                              |          |
| 2558669437 | DRAFT_00105 | Scaffold       | DRAFT_contig_70_5_len_108223_read_count_1902626.1 |          |
| 2558669437 | DRAFT_00105 | Coordinates    | 83282..83410(-)                                   |          |
| 2558669437 | DRAFT_00105 | DNA_length     | 129bp                                             |          |
| 2558669437 | DRAFT_00105 | Protein_length | 42aa                                              |          |

|            |             |                |                                                     |          |
|------------|-------------|----------------|-----------------------------------------------------|----------|
| 2558669437 | DRAFT_00105 | GC             |                                                     | 0.44     |
| 2558669438 | DRAFT_00106 | COG_category   | [J] Translation, ribosomal structure and biogenesis |          |
| 2558669438 | DRAFT_00106 | COG2016        | Predicted RNA-binding protein (contains PUA domain) | 2.00E-26 |
| 2558669438 | DRAFT_00106 | pfam01472      | PUA                                                 | 4.80E-16 |
| 2558669438 | DRAFT_00106 | TIGR00451      | uncharacterized domain 2                            | 1.00E-26 |
| 2558669438 | DRAFT_00106 | KO:K07575      | PUA domain protein                                  | 6.30E-28 |
| 2558669438 | DRAFT_00106 | Locus_type     | CDS                                                 |          |
| 2558669438 | DRAFT_00106 | Product_name   | Predicted RNA-binding protein (contains PUA domain) |          |
| 2558669438 | DRAFT_00106 | Scaffold       | DRAFT_contig_70_5_len_108223_read_count_1902626.1   |          |
| 2558669438 | DRAFT_00106 | Coordinates    | 83542..84021(-)                                     |          |
| 2558669438 | DRAFT_00106 | DNA_length     | 480bp                                               |          |
| 2558669438 | DRAFT_00106 | Protein_length | 159aa                                               |          |
| 2558669438 | DRAFT_00106 | GC             |                                                     | 0.59     |
| 2558669439 | DRAFT_00107 | COG_category   | [K] Transcription                                   |          |
| 2558669439 | DRAFT_00107 | COG1958        | Small nuclear ribonucleoprotein (snRNP) homolog     | 2.00E-11 |
| 2558669439 | DRAFT_00107 | pfam01423      | LSM                                                 | 6.40E-20 |
| 2558669439 | DRAFT_00107 | KO:K04796      | small nuclear ribonucleoprotein                     | 1.70E-25 |
| 2558669439 | DRAFT_00107 | Locus_type     | CDS                                                 |          |
| 2558669439 | DRAFT_00107 | Product_name   | Small nuclear ribonucleoprotein, LSM family         |          |
| 2558669439 | DRAFT_00107 | Scaffold       | DRAFT_contig_70_5_len_108223_read_count_1902626.1   |          |
| 2558669439 | DRAFT_00107 | Coordinates    | 84098..84316(+)                                     |          |
| 2558669439 | DRAFT_00107 | DNA_length     | 219bp                                               |          |
| 2558669439 | DRAFT_00107 | Protein_length | 72aa                                                |          |
| 2558669439 | DRAFT_00107 | GC             |                                                     | 0.56     |
| 2558669440 | DRAFT_00108 | Locus_type     | CDS                                                 |          |
| 2558669440 | DRAFT_00108 | Product_name   | hypothetical protein                                |          |
| 2558669440 | DRAFT_00108 | Scaffold       | DRAFT_contig_70_5_len_108223_read_count_1902626.1   |          |
| 2558669440 | DRAFT_00108 | Coordinates    | 84489..85151(+)                                     |          |
| 2558669440 | DRAFT_00108 | DNA_length     | 663bp                                               |          |
| 2558669440 | DRAFT_00108 | Protein_length | 220aa                                               |          |
| 2558669440 | DRAFT_00108 | GC             |                                                     | 0.58     |

|            |             |                |                                                                                  |          |
|------------|-------------|----------------|----------------------------------------------------------------------------------|----------|
| 2558669440 | DRAFT_00108 | Transmembrane  | Yes                                                                              |          |
| 2558669441 | DRAFT_00109 | KEGG_module    | M00007: Pentose phosphate pathway, non-oxidative phase, fructose 6P => ribose 5P |          |
| 2558669441 | DRAFT_00109 | KEGG_module    | M00167: Reductive pentose phosphate cycle, glyceraldehyde-3P => RuBP             |          |
| 2558669441 | DRAFT_00109 | KEGG_module    | M00165: Reductive pentose phosphate cycle (Calvin cycle)                         |          |
| 2558669441 | DRAFT_00109 | KEGG_module    | M00004: Pentose phosphate pathway (Pentose phosphate cycle)                      |          |
| 2558669441 | DRAFT_00109 | Metacyc        | P185-PWY: formaldehyde assimilation III (dihydroxyacetone cycle)                 |          |
| 2558669441 | DRAFT_00109 | Metacyc        | PWY-1861: formaldehyde assimilation II (RuMP Cycle)                              |          |
| 2558669441 | DRAFT_00109 | Metacyc        | CALVIN-PWY: Calvin-Benson-Bassham cycle                                          |          |
| 2558669441 | DRAFT_00109 | Metacyc        | PWY-5723: Rubisco shunt                                                          |          |
| 2558669441 | DRAFT_00109 | Metacyc        | P124-PWY: Bifidobacterium shunt                                                  |          |
| 2558669441 | DRAFT_00109 | Metacyc        | NONOXIPENT-PWY: pentose phosphate pathway (non-oxidative branch)                 |          |
| 2558669441 | DRAFT_00109 | IMG_pathway    | 341: Oxidative pentose phosphate pathway                                         |          |
| 2558669441 | DRAFT_00109 | IMG_pathway    | 342: Nonoxidative pentose phosphate pathway                                      |          |
| 2558669441 | DRAFT_00109 | IMG_pathway    | 343: Reverse ribulose monophosphate pathway                                      |          |
| 2558669441 | DRAFT_00109 | IMG_pathway    | 527: Calvin cycle                                                                |          |
| 2558669441 | DRAFT_00109 | IMG_pathway    | 535: D-allose conversion to D-fructose 6-phosphate                               |          |
| 2558669441 | DRAFT_00109 | COG_category   | [G] Carbohydrate transport and metabolism                                        |          |
| 2558669441 | DRAFT_00109 | COG0120        | Ribose 5-phosphate isomerase                                                     | 7.00E-49 |
| 2558669441 | DRAFT_00109 | pfam06026      | Rib_5-P_isom_A                                                                   | 1.20E-45 |
| 2558669441 | DRAFT_00109 | EC:5.3.1.6     | Ribose-5-phosphate isomerase.                                                    |          |
| 2558669441 | DRAFT_00109 | TIGR00021      | ribose 5-phosphate isomerase                                                     | 3.10E-60 |
| 2558669441 | DRAFT_00109 | KO:K01807      | ribose 5-phosphate isomerase A [EC:5.3.1.6]                                      | 3.10E-44 |
| 2558669441 | DRAFT_00109 | ITERM:01495    | ribose-5-phosphate isomerase (EC 5.3.1.6)                                        |          |
| 2558669441 | DRAFT_00109 | Locus_type     | CDS                                                                              |          |
| 2558669441 | DRAFT_00109 | Product_name   | ribose-5-phosphate isomerase (EC 5.3.1.6)                                        |          |
| 2558669441 | DRAFT_00109 | Scaffold       | DRAFT_contig_70_5_len_108223_read_count_1902626.1                                |          |
| 2558669441 | DRAFT_00109 | Coordinates    | 85151..85843(+)                                                                  |          |
| 2558669441 | DRAFT_00109 | DNA_length     | 693bp                                                                            |          |
| 2558669441 | DRAFT_00109 | Protein_length | 230aa                                                                            |          |
| 2558669441 | DRAFT_00109 | GC             |                                                                                  | 0.62     |
| 2558669442 | DRAFT_00110 | COG_category   | [C] Energy production and conversion                                             |          |
| 2558669442 | DRAFT_00110 | COG1146        | Ferredoxin                                                                       | 3.00E-05 |

|            |             |                |                                                   |          |
|------------|-------------|----------------|---------------------------------------------------|----------|
| 2558669442 | DRAFT_00110 | Locus_type     | CDS                                               |          |
| 2558669442 | DRAFT_00110 | Product_name   | Ferredoxin                                        |          |
| 2558669442 | DRAFT_00110 | Scaffold       | DRAFT_contig_70_5_len_108223_read_count_1902626.1 |          |
| 2558669442 | DRAFT_00110 | Coordinates    | 85880..86308(+)                                   |          |
| 2558669442 | DRAFT_00110 | DNA_length     | 429bp                                             |          |
| 2558669442 | DRAFT_00110 | Protein_length | 142aa                                             |          |
| 2558669442 | DRAFT_00110 | GC             |                                                   | 0.57     |
|            |             |                |                                                   |          |
| 2558669443 | DRAFT_00111 | Locus_type     | CDS                                               |          |
| 2558669443 | DRAFT_00111 | Product_name   | hypothetical protein                              |          |
| 2558669443 | DRAFT_00111 | Scaffold       | DRAFT_contig_70_5_len_108223_read_count_1902626.1 |          |
| 2558669443 | DRAFT_00111 | Coordinates    | 86532..86909(+)                                   |          |
| 2558669443 | DRAFT_00111 | DNA_length     | 378bp                                             |          |
| 2558669443 | DRAFT_00111 | Protein_length | 125aa                                             |          |
| 2558669443 | DRAFT_00111 | GC             |                                                   | 0.59     |
|            |             |                |                                                   |          |
| 2558669444 | DRAFT_00112 | COG_category   | [R] General function prediction only              |          |
| 2558669444 | DRAFT_00112 | COG2047        | Uncharacterized protein (ATP-grasp superfamily)   | 2.00E-59 |
| 2558669444 | DRAFT_00112 | pfam09754      | PAC2                                              | 1.80E-45 |
| 2558669444 | DRAFT_00112 | TIGR00162      | TIGR00162 family protein                          | 1.90E-67 |
| 2558669444 | DRAFT_00112 | Locus_type     | CDS                                               |          |
| 2558669444 | DRAFT_00112 | Product_name   | TIGR00162 family protein                          |          |
| 2558669444 | DRAFT_00112 | Scaffold       | DRAFT_contig_70_5_len_108223_read_count_1902626.1 |          |
| 2558669444 | DRAFT_00112 | Coordinates    | 86909..87694(+)                                   |          |
| 2558669444 | DRAFT_00112 | DNA_length     | 786bp                                             |          |
| 2558669444 | DRAFT_00112 | Protein_length | 261aa                                             |          |
| 2558669444 | DRAFT_00112 | GC             |                                                   | 0.6      |
|            |             |                |                                                   |          |
| 2558669445 | DRAFT_00113 | Locus_type     | CDS                                               |          |
| 2558669445 | DRAFT_00113 | Product_name   | hypothetical protein                              |          |
| 2558669445 | DRAFT_00113 | Scaffold       | DRAFT_contig_70_5_len_108223_read_count_1902626.1 |          |
| 2558669445 | DRAFT_00113 | Coordinates    | 88314..88535(+)                                   |          |
| 2558669445 | DRAFT_00113 | DNA_length     | 222bp                                             |          |
| 2558669445 | DRAFT_00113 | Protein_length | 73aa                                              |          |

|            |             |                |                                                   |          |
|------------|-------------|----------------|---------------------------------------------------|----------|
| 2558669445 | DRAFT_00113 | GC             |                                                   | 0.53     |
| 2558669445 | DRAFT_00113 | Transmembrane  | Yes                                               |          |
| 2558669446 | DRAFT_00114 | COG_category   | [S] Function unknown                              |          |
| 2558669446 | DRAFT_00114 | COG1690        | Uncharacterized conserved protein                 | 0.00E+00 |
| 2558669446 | DRAFT_00114 | pfam01139      | RtcB                                              | 0.00E+00 |
| 2558669446 | DRAFT_00114 | EC:6.5.1.3     | RNA ligase (ATP).                                 |          |
| 2558669446 | DRAFT_00114 | KO:K14415      | tRNA-splicing ligase RtcB [EC:6.5.1.3]            | 0.00E+00 |
| 2558669446 | DRAFT_00114 | Locus_type     | CDS                                               |          |
| 2558669446 | DRAFT_00114 | Product_name   | Uncharacterized conserved protein                 |          |
| 2558669446 | DRAFT_00114 | Scaffold       | DRAFT_contig_70_5_len_108223_read_count_1902626.1 |          |
| 2558669446 | DRAFT_00114 | Coordinates    | 88772..90229(-)                                   |          |
| 2558669446 | DRAFT_00114 | DNA_length     | 1458bp                                            |          |
| 2558669446 | DRAFT_00114 | Protein_length | 485aa                                             |          |
| 2558669446 | DRAFT_00114 | GC             |                                                   | 0.59     |
| 2558669447 | DRAFT_00115 | COG_category   | [S] Function unknown                              |          |
| 2558669447 | DRAFT_00115 | COG1371        | Uncharacterized conserved protein                 | 1.00E-21 |
| 2558669447 | DRAFT_00115 | pfam01951      | Archease                                          | 1.60E-30 |
| 2558669447 | DRAFT_00115 | Locus_type     | CDS                                               |          |
| 2558669447 | DRAFT_00115 | Product_name   | Uncharacterized conserved protein                 |          |
| 2558669447 | DRAFT_00115 | Scaffold       | DRAFT_contig_70_5_len_108223_read_count_1902626.1 |          |
| 2558669447 | DRAFT_00115 | Coordinates    | 90308..90730(-)                                   |          |
| 2558669447 | DRAFT_00115 | DNA_length     | 423bp                                             |          |
| 2558669447 | DRAFT_00115 | Protein_length | 140aa                                             |          |
| 2558669447 | DRAFT_00115 | GC             |                                                   | 0.59     |
| 2558669448 | DRAFT_00116 | Metacyc        | PWY-6984: lipoate salvage II                      |          |
| 2558669448 | DRAFT_00116 | Metacyc        | PWY0-522: lipoate salvage I                       |          |
| 2558669448 | DRAFT_00116 | COG_category   | [H] Coenzyme transport and metabolism             |          |
| 2558669448 | DRAFT_00116 | COG0095        | Lipoate-protein ligase A                          | 1.00E-34 |
| 2558669448 | DRAFT_00116 | pfam03099      | BPL_LpIA_LipB                                     | 1.40E-14 |
| 2558669448 | DRAFT_00116 | EC:2.7.7.63    | Lipoate--protein ligase.                          |          |
| 2558669448 | DRAFT_00116 | KO:K03800      | lipoate-protein ligase A [EC:2.7.7.63]            | 3.20E-26 |

|            |             |                |                                                          |           |
|------------|-------------|----------------|----------------------------------------------------------|-----------|
| 2558669448 | DRAFT_00116 | Locus_type     | CDS                                                      |           |
| 2558669448 | DRAFT_00116 | Product_name   | Lipoate-protein ligase A                                 |           |
| 2558669448 | DRAFT_00116 | Scaffold       | DRAFT_contig_70_5_len_108223_read_count_1902626.1        |           |
| 2558669448 | DRAFT_00116 | Coordinates    | 90794..91540(+)                                          |           |
| 2558669448 | DRAFT_00116 | DNA_length     | 747bp                                                    |           |
| 2558669448 | DRAFT_00116 | Protein_length | 248aa                                                    |           |
| 2558669448 | DRAFT_00116 | GC             |                                                          | 0.6       |
|            |             |                |                                                          |           |
| 2558669449 | DRAFT_00117 | Metacyc        | THREONINE-DEG2-PWY: threonine degradation II             |           |
| 2558669449 | DRAFT_00117 | COG_category   | [H] Coenzyme transport and metabolism                    |           |
| 2558669449 | DRAFT_00117 | COG0156        | 7-keto-8-aminopelargonate synthetase and related enzymes | 2.00E-114 |
| 2558669449 | DRAFT_00117 | pfam00155      | Aminotran_1_2                                            | 2.10E-61  |
| 2558669449 | DRAFT_00117 | EC:2.3.1.29    | Glycine C-acetyltransferase.                             |           |
| 2558669449 | DRAFT_00117 | TIGR00858      | 8-amino-7-oxononanoate synthase                          | 8.20E-121 |
| 2558669449 | DRAFT_00117 | TIGR01825      | pyridoxal phosphate-dependent acyltransferase, putative  | 0.00E+00  |
| 2558669449 | DRAFT_00117 | KO:K00639      | glycine C-acetyltransferase [EC:2.3.1.29]                | 0.00E+00  |
| 2558669449 | DRAFT_00117 | Locus_type     | CDS                                                      |           |
| 2558669449 | DRAFT_00117 | Product_name   | 7-keto-8-aminopelargonate synthetase and related enzymes |           |
| 2558669449 | DRAFT_00117 | Scaffold       | DRAFT_contig_70_5_len_108223_read_count_1902626.1        |           |
| 2558669449 | DRAFT_00117 | Coordinates    | 91526..92740(-)                                          |           |
| 2558669449 | DRAFT_00117 | DNA_length     | 1215bp                                                   |           |
| 2558669449 | DRAFT_00117 | Protein_length | 404aa                                                    |           |
| 2558669449 | DRAFT_00117 | GC             |                                                          | 0.59      |
|            |             |                |                                                          |           |
| 2558669450 | DRAFT_00118 | COG_category   | [M] Cell wall/membrane/envelope biogenesis               |           |
| 2558669450 | DRAFT_00118 | COG_category   | [G] Carbohydrate transport and metabolism                |           |
| 2558669450 | DRAFT_00118 | COG0451        | Nucleoside-diphosphate-sugar epimerases                  | 2.00E-36  |
| 2558669450 | DRAFT_00118 | pfam01370      | Epimerase                                                | 1.40E-29  |
| 2558669450 | DRAFT_00118 | Locus_type     | CDS                                                      |           |
| 2558669450 | DRAFT_00118 | Product_name   | Nucleoside-diphosphate-sugar epimerases                  |           |
| 2558669450 | DRAFT_00118 | Scaffold       | DRAFT_contig_70_5_len_108223_read_count_1902626.1        |           |
| 2558669450 | DRAFT_00118 | Coordinates    | 92751..93719(-)                                          |           |
| 2558669450 | DRAFT_00118 | DNA_length     | 969bp                                                    |           |
| 2558669450 | DRAFT_00118 | Protein_length | 322aa                                                    |           |

|            |             |                |                                                     |                                                   |          |
|------------|-------------|----------------|-----------------------------------------------------|---------------------------------------------------|----------|
| 2558669450 | DRAFT_00118 | GC             |                                                     |                                                   | 0.59     |
| 2558669451 | DRAFT_00119 | pfam01037      | AsnC_trans_reg                                      |                                                   | 1.10E-08 |
| 2558669451 | DRAFT_00119 | Locus_type     |                                                     | CDS                                               |          |
| 2558669451 | DRAFT_00119 | Product_name   |                                                     | Transcriptional regulators                        |          |
| 2558669451 | DRAFT_00119 | Scaffold       |                                                     | DRAFT_contig_70_5_len_108223_read_count_1902626.1 |          |
| 2558669451 | DRAFT_00119 | Coordinates    |                                                     | 93765..93995(-)                                   |          |
| 2558669451 | DRAFT_00119 | DNA_length     |                                                     | 231bp                                             |          |
| 2558669451 | DRAFT_00119 | Protein_length |                                                     | 76aa                                              |          |
| 2558669451 | DRAFT_00119 | GC             |                                                     |                                                   | 0.52     |
| 2558669452 | DRAFT_00120 | KEGG_module    | M00359: Aminoacyl-tRNA biosynthesis, eukaryotes     |                                                   |          |
| 2558669452 | DRAFT_00120 | KEGG_module    | M00360: Aminoacyl-tRNA biosynthesis, prokaryotes    |                                                   |          |
| 2558669452 | DRAFT_00120 | Metacyc        | TRNA-CHARGING-PWY: tRNA charging                    |                                                   |          |
| 2558669452 | DRAFT_00120 | IMG_pathway    | 493: L-histidine ligation to tRNA(His)              |                                                   |          |
| 2558669452 | DRAFT_00120 | COG_category   | [J] Translation, ribosomal structure and biogenesis |                                                   |          |
| 2558669452 | DRAFT_00120 | COG0124        | Histidyl-tRNA synthetase                            |                                                   | 3.00E-77 |
| 2558669452 | DRAFT_00120 | pfam13393      | tRNA-synt_His                                       |                                                   | 5.70E-36 |
| 2558669452 | DRAFT_00120 | pfam03129      | HGTP_anticodon                                      |                                                   | 4.40E-13 |
| 2558669452 | DRAFT_00120 | EC:6.1.1.21    | Histidine--tRNA ligase.                             |                                                   |          |
| 2558669452 | DRAFT_00120 | TIGR00442      | histidyl-tRNA synthetase                            |                                                   | 1.80E-95 |
| 2558669452 | DRAFT_00120 | KO:K01892      | histidyl-tRNA synthetase [EC:6.1.1.21]              |                                                   | 0.00E+00 |
| 2558669452 | DRAFT_00120 | ITERM:00386    | histidyl-tRNA synthetase (EC 6.1.1.21)              |                                                   |          |
| 2558669452 | DRAFT_00120 | Locus_type     |                                                     | CDS                                               |          |
| 2558669452 | DRAFT_00120 | Product_name   |                                                     | histidyl-tRNA synthetase (EC 6.1.1.21)            |          |
| 2558669452 | DRAFT_00120 | Scaffold       |                                                     | DRAFT_contig_70_5_len_108223_read_count_1902626.1 |          |
| 2558669452 | DRAFT_00120 | Coordinates    |                                                     | 94060..95271(-)                                   |          |
| 2558669452 | DRAFT_00120 | DNA_length     |                                                     | 1212bp                                            |          |
| 2558669452 | DRAFT_00120 | Protein_length |                                                     | 403aa                                             |          |
| 2558669452 | DRAFT_00120 | GC             |                                                     |                                                   | 0.6      |
| 2558669453 | DRAFT_00121 | pfam13177      | DNA_pol3_delta2                                     |                                                   | 4.00E-13 |
| 2558669453 | DRAFT_00121 | pfam08542      | Rep_fac_C                                           |                                                   | 2.60E-10 |
| 2558669453 | DRAFT_00121 | KO:K04801      | replication factor C small subunit                  |                                                   | 0.00E+00 |



|            |             |                |                                                                                                 |           |
|------------|-------------|----------------|-------------------------------------------------------------------------------------------------|-----------|
| 2558669453 | DRAFT_00121 | Locus_type     | CDS                                                                                             |           |
| 2558669453 | DRAFT_00121 | Product_name   | DNA polymerase III, gamma/tau subunits                                                          |           |
| 2558669453 | DRAFT_00121 | Scaffold       | DRAFT_contig_70_5_len_108223_read_count_1902626.1                                               |           |
| 2558669453 | DRAFT_00121 | Coordinates    | 95327..96277(-)                                                                                 |           |
| 2558669453 | DRAFT_00121 | DNA_length     | 951bp                                                                                           |           |
| 2558669453 | DRAFT_00121 | Protein_length | 316aa                                                                                           |           |
| 2558669453 | DRAFT_00121 | GC             |                                                                                                 | 0.58      |
| 2558669454 | DRAFT_00122 | pfam05916      | Sld5                                                                                            | 7.20E-07  |
| 2558669454 | DRAFT_00122 | Locus_type     | CDS                                                                                             |           |
| 2558669454 | DRAFT_00122 | Product_name   | GIN5 complex protein                                                                            |           |
| 2558669454 | DRAFT_00122 | Scaffold       | DRAFT_contig_70_5_len_108223_read_count_1902626.1                                               |           |
| 2558669454 | DRAFT_00122 | Coordinates    | 96567..97130(+)                                                                                 |           |
| 2558669454 | DRAFT_00122 | DNA_length     | 564bp                                                                                           |           |
| 2558669454 | DRAFT_00122 | Protein_length | 187aa                                                                                           |           |
| 2558669454 | DRAFT_00122 | GC             |                                                                                                 | 0.58      |
| 2558669455 | DRAFT_00123 | IMG_pathway    | 436: Archaeal replication initiation                                                            |           |
| 2558669455 | DRAFT_00123 | COG_category   | [L] Replication, recombination and repair                                                       |           |
| 2558669455 | DRAFT_00123 | COG1241        | Predicted ATPase involved in replication control, Cdc46/Mcm family                              | 0.00E+00  |
| 2558669455 | DRAFT_00123 | pfam14551      | MCM_N                                                                                           | 5.60E-16  |
| 2558669455 | DRAFT_00123 | pfam00493      | MCM                                                                                             | 1.60E-114 |
| 2558669455 | DRAFT_00123 | EC:3.6.4.-     | Hydrolases. Acting on acid anhydrides. Acting on acid anhydrides; involved in cellular and subc |           |
| 2558669455 | DRAFT_00123 | KO:K10726      | replicative DNA helicase Mcm [EC:3.6.4.-]                                                       | 0.00E+00  |
| 2558669455 | DRAFT_00123 | ITERM:00094    | replicative DNA helicase Mcm (EC 3.6.1.-)                                                       |           |
| 2558669455 | DRAFT_00123 | Locus_type     | CDS                                                                                             |           |
| 2558669455 | DRAFT_00123 | Product_name   | replicative DNA helicase Mcm (EC 3.6.1.-)                                                       |           |
| 2558669455 | DRAFT_00123 | Scaffold       | DRAFT_contig_70_5_len_108223_read_count_1902626.1                                               |           |
| 2558669455 | DRAFT_00123 | Coordinates    | 97137..99188(+)                                                                                 |           |
| 2558669455 | DRAFT_00123 | DNA_length     | 2052bp                                                                                          |           |
| 2558669455 | DRAFT_00123 | Protein_length | 683aa                                                                                           |           |
| 2558669455 | DRAFT_00123 | GC             |                                                                                                 | 0.58      |
| 2558669456 | DRAFT_00124 | COG_category   | [R] General function prediction only                                                            |           |

|            |             |                |                                                                                                 |          |
|------------|-------------|----------------|-------------------------------------------------------------------------------------------------|----------|
| 2558669456 | DRAFT_00124 | COG1204        | Superfamily II helicase                                                                         | 0.00E+00 |
| 2558669456 | DRAFT_00124 | pfam00270      | DEAD                                                                                            | 1.30E-24 |
| 2558669456 | DRAFT_00124 | pfam00271      | Helicase_C                                                                                      | 4.00E-07 |
| 2558669456 | DRAFT_00124 | pfam14520      | HHH_5                                                                                           | 5.40E-12 |
| 2558669456 | DRAFT_00124 | EC:3.6.4.-     | Hydrolases. Acting on acid anhydrides. Acting on acid anhydrides; involved in cellular and subc |          |
| 2558669456 | DRAFT_00124 | KO:K03726      | helicase [EC:3.6.4.-]                                                                           | 0.00E+00 |
| 2558669456 | DRAFT_00124 | Locus_type     | CDS                                                                                             |          |
| 2558669456 | DRAFT_00124 | Product_name   | Superfamily II helicase                                                                         |          |
| 2558669456 | DRAFT_00124 | Scaffold       | DRAFT_contig_70_5_len_108223_read_count_1902626.1                                               |          |
| 2558669456 | DRAFT_00124 | Coordinates    | 99206..101350(+)                                                                                |          |
| 2558669456 | DRAFT_00124 | DNA_length     | 2145bp                                                                                          |          |
| 2558669456 | DRAFT_00124 | Protein_length | 714aa                                                                                           |          |
| 2558669456 | DRAFT_00124 | GC             |                                                                                                 | 0.61     |
| 2558669457 | DRAFT_00125 | pfam00733      | Asn_synthase                                                                                    | 9.80E-32 |
| 2558669457 | DRAFT_00125 | Locus_type     | CDS                                                                                             |          |
| 2558669457 | DRAFT_00125 | Product_name   | Asparagine synthase (glutamine-hydrolyzing)                                                     |          |
| 2558669457 | DRAFT_00125 | Scaffold       | DRAFT_contig_70_5_len_108223_read_count_1902626.1                                               |          |
| 2558669457 | DRAFT_00125 | Coordinates    | 101422..102105(+)                                                                               |          |
| 2558669457 | DRAFT_00125 | DNA_length     | 684bp                                                                                           |          |
| 2558669457 | DRAFT_00125 | Protein_length | 227aa                                                                                           |          |
| 2558669457 | DRAFT_00125 | GC             |                                                                                                 | 0.62     |
| 2558669458 | DRAFT_00126 | Locus_type     | CDS                                                                                             |          |
| 2558669458 | DRAFT_00126 | Product_name   | hypothetical protein                                                                            |          |
| 2558669458 | DRAFT_00126 | Scaffold       | DRAFT_contig_70_5_len_108223_read_count_1902626.1                                               |          |
| 2558669458 | DRAFT_00126 | Coordinates    | 102142..102405(+)                                                                               |          |
| 2558669458 | DRAFT_00126 | DNA_length     | 264bp                                                                                           |          |
| 2558669458 | DRAFT_00126 | Protein_length | 87aa                                                                                            |          |
| 2558669458 | DRAFT_00126 | GC             |                                                                                                 | 0.58     |
| 2558669459 | DRAFT_00127 | pfam13659      | Methyltransf_26                                                                                 | 2.40E-06 |
| 2558669459 | DRAFT_00127 | Locus_type     | CDS                                                                                             |          |
| 2558669459 | DRAFT_00127 | Product_name   | Methyltransferase domain                                                                        |          |

|            |             |                |                                                       |                                                   |           |
|------------|-------------|----------------|-------------------------------------------------------|---------------------------------------------------|-----------|
| 2558669459 | DRAFT_00127 | Scaffold       |                                                       | DRAFT_contig_70_5_len_108223_read_count_1902626.1 |           |
| 2558669459 | DRAFT_00127 | Coordinates    |                                                       | 102402..103028(+)                                 |           |
| 2558669459 | DRAFT_00127 | DNA_length     |                                                       | 627bp                                             |           |
| 2558669459 | DRAFT_00127 | Protein_length |                                                       | 208aa                                             |           |
| 2558669459 | DRAFT_00127 | GC             |                                                       |                                                   | 0.58      |
| 2558669460 | DRAFT_00128 | pfam04967      | HTH_10                                                |                                                   | 2.00E-17  |
| 2558669460 | DRAFT_00128 | Locus_type     |                                                       | CDS                                               |           |
| 2558669460 | DRAFT_00128 | Product_name   |                                                       | Predicted DNA binding protein                     |           |
| 2558669460 | DRAFT_00128 | Scaffold       |                                                       | DRAFT_contig_70_5_len_108223_read_count_1902626.1 |           |
| 2558669460 | DRAFT_00128 | Coordinates    |                                                       | 103042..103686(+)                                 |           |
| 2558669460 | DRAFT_00128 | DNA_length     |                                                       | 645bp                                             |           |
| 2558669460 | DRAFT_00128 | Protein_length |                                                       | 214aa                                             |           |
| 2558669460 | DRAFT_00128 | GC             |                                                       |                                                   | 0.58      |
| 2558669461 | DRAFT_00129 | Metacyc        | TRYPDEG-PWY: tryptophan degradation II (via pyruvate) |                                                   |           |
| 2558669461 | DRAFT_00129 | COG_category   | [E] Amino acid transport and metabolism               |                                                   |           |
| 2558669461 | DRAFT_00129 | COG3033        | Tryptophanase                                         |                                                   | 7.00E-129 |
| 2558669461 | DRAFT_00129 | pfam01212      | Beta_elim_lyase                                       |                                                   | 3.10E-64  |
| 2558669461 | DRAFT_00129 | EC:4.1.99.1    | Tryptophanase.                                        |                                                   |           |
| 2558669461 | DRAFT_00129 | KO:K01667      | tryptophanase [EC:4.1.99.1]                           |                                                   | 0.00E+00  |
| 2558669461 | DRAFT_00129 | Locus_type     |                                                       | CDS                                               |           |
| 2558669461 | DRAFT_00129 | Product_name   |                                                       | Tryptophanase                                     |           |
| 2558669461 | DRAFT_00129 | Scaffold       |                                                       | DRAFT_contig_70_5_len_108223_read_count_1902626.1 |           |
| 2558669461 | DRAFT_00129 | Coordinates    |                                                       | 103951..105393(+)                                 |           |
| 2558669461 | DRAFT_00129 | DNA_length     |                                                       | 1443bp                                            |           |
| 2558669461 | DRAFT_00129 | Protein_length |                                                       | 480aa                                             |           |
| 2558669461 | DRAFT_00129 | GC             |                                                       |                                                   | 0.54      |
| 2558669462 | DRAFT_00130 | COG_category   | [G] Carbohydrate transport and metabolism             |                                                   |           |
| 2558669462 | DRAFT_00130 | COG2814        | Arabinose efflux permease                             |                                                   | 9.00E-11  |
| 2558669462 | DRAFT_00130 | pfam07690      | MFS_1                                                 |                                                   | 4.00E-23  |
| 2558669462 | DRAFT_00130 | Locus_type     |                                                       | CDS                                               |           |
| 2558669462 | DRAFT_00130 | Product_name   |                                                       | Arabinose efflux permease                         |           |

|            |             |                |                                                                       |                                                                       |           |
|------------|-------------|----------------|-----------------------------------------------------------------------|-----------------------------------------------------------------------|-----------|
| 2558669462 | DRAFT_00130 | Scaffold       |                                                                       | DRAFT_contig_70_5_len_108223_read_count_1902626.1                     |           |
| 2558669462 | DRAFT_00130 | Coordinates    |                                                                       | 105839..107053(+)                                                     |           |
| 2558669462 | DRAFT_00130 | DNA_length     |                                                                       | 1215bp                                                                |           |
| 2558669462 | DRAFT_00130 | Protein_length |                                                                       | 404aa                                                                 |           |
| 2558669462 | DRAFT_00130 | GC             |                                                                       |                                                                       | 0.58      |
| 2558669462 | DRAFT_00130 | Transmembrane  |                                                                       | Yes                                                                   |           |
| 2558669463 | DRAFT_00131 | pfam08241      | Methyltransf_11                                                       |                                                                       | 2.40E-20  |
| 2558669463 | DRAFT_00131 | Locus_type     |                                                                       | CDS                                                                   |           |
| 2558669463 | DRAFT_00131 | Product_name   |                                                                       | Methylase involved in ubiquinone/menaquinone biosynthesis             |           |
| 2558669463 | DRAFT_00131 | Scaffold       |                                                                       | DRAFT_contig_70_5_len_108223_read_count_1902626.1                     |           |
| 2558669463 | DRAFT_00131 | Coordinates    |                                                                       | 107311..108111(-)                                                     |           |
| 2558669463 | DRAFT_00131 | DNA_length     |                                                                       | 801bp                                                                 |           |
| 2558669463 | DRAFT_00131 | Protein_length |                                                                       | 266aa                                                                 |           |
| 2558669463 | DRAFT_00131 | GC             |                                                                       |                                                                       | 0.58      |
| 2558669464 | DRAFT_00132 | KEGG_module    | M00239: Peptides/nickel transport system                              |                                                                       |           |
| 2558669464 | DRAFT_00132 | COG_category   | [E] Amino acid transport and metabolism                               |                                                                       |           |
| 2558669464 | DRAFT_00132 | COG_category   | [P] Inorganic ion transport and metabolism                            |                                                                       |           |
| 2558669464 | DRAFT_00132 | COG0444        | ABC-type dipeptide/oligopeptide/nickel transport system, ATPase com   |                                                                       | 9.00E-120 |
| 2558669464 | DRAFT_00132 | pfam08352      | oligo_HPY                                                             |                                                                       | 4.70E-21  |
| 2558669464 | DRAFT_00132 | pfam00005      | ABC_tran                                                              |                                                                       | 7.80E-26  |
| 2558669464 | DRAFT_00132 | TIGR01727      | oligopeptide/dipeptide ABC transporter, ATP-binding protein, C-termin |                                                                       | 1.50E-34  |
| 2558669464 | DRAFT_00132 | KO:K02031      | peptide/nickel transport system ATP-binding protein                   |                                                                       | 0.00E+00  |
| 2558669464 | DRAFT_00132 | Locus_type     |                                                                       | CDS                                                                   |           |
| 2558669464 | DRAFT_00132 | Product_name   |                                                                       | oligopeptide/dipeptide ABC transporter, ATP-binding protein, C-termin |           |
| 2558669464 | DRAFT_00132 | Scaffold       |                                                                       | DRAFT_contig_70_6_len_107089_read_count_1768889.2                     |           |
| 2558669464 | DRAFT_00132 | Coordinates    |                                                                       | 2..955(-)                                                             |           |
| 2558669464 | DRAFT_00132 | DNA_length     |                                                                       | 954bp                                                                 |           |
| 2558669464 | DRAFT_00132 | Protein_length |                                                                       | 318aa                                                                 |           |
| 2558669464 | DRAFT_00132 | GC             |                                                                       |                                                                       | 0.6       |
| 2558669465 | DRAFT_00133 | KEGG_module    | M00239: Peptides/nickel transport system                              |                                                                       |           |
| 2558669465 | DRAFT_00133 | COG_category   | [P] Inorganic ion transport and metabolism                            |                                                                       |           |

|            |             |                |                                                                      |          |
|------------|-------------|----------------|----------------------------------------------------------------------|----------|
| 2558669465 | DRAFT_00133 | COG_category   | [E] Amino acid transport and metabolism                              |          |
| 2558669465 | DRAFT_00133 | COG1173        | ABC-type dipeptide/oligopeptide/nickel transport systems, permease c | 9.00E-62 |
| 2558669465 | DRAFT_00133 | pfam12911      | OppC_N                                                               | 3.30E-06 |
| 2558669465 | DRAFT_00133 | pfam00528      | BPD_transp_1                                                         | 8.80E-25 |
| 2558669465 | DRAFT_00133 | KO:K02034      | peptide/nickel transport system permease protein                     | 0.00E+00 |
| 2558669465 | DRAFT_00133 | Locus_type     | CDS                                                                  |          |
| 2558669465 | DRAFT_00133 | Product_name   | ABC-type dipeptide/oligopeptide/nickel transport systems, permease   |          |
| 2558669465 | DRAFT_00133 | Scaffold       | DRAFT_contig_70_6_len_107089_read_count_1768889.2                    |          |
| 2558669465 | DRAFT_00133 | Coordinates    | 970..2526(-)                                                         |          |
| 2558669465 | DRAFT_00133 | DNA_length     | 1557bp                                                               |          |
| 2558669465 | DRAFT_00133 | Protein_length | 518aa                                                                |          |
| 2558669465 | DRAFT_00133 | GC             |                                                                      | 0.58     |
| 2558669465 | DRAFT_00133 | Transmembrane  | Yes                                                                  |          |
| 2558669466 | DRAFT_00134 | KEGG_module    | M00239: Peptides/nickel transport system                             |          |
| 2558669466 | DRAFT_00134 | COG_category   | [P] Inorganic ion transport and metabolism                           |          |
| 2558669466 | DRAFT_00134 | COG_category   | [E] Amino acid transport and metabolism                              |          |
| 2558669466 | DRAFT_00134 | COG0601        | ABC-type dipeptide/oligopeptide/nickel transport systems, permease c | 2.00E-60 |
| 2558669466 | DRAFT_00134 | pfam00528      | BPD_transp_1                                                         | 8.30E-38 |
| 2558669466 | DRAFT_00134 | KO:K02033      | peptide/nickel transport system permease protein                     | 0.00E+00 |
| 2558669466 | DRAFT_00134 | Locus_type     | CDS                                                                  |          |
| 2558669466 | DRAFT_00134 | Product_name   | ABC-type dipeptide/oligopeptide/nickel transport systems, permease   |          |
| 2558669466 | DRAFT_00134 | Scaffold       | DRAFT_contig_70_6_len_107089_read_count_1768889.2                    |          |
| 2558669466 | DRAFT_00134 | Coordinates    | 2523..3482(-)                                                        |          |
| 2558669466 | DRAFT_00134 | DNA_length     | 960bp                                                                |          |
| 2558669466 | DRAFT_00134 | Protein_length | 319aa                                                                |          |
| 2558669466 | DRAFT_00134 | GC             |                                                                      | 0.55     |
| 2558669466 | DRAFT_00134 | Transmembrane  | Yes                                                                  |          |
| 2558669467 | DRAFT_00135 | pfam00496      | SBP_bac_5                                                            | 2.30E-08 |
| 2558669467 | DRAFT_00135 | pfam00496      | SBP_bac_5                                                            | 2.00E-11 |
| 2558669467 | DRAFT_00135 | Locus_type     | CDS                                                                  |          |
| 2558669467 | DRAFT_00135 | Product_name   | Bacterial extracellular solute-binding proteins, family 5 Middle     |          |
| 2558669467 | DRAFT_00135 | Scaffold       | DRAFT_contig_70_6_len_107089_read_count_1768889.2                    |          |

|            |             |                |                                                      |          |
|------------|-------------|----------------|------------------------------------------------------|----------|
| 2558669467 | DRAFT_00135 | Coordinates    | 3583..5970(-)                                        |          |
| 2558669467 | DRAFT_00135 | DNA_length     | 2388bp                                               |          |
| 2558669467 | DRAFT_00135 | Protein_length | 795aa                                                |          |
| 2558669467 | DRAFT_00135 | GC             |                                                      | 0.56     |
| 2558669467 | DRAFT_00135 | Signal_peptide | Yes                                                  |          |
| 2558669467 | DRAFT_00135 | Transmembrane  | Yes                                                  |          |
| 2558669468 | DRAFT_00136 | pfam02475      | Met_10                                               | 3.40E-53 |
| 2558669468 | DRAFT_00136 | EC:2.1.1.228   | tRNA (guanine(37)-N(1))-methyltransferase.           |          |
| 2558669468 | DRAFT_00136 | KO:K15429      | tRNA (guanine37-N1)-methyltransferase [EC:2.1.1.228] | 1.20E-40 |
| 2558669468 | DRAFT_00136 | Locus_type     | CDS                                                  |          |
| 2558669468 | DRAFT_00136 | Product_name   | Predicted methyltransferase                          |          |
| 2558669468 | DRAFT_00136 | Scaffold       | DRAFT_contig_70_6_len_107089_read_count_1768889.2    |          |
| 2558669468 | DRAFT_00136 | Coordinates    | 6523..7182(+)                                        |          |
| 2558669468 | DRAFT_00136 | DNA_length     | 660bp                                                |          |
| 2558669468 | DRAFT_00136 | Protein_length | 219aa                                                |          |
| 2558669468 | DRAFT_00136 | GC             |                                                      | 0.6      |
| 2558669469 | DRAFT_00137 | COG_category   | [C] Energy production and conversion                 |          |
| 2558669469 | DRAFT_00137 | COG0277        | FAD/FMN-containing dehydrogenases                    | 2.00E-50 |
| 2558669469 | DRAFT_00137 | pfam02913      | FAD-oxidase_C                                        | 3.10E-41 |
| 2558669469 | DRAFT_00137 | pfam01565      | FAD_binding_4                                        | 5.20E-23 |
| 2558669469 | DRAFT_00137 | Locus_type     | CDS                                                  |          |
| 2558669469 | DRAFT_00137 | Product_name   | FAD/FMN-containing dehydrogenases                    |          |
| 2558669469 | DRAFT_00137 | Scaffold       | DRAFT_contig_70_6_len_107089_read_count_1768889.2    |          |
| 2558669469 | DRAFT_00137 | Coordinates    | 7207..8787(+)                                        |          |
| 2558669469 | DRAFT_00137 | DNA_length     | 1581bp                                               |          |
| 2558669469 | DRAFT_00137 | Protein_length | 526aa                                                |          |
| 2558669469 | DRAFT_00137 | GC             |                                                      | 0.61     |
| 2558669470 | DRAFT_00138 | COG_category   | [S] Function unknown                                 |          |
| 2558669470 | DRAFT_00138 | COG1628        | Uncharacterized conserved protein                    | 2.00E-31 |
| 2558669470 | DRAFT_00138 | pfam01949      | DUF99                                                | 2.10E-52 |
| 2558669470 | DRAFT_00138 | KO:K09120      | hypothetical protein                                 | 2.80E-45 |

|            |             |                |                                                                                |          |
|------------|-------------|----------------|--------------------------------------------------------------------------------|----------|
| 2558669470 | DRAFT_00138 | Locus_type     | CDS                                                                            |          |
| 2558669470 | DRAFT_00138 | Product_name   | Uncharacterized conserved protein                                              |          |
| 2558669470 | DRAFT_00138 | Scaffold       | DRAFT_contig_70_6_len_107089_read_count_1768889.2                              |          |
| 2558669470 | DRAFT_00138 | Coordinates    | 8780..9346(-)                                                                  |          |
| 2558669470 | DRAFT_00138 | DNA_length     | 567bp                                                                          |          |
| 2558669470 | DRAFT_00138 | Protein_length | 188aa                                                                          |          |
| 2558669470 | DRAFT_00138 | GC             |                                                                                | 0.6      |
|            |             |                |                                                                                |          |
| 2558669471 | DRAFT_00139 | COG_category   | [R] General function prediction only                                           |          |
| 2558669471 | DRAFT_00139 | COG1661        | Predicted DNA-binding protein with PD1-like DNA-binding motif                  | 5.00E-23 |
| 2558669471 | DRAFT_00139 | pfam03479      | DUF296                                                                         | 1.60E-24 |
| 2558669471 | DRAFT_00139 | Locus_type     | CDS                                                                            |          |
| 2558669471 | DRAFT_00139 | Product_name   | Predicted DNA-binding protein with PD1-like DNA-binding motif                  |          |
| 2558669471 | DRAFT_00139 | Scaffold       | DRAFT_contig_70_6_len_107089_read_count_1768889.2                              |          |
| 2558669471 | DRAFT_00139 | Coordinates    | 9393..9815(+)                                                                  |          |
| 2558669471 | DRAFT_00139 | DNA_length     | 423bp                                                                          |          |
| 2558669471 | DRAFT_00139 | Protein_length | 140aa                                                                          |          |
| 2558669471 | DRAFT_00139 | GC             |                                                                                | 0.56     |
|            |             |                |                                                                                |          |
| 2558669472 | DRAFT_00140 | KEGG_module    | M00527: Lysine biosynthesis, DAP aminotransferase pathway, aspartate => lysine |          |
| 2558669472 | DRAFT_00140 | KEGG_module    | M00525: Lysine biosynthesis, acetyl-DAP pathway, aspartate => lysine           |          |
| 2558669472 | DRAFT_00140 | KEGG_module    | M00016: Lysine biosynthesis, succinyl-DAP pathway, aspartate => lysine         |          |
| 2558669472 | DRAFT_00140 | KEGG_module    | M00526: Lysine biosynthesis, DAP dehydrogenase pathway, aspartate => lysine    |          |
| 2558669472 | DRAFT_00140 | COG_category   | [S] Function unknown                                                           |          |
| 2558669472 | DRAFT_00140 | COG3804        | Uncharacterized conserved protein related to dihydrodipicolinate reductase     | 9.00E-27 |
| 2558669472 | DRAFT_00140 | EC:1.3.1.26    | Dihydrodipicolinate reductase.                                                 |          |
| 2558669472 | DRAFT_00140 | KO:K00215      | dihydrodipicolinate reductase [EC:1.3.1.26]                                    | 0.00E+00 |
| 2558669472 | DRAFT_00140 | Locus_type     | CDS                                                                            |          |
| 2558669472 | DRAFT_00140 | Product_name   | Uncharacterized conserved protein related to dihydrodipicolinate reductase     |          |
| 2558669472 | DRAFT_00140 | Scaffold       | DRAFT_contig_70_6_len_107089_read_count_1768889.2                              |          |
| 2558669472 | DRAFT_00140 | Coordinates    | 10150..11085(-)                                                                |          |
| 2558669472 | DRAFT_00140 | DNA_length     | 936bp                                                                          |          |
| 2558669472 | DRAFT_00140 | Protein_length | 311aa                                                                          |          |
| 2558669472 | DRAFT_00140 | GC             |                                                                                | 0.61     |

|            |             |                |         |                                                   |          |
|------------|-------------|----------------|---------|---------------------------------------------------|----------|
| 2558669473 | DRAFT_00141 | Locus_type     |         | CDS                                               |          |
| 2558669473 | DRAFT_00141 | Product_name   |         | hypothetical protein                              |          |
| 2558669473 | DRAFT_00141 | Scaffold       |         | DRAFT_contig_70_6_len_107089_read_count_1768889.2 |          |
| 2558669473 | DRAFT_00141 | Coordinates    |         | 11145..11333(+)                                   |          |
| 2558669473 | DRAFT_00141 | DNA_length     |         | 189bp                                             |          |
| 2558669473 | DRAFT_00141 | Protein_length |         | 62aa                                              |          |
| 2558669473 | DRAFT_00141 | GC             |         |                                                   | 0.5      |
|            |             |                |         |                                                   |          |
| 2558669474 | DRAFT_00142 | Locus_type     |         | CDS                                               |          |
| 2558669474 | DRAFT_00142 | Product_name   |         | hypothetical protein                              |          |
| 2558669474 | DRAFT_00142 | Scaffold       |         | DRAFT_contig_70_6_len_107089_read_count_1768889.2 |          |
| 2558669474 | DRAFT_00142 | Coordinates    |         | 11273..11545(-)                                   |          |
| 2558669474 | DRAFT_00142 | DNA_length     |         | 273bp                                             |          |
| 2558669474 | DRAFT_00142 | Protein_length |         | 90aa                                              |          |
| 2558669474 | DRAFT_00142 | GC             |         |                                                   | 0.55     |
|            |             |                |         |                                                   |          |
| 2558669475 | DRAFT_00143 | pfam04471      | Mrr_cat |                                                   | 4.40E-06 |
| 2558669475 | DRAFT_00143 | Locus_type     |         | CDS                                               |          |
| 2558669475 | DRAFT_00143 | Product_name   |         | Restriction endonuclease                          |          |
| 2558669475 | DRAFT_00143 | Scaffold       |         | DRAFT_contig_70_6_len_107089_read_count_1768889.2 |          |
| 2558669475 | DRAFT_00143 | Coordinates    |         | 11674..12237(-)                                   |          |
| 2558669475 | DRAFT_00143 | DNA_length     |         | 564bp                                             |          |
| 2558669475 | DRAFT_00143 | Protein_length |         | 187aa                                             |          |
| 2558669475 | DRAFT_00143 | GC             |         |                                                   | 0.62     |
|            |             |                |         |                                                   |          |
| 2558669476 | DRAFT_00144 | Locus_type     |         | CDS                                               |          |
| 2558669476 | DRAFT_00144 | Product_name   |         | hypothetical protein                              |          |
| 2558669476 | DRAFT_00144 | Scaffold       |         | DRAFT_contig_70_6_len_107089_read_count_1768889.2 |          |
| 2558669476 | DRAFT_00144 | Coordinates    |         | 12444..12566(+)                                   |          |
| 2558669476 | DRAFT_00144 | DNA_length     |         | 123bp                                             |          |
| 2558669476 | DRAFT_00144 | Protein_length |         | 40aa                                              |          |
| 2558669476 | DRAFT_00144 | GC             |         |                                                   | 0.55     |



|            |             |                |                                                   |          |
|------------|-------------|----------------|---------------------------------------------------|----------|
| 2558669477 | DRAFT_00145 | pfam00717      | Peptidase_S24                                     | 1.70E-07 |
| 2558669477 | DRAFT_00145 | TIGR02228      | signal peptidase I, archaeal type                 | 1.00E-22 |
| 2558669477 | DRAFT_00145 | Locus_type     | CDS                                               |          |
| 2558669477 | DRAFT_00145 | Product_name   | signal peptidase I, archaeal type                 |          |
| 2558669477 | DRAFT_00145 | Scaffold       | DRAFT_contig_70_6_len_107089_read_count_1768889.2 |          |
| 2558669477 | DRAFT_00145 | Coordinates    | 12630..13316(+)                                   |          |
| 2558669477 | DRAFT_00145 | DNA_length     | 687bp                                             |          |
| 2558669477 | DRAFT_00145 | Protein_length | 228aa                                             |          |
| 2558669477 | DRAFT_00145 | GC             |                                                   | 0.57     |
| 2558669477 | DRAFT_00145 | Transmembrane  | Yes                                               |          |
| 2558669478 | DRAFT_00146 | Locus_type     | CDS                                               |          |
| 2558669478 | DRAFT_00146 | Product_name   | hypothetical protein                              |          |
| 2558669478 | DRAFT_00146 | Scaffold       | DRAFT_contig_70_6_len_107089_read_count_1768889.2 |          |
| 2558669478 | DRAFT_00146 | Coordinates    | 13696..14010(+)                                   |          |
| 2558669478 | DRAFT_00146 | DNA_length     | 315bp                                             |          |
| 2558669478 | DRAFT_00146 | Protein_length | 104aa                                             |          |
| 2558669478 | DRAFT_00146 | GC             |                                                   | 0.56     |
| 2558669478 | DRAFT_00146 | Transmembrane  | Yes                                               |          |
| 2558669479 | DRAFT_00147 | pfam12840      | HTH_20                                            | 1.10E-07 |
| 2558669479 | DRAFT_00147 | Locus_type     | CDS                                               |          |
| 2558669479 | DRAFT_00147 | Product_name   | Helix-turn-helix domain                           |          |
| 2558669479 | DRAFT_00147 | Scaffold       | DRAFT_contig_70_6_len_107089_read_count_1768889.2 |          |
| 2558669479 | DRAFT_00147 | Coordinates    | 14007..14372(-)                                   |          |
| 2558669479 | DRAFT_00147 | DNA_length     | 366bp                                             |          |
| 2558669479 | DRAFT_00147 | Protein_length | 121aa                                             |          |
| 2558669479 | DRAFT_00147 | GC             |                                                   | 0.53     |
| 2558669480 | DRAFT_00148 | Locus_type     | CDS                                               |          |
| 2558669480 | DRAFT_00148 | Product_name   | hypothetical protein                              |          |
| 2558669480 | DRAFT_00148 | Scaffold       | DRAFT_contig_70_6_len_107089_read_count_1768889.2 |          |
| 2558669480 | DRAFT_00148 | Coordinates    | 14413..14541(-)                                   |          |
| 2558669480 | DRAFT_00148 | DNA_length     | 129bp                                             |          |

|            |             |                |                                                                |          |
|------------|-------------|----------------|----------------------------------------------------------------|----------|
| 2558669480 | DRAFT_00148 | Protein_length | 42aa                                                           |          |
| 2558669480 | DRAFT_00148 | GC             |                                                                | 0.54     |
| 2558669481 | DRAFT_00149 | pfam00339      | Arrestin_N                                                     | 4.10E-05 |
| 2558669481 | DRAFT_00149 | Locus_type     | CDS                                                            |          |
| 2558669481 | DRAFT_00149 | Product_name   | Arrestin (or S-antigen), N-terminal domain                     |          |
| 2558669481 | DRAFT_00149 | Scaffold       | DRAFT_contig_70_6_len_107089_read_count_1768889.2              |          |
| 2558669481 | DRAFT_00149 | Coordinates    | 14578..15156(+)                                                |          |
| 2558669481 | DRAFT_00149 | DNA_length     | 579bp                                                          |          |
| 2558669481 | DRAFT_00149 | Protein_length | 192aa                                                          |          |
| 2558669481 | DRAFT_00149 | GC             |                                                                | 0.54     |
| 2558669482 | DRAFT_00150 | Locus_type     | CDS                                                            |          |
| 2558669482 | DRAFT_00150 | Product_name   | hypothetical protein                                           |          |
| 2558669482 | DRAFT_00150 | Scaffold       | DRAFT_contig_70_6_len_107089_read_count_1768889.2              |          |
| 2558669482 | DRAFT_00150 | Coordinates    | 15533..15745(+)                                                |          |
| 2558669482 | DRAFT_00150 | DNA_length     | 213bp                                                          |          |
| 2558669482 | DRAFT_00150 | Protein_length | 70aa                                                           |          |
| 2558669482 | DRAFT_00150 | GC             |                                                                | 0.46     |
| 2558669482 | DRAFT_00150 | Transmembrane  | Yes                                                            |          |
| 2558669483 | DRAFT_00151 | Locus_type     | CDS                                                            |          |
| 2558669483 | DRAFT_00151 | Product_name   | hypothetical protein                                           |          |
| 2558669483 | DRAFT_00151 | Scaffold       | DRAFT_contig_70_6_len_107089_read_count_1768889.2              |          |
| 2558669483 | DRAFT_00151 | Coordinates    | 15903..16091(-)                                                |          |
| 2558669483 | DRAFT_00151 | DNA_length     | 189bp                                                          |          |
| 2558669483 | DRAFT_00151 | Protein_length | 62aa                                                           |          |
| 2558669483 | DRAFT_00151 | GC             |                                                                | 0.53     |
| 2558669484 | DRAFT_00152 | COG_category   | [K] Transcription                                              |          |
| 2558669484 | DRAFT_00152 | COG2101        | TATA-box binding protein (TBP), component of TFIID and TFIIB   | 5.00E-55 |
| 2558669484 | DRAFT_00152 | pfam00352      | TBP                                                            | 3.40E-29 |
| 2558669484 | DRAFT_00152 | pfam00352      | TBP                                                            | 3.60E-31 |
| 2558669484 | DRAFT_00152 | KO:K03120      | transcription initiation factor TFIID TATA-box-binding protein | 0.00E+00 |

|            |             |                |                                                                       |          |
|------------|-------------|----------------|-----------------------------------------------------------------------|----------|
| 2558669484 | DRAFT_00152 | ITERM:01960    | TATA binding protein of transcription factor TFIID                    |          |
| 2558669484 | DRAFT_00152 | Locus_type     | CDS                                                                   |          |
| 2558669484 | DRAFT_00152 | Product_name   | TATA binding protein of transcription factor TFIID                    |          |
| 2558669484 | DRAFT_00152 | Scaffold       | DRAFT_contig_70_6_len_107089_read_count_1768889.2                     |          |
| 2558669484 | DRAFT_00152 | Coordinates    | 16184..16741(+)                                                       |          |
| 2558669484 | DRAFT_00152 | DNA_length     | 558bp                                                                 |          |
| 2558669484 | DRAFT_00152 | Protein_length | 185aa                                                                 |          |
| 2558669484 | DRAFT_00152 | GC             |                                                                       | 0.53     |
|            |             |                |                                                                       |          |
| 2558669485 | DRAFT_00153 | KEGG_module    | M00051: Uridine monophosphate biosynthesis, glutamine (+ PRPP) => UMP |          |
| 2558669485 | DRAFT_00153 | Metacyc        | PWY-5686: UMP biosynthesis                                            |          |
| 2558669485 | DRAFT_00153 | IMG_pathway    | 321: Uridine 5'-monophosphate biosynthesis                            |          |
| 2558669485 | DRAFT_00153 | COG_category   | [F] Nucleotide transport and metabolism                               |          |
| 2558669485 | DRAFT_00153 | COG0461        | Orotate phosphoribosyltransferase                                     | 3.00E-33 |
| 2558669485 | DRAFT_00153 | pfam00156      | Pribosyltran                                                          | 5.50E-09 |
| 2558669485 | DRAFT_00153 | EC:2.4.2.10    | Orotate phosphoribosyltransferase.                                    |          |
| 2558669485 | DRAFT_00153 | TIGR00336      | orotate phosphoribosyltransferase                                     | 2.00E-32 |
| 2558669485 | DRAFT_00153 | KO:K00762      | orotate phosphoribosyltransferase [EC:2.4.2.10]                       | 9.90E-34 |
| 2558669485 | DRAFT_00153 | ITERM:01392    | orotate phosphoribosyltransferase (EC 2.4.2.10)                       |          |
| 2558669485 | DRAFT_00153 | Locus_type     | CDS                                                                   |          |
| 2558669485 | DRAFT_00153 | Product_name   | orotate phosphoribosyltransferase (EC 2.4.2.10)                       |          |
| 2558669485 | DRAFT_00153 | Scaffold       | DRAFT_contig_70_6_len_107089_read_count_1768889.2                     |          |
| 2558669485 | DRAFT_00153 | Coordinates    | 16735..17352(-)                                                       |          |
| 2558669485 | DRAFT_00153 | DNA_length     | 618bp                                                                 |          |
| 2558669485 | DRAFT_00153 | Protein_length | 205aa                                                                 |          |
| 2558669485 | DRAFT_00153 | GC             |                                                                       | 0.6      |
|            |             |                |                                                                       |          |
| 2558669486 | DRAFT_00154 | Locus_type     | CDS                                                                   |          |
| 2558669486 | DRAFT_00154 | Product_name   | hypothetical protein                                                  |          |
| 2558669486 | DRAFT_00154 | Scaffold       | DRAFT_contig_70_6_len_107089_read_count_1768889.2                     |          |
| 2558669486 | DRAFT_00154 | Coordinates    | 17407..18507(+)                                                       |          |
| 2558669486 | DRAFT_00154 | DNA_length     | 1101bp                                                                |          |
| 2558669486 | DRAFT_00154 | Protein_length | 366aa                                                                 |          |
| 2558669486 | DRAFT_00154 | GC             |                                                                       | 0.61     |

|            |             |                |               |                                                   |          |
|------------|-------------|----------------|---------------|---------------------------------------------------|----------|
| 2558669487 | DRAFT_00155 | pfam02163      | Peptidase_M50 |                                                   | 1.80E-07 |
| 2558669487 | DRAFT_00155 | Locus_type     |               | CDS                                               |          |
| 2558669487 | DRAFT_00155 | Product_name   |               | Peptidase family M50                              |          |
| 2558669487 | DRAFT_00155 | Scaffold       |               | DRAFT_contig_70_6_len_107089_read_count_1768889.2 |          |
| 2558669487 | DRAFT_00155 | Coordinates    |               | 18499..19647(-)                                   |          |
| 2558669487 | DRAFT_00155 | DNA_length     |               | 1149bp                                            |          |
| 2558669487 | DRAFT_00155 | Protein_length |               | 382aa                                             |          |
| 2558669487 | DRAFT_00155 | GC             |               |                                                   | 0.61     |
| 2558669487 | DRAFT_00155 | Transmembrane  |               | Yes                                               |          |
| 2558669488 | DRAFT_00156 | Locus_type     |               | CDS                                               |          |
| 2558669488 | DRAFT_00156 | Product_name   |               | hypothetical protein                              |          |
| 2558669488 | DRAFT_00156 | Scaffold       |               | DRAFT_contig_70_6_len_107089_read_count_1768889.2 |          |
| 2558669488 | DRAFT_00156 | Coordinates    |               | 19964..20167(+)                                   |          |
| 2558669488 | DRAFT_00156 | DNA_length     |               | 204bp                                             |          |
| 2558669488 | DRAFT_00156 | Protein_length |               | 67aa                                              |          |
| 2558669488 | DRAFT_00156 | GC             |               |                                                   | 0.49     |
| 2558669488 | DRAFT_00156 | Transmembrane  |               | Yes                                               |          |
| 2558669489 | DRAFT_00157 | Locus_type     |               | CDS                                               |          |
| 2558669489 | DRAFT_00157 | Product_name   |               | hypothetical protein                              |          |
| 2558669489 | DRAFT_00157 | Scaffold       |               | DRAFT_contig_70_6_len_107089_read_count_1768889.2 |          |
| 2558669489 | DRAFT_00157 | Coordinates    |               | 20087..20953(-)                                   |          |
| 2558669489 | DRAFT_00157 | DNA_length     |               | 867bp                                             |          |
| 2558669489 | DRAFT_00157 | Protein_length |               | 288aa                                             |          |
| 2558669489 | DRAFT_00157 | GC             |               |                                                   | 0.51     |
| 2558669489 | DRAFT_00157 | Transmembrane  |               | Yes                                               |          |
| 2558669490 | DRAFT_00158 | Locus_type     |               | CDS                                               |          |
| 2558669490 | DRAFT_00158 | Product_name   |               | hypothetical protein                              |          |
| 2558669490 | DRAFT_00158 | Scaffold       |               | DRAFT_contig_70_6_len_107089_read_count_1768889.2 |          |
| 2558669490 | DRAFT_00158 | Coordinates    |               | 20972..21142(-)                                   |          |
| 2558669490 | DRAFT_00158 | DNA_length     |               | 171bp                                             |          |

|            |             |                |                                                              |          |
|------------|-------------|----------------|--------------------------------------------------------------|----------|
| 2558669490 | DRAFT_00158 | Protein_length | 56aa                                                         |          |
| 2558669490 | DRAFT_00158 | GC             |                                                              | 0.52     |
| 2558669491 | DRAFT_00159 | COG_category   | [L] Replication, recombination and repair                    |          |
| 2558669491 | DRAFT_00159 | COG3316        | Transposase and inactivated derivatives                      | 1.00E-11 |
| 2558669491 | DRAFT_00159 | pfam13610      | DDE_Tnp_IS240                                                | 9.80E-20 |
| 2558669491 | DRAFT_00159 | pfam04434      | SWIM                                                         | 3.50E-06 |
| 2558669491 | DRAFT_00159 | Locus_type     | CDS                                                          |          |
| 2558669491 | DRAFT_00159 | Product_name   | Transposase and inactivated derivatives                      |          |
| 2558669491 | DRAFT_00159 | Scaffold       | DRAFT_contig_70_6_len_107089_read_count_1768889.2            |          |
| 2558669491 | DRAFT_00159 | Coordinates    | 21211..22365(+)                                              |          |
| 2558669491 | DRAFT_00159 | DNA_length     | 1155bp                                                       |          |
| 2558669491 | DRAFT_00159 | Protein_length | 384aa                                                        |          |
| 2558669491 | DRAFT_00159 | GC             |                                                              | 0.57     |
| 2558669492 | DRAFT_00160 | COG_category   | [R] General function prediction only                         |          |
| 2558669492 | DRAFT_00160 | COG0456        | Acetyltransferases                                           | 2.00E-16 |
| 2558669492 | DRAFT_00160 | pfam00583      | Acetyltransf_1                                               | 4.70E-16 |
| 2558669492 | DRAFT_00160 | EC:2.3.1.128   | Ribosomal-protein-alanine N-acetyltransferase.               |          |
| 2558669492 | DRAFT_00160 | TIGR01575      | ribosomal-protein-alanine acetyltransferase                  | 9.90E-28 |
| 2558669492 | DRAFT_00160 | KO:K03789      | ribosomal-protein-alanine N-acetyltransferase [EC:2.3.1.128] | 0.00E+00 |
| 2558669492 | DRAFT_00160 | Locus_type     | CDS                                                          |          |
| 2558669492 | DRAFT_00160 | Product_name   | Acetyltransferases                                           |          |
| 2558669492 | DRAFT_00160 | Scaffold       | DRAFT_contig_70_6_len_107089_read_count_1768889.2            |          |
| 2558669492 | DRAFT_00160 | Coordinates    | 22436..22939(+)                                              |          |
| 2558669492 | DRAFT_00160 | DNA_length     | 504bp                                                        |          |
| 2558669492 | DRAFT_00160 | Protein_length | 167aa                                                        |          |
| 2558669492 | DRAFT_00160 | GC             |                                                              | 0.55     |
| 2558669493 | DRAFT_00161 | COG_category   | [L] Replication, recombination and repair                    |          |
| 2558669493 | DRAFT_00161 | COG1793        | ATP-dependent DNA ligase                                     | 3.00E-72 |
| 2558669493 | DRAFT_00161 | pfam01068      | DNA_ligase_A_M                                               | 6.00E-47 |
| 2558669493 | DRAFT_00161 | pfam04675      | DNA_ligase_A_N                                               | 3.50E-32 |
| 2558669493 | DRAFT_00161 | pfam04679      | DNA_ligase_A_C                                               | 2.50E-13 |

|            |             |                |                                                                                       |           |
|------------|-------------|----------------|---------------------------------------------------------------------------------------|-----------|
| 2558669493 | DRAFT_00161 | EC:6.5.1.1     | DNA ligase (ATP).                                                                     |           |
| 2558669493 | DRAFT_00161 | TIGR00574      | DNA ligase I, ATP-dependent (dnl1)                                                    | 4.40E-106 |
| 2558669493 | DRAFT_00161 | KO:K01971      | DNA ligase (ATP) [EC:6.5.1.1]                                                         | 0.00E+00  |
| 2558669493 | DRAFT_00161 | Locus_type     | CDS                                                                                   |           |
| 2558669493 | DRAFT_00161 | Product_name   | DNA ligase I, ATP-dependent (dnl1)                                                    |           |
| 2558669493 | DRAFT_00161 | Scaffold       | DRAFT_contig_70_6_len_107089_read_count_1768889.2                                     |           |
| 2558669493 | DRAFT_00161 | Coordinates    | 22936..24597(+)                                                                       |           |
| 2558669493 | DRAFT_00161 | DNA_length     | 1662bp                                                                                |           |
| 2558669493 | DRAFT_00161 | Protein_length | 553aa                                                                                 |           |
| 2558669493 | DRAFT_00161 | GC             |                                                                                       | 0.59      |
| 2558669494 | DRAFT_00162 | Locus_type     | CDS                                                                                   |           |
| 2558669494 | DRAFT_00162 | Product_name   | hypothetical protein                                                                  |           |
| 2558669494 | DRAFT_00162 | Scaffold       | DRAFT_contig_70_6_len_107089_read_count_1768889.2                                     |           |
| 2558669494 | DRAFT_00162 | Coordinates    | 24649..25254(+)                                                                       |           |
| 2558669494 | DRAFT_00162 | DNA_length     | 606bp                                                                                 |           |
| 2558669494 | DRAFT_00162 | Protein_length | 201aa                                                                                 |           |
| 2558669494 | DRAFT_00162 | GC             |                                                                                       | 0.58      |
| 2558669494 | DRAFT_00162 | Transmembrane  | Yes                                                                                   |           |
| 2558669495 | DRAFT_00163 | COG_category   | [F] Nucleotide transport and metabolism                                               |           |
| 2558669495 | DRAFT_00163 | COG0125        | Thymidylate kinase                                                                    | 2.00E-07  |
| 2558669495 | DRAFT_00163 | pfam02223      | Thymidylate_kin                                                                       | 7.00E-06  |
| 2558669495 | DRAFT_00163 | Locus_type     | CDS                                                                                   |           |
| 2558669495 | DRAFT_00163 | Product_name   | Thymidylate kinase                                                                    |           |
| 2558669495 | DRAFT_00163 | Scaffold       | DRAFT_contig_70_6_len_107089_read_count_1768889.2                                     |           |
| 2558669495 | DRAFT_00163 | Coordinates    | 25298..25885(+)                                                                       |           |
| 2558669495 | DRAFT_00163 | DNA_length     | 588bp                                                                                 |           |
| 2558669495 | DRAFT_00163 | Protein_length | 195aa                                                                                 |           |
| 2558669495 | DRAFT_00163 | GC             |                                                                                       | 0.53      |
| 2558669496 | DRAFT_00164 | KEGG_module    | M00131: Inositol phosphate metabolism, Ins(1,3,4,5)P4 => Ins(1,3,4)P3 => myo-inositol |           |
| 2558669496 | DRAFT_00164 | Metacyc        | PWY-4702: phytate degradation I                                                       |           |
| 2558669496 | DRAFT_00164 | Metacyc        | PWY-6363: D-<i>myo</i>-inositol (1,4,5)-trisphosphate degradation                     |           |

|            |             |                |                                                                        |          |
|------------|-------------|----------------|------------------------------------------------------------------------|----------|
| 2558669496 | DRAFT_00164 | Metacyc        | PWY-2301: <i>myo</i>-inositol biosynthesis                             |          |
| 2558669496 | DRAFT_00164 | IMG_pathway    | 527: Calvin cycle                                                      |          |
| 2558669496 | DRAFT_00164 | COG_category   | [G] Carbohydrate transport and metabolism                              |          |
| 2558669496 | DRAFT_00164 | COG0483        | Archaeal fructose-1,6-bisphosphatase and related enzymes of inositol r | 2.00E-40 |
| 2558669496 | DRAFT_00164 | pfam00459      | Inositol_P                                                             | 4.20E-35 |
| 2558669496 | DRAFT_00164 | EC:3.1.3.25    | Inositol-phosphate phosphatase.                                        |          |
| 2558669496 | DRAFT_00164 | KO:K01092      | myo-inositol-1(or 4)-monophosphatase [EC:3.1.3.25]                     | 2.00E-37 |
| 2558669496 | DRAFT_00164 | ITERM:03309    | D-fructose 1,6-bisphosphatase (EC 3.1.3.11)                            |          |
| 2558669496 | DRAFT_00164 | Locus_type     | CDS                                                                    |          |
| 2558669496 | DRAFT_00164 | Product_name   | D-fructose 1,6-bisphosphatase (EC 3.1.3.11)                            |          |
| 2558669496 | DRAFT_00164 | Scaffold       | DRAFT_contig_70_6_len_107089_read_count_1768889.2                      |          |
| 2558669496 | DRAFT_00164 | Coordinates    | 25885..26697(+)                                                        |          |
| 2558669496 | DRAFT_00164 | DNA_length     | 813bp                                                                  |          |
| 2558669496 | DRAFT_00164 | Protein_length | 270aa                                                                  |          |
| 2558669496 | DRAFT_00164 | GC             |                                                                        | 0.58     |
|            |             |                |                                                                        |          |
| 2558669497 | DRAFT_00165 | COG_category   | [R] General function prediction only                                   |          |
| 2558669497 | DRAFT_00165 | COG0546        | Predicted phosphatases                                                 | 9.00E-16 |
| 2558669497 | DRAFT_00165 | pfam13419      | HAD_2                                                                  | 1.50E-11 |
| 2558669497 | DRAFT_00165 | Locus_type     | CDS                                                                    |          |
| 2558669497 | DRAFT_00165 | Product_name   | Predicted phosphatases                                                 |          |
| 2558669497 | DRAFT_00165 | Scaffold       | DRAFT_contig_70_6_len_107089_read_count_1768889.2                      |          |
| 2558669497 | DRAFT_00165 | Coordinates    | 26675..27304(-)                                                        |          |
| 2558669497 | DRAFT_00165 | DNA_length     | 630bp                                                                  |          |
| 2558669497 | DRAFT_00165 | Protein_length | 209aa                                                                  |          |
| 2558669497 | DRAFT_00165 | GC             |                                                                        | 0.57     |
|            |             |                |                                                                        |          |
| 2558669498 | DRAFT_00166 | pfam13535      | ATP-grasp_4                                                            | 1.10E-23 |
| 2558669498 | DRAFT_00166 | Locus_type     | CDS                                                                    |          |
| 2558669498 | DRAFT_00166 | Product_name   | Biotin carboxylase                                                     |          |
| 2558669498 | DRAFT_00166 | Scaffold       | DRAFT_contig_70_6_len_107089_read_count_1768889.2                      |          |
| 2558669498 | DRAFT_00166 | Coordinates    | 27283..28377(-)                                                        |          |
| 2558669498 | DRAFT_00166 | DNA_length     | 1095bp                                                                 |          |
| 2558669498 | DRAFT_00166 | Protein_length | 364aa                                                                  |          |

|            |             |                |                                                       |          |
|------------|-------------|----------------|-------------------------------------------------------|----------|
| 2558669498 | DRAFT_00166 | GC             |                                                       | 0.58     |
| 2558669499 | DRAFT_00167 | Locus_type     | CDS                                                   |          |
| 2558669499 | DRAFT_00167 | Product_name   | hypothetical protein                                  |          |
| 2558669499 | DRAFT_00167 | Scaffold       | DRAFT_contig_70_6_len_107089_read_count_1768889.2     |          |
| 2558669499 | DRAFT_00167 | Coordinates    | 28374..29600(-)                                       |          |
| 2558669499 | DRAFT_00167 | DNA_length     | 1227bp                                                |          |
| 2558669499 | DRAFT_00167 | Protein_length | 408aa                                                 |          |
| 2558669499 | DRAFT_00167 | GC             |                                                       | 0.54     |
| 2558669500 | DRAFT_00168 | COG_category   | [F] Nucleotide transport and metabolism               |          |
| 2558669500 | DRAFT_00168 | COG0125        | Thymidylate kinase                                    | 2.00E-14 |
| 2558669500 | DRAFT_00168 | pfam02223      | Thymidylate_kin                                       | 2.00E-05 |
| 2558669500 | DRAFT_00168 | Locus_type     | CDS                                                   |          |
| 2558669500 | DRAFT_00168 | Product_name   | Thymidylate kinase                                    |          |
| 2558669500 | DRAFT_00168 | Scaffold       | DRAFT_contig_70_6_len_107089_read_count_1768889.2     |          |
| 2558669500 | DRAFT_00168 | Coordinates    | 29597..30544(-)                                       |          |
| 2558669500 | DRAFT_00168 | DNA_length     | 948bp                                                 |          |
| 2558669500 | DRAFT_00168 | Protein_length | 315aa                                                 |          |
| 2558669500 | DRAFT_00168 | GC             |                                                       | 0.52     |
| 2558669500 | DRAFT_00168 | Transmembrane  | Yes                                                   |          |
| 2558669501 | DRAFT_00169 | COG_category   | [M] Cell wall/membrane/envelope biogenesis            |          |
| 2558669501 | DRAFT_00169 | COG0463        | Glycosyltransferases involved in cell wall biogenesis | 5.00E-12 |
| 2558669501 | DRAFT_00169 | pfam00535      | Glycos_transf_2                                       | 2.80E-13 |
| 2558669501 | DRAFT_00169 | Locus_type     | CDS                                                   |          |
| 2558669501 | DRAFT_00169 | Product_name   | Glycosyltransferases involved in cell wall biogenesis |          |
| 2558669501 | DRAFT_00169 | Scaffold       | DRAFT_contig_70_6_len_107089_read_count_1768889.2     |          |
| 2558669501 | DRAFT_00169 | Coordinates    | 30606..31403(-)                                       |          |
| 2558669501 | DRAFT_00169 | DNA_length     | 798bp                                                 |          |
| 2558669501 | DRAFT_00169 | Protein_length | 265aa                                                 |          |
| 2558669501 | DRAFT_00169 | GC             |                                                       | 0.55     |
| 2558669502 | DRAFT_00170 | pfam00535      | Glycos_transf_2                                       | 2.90E-11 |



|            |             |                |                                                         |                                                                 |          |
|------------|-------------|----------------|---------------------------------------------------------|-----------------------------------------------------------------|----------|
| 2558669502 | DRAFT_00170 | Locus_type     |                                                         | CDS                                                             |          |
| 2558669502 | DRAFT_00170 | Product_name   |                                                         | Glycosyltransferases, probably involved in cell wall biogenesis |          |
| 2558669502 | DRAFT_00170 | Scaffold       |                                                         | DRAFT_contig_70_6_len_107089_read_count_1768889.2               |          |
| 2558669502 | DRAFT_00170 | Coordinates    |                                                         | 31550..32323(-)                                                 |          |
| 2558669502 | DRAFT_00170 | DNA_length     |                                                         | 774bp                                                           |          |
| 2558669502 | DRAFT_00170 | Protein_length |                                                         | 257aa                                                           |          |
| 2558669502 | DRAFT_00170 | GC             |                                                         |                                                                 | 0.55     |
| 2558669503 | DRAFT_00171 | Locus_type     |                                                         | CDS                                                             |          |
| 2558669503 | DRAFT_00171 | Product_name   |                                                         | hypothetical protein                                            |          |
| 2558669503 | DRAFT_00171 | Scaffold       |                                                         | DRAFT_contig_70_6_len_107089_read_count_1768889.2               |          |
| 2558669503 | DRAFT_00171 | Coordinates    |                                                         | 32576..33670(+)                                                 |          |
| 2558669503 | DRAFT_00171 | DNA_length     |                                                         | 1095bp                                                          |          |
| 2558669503 | DRAFT_00171 | Protein_length |                                                         | 364aa                                                           |          |
| 2558669503 | DRAFT_00171 | GC             |                                                         |                                                                 | 0.52     |
| 2558669503 | DRAFT_00171 | Transmembrane  |                                                         | Yes                                                             |          |
| 2558669504 | DRAFT_00172 | pfam13440      | Polysacc_synt_3                                         |                                                                 | 2.00E-09 |
| 2558669504 | DRAFT_00172 | Locus_type     |                                                         | CDS                                                             |          |
| 2558669504 | DRAFT_00172 | Product_name   |                                                         | Polysaccharide biosynthesis protein                             |          |
| 2558669504 | DRAFT_00172 | Scaffold       |                                                         | DRAFT_contig_70_6_len_107089_read_count_1768889.2               |          |
| 2558669504 | DRAFT_00172 | Coordinates    |                                                         | 33945..35534(+)                                                 |          |
| 2558669504 | DRAFT_00172 | DNA_length     |                                                         | 1590bp                                                          |          |
| 2558669504 | DRAFT_00172 | Protein_length |                                                         | 529aa                                                           |          |
| 2558669504 | DRAFT_00172 | GC             |                                                         |                                                                 | 0.58     |
| 2558669504 | DRAFT_00172 | Transmembrane  |                                                         | Yes                                                             |          |
| 2558669505 | DRAFT_00173 | COG_category   | [K] Transcription                                       |                                                                 |          |
| 2558669505 | DRAFT_00173 | COG5625        | Predicted transcription regulator containing HTH domain |                                                                 | 4.00E-05 |
| 2558669505 | DRAFT_00173 | Locus_type     |                                                         | CDS                                                             |          |
| 2558669505 | DRAFT_00173 | Product_name   |                                                         | hypothetical protein                                            |          |
| 2558669505 | DRAFT_00173 | Scaffold       |                                                         | DRAFT_contig_70_6_len_107089_read_count_1768889.2               |          |
| 2558669505 | DRAFT_00173 | Coordinates    |                                                         | 35674..35943(-)                                                 |          |
| 2558669505 | DRAFT_00173 | DNA_length     |                                                         | 270bp                                                           |          |

|            |             |                |                                                     |          |
|------------|-------------|----------------|-----------------------------------------------------|----------|
| 2558669505 | DRAFT_00173 | Protein_length | 89aa                                                |          |
| 2558669505 | DRAFT_00173 | GC             |                                                     | 0.59     |
| 2558669505 | DRAFT_00173 | Transmembrane  | Yes                                                 |          |
| 2558669506 | DRAFT_00174 | COG_category   | [J] Translation, ribosomal structure and biogenesis |          |
| 2558669506 | DRAFT_00174 | COG5256        | Translation elongation factor EF-1alpha (GTPase)    | 0.00E+00 |
| 2558669506 | DRAFT_00174 | pfam00009      | GTP_EFTU                                            | 6.20E-49 |
| 2558669506 | DRAFT_00174 | pfam03143      | GTP_EFTU_D3                                         | 8.60E-29 |
| 2558669506 | DRAFT_00174 | pfam03144      | GTP_EFTU_D2                                         | 1.30E-16 |
| 2558669506 | DRAFT_00174 | TIGR00483      | translation elongation factor EF-1 alpha            | 0.00E+00 |
| 2558669506 | DRAFT_00174 | TIGR00485      | translation elongation factor TU                    | 1.10E-66 |
| 2558669506 | DRAFT_00174 | KO:K03231      | elongation factor 1-alpha                           | 0.00E+00 |
| 2558669506 | DRAFT_00174 | Locus_type     | CDS                                                 |          |
| 2558669506 | DRAFT_00174 | Product_name   | translation elongation factor 1A (EF-1A/EF-Tu)      |          |
| 2558669506 | DRAFT_00174 | Scaffold       | DRAFT_contig_70_6_len_107089_read_count_1768889.2   |          |
| 2558669506 | DRAFT_00174 | Coordinates    | 36451..37776(-)                                     |          |
| 2558669506 | DRAFT_00174 | DNA_length     | 1326bp                                              |          |
| 2558669506 | DRAFT_00174 | Protein_length | 441aa                                               |          |
| 2558669506 | DRAFT_00174 | GC             |                                                     | 0.56     |
| 2558669507 | DRAFT_00175 | Locus_type     | CDS                                                 |          |
| 2558669507 | DRAFT_00175 | Product_name   | hypothetical protein                                |          |
| 2558669507 | DRAFT_00175 | Scaffold       | DRAFT_contig_70_6_len_107089_read_count_1768889.2   |          |
| 2558669507 | DRAFT_00175 | Coordinates    | 38042..38248(-)                                     |          |
| 2558669507 | DRAFT_00175 | DNA_length     | 207bp                                               |          |
| 2558669507 | DRAFT_00175 | Protein_length | 68aa                                                |          |
| 2558669507 | DRAFT_00175 | GC             |                                                     | 0.55     |
| 2558669507 | DRAFT_00175 | Transmembrane  | Yes                                                 |          |
| 2558669508 | DRAFT_00176 | Locus_type     | CDS                                                 |          |
| 2558669508 | DRAFT_00176 | Product_name   | hypothetical protein                                |          |
| 2558669508 | DRAFT_00176 | Scaffold       | DRAFT_contig_70_6_len_107089_read_count_1768889.2   |          |
| 2558669508 | DRAFT_00176 | Coordinates    | 38329..38502(-)                                     |          |
| 2558669508 | DRAFT_00176 | DNA_length     | 174bp                                               |          |

|            |             |                |                                                               |           |
|------------|-------------|----------------|---------------------------------------------------------------|-----------|
| 2558669508 | DRAFT_00176 | Protein_length | 57aa                                                          |           |
| 2558669508 | DRAFT_00176 | GC             |                                                               | 0.55      |
| 2558669508 | DRAFT_00176 | Transmembrane  | Yes                                                           |           |
| 2558669509 | DRAFT_00177 | Locus_type     | CDS                                                           |           |
| 2558669509 | DRAFT_00177 | Product_name   | hypothetical protein                                          |           |
| 2558669509 | DRAFT_00177 | Scaffold       | DRAFT_contig_70_6_len_107089_read_count_1768889.2             |           |
| 2558669509 | DRAFT_00177 | Coordinates    | 38687..38806(+)                                               |           |
| 2558669509 | DRAFT_00177 | DNA_length     | 120bp                                                         |           |
| 2558669509 | DRAFT_00177 | Protein_length | 39aa                                                          |           |
| 2558669509 | DRAFT_00177 | GC             |                                                               | 0.49      |
| 2558669509 | DRAFT_00177 | Transmembrane  | Yes                                                           |           |
| 2558669510 | DRAFT_00178 | KEGG_module    | M00050: Guanine ribonucleotide biosynthesis IMP => GDP,GTP    |           |
| 2558669510 | DRAFT_00178 | Metacyc        | PWY-5695: urate biosynthesis/inosine 5'-phosphate degradation |           |
| 2558669510 | DRAFT_00178 | Metacyc        | PWY-6125: guanosine nucleotides <i>de novo</i> biosynthesis   |           |
| 2558669510 | DRAFT_00178 | Metacyc        | PWY-6596: adenosine nucleotides degradation I                 |           |
| 2558669510 | DRAFT_00178 | Metacyc        | PWY-841: purine nucleotides <i>de novo</i> biosynthesis II    |           |
| 2558669510 | DRAFT_00178 | pfam00478      | IMPDH                                                         | 2.70E-96  |
| 2558669510 | DRAFT_00178 | EC:1.1.1.205   | IMP dehydrogenase.                                            |           |
| 2558669510 | DRAFT_00178 | KO:K00088      | IMP dehydrogenase [EC:1.1.1.205]                              | 0.00E+00  |
| 2558669510 | DRAFT_00178 | Locus_type     | CDS                                                           |           |
| 2558669510 | DRAFT_00178 | Product_name   | IMP dehydrogenase/GMP reductase                               |           |
| 2558669510 | DRAFT_00178 | Scaffold       | DRAFT_contig_70_6_len_107089_read_count_1768889.2             |           |
| 2558669510 | DRAFT_00178 | Coordinates    | 38917..40020(+)                                               |           |
| 2558669510 | DRAFT_00178 | DNA_length     | 1104bp                                                        |           |
| 2558669510 | DRAFT_00178 | Protein_length | 367aa                                                         |           |
| 2558669510 | DRAFT_00178 | GC             |                                                               | 0.6       |
| 2558669511 | DRAFT_00179 | KEGG_module    | M00050: Guanine ribonucleotide biosynthesis IMP => GDP,GTP    |           |
| 2558669511 | DRAFT_00179 | Metacyc        | PWY-6125: guanosine nucleotides <i>de novo</i> biosynthesis   |           |
| 2558669511 | DRAFT_00179 | Metacyc        | PWY-841: purine nucleotides <i>de novo</i> biosynthesis II    |           |
| 2558669511 | DRAFT_00179 | COG_category   | [F] Nucleotide transport and metabolism                       |           |
| 2558669511 | DRAFT_00179 | COG0519        | GMP synthase, PP-ATPase domain/subunit                        | 3.00E-119 |

|            |             |                |                                                                      |           |
|------------|-------------|----------------|----------------------------------------------------------------------|-----------|
| 2558669511 | DRAFT_00179 | pfam00958      | GMP_synt_C                                                           | 7.60E-27  |
| 2558669511 | DRAFT_00179 | pfam00733      | Asn_synthase                                                         | 9.20E-06  |
| 2558669511 | DRAFT_00179 | pfam00117      | GATase                                                               | 1.00E-35  |
| 2558669511 | DRAFT_00179 | EC:6.3.5.2     | GMP synthase (glutamine-hydrolyzing).                                |           |
| 2558669511 | DRAFT_00179 | TIGR00884      | GMP synthase (glutamine-hydrolyzing), C-terminal domain or B subunit | 2.00E-127 |
| 2558669511 | DRAFT_00179 | TIGR00888      | GMP synthase (glutamine-hydrolyzing), N-terminal domain or A subuni  | 3.10E-72  |
| 2558669511 | DRAFT_00179 | KO:K01951      | GMP synthase (glutamine-hydrolysing) [EC:6.3.5.2]                    | 0.00E+00  |
| 2558669511 | DRAFT_00179 | Locus_type     | CDS                                                                  |           |
| 2558669511 | DRAFT_00179 | Product_name   | GMP synthase (glutamine-hydrolyzing), C-terminal domain or B subur   |           |
| 2558669511 | DRAFT_00179 | Scaffold       | DRAFT_contig_70_6_len_107089_read_count_1768889.2                    |           |
| 2558669511 | DRAFT_00179 | Coordinates    | 40022..41569(+)                                                      |           |
| 2558669511 | DRAFT_00179 | DNA_length     | 1548bp                                                               |           |
| 2558669511 | DRAFT_00179 | Protein_length | 515aa                                                                |           |
| 2558669511 | DRAFT_00179 | GC             |                                                                      | 0.61      |
| 2558669511 | DRAFT_00179 | Fused_gene     | Yes                                                                  |           |
| 2558669512 | DRAFT_00180 | Metacyc        | PWY-6611: adenine and adenosine salvage V                            |           |
| 2558669512 | DRAFT_00180 | Metacyc        | PWY0-1296: purine ribonucleosides degradation                        |           |
| 2558669512 | DRAFT_00180 | Metacyc        | PWY-7179: purine deoxyribonucleosides degradation                    |           |
| 2558669512 | DRAFT_00180 | Metacyc        | PWY-6609: adenine and adenosine salvage III                          |           |
| 2558669512 | DRAFT_00180 | Metacyc        | SALVADEHYPOX-PWY: adenosine nucleotides degradation II               |           |
| 2558669512 | DRAFT_00180 | COG_category   | [F] Nucleotide transport and metabolism                              |           |
| 2558669512 | DRAFT_00180 | COG1816        | Adenosine deaminase                                                  | 2.00E-43  |
| 2558669512 | DRAFT_00180 | pfam00962      | A_deaminase                                                          | 6.80E-41  |
| 2558669512 | DRAFT_00180 | EC:3.5.4.4     | Adenosine deaminase.                                                 |           |
| 2558669512 | DRAFT_00180 | TIGR01430      | adenosine deaminase                                                  | 1.20E-60  |
| 2558669512 | DRAFT_00180 | KO:K01488      | adenosine deaminase [EC:3.5.4.4]                                     | 0.00E+00  |
| 2558669512 | DRAFT_00180 | Locus_type     | CDS                                                                  |           |
| 2558669512 | DRAFT_00180 | Product_name   | Adenosine deaminase                                                  |           |
| 2558669512 | DRAFT_00180 | Scaffold       | DRAFT_contig_70_6_len_107089_read_count_1768889.2                    |           |
| 2558669512 | DRAFT_00180 | Coordinates    | 41575..42558(+)                                                      |           |
| 2558669512 | DRAFT_00180 | DNA_length     | 984bp                                                                |           |
| 2558669512 | DRAFT_00180 | Protein_length | 327aa                                                                |           |
| 2558669512 | DRAFT_00180 | GC             |                                                                      | 0.57      |

|            |             |                |                                                     |                                                                       |          |
|------------|-------------|----------------|-----------------------------------------------------|-----------------------------------------------------------------------|----------|
| 2558669513 | DRAFT_00181 | pfam12697      | Abhydrolase_6                                       |                                                                       | 1.20E-13 |
| 2558669513 | DRAFT_00181 | Locus_type     |                                                     | CDS                                                                   |          |
| 2558669513 | DRAFT_00181 | Product_name   |                                                     | Predicted hydrolases or acyltransferases (alpha/beta hydrolase superi |          |
| 2558669513 | DRAFT_00181 | Scaffold       |                                                     | DRAFT_contig_70_6_len_107089_read_count_1768889.2                     |          |
| 2558669513 | DRAFT_00181 | Coordinates    |                                                     | 42629..43228(+)                                                       |          |
| 2558669513 | DRAFT_00181 | DNA_length     |                                                     | 600bp                                                                 |          |
| 2558669513 | DRAFT_00181 | Protein_length |                                                     | 199aa                                                                 |          |
| 2558669513 | DRAFT_00181 | GC             |                                                     |                                                                       | 0.61     |
| 2558669514 | DRAFT_00182 | Locus_type     |                                                     | CDS                                                                   |          |
| 2558669514 | DRAFT_00182 | Product_name   |                                                     | hypothetical protein                                                  |          |
| 2558669514 | DRAFT_00182 | Scaffold       |                                                     | DRAFT_contig_70_6_len_107089_read_count_1768889.2                     |          |
| 2558669514 | DRAFT_00182 | Coordinates    |                                                     | 43225..43344(+)                                                       |          |
| 2558669514 | DRAFT_00182 | DNA_length     |                                                     | 120bp                                                                 |          |
| 2558669514 | DRAFT_00182 | Protein_length |                                                     | 39aa                                                                  |          |
| 2558669514 | DRAFT_00182 | GC             |                                                     |                                                                       | 0.57     |
| 2558669515 | DRAFT_00183 | KEGG_module    | M00179: Ribosome, archaea                           |                                                                       |          |
| 2558669515 | DRAFT_00183 | KEGG_module    | M00178: Ribosome, bacteria                          |                                                                       |          |
| 2558669515 | DRAFT_00183 | COG_category   | [J] Translation, ribosomal structure and biogenesis |                                                                       |          |
| 2558669515 | DRAFT_00183 | COG0049        | Ribosomal protein S7                                |                                                                       | 3.00E-36 |
| 2558669515 | DRAFT_00183 | pfam00177      | Ribosomal_S7                                        |                                                                       | 5.00E-38 |
| 2558669515 | DRAFT_00183 | TIGR01028      | ribosomal protein S7(archaeal)/S5(eukaryotic)       |                                                                       | 6.40E-76 |
| 2558669515 | DRAFT_00183 | KO:K02992      | small subunit ribosomal protein S7                  |                                                                       | 0.00E+00 |
| 2558669515 | DRAFT_00183 | ITERM:01649    | SSU ribosomal protein S7P                           |                                                                       |          |
| 2558669515 | DRAFT_00183 | Locus_type     |                                                     | CDS                                                                   |          |
| 2558669515 | DRAFT_00183 | Product_name   |                                                     | SSU ribosomal protein S7P                                             |          |
| 2558669515 | DRAFT_00183 | Scaffold       |                                                     | DRAFT_contig_70_6_len_107089_read_count_1768889.2                     |          |
| 2558669515 | DRAFT_00183 | Coordinates    |                                                     | 43337..43948(-)                                                       |          |
| 2558669515 | DRAFT_00183 | DNA_length     |                                                     | 612bp                                                                 |          |
| 2558669515 | DRAFT_00183 | Protein_length |                                                     | 203aa                                                                 |          |
| 2558669515 | DRAFT_00183 | GC             |                                                     |                                                                       | 0.56     |

|            |             |                |                                                     |          |
|------------|-------------|----------------|-----------------------------------------------------|----------|
| 2558669516 | DRAFT_00184 | KEGG_module    | M00179: Ribosome, archaea                           |          |
| 2558669516 | DRAFT_00184 | KEGG_module    | M00178: Ribosome, bacteria                          |          |
| 2558669516 | DRAFT_00184 | COG_category   | [J] Translation, ribosomal structure and biogenesis |          |
| 2558669516 | DRAFT_00184 | COG0048        | Ribosomal protein S12                               | 4.00E-37 |
| 2558669516 | DRAFT_00184 | pfam00164      | Ribosom_S12_S23                                     | 4.10E-40 |
| 2558669516 | DRAFT_00184 | TIGR00982      | ribosomal protein S23 (S12)                         | 3.00E-76 |
| 2558669516 | DRAFT_00184 | KO:K02950      | small subunit ribosomal protein S12                 | 0.00E+00 |
| 2558669516 | DRAFT_00184 | Locus_type     | CDS                                                 |          |
| 2558669516 | DRAFT_00184 | Product_name   | SSU ribosomal protein S12P                          |          |
| 2558669516 | DRAFT_00184 | Scaffold       | DRAFT_contig_70_6_len_107089_read_count_1768889.2   |          |
| 2558669516 | DRAFT_00184 | Coordinates    | 43953..44390(-)                                     |          |
| 2558669516 | DRAFT_00184 | DNA_length     | 438bp                                               |          |
| 2558669516 | DRAFT_00184 | Protein_length | 145aa                                               |          |
| 2558669516 | DRAFT_00184 | GC             |                                                     | 0.59     |
| 2558669517 | DRAFT_00185 | pfam07650      | KH_2                                                | 1.90E-05 |
| 2558669517 | DRAFT_00185 | pfam07650      | KH_2                                                | 8.00E-14 |
| 2558669517 | DRAFT_00185 | TIGR01952      | NusA family KH domain protein, archaeal             | 6.00E-43 |
| 2558669517 | DRAFT_00185 | KO:K02600      | N utilization substance protein A                   | 5.70E-38 |
| 2558669517 | DRAFT_00185 | Locus_type     | CDS                                                 |          |
| 2558669517 | DRAFT_00185 | Product_name   | NusA family KH domain protein, archaeal             |          |
| 2558669517 | DRAFT_00185 | Scaffold       | DRAFT_contig_70_6_len_107089_read_count_1768889.2   |          |
| 2558669517 | DRAFT_00185 | Coordinates    | 44429..44836(-)                                     |          |
| 2558669517 | DRAFT_00185 | DNA_length     | 408bp                                               |          |
| 2558669517 | DRAFT_00185 | Protein_length | 135aa                                               |          |
| 2558669517 | DRAFT_00185 | GC             |                                                     | 0.6      |
| 2558669518 | DRAFT_00186 | KEGG_module    | M00177: Ribosome, eukaryotes                        |          |
| 2558669518 | DRAFT_00186 | KEGG_module    | M00179: Ribosome, archaea                           |          |
| 2558669518 | DRAFT_00186 | COG_category   | [J] Translation, ribosomal structure and biogenesis |          |
| 2558669518 | DRAFT_00186 | COG1911        | Ribosomal protein L30E                              | 3.00E-09 |
| 2558669518 | DRAFT_00186 | pfam01248      | Ribosomal_L7Ae                                      | 7.20E-09 |
| 2558669518 | DRAFT_00186 | KO:K02908      | large subunit ribosomal protein L30e                | 2.30E-12 |
| 2558669518 | DRAFT_00186 | Locus_type     | CDS                                                 |          |

|            |             |                |                                                                                 |           |
|------------|-------------|----------------|---------------------------------------------------------------------------------|-----------|
| 2558669518 | DRAFT_00186 | Product_name   | Ribosomal protein L30E                                                          |           |
| 2558669518 | DRAFT_00186 | Scaffold       | DRAFT_contig_70_6_len_107089_read_count_1768889.2                               |           |
| 2558669518 | DRAFT_00186 | Coordinates    | 44880..45182(-)                                                                 |           |
| 2558669518 | DRAFT_00186 | DNA_length     | 303bp                                                                           |           |
| 2558669518 | DRAFT_00186 | Protein_length | 100aa                                                                           |           |
| 2558669518 | DRAFT_00186 | GC             |                                                                                 | 0.6       |
| 2558669519 | DRAFT_00187 | KEGG_module    | M00184: RNA polymerase, archaea                                                 |           |
| 2558669519 | DRAFT_00187 | COG_category   | [K] Transcription                                                               |           |
| 2558669519 | DRAFT_00187 | COG0086        | DNA-directed RNA polymerase, beta' subunit/160 kD subunit                       | 0.00E+00  |
| 2558669519 | DRAFT_00187 | pfam04983      | RNA_pol_Rpb1_3                                                                  | 2.50E-34  |
| 2558669519 | DRAFT_00187 | pfam05000      | RNA_pol_Rpb1_4                                                                  | 6.20E-24  |
| 2558669519 | DRAFT_00187 | pfam04998      | RNA_pol_Rpb1_5                                                                  | 1.00E-86  |
| 2558669519 | DRAFT_00187 | pfam04997      | RNA_pol_Rpb1_1                                                                  | 3.20E-84  |
| 2558669519 | DRAFT_00187 | pfam00623      | RNA_pol_Rpb1_2                                                                  | 1.40E-66  |
| 2558669519 | DRAFT_00187 | EC:2.7.7.6     | DNA-directed RNA polymerase.                                                    |           |
| 2558669519 | DRAFT_00187 | TIGR02390      | DNA-directed RNA polymerase subunit A'                                          | 0.00E+00  |
| 2558669519 | DRAFT_00187 | TIGR02389      | DNA-directed RNA polymerase, subunit A''                                        | 0.00E+00  |
| 2558669519 | DRAFT_00187 | KO:K03041      | DNA-directed RNA polymerase subunit A' [EC:2.7.7.6]                             | 0.00E+00  |
| 2558669519 | DRAFT_00187 | Locus_type     | CDS                                                                             |           |
| 2558669519 | DRAFT_00187 | Product_name   | DNA-directed RNA polymerase, subunit A''/DNA-directed RNA polymerase subunit A' |           |
| 2558669519 | DRAFT_00187 | Scaffold       | DRAFT_contig_70_6_len_107089_read_count_1768889.2                               |           |
| 2558669519 | DRAFT_00187 | Coordinates    | 45188..48976(-)                                                                 |           |
| 2558669519 | DRAFT_00187 | DNA_length     | 3789bp                                                                          |           |
| 2558669519 | DRAFT_00187 | Protein_length | 1262aa                                                                          |           |
| 2558669519 | DRAFT_00187 | GC             |                                                                                 | 0.59      |
| 2558669519 | DRAFT_00187 | Fused_gene     | Yes                                                                             |           |
| 2558669520 | DRAFT_00188 | KEGG_module    | M00184: RNA polymerase, archaea                                                 |           |
| 2558669520 | DRAFT_00188 | COG_category   | [K] Transcription                                                               |           |
| 2558669520 | DRAFT_00188 | COG0085        | DNA-directed RNA polymerase, beta subunit/140 kD subunit                        | 0.00E+00  |
| 2558669520 | DRAFT_00188 | pfam04561      | RNA_pol_Rpb2_2                                                                  | 3.40E-23  |
| 2558669520 | DRAFT_00188 | pfam04565      | RNA_pol_Rpb2_3                                                                  | 2.30E-26  |
| 2558669520 | DRAFT_00188 | pfam00562      | RNA_pol_Rpb2_6                                                                  | 1.20E-119 |

|            |             |                |                                                     |          |
|------------|-------------|----------------|-----------------------------------------------------|----------|
| 2558669520 | DRAFT_00188 | pfam04563      | RNA_pol_Rpb2_1                                      | 2.50E-50 |
| 2558669520 | DRAFT_00188 | pfam04566      | RNA_pol_Rpb2_4                                      | 1.10E-10 |
| 2558669520 | DRAFT_00188 | pfam04560      | RNA_pol_Rpb2_7                                      | 2.60E-27 |
| 2558669520 | DRAFT_00188 | pfam04567      | RNA_pol_Rpb2_5                                      | 2.00E-10 |
| 2558669520 | DRAFT_00188 | EC:2.7.7.6     | DNA-directed RNA polymerase.                        |          |
| 2558669520 | DRAFT_00188 | TIGR03670      | DNA-directed RNA polymerase subunit B               | 0.00E+00 |
| 2558669520 | DRAFT_00188 | KO:K13798      | DNA-directed RNA polymerase subunit B [EC:2.7.7.6]  | 0.00E+00 |
| 2558669520 | DRAFT_00188 | Locus_type     | CDS                                                 |          |
| 2558669520 | DRAFT_00188 | Product_name   | DNA-directed RNA polymerase subunit B               |          |
| 2558669520 | DRAFT_00188 | Scaffold       | DRAFT_contig_70_6_len_107089_read_count_1768889.2   |          |
| 2558669520 | DRAFT_00188 | Coordinates    | 48981..52337(-)                                     |          |
| 2558669520 | DRAFT_00188 | DNA_length     | 3357bp                                              |          |
| 2558669520 | DRAFT_00188 | Protein_length | 1118aa                                              |          |
| 2558669520 | DRAFT_00188 | GC             |                                                     | 0.58     |
| 2558669520 | DRAFT_00188 | Fused_gene     | Yes                                                 |          |
| 2558669521 | DRAFT_00189 | KEGG_module    | M00184: RNA polymerase, archaea                     |          |
| 2558669521 | DRAFT_00189 | COG_category   | [K] Transcription                                   |          |
| 2558669521 | DRAFT_00189 | COG2012        | DNA-directed RNA polymerase, subunit H, RpoH/RPB5   | 5.00E-18 |
| 2558669521 | DRAFT_00189 | pfam01191      | RNA_pol_Rpb5_C                                      | 1.30E-27 |
| 2558669521 | DRAFT_00189 | EC:2.7.7.6     | DNA-directed RNA polymerase.                        |          |
| 2558669521 | DRAFT_00189 | KO:K03053      | DNA-directed RNA polymerase subunit H [EC:2.7.7.6]  | 1.20E-17 |
| 2558669521 | DRAFT_00189 | Locus_type     | CDS                                                 |          |
| 2558669521 | DRAFT_00189 | Product_name   | DNA-directed RNA polymerase, subunit H (EC 2.7.7.6) |          |
| 2558669521 | DRAFT_00189 | Scaffold       | DRAFT_contig_70_6_len_107089_read_count_1768889.2   |          |
| 2558669521 | DRAFT_00189 | Coordinates    | 52340..52606(-)                                     |          |
| 2558669521 | DRAFT_00189 | DNA_length     | 267bp                                               |          |
| 2558669521 | DRAFT_00189 | Protein_length | 88aa                                                |          |
| 2558669521 | DRAFT_00189 | GC             |                                                     | 0.55     |
| 2558669522 | DRAFT_00190 | Locus_type     | CDS                                                 |          |
| 2558669522 | DRAFT_00190 | Product_name   | hypothetical protein                                |          |
| 2558669522 | DRAFT_00190 | Scaffold       | DRAFT_contig_70_6_len_107089_read_count_1768889.2   |          |
| 2558669522 | DRAFT_00190 | Coordinates    | 52801..53004(-)                                     |          |



|            |             |                |                                           |                                                   |          |
|------------|-------------|----------------|-------------------------------------------|---------------------------------------------------|----------|
| 2558669522 | DRAFT_00190 | DNA_length     |                                           | 204bp                                             |          |
| 2558669522 | DRAFT_00190 | Protein_length |                                           | 67aa                                              |          |
| 2558669522 | DRAFT_00190 | GC             |                                           |                                                   | 0.5      |
| 2558669523 | DRAFT_00191 | Locus_type     |                                           | CDS                                               |          |
| 2558669523 | DRAFT_00191 | Product_name   |                                           | hypothetical protein                              |          |
| 2558669523 | DRAFT_00191 | Scaffold       |                                           | DRAFT_contig_70_6_len_107089_read_count_1768889.2 |          |
| 2558669523 | DRAFT_00191 | Coordinates    |                                           | 53200..53397(-)                                   |          |
| 2558669523 | DRAFT_00191 | DNA_length     |                                           | 198bp                                             |          |
| 2558669523 | DRAFT_00191 | Protein_length |                                           | 65aa                                              |          |
| 2558669523 | DRAFT_00191 | GC             |                                           |                                                   | 0.57     |
| 2558669524 | DRAFT_00192 | COG_category   | [L] Replication, recombination and repair |                                                   |          |
| 2558669524 | DRAFT_00192 | COG3316        | Transposase and inactivated derivatives   |                                                   | 8.00E-08 |
| 2558669524 | DRAFT_00192 | pfam04434      | SWIM                                      |                                                   | 6.70E-04 |
| 2558669524 | DRAFT_00192 | pfam13610      | DDE_Tnp_IS240                             |                                                   | 1.20E-20 |
| 2558669524 | DRAFT_00192 | Locus_type     |                                           | CDS                                               |          |
| 2558669524 | DRAFT_00192 | Product_name   |                                           | Transposase and inactivated derivatives           |          |
| 2558669524 | DRAFT_00192 | Scaffold       |                                           | DRAFT_contig_70_6_len_107089_read_count_1768889.2 |          |
| 2558669524 | DRAFT_00192 | Coordinates    |                                           | 53414..54568(-)                                   |          |
| 2558669524 | DRAFT_00192 | DNA_length     |                                           | 1155bp                                            |          |
| 2558669524 | DRAFT_00192 | Protein_length |                                           | 384aa                                             |          |
| 2558669524 | DRAFT_00192 | GC             |                                           |                                                   | 0.57     |
| 2558669525 | DRAFT_00193 | Locus_type     |                                           | CDS                                               |          |
| 2558669525 | DRAFT_00193 | Product_name   |                                           | hypothetical protein                              |          |
| 2558669525 | DRAFT_00193 | Scaffold       |                                           | DRAFT_contig_70_6_len_107089_read_count_1768889.2 |          |
| 2558669525 | DRAFT_00193 | Coordinates    |                                           | 54752..54928(+)                                   |          |
| 2558669525 | DRAFT_00193 | DNA_length     |                                           | 177bp                                             |          |
| 2558669525 | DRAFT_00193 | Protein_length |                                           | 58aa                                              |          |
| 2558669525 | DRAFT_00193 | GC             |                                           |                                                   | 0.59     |
| 2558669526 | DRAFT_00194 | pfam01420      | Methylase_S                               |                                                   | 1.70E-08 |
| 2558669526 | DRAFT_00194 | Locus_type     |                                           | CDS                                               |          |

|            |             |                |                                                                  |          |
|------------|-------------|----------------|------------------------------------------------------------------|----------|
| 2558669526 | DRAFT_00194 | Product_name   | Restriction endonuclease S subunits                              |          |
| 2558669526 | DRAFT_00194 | Scaffold       | DRAFT_contig_70_6_len_107089_read_count_1768889.2                |          |
| 2558669526 | DRAFT_00194 | Coordinates    | 54933..55610(-)                                                  |          |
| 2558669526 | DRAFT_00194 | DNA_length     | 678bp                                                            |          |
| 2558669526 | DRAFT_00194 | Protein_length | 225aa                                                            |          |
| 2558669526 | DRAFT_00194 | GC             |                                                                  | 0.52     |
|            |             |                |                                                                  |          |
| 2558669527 | DRAFT_00195 | COG_category   | [V] Defense mechanisms                                           |          |
| 2558669527 | DRAFT_00195 | COG0286        | Type I restriction-modification system methyltransferase subunit | 1.00E-23 |
| 2558669527 | DRAFT_00195 | pfam02384      | N6_Mtase                                                         | 7.10E-31 |
| 2558669527 | DRAFT_00195 | Locus_type     | CDS                                                              |          |
| 2558669527 | DRAFT_00195 | Product_name   | Type I restriction-modification system methyltransferase subunit |          |
| 2558669527 | DRAFT_00195 | Scaffold       | DRAFT_contig_70_6_len_107089_read_count_1768889.2                |          |
| 2558669527 | DRAFT_00195 | Coordinates    | 55634..57610(-)                                                  |          |
| 2558669527 | DRAFT_00195 | DNA_length     | 1977bp                                                           |          |
| 2558669527 | DRAFT_00195 | Protein_length | 658aa                                                            |          |
| 2558669527 | DRAFT_00195 | GC             |                                                                  | 0.54     |
|            |             |                |                                                                  |          |
| 2558669528 | DRAFT_00196 | pfam01096      | TFIIS_C                                                          | 2.10E-05 |
| 2558669528 | DRAFT_00196 | Locus_type     | CDS                                                              |          |
| 2558669528 | DRAFT_00196 | Product_name   | Transcription factor S-II (TFIIS)                                |          |
| 2558669528 | DRAFT_00196 | Scaffold       | DRAFT_contig_70_6_len_107089_read_count_1768889.2                |          |
| 2558669528 | DRAFT_00196 | Coordinates    | 57914..58048(+)                                                  |          |
| 2558669528 | DRAFT_00196 | DNA_length     | 135bp                                                            |          |
| 2558669528 | DRAFT_00196 | Protein_length | 44aa                                                             |          |
| 2558669528 | DRAFT_00196 | GC             |                                                                  | 0.53     |
|            |             |                |                                                                  |          |
| 2558669529 | DRAFT_00197 | Locus_type     | CDS                                                              |          |
| 2558669529 | DRAFT_00197 | Product_name   | hypothetical protein                                             |          |
| 2558669529 | DRAFT_00197 | Scaffold       | DRAFT_contig_70_6_len_107089_read_count_1768889.2                |          |
| 2558669529 | DRAFT_00197 | Coordinates    | 58206..58502(+)                                                  |          |
| 2558669529 | DRAFT_00197 | DNA_length     | 297bp                                                            |          |
| 2558669529 | DRAFT_00197 | Protein_length | 98aa                                                             |          |
| 2558669529 | DRAFT_00197 | GC             |                                                                  | 0.55     |

|            |             |                |                                                              |          |
|------------|-------------|----------------|--------------------------------------------------------------|----------|
| 2558669530 | DRAFT_00198 | COG_category   | [P] Inorganic ion transport and metabolism                   |          |
| 2558669530 | DRAFT_00198 | COG2156        | K+-transporting ATPase, c chain                              | 3.00E-22 |
| 2558669530 | DRAFT_00198 | pfam02669      | KdpC                                                         | 6.40E-08 |
| 2558669530 | DRAFT_00198 | pfam02669      | KdpC                                                         | 7.30E-14 |
| 2558669530 | DRAFT_00198 | EC:3.6.3.12    | Potassium-transporting ATPase.                               |          |
| 2558669530 | DRAFT_00198 | KO:K01548      | K+-transporting ATPase ATPase C chain [EC:3.6.3.12]          | 5.20E-16 |
| 2558669530 | DRAFT_00198 | Locus_type     | CDS                                                          |          |
| 2558669530 | DRAFT_00198 | Product_name   | K+-transporting ATPase, c chain                              |          |
| 2558669530 | DRAFT_00198 | Scaffold       | DRAFT_contig_70_6_len_107089_read_count_1768889.2            |          |
| 2558669530 | DRAFT_00198 | Coordinates    | 58525..58977(-)                                              |          |
| 2558669530 | DRAFT_00198 | DNA_length     | 453bp                                                        |          |
| 2558669530 | DRAFT_00198 | Protein_length | 150aa                                                        |          |
| 2558669530 | DRAFT_00198 | GC             |                                                              | 0.51     |
| 2558669530 | DRAFT_00198 | Transmembrane  | Yes                                                          |          |
| 2558669531 | DRAFT_00199 | COG_category   | [P] Inorganic ion transport and metabolism                   |          |
| 2558669531 | DRAFT_00199 | COG2216        | High-affinity K+ transport system, ATPase chain B            | 0.00E+00 |
| 2558669531 | DRAFT_00199 | pfam00702      | Hydrolase                                                    | 1.20E-27 |
| 2558669531 | DRAFT_00199 | pfam00122      | E1-E2_ATPase                                                 | 2.00E-33 |
| 2558669531 | DRAFT_00199 | EC:3.6.3.12    | Potassium-transporting ATPase.                               |          |
| 2558669531 | DRAFT_00199 | TIGR01494      | ATPase, P-type (transporting), HAD superfamily, subfamily IC | 4.60E-36 |
| 2558669531 | DRAFT_00199 | KO:K01547      | K+-transporting ATPase ATPase B chain [EC:3.6.3.12]          | 0.00E+00 |
| 2558669531 | DRAFT_00199 | Locus_type     | CDS                                                          |          |
| 2558669531 | DRAFT_00199 | Product_name   | ATPase, P-type (transporting), HAD superfamily, subfamily IC |          |
| 2558669531 | DRAFT_00199 | Scaffold       | DRAFT_contig_70_6_len_107089_read_count_1768889.2            |          |
| 2558669531 | DRAFT_00199 | Coordinates    | 58987..61143(-)                                              |          |
| 2558669531 | DRAFT_00199 | DNA_length     | 2157bp                                                       |          |
| 2558669531 | DRAFT_00199 | Protein_length | 718aa                                                        |          |
| 2558669531 | DRAFT_00199 | GC             |                                                              | 0.58     |
| 2558669531 | DRAFT_00199 | Transmembrane  | Yes                                                          |          |
| 2558669532 | DRAFT_00200 | COG_category   | [P] Inorganic ion transport and metabolism                   |          |
| 2558669532 | DRAFT_00200 | COG2060        | K+-transporting ATPase, A chain                              | 0.00E+00 |

|            |             |                |                                                                 |          |
|------------|-------------|----------------|-----------------------------------------------------------------|----------|
| 2558669532 | DRAFT_00200 | pfam03814      | KdpA                                                            | 0.00E+00 |
| 2558669532 | DRAFT_00200 | EC:3.6.3.12    | Potassium-transporting ATPase.                                  |          |
| 2558669532 | DRAFT_00200 | TIGR00680      | K+-transporting ATPase, KdpA                                    | 0.00E+00 |
| 2558669532 | DRAFT_00200 | KO:K01546      | K+-transporting ATPase ATPase A chain [EC:3.6.3.12]             | 0.00E+00 |
| 2558669532 | DRAFT_00200 | Locus_type     | CDS                                                             |          |
| 2558669532 | DRAFT_00200 | Product_name   | K+-transporting ATPase, KdpA                                    |          |
| 2558669532 | DRAFT_00200 | Scaffold       | DRAFT_contig_70_6_len_107089_read_count_1768889.2               |          |
| 2558669532 | DRAFT_00200 | Coordinates    | 61130..62785(-)                                                 |          |
| 2558669532 | DRAFT_00200 | DNA_length     | 1656bp                                                          |          |
| 2558669532 | DRAFT_00200 | Protein_length | 551aa                                                           |          |
| 2558669532 | DRAFT_00200 | GC             |                                                                 | 0.58     |
| 2558669532 | DRAFT_00200 | Transmembrane  | Yes                                                             |          |
| 2558669533 | DRAFT_00201 | pfam01037      | AsnC_trans_reg                                                  | 4.60E-15 |
| 2558669533 | DRAFT_00201 | Locus_type     | CDS                                                             |          |
| 2558669533 | DRAFT_00201 | Product_name   | Transcriptional regulators                                      |          |
| 2558669533 | DRAFT_00201 | Scaffold       | DRAFT_contig_70_6_len_107089_read_count_1768889.2               |          |
| 2558669533 | DRAFT_00201 | Coordinates    | 62848..63141(-)                                                 |          |
| 2558669533 | DRAFT_00201 | DNA_length     | 294bp                                                           |          |
| 2558669533 | DRAFT_00201 | Protein_length | 97aa                                                            |          |
| 2558669533 | DRAFT_00201 | GC             |                                                                 | 0.54     |
| 2558669534 | DRAFT_00202 | Locus_type     | tRNA                                                            |          |
| 2558669534 | DRAFT_00202 | Product_name   | tRNA_Leu_TAG                                                    |          |
| 2558669534 | DRAFT_00202 | Scaffold       | DRAFT_contig_70_6_len_107089_read_count_1768889.2               |          |
| 2558669534 | DRAFT_00202 | Coordinates    | 63434..63521(+)                                                 |          |
| 2558669534 | DRAFT_00202 | DNA_length     | 88bp                                                            |          |
| 2558669534 | DRAFT_00202 | GC             |                                                                 | 0.7      |
| 2558669535 | DRAFT_00203 | COG_category   | [M] Cell wall/membrane/envelope biogenesis                      |          |
| 2558669535 | DRAFT_00203 | COG1215        | Glycosyltransferases, probably involved in cell wall biogenesis | 5.00E-33 |
| 2558669535 | DRAFT_00203 | pfam13641      | Glyco_tranf_2_3                                                 | 5.10E-28 |
| 2558669535 | DRAFT_00203 | Locus_type     | CDS                                                             |          |
| 2558669535 | DRAFT_00203 | Product_name   | Glycosyltransferases, probably involved in cell wall biogenesis |          |

|            |             |                |                                                                      |          |
|------------|-------------|----------------|----------------------------------------------------------------------|----------|
| 2558669535 | DRAFT_00203 | Scaffold       | DRAFT_contig_70_6_len_107089_read_count_1768889.2                    |          |
| 2558669535 | DRAFT_00203 | Coordinates    | 63588..65114(+)                                                      |          |
| 2558669535 | DRAFT_00203 | DNA_length     | 1527bp                                                               |          |
| 2558669535 | DRAFT_00203 | Protein_length | 508aa                                                                |          |
| 2558669535 | DRAFT_00203 | GC             |                                                                      | 0.56     |
| 2558669535 | DRAFT_00203 | Transmembrane  | Yes                                                                  |          |
| 2558669536 | DRAFT_00204 | KEGG_module    | M00362: Nucleotide sugar biosynthesis, prokaryotes                   |          |
| 2558669536 | DRAFT_00204 | KEGG_module    | M00361: Nucleotide sugar biosynthesis, eukaryotes                    |          |
| 2558669536 | DRAFT_00204 | Metacyc        | PWY-6527: stachyose degradation                                      |          |
| 2558669536 | DRAFT_00204 | Metacyc        | PWY-3821: galactose degradation III                                  |          |
| 2558669536 | DRAFT_00204 | Metacyc        | COLANSYN-PWY: colanic acid building blocks biosynthesis              |          |
| 2558669536 | DRAFT_00204 | Metacyc        | PWY-6397: mycolyl-arabinogalactan-peptidoglycan complex biosynthesis |          |
| 2558669536 | DRAFT_00204 | Metacyc        | PWY-6317: galactose degradation I (Leloir pathway)                   |          |
| 2558669536 | DRAFT_00204 | COG_category   | [M] Cell wall/membrane/envelope biogenesis                           |          |
| 2558669536 | DRAFT_00204 | COG_category   | [G] Carbohydrate transport and metabolism                            |          |
| 2558669536 | DRAFT_00204 | COG0451        | Nucleoside-diphosphate-sugar epimerases                              | 2.00E-39 |
| 2558669536 | DRAFT_00204 | pfam01370      | Epimerase                                                            | 2.90E-37 |
| 2558669536 | DRAFT_00204 | EC:5.1.3.2     | UDP-glucose 4-epimerase.                                             |          |
| 2558669536 | DRAFT_00204 | KO:K01784      | UDP-glucose 4-epimerase [EC:5.1.3.2]                                 | 0.00E+00 |
| 2558669536 | DRAFT_00204 | Locus_type     | CDS                                                                  |          |
| 2558669536 | DRAFT_00204 | Product_name   | Nucleoside-diphosphate-sugar epimerases                              |          |
| 2558669536 | DRAFT_00204 | Scaffold       | DRAFT_contig_70_6_len_107089_read_count_1768889.2                    |          |
| 2558669536 | DRAFT_00204 | Coordinates    | 65368..66351(-)                                                      |          |
| 2558669536 | DRAFT_00204 | DNA_length     | 984bp                                                                |          |
| 2558669536 | DRAFT_00204 | Protein_length | 327aa                                                                |          |
| 2558669536 | DRAFT_00204 | GC             |                                                                      | 0.53     |
| 2558669537 | DRAFT_00205 | KEGG_module    | M00362: Nucleotide sugar biosynthesis, prokaryotes                   |          |
| 2558669537 | DRAFT_00205 | KEGG_module    | M00361: Nucleotide sugar biosynthesis, eukaryotes                    |          |
| 2558669537 | DRAFT_00205 | Metacyc        | PWY-6317: galactose degradation I (Leloir pathway)                   |          |
| 2558669537 | DRAFT_00205 | Metacyc        | COLANSYN-PWY: colanic acid building blocks biosynthesis              |          |
| 2558669537 | DRAFT_00205 | Metacyc        | PWY-3821: galactose degradation III                                  |          |
| 2558669537 | DRAFT_00205 | Metacyc        | PWY-6397: mycolyl-arabinogalactan-peptidoglycan complex biosynthesis |          |

|            |             |                |                                                                                  |          |
|------------|-------------|----------------|----------------------------------------------------------------------------------|----------|
| 2558669537 | DRAFT_00205 | Metacyc        | PWY-6527: stachyose degradation                                                  |          |
| 2558669537 | DRAFT_00205 | COG_category   | [M] Cell wall/membrane/envelope biogenesis                                       |          |
| 2558669537 | DRAFT_00205 | COG_category   | [G] Carbohydrate transport and metabolism                                        |          |
| 2558669537 | DRAFT_00205 | COG0451        | Nucleoside-diphosphate-sugar epimerases                                          | 1.00E-48 |
| 2558669537 | DRAFT_00205 | pfam01370      | Epimerase                                                                        | 7.50E-41 |
| 2558669537 | DRAFT_00205 | EC:5.1.3.2     | UDP-glucose 4-epimerase.                                                         |          |
| 2558669537 | DRAFT_00205 | KO:K01784      | UDP-glucose 4-epimerase [EC:5.1.3.2]                                             | 0.00E+00 |
| 2558669537 | DRAFT_00205 | Locus_type     | CDS                                                                              |          |
| 2558669537 | DRAFT_00205 | Product_name   | Nucleoside-diphosphate-sugar epimerases                                          |          |
| 2558669537 | DRAFT_00205 | Scaffold       | DRAFT_contig_70_6_len_107089_read_count_1768889.2                                |          |
| 2558669537 | DRAFT_00205 | Coordinates    | 66375..67328(-)                                                                  |          |
| 2558669537 | DRAFT_00205 | DNA_length     | 954bp                                                                            |          |
| 2558669537 | DRAFT_00205 | Protein_length | 317aa                                                                            |          |
| 2558669537 | DRAFT_00205 | GC             |                                                                                  | 0.56     |
| 2558669538 | DRAFT_00206 | KEGG_module    | M00007: Pentose phosphate pathway, non-oxidative phase, fructose 6P => ribose 5P |          |
| 2558669538 | DRAFT_00206 | KEGG_module    | M00004: Pentose phosphate pathway (Pentose phosphate cycle)                      |          |
| 2558669538 | DRAFT_00206 | Metacyc        | PWY-5723: Rubisco shunt                                                          |          |
| 2558669538 | DRAFT_00206 | Metacyc        | NONOXIPENT-PWY: pentose phosphate pathway (non-oxidative branch)                 |          |
| 2558669538 | DRAFT_00206 | Metacyc        | P124-PWY: Bifidobacterium shunt                                                  |          |
| 2558669538 | DRAFT_00206 | Metacyc        | PWY-1861: formaldehyde assimilation II (RuMP Cycle)                              |          |
| 2558669538 | DRAFT_00206 | Metacyc        | P185-PWY: formaldehyde assimilation III (dihydroxyacetone cycle)                 |          |
| 2558669538 | DRAFT_00206 | COG_category   | [G] Carbohydrate transport and metabolism                                        |          |
| 2558669538 | DRAFT_00206 | COG0176        | Transaldolase                                                                    | 5.00E-37 |
| 2558669538 | DRAFT_00206 | pfam00923      | Transaldolase                                                                    | 4.00E-36 |
| 2558669538 | DRAFT_00206 | EC:2.2.1.2     | Transaldolase.                                                                   |          |
| 2558669538 | DRAFT_00206 | TIGR00875      | fructose-6-phosphate aldolase, TalC/MipB family                                  | 3.80E-54 |
| 2558669538 | DRAFT_00206 | KO:K00616      | transaldolase [EC:2.2.1.2]                                                       | 4.60E-42 |
| 2558669538 | DRAFT_00206 | Locus_type     | CDS                                                                              |          |
| 2558669538 | DRAFT_00206 | Product_name   | Transaldolase                                                                    |          |
| 2558669538 | DRAFT_00206 | Scaffold       | DRAFT_contig_70_6_len_107089_read_count_1768889.2                                |          |
| 2558669538 | DRAFT_00206 | Coordinates    | 67472..68182(-)                                                                  |          |
| 2558669538 | DRAFT_00206 | DNA_length     | 711bp                                                                            |          |
| 2558669538 | DRAFT_00206 | Protein_length | 236aa                                                                            |          |

|            |             |                |                                                                            |          |
|------------|-------------|----------------|----------------------------------------------------------------------------|----------|
| 2558669538 | DRAFT_00206 | GC             |                                                                            | 0.53     |
| 2558669539 | DRAFT_00207 | KEGG_module    | M00064: ADP-L-glycero-D-manno-heptose biosynthesis                         |          |
| 2558669539 | DRAFT_00207 | Metacyc        | PWY0-1241: ADP-L-<i>glycero</i>-&beta;-D-<i>manno</i>-heptose biosynthesis |          |
| 2558669539 | DRAFT_00207 | Metacyc        | PWY-6478: GDP-D-<i>glycero</i>-&alpha;-D-<i>manno</i>-heptose biosynthesis |          |
| 2558669539 | DRAFT_00207 | COG_category   | [E] Amino acid transport and metabolism                                    |          |
| 2558669539 | DRAFT_00207 | COG0241        | Histidinol phosphatase and related phosphatases                            | 4.00E-30 |
| 2558669539 | DRAFT_00207 | pfam13242      | Hydrolase_like                                                             | 1.20E-10 |
| 2558669539 | DRAFT_00207 | EC:3.1.3.83    | D-glycero-alpha-D-manno-heptose-1,7-bisphosphate 7-phosphatase.            |          |
| 2558669539 | DRAFT_00207 | EC:3.1.3.82    | D-glycero-beta-D-manno-heptose 1,7-bisphosphate 7-phosphatase.             |          |
| 2558669539 | DRAFT_00207 | TIGR01656      | histidinol-phosphate phosphatase family domain                             | 4.90E-34 |
| 2558669539 | DRAFT_00207 | TIGR00213      | D,D-heptose 1,7-bisphosphate phosphatase                                   | 2.10E-36 |
| 2558669539 | DRAFT_00207 | TIGR01662      | HAD-superfamily hydrolase, subfamily IIIA                                  | 4.90E-27 |
| 2558669539 | DRAFT_00207 | KO:K03273      | D-glycero-D-manno-heptose 1,7-bisphosphate phosphatase [EC:3.1.3.8         | 1.00E-32 |
| 2558669539 | DRAFT_00207 | Locus_type     | CDS                                                                        |          |
| 2558669539 | DRAFT_00207 | Product_name   | histidinol-phosphate phosphatase family domain/HAD-superfamily hy          |          |
| 2558669539 | DRAFT_00207 | Scaffold       | DRAFT_contig_70_6_len_107089_read_count_1768889.2                          |          |
| 2558669539 | DRAFT_00207 | Coordinates    | 68294..69058(+)                                                            |          |
| 2558669539 | DRAFT_00207 | DNA_length     | 765bp                                                                      |          |
| 2558669539 | DRAFT_00207 | Protein_length | 254aa                                                                      |          |
| 2558669539 | DRAFT_00207 | GC             |                                                                            | 0.55     |
| 2558669540 | DRAFT_00208 | KEGG_module    | M00064: ADP-L-glycero-D-manno-heptose biosynthesis                         |          |
| 2558669540 | DRAFT_00208 | Metacyc        | PWY0-1241: ADP-L-<i>glycero</i>-&beta;-D-<i>manno</i>-heptose biosynthesis |          |
| 2558669540 | DRAFT_00208 | Metacyc        | PWY-6478: GDP-D-<i>glycero</i>-&alpha;-D-<i>manno</i>-heptose biosynthesis |          |
| 2558669540 | DRAFT_00208 | COG_category   | [G] Carbohydrate transport and metabolism                                  |          |
| 2558669540 | DRAFT_00208 | COG0279        | Phosphoheptose isomerase                                                   | 5.00E-26 |
| 2558669540 | DRAFT_00208 | pfam13580      | SIS_2                                                                      | 5.20E-20 |
| 2558669540 | DRAFT_00208 | EC:5.3.1.28    | D-sedoheptulose 7-phosphate isomerase.                                     |          |
| 2558669540 | DRAFT_00208 | KO:K03271      | D-sedoheptulose 7-phosphate isomerase [EC:5.3.1.28]                        | 0.00E+00 |
| 2558669540 | DRAFT_00208 | Locus_type     | CDS                                                                        |          |
| 2558669540 | DRAFT_00208 | Product_name   | Phosphoheptose isomerase                                                   |          |
| 2558669540 | DRAFT_00208 | Scaffold       | DRAFT_contig_70_6_len_107089_read_count_1768889.2                          |          |
| 2558669540 | DRAFT_00208 | Coordinates    | 69080..69667(-)                                                            |          |

|            |             |                |                                                                            |          |
|------------|-------------|----------------|----------------------------------------------------------------------------|----------|
| 2558669540 | DRAFT_00208 | DNA_length     | 588bp                                                                      |          |
| 2558669540 | DRAFT_00208 | Protein_length | 195aa                                                                      |          |
| 2558669540 | DRAFT_00208 | GC             |                                                                            | 0.55     |
| 2558669541 | DRAFT_00209 | Metacyc        | PWY-6478: GDP-D-<i>glycero</i>-&alpha;-D-<i>manno</i>-heptose biosynthesis |          |
| 2558669541 | DRAFT_00209 | COG_category   | [R] General function prediction only                                       |          |
| 2558669541 | DRAFT_00209 | COG2605        | Predicted kinase related to galactokinase and mevalonate kinase            | 7.00E-80 |
| 2558669541 | DRAFT_00209 | pfam00288      | GHMP_kinases_N                                                             | 5.60E-08 |
| 2558669541 | DRAFT_00209 | pfam08544      | GHMP_kinases_C                                                             | 3.20E-10 |
| 2558669541 | DRAFT_00209 | EC:2.7.1.168   | D-glycero-alpha-D-manno-heptose-7-phosphate kinase.                        |          |
| 2558669541 | DRAFT_00209 | KO:K07031      | D-glycero-alpha-D-manno-heptose-7-phosphate kinase [EC:2.7.1.168]          | 0.00E+00 |
| 2558669541 | DRAFT_00209 | Locus_type     | CDS                                                                        |          |
| 2558669541 | DRAFT_00209 | Product_name   | Predicted kinase related to galactokinase and mevalonate kinase            |          |
| 2558669541 | DRAFT_00209 | Scaffold       | DRAFT_contig_70_6_len_107089_read_count_1768889.2                          |          |
| 2558669541 | DRAFT_00209 | Coordinates    | 69768..70802(+)                                                            |          |
| 2558669541 | DRAFT_00209 | DNA_length     | 1035bp                                                                     |          |
| 2558669541 | DRAFT_00209 | Protein_length | 344aa                                                                      |          |
| 2558669541 | DRAFT_00209 | GC             |                                                                            | 0.55     |
| 2558669542 | DRAFT_00210 | pfam00483      | NTP_transferase                                                            | 6.10E-17 |
| 2558669542 | DRAFT_00210 | Locus_type     | CDS                                                                        |          |
| 2558669542 | DRAFT_00210 | Product_name   | Nucleoside-diphosphate-sugar pyrophosphorylase involved in lipopol         |          |
| 2558669542 | DRAFT_00210 | Scaffold       | DRAFT_contig_70_6_len_107089_read_count_1768889.2                          |          |
| 2558669542 | DRAFT_00210 | Coordinates    | 70838..71533(+)                                                            |          |
| 2558669542 | DRAFT_00210 | DNA_length     | 696bp                                                                      |          |
| 2558669542 | DRAFT_00210 | Protein_length | 231aa                                                                      |          |
| 2558669542 | DRAFT_00210 | GC             |                                                                            | 0.55     |
| 2558669543 | DRAFT_00211 | COG_category   | [C] Energy production and conversion                                       |          |
| 2558669543 | DRAFT_00211 | COG_category   | [G] Carbohydrate transport and metabolism                                  |          |
| 2558669543 | DRAFT_00211 | COG1819        | Glycosyl transferases, related to UDP-glucuronosyltransferase              | 5.00E-28 |
| 2558669543 | DRAFT_00211 | pfam04101      | Glyco_tran_28_C                                                            | 4.40E-11 |
| 2558669543 | DRAFT_00211 | pfam13528      | Glyco_trans_1_3                                                            | 3.50E-12 |
| 2558669543 | DRAFT_00211 | TIGR00661      | conserved hypothetical protein                                             | 3.40E-15 |



|            |             |                |                                                                |                                                               |          |
|------------|-------------|----------------|----------------------------------------------------------------|---------------------------------------------------------------|----------|
| 2558669543 | DRAFT_00211 | Locus_type     |                                                                | CDS                                                           |          |
| 2558669543 | DRAFT_00211 | Product_name   |                                                                | Glycosyl transferases, related to UDP-glucuronosyltransferase |          |
| 2558669543 | DRAFT_00211 | Scaffold       |                                                                | DRAFT_contig_70_6_len_107089_read_count_1768889.2             |          |
| 2558669543 | DRAFT_00211 | Coordinates    |                                                                | 71581..72753(-)                                               |          |
| 2558669543 | DRAFT_00211 | DNA_length     |                                                                | 1173bp                                                        |          |
| 2558669543 | DRAFT_00211 | Protein_length |                                                                | 390aa                                                         |          |
| 2558669543 | DRAFT_00211 | GC             |                                                                |                                                               | 0.55     |
| 2558669544 | DRAFT_00212 | pfam12773      | DZR                                                            |                                                               | 2.30E-09 |
| 2558669544 | DRAFT_00212 | Locus_type     |                                                                | CDS                                                           |          |
| 2558669544 | DRAFT_00212 | Product_name   |                                                                | Double zinc ribbon                                            |          |
| 2558669544 | DRAFT_00212 | Scaffold       |                                                                | DRAFT_contig_70_6_len_107089_read_count_1768889.2             |          |
| 2558669544 | DRAFT_00212 | Coordinates    |                                                                | 72856..74028(+)                                               |          |
| 2558669544 | DRAFT_00212 | DNA_length     |                                                                | 1173bp                                                        |          |
| 2558669544 | DRAFT_00212 | Protein_length |                                                                | 390aa                                                         |          |
| 2558669544 | DRAFT_00212 | GC             |                                                                |                                                               | 0.54     |
| 2558669545 | DRAFT_00213 | pfam14378      | PAP2_3                                                         |                                                               | 8.60E-14 |
| 2558669545 | DRAFT_00213 | Locus_type     |                                                                | CDS                                                           |          |
| 2558669545 | DRAFT_00213 | Product_name   |                                                                | PAP2 superfamily                                              |          |
| 2558669545 | DRAFT_00213 | Scaffold       |                                                                | DRAFT_contig_70_6_len_107089_read_count_1768889.2             |          |
| 2558669545 | DRAFT_00213 | Coordinates    |                                                                | 74203..75135(-)                                               |          |
| 2558669545 | DRAFT_00213 | DNA_length     |                                                                | 933bp                                                         |          |
| 2558669545 | DRAFT_00213 | Protein_length |                                                                | 310aa                                                         |          |
| 2558669545 | DRAFT_00213 | GC             |                                                                |                                                               | 0.55     |
| 2558669545 | DRAFT_00213 | Transmembrane  |                                                                | Yes                                                           |          |
| 2558669546 | DRAFT_00214 | KEGG_module    | M00368: Ethylene biosynthesis, methionine => ethylene          |                                                               |          |
| 2558669546 | DRAFT_00214 | KEGG_module    | M00034: Methionine salvage pathway                             |                                                               |          |
| 2558669546 | DRAFT_00214 | KEGG_module    | M00035: Methionine degradation                                 |                                                               |          |
| 2558669546 | DRAFT_00214 | Metacyc        | SAM-PWY: S-adenosyl-L-methionine biosynthesis                  |                                                               |          |
| 2558669546 | DRAFT_00214 | Metacyc        | ETHYL-PWY: ethylene biosynthesis I (plants)                    |                                                               |          |
| 2558669546 | DRAFT_00214 | Metacyc        | PWY-5041: <i>S</i> -adenosyl-L-methionine cycle II             |                                                               |          |
| 2558669546 | DRAFT_00214 | Metacyc        | PWY-5912: 2'-deoxymugineic acid phyto siderophore biosynthesis |                                                               |          |

|            |             |                |                                                                 |          |
|------------|-------------|----------------|-----------------------------------------------------------------|----------|
| 2558669546 | DRAFT_00214 | Metacyc        | METHIONINE-DEG1-PWY: methionine degradation I (to homocysteine) |          |
| 2558669546 | DRAFT_00214 | IMG_pathway    | 462: S-adenosylmethionine synthesis                             |          |
| 2558669546 | DRAFT_00214 | COG_category   | [H] Coenzyme transport and metabolism                           |          |
| 2558669546 | DRAFT_00214 | COG0192        | S-adenosylmethionine synthetase                                 | 0.00E+00 |
| 2558669546 | DRAFT_00214 | pfam00438      | S-AdoMet_synt_N                                                 | 1.00E-39 |
| 2558669546 | DRAFT_00214 | pfam02773      | S-AdoMet_synt_C                                                 | 1.20E-63 |
| 2558669546 | DRAFT_00214 | pfam02772      | S-AdoMet_synt_M                                                 | 6.90E-47 |
| 2558669546 | DRAFT_00214 | EC:2.5.1.6     | Methionine adenosyltransferase.                                 |          |
| 2558669546 | DRAFT_00214 | TIGR01034      | S-adenosylmethionine synthetase                                 | 0.00E+00 |
| 2558669546 | DRAFT_00214 | KO:K00789      | S-adenosylmethionine synthetase [EC:2.5.1.6]                    | 0.00E+00 |
| 2558669546 | DRAFT_00214 | ITERM:01673    | methionine adenosyltransferase (EC 2.5.1.6)                     |          |
| 2558669546 | DRAFT_00214 | Locus_type     | CDS                                                             |          |
| 2558669546 | DRAFT_00214 | Product_name   | methionine adenosyltransferase (EC 2.5.1.6)                     |          |
| 2558669546 | DRAFT_00214 | Scaffold       | DRAFT_contig_70_6_len_107089_read_count_1768889.2               |          |
| 2558669546 | DRAFT_00214 | Coordinates    | 75308..76465(-)                                                 |          |
| 2558669546 | DRAFT_00214 | DNA_length     | 1158bp                                                          |          |
| 2558669546 | DRAFT_00214 | Protein_length | 385aa                                                           |          |
| 2558669546 | DRAFT_00214 | GC             |                                                                 | 0.57     |
| 2558669547 | DRAFT_00215 | COG_category   | [K] Transcription                                               |          |
| 2558669547 | DRAFT_00215 | COG3620        | Predicted transcriptional regulator with C-terminal CBS domains | 3.00E-33 |
| 2558669547 | DRAFT_00215 | pfam00571      | CBS                                                             | 1.00E-08 |
| 2558669547 | DRAFT_00215 | pfam01381      | HTH_3                                                           | 7.20E-11 |
| 2558669547 | DRAFT_00215 | Locus_type     | CDS                                                             |          |
| 2558669547 | DRAFT_00215 | Product_name   | Predicted transcriptional regulator with C-terminal CBS domains |          |
| 2558669547 | DRAFT_00215 | Scaffold       | DRAFT_contig_70_6_len_107089_read_count_1768889.2               |          |
| 2558669547 | DRAFT_00215 | Coordinates    | 76737..77303(+)                                                 |          |
| 2558669547 | DRAFT_00215 | DNA_length     | 567bp                                                           |          |
| 2558669547 | DRAFT_00215 | Protein_length | 188aa                                                           |          |
| 2558669547 | DRAFT_00215 | GC             |                                                                 | 0.57     |
| 2558669548 | DRAFT_00216 | COG_category   | [S] Function unknown                                            |          |
| 2558669548 | DRAFT_00216 | COG4243        | Predicted membrane protein                                      | 2.00E-12 |
| 2558669548 | DRAFT_00216 | pfam07884      | VKOR                                                            | 4.10E-18 |

|            |             |                |                                                                   |          |
|------------|-------------|----------------|-------------------------------------------------------------------|----------|
| 2558669548 | DRAFT_00216 | Locus_type     | CDS                                                               |          |
| 2558669548 | DRAFT_00216 | Product_name   | Predicted membrane protein                                        |          |
| 2558669548 | DRAFT_00216 | Scaffold       | DRAFT_contig_70_6_len_107089_read_count_1768889.2                 |          |
| 2558669548 | DRAFT_00216 | Coordinates    | 77398..77886(-)                                                   |          |
| 2558669548 | DRAFT_00216 | DNA_length     | 489bp                                                             |          |
| 2558669548 | DRAFT_00216 | Protein_length | 162aa                                                             |          |
| 2558669548 | DRAFT_00216 | GC             |                                                                   | 0.5      |
| 2558669548 | DRAFT_00216 | Transmembrane  | Yes                                                               |          |
| 2558669549 | DRAFT_00217 | pfam06053      | DUF929                                                            | 2.20E-27 |
| 2558669549 | DRAFT_00217 | Locus_type     | CDS                                                               |          |
| 2558669549 | DRAFT_00217 | Product_name   | Domain of unknown function (DUF929)                               |          |
| 2558669549 | DRAFT_00217 | Scaffold       | DRAFT_contig_70_6_len_107089_read_count_1768889.2                 |          |
| 2558669549 | DRAFT_00217 | Coordinates    | 77887..78759(-)                                                   |          |
| 2558669549 | DRAFT_00217 | DNA_length     | 873bp                                                             |          |
| 2558669549 | DRAFT_00217 | Protein_length | 290aa                                                             |          |
| 2558669549 | DRAFT_00217 | GC             |                                                                   | 0.53     |
| 2558669549 | DRAFT_00217 | Transmembrane  | Yes                                                               |          |
| 2558669550 | DRAFT_00218 | COG_category   | [L] Replication, recombination and repair                         |          |
| 2558669550 | DRAFT_00218 | COG1111        | ERCC4-like helicases                                              | 0.00E+00 |
| 2558669550 | DRAFT_00218 | pfam00270      | DEAD                                                              | 1.10E-19 |
| 2558669550 | DRAFT_00218 | pfam00271      | Helicase_C                                                        | 5.90E-19 |
| 2558669550 | DRAFT_00218 | Locus_type     | CDS                                                               |          |
| 2558669550 | DRAFT_00218 | Product_name   | ERCC4-like helicases                                              |          |
| 2558669550 | DRAFT_00218 | Scaffold       | DRAFT_contig_70_6_len_107089_read_count_1768889.2                 |          |
| 2558669550 | DRAFT_00218 | Coordinates    | 78920..80470(+)                                                   |          |
| 2558669550 | DRAFT_00218 | DNA_length     | 1551bp                                                            |          |
| 2558669550 | DRAFT_00218 | Protein_length | 516aa                                                             |          |
| 2558669550 | DRAFT_00218 | GC             |                                                                   | 0.59     |
| 2558669551 | DRAFT_00219 | KEGG_module    | M00050: Guanine ribonucleotide biosynthesis IMP => GDP,GTP        |          |
| 2558669551 | DRAFT_00219 | KEGG_module    | M00049: Adenine ribonucleotide biosynthesis, IMP => ADP,ATP       |          |
| 2558669551 | DRAFT_00219 | KEGG_module    | M00001: Glycolysis (Embden-Meyerhof pathway), glucose => pyruvate |          |

|            |             |              |                                                                            |           |
|------------|-------------|--------------|----------------------------------------------------------------------------|-----------|
| 2558669551 | DRAFT_00219 | KEGG_module  | M00002: Glycolysis, core module involving three-carbon compounds           |           |
| 2558669551 | DRAFT_00219 | Metacyc      | PWY-6142: gluconeogenesis II (<i>Methanobacterium thermoautotrophicum</i>) |           |
| 2558669551 | DRAFT_00219 | Metacyc      | P341-PWY: glycolysis V (Pyrococcus)                                        |           |
| 2558669551 | DRAFT_00219 | Metacyc      | PWY-7003: glycerol degradation to butanol                                  |           |
| 2558669551 | DRAFT_00219 | Metacyc      | ANARESP1-PWY: respiration (anaerobic)                                      |           |
| 2558669551 | DRAFT_00219 | Metacyc      | NPGLUCAT-PWY: Entner-Doudoroff pathway II (non-phosphorylative)            |           |
| 2558669551 | DRAFT_00219 | Metacyc      | PWY-6886: 1-butanol autotrophic biosynthesis                               |           |
| 2558669551 | DRAFT_00219 | Metacyc      | ANAGLYCOLYSIS-PWY: glycolysis III (glucokinase)                            |           |
| 2558669551 | DRAFT_00219 | Metacyc      | PWY-5723: Rubisco shunt                                                    |           |
| 2558669551 | DRAFT_00219 | Metacyc      | PWY-1042: glycolysis IV (plant cytosol)                                    |           |
| 2558669551 | DRAFT_00219 | Metacyc      | P122-PWY: heterolactic fermentation                                        |           |
| 2558669551 | DRAFT_00219 | Metacyc      | PWY-6901: xylose degradation IV                                            |           |
| 2558669551 | DRAFT_00219 | Metacyc      | PWY-5484: glycolysis II (from fructose-6P)                                 |           |
| 2558669551 | DRAFT_00219 | Metacyc      | FERMENTATION-PWY: mixed acid fermentation                                  |           |
| 2558669551 | DRAFT_00219 | Metacyc      | PWY-2221: Entner-Doudoroff pathway III (semi-phosphorylative)              |           |
| 2558669551 | DRAFT_00219 | Metacyc      | GLYCOLYSIS: glycolysis I                                                   |           |
| 2558669551 | DRAFT_00219 | Metacyc      | P124-PWY: Bifidobacterium shunt                                            |           |
| 2558669551 | DRAFT_00219 | IMG_pathway  | 336: Standard Embden-Meyerhof pathway                                      |           |
| 2558669551 | DRAFT_00219 | IMG_pathway  | 337: Embden-Meyerhof pathway without bisphosphoglycerate                   |           |
| 2558669551 | DRAFT_00219 | IMG_pathway  | 358: Conversion of glyceraldehyde to pyruvate                              |           |
| 2558669551 | DRAFT_00219 | IMG_pathway  | 359: Conversion of glyceraldehyde-3-phosphate to pyruvate                  |           |
| 2558669551 | DRAFT_00219 | COG_category | [G] Carbohydrate transport and metabolism                                  |           |
| 2558669551 | DRAFT_00219 | COG0469      | Pyruvate kinase                                                            | 0.00E+00  |
| 2558669551 | DRAFT_00219 | pfam00224    | PK                                                                         | 5.50E-112 |
| 2558669551 | DRAFT_00219 | pfam02887    | PK_C                                                                       | 5.30E-29  |
| 2558669551 | DRAFT_00219 | EC:2.7.1.40  | Pyruvate kinase.                                                           |           |
| 2558669551 | DRAFT_00219 | TIGR01064    | pyruvate kinase                                                            | 0.00E+00  |
| 2558669551 | DRAFT_00219 | KO:K00873    | pyruvate kinase [EC:2.7.1.40]                                              | 0.00E+00  |
| 2558669551 | DRAFT_00219 | ITERM:01480  | pyruvate kinase (EC 2.7.1.40)                                              |           |
| 2558669551 | DRAFT_00219 | Locus_type   | CDS                                                                        |           |
| 2558669551 | DRAFT_00219 | Product_name | pyruvate kinase (EC 2.7.1.40)                                              |           |
| 2558669551 | DRAFT_00219 | Scaffold     | DRAFT_contig_70_6_len_107089_read_count_1768889.2                          |           |
| 2558669551 | DRAFT_00219 | Coordinates  | 80481..81887(-)                                                            |           |
| 2558669551 | DRAFT_00219 | DNA_length   | 1407bp                                                                     |           |

|            |             |                |                                                                     |          |
|------------|-------------|----------------|---------------------------------------------------------------------|----------|
| 2558669551 | DRAFT_00219 | Protein_length | 468aa                                                               |          |
| 2558669551 | DRAFT_00219 | GC             |                                                                     | 0.62     |
| 2558669552 | DRAFT_00220 | Locus_type     | CDS                                                                 |          |
| 2558669552 | DRAFT_00220 | Product_name   | hypothetical protein                                                |          |
| 2558669552 | DRAFT_00220 | Scaffold       | DRAFT_contig_70_6_len_107089_read_count_1768889.2                   |          |
| 2558669552 | DRAFT_00220 | Coordinates    | 81899..82069(+)                                                     |          |
| 2558669552 | DRAFT_00220 | DNA_length     | 171bp                                                               |          |
| 2558669552 | DRAFT_00220 | Protein_length | 56aa                                                                |          |
| 2558669552 | DRAFT_00220 | GC             |                                                                     | 0.51     |
| 2558669552 | DRAFT_00220 | Transmembrane  | Yes                                                                 |          |
| 2558669553 | DRAFT_00221 | KEGG_module    | M00254: ABC-2 type transport system                                 |          |
| 2558669553 | DRAFT_00221 | COG_category   | [V] Defense mechanisms                                              |          |
| 2558669553 | DRAFT_00221 | COG1131        | ABC-type multidrug transport system, ATPase component               | 3.00E-61 |
| 2558669553 | DRAFT_00221 | pfam00005      | ABC_tran                                                            | 2.00E-28 |
| 2558669553 | DRAFT_00221 | KO:K01990      | ABC-2 type transport system ATP-binding protein                     | 0.00E+00 |
| 2558669553 | DRAFT_00221 | Locus_type     | CDS                                                                 |          |
| 2558669553 | DRAFT_00221 | Product_name   | ABC-type multidrug transport system, ATPase component               |          |
| 2558669553 | DRAFT_00221 | Scaffold       | DRAFT_contig_70_6_len_107089_read_count_1768889.2                   |          |
| 2558669553 | DRAFT_00221 | Coordinates    | 82042..82980(+)                                                     |          |
| 2558669553 | DRAFT_00221 | DNA_length     | 939bp                                                               |          |
| 2558669553 | DRAFT_00221 | Protein_length | 312aa                                                               |          |
| 2558669553 | DRAFT_00221 | GC             |                                                                     | 0.57     |
| 2558669554 | DRAFT_00222 | KEGG_module    | M00254: ABC-2 type transport system                                 |          |
| 2558669554 | DRAFT_00222 | COG_category   | [R] General function prediction only                                |          |
| 2558669554 | DRAFT_00222 | COG1277        | ABC-type transport system involved in multi-copper enzyme maturatio | 1.00E-08 |
| 2558669554 | DRAFT_00222 | pfam12730      | ABC2_membrane_4                                                     | 2.30E-18 |
| 2558669554 | DRAFT_00222 | KO:K01992      | ABC-2 type transport system permease protein                        | 5.60E-45 |
| 2558669554 | DRAFT_00222 | Locus_type     | CDS                                                                 |          |
| 2558669554 | DRAFT_00222 | Product_name   | ABC-type transport system involved in multi-copper enzyme maturati  |          |
| 2558669554 | DRAFT_00222 | Scaffold       | DRAFT_contig_70_6_len_107089_read_count_1768889.2                   |          |
| 2558669554 | DRAFT_00222 | Coordinates    | 82986..83855(+)                                                     |          |

|            |             |                |                                                        |          |
|------------|-------------|----------------|--------------------------------------------------------|----------|
| 2558669554 | DRAFT_00222 | DNA_length     | 870bp                                                  |          |
| 2558669554 | DRAFT_00222 | Protein_length | 289aa                                                  |          |
| 2558669554 | DRAFT_00222 | GC             |                                                        | 0.53     |
| 2558669554 | DRAFT_00222 | Transmembrane  | Yes                                                    |          |
| 2558669555 | DRAFT_00223 | COG_category   | [R] General function prediction only                   |          |
| 2558669555 | DRAFT_00223 | COG2129        | Predicted phosphoesterases, related to the lcc protein | 2.00E-31 |
| 2558669555 | DRAFT_00223 | Locus_type     | CDS                                                    |          |
| 2558669555 | DRAFT_00223 | Product_name   | Predicted phosphoesterases, related to the lcc protein |          |
| 2558669555 | DRAFT_00223 | Scaffold       | DRAFT_contig_70_6_len_107089_read_count_1768889.2      |          |
| 2558669555 | DRAFT_00223 | Coordinates    | 83864..84823(-)                                        |          |
| 2558669555 | DRAFT_00223 | DNA_length     | 960bp                                                  |          |
| 2558669555 | DRAFT_00223 | Protein_length | 319aa                                                  |          |
| 2558669555 | DRAFT_00223 | GC             |                                                        | 0.57     |
| 2558669556 | DRAFT_00224 | Locus_type     | CDS                                                    |          |
| 2558669556 | DRAFT_00224 | Product_name   | hypothetical protein                                   |          |
| 2558669556 | DRAFT_00224 | Scaffold       | DRAFT_contig_70_6_len_107089_read_count_1768889.2      |          |
| 2558669556 | DRAFT_00224 | Coordinates    | 84985..85293(+)                                        |          |
| 2558669556 | DRAFT_00224 | DNA_length     | 309bp                                                  |          |
| 2558669556 | DRAFT_00224 | Protein_length | 102aa                                                  |          |
| 2558669556 | DRAFT_00224 | GC             |                                                        | 0.5      |
| 2558669556 | DRAFT_00224 | Transmembrane  | Yes                                                    |          |
| 2558669557 | DRAFT_00225 | Locus_type     | CDS                                                    |          |
| 2558669557 | DRAFT_00225 | Product_name   | hypothetical protein                                   |          |
| 2558669557 | DRAFT_00225 | Scaffold       | DRAFT_contig_70_6_len_107089_read_count_1768889.2      |          |
| 2558669557 | DRAFT_00225 | Coordinates    | 85342..85467(+)                                        |          |
| 2558669557 | DRAFT_00225 | DNA_length     | 126bp                                                  |          |
| 2558669557 | DRAFT_00225 | Protein_length | 41aa                                                   |          |
| 2558669557 | DRAFT_00225 | GC             |                                                        | 0.52     |
| 2558669558 | DRAFT_00226 | Locus_type     | CDS                                                    |          |
| 2558669558 | DRAFT_00226 | Product_name   | hypothetical protein                                   |          |

|            |             |                |                                                   |          |
|------------|-------------|----------------|---------------------------------------------------|----------|
| 2558669558 | DRAFT_00226 | Scaffold       | DRAFT_contig_70_6_len_107089_read_count_1768889.2 |          |
| 2558669558 | DRAFT_00226 | Coordinates    | 85451..85660(+)                                   |          |
| 2558669558 | DRAFT_00226 | DNA_length     | 210bp                                             |          |
| 2558669558 | DRAFT_00226 | Protein_length | 69aa                                              |          |
| 2558669558 | DRAFT_00226 | GC             |                                                   | 0.54     |
| 2558669559 | DRAFT_00227 | COG_category   | [R] General function prediction only              |          |
| 2558669559 | DRAFT_00227 | COG1694        | Predicted pyrophosphatase                         | 3.00E-03 |
| 2558669559 | DRAFT_00227 | Locus_type     | CDS                                               |          |
| 2558669559 | DRAFT_00227 | Product_name   | Predicted pyrophosphatase                         |          |
| 2558669559 | DRAFT_00227 | Scaffold       | DRAFT_contig_70_6_len_107089_read_count_1768889.2 |          |
| 2558669559 | DRAFT_00227 | Coordinates    | 85657..85983(-)                                   |          |
| 2558669559 | DRAFT_00227 | DNA_length     | 327bp                                             |          |
| 2558669559 | DRAFT_00227 | Protein_length | 108aa                                             |          |
| 2558669559 | DRAFT_00227 | GC             |                                                   | 0.56     |
| 2558669560 | DRAFT_00228 | COG_category   | [L] Replication, recombination and repair         |          |
| 2558669560 | DRAFT_00228 | COG0177        | Predicted EndoIII-related endonuclease            | 3.00E-65 |
| 2558669560 | DRAFT_00228 | pfam00730      | HhH-GPD                                           | 3.10E-26 |
| 2558669560 | DRAFT_00228 | EC:4.2.99.18   | DNA-(apurinic or apyrimidinic site) lyase.        |          |
| 2558669560 | DRAFT_00228 | TIGR01083      | endonuclease III                                  | 3.10E-61 |
| 2558669560 | DRAFT_00228 | KO:K10773      | endonuclease III [EC:4.2.99.18]                   | 0.00E+00 |
| 2558669560 | DRAFT_00228 | Locus_type     | CDS                                               |          |
| 2558669560 | DRAFT_00228 | Product_name   | Predicted EndoIII-related endonuclease            |          |
| 2558669560 | DRAFT_00228 | Scaffold       | DRAFT_contig_70_6_len_107089_read_count_1768889.2 |          |
| 2558669560 | DRAFT_00228 | Coordinates    | 86007..86846(-)                                   |          |
| 2558669560 | DRAFT_00228 | DNA_length     | 840bp                                             |          |
| 2558669560 | DRAFT_00228 | Protein_length | 279aa                                             |          |
| 2558669560 | DRAFT_00228 | GC             |                                                   | 0.58     |
| 2558669561 | DRAFT_00229 | COG_category   | [R] General function prediction only              |          |
| 2558669561 | DRAFT_00229 | COG0517        | FOG: CBS domain                                   | 2.00E-13 |
| 2558669561 | DRAFT_00229 | pfam00571      | CBS                                               | 6.00E-09 |
| 2558669561 | DRAFT_00229 | pfam00571      | CBS                                               | 1.30E-13 |

|            |             |                |                                                                       |          |
|------------|-------------|----------------|-----------------------------------------------------------------------|----------|
| 2558669561 | DRAFT_00229 | Locus_type     | CDS                                                                   |          |
| 2558669561 | DRAFT_00229 | Product_name   | FOG: CBS domain                                                       |          |
| 2558669561 | DRAFT_00229 | Scaffold       | DRAFT_contig_70_6_len_107089_read_count_1768889.2                     |          |
| 2558669561 | DRAFT_00229 | Coordinates    | 87016..87444(-)                                                       |          |
| 2558669561 | DRAFT_00229 | DNA_length     | 429bp                                                                 |          |
| 2558669561 | DRAFT_00229 | Protein_length | 142aa                                                                 |          |
| 2558669561 | DRAFT_00229 | GC             |                                                                       | 0.55     |
|            |             |                |                                                                       |          |
| 2558669562 | DRAFT_00230 | COG_category   | [T] Signal transduction mechanisms                                    |          |
| 2558669562 | DRAFT_00230 | COG0589        | Universal stress protein UspA and related nucleotide-binding proteins | 4.00E-19 |
| 2558669562 | DRAFT_00230 | pfam00582      | Usp                                                                   | 1.20E-31 |
| 2558669562 | DRAFT_00230 | Locus_type     | CDS                                                                   |          |
| 2558669562 | DRAFT_00230 | Product_name   | Universal stress protein UspA and related nucleotide-binding proteins |          |
| 2558669562 | DRAFT_00230 | Scaffold       | DRAFT_contig_70_6_len_107089_read_count_1768889.2                     |          |
| 2558669562 | DRAFT_00230 | Coordinates    | 87449..87910(-)                                                       |          |
| 2558669562 | DRAFT_00230 | DNA_length     | 462bp                                                                 |          |
| 2558669562 | DRAFT_00230 | Protein_length | 153aa                                                                 |          |
| 2558669562 | DRAFT_00230 | GC             |                                                                       | 0.62     |
|            |             |                |                                                                       |          |
| 2558669563 | DRAFT_00231 | COG_category   | [S] Function unknown                                                  |          |
| 2558669563 | DRAFT_00231 | COG2210        | Uncharacterized conserved protein                                     | 7.00E-22 |
| 2558669563 | DRAFT_00231 | pfam13686      | DrsE_2                                                                | 5.70E-41 |
| 2558669563 | DRAFT_00231 | Locus_type     | CDS                                                                   |          |
| 2558669563 | DRAFT_00231 | Product_name   | Uncharacterized conserved protein                                     |          |
| 2558669563 | DRAFT_00231 | Scaffold       | DRAFT_contig_70_6_len_107089_read_count_1768889.2                     |          |
| 2558669563 | DRAFT_00231 | Coordinates    | 88031..88537(+)                                                       |          |
| 2558669563 | DRAFT_00231 | DNA_length     | 507bp                                                                 |          |
| 2558669563 | DRAFT_00231 | Protein_length | 168aa                                                                 |          |
| 2558669563 | DRAFT_00231 | GC             |                                                                       | 0.57     |
|            |             |                |                                                                       |          |
| 2558669564 | DRAFT_00232 | COG_category   | [O] Posttranslational modification, protein turnover, chaperones      |          |
| 2558669564 | DRAFT_00232 | COG0425        | Predicted redox protein, regulator of disulfide bond formation        | 8.00E-12 |
| 2558669564 | DRAFT_00232 | pfam01206      | TusA                                                                  | 2.30E-17 |
| 2558669564 | DRAFT_00232 | Locus_type     | CDS                                                                   |          |



|            |             |                |                                                                |          |
|------------|-------------|----------------|----------------------------------------------------------------|----------|
| 2558669564 | DRAFT_00232 | Product_name   | Predicted redox protein, regulator of disulfide bond formation |          |
| 2558669564 | DRAFT_00232 | Scaffold       | DRAFT_contig_70_6_len_107089_read_count_1768889.2              |          |
| 2558669564 | DRAFT_00232 | Coordinates    | 88546..88794(+)                                                |          |
| 2558669564 | DRAFT_00232 | DNA_length     | 249bp                                                          |          |
| 2558669564 | DRAFT_00232 | Protein_length | 82aa                                                           |          |
| 2558669564 | DRAFT_00232 | GC             |                                                                | 0.55     |
|            |             |                |                                                                |          |
| 2558669565 | DRAFT_00233 | COG_category   | [C] Energy production and conversion                           |          |
| 2558669565 | DRAFT_00233 | COG1252        | NADH dehydrogenase, FAD-containing subunit                     | 3.00E-22 |
| 2558669565 | DRAFT_00233 | pfam07992      | Pyr_redox_2                                                    | 5.80E-08 |
| 2558669565 | DRAFT_00233 | Locus_type     | CDS                                                            |          |
| 2558669565 | DRAFT_00233 | Product_name   | NADH dehydrogenase, FAD-containing subunit                     |          |
| 2558669565 | DRAFT_00233 | Scaffold       | DRAFT_contig_70_6_len_107089_read_count_1768889.2              |          |
| 2558669565 | DRAFT_00233 | Coordinates    | 88795..90024(+)                                                |          |
| 2558669565 | DRAFT_00233 | DNA_length     | 1230bp                                                         |          |
| 2558669565 | DRAFT_00233 | Protein_length | 409aa                                                          |          |
| 2558669565 | DRAFT_00233 | GC             |                                                                | 0.59     |
|            |             |                |                                                                |          |
| 2558669566 | DRAFT_00234 | Locus_type     | CDS                                                            |          |
| 2558669566 | DRAFT_00234 | Product_name   | hypothetical protein                                           |          |
| 2558669566 | DRAFT_00234 | Scaffold       | DRAFT_contig_70_6_len_107089_read_count_1768889.2              |          |
| 2558669566 | DRAFT_00234 | Coordinates    | 90090..90452(+)                                                |          |
| 2558669566 | DRAFT_00234 | DNA_length     | 363bp                                                          |          |
| 2558669566 | DRAFT_00234 | Protein_length | 120aa                                                          |          |
| 2558669566 | DRAFT_00234 | GC             |                                                                | 0.55     |
|            |             |                |                                                                |          |
| 2558669567 | DRAFT_00235 | Locus_type     | CDS                                                            |          |
| 2558669567 | DRAFT_00235 | Product_name   | hypothetical protein                                           |          |
| 2558669567 | DRAFT_00235 | Scaffold       | DRAFT_contig_70_6_len_107089_read_count_1768889.2              |          |
| 2558669567 | DRAFT_00235 | Coordinates    | 90516..90788(+)                                                |          |
| 2558669567 | DRAFT_00235 | DNA_length     | 273bp                                                          |          |
| 2558669567 | DRAFT_00235 | Protein_length | 90aa                                                           |          |
| 2558669567 | DRAFT_00235 | GC             |                                                                | 0.54     |
| 2558669567 | DRAFT_00235 | Transmembrane  | Yes                                                            |          |

|            |             |                |                                                          |           |
|------------|-------------|----------------|----------------------------------------------------------|-----------|
| 2558669568 | DRAFT_00236 | COG_category   | [C] Energy production and conversion                     |           |
| 2558669568 | DRAFT_00236 | COG1042        | Acyl-CoA synthetase (NDP forming)                        | 3.00E-125 |
| 2558669568 | DRAFT_00236 | pfam13380      | CoA_binding_2                                            | 2.40E-22  |
| 2558669568 | DRAFT_00236 | pfam13549      | ATP-grasp_5                                              | 9.50E-62  |
| 2558669568 | DRAFT_00236 | pfam13607      | Succ_CoA_lig                                             | 8.80E-53  |
| 2558669568 | DRAFT_00236 | pfam00583      | Acetyltransf_1                                           | 1.40E-04  |
| 2558669568 | DRAFT_00236 | TIGR02717      | acetyl coenzyme A synthetase (ADP forming), alpha domain | 0.00E+00  |
| 2558669568 | DRAFT_00236 | Locus_type     | CDS                                                      |           |
| 2558669568 | DRAFT_00236 | Product_name   | Acyl-CoA synthetase (NDP forming)                        |           |
| 2558669568 | DRAFT_00236 | Scaffold       | DRAFT_contig_70_6_len_107089_read_count_1768889.2        |           |
| 2558669568 | DRAFT_00236 | Coordinates    | 91113..93521(+)                                          |           |
| 2558669568 | DRAFT_00236 | DNA_length     | 2409bp                                                   |           |
| 2558669568 | DRAFT_00236 | Protein_length | 802aa                                                    |           |
| 2558669568 | DRAFT_00236 | GC             |                                                          | 0.63      |
| 2558669568 | DRAFT_00236 | Fused_gene     | Yes                                                      |           |
| 2558669569 | DRAFT_00237 | KEGG_module    | M00357: Methanogenesis, acetate => methane               |           |
| 2558669569 | DRAFT_00237 | Metacyc        | GLUDEG-II-PWY: glutamate degradation VII (to butanoate)  |           |
| 2558669569 | DRAFT_00237 | Metacyc        | PWY66-162: ethanol degradation IV                        |           |
| 2558669569 | DRAFT_00237 | Metacyc        | PWY0-1313: acetate conversion to acetyl-CoA              |           |
| 2558669569 | DRAFT_00237 | Metacyc        | PWY-6672: <i>cis</i>-genanyl-CoA degradation             |           |
| 2558669569 | DRAFT_00237 | Metacyc        | PWY66-161: oxidative ethanol degradation III             |           |
| 2558669569 | DRAFT_00237 | Metacyc        | PWY66-21: ethanol degradation II                         |           |
| 2558669569 | DRAFT_00237 | COG_category   | [I] Lipid transport and metabolism                       |           |
| 2558669569 | DRAFT_00237 | COG0365        | Acyl-coenzyme A synthetases/AMP-(fatty) acid ligases     | 0.00E+00  |
| 2558669569 | DRAFT_00237 | pfam00501      | AMP-binding                                              | 2.80E-83  |
| 2558669569 | DRAFT_00237 | pfam13193      | AMP-binding_C                                            | 1.20E-15  |
| 2558669569 | DRAFT_00237 | EC:6.2.1.1     | Acetate--CoA ligase.                                     |           |
| 2558669569 | DRAFT_00237 | TIGR02188      | acetate--CoA ligase                                      | 0.00E+00  |
| 2558669569 | DRAFT_00237 | KO:K01895      | acetyl-CoA synthetase [EC:6.2.1.1]                       | 0.00E+00  |
| 2558669569 | DRAFT_00237 | ITERM:05018    | acetyl-coenzyme A synthetase (EC 6.2.1.1)                |           |
| 2558669569 | DRAFT_00237 | Locus_type     | CDS                                                      |           |
| 2558669569 | DRAFT_00237 | Product_name   | acetyl-coenzyme A synthetase (EC 6.2.1.1)                |           |

|            |             |                |                                                                    |                                                   |           |
|------------|-------------|----------------|--------------------------------------------------------------------|---------------------------------------------------|-----------|
| 2558669569 | DRAFT_00237 | Scaffold       |                                                                    | DRAFT_contig_70_6_len_107089_read_count_1768889.2 |           |
| 2558669569 | DRAFT_00237 | Coordinates    |                                                                    | 93603..95639(+)                                   |           |
| 2558669569 | DRAFT_00237 | DNA_length     |                                                                    | 2037bp                                            |           |
| 2558669569 | DRAFT_00237 | Protein_length |                                                                    | 678aa                                             |           |
| 2558669569 | DRAFT_00237 | GC             |                                                                    |                                                   | 0.59      |
| 2558669570 | DRAFT_00238 | COG_category   | [S] Function unknown                                               |                                                   |           |
| 2558669570 | DRAFT_00238 | COG1584        | Predicted membrane protein                                         |                                                   | 3.00E-38  |
| 2558669570 | DRAFT_00238 | pfam01184      | Grp1_Fun34_YaaH                                                    |                                                   | 4.40E-47  |
| 2558669570 | DRAFT_00238 | Locus_type     |                                                                    | CDS                                               |           |
| 2558669570 | DRAFT_00238 | Product_name   |                                                                    | Predicted membrane protein                        |           |
| 2558669570 | DRAFT_00238 | Scaffold       |                                                                    | DRAFT_contig_70_6_len_107089_read_count_1768889.2 |           |
| 2558669570 | DRAFT_00238 | Coordinates    |                                                                    | 95660..96277(-)                                   |           |
| 2558669570 | DRAFT_00238 | DNA_length     |                                                                    | 618bp                                             |           |
| 2558669570 | DRAFT_00238 | Protein_length |                                                                    | 205aa                                             |           |
| 2558669570 | DRAFT_00238 | GC             |                                                                    |                                                   | 0.58      |
| 2558669570 | DRAFT_00238 | Transmembrane  |                                                                    | Yes                                               |           |
| 2558669571 | DRAFT_00239 | Locus_type     |                                                                    | CDS                                               |           |
| 2558669571 | DRAFT_00239 | Product_name   |                                                                    | hypothetical protein                              |           |
| 2558669571 | DRAFT_00239 | Scaffold       |                                                                    | DRAFT_contig_70_6_len_107089_read_count_1768889.2 |           |
| 2558669571 | DRAFT_00239 | Coordinates    |                                                                    | 96402..96710(-)                                   |           |
| 2558669571 | DRAFT_00239 | DNA_length     |                                                                    | 309bp                                             |           |
| 2558669571 | DRAFT_00239 | Protein_length |                                                                    | 102aa                                             |           |
| 2558669571 | DRAFT_00239 | GC             |                                                                    |                                                   | 0.56      |
| 2558669572 | DRAFT_00240 | Metacyc        | PWY-1341: phenylacetate degradation II (anaerobic)                 |                                                   |           |
| 2558669572 | DRAFT_00240 | Metacyc        | PWY-6318: phenylalanine degradation IV (mammalian, via side chain) |                                                   |           |
| 2558669572 | DRAFT_00240 | Metacyc        | PWY0-321: phenylacetate degradation I (aerobic)                    |                                                   |           |
| 2558669572 | DRAFT_00240 | COG_category   | [H] Coenzyme transport and metabolism                              |                                                   |           |
| 2558669572 | DRAFT_00240 | COG1541        | Coenzyme F390 synthetase                                           |                                                   | 9.00E-122 |
| 2558669572 | DRAFT_00240 | pfam00501      | AMP-binding                                                        |                                                   | 4.30E-14  |
| 2558669572 | DRAFT_00240 | pfam14535      | AMP-binding_C_2                                                    |                                                   | 2.60E-11  |
| 2558669572 | DRAFT_00240 | EC:6.2.1.30    | Phenylacetate--CoA ligase.                                         |                                                   |           |

|            |             |                |                                                   |           |
|------------|-------------|----------------|---------------------------------------------------|-----------|
| 2558669572 | DRAFT_00240 | KO:K01912      | phenylacetate-CoA ligase [EC:6.2.1.30]            | 0.00E+00  |
| 2558669572 | DRAFT_00240 | Locus_type     | CDS                                               |           |
| 2558669572 | DRAFT_00240 | Product_name   | phenylacetate-CoA ligase (EC 6.2.1.30)            |           |
| 2558669572 | DRAFT_00240 | Scaffold       | DRAFT_contig_70_6_len_107089_read_count_1768889.2 |           |
| 2558669572 | DRAFT_00240 | Coordinates    | 97076..98392(+)                                   |           |
| 2558669572 | DRAFT_00240 | DNA_length     | 1317bp                                            |           |
| 2558669572 | DRAFT_00240 | Protein_length | 438aa                                             |           |
| 2558669572 | DRAFT_00240 | GC             |                                                   | 0.55      |
| 2558669573 | DRAFT_00241 | Locus_type     | CDS                                               |           |
| 2558669573 | DRAFT_00241 | Product_name   | hypothetical protein                              |           |
| 2558669573 | DRAFT_00241 | Scaffold       | DRAFT_contig_70_6_len_107089_read_count_1768889.2 |           |
| 2558669573 | DRAFT_00241 | Coordinates    | 98535..98960(+)                                   |           |
| 2558669573 | DRAFT_00241 | DNA_length     | 426bp                                             |           |
| 2558669573 | DRAFT_00241 | Protein_length | 141aa                                             |           |
| 2558669573 | DRAFT_00241 | GC             |                                                   | 0.57      |
| 2558669573 | DRAFT_00241 | Transmembrane  | Yes                                               |           |
| 2558669574 | DRAFT_00242 | IMG_pathway    | 667: Ammonium transport via ammonium channel      |           |
| 2558669574 | DRAFT_00242 | COG_category   | [P] Inorganic ion transport and metabolism        |           |
| 2558669574 | DRAFT_00242 | COG0004        | Ammonia permease                                  | 4.00E-120 |
| 2558669574 | DRAFT_00242 | pfam00909      | Ammonium_transp                                   | 1.80E-122 |
| 2558669574 | DRAFT_00242 | TIGR00836      | ammonium transporter                              | 0.00E+00  |
| 2558669574 | DRAFT_00242 | KO:K03320      | ammonium transporter, Amt family                  | 0.00E+00  |
| 2558669574 | DRAFT_00242 | ITERM:05717    | ammonium transporter (TC 1.A.11)                  |           |
| 2558669574 | DRAFT_00242 | Locus_type     | CDS                                               |           |
| 2558669574 | DRAFT_00242 | Product_name   | ammonium transporter (TC 1.A.11)                  |           |
| 2558669574 | DRAFT_00242 | Scaffold       | DRAFT_contig_70_6_len_107089_read_count_1768889.2 |           |
| 2558669574 | DRAFT_00242 | Coordinates    | 98787..100055(-)                                  |           |
| 2558669574 | DRAFT_00242 | DNA_length     | 1269bp                                            |           |
| 2558669574 | DRAFT_00242 | Protein_length | 422aa                                             |           |
| 2558669574 | DRAFT_00242 | GC             |                                                   | 0.57      |
| 2558669574 | DRAFT_00242 | Transmembrane  | Yes                                               |           |

|            |             |                |                                                         |           |
|------------|-------------|----------------|---------------------------------------------------------|-----------|
| 2558669575 | DRAFT_00243 | COG_category   | [G] Carbohydrate transport and metabolism               |           |
| 2558669575 | DRAFT_00243 | COG0647        | Predicted sugar phosphatases of the HAD superfamily     | 2.00E-53  |
| 2558669575 | DRAFT_00243 | pfam13344      | Hydrolase_6                                             | 1.10E-18  |
| 2558669575 | DRAFT_00243 | pfam13242      | Hydrolase_like                                          | 1.60E-17  |
| 2558669575 | DRAFT_00243 | EC:3.1.3.41    | 4-nitrophenylphosphatase.                               |           |
| 2558669575 | DRAFT_00243 | TIGR01460      | Haloacid Dehalogenase Superfamily Class (subfamily) IIA | 3.60E-41  |
| 2558669575 | DRAFT_00243 | KO:K01101      | 4-nitrophenyl phosphatase [EC:3.1.3.41]                 | 5.20E-39  |
| 2558669575 | DRAFT_00243 | Locus_type     | CDS                                                     |           |
| 2558669575 | DRAFT_00243 | Product_name   | Predicted sugar phosphatases of the HAD superfamily     |           |
| 2558669575 | DRAFT_00243 | Scaffold       | DRAFT_contig_70_6_len_107089_read_count_1768889.2       |           |
| 2558669575 | DRAFT_00243 | Coordinates    | 100169..100951(-)                                       |           |
| 2558669575 | DRAFT_00243 | DNA_length     | 783bp                                                   |           |
| 2558669575 | DRAFT_00243 | Protein_length | 260aa                                                   |           |
| 2558669575 | DRAFT_00243 | GC             |                                                         | 0.57      |
| 2558669576 | DRAFT_00244 | COG_category   | [S] Function unknown                                    |           |
| 2558669576 | DRAFT_00244 | COG1786        | Uncharacterized conserved protein                       | 4.00E-16  |
| 2558669576 | DRAFT_00244 | pfam01989      | DUF126                                                  | 3.60E-17  |
| 2558669576 | DRAFT_00244 | KO:K09128      | hypothetical protein                                    | 1.90E-15  |
| 2558669576 | DRAFT_00244 | ITERM:01401    | predicted aconitase subunit 2 (EC 4.2.1.3)              |           |
| 2558669576 | DRAFT_00244 | Locus_type     | CDS                                                     |           |
| 2558669576 | DRAFT_00244 | Product_name   | predicted aconitase subunit 2 (EC 4.2.1.3)              |           |
| 2558669576 | DRAFT_00244 | Scaffold       | DRAFT_contig_70_6_len_107089_read_count_1768889.2       |           |
| 2558669576 | DRAFT_00244 | Coordinates    | 100948..101388(-)                                       |           |
| 2558669576 | DRAFT_00244 | DNA_length     | 441bp                                                   |           |
| 2558669576 | DRAFT_00244 | Protein_length | 146aa                                                   |           |
| 2558669576 | DRAFT_00244 | GC             |                                                         | 0.63      |
| 2558669577 | DRAFT_00245 | COG_category   | [S] Function unknown                                    |           |
| 2558669577 | DRAFT_00245 | COG1679        | Uncharacterized conserved protein                       | 3.00E-85  |
| 2558669577 | DRAFT_00245 | pfam04412      | DUF521                                                  | 5.50E-112 |
| 2558669577 | DRAFT_00245 | KO:K09123      | hypothetical protein                                    | 0.00E+00  |
| 2558669577 | DRAFT_00245 | ITERM:01400    | predicted aconitase subunit 1 (EC 4.2.1.3)              |           |
| 2558669577 | DRAFT_00245 | Locus_type     | CDS                                                     |           |

|            |             |                |                                                           |          |
|------------|-------------|----------------|-----------------------------------------------------------|----------|
| 2558669577 | DRAFT_00245 | Product_name   | predicted aconitase subunit 1 (EC 4.2.1.3)                |          |
| 2558669577 | DRAFT_00245 | Scaffold       | DRAFT_contig_70_6_len_107089_read_count_1768889.2         |          |
| 2558669577 | DRAFT_00245 | Coordinates    | 101385..102590(-)                                         |          |
| 2558669577 | DRAFT_00245 | DNA_length     | 1206bp                                                    |          |
| 2558669577 | DRAFT_00245 | Protein_length | 401aa                                                     |          |
| 2558669577 | DRAFT_00245 | GC             |                                                           | 0.6      |
| 2558669578 | DRAFT_00246 | pfam08241      | Methyltransf_11                                           | 4.80E-13 |
| 2558669578 | DRAFT_00246 | Locus_type     | CDS                                                       |          |
| 2558669578 | DRAFT_00246 | Product_name   | Methylase involved in ubiquinone/menaquinone biosynthesis |          |
| 2558669578 | DRAFT_00246 | Scaffold       | DRAFT_contig_70_6_len_107089_read_count_1768889.2         |          |
| 2558669578 | DRAFT_00246 | Coordinates    | 102982..103800(+)                                         |          |
| 2558669578 | DRAFT_00246 | DNA_length     | 819bp                                                     |          |
| 2558669578 | DRAFT_00246 | Protein_length | 272aa                                                     |          |
| 2558669578 | DRAFT_00246 | GC             |                                                           | 0.53     |
| 2558669579 | DRAFT_00247 | Locus_type     | CDS                                                       |          |
| 2558669579 | DRAFT_00247 | Product_name   | hypothetical protein                                      |          |
| 2558669579 | DRAFT_00247 | Scaffold       | DRAFT_contig_70_6_len_107089_read_count_1768889.2         |          |
| 2558669579 | DRAFT_00247 | Coordinates    | 103837..104163(-)                                         |          |
| 2558669579 | DRAFT_00247 | DNA_length     | 327bp                                                     |          |
| 2558669579 | DRAFT_00247 | Protein_length | 108aa                                                     |          |
| 2558669579 | DRAFT_00247 | GC             |                                                           | 0.52     |
| 2558669579 | DRAFT_00247 | Transmembrane  | Yes                                                       |          |
| 2558669580 | DRAFT_00248 | KEGG_module    | M00179: Ribosome, archaea                                 |          |
| 2558669580 | DRAFT_00248 | KEGG_module    | M00178: Ribosome, bacteria                                |          |
| 2558669580 | DRAFT_00248 | COG_category   | [J] Translation, ribosomal structure and biogenesis       |          |
| 2558669580 | DRAFT_00248 | COG0051        | Ribosomal protein S10                                     | 9.00E-24 |
| 2558669580 | DRAFT_00248 | pfam00338      | Ribosomal_S10                                             | 3.00E-28 |
| 2558669580 | DRAFT_00248 | TIGR01046      | ribosomal protein S10(archaeal)/S20(eukaryotic)           | 1.40E-45 |
| 2558669580 | DRAFT_00248 | KO:K02946      | small subunit ribosomal protein S10                       | 2.00E-30 |
| 2558669580 | DRAFT_00248 | ITERM:00293    | SSU ribosomal protein S10P                                |          |
| 2558669580 | DRAFT_00248 | Locus_type     | CDS                                                       |          |

|            |             |                |                                                                                |           |
|------------|-------------|----------------|--------------------------------------------------------------------------------|-----------|
| 2558669580 | DRAFT_00248 | Product_name   | SSU ribosomal protein S10P                                                     |           |
| 2558669580 | DRAFT_00248 | Scaffold       | DRAFT_contig_70_6_len_107089_read_count_1768889.2                              |           |
| 2558669580 | DRAFT_00248 | Coordinates    | 104290..104601(+)                                                              |           |
| 2558669580 | DRAFT_00248 | DNA_length     | 312bp                                                                          |           |
| 2558669580 | DRAFT_00248 | Protein_length | 103aa                                                                          |           |
| 2558669580 | DRAFT_00248 | GC             |                                                                                | 0.59      |
| 2558669581 | DRAFT_00249 | COG_category   | [M] Cell wall/membrane/envelope biogenesis                                     |           |
| 2558669581 | DRAFT_00249 | COG0677        | UDP-N-acetyl-D-mannosaminuronate dehydrogenase                                 | 3.00E-108 |
| 2558669581 | DRAFT_00249 | pfam00984      | UDPG_MGDP_dh                                                                   | 3.00E-20  |
| 2558669581 | DRAFT_00249 | pfam03720      | UDPG_MGDP_dh_C                                                                 | 1.70E-24  |
| 2558669581 | DRAFT_00249 | pfam03721      | UDPG_MGDP_dh_N                                                                 | 8.00E-38  |
| 2558669581 | DRAFT_00249 | TIGR03026      | nucleotide sugar dehydrogenase                                                 | 4.90E-113 |
| 2558669581 | DRAFT_00249 | Locus_type     | CDS                                                                            |           |
| 2558669581 | DRAFT_00249 | Product_name   | nucleotide sugar dehydrogenase                                                 |           |
| 2558669581 | DRAFT_00249 | Scaffold       | DRAFT_contig_70_6_len_107089_read_count_1768889.2                              |           |
| 2558669581 | DRAFT_00249 | Coordinates    | 104787..106151(+)                                                              |           |
| 2558669581 | DRAFT_00249 | DNA_length     | 1365bp                                                                         |           |
| 2558669581 | DRAFT_00249 | Protein_length | 454aa                                                                          |           |
| 2558669581 | DRAFT_00249 | GC             |                                                                                | 0.59      |
| 2558669581 | DRAFT_00249 | Transmembrane  | Yes                                                                            |           |
| 2558669582 | DRAFT_00250 | KEGG_module    | M00366: C10-C20 isoprenoid biosynthesis, plants                                |           |
| 2558669582 | DRAFT_00250 | KEGG_module    | M00365: C10-C20 isoprenoid biosynthesis, archaea                               |           |
| 2558669582 | DRAFT_00250 | KEGG_module    | M00095: C5 isoprenoid biosynthesis, mevalonate pathway                         |           |
| 2558669582 | DRAFT_00250 | KEGG_module    | M00367: C10-C20 isoprenoid biosynthesis, non-plant eukaryotes                  |           |
| 2558669582 | DRAFT_00250 | KEGG_module    | M00364: C10-C20 isoprenoid biosynthesis, bacteria                              |           |
| 2558669582 | DRAFT_00250 | KEGG_module    | M00096: C5 isoprenoid biosynthesis, non-mevalonate pathway                     |           |
| 2558669582 | DRAFT_00250 | Metacyc        | PWY-6383: mono-<i>trans</i>, poly-<i>cis</i> decaprenyl phosphate biosynthesis |           |
| 2558669582 | DRAFT_00250 | Metacyc        | NONMEVIPP-PWY: methylerythritol phosphate pathway                              |           |
| 2558669582 | DRAFT_00250 | Metacyc        | PWY-6859: <i>all-trans</i>-farnesol biosynthesis                               |           |
| 2558669582 | DRAFT_00250 | Metacyc        | PWY-922: mevalonate pathway I                                                  |           |
| 2558669582 | DRAFT_00250 | Metacyc        | PWY-5123: <i>trans, trans</i>-farnesyl diphosphate biosynthesis                |           |
| 2558669582 | DRAFT_00250 | Metacyc        | PWY-6174: mevalonate pathway II (archaea)                                      |           |

|            |             |                |                                                                                             |          |
|------------|-------------|----------------|---------------------------------------------------------------------------------------------|----------|
| 2558669582 | DRAFT_00250 | Metacyc        | PWY-7102: bisabolene biosynthesis                                                           |          |
| 2558669582 | DRAFT_00250 | IMG_pathway    | 365: dimetyhylallyl pyrophosphate biosynthesis via isomerization of isopentenyl diphosphate |          |
| 2558669582 | DRAFT_00250 | COG_category   | [I] Lipid transport and metabolism                                                          |          |
| 2558669582 | DRAFT_00250 | COG1443        | Isopentenyl diphosphate isomerase                                                           | 2.00E-14 |
| 2558669582 | DRAFT_00250 | pfam00293      | NUDIX                                                                                       | 3.90E-17 |
| 2558669582 | DRAFT_00250 | EC:5.3.3.2     | Isopentenyl-diphosphate Delta-isomerase.                                                    |          |
| 2558669582 | DRAFT_00250 | KO:K01823      | isopentenyl-diphosphate delta-isomerase [EC:5.3.3.2]                                        | 9.50E-19 |
| 2558669582 | DRAFT_00250 | ITERM:00469    | isopentenyl-diphosphate delta-isomerase (EC 5.3.3.2)                                        |          |
| 2558669582 | DRAFT_00250 | Locus_type     | CDS                                                                                         |          |
| 2558669582 | DRAFT_00250 | Product_name   | isopentenyl-diphosphate delta-isomerase (EC 5.3.3.2)                                        |          |
| 2558669582 | DRAFT_00250 | Scaffold       | DRAFT_contig_70_6_len_107089_read_count_1768889.2                                           |          |
| 2558669582 | DRAFT_00250 | Coordinates    | 106163..106729(-)                                                                           |          |
| 2558669582 | DRAFT_00250 | DNA_length     | 567bp                                                                                       |          |
| 2558669582 | DRAFT_00250 | Protein_length | 188aa                                                                                       |          |
| 2558669582 | DRAFT_00250 | GC             |                                                                                             | 0.6      |
|            |             |                |                                                                                             |          |
| 2558669583 | DRAFT_00251 | Locus_type     | CDS                                                                                         |          |
| 2558669583 | DRAFT_00251 | Product_name   | hypothetical protein                                                                        |          |
| 2558669583 | DRAFT_00251 | Scaffold       | DRAFT_contig_70_6_len_107089_read_count_1768889.2                                           |          |
| 2558669583 | DRAFT_00251 | Coordinates    | 106792..107088(+)                                                                           |          |
| 2558669583 | DRAFT_00251 | DNA_length     | 297bp                                                                                       |          |
| 2558669583 | DRAFT_00251 | Protein_length | 99aa                                                                                        |          |
| 2558669583 | DRAFT_00251 | GC             |                                                                                             | 0.52     |
| 2558669583 | DRAFT_00251 | Transmembrane  | Yes                                                                                         |          |
|            |             |                |                                                                                             |          |
| 2558669584 | DRAFT_00252 | Locus_type     | CDS                                                                                         |          |
| 2558669584 | DRAFT_00252 | Product_name   | hypothetical protein                                                                        |          |
| 2558669584 | DRAFT_00252 | Scaffold       | DRAFT_contig_70_22_len_70082_read_count_1249074.3                                           |          |
| 2558669584 | DRAFT_00252 | Coordinates    | 2..166(-)                                                                                   |          |
| 2558669584 | DRAFT_00252 | DNA_length     | 165bp                                                                                       |          |
| 2558669584 | DRAFT_00252 | Protein_length | 55aa                                                                                        |          |
| 2558669584 | DRAFT_00252 | GC             |                                                                                             | 0.63     |
|            |             |                |                                                                                             |          |
| 2558669585 | DRAFT_00253 | COG_category   | [S] Function unknown                                                                        |          |



|            |             |                |                                                                        |          |
|------------|-------------|----------------|------------------------------------------------------------------------|----------|
| 2558669585 | DRAFT_00253 | COG3410        | Uncharacterized conserved protein                                      | 1.00E-18 |
| 2558669585 | DRAFT_00253 | pfam09848      | DUF2075                                                                | 8.20E-89 |
| 2558669585 | DRAFT_00253 | KO:K09384      | hypothetical protein                                                   | 0.00E+00 |
| 2558669585 | DRAFT_00253 | Locus_type     | CDS                                                                    |          |
| 2558669585 | DRAFT_00253 | Product_name   | Uncharacterized conserved protein                                      |          |
| 2558669585 | DRAFT_00253 | Scaffold       | DRAFT_contig_70_22_len_70082_read_count_1249074.3                      |          |
| 2558669585 | DRAFT_00253 | Coordinates    | 614..2482(-)                                                           |          |
| 2558669585 | DRAFT_00253 | DNA_length     | 1869bp                                                                 |          |
| 2558669585 | DRAFT_00253 | Protein_length | 622aa                                                                  |          |
| 2558669585 | DRAFT_00253 | GC             |                                                                        | 0.57     |
| 2558669586 | DRAFT_00254 | COG_category   | [R] General function prediction only                                   |          |
| 2558669586 | DRAFT_00254 | COG1694        | Predicted pyrophosphatase                                              | 4.00E-04 |
| 2558669586 | DRAFT_00254 | pfam03819      | MazG                                                                   | 1.80E-04 |
| 2558669586 | DRAFT_00254 | Locus_type     | CDS                                                                    |          |
| 2558669586 | DRAFT_00254 | Product_name   | Predicted pyrophosphatase                                              |          |
| 2558669586 | DRAFT_00254 | Scaffold       | DRAFT_contig_70_22_len_70082_read_count_1249074.3                      |          |
| 2558669586 | DRAFT_00254 | Coordinates    | 2479..2811(-)                                                          |          |
| 2558669586 | DRAFT_00254 | DNA_length     | 333bp                                                                  |          |
| 2558669586 | DRAFT_00254 | Protein_length | 110aa                                                                  |          |
| 2558669586 | DRAFT_00254 | GC             |                                                                        | 0.5      |
| 2558669587 | DRAFT_00255 | COG_category   | [R] General function prediction only                                   |          |
| 2558669587 | DRAFT_00255 | COG0596        | Predicted hydrolases or acyltransferases (alpha/beta hydrolase superfa | 7.00E-20 |
| 2558669587 | DRAFT_00255 | pfam12697      | Abhydrolase_6                                                          | 6.40E-31 |
| 2558669587 | DRAFT_00255 | Locus_type     | CDS                                                                    |          |
| 2558669587 | DRAFT_00255 | Product_name   | Predicted hydrolases or acyltransferases (alpha/beta hydrolase superi  |          |
| 2558669587 | DRAFT_00255 | Scaffold       | DRAFT_contig_70_22_len_70082_read_count_1249074.3                      |          |
| 2558669587 | DRAFT_00255 | Coordinates    | 3805..4533(+)                                                          |          |
| 2558669587 | DRAFT_00255 | DNA_length     | 729bp                                                                  |          |
| 2558669587 | DRAFT_00255 | Protein_length | 242aa                                                                  |          |
| 2558669587 | DRAFT_00255 | GC             |                                                                        | 0.59     |
| 2558669588 | DRAFT_00256 | KEGG_module    | M00248: Putative antibiotic transport system                           |          |

|            |             |                |                                                         |          |
|------------|-------------|----------------|---------------------------------------------------------|----------|
| 2558669588 | DRAFT_00256 | pfam12698      | ABC2_membrane_3                                         | 6.80E-34 |
| 2558669588 | DRAFT_00256 | KO:K09686      | antibiotic transport system permease protein            | 0.00E+00 |
| 2558669588 | DRAFT_00256 | Locus_type     | CDS                                                     |          |
| 2558669588 | DRAFT_00256 | Product_name   | ABC-type multidrug transport system, permease component |          |
| 2558669588 | DRAFT_00256 | Scaffold       | DRAFT_contig_70_22_len_70082_read_count_1249074.3       |          |
| 2558669588 | DRAFT_00256 | Coordinates    | 4514..5605(-)                                           |          |
| 2558669588 | DRAFT_00256 | DNA_length     | 1092bp                                                  |          |
| 2558669588 | DRAFT_00256 | Protein_length | 363aa                                                   |          |
| 2558669588 | DRAFT_00256 | GC             |                                                         | 0.59     |
| 2558669588 | DRAFT_00256 | Transmembrane  | Yes                                                     |          |
| 2558669589 | DRAFT_00257 | KEGG_module    | M00248: Putative antibiotic transport system            |          |
| 2558669589 | DRAFT_00257 | COG_category   | [V] Defense mechanisms                                  |          |
| 2558669589 | DRAFT_00257 | COG1131        | ABC-type multidrug transport system, ATPase component   | 2.00E-66 |
| 2558669589 | DRAFT_00257 | pfam00005      | ABC_tran                                                | 6.20E-24 |
| 2558669589 | DRAFT_00257 | KO:K09687      | antibiotic transport system ATP-binding protein         | 0.00E+00 |
| 2558669589 | DRAFT_00257 | Locus_type     | CDS                                                     |          |
| 2558669589 | DRAFT_00257 | Product_name   | ABC-type multidrug transport system, ATPase component   |          |
| 2558669589 | DRAFT_00257 | Scaffold       | DRAFT_contig_70_22_len_70082_read_count_1249074.3       |          |
| 2558669589 | DRAFT_00257 | Coordinates    | 5612..6544(-)                                           |          |
| 2558669589 | DRAFT_00257 | DNA_length     | 933bp                                                   |          |
| 2558669589 | DRAFT_00257 | Protein_length | 310aa                                                   |          |
| 2558669589 | DRAFT_00257 | GC             |                                                         | 0.62     |
| 2558669590 | DRAFT_00258 | Locus_type     | CDS                                                     |          |
| 2558669590 | DRAFT_00258 | Product_name   | hypothetical protein                                    |          |
| 2558669590 | DRAFT_00258 | Scaffold       | DRAFT_contig_70_22_len_70082_read_count_1249074.3       |          |
| 2558669590 | DRAFT_00258 | Coordinates    | 6669..7301(+)                                           |          |
| 2558669590 | DRAFT_00258 | DNA_length     | 633bp                                                   |          |
| 2558669590 | DRAFT_00258 | Protein_length | 210aa                                                   |          |
| 2558669590 | DRAFT_00258 | GC             |                                                         | 0.59     |
| 2558669590 | DRAFT_00258 | Transmembrane  | Yes                                                     |          |
| 2558669591 | DRAFT_00259 | Locus_type     | CDS                                                     |          |

|            |             |                |                                                   |           |
|------------|-------------|----------------|---------------------------------------------------|-----------|
| 2558669591 | DRAFT_00259 | Product_name   | hypothetical protein                              |           |
| 2558669591 | DRAFT_00259 | Scaffold       | DRAFT_contig_70_22_len_70082_read_count_1249074.3 |           |
| 2558669591 | DRAFT_00259 | Coordinates    | 7175..7429(-)                                     |           |
| 2558669591 | DRAFT_00259 | DNA_length     | 255bp                                             |           |
| 2558669591 | DRAFT_00259 | Protein_length | 84aa                                              |           |
| 2558669591 | DRAFT_00259 | GC             |                                                   | 0.6       |
| 2558669592 | DRAFT_00260 | COG_category   | [R] General function prediction only              |           |
| 2558669592 | DRAFT_00260 | COG0431        | Predicted flavoprotein                            | 6.00E-34  |
| 2558669592 | DRAFT_00260 | pfam03358      | FMN_red                                           | 5.30E-38  |
| 2558669592 | DRAFT_00260 | Locus_type     | CDS                                               |           |
| 2558669592 | DRAFT_00260 | Product_name   | Predicted flavoprotein                            |           |
| 2558669592 | DRAFT_00260 | Scaffold       | DRAFT_contig_70_22_len_70082_read_count_1249074.3 |           |
| 2558669592 | DRAFT_00260 | Coordinates    | 7441..8049(-)                                     |           |
| 2558669592 | DRAFT_00260 | DNA_length     | 609bp                                             |           |
| 2558669592 | DRAFT_00260 | Protein_length | 202aa                                             |           |
| 2558669592 | DRAFT_00260 | GC             |                                                   | 0.61      |
| 2558669593 | DRAFT_00261 | pfam13298      | LigD_N                                            | 1.60E-35  |
| 2558669593 | DRAFT_00261 | EC:6.5.1.1     | DNA ligase (ATP).                                 |           |
| 2558669593 | DRAFT_00261 | TIGR02777      | DNA ligase D, 3'-phosphoesterase domain           | 1.80E-49  |
| 2558669593 | DRAFT_00261 | KO:K01971      | DNA ligase (ATP) [EC:6.5.1.1]                     | 4.10E-43  |
| 2558669593 | DRAFT_00261 | Locus_type     | CDS                                               |           |
| 2558669593 | DRAFT_00261 | Product_name   | DNA ligase D, 3'-phosphoesterase domain           |           |
| 2558669593 | DRAFT_00261 | Scaffold       | DRAFT_contig_70_22_len_70082_read_count_1249074.3 |           |
| 2558669593 | DRAFT_00261 | Coordinates    | 8181..8813(+)                                     |           |
| 2558669593 | DRAFT_00261 | DNA_length     | 633bp                                             |           |
| 2558669593 | DRAFT_00261 | Protein_length | 210aa                                             |           |
| 2558669593 | DRAFT_00261 | GC             |                                                   | 0.61      |
| 2558669594 | DRAFT_00262 | COG_category   | [S] Function unknown                              |           |
| 2558669594 | DRAFT_00262 | COG4805        | Uncharacterized protein conserved in bacteria     | 7.00E-117 |
| 2558669594 | DRAFT_00262 | pfam05960      | DUF885                                            | 0.00E+00  |
| 2558669594 | DRAFT_00262 | Locus_type     | CDS                                               |           |

|            |             |                |                                                   |          |
|------------|-------------|----------------|---------------------------------------------------|----------|
| 2558669594 | DRAFT_00262 | Product_name   | Uncharacterized protein conserved in bacteria     |          |
| 2558669594 | DRAFT_00262 | Scaffold       | DRAFT_contig_70_22_len_70082_read_count_1249074.3 |          |
| 2558669594 | DRAFT_00262 | Coordinates    | 8835..10544(-)                                    |          |
| 2558669594 | DRAFT_00262 | DNA_length     | 1710bp                                            |          |
| 2558669594 | DRAFT_00262 | Protein_length | 569aa                                             |          |
| 2558669594 | DRAFT_00262 | GC             |                                                   | 0.63     |
| 2558669595 | DRAFT_00263 | COG_category   | [R] General function prediction only              |          |
| 2558669595 | DRAFT_00263 | COG2406        | Protein distantly related to bacterial ferritins  | 1.00E-19 |
| 2558669595 | DRAFT_00263 | pfam00210      | Ferritin                                          | 3.10E-23 |
| 2558669595 | DRAFT_00263 | KO:K03594      | bacterioferritin                                  | 4.20E-31 |
| 2558669595 | DRAFT_00263 | Locus_type     | CDS                                               |          |
| 2558669595 | DRAFT_00263 | Product_name   | Protein distantly related to bacterial ferritins  |          |
| 2558669595 | DRAFT_00263 | Scaffold       | DRAFT_contig_70_22_len_70082_read_count_1249074.3 |          |
| 2558669595 | DRAFT_00263 | Coordinates    | 11053..11535(+)                                   |          |
| 2558669595 | DRAFT_00263 | DNA_length     | 483bp                                             |          |
| 2558669595 | DRAFT_00263 | Protein_length | 160aa                                             |          |
| 2558669595 | DRAFT_00263 | GC             |                                                   | 0.55     |
| 2558669596 | DRAFT_00264 | pfam05977      | MFS_3                                             | 2.00E-30 |
| 2558669596 | DRAFT_00264 | Locus_type     | CDS                                               |          |
| 2558669596 | DRAFT_00264 | Product_name   | Arabinose efflux permease                         |          |
| 2558669596 | DRAFT_00264 | Scaffold       | DRAFT_contig_70_22_len_70082_read_count_1249074.3 |          |
| 2558669596 | DRAFT_00264 | Coordinates    | 11645..12895(+)                                   |          |
| 2558669596 | DRAFT_00264 | DNA_length     | 1251bp                                            |          |
| 2558669596 | DRAFT_00264 | Protein_length | 416aa                                             |          |
| 2558669596 | DRAFT_00264 | GC             |                                                   | 0.58     |
| 2558669596 | DRAFT_00264 | Transmembrane  | Yes                                               |          |
| 2558669597 | DRAFT_00265 | pfam00271      | Helicase_C                                        | 9.70E-07 |
| 2558669597 | DRAFT_00265 | Locus_type     | CDS                                               |          |
| 2558669597 | DRAFT_00265 | Product_name   | HrpA-like helicases                               |          |
| 2558669597 | DRAFT_00265 | Scaffold       | DRAFT_contig_70_22_len_70082_read_count_1249074.3 |          |
| 2558669597 | DRAFT_00265 | Coordinates    | 13119..14846(+)                                   |          |

|            |             |                |                                                                                  |          |
|------------|-------------|----------------|----------------------------------------------------------------------------------|----------|
| 2558669597 | DRAFT_00265 | DNA_length     | 1728bp                                                                           |          |
| 2558669597 | DRAFT_00265 | Protein_length | 575aa                                                                            |          |
| 2558669597 | DRAFT_00265 | GC             |                                                                                  | 0.48     |
| 2558669598 | DRAFT_00266 | COG_category   | [E] Amino acid transport and metabolism                                          |          |
| 2558669598 | DRAFT_00266 | COG0436        | Aspartate/tyrosine/aromatic aminotransferase                                     | 5.00E-74 |
| 2558669598 | DRAFT_00266 | pfam00155      | Aminotran_1_2                                                                    | 8.10E-62 |
| 2558669598 | DRAFT_00266 | ITERM:00170    | L-alanine aminotransferase apoenzyme (EC 2.6.1.2)                                |          |
| 2558669598 | DRAFT_00266 | Locus_type     | CDS                                                                              |          |
| 2558669598 | DRAFT_00266 | Product_name   | L-alanine aminotransferase apoenzyme (EC 2.6.1.2)                                |          |
| 2558669598 | DRAFT_00266 | Scaffold       | DRAFT_contig_70_22_len_70082_read_count_1249074.3                                |          |
| 2558669598 | DRAFT_00266 | Coordinates    | 15406..16632(-)                                                                  |          |
| 2558669598 | DRAFT_00266 | DNA_length     | 1227bp                                                                           |          |
| 2558669598 | DRAFT_00266 | Protein_length | 408aa                                                                            |          |
| 2558669598 | DRAFT_00266 | GC             |                                                                                  | 0.5      |
| 2558669599 | DRAFT_00267 | COG_category   | [E] Amino acid transport and metabolism                                          |          |
| 2558669599 | DRAFT_00267 | COG1164        | Oligoendopeptidase F                                                             | 7.00E-60 |
| 2558669599 | DRAFT_00267 | pfam01432      | Peptidase_M3                                                                     | 1.70E-37 |
| 2558669599 | DRAFT_00267 | EC:3.4.24.-    | Hydrolases. Acting on peptide bonds (peptide hydrolases). Metalloendopeptidases. |          |
| 2558669599 | DRAFT_00267 | TIGR02289      | oligoendopeptidase, M3 family                                                    | 0.00E+00 |
| 2558669599 | DRAFT_00267 | KO:K08602      | oligoendopeptidase F [EC:3.4.24.-]                                               | 0.00E+00 |
| 2558669599 | DRAFT_00267 | Locus_type     | CDS                                                                              |          |
| 2558669599 | DRAFT_00267 | Product_name   | oligoendopeptidase, M3 family                                                    |          |
| 2558669599 | DRAFT_00267 | Scaffold       | DRAFT_contig_70_22_len_70082_read_count_1249074.3                                |          |
| 2558669599 | DRAFT_00267 | Coordinates    | 16767..18431(-)                                                                  |          |
| 2558669599 | DRAFT_00267 | DNA_length     | 1665bp                                                                           |          |
| 2558669599 | DRAFT_00267 | Protein_length | 554aa                                                                            |          |
| 2558669599 | DRAFT_00267 | GC             |                                                                                  | 0.55     |
| 2558669600 | DRAFT_00268 | KEGG_module    | M00048: Inosine monophosphate biosynthesis, PRPP + glutamine => IMP              |          |
| 2558669600 | DRAFT_00268 | Metacyc        | PWY-6277: superpathway of 5-aminoimidazole ribonucleotide biosynthesis           |          |
| 2558669600 | DRAFT_00268 | Metacyc        | PWY-6122: 5-aminoimidazole ribonucleotide biosynthesis II                        |          |
| 2558669600 | DRAFT_00268 | Metacyc        | PWY-6121: 5-aminoimidazole ribonucleotide biosynthesis I                         |          |

|                        |                |                                                           |           |
|------------------------|----------------|-----------------------------------------------------------|-----------|
| 2558669600 DRAFT_00268 | IMG_pathway    | 297: 5-amino-1-(5-phospho-D-ribosyl)imidazole synthesis   |           |
| 2558669600 DRAFT_00268 | COG_category   | [F] Nucleotide transport and metabolism                   |           |
| 2558669600 DRAFT_00268 | COG0150        | Phosphoribosylaminoimidazole (AIR) synthetase             | 1.00E-88  |
| 2558669600 DRAFT_00268 | pfam00586      | AIRS                                                      | 8.00E-14  |
| 2558669600 DRAFT_00268 | pfam02769      | AIRS_C                                                    | 4.10E-23  |
| 2558669600 DRAFT_00268 | EC:6.3.3.1     | Phosphoribosylformylglycinamide cyclo-ligase.             |           |
| 2558669600 DRAFT_00268 | TIGR00878      | phosphoribosylaminoimidazole synthetase                   | 1.50E-103 |
| 2558669600 DRAFT_00268 | KO:K01933      | phosphoribosylformylglycinamide cyclo-ligase [EC:6.3.3.1] | 0.00E+00  |
| 2558669600 DRAFT_00268 | ITERM:01294    | phosphoribosylformylglycinamide cyclo-ligase (EC 6.3.3.1) |           |
| 2558669600 DRAFT_00268 | Locus_type     | CDS                                                       |           |
| 2558669600 DRAFT_00268 | Product_name   | phosphoribosylformylglycinamide cyclo-ligase (EC 6.3.3.1) |           |
| 2558669600 DRAFT_00268 | Scaffold       | DRAFT_contig_70_22_len_70082_read_count_1249074.3         |           |
| 2558669600 DRAFT_00268 | Coordinates    | 18645..19562(-)                                           |           |
| 2558669600 DRAFT_00268 | DNA_length     | 918bp                                                     |           |
| 2558669600 DRAFT_00268 | Protein_length | 305aa                                                     |           |
| 2558669600 DRAFT_00268 | GC             |                                                           | 0.59      |

|                        |                |                                                                       |          |
|------------------------|----------------|-----------------------------------------------------------------------|----------|
| 2558669601 DRAFT_00269 | KEGG_module    | M00048: Inosine monophosphate biosynthesis, PRPP + glutamine => IMP   |          |
| 2558669601 DRAFT_00269 | Metacyc        | PWY-6123: inosine-5'-phosphate biosynthesis I                         |          |
| 2558669601 DRAFT_00269 | Metacyc        | PWY-6124: inosine-5'-phosphate biosynthesis II                        |          |
| 2558669601 DRAFT_00269 | IMG_pathway    | 812: IMP biosynthesis                                                 |          |
| 2558669601 DRAFT_00269 | COG_category   | [F] Nucleotide transport and metabolism                               |          |
| 2558669601 DRAFT_00269 | COG0152        | Phosphoribosylaminoimidazolesuccinocarboxamide (SAICAR) synthase      | 4.00E-51 |
| 2558669601 DRAFT_00269 | pfam01259      | SAICAR_synt                                                           | 1.80E-59 |
| 2558669601 DRAFT_00269 | EC:6.3.2.6     | Phosphoribosylaminoimidazolesuccinocarboxamide synthase.              |          |
| 2558669601 DRAFT_00269 | TIGR00081      | phosphoribosylaminoimidazole-succinocarboxamide synthase              | 4.10E-64 |
| 2558669601 DRAFT_00269 | KO:K01923      | phosphoribosylaminoimidazole-succinocarboxamide synthase [EC:6.3.2.6] | 0.00E+00 |
| 2558669601 DRAFT_00269 | ITERM:01292    | phosphoribosylaminoimidazole-succinocarboxamide synthase (EC 6.3.2.6) |          |
| 2558669601 DRAFT_00269 | Locus_type     | CDS                                                                   |          |
| 2558669601 DRAFT_00269 | Product_name   | phosphoribosylaminoimidazole-succinocarboxamide synthase (EC 6.3.2.6) |          |
| 2558669601 DRAFT_00269 | Scaffold       | DRAFT_contig_70_22_len_70082_read_count_1249074.3                     |          |
| 2558669601 DRAFT_00269 | Coordinates    | 19701..20543(-)                                                       |          |
| 2558669601 DRAFT_00269 | DNA_length     | 843bp                                                                 |          |
| 2558669601 DRAFT_00269 | Protein_length | 280aa                                                                 |          |

|            |             |                |                                                                       |          |
|------------|-------------|----------------|-----------------------------------------------------------------------|----------|
| 2558669601 | DRAFT_00269 | GC             |                                                                       | 0.57     |
| 2558669602 | DRAFT_00270 | pfam00731      | AIRC                                                                  | 4.50E-35 |
| 2558669602 | DRAFT_00270 | TIGR01162      | phosphoribosylaminoimidazole carboxylase, PurE protein                | 2.10E-40 |
| 2558669602 | DRAFT_00270 | Locus_type     | CDS                                                                   |          |
| 2558669602 | DRAFT_00270 | Product_name   | Phosphoribosylcarboxyaminoimidazole (NCAIR) mutase                    |          |
| 2558669602 | DRAFT_00270 | Scaffold       | DRAFT_contig_70_22_len_70082_read_count_1249074.3                     |          |
| 2558669602 | DRAFT_00270 | Coordinates    | 20534..20836(-)                                                       |          |
| 2558669602 | DRAFT_00270 | DNA_length     | 303bp                                                                 |          |
| 2558669602 | DRAFT_00270 | Protein_length | 100aa                                                                 |          |
| 2558669602 | DRAFT_00270 | GC             |                                                                       | 0.58     |
| 2558669602 | DRAFT_00270 | Signal_peptide | Yes                                                                   |          |
| 2558669603 | DRAFT_00271 | Metacyc        | PWY-2201: folate transformations I                                    |          |
| 2558669603 | DRAFT_00271 | Metacyc        | PWY-3841: folate transformations II                                   |          |
| 2558669603 | DRAFT_00271 | Metacyc        | 1CMET2-PWY: formylTHF biosynthesis I                                  |          |
| 2558669603 | DRAFT_00271 | COG_category   | [H] Coenzyme transport and metabolism                                 |          |
| 2558669603 | DRAFT_00271 | COG0212        | 5-formyltetrahydrofolate cyclo-ligase                                 | 3.00E-35 |
| 2558669603 | DRAFT_00271 | pfam01812      | 5-FTHF_cyc-lig                                                        | 9.80E-34 |
| 2558669603 | DRAFT_00271 | EC:6.3.3.2     | 5-formyltetrahydrofolate cyclo-ligase.                                |          |
| 2558669603 | DRAFT_00271 | TIGR02727      | 5,10-methenyltetrahydrofolate synthetase                              | 1.50E-45 |
| 2558669603 | DRAFT_00271 | KO:K01934      | 5-formyltetrahydrofolate cyclo-ligase [EC:6.3.3.2]                    | 2.80E-29 |
| 2558669603 | DRAFT_00271 | ITERM:05520    | 5-formyltetrahydrofolate cyclo-ligase                                 |          |
| 2558669603 | DRAFT_00271 | Locus_type     | CDS                                                                   |          |
| 2558669603 | DRAFT_00271 | Product_name   | 5-formyltetrahydrofolate cyclo-ligase                                 |          |
| 2558669603 | DRAFT_00271 | Scaffold       | DRAFT_contig_70_22_len_70082_read_count_1249074.3                     |          |
| 2558669603 | DRAFT_00271 | Coordinates    | 20970..21551(-)                                                       |          |
| 2558669603 | DRAFT_00271 | DNA_length     | 582bp                                                                 |          |
| 2558669603 | DRAFT_00271 | Protein_length | 193aa                                                                 |          |
| 2558669603 | DRAFT_00271 | GC             |                                                                       | 0.62     |
| 2558669604 | DRAFT_00272 | KEGG_module    | M00140: C1-unit interconversion, prokaryotes                          |          |
| 2558669604 | DRAFT_00272 | KEGG_module    | M00377: Reductive acetyl-CoA pathway (Wood-Ljungdahl pathway)         |          |
| 2558669604 | DRAFT_00272 | Metacyc        | PWY-6613: tetrahydrofolate salvage from 5,10-methenyltetrahydrofolate |          |

|            |             |                |                                                                       |           |
|------------|-------------|----------------|-----------------------------------------------------------------------|-----------|
| 2558669604 | DRAFT_00272 | Metacyc        | 1CMET2-PWY: formylTHF biosynthesis I                                  |           |
| 2558669604 | DRAFT_00272 | Metacyc        | PWY-2201: folate transformations I                                    |           |
| 2558669604 | DRAFT_00272 | Metacyc        | PWY-5497: purine nucleobases degradation II (anaerobic)               |           |
| 2558669604 | DRAFT_00272 | Metacyc        | PWY-5030: histidine degradation III                                   |           |
| 2558669604 | DRAFT_00272 | Metacyc        | PWY-3841: folate transformations II                                   |           |
| 2558669604 | DRAFT_00272 | Metacyc        | P164-PWY: purine nucleobases degradation I (anaerobic)                |           |
| 2558669604 | DRAFT_00272 | Metacyc        | CODH-PWY: reductive acetyl coenzyme A pathway                         |           |
| 2558669604 | DRAFT_00272 | Metacyc        | PWY-1722: formaldehyde oxidation V (tetrahydrofolate pathway)         |           |
| 2558669604 | DRAFT_00272 | COG_category   | [H] Coenzyme transport and metabolism                                 |           |
| 2558669604 | DRAFT_00272 | COG0190        | 5,10-methylene-tetrahydrofolate dehydrogenase/Methenyl tetrahydrof    | 3.00E-102 |
| 2558669604 | DRAFT_00272 | pfam00763      | THF_DHG_CYH                                                           | 4.90E-39  |
| 2558669604 | DRAFT_00272 | pfam02882      | THF_DHG_CYH_C                                                         | 8.00E-64  |
| 2558669604 | DRAFT_00272 | EC:1.5.1.5     | Methylenetetrahydrofolate dehydrogenase (NADP(+)).                    |           |
| 2558669604 | DRAFT_00272 | EC:3.5.4.9     | Methenyltetrahydrofolate cyclohydrolase.                              |           |
| 2558669604 | DRAFT_00272 | KO:K01491      | methylenetetrahydrofolate dehydrogenase (NADP+) / methenyltetrahy     | 0.00E+00  |
| 2558669604 | DRAFT_00272 | Locus_type     | CDS                                                                   |           |
| 2558669604 | DRAFT_00272 | Product_name   | 5,10-methylene-tetrahydrofolate dehydrogenase/Methenyl tetrahydrof    |           |
| 2558669604 | DRAFT_00272 | Scaffold       | DRAFT_contig_70_22_len_70082_read_count_1249074.3                     |           |
| 2558669604 | DRAFT_00272 | Coordinates    | 21548..22426(-)                                                       |           |
| 2558669604 | DRAFT_00272 | DNA_length     | 879bp                                                                 |           |
| 2558669604 | DRAFT_00272 | Protein_length | 292aa                                                                 |           |
| 2558669604 | DRAFT_00272 | GC             |                                                                       | 0.58      |
| 2558669605 | DRAFT_00273 | KEGG_module    | M00048: Inosine monophosphate biosynthesis, PRPP + glutamine => IMP   |           |
| 2558669605 | DRAFT_00273 | Metacyc        | PWY-6613: tetrahydrofolate salvage from 5,10-methenyltetrahydrofolate |           |
| 2558669605 | DRAFT_00273 | Metacyc        | PWY-6121: 5-aminoimidazole ribonucleotide biosynthesis I              |           |
| 2558669605 | DRAFT_00273 | IMG_pathway    | 1031: Tetrahydrofolate salvage from 5,10-methylenetetrahydrofolate    |           |
| 2558669605 | DRAFT_00273 | IMG_pathway    | 297: 5-amino-1-(5-phospho-D-ribosyl)imidazole synthesis               |           |
| 2558669605 | DRAFT_00273 | COG_category   | [F] Nucleotide transport and metabolism                               |           |
| 2558669605 | DRAFT_00273 | COG0299        | Folate-dependent phosphoribosylglycinamide formyltransferase PurN     | 5.00E-52  |
| 2558669605 | DRAFT_00273 | pfam00551      | Formyl_trans_N                                                        | 1.40E-40  |
| 2558669605 | DRAFT_00273 | EC:2.1.2.2     | Phosphoribosylglycinamide formyltransferase.                          |           |
| 2558669605 | DRAFT_00273 | TIGR00639      | phosphoribosylglycinamide formyltransferase, formyltetrahydrofolate-  | 1.10E-57  |
| 2558669605 | DRAFT_00273 | KO:K11175      | phosphoribosylglycinamide formyltransferase 1 [EC:2.1.2.2]            | 0.00E+00  |



|            |             |                |                                                                                           |           |
|------------|-------------|----------------|-------------------------------------------------------------------------------------------|-----------|
| 2558669605 | DRAFT_00273 | ITERM:01296    | formyltetrahydrofolate-dependent phosphoribosylglycinamide formyltransferase (EC 2.1.2.2) |           |
| 2558669605 | DRAFT_00273 | Locus_type     | CDS                                                                                       |           |
| 2558669605 | DRAFT_00273 | Product_name   | formyltetrahydrofolate-dependent phosphoribosylglycinamide formy                          |           |
| 2558669605 | DRAFT_00273 | Scaffold       | DRAFT_contig_70_22_len_70082_read_count_1249074.3                                         |           |
| 2558669605 | DRAFT_00273 | Coordinates    | 22423..22947(-)                                                                           |           |
| 2558669605 | DRAFT_00273 | DNA_length     | 525bp                                                                                     |           |
| 2558669605 | DRAFT_00273 | Protein_length | 174aa                                                                                     |           |
| 2558669605 | DRAFT_00273 | GC             |                                                                                           | 0.6       |
| 2558669606 | DRAFT_00274 | KEGG_module    | M00048: Inosine monophosphate biosynthesis, PRPP + glutamine => IMP                       |           |
| 2558669606 | DRAFT_00274 | Metacyc        | PWY-6121: 5-aminoimidazole ribonucleotide biosynthesis I                                  |           |
| 2558669606 | DRAFT_00274 | Metacyc        | PWY-6122: 5-aminoimidazole ribonucleotide biosynthesis II                                 |           |
| 2558669606 | DRAFT_00274 | Metacyc        | PWY-6277: superpathway of 5-aminoimidazole ribonucleotide biosynthesis                    |           |
| 2558669606 | DRAFT_00274 | IMG_pathway    | 297: 5-amino-1-(5-phospho-D-ribosyl)imidazole synthesis                                   |           |
| 2558669606 | DRAFT_00274 | COG_category   | [F] Nucleotide transport and metabolism                                                   |           |
| 2558669606 | DRAFT_00274 | COG0034        | Glutamine phosphoribosylpyrophosphate amidotransferase                                    | 0.00E+00  |
| 2558669606 | DRAFT_00274 | pfam00156      | Pribosyltran                                                                              | 3.30E-12  |
| 2558669606 | DRAFT_00274 | pfam13522      | GATase_6                                                                                  | 3.70E-13  |
| 2558669606 | DRAFT_00274 | EC:2.4.2.14    | Amidophosphoribosyltransferase.                                                           |           |
| 2558669606 | DRAFT_00274 | TIGR01134      | amidophosphoribosyltransferase                                                            | 4.10E-113 |
| 2558669606 | DRAFT_00274 | KO:K00764      | amidophosphoribosyltransferase [EC:2.4.2.14]                                              | 0.00E+00  |
| 2558669606 | DRAFT_00274 | ITERM:01274    | amidophosphoribosyltransferase (EC 2.4.2.14)                                              |           |
| 2558669606 | DRAFT_00274 | Locus_type     | CDS                                                                                       |           |
| 2558669606 | DRAFT_00274 | Product_name   | amidophosphoribosyltransferase (EC 2.4.2.14)                                              |           |
| 2558669606 | DRAFT_00274 | Scaffold       | DRAFT_contig_70_22_len_70082_read_count_1249074.3                                         |           |
| 2558669606 | DRAFT_00274 | Coordinates    | 23042..24481(-)                                                                           |           |
| 2558669606 | DRAFT_00274 | DNA_length     | 1440bp                                                                                    |           |
| 2558669606 | DRAFT_00274 | Protein_length | 479aa                                                                                     |           |
| 2558669606 | DRAFT_00274 | GC             |                                                                                           | 0.6       |
| 2558669607 | DRAFT_00275 | KEGG_module    | M00048: Inosine monophosphate biosynthesis, PRPP + glutamine => IMP                       |           |
| 2558669607 | DRAFT_00275 | Metacyc        | PWY-6121: 5-aminoimidazole ribonucleotide biosynthesis I                                  |           |
| 2558669607 | DRAFT_00275 | Metacyc        | PWY-6122: 5-aminoimidazole ribonucleotide biosynthesis II                                 |           |
| 2558669607 | DRAFT_00275 | Metacyc        | PWY-6277: superpathway of 5-aminoimidazole ribonucleotide biosynthesis                    |           |

|            |             |                |                                                                        |           |
|------------|-------------|----------------|------------------------------------------------------------------------|-----------|
| 2558669607 | DRAFT_00275 | COG_category   | [F] Nucleotide transport and metabolism                                |           |
| 2558669607 | DRAFT_00275 | COG0046        | Phosphoribosylformylglycinamide (FGAM) synthase, synthetase dom        | 0.00E+00  |
| 2558669607 | DRAFT_00275 | pfam00586      | AIRS                                                                   | 5.30E-15  |
| 2558669607 | DRAFT_00275 | pfam00586      | AIRS                                                                   | 6.30E-23  |
| 2558669607 | DRAFT_00275 | pfam02769      | AIRS_C                                                                 | 2.20E-26  |
| 2558669607 | DRAFT_00275 | pfam02769      | AIRS_C                                                                 | 6.20E-17  |
| 2558669607 | DRAFT_00275 | EC:6.3.5.3     | Phosphoribosylformylglycinamide synthase.                              |           |
| 2558669607 | DRAFT_00275 | TIGR01736      | phosphoribosylformylglycinamide synthase II                            | 0.00E+00  |
| 2558669607 | DRAFT_00275 | KO:K01952      | phosphoribosylformylglycinamide synthase [EC:6.3.5.3]                  | 0.00E+00  |
| 2558669607 | DRAFT_00275 | Locus_type     | CDS                                                                    |           |
| 2558669607 | DRAFT_00275 | Product_name   | phosphoribosylformylglycinamide synthase II                            |           |
| 2558669607 | DRAFT_00275 | Scaffold       | DRAFT_contig_70_22_len_70082_read_count_1249074.3                      |           |
| 2558669607 | DRAFT_00275 | Coordinates    | 24478..26673(-)                                                        |           |
| 2558669607 | DRAFT_00275 | DNA_length     | 2196bp                                                                 |           |
| 2558669607 | DRAFT_00275 | Protein_length | 731aa                                                                  |           |
| 2558669607 | DRAFT_00275 | GC             |                                                                        | 0.61      |
| 2558669608 | DRAFT_00276 | KEGG_module    | M00048: Inosine monophosphate biosynthesis, PRPP + glutamine => IMP    |           |
| 2558669608 | DRAFT_00276 | Metacyc        | PWY-6277: superpathway of 5-aminoimidazole ribonucleotide biosynthesis |           |
| 2558669608 | DRAFT_00276 | Metacyc        | PWY-6122: 5-aminoimidazole ribonucleotide biosynthesis II              |           |
| 2558669608 | DRAFT_00276 | Metacyc        | PWY-6121: 5-aminoimidazole ribonucleotide biosynthesis I               |           |
| 2558669608 | DRAFT_00276 | COG_category   | [F] Nucleotide transport and metabolism                                |           |
| 2558669608 | DRAFT_00276 | COG0047        | Phosphoribosylformylglycinamide (FGAM) synthase, glutamine amidc       | 5.00E-85  |
| 2558669608 | DRAFT_00276 | pfam13507      | GATase_5                                                               | 1.10E-50  |
| 2558669608 | DRAFT_00276 | EC:6.3.5.3     | Phosphoribosylformylglycinamide synthase.                              |           |
| 2558669608 | DRAFT_00276 | TIGR01737      | phosphoribosylformylglycinamide synthase I                             | 9.60E-100 |
| 2558669608 | DRAFT_00276 | KO:K01952      | phosphoribosylformylglycinamide synthase [EC:6.3.5.3]                  | 0.00E+00  |
| 2558669608 | DRAFT_00276 | ITERM:05311    | phosphoribosylformylglycinamide synthase subunit I (EC 6.3.5.3)        |           |
| 2558669608 | DRAFT_00276 | Locus_type     | CDS                                                                    |           |
| 2558669608 | DRAFT_00276 | Product_name   | phosphoribosylformylglycinamide synthase subunit I (EC 6.3.5.3)        |           |
| 2558669608 | DRAFT_00276 | Scaffold       | DRAFT_contig_70_22_len_70082_read_count_1249074.3                      |           |
| 2558669608 | DRAFT_00276 | Coordinates    | 26675..27385(-)                                                        |           |
| 2558669608 | DRAFT_00276 | DNA_length     | 711bp                                                                  |           |
| 2558669608 | DRAFT_00276 | Protein_length | 236aa                                                                  |           |

|            |             |                |                                                                        |          |
|------------|-------------|----------------|------------------------------------------------------------------------|----------|
| 2558669608 | DRAFT_00276 | GC             |                                                                        | 0.59     |
| 2558669609 | DRAFT_00277 | KEGG_module    | M00048: Inosine monophosphate biosynthesis, PRPP + glutamine => IMP    |          |
| 2558669609 | DRAFT_00277 | Metacyc        | PWY-6277: superpathway of 5-aminoimidazole ribonucleotide biosynthesis |          |
| 2558669609 | DRAFT_00277 | Metacyc        | PWY-6121: 5-aminoimidazole ribonucleotide biosynthesis I               |          |
| 2558669609 | DRAFT_00277 | Metacyc        | PWY-6122: 5-aminoimidazole ribonucleotide biosynthesis II              |          |
| 2558669609 | DRAFT_00277 | COG_category   | [F] Nucleotide transport and metabolism                                |          |
| 2558669609 | DRAFT_00277 | COG1828        | Phosphoribosylformylglycinamide (FGAM) synthase, PurS component        | 7.00E-12 |
| 2558669609 | DRAFT_00277 | pfam02700      | PurS                                                                   | 3.60E-17 |
| 2558669609 | DRAFT_00277 | EC:6.3.5.3     | Phosphoribosylformylglycinamide synthase.                              |          |
| 2558669609 | DRAFT_00277 | TIGR00302      | phosphoribosylformylglycinamide synthase, purS protein                 | 1.50E-17 |
| 2558669609 | DRAFT_00277 | KO:K01952      | phosphoribosylformylglycinamide synthase [EC:6.3.5.3]                  | 9.70E-15 |
| 2558669609 | DRAFT_00277 | Locus_type     | CDS                                                                    |          |
| 2558669609 | DRAFT_00277 | Product_name   | phosphoribosylformylglycinamide synthase, purS protein                 |          |
| 2558669609 | DRAFT_00277 | Scaffold       | DRAFT_contig_70_22_len_70082_read_count_1249074.3                      |          |
| 2558669609 | DRAFT_00277 | Coordinates    | 27382..27642(-)                                                        |          |
| 2558669609 | DRAFT_00277 | DNA_length     | 261bp                                                                  |          |
| 2558669609 | DRAFT_00277 | Protein_length | 86aa                                                                   |          |
| 2558669609 | DRAFT_00277 | GC             |                                                                        | 0.56     |
| 2558669610 | DRAFT_00278 | KEGG_module    | M00048: Inosine monophosphate biosynthesis, PRPP + glutamine => IMP    |          |
| 2558669610 | DRAFT_00278 | Metacyc        | PWY-6123: inosine-5'-phosphate biosynthesis I                          |          |
| 2558669610 | DRAFT_00278 | Metacyc        | PWY-6124: inosine-5'-phosphate biosynthesis II                         |          |
| 2558669610 | DRAFT_00278 | COG_category   | [F] Nucleotide transport and metabolism                                |          |
| 2558669610 | DRAFT_00278 | COG0138        | AICAR transformylase/IMP cyclohydrolase PurH (only IMP cyclohydrola    | 0.00E+00 |
| 2558669610 | DRAFT_00278 | pfam02142      | MGS                                                                    | 7.40E-18 |
| 2558669610 | DRAFT_00278 | pfam01808      | AICARFT_IMPCHas                                                        | 1.40E-65 |
| 2558669610 | DRAFT_00278 | EC:2.1.2.3     | Phosphoribosylaminoimidazolecarboxamide formyltransferase.             |          |
| 2558669610 | DRAFT_00278 | EC:3.5.4.10    | IMP cyclohydrolase.                                                    |          |
| 2558669610 | DRAFT_00278 | KO:K00602      | phosphoribosylaminoimidazolecarboxamide formyltransferase / IMP c      | 0.00E+00 |
| 2558669610 | DRAFT_00278 | Locus_type     | CDS                                                                    |          |
| 2558669610 | DRAFT_00278 | Product_name   | AICAR transformylase/IMP cyclohydrolase PurH (only IMP cyclohydro      |          |
| 2558669610 | DRAFT_00278 | Scaffold       | DRAFT_contig_70_22_len_70082_read_count_1249074.3                      |          |
| 2558669610 | DRAFT_00278 | Coordinates    | 27706..29352(+)                                                        |          |

|            |             |                |                                                                        |          |
|------------|-------------|----------------|------------------------------------------------------------------------|----------|
| 2558669610 | DRAFT_00278 | DNA_length     | 1647bp                                                                 |          |
| 2558669610 | DRAFT_00278 | Protein_length | 548aa                                                                  |          |
| 2558669610 | DRAFT_00278 | GC             |                                                                        | 0.58     |
| 2558669611 | DRAFT_00279 | KEGG_module    | M00048: Inosine monophosphate biosynthesis, PRPP + glutamine => IMP    |          |
| 2558669611 | DRAFT_00279 | Metacyc        | PWY-6121: 5-aminoimidazole ribonucleotide biosynthesis I               |          |
| 2558669611 | DRAFT_00279 | Metacyc        | PWY-6277: superpathway of 5-aminoimidazole ribonucleotide biosynthesis |          |
| 2558669611 | DRAFT_00279 | Metacyc        | PWY-6122: 5-aminoimidazole ribonucleotide biosynthesis II              |          |
| 2558669611 | DRAFT_00279 | IMG_pathway    | 297: 5-amino-1-(5-phospho-D-ribosyl)imidazole synthesis                |          |
| 2558669611 | DRAFT_00279 | COG_category   | [F] Nucleotide transport and metabolism                                |          |
| 2558669611 | DRAFT_00279 | COG0151        | Phosphoribosylamine-glycine ligase                                     | 1.00E-45 |
| 2558669611 | DRAFT_00279 | pfam01071      | GARS_A                                                                 | 1.40E-22 |
| 2558669611 | DRAFT_00279 | EC:6.3.4.13    | Phosphoribosylamine--glycine ligase.                                   |          |
| 2558669611 | DRAFT_00279 | KO:K01945      | phosphoribosylamine--glycine ligase [EC:6.3.4.13]                      | 0.00E+00 |
| 2558669611 | DRAFT_00279 | ITERM:01300    | phosphoribosylamine--glycine ligase (EC 6.3.4.13)                      |          |
| 2558669611 | DRAFT_00279 | Locus_type     | CDS                                                                    |          |
| 2558669611 | DRAFT_00279 | Product_name   | phosphoribosylamine--glycine ligase (EC 6.3.4.13)                      |          |
| 2558669611 | DRAFT_00279 | Scaffold       | DRAFT_contig_70_22_len_70082_read_count_1249074.3                      |          |
| 2558669611 | DRAFT_00279 | Coordinates    | 29349..30743(-)                                                        |          |
| 2558669611 | DRAFT_00279 | DNA_length     | 1395bp                                                                 |          |
| 2558669611 | DRAFT_00279 | Protein_length | 464aa                                                                  |          |
| 2558669611 | DRAFT_00279 | GC             |                                                                        | 0.58     |
| 2558669612 | DRAFT_00280 | Locus_type     | CDS                                                                    |          |
| 2558669612 | DRAFT_00280 | Product_name   | hypothetical protein                                                   |          |
| 2558669612 | DRAFT_00280 | Scaffold       | DRAFT_contig_70_22_len_70082_read_count_1249074.3                      |          |
| 2558669612 | DRAFT_00280 | Coordinates    | 31062..31298(-)                                                        |          |
| 2558669612 | DRAFT_00280 | DNA_length     | 237bp                                                                  |          |
| 2558669612 | DRAFT_00280 | Protein_length | 78aa                                                                   |          |
| 2558669612 | DRAFT_00280 | GC             |                                                                        | 0.56     |
| 2558669613 | DRAFT_00281 | Locus_type     | CDS                                                                    |          |
| 2558669613 | DRAFT_00281 | Product_name   | hypothetical protein                                                   |          |
| 2558669613 | DRAFT_00281 | Scaffold       | DRAFT_contig_70_22_len_70082_read_count_1249074.3                      |          |

|            |             |                |                                                                            |          |
|------------|-------------|----------------|----------------------------------------------------------------------------|----------|
| 2558669613 | DRAFT_00281 | Coordinates    | 31285..31434(-)                                                            |          |
| 2558669613 | DRAFT_00281 | DNA_length     | 150bp                                                                      |          |
| 2558669613 | DRAFT_00281 | Protein_length | 49aa                                                                       |          |
| 2558669613 | DRAFT_00281 | GC             |                                                                            | 0.52     |
| 2558669614 | DRAFT_00282 | COG_category   | [O] Posttranslational modification, protein turnover, chaperones           |          |
| 2558669614 | DRAFT_00282 | COG0265        | Trypsin-like serine proteases, typically periplasmic, contain C-terminal I | 9.00E-46 |
| 2558669614 | DRAFT_00282 | pfam13365      | Trypsin_2                                                                  | 7.60E-18 |
| 2558669614 | DRAFT_00282 | pfam13180      | PDZ_2                                                                      | 1.50E-14 |
| 2558669614 | DRAFT_00282 | EC:1.3.1.74    | 2-alkenal reductase.                                                       |          |
| 2558669614 | DRAFT_00282 | KO:K08070      | 2-alkenal reductase [EC:1.3.1.74]                                          | 0.00E+00 |
| 2558669614 | DRAFT_00282 | Locus_type     | CDS                                                                        |          |
| 2558669614 | DRAFT_00282 | Product_name   | Trypsin-like serine proteases, typically periplasmic, contain C-termina    |          |
| 2558669614 | DRAFT_00282 | Scaffold       | DRAFT_contig_70_22_len_70082_read_count_1249074.3                          |          |
| 2558669614 | DRAFT_00282 | Coordinates    | 31492..32715(+)                                                            |          |
| 2558669614 | DRAFT_00282 | DNA_length     | 1224bp                                                                     |          |
| 2558669614 | DRAFT_00282 | Protein_length | 407aa                                                                      |          |
| 2558669614 | DRAFT_00282 | GC             |                                                                            | 0.55     |
| 2558669614 | DRAFT_00282 | Transmembrane  | Yes                                                                        |          |
| 2558669615 | DRAFT_00283 | pfam01022      | HTH_5                                                                      | 3.00E-09 |
| 2558669615 | DRAFT_00283 | Locus_type     | CDS                                                                        |          |
| 2558669615 | DRAFT_00283 | Product_name   | transcriptional regulator, ArsR family                                     |          |
| 2558669615 | DRAFT_00283 | Scaffold       | DRAFT_contig_70_22_len_70082_read_count_1249074.3                          |          |
| 2558669615 | DRAFT_00283 | Coordinates    | 32839..33147(+)                                                            |          |
| 2558669615 | DRAFT_00283 | DNA_length     | 309bp                                                                      |          |
| 2558669615 | DRAFT_00283 | Protein_length | 102aa                                                                      |          |
| 2558669615 | DRAFT_00283 | GC             |                                                                            | 0.56     |
| 2558669616 | DRAFT_00284 | Locus_type     | CDS                                                                        |          |
| 2558669616 | DRAFT_00284 | Product_name   | hypothetical protein                                                       |          |
| 2558669616 | DRAFT_00284 | Scaffold       | DRAFT_contig_70_22_len_70082_read_count_1249074.3                          |          |
| 2558669616 | DRAFT_00284 | Coordinates    | 33144..33620(+)                                                            |          |
| 2558669616 | DRAFT_00284 | DNA_length     | 477bp                                                                      |          |

|            |             |                |                                                                                                  |          |
|------------|-------------|----------------|--------------------------------------------------------------------------------------------------|----------|
| 2558669616 | DRAFT_00284 | Protein_length | 158aa                                                                                            |          |
| 2558669616 | DRAFT_00284 | GC             |                                                                                                  | 0.55     |
| 2558669616 | DRAFT_00284 | Transmembrane  | Yes                                                                                              |          |
| 2558669617 | DRAFT_00285 | Metacyc        | PWY-2301: <i>myo</i>-inositol biosynthesis                                                       |          |
| 2558669617 | DRAFT_00285 | Metacyc        | PWY-6580: L-1-phosphatidyl-inositol biosynthesis (Mycobacteria)                                  |          |
| 2558669617 | DRAFT_00285 | Metacyc        | PWY1G-0: mycothiol biosynthesis                                                                  |          |
| 2558669617 | DRAFT_00285 | Metacyc        | PWY-6372: 1D-<i>myo</i>-inositol hexakisphosphate biosynthesis IV (<i>Dictyostelium</i>)         |          |
| 2558669617 | DRAFT_00285 | Metacyc        | PWY-6664: di-myo-inositol phosphate biosynthesis                                                 |          |
| 2558669617 | DRAFT_00285 | Metacyc        | PWY-4661: 1D-<i>myo</i>-inositol hexakisphosphate biosynthesis III (<i>Spirodela polyrrhiza</i>) |          |
| 2558669617 | DRAFT_00285 | COG_category   | [L] Lipid transport and metabolism                                                               |          |
| 2558669617 | DRAFT_00285 | COG1260        | Myo-inositol-1-phosphate synthase                                                                | 2.00E-64 |
| 2558669617 | DRAFT_00285 | pfam07994      | NAD_binding_5                                                                                    | 1.60E-27 |
| 2558669617 | DRAFT_00285 | pfam01658      | Inos-1-P_synth                                                                                   | 4.40E-11 |
| 2558669617 | DRAFT_00285 | EC:5.5.1.4     | Inositol-3-phosphate synthase.                                                                   |          |
| 2558669617 | DRAFT_00285 | KO:K01858      | myo-inositol-1-phosphate synthase [EC:5.5.1.4]                                                   | 0.00E+00 |
| 2558669617 | DRAFT_00285 | Locus_type     | CDS                                                                                              |          |
| 2558669617 | DRAFT_00285 | Product_name   | Myo-inositol-1-phosphate synthase                                                                |          |
| 2558669617 | DRAFT_00285 | Scaffold       | DRAFT_contig_70_22_len_70082_read_count_1249074.3                                                |          |
| 2558669617 | DRAFT_00285 | Coordinates    | 33826..34866(-)                                                                                  |          |
| 2558669617 | DRAFT_00285 | DNA_length     | 1041bp                                                                                           |          |
| 2558669617 | DRAFT_00285 | Protein_length | 346aa                                                                                            |          |
| 2558669617 | DRAFT_00285 | GC             |                                                                                                  | 0.57     |
| 2558669618 | DRAFT_00286 | Locus_type     | CDS                                                                                              |          |
| 2558669618 | DRAFT_00286 | Product_name   | hypothetical protein                                                                             |          |
| 2558669618 | DRAFT_00286 | Scaffold       | DRAFT_contig_70_22_len_70082_read_count_1249074.3                                                |          |
| 2558669618 | DRAFT_00286 | Coordinates    | 34872..35075(-)                                                                                  |          |
| 2558669618 | DRAFT_00286 | DNA_length     | 204bp                                                                                            |          |
| 2558669618 | DRAFT_00286 | Protein_length | 67aa                                                                                             |          |
| 2558669618 | DRAFT_00286 | GC             |                                                                                                  | 0.54     |
| 2558669618 | DRAFT_00286 | Transmembrane  | Yes                                                                                              |          |
| 2558669619 | DRAFT_00287 | COG_category   | [L] Replication, recombination and repair                                                        |          |

|            |             |                |                                                     |           |
|------------|-------------|----------------|-----------------------------------------------------|-----------|
| 2558669619 | DRAFT_00287 | COG1697        | DNA topoisomerase VI, subunit A                     | 2.00E-83  |
| 2558669619 | DRAFT_00287 | pfam04406      | TP6A_N                                              | 1.00E-16  |
| 2558669619 | DRAFT_00287 | EC:5.99.1.3    | DNA topoisomerase (ATP-hydrolyzing).                |           |
| 2558669619 | DRAFT_00287 | KO:K03166      | DNA topoisomerase VI subunit A [EC:5.99.1.3]        | 0.00E+00  |
| 2558669619 | DRAFT_00287 | Locus_type     | CDS                                                 |           |
| 2558669619 | DRAFT_00287 | Product_name   | DNA topoisomerase VI, subunit A                     |           |
| 2558669619 | DRAFT_00287 | Scaffold       | DRAFT_contig_70_22_len_70082_read_count_1249074.3   |           |
| 2558669619 | DRAFT_00287 | Coordinates    | 35350..36447(-)                                     |           |
| 2558669619 | DRAFT_00287 | DNA_length     | 1098bp                                              |           |
| 2558669619 | DRAFT_00287 | Protein_length | 365aa                                               |           |
| 2558669619 | DRAFT_00287 | GC             |                                                     | 0.56      |
| 2558669620 | DRAFT_00288 | COG_category   | [L] Replication, recombination and repair           |           |
| 2558669620 | DRAFT_00288 | COG1389        | DNA topoisomerase VI, subunit B                     | 6.00E-127 |
| 2558669620 | DRAFT_00288 | pfam13589      | HATPase_c_3                                         | 1.90E-07  |
| 2558669620 | DRAFT_00288 | pfam09239      | Topo-VIb_trans                                      | 1.10E-54  |
| 2558669620 | DRAFT_00288 | EC:5.99.1.3    | DNA topoisomerase (ATP-hydrolyzing).                |           |
| 2558669620 | DRAFT_00288 | TIGR01052      | DNA topoisomerase VI, B subunit                     | 0.00E+00  |
| 2558669620 | DRAFT_00288 | KO:K03167      | DNA topoisomerase VI subunit B [EC:5.99.1.3]        | 0.00E+00  |
| 2558669620 | DRAFT_00288 | Locus_type     | CDS                                                 |           |
| 2558669620 | DRAFT_00288 | Product_name   | DNA topoisomerase VI, B subunit                     |           |
| 2558669620 | DRAFT_00288 | Scaffold       | DRAFT_contig_70_22_len_70082_read_count_1249074.3   |           |
| 2558669620 | DRAFT_00288 | Coordinates    | 36410..37996(-)                                     |           |
| 2558669620 | DRAFT_00288 | DNA_length     | 1587bp                                              |           |
| 2558669620 | DRAFT_00288 | Protein_length | 528aa                                               |           |
| 2558669620 | DRAFT_00288 | GC             |                                                     | 0.58      |
| 2558669621 | DRAFT_00289 | COG_category   | [R] General function prediction only                |           |
| 2558669621 | DRAFT_00289 | COG1094        | Predicted RNA-binding protein (contains KH domains) | 1.00E-41  |
| 2558669621 | DRAFT_00289 | pfam00013      | KH_1                                                | 3.00E-08  |
| 2558669621 | DRAFT_00289 | pfam00013      | KH_1                                                | 2.00E-04  |
| 2558669621 | DRAFT_00289 | TIGR03665      | arCOG04150 universal archaeal KH domain protein     | 2.30E-59  |
| 2558669621 | DRAFT_00289 | KO:K06961      | ribosomal RNA assembly protein                      | 0.00E+00  |
| 2558669621 | DRAFT_00289 | Locus_type     | CDS                                                 |           |

|            |             |                |                                                                  |          |
|------------|-------------|----------------|------------------------------------------------------------------|----------|
| 2558669621 | DRAFT_00289 | Product_name   | arCOG04150 universal archaeal KH domain protein                  |          |
| 2558669621 | DRAFT_00289 | Scaffold       | DRAFT_contig_70_22_len_70082_read_count_1249074.3                |          |
| 2558669621 | DRAFT_00289 | Coordinates    | 38200..38799(-)                                                  |          |
| 2558669621 | DRAFT_00289 | DNA_length     | 600bp                                                            |          |
| 2558669621 | DRAFT_00289 | Protein_length | 199aa                                                            |          |
| 2558669621 | DRAFT_00289 | GC             |                                                                  | 0.59     |
|            |             |                |                                                                  |          |
| 2558669622 | DRAFT_00290 | COG_category   | [T] Signal transduction mechanisms                               |          |
| 2558669622 | DRAFT_00290 | COG_category   | [D] Cell cycle control, cell division, chromosome partitioning   |          |
| 2558669622 | DRAFT_00290 | COG1718        | Serine/threonine protein kinase involved in cell cycle control   | 1.00E-60 |
| 2558669622 | DRAFT_00290 | pfam01163      | RIO1                                                             | 2.40E-49 |
| 2558669622 | DRAFT_00290 | EC:2.7.11.1    | Non-specific serine/threonine protein kinase.                    |          |
| 2558669622 | DRAFT_00290 | KO:K07178      | RIO kinase 1 [EC:2.7.11.1]                                       | 0.00E+00 |
| 2558669622 | DRAFT_00290 | Locus_type     | CDS                                                              |          |
| 2558669622 | DRAFT_00290 | Product_name   | Serine/threonine protein kinase involved in cell cycle control   |          |
| 2558669622 | DRAFT_00290 | Scaffold       | DRAFT_contig_70_22_len_70082_read_count_1249074.3                |          |
| 2558669622 | DRAFT_00290 | Coordinates    | 38796..39590(-)                                                  |          |
| 2558669622 | DRAFT_00290 | DNA_length     | 795bp                                                            |          |
| 2558669622 | DRAFT_00290 | Protein_length | 264aa                                                            |          |
| 2558669622 | DRAFT_00290 | GC             |                                                                  | 0.57     |
|            |             |                |                                                                  |          |
| 2558669623 | DRAFT_00291 | COG_category   | [O] Posttranslational modification, protein turnover, chaperones |          |
| 2558669623 | DRAFT_00291 | COG0576        | Molecular chaperone GrpE (heat shock protein)                    | 2.00E-27 |
| 2558669623 | DRAFT_00291 | pfam01025      | GrpE                                                             | 2.10E-42 |
| 2558669623 | DRAFT_00291 | KO:K03687      | molecular chaperone GrpE                                         | 7.40E-28 |
| 2558669623 | DRAFT_00291 | Locus_type     | CDS                                                              |          |
| 2558669623 | DRAFT_00291 | Product_name   | Molecular chaperone GrpE (heat shock protein)                    |          |
| 2558669623 | DRAFT_00291 | Scaffold       | DRAFT_contig_70_22_len_70082_read_count_1249074.3                |          |
| 2558669623 | DRAFT_00291 | Coordinates    | 39808..40437(+)                                                  |          |
| 2558669623 | DRAFT_00291 | DNA_length     | 630bp                                                            |          |
| 2558669623 | DRAFT_00291 | Protein_length | 209aa                                                            |          |
| 2558669623 | DRAFT_00291 | GC             |                                                                  | 0.57     |
|            |             |                |                                                                  |          |
| 2558669624 | DRAFT_00292 | COG_category   | [O] Posttranslational modification, protein turnover, chaperones |          |



|            |             |                |                                                                  |           |
|------------|-------------|----------------|------------------------------------------------------------------|-----------|
| 2558669624 | DRAFT_00292 | COG0443        | Molecular chaperone                                              | 0.00E+00  |
| 2558669624 | DRAFT_00292 | pfam00012      | HSP70                                                            | 0.00E+00  |
| 2558669624 | DRAFT_00292 | TIGR02350      | chaperone protein DnaK                                           | 0.00E+00  |
| 2558669624 | DRAFT_00292 | KO:K04043      | molecular chaperone DnaK                                         | 0.00E+00  |
| 2558669624 | DRAFT_00292 | Locus_type     | CDS                                                              |           |
| 2558669624 | DRAFT_00292 | Product_name   | Molecular chaperone                                              |           |
| 2558669624 | DRAFT_00292 | Scaffold       | DRAFT_contig_70_22_len_70082_read_count_1249074.3                |           |
| 2558669624 | DRAFT_00292 | Coordinates    | 40430..42277(+)                                                  |           |
| 2558669624 | DRAFT_00292 | DNA_length     | 1848bp                                                           |           |
| 2558669624 | DRAFT_00292 | Protein_length | 615aa                                                            |           |
| 2558669624 | DRAFT_00292 | GC             |                                                                  | 0.6       |
|            |             |                |                                                                  |           |
| 2558669625 | DRAFT_00293 | COG_category   | [O] Posttranslational modification, protein turnover, chaperones |           |
| 2558669625 | DRAFT_00293 | COG0484        | DnaJ-class molecular chaperone with C-terminal Zn finger domain  | 3.00E-110 |
| 2558669625 | DRAFT_00293 | pfam01556      | CTDII                                                            | 9.20E-22  |
| 2558669625 | DRAFT_00293 | pfam00226      | DnaJ                                                             | 1.10E-28  |
| 2558669625 | DRAFT_00293 | pfam00684      | DnaJ_CXXCXGXG                                                    | 3.10E-14  |
| 2558669625 | DRAFT_00293 | TIGR02349      | chaperone protein DnaJ                                           | 8.80E-127 |
| 2558669625 | DRAFT_00293 | KO:K03686      | molecular chaperone DnaJ                                         | 0.00E+00  |
| 2558669625 | DRAFT_00293 | Locus_type     | CDS                                                              |           |
| 2558669625 | DRAFT_00293 | Product_name   | chaperone protein DnaJ                                           |           |
| 2558669625 | DRAFT_00293 | Scaffold       | DRAFT_contig_70_22_len_70082_read_count_1249074.3                |           |
| 2558669625 | DRAFT_00293 | Coordinates    | 42290..43363(+)                                                  |           |
| 2558669625 | DRAFT_00293 | DNA_length     | 1074bp                                                           |           |
| 2558669625 | DRAFT_00293 | Protein_length | 357aa                                                            |           |
| 2558669625 | DRAFT_00293 | GC             |                                                                  | 0.59      |
|            |             |                |                                                                  |           |
| 2558669626 | DRAFT_00294 | COG_category   | [S] Function unknown                                             |           |
| 2558669626 | DRAFT_00294 | COG2412        | Uncharacterized conserved protein                                | 1.00E-15  |
| 2558669626 | DRAFT_00294 | pfam04242      | DUF424                                                           | 2.40E-20  |
| 2558669626 | DRAFT_00294 | KO:K09148      | hypothetical protein                                             | 3.50E-19  |
| 2558669626 | DRAFT_00294 | Locus_type     | CDS                                                              |           |
| 2558669626 | DRAFT_00294 | Product_name   | Uncharacterized conserved protein                                |           |
| 2558669626 | DRAFT_00294 | Scaffold       | DRAFT_contig_70_22_len_70082_read_count_1249074.3                |           |

|            |             |                |                                                                           |          |
|------------|-------------|----------------|---------------------------------------------------------------------------|----------|
| 2558669626 | DRAFT_00294 | Coordinates    | 43360..43671(-)                                                           |          |
| 2558669626 | DRAFT_00294 | DNA_length     | 312bp                                                                     |          |
| 2558669626 | DRAFT_00294 | Protein_length | 103aa                                                                     |          |
| 2558669626 | DRAFT_00294 | GC             |                                                                           | 0.57     |
| 2558669627 | DRAFT_00295 | COG_category   | [J] Translation, ribosomal structure and biogenesis                       |          |
| 2558669627 | DRAFT_00295 | COG1601        | Translation initiation factor 2, beta subunit (eIF-2beta)/eIF-5 N-termina | 2.00E-26 |
| 2558669627 | DRAFT_00295 | pfam01873      | eIF-5_eIF-2B                                                              | 1.90E-28 |
| 2558669627 | DRAFT_00295 | TIGR00311      | translation initiation factor aIF-2, beta subunit, putative               | 5.50E-30 |
| 2558669627 | DRAFT_00295 | KO:K03238      | translation initiation factor 2 subunit 2                                 | 1.40E-36 |
| 2558669627 | DRAFT_00295 | Locus_type     | CDS                                                                       |          |
| 2558669627 | DRAFT_00295 | Product_name   | Translation initiation factor 2, beta subunit (eIF-2beta)/eIF-5 N-termin  |          |
| 2558669627 | DRAFT_00295 | Scaffold       | DRAFT_contig_70_22_len_70082_read_count_1249074.3                         |          |
| 2558669627 | DRAFT_00295 | Coordinates    | 43673..44089(-)                                                           |          |
| 2558669627 | DRAFT_00295 | DNA_length     | 417bp                                                                     |          |
| 2558669627 | DRAFT_00295 | Protein_length | 138aa                                                                     |          |
| 2558669627 | DRAFT_00295 | GC             |                                                                           | 0.59     |
| 2558669628 | DRAFT_00296 | Locus_type     | CDS                                                                       |          |
| 2558669628 | DRAFT_00296 | Product_name   | hypothetical protein                                                      |          |
| 2558669628 | DRAFT_00296 | Scaffold       | DRAFT_contig_70_22_len_70082_read_count_1249074.3                         |          |
| 2558669628 | DRAFT_00296 | Coordinates    | 44190..44381(+)                                                           |          |
| 2558669628 | DRAFT_00296 | DNA_length     | 192bp                                                                     |          |
| 2558669628 | DRAFT_00296 | Protein_length | 63aa                                                                      |          |
| 2558669628 | DRAFT_00296 | GC             |                                                                           | 0.56     |
| 2558669629 | DRAFT_00297 | KEGG_module    | M00034: Methionine salvage pathway                                        |          |
| 2558669629 | DRAFT_00297 | Metacyc        | PWY-6756: <i>S</i>-methyl-5'-thioadenosine degradation II                 |          |
| 2558669629 | DRAFT_00297 | COG_category   | [F] Nucleotide transport and metabolism                                   |          |
| 2558669629 | DRAFT_00297 | COG0005        | Purine nucleoside phosphorylase                                           | 8.00E-68 |
| 2558669629 | DRAFT_00297 | pfam01048      | PNP_UDP_1                                                                 | 1.20E-40 |
| 2558669629 | DRAFT_00297 | EC:2.4.2.28    | S-methyl-5'-thioadenosine phosphorylase.                                  |          |
| 2558669629 | DRAFT_00297 | TIGR01694      | 5'-deoxy-5'-methylthioadenosine phosphorylase                             | 2.00E-88 |
| 2558669629 | DRAFT_00297 | KO:K00772      | 5'-methylthioadenosine phosphorylase [EC:2.4.2.28]                        | 0.00E+00 |

|            |             |                |                                                                     |          |
|------------|-------------|----------------|---------------------------------------------------------------------|----------|
| 2558669629 | DRAFT_00297 | Locus_type     | CDS                                                                 |          |
| 2558669629 | DRAFT_00297 | Product_name   | methythioadenosine phosphorylase (EC 2.4.2.28)                      |          |
| 2558669629 | DRAFT_00297 | Scaffold       | DRAFT_contig_70_22_len_70082_read_count_1249074.3                   |          |
| 2558669629 | DRAFT_00297 | Coordinates    | 44384..45283(+)                                                     |          |
| 2558669629 | DRAFT_00297 | DNA_length     | 900bp                                                               |          |
| 2558669629 | DRAFT_00297 | Protein_length | 299aa                                                               |          |
| 2558669629 | DRAFT_00297 | GC             |                                                                     | 0.59     |
| 2558669630 | DRAFT_00298 | Metacyc        | PWY-6610: adenine and adenosine salvage IV                          |          |
| 2558669630 | DRAFT_00298 | Metacyc        | P121-PWY: adenine and adenosine salvage I                           |          |
| 2558669630 | DRAFT_00298 | Metacyc        | PWY-6605: adenine and adenosine salvage II                          |          |
| 2558669630 | DRAFT_00298 | IMG_pathway    | 479: Adenine conversion to AMP                                      |          |
| 2558669630 | DRAFT_00298 | COG_category   | [F] Nucleotide transport and metabolism                             |          |
| 2558669630 | DRAFT_00298 | COG0503        | Adenine/guanine phosphoribosyltransferases and related PRPP-binding | 1.00E-41 |
| 2558669630 | DRAFT_00298 | pfam00156      | Pribosyltran                                                        | 7.70E-18 |
| 2558669630 | DRAFT_00298 | EC:2.4.2.7     | Adenine phosphoribosyltransferase.                                  |          |
| 2558669630 | DRAFT_00298 | TIGR01090      | adenine phosphoribosyltransferase                                   | 9.60E-64 |
| 2558669630 | DRAFT_00298 | KO:K00759      | adenine phosphoribosyltransferase [EC:2.4.2.7]                      | 0.00E+00 |
| 2558669630 | DRAFT_00298 | ITERM:01830    | adenine phosphoribosyltransferase (EC 2.4.2.7)                      |          |
| 2558669630 | DRAFT_00298 | Locus_type     | CDS                                                                 |          |
| 2558669630 | DRAFT_00298 | Product_name   | adenine phosphoribosyltransferase (EC 2.4.2.7)                      |          |
| 2558669630 | DRAFT_00298 | Scaffold       | DRAFT_contig_70_22_len_70082_read_count_1249074.3                   |          |
| 2558669630 | DRAFT_00298 | Coordinates    | 45283..45819(+)                                                     |          |
| 2558669630 | DRAFT_00298 | DNA_length     | 537bp                                                               |          |
| 2558669630 | DRAFT_00298 | Protein_length | 178aa                                                               |          |
| 2558669630 | DRAFT_00298 | GC             |                                                                     | 0.58     |
| 2558669631 | DRAFT_00299 | KEGG_module    | M00035: Methionine degradation                                      |          |
| 2558669631 | DRAFT_00299 | Metacyc        | METHIONINE-DEG1-PWY: methionine degradation I (to homocysteine)     |          |
| 2558669631 | DRAFT_00299 | Metacyc        | PWY-5041: <i>S</i>-adenosyl-L-methionine cycle II                   |          |
| 2558669631 | DRAFT_00299 | IMG_pathway    | 398: S-adenosyl-L-homocysteine hydrolysis                           |          |
| 2558669631 | DRAFT_00299 | COG_category   | [H] Coenzyme transport and metabolism                               |          |
| 2558669631 | DRAFT_00299 | COG0499        | S-adenosylhomocysteine hydrolase                                    | 0.00E+00 |
| 2558669631 | DRAFT_00299 | pfam00670      | AdoHcyase_NAD                                                       | 4.90E-49 |

|            |             |                |                                                                |          |
|------------|-------------|----------------|----------------------------------------------------------------|----------|
| 2558669631 | DRAFT_00299 | pfam05221      | AdoHcyase                                                      | 4.30E-51 |
| 2558669631 | DRAFT_00299 | EC:3.3.1.1     | Adenosylhomocysteinase.                                        |          |
| 2558669631 | DRAFT_00299 | TIGR00936      | adenosylhomocysteinase                                         | 0.00E+00 |
| 2558669631 | DRAFT_00299 | KO:K01251      | adenosylhomocysteinase [EC:3.3.1.1]                            | 0.00E+00 |
| 2558669631 | DRAFT_00299 | ITERM:01674    | adenosylhomocysteinase (EC 3.3.1.1)                            |          |
| 2558669631 | DRAFT_00299 | Locus_type     | CDS                                                            |          |
| 2558669631 | DRAFT_00299 | Product_name   | adenosylhomocysteinase (EC 3.3.1.1)                            |          |
| 2558669631 | DRAFT_00299 | Scaffold       | DRAFT_contig_70_22_len_70082_read_count_1249074.3              |          |
| 2558669631 | DRAFT_00299 | Coordinates    | 46079..47311(+)                                                |          |
| 2558669631 | DRAFT_00299 | DNA_length     | 1233bp                                                         |          |
| 2558669631 | DRAFT_00299 | Protein_length | 410aa                                                          |          |
| 2558669631 | DRAFT_00299 | GC             |                                                                | 0.59     |
| 2558669632 | DRAFT_00300 | KEGG_module    | M00360: Aminoacyl-tRNA biosynthesis, prokaryotes               |          |
| 2558669632 | DRAFT_00300 | KEGG_module    | M00359: Aminoacyl-tRNA biosynthesis, eukaryotes                |          |
| 2558669632 | DRAFT_00300 | Metacyc        | TRNA-CHARGING-PWY: tRNA charging                               |          |
| 2558669632 | DRAFT_00300 | IMG_pathway    | 498: L-methionine ligation to tRNA(Met)                        |          |
| 2558669632 | DRAFT_00300 | COG_category   | [J] Translation, ribosomal structure and biogenesis            |          |
| 2558669632 | DRAFT_00300 | COG0143        | Methionyl-tRNA synthetase                                      | 0.00E+00 |
| 2558669632 | DRAFT_00300 | pfam08264      | Anticodon_1                                                    | 9.30E-10 |
| 2558669632 | DRAFT_00300 | pfam09334      | tRNA-synt_1g                                                   | 0.00E+00 |
| 2558669632 | DRAFT_00300 | EC:6.1.1.10    | Methionine--tRNA ligase.                                       |          |
| 2558669632 | DRAFT_00300 | TIGR00398      | methionyl-tRNA synthetase                                      | 0.00E+00 |
| 2558669632 | DRAFT_00300 | KO:K01874      | methionyl-tRNA synthetase [EC:6.1.1.10]                        | 0.00E+00 |
| 2558669632 | DRAFT_00300 | ITERM:00402    | methionyl-tRNA synthetase (EC 6.1.1.10)                        |          |
| 2558669632 | DRAFT_00300 | Locus_type     | CDS                                                            |          |
| 2558669632 | DRAFT_00300 | Product_name   | methionyl-tRNA synthetase (EC 6.1.1.10)                        |          |
| 2558669632 | DRAFT_00300 | Scaffold       | DRAFT_contig_70_22_len_70082_read_count_1249074.3              |          |
| 2558669632 | DRAFT_00300 | Coordinates    | 47354..49015(+)                                                |          |
| 2558669632 | DRAFT_00300 | DNA_length     | 1662bp                                                         |          |
| 2558669632 | DRAFT_00300 | Protein_length | 553aa                                                          |          |
| 2558669632 | DRAFT_00300 | GC             |                                                                | 0.56     |
| 2558669633 | DRAFT_00301 | COG_category   | [D] Cell cycle control, cell division, chromosome partitioning |          |

|            |             |                |                                                                       |          |
|------------|-------------|----------------|-----------------------------------------------------------------------|----------|
| 2558669633 | DRAFT_00301 | COG0206        | Cell division GTPase                                                  | 2.00E-22 |
| 2558669633 | DRAFT_00301 | pfam00091      | Tubulin                                                               | 2.10E-16 |
| 2558669633 | DRAFT_00301 | Locus_type     | CDS                                                                   |          |
| 2558669633 | DRAFT_00301 | Product_name   | Cell division GTPase                                                  |          |
| 2558669633 | DRAFT_00301 | Scaffold       | DRAFT_contig_70_22_len_70082_read_count_1249074.3                     |          |
| 2558669633 | DRAFT_00301 | Coordinates    | 49012..50040(-)                                                       |          |
| 2558669633 | DRAFT_00301 | DNA_length     | 1029bp                                                                |          |
| 2558669633 | DRAFT_00301 | Protein_length | 342aa                                                                 |          |
| 2558669633 | DRAFT_00301 | GC             |                                                                       | 0.6      |
| 2558669633 | DRAFT_00301 | Transmembrane  | Yes                                                                   |          |
| 2558669634 | DRAFT_00302 | pfam01883      | DUF59                                                                 | 6.60E-07 |
| 2558669634 | DRAFT_00302 | Locus_type     | CDS                                                                   |          |
| 2558669634 | DRAFT_00302 | Product_name   | Domain of unknown function DUF59                                      |          |
| 2558669634 | DRAFT_00302 | Scaffold       | DRAFT_contig_70_22_len_70082_read_count_1249074.3                     |          |
| 2558669634 | DRAFT_00302 | Coordinates    | 50151..50465(-)                                                       |          |
| 2558669634 | DRAFT_00302 | DNA_length     | 315bp                                                                 |          |
| 2558669634 | DRAFT_00302 | Protein_length | 104aa                                                                 |          |
| 2558669634 | DRAFT_00302 | GC             |                                                                       | 0.58     |
| 2558669635 | DRAFT_00303 | Metacyc        | GLYCLEAV-PWY: glycine cleavage                                        |          |
| 2558669635 | DRAFT_00303 | COG_category   | [E] Amino acid transport and metabolism                               |          |
| 2558669635 | DRAFT_00303 | COG1003        | Glycine cleavage system protein P (pyridoxal-binding), C-terminal dom | 0.00E+00 |
| 2558669635 | DRAFT_00303 | pfam02347      | GDC-P                                                                 | 8.20E-14 |
| 2558669635 | DRAFT_00303 | EC:1.4.4.2     | Glycine dehydrogenase (decarboxylating).                              |          |
| 2558669635 | DRAFT_00303 | KO:K00283      | glycine dehydrogenase subunit 2 [EC:1.4.4.2]                          | 0.00E+00 |
| 2558669635 | DRAFT_00303 | Locus_type     | CDS                                                                   |          |
| 2558669635 | DRAFT_00303 | Product_name   | glycine dehydrogenase (decarboxylating) beta subunit (EC 1.4.4.2)     |          |
| 2558669635 | DRAFT_00303 | Scaffold       | DRAFT_contig_70_22_len_70082_read_count_1249074.3                     |          |
| 2558669635 | DRAFT_00303 | Coordinates    | 50509..51987(-)                                                       |          |
| 2558669635 | DRAFT_00303 | DNA_length     | 1479bp                                                                |          |
| 2558669635 | DRAFT_00303 | Protein_length | 492aa                                                                 |          |
| 2558669635 | DRAFT_00303 | GC             |                                                                       | 0.6      |

|            |             |                |                                                                        |           |
|------------|-------------|----------------|------------------------------------------------------------------------|-----------|
| 2558669636 | DRAFT_00304 | Metacyc        | GLYCLEAV-PWY: glycine cleavage                                         |           |
| 2558669636 | DRAFT_00304 | COG_category   | [E] Amino acid transport and metabolism                                |           |
| 2558669636 | DRAFT_00304 | COG0403        | Glycine cleavage system protein P (pyridoxal-binding), N-terminal dom: | 1.00E-127 |
| 2558669636 | DRAFT_00304 | pfam02347      | GDC-P                                                                  | 1.00E-115 |
| 2558669636 | DRAFT_00304 | EC:1.4.4.2     | Glycine dehydrogenase (decarboxylating).                               |           |
| 2558669636 | DRAFT_00304 | KO:K00282      | glycine dehydrogenase subunit 1 [EC:1.4.4.2]                           | 0.00E+00  |
| 2558669636 | DRAFT_00304 | Locus_type     | CDS                                                                    |           |
| 2558669636 | DRAFT_00304 | Product_name   | Glycine cleavage system protein P (pyridoxal-binding), N-terminal dor  |           |
| 2558669636 | DRAFT_00304 | Scaffold       | DRAFT_contig_70_22_len_70082_read_count_1249074.3                      |           |
| 2558669636 | DRAFT_00304 | Coordinates    | 51989..53314(-)                                                        |           |
| 2558669636 | DRAFT_00304 | DNA_length     | 1326bp                                                                 |           |
| 2558669636 | DRAFT_00304 | Protein_length | 441aa                                                                  |           |
| 2558669636 | DRAFT_00304 | GC             |                                                                        | 0.6       |
| 2558669637 | DRAFT_00305 | Locus_type     | CDS                                                                    |           |
| 2558669637 | DRAFT_00305 | Product_name   | hypothetical protein                                                   |           |
| 2558669637 | DRAFT_00305 | Scaffold       | DRAFT_contig_70_22_len_70082_read_count_1249074.3                      |           |
| 2558669637 | DRAFT_00305 | Coordinates    | 53433..55115(+)                                                        |           |
| 2558669637 | DRAFT_00305 | DNA_length     | 1683bp                                                                 |           |
| 2558669637 | DRAFT_00305 | Protein_length | 560aa                                                                  |           |
| 2558669637 | DRAFT_00305 | GC             |                                                                        | 0.57      |
| 2558669637 | DRAFT_00305 | Transmembrane  | Yes                                                                    |           |
| 2558669638 | DRAFT_00306 | Metacyc        | THIOREDOX-PWY: thioredoxin pathway                                     |           |
| 2558669638 | DRAFT_00306 | COG_category   | [O] Posttranslational modification, protein turnover, chaperones       |           |
| 2558669638 | DRAFT_00306 | COG0492        | Thioredoxin reductase                                                  | 3.00E-87  |
| 2558669638 | DRAFT_00306 | pfam07992      | Pyr_redox_2                                                            | 9.10E-28  |
| 2558669638 | DRAFT_00306 | pfam00070      | Pyr_redox                                                              | 1.30E-15  |
| 2558669638 | DRAFT_00306 | EC:1.8.1.9     | Thioredoxin-disulfide reductase.                                       |           |
| 2558669638 | DRAFT_00306 | TIGR01292      | thioredoxin-disulfide reductase                                        | 2.20E-120 |
| 2558669638 | DRAFT_00306 | KO:K00384      | thioredoxin reductase (NADPH) [EC:1.8.1.9]                             | 0.00E+00  |
| 2558669638 | DRAFT_00306 | Locus_type     | CDS                                                                    |           |
| 2558669638 | DRAFT_00306 | Product_name   | thioredoxin-disulfide reductase                                        |           |
| 2558669638 | DRAFT_00306 | Scaffold       | DRAFT_contig_70_22_len_70082_read_count_1249074.3                      |           |

|            |             |                |                                                                            |           |
|------------|-------------|----------------|----------------------------------------------------------------------------|-----------|
| 2558669638 | DRAFT_00306 | Coordinates    | 55176..56120(+)                                                            |           |
| 2558669638 | DRAFT_00306 | DNA_length     | 945bp                                                                      |           |
| 2558669638 | DRAFT_00306 | Protein_length | 314aa                                                                      |           |
| 2558669638 | DRAFT_00306 | GC             |                                                                            | 0.59      |
| 2558669639 | DRAFT_00307 | COG_category   | [O] Posttranslational modification, protein turnover, chaperones           |           |
| 2558669639 | DRAFT_00307 | COG1180        | Pyruvate-formate lyase-activating enzyme                                   | 1.00E-63  |
| 2558669639 | DRAFT_00307 | pfam04055      | Radical_SAM                                                                | 1.40E-08  |
| 2558669639 | DRAFT_00307 | EC:1.97.1.4    | [Formate-C-acetyltransferase]-activating enzyme.                           |           |
| 2558669639 | DRAFT_00307 | TIGR04337      | AmmeMemoRadiSam system radical SAM enzyme                                  | 1.90E-101 |
| 2558669639 | DRAFT_00307 | KO:K04069      | pyruvate formate lyase activating enzyme [EC:1.97.1.4]                     | 0.00E+00  |
| 2558669639 | DRAFT_00307 | Locus_type     | CDS                                                                        |           |
| 2558669639 | DRAFT_00307 | Product_name   | AmmeMemoRadiSam system radical SAM enzyme                                  |           |
| 2558669639 | DRAFT_00307 | Scaffold       | DRAFT_contig_70_22_len_70082_read_count_1249074.3                          |           |
| 2558669639 | DRAFT_00307 | Coordinates    | 56113..57285(-)                                                            |           |
| 2558669639 | DRAFT_00307 | DNA_length     | 1173bp                                                                     |           |
| 2558669639 | DRAFT_00307 | Protein_length | 390aa                                                                      |           |
| 2558669639 | DRAFT_00307 | GC             |                                                                            | 0.58      |
| 2558669640 | DRAFT_00308 | KEGG_module    | M00307: Pyruvate oxidation, pyruvate => acetyl-CoA                         |           |
| 2558669640 | DRAFT_00308 | KEGG_module    | M00173: Reductive citric acid cycle (Arnon-Buchanan cycle)                 |           |
| 2558669640 | DRAFT_00308 | KEGG_module    | M00310: Pyruvate:ferredoxin oxidoreductase                                 |           |
| 2558669640 | DRAFT_00308 | KEGG_module    | M00374: Dicarboxylate-hydroxybutyrate cycle                                |           |
| 2558669640 | DRAFT_00308 | Metacyc        | PWY-6583: pyruvate fermentation to butanol I                               |           |
| 2558669640 | DRAFT_00308 | Metacyc        | PWY-5538: pyruvate fermentation to acetate VI                              |           |
| 2558669640 | DRAFT_00308 | Metacyc        | PWY-6142: gluconeogenesis II (<i>Methanobacterium thermoautotrophicum</i>) |           |
| 2558669640 | DRAFT_00308 | Metacyc        | PWY-5483: pyruvate fermentation to acetate III                             |           |
| 2558669640 | DRAFT_00308 | Metacyc        | PWY-6587: pyruvate fermentation to ethanol III                             |           |
| 2558669640 | DRAFT_00308 | Metacyc        | GLUDEG-II-PWY: glutamate degradation VII (to butanoate)                    |           |
| 2558669640 | DRAFT_00308 | Metacyc        | P42-PWY: incomplete reductive TCA cycle                                    |           |
| 2558669640 | DRAFT_00308 | Metacyc        | NPGLUCAT-PWY: Entner-Doudoroff pathway II (non-phosphorylative)            |           |
| 2558669640 | DRAFT_00308 | Metacyc        | PWY-7003: glycerol degradation to butanol                                  |           |
| 2558669640 | DRAFT_00308 | Metacyc        | PWY-5493: reductive monocarboxylic acid cycle                              |           |
| 2558669640 | DRAFT_00308 | Metacyc        | PWY-6588: pyruvate fermentation to acetone                                 |           |

|            |             |                |                                                                       |          |
|------------|-------------|----------------|-----------------------------------------------------------------------|----------|
| 2558669640 | DRAFT_00308 | Metacyc        | CENTFERM-PWY: pyruvate fermentation to butanoate                      |          |
| 2558669640 | DRAFT_00308 | Metacyc        | PWY-5497: purine nucleobases degradation II (anaerobic)               |          |
| 2558669640 | DRAFT_00308 | Metacyc        | PWY-6863: pyruvate fermentation to hexanol                            |          |
| 2558669640 | DRAFT_00308 | Metacyc        | PWY-5600: pyruvate fermentation to acetate VII                        |          |
| 2558669640 | DRAFT_00308 | Metacyc        | P142-PWY: pyruvate fermentation to acetate I                          |          |
| 2558669640 | DRAFT_00308 | Metacyc        | P23-PWY: reductive TCA cycle I                                        |          |
| 2558669640 | DRAFT_00308 | Metacyc        | PWY-5392: reductive TCA cycle II                                      |          |
| 2558669640 | DRAFT_00308 | Metacyc        | PWY-6876: isopropanol biosynthesis                                    |          |
| 2558669640 | DRAFT_00308 | COG_category   | [C] Energy production and conversion                                  |          |
| 2558669640 | DRAFT_00308 | COG1013        | Pyruvate:ferredoxin oxidoreductase and related 2-oxoacid:ferredoxin c | 1.00E-71 |
| 2558669640 | DRAFT_00308 | pfam02775      | TPP_enzyme_C                                                          | 5.70E-25 |
| 2558669640 | DRAFT_00308 | EC:1.2.7.1     | Pyruvate synthase.                                                    |          |
| 2558669640 | DRAFT_00308 | KO:K00170      | pyruvate ferredoxin oxidoreductase, beta subunit [EC:1.2.7.1]         | 0.00E+00 |
| 2558669640 | DRAFT_00308 | Locus_type     | CDS                                                                   |          |
| 2558669640 | DRAFT_00308 | Product_name   | Pyruvate:ferredoxin oxidoreductase and related 2-oxoacid:ferredoxin   |          |
| 2558669640 | DRAFT_00308 | Scaffold       | DRAFT_contig_70_22_len_70082_read_count_1249074.3                     |          |
| 2558669640 | DRAFT_00308 | Coordinates    | 57331..58278(-)                                                       |          |
| 2558669640 | DRAFT_00308 | DNA_length     | 948bp                                                                 |          |
| 2558669640 | DRAFT_00308 | Protein_length | 315aa                                                                 |          |
| 2558669640 | DRAFT_00308 | GC             |                                                                       | 0.58     |
| 2558669641 | DRAFT_00309 | KEGG_module    | M00374: Dicarboxylate-hydroxybutyrate cycle                           |          |
| 2558669641 | DRAFT_00309 | KEGG_module    | M00310: Pyruvate:ferredoxin oxidoreductase                            |          |
| 2558669641 | DRAFT_00309 | KEGG_module    | M00173: Reductive citric acid cycle (Arnon-Buchanan cycle)            |          |
| 2558669641 | DRAFT_00309 | KEGG_module    | M00307: Pyruvate oxidation, pyruvate => acetyl-CoA                    |          |
| 2558669641 | DRAFT_00309 | Metacyc        | PWY-5600: pyruvate fermentation to acetate VII                        |          |
| 2558669641 | DRAFT_00309 | Metacyc        | PWY-6876: isopropanol biosynthesis                                    |          |
| 2558669641 | DRAFT_00309 | Metacyc        | PWY-6588: pyruvate fermentation to acetone                            |          |
| 2558669641 | DRAFT_00309 | Metacyc        | PWY-5538: pyruvate fermentation to acetate VI                         |          |
| 2558669641 | DRAFT_00309 | Metacyc        | PWY-5483: pyruvate fermentation to acetate III                        |          |
| 2558669641 | DRAFT_00309 | Metacyc        | PWY-6587: pyruvate fermentation to ethanol III                        |          |
| 2558669641 | DRAFT_00309 | Metacyc        | P42-PWY: incomplete reductive TCA cycle                               |          |
| 2558669641 | DRAFT_00309 | Metacyc        | PWY-6583: pyruvate fermentation to butanol I                          |          |
| 2558669641 | DRAFT_00309 | Metacyc        | P23-PWY: reductive TCA cycle I                                        |          |



|            |             |                |                                                                              |          |
|------------|-------------|----------------|------------------------------------------------------------------------------|----------|
| 2558669641 | DRAFT_00309 | Metacyc        | NPGLUCAT-PWY: Entner-Doudoroff pathway II (non-phosphorylative)              |          |
| 2558669641 | DRAFT_00309 | Metacyc        | PWY-5493: reductive monocarboxylic acid cycle                                |          |
| 2558669641 | DRAFT_00309 | Metacyc        | PWY-5497: purine nucleobases degradation II (anaerobic)                      |          |
| 2558669641 | DRAFT_00309 | Metacyc        | PWY-5392: reductive TCA cycle II                                             |          |
| 2558669641 | DRAFT_00309 | Metacyc        | PWY-6863: pyruvate fermentation to hexanol                                   |          |
| 2558669641 | DRAFT_00309 | Metacyc        | CENTFERM-PWY: pyruvate fermentation to butanoate                             |          |
| 2558669641 | DRAFT_00309 | Metacyc        | PWY-6142: gluconeogenesis II ( <i>Methanobacterium thermoautotrophicum</i> ) |          |
| 2558669641 | DRAFT_00309 | Metacyc        | PWY-7003: glycerol degradation to butanol                                    |          |
| 2558669641 | DRAFT_00309 | Metacyc        | P142-PWY: pyruvate fermentation to acetate I                                 |          |
| 2558669641 | DRAFT_00309 | Metacyc        | GLUDEG-II-PWY: glutamate degradation VII (to butanoate)                      |          |
| 2558669641 | DRAFT_00309 | COG_category   | [C] Energy production and conversion                                         |          |
| 2558669641 | DRAFT_00309 | COG0674        | Pyruvate:ferredoxin oxidoreductase and related 2-oxoacid:ferredoxin c        | 2.00E-76 |
| 2558669641 | DRAFT_00309 | pfam01855      | POR_N                                                                        | 1.50E-68 |
| 2558669641 | DRAFT_00309 | EC:1.2.7.1     | Pyruvate synthase.                                                           |          |
| 2558669641 | DRAFT_00309 | KO:K00169      | pyruvate ferredoxin oxidoreductase, alpha subunit [EC:1.2.7.1]               | 0.00E+00 |
| 2558669641 | DRAFT_00309 | Locus_type     | CDS                                                                          |          |
| 2558669641 | DRAFT_00309 | Product_name   | Pyruvate:ferredoxin oxidoreductase and related 2-oxoacid:ferredoxin          |          |
| 2558669641 | DRAFT_00309 | Scaffold       | DRAFT_contig_70_22_len_70082_read_count_1249074.3                            |          |
| 2558669641 | DRAFT_00309 | Coordinates    | 58279..59463(-)                                                              |          |
| 2558669641 | DRAFT_00309 | DNA_length     | 1185bp                                                                       |          |
| 2558669641 | DRAFT_00309 | Protein_length | 394aa                                                                        |          |
| 2558669641 | DRAFT_00309 | GC             |                                                                              | 0.59     |
| 2558669642 | DRAFT_00310 | KEGG_module    | M00310: Pyruvate:ferredoxin oxidoreductase                                   |          |
| 2558669642 | DRAFT_00310 | KEGG_module    | M00173: Reductive citric acid cycle (Arnon-Buchanan cycle)                   |          |
| 2558669642 | DRAFT_00310 | KEGG_module    | M00307: Pyruvate oxidation, pyruvate => acetyl-CoA                           |          |
| 2558669642 | DRAFT_00310 | KEGG_module    | M00374: Dicarboxylate-hydroxybutyrate cycle                                  |          |
| 2558669642 | DRAFT_00310 | Metacyc        | PWY-6876: isopropanol biosynthesis                                           |          |
| 2558669642 | DRAFT_00310 | Metacyc        | PWY-5497: purine nucleobases degradation II (anaerobic)                      |          |
| 2558669642 | DRAFT_00310 | Metacyc        | P42-PWY: incomplete reductive TCA cycle                                      |          |
| 2558669642 | DRAFT_00310 | Metacyc        | PWY-6583: pyruvate fermentation to butanol I                                 |          |
| 2558669642 | DRAFT_00310 | Metacyc        | CENTFERM-PWY: pyruvate fermentation to butanoate                             |          |
| 2558669642 | DRAFT_00310 | Metacyc        | PWY-6863: pyruvate fermentation to hexanol                                   |          |
| 2558669642 | DRAFT_00310 | Metacyc        | PWY-5600: pyruvate fermentation to acetate VII                               |          |

|            |             |                |                                                                            |          |
|------------|-------------|----------------|----------------------------------------------------------------------------|----------|
| 2558669642 | DRAFT_00310 | Metacyc        | P142-PWY: pyruvate fermentation to acetate I                               |          |
| 2558669642 | DRAFT_00310 | Metacyc        | PWY-5538: pyruvate fermentation to acetate VI                              |          |
| 2558669642 | DRAFT_00310 | Metacyc        | PWY-5483: pyruvate fermentation to acetate III                             |          |
| 2558669642 | DRAFT_00310 | Metacyc        | GLUDEG-II-PWY: glutamate degradation VII (to butanoate)                    |          |
| 2558669642 | DRAFT_00310 | Metacyc        | PWY-5493: reductive monocarboxylic acid cycle                              |          |
| 2558669642 | DRAFT_00310 | Metacyc        | PWY-6588: pyruvate fermentation to acetone                                 |          |
| 2558669642 | DRAFT_00310 | Metacyc        | PWY-6587: pyruvate fermentation to ethanol III                             |          |
| 2558669642 | DRAFT_00310 | Metacyc        | NPGLUCAT-PWY: Entner-Doudoroff pathway II (non-phosphorylative)            |          |
| 2558669642 | DRAFT_00310 | Metacyc        | PWY-7003: glycerol degradation to butanol                                  |          |
| 2558669642 | DRAFT_00310 | Metacyc        | P23-PWY: reductive TCA cycle I                                             |          |
| 2558669642 | DRAFT_00310 | Metacyc        | PWY-6142: gluconeogenesis II (<i>Methanobacterium thermoautotrophicum</i>) |          |
| 2558669642 | DRAFT_00310 | Metacyc        | PWY-5392: reductive TCA cycle II                                           |          |
| 2558669642 | DRAFT_00310 | COG_category   | [C] Energy production and conversion                                       |          |
| 2558669642 | DRAFT_00310 | COG1144        | Pyruvate:ferredoxin oxidoreductase and related 2-oxoacid:ferredoxin c      | 3.00E-20 |
| 2558669642 | DRAFT_00310 | pfam14697      | Fer4_21                                                                    | 4.90E-09 |
| 2558669642 | DRAFT_00310 | EC:1.2.7.1     | Pyruvate synthase.                                                         |          |
| 2558669642 | DRAFT_00310 | TIGR02179      | 2-oxoacid:acceptor oxidoreductase, delta subunit, pyruvate/2-ketoisov      | 3.90E-34 |
| 2558669642 | DRAFT_00310 | KO:K00171      | pyruvate ferredoxin oxidoreductase, delta subunit [EC:1.2.7.1]             | 1.90E-21 |
| 2558669642 | DRAFT_00310 | Locus_type     | CDS                                                                        |          |
| 2558669642 | DRAFT_00310 | Product_name   | 2-oxoacid:acceptor oxidoreductase, delta subunit, pyruvate/2-ketoisc       |          |
| 2558669642 | DRAFT_00310 | Scaffold       | DRAFT_contig_70_22_len_70082_read_count_1249074.3                          |          |
| 2558669642 | DRAFT_00310 | Coordinates    | 59460..59726(-)                                                            |          |
| 2558669642 | DRAFT_00310 | DNA_length     | 267bp                                                                      |          |
| 2558669642 | DRAFT_00310 | Protein_length | 88aa                                                                       |          |
| 2558669642 | DRAFT_00310 | GC             |                                                                            | 0.58     |
| 2558669643 | DRAFT_00311 | KEGG_module    | M00173: Reductive citric acid cycle (Arnon-Buchanan cycle)                 |          |
| 2558669643 | DRAFT_00311 | KEGG_module    | M00374: Dicarboxylate-hydroxybutyrate cycle                                |          |
| 2558669643 | DRAFT_00311 | KEGG_module    | M00307: Pyruvate oxidation, pyruvate => acetyl-CoA                         |          |
| 2558669643 | DRAFT_00311 | KEGG_module    | M00310: Pyruvate:ferredoxin oxidoreductase                                 |          |
| 2558669643 | DRAFT_00311 | Metacyc        | PWY-6583: pyruvate fermentation to butanol I                               |          |
| 2558669643 | DRAFT_00311 | Metacyc        | PWY-5600: pyruvate fermentation to acetate VII                             |          |
| 2558669643 | DRAFT_00311 | Metacyc        | P142-PWY: pyruvate fermentation to acetate I                               |          |
| 2558669643 | DRAFT_00311 | Metacyc        | GLUDEG-II-PWY: glutamate degradation VII (to butanoate)                    |          |

|            |             |                |                                                                            |          |
|------------|-------------|----------------|----------------------------------------------------------------------------|----------|
| 2558669643 | DRAFT_00311 | Metacyc        | PWY-5483: pyruvate fermentation to acetate III                             |          |
| 2558669643 | DRAFT_00311 | Metacyc        | PWY-6588: pyruvate fermentation to acetone                                 |          |
| 2558669643 | DRAFT_00311 | Metacyc        | PWY-6876: isopropanol biosynthesis                                         |          |
| 2558669643 | DRAFT_00311 | Metacyc        | PWY-7003: glycerol degradation to butanol                                  |          |
| 2558669643 | DRAFT_00311 | Metacyc        | CENTFERM-PWY: pyruvate fermentation to butanoate                           |          |
| 2558669643 | DRAFT_00311 | Metacyc        | PWY-6142: gluconeogenesis II (<i>Methanobacterium thermoautotrophicum</i>) |          |
| 2558669643 | DRAFT_00311 | Metacyc        | PWY-6863: pyruvate fermentation to hexanol                                 |          |
| 2558669643 | DRAFT_00311 | Metacyc        | PWY-5538: pyruvate fermentation to acetate VI                              |          |
| 2558669643 | DRAFT_00311 | Metacyc        | PWY-6587: pyruvate fermentation to ethanol III                             |          |
| 2558669643 | DRAFT_00311 | Metacyc        | NPGLUCAT-PWY: Entner-Doudoroff pathway II (non-phosphorylative)            |          |
| 2558669643 | DRAFT_00311 | Metacyc        | PWY-5497: purine nucleobases degradation II (anaerobic)                    |          |
| 2558669643 | DRAFT_00311 | Metacyc        | P23-PWY: reductive TCA cycle I                                             |          |
| 2558669643 | DRAFT_00311 | Metacyc        | PWY-5493: reductive monocarboxylic acid cycle                              |          |
| 2558669643 | DRAFT_00311 | Metacyc        | PWY-5392: reductive TCA cycle II                                           |          |
| 2558669643 | DRAFT_00311 | Metacyc        | P42-PWY: incomplete reductive TCA cycle                                    |          |
| 2558669643 | DRAFT_00311 | COG_category   | [C] Energy production and conversion                                       |          |
| 2558669643 | DRAFT_00311 | COG1014        | Pyruvate:ferredoxin oxidoreductase and related 2-oxoacid:ferredoxin c      | 2.00E-26 |
| 2558669643 | DRAFT_00311 | pfam01558      | POR                                                                        | 2.70E-35 |
| 2558669643 | DRAFT_00311 | EC:1.2.7.1     | Pyruvate synthase.                                                         |          |
| 2558669643 | DRAFT_00311 | TIGR02175      | 2-oxoacid:acceptor oxidoreductase, gamma subunit, pyruvate/2-ketois        | 3.20E-63 |
| 2558669643 | DRAFT_00311 | KO:K00172      | pyruvate ferredoxin oxidoreductase, gamma subunit [EC:1.2.7.1]             | 7.60E-41 |
| 2558669643 | DRAFT_00311 | Locus_type     | CDS                                                                        |          |
| 2558669643 | DRAFT_00311 | Product_name   | 2-oxoacid:acceptor oxidoreductase, gamma subunit, pyruvate/2-keto          |          |
| 2558669643 | DRAFT_00311 | Scaffold       | DRAFT_contig_70_22_len_70082_read_count_1249074.3                          |          |
| 2558669643 | DRAFT_00311 | Coordinates    | 59723..60280(-)                                                            |          |
| 2558669643 | DRAFT_00311 | DNA_length     | 558bp                                                                      |          |
| 2558669643 | DRAFT_00311 | Protein_length | 185aa                                                                      |          |
| 2558669643 | DRAFT_00311 | GC             |                                                                            | 0.63     |
| 2558669644 | DRAFT_00312 | COG_category   | [S] Function unknown                                                       |          |
| 2558669644 | DRAFT_00312 | COG5616        | Predicted integral membrane protein                                        | 1.00E-35 |
| 2558669644 | DRAFT_00312 | pfam00211      | Guanylate_cyc                                                              | 3.30E-26 |
| 2558669644 | DRAFT_00312 | pfam13414      | TPR_11                                                                     | 1.50E-09 |
| 2558669644 | DRAFT_00312 | EC:4.6.1.1     | Adenylate cyclase.                                                         |          |

|            |             |                |                                                   |           |
|------------|-------------|----------------|---------------------------------------------------|-----------|
| 2558669644 | DRAFT_00312 | KO:K01768      | adenylate cyclase [EC:4.6.1.1]                    | 0.00E+00  |
| 2558669644 | DRAFT_00312 | Locus_type     | CDS                                               |           |
| 2558669644 | DRAFT_00312 | Product_name   | Predicted integral membrane protein               |           |
| 2558669644 | DRAFT_00312 | Scaffold       | DRAFT_contig_70_22_len_70082_read_count_1249074.3 |           |
| 2558669644 | DRAFT_00312 | Coordinates    | 60633..62579(-)                                   |           |
| 2558669644 | DRAFT_00312 | DNA_length     | 1947bp                                            |           |
| 2558669644 | DRAFT_00312 | Protein_length | 648aa                                             |           |
| 2558669644 | DRAFT_00312 | GC             |                                                   | 0.57      |
| 2558669644 | DRAFT_00312 | Fused_gene     | Yes                                               |           |
|            |             |                |                                                   |           |
| 2558669645 | DRAFT_00313 | COG_category   | [S] Function unknown                              |           |
| 2558669645 | DRAFT_00313 | COG5616        | Predicted integral membrane protein               | 8.00E-36  |
| 2558669645 | DRAFT_00313 | pfam13414      | TPR_11                                            | 5.70E-10  |
| 2558669645 | DRAFT_00313 | pfam00211      | Guanylate_cyc                                     | 1.10E-20  |
| 2558669645 | DRAFT_00313 | EC:4.6.1.1     | Adenylate cyclase.                                |           |
| 2558669645 | DRAFT_00313 | KO:K01768      | adenylate cyclase [EC:4.6.1.1]                    | 0.00E+00  |
| 2558669645 | DRAFT_00313 | Locus_type     | CDS                                               |           |
| 2558669645 | DRAFT_00313 | Product_name   | Predicted integral membrane protein               |           |
| 2558669645 | DRAFT_00313 | Scaffold       | DRAFT_contig_70_22_len_70082_read_count_1249074.3 |           |
| 2558669645 | DRAFT_00313 | Coordinates    | 62576..64504(-)                                   |           |
| 2558669645 | DRAFT_00313 | DNA_length     | 1929bp                                            |           |
| 2558669645 | DRAFT_00313 | Protein_length | 642aa                                             |           |
| 2558669645 | DRAFT_00313 | GC             |                                                   | 0.57      |
|            |             |                |                                                   |           |
| 2558669646 | DRAFT_00314 | COG_category   | [P] Inorganic ion transport and metabolism        |           |
| 2558669646 | DRAFT_00314 | COG0798        | Arsenite efflux pump ACR3 and related permeases   | 7.00E-90  |
| 2558669646 | DRAFT_00314 | pfam01758      | SBF                                               | 4.60E-55  |
| 2558669646 | DRAFT_00314 | TIGR00832      | arsenical-resistance protein                      | 3.70E-129 |
| 2558669646 | DRAFT_00314 | KO:K03325      | arsenite transporter, ACR3 family                 | 0.00E+00  |
| 2558669646 | DRAFT_00314 | Locus_type     | CDS                                               |           |
| 2558669646 | DRAFT_00314 | Product_name   | arsenical-resistance protein                      |           |
| 2558669646 | DRAFT_00314 | Scaffold       | DRAFT_contig_70_22_len_70082_read_count_1249074.3 |           |
| 2558669646 | DRAFT_00314 | Coordinates    | 64838..65992(+)                                   |           |
| 2558669646 | DRAFT_00314 | DNA_length     | 1155bp                                            |           |

|            |             |                |                                                   |          |
|------------|-------------|----------------|---------------------------------------------------|----------|
| 2558669646 | DRAFT_00314 | Protein_length | 384aa                                             |          |
| 2558669646 | DRAFT_00314 | GC             |                                                   | 0.58     |
| 2558669646 | DRAFT_00314 | Transmembrane  | Yes                                               |          |
| 2558669647 | DRAFT_00315 | COG_category   | [K] Transcription                                 |          |
| 2558669647 | DRAFT_00315 | COG0640        | Predicted transcriptional regulators              | 9.00E-09 |
| 2558669647 | DRAFT_00315 | pfam01022      | HTH_5                                             | 1.40E-18 |
| 2558669647 | DRAFT_00315 | KO:K03892      | ArsR family transcriptional regulator             | 2.20E-15 |
| 2558669647 | DRAFT_00315 | Locus_type     | CDS                                               |          |
| 2558669647 | DRAFT_00315 | Product_name   | Predicted transcriptional regulators              |          |
| 2558669647 | DRAFT_00315 | Scaffold       | DRAFT_contig_70_22_len_70082_read_count_1249074.3 |          |
| 2558669647 | DRAFT_00315 | Coordinates    | 65989..66366(+)                                   |          |
| 2558669647 | DRAFT_00315 | DNA_length     | 378bp                                             |          |
| 2558669647 | DRAFT_00315 | Protein_length | 125aa                                             |          |
| 2558669647 | DRAFT_00315 | GC             |                                                   | 0.54     |
| 2558669648 | DRAFT_00316 | COG_category   | [T] Signal transduction mechanisms                |          |
| 2558669648 | DRAFT_00316 | COG0394        | Protein-tyrosine-phosphatase                      | 2.00E-25 |
| 2558669648 | DRAFT_00316 | pfam01451      | LMWPC                                             | 5.40E-27 |
| 2558669648 | DRAFT_00316 | Locus_type     | CDS                                               |          |
| 2558669648 | DRAFT_00316 | Product_name   | Protein-tyrosine-phosphatase                      |          |
| 2558669648 | DRAFT_00316 | Scaffold       | DRAFT_contig_70_22_len_70082_read_count_1249074.3 |          |
| 2558669648 | DRAFT_00316 | Coordinates    | 66376..66783(+)                                   |          |
| 2558669648 | DRAFT_00316 | DNA_length     | 408bp                                             |          |
| 2558669648 | DRAFT_00316 | Protein_length | 135aa                                             |          |
| 2558669648 | DRAFT_00316 | GC             |                                                   | 0.57     |
| 2558669649 | DRAFT_00317 | Locus_type     | CDS                                               |          |
| 2558669649 | DRAFT_00317 | Product_name   | hypothetical protein                              |          |
| 2558669649 | DRAFT_00317 | Scaffold       | DRAFT_contig_70_22_len_70082_read_count_1249074.3 |          |
| 2558669649 | DRAFT_00317 | Coordinates    | 67017..67325(+)                                   |          |
| 2558669649 | DRAFT_00317 | DNA_length     | 309bp                                             |          |
| 2558669649 | DRAFT_00317 | Protein_length | 102aa                                             |          |
| 2558669649 | DRAFT_00317 | GC             |                                                   | 0.54     |

|            |             |                |                                                           |          |
|------------|-------------|----------------|-----------------------------------------------------------|----------|
| 2558669649 | DRAFT_00317 | Transmembrane  | Yes                                                       |          |
| 2558669650 | DRAFT_00318 | COG_category   | [K] Transcription                                         |          |
| 2558669650 | DRAFT_00318 | COG1309        | Transcriptional regulator                                 | 1.00E-11 |
| 2558669650 | DRAFT_00318 | pfam00440      | TetR_N                                                    | 3.50E-17 |
| 2558669650 | DRAFT_00318 | ITERM:02313    | transcriptional regulator, TetR family                    |          |
| 2558669650 | DRAFT_00318 | Locus_type     | CDS                                                       |          |
| 2558669650 | DRAFT_00318 | Product_name   | transcriptional regulator, TetR family                    |          |
| 2558669650 | DRAFT_00318 | Scaffold       | DRAFT_contig_70_22_len_70082_read_count_1249074.3         |          |
| 2558669650 | DRAFT_00318 | Coordinates    | 67342..67950(+)                                           |          |
| 2558669650 | DRAFT_00318 | DNA_length     | 609bp                                                     |          |
| 2558669650 | DRAFT_00318 | Protein_length | 202aa                                                     |          |
| 2558669650 | DRAFT_00318 | GC             |                                                           | 0.54     |
| 2558669651 | DRAFT_00319 | Locus_type     | CDS                                                       |          |
| 2558669651 | DRAFT_00319 | Product_name   | hypothetical protein                                      |          |
| 2558669651 | DRAFT_00319 | Scaffold       | DRAFT_contig_70_22_len_70082_read_count_1249074.3         |          |
| 2558669651 | DRAFT_00319 | Coordinates    | 68014..68427(+)                                           |          |
| 2558669651 | DRAFT_00319 | DNA_length     | 414bp                                                     |          |
| 2558669651 | DRAFT_00319 | Protein_length | 137aa                                                     |          |
| 2558669651 | DRAFT_00319 | GC             |                                                           | 0.57     |
| 2558669652 | DRAFT_00320 | pfam13847      | Methyltransf_31                                           | 7.50E-20 |
| 2558669652 | DRAFT_00320 | Locus_type     | CDS                                                       |          |
| 2558669652 | DRAFT_00320 | Product_name   | Methylase involved in ubiquinone/menaquinone biosynthesis |          |
| 2558669652 | DRAFT_00320 | Scaffold       | DRAFT_contig_70_22_len_70082_read_count_1249074.3         |          |
| 2558669652 | DRAFT_00320 | Coordinates    | 68424..68936(+)                                           |          |
| 2558669652 | DRAFT_00320 | DNA_length     | 513bp                                                     |          |
| 2558669652 | DRAFT_00320 | Protein_length | 170aa                                                     |          |
| 2558669652 | DRAFT_00320 | GC             |                                                           | 0.58     |
| 2558669653 | DRAFT_00321 | Locus_type     | CDS                                                       |          |
| 2558669653 | DRAFT_00321 | Product_name   | hypothetical protein                                      |          |
| 2558669653 | DRAFT_00321 | Scaffold       | DRAFT_contig_70_22_len_70082_read_count_1249074.3         |          |

|            |             |                |                                                   |          |
|------------|-------------|----------------|---------------------------------------------------|----------|
| 2558669653 | DRAFT_00321 | Coordinates    | 68946..69197(+)                                   |          |
| 2558669653 | DRAFT_00321 | DNA_length     | 252bp                                             |          |
| 2558669653 | DRAFT_00321 | Protein_length | 83aa                                              |          |
| 2558669653 | DRAFT_00321 | GC             |                                                   | 0.49     |
| 2558669653 | DRAFT_00321 | Signal_peptide | Yes                                               |          |
| 2558669653 | DRAFT_00321 | Transmembrane  | Yes                                               |          |
| 2558669654 | DRAFT_00322 | COG_category   | [L] Replication, recombination and repair         |          |
| 2558669654 | DRAFT_00322 | COG3316        | Transposase and inactivated derivatives           | 2.00E-15 |
| 2558669654 | DRAFT_00322 | pfam13610      | DDE_Tnp_IS240                                     | 3.30E-23 |
| 2558669654 | DRAFT_00322 | Locus_type     | CDS                                               |          |
| 2558669654 | DRAFT_00322 | Product_name   | Transposase and inactivated derivatives           |          |
| 2558669654 | DRAFT_00322 | Scaffold       | DRAFT_contig_70_22_len_70082_read_count_1249074.3 |          |
| 2558669654 | DRAFT_00322 | Coordinates    | 69160..70080(-)                                   |          |
| 2558669654 | DRAFT_00322 | DNA_length     | 921bp                                             |          |
| 2558669654 | DRAFT_00322 | Protein_length | 306aa                                             |          |
| 2558669654 | DRAFT_00322 | GC             |                                                   | 0.54     |
| 2558669655 | DRAFT_00323 | pfam08494      | DEAD_assoc                                        | 1.30E-17 |
| 2558669655 | DRAFT_00323 | Locus_type     | CDS                                               |          |
| 2558669655 | DRAFT_00323 | Product_name   | Lhr-like helicases                                |          |
| 2558669655 | DRAFT_00323 | Scaffold       | DRAFT_contig_70_37_len_56021_read_count_1021764.4 |          |
| 2558669655 | DRAFT_00323 | Coordinates    | 3..884(+)                                         |          |
| 2558669655 | DRAFT_00323 | DNA_length     | 882bp                                             |          |
| 2558669655 | DRAFT_00323 | Protein_length | 293aa                                             |          |
| 2558669655 | DRAFT_00323 | GC             |                                                   | 0.59     |
| 2558669656 | DRAFT_00324 | Locus_type     | CDS                                               |          |
| 2558669656 | DRAFT_00324 | Product_name   | hypothetical protein                              |          |
| 2558669656 | DRAFT_00324 | Scaffold       | DRAFT_contig_70_37_len_56021_read_count_1021764.4 |          |
| 2558669656 | DRAFT_00324 | Coordinates    | 863..1417(-)                                      |          |
| 2558669656 | DRAFT_00324 | DNA_length     | 555bp                                             |          |
| 2558669656 | DRAFT_00324 | Protein_length | 184aa                                             |          |
| 2558669656 | DRAFT_00324 | GC             |                                                   | 0.6      |

|            |             |                |                                                                                                 |          |
|------------|-------------|----------------|-------------------------------------------------------------------------------------------------|----------|
| 2558669657 | DRAFT_00325 | Locus_type     | CDS                                                                                             |          |
| 2558669657 | DRAFT_00325 | Product_name   | hypothetical protein                                                                            |          |
| 2558669657 | DRAFT_00325 | Scaffold       | DRAFT_contig_70_37_len_56021_read_count_1021764.4                                               |          |
| 2558669657 | DRAFT_00325 | Coordinates    | 1417..2151(-)                                                                                   |          |
| 2558669657 | DRAFT_00325 | DNA_length     | 735bp                                                                                           |          |
| 2558669657 | DRAFT_00325 | Protein_length | 244aa                                                                                           |          |
| 2558669657 | DRAFT_00325 | GC             |                                                                                                 | 0.58     |
| 2558669658 | DRAFT_00326 | pfam02463      | SMC_N                                                                                           | 1.30E-34 |
| 2558669658 | DRAFT_00326 | Locus_type     | CDS                                                                                             |          |
| 2558669658 | DRAFT_00326 | Product_name   | RecF/RecN/SMC N terminal domain                                                                 |          |
| 2558669658 | DRAFT_00326 | Scaffold       | DRAFT_contig_70_37_len_56021_read_count_1021764.4                                               |          |
| 2558669658 | DRAFT_00326 | Coordinates    | 2177..4183(-)                                                                                   |          |
| 2558669658 | DRAFT_00326 | DNA_length     | 2007bp                                                                                          |          |
| 2558669658 | DRAFT_00326 | Protein_length | 668aa                                                                                           |          |
| 2558669658 | DRAFT_00326 | GC             |                                                                                                 | 0.59     |
| 2558669659 | DRAFT_00327 | COG_category   | [R] General function prediction only                                                            |          |
| 2558669659 | DRAFT_00327 | COG1201        | Lhr-like helicases                                                                              | 0.00E+00 |
| 2558669659 | DRAFT_00327 | pfam00270      | DEAD                                                                                            | 1.10E-30 |
| 2558669659 | DRAFT_00327 | pfam00271      | Helicase_C                                                                                      | 1.20E-17 |
| 2558669659 | DRAFT_00327 | pfam08494      | DEAD_assoc                                                                                      | 7.70E-23 |
| 2558669659 | DRAFT_00327 | EC:3.6.4.-     | Hydrolases. Acting on acid anhydrides. Acting on acid anhydrides; involved in cellular and subc |          |
| 2558669659 | DRAFT_00327 | KO:K03724      | ATP-dependent helicase Lhr and Lhr-like helicase [EC:3.6.4.-]                                   | 0.00E+00 |
| 2558669659 | DRAFT_00327 | Locus_type     | CDS                                                                                             |          |
| 2558669659 | DRAFT_00327 | Product_name   | Lhr-like helicases                                                                              |          |
| 2558669659 | DRAFT_00327 | Scaffold       | DRAFT_contig_70_37_len_56021_read_count_1021764.4                                               |          |
| 2558669659 | DRAFT_00327 | Coordinates    | 4307..7147(+)                                                                                   |          |
| 2558669659 | DRAFT_00327 | DNA_length     | 2841bp                                                                                          |          |
| 2558669659 | DRAFT_00327 | Protein_length | 946aa                                                                                           |          |
| 2558669659 | DRAFT_00327 | GC             |                                                                                                 | 0.61     |
| 2558669660 | DRAFT_00328 | Locus_type     | CDS                                                                                             |          |



|            |             |                |                                                       |          |
|------------|-------------|----------------|-------------------------------------------------------|----------|
| 2558669660 | DRAFT_00328 | Product_name   | hypothetical protein                                  |          |
| 2558669660 | DRAFT_00328 | Scaffold       | DRAFT_contig_70_37_len_56021_read_count_1021764.4     |          |
| 2558669660 | DRAFT_00328 | Coordinates    | 7184..7867(+)                                         |          |
| 2558669660 | DRAFT_00328 | DNA_length     | 684bp                                                 |          |
| 2558669660 | DRAFT_00328 | Protein_length | 227aa                                                 |          |
| 2558669660 | DRAFT_00328 | GC             |                                                       | 0.52     |
| 2558669661 | DRAFT_00329 | COG_category   | [R] General function prediction only                  |          |
| 2558669661 | DRAFT_00329 | COG1407        | Predicted ICC-like phosphoesterases                   | 1.00E-23 |
| 2558669661 | DRAFT_00329 | TIGR00024      | putative phosphoesterase, SbcD/Mre11-related          | 5.00E-24 |
| 2558669661 | DRAFT_00329 | ITERM:01876    | putative phosphoesterase                              |          |
| 2558669661 | DRAFT_00329 | Locus_type     | CDS                                                   |          |
| 2558669661 | DRAFT_00329 | Product_name   | putative phosphoesterase                              |          |
| 2558669661 | DRAFT_00329 | Scaffold       | DRAFT_contig_70_37_len_56021_read_count_1021764.4     |          |
| 2558669661 | DRAFT_00329 | Coordinates    | 7869..8627(+)                                         |          |
| 2558669661 | DRAFT_00329 | DNA_length     | 759bp                                                 |          |
| 2558669661 | DRAFT_00329 | Protein_length | 252aa                                                 |          |
| 2558669661 | DRAFT_00329 | GC             |                                                       | 0.58     |
| 2558669662 | DRAFT_00330 | IMG_pathway    | 964: DsbC-DsbD disulfide-isomerizing reductive system |          |
| 2558669662 | DRAFT_00330 | pfam00085      | Thioredoxin                                           | 1.60E-26 |
| 2558669662 | DRAFT_00330 | TIGR01068      | thioredoxin                                           | 3.40E-35 |
| 2558669662 | DRAFT_00330 | KO:K03671      | thioredoxin 1                                         | 2.20E-27 |
| 2558669662 | DRAFT_00330 | ITERM:01894    | thioredoxin                                           |          |
| 2558669662 | DRAFT_00330 | Locus_type     | CDS                                                   |          |
| 2558669662 | DRAFT_00330 | Product_name   | thioredoxin                                           |          |
| 2558669662 | DRAFT_00330 | Scaffold       | DRAFT_contig_70_37_len_56021_read_count_1021764.4     |          |
| 2558669662 | DRAFT_00330 | Coordinates    | 8634..8969(-)                                         |          |
| 2558669662 | DRAFT_00330 | DNA_length     | 336bp                                                 |          |
| 2558669662 | DRAFT_00330 | Protein_length | 111aa                                                 |          |
| 2558669662 | DRAFT_00330 | GC             |                                                       | 0.58     |
| 2558669663 | DRAFT_00331 | COG_category   | [R] General function prediction only                  |          |
| 2558669663 | DRAFT_00331 | COG_category   | [L] Replication, recombination and repair             |          |

|            |             |                |                                                                      |          |
|------------|-------------|----------------|----------------------------------------------------------------------|----------|
| 2558669663 | DRAFT_00331 | COG0494        | NTP pyrophosphohydrolases including oxidative damage repair enzyme   | 9.00E-09 |
| 2558669663 | DRAFT_00331 | pfam00293      | NUDIX                                                                | 1.50E-20 |
| 2558669663 | DRAFT_00331 | Locus_type     | CDS                                                                  |          |
| 2558669663 | DRAFT_00331 | Product_name   | NTP pyrophosphohydrolases including oxidative damage repair enzyme   |          |
| 2558669663 | DRAFT_00331 | Scaffold       | DRAFT_contig_70_37_len_56021_read_count_1021764.4                    |          |
| 2558669663 | DRAFT_00331 | Coordinates    | 9078..9620(+)                                                        |          |
| 2558669663 | DRAFT_00331 | DNA_length     | 543bp                                                                |          |
| 2558669663 | DRAFT_00331 | Protein_length | 180aa                                                                |          |
| 2558669663 | DRAFT_00331 | GC             |                                                                      | 0.58     |
| 2558669664 | DRAFT_00332 | COG_category   | [R] General function prediction only                                 |          |
| 2558669664 | DRAFT_00332 | COG2236        | Predicted phosphoribosyltransferases                                 | 6.00E-24 |
| 2558669664 | DRAFT_00332 | pfam00156      | Pribosyltran                                                         | 2.60E-29 |
| 2558669664 | DRAFT_00332 | TIGR01203      | hypoxanthine phosphoribosyltransferase                               | 6.50E-22 |
| 2558669664 | DRAFT_00332 | Locus_type     | CDS                                                                  |          |
| 2558669664 | DRAFT_00332 | Product_name   | Predicted phosphoribosyltransferases                                 |          |
| 2558669664 | DRAFT_00332 | Scaffold       | DRAFT_contig_70_37_len_56021_read_count_1021764.4                    |          |
| 2558669664 | DRAFT_00332 | Coordinates    | 9936..10430(-)                                                       |          |
| 2558669664 | DRAFT_00332 | DNA_length     | 495bp                                                                |          |
| 2558669664 | DRAFT_00332 | Protein_length | 164aa                                                                |          |
| 2558669664 | DRAFT_00332 | GC             |                                                                      | 0.56     |
| 2558669665 | DRAFT_00333 | COG_category   | [S] Function unknown                                                 |          |
| 2558669665 | DRAFT_00333 | COG1917        | Uncharacterized conserved protein, contains double-stranded beta-hel | 4.00E-20 |
| 2558669665 | DRAFT_00333 | pfam07883      | Cupin_2                                                              | 1.20E-22 |
| 2558669665 | DRAFT_00333 | Locus_type     | CDS                                                                  |          |
| 2558669665 | DRAFT_00333 | Product_name   | Uncharacterized conserved protein, contains double-stranded beta-hel |          |
| 2558669665 | DRAFT_00333 | Scaffold       | DRAFT_contig_70_37_len_56021_read_count_1021764.4                    |          |
| 2558669665 | DRAFT_00333 | Coordinates    | 10601..10978(-)                                                      |          |
| 2558669665 | DRAFT_00333 | DNA_length     | 378bp                                                                |          |
| 2558669665 | DRAFT_00333 | Protein_length | 125aa                                                                |          |
| 2558669665 | DRAFT_00333 | GC             |                                                                      | 0.51     |
| 2558669666 | DRAFT_00334 | COG_category   | [R] General function prediction only                                 |          |

|            |             |                |                                                                            |          |
|------------|-------------|----------------|----------------------------------------------------------------------------|----------|
| 2558669666 | DRAFT_00334 | COG0656        | Aldo/keto reductases, related to diketogulonate reductase                  | 3.00E-66 |
| 2558669666 | DRAFT_00334 | pfam00248      | Aldo_ket_red                                                               | 1.30E-61 |
| 2558669666 | DRAFT_00334 | Locus_type     | CDS                                                                        |          |
| 2558669666 | DRAFT_00334 | Product_name   | Aldo/keto reductases, related to diketogulonate reductase                  |          |
| 2558669666 | DRAFT_00334 | Scaffold       | DRAFT_contig_70_37_len_56021_read_count_1021764.4                          |          |
| 2558669666 | DRAFT_00334 | Coordinates    | 11051..11884(-)                                                            |          |
| 2558669666 | DRAFT_00334 | DNA_length     | 834bp                                                                      |          |
| 2558669666 | DRAFT_00334 | Protein_length | 277aa                                                                      |          |
| 2558669666 | DRAFT_00334 | GC             |                                                                            | 0.56     |
|            |             |                |                                                                            |          |
| 2558669667 | DRAFT_00335 | Locus_type     | tRNA                                                                       |          |
| 2558669667 | DRAFT_00335 | Product_name   | tRNA_Val_TAC                                                               |          |
| 2558669667 | DRAFT_00335 | Scaffold       | DRAFT_contig_70_37_len_56021_read_count_1021764.4                          |          |
| 2558669667 | DRAFT_00335 | Coordinates    | 12032..12122(-)                                                            |          |
| 2558669667 | DRAFT_00335 | DNA_length     | 91bp                                                                       |          |
| 2558669667 | DRAFT_00335 | GC             |                                                                            | 0.67     |
|            |             |                |                                                                            |          |
| 2558669668 | DRAFT_00336 | KEGG_module    | M00346: Formaldehyde assimilation, serine pathway                          |          |
| 2558669668 | DRAFT_00336 | KEGG_module    | M00002: Glycolysis, core module involving three-carbon compounds           |          |
| 2558669668 | DRAFT_00336 | KEGG_module    | M00394: RNA degradosome                                                    |          |
| 2558669668 | DRAFT_00336 | KEGG_module    | M00001: Glycolysis (Embden-Meyerhof pathway), glucose => pyruvate          |          |
| 2558669668 | DRAFT_00336 | KEGG_module    | M00003: Gluconeogenesis, oxaloacetate => fructose-6P                       |          |
| 2558669668 | DRAFT_00336 | Metacyc        | ANAGLYCOLYSIS-PWY: glycolysis III (glucokinase)                            |          |
| 2558669668 | DRAFT_00336 | Metacyc        | P122-PWY: heterolactic fermentation                                        |          |
| 2558669668 | DRAFT_00336 | Metacyc        | PWY-5484: glycolysis II (from fructose-6P)                                 |          |
| 2558669668 | DRAFT_00336 | Metacyc        | P124-PWY: Bifidobacterium shunt                                            |          |
| 2558669668 | DRAFT_00336 | Metacyc        | PWY-6901: xylose degradation IV                                            |          |
| 2558669668 | DRAFT_00336 | Metacyc        | PWY-7124: ethylene biosynthesis V                                          |          |
| 2558669668 | DRAFT_00336 | Metacyc        | PWY-1042: glycolysis IV (plant cytosol)                                    |          |
| 2558669668 | DRAFT_00336 | Metacyc        | PWY-6142: gluconeogenesis II (<i>Methanobacterium thermoautotrophicum</i>) |          |
| 2558669668 | DRAFT_00336 | Metacyc        | PWY-5723: Rubisco shunt                                                    |          |
| 2558669668 | DRAFT_00336 | Metacyc        | PWY-1622: formaldehyde assimilation I (serine pathway)                     |          |
| 2558669668 | DRAFT_00336 | Metacyc        | P341-PWY: glycolysis V (Pyrococcus)                                        |          |
| 2558669668 | DRAFT_00336 | Metacyc        | ANARESP1-PWY: respiration (anaerobic)                                      |          |

|            |             |                |                                                                 |           |
|------------|-------------|----------------|-----------------------------------------------------------------|-----------|
| 2558669668 | DRAFT_00336 | Metacyc        | PWY-2221: Entner-Doudoroff pathway III (semi-phosphorylative)   |           |
| 2558669668 | DRAFT_00336 | Metacyc        | GLUCONEO-PWY: gluconeogenesis I                                 |           |
| 2558669668 | DRAFT_00336 | Metacyc        | PWY-6886: 1-butanol autotrophic biosynthesis                    |           |
| 2558669668 | DRAFT_00336 | Metacyc        | PWY-7003: glycerol degradation to butanol                       |           |
| 2558669668 | DRAFT_00336 | Metacyc        | GLYCOLYSIS: glycolysis I                                        |           |
| 2558669668 | DRAFT_00336 | Metacyc        | NPGLUCAT-PWY: Entner-Doudoroff pathway II (non-phosphorylative) |           |
| 2558669668 | DRAFT_00336 | IMG_pathway    | 336: Standard Embden-Meyerhof pathway                           |           |
| 2558669668 | DRAFT_00336 | IMG_pathway    | 337: Embden-Meyerhof pathway without bisphosphoglycerate        |           |
| 2558669668 | DRAFT_00336 | IMG_pathway    | 358: Conversion of glyceraldehyde to pyruvate                   |           |
| 2558669668 | DRAFT_00336 | IMG_pathway    | 359: Conversion of glyceraldehyde-3-phosphate to pyruvate       |           |
| 2558669668 | DRAFT_00336 | IMG_pathway    | 959: Serine cycle                                               |           |
| 2558669668 | DRAFT_00336 | COG_category   | [G] Carbohydrate transport and metabolism                       |           |
| 2558669668 | DRAFT_00336 | COG0148        | Enolase                                                         | 0.00E+00  |
| 2558669668 | DRAFT_00336 | pfam00113      | Enolase_C                                                       | 2.70E-111 |
| 2558669668 | DRAFT_00336 | pfam03952      | Enolase_N                                                       | 3.80E-56  |
| 2558669668 | DRAFT_00336 | EC:4.2.1.11    | Phosphopyruvate hydratase.                                      |           |
| 2558669668 | DRAFT_00336 | TIGR01060      | phosphopyruvate hydratase                                       | 0.00E+00  |
| 2558669668 | DRAFT_00336 | KO:K01689      | enolase [EC:4.2.1.11]                                           | 0.00E+00  |
| 2558669668 | DRAFT_00336 | ITERM:01479    | enolase (EC 4.2.1.11)                                           |           |
| 2558669668 | DRAFT_00336 | Locus_type     | CDS                                                             |           |
| 2558669668 | DRAFT_00336 | Product_name   | enolase (EC 4.2.1.11)                                           |           |
| 2558669668 | DRAFT_00336 | Scaffold       | DRAFT_contig_70_37_len_56021_read_count_1021764.4               |           |
| 2558669668 | DRAFT_00336 | Coordinates    | 12235..13533(+)                                                 |           |
| 2558669668 | DRAFT_00336 | DNA_length     | 1299bp                                                          |           |
| 2558669668 | DRAFT_00336 | Protein_length | 432aa                                                           |           |
| 2558669668 | DRAFT_00336 | GC             |                                                                 | 0.58      |
| 2558669669 | DRAFT_00337 | Locus_type     | tRNA                                                            |           |
| 2558669669 | DRAFT_00337 | Product_name   | tRNA_Pseudo_GGT                                                 |           |
| 2558669669 | DRAFT_00337 | Scaffold       | DRAFT_contig_70_37_len_56021_read_count_1021764.4               |           |
| 2558669669 | DRAFT_00337 | Coordinates    | 13551..13665(-)                                                 |           |
| 2558669669 | DRAFT_00337 | DNA_length     | 88bp                                                            |           |
| 2558669669 | DRAFT_00337 | GC             |                                                                 | 0.64      |

|            |             |                |                                                                         |          |
|------------|-------------|----------------|-------------------------------------------------------------------------|----------|
| 2558669670 | DRAFT_00338 | Locus_type     | miscRNA                                                                 |          |
| 2558669670 | DRAFT_00338 | Product_name   | Archaeal signal recognition particle RNA                                |          |
| 2558669670 | DRAFT_00338 | Scaffold       | DRAFT_contig_70_37_len_56021_read_count_1021764.4                       |          |
| 2558669670 | DRAFT_00338 | Coordinates    | 13710..14022(-)                                                         |          |
| 2558669670 | DRAFT_00338 | DNA_length     | 313bp                                                                   |          |
| 2558669670 | DRAFT_00338 | GC             |                                                                         | 0.66     |
| 2558669671 | DRAFT_00339 | COG_category   | [D] Cell cycle control, cell division, chromosome partitioning          |          |
| 2558669671 | DRAFT_00339 | COG0037        | Predicted ATPase of the PP-loop superfamily implicated in cell cycle co | 2.00E-43 |
| 2558669671 | DRAFT_00339 | pfam01171      | ATP_bind_3                                                              | 2.80E-17 |
| 2558669671 | DRAFT_00339 | TIGR00269      | TIGR00269 family protein                                                | 1.40E-24 |
| 2558669671 | DRAFT_00339 | Locus_type     | CDS                                                                     |          |
| 2558669671 | DRAFT_00339 | Product_name   | TIGR00269 family protein                                                |          |
| 2558669671 | DRAFT_00339 | Scaffold       | DRAFT_contig_70_37_len_56021_read_count_1021764.4                       |          |
| 2558669671 | DRAFT_00339 | Coordinates    | 14038..14970(-)                                                         |          |
| 2558669671 | DRAFT_00339 | DNA_length     | 933bp                                                                   |          |
| 2558669671 | DRAFT_00339 | Protein_length | 310aa                                                                   |          |
| 2558669671 | DRAFT_00339 | GC             |                                                                         | 0.58     |
| 2558669672 | DRAFT_00340 | pfam13180      | PDZ_2                                                                   | 5.20E-09 |
| 2558669672 | DRAFT_00340 | pfam02163      | Peptidase_M50                                                           | 4.80E-25 |
| 2558669672 | DRAFT_00340 | Locus_type     | CDS                                                                     |          |
| 2558669672 | DRAFT_00340 | Product_name   | Trypsin-like serine proteases, typically periplasmic, contain C-termina |          |
| 2558669672 | DRAFT_00340 | Scaffold       | DRAFT_contig_70_37_len_56021_read_count_1021764.4                       |          |
| 2558669672 | DRAFT_00340 | Coordinates    | 15049..16656(+)                                                         |          |
| 2558669672 | DRAFT_00340 | DNA_length     | 1608bp                                                                  |          |
| 2558669672 | DRAFT_00340 | Protein_length | 535aa                                                                   |          |
| 2558669672 | DRAFT_00340 | GC             |                                                                         | 0.58     |
| 2558669672 | DRAFT_00340 | Transmembrane  | Yes                                                                     |          |
| 2558669673 | DRAFT_00341 | COG_category   | [R] General function prediction only                                    |          |
| 2558669673 | DRAFT_00341 | COG1537        | Predicted RNA-binding proteins                                          | 3.00E-50 |
| 2558669673 | DRAFT_00341 | pfam03464      | eRF1_2                                                                  | 2.40E-11 |
| 2558669673 | DRAFT_00341 | pfam03465      | eRF1_3                                                                  | 4.50E-11 |

|            |             |                |                                                   |          |
|------------|-------------|----------------|---------------------------------------------------|----------|
| 2558669673 | DRAFT_00341 | pfam03463      | eRF1_1                                            | 9.40E-18 |
| 2558669673 | DRAFT_00341 | TIGR00111      | mRNA surveillance protein pelota                  | 4.20E-52 |
| 2558669673 | DRAFT_00341 | KO:K06965      | protein pelota                                    | 0.00E+00 |
| 2558669673 | DRAFT_00341 | Locus_type     | CDS                                               |          |
| 2558669673 | DRAFT_00341 | Product_name   | Predicted RNA-binding proteins                    |          |
| 2558669673 | DRAFT_00341 | Scaffold       | DRAFT_contig_70_37_len_56021_read_count_1021764.4 |          |
| 2558669673 | DRAFT_00341 | Coordinates    | 16946..18004(-)                                   |          |
| 2558669673 | DRAFT_00341 | DNA_length     | 1059bp                                            |          |
| 2558669673 | DRAFT_00341 | Protein_length | 352aa                                             |          |
| 2558669673 | DRAFT_00341 | GC             |                                                   | 0.58     |
| 2558669674 | DRAFT_00342 | pfam13662      | Toprim_4                                          | 4.30E-08 |
| 2558669674 | DRAFT_00342 | Locus_type     | CDS                                               |          |
| 2558669674 | DRAFT_00342 | Product_name   | DNA primase (bacterial type)                      |          |
| 2558669674 | DRAFT_00342 | Scaffold       | DRAFT_contig_70_37_len_56021_read_count_1021764.4 |          |
| 2558669674 | DRAFT_00342 | Coordinates    | 18014..19186(-)                                   |          |
| 2558669674 | DRAFT_00342 | DNA_length     | 1173bp                                            |          |
| 2558669674 | DRAFT_00342 | Protein_length | 390aa                                             |          |
| 2558669674 | DRAFT_00342 | GC             |                                                   | 0.57     |
| 2558669675 | DRAFT_00343 | Locus_type     | CDS                                               |          |
| 2558669675 | DRAFT_00343 | Product_name   | hypothetical protein                              |          |
| 2558669675 | DRAFT_00343 | Scaffold       | DRAFT_contig_70_37_len_56021_read_count_1021764.4 |          |
| 2558669675 | DRAFT_00343 | Coordinates    | 19394..20035(+)                                   |          |
| 2558669675 | DRAFT_00343 | DNA_length     | 642bp                                             |          |
| 2558669675 | DRAFT_00343 | Protein_length | 213aa                                             |          |
| 2558669675 | DRAFT_00343 | GC             |                                                   | 0.51     |
| 2558669675 | DRAFT_00343 | Transmembrane  | Yes                                               |          |
| 2558669676 | DRAFT_00344 | Locus_type     | CDS                                               |          |
| 2558669676 | DRAFT_00344 | Product_name   | hypothetical protein                              |          |
| 2558669676 | DRAFT_00344 | Scaffold       | DRAFT_contig_70_37_len_56021_read_count_1021764.4 |          |
| 2558669676 | DRAFT_00344 | Coordinates    | 20032..20166(-)                                   |          |
| 2558669676 | DRAFT_00344 | DNA_length     | 135bp                                             |          |

|            |             |                |                                                     |          |
|------------|-------------|----------------|-----------------------------------------------------|----------|
| 2558669676 | DRAFT_00344 | Protein_length | 44aa                                                |          |
| 2558669676 | DRAFT_00344 | GC             |                                                     | 0.46     |
| 2558669677 | DRAFT_00345 | COG_category   | [L] Replication, recombination and repair           |          |
| 2558669677 | DRAFT_00345 | COG3316        | Transposase and inactivated derivatives             | 1.00E-12 |
| 2558669677 | DRAFT_00345 | pfam04434      | SWIM                                                | 3.20E-04 |
| 2558669677 | DRAFT_00345 | pfam13610      | DDE_Tnp_IS240                                       | 2.30E-19 |
| 2558669677 | DRAFT_00345 | Locus_type     | CDS                                                 |          |
| 2558669677 | DRAFT_00345 | Product_name   | Transposase and inactivated derivatives             |          |
| 2558669677 | DRAFT_00345 | Scaffold       | DRAFT_contig_70_37_len_56021_read_count_1021764.4   |          |
| 2558669677 | DRAFT_00345 | Coordinates    | 20288..21493(+)                                     |          |
| 2558669677 | DRAFT_00345 | DNA_length     | 1206bp                                              |          |
| 2558669677 | DRAFT_00345 | Protein_length | 401aa                                               |          |
| 2558669677 | DRAFT_00345 | GC             |                                                     | 0.55     |
| 2558669678 | DRAFT_00346 | COG_category   | [L] Replication, recombination and repair           |          |
| 2558669678 | DRAFT_00346 | COG1658        | Small primase-like proteins (Toprim domain)         | 2.00E-07 |
| 2558669678 | DRAFT_00346 | Locus_type     | CDS                                                 |          |
| 2558669678 | DRAFT_00346 | Product_name   | Small primase-like proteins (Toprim domain)         |          |
| 2558669678 | DRAFT_00346 | Scaffold       | DRAFT_contig_70_37_len_56021_read_count_1021764.4   |          |
| 2558669678 | DRAFT_00346 | Coordinates    | 21871..22266(-)                                     |          |
| 2558669678 | DRAFT_00346 | DNA_length     | 396bp                                               |          |
| 2558669678 | DRAFT_00346 | Protein_length | 131aa                                               |          |
| 2558669678 | DRAFT_00346 | GC             |                                                     | 0.57     |
| 2558669679 | DRAFT_00347 | KEGG_module    | M00360: Aminoacyl-tRNA biosynthesis, prokaryotes    |          |
| 2558669679 | DRAFT_00347 | KEGG_module    | M00359: Aminoacyl-tRNA biosynthesis, eukaryotes     |          |
| 2558669679 | DRAFT_00347 | Metacyc        | TRNA-CHARGING-PWY: tRNA charging                    |          |
| 2558669679 | DRAFT_00347 | COG_category   | [J] Translation, ribosomal structure and biogenesis |          |
| 2558669679 | DRAFT_00347 | COG0072        | Phenylalanyl-tRNA synthetase beta subunit           | 3.00E-79 |
| 2558669679 | DRAFT_00347 | pfam03484      | B5                                                  | 2.70E-10 |
| 2558669679 | DRAFT_00347 | pfam03483      | B3_4                                                | 1.10E-10 |
| 2558669679 | DRAFT_00347 | EC:6.1.1.20    | Phenylalanine--tRNA ligase.                         |          |
| 2558669679 | DRAFT_00347 | TIGR00471      | phenylalanyl-tRNA synthetase, beta subunit          | 0.00E+00 |

|            |             |                |                                                           |           |
|------------|-------------|----------------|-----------------------------------------------------------|-----------|
| 2558669679 | DRAFT_00347 | KO:K01890      | phenylalanyl-tRNA synthetase beta chain [EC:6.1.1.20]     | 0.00E+00  |
| 2558669679 | DRAFT_00347 | ITERM:00403    | phenylalanyl-tRNA synthetase beta subunit (EC 6.1.1.20)   |           |
| 2558669679 | DRAFT_00347 | Locus_type     | CDS                                                       |           |
| 2558669679 | DRAFT_00347 | Product_name   | phenylalanyl-tRNA synthetase beta subunit (EC 6.1.1.20)   |           |
| 2558669679 | DRAFT_00347 | Scaffold       | DRAFT_contig_70_37_len_56021_read_count_1021764.4         |           |
| 2558669679 | DRAFT_00347 | Coordinates    | 22486..24120(-)                                           |           |
| 2558669679 | DRAFT_00347 | DNA_length     | 1635bp                                                    |           |
| 2558669679 | DRAFT_00347 | Protein_length | 544aa                                                     |           |
| 2558669679 | DRAFT_00347 | GC             |                                                           | 0.6       |
| 2558669680 | DRAFT_00348 | KEGG_module    | M00360: Aminoacyl-tRNA biosynthesis, prokaryotes          |           |
| 2558669680 | DRAFT_00348 | KEGG_module    | M00359: Aminoacyl-tRNA biosynthesis, eukaryotes           |           |
| 2558669680 | DRAFT_00348 | Metacyc        | TRNA-CHARGING-PWY: tRNA charging                          |           |
| 2558669680 | DRAFT_00348 | COG_category   | [J] Translation, ribosomal structure and biogenesis       |           |
| 2558669680 | DRAFT_00348 | COG0016        | Phenylalanyl-tRNA synthetase alpha subunit                | 2.00E-80  |
| 2558669680 | DRAFT_00348 | pfam01409      | tRNA-synt_2d                                              | 1.50E-81  |
| 2558669680 | DRAFT_00348 | EC:6.1.1.20    | Phenylalanine--tRNA ligase.                               |           |
| 2558669680 | DRAFT_00348 | TIGR00468      | phenylalanyl-tRNA synthetase, alpha subunit               | 2.00E-110 |
| 2558669680 | DRAFT_00348 | KO:K01889      | phenylalanyl-tRNA synthetase alpha chain [EC:6.1.1.20]    | 0.00E+00  |
| 2558669680 | DRAFT_00348 | ITERM:01968    | phenylalanyl-tRNA synthetase, alpha subunit (EC 6.1.1.20) |           |
| 2558669680 | DRAFT_00348 | Locus_type     | CDS                                                       |           |
| 2558669680 | DRAFT_00348 | Product_name   | phenylalanyl-tRNA synthetase, alpha subunit (EC 6.1.1.20) |           |
| 2558669680 | DRAFT_00348 | Scaffold       | DRAFT_contig_70_37_len_56021_read_count_1021764.4         |           |
| 2558669680 | DRAFT_00348 | Coordinates    | 24107..25591(-)                                           |           |
| 2558669680 | DRAFT_00348 | DNA_length     | 1485bp                                                    |           |
| 2558669680 | DRAFT_00348 | Protein_length | 494aa                                                     |           |
| 2558669680 | DRAFT_00348 | GC             |                                                           | 0.58      |
| 2558669681 | DRAFT_00349 | KEGG_module    | M00360: Aminoacyl-tRNA biosynthesis, prokaryotes          |           |
| 2558669681 | DRAFT_00349 | KEGG_module    | M00359: Aminoacyl-tRNA biosynthesis, eukaryotes           |           |
| 2558669681 | DRAFT_00349 | Metacyc        | TRNA-CHARGING-PWY: tRNA charging                          |           |
| 2558669681 | DRAFT_00349 | IMG_pathway    | 506: L-tryptophan ligation to tRNA(Trp)                   |           |
| 2558669681 | DRAFT_00349 | COG_category   | [J] Translation, ribosomal structure and biogenesis       |           |
| 2558669681 | DRAFT_00349 | COG0180        | Tryptophanyl-tRNA synthetase                              | 6.00E-63  |



|            |             |                |                                                        |          |
|------------|-------------|----------------|--------------------------------------------------------|----------|
| 2558669681 | DRAFT_00349 | pfam00579      | tRNA-synt_1b                                           | 6.00E-32 |
| 2558669681 | DRAFT_00349 | EC:6.1.1.2     | Tryptophan--tRNA ligase.                               |          |
| 2558669681 | DRAFT_00349 | TIGR00233      | tryptophanyl-tRNA synthetase                           | 1.60E-72 |
| 2558669681 | DRAFT_00349 | KO:K01867      | tryptophanyl-tRNA synthetase [EC:6.1.1.2]              | 0.00E+00 |
| 2558669681 | DRAFT_00349 | ITERM:00401    | tryptophanyl-tRNA synthetase (EC 6.1.1.2)              |          |
| 2558669681 | DRAFT_00349 | Locus_type     | CDS                                                    |          |
| 2558669681 | DRAFT_00349 | Product_name   | tryptophanyl-tRNA synthetase (EC 6.1.1.2)              |          |
| 2558669681 | DRAFT_00349 | Scaffold       | DRAFT_contig_70_37_len_56021_read_count_1021764.4      |          |
| 2558669681 | DRAFT_00349 | Coordinates    | 25597..26727(-)                                        |          |
| 2558669681 | DRAFT_00349 | DNA_length     | 1131bp                                                 |          |
| 2558669681 | DRAFT_00349 | Protein_length | 376aa                                                  |          |
| 2558669681 | DRAFT_00349 | GC             |                                                        | 0.57     |
| 2558669682 | DRAFT_00350 | KEGG_module    | M00120: Coenzyme A biosynthesis, pantothenate => CoA   |          |
| 2558669682 | DRAFT_00350 | Metacyc        | COA-PWY: coenzyme A biosynthesis                       |          |
| 2558669682 | DRAFT_00350 | COG_category   | [R] General function prediction only                   |          |
| 2558669682 | DRAFT_00350 | COG1019        | Predicted nucleotidyltransferase                       | 2.00E-40 |
| 2558669682 | DRAFT_00350 | pfam01467      | CTP_transf_2                                           | 1.40E-11 |
| 2558669682 | DRAFT_00350 | EC:2.7.7.3     | Pantetheine-phosphate adenylyltransferase.             |          |
| 2558669682 | DRAFT_00350 | TIGR00125      | cytidyltransferase-like domain                         | 1.20E-15 |
| 2558669682 | DRAFT_00350 | KO:K02201      | pantetheine-phosphate adenylyltransferase [EC:2.7.7.3] | 1.10E-32 |
| 2558669682 | DRAFT_00350 | Locus_type     | CDS                                                    |          |
| 2558669682 | DRAFT_00350 | Product_name   | cytidyltransferase-like domain                         |          |
| 2558669682 | DRAFT_00350 | Scaffold       | DRAFT_contig_70_37_len_56021_read_count_1021764.4      |          |
| 2558669682 | DRAFT_00350 | Coordinates    | 26777..27256(-)                                        |          |
| 2558669682 | DRAFT_00350 | DNA_length     | 480bp                                                  |          |
| 2558669682 | DRAFT_00350 | Protein_length | 159aa                                                  |          |
| 2558669682 | DRAFT_00350 | GC             |                                                        | 0.58     |
| 2558669683 | DRAFT_00351 | COG_category   | [J] Translation, ribosomal structure and biogenesis    |          |
| 2558669683 | DRAFT_00351 | COG0024        | Methionine aminopeptidase                              | 3.00E-37 |
| 2558669683 | DRAFT_00351 | pfam00557      | Peptidase_M24                                          | 5.20E-30 |
| 2558669683 | DRAFT_00351 | EC:3.4.11.18   | Methionyl aminopeptidase.                              |          |
| 2558669683 | DRAFT_00351 | TIGR00501      | methionine aminopeptidase, type II                     | 1.50E-72 |

|            |             |                |                                                   |           |
|------------|-------------|----------------|---------------------------------------------------|-----------|
| 2558669683 | DRAFT_00351 | KO:K01265      | methionyl aminopeptidase [EC:3.4.11.18]           | 0.00E+00  |
| 2558669683 | DRAFT_00351 | Locus_type     | CDS                                               |           |
| 2558669683 | DRAFT_00351 | Product_name   | methionine aminopeptidase, type II                |           |
| 2558669683 | DRAFT_00351 | Scaffold       | DRAFT_contig_70_37_len_56021_read_count_1021764.4 |           |
| 2558669683 | DRAFT_00351 | Coordinates    | 27427..28233(+)                                   |           |
| 2558669683 | DRAFT_00351 | DNA_length     | 807bp                                             |           |
| 2558669683 | DRAFT_00351 | Protein_length | 268aa                                             |           |
| 2558669683 | DRAFT_00351 | GC             |                                                   | 0.59      |
| 2558669684 | DRAFT_00352 | Locus_type     | CDS                                               |           |
| 2558669684 | DRAFT_00352 | Product_name   | hypothetical protein                              |           |
| 2558669684 | DRAFT_00352 | Scaffold       | DRAFT_contig_70_37_len_56021_read_count_1021764.4 |           |
| 2558669684 | DRAFT_00352 | Coordinates    | 28225..28428(-)                                   |           |
| 2558669684 | DRAFT_00352 | DNA_length     | 204bp                                             |           |
| 2558669684 | DRAFT_00352 | Protein_length | 67aa                                              |           |
| 2558669684 | DRAFT_00352 | GC             |                                                   | 0.53      |
| 2558669685 | DRAFT_00353 | COG_category   | [S] Function unknown                              |           |
| 2558669685 | DRAFT_00353 | COG4046        | Uncharacterized protein conserved in archaea      | 1.00E-79  |
| 2558669685 | DRAFT_00353 | pfam07431      | DUF1512                                           | 7.30E-101 |
| 2558669685 | DRAFT_00353 | Locus_type     | CDS                                               |           |
| 2558669685 | DRAFT_00353 | Product_name   | Uncharacterized protein conserved in archaea      |           |
| 2558669685 | DRAFT_00353 | Scaffold       | DRAFT_contig_70_37_len_56021_read_count_1021764.4 |           |
| 2558669685 | DRAFT_00353 | Coordinates    | 28425..29546(-)                                   |           |
| 2558669685 | DRAFT_00353 | DNA_length     | 1122bp                                            |           |
| 2558669685 | DRAFT_00353 | Protein_length | 373aa                                             |           |
| 2558669685 | DRAFT_00353 | GC             |                                                   | 0.55      |
| 2558669685 | DRAFT_00353 | Transmembrane  | Yes                                               |           |
| 2558669686 | DRAFT_00354 | Locus_type     | rRNA                                              |           |
| 2558669686 | DRAFT_00354 | Gene_symbol    | 5S                                                |           |
| 2558669686 | DRAFT_00354 | Product_name   | 5S rRNA. Archaeal TSU                             |           |
| 2558669686 | DRAFT_00354 | Scaffold       | DRAFT_contig_70_37_len_56021_read_count_1021764.4 |           |
| 2558669686 | DRAFT_00354 | Coordinates    | 29633..29752(-)                                   |           |

|            |             |                |                                                   |           |
|------------|-------------|----------------|---------------------------------------------------|-----------|
| 2558669686 | DRAFT_00354 | DNA_length     | 120bp                                             |           |
| 2558669686 | DRAFT_00354 | GC             |                                                   | 0.62      |
| 2558669687 | DRAFT_00355 | COG_category   | [S] Function unknown                              |           |
| 2558669687 | DRAFT_00355 | COG2835        | Uncharacterized conserved protein                 | 2.00E-10  |
| 2558669687 | DRAFT_00355 | pfam03966      | Trm112p                                           | 2.30E-10  |
| 2558669687 | DRAFT_00355 | Locus_type     | CDS                                               |           |
| 2558669687 | DRAFT_00355 | Product_name   | Uncharacterized conserved protein                 |           |
| 2558669687 | DRAFT_00355 | Scaffold       | DRAFT_contig_70_37_len_56021_read_count_1021764.4 |           |
| 2558669687 | DRAFT_00355 | Coordinates    | 29812..30102(+)                                   |           |
| 2558669687 | DRAFT_00355 | DNA_length     | 291bp                                             |           |
| 2558669687 | DRAFT_00355 | Protein_length | 96aa                                              |           |
| 2558669687 | DRAFT_00355 | GC             |                                                   | 0.54      |
| 2558669688 | DRAFT_00356 | COG_category   | [R] General function prediction only              |           |
| 2558669688 | DRAFT_00356 | COG2403        | Predicted GTPase                                  | 2.00E-122 |
| 2558669688 | DRAFT_00356 | pfam02492      | cobW                                              | 4.10E-05  |
| 2558669688 | DRAFT_00356 | Locus_type     | CDS                                               |           |
| 2558669688 | DRAFT_00356 | Product_name   | Predicted GTPase                                  |           |
| 2558669688 | DRAFT_00356 | Scaffold       | DRAFT_contig_70_37_len_56021_read_count_1021764.4 |           |
| 2558669688 | DRAFT_00356 | Coordinates    | 30191..31507(+)                                   |           |
| 2558669688 | DRAFT_00356 | DNA_length     | 1317bp                                            |           |
| 2558669688 | DRAFT_00356 | Protein_length | 438aa                                             |           |
| 2558669688 | DRAFT_00356 | GC             |                                                   | 0.56      |
| 2558669689 | DRAFT_00357 | Locus_type     | tRNA                                              |           |
| 2558669689 | DRAFT_00357 | Product_name   | tRNA_Thr_GGT                                      |           |
| 2558669689 | DRAFT_00357 | Scaffold       | DRAFT_contig_70_37_len_56021_read_count_1021764.4 |           |
| 2558669689 | DRAFT_00357 | Coordinates    | 31553..31722(+)                                   |           |
| 2558669689 | DRAFT_00357 | DNA_length     | 76bp                                              |           |
| 2558669689 | DRAFT_00357 | GC             |                                                   | 0.61      |
| 2558669690 | DRAFT_00358 | COG_category   | [S] Function unknown                              |           |
| 2558669690 | DRAFT_00358 | COG1379        | Uncharacterized conserved protein                 | 4.00E-81  |

|            |             |                |                                                   |          |
|------------|-------------|----------------|---------------------------------------------------|----------|
| 2558669690 | DRAFT_00358 | TIGR00375      | TIGR00375 family protein                          | 9.10E-70 |
| 2558669690 | DRAFT_00358 | Locus_type     | CDS                                               |          |
| 2558669690 | DRAFT_00358 | Product_name   | Uncharacterized conserved protein                 |          |
| 2558669690 | DRAFT_00358 | Scaffold       | DRAFT_contig_70_37_len_56021_read_count_1021764.4 |          |
| 2558669690 | DRAFT_00358 | Coordinates    | 31858..33066(-)                                   |          |
| 2558669690 | DRAFT_00358 | DNA_length     | 1209bp                                            |          |
| 2558669690 | DRAFT_00358 | Protein_length | 402aa                                             |          |
| 2558669690 | DRAFT_00358 | GC             |                                                   | 0.57     |
|            |             |                |                                                   |          |
| 2558669691 | DRAFT_00359 | pfam02245      | Pur_DNA_glyco                                     | 8.90E-18 |
| 2558669691 | DRAFT_00359 | Locus_type     | CDS                                               |          |
| 2558669691 | DRAFT_00359 | Product_name   | 3-methyladenine DNA glycosylase                   |          |
| 2558669691 | DRAFT_00359 | Scaffold       | DRAFT_contig_70_37_len_56021_read_count_1021764.4 |          |
| 2558669691 | DRAFT_00359 | Coordinates    | 33325..33474(+)                                   |          |
| 2558669691 | DRAFT_00359 | DNA_length     | 150bp                                             |          |
| 2558669691 | DRAFT_00359 | Protein_length | 49aa                                              |          |
| 2558669691 | DRAFT_00359 | GC             |                                                   | 0.57     |
|            |             |                |                                                   |          |
| 2558669692 | DRAFT_00360 | pfam02245      | Pur_DNA_glyco                                     | 7.60E-13 |
| 2558669692 | DRAFT_00360 | Locus_type     | CDS                                               |          |
| 2558669692 | DRAFT_00360 | Product_name   | 3-methyladenine DNA glycosylase                   |          |
| 2558669692 | DRAFT_00360 | Scaffold       | DRAFT_contig_70_37_len_56021_read_count_1021764.4 |          |
| 2558669692 | DRAFT_00360 | Coordinates    | 33507..33824(+)                                   |          |
| 2558669692 | DRAFT_00360 | DNA_length     | 318bp                                             |          |
| 2558669692 | DRAFT_00360 | Protein_length | 105aa                                             |          |
| 2558669692 | DRAFT_00360 | GC             |                                                   | 0.51     |
|            |             |                |                                                   |          |
| 2558669693 | DRAFT_00361 | Locus_type     | tRNA                                              |          |
| 2558669693 | DRAFT_00361 | Product_name   | tRNA_Pro_TGG                                      |          |
| 2558669693 | DRAFT_00361 | Scaffold       | DRAFT_contig_70_37_len_56021_read_count_1021764.4 |          |
| 2558669693 | DRAFT_00361 | Coordinates    | 33849..33927(+)                                   |          |
| 2558669693 | DRAFT_00361 | DNA_length     | 79bp                                              |          |
| 2558669693 | DRAFT_00361 | GC             |                                                   | 0.63     |

|            |             |                |                                                                                           |          |
|------------|-------------|----------------|-------------------------------------------------------------------------------------------|----------|
| 2558669694 | DRAFT_00362 | KEGG_module    | M00179: Ribosome, archaea                                                                 |          |
| 2558669694 | DRAFT_00362 | KEGG_module    | M00177: Ribosome, eukaryotes                                                              |          |
| 2558669694 | DRAFT_00362 | COG_category   | [J] Translation, ribosomal structure and biogenesis                                       |          |
| 2558669694 | DRAFT_00362 | COG4352        | Ribosomal protein L13E                                                                    | 2.00E-03 |
| 2558669694 | DRAFT_00362 | KO:K02873      | large subunit ribosomal protein L13e                                                      | 2.70E-07 |
| 2558669694 | DRAFT_00362 | Locus_type     | CDS                                                                                       |          |
| 2558669694 | DRAFT_00362 | Product_name   | Ribosomal protein L13E                                                                    |          |
| 2558669694 | DRAFT_00362 | Scaffold       | DRAFT_contig_70_37_len_56021_read_count_1021764.4                                         |          |
| 2558669694 | DRAFT_00362 | Coordinates    | 34036..34506(+)                                                                           |          |
| 2558669694 | DRAFT_00362 | DNA_length     | 471bp                                                                                     |          |
| 2558669694 | DRAFT_00362 | Protein_length | 156aa                                                                                     |          |
| 2558669694 | DRAFT_00362 | GC             |                                                                                           | 0.59     |
| 2558669695 | DRAFT_00363 | KEGG_module    | M00053: Pyrimidine deoxyribonucleotide biosynthesis, CDP/CTP => dCDP/dCTP,dTDP/dTTP       |          |
| 2558669695 | DRAFT_00363 | Metacyc        | PWY-6126: adenosine nucleotides <i>de novo</i> biosynthesis                               |          |
| 2558669695 | DRAFT_00363 | Metacyc        | PWY-7187: pyrimidine deoxyribonucleotides <i>de novo</i> biosynthesis II                  |          |
| 2558669695 | DRAFT_00363 | Metacyc        | PWY-6125: guanosine nucleotides <i>de novo</i> biosynthesis                               |          |
| 2558669695 | DRAFT_00363 | Metacyc        | PWY0-166: superpathway of pyrimidine deoxyribonucleotides <i>de novo</i> biosynthesis (E. |          |
| 2558669695 | DRAFT_00363 | COG_category   | [F] Nucleotide transport and metabolism                                                   |          |
| 2558669695 | DRAFT_00363 | COG1328        | Oxygen-sensitive ribonucleoside-triphosphate reductase                                    | 2.00E-27 |
| 2558669695 | DRAFT_00363 | pfam03477      | ATP-cone                                                                                  | 1.10E-04 |
| 2558669695 | DRAFT_00363 | pfam13597      | NRDD                                                                                      | 4.10E-13 |
| 2558669695 | DRAFT_00363 | EC:1.17.4.2    | Ribonucleoside-triphosphate reductase.                                                    |          |
| 2558669695 | DRAFT_00363 | KO:K00527      | ribonucleoside-triphosphate reductase [EC:1.17.4.2]                                       | 0.00E+00 |
| 2558669695 | DRAFT_00363 | Locus_type     | CDS                                                                                       |          |
| 2558669695 | DRAFT_00363 | Product_name   | Oxygen-sensitive ribonucleoside-triphosphate reductase                                    |          |
| 2558669695 | DRAFT_00363 | Scaffold       | DRAFT_contig_70_37_len_56021_read_count_1021764.4                                         |          |
| 2558669695 | DRAFT_00363 | Coordinates    | 34958..37045(+)                                                                           |          |
| 2558669695 | DRAFT_00363 | DNA_length     | 2088bp                                                                                    |          |
| 2558669695 | DRAFT_00363 | Protein_length | 695aa                                                                                     |          |
| 2558669695 | DRAFT_00363 | GC             |                                                                                           | 0.58     |
| 2558669696 | DRAFT_00364 | KEGG_module    | M00053: Pyrimidine deoxyribonucleotide biosynthesis, CDP/CTP => dCDP/dCTP,dTDP/dTTP       |          |
| 2558669696 | DRAFT_00364 | Metacyc        | PWY-6126: adenosine nucleotides <i>de novo</i> biosynthesis                               |          |

|            |             |                |                                                                                           |           |
|------------|-------------|----------------|-------------------------------------------------------------------------------------------|-----------|
| 2558669696 | DRAFT_00364 | Metacyc        | PWY0-166: superpathway of pyrimidine deoxyribonucleotides <i>de novo</i> biosynthesis (E. |           |
| 2558669696 | DRAFT_00364 | Metacyc        | PWY-6125: guanosine nucleotides <i>de novo</i> biosynthesis                               |           |
| 2558669696 | DRAFT_00364 | Metacyc        | PWY-7184: pyrimidine deoxyribonucleotides <i>de novo</i> biosynthesis I                   |           |
| 2558669696 | DRAFT_00364 | Metacyc        | PWY-7198: pyrimidine deoxyribonucleotides <i>de novo</i> biosynthesis IV                  |           |
| 2558669696 | DRAFT_00364 | Metacyc        | PWY-6545: pyrimidine deoxyribonucleotides <i>de novo</i> biosynthesis III                 |           |
| 2558669696 | DRAFT_00364 | Metacyc        | PWY-7210: pyrimidine deoxyribonucleotides biosynthesis from CTP                           |           |
| 2558669696 | DRAFT_00364 | COG_category   | [F] Nucleotide transport and metabolism                                                   |           |
| 2558669696 | DRAFT_00364 | COG0209        | Ribonucleotide reductase, alpha subunit                                                   | 1.00E-95  |
| 2558669696 | DRAFT_00364 | pfam12637      | TSCPD                                                                                     | 9.00E-22  |
| 2558669696 | DRAFT_00364 | pfam02867      | Ribonuc_red_lgC                                                                           | 1.20E-122 |
| 2558669696 | DRAFT_00364 | pfam00317      | Ribonuc_red_lgN                                                                           | 4.90E-13  |
| 2558669696 | DRAFT_00364 | EC:1.17.4.1    | Ribonucleoside-diphosphate reductase.                                                     |           |
| 2558669696 | DRAFT_00364 | TIGR02504      | ribonucleoside-diphosphate reductase, adenosylcobalamin-dependent                         | 0.00E+00  |
| 2558669696 | DRAFT_00364 | KO:K00525      | ribonucleoside-diphosphate reductase alpha chain [EC:1.17.4.1]                            | 0.00E+00  |
| 2558669696 | DRAFT_00364 | ITERM:00726    | ribonucleoside-diphosphate reductase class II (EC 1.17.4.-)                               |           |
| 2558669696 | DRAFT_00364 | Locus_type     | CDS                                                                                       |           |
| 2558669696 | DRAFT_00364 | Product_name   | ribonucleoside-diphosphate reductase class II (EC 1.17.4.-)                               |           |
| 2558669696 | DRAFT_00364 | Scaffold       | DRAFT_contig_70_37_len_56021_read_count_1021764.4                                         |           |
| 2558669696 | DRAFT_00364 | Coordinates    | 37092..39506(+)                                                                           |           |
| 2558669696 | DRAFT_00364 | DNA_length     | 2415bp                                                                                    |           |
| 2558669696 | DRAFT_00364 | Protein_length | 804aa                                                                                     |           |
| 2558669696 | DRAFT_00364 | GC             |                                                                                           | 0.57      |
| 2558669697 | DRAFT_00365 | Locus_type     | CDS                                                                                       |           |
| 2558669697 | DRAFT_00365 | Product_name   | hypothetical protein                                                                      |           |
| 2558669697 | DRAFT_00365 | Scaffold       | DRAFT_contig_70_37_len_56021_read_count_1021764.4                                         |           |
| 2558669697 | DRAFT_00365 | Coordinates    | 39571..39810(+)                                                                           |           |
| 2558669697 | DRAFT_00365 | DNA_length     | 240bp                                                                                     |           |
| 2558669697 | DRAFT_00365 | Protein_length | 79aa                                                                                      |           |
| 2558669697 | DRAFT_00365 | GC             |                                                                                           | 0.57      |
| 2558669697 | DRAFT_00365 | Transmembrane  | Yes                                                                                       |           |
| 2558669698 | DRAFT_00366 | Locus_type     | CDS                                                                                       |           |
| 2558669698 | DRAFT_00366 | Product_name   | hypothetical protein                                                                      |           |

|            |             |                |                                                                       |          |
|------------|-------------|----------------|-----------------------------------------------------------------------|----------|
| 2558669698 | DRAFT_00366 | Scaffold       | DRAFT_contig_70_37_len_56021_read_count_1021764.4                     |          |
| 2558669698 | DRAFT_00366 | Coordinates    | 39800..39937(-)                                                       |          |
| 2558669698 | DRAFT_00366 | DNA_length     | 138bp                                                                 |          |
| 2558669698 | DRAFT_00366 | Protein_length | 45aa                                                                  |          |
| 2558669698 | DRAFT_00366 | GC             |                                                                       | 0.58     |
|            |             |                |                                                                       |          |
| 2558669699 | DRAFT_00367 | KEGG_module    | M00159: V-type ATPase, prokaryotes                                    |          |
| 2558669699 | DRAFT_00367 | Metacyc        | PWY-6126: adenosine nucleotides <i>de novo</i> biosynthesis           |          |
| 2558669699 | DRAFT_00367 | COG_category   | [C] Energy production and conversion                                  |          |
| 2558669699 | DRAFT_00367 | COG1394        | Archaeal/vacuolar-type H <sup>+</sup> -ATPase subunit D               | 1.00E-37 |
| 2558669699 | DRAFT_00367 | pfam01813      | ATP-synt_D                                                            | 3.40E-53 |
| 2558669699 | DRAFT_00367 | EC:3.6.3.14    | H <sup>(+)</sup> -transporting two-sector ATPase.                     |          |
| 2558669699 | DRAFT_00367 | TIGR00309      | H <sup>(+)</sup> -transporting ATP synthase, vacuolar type, subunit D | 7.60E-43 |
| 2558669699 | DRAFT_00367 | KO:K02120      | V-type H <sup>+</sup> -transporting ATPase subunit D [EC:3.6.3.14]    | 0.00E+00 |
| 2558669699 | DRAFT_00367 | Locus_type     | CDS                                                                   |          |
| 2558669699 | DRAFT_00367 | Product_name   | H <sup>(+)</sup> -transporting ATP synthase, vacuolar type, subunit D |          |
| 2558669699 | DRAFT_00367 | Scaffold       | DRAFT_contig_70_37_len_56021_read_count_1021764.4                     |          |
| 2558669699 | DRAFT_00367 | Coordinates    | 39934..40575(-)                                                       |          |
| 2558669699 | DRAFT_00367 | DNA_length     | 642bp                                                                 |          |
| 2558669699 | DRAFT_00367 | Protein_length | 213aa                                                                 |          |
| 2558669699 | DRAFT_00367 | GC             |                                                                       | 0.59     |
|            |             |                |                                                                       |          |
| 2558669700 | DRAFT_00368 | KEGG_module    | M00159: V-type ATPase, prokaryotes                                    |          |
| 2558669700 | DRAFT_00368 | Metacyc        | PWY-6126: adenosine nucleotides <i>de novo</i> biosynthesis           |          |
| 2558669700 | DRAFT_00368 | COG_category   | [C] Energy production and conversion                                  |          |
| 2558669700 | DRAFT_00368 | COG1156        | Archaeal/vacuolar-type H <sup>+</sup> -ATPase subunit B               | 0.00E+00 |
| 2558669700 | DRAFT_00368 | pfam00306      | ATP-synt_ab_C                                                         | 4.90E-12 |
| 2558669700 | DRAFT_00368 | pfam00006      | ATP-synt_ab                                                           | 2.20E-56 |
| 2558669700 | DRAFT_00368 | pfam02874      | ATP-synt_ab_N                                                         | 4.10E-09 |
| 2558669700 | DRAFT_00368 | EC:3.6.3.14    | H <sup>(+)</sup> -transporting two-sector ATPase.                     |          |
| 2558669700 | DRAFT_00368 | KO:K02118      | V-type H <sup>+</sup> -transporting ATPase subunit B [EC:3.6.3.14]    | 0.00E+00 |
| 2558669700 | DRAFT_00368 | Locus_type     | CDS                                                                   |          |
| 2558669700 | DRAFT_00368 | Product_name   | Archaeal/vacuolar-type H <sup>+</sup> -ATPase subunit B               |          |
| 2558669700 | DRAFT_00368 | Scaffold       | DRAFT_contig_70_37_len_56021_read_count_1021764.4                     |          |

|            |             |                |                                                                    |          |
|------------|-------------|----------------|--------------------------------------------------------------------|----------|
| 2558669700 | DRAFT_00368 | Coordinates    | 40578..41990(-)                                                    |          |
| 2558669700 | DRAFT_00368 | DNA_length     | 1413bp                                                             |          |
| 2558669700 | DRAFT_00368 | Protein_length | 470aa                                                              |          |
| 2558669700 | DRAFT_00368 | GC             |                                                                    | 0.6      |
| 2558669701 | DRAFT_00369 | KEGG_module    | M00159: V-type ATPase, prokaryotes                                 |          |
| 2558669701 | DRAFT_00369 | Metacyc        | PWY-6126: adenosine nucleotides <i>de novo</i> biosynthesis        |          |
| 2558669701 | DRAFT_00369 | COG_category   | [C] Energy production and conversion                               |          |
| 2558669701 | DRAFT_00369 | COG1155        | Archaeal/vacuolar-type H <sup>+</sup> -ATPase subunit A            | 0.00E+00 |
| 2558669701 | DRAFT_00369 | pfam00306      | ATP-synt_ab_C                                                      | 1.20E-15 |
| 2558669701 | DRAFT_00369 | pfam00006      | ATP-synt_ab                                                        | 2.90E-89 |
| 2558669701 | DRAFT_00369 | pfam02874      | ATP-synt_ab_N                                                      | 1.00E-10 |
| 2558669701 | DRAFT_00369 | EC:3.6.3.14    | H <sup>(+)</sup> -transporting two-sector ATPase.                  |          |
| 2558669701 | DRAFT_00369 | KO:K02117      | V-type H <sup>+</sup> -transporting ATPase subunit A [EC:3.6.3.14] | 0.00E+00 |
| 2558669701 | DRAFT_00369 | Locus_type     | CDS                                                                |          |
| 2558669701 | DRAFT_00369 | Product_name   | Archaeal/vacuolar-type H <sup>+</sup> -ATPase subunit A            |          |
| 2558669701 | DRAFT_00369 | Scaffold       | DRAFT_contig_70_37_len_56021_read_count_1021764.4                  |          |
| 2558669701 | DRAFT_00369 | Coordinates    | 41987..43774(-)                                                    |          |
| 2558669701 | DRAFT_00369 | DNA_length     | 1788bp                                                             |          |
| 2558669701 | DRAFT_00369 | Protein_length | 595aa                                                              |          |
| 2558669701 | DRAFT_00369 | GC             |                                                                    | 0.6      |
| 2558669702 | DRAFT_00370 | KEGG_module    | M00159: V-type ATPase, prokaryotes                                 |          |
| 2558669702 | DRAFT_00370 | Metacyc        | PWY-6126: adenosine nucleotides <i>de novo</i> biosynthesis        |          |
| 2558669702 | DRAFT_00370 | COG_category   | [C] Energy production and conversion                               |          |
| 2558669702 | DRAFT_00370 | COG1390        | Archaeal/vacuolar-type H <sup>+</sup> -ATPase subunit E            | 3.00E-13 |
| 2558669702 | DRAFT_00370 | pfam01991      | vATP-synt_E                                                        | 3.00E-26 |
| 2558669702 | DRAFT_00370 | EC:3.6.3.14    | H <sup>(+)</sup> -transporting two-sector ATPase.                  |          |
| 2558669702 | DRAFT_00370 | KO:K02121      | V-type H <sup>+</sup> -transporting ATPase subunit E [EC:3.6.3.14] | 5.10E-27 |
| 2558669702 | DRAFT_00370 | Locus_type     | CDS                                                                |          |
| 2558669702 | DRAFT_00370 | Product_name   | Archaeal/vacuolar-type H <sup>+</sup> -ATPase subunit E            |          |
| 2558669702 | DRAFT_00370 | Scaffold       | DRAFT_contig_70_37_len_56021_read_count_1021764.4                  |          |
| 2558669702 | DRAFT_00370 | Coordinates    | 43991..44587(-)                                                    |          |
| 2558669702 | DRAFT_00370 | DNA_length     | 597bp                                                              |          |



|            |             |                |                                                                    |          |
|------------|-------------|----------------|--------------------------------------------------------------------|----------|
| 2558669702 | DRAFT_00370 | Protein_length | 198aa                                                              |          |
| 2558669702 | DRAFT_00370 | GC             |                                                                    | 0.59     |
| 2558669703 | DRAFT_00371 | KEGG_module    | M00159: V-type ATPase, prokaryotes                                 |          |
| 2558669703 | DRAFT_00371 | Metacyc        | PWY-6126: adenosine nucleotides <i>de novo</i> biosynthesis        |          |
| 2558669703 | DRAFT_00371 | COG_category   | [C] Energy production and conversion                               |          |
| 2558669703 | DRAFT_00371 | COG1436        | Archaeal/vacuolar-type H <sup>+</sup> -ATPase subunit F            | 1.00E-10 |
| 2558669703 | DRAFT_00371 | pfam01990      | ATP-synt_F                                                         | 3.70E-16 |
| 2558669703 | DRAFT_00371 | EC:3.6.3.14    | H(+)-transporting two-sector ATPase.                               |          |
| 2558669703 | DRAFT_00371 | KO:K02122      | V-type H <sup>+</sup> -transporting ATPase subunit F [EC:3.6.3.14] | 4.90E-23 |
| 2558669703 | DRAFT_00371 | Locus_type     | CDS                                                                |          |
| 2558669703 | DRAFT_00371 | Product_name   | Archaeal/vacuolar-type H <sup>+</sup> -ATPase subunit F            |          |
| 2558669703 | DRAFT_00371 | Scaffold       | DRAFT_contig_70_37_len_56021_read_count_1021764.4                  |          |
| 2558669703 | DRAFT_00371 | Coordinates    | 44593..44889(-)                                                    |          |
| 2558669703 | DRAFT_00371 | DNA_length     | 297bp                                                              |          |
| 2558669703 | DRAFT_00371 | Protein_length | 98aa                                                               |          |
| 2558669703 | DRAFT_00371 | GC             |                                                                    | 0.62     |
| 2558669704 | DRAFT_00372 | KEGG_module    | M00159: V-type ATPase, prokaryotes                                 |          |
| 2558669704 | DRAFT_00372 | Metacyc        | PWY-6126: adenosine nucleotides <i>de novo</i> biosynthesis        |          |
| 2558669704 | DRAFT_00372 | EC:3.6.3.14    | H(+)-transporting two-sector ATPase.                               |          |
| 2558669704 | DRAFT_00372 | KO:K02121      | V-type H <sup>+</sup> -transporting ATPase subunit E [EC:3.6.3.14] | 2.30E-06 |
| 2558669704 | DRAFT_00372 | Locus_type     | CDS                                                                |          |
| 2558669704 | DRAFT_00372 | Product_name   | hypothetical protein                                               |          |
| 2558669704 | DRAFT_00372 | Scaffold       | DRAFT_contig_70_37_len_56021_read_count_1021764.4                  |          |
| 2558669704 | DRAFT_00372 | Coordinates    | 44886..45245(-)                                                    |          |
| 2558669704 | DRAFT_00372 | DNA_length     | 360bp                                                              |          |
| 2558669704 | DRAFT_00372 | Protein_length | 119aa                                                              |          |
| 2558669704 | DRAFT_00372 | GC             |                                                                    | 0.53     |
| 2558669705 | DRAFT_00373 | Locus_type     | CDS                                                                |          |
| 2558669705 | DRAFT_00373 | Product_name   | hypothetical protein                                               |          |
| 2558669705 | DRAFT_00373 | Scaffold       | DRAFT_contig_70_37_len_56021_read_count_1021764.4                  |          |
| 2558669705 | DRAFT_00373 | Coordinates    | 45253..45378(-)                                                    |          |

|            |             |                |                                                                  |          |
|------------|-------------|----------------|------------------------------------------------------------------|----------|
| 2558669705 | DRAFT_00373 | DNA_length     | 126bp                                                            |          |
| 2558669705 | DRAFT_00373 | Protein_length | 41aa                                                             |          |
| 2558669705 | DRAFT_00373 | GC             |                                                                  | 0.53     |
| 2558669706 | DRAFT_00374 | Metacyc        | PWY-6087: 4-chlorocatechol degradation                           |          |
| 2558669706 | DRAFT_00374 | Metacyc        | PWY-6089: 3-chlorocatechol degradation I (<i>ortho</i>)          |          |
| 2558669706 | DRAFT_00374 | Metacyc        | PWY-6193: 3-chlorocatechol degradation II (<i>ortho</i>)         |          |
| 2558669706 | DRAFT_00374 | COG_category   | [Q] Secondary metabolites biosynthesis, transport and catabolism |          |
| 2558669706 | DRAFT_00374 | COG0412        | Dienelactone hydrolase and related enzymes                       | 1.00E-39 |
| 2558669706 | DRAFT_00374 | pfam01738      | DLH                                                              | 3.20E-52 |
| 2558669706 | DRAFT_00374 | EC:3.1.1.45    | Carboxymethylenebutenolidase.                                    |          |
| 2558669706 | DRAFT_00374 | KO:K01061      | carboxymethylenebutenolidase [EC:3.1.1.45]                       | 0.00E+00 |
| 2558669706 | DRAFT_00374 | Locus_type     | CDS                                                              |          |
| 2558669706 | DRAFT_00374 | Product_name   | Dienelactone hydrolase and related enzymes                       |          |
| 2558669706 | DRAFT_00374 | Scaffold       | DRAFT_contig_70_37_len_56021_read_count_1021764.4                |          |
| 2558669706 | DRAFT_00374 | Coordinates    | 45398..46216(-)                                                  |          |
| 2558669706 | DRAFT_00374 | DNA_length     | 819bp                                                            |          |
| 2558669706 | DRAFT_00374 | Protein_length | 272aa                                                            |          |
| 2558669706 | DRAFT_00374 | GC             |                                                                  | 0.56     |
| 2558669707 | DRAFT_00375 | Locus_type     | CDS                                                              |          |
| 2558669707 | DRAFT_00375 | Product_name   | hypothetical protein                                             |          |
| 2558669707 | DRAFT_00375 | Scaffold       | DRAFT_contig_70_37_len_56021_read_count_1021764.4                |          |
| 2558669707 | DRAFT_00375 | Coordinates    | 46306..46440(+)                                                  |          |
| 2558669707 | DRAFT_00375 | DNA_length     | 135bp                                                            |          |
| 2558669707 | DRAFT_00375 | Protein_length | 44aa                                                             |          |
| 2558669707 | DRAFT_00375 | GC             |                                                                  | 0.56     |
| 2558669708 | DRAFT_00376 | KEGG_module    | M00029: Urea cycle                                               |          |
| 2558669708 | DRAFT_00376 | Metacyc        | ARGSYN-PWY: arginine biosynthesis I                              |          |
| 2558669708 | DRAFT_00376 | Metacyc        | PWY-4981: proline biosynthesis II (from arginine)                |          |
| 2558669708 | DRAFT_00376 | Metacyc        | CITRULBIO-PWY: citrulline biosynthesis                           |          |
| 2558669708 | DRAFT_00376 | Metacyc        | PWY-4984: urea cycle                                             |          |
| 2558669708 | DRAFT_00376 | Metacyc        | ARGSYNBSUB-PWY: arginine biosynthesis II (acetyl cycle)          |          |

|            |             |                |                                                                         |           |
|------------|-------------|----------------|-------------------------------------------------------------------------|-----------|
| 2558669708 | DRAFT_00376 | Metacyc        | ARGININE-SYN4-PWY: arginine biosynthesis IV                             |           |
| 2558669708 | DRAFT_00376 | Metacyc        | CITRULLINE-DEG-PWY: citrulline degradation                              |           |
| 2558669708 | DRAFT_00376 | COG_category   | [E] Amino acid transport and metabolism                                 |           |
| 2558669708 | DRAFT_00376 | COG0078        | Ornithine carbamoyltransferase                                          | 6.00E-127 |
| 2558669708 | DRAFT_00376 | pfam02729      | OTCace_N                                                                | 6.10E-47  |
| 2558669708 | DRAFT_00376 | pfam00185      | OTCace                                                                  | 4.60E-50  |
| 2558669708 | DRAFT_00376 | EC:2.1.3.3     | Ornithine carbamoyltransferase.                                         |           |
| 2558669708 | DRAFT_00376 | TIGR00658      | ornithine carbamoyltransferase                                          | 2.20E-124 |
| 2558669708 | DRAFT_00376 | KO:K00611      | ornithine carbamoyltransferase [EC:2.1.3.3]                             | 0.00E+00  |
| 2558669708 | DRAFT_00376 | Locus_type     | CDS                                                                     |           |
| 2558669708 | DRAFT_00376 | Product_name   | ornithine carbamoyltransferase (EC 2.1.3.3)                             |           |
| 2558669708 | DRAFT_00376 | Scaffold       | DRAFT_contig_70_37_len_56021_read_count_1021764.4                       |           |
| 2558669708 | DRAFT_00376 | Coordinates    | 46403..47353(-)                                                         |           |
| 2558669708 | DRAFT_00376 | DNA_length     | 951bp                                                                   |           |
| 2558669708 | DRAFT_00376 | Protein_length | 316aa                                                                   |           |
| 2558669708 | DRAFT_00376 | GC             |                                                                         | 0.59      |
| 2558669709 | DRAFT_00377 | COG_category   | [K] Transcription                                                       |           |
| 2558669709 | DRAFT_00377 | COG1308        | Transcription factor homologous to NACalpha-BTF3                        | 3.00E-18  |
| 2558669709 | DRAFT_00377 | pfam01849      | NAC                                                                     | 7.50E-18  |
| 2558669709 | DRAFT_00377 | TIGR00264      | alpha-NAC-related protein                                               | 4.80E-30  |
| 2558669709 | DRAFT_00377 | KO:K03626      | nascent polypeptide-associated complex subunit alpha                    | 1.90E-23  |
| 2558669709 | DRAFT_00377 | ITERM:02070    | Nascent polypeptide associated complex NAC                              |           |
| 2558669709 | DRAFT_00377 | Locus_type     | CDS                                                                     |           |
| 2558669709 | DRAFT_00377 | Product_name   | Nascent polypeptide associated complex NAC                              |           |
| 2558669709 | DRAFT_00377 | Scaffold       | DRAFT_contig_70_37_len_56021_read_count_1021764.4                       |           |
| 2558669709 | DRAFT_00377 | Coordinates    | 47448..47777(-)                                                         |           |
| 2558669709 | DRAFT_00377 | DNA_length     | 330bp                                                                   |           |
| 2558669709 | DRAFT_00377 | Protein_length | 109aa                                                                   |           |
| 2558669709 | DRAFT_00377 | GC             |                                                                         | 0.56      |
| 2558669710 | DRAFT_00378 | COG_category   | [O] Posttranslational modification, protein turnover, chaperones        |           |
| 2558669710 | DRAFT_00378 | COG1370        | Prefoldin, molecular chaperone implicated in de novo protein folding, ε | 2.00E-26  |
| 2558669710 | DRAFT_00378 | pfam01472      | PUA                                                                     | 5.40E-12  |

|            |             |                |                                                                       |          |
|------------|-------------|----------------|-----------------------------------------------------------------------|----------|
| 2558669710 | DRAFT_00378 | pfam14810      | TGT_C2                                                                | 3.20E-13 |
| 2558669710 | DRAFT_00378 | TIGR00451      | uncharacterized domain 2                                              | 9.80E-12 |
| 2558669710 | DRAFT_00378 | KO:K07398      | conserved protein with predicted RNA binding PUA domain               | 1.20E-26 |
| 2558669710 | DRAFT_00378 | Locus_type     | CDS                                                                   |          |
| 2558669710 | DRAFT_00378 | Product_name   | Prefoldin, molecular chaperone implicated in de novo protein folding, |          |
| 2558669710 | DRAFT_00378 | Scaffold       | DRAFT_contig_70_37_len_56021_read_count_1021764.4                     |          |
| 2558669710 | DRAFT_00378 | Coordinates    | 47774..48241(-)                                                       |          |
| 2558669710 | DRAFT_00378 | DNA_length     | 468bp                                                                 |          |
| 2558669710 | DRAFT_00378 | Protein_length | 155aa                                                                 |          |
| 2558669710 | DRAFT_00378 | GC             |                                                                       | 0.6      |
| 2558669711 | DRAFT_00379 | COG_category   | [R] General function prediction only                                  |          |
| 2558669711 | DRAFT_00379 | COG2262        | GTPases                                                               | 3.00E-87 |
| 2558669711 | DRAFT_00379 | pfam13167      | GTP-bdg_N                                                             | 4.00E-12 |
| 2558669711 | DRAFT_00379 | pfam01926      | MMR_HSR1                                                              | 2.60E-16 |
| 2558669711 | DRAFT_00379 | TIGR03156      | GTP-binding protein HflX                                              | 3.00E-93 |
| 2558669711 | DRAFT_00379 | KO:K03665      | GTP-binding protein HflX                                              | 0.00E+00 |
| 2558669711 | DRAFT_00379 | Locus_type     | CDS                                                                   |          |
| 2558669711 | DRAFT_00379 | Product_name   | GTP-binding protein HflX                                              |          |
| 2558669711 | DRAFT_00379 | Scaffold       | DRAFT_contig_70_37_len_56021_read_count_1021764.4                     |          |
| 2558669711 | DRAFT_00379 | Coordinates    | 48276..49469(+)                                                       |          |
| 2558669711 | DRAFT_00379 | DNA_length     | 1194bp                                                                |          |
| 2558669711 | DRAFT_00379 | Protein_length | 397aa                                                                 |          |
| 2558669711 | DRAFT_00379 | GC             |                                                                       | 0.6      |
| 2558669712 | DRAFT_00380 | COG_category   | [S] Function unknown                                                  |          |
| 2558669712 | DRAFT_00380 | COG1303        | Uncharacterized protein conserved in archaea                          | 1.00E-47 |
| 2558669712 | DRAFT_00380 | pfam01994      | Trm56                                                                 | 1.40E-41 |
| 2558669712 | DRAFT_00380 | EC:2.1.1.206   | tRNA (cytidine(56)-2'-O)-methyltransferase.                           |          |
| 2558669712 | DRAFT_00380 | KO:K07254      | tRNA (cytidine56-2'-O)-methyltransferase [EC:2.1.1.206]               | 1.30E-42 |
| 2558669712 | DRAFT_00380 | Locus_type     | CDS                                                                   |          |
| 2558669712 | DRAFT_00380 | Product_name   | Uncharacterized protein conserved in archaea                          |          |
| 2558669712 | DRAFT_00380 | Scaffold       | DRAFT_contig_70_37_len_56021_read_count_1021764.4                     |          |
| 2558669712 | DRAFT_00380 | Coordinates    | 49466..49993(+)                                                       |          |

|            |             |                |                                                                  |          |
|------------|-------------|----------------|------------------------------------------------------------------|----------|
| 2558669712 | DRAFT_00380 | DNA_length     | 528bp                                                            |          |
| 2558669712 | DRAFT_00380 | Protein_length | 175aa                                                            |          |
| 2558669712 | DRAFT_00380 | GC             |                                                                  | 0.58     |
| 2558669713 | DRAFT_00381 | COG_category   | [K] Transcription                                                |          |
| 2558669713 | DRAFT_00381 | COG1675        | Transcription initiation factor IIE, alpha subunit               | 5.00E-26 |
| 2558669713 | DRAFT_00381 | pfam02002      | TFIIE_alpha                                                      | 4.10E-17 |
| 2558669713 | DRAFT_00381 | TIGR00373      | transcription factor E                                           | 4.00E-37 |
| 2558669713 | DRAFT_00381 | KO:K03136      | transcription initiation factor TFIIE subunit alpha              | 0.00E+00 |
| 2558669713 | DRAFT_00381 | Locus_type     | CDS                                                              |          |
| 2558669713 | DRAFT_00381 | Product_name   | Transcription factor E (TFE)                                     |          |
| 2558669713 | DRAFT_00381 | Scaffold       | DRAFT_contig_70_37_len_56021_read_count_1021764.4                |          |
| 2558669713 | DRAFT_00381 | Coordinates    | 49990..50499(+)                                                  |          |
| 2558669713 | DRAFT_00381 | DNA_length     | 510bp                                                            |          |
| 2558669713 | DRAFT_00381 | Protein_length | 169aa                                                            |          |
| 2558669713 | DRAFT_00381 | GC             |                                                                  | 0.57     |
| 2558669714 | DRAFT_00382 | pfam01966      | HD                                                               | 7.40E-12 |
| 2558669714 | DRAFT_00382 | TIGR00277      | uncharacterized domain HDIG                                      | 1.10E-17 |
| 2558669714 | DRAFT_00382 | TIGR00295      | TIGR00295 family protein                                         | 4.40E-46 |
| 2558669714 | DRAFT_00382 | KO:K06950      | uncharacterized protein                                          | 6.20E-27 |
| 2558669714 | DRAFT_00382 | Locus_type     | CDS                                                              |          |
| 2558669714 | DRAFT_00382 | Product_name   | uncharacterized domain HDIG                                      |          |
| 2558669714 | DRAFT_00382 | Scaffold       | DRAFT_contig_70_37_len_56021_read_count_1021764.4                |          |
| 2558669714 | DRAFT_00382 | Coordinates    | 50496..51047(+)                                                  |          |
| 2558669714 | DRAFT_00382 | DNA_length     | 552bp                                                            |          |
| 2558669714 | DRAFT_00382 | Protein_length | 183aa                                                            |          |
| 2558669714 | DRAFT_00382 | GC             |                                                                  | 0.58     |
| 2558669715 | DRAFT_00383 | KEGG_module    | M00338: Cysteine biosynthesis, homocysteine + serine => cysteine |          |
| 2558669715 | DRAFT_00383 | Metacyc        | LCYSDEG-PWY: L-cysteine degradation II                           |          |
| 2558669715 | DRAFT_00383 | Metacyc        | PWY-801: homocysteine and cysteine interconversion               |          |
| 2558669715 | DRAFT_00383 | Metacyc        | HOMOCYSDEGR-PWY: cysteine biosynthesis/homocysteine degradation  |          |
| 2558669715 | DRAFT_00383 | COG_category   | [E] Amino acid transport and metabolism                          |          |

|            |             |                |                                                             |          |
|------------|-------------|----------------|-------------------------------------------------------------|----------|
| 2558669715 | DRAFT_00383 | COG0626        | Cystathionine beta-lyases/cystathionine gamma-synthases     | 0.00E+00 |
| 2558669715 | DRAFT_00383 | pfam01053      | Cys_Met_Meta_PP                                             | 0.00E+00 |
| 2558669715 | DRAFT_00383 | EC:4.4.1.1     | Cystathionine gamma-lyase.                                  |          |
| 2558669715 | DRAFT_00383 | KO:K01758      | cystathionine gamma-lyase [EC:4.4.1.1]                      | 0.00E+00 |
| 2558669715 | DRAFT_00383 | Locus_type     | CDS                                                         |          |
| 2558669715 | DRAFT_00383 | Product_name   | Cystathionine beta-lyases/cystathionine gamma-synthases     |          |
| 2558669715 | DRAFT_00383 | Scaffold       | DRAFT_contig_70_37_len_56021_read_count_1021764.4           |          |
| 2558669715 | DRAFT_00383 | Coordinates    | 51485..52735(+)                                             |          |
| 2558669715 | DRAFT_00383 | DNA_length     | 1251bp                                                      |          |
| 2558669715 | DRAFT_00383 | Protein_length | 416aa                                                       |          |
| 2558669715 | DRAFT_00383 | GC             |                                                             | 0.59     |
| 2558669716 | DRAFT_00384 | COG_category   | [R] General function prediction only                        |          |
| 2558669716 | DRAFT_00384 | COG1571        | Predicted DNA-binding protein containing a Zn-ribbon domain | 2.00E-71 |
| 2558669716 | DRAFT_00384 | pfam01336      | tRNA_anti-codon                                             | 5.00E-05 |
| 2558669716 | DRAFT_00384 | pfam08489      | DUF1743                                                     | 5.50E-33 |
| 2558669716 | DRAFT_00384 | Locus_type     | CDS                                                         |          |
| 2558669716 | DRAFT_00384 | Product_name   | Predicted DNA-binding protein containing a Zn-ribbon domain |          |
| 2558669716 | DRAFT_00384 | Scaffold       | DRAFT_contig_70_37_len_56021_read_count_1021764.4           |          |
| 2558669716 | DRAFT_00384 | Coordinates    | 52713..53918(-)                                             |          |
| 2558669716 | DRAFT_00384 | DNA_length     | 1206bp                                                      |          |
| 2558669716 | DRAFT_00384 | Protein_length | 401aa                                                       |          |
| 2558669716 | DRAFT_00384 | GC             |                                                             | 0.63     |
| 2558669717 | DRAFT_00385 | pfam01037      | AsnC_trans_reg                                              | 4.90E-12 |
| 2558669717 | DRAFT_00385 | Locus_type     | CDS                                                         |          |
| 2558669717 | DRAFT_00385 | Product_name   | transcriptional regulator, AsnC family                      |          |
| 2558669717 | DRAFT_00385 | Scaffold       | DRAFT_contig_70_37_len_56021_read_count_1021764.4           |          |
| 2558669717 | DRAFT_00385 | Coordinates    | 53965..54198(-)                                             |          |
| 2558669717 | DRAFT_00385 | DNA_length     | 234bp                                                       |          |
| 2558669717 | DRAFT_00385 | Protein_length | 77aa                                                        |          |
| 2558669717 | DRAFT_00385 | GC             |                                                             | 0.57     |
| 2558669718 | DRAFT_00386 | COG_category   | [S] Function unknown                                        |          |

|            |             |                |                                                                 |          |
|------------|-------------|----------------|-----------------------------------------------------------------|----------|
| 2558669718 | DRAFT_00386 | COG2042        | Uncharacterized conserved protein                               | 5.00E-46 |
| 2558669718 | DRAFT_00386 | pfam04034      | DUF367                                                          | 7.10E-41 |
| 2558669718 | DRAFT_00386 | KO:K09140      | pre-rRNA-processing protein TSR3                                | 1.80E-36 |
| 2558669718 | DRAFT_00386 | Locus_type     | CDS                                                             |          |
| 2558669718 | DRAFT_00386 | Product_name   | Uncharacterized conserved protein                               |          |
| 2558669718 | DRAFT_00386 | Scaffold       | DRAFT_contig_70_37_len_56021_read_count_1021764.4               |          |
| 2558669718 | DRAFT_00386 | Coordinates    | 54347..54856(+)                                                 |          |
| 2558669718 | DRAFT_00386 | DNA_length     | 510bp                                                           |          |
| 2558669718 | DRAFT_00386 | Protein_length | 169aa                                                           |          |
| 2558669718 | DRAFT_00386 | GC             |                                                                 | 0.6      |
| 2558669719 | DRAFT_00387 | Locus_type     | miscRNA                                                         |          |
| 2558669719 | DRAFT_00387 | Product_name   | Archaeal RNase P                                                |          |
| 2558669719 | DRAFT_00387 | Scaffold       | DRAFT_contig_70_37_len_56021_read_count_1021764.4               |          |
| 2558669719 | DRAFT_00387 | Coordinates    | 54899..55186(+)                                                 |          |
| 2558669719 | DRAFT_00387 | DNA_length     | 288bp                                                           |          |
| 2558669719 | DRAFT_00387 | GC             |                                                                 | 0.66     |
| 2558669720 | DRAFT_00388 | pfam00171      | Aldedh                                                          | 1.10E-83 |
| 2558669720 | DRAFT_00388 | Locus_type     | CDS                                                             |          |
| 2558669720 | DRAFT_00388 | Product_name   | NAD-dependent aldehyde dehydrogenases                           |          |
| 2558669720 | DRAFT_00388 | Scaffold       | DRAFT_contig_70_37_len_56021_read_count_1021764.4               |          |
| 2558669720 | DRAFT_00388 | Coordinates    | 55280..56020(-)                                                 |          |
| 2558669720 | DRAFT_00388 | DNA_length     | 741bp                                                           |          |
| 2558669720 | DRAFT_00388 | Protein_length | 246aa                                                           |          |
| 2558669720 | DRAFT_00388 | GC             |                                                                 | 0.55     |
| 2558669721 | DRAFT_00389 | COG_category   | [R] General function prediction only                            |          |
| 2558669721 | DRAFT_00389 | COG1310        | Predicted metal-dependent protease of the PAD1/JAB1 superfamily | 4.00E-06 |
| 2558669721 | DRAFT_00389 | pfam14464      | Prok-JAB                                                        | 3.20E-12 |
| 2558669721 | DRAFT_00389 | Locus_type     | CDS                                                             |          |
| 2558669721 | DRAFT_00389 | Product_name   | Predicted metal-dependent protease of the PAD1/JAB1 superfamily |          |
| 2558669721 | DRAFT_00389 | Scaffold       | DRAFT_contig_70_39_len_54107_read_count_943702.5                |          |
| 2558669721 | DRAFT_00389 | Coordinates    | 274..660(-)                                                     |          |

|            |             |                |                                                                  |          |
|------------|-------------|----------------|------------------------------------------------------------------|----------|
| 2558669721 | DRAFT_00389 | DNA_length     | 387bp                                                            |          |
| 2558669721 | DRAFT_00389 | Protein_length | 128aa                                                            |          |
| 2558669721 | DRAFT_00389 | GC             |                                                                  | 0.56     |
| 2558669722 | DRAFT_00390 | Locus_type     | CDS                                                              |          |
| 2558669722 | DRAFT_00390 | Product_name   | hypothetical protein                                             |          |
| 2558669722 | DRAFT_00390 | Scaffold       | DRAFT_contig_70_39_len_54107_read_count_943702.5                 |          |
| 2558669722 | DRAFT_00390 | Coordinates    | 670..825(-)                                                      |          |
| 2558669722 | DRAFT_00390 | DNA_length     | 156bp                                                            |          |
| 2558669722 | DRAFT_00390 | Protein_length | 51aa                                                             |          |
| 2558669722 | DRAFT_00390 | GC             |                                                                  | 0.55     |
| 2558669723 | DRAFT_00391 | KEGG_module    | M00343: Archaeal proteasome                                      |          |
| 2558669723 | DRAFT_00391 | KEGG_module    | M00342: Bacterial proteasome                                     |          |
| 2558669723 | DRAFT_00391 | COG_category   | [O] Posttranslational modification, protein turnover, chaperones |          |
| 2558669723 | DRAFT_00391 | COG0638        | 20S proteasome, alpha and beta subunits                          | 1.00E-50 |
| 2558669723 | DRAFT_00391 | pfam10584      | Proteasome_A_N                                                   | 3.40E-14 |
| 2558669723 | DRAFT_00391 | pfam00227      | Proteasome                                                       | 1.40E-54 |
| 2558669723 | DRAFT_00391 | EC:3.4.25.1    | Proteasome endopeptidase complex.                                |          |
| 2558669723 | DRAFT_00391 | TIGR03633      | proteasome endopeptidase complex, archaeal, alpha subunit        | 1.60E-91 |
| 2558669723 | DRAFT_00391 | KO:K03432      | proteasome alpha subunit [EC:3.4.25.1]                           | 0.00E+00 |
| 2558669723 | DRAFT_00391 | Locus_type     | CDS                                                              |          |
| 2558669723 | DRAFT_00391 | Product_name   | proteasome endopeptidase complex, archaeal, alpha subunit        |          |
| 2558669723 | DRAFT_00391 | Scaffold       | DRAFT_contig_70_39_len_54107_read_count_943702.5                 |          |
| 2558669723 | DRAFT_00391 | Coordinates    | 997..1746(+)                                                     |          |
| 2558669723 | DRAFT_00391 | DNA_length     | 750bp                                                            |          |
| 2558669723 | DRAFT_00391 | Protein_length | 249aa                                                            |          |
| 2558669723 | DRAFT_00391 | GC             |                                                                  | 0.57     |
| 2558669724 | DRAFT_00392 | COG_category   | [J] Translation, ribosomal structure and biogenesis              |          |
| 2558669724 | DRAFT_00392 | COG1500        | Predicted exosome subunit                                        | 5.00E-58 |
| 2558669724 | DRAFT_00392 | pfam09377      | SBDS_C                                                           | 2.80E-17 |
| 2558669724 | DRAFT_00392 | pfam01172      | SBDS                                                             | 3.00E-21 |
| 2558669724 | DRAFT_00392 | TIGR00291      | rRNA metabolism protein, SBDS family                             | 8.20E-68 |



|            |             |                |                                                                      |           |
|------------|-------------|----------------|----------------------------------------------------------------------|-----------|
| 2558669724 | DRAFT_00392 | KO:K14574      | ribosome maturation protein SDO1                                     | 0.00E+00  |
| 2558669724 | DRAFT_00392 | Locus_type     | CDS                                                                  |           |
| 2558669724 | DRAFT_00392 | Product_name   | rRNA metabolism protein, SBDS family                                 |           |
| 2558669724 | DRAFT_00392 | Scaffold       | DRAFT_contig_70_39_len_54107_read_count_943702.5                     |           |
| 2558669724 | DRAFT_00392 | Coordinates    | 1763..2503(+)                                                        |           |
| 2558669724 | DRAFT_00392 | DNA_length     | 741bp                                                                |           |
| 2558669724 | DRAFT_00392 | Protein_length | 246aa                                                                |           |
| 2558669724 | DRAFT_00392 | GC             |                                                                      | 0.58      |
| 2558669725 | DRAFT_00393 | KEGG_module    | M00391: Exosome, eukaryotes                                          |           |
| 2558669725 | DRAFT_00393 | KEGG_module    | M00390: Exosome, archaea                                             |           |
| 2558669725 | DRAFT_00393 | COG_category   | [J] Translation, ribosomal structure and biogenesis                  |           |
| 2558669725 | DRAFT_00393 | COG1097        | RNA-binding protein Rrp4 and related proteins (contain S1 domain and | 4.00E-46  |
| 2558669725 | DRAFT_00393 | pfam00575      | S1                                                                   | 1.10E-06  |
| 2558669725 | DRAFT_00393 | pfam00013      | KH_1                                                                 | 2.60E-12  |
| 2558669725 | DRAFT_00393 | KO:K03679      | exosome complex component RRP4                                       | 0.00E+00  |
| 2558669725 | DRAFT_00393 | Locus_type     | CDS                                                                  |           |
| 2558669725 | DRAFT_00393 | Product_name   | RNA-binding protein Rrp4 and related proteins (contain S1 domain an  |           |
| 2558669725 | DRAFT_00393 | Scaffold       | DRAFT_contig_70_39_len_54107_read_count_943702.5                     |           |
| 2558669725 | DRAFT_00393 | Coordinates    | 2514..3191(+)                                                        |           |
| 2558669725 | DRAFT_00393 | DNA_length     | 678bp                                                                |           |
| 2558669725 | DRAFT_00393 | Protein_length | 225aa                                                                |           |
| 2558669725 | DRAFT_00393 | GC             |                                                                      | 0.56      |
| 2558669726 | DRAFT_00394 | KEGG_module    | M00390: Exosome, archaea                                             |           |
| 2558669726 | DRAFT_00394 | KEGG_module    | M00391: Exosome, eukaryotes                                          |           |
| 2558669726 | DRAFT_00394 | COG_category   | [J] Translation, ribosomal structure and biogenesis                  |           |
| 2558669726 | DRAFT_00394 | COG0689        | RNase PH                                                             | 4.00E-68  |
| 2558669726 | DRAFT_00394 | pfam01138      | RNase_PH                                                             | 6.70E-34  |
| 2558669726 | DRAFT_00394 | pfam03725      | RNase_PH_C                                                           | 7.00E-13  |
| 2558669726 | DRAFT_00394 | TIGR02065      | archaeal exosome-like complex exonuclease 1                          | 3.70E-114 |
| 2558669726 | DRAFT_00394 | KO:K11600      | exosome complex component RRP41                                      | 0.00E+00  |
| 2558669726 | DRAFT_00394 | Locus_type     | CDS                                                                  |           |
| 2558669726 | DRAFT_00394 | Product_name   | ribosomal RNA-processing protein RRP41/SKI6 (EC 3.1.13.-)            |           |

|            |             |                |                                                      |          |
|------------|-------------|----------------|------------------------------------------------------|----------|
| 2558669726 | DRAFT_00394 | Scaffold       | DRAFT_contig_70_39_len_54107_read_count_943702.5     |          |
| 2558669726 | DRAFT_00394 | Coordinates    | 3166..3933(+)                                        |          |
| 2558669726 | DRAFT_00394 | DNA_length     | 768bp                                                |          |
| 2558669726 | DRAFT_00394 | Protein_length | 255aa                                                |          |
| 2558669726 | DRAFT_00394 | GC             |                                                      | 0.59     |
|            |             |                |                                                      |          |
| 2558669727 | DRAFT_00395 | KEGG_module    | M00390: Exosome, archaea                             |          |
| 2558669727 | DRAFT_00395 | KEGG_module    | M00391: Exosome, eukaryotes                          |          |
| 2558669727 | DRAFT_00395 | COG_category   | [J] Translation, ribosomal structure and biogenesis  |          |
| 2558669727 | DRAFT_00395 | COG2123        | RNase PH-related exoribonuclease                     | 4.00E-73 |
| 2558669727 | DRAFT_00395 | pfam01138      | RNase_PH                                             | 7.90E-25 |
| 2558669727 | DRAFT_00395 | pfam03725      | RNase_PH_C                                           | 2.20E-09 |
| 2558669727 | DRAFT_00395 | KO:K12589      | exosome complex component RRP42                      | 0.00E+00 |
| 2558669727 | DRAFT_00395 | ITERM:02704    | ribosomal RNA-processing protein RRP42 (EC 3.1.13.-) |          |
| 2558669727 | DRAFT_00395 | Locus_type     | CDS                                                  |          |
| 2558669727 | DRAFT_00395 | Product_name   | ribosomal RNA-processing protein RRP42 (EC 3.1.13.-) |          |
| 2558669727 | DRAFT_00395 | Scaffold       | DRAFT_contig_70_39_len_54107_read_count_943702.5     |          |
| 2558669727 | DRAFT_00395 | Coordinates    | 3944..4750(+)                                        |          |
| 2558669727 | DRAFT_00395 | DNA_length     | 807bp                                                |          |
| 2558669727 | DRAFT_00395 | Protein_length | 268aa                                                |          |
| 2558669727 | DRAFT_00395 | GC             |                                                      | 0.57     |
|            |             |                |                                                      |          |
| 2558669728 | DRAFT_00396 | KEGG_module    | M00177: Ribosome, eukaryotes                         |          |
| 2558669728 | DRAFT_00396 | KEGG_module    | M00179: Ribosome, archaea                            |          |
| 2558669728 | DRAFT_00396 | pfam01780      | Ribosomal_L37ae                                      | 2.50E-18 |
| 2558669728 | DRAFT_00396 | KO:K02921      | large subunit ribosomal protein L37Ae                | 1.10E-14 |
| 2558669728 | DRAFT_00396 | Locus_type     | CDS                                                  |          |
| 2558669728 | DRAFT_00396 | Product_name   | Ribosomal L37ae protein family                       |          |
| 2558669728 | DRAFT_00396 | Scaffold       | DRAFT_contig_70_39_len_54107_read_count_943702.5     |          |
| 2558669728 | DRAFT_00396 | Coordinates    | 4750..4974(+)                                        |          |
| 2558669728 | DRAFT_00396 | DNA_length     | 225bp                                                |          |
| 2558669728 | DRAFT_00396 | Protein_length | 74aa                                                 |          |
| 2558669728 | DRAFT_00396 | GC             |                                                      | 0.59     |

|            |             |                |                                                                  |          |
|------------|-------------|----------------|------------------------------------------------------------------|----------|
| 2558669729 | DRAFT_00397 | Locus_type     | CDS                                                              |          |
| 2558669729 | DRAFT_00397 | Product_name   | hypothetical protein                                             |          |
| 2558669729 | DRAFT_00397 | Scaffold       | DRAFT_contig_70_39_len_54107_read_count_943702.5                 |          |
| 2558669729 | DRAFT_00397 | Coordinates    | 4946..5185(+)                                                    |          |
| 2558669729 | DRAFT_00397 | DNA_length     | 240bp                                                            |          |
| 2558669729 | DRAFT_00397 | Protein_length | 79aa                                                             |          |
| 2558669729 | DRAFT_00397 | GC             |                                                                  | 0.55     |
|            |             |                |                                                                  |          |
| 2558669730 | DRAFT_00398 | COG_category   | [O] Posttranslational modification, protein turnover, chaperones |          |
| 2558669730 | DRAFT_00398 | COG1382        | Prefoldin, chaperonin cofactor                                   | 2.00E-13 |
| 2558669730 | DRAFT_00398 | pfam01920      | Prefoldin_2                                                      | 8.20E-15 |
| 2558669730 | DRAFT_00398 | TIGR02338      | prefoldin, beta subunit, archaeal                                | 1.20E-34 |
| 2558669730 | DRAFT_00398 | KO:K04798      | prefoldin beta subunit                                           | 8.80E-33 |
| 2558669730 | DRAFT_00398 | Locus_type     | CDS                                                              |          |
| 2558669730 | DRAFT_00398 | Product_name   | prefoldin, beta subunit, archaeal                                |          |
| 2558669730 | DRAFT_00398 | Scaffold       | DRAFT_contig_70_39_len_54107_read_count_943702.5                 |          |
| 2558669730 | DRAFT_00398 | Coordinates    | 5210..5590(+)                                                    |          |
| 2558669730 | DRAFT_00398 | DNA_length     | 381bp                                                            |          |
| 2558669730 | DRAFT_00398 | Protein_length | 126aa                                                            |          |
| 2558669730 | DRAFT_00398 | GC             |                                                                  | 0.56     |
|            |             |                |                                                                  |          |
| 2558669731 | DRAFT_00399 | COG_category   | [R] General function prediction only                             |          |
| 2558669731 | DRAFT_00399 | COG0618        | Exopolyphosphatase-related proteins                              | 1.00E-28 |
| 2558669731 | DRAFT_00399 | pfam01368      | DHH                                                              | 8.10E-12 |
| 2558669731 | DRAFT_00399 | pfam02272      | DHHA1                                                            | 2.00E-10 |
| 2558669731 | DRAFT_00399 | KO:K06881      | phosphoesterase RecJ domain-containing protein                   | 4.30E-34 |
| 2558669731 | DRAFT_00399 | Locus_type     | CDS                                                              |          |
| 2558669731 | DRAFT_00399 | Product_name   | Exopolyphosphatase-related proteins                              |          |
| 2558669731 | DRAFT_00399 | Scaffold       | DRAFT_contig_70_39_len_54107_read_count_943702.5                 |          |
| 2558669731 | DRAFT_00399 | Coordinates    | 5605..6612(+)                                                    |          |
| 2558669731 | DRAFT_00399 | DNA_length     | 1008bp                                                           |          |
| 2558669731 | DRAFT_00399 | Protein_length | 335aa                                                            |          |
| 2558669731 | DRAFT_00399 | GC             |                                                                  | 0.6      |

|            |             |                |                                                                                            |          |
|------------|-------------|----------------|--------------------------------------------------------------------------------------------|----------|
| 2558669732 | DRAFT_00400 | KEGG_module    | M00096: C5 isoprenoid biosynthesis, non-mevalonate pathway                                 |          |
| 2558669732 | DRAFT_00400 | KEGG_module    | M00365: C10-C20 isoprenoid biosynthesis, archaea                                           |          |
| 2558669732 | DRAFT_00400 | KEGG_module    | M00364: C10-C20 isoprenoid biosynthesis, bacteria                                          |          |
| 2558669732 | DRAFT_00400 | KEGG_module    | M00095: C5 isoprenoid biosynthesis, mevalonate pathway                                     |          |
| 2558669732 | DRAFT_00400 | KEGG_module    | M00366: C10-C20 isoprenoid biosynthesis, plants                                            |          |
| 2558669732 | DRAFT_00400 | KEGG_module    | M00367: C10-C20 isoprenoid biosynthesis, non-plant eukaryotes                              |          |
| 2558669732 | DRAFT_00400 | Metacyc        | PWY-6174: mevalonate pathway II (archaea)                                                  |          |
| 2558669732 | DRAFT_00400 | Metacyc        | PWY-6383: mono- <i>trans</i> , poly- <i>cis</i> decaprenyl phosphate biosynthesis          |          |
| 2558669732 | DRAFT_00400 | Metacyc        | PWY-5123: <i>trans</i> , <i>trans</i> -farnesyl diphosphate biosynthesis                   |          |
| 2558669732 | DRAFT_00400 | Metacyc        | PWY-7102: bisabolene biosynthesis                                                          |          |
| 2558669732 | DRAFT_00400 | Metacyc        | PWY-922: mevalonate pathway I                                                              |          |
| 2558669732 | DRAFT_00400 | Metacyc        | NONMEVIPP-PWY: methylerythritol phosphate pathway                                          |          |
| 2558669732 | DRAFT_00400 | Metacyc        | PWY-6859: <i>all-trans</i> -farnesol biosynthesis                                          |          |
| 2558669732 | DRAFT_00400 | IMG_pathway    | 365: dimethylallyl pyrophosphate biosynthesis via isomerization of isopentenyl diphosphate |          |
| 2558669732 | DRAFT_00400 | COG_category   | [I] Lipid transport and metabolism                                                         |          |
| 2558669732 | DRAFT_00400 | COG1443        | Isopentenyl diphosphate isomerase                                                          | 7.00E-30 |
| 2558669732 | DRAFT_00400 | pfam00293      | NUDIX                                                                                      | 2.30E-12 |
| 2558669732 | DRAFT_00400 | EC:5.3.3.2     | Isopentenyl-diphosphate Delta-isomerase.                                                   |          |
| 2558669732 | DRAFT_00400 | TIGR02150      | isopentenyl-diphosphate delta-isomerase, type 1                                            | 1.80E-35 |
| 2558669732 | DRAFT_00400 | KO:K01823      | isopentenyl-diphosphate delta-isomerase [EC:5.3.3.2]                                       | 6.50E-29 |
| 2558669732 | DRAFT_00400 | ITERM:00469    | isopentenyl-diphosphate delta-isomerase (EC 5.3.3.2)                                       |          |
| 2558669732 | DRAFT_00400 | Locus_type     | CDS                                                                                        |          |
| 2558669732 | DRAFT_00400 | Product_name   | isopentenyl-diphosphate delta-isomerase (EC 5.3.3.2)                                       |          |
| 2558669732 | DRAFT_00400 | Scaffold       | DRAFT_contig_70_39_len_54107_read_count_943702.5                                           |          |
| 2558669732 | DRAFT_00400 | Coordinates    | 6622..7164(-)                                                                              |          |
| 2558669732 | DRAFT_00400 | DNA_length     | 543bp                                                                                      |          |
| 2558669732 | DRAFT_00400 | Protein_length | 180aa                                                                                      |          |
| 2558669732 | DRAFT_00400 | GC             |                                                                                            | 0.58     |
| 2558669733 | DRAFT_00401 | Metacyc        | PWY-6167: flavin biosynthesis II (archaea)                                                 |          |
| 2558669733 | DRAFT_00401 | COG_category   | [K] Transcription                                                                          |          |
| 2558669733 | DRAFT_00401 | COG_category   | [H] Coenzyme transport and metabolism                                                      |          |
| 2558669733 | DRAFT_00401 | COG1339        | Transcriptional regulator of a riboflavin/FAD biosynthetic operon                          | 3.00E-44 |
| 2558669733 | DRAFT_00401 | pfam12802      | MarR_2                                                                                     | 1.60E-10 |

|            |             |                |                                                                                              |          |
|------------|-------------|----------------|----------------------------------------------------------------------------------------------|----------|
| 2558669733 | DRAFT_00401 | pfam01982      | CTP-dep_RFKase                                                                               | 3.90E-39 |
| 2558669733 | DRAFT_00401 | EC:2.7.1.161   | CTP-dependent riboflavin kinase.                                                             |          |
| 2558669733 | DRAFT_00401 | KO:K07732      | riboflavin kinase, archaea type [EC:2.7.1.161]                                               | 0.00E+00 |
| 2558669733 | DRAFT_00401 | Locus_type     | CDS                                                                                          |          |
| 2558669733 | DRAFT_00401 | Product_name   | Transcriptional regulator of a riboflavin/FAD biosynthetic operon                            |          |
| 2558669733 | DRAFT_00401 | Scaffold       | DRAFT_contig_70_39_len_54107_read_count_943702.5                                             |          |
| 2558669733 | DRAFT_00401 | Coordinates    | 7206..7901(-)                                                                                |          |
| 2558669733 | DRAFT_00401 | DNA_length     | 696bp                                                                                        |          |
| 2558669733 | DRAFT_00401 | Protein_length | 231aa                                                                                        |          |
| 2558669733 | DRAFT_00401 | GC             |                                                                                              | 0.56     |
| 2558669734 | DRAFT_00402 | Locus_type     | CDS                                                                                          |          |
| 2558669734 | DRAFT_00402 | Product_name   | Predicted membrane protein                                                                   |          |
| 2558669734 | DRAFT_00402 | Scaffold       | DRAFT_contig_70_39_len_54107_read_count_943702.5                                             |          |
| 2558669734 | DRAFT_00402 | Coordinates    | 7963..8544(+)                                                                                |          |
| 2558669734 | DRAFT_00402 | DNA_length     | 582bp                                                                                        |          |
| 2558669734 | DRAFT_00402 | Protein_length | 193aa                                                                                        |          |
| 2558669734 | DRAFT_00402 | GC             |                                                                                              | 0.55     |
| 2558669734 | DRAFT_00402 | Transmembrane  | Yes                                                                                          |          |
| 2558669735 | DRAFT_00403 | Metacyc        | PWYG-321: mycolate biosynthesis                                                              |          |
| 2558669735 | DRAFT_00403 | Metacyc        | PWY-6972: oleandomycin activation/inactivation                                               |          |
| 2558669735 | DRAFT_00403 | COG_category   | [P] Inorganic ion transport and metabolism                                                   |          |
| 2558669735 | DRAFT_00403 | COG1122        | ABC-type cobalt transport system, ATPase component                                           | 2.00E-63 |
| 2558669735 | DRAFT_00403 | pfam00005      | ABC_tran                                                                                     | 3.20E-28 |
| 2558669735 | DRAFT_00403 | EC:3.6.3.-     | Hydrolases. Acting on acid anhydrides. Acting on acid anhydrides; catalyzing transmembrane n |          |
| 2558669735 | DRAFT_00403 | KO:K16786      | energy-coupling factor transport system ATP-binding protein [EC:3.6.3.                       | 0.00E+00 |
| 2558669735 | DRAFT_00403 | Locus_type     | CDS                                                                                          |          |
| 2558669735 | DRAFT_00403 | Product_name   | ABC-type cobalt transport system, ATPase component                                           |          |
| 2558669735 | DRAFT_00403 | Scaffold       | DRAFT_contig_70_39_len_54107_read_count_943702.5                                             |          |
| 2558669735 | DRAFT_00403 | Coordinates    | 8600..9445(+)                                                                                |          |
| 2558669735 | DRAFT_00403 | DNA_length     | 846bp                                                                                        |          |
| 2558669735 | DRAFT_00403 | Protein_length | 281aa                                                                                        |          |
| 2558669735 | DRAFT_00403 | GC             |                                                                                              | 0.59     |

|            |             |                |                                                                                              |          |
|------------|-------------|----------------|----------------------------------------------------------------------------------------------|----------|
| 2558669736 | DRAFT_00404 | Metacyc        | PWY-6972: oleandomycin activation/inactivation                                               |          |
| 2558669736 | DRAFT_00404 | Metacyc        | PWYG-321: mycolate biosynthesis                                                              |          |
| 2558669736 | DRAFT_00404 | COG_category   | [P] Inorganic ion transport and metabolism                                                   |          |
| 2558669736 | DRAFT_00404 | COG1122        | ABC-type cobalt transport system, ATPase component                                           | 9.00E-60 |
| 2558669736 | DRAFT_00404 | pfam00005      | ABC_tran                                                                                     | 6.20E-29 |
| 2558669736 | DRAFT_00404 | EC:3.6.3.-     | Hydrolases. Acting on acid anhydrides. Acting on acid anhydrides; catalyzing transmembrane n |          |
| 2558669736 | DRAFT_00404 | KO:K16787      | energy-coupling factor transport system ATP-binding protein [EC:3.6.3. 0.00E+00              |          |
| 2558669736 | DRAFT_00404 | Locus_type     | CDS                                                                                          |          |
| 2558669736 | DRAFT_00404 | Product_name   | ABC-type cobalt transport system, ATPase component                                           |          |
| 2558669736 | DRAFT_00404 | Scaffold       | DRAFT_contig_70_39_len_54107_read_count_943702.5                                             |          |
| 2558669736 | DRAFT_00404 | Coordinates    | 9442..10251(+)                                                                               |          |
| 2558669736 | DRAFT_00404 | DNA_length     | 810bp                                                                                        |          |
| 2558669736 | DRAFT_00404 | Protein_length | 269aa                                                                                        |          |
| 2558669736 | DRAFT_00404 | GC             |                                                                                              | 0.61     |
| 2558669737 | DRAFT_00405 | KEGG_module    | M00245: Cobalt transport system                                                              |          |
| 2558669737 | DRAFT_00405 | KEGG_module    | M00246: Nickel transport system                                                              |          |
| 2558669737 | DRAFT_00405 | COG_category   | [P] Inorganic ion transport and metabolism                                                   |          |
| 2558669737 | DRAFT_00405 | COG0619        | ABC-type cobalt transport system, permease component CbiQ and rela                           | 2.00E-18 |
| 2558669737 | DRAFT_00405 | pfam02361      | CbiQ                                                                                         | 2.30E-29 |
| 2558669737 | DRAFT_00405 | KO:K02008      | cobalt/nickel transport system permease protein                                              | 1.60E-30 |
| 2558669737 | DRAFT_00405 | Locus_type     | CDS                                                                                          |          |
| 2558669737 | DRAFT_00405 | Product_name   | ABC-type cobalt transport system, permease component CbiQ and re                             |          |
| 2558669737 | DRAFT_00405 | Scaffold       | DRAFT_contig_70_39_len_54107_read_count_943702.5                                             |          |
| 2558669737 | DRAFT_00405 | Coordinates    | 10253..10999(+)                                                                              |          |
| 2558669737 | DRAFT_00405 | DNA_length     | 747bp                                                                                        |          |
| 2558669737 | DRAFT_00405 | Protein_length | 248aa                                                                                        |          |
| 2558669737 | DRAFT_00405 | GC             |                                                                                              | 0.58     |
| 2558669737 | DRAFT_00405 | Transmembrane  | Yes                                                                                          |          |
| 2558669738 | DRAFT_00406 | Metacyc        | PWY-1921: indole-3-acetate activation II                                                     |          |
| 2558669738 | DRAFT_00406 | COG_category   | [L] Replication, recombination and repair                                                    |          |
| 2558669738 | DRAFT_00406 | COG1948        | ERCC4-type nuclease                                                                          | 7.00E-44 |

|            |             |                |                                                                            |           |
|------------|-------------|----------------|----------------------------------------------------------------------------|-----------|
| 2558669738 | DRAFT_00406 | pfam02732      | ERCC4                                                                      | 7.60E-24  |
| 2558669738 | DRAFT_00406 | EC:3.1.-       | Hydrolases. Acting on ester bonds.                                         |           |
| 2558669738 | DRAFT_00406 | KO:K10848      | DNA excision repair protein ERCC-4 [EC:3.1.-.]                             | 5.10E-39  |
| 2558669738 | DRAFT_00406 | Locus_type     | CDS                                                                        |           |
| 2558669738 | DRAFT_00406 | Product_name   | ERCC4-type nuclease                                                        |           |
| 2558669738 | DRAFT_00406 | Scaffold       | DRAFT_contig_70_39_len_54107_read_count_943702.5                           |           |
| 2558669738 | DRAFT_00406 | Coordinates    | 10996..11682(+)                                                            |           |
| 2558669738 | DRAFT_00406 | DNA_length     | 687bp                                                                      |           |
| 2558669738 | DRAFT_00406 | Protein_length | 228aa                                                                      |           |
| 2558669738 | DRAFT_00406 | GC             |                                                                            | 0.6       |
|            |             |                |                                                                            |           |
| 2558669739 | DRAFT_00407 | COG_category   | [R] General function prediction only                                       |           |
| 2558669739 | DRAFT_00407 | COG2085        | Predicted dinucleotide-binding enzymes                                     | 1.00E-31  |
| 2558669739 | DRAFT_00407 | pfam03807      | F420_oxidored                                                              | 2.90E-19  |
| 2558669739 | DRAFT_00407 | TIGR01915      | NADPH-dependent F420 reductase                                             | 1.60E-48  |
| 2558669739 | DRAFT_00407 | Locus_type     | CDS                                                                        |           |
| 2558669739 | DRAFT_00407 | Product_name   | NADPH-dependent F420 reductase                                             |           |
| 2558669739 | DRAFT_00407 | Scaffold       | DRAFT_contig_70_39_len_54107_read_count_943702.5                           |           |
| 2558669739 | DRAFT_00407 | Coordinates    | 11679..12305(+)                                                            |           |
| 2558669739 | DRAFT_00407 | DNA_length     | 627bp                                                                      |           |
| 2558669739 | DRAFT_00407 | Protein_length | 208aa                                                                      |           |
| 2558669739 | DRAFT_00407 | GC             |                                                                            | 0.6       |
|            |             |                |                                                                            |           |
| 2558669740 | DRAFT_00408 | COG_category   | [E] Amino acid transport and metabolism                                    |           |
| 2558669740 | DRAFT_00408 | COG0308        | Aminopeptidase N                                                           | 1.00E-126 |
| 2558669740 | DRAFT_00408 | pfam11838      | ERAP1_C                                                                    | 8.70E-30  |
| 2558669740 | DRAFT_00408 | pfam01433      | Peptidase_M1                                                               | 4.90E-103 |
| 2558669740 | DRAFT_00408 | EC:3.4.11.-    | Hydrolases. Acting on peptide bonds (peptide hydrolases). Aminopeptidases. |           |
| 2558669740 | DRAFT_00408 | KO:K13722      | tricorn protease interacting factor F2/3 [EC:3.4.11.-]                     | 0.00E+00  |
| 2558669740 | DRAFT_00408 | Locus_type     | CDS                                                                        |           |
| 2558669740 | DRAFT_00408 | Product_name   | Aminopeptidase N                                                           |           |
| 2558669740 | DRAFT_00408 | Scaffold       | DRAFT_contig_70_39_len_54107_read_count_943702.5                           |           |
| 2558669740 | DRAFT_00408 | Coordinates    | 12372..14777(-)                                                            |           |
| 2558669740 | DRAFT_00408 | DNA_length     | 2406bp                                                                     |           |

|            |             |                |                                                     |          |
|------------|-------------|----------------|-----------------------------------------------------|----------|
| 2558669740 | DRAFT_00408 | Protein_length | 801aa                                               |          |
| 2558669740 | DRAFT_00408 | GC             |                                                     | 0.6      |
| 2558669741 | DRAFT_00409 | Locus_type     | CDS                                                 |          |
| 2558669741 | DRAFT_00409 | Product_name   | hypothetical protein                                |          |
| 2558669741 | DRAFT_00409 | Scaffold       | DRAFT_contig_70_39_len_54107_read_count_943702.5    |          |
| 2558669741 | DRAFT_00409 | Coordinates    | 14922..15377(-)                                     |          |
| 2558669741 | DRAFT_00409 | DNA_length     | 456bp                                               |          |
| 2558669741 | DRAFT_00409 | Protein_length | 151aa                                               |          |
| 2558669741 | DRAFT_00409 | GC             |                                                     | 0.52     |
| 2558669742 | DRAFT_00410 | Locus_type     | CDS                                                 |          |
| 2558669742 | DRAFT_00410 | Product_name   | hypothetical protein                                |          |
| 2558669742 | DRAFT_00410 | Scaffold       | DRAFT_contig_70_39_len_54107_read_count_943702.5    |          |
| 2558669742 | DRAFT_00410 | Coordinates    | 16110..16511(-)                                     |          |
| 2558669742 | DRAFT_00410 | DNA_length     | 402bp                                               |          |
| 2558669742 | DRAFT_00410 | Protein_length | 133aa                                               |          |
| 2558669742 | DRAFT_00410 | GC             |                                                     | 0.57     |
| 2558669742 | DRAFT_00410 | Signal_peptide | Yes                                                 |          |
| 2558669742 | DRAFT_00410 | Transmembrane  | Yes                                                 |          |
| 2558669743 | DRAFT_00411 | COG_category   | [J] Translation, ribosomal structure and biogenesis |          |
| 2558669743 | DRAFT_00411 | COG0480        | Translation elongation factors (GTPases)            | 0.00E+00 |
| 2558669743 | DRAFT_00411 | pfam03764      | EFG_IV                                              | 2.80E-21 |
| 2558669743 | DRAFT_00411 | pfam00679      | EFG_C                                               | 2.30E-18 |
| 2558669743 | DRAFT_00411 | pfam00009      | GTP_EFTU                                            | 1.40E-56 |
| 2558669743 | DRAFT_00411 | pfam03144      | GTP_EFTU_D2                                         | 9.40E-11 |
| 2558669743 | DRAFT_00411 | pfam14492      | EFG_II                                              | 2.90E-18 |
| 2558669743 | DRAFT_00411 | TIGR00231      | small GTP-binding protein domain                    | 2.20E-22 |
| 2558669743 | DRAFT_00411 | TIGR00490      | translation elongation factor aEF-2                 | 0.00E+00 |
| 2558669743 | DRAFT_00411 | KO:K03234      | elongation factor 2                                 | 0.00E+00 |
| 2558669743 | DRAFT_00411 | Locus_type     | CDS                                                 |          |
| 2558669743 | DRAFT_00411 | Product_name   | translation elongation factor aEF-2                 |          |
| 2558669743 | DRAFT_00411 | Scaffold       | DRAFT_contig_70_39_len_54107_read_count_943702.5    |          |



|            |             |                |                                                                            |                                                                         |          |
|------------|-------------|----------------|----------------------------------------------------------------------------|-------------------------------------------------------------------------|----------|
| 2558669743 | DRAFT_00411 | Coordinates    |                                                                            | 16679..18871(-)                                                         |          |
| 2558669743 | DRAFT_00411 | DNA_length     |                                                                            | 2193bp                                                                  |          |
| 2558669743 | DRAFT_00411 | Protein_length |                                                                            | 730aa                                                                   |          |
| 2558669743 | DRAFT_00411 | GC             |                                                                            |                                                                         | 0.58     |
| 2558669744 | DRAFT_00412 | pfam09594      | DUF2029                                                                    |                                                                         | 1.40E-06 |
| 2558669744 | DRAFT_00412 | Locus_type     |                                                                            | CDS                                                                     |          |
| 2558669744 | DRAFT_00412 | Product_name   |                                                                            | Protein of unknown function (DUF2029)                                   |          |
| 2558669744 | DRAFT_00412 | Scaffold       |                                                                            | DRAFT_contig_70_39_len_54107_read_count_943702.5                        |          |
| 2558669744 | DRAFT_00412 | Coordinates    |                                                                            | 18926..19882(-)                                                         |          |
| 2558669744 | DRAFT_00412 | DNA_length     |                                                                            | 957bp                                                                   |          |
| 2558669744 | DRAFT_00412 | Protein_length |                                                                            | 318aa                                                                   |          |
| 2558669744 | DRAFT_00412 | GC             |                                                                            |                                                                         | 0.57     |
| 2558669744 | DRAFT_00412 | Transmembrane  |                                                                            | Yes                                                                     |          |
| 2558669745 | DRAFT_00413 | Locus_type     |                                                                            | CDS                                                                     |          |
| 2558669745 | DRAFT_00413 | Product_name   |                                                                            | hypothetical protein                                                    |          |
| 2558669745 | DRAFT_00413 | Scaffold       |                                                                            | DRAFT_contig_70_39_len_54107_read_count_943702.5                        |          |
| 2558669745 | DRAFT_00413 | Coordinates    |                                                                            | 20030..20251(+)                                                         |          |
| 2558669745 | DRAFT_00413 | DNA_length     |                                                                            | 222bp                                                                   |          |
| 2558669745 | DRAFT_00413 | Protein_length |                                                                            | 73aa                                                                    |          |
| 2558669745 | DRAFT_00413 | GC             |                                                                            |                                                                         | 0.56     |
| 2558669745 | DRAFT_00413 | Transmembrane  |                                                                            | Yes                                                                     |          |
| 2558669746 | DRAFT_00414 | COG_category   | [O] Posttranslational modification, protein turnover, chaperones           |                                                                         |          |
| 2558669746 | DRAFT_00414 | COG0265        | Trypsin-like serine proteases, typically periplasmic, contain C-terminal I |                                                                         | 1.00E-52 |
| 2558669746 | DRAFT_00414 | pfam13180      | PDZ_2                                                                      |                                                                         | 1.20E-10 |
| 2558669746 | DRAFT_00414 | pfam13365      | Trypsin_2                                                                  |                                                                         | 2.90E-20 |
| 2558669746 | DRAFT_00414 | Locus_type     |                                                                            | CDS                                                                     |          |
| 2558669746 | DRAFT_00414 | Product_name   |                                                                            | Trypsin-like serine proteases, typically periplasmic, contain C-termina |          |
| 2558669746 | DRAFT_00414 | Scaffold       |                                                                            | DRAFT_contig_70_39_len_54107_read_count_943702.5                        |          |
| 2558669746 | DRAFT_00414 | Coordinates    |                                                                            | 20426..21400(-)                                                         |          |
| 2558669746 | DRAFT_00414 | DNA_length     |                                                                            | 975bp                                                                   |          |
| 2558669746 | DRAFT_00414 | Protein_length |                                                                            | 324aa                                                                   |          |

|            |             |                |                                                  |          |
|------------|-------------|----------------|--------------------------------------------------|----------|
| 2558669746 | DRAFT_00414 | GC             |                                                  | 0.62     |
| 2558669747 | DRAFT_00415 | COG_category   | [K] Transcription                                |          |
| 2558669747 | DRAFT_00415 | COG1733        | Predicted transcriptional regulators             | 1.00E-18 |
| 2558669747 | DRAFT_00415 | pfam01638      | HxIR                                             | 3.60E-23 |
| 2558669747 | DRAFT_00415 | ITERM:02284    | transcriptional regulator, HxIR family           |          |
| 2558669747 | DRAFT_00415 | Locus_type     | CDS                                              |          |
| 2558669747 | DRAFT_00415 | Product_name   | transcriptional regulator, HxIR family           |          |
| 2558669747 | DRAFT_00415 | Scaffold       | DRAFT_contig_70_39_len_54107_read_count_943702.5 |          |
| 2558669747 | DRAFT_00415 | Coordinates    | 21599..21973(+)                                  |          |
| 2558669747 | DRAFT_00415 | DNA_length     | 375bp                                            |          |
| 2558669747 | DRAFT_00415 | Protein_length | 124aa                                            |          |
| 2558669747 | DRAFT_00415 | GC             |                                                  | 0.57     |
| 2558669748 | DRAFT_00416 | Locus_type     | CDS                                              |          |
| 2558669748 | DRAFT_00416 | Product_name   | hypothetical protein                             |          |
| 2558669748 | DRAFT_00416 | Scaffold       | DRAFT_contig_70_39_len_54107_read_count_943702.5 |          |
| 2558669748 | DRAFT_00416 | Coordinates    | 21980..22378(-)                                  |          |
| 2558669748 | DRAFT_00416 | DNA_length     | 399bp                                            |          |
| 2558669748 | DRAFT_00416 | Protein_length | 132aa                                            |          |
| 2558669748 | DRAFT_00416 | GC             |                                                  | 0.55     |
| 2558669748 | DRAFT_00416 | Transmembrane  | Yes                                              |          |
| 2558669749 | DRAFT_00417 | Locus_type     | CDS                                              |          |
| 2558669749 | DRAFT_00417 | Product_name   | hypothetical protein                             |          |
| 2558669749 | DRAFT_00417 | Scaffold       | DRAFT_contig_70_39_len_54107_read_count_943702.5 |          |
| 2558669749 | DRAFT_00417 | Coordinates    | 22419..22853(-)                                  |          |
| 2558669749 | DRAFT_00417 | DNA_length     | 435bp                                            |          |
| 2558669749 | DRAFT_00417 | Protein_length | 144aa                                            |          |
| 2558669749 | DRAFT_00417 | GC             |                                                  | 0.58     |
| 2558669749 | DRAFT_00417 | Transmembrane  | Yes                                              |          |
| 2558669750 | DRAFT_00418 | Locus_type     | CDS                                              |          |
| 2558669750 | DRAFT_00418 | Product_name   | hypothetical protein                             |          |

|            |             |                |                                      |                                                  |          |
|------------|-------------|----------------|--------------------------------------|--------------------------------------------------|----------|
| 2558669750 | DRAFT_00418 | Scaffold       |                                      | DRAFT_contig_70_39_len_54107_read_count_943702.5 |          |
| 2558669750 | DRAFT_00418 | Coordinates    |                                      | 22910..23077(+)                                  |          |
| 2558669750 | DRAFT_00418 | DNA_length     |                                      | 168bp                                            |          |
| 2558669750 | DRAFT_00418 | Protein_length |                                      | 55aa                                             |          |
| 2558669750 | DRAFT_00418 | GC             |                                      |                                                  | 0.55     |
| 2558669750 | DRAFT_00418 | Transmembrane  |                                      | Yes                                              |          |
| 2558669751 | DRAFT_00419 | COG_category   | [R] General function prediction only |                                                  |          |
| 2558669751 | DRAFT_00419 | COG1832        | Predicted CoA-binding protein        |                                                  | 3.00E-32 |
| 2558669751 | DRAFT_00419 | pfam13380      | CoA_binding_2                        |                                                  | 3.60E-29 |
| 2558669751 | DRAFT_00419 | Locus_type     |                                      | CDS                                              |          |
| 2558669751 | DRAFT_00419 | Product_name   |                                      | Predicted CoA-binding protein                    |          |
| 2558669751 | DRAFT_00419 | Scaffold       |                                      | DRAFT_contig_70_39_len_54107_read_count_943702.5 |          |
| 2558669751 | DRAFT_00419 | Coordinates    |                                      | 23305..23712(+)                                  |          |
| 2558669751 | DRAFT_00419 | DNA_length     |                                      | 408bp                                            |          |
| 2558669751 | DRAFT_00419 | Protein_length |                                      | 135aa                                            |          |
| 2558669751 | DRAFT_00419 | GC             |                                      |                                                  | 0.56     |
| 2558669752 | DRAFT_00420 | Locus_type     |                                      | CDS                                              |          |
| 2558669752 | DRAFT_00420 | Product_name   |                                      | hypothetical protein                             |          |
| 2558669752 | DRAFT_00420 | Scaffold       |                                      | DRAFT_contig_70_39_len_54107_read_count_943702.5 |          |
| 2558669752 | DRAFT_00420 | Coordinates    |                                      | 23712..23903(+)                                  |          |
| 2558669752 | DRAFT_00420 | DNA_length     |                                      | 192bp                                            |          |
| 2558669752 | DRAFT_00420 | Protein_length |                                      | 63aa                                             |          |
| 2558669752 | DRAFT_00420 | GC             |                                      |                                                  | 0.59     |
| 2558669753 | DRAFT_00421 | pfam14907      | NTP_transf_5                         |                                                  | 8.60E-07 |
| 2558669753 | DRAFT_00421 | Locus_type     |                                      | CDS                                              |          |
| 2558669753 | DRAFT_00421 | Product_name   |                                      | Uncharacterised nucleotidyltransferase           |          |
| 2558669753 | DRAFT_00421 | Scaffold       |                                      | DRAFT_contig_70_39_len_54107_read_count_943702.5 |          |
| 2558669753 | DRAFT_00421 | Coordinates    |                                      | 24092..24853(+)                                  |          |
| 2558669753 | DRAFT_00421 | DNA_length     |                                      | 762bp                                            |          |
| 2558669753 | DRAFT_00421 | Protein_length |                                      | 253aa                                            |          |
| 2558669753 | DRAFT_00421 | GC             |                                      |                                                  | 0.54     |

|            |             |                |       |                                                  |          |
|------------|-------------|----------------|-------|--------------------------------------------------|----------|
| 2558669754 | DRAFT_00422 | Locus_type     |       | CDS                                              |          |
| 2558669754 | DRAFT_00422 | Product_name   |       | hypothetical protein                             |          |
| 2558669754 | DRAFT_00422 | Scaffold       |       | DRAFT_contig_70_39_len_54107_read_count_943702.5 |          |
| 2558669754 | DRAFT_00422 | Coordinates    |       | 24850..25215(-)                                  |          |
| 2558669754 | DRAFT_00422 | DNA_length     |       | 366bp                                            |          |
| 2558669754 | DRAFT_00422 | Protein_length |       | 121aa                                            |          |
| 2558669754 | DRAFT_00422 | GC             |       |                                                  | 0.57     |
|            |             |                |       |                                                  |          |
| 2558669755 | DRAFT_00423 | Locus_type     |       | CDS                                              |          |
| 2558669755 | DRAFT_00423 | Product_name   |       | hypothetical protein                             |          |
| 2558669755 | DRAFT_00423 | Scaffold       |       | DRAFT_contig_70_39_len_54107_read_count_943702.5 |          |
| 2558669755 | DRAFT_00423 | Coordinates    |       | 25190..25480(-)                                  |          |
| 2558669755 | DRAFT_00423 | DNA_length     |       | 291bp                                            |          |
| 2558669755 | DRAFT_00423 | Protein_length |       | 96aa                                             |          |
| 2558669755 | DRAFT_00423 | GC             |       |                                                  | 0.53     |
|            |             |                |       |                                                  |          |
| 2558669756 | DRAFT_00424 | Locus_type     |       | CDS                                              |          |
| 2558669756 | DRAFT_00424 | Product_name   |       | hypothetical protein                             |          |
| 2558669756 | DRAFT_00424 | Scaffold       |       | DRAFT_contig_70_39_len_54107_read_count_943702.5 |          |
| 2558669756 | DRAFT_00424 | Coordinates    |       | 25572..25946(-)                                  |          |
| 2558669756 | DRAFT_00424 | DNA_length     |       | 375bp                                            |          |
| 2558669756 | DRAFT_00424 | Protein_length |       | 124aa                                            |          |
| 2558669756 | DRAFT_00424 | GC             |       |                                                  | 0.56     |
|            |             |                |       |                                                  |          |
| 2558669757 | DRAFT_00425 | pfam13683      | rve_3 |                                                  | 7.00E-07 |
| 2558669757 | DRAFT_00425 | Locus_type     |       | CDS                                              |          |
| 2558669757 | DRAFT_00425 | Product_name   |       | Integrase core domain                            |          |
| 2558669757 | DRAFT_00425 | Scaffold       |       | DRAFT_contig_70_39_len_54107_read_count_943702.5 |          |
| 2558669757 | DRAFT_00425 | Coordinates    |       | 25960..26259(+)                                  |          |
| 2558669757 | DRAFT_00425 | DNA_length     |       | 300bp                                            |          |
| 2558669757 | DRAFT_00425 | Protein_length |       | 99aa                                             |          |
| 2558669757 | DRAFT_00425 | GC             |       |                                                  | 0.53     |

|            |             |                |                                                  |          |
|------------|-------------|----------------|--------------------------------------------------|----------|
| 2558669758 | DRAFT_00426 | Locus_type     | CDS                                              |          |
| 2558669758 | DRAFT_00426 | Product_name   | hypothetical protein                             |          |
| 2558669758 | DRAFT_00426 | Scaffold       | DRAFT_contig_70_39_len_54107_read_count_943702.5 |          |
| 2558669758 | DRAFT_00426 | Coordinates    | 26715..27236(-)                                  |          |
| 2558669758 | DRAFT_00426 | DNA_length     | 522bp                                            |          |
| 2558669758 | DRAFT_00426 | Protein_length | 173aa                                            |          |
| 2558669758 | DRAFT_00426 | GC             |                                                  | 0.41     |
|            |             |                |                                                  |          |
| 2558669759 | DRAFT_00427 | Locus_type     | CDS                                              |          |
| 2558669759 | DRAFT_00427 | Product_name   | hypothetical protein                             |          |
| 2558669759 | DRAFT_00427 | Scaffold       | DRAFT_contig_70_39_len_54107_read_count_943702.5 |          |
| 2558669759 | DRAFT_00427 | Coordinates    | 27646..28116(-)                                  |          |
| 2558669759 | DRAFT_00427 | DNA_length     | 471bp                                            |          |
| 2558669759 | DRAFT_00427 | Protein_length | 156aa                                            |          |
| 2558669759 | DRAFT_00427 | GC             |                                                  | 0.48     |
|            |             |                |                                                  |          |
| 2558669760 | DRAFT_00428 | Locus_type     | CDS                                              |          |
| 2558669760 | DRAFT_00428 | Product_name   | hypothetical protein                             |          |
| 2558669760 | DRAFT_00428 | Scaffold       | DRAFT_contig_70_39_len_54107_read_count_943702.5 |          |
| 2558669760 | DRAFT_00428 | Coordinates    | 28100..28285(-)                                  |          |
| 2558669760 | DRAFT_00428 | DNA_length     | 186bp                                            |          |
| 2558669760 | DRAFT_00428 | Protein_length | 61aa                                             |          |
| 2558669760 | DRAFT_00428 | GC             |                                                  | 0.48     |
|            |             |                |                                                  |          |
| 2558669761 | DRAFT_00429 | COG_category   | [L] Replication, recombination and repair        |          |
| 2558669761 | DRAFT_00429 | COG3316        | Transposase and inactivated derivatives          | 2.00E-11 |
| 2558669761 | DRAFT_00429 | pfam13610      | DDE_Tnp_IS240                                    | 1.90E-19 |
| 2558669761 | DRAFT_00429 | Locus_type     | CDS                                              |          |
| 2558669761 | DRAFT_00429 | Product_name   | Transposase and inactivated derivatives          |          |
| 2558669761 | DRAFT_00429 | Scaffold       | DRAFT_contig_70_39_len_54107_read_count_943702.5 |          |
| 2558669761 | DRAFT_00429 | Coordinates    | 28412..29611(+)                                  |          |
| 2558669761 | DRAFT_00429 | DNA_length     | 1200bp                                           |          |
| 2558669761 | DRAFT_00429 | Protein_length | 399aa                                            |          |
| 2558669761 | DRAFT_00429 | GC             |                                                  | 0.56     |

|            |             |                |                                                                  |          |
|------------|-------------|----------------|------------------------------------------------------------------|----------|
| 2558669762 | DRAFT_00430 | Locus_type     | CDS                                                              |          |
| 2558669762 | DRAFT_00430 | Product_name   | hypothetical protein                                             |          |
| 2558669762 | DRAFT_00430 | Scaffold       | DRAFT_contig_70_39_len_54107_read_count_943702.5                 |          |
| 2558669762 | DRAFT_00430 | Coordinates    | 29608..30135(+)                                                  |          |
| 2558669762 | DRAFT_00430 | DNA_length     | 528bp                                                            |          |
| 2558669762 | DRAFT_00430 | Protein_length | 175aa                                                            |          |
| 2558669762 | DRAFT_00430 | GC             |                                                                  | 0.47     |
| 2558669762 | DRAFT_00430 | Transmembrane  | Yes                                                              |          |
|            |             |                |                                                                  |          |
| 2558669763 | DRAFT_00431 | Locus_type     | CDS                                                              |          |
| 2558669763 | DRAFT_00431 | Product_name   | hypothetical protein                                             |          |
| 2558669763 | DRAFT_00431 | Scaffold       | DRAFT_contig_70_39_len_54107_read_count_943702.5                 |          |
| 2558669763 | DRAFT_00431 | Coordinates    | 30316..30843(+)                                                  |          |
| 2558669763 | DRAFT_00431 | DNA_length     | 528bp                                                            |          |
| 2558669763 | DRAFT_00431 | Protein_length | 175aa                                                            |          |
| 2558669763 | DRAFT_00431 | GC             |                                                                  | 0.49     |
|            |             |                |                                                                  |          |
| 2558669764 | DRAFT_00432 | Locus_type     | CDS                                                              |          |
| 2558669764 | DRAFT_00432 | Product_name   | hypothetical protein                                             |          |
| 2558669764 | DRAFT_00432 | Scaffold       | DRAFT_contig_70_39_len_54107_read_count_943702.5                 |          |
| 2558669764 | DRAFT_00432 | Coordinates    | 31013..31249(-)                                                  |          |
| 2558669764 | DRAFT_00432 | DNA_length     | 237bp                                                            |          |
| 2558669764 | DRAFT_00432 | Protein_length | 78aa                                                             |          |
| 2558669764 | DRAFT_00432 | GC             |                                                                  | 0.52     |
| 2558669764 | DRAFT_00432 | Transmembrane  | Yes                                                              |          |
|            |             |                |                                                                  |          |
| 2558669765 | DRAFT_00433 | COG_category   | [O] Posttranslational modification, protein turnover, chaperones |          |
| 2558669765 | DRAFT_00433 | COG0459        | Chaperonin GroEL (HSP60 family)                                  | 0.00E+00 |
| 2558669765 | DRAFT_00433 | pfam00118      | Cpn60_TCP1                                                       | 0.00E+00 |
| 2558669765 | DRAFT_00433 | TIGR02339      | thermosome, various subunits, archaeal                           | 0.00E+00 |
| 2558669765 | DRAFT_00433 | TIGR02343      | T-complex protein 1, epsilon subunit                             | 0.00E+00 |
| 2558669765 | DRAFT_00433 | Locus_type     | CDS                                                              |          |
| 2558669765 | DRAFT_00433 | Product_name   | thermosome, various subunits, archaeal                           |          |

|            |             |                |                 |                                                  |          |
|------------|-------------|----------------|-----------------|--------------------------------------------------|----------|
| 2558669765 | DRAFT_00433 | Scaffold       |                 | DRAFT_contig_70_39_len_54107_read_count_943702.5 |          |
| 2558669765 | DRAFT_00433 | Coordinates    |                 | 31507..33150(+)                                  |          |
| 2558669765 | DRAFT_00433 | DNA_length     |                 | 1644bp                                           |          |
| 2558669765 | DRAFT_00433 | Protein_length |                 | 547aa                                            |          |
| 2558669765 | DRAFT_00433 | GC             |                 |                                                  | 0.59     |
|            |             |                |                 |                                                  |          |
| 2558669766 | DRAFT_00434 | Locus_type     |                 | CDS                                              |          |
| 2558669766 | DRAFT_00434 | Product_name   |                 | hypothetical protein                             |          |
| 2558669766 | DRAFT_00434 | Scaffold       |                 | DRAFT_contig_70_39_len_54107_read_count_943702.5 |          |
| 2558669766 | DRAFT_00434 | Coordinates    |                 | 33304..34965(-)                                  |          |
| 2558669766 | DRAFT_00434 | DNA_length     |                 | 1662bp                                           |          |
| 2558669766 | DRAFT_00434 | Protein_length |                 | 553aa                                            |          |
| 2558669766 | DRAFT_00434 | GC             |                 |                                                  | 0.58     |
|            |             |                |                 |                                                  |          |
| 2558669767 | DRAFT_00435 | pfam00589      | Phage_integrase |                                                  | 4.10E-06 |
| 2558669767 | DRAFT_00435 | Locus_type     |                 | CDS                                              |          |
| 2558669767 | DRAFT_00435 | Product_name   |                 | Phage integrase family                           |          |
| 2558669767 | DRAFT_00435 | Scaffold       |                 | DRAFT_contig_70_39_len_54107_read_count_943702.5 |          |
| 2558669767 | DRAFT_00435 | Coordinates    |                 | 35006..36211(+)                                  |          |
| 2558669767 | DRAFT_00435 | DNA_length     |                 | 1206bp                                           |          |
| 2558669767 | DRAFT_00435 | Protein_length |                 | 401aa                                            |          |
| 2558669767 | DRAFT_00435 | GC             |                 |                                                  | 0.59     |
|            |             |                |                 |                                                  |          |
| 2558669768 | DRAFT_00436 | Locus_type     |                 | CDS                                              |          |
| 2558669768 | DRAFT_00436 | Product_name   |                 | hypothetical protein                             |          |
| 2558669768 | DRAFT_00436 | Scaffold       |                 | DRAFT_contig_70_39_len_54107_read_count_943702.5 |          |
| 2558669768 | DRAFT_00436 | Coordinates    |                 | 36241..36885(-)                                  |          |
| 2558669768 | DRAFT_00436 | DNA_length     |                 | 645bp                                            |          |
| 2558669768 | DRAFT_00436 | Protein_length |                 | 214aa                                            |          |
| 2558669768 | DRAFT_00436 | GC             |                 |                                                  | 0.6      |
|            |             |                |                 |                                                  |          |
| 2558669769 | DRAFT_00437 | Locus_type     |                 | CDS                                              |          |
| 2558669769 | DRAFT_00437 | Product_name   |                 | hypothetical protein                             |          |
| 2558669769 | DRAFT_00437 | Scaffold       |                 | DRAFT_contig_70_39_len_54107_read_count_943702.5 |          |

|            |             |                |                                                  |          |
|------------|-------------|----------------|--------------------------------------------------|----------|
| 2558669769 | DRAFT_00437 | Coordinates    | 36882..38678(-)                                  |          |
| 2558669769 | DRAFT_00437 | DNA_length     | 1797bp                                           |          |
| 2558669769 | DRAFT_00437 | Protein_length | 598aa                                            |          |
| 2558669769 | DRAFT_00437 | GC             |                                                  | 0.6      |
|            |             |                |                                                  |          |
| 2558669770 | DRAFT_00438 | Locus_type     | CDS                                              |          |
| 2558669770 | DRAFT_00438 | Product_name   | hypothetical protein                             |          |
| 2558669770 | DRAFT_00438 | Scaffold       | DRAFT_contig_70_39_len_54107_read_count_943702.5 |          |
| 2558669770 | DRAFT_00438 | Coordinates    | 38861..39712(+)                                  |          |
| 2558669770 | DRAFT_00438 | DNA_length     | 852bp                                            |          |
| 2558669770 | DRAFT_00438 | Protein_length | 283aa                                            |          |
| 2558669770 | DRAFT_00438 | GC             |                                                  | 0.51     |
|            |             |                |                                                  |          |
| 2558669771 | DRAFT_00439 | Locus_type     | CDS                                              |          |
| 2558669771 | DRAFT_00439 | Product_name   | hypothetical protein                             |          |
| 2558669771 | DRAFT_00439 | Scaffold       | DRAFT_contig_70_39_len_54107_read_count_943702.5 |          |
| 2558669771 | DRAFT_00439 | Coordinates    | 39959..40396(+)                                  |          |
| 2558669771 | DRAFT_00439 | DNA_length     | 438bp                                            |          |
| 2558669771 | DRAFT_00439 | Protein_length | 145aa                                            |          |
| 2558669771 | DRAFT_00439 | GC             |                                                  | 0.55     |
|            |             |                |                                                  |          |
| 2558669772 | DRAFT_00440 | COG_category   | [S] Function unknown                             |          |
| 2558669772 | DRAFT_00440 | COG1520        | FOG: WD40-like repeat                            | 4.00E-18 |
| 2558669772 | DRAFT_00440 | pfam01011      | PQQ                                              | 3.70E-06 |
| 2558669772 | DRAFT_00440 | pfam13360      | PQQ_2                                            | 9.20E-22 |
| 2558669772 | DRAFT_00440 | pfam05048      | NosD                                             | 3.20E-14 |
| 2558669772 | DRAFT_00440 | TIGR03804      | parallel beta-helix repeat (two copies)          | 3.00E-14 |
| 2558669772 | DRAFT_00440 | Locus_type     | CDS                                              |          |
| 2558669772 | DRAFT_00440 | Product_name   | parallel beta-helix repeat (two copies)          |          |
| 2558669772 | DRAFT_00440 | Scaffold       | DRAFT_contig_70_39_len_54107_read_count_943702.5 |          |
| 2558669772 | DRAFT_00440 | Coordinates    | 40977..42755(+)                                  |          |
| 2558669772 | DRAFT_00440 | DNA_length     | 1779bp                                           |          |
| 2558669772 | DRAFT_00440 | Protein_length | 592aa                                            |          |
| 2558669772 | DRAFT_00440 | GC             |                                                  | 0.52     |



|            |             |                |                                                  |          |
|------------|-------------|----------------|--------------------------------------------------|----------|
| 2558669773 | DRAFT_00441 | Locus_type     | CDS                                              |          |
| 2558669773 | DRAFT_00441 | Product_name   | hypothetical protein                             |          |
| 2558669773 | DRAFT_00441 | Scaffold       | DRAFT_contig_70_39_len_54107_read_count_943702.5 |          |
| 2558669773 | DRAFT_00441 | Coordinates    | 42823..44565(-)                                  |          |
| 2558669773 | DRAFT_00441 | DNA_length     | 1743bp                                           |          |
| 2558669773 | DRAFT_00441 | Protein_length | 580aa                                            |          |
| 2558669773 | DRAFT_00441 | GC             |                                                  | 0.52     |
| 2558669773 | DRAFT_00441 | Transmembrane  | Yes                                              |          |
|            |             |                |                                                  |          |
| 2558669774 | DRAFT_00442 | Locus_type     | CDS                                              |          |
| 2558669774 | DRAFT_00442 | Product_name   | hypothetical protein                             |          |
| 2558669774 | DRAFT_00442 | Scaffold       | DRAFT_contig_70_39_len_54107_read_count_943702.5 |          |
| 2558669774 | DRAFT_00442 | Coordinates    | 44516..45133(-)                                  |          |
| 2558669774 | DRAFT_00442 | DNA_length     | 618bp                                            |          |
| 2558669774 | DRAFT_00442 | Protein_length | 205aa                                            |          |
| 2558669774 | DRAFT_00442 | GC             |                                                  | 0.53     |
| 2558669774 | DRAFT_00442 | Transmembrane  | Yes                                              |          |
|            |             |                |                                                  |          |
| 2558669775 | DRAFT_00443 | Locus_type     | CDS                                              |          |
| 2558669775 | DRAFT_00443 | Product_name   | hypothetical protein                             |          |
| 2558669775 | DRAFT_00443 | Scaffold       | DRAFT_contig_70_39_len_54107_read_count_943702.5 |          |
| 2558669775 | DRAFT_00443 | Coordinates    | 45272..45448(-)                                  |          |
| 2558669775 | DRAFT_00443 | DNA_length     | 177bp                                            |          |
| 2558669775 | DRAFT_00443 | Protein_length | 58aa                                             |          |
| 2558669775 | DRAFT_00443 | GC             |                                                  | 0.5      |
|            |             |                |                                                  |          |
| 2558669776 | DRAFT_00444 | pfam05048      | NosD                                             | 3.00E-08 |
| 2558669776 | DRAFT_00444 | TIGR03804      | parallel beta-helix repeat (two copies)          | 5.60E-10 |
| 2558669776 | DRAFT_00444 | Locus_type     | CDS                                              |          |
| 2558669776 | DRAFT_00444 | Product_name   | parallel beta-helix repeat (two copies)          |          |
| 2558669776 | DRAFT_00444 | Scaffold       | DRAFT_contig_70_39_len_54107_read_count_943702.5 |          |
| 2558669776 | DRAFT_00444 | Coordinates    | 45610..46002(-)                                  |          |
| 2558669776 | DRAFT_00444 | DNA_length     | 393bp                                            |          |

|            |             |                |                                                  |          |
|------------|-------------|----------------|--------------------------------------------------|----------|
| 2558669776 | DRAFT_00444 | Protein_length | 130aa                                            |          |
| 2558669776 | DRAFT_00444 | GC             |                                                  | 0.54     |
| 2558669777 | DRAFT_00445 | pfam13229      | Beta_helix                                       | 5.30E-26 |
| 2558669777 | DRAFT_00445 | TIGR03804      | parallel beta-helix repeat (two copies)          | 3.00E-08 |
| 2558669777 | DRAFT_00445 | Locus_type     | CDS                                              |          |
| 2558669777 | DRAFT_00445 | Product_name   | parallel beta-helix repeat (two copies)          |          |
| 2558669777 | DRAFT_00445 | Scaffold       | DRAFT_contig_70_39_len_54107_read_count_943702.5 |          |
| 2558669777 | DRAFT_00445 | Coordinates    | 46095..47885(+)                                  |          |
| 2558669777 | DRAFT_00445 | DNA_length     | 1791bp                                           |          |
| 2558669777 | DRAFT_00445 | Protein_length | 596aa                                            |          |
| 2558669777 | DRAFT_00445 | GC             |                                                  | 0.55     |
| 2558669777 | DRAFT_00445 | Transmembrane  | Yes                                              |          |
| 2558669778 | DRAFT_00446 | pfam05048      | NosD                                             | 2.20E-17 |
| 2558669778 | DRAFT_00446 | pfam13229      | Beta_helix                                       | 3.00E-07 |
| 2558669778 | DRAFT_00446 | pfam05048      | NosD                                             | 9.60E-16 |
| 2558669778 | DRAFT_00446 | TIGR03804      | parallel beta-helix repeat (two copies)          | 3.30E-12 |
| 2558669778 | DRAFT_00446 | Locus_type     | CDS                                              |          |
| 2558669778 | DRAFT_00446 | Product_name   | parallel beta-helix repeat (two copies)          |          |
| 2558669778 | DRAFT_00446 | Scaffold       | DRAFT_contig_70_39_len_54107_read_count_943702.5 |          |
| 2558669778 | DRAFT_00446 | Coordinates    | 48174..49832(+)                                  |          |
| 2558669778 | DRAFT_00446 | DNA_length     | 1659bp                                           |          |
| 2558669778 | DRAFT_00446 | Protein_length | 552aa                                            |          |
| 2558669778 | DRAFT_00446 | GC             |                                                  | 0.52     |
| 2558669778 | DRAFT_00446 | Signal_peptide | Yes                                              |          |
| 2558669778 | DRAFT_00446 | Transmembrane  | Yes                                              |          |
| 2558669779 | DRAFT_00447 | Locus_type     | CDS                                              |          |
| 2558669779 | DRAFT_00447 | Product_name   | hypothetical protein                             |          |
| 2558669779 | DRAFT_00447 | Scaffold       | DRAFT_contig_70_39_len_54107_read_count_943702.5 |          |
| 2558669779 | DRAFT_00447 | Coordinates    | 49858..51030(-)                                  |          |
| 2558669779 | DRAFT_00447 | DNA_length     | 1173bp                                           |          |
| 2558669779 | DRAFT_00447 | Protein_length | 390aa                                            |          |

|            |             |                |                                                                                          |          |
|------------|-------------|----------------|------------------------------------------------------------------------------------------|----------|
| 2558669779 | DRAFT_00447 | GC             |                                                                                          | 0.52     |
| 2558669779 | DRAFT_00447 | Transmembrane  | Yes                                                                                      |          |
| 2558669780 | DRAFT_00448 | Locus_type     | CDS                                                                                      |          |
| 2558669780 | DRAFT_00448 | Product_name   | hypothetical protein                                                                     |          |
| 2558669780 | DRAFT_00448 | Scaffold       | DRAFT_contig_70_39_len_54107_read_count_943702.5                                         |          |
| 2558669780 | DRAFT_00448 | Coordinates    | 51434..52984(-)                                                                          |          |
| 2558669780 | DRAFT_00448 | DNA_length     | 1551bp                                                                                   |          |
| 2558669780 | DRAFT_00448 | Protein_length | 516aa                                                                                    |          |
| 2558669780 | DRAFT_00448 | GC             |                                                                                          | 0.53     |
| 2558669780 | DRAFT_00448 | Transmembrane  | Yes                                                                                      |          |
| 2558669781 | DRAFT_00449 | pfam02661      | Fic                                                                                      | 4.80E-22 |
| 2558669781 | DRAFT_00449 | Locus_type     | CDS                                                                                      |          |
| 2558669781 | DRAFT_00449 | Product_name   | Uncharacterized conserved protein                                                        |          |
| 2558669781 | DRAFT_00449 | Scaffold       | DRAFT_contig_70_39_len_54107_read_count_943702.5                                         |          |
| 2558669781 | DRAFT_00449 | Coordinates    | 53138..54028(-)                                                                          |          |
| 2558669781 | DRAFT_00449 | DNA_length     | 891bp                                                                                    |          |
| 2558669781 | DRAFT_00449 | Protein_length | 296aa                                                                                    |          |
| 2558669781 | DRAFT_00449 | GC             |                                                                                          | 0.44     |
| 2558669782 | DRAFT_00450 | Locus_type     | CDS                                                                                      |          |
| 2558669782 | DRAFT_00450 | Product_name   | hypothetical protein                                                                     |          |
| 2558669782 | DRAFT_00450 | Scaffold       | DRAFT_contig_70_41_len_53364_read_count_885993.6                                         |          |
| 2558669782 | DRAFT_00450 | Coordinates    | 3..2792(+)                                                                               |          |
| 2558669782 | DRAFT_00450 | DNA_length     | 2790bp                                                                                   |          |
| 2558669782 | DRAFT_00450 | Protein_length | 929aa                                                                                    |          |
| 2558669782 | DRAFT_00450 | GC             |                                                                                          | 0.57     |
| 2558669782 | DRAFT_00450 | Transmembrane  | Yes                                                                                      |          |
| 2558669783 | DRAFT_00451 | Metacyc        | PWY-2301: <i>myo</i>-inositol biosynthesis                                               |          |
| 2558669783 | DRAFT_00451 | Metacyc        | PWY-6372: 1D-<i>myo</i>-inositol hexakisphosphate biosynthesis IV (<i>Dictyostelium</i>) |          |
| 2558669783 | DRAFT_00451 | Metacyc        | PWY-6580: L-1-phosphatidyl-inositol biosynthesis (Mycobacteria)                          |          |
| 2558669783 | DRAFT_00451 | Metacyc        | PWY-6664: di-<i>myo</i>-inositol phosphate biosynthesis                                  |          |

|            |             |                |                                                                                                 |           |
|------------|-------------|----------------|-------------------------------------------------------------------------------------------------|-----------|
| 2558669783 | DRAFT_00451 | Metacyc        | PWY-4661: 1D-<i>myo</i>-inositol hexakisphosphate biosynthesis III (<i>Spirodela polyrrhiza</i> |           |
| 2558669783 | DRAFT_00451 | Metacyc        | PWY1G-0: mycothiol biosynthesis                                                                 |           |
| 2558669783 | DRAFT_00451 | COG_category   | [L] Lipid transport and metabolism                                                              |           |
| 2558669783 | DRAFT_00451 | COG1260        | Myo-inositol-1-phosphate synthase                                                               | 4.00E-112 |
| 2558669783 | DRAFT_00451 | pfam07994      | NAD_binding_5                                                                                   | 5.60E-47  |
| 2558669783 | DRAFT_00451 | pfam01658      | Inos-1-P_synth                                                                                  | 2.00E-25  |
| 2558669783 | DRAFT_00451 | EC:5.5.1.4     | Inositol-3-phosphate synthase.                                                                  |           |
| 2558669783 | DRAFT_00451 | KO:K01858      | myo-inositol-1-phosphate synthase [EC:5.5.1.4]                                                  | 0.00E+00  |
| 2558669783 | DRAFT_00451 | Locus_type     | CDS                                                                                             |           |
| 2558669783 | DRAFT_00451 | Product_name   | Myo-inositol-1-phosphate synthase                                                               |           |
| 2558669783 | DRAFT_00451 | Scaffold       | DRAFT_contig_70_41_len_53364_read_count_885993.6                                                |           |
| 2558669783 | DRAFT_00451 | Coordinates    | 2767..3828(-)                                                                                   |           |
| 2558669783 | DRAFT_00451 | DNA_length     | 1062bp                                                                                          |           |
| 2558669783 | DRAFT_00451 | Protein_length | 353aa                                                                                           |           |
| 2558669783 | DRAFT_00451 | GC             |                                                                                                 | 0.59      |
| 2558669784 | DRAFT_00452 | Locus_type     | CDS                                                                                             |           |
| 2558669784 | DRAFT_00452 | Product_name   | hypothetical protein                                                                            |           |
| 2558669784 | DRAFT_00452 | Scaffold       | DRAFT_contig_70_41_len_53364_read_count_885993.6                                                |           |
| 2558669784 | DRAFT_00452 | Coordinates    | 4151..4858(+)                                                                                   |           |
| 2558669784 | DRAFT_00452 | DNA_length     | 708bp                                                                                           |           |
| 2558669784 | DRAFT_00452 | Protein_length | 235aa                                                                                           |           |
| 2558669784 | DRAFT_00452 | GC             |                                                                                                 | 0.51      |
| 2558669785 | DRAFT_00453 | Locus_type     | CDS                                                                                             |           |
| 2558669785 | DRAFT_00453 | Product_name   | hypothetical protein                                                                            |           |
| 2558669785 | DRAFT_00453 | Scaffold       | DRAFT_contig_70_41_len_53364_read_count_885993.6                                                |           |
| 2558669785 | DRAFT_00453 | Coordinates    | 4853..4987(-)                                                                                   |           |
| 2558669785 | DRAFT_00453 | DNA_length     | 135bp                                                                                           |           |
| 2558669785 | DRAFT_00453 | Protein_length | 44aa                                                                                            |           |
| 2558669785 | DRAFT_00453 | GC             |                                                                                                 | 0.51      |
| 2558669786 | DRAFT_00454 | COG_category   | [L] Replication, recombination and repair                                                       |           |
| 2558669786 | DRAFT_00454 | COG3316        | Transposase and inactivated derivatives                                                         | 5.00E-12  |

|            |             |                |                                                  |          |
|------------|-------------|----------------|--------------------------------------------------|----------|
| 2558669786 | DRAFT_00454 | pfam13610      | DDE_Tnp_IS240                                    | 3.20E-22 |
| 2558669786 | DRAFT_00454 | pfam04434      | SWIM                                             | 5.60E-08 |
| 2558669786 | DRAFT_00454 | Locus_type     | CDS                                              |          |
| 2558669786 | DRAFT_00454 | Product_name   | Transposase and inactivated derivatives          |          |
| 2558669786 | DRAFT_00454 | Scaffold       | DRAFT_contig_70_41_len_53364_read_count_885993.6 |          |
| 2558669786 | DRAFT_00454 | Coordinates    | 5038..6282(+)                                    |          |
| 2558669786 | DRAFT_00454 | DNA_length     | 1245bp                                           |          |
| 2558669786 | DRAFT_00454 | Protein_length | 414aa                                            |          |
| 2558669786 | DRAFT_00454 | GC             |                                                  | 0.55     |
| 2558669787 | DRAFT_00455 | Locus_type     | CDS                                              |          |
| 2558669787 | DRAFT_00455 | Product_name   | hypothetical protein                             |          |
| 2558669787 | DRAFT_00455 | Scaffold       | DRAFT_contig_70_41_len_53364_read_count_885993.6 |          |
| 2558669787 | DRAFT_00455 | Coordinates    | 6279..6761(+)                                    |          |
| 2558669787 | DRAFT_00455 | DNA_length     | 483bp                                            |          |
| 2558669787 | DRAFT_00455 | Protein_length | 160aa                                            |          |
| 2558669787 | DRAFT_00455 | GC             |                                                  | 0.48     |
| 2558669788 | DRAFT_00456 | Locus_type     | CDS                                              |          |
| 2558669788 | DRAFT_00456 | Product_name   | hypothetical protein                             |          |
| 2558669788 | DRAFT_00456 | Scaffold       | DRAFT_contig_70_41_len_53364_read_count_885993.6 |          |
| 2558669788 | DRAFT_00456 | Coordinates    | 6893..7297(+)                                    |          |
| 2558669788 | DRAFT_00456 | DNA_length     | 405bp                                            |          |
| 2558669788 | DRAFT_00456 | Protein_length | 134aa                                            |          |
| 2558669788 | DRAFT_00456 | GC             |                                                  | 0.47     |
| 2558669788 | DRAFT_00456 | Transmembrane  | Yes                                              |          |
| 2558669789 | DRAFT_00457 | Locus_type     | CDS                                              |          |
| 2558669789 | DRAFT_00457 | Product_name   | hypothetical protein                             |          |
| 2558669789 | DRAFT_00457 | Scaffold       | DRAFT_contig_70_41_len_53364_read_count_885993.6 |          |
| 2558669789 | DRAFT_00457 | Coordinates    | 7294..7437(-)                                    |          |
| 2558669789 | DRAFT_00457 | DNA_length     | 144bp                                            |          |
| 2558669789 | DRAFT_00457 | Protein_length | 47aa                                             |          |
| 2558669789 | DRAFT_00457 | GC             |                                                  | 0.45     |

|            |             |                |                                                                    |          |
|------------|-------------|----------------|--------------------------------------------------------------------|----------|
| 2558669790 | DRAFT_00458 | COG_category   | [L] Replication, recombination and repair                          |          |
| 2558669790 | DRAFT_00458 | COG_category   | [R] General function prediction only                               |          |
| 2558669790 | DRAFT_00458 | COG0494        | NTP pyrophosphohydrolases including oxidative damage repair enzyme | 2.00E-06 |
| 2558669790 | DRAFT_00458 | pfam00293      | NUDIX                                                              | 5.80E-14 |
| 2558669790 | DRAFT_00458 | Locus_type     | CDS                                                                |          |
| 2558669790 | DRAFT_00458 | Product_name   | NTP pyrophosphohydrolases including oxidative damage repair enzym  |          |
| 2558669790 | DRAFT_00458 | Scaffold       | DRAFT_contig_70_41_len_53364_read_count_885993.6                   |          |
| 2558669790 | DRAFT_00458 | Coordinates    | 7533..7973(+)                                                      |          |
| 2558669790 | DRAFT_00458 | DNA_length     | 441bp                                                              |          |
| 2558669790 | DRAFT_00458 | Protein_length | 146aa                                                              |          |
| 2558669790 | DRAFT_00458 | GC             |                                                                    | 0.57     |
| 2558669791 | DRAFT_00459 | Locus_type     | CDS                                                                |          |
| 2558669791 | DRAFT_00459 | Product_name   | hypothetical protein                                               |          |
| 2558669791 | DRAFT_00459 | Scaffold       | DRAFT_contig_70_41_len_53364_read_count_885993.6                   |          |
| 2558669791 | DRAFT_00459 | Coordinates    | 7964..8728(-)                                                      |          |
| 2558669791 | DRAFT_00459 | DNA_length     | 765bp                                                              |          |
| 2558669791 | DRAFT_00459 | Protein_length | 254aa                                                              |          |
| 2558669791 | DRAFT_00459 | GC             |                                                                    | 0.54     |
| 2558669792 | DRAFT_00460 | Locus_type     | CDS                                                                |          |
| 2558669792 | DRAFT_00460 | Product_name   | hypothetical protein                                               |          |
| 2558669792 | DRAFT_00460 | Scaffold       | DRAFT_contig_70_41_len_53364_read_count_885993.6                   |          |
| 2558669792 | DRAFT_00460 | Coordinates    | 8766..9134(+)                                                      |          |
| 2558669792 | DRAFT_00460 | DNA_length     | 369bp                                                              |          |
| 2558669792 | DRAFT_00460 | Protein_length | 122aa                                                              |          |
| 2558669792 | DRAFT_00460 | GC             |                                                                    | 0.56     |
| 2558669793 | DRAFT_00461 | Locus_type     | CDS                                                                |          |
| 2558669793 | DRAFT_00461 | Product_name   | hypothetical protein                                               |          |
| 2558669793 | DRAFT_00461 | Scaffold       | DRAFT_contig_70_41_len_53364_read_count_885993.6                   |          |
| 2558669793 | DRAFT_00461 | Coordinates    | 9097..9567(-)                                                      |          |
| 2558669793 | DRAFT_00461 | DNA_length     | 471bp                                                              |          |

|            |             |                |                                                                                             |          |
|------------|-------------|----------------|---------------------------------------------------------------------------------------------|----------|
| 2558669793 | DRAFT_00461 | Protein_length | 156aa                                                                                       |          |
| 2558669793 | DRAFT_00461 | GC             |                                                                                             | 0.55     |
| 2558669794 | DRAFT_00462 | COG_category   | [I] Lipid transport and metabolism                                                          |          |
| 2558669794 | DRAFT_00462 | COG0020        | Undecaprenyl pyrophosphate synthase                                                         | 1.00E-72 |
| 2558669794 | DRAFT_00462 | pfam01255      | Prenyltransf                                                                                | 2.60E-77 |
| 2558669794 | DRAFT_00462 | EC:2.5.1.89    | Tritrans, polycis-undecaprenyl-diphosphate synthase (geranylgeranyl- diphosphate specific). |          |
| 2558669794 | DRAFT_00462 | TIGR00055      | undecaprenyl diphosphate synthase                                                           | 5.80E-75 |
| 2558669794 | DRAFT_00462 | KO:K15888      | tritrans, polycis-undecaprenyl-diphosphate synthase [geranylgeranyl-di]                     | 0.00E+00 |
| 2558669794 | DRAFT_00462 | Locus_type     | CDS                                                                                         |          |
| 2558669794 | DRAFT_00462 | Product_name   | Undecaprenyl pyrophosphate synthetase (EC 2.5.1.31)                                         |          |
| 2558669794 | DRAFT_00462 | Scaffold       | DRAFT_contig_70_41_len_53364_read_count_885993.6                                            |          |
| 2558669794 | DRAFT_00462 | Coordinates    | 9609..10391(-)                                                                              |          |
| 2558669794 | DRAFT_00462 | DNA_length     | 783bp                                                                                       |          |
| 2558669794 | DRAFT_00462 | Protein_length | 260aa                                                                                       |          |
| 2558669794 | DRAFT_00462 | GC             |                                                                                             | 0.57     |
| 2558669795 | DRAFT_00463 | COG_category   | [S] Function unknown                                                                        |          |
| 2558669795 | DRAFT_00463 | COG2237        | Predicted membrane protein                                                                  | 1.00E-56 |
| 2558669795 | DRAFT_00463 | pfam04123      | DUF373                                                                                      | 1.50E-91 |
| 2558669795 | DRAFT_00463 | KO:K08975      | putative membrane protein                                                                   | 0.00E+00 |
| 2558669795 | DRAFT_00463 | Locus_type     | CDS                                                                                         |          |
| 2558669795 | DRAFT_00463 | Product_name   | Predicted membrane protein                                                                  |          |
| 2558669795 | DRAFT_00463 | Scaffold       | DRAFT_contig_70_41_len_53364_read_count_885993.6                                            |          |
| 2558669795 | DRAFT_00463 | Coordinates    | 10395..11489(-)                                                                             |          |
| 2558669795 | DRAFT_00463 | DNA_length     | 1095bp                                                                                      |          |
| 2558669795 | DRAFT_00463 | Protein_length | 364aa                                                                                       |          |
| 2558669795 | DRAFT_00463 | GC             |                                                                                             | 0.58     |
| 2558669795 | DRAFT_00463 | Transmembrane  | Yes                                                                                         |          |
| 2558669796 | DRAFT_00464 | KEGG_module    | M00373: Ethylmalonyl pathway                                                                |          |
| 2558669796 | DRAFT_00464 | KEGG_module    | M00375: Hydroxypropionate-hydroxybutylate cycle                                             |          |
| 2558669796 | DRAFT_00464 | KEGG_module    | M00088: Ketone body biosynthesis, acetyl-CoA => acetoacetate/3-hydroxybutyrate/acetone      |          |
| 2558669796 | DRAFT_00464 | KEGG_module    | M00374: Dicarboxylate-hydroxybutyrate cycle                                                 |          |

|            |             |                |                                                                |          |
|------------|-------------|----------------|----------------------------------------------------------------|----------|
| 2558669796 | DRAFT_00464 | KEGG_module    | M00095: C5 isoprenoid biosynthesis, mevalonate pathway         |          |
| 2558669796 | DRAFT_00464 | Metacyc        | PWY1-3: polyhydroxybutyrate biosynthesis                       |          |
| 2558669796 | DRAFT_00464 | Metacyc        | PWY-5741: ethylmalonyl pathway                                 |          |
| 2558669796 | DRAFT_00464 | Metacyc        | PWY-6863: pyruvate fermentation to hexanol                     |          |
| 2558669796 | DRAFT_00464 | Metacyc        | PWY-6583: pyruvate fermentation to butanol I                   |          |
| 2558669796 | DRAFT_00464 | Metacyc        | PWY-5676: acetyl-CoA fermentation to butyrate II               |          |
| 2558669796 | DRAFT_00464 | Metacyc        | PWY66-367: ketogenesis                                         |          |
| 2558669796 | DRAFT_00464 | Metacyc        | PWY-6883: pyruvate fermentation to butanol II                  |          |
| 2558669796 | DRAFT_00464 | Metacyc        | PWY-6876: isopropanol biosynthesis                             |          |
| 2558669796 | DRAFT_00464 | Metacyc        | PWY-7003: glycerol degradation to butanol                      |          |
| 2558669796 | DRAFT_00464 | Metacyc        | PWY-922: mevalonate pathway I                                  |          |
| 2558669796 | DRAFT_00464 | Metacyc        | PWY-6174: mevalonate pathway II (archaea)                      |          |
| 2558669796 | DRAFT_00464 | Metacyc        | PWY66-368: ketolysis                                           |          |
| 2558669796 | DRAFT_00464 | Metacyc        | ILEUDEG-PWY: isoleucine degradation I                          |          |
| 2558669796 | DRAFT_00464 | Metacyc        | P163-PWY: lysine fermentation to acetate and butyrate          |          |
| 2558669796 | DRAFT_00464 | Metacyc        | PWY-5177: glutaryl-CoA degradation                             |          |
| 2558669796 | DRAFT_00464 | Metacyc        | PWY-5109: 2-methylbutyrate biosynthesis                        |          |
| 2558669796 | DRAFT_00464 | Metacyc        | CENTFERM-PWY: pyruvate fermentation to butanoate               |          |
| 2558669796 | DRAFT_00464 | Metacyc        | ACETOACETATE-DEG-PWY: acetoacetate degradation (to acetyl CoA) |          |
| 2558669796 | DRAFT_00464 | Metacyc        | PWY-6588: pyruvate fermentation to acetone                     |          |
| 2558669796 | DRAFT_00464 | Metacyc        | PWY-5789: 3-hydroxypropionate/4-hydroxybutyrate cycle          |          |
| 2558669796 | DRAFT_00464 | COG_category   | [I] Lipid transport and metabolism                             |          |
| 2558669796 | DRAFT_00464 | COG0183        | Acetyl-CoA acetyltransferase                                   | 3.00E-85 |
| 2558669796 | DRAFT_00464 | pfam02803      | Thiolase_C                                                     | 1.40E-43 |
| 2558669796 | DRAFT_00464 | pfam00108      | Thiolase_N                                                     | 4.10E-94 |
| 2558669796 | DRAFT_00464 | EC:2.3.1.9     | Acetyl-CoA C-acetyltransferase.                                |          |
| 2558669796 | DRAFT_00464 | TIGR01930      | acetyl-CoA acetyltransferases                                  | 0.00E+00 |
| 2558669796 | DRAFT_00464 | KO:K00626      | acetyl-CoA C-acetyltransferase [EC:2.3.1.9]                    | 0.00E+00 |
| 2558669796 | DRAFT_00464 | Locus_type     | CDS                                                            |          |
| 2558669796 | DRAFT_00464 | Product_name   | acetyl-CoA acetyltransferase (EC 2.3.1.9)                      |          |
| 2558669796 | DRAFT_00464 | Scaffold       | DRAFT_contig_70_41_len_53364_read_count_885993.6               |          |
| 2558669796 | DRAFT_00464 | Coordinates    | 11705..12883(-)                                                |          |
| 2558669796 | DRAFT_00464 | DNA_length     | 1179bp                                                         |          |
| 2558669796 | DRAFT_00464 | Protein_length | 392aa                                                          |          |



|            |             |                |                                                                                           |           |
|------------|-------------|----------------|-------------------------------------------------------------------------------------------|-----------|
| 2558669796 | DRAFT_00464 | GC             |                                                                                           | 0.6       |
| 2558669797 | DRAFT_00465 | KEGG_module    | M00119: Pantothenate biosynthesis, valine/L-aspartate => pantothenate                     |           |
| 2558669797 | DRAFT_00465 | KEGG_module    | M00570: Isoleucine biosynthesis, threonine => 2-oxobutanoate => isoleucine                |           |
| 2558669797 | DRAFT_00465 | KEGG_module    | M00019: Valine/isoleucine biosynthesis, pyruvate => valine / 2-oxobutanoate => isoleucine |           |
| 2558669797 | DRAFT_00465 | KEGG_module    | M00036: Leucine degradation, leucine => acetoacetate + acetyl-CoA                         |           |
| 2558669797 | DRAFT_00465 | Metacyc        | PWY-5108: isoleucine biosynthesis V                                                       |           |
| 2558669797 | DRAFT_00465 | Metacyc        | VALDEG-PWY: valine degradation I                                                          |           |
| 2558669797 | DRAFT_00465 | Metacyc        | LEU-DEG2-PWY: leucine degradation I                                                       |           |
| 2558669797 | DRAFT_00465 | Metacyc        | PWY-5078: isoleucine degradation II                                                       |           |
| 2558669797 | DRAFT_00465 | Metacyc        | ALANINE-VALINESYN-PWY: alanine biosynthesis I                                             |           |
| 2558669797 | DRAFT_00465 | Metacyc        | PWY-5104: isoleucine biosynthesis IV                                                      |           |
| 2558669797 | DRAFT_00465 | Metacyc        | LEUSYN-PWY: leucine biosynthesis                                                          |           |
| 2558669797 | DRAFT_00465 | Metacyc        | PWY-5076: leucine degradation III                                                         |           |
| 2558669797 | DRAFT_00465 | Metacyc        | PWY-5101: isoleucine biosynthesis II                                                      |           |
| 2558669797 | DRAFT_00465 | Metacyc        | VALSYN-PWY: valine biosynthesis                                                           |           |
| 2558669797 | DRAFT_00465 | Metacyc        | PWY-5057: valine degradation II                                                           |           |
| 2558669797 | DRAFT_00465 | Metacyc        | ILEUDEG-PWY: isoleucine degradation I                                                     |           |
| 2558669797 | DRAFT_00465 | Metacyc        | PWY-5103: isoleucine biosynthesis III                                                     |           |
| 2558669797 | DRAFT_00465 | Metacyc        | ILEUSYN-PWY: isoleucine biosynthesis I (from threonine)                                   |           |
| 2558669797 | DRAFT_00465 | COG_category   | [E] Amino acid transport and metabolism                                                   |           |
| 2558669797 | DRAFT_00465 | COG_category   | [H] Coenzyme transport and metabolism                                                     |           |
| 2558669797 | DRAFT_00465 | COG0115        | Branched-chain amino acid aminotransferase/4-amino-4-deoxychorismate synthase             | 8.00E-67  |
| 2558669797 | DRAFT_00465 | pfam01063      | Aminotran_4                                                                               | 4.70E-43  |
| 2558669797 | DRAFT_00465 | EC:2.6.1.42    | Branched-chain-amino-acid transaminase.                                                   |           |
| 2558669797 | DRAFT_00465 | TIGR01122      | branched-chain amino acid aminotransferase, group I                                       | 4.30E-122 |
| 2558669797 | DRAFT_00465 | KO:K00826      | branched-chain amino acid aminotransferase [EC:2.6.1.42]                                  | 0.00E+00  |
| 2558669797 | DRAFT_00465 | Locus_type     | CDS                                                                                       |           |
| 2558669797 | DRAFT_00465 | Product_name   | branched-chain amino acid aminotransferase, group I                                       |           |
| 2558669797 | DRAFT_00465 | Scaffold       | DRAFT_contig_70_41_len_53364_read_count_885993.6                                          |           |
| 2558669797 | DRAFT_00465 | Coordinates    | 12953..13897(+)                                                                           |           |
| 2558669797 | DRAFT_00465 | DNA_length     | 945bp                                                                                     |           |
| 2558669797 | DRAFT_00465 | Protein_length | 314aa                                                                                     |           |
| 2558669797 | DRAFT_00465 | GC             |                                                                                           | 0.56      |

|            |             |                |                                                               |           |
|------------|-------------|----------------|---------------------------------------------------------------|-----------|
| 2558669798 | DRAFT_00466 | COG_category   | [R] General function prediction only                          |           |
| 2558669798 | DRAFT_00466 | COG1545        | Predicted nucleic-acid-binding protein containing a Zn-ribbon | 3.00E-18  |
| 2558669798 | DRAFT_00466 | Locus_type     | CDS                                                           |           |
| 2558669798 | DRAFT_00466 | Product_name   | Predicted nucleic-acid-binding protein containing a Zn-ribbon |           |
| 2558669798 | DRAFT_00466 | Scaffold       | DRAFT_contig_70_41_len_53364_read_count_885993.6              |           |
| 2558669798 | DRAFT_00466 | Coordinates    | 13899..14360(-)                                               |           |
| 2558669798 | DRAFT_00466 | DNA_length     | 462bp                                                         |           |
| 2558669798 | DRAFT_00466 | Protein_length | 153aa                                                         |           |
| 2558669798 | DRAFT_00466 | GC             |                                                               | 0.6       |
|            |             |                |                                                               |           |
| 2558669799 | DRAFT_00467 | COG_category   | [R] General function prediction only                          |           |
| 2558669799 | DRAFT_00467 | COG1545        | Predicted nucleic-acid-binding protein containing a Zn-ribbon | 1.00E-27  |
| 2558669799 | DRAFT_00467 | pfam01796      | DUF35                                                         | 8.50E-11  |
| 2558669799 | DRAFT_00467 | pfam12172      | DUF35_N                                                       | 1.20E-05  |
| 2558669799 | DRAFT_00467 | Locus_type     | CDS                                                           |           |
| 2558669799 | DRAFT_00467 | Product_name   | Predicted nucleic-acid-binding protein containing a Zn-ribbon |           |
| 2558669799 | DRAFT_00467 | Scaffold       | DRAFT_contig_70_41_len_53364_read_count_885993.6              |           |
| 2558669799 | DRAFT_00467 | Coordinates    | 14363..14872(-)                                               |           |
| 2558669799 | DRAFT_00467 | DNA_length     | 510bp                                                         |           |
| 2558669799 | DRAFT_00467 | Protein_length | 169aa                                                         |           |
| 2558669799 | DRAFT_00467 | GC             |                                                               | 0.57      |
|            |             |                |                                                               |           |
| 2558669800 | DRAFT_00468 | COG_category   | [I] Lipid transport and metabolism                            |           |
| 2558669800 | DRAFT_00468 | COG0365        | Acyl-coenzyme A synthetases/AMP-(fatty) acid ligases          | 4.00E-120 |
| 2558669800 | DRAFT_00468 | pfam00501      | AMP-binding                                                   | 6.60E-54  |
| 2558669800 | DRAFT_00468 | pfam13193      | AMP-binding_C                                                 | 2.70E-06  |
| 2558669800 | DRAFT_00468 | EC:6.2.1.16    | Acetoacetate--CoA ligase.                                     |           |
| 2558669800 | DRAFT_00468 | TIGR01217      | acetoacetyl-CoA synthase                                      | 0.00E+00  |
| 2558669800 | DRAFT_00468 | KO:K01907      | acetoacetyl-CoA synthetase [EC:6.2.1.16]                      | 0.00E+00  |
| 2558669800 | DRAFT_00468 | Locus_type     | CDS                                                           |           |
| 2558669800 | DRAFT_00468 | Product_name   | acetoacetyl-CoA synthase                                      |           |
| 2558669800 | DRAFT_00468 | Scaffold       | DRAFT_contig_70_41_len_53364_read_count_885993.6              |           |
| 2558669800 | DRAFT_00468 | Coordinates    | 14904..16883(-)                                               |           |

|            |             |                |                                                                                        |          |
|------------|-------------|----------------|----------------------------------------------------------------------------------------|----------|
| 2558669800 | DRAFT_00468 | DNA_length     | 1980bp                                                                                 |          |
| 2558669800 | DRAFT_00468 | Protein_length | 659aa                                                                                  |          |
| 2558669800 | DRAFT_00468 | GC             |                                                                                        | 0.62     |
| 2558669801 | DRAFT_00469 | KEGG_module    | M00373: Ethylmalonyl pathway                                                           |          |
| 2558669801 | DRAFT_00469 | KEGG_module    | M00375: Hydroxypropionate-hydroxybutylate cycle                                        |          |
| 2558669801 | DRAFT_00469 | KEGG_module    | M00374: Dicarboxylate-hydroxybutyrate cycle                                            |          |
| 2558669801 | DRAFT_00469 | KEGG_module    | M00088: Ketone body biosynthesis, acetyl-CoA => acetoacetate/3-hydroxybutyrate/acetone |          |
| 2558669801 | DRAFT_00469 | KEGG_module    | M00095: C5 isoprenoid biosynthesis, mevalonate pathway                                 |          |
| 2558669801 | DRAFT_00469 | Metacyc        | PWY-922: mevalonate pathway I                                                          |          |
| 2558669801 | DRAFT_00469 | Metacyc        | PWY-5741: ethylmalonyl pathway                                                         |          |
| 2558669801 | DRAFT_00469 | Metacyc        | PWY1-3: polyhydroxybutyrate biosynthesis                                               |          |
| 2558669801 | DRAFT_00469 | Metacyc        | PWY-5109: 2-methylbutyrate biosynthesis                                                |          |
| 2558669801 | DRAFT_00469 | Metacyc        | P163-PWY: lysine fermentation to acetate and butyrate                                  |          |
| 2558669801 | DRAFT_00469 | Metacyc        | PWY-7003: glycerol degradation to butanol                                              |          |
| 2558669801 | DRAFT_00469 | Metacyc        | PWY-6883: pyruvate fermentation to butanol II                                          |          |
| 2558669801 | DRAFT_00469 | Metacyc        | PWY-6583: pyruvate fermentation to butanol I                                           |          |
| 2558669801 | DRAFT_00469 | Metacyc        | ILEUDEG-PWY: isoleucine degradation I                                                  |          |
| 2558669801 | DRAFT_00469 | Metacyc        | ACETOACETATE-DEG-PWY: acetoacetate degradation (to acetyl CoA)                         |          |
| 2558669801 | DRAFT_00469 | Metacyc        | PWY-5676: acetyl-CoA fermentation to butyrate II                                       |          |
| 2558669801 | DRAFT_00469 | Metacyc        | PWY-6588: pyruvate fermentation to acetone                                             |          |
| 2558669801 | DRAFT_00469 | Metacyc        | PWY66-368: ketolysis                                                                   |          |
| 2558669801 | DRAFT_00469 | Metacyc        | CENTFERM-PWY: pyruvate fermentation to butanoate                                       |          |
| 2558669801 | DRAFT_00469 | Metacyc        | PWY66-367: ketogenesis                                                                 |          |
| 2558669801 | DRAFT_00469 | Metacyc        | PWY-6174: mevalonate pathway II (archaea)                                              |          |
| 2558669801 | DRAFT_00469 | Metacyc        | PWY-6876: isopropanol biosynthesis                                                     |          |
| 2558669801 | DRAFT_00469 | Metacyc        | PWY-6863: pyruvate fermentation to hexanol                                             |          |
| 2558669801 | DRAFT_00469 | Metacyc        | PWY-5177: glutaryl-CoA degradation                                                     |          |
| 2558669801 | DRAFT_00469 | Metacyc        | PWY-5789: 3-hydroxypropionate/4-hydroxybutyrate cycle                                  |          |
| 2558669801 | DRAFT_00469 | COG_category   | [I] Lipid transport and metabolism                                                     |          |
| 2558669801 | DRAFT_00469 | COG0183        | Acetyl-CoA acetyltransferase                                                           | 5.00E-72 |
| 2558669801 | DRAFT_00469 | EC:2.3.1.9     | Acetyl-CoA C-acetyltransferase.                                                        |          |
| 2558669801 | DRAFT_00469 | KO:K00626      | acetyl-CoA C-acetyltransferase [EC:2.3.1.9]                                            | 0.00E+00 |
| 2558669801 | DRAFT_00469 | Locus_type     | CDS                                                                                    |          |

|            |             |                |                                                                                        |          |
|------------|-------------|----------------|----------------------------------------------------------------------------------------|----------|
| 2558669801 | DRAFT_00469 | Product_name   | Acetyl-CoA acetyltransferase                                                           |          |
| 2558669801 | DRAFT_00469 | Scaffold       | DRAFT_contig_70_41_len_53364_read_count_885993.6                                       |          |
| 2558669801 | DRAFT_00469 | Coordinates    | 16891..18048(-)                                                                        |          |
| 2558669801 | DRAFT_00469 | DNA_length     | 1158bp                                                                                 |          |
| 2558669801 | DRAFT_00469 | Protein_length | 385aa                                                                                  |          |
| 2558669801 | DRAFT_00469 | GC             |                                                                                        | 0.59     |
| 2558669802 | DRAFT_00470 | KEGG_module    | M00374: Dicarboxylate-hydroxybutyrate cycle                                            |          |
| 2558669802 | DRAFT_00470 | KEGG_module    | M00095: C5 isoprenoid biosynthesis, mevalonate pathway                                 |          |
| 2558669802 | DRAFT_00470 | KEGG_module    | M00375: Hydroxypropionate-hydroxybutylate cycle                                        |          |
| 2558669802 | DRAFT_00470 | KEGG_module    | M00373: Ethylmalonyl pathway                                                           |          |
| 2558669802 | DRAFT_00470 | KEGG_module    | M00088: Ketone body biosynthesis, acetyl-CoA => acetoacetate/3-hydroxybutyrate/acetone |          |
| 2558669802 | DRAFT_00470 | Metacyc        | PWY-6863: pyruvate fermentation to hexanol                                             |          |
| 2558669802 | DRAFT_00470 | Metacyc        | PWY-6876: isopropanol biosynthesis                                                     |          |
| 2558669802 | DRAFT_00470 | Metacyc        | PWY-7003: glycerol degradation to butanol                                              |          |
| 2558669802 | DRAFT_00470 | Metacyc        | PWY-6174: mevalonate pathway II (archaea)                                              |          |
| 2558669802 | DRAFT_00470 | Metacyc        | PWY-6588: pyruvate fermentation to acetone                                             |          |
| 2558669802 | DRAFT_00470 | Metacyc        | PWY66-368: ketolysis                                                                   |          |
| 2558669802 | DRAFT_00470 | Metacyc        | PWY66-367: ketogenesis                                                                 |          |
| 2558669802 | DRAFT_00470 | Metacyc        | PWY-5741: ethylmalonyl pathway                                                         |          |
| 2558669802 | DRAFT_00470 | Metacyc        | P163-PWY: lysine fermentation to acetate and butyrate                                  |          |
| 2558669802 | DRAFT_00470 | Metacyc        | ILEUDEG-PWY: isoleucine degradation I                                                  |          |
| 2558669802 | DRAFT_00470 | Metacyc        | PWY-5109: 2-methylbutyrate biosynthesis                                                |          |
| 2558669802 | DRAFT_00470 | Metacyc        | PWY-6583: pyruvate fermentation to butanol I                                           |          |
| 2558669802 | DRAFT_00470 | Metacyc        | PWY-5177: glutaryl-CoA degradation                                                     |          |
| 2558669802 | DRAFT_00470 | Metacyc        | PWY-922: mevalonate pathway I                                                          |          |
| 2558669802 | DRAFT_00470 | Metacyc        | CENTFERM-PWY: pyruvate fermentation to butanoate                                       |          |
| 2558669802 | DRAFT_00470 | Metacyc        | PWY-5789: 3-hydroxypropionate/4-hydroxybutyrate cycle                                  |          |
| 2558669802 | DRAFT_00470 | Metacyc        | PWY1-3: polyhydroxybutyrate biosynthesis                                               |          |
| 2558669802 | DRAFT_00470 | Metacyc        | PWY-6883: pyruvate fermentation to butanol II                                          |          |
| 2558669802 | DRAFT_00470 | Metacyc        | PWY-5676: acetyl-CoA fermentation to butyrate II                                       |          |
| 2558669802 | DRAFT_00470 | Metacyc        | ACETOACETATE-DEG-PWY: acetoacetate degradation (to acetyl CoA)                         |          |
| 2558669802 | DRAFT_00470 | COG_category   | [I] Lipid transport and metabolism                                                     |          |
| 2558669802 | DRAFT_00470 | COG0183        | Acetyl-CoA acetyltransferase                                                           | 4.00E-21 |

|            |             |                |                                                  |          |
|------------|-------------|----------------|--------------------------------------------------|----------|
| 2558669802 | DRAFT_00470 | EC:2.3.1.9     | Acetyl-CoA C-acetyltransferase.                  |          |
| 2558669802 | DRAFT_00470 | KO:K00626      | acetyl-CoA C-acetyltransferase [EC:2.3.1.9]      | 0.00E+00 |
| 2558669802 | DRAFT_00470 | Locus_type     | CDS                                              |          |
| 2558669802 | DRAFT_00470 | Product_name   | Acetyl-CoA acetyltransferase                     |          |
| 2558669802 | DRAFT_00470 | Scaffold       | DRAFT_contig_70_41_len_53364_read_count_885993.6 |          |
| 2558669802 | DRAFT_00470 | Coordinates    | 18053..19186(-)                                  |          |
| 2558669802 | DRAFT_00470 | DNA_length     | 1134bp                                           |          |
| 2558669802 | DRAFT_00470 | Protein_length | 377aa                                            |          |
| 2558669802 | DRAFT_00470 | GC             |                                                  | 0.61     |
| 2558669803 | DRAFT_00471 | COG_category   | [I] Lipid transport and metabolism               |          |
| 2558669803 | DRAFT_00471 | COG1960        | Acyl-CoA dehydrogenases                          | 4.00E-83 |
| 2558669803 | DRAFT_00471 | pfam02771      | Acyl-CoA_dh_N                                    | 1.80E-16 |
| 2558669803 | DRAFT_00471 | pfam02770      | Acyl-CoA_dh_M                                    | 2.10E-20 |
| 2558669803 | DRAFT_00471 | pfam00441      | Acyl-CoA_dh_1                                    | 1.40E-40 |
| 2558669803 | DRAFT_00471 | Locus_type     | CDS                                              |          |
| 2558669803 | DRAFT_00471 | Product_name   | Acyl-CoA dehydrogenases                          |          |
| 2558669803 | DRAFT_00471 | Scaffold       | DRAFT_contig_70_41_len_53364_read_count_885993.6 |          |
| 2558669803 | DRAFT_00471 | Coordinates    | 19307..20512(+)                                  |          |
| 2558669803 | DRAFT_00471 | DNA_length     | 1206bp                                           |          |
| 2558669803 | DRAFT_00471 | Protein_length | 401aa                                            |          |
| 2558669803 | DRAFT_00471 | GC             |                                                  | 0.58     |
| 2558669804 | DRAFT_00472 | COG_category   | [C] Energy production and conversion             |          |
| 2558669804 | DRAFT_00472 | COG2086        | Electron transfer flavoprotein, beta subunit     | 1.00E-52 |
| 2558669804 | DRAFT_00472 | pfam01012      | ETF                                              | 7.30E-33 |
| 2558669804 | DRAFT_00472 | KO:K03521      | electron transfer flavoprotein beta subunit      | 0.00E+00 |
| 2558669804 | DRAFT_00472 | ITERM:01639    | electron transfer flavoprotein beta subunit      |          |
| 2558669804 | DRAFT_00472 | Locus_type     | CDS                                              |          |
| 2558669804 | DRAFT_00472 | Product_name   | electron transfer flavoprotein beta subunit      |          |
| 2558669804 | DRAFT_00472 | Scaffold       | DRAFT_contig_70_41_len_53364_read_count_885993.6 |          |
| 2558669804 | DRAFT_00472 | Coordinates    | 20509..21276(+)                                  |          |
| 2558669804 | DRAFT_00472 | DNA_length     | 768bp                                            |          |
| 2558669804 | DRAFT_00472 | Protein_length | 255aa                                            |          |

|            |             |                |                                                              |          |
|------------|-------------|----------------|--------------------------------------------------------------|----------|
| 2558669804 | DRAFT_00472 | GC             |                                                              | 0.62     |
| 2558669805 | DRAFT_00473 | COG_category   | [C] Energy production and conversion                         |          |
| 2558669805 | DRAFT_00473 | COG2025        | Electron transfer flavoprotein, alpha subunit                | 3.00E-55 |
| 2558669805 | DRAFT_00473 | pfam01012      | ETF                                                          | 1.40E-13 |
| 2558669805 | DRAFT_00473 | pfam00766      | ETF_alpha                                                    | 2.70E-30 |
| 2558669805 | DRAFT_00473 | KO:K03522      | electron transfer flavoprotein alpha subunit                 | 0.00E+00 |
| 2558669805 | DRAFT_00473 | ITERM:01638    | electron transfer flavoprotein alpha subunit apoprotein      |          |
| 2558669805 | DRAFT_00473 | Locus_type     | CDS                                                          |          |
| 2558669805 | DRAFT_00473 | Product_name   | electron transfer flavoprotein alpha subunit apoprotein      |          |
| 2558669805 | DRAFT_00473 | Scaffold       | DRAFT_contig_70_41_len_53364_read_count_885993.6             |          |
| 2558669805 | DRAFT_00473 | Coordinates    | 21273..22205(+)                                              |          |
| 2558669805 | DRAFT_00473 | DNA_length     | 933bp                                                        |          |
| 2558669805 | DRAFT_00473 | Protein_length | 310aa                                                        |          |
| 2558669805 | DRAFT_00473 | GC             |                                                              | 0.63     |
| 2558669806 | DRAFT_00474 | COG_category   | [C] Energy production and conversion                         |          |
| 2558669806 | DRAFT_00474 | COG0247        | Fe-S oxidoreductase                                          | 9.00E-73 |
| 2558669806 | DRAFT_00474 | pfam02754      | CCG                                                          | 4.20E-15 |
| 2558669806 | DRAFT_00474 | pfam02754      | CCG                                                          | 6.90E-16 |
| 2558669806 | DRAFT_00474 | pfam13183      | Fer4_8                                                       | 1.20E-12 |
| 2558669806 | DRAFT_00474 | Locus_type     | CDS                                                          |          |
| 2558669806 | DRAFT_00474 | Product_name   | Fe-S oxidoreductase                                          |          |
| 2558669806 | DRAFT_00474 | Scaffold       | DRAFT_contig_70_41_len_53364_read_count_885993.6             |          |
| 2558669806 | DRAFT_00474 | Coordinates    | 22292..24367(-)                                              |          |
| 2558669806 | DRAFT_00474 | DNA_length     | 2076bp                                                       |          |
| 2558669806 | DRAFT_00474 | Protein_length | 691aa                                                        |          |
| 2558669806 | DRAFT_00474 | GC             |                                                              | 0.61     |
| 2558669806 | DRAFT_00474 | Transmembrane  | Yes                                                          |          |
| 2558669806 | DRAFT_00474 | Fused_gene     | Yes                                                          |          |
| 2558669807 | DRAFT_00475 | COG_category   | [K] Transcription                                            |          |
| 2558669807 | DRAFT_00475 | COG1293        | Predicted RNA-binding protein homologous to eukaryotic snRNP | 8.00E-58 |
| 2558669807 | DRAFT_00475 | pfam05670      | DUF814                                                       | 7.30E-17 |

|            |             |                |         |                                                              |          |
|------------|-------------|----------------|---------|--------------------------------------------------------------|----------|
| 2558669807 | DRAFT_00475 | pfam05833      | FbpA    |                                                              | 4.70E-30 |
| 2558669807 | DRAFT_00475 | Locus_type     |         | CDS                                                          |          |
| 2558669807 | DRAFT_00475 | Product_name   |         | Predicted RNA-binding protein homologous to eukaryotic snRNP |          |
| 2558669807 | DRAFT_00475 | Scaffold       |         | DRAFT_contig_70_41_len_53364_read_count_885993.6             |          |
| 2558669807 | DRAFT_00475 | Coordinates    |         | 24395..26236(-)                                              |          |
| 2558669807 | DRAFT_00475 | DNA_length     |         | 1842bp                                                       |          |
| 2558669807 | DRAFT_00475 | Protein_length |         | 613aa                                                        |          |
| 2558669807 | DRAFT_00475 | GC             |         |                                                              | 0.61     |
|            |             |                |         |                                                              |          |
| 2558669808 | DRAFT_00476 | Locus_type     |         | CDS                                                          |          |
| 2558669808 | DRAFT_00476 | Product_name   |         | hypothetical protein                                         |          |
| 2558669808 | DRAFT_00476 | Scaffold       |         | DRAFT_contig_70_41_len_53364_read_count_885993.6             |          |
| 2558669808 | DRAFT_00476 | Coordinates    |         | 26244..26522(+)                                              |          |
| 2558669808 | DRAFT_00476 | DNA_length     |         | 279bp                                                        |          |
| 2558669808 | DRAFT_00476 | Protein_length |         | 92aa                                                         |          |
| 2558669808 | DRAFT_00476 | GC             |         |                                                              | 0.53     |
| 2558669808 | DRAFT_00476 | Transmembrane  |         | Yes                                                          |          |
|            |             |                |         |                                                              |          |
| 2558669809 | DRAFT_00477 | Locus_type     |         | CDS                                                          |          |
| 2558669809 | DRAFT_00477 | Product_name   |         | hypothetical protein                                         |          |
| 2558669809 | DRAFT_00477 | Scaffold       |         | DRAFT_contig_70_41_len_53364_read_count_885993.6             |          |
| 2558669809 | DRAFT_00477 | Coordinates    |         | 26503..26835(-)                                              |          |
| 2558669809 | DRAFT_00477 | DNA_length     |         | 333bp                                                        |          |
| 2558669809 | DRAFT_00477 | Protein_length |         | 110aa                                                        |          |
| 2558669809 | DRAFT_00477 | GC             |         |                                                              | 0.56     |
|            |             |                |         |                                                              |          |
| 2558669810 | DRAFT_00478 | pfam12680      | SnoaL_2 |                                                              | 8.90E-10 |
| 2558669810 | DRAFT_00478 | Locus_type     |         | CDS                                                          |          |
| 2558669810 | DRAFT_00478 | Product_name   |         | SnoaL-like domain                                            |          |
| 2558669810 | DRAFT_00478 | Scaffold       |         | DRAFT_contig_70_41_len_53364_read_count_885993.6             |          |
| 2558669810 | DRAFT_00478 | Coordinates    |         | 26961..27311(-)                                              |          |
| 2558669810 | DRAFT_00478 | DNA_length     |         | 351bp                                                        |          |
| 2558669810 | DRAFT_00478 | Protein_length |         | 116aa                                                        |          |
| 2558669810 | DRAFT_00478 | GC             |         |                                                              | 0.43     |

|            |             |                |                                                                         |          |
|------------|-------------|----------------|-------------------------------------------------------------------------|----------|
| 2558669811 | DRAFT_00479 | COG_category   | [L] Replication, recombination and repair                               |          |
| 2558669811 | DRAFT_00479 | COG0468        | RecA/RadA recombinase                                                   | 9.00E-29 |
| 2558669811 | DRAFT_00479 | pfam08423      | Rad51                                                                   | 1.40E-31 |
| 2558669811 | DRAFT_00479 | KO:K04483      | DNA repair protein RadA                                                 | 1.00E-26 |
| 2558669811 | DRAFT_00479 | Locus_type     | CDS                                                                     |          |
| 2558669811 | DRAFT_00479 | Product_name   | RecA/RadA recombinase                                                   |          |
| 2558669811 | DRAFT_00479 | Scaffold       | DRAFT_contig_70_41_len_53364_read_count_885993.6                        |          |
| 2558669811 | DRAFT_00479 | Coordinates    | 27445..28149(-)                                                         |          |
| 2558669811 | DRAFT_00479 | DNA_length     | 705bp                                                                   |          |
| 2558669811 | DRAFT_00479 | Protein_length | 234aa                                                                   |          |
| 2558669811 | DRAFT_00479 | GC             |                                                                         | 0.59     |
| 2558669812 | DRAFT_00480 | COG_category   | [K] Transcription                                                       |          |
| 2558669812 | DRAFT_00480 | COG1958        | Small nuclear ribonucleoprotein (snRNP) homolog                         | 9.00E-10 |
| 2558669812 | DRAFT_00480 | pfam01423      | LSM                                                                     | 2.20E-17 |
| 2558669812 | DRAFT_00480 | KO:K04796      | small nuclear ribonucleoprotein                                         | 1.60E-22 |
| 2558669812 | DRAFT_00480 | Locus_type     | CDS                                                                     |          |
| 2558669812 | DRAFT_00480 | Product_name   | Small nuclear ribonucleoprotein (snRNP) homolog                         |          |
| 2558669812 | DRAFT_00480 | Scaffold       | DRAFT_contig_70_41_len_53364_read_count_885993.6                        |          |
| 2558669812 | DRAFT_00480 | Coordinates    | 28234..28485(+)                                                         |          |
| 2558669812 | DRAFT_00480 | DNA_length     | 252bp                                                                   |          |
| 2558669812 | DRAFT_00480 | Protein_length | 83aa                                                                    |          |
| 2558669812 | DRAFT_00480 | GC             |                                                                         | 0.54     |
| 2558669813 | DRAFT_00481 | COG_category   | [T] Signal transduction mechanisms                                      |          |
| 2558669813 | DRAFT_00481 | COG0478        | RIO-like serine/threonine protein kinase fused to N-terminal HTH domain | 5.00E-55 |
| 2558669813 | DRAFT_00481 | pfam01163      | RIO1                                                                    | 4.70E-38 |
| 2558669813 | DRAFT_00481 | pfam09202      | Rio2_N                                                                  | 3.60E-08 |
| 2558669813 | DRAFT_00481 | EC:2.7.11.1    | Non-specific serine/threonine protein kinase.                           |          |
| 2558669813 | DRAFT_00481 | KO:K07179      | RIO kinase 2 [EC:2.7.11.1]                                              | 0.00E+00 |
| 2558669813 | DRAFT_00481 | Locus_type     | CDS                                                                     |          |
| 2558669813 | DRAFT_00481 | Product_name   | RIO-like serine/threonine protein kinase fused to N-terminal HTH domain |          |
| 2558669813 | DRAFT_00481 | Scaffold       | DRAFT_contig_70_41_len_53364_read_count_885993.6                        |          |



|            |             |                |                                                                  |          |
|------------|-------------|----------------|------------------------------------------------------------------|----------|
| 2558669813 | DRAFT_00481 | Coordinates    | 28677..29564(-)                                                  |          |
| 2558669813 | DRAFT_00481 | DNA_length     | 888bp                                                            |          |
| 2558669813 | DRAFT_00481 | Protein_length | 295aa                                                            |          |
| 2558669813 | DRAFT_00481 | GC             |                                                                  | 0.62     |
| 2558669814 | DRAFT_00482 | COG_category   | [O] Posttranslational modification, protein turnover, chaperones |          |
| 2558669814 | DRAFT_00482 | COG0309        | Hydrogenase maturation factor                                    | 3.00E-58 |
| 2558669814 | DRAFT_00482 | pfam00586      | AIRS                                                             | 1.40E-06 |
| 2558669814 | DRAFT_00482 | pfam02769      | AIRS_C                                                           | 6.00E-19 |
| 2558669814 | DRAFT_00482 | Locus_type     | CDS                                                              |          |
| 2558669814 | DRAFT_00482 | Product_name   | Hydrogenase maturation factor                                    |          |
| 2558669814 | DRAFT_00482 | Scaffold       | DRAFT_contig_70_41_len_53364_read_count_885993.6                 |          |
| 2558669814 | DRAFT_00482 | Coordinates    | 29746..30786(-)                                                  |          |
| 2558669814 | DRAFT_00482 | DNA_length     | 1041bp                                                           |          |
| 2558669814 | DRAFT_00482 | Protein_length | 346aa                                                            |          |
| 2558669814 | DRAFT_00482 | GC             |                                                                  | 0.6      |
| 2558669815 | DRAFT_00483 | pfam07155      | ECF-ribofla_trS                                                  | 3.40E-06 |
| 2558669815 | DRAFT_00483 | Locus_type     | CDS                                                              |          |
| 2558669815 | DRAFT_00483 | Product_name   | ECF-type riboflavin transporter, S component                     |          |
| 2558669815 | DRAFT_00483 | Scaffold       | DRAFT_contig_70_41_len_53364_read_count_885993.6                 |          |
| 2558669815 | DRAFT_00483 | Coordinates    | 30808..31341(-)                                                  |          |
| 2558669815 | DRAFT_00483 | DNA_length     | 534bp                                                            |          |
| 2558669815 | DRAFT_00483 | Protein_length | 177aa                                                            |          |
| 2558669815 | DRAFT_00483 | GC             |                                                                  | 0.61     |
| 2558669815 | DRAFT_00483 | Transmembrane  | Yes                                                              |          |
| 2558669816 | DRAFT_00484 | COG_category   | [S] Function unknown                                             |          |
| 2558669816 | DRAFT_00484 | COG1992        | Uncharacterized conserved protein                                | 1.00E-33 |
| 2558669816 | DRAFT_00484 | pfam10120      | Aldolase_2                                                       | 4.70E-40 |
| 2558669816 | DRAFT_00484 | Locus_type     | CDS                                                              |          |
| 2558669816 | DRAFT_00484 | Product_name   | Uncharacterized conserved protein                                |          |
| 2558669816 | DRAFT_00484 | Scaffold       | DRAFT_contig_70_41_len_53364_read_count_885993.6                 |          |
| 2558669816 | DRAFT_00484 | Coordinates    | 31445..32380(+)                                                  |          |

|            |             |                |                                                                        |           |
|------------|-------------|----------------|------------------------------------------------------------------------|-----------|
| 2558669816 | DRAFT_00484 | DNA_length     | 936bp                                                                  |           |
| 2558669816 | DRAFT_00484 | Protein_length | 311aa                                                                  |           |
| 2558669816 | DRAFT_00484 | GC             |                                                                        | 0.61      |
| 2558669817 | DRAFT_00485 | KEGG_module    | M00052: Pyrimidine ribonucleotide biosynthesis, UMP => UDP/UTP,CDP/CTP |           |
| 2558669817 | DRAFT_00485 | Metacyc        | PWY-7176: UTP and CTP <i>de novo</i> biosynthesis                      |           |
| 2558669817 | DRAFT_00485 | Metacyc        | PWY-7185: UTP and CTP dephosphorylation I                              |           |
| 2558669817 | DRAFT_00485 | Metacyc        | PWY-7177: UTP and CTP dephosphorylation II                             |           |
| 2558669817 | DRAFT_00485 | IMG_pathway    | 324: CTP synthesis                                                     |           |
| 2558669817 | DRAFT_00485 | COG_category   | [F] Nucleotide transport and metabolism                                |           |
| 2558669817 | DRAFT_00485 | COG0504        | CTP synthase (UTP-ammonia lyase)                                       | 0.00E+00  |
| 2558669817 | DRAFT_00485 | pfam06418      | CTP_synth_N                                                            | 5.00E-119 |
| 2558669817 | DRAFT_00485 | pfam00117      | GATase                                                                 | 8.80E-43  |
| 2558669817 | DRAFT_00485 | EC:6.3.4.2     | CTP synthase.                                                          |           |
| 2558669817 | DRAFT_00485 | TIGR00337      | CTP synthase                                                           | 0.00E+00  |
| 2558669817 | DRAFT_00485 | KO:K01937      | CTP synthase [EC:6.3.4.2]                                              | 0.00E+00  |
| 2558669817 | DRAFT_00485 | ITERM:01398    | CTP synthase (EC 6.3.4.2)                                              |           |
| 2558669817 | DRAFT_00485 | Locus_type     | CDS                                                                    |           |
| 2558669817 | DRAFT_00485 | Product_name   | CTP synthase (EC 6.3.4.2)                                              |           |
| 2558669817 | DRAFT_00485 | Scaffold       | DRAFT_contig_70_41_len_53364_read_count_885993.6                       |           |
| 2558669817 | DRAFT_00485 | Coordinates    | 32369..34012(-)                                                        |           |
| 2558669817 | DRAFT_00485 | DNA_length     | 1644bp                                                                 |           |
| 2558669817 | DRAFT_00485 | Protein_length | 547aa                                                                  |           |
| 2558669817 | DRAFT_00485 | GC             |                                                                        | 0.58      |
| 2558669818 | DRAFT_00486 | COG_category   | [P] Inorganic ion transport and metabolism                             |           |
| 2558669818 | DRAFT_00486 | COG0704        | Phosphate uptake regulator                                             | 3.00E-18  |
| 2558669818 | DRAFT_00486 | pfam01895      | PhoU                                                                   | 2.80E-10  |
| 2558669818 | DRAFT_00486 | pfam04014      | Antitoxin-MazE                                                         | 4.00E-06  |
| 2558669818 | DRAFT_00486 | Locus_type     | CDS                                                                    |           |
| 2558669818 | DRAFT_00486 | Product_name   | Phosphate uptake regulator                                             |           |
| 2558669818 | DRAFT_00486 | Scaffold       | DRAFT_contig_70_41_len_53364_read_count_885993.6                       |           |
| 2558669818 | DRAFT_00486 | Coordinates    | 34108..35097(-)                                                        |           |
| 2558669818 | DRAFT_00486 | DNA_length     | 990bp                                                                  |           |

|            |             |                |                                                  |          |
|------------|-------------|----------------|--------------------------------------------------|----------|
| 2558669818 | DRAFT_00486 | Protein_length | 329aa                                            |          |
| 2558669818 | DRAFT_00486 | GC             |                                                  | 0.57     |
| 2558669819 | DRAFT_00487 | Locus_type     | CDS                                              |          |
| 2558669819 | DRAFT_00487 | Product_name   | hypothetical protein                             |          |
| 2558669819 | DRAFT_00487 | Scaffold       | DRAFT_contig_70_41_len_53364_read_count_885993.6 |          |
| 2558669819 | DRAFT_00487 | Coordinates    | 35297..35482(-)                                  |          |
| 2558669819 | DRAFT_00487 | DNA_length     | 186bp                                            |          |
| 2558669819 | DRAFT_00487 | Protein_length | 61aa                                             |          |
| 2558669819 | DRAFT_00487 | GC             |                                                  | 0.56     |
| 2558669820 | DRAFT_00488 | COG_category   | [C] Energy production and conversion             |          |
| 2558669820 | DRAFT_00488 | COG1254        | Acylphosphatases                                 | 2.00E-10 |
| 2558669820 | DRAFT_00488 | pfam00708      | Acylphosphatase                                  | 3.70E-17 |
| 2558669820 | DRAFT_00488 | EC:3.6.1.7     | Acylphosphatase.                                 |          |
| 2558669820 | DRAFT_00488 | KO:K01512      | acylphosphatase [EC:3.6.1.7]                     | 1.50E-13 |
| 2558669820 | DRAFT_00488 | Locus_type     | CDS                                              |          |
| 2558669820 | DRAFT_00488 | Product_name   | Acylphosphatases                                 |          |
| 2558669820 | DRAFT_00488 | Scaffold       | DRAFT_contig_70_41_len_53364_read_count_885993.6 |          |
| 2558669820 | DRAFT_00488 | Coordinates    | 35674..35883(+)                                  |          |
| 2558669820 | DRAFT_00488 | DNA_length     | 210bp                                            |          |
| 2558669820 | DRAFT_00488 | Protein_length | 69aa                                             |          |
| 2558669820 | DRAFT_00488 | GC             |                                                  | 0.62     |
| 2558669821 | DRAFT_00489 | Locus_type     | CDS                                              |          |
| 2558669821 | DRAFT_00489 | Product_name   | hypothetical protein                             |          |
| 2558669821 | DRAFT_00489 | Scaffold       | DRAFT_contig_70_41_len_53364_read_count_885993.6 |          |
| 2558669821 | DRAFT_00489 | Coordinates    | 36140..36670(+)                                  |          |
| 2558669821 | DRAFT_00489 | DNA_length     | 531bp                                            |          |
| 2558669821 | DRAFT_00489 | Protein_length | 176aa                                            |          |
| 2558669821 | DRAFT_00489 | GC             |                                                  | 0.57     |
| 2558669822 | DRAFT_00490 | COG_category   | [G] Carbohydrate transport and metabolism        |          |
| 2558669822 | DRAFT_00490 | COG0524        | Sugar kinases, ribokinase family                 | 2.00E-14 |

|            |             |                |                                                                 |                                                                 |          |
|------------|-------------|----------------|-----------------------------------------------------------------|-----------------------------------------------------------------|----------|
| 2558669822 | DRAFT_00490 | pfam00294      | PfkB                                                            |                                                                 | 3.30E-09 |
| 2558669822 | DRAFT_00490 | Locus_type     |                                                                 | CDS                                                             |          |
| 2558669822 | DRAFT_00490 | Product_name   |                                                                 | Sugar kinases, ribokinase family                                |          |
| 2558669822 | DRAFT_00490 | Scaffold       |                                                                 | DRAFT_contig_70_41_len_53364_read_count_885993.6                |          |
| 2558669822 | DRAFT_00490 | Coordinates    |                                                                 | 36671..37633(-)                                                 |          |
| 2558669822 | DRAFT_00490 | DNA_length     |                                                                 | 963bp                                                           |          |
| 2558669822 | DRAFT_00490 | Protein_length |                                                                 | 320aa                                                           |          |
| 2558669822 | DRAFT_00490 | GC             |                                                                 |                                                                 | 0.59     |
| 2558669823 | DRAFT_00491 | COG_category   | [R] General function prediction only                            |                                                                 |          |
| 2558669823 | DRAFT_00491 | COG0312        | Predicted Zn-dependent proteases and their inactivated homologs |                                                                 | 2.00E-68 |
| 2558669823 | DRAFT_00491 | pfam01523      | PmbA_TldD                                                       |                                                                 | 2.60E-53 |
| 2558669823 | DRAFT_00491 | KO:K03592      | PmbA protein                                                    |                                                                 | 0.00E+00 |
| 2558669823 | DRAFT_00491 | Locus_type     |                                                                 | CDS                                                             |          |
| 2558669823 | DRAFT_00491 | Product_name   |                                                                 | Predicted Zn-dependent proteases and their inactivated homologs |          |
| 2558669823 | DRAFT_00491 | Scaffold       |                                                                 | DRAFT_contig_70_41_len_53364_read_count_885993.6                |          |
| 2558669823 | DRAFT_00491 | Coordinates    |                                                                 | 37782..39113(-)                                                 |          |
| 2558669823 | DRAFT_00491 | DNA_length     |                                                                 | 1332bp                                                          |          |
| 2558669823 | DRAFT_00491 | Protein_length |                                                                 | 443aa                                                           |          |
| 2558669823 | DRAFT_00491 | GC             |                                                                 |                                                                 | 0.59     |
| 2558669824 | DRAFT_00492 | COG_category   | [R] General function prediction only                            |                                                                 |          |
| 2558669824 | DRAFT_00492 | COG0312        | Predicted Zn-dependent proteases and their inactivated homologs |                                                                 | 8.00E-76 |
| 2558669824 | DRAFT_00492 | pfam01523      | PmbA_TldD                                                       |                                                                 | 8.40E-54 |
| 2558669824 | DRAFT_00492 | KO:K03568      | TldD protein                                                    |                                                                 | 0.00E+00 |
| 2558669824 | DRAFT_00492 | Locus_type     |                                                                 | CDS                                                             |          |
| 2558669824 | DRAFT_00492 | Product_name   |                                                                 | Predicted Zn-dependent proteases and their inactivated homologs |          |
| 2558669824 | DRAFT_00492 | Scaffold       |                                                                 | DRAFT_contig_70_41_len_53364_read_count_885993.6                |          |
| 2558669824 | DRAFT_00492 | Coordinates    |                                                                 | 39119..40564(-)                                                 |          |
| 2558669824 | DRAFT_00492 | DNA_length     |                                                                 | 1446bp                                                          |          |
| 2558669824 | DRAFT_00492 | Protein_length |                                                                 | 481aa                                                           |          |
| 2558669824 | DRAFT_00492 | GC             |                                                                 |                                                                 | 0.58     |
| 2558669825 | DRAFT_00493 | COG_category   | [R] General function prediction only                            |                                                                 |          |

|            |             |                |                                                                         |          |
|------------|-------------|----------------|-------------------------------------------------------------------------|----------|
| 2558669825 | DRAFT_00493 | COG0595        | Predicted hydrolase of the metallo-beta-lactamase superfamily           | 2.00E-42 |
| 2558669825 | DRAFT_00493 | pfam07521      | RMMBL                                                                   | 8.30E-06 |
| 2558669825 | DRAFT_00493 | pfam12706      | Lactamase_B_2                                                           | 5.20E-14 |
| 2558669825 | DRAFT_00493 | Locus_type     | CDS                                                                     |          |
| 2558669825 | DRAFT_00493 | Product_name   | Predicted hydrolase of the metallo-beta-lactamase superfamily           |          |
| 2558669825 | DRAFT_00493 | Scaffold       | DRAFT_contig_70_41_len_53364_read_count_885993.6                        |          |
| 2558669825 | DRAFT_00493 | Coordinates    | 40663..42033(-)                                                         |          |
| 2558669825 | DRAFT_00493 | DNA_length     | 1371bp                                                                  |          |
| 2558669825 | DRAFT_00493 | Protein_length | 456aa                                                                   |          |
| 2558669825 | DRAFT_00493 | GC             |                                                                         | 0.59     |
| 2558669826 | DRAFT_00494 | Locus_type     | CDS                                                                     |          |
| 2558669826 | DRAFT_00494 | Product_name   | hypothetical protein                                                    |          |
| 2558669826 | DRAFT_00494 | Scaffold       | DRAFT_contig_70_41_len_53364_read_count_885993.6                        |          |
| 2558669826 | DRAFT_00494 | Coordinates    | 42144..42269(+)                                                         |          |
| 2558669826 | DRAFT_00494 | DNA_length     | 126bp                                                                   |          |
| 2558669826 | DRAFT_00494 | Protein_length | 41aa                                                                    |          |
| 2558669826 | DRAFT_00494 | GC             |                                                                         | 0.52     |
| 2558669826 | DRAFT_00494 | Transmembrane  | Yes                                                                     |          |
| 2558669827 | DRAFT_00495 | KEGG_module    | M00532: Photorespiration                                                |          |
| 2558669827 | DRAFT_00495 | Metacyc        | PWY-181: photorespiration                                               |          |
| 2558669827 | DRAFT_00495 | COG_category   | [R] General function prediction only                                    |          |
| 2558669827 | DRAFT_00495 | COG0546        | Predicted phosphatases                                                  | 8.00E-31 |
| 2558669827 | DRAFT_00495 | pfam13419      | HAD_2                                                                   | 2.00E-30 |
| 2558669827 | DRAFT_00495 | EC:3.1.3.18    | Phosphoglycolate phosphatase.                                           |          |
| 2558669827 | DRAFT_00495 | TIGR01549      | haloacid dehalogenase superfamily, subfamily IA, variant 1 with third n | 8.40E-14 |
| 2558669827 | DRAFT_00495 | TIGR01428      | 2-haloalkanoic acid dehalogenase, type II                               | 4.80E-24 |
| 2558669827 | DRAFT_00495 | TIGR01509      | haloacid dehalogenase superfamily, subfamily IA, variant 3 with third n | 3.10E-12 |
| 2558669827 | DRAFT_00495 | TIGR01493      | Haloacid dehalogenase superfamily, subfamily IA, variant 2 with 3rd m   | 1.10E-09 |
| 2558669827 | DRAFT_00495 | KO:K01091      | phosphoglycolate phosphatase [EC:3.1.3.18]                              | 4.20E-21 |
| 2558669827 | DRAFT_00495 | Locus_type     | CDS                                                                     |          |
| 2558669827 | DRAFT_00495 | Product_name   | haloacid dehalogenase superfamily, subfamily IA, variant 3 with third   |          |
| 2558669827 | DRAFT_00495 | Scaffold       | DRAFT_contig_70_41_len_53364_read_count_885993.6                        |          |

|            |             |                |                                                  |          |
|------------|-------------|----------------|--------------------------------------------------|----------|
| 2558669827 | DRAFT_00495 | Coordinates    | 42273..42938(+)                                  |          |
| 2558669827 | DRAFT_00495 | DNA_length     | 666bp                                            |          |
| 2558669827 | DRAFT_00495 | Protein_length | 221aa                                            |          |
| 2558669827 | DRAFT_00495 | GC             |                                                  | 0.59     |
|            |             |                |                                                  |          |
| 2558669828 | DRAFT_00496 | Locus_type     | CDS                                              |          |
| 2558669828 | DRAFT_00496 | Product_name   | hypothetical protein                             |          |
| 2558669828 | DRAFT_00496 | Scaffold       | DRAFT_contig_70_41_len_53364_read_count_885993.6 |          |
| 2558669828 | DRAFT_00496 | Coordinates    | 43127..43489(+)                                  |          |
| 2558669828 | DRAFT_00496 | DNA_length     | 363bp                                            |          |
| 2558669828 | DRAFT_00496 | Protein_length | 120aa                                            |          |
| 2558669828 | DRAFT_00496 | GC             |                                                  | 0.57     |
|            |             |                |                                                  |          |
| 2558669829 | DRAFT_00497 | Metacyc        | PWY-7112: 4-hydroxy-2-nonenal detoxification     |          |
| 2558669829 | DRAFT_00497 | Metacyc        | PWY-6842: glutathione-mediated detoxification II |          |
| 2558669829 | DRAFT_00497 | Metacyc        | PWY-4061: glutathione-mediated detoxification I  |          |
| 2558669829 | DRAFT_00497 | COG_category   | [E] Amino acid transport and metabolism          |          |
| 2558669829 | DRAFT_00497 | COG0308        | Aminopeptidase N                                 | 5.00E-87 |
| 2558669829 | DRAFT_00497 | pfam13646      | HEAT_2                                           | 1.20E-10 |
| 2558669829 | DRAFT_00497 | pfam01433      | Peptidase_M1                                     | 5.70E-68 |
| 2558669829 | DRAFT_00497 | EC:3.4.11.2    | Membrane alanyl aminopeptidase.                  |          |
| 2558669829 | DRAFT_00497 | KO:K01256      | aminopeptidase N [EC:3.4.11.2]                   | 0.00E+00 |
| 2558669829 | DRAFT_00497 | Locus_type     | CDS                                              |          |
| 2558669829 | DRAFT_00497 | Product_name   | Aminopeptidase N                                 |          |
| 2558669829 | DRAFT_00497 | Scaffold       | DRAFT_contig_70_41_len_53364_read_count_885993.6 |          |
| 2558669829 | DRAFT_00497 | Coordinates    | 43518..46001(-)                                  |          |
| 2558669829 | DRAFT_00497 | DNA_length     | 2484bp                                           |          |
| 2558669829 | DRAFT_00497 | Protein_length | 827aa                                            |          |
| 2558669829 | DRAFT_00497 | GC             |                                                  | 0.57     |
|            |             |                |                                                  |          |
| 2558669830 | DRAFT_00498 | Locus_type     | CDS                                              |          |
| 2558669830 | DRAFT_00498 | Product_name   | hypothetical protein                             |          |
| 2558669830 | DRAFT_00498 | Scaffold       | DRAFT_contig_70_41_len_53364_read_count_885993.6 |          |
| 2558669830 | DRAFT_00498 | Coordinates    | 46081..46254(+)                                  |          |

|            |             |                |                                                                        |          |
|------------|-------------|----------------|------------------------------------------------------------------------|----------|
| 2558669830 | DRAFT_00498 | DNA_length     | 174bp                                                                  |          |
| 2558669830 | DRAFT_00498 | Protein_length | 57aa                                                                   |          |
| 2558669830 | DRAFT_00498 | GC             |                                                                        | 0.64     |
| 2558669831 | DRAFT_00499 | KEGG_module    | M00048: Inosine monophosphate biosynthesis, PRPP + glutamine => IMP    |          |
| 2558669831 | DRAFT_00499 | Metacyc        | PWY-6121: 5-aminoimidazole ribonucleotide biosynthesis I               |          |
| 2558669831 | DRAFT_00499 | Metacyc        | PWY-6277: superpathway of 5-aminoimidazole ribonucleotide biosynthesis |          |
| 2558669831 | DRAFT_00499 | Metacyc        | PWY-6122: 5-aminoimidazole ribonucleotide biosynthesis II              |          |
| 2558669831 | DRAFT_00499 | COG_category   | [F] Nucleotide transport and metabolism                                |          |
| 2558669831 | DRAFT_00499 | COG0151        | Phosphoribosylamine-glycine ligase                                     | 7.00E-27 |
| 2558669831 | DRAFT_00499 | pfam01071      | GARS_A                                                                 | 9.40E-09 |
| 2558669831 | DRAFT_00499 | pfam02843      | GARS_C                                                                 | 9.20E-11 |
| 2558669831 | DRAFT_00499 | EC:6.3.4.13    | Phosphoribosylamine--glycine ligase.                                   |          |
| 2558669831 | DRAFT_00499 | KO:K01945      | phosphoribosylamine--glycine ligase [EC:6.3.4.13]                      | 0.00E+00 |
| 2558669831 | DRAFT_00499 | Locus_type     | CDS                                                                    |          |
| 2558669831 | DRAFT_00499 | Product_name   | Phosphoribosylamine-glycine ligase                                     |          |
| 2558669831 | DRAFT_00499 | Scaffold       | DRAFT_contig_70_41_len_53364_read_count_885993.6                       |          |
| 2558669831 | DRAFT_00499 | Coordinates    | 46251..47579(-)                                                        |          |
| 2558669831 | DRAFT_00499 | DNA_length     | 1329bp                                                                 |          |
| 2558669831 | DRAFT_00499 | Protein_length | 442aa                                                                  |          |
| 2558669831 | DRAFT_00499 | GC             |                                                                        | 0.55     |
| 2558669832 | DRAFT_00500 | Locus_type     | CDS                                                                    |          |
| 2558669832 | DRAFT_00500 | Product_name   | hypothetical protein                                                   |          |
| 2558669832 | DRAFT_00500 | Scaffold       | DRAFT_contig_70_41_len_53364_read_count_885993.6                       |          |
| 2558669832 | DRAFT_00500 | Coordinates    | 47994..48248(+)                                                        |          |
| 2558669832 | DRAFT_00500 | DNA_length     | 255bp                                                                  |          |
| 2558669832 | DRAFT_00500 | Protein_length | 84aa                                                                   |          |
| 2558669832 | DRAFT_00500 | GC             |                                                                        | 0.54     |
| 2558669832 | DRAFT_00500 | Transmembrane  | Yes                                                                    |          |
| 2558669833 | DRAFT_00501 | pfam08448      | PAS_4                                                                  | 4.80E-07 |
| 2558669833 | DRAFT_00501 | Locus_type     | CDS                                                                    |          |
| 2558669833 | DRAFT_00501 | Product_name   | Uncharacterized conserved protein                                      |          |

|            |             |                |                                                     |          |
|------------|-------------|----------------|-----------------------------------------------------|----------|
| 2558669833 | DRAFT_00501 | Scaffold       | DRAFT_contig_70_41_len_53364_read_count_885993.6    |          |
| 2558669833 | DRAFT_00501 | Coordinates    | 48362..48712(-)                                     |          |
| 2558669833 | DRAFT_00501 | DNA_length     | 351bp                                               |          |
| 2558669833 | DRAFT_00501 | Protein_length | 116aa                                               |          |
| 2558669833 | DRAFT_00501 | GC             |                                                     | 0.53     |
|            |             |                |                                                     |          |
| 2558669834 | DRAFT_00502 | Locus_type     | CDS                                                 |          |
| 2558669834 | DRAFT_00502 | Product_name   | hypothetical protein                                |          |
| 2558669834 | DRAFT_00502 | Scaffold       | DRAFT_contig_70_41_len_53364_read_count_885993.6    |          |
| 2558669834 | DRAFT_00502 | Coordinates    | 48997..49263(+)                                     |          |
| 2558669834 | DRAFT_00502 | DNA_length     | 267bp                                               |          |
| 2558669834 | DRAFT_00502 | Protein_length | 88aa                                                |          |
| 2558669834 | DRAFT_00502 | GC             |                                                     | 0.51     |
| 2558669834 | DRAFT_00502 | Transmembrane  | Yes                                                 |          |
|            |             |                |                                                     |          |
| 2558669835 | DRAFT_00503 | KEGG_module    | M00359: Aminoacyl-tRNA biosynthesis, eukaryotes     |          |
| 2558669835 | DRAFT_00503 | KEGG_module    | M00360: Aminoacyl-tRNA biosynthesis, prokaryotes    |          |
| 2558669835 | DRAFT_00503 | Metacyc        | TRNA-CHARGING-PWY: tRNA charging                    |          |
| 2558669835 | DRAFT_00503 | COG_category   | [J] Translation, ribosomal structure and biogenesis |          |
| 2558669835 | DRAFT_00503 | COG0018        | Arginyl-tRNA synthetase                             | 4.00E-92 |
| 2558669835 | DRAFT_00503 | pfam05746      | DALR_1                                              | 8.10E-23 |
| 2558669835 | DRAFT_00503 | pfam00750      | tRNA-synt_1d                                        | 8.00E-23 |
| 2558669835 | DRAFT_00503 | pfam03485      | Arg_tRNA_synt_N                                     | 6.50E-09 |
| 2558669835 | DRAFT_00503 | EC:6.1.1.19    | Arginine--tRNA ligase.                              |          |
| 2558669835 | DRAFT_00503 | KO:K01887      | arginyl-tRNA synthetase [EC:6.1.1.19]               | 0.00E+00 |
| 2558669835 | DRAFT_00503 | Locus_type     | CDS                                                 |          |
| 2558669835 | DRAFT_00503 | Product_name   | Arginyl-tRNA synthetase                             |          |
| 2558669835 | DRAFT_00503 | Scaffold       | DRAFT_contig_70_41_len_53364_read_count_885993.6    |          |
| 2558669835 | DRAFT_00503 | Coordinates    | 49365..51266(+)                                     |          |
| 2558669835 | DRAFT_00503 | DNA_length     | 1902bp                                              |          |
| 2558669835 | DRAFT_00503 | Protein_length | 633aa                                               |          |
| 2558669835 | DRAFT_00503 | GC             |                                                     | 0.59     |
|            |             |                |                                                     |          |
| 2558669836 | DRAFT_00504 | KEGG_module    | M00020: Serine biosynthesis, glycerate-3P => serine |          |



|            |             |                |                                                                                                                                         |          |
|------------|-------------|----------------|-----------------------------------------------------------------------------------------------------------------------------------------|----------|
| 2558669836 | DRAFT_00504 | Metacyc        | SERSYN-PWY: serine biosynthesis                                                                                                         |          |
| 2558669836 | DRAFT_00504 | COG_category   | [E] Amino acid transport and metabolism                                                                                                 |          |
| 2558669836 | DRAFT_00504 | COG0560        | Phosphoserine phosphatase                                                                                                               | 4.00E-23 |
| 2558669836 | DRAFT_00504 | pfam12710      | HAD                                                                                                                                     | 4.20E-14 |
| 2558669836 | DRAFT_00504 | EC:3.1.3.3     | Phosphoserine phosphatase.                                                                                                              |          |
| 2558669836 | DRAFT_00504 | TIGR01488      | Haloacid Dehalogenase superfamily, subfamily IB, phosphoserine phosphatase                                                              | 1.10E-29 |
| 2558669836 | DRAFT_00504 | TIGR01491      | HAD-superfamily, subfamily-IB PSPase-like hydrolase, archaeal                                                                           | 5.80E-48 |
| 2558669836 | DRAFT_00504 | KO:K01079      | phosphoserine phosphatase [EC:3.1.3.3]                                                                                                  | 1.10E-24 |
| 2558669836 | DRAFT_00504 | Locus_type     | CDS                                                                                                                                     |          |
| 2558669836 | DRAFT_00504 | Product_name   | Haloacid Dehalogenase superfamily, subfamily IB, phosphoserine phosphatase                                                              |          |
| 2558669836 | DRAFT_00504 | Scaffold       | DRAFT_contig_70_41_len_53364_read_count_885993.6                                                                                        |          |
| 2558669836 | DRAFT_00504 | Coordinates    | 51429..52067(+)                                                                                                                         |          |
| 2558669836 | DRAFT_00504 | DNA_length     | 639bp                                                                                                                                   |          |
| 2558669836 | DRAFT_00504 | Protein_length | 212aa                                                                                                                                   |          |
| 2558669836 | DRAFT_00504 | GC             |                                                                                                                                         | 0.57     |
| 2558669837 | DRAFT_00505 | KEGG_module    | M00532: Photorespiration                                                                                                                |          |
| 2558669837 | DRAFT_00505 | KEGG_module    | M00346: Formaldehyde assimilation, serine pathway                                                                                       |          |
| 2558669837 | DRAFT_00505 | Metacyc        | PWY-181: photorespiration                                                                                                               |          |
| 2558669837 | DRAFT_00505 | Metacyc        | PWY-1622: formaldehyde assimilation I (serine pathway)                                                                                  |          |
| 2558669837 | DRAFT_00505 | Metacyc        | GLYSYN-ALA-PWY: glycine biosynthesis III                                                                                                |          |
| 2558669837 | DRAFT_00505 | COG_category   | [E] Amino acid transport and metabolism                                                                                                 |          |
| 2558669837 | DRAFT_00505 | COG0075        | Serine-pyruvate aminotransferase/archaeal aspartate aminotransferase                                                                    | 9.00E-90 |
| 2558669837 | DRAFT_00505 | pfam00266      | Aminotran_5                                                                                                                             | 5.10E-32 |
| 2558669837 | DRAFT_00505 | EC:2.6.1.51    | Serine--pyruvate transaminase.                                                                                                          |          |
| 2558669837 | DRAFT_00505 | EC:2.6.1.44    | Alanine--glyoxylate transaminase.                                                                                                       |          |
| 2558669837 | DRAFT_00505 | EC:2.6.1.45    | Serine--glyoxylate transaminase.                                                                                                        |          |
| 2558669837 | DRAFT_00505 | KO:K00830      | alanine-glyoxylate transaminase / serine-glyoxylate transaminase / serine-pyruvate aminotransferase/archaeal aspartate aminotransferase | 0.00E+00 |
| 2558669837 | DRAFT_00505 | Locus_type     | CDS                                                                                                                                     |          |
| 2558669837 | DRAFT_00505 | Product_name   | Serine-pyruvate aminotransferase/archaeal aspartate aminotransferase                                                                    |          |
| 2558669837 | DRAFT_00505 | Scaffold       | DRAFT_contig_70_41_len_53364_read_count_885993.6                                                                                        |          |
| 2558669837 | DRAFT_00505 | Coordinates    | 52114..53241(+)                                                                                                                         |          |
| 2558669837 | DRAFT_00505 | DNA_length     | 1128bp                                                                                                                                  |          |
| 2558669837 | DRAFT_00505 | Protein_length | 375aa                                                                                                                                   |          |

|            |             |                |                                                                   |          |
|------------|-------------|----------------|-------------------------------------------------------------------|----------|
| 2558669837 | DRAFT_00505 | GC             |                                                                   | 0.59     |
| 2558669838 | DRAFT_00506 | Locus_type     | tRNA                                                              |          |
| 2558669838 | DRAFT_00506 | Product_name   | tRNA_Gln_CTG                                                      |          |
| 2558669838 | DRAFT_00506 | Scaffold       | DRAFT_contig_70_41_len_53364_read_count_885993.6                  |          |
| 2558669838 | DRAFT_00506 | Coordinates    | 53291..53363(+)                                                   |          |
| 2558669838 | DRAFT_00506 | DNA_length     | 73bp                                                              |          |
| 2558669838 | DRAFT_00506 | GC             |                                                                   | 0.62     |
| 2558669839 | DRAFT_00507 | KEGG_module    | M00144: NADH:quinone oxidoreductase, prokaryotes                  |          |
| 2558669839 | DRAFT_00507 | Metacyc        | PWY-4302: aerobic respiration (alternative oxidase pathway)       |          |
| 2558669839 | DRAFT_00507 | Metacyc        | PWY-6692: Fe(II) oxidation                                        |          |
| 2558669839 | DRAFT_00507 | Metacyc        | PWY0-1335: NADH to cytochrome <i>bo</i> oxidase electron transfer |          |
| 2558669839 | DRAFT_00507 | Metacyc        | PWY-5083: NAD/NADH phosphorylation and dephosphorylation          |          |
| 2558669839 | DRAFT_00507 | Metacyc        | PWY0-1334: NADH to cytochrome <i>bd</i> oxidase electron transfer |          |
| 2558669839 | DRAFT_00507 | Metacyc        | PWY-3781: aerobic respiration (cytochrome c)                      |          |
| 2558669839 | DRAFT_00507 | COG_category   | [C] Energy production and conversion                              |          |
| 2558669839 | DRAFT_00507 | COG0852        | NADH:ubiquinone oxidoreductase 27 kD subunit                      | 1.00E-14 |
| 2558669839 | DRAFT_00507 | pfam00329      | Complex1_30kDa                                                    | 1.70E-20 |
| 2558669839 | DRAFT_00507 | EC:1.6.5.3     | NADH:ubiquinone reductase (H(+)-translocating).                   |          |
| 2558669839 | DRAFT_00507 | KO:K00332      | NADH-quinone oxidoreductase subunit C [EC:1.6.5.3]                | 5.10E-16 |
| 2558669839 | DRAFT_00507 | ITERM:05529    | NADH dehydrogenase subunit C (EC 1.6.5.3)                         |          |
| 2558669839 | DRAFT_00507 | Locus_type     | CDS                                                               |          |
| 2558669839 | DRAFT_00507 | Product_name   | NADH dehydrogenase subunit C (EC 1.6.5.3)                         |          |
| 2558669839 | DRAFT_00507 | Scaffold       | DRAFT_contig_70_42_len_53196_read_count_896652.7                  |          |
| 2558669839 | DRAFT_00507 | Coordinates    | 82..525(+)                                                        |          |
| 2558669839 | DRAFT_00507 | DNA_length     | 444bp                                                             |          |
| 2558669839 | DRAFT_00507 | Protein_length | 147aa                                                             |          |
| 2558669839 | DRAFT_00507 | GC             |                                                                   | 0.59     |
| 2558669840 | DRAFT_00508 | Metacyc        | PWY0-1335: NADH to cytochrome <i>bo</i> oxidase electron transfer |          |
| 2558669840 | DRAFT_00508 | Metacyc        | PWY-4302: aerobic respiration (alternative oxidase pathway)       |          |
| 2558669840 | DRAFT_00508 | Metacyc        | PWY0-1334: NADH to cytochrome <i>bd</i> oxidase electron transfer |          |
| 2558669840 | DRAFT_00508 | Metacyc        | PWY-6692: Fe(II) oxidation                                        |          |

|            |             |                |                                                                   |          |
|------------|-------------|----------------|-------------------------------------------------------------------|----------|
| 2558669840 | DRAFT_00508 | Metacyc        | PWY-3781: aerobic respiration (cytochrome c)                      |          |
| 2558669840 | DRAFT_00508 | Metacyc        | PWY-5083: NAD/NADH phosphorylation and dephosphorylation          |          |
| 2558669840 | DRAFT_00508 | COG_category   | [C] Energy production and conversion                              |          |
| 2558669840 | DRAFT_00508 | COG3261        | Ni,Fe-hydrogenase III large subunit                               | 8.00E-98 |
| 2558669840 | DRAFT_00508 | pfam00346      | Complex1_49kDa                                                    | 1.80E-31 |
| 2558669840 | DRAFT_00508 | pfam00374      | NiFeSe_Hases                                                      | 3.10E-09 |
| 2558669840 | DRAFT_00508 | pfam00346      | Complex1_49kDa                                                    | 3.90E-12 |
| 2558669840 | DRAFT_00508 | EC:1.6.5.3     | NADH:ubiquinone reductase (H(+)-translocating).                   |          |
| 2558669840 | DRAFT_00508 | KO:K00329      | NADH dehydrogenase [EC:1.6.5.3]                                   | 0.00E+00 |
| 2558669840 | DRAFT_00508 | Locus_type     | CDS                                                               |          |
| 2558669840 | DRAFT_00508 | Product_name   | Ni,Fe-hydrogenase III large subunit                               |          |
| 2558669840 | DRAFT_00508 | Scaffold       | DRAFT_contig_70_42_len_53196_read_count_896652.7                  |          |
| 2558669840 | DRAFT_00508 | Coordinates    | 518..1756(+)                                                      |          |
| 2558669840 | DRAFT_00508 | DNA_length     | 1239bp                                                            |          |
| 2558669840 | DRAFT_00508 | Protein_length | 412aa                                                             |          |
| 2558669840 | DRAFT_00508 | GC             |                                                                   | 0.58     |
| 2558669841 | DRAFT_00509 | KEGG_module    | M00144: NADH:quinone oxidoreductase, prokaryotes                  |          |
| 2558669841 | DRAFT_00509 | Metacyc        | PWY-6692: Fe(II) oxidation                                        |          |
| 2558669841 | DRAFT_00509 | Metacyc        | PWY-5083: NAD/NADH phosphorylation and dephosphorylation          |          |
| 2558669841 | DRAFT_00509 | Metacyc        | PWY-4302: aerobic respiration (alternative oxidase pathway)       |          |
| 2558669841 | DRAFT_00509 | Metacyc        | PWY0-1334: NADH to cytochrome <i>bd</i> oxidase electron transfer |          |
| 2558669841 | DRAFT_00509 | Metacyc        | PWY-3781: aerobic respiration (cytochrome c)                      |          |
| 2558669841 | DRAFT_00509 | Metacyc        | PWY0-1335: NADH to cytochrome <i>bo</i> oxidase electron transfer |          |
| 2558669841 | DRAFT_00509 | COG_category   | [C] Energy production and conversion                              |          |
| 2558669841 | DRAFT_00509 | COG1005        | NADH:ubiquinone oxidoreductase subunit 1 (chain H)                | 9.00E-49 |
| 2558669841 | DRAFT_00509 | pfam00146      | NADHdh                                                            | 2.70E-59 |
| 2558669841 | DRAFT_00509 | EC:1.6.5.3     | NADH:ubiquinone reductase (H(+)-translocating).                   |          |
| 2558669841 | DRAFT_00509 | KO:K00337      | NADH-quinone oxidoreductase subunit H [EC:1.6.5.3]                | 0.00E+00 |
| 2558669841 | DRAFT_00509 | ITERM:05535    | NADH dehydrogenase subunit H (EC 1.6.5.3)                         |          |
| 2558669841 | DRAFT_00509 | Locus_type     | CDS                                                               |          |
| 2558669841 | DRAFT_00509 | Product_name   | NADH dehydrogenase subunit H (EC 1.6.5.3)                         |          |
| 2558669841 | DRAFT_00509 | Scaffold       | DRAFT_contig_70_42_len_53196_read_count_896652.7                  |          |
| 2558669841 | DRAFT_00509 | Coordinates    | 1762..2727(+)                                                     |          |

|            |             |                |                                                           |                                                                  |          |
|------------|-------------|----------------|-----------------------------------------------------------|------------------------------------------------------------------|----------|
| 2558669841 | DRAFT_00509 | DNA_length     |                                                           | 966bp                                                            |          |
| 2558669841 | DRAFT_00509 | Protein_length |                                                           | 321aa                                                            |          |
| 2558669841 | DRAFT_00509 | GC             |                                                           |                                                                  | 0.58     |
| 2558669841 | DRAFT_00509 | Transmembrane  |                                                           | Yes                                                              |          |
| 2558669842 | DRAFT_00510 | pfam12838      | Fer4_7                                                    |                                                                  | 3.80E-12 |
| 2558669842 | DRAFT_00510 | Locus_type     |                                                           | CDS                                                              |          |
| 2558669842 | DRAFT_00510 | Product_name   |                                                           | Formate hydrogenlyase subunit 6/NADH:ubiquinone oxidoreductase : |          |
| 2558669842 | DRAFT_00510 | Scaffold       |                                                           | DRAFT_contig_70_42_len_53196_read_count_896652.7                 |          |
| 2558669842 | DRAFT_00510 | Coordinates    |                                                           | 2769..3128(+)                                                    |          |
| 2558669842 | DRAFT_00510 | DNA_length     |                                                           | 360bp                                                            |          |
| 2558669842 | DRAFT_00510 | Protein_length |                                                           | 119aa                                                            |          |
| 2558669842 | DRAFT_00510 | GC             |                                                           |                                                                  | 0.52     |
| 2558669843 | DRAFT_00511 | pfam00499      | Oxidored_q3                                               |                                                                  | 2.50E-07 |
| 2558669843 | DRAFT_00511 | Locus_type     |                                                           | CDS                                                              |          |
| 2558669843 | DRAFT_00511 | Product_name   |                                                           | NADH-ubiquinone/plastoquinone oxidoreductase chain 6             |          |
| 2558669843 | DRAFT_00511 | Scaffold       |                                                           | DRAFT_contig_70_42_len_53196_read_count_896652.7                 |          |
| 2558669843 | DRAFT_00511 | Coordinates    |                                                           | 3118..3600(+)                                                    |          |
| 2558669843 | DRAFT_00511 | DNA_length     |                                                           | 483bp                                                            |          |
| 2558669843 | DRAFT_00511 | Protein_length |                                                           | 160aa                                                            |          |
| 2558669843 | DRAFT_00511 | GC             |                                                           |                                                                  | 0.55     |
| 2558669843 | DRAFT_00511 | Transmembrane  |                                                           | Yes                                                              |          |
| 2558669844 | DRAFT_00512 | COG_category   | [C] Energy production and conversion                      |                                                                  |          |
| 2558669844 | DRAFT_00512 | COG0713        | NADH:ubiquinone oxidoreductase subunit 11 or 4L (chain K) |                                                                  | 4.00E-06 |
| 2558669844 | DRAFT_00512 | pfam00420      | Oxidored_q2                                               |                                                                  | 3.40E-16 |
| 2558669844 | DRAFT_00512 | KO:K05567      | multicomponent Na+:H+ antiporter subunit C                |                                                                  | 1.40E-10 |
| 2558669844 | DRAFT_00512 | Locus_type     |                                                           | CDS                                                              |          |
| 2558669844 | DRAFT_00512 | Product_name   |                                                           | NADH:ubiquinone oxidoreductase subunit 11 or 4L (chain K)        |          |
| 2558669844 | DRAFT_00512 | Scaffold       |                                                           | DRAFT_contig_70_42_len_53196_read_count_896652.7                 |          |
| 2558669844 | DRAFT_00512 | Coordinates    |                                                           | 3601..3927(+)                                                    |          |
| 2558669844 | DRAFT_00512 | DNA_length     |                                                           | 327bp                                                            |          |
| 2558669844 | DRAFT_00512 | Protein_length |                                                           | 108aa                                                            |          |

|            |             |                |                                                                     |          |
|------------|-------------|----------------|---------------------------------------------------------------------|----------|
| 2558669844 | DRAFT_00512 | GC             |                                                                     | 0.57     |
| 2558669844 | DRAFT_00512 | Transmembrane  | Yes                                                                 |          |
| 2558669845 | DRAFT_00513 | KEGG_module    | M00144: NADH:quinone oxidoreductase, prokaryotes                    |          |
| 2558669845 | DRAFT_00513 | Metacyc        | PWY0-1335: NADH to cytochrome <i>bo</i> oxidase electron transfer   |          |
| 2558669845 | DRAFT_00513 | Metacyc        | PWY-4302: aerobic respiration (alternative oxidase pathway)         |          |
| 2558669845 | DRAFT_00513 | Metacyc        | PWY-6692: Fe(II) oxidation                                          |          |
| 2558669845 | DRAFT_00513 | Metacyc        | PWY-5083: NAD/NADH phosphorylation and dephosphorylation            |          |
| 2558669845 | DRAFT_00513 | Metacyc        | PWY-3781: aerobic respiration (cytochrome c)                        |          |
| 2558669845 | DRAFT_00513 | Metacyc        | PWY0-1334: NADH to cytochrome <i>bd</i> oxidase electron transfer   |          |
| 2558669845 | DRAFT_00513 | COG_category   | [C] Energy production and conversion                                |          |
| 2558669845 | DRAFT_00513 | COG_category   | [P] Inorganic ion transport and metabolism                          |          |
| 2558669845 | DRAFT_00513 | COG1009        | NADH:ubiquinone oxidoreductase subunit 5 (chain L)/Multisubunit Na+ | 6.00E-99 |
| 2558669845 | DRAFT_00513 | pfam00361      | Oxidored_q1                                                         | 2.60E-77 |
| 2558669845 | DRAFT_00513 | EC:1.6.5.3     | NADH:ubiquinone reductase (H(+)-translocating).                     |          |
| 2558669845 | DRAFT_00513 | TIGR01974      | proton-translocating NADH-quinone oxidoreductase, chain L           | 0.00E+00 |
| 2558669845 | DRAFT_00513 | KO:K00341      | NADH-quinone oxidoreductase subunit L [EC:1.6.5.3]                  | 0.00E+00 |
| 2558669845 | DRAFT_00513 | Locus_type     | CDS                                                                 |          |
| 2558669845 | DRAFT_00513 | Product_name   | proton-translocating NADH-quinone oxidoreductase, chain L           |          |
| 2558669845 | DRAFT_00513 | Scaffold       | DRAFT_contig_70_42_len_53196_read_count_896652.7                    |          |
| 2558669845 | DRAFT_00513 | Coordinates    | 3927..5708(+)                                                       |          |
| 2558669845 | DRAFT_00513 | DNA_length     | 1782bp                                                              |          |
| 2558669845 | DRAFT_00513 | Protein_length | 593aa                                                               |          |
| 2558669845 | DRAFT_00513 | GC             |                                                                     | 0.6      |
| 2558669845 | DRAFT_00513 | Transmembrane  | Yes                                                                 |          |
| 2558669846 | DRAFT_00514 | COG_category   | [C] Energy production and conversion                                |          |
| 2558669846 | DRAFT_00514 | COG1007        | NADH:ubiquinone oxidoreductase subunit 2 (chain N)                  | 5.00E-47 |
| 2558669846 | DRAFT_00514 | pfam00361      | Oxidored_q1                                                         | 4.90E-46 |
| 2558669846 | DRAFT_00514 | TIGR01770      | proton-translocating NADH-quinone oxidoreductase, chain N           | 2.80E-66 |
| 2558669846 | DRAFT_00514 | KO:K05568      | multicomponent Na+:H+ antiporter subunit D                          | 0.00E+00 |
| 2558669846 | DRAFT_00514 | Locus_type     | CDS                                                                 |          |
| 2558669846 | DRAFT_00514 | Product_name   | NADH:ubiquinone oxidoreductase subunit 2 (chain N)                  |          |
| 2558669846 | DRAFT_00514 | Scaffold       | DRAFT_contig_70_42_len_53196_read_count_896652.7                    |          |

|            |             |                |                                           |                                                  |          |
|------------|-------------|----------------|-------------------------------------------|--------------------------------------------------|----------|
| 2558669846 | DRAFT_00514 | Coordinates    |                                           | 5712..7160(+)                                    |          |
| 2558669846 | DRAFT_00514 | DNA_length     |                                           | 1449bp                                           |          |
| 2558669846 | DRAFT_00514 | Protein_length |                                           | 482aa                                            |          |
| 2558669846 | DRAFT_00514 | GC             |                                           |                                                  | 0.59     |
| 2558669846 | DRAFT_00514 | Transmembrane  |                                           | Yes                                              |          |
|            |             |                |                                           |                                                  |          |
| 2558669847 | DRAFT_00515 | Locus_type     |                                           | CDS                                              |          |
| 2558669847 | DRAFT_00515 | Product_name   |                                           | hypothetical protein                             |          |
| 2558669847 | DRAFT_00515 | Scaffold       |                                           | DRAFT_contig_70_42_len_53196_read_count_896652.7 |          |
| 2558669847 | DRAFT_00515 | Coordinates    |                                           | 7211..7528(+)                                    |          |
| 2558669847 | DRAFT_00515 | DNA_length     |                                           | 318bp                                            |          |
| 2558669847 | DRAFT_00515 | Protein_length |                                           | 105aa                                            |          |
| 2558669847 | DRAFT_00515 | GC             |                                           |                                                  | 0.58     |
|            |             |                |                                           |                                                  |          |
| 2558669848 | DRAFT_00516 | Locus_type     |                                           | CDS                                              |          |
| 2558669848 | DRAFT_00516 | Product_name   |                                           | hypothetical protein                             |          |
| 2558669848 | DRAFT_00516 | Scaffold       |                                           | DRAFT_contig_70_42_len_53196_read_count_896652.7 |          |
| 2558669848 | DRAFT_00516 | Coordinates    |                                           | 7537..8307(-)                                    |          |
| 2558669848 | DRAFT_00516 | DNA_length     |                                           | 771bp                                            |          |
| 2558669848 | DRAFT_00516 | Protein_length |                                           | 256aa                                            |          |
| 2558669848 | DRAFT_00516 | GC             |                                           |                                                  | 0.58     |
|            |             |                |                                           |                                                  |          |
| 2558669849 | DRAFT_00517 | pfam01455      | HupF_HypC                                 |                                                  | 5.90E-07 |
| 2558669849 | DRAFT_00517 | Locus_type     |                                           | CDS                                              |          |
| 2558669849 | DRAFT_00517 | Product_name   |                                           | HupF/HypC family                                 |          |
| 2558669849 | DRAFT_00517 | Scaffold       |                                           | DRAFT_contig_70_42_len_53196_read_count_896652.7 |          |
| 2558669849 | DRAFT_00517 | Coordinates    |                                           | 8304..8561(-)                                    |          |
| 2558669849 | DRAFT_00517 | DNA_length     |                                           | 258bp                                            |          |
| 2558669849 | DRAFT_00517 | Protein_length |                                           | 85aa                                             |          |
| 2558669849 | DRAFT_00517 | GC             |                                           |                                                  | 0.61     |
|            |             |                |                                           |                                                  |          |
| 2558669850 | DRAFT_00518 | COG_category   | [G] Carbohydrate transport and metabolism |                                                  |          |
| 2558669850 | DRAFT_00518 | COG2814        | Arabinose efflux permease                 |                                                  | 6.00E-23 |
| 2558669850 | DRAFT_00518 | pfam07690      | MFS_1                                     |                                                  | 8.60E-44 |

|            |             |                |                                                                                |          |
|------------|-------------|----------------|--------------------------------------------------------------------------------|----------|
| 2558669850 | DRAFT_00518 | Locus_type     | CDS                                                                            |          |
| 2558669850 | DRAFT_00518 | Product_name   | Arabinose efflux permease                                                      |          |
| 2558669850 | DRAFT_00518 | Scaffold       | DRAFT_contig_70_42_len_53196_read_count_896652.7                               |          |
| 2558669850 | DRAFT_00518 | Coordinates    | 8617..9849(-)                                                                  |          |
| 2558669850 | DRAFT_00518 | DNA_length     | 1233bp                                                                         |          |
| 2558669850 | DRAFT_00518 | Protein_length | 410aa                                                                          |          |
| 2558669850 | DRAFT_00518 | GC             |                                                                                | 0.6      |
| 2558669850 | DRAFT_00518 | Transmembrane  | Yes                                                                            |          |
| 2558669851 | DRAFT_00519 | KEGG_module    | M00311: 2-oxoglutarate:ferredoxin oxidoreductase                               |          |
| 2558669851 | DRAFT_00519 | KEGG_module    | M00011: Citrate cycle, second carbon oxidation, 2-oxoglutarate => oxaloacetate |          |
| 2558669851 | DRAFT_00519 | Metacyc        | PWY-5392: reductive TCA cycle II                                               |          |
| 2558669851 | DRAFT_00519 | Metacyc        | P42-PWY: incomplete reductive TCA cycle                                        |          |
| 2558669851 | DRAFT_00519 | Metacyc        | REDCITCYC: TCA cycle III (helicobacter)                                        |          |
| 2558669851 | DRAFT_00519 | Metacyc        | P23-PWY: reductive TCA cycle I                                                 |          |
| 2558669851 | DRAFT_00519 | Metacyc        | PWY-6969: TCA cycle V (2-oxoglutarate:ferredoxin oxidoreductase)               |          |
| 2558669851 | DRAFT_00519 | COG_category   | [C] Energy production and conversion                                           |          |
| 2558669851 | DRAFT_00519 | COG1014        | Pyruvate:ferredoxin oxidoreductase and related 2-oxoacid:ferredoxin c          | 2.00E-16 |
| 2558669851 | DRAFT_00519 | pfam01558      | POR                                                                            | 1.40E-25 |
| 2558669851 | DRAFT_00519 | EC:1.2.7.3     | 2-oxoglutarate synthase.                                                       |          |
| 2558669851 | DRAFT_00519 | KO:K00177      | 2-oxoglutarate ferredoxin oxidoreductase subunit gamma [EC:1.2.7.3]            | 8.40E-32 |
| 2558669851 | DRAFT_00519 | Locus_type     | CDS                                                                            |          |
| 2558669851 | DRAFT_00519 | Product_name   | Pyruvate:ferredoxin oxidoreductase and related 2-oxoacid:ferredoxin            |          |
| 2558669851 | DRAFT_00519 | Scaffold       | DRAFT_contig_70_42_len_53196_read_count_896652.7                               |          |
| 2558669851 | DRAFT_00519 | Coordinates    | 9875..10495(-)                                                                 |          |
| 2558669851 | DRAFT_00519 | DNA_length     | 621bp                                                                          |          |
| 2558669851 | DRAFT_00519 | Protein_length | 206aa                                                                          |          |
| 2558669851 | DRAFT_00519 | GC             |                                                                                | 0.59     |
| 2558669852 | DRAFT_00520 | KEGG_module    | M00011: Citrate cycle, second carbon oxidation, 2-oxoglutarate => oxaloacetate |          |
| 2558669852 | DRAFT_00520 | KEGG_module    | M00311: 2-oxoglutarate:ferredoxin oxidoreductase                               |          |
| 2558669852 | DRAFT_00520 | Metacyc        | PWY-6969: TCA cycle V (2-oxoglutarate:ferredoxin oxidoreductase)               |          |
| 2558669852 | DRAFT_00520 | Metacyc        | PWY-5392: reductive TCA cycle II                                               |          |
| 2558669852 | DRAFT_00520 | Metacyc        | P23-PWY: reductive TCA cycle I                                                 |          |

|            |             |                |                                                                                |          |
|------------|-------------|----------------|--------------------------------------------------------------------------------|----------|
| 2558669852 | DRAFT_00520 | Metacyc        | REDCITCYC: TCA cycle III (helicobacter)                                        |          |
| 2558669852 | DRAFT_00520 | Metacyc        | P42-PWY: incomplete reductive TCA cycle                                        |          |
| 2558669852 | DRAFT_00520 | pfam02775      | TPP_enzyme_C                                                                   | 6.50E-21 |
| 2558669852 | DRAFT_00520 | EC:1.2.7.3     | 2-oxoglutarate synthase.                                                       |          |
| 2558669852 | DRAFT_00520 | KO:K00175      | 2-oxoglutarate ferredoxin oxidoreductase subunit beta [EC:1.2.7.3]             | 0.00E+00 |
| 2558669852 | DRAFT_00520 | Locus_type     | CDS                                                                            |          |
| 2558669852 | DRAFT_00520 | Product_name   | Pyruvate:ferredoxin oxidoreductase and related 2-oxoacid:ferredoxin            |          |
| 2558669852 | DRAFT_00520 | Scaffold       | DRAFT_contig_70_42_len_53196_read_count_896652.7                               |          |
| 2558669852 | DRAFT_00520 | Coordinates    | 10492..11304(-)                                                                |          |
| 2558669852 | DRAFT_00520 | DNA_length     | 813bp                                                                          |          |
| 2558669852 | DRAFT_00520 | Protein_length | 270aa                                                                          |          |
| 2558669852 | DRAFT_00520 | GC             |                                                                                | 0.6      |
| 2558669853 | DRAFT_00521 | KEGG_module    | M00312: 2-oxoisovalerate:ferredoxin oxidoreductase                             |          |
| 2558669853 | DRAFT_00521 | COG_category   | [C] Energy production and conversion                                           |          |
| 2558669853 | DRAFT_00521 | COG0674        | Pyruvate:ferredoxin oxidoreductase and related 2-oxoacid:ferredoxin c          | 4.00E-51 |
| 2558669853 | DRAFT_00521 | pfam01855      | POR_N                                                                          | 4.70E-48 |
| 2558669853 | DRAFT_00521 | pfam02780      | Transketolase_C                                                                | 1.80E-06 |
| 2558669853 | DRAFT_00521 | EC:1.2.7.7     | 3-methyl-2-oxobutanoate dehydrogenase (ferredoxin).                            |          |
| 2558669853 | DRAFT_00521 | KO:K00186      | 2-oxoisovalerate ferredoxin oxidoreductase, alpha subunit [EC:1.2.7.7]         | 0.00E+00 |
| 2558669853 | DRAFT_00521 | ITERM:00694    | ketoisovalerate ferredoxin oxidoreductase, alpha subunit (EC 1.2.7.7)          |          |
| 2558669853 | DRAFT_00521 | Locus_type     | CDS                                                                            |          |
| 2558669853 | DRAFT_00521 | Product_name   | ketoisovalerate ferredoxin oxidoreductase, alpha subunit (EC 1.2.7.7)          |          |
| 2558669853 | DRAFT_00521 | Scaffold       | DRAFT_contig_70_42_len_53196_read_count_896652.7                               |          |
| 2558669853 | DRAFT_00521 | Coordinates    | 11301..12368(-)                                                                |          |
| 2558669853 | DRAFT_00521 | DNA_length     | 1068bp                                                                         |          |
| 2558669853 | DRAFT_00521 | Protein_length | 355aa                                                                          |          |
| 2558669853 | DRAFT_00521 | GC             |                                                                                | 0.58     |
| 2558669854 | DRAFT_00522 | KEGG_module    | M00011: Citrate cycle, second carbon oxidation, 2-oxoglutarate => oxaloacetate |          |
| 2558669854 | DRAFT_00522 | KEGG_module    | M00311: 2-oxoglutarate:ferredoxin oxidoreductase                               |          |
| 2558669854 | DRAFT_00522 | Metacyc        | P23-PWY: reductive TCA cycle I                                                 |          |
| 2558669854 | DRAFT_00522 | Metacyc        | REDCITCYC: TCA cycle III (helicobacter)                                        |          |
| 2558669854 | DRAFT_00522 | Metacyc        | P42-PWY: incomplete reductive TCA cycle                                        |          |



|            |             |                |                                                                     |           |
|------------|-------------|----------------|---------------------------------------------------------------------|-----------|
| 2558669854 | DRAFT_00522 | Metacyc        | PWY-6969: TCA cycle V (2-oxoglutarate:ferredoxin oxidoreductase)    |           |
| 2558669854 | DRAFT_00522 | Metacyc        | PWY-5392: reductive TCA cycle II                                    |           |
| 2558669854 | DRAFT_00522 | pfam12838      | Fer4_7                                                              | 6.50E-09  |
| 2558669854 | DRAFT_00522 | EC:1.2.7.3     | 2-oxoglutarate synthase.                                            |           |
| 2558669854 | DRAFT_00522 | KO:K00176      | 2-oxoglutarate ferredoxin oxidoreductase subunit delta [EC:1.2.7.3] | 1.60E-13  |
| 2558669854 | DRAFT_00522 | Locus_type     | CDS                                                                 |           |
| 2558669854 | DRAFT_00522 | Product_name   | Indolepyruvate ferredoxin oxidoreductase, alpha and beta subunits   |           |
| 2558669854 | DRAFT_00522 | Scaffold       | DRAFT_contig_70_42_len_53196_read_count_896652.7                    |           |
| 2558669854 | DRAFT_00522 | Coordinates    | 12365..12616(-)                                                     |           |
| 2558669854 | DRAFT_00522 | DNA_length     | 252bp                                                               |           |
| 2558669854 | DRAFT_00522 | Protein_length | 83aa                                                                |           |
| 2558669854 | DRAFT_00522 | GC             |                                                                     | 0.56      |
| 2558669855 | DRAFT_00523 | KEGG_module    | M00169: CAM (Crassulacean acid metabolism), light                   |           |
| 2558669855 | DRAFT_00523 | KEGG_module    | M00171: C4-dicarboxylic acid cycle, NAD+ -malic enzyme type         |           |
| 2558669855 | DRAFT_00523 | KEGG_module    | M00173: Reductive citric acid cycle (Arnon-Buchanan cycle)          |           |
| 2558669855 | DRAFT_00523 | KEGG_module    | M00172: C4-dicarboxylic acid cycle, NADP+ -malic enzyme type        |           |
| 2558669855 | DRAFT_00523 | Metacyc        | PWY-6549: glutamine biosynthesis III                                |           |
| 2558669855 | DRAFT_00523 | Metacyc        | PWY-7117: C4 photosynthetic carbon assimilation cycle, PEPCK type   |           |
| 2558669855 | DRAFT_00523 | Metacyc        | PWY-241: C4 photosynthetic carbon assimilation cycle, NADP-ME type  |           |
| 2558669855 | DRAFT_00523 | Metacyc        | PWY-7115: C4 photosynthetic carbon assimilation cycle, NAD-ME type  |           |
| 2558669855 | DRAFT_00523 | IMG_pathway    | 289: Oxaloacetate synthesis via phosphoenolpyruvate                 |           |
| 2558669855 | DRAFT_00523 | COG_category   | [G] Carbohydrate transport and metabolism                           |           |
| 2558669855 | DRAFT_00523 | COG0574        | Phosphoenolpyruvate synthase/pyruvate phosphate dikinase            | 0.00E+00  |
| 2558669855 | DRAFT_00523 | pfam00391      | PEP-utilizers                                                       | 4.00E-21  |
| 2558669855 | DRAFT_00523 | pfam02896      | PEP-utilizers_C                                                     | 1.40E-100 |
| 2558669855 | DRAFT_00523 | pfam01326      | PPDK_N                                                              | 7.40E-64  |
| 2558669855 | DRAFT_00523 | EC:2.7.9.1     | Pyruvate, phosphate dikinase.                                       |           |
| 2558669855 | DRAFT_00523 | TIGR01828      | pyruvate, phosphate dikinase                                        | 0.00E+00  |
| 2558669855 | DRAFT_00523 | KO:K01006      | pyruvate,orthophosphate dikinase [EC:2.7.9.1]                       | 0.00E+00  |
| 2558669855 | DRAFT_00523 | ITERM:00813    | pyruvate phosphate dikinase (EC 2.7.9.1)                            |           |
| 2558669855 | DRAFT_00523 | Locus_type     | CDS                                                                 |           |
| 2558669855 | DRAFT_00523 | Product_name   | pyruvate phosphate dikinase (EC 2.7.9.1)                            |           |
| 2558669855 | DRAFT_00523 | Scaffold       | DRAFT_contig_70_42_len_53196_read_count_896652.7                    |           |

|            |             |                |                                                                      |          |
|------------|-------------|----------------|----------------------------------------------------------------------|----------|
| 2558669855 | DRAFT_00523 | Coordinates    | 12707..15355(-)                                                      |          |
| 2558669855 | DRAFT_00523 | DNA_length     | 2649bp                                                               |          |
| 2558669855 | DRAFT_00523 | Protein_length | 882aa                                                                |          |
| 2558669855 | DRAFT_00523 | GC             |                                                                      | 0.59     |
| 2558669856 | DRAFT_00524 | pfam00583      | Acetyltransf_1                                                       | 1.40E-18 |
| 2558669856 | DRAFT_00524 | Locus_type     | CDS                                                                  |          |
| 2558669856 | DRAFT_00524 | Product_name   | Predicted acetyltransferase                                          |          |
| 2558669856 | DRAFT_00524 | Scaffold       | DRAFT_contig_70_42_len_53196_read_count_896652.7                     |          |
| 2558669856 | DRAFT_00524 | Coordinates    | 15402..15953(-)                                                      |          |
| 2558669856 | DRAFT_00524 | DNA_length     | 552bp                                                                |          |
| 2558669856 | DRAFT_00524 | Protein_length | 183aa                                                                |          |
| 2558669856 | DRAFT_00524 | GC             |                                                                      | 0.57     |
| 2558669857 | DRAFT_00525 | COG_category   | [E] Amino acid transport and metabolism                              |          |
| 2558669857 | DRAFT_00525 | COG1748        | Saccharopine dehydrogenase and related proteins                      | 3.00E-56 |
| 2558669857 | DRAFT_00525 | pfam03435      | Saccharop_dh                                                         | 7.30E-53 |
| 2558669857 | DRAFT_00525 | Locus_type     | CDS                                                                  |          |
| 2558669857 | DRAFT_00525 | Product_name   | Saccharopine dehydrogenase and related proteins                      |          |
| 2558669857 | DRAFT_00525 | Scaffold       | DRAFT_contig_70_42_len_53196_read_count_896652.7                     |          |
| 2558669857 | DRAFT_00525 | Coordinates    | 16115..17266(-)                                                      |          |
| 2558669857 | DRAFT_00525 | DNA_length     | 1152bp                                                               |          |
| 2558669857 | DRAFT_00525 | Protein_length | 383aa                                                                |          |
| 2558669857 | DRAFT_00525 | GC             |                                                                      | 0.61     |
| 2558669858 | DRAFT_00526 | pfam00571      | CBS                                                                  | 1.00E-10 |
| 2558669858 | DRAFT_00526 | pfam00571      | CBS                                                                  | 1.80E-07 |
| 2558669858 | DRAFT_00526 | pfam13894      | zf-C2H2_4                                                            | 9.80E-05 |
| 2558669858 | DRAFT_00526 | Locus_type     | CDS                                                                  |          |
| 2558669858 | DRAFT_00526 | Product_name   | Predicted signal-transduction protein containing cAMP-binding and Cl |          |
| 2558669858 | DRAFT_00526 | Scaffold       | DRAFT_contig_70_42_len_53196_read_count_896652.7                     |          |
| 2558669858 | DRAFT_00526 | Coordinates    | 17347..17892(+)                                                      |          |
| 2558669858 | DRAFT_00526 | DNA_length     | 546bp                                                                |          |
| 2558669858 | DRAFT_00526 | Protein_length | 181aa                                                                |          |

|            |             |                |                                                                       |           |
|------------|-------------|----------------|-----------------------------------------------------------------------|-----------|
| 2558669858 | DRAFT_00526 | GC             |                                                                       | 0.62      |
| 2558669859 | DRAFT_00527 | COG_category   | [E] Amino acid transport and metabolism                               |           |
| 2558669859 | DRAFT_00527 | COG0624        | Acetylnornithine deacetylase/Succinyl-diaminopimelate desuccinylase a | 3.00E-51  |
| 2558669859 | DRAFT_00527 | pfam01546      | Peptidase_M20                                                         | 5.00E-31  |
| 2558669859 | DRAFT_00527 | pfam07687      | M20_dimer                                                             | 9.20E-19  |
| 2558669859 | DRAFT_00527 | Locus_type     | CDS                                                                   |           |
| 2558669859 | DRAFT_00527 | Product_name   | Acetylnornithine deacetylase/Succinyl-diaminopimelate desuccinylase   |           |
| 2558669859 | DRAFT_00527 | Scaffold       | DRAFT_contig_70_42_len_53196_read_count_896652.7                      |           |
| 2558669859 | DRAFT_00527 | Coordinates    | 17894..19252(-)                                                       |           |
| 2558669859 | DRAFT_00527 | DNA_length     | 1359bp                                                                |           |
| 2558669859 | DRAFT_00527 | Protein_length | 452aa                                                                 |           |
| 2558669859 | DRAFT_00527 | GC             |                                                                       | 0.6       |
| 2558669860 | DRAFT_00528 | COG_category   | [P] Inorganic ion transport and metabolism                            |           |
| 2558669860 | DRAFT_00528 | COG2217        | Cation transport ATPase                                               | 0.00E+00  |
| 2558669860 | DRAFT_00528 | pfam00702      | Hydrolase                                                             | 2.90E-55  |
| 2558669860 | DRAFT_00528 | pfam00122      | E1-E2_ATPase                                                          | 3.40E-61  |
| 2558669860 | DRAFT_00528 | pfam04945      | YHS                                                                   | 2.40E-06  |
| 2558669860 | DRAFT_00528 | EC:3.6.3.4     | Copper-exporting ATPase.                                              |           |
| 2558669860 | DRAFT_00528 | TIGR01494      | ATPase, P-type (transporting), HAD superfamily, subfamily IC          | 1.70E-100 |
| 2558669860 | DRAFT_00528 | TIGR01511      | copper-(or silver)-translocating P-type ATPase                        | 0.00E+00  |
| 2558669860 | DRAFT_00528 | TIGR01525      | heavy metal translocating P-type ATPase                               | 0.00E+00  |
| 2558669860 | DRAFT_00528 | KO:K01533      | Cu <sup>2+</sup> -exporting ATPase [EC:3.6.3.4]                       | 0.00E+00  |
| 2558669860 | DRAFT_00528 | Locus_type     | CDS                                                                   |           |
| 2558669860 | DRAFT_00528 | Product_name   | copper-(or silver)-translocating P-type ATPase                        |           |
| 2558669860 | DRAFT_00528 | Scaffold       | DRAFT_contig_70_42_len_53196_read_count_896652.7                      |           |
| 2558669860 | DRAFT_00528 | Coordinates    | 19331..21385(-)                                                       |           |
| 2558669860 | DRAFT_00528 | DNA_length     | 2055bp                                                                |           |
| 2558669860 | DRAFT_00528 | Protein_length | 684aa                                                                 |           |
| 2558669860 | DRAFT_00528 | GC             |                                                                       | 0.6       |
| 2558669860 | DRAFT_00528 | Transmembrane  | Yes                                                                   |           |
| 2558669861 | DRAFT_00529 | COG_category   | [S] Function unknown                                                  |           |

|            |             |                |                                                                   |          |
|------------|-------------|----------------|-------------------------------------------------------------------|----------|
| 2558669861 | DRAFT_00529 | COG3350        | Uncharacterized conserved protein                                 | 1.00E-06 |
| 2558669861 | DRAFT_00529 | pfam04945      | YHS                                                               | 4.10E-11 |
| 2558669861 | DRAFT_00529 | Locus_type     | CDS                                                               |          |
| 2558669861 | DRAFT_00529 | Product_name   | Uncharacterized conserved protein                                 |          |
| 2558669861 | DRAFT_00529 | Scaffold       | DRAFT_contig_70_42_len_53196_read_count_896652.7                  |          |
| 2558669861 | DRAFT_00529 | Coordinates    | 21458..21616(+)                                                   |          |
| 2558669861 | DRAFT_00529 | DNA_length     | 159bp                                                             |          |
| 2558669861 | DRAFT_00529 | Protein_length | 52aa                                                              |          |
| 2558669861 | DRAFT_00529 | GC             |                                                                   | 0.55     |
| 2558669862 | DRAFT_00530 | Metacyc        | GLUCONEO-PWY: gluconeogenesis I                                   |          |
| 2558669862 | DRAFT_00530 | Metacyc        | PWY-7118: chitin degradation to ethanol                           |          |
| 2558669862 | DRAFT_00530 | COG_category   | [C] Energy production and conversion                              |          |
| 2558669862 | DRAFT_00530 | COG0281        | Malic enzyme                                                      | 0.00E+00 |
| 2558669862 | DRAFT_00530 | pfam03949      | Malic_M                                                           | 5.90E-60 |
| 2558669862 | DRAFT_00530 | pfam00390      | malic                                                             | 9.40E-25 |
| 2558669862 | DRAFT_00530 | EC:1.1.1.38    | Malate dehydrogenase (oxaloacetate-decarboxylating).              |          |
| 2558669862 | DRAFT_00530 | KO:K00027      | malate dehydrogenase (oxaloacetate-decarboxylating) [EC:1.1.1.38] | 0.00E+00 |
| 2558669862 | DRAFT_00530 | Locus_type     | CDS                                                               |          |
| 2558669862 | DRAFT_00530 | Product_name   | Malic enzyme                                                      |          |
| 2558669862 | DRAFT_00530 | Scaffold       | DRAFT_contig_70_42_len_53196_read_count_896652.7                  |          |
| 2558669862 | DRAFT_00530 | Coordinates    | 21726..23108(+)                                                   |          |
| 2558669862 | DRAFT_00530 | DNA_length     | 1383bp                                                            |          |
| 2558669862 | DRAFT_00530 | Protein_length | 460aa                                                             |          |
| 2558669862 | DRAFT_00530 | GC             |                                                                   | 0.55     |
| 2558669863 | DRAFT_00531 | COG_category   | [O] Posttranslational modification, protein turnover, chaperones  |          |
| 2558669863 | DRAFT_00531 | COG1225        | Peroxiredoxin                                                     | 2.00E-56 |
| 2558669863 | DRAFT_00531 | pfam00578      | AhpC-TSA                                                          | 1.70E-37 |
| 2558669863 | DRAFT_00531 | EC:1.11.1.15   | Peroxiredoxin.                                                    |          |
| 2558669863 | DRAFT_00531 | KO:K03564      | peroxiredoxin Q/BCP [EC:1.11.1.15]                                | 0.00E+00 |
| 2558669863 | DRAFT_00531 | Locus_type     | CDS                                                               |          |
| 2558669863 | DRAFT_00531 | Product_name   | Peroxiredoxin                                                     |          |
| 2558669863 | DRAFT_00531 | Scaffold       | DRAFT_contig_70_42_len_53196_read_count_896652.7                  |          |

|            |             |                |                                                     |           |
|------------|-------------|----------------|-----------------------------------------------------|-----------|
| 2558669863 | DRAFT_00531 | Coordinates    | 23372..23848(-)                                     |           |
| 2558669863 | DRAFT_00531 | DNA_length     | 477bp                                               |           |
| 2558669863 | DRAFT_00531 | Protein_length | 158aa                                               |           |
| 2558669863 | DRAFT_00531 | GC             |                                                     | 0.56      |
| 2558669864 | DRAFT_00532 | COG_category   | [E] Amino acid transport and metabolism             |           |
| 2558669864 | DRAFT_00532 | COG2309        | Leucyl aminopeptidase (aminopeptidase T)            | 2.00E-05  |
| 2558669864 | DRAFT_00532 | pfam02073      | Peptidase_M29                                       | 5.10E-12  |
| 2558669864 | DRAFT_00532 | Locus_type     | CDS                                                 |           |
| 2558669864 | DRAFT_00532 | Product_name   | Leucyl aminopeptidase (aminopeptidase T)            |           |
| 2558669864 | DRAFT_00532 | Scaffold       | DRAFT_contig_70_42_len_53196_read_count_896652.7    |           |
| 2558669864 | DRAFT_00532 | Coordinates    | 24026..25075(-)                                     |           |
| 2558669864 | DRAFT_00532 | DNA_length     | 1050bp                                              |           |
| 2558669864 | DRAFT_00532 | Protein_length | 349aa                                               |           |
| 2558669864 | DRAFT_00532 | GC             |                                                     | 0.59      |
| 2558669865 | DRAFT_00533 | Locus_type     | CDS                                                 |           |
| 2558669865 | DRAFT_00533 | Product_name   | hypothetical protein                                |           |
| 2558669865 | DRAFT_00533 | Scaffold       | DRAFT_contig_70_42_len_53196_read_count_896652.7    |           |
| 2558669865 | DRAFT_00533 | Coordinates    | 25138..25458(-)                                     |           |
| 2558669865 | DRAFT_00533 | DNA_length     | 321bp                                               |           |
| 2558669865 | DRAFT_00533 | Protein_length | 106aa                                               |           |
| 2558669865 | DRAFT_00533 | GC             |                                                     | 0.57      |
| 2558669866 | DRAFT_00534 | KEGG_module    | M00359: Aminoacyl-tRNA biosynthesis, eukaryotes     |           |
| 2558669866 | DRAFT_00534 | KEGG_module    | M00360: Aminoacyl-tRNA biosynthesis, prokaryotes    |           |
| 2558669866 | DRAFT_00534 | Metacyc        | TRNA-CHARGING-PWY: tRNA charging                    |           |
| 2558669866 | DRAFT_00534 | IMG_pathway    | 488: L-cysteine ligation to tRNA(Cys)               |           |
| 2558669866 | DRAFT_00534 | COG_category   | [J] Translation, ribosomal structure and biogenesis |           |
| 2558669866 | DRAFT_00534 | COG0215        | Cysteinyl-tRNA synthetase                           | 1.00E-117 |
| 2558669866 | DRAFT_00534 | pfam01406      | tRNA-synt_1e                                        | 1.30E-89  |
| 2558669866 | DRAFT_00534 | pfam09190      | DALR_2                                              | 3.30E-07  |
| 2558669866 | DRAFT_00534 | EC:6.1.1.16    | Cysteine--tRNA ligase.                              |           |
| 2558669866 | DRAFT_00534 | TIGR00435      | cysteinyl-tRNA synthetase                           | 1.90E-111 |

|            |             |                |                                                  |          |
|------------|-------------|----------------|--------------------------------------------------|----------|
| 2558669866 | DRAFT_00534 | KO:K01883      | cysteinyI-tRNA synthetase [EC:6.1.1.16]          | 0.00E+00 |
| 2558669866 | DRAFT_00534 | ITERM:00404    | cysteinyI-tRNA synthetase (EC 6.1.1.16)          |          |
| 2558669866 | DRAFT_00534 | Locus_type     | CDS                                              |          |
| 2558669866 | DRAFT_00534 | Product_name   | cysteinyI-tRNA synthetase (EC 6.1.1.16)          |          |
| 2558669866 | DRAFT_00534 | Scaffold       | DRAFT_contig_70_42_len_53196_read_count_896652.7 |          |
| 2558669866 | DRAFT_00534 | Coordinates    | 25500..26699(+)                                  |          |
| 2558669866 | DRAFT_00534 | DNA_length     | 1200bp                                           |          |
| 2558669866 | DRAFT_00534 | Protein_length | 399aa                                            |          |
| 2558669866 | DRAFT_00534 | GC             |                                                  | 0.6      |
|            |             |                |                                                  |          |
| 2558669867 | DRAFT_00535 | pfam13508      | Acetyltransf_7                                   | 2.20E-07 |
| 2558669867 | DRAFT_00535 | Locus_type     | CDS                                              |          |
| 2558669867 | DRAFT_00535 | Product_name   | Acetyltransferase (GNAT) domain                  |          |
| 2558669867 | DRAFT_00535 | Scaffold       | DRAFT_contig_70_42_len_53196_read_count_896652.7 |          |
| 2558669867 | DRAFT_00535 | Coordinates    | 26692..27462(+)                                  |          |
| 2558669867 | DRAFT_00535 | DNA_length     | 771bp                                            |          |
| 2558669867 | DRAFT_00535 | Protein_length | 256aa                                            |          |
| 2558669867 | DRAFT_00535 | GC             |                                                  | 0.57     |
|            |             |                |                                                  |          |
| 2558669868 | DRAFT_00536 | Locus_type     | CDS                                              |          |
| 2558669868 | DRAFT_00536 | Product_name   | hypothetical protein                             |          |
| 2558669868 | DRAFT_00536 | Scaffold       | DRAFT_contig_70_42_len_53196_read_count_896652.7 |          |
| 2558669868 | DRAFT_00536 | Coordinates    | 27470..27952(+)                                  |          |
| 2558669868 | DRAFT_00536 | DNA_length     | 483bp                                            |          |
| 2558669868 | DRAFT_00536 | Protein_length | 160aa                                            |          |
| 2558669868 | DRAFT_00536 | GC             |                                                  | 0.57     |
|            |             |                |                                                  |          |
| 2558669869 | DRAFT_00537 | Locus_type     | CDS                                              |          |
| 2558669869 | DRAFT_00537 | Product_name   | hypothetical protein                             |          |
| 2558669869 | DRAFT_00537 | Scaffold       | DRAFT_contig_70_42_len_53196_read_count_896652.7 |          |
| 2558669869 | DRAFT_00537 | Coordinates    | 28100..28504(-)                                  |          |
| 2558669869 | DRAFT_00537 | DNA_length     | 405bp                                            |          |
| 2558669869 | DRAFT_00537 | Protein_length | 134aa                                            |          |
| 2558669869 | DRAFT_00537 | GC             |                                                  | 0.6      |

|            |             |                |                                         |                                                  |          |
|------------|-------------|----------------|-----------------------------------------|--------------------------------------------------|----------|
| 2558669870 | DRAFT_00538 | pfam09969      | DUF2203                                 |                                                  | 9.70E-24 |
| 2558669870 | DRAFT_00538 | Locus_type     |                                         | CDS                                              |          |
| 2558669870 | DRAFT_00538 | Product_name   |                                         | Uncharacterized conserved protein (DUF2203)      |          |
| 2558669870 | DRAFT_00538 | Scaffold       |                                         | DRAFT_contig_70_42_len_53196_read_count_896652.7 |          |
| 2558669870 | DRAFT_00538 | Coordinates    |                                         | 28589..28876(-)                                  |          |
| 2558669870 | DRAFT_00538 | DNA_length     |                                         | 288bp                                            |          |
| 2558669870 | DRAFT_00538 | Protein_length |                                         | 95aa                                             |          |
| 2558669870 | DRAFT_00538 | GC             |                                         |                                                  | 0.57     |
| 2558669871 | DRAFT_00539 | COG_category   | [S] Function unknown                    |                                                  |          |
| 2558669871 | DRAFT_00539 | COG5616        | Predicted integral membrane protein     |                                                  | 4.00E-36 |
| 2558669871 | DRAFT_00539 | pfam00211      | Guanylate_cyc                           |                                                  | 1.40E-24 |
| 2558669871 | DRAFT_00539 | pfam13414      | TPR_11                                  |                                                  | 9.90E-09 |
| 2558669871 | DRAFT_00539 | pfam13414      | TPR_11                                  |                                                  | 1.20E-06 |
| 2558669871 | DRAFT_00539 | EC:4.6.1.1     | Adenylate cyclase.                      |                                                  |          |
| 2558669871 | DRAFT_00539 | KO:K01768      | adenylate cyclase [EC:4.6.1.1]          |                                                  | 0.00E+00 |
| 2558669871 | DRAFT_00539 | Locus_type     |                                         | CDS                                              |          |
| 2558669871 | DRAFT_00539 | Product_name   |                                         | Predicted integral membrane protein              |          |
| 2558669871 | DRAFT_00539 | Scaffold       |                                         | DRAFT_contig_70_42_len_53196_read_count_896652.7 |          |
| 2558669871 | DRAFT_00539 | Coordinates    |                                         | 29353..31323(-)                                  |          |
| 2558669871 | DRAFT_00539 | DNA_length     |                                         | 1971bp                                           |          |
| 2558669871 | DRAFT_00539 | Protein_length |                                         | 656aa                                            |          |
| 2558669871 | DRAFT_00539 | GC             |                                         |                                                  | 0.55     |
| 2558669872 | DRAFT_00540 | pfam05048      | NosD                                    |                                                  | 5.40E-16 |
| 2558669872 | DRAFT_00540 | TIGR03804      | parallel beta-helix repeat (two copies) |                                                  | 2.10E-08 |
| 2558669872 | DRAFT_00540 | Locus_type     |                                         | CDS                                              |          |
| 2558669872 | DRAFT_00540 | Product_name   |                                         | parallel beta-helix repeat (two copies)          |          |
| 2558669872 | DRAFT_00540 | Scaffold       |                                         | DRAFT_contig_70_42_len_53196_read_count_896652.7 |          |
| 2558669872 | DRAFT_00540 | Coordinates    |                                         | 31585..34266(+)                                  |          |
| 2558669872 | DRAFT_00540 | DNA_length     |                                         | 2682bp                                           |          |
| 2558669872 | DRAFT_00540 | Protein_length |                                         | 893aa                                            |          |
| 2558669872 | DRAFT_00540 | GC             |                                         |                                                  | 0.57     |

|            |             |                |                                                                       |          |
|------------|-------------|----------------|-----------------------------------------------------------------------|----------|
| 2558669872 | DRAFT_00540 | Transmembrane  | Yes                                                                   |          |
| 2558669873 | DRAFT_00541 | COG_category   | [S] Function unknown                                                  |          |
| 2558669873 | DRAFT_00541 | COG2096        | Uncharacterized conserved protein                                     | 2.00E-46 |
| 2558669873 | DRAFT_00541 | pfam01923      | Cob_adeno_trans                                                       | 2.50E-51 |
| 2558669873 | DRAFT_00541 | TIGR00636      | ATP:cob(I)alamin adenosyltransferase                                  | 4.20E-57 |
| 2558669873 | DRAFT_00541 | Locus_type     | CDS                                                                   |          |
| 2558669873 | DRAFT_00541 | Product_name   | ATP:cob(I)alamin adenosyltransferase                                  |          |
| 2558669873 | DRAFT_00541 | Scaffold       | DRAFT_contig_70_42_len_53196_read_count_896652.7                      |          |
| 2558669873 | DRAFT_00541 | Coordinates    | 34603..35136(+)                                                       |          |
| 2558669873 | DRAFT_00541 | DNA_length     | 534bp                                                                 |          |
| 2558669873 | DRAFT_00541 | Protein_length | 177aa                                                                 |          |
| 2558669873 | DRAFT_00541 | GC             |                                                                       | 0.58     |
| 2558669874 | DRAFT_00542 | Metacyc        | PWY0-321: phenylacetate degradation I (aerobic)                       |          |
| 2558669874 | DRAFT_00542 | COG_category   | [I] Lipid transport and metabolism                                    |          |
| 2558669874 | DRAFT_00542 | COG1024        | Enoyl-CoA hydratase/carnithine racemase                               | 1.00E-44 |
| 2558669874 | DRAFT_00542 | pfam00378      | ECH                                                                   | 4.70E-47 |
| 2558669874 | DRAFT_00542 | EC:5.3.3.18    | 2-(1,2-epoxy-1,2-dihydrophenyl)acetyl-CoA isomerase.                  |          |
| 2558669874 | DRAFT_00542 | KO:K15866      | 2-(1,2-epoxy-1,2-dihydrophenyl)acetyl-CoA isomerase [EC:5.3.3.18]     | 0.00E+00 |
| 2558669874 | DRAFT_00542 | Locus_type     | CDS                                                                   |          |
| 2558669874 | DRAFT_00542 | Product_name   | Enoyl-CoA hydratase/carnithine racemase                               |          |
| 2558669874 | DRAFT_00542 | Scaffold       | DRAFT_contig_70_42_len_53196_read_count_896652.7                      |          |
| 2558669874 | DRAFT_00542 | Coordinates    | 35147..35890(-)                                                       |          |
| 2558669874 | DRAFT_00542 | DNA_length     | 744bp                                                                 |          |
| 2558669874 | DRAFT_00542 | Protein_length | 247aa                                                                 |          |
| 2558669874 | DRAFT_00542 | GC             |                                                                       | 0.6      |
| 2558669875 | DRAFT_00543 | KEGG_module    | M00013: Malonate semialdehyde pathway, propanoyl-CoA => Acetyl-CoA    |          |
| 2558669875 | DRAFT_00543 | KEGG_module    | M00087: beta-Oxidation                                                |          |
| 2558669875 | DRAFT_00543 | KEGG_module    | M00032: Lysine degradation, lysine => saccharopine => acetoacetyl-CoA |          |
| 2558669875 | DRAFT_00543 | Metacyc        | PWY-6435: 4-hydroxybenzoate biosynthesis V                            |          |
| 2558669875 | DRAFT_00543 | Metacyc        | PWY-7046: 4-coumarate degradation (anaerobic)                         |          |
| 2558669875 | DRAFT_00543 | Metacyc        | PWY-5138: unsaturated, even numbered fatty acid & beta;-oxidation     |          |



|            |             |                |                                                               |          |
|------------|-------------|----------------|---------------------------------------------------------------|----------|
| 2558669875 | DRAFT_00543 | Metacyc        | PWY-5136: fatty acid &beta;-oxidation II (peroxisome)         |          |
| 2558669875 | DRAFT_00543 | Metacyc        | ILEUDEG-PWY: isoleucine degradation I                         |          |
| 2558669875 | DRAFT_00543 | Metacyc        | PWY-7007: methyl ketone biosynthesis                          |          |
| 2558669875 | DRAFT_00543 | Metacyc        | FAO-PWY: fatty acid &beta;-oxidation I                        |          |
| 2558669875 | DRAFT_00543 | Metacyc        | PWY-5109: 2-methylbutyrate biosynthesis                       |          |
| 2558669875 | DRAFT_00543 | Metacyc        | VALDEG-PWY: valine degradation I                              |          |
| 2558669875 | DRAFT_00543 | Metacyc        | PWY66-391: fatty acid &beta;-oxidation VI (peroxisome)        |          |
| 2558669875 | DRAFT_00543 | Metacyc        | PWY-735: jasmonic acid biosynthesis                           |          |
| 2558669875 | DRAFT_00543 | Metacyc        | PWY-7094: fatty acid salvage                                  |          |
| 2558669875 | DRAFT_00543 | Metacyc        | PWY0-321: phenylacetate degradation I (aerobic)               |          |
| 2558669875 | DRAFT_00543 | IMG_pathway    | 222: L-isoleucine degradation to propionyl-CoA and acetyl-CoA |          |
| 2558669875 | DRAFT_00543 | IMG_pathway    | 227: L-valine degradation to propionyl-CoA                    |          |
| 2558669875 | DRAFT_00543 | COG_category   | [I] Lipid transport and metabolism                            |          |
| 2558669875 | DRAFT_00543 | COG1024        | Enoyl-CoA hydratase/carnithine racemase                       | 4.00E-62 |
| 2558669875 | DRAFT_00543 | pfam00378      | ECH                                                           | 4.90E-72 |
| 2558669875 | DRAFT_00543 | EC:4.2.1.17    | Enoyl-CoA hydratase.                                          |          |
| 2558669875 | DRAFT_00543 | KO:K01692      | enoyl-CoA hydratase [EC:4.2.1.17]                             | 0.00E+00 |
| 2558669875 | DRAFT_00543 | ITERM:00575    | short chain enoyl-CoA hydratase (EC 4.2.1.17)                 |          |
| 2558669875 | DRAFT_00543 | Locus_type     | CDS                                                           |          |
| 2558669875 | DRAFT_00543 | Product_name   | short chain enoyl-CoA hydratase (EC 4.2.1.17)                 |          |
| 2558669875 | DRAFT_00543 | Scaffold       | DRAFT_contig_70_42_len_53196_read_count_896652.7              |          |
| 2558669875 | DRAFT_00543 | Coordinates    | 35891..36667(-)                                               |          |
| 2558669875 | DRAFT_00543 | DNA_length     | 777bp                                                         |          |
| 2558669875 | DRAFT_00543 | Protein_length | 258aa                                                         |          |
| 2558669875 | DRAFT_00543 | GC             |                                                               | 0.58     |
| 2558669876 | DRAFT_00544 | Locus_type     | CDS                                                           |          |
| 2558669876 | DRAFT_00544 | Product_name   | hypothetical protein                                          |          |
| 2558669876 | DRAFT_00544 | Scaffold       | DRAFT_contig_70_42_len_53196_read_count_896652.7              |          |
| 2558669876 | DRAFT_00544 | Coordinates    | 36915..37106(+)                                               |          |
| 2558669876 | DRAFT_00544 | DNA_length     | 192bp                                                         |          |
| 2558669876 | DRAFT_00544 | Protein_length | 63aa                                                          |          |
| 2558669876 | DRAFT_00544 | GC             |                                                               | 0.54     |

|            |             |                |                                                                                        |          |
|------------|-------------|----------------|----------------------------------------------------------------------------------------|----------|
| 2558669877 | DRAFT_00545 | KEGG_module    | M00088: Ketone body biosynthesis, acetyl-CoA => acetoacetate/3-hydroxybutyrate/acetone |          |
| 2558669877 | DRAFT_00545 | Metacyc        | PWY66-367: ketogenesis                                                                 |          |
| 2558669877 | DRAFT_00545 | Metacyc        | PWY66-368: ketolysis                                                                   |          |
| 2558669877 | DRAFT_00545 | COG_category   | [R] General function prediction only                                                   |          |
| 2558669877 | DRAFT_00545 | COG_category   | [Q] Secondary metabolites biosynthesis, transport and catabolism                       |          |
| 2558669877 | DRAFT_00545 | COG_category   | [I] Lipid transport and metabolism                                                     |          |
| 2558669877 | DRAFT_00545 | COG1028        | Dehydrogenases with different specificities (related to short-chain alco               | 5.00E-43 |
| 2558669877 | DRAFT_00545 | pfam00106      | adh_short                                                                              | 3.10E-30 |
| 2558669877 | DRAFT_00545 | EC:1.1.1.30    | 3-hydroxybutyrate dehydrogenase.                                                       |          |
| 2558669877 | DRAFT_00545 | TIGR01963      | 3-hydroxybutyrate dehydrogenase                                                        | 4.40E-98 |
| 2558669877 | DRAFT_00545 | KO:K00019      | 3-hydroxybutyrate dehydrogenase [EC:1.1.1.30]                                          | 0.00E+00 |
| 2558669877 | DRAFT_00545 | Locus_type     | CDS                                                                                    |          |
| 2558669877 | DRAFT_00545 | Product_name   | 3-hydroxybutyrate dehydrogenase                                                        |          |
| 2558669877 | DRAFT_00545 | Scaffold       | DRAFT_contig_70_42_len_53196_read_count_896652.7                                       |          |
| 2558669877 | DRAFT_00545 | Coordinates    | 37031..37831(-)                                                                        |          |
| 2558669877 | DRAFT_00545 | DNA_length     | 801bp                                                                                  |          |
| 2558669877 | DRAFT_00545 | Protein_length | 266aa                                                                                  |          |
| 2558669877 | DRAFT_00545 | GC             |                                                                                        | 0.53     |
| 2558669878 | DRAFT_00546 | Metacyc        | PWY-5958: acridone alkaloid biosynthesis                                               |          |
| 2558669878 | DRAFT_00546 | Metacyc        | PWY-6948: sitosterol degradation to androstenedione                                    |          |
| 2558669878 | DRAFT_00546 | Metacyc        | PWY-5789: 3-hydroxypropionate/4-hydroxybutyrate cycle                                  |          |
| 2558669878 | DRAFT_00546 | Metacyc        | PWY-6593: sulfoacetate degradation                                                     |          |
| 2558669878 | DRAFT_00546 | Metacyc        | PWY-6733: sporopollenin precursor biosynthesis                                         |          |
| 2558669878 | DRAFT_00546 | Metacyc        | CARNMET-PWY: carnitine degradation I                                                   |          |
| 2558669878 | DRAFT_00546 | Metacyc        | PWY-6457: <i>trans</i>-cinnamoyl-CoA biosynthesis                                      |          |
| 2558669878 | DRAFT_00546 | Metacyc        | PWY-735: jasmonic acid biosynthesis                                                    |          |
| 2558669878 | DRAFT_00546 | Metacyc        | PWY-5140: cannabinoid biosynthesis                                                     |          |
| 2558669878 | DRAFT_00546 | Metacyc        | PWYG-321: mycolate biosynthesis                                                        |          |
| 2558669878 | DRAFT_00546 | Metacyc        | PWY-6799: fatty acid biosynthesis (plant mitochondria)                                 |          |
| 2558669878 | DRAFT_00546 | Metacyc        | PWY66-388: fatty acid &alpha;-oxidation III                                            |          |
| 2558669878 | DRAFT_00546 | Metacyc        | PWY-6048: methylthiopropionate degradation I (cleavage)                                |          |
| 2558669878 | DRAFT_00546 | Metacyc        | PWY-7064: 3-amino-3-phenylpropanoyl-CoA formation (Taxol 13C-side chain biosynthesis)  |          |
| 2558669878 | DRAFT_00546 | Metacyc        | PWY-6670: citronellol degradation                                                      |          |

|            |             |                |                                                                  |          |
|------------|-------------|----------------|------------------------------------------------------------------|----------|
| 2558669878 | DRAFT_00546 | COG_category   | [Q] Secondary metabolites biosynthesis, transport and catabolism |          |
| 2558669878 | DRAFT_00546 | COG_category   | [I] Lipid transport and metabolism                               |          |
| 2558669878 | DRAFT_00546 | COG0318        | Acyl-CoA synthetases (AMP-forming)/AMP-acid ligases II           | 3.00E-98 |
| 2558669878 | DRAFT_00546 | pfam00501      | AMP-binding                                                      | 7.40E-69 |
| 2558669878 | DRAFT_00546 | pfam13193      | AMP-binding_C                                                    | 1.30E-15 |
| 2558669878 | DRAFT_00546 | EC:6.2.1.-     | Ligases. Forming carbon-sulfur bonds. Acid--thiol ligases.       |          |
| 2558669878 | DRAFT_00546 | KO:K00666      | fatty-acyl-CoA synthase [EC:6.2.1.-]                             | 0.00E+00 |
| 2558669878 | DRAFT_00546 | Locus_type     | CDS                                                              |          |
| 2558669878 | DRAFT_00546 | Product_name   | Acyl-CoA synthetases (AMP-forming)/AMP-acid ligases II           |          |
| 2558669878 | DRAFT_00546 | Scaffold       | DRAFT_contig_70_42_len_53196_read_count_896652.7                 |          |
| 2558669878 | DRAFT_00546 | Coordinates    | 38020..39453(+)                                                  |          |
| 2558669878 | DRAFT_00546 | DNA_length     | 1434bp                                                           |          |
| 2558669878 | DRAFT_00546 | Protein_length | 477aa                                                            |          |
| 2558669878 | DRAFT_00546 | GC             |                                                                  | 0.48     |
| 2558669879 | DRAFT_00547 | KEGG_module    | M00082: Fatty acid biosynthesis, initiation                      |          |
| 2558669879 | DRAFT_00547 | KEGG_module    | M00083: Fatty acid biosynthesis, elongation                      |          |
| 2558669879 | DRAFT_00547 | Metacyc        | PWY-6519: 7-keto-8-aminopelargonate biosynthesis I               |          |
| 2558669879 | DRAFT_00547 | Metacyc        | PWY-4381: fatty acid biosynthesis initiation I                   |          |
| 2558669879 | DRAFT_00547 | COG_category   | [I] Lipid transport and metabolism                               |          |
| 2558669879 | DRAFT_00547 | COG0332        | 3-oxoacyl-[acyl-carrier-protein] synthase III                    | 5.00E-25 |
| 2558669879 | DRAFT_00547 | pfam08545      | ACP_syn_III                                                      | 2.00E-06 |
| 2558669879 | DRAFT_00547 | pfam08541      | ACP_syn_III_C                                                    | 8.90E-15 |
| 2558669879 | DRAFT_00547 | EC:2.3.1.180   | Beta-ketoacyl-[acyl-carrier-protein] synthase III.               |          |
| 2558669879 | DRAFT_00547 | KO:K00648      | 3-oxoacyl-[acyl-carrier-protein] synthase III [EC:2.3.1.180]     | 0.00E+00 |
| 2558669879 | DRAFT_00547 | Locus_type     | CDS                                                              |          |
| 2558669879 | DRAFT_00547 | Product_name   | 3-oxoacyl-[acyl-carrier-protein] synthase III                    |          |
| 2558669879 | DRAFT_00547 | Scaffold       | DRAFT_contig_70_42_len_53196_read_count_896652.7                 |          |
| 2558669879 | DRAFT_00547 | Coordinates    | 39434..40435(+)                                                  |          |
| 2558669879 | DRAFT_00547 | DNA_length     | 1002bp                                                           |          |
| 2558669879 | DRAFT_00547 | Protein_length | 333aa                                                            |          |
| 2558669879 | DRAFT_00547 | GC             |                                                                  | 0.49     |
| 2558669879 | DRAFT_00547 | Transmembrane  | Yes                                                              |          |

|            |             |                |                                                                                    |          |
|------------|-------------|----------------|------------------------------------------------------------------------------------|----------|
| 2558669880 | DRAFT_00548 | COG_category   | [R] General function prediction only                                               |          |
| 2558669880 | DRAFT_00548 | COG0596        | Predicted hydrolases or acyltransferases (alpha/beta hydrolase superfa             | 1.00E-30 |
| 2558669880 | DRAFT_00548 | pfam12697      | Abhydrolase_6                                                                      | 4.10E-34 |
| 2558669880 | DRAFT_00548 | Locus_type     | CDS                                                                                |          |
| 2558669880 | DRAFT_00548 | Product_name   | Predicted hydrolases or acyltransferases (alpha/beta hydrolase superi              |          |
| 2558669880 | DRAFT_00548 | Scaffold       | DRAFT_contig_70_42_len_53196_read_count_896652.7                                   |          |
| 2558669880 | DRAFT_00548 | Coordinates    | 40435..41280(+)                                                                    |          |
| 2558669880 | DRAFT_00548 | DNA_length     | 846bp                                                                              |          |
| 2558669880 | DRAFT_00548 | Protein_length | 281aa                                                                              |          |
| 2558669880 | DRAFT_00548 | GC             |                                                                                    | 0.5      |
|            |             |                |                                                                                    |          |
| 2558669881 | DRAFT_00549 | KEGG_module    | M00237: Branched-chain amino acid transport system                                 |          |
| 2558669881 | DRAFT_00549 | COG_category   | [E] Amino acid transport and metabolism                                            |          |
| 2558669881 | DRAFT_00549 | COG0410        | ABC-type branched-chain amino acid transport systems, ATPase compc                 | 2.00E-69 |
| 2558669881 | DRAFT_00549 | pfam00005      | ABC_tran                                                                           | 3.50E-27 |
| 2558669881 | DRAFT_00549 | KO:K01996      | branched-chain amino acid transport system ATP-binding protein                     | 0.00E+00 |
| 2558669881 | DRAFT_00549 | ITERM:06079    | amino acid/amide ABC transporter ATP-binding protein 2, HAAT family (TC 3.A.1.4.-) |          |
| 2558669881 | DRAFT_00549 | Locus_type     | CDS                                                                                |          |
| 2558669881 | DRAFT_00549 | Product_name   | amino acid/amide ABC transporter ATP-binding protein 2, HAAT famil                 |          |
| 2558669881 | DRAFT_00549 | Scaffold       | DRAFT_contig_70_42_len_53196_read_count_896652.7                                   |          |
| 2558669881 | DRAFT_00549 | Coordinates    | 41368..42078(-)                                                                    |          |
| 2558669881 | DRAFT_00549 | DNA_length     | 711bp                                                                              |          |
| 2558669881 | DRAFT_00549 | Protein_length | 236aa                                                                              |          |
| 2558669881 | DRAFT_00549 | GC             |                                                                                    | 0.56     |
|            |             |                |                                                                                    |          |
| 2558669882 | DRAFT_00550 | KEGG_module    | M00237: Branched-chain amino acid transport system                                 |          |
| 2558669882 | DRAFT_00550 | COG_category   | [E] Amino acid transport and metabolism                                            |          |
| 2558669882 | DRAFT_00550 | COG0411        | ABC-type branched-chain amino acid transport systems, ATPase compc                 | 2.00E-71 |
| 2558669882 | DRAFT_00550 | pfam00005      | ABC_tran                                                                           | 2.00E-25 |
| 2558669882 | DRAFT_00550 | pfam12399      | BCA_ABC_TP_C                                                                       | 2.60E-08 |
| 2558669882 | DRAFT_00550 | KO:K01995      | branched-chain amino acid transport system ATP-binding protein                     | 0.00E+00 |
| 2558669882 | DRAFT_00550 | ITERM:06078    | amino acid/amide ABC transporter ATP-binding protein 1, HAAT family (TC 3.A.1.4.-) |          |
| 2558669882 | DRAFT_00550 | Locus_type     | CDS                                                                                |          |
| 2558669882 | DRAFT_00550 | Product_name   | amino acid/amide ABC transporter ATP-binding protein 1, HAAT famil                 |          |

|            |             |                |                                                                               |
|------------|-------------|----------------|-------------------------------------------------------------------------------|
| 2558669882 | DRAFT_00550 | Scaffold       | DRAFT_contig_70_42_len_53196_read_count_896652.7                              |
| 2558669882 | DRAFT_00550 | Coordinates    | 42075..42848(-)                                                               |
| 2558669882 | DRAFT_00550 | DNA_length     | 774bp                                                                         |
| 2558669882 | DRAFT_00550 | Protein_length | 257aa                                                                         |
| 2558669882 | DRAFT_00550 | GC             | 0.6                                                                           |
| 2558669883 | DRAFT_00551 | COG_category   | [E] Amino acid transport and metabolism                                       |
| 2558669883 | DRAFT_00551 | COG4177        | ABC-type branched-chain amino acid transport system, permease com  3.00E-18   |
| 2558669883 | DRAFT_00551 | pfam02653      | BPD_transp_2 1.40E-28                                                         |
| 2558669883 | DRAFT_00551 | Locus_type     | CDS                                                                           |
| 2558669883 | DRAFT_00551 | Product_name   | ABC-type branched-chain amino acid transport system, permease con             |
| 2558669883 | DRAFT_00551 | Scaffold       | DRAFT_contig_70_42_len_53196_read_count_896652.7                              |
| 2558669883 | DRAFT_00551 | Coordinates    | 42849..44063(-)                                                               |
| 2558669883 | DRAFT_00551 | DNA_length     | 1215bp                                                                        |
| 2558669883 | DRAFT_00551 | Protein_length | 404aa                                                                         |
| 2558669883 | DRAFT_00551 | GC             | 0.58                                                                          |
| 2558669883 | DRAFT_00551 | Transmembrane  | Yes                                                                           |
| 2558669884 | DRAFT_00552 | KEGG_module    | M00237: Branched-chain amino acid transport system                            |
| 2558669884 | DRAFT_00552 | COG_category   | [E] Amino acid transport and metabolism                                       |
| 2558669884 | DRAFT_00552 | COG0559        | Branched-chain amino acid ABC-type transport system, permease com  4.00E-33   |
| 2558669884 | DRAFT_00552 | pfam02653      | BPD_transp_2 1.40E-31                                                         |
| 2558669884 | DRAFT_00552 | KO:K01997      | branched-chain amino acid transport system permease protein 0.00E+00          |
| 2558669884 | DRAFT_00552 | Locus_type     | CDS                                                                           |
| 2558669884 | DRAFT_00552 | Product_name   | Branched-chain amino acid ABC-type transport system, permease cor             |
| 2558669884 | DRAFT_00552 | Scaffold       | DRAFT_contig_70_42_len_53196_read_count_896652.7                              |
| 2558669884 | DRAFT_00552 | Coordinates    | 44065..44934(-)                                                               |
| 2558669884 | DRAFT_00552 | DNA_length     | 870bp                                                                         |
| 2558669884 | DRAFT_00552 | Protein_length | 289aa                                                                         |
| 2558669884 | DRAFT_00552 | GC             | 0.58                                                                          |
| 2558669884 | DRAFT_00552 | Transmembrane  | Yes                                                                           |
| 2558669885 | DRAFT_00553 | COG_category   | [E] Amino acid transport and metabolism                                       |
| 2558669885 | DRAFT_00553 | COG0683        | ABC-type branched-chain amino acid transport systems, periplasmic co 2.00E-27 |

|            |             |                |                                                                        |          |
|------------|-------------|----------------|------------------------------------------------------------------------|----------|
| 2558669885 | DRAFT_00553 | pfam13458      | Peripla_BP_6                                                           | 9.60E-41 |
| 2558669885 | DRAFT_00553 | Locus_type     | CDS                                                                    |          |
| 2558669885 | DRAFT_00553 | Product_name   | ABC-type branched-chain amino acid transport systems, periplasmic c    |          |
| 2558669885 | DRAFT_00553 | Scaffold       | DRAFT_contig_70_42_len_53196_read_count_896652.7                       |          |
| 2558669885 | DRAFT_00553 | Coordinates    | 44986..46941(-)                                                        |          |
| 2558669885 | DRAFT_00553 | DNA_length     | 1956bp                                                                 |          |
| 2558669885 | DRAFT_00553 | Protein_length | 651aa                                                                  |          |
| 2558669885 | DRAFT_00553 | GC             |                                                                        | 0.55     |
| 2558669885 | DRAFT_00553 | Transmembrane  | Yes                                                                    |          |
| 2558669886 | DRAFT_00554 | COG_category   | [R] General function prediction only                                   |          |
| 2558669886 | DRAFT_00554 | COG0596        | Predicted hydrolases or acyltransferases (alpha/beta hydrolase superfa | 4.00E-25 |
| 2558669886 | DRAFT_00554 | pfam12697      | Abhydrolase_6                                                          | 1.10E-40 |
| 2558669886 | DRAFT_00554 | Locus_type     | CDS                                                                    |          |
| 2558669886 | DRAFT_00554 | Product_name   | Predicted hydrolases or acyltransferases (alpha/beta hydrolase superi  |          |
| 2558669886 | DRAFT_00554 | Scaffold       | DRAFT_contig_70_42_len_53196_read_count_896652.7                       |          |
| 2558669886 | DRAFT_00554 | Coordinates    | 47169..47924(+)                                                        |          |
| 2558669886 | DRAFT_00554 | DNA_length     | 756bp                                                                  |          |
| 2558669886 | DRAFT_00554 | Protein_length | 251aa                                                                  |          |
| 2558669886 | DRAFT_00554 | GC             |                                                                        | 0.6      |
| 2558669887 | DRAFT_00555 | COG_category   | [I] Lipid transport and metabolism                                     |          |
| 2558669887 | DRAFT_00555 | COG2030        | Acyl dehydratase                                                       | 2.00E-33 |
| 2558669887 | DRAFT_00555 | pfam01575      | MaoC_dehydratas                                                        | 3.50E-32 |
| 2558669887 | DRAFT_00555 | Locus_type     | CDS                                                                    |          |
| 2558669887 | DRAFT_00555 | Product_name   | Acyl dehydratase                                                       |          |
| 2558669887 | DRAFT_00555 | Scaffold       | DRAFT_contig_70_42_len_53196_read_count_896652.7                       |          |
| 2558669887 | DRAFT_00555 | Coordinates    | 47939..48367(+)                                                        |          |
| 2558669887 | DRAFT_00555 | DNA_length     | 429bp                                                                  |          |
| 2558669887 | DRAFT_00555 | Protein_length | 142aa                                                                  |          |
| 2558669887 | DRAFT_00555 | GC             |                                                                        | 0.57     |
| 2558669888 | DRAFT_00556 | IMG_pathway    | 1014: Dicarboxylate/4-hydroxybutyrate cycle                            |          |
| 2558669888 | DRAFT_00556 | IMG_pathway    | 222: L-isoleucine degradation to propionyl-CoA and acetyl-CoA          |          |

|            |             |                |                                                              |          |
|------------|-------------|----------------|--------------------------------------------------------------|----------|
| 2558669888 | DRAFT_00556 | IMG_pathway    | 369: Pyruvate conversion to butyrate                         |          |
| 2558669888 | DRAFT_00556 | IMG_pathway    | 389: Crotonyl-CoA conversion to acetate                      |          |
| 2558669888 | DRAFT_00556 | IMG_pathway    | 596: 3-hydroxypropionate/4-hydroxybutyrate cycle             |          |
| 2558669888 | DRAFT_00556 | IMG_pathway    | 962: Glyoxylate from acetyl-CoA via ethylmalonyl-CoA pathway |          |
| 2558669888 | DRAFT_00556 | COG_category   | [l] Lipid transport and metabolism                           |          |
| 2558669888 | DRAFT_00556 | COG1250        | 3-hydroxyacyl-CoA dehydrogenase                              | 2.00E-91 |
| 2558669888 | DRAFT_00556 | pfam00725      | 3HCDH                                                        | 2.00E-36 |
| 2558669888 | DRAFT_00556 | pfam02737      | 3HCDH_N                                                      | 7.80E-59 |
| 2558669888 | DRAFT_00556 | EC:1.1.1.157   | 3-hydroxybutyryl-CoA dehydrogenase.                          |          |
| 2558669888 | DRAFT_00556 | KO:K00074      | 3-hydroxybutyryl-CoA dehydrogenase [EC:1.1.1.157]            | 0.00E+00 |
| 2558669888 | DRAFT_00556 | ITERM:00577    | 3-hydroxyacyl-CoA dehydrogenase (EC 1.1.1.35)                |          |
| 2558669888 | DRAFT_00556 | Locus_type     | CDS                                                          |          |
| 2558669888 | DRAFT_00556 | Product_name   | 3-hydroxyacyl-CoA dehydrogenase (EC 1.1.1.35)                |          |
| 2558669888 | DRAFT_00556 | Scaffold       | DRAFT_contig_70_42_len_53196_read_count_896652.7             |          |
| 2558669888 | DRAFT_00556 | Coordinates    | 48457..49350(-)                                              |          |
| 2558669888 | DRAFT_00556 | DNA_length     | 894bp                                                        |          |
| 2558669888 | DRAFT_00556 | Protein_length | 297aa                                                        |          |
| 2558669888 | DRAFT_00556 | GC             |                                                              | 0.57     |
| 2558669889 | DRAFT_00557 | pfam00583      | Acetyltransf_1                                               | 7.70E-10 |
| 2558669889 | DRAFT_00557 | Locus_type     | CDS                                                          |          |
| 2558669889 | DRAFT_00557 | Product_name   | Predicted acetyltransferase                                  |          |
| 2558669889 | DRAFT_00557 | Scaffold       | DRAFT_contig_70_42_len_53196_read_count_896652.7             |          |
| 2558669889 | DRAFT_00557 | Coordinates    | 49376..50233(-)                                              |          |
| 2558669889 | DRAFT_00557 | DNA_length     | 858bp                                                        |          |
| 2558669889 | DRAFT_00557 | Protein_length | 285aa                                                        |          |
| 2558669889 | DRAFT_00557 | GC             |                                                              | 0.57     |
| 2558669890 | DRAFT_00558 | Locus_type     | tRNA                                                         |          |
| 2558669890 | DRAFT_00558 | Product_name   | tRNA_Ser_TGA                                                 |          |
| 2558669890 | DRAFT_00558 | Scaffold       | DRAFT_contig_70_42_len_53196_read_count_896652.7             |          |
| 2558669890 | DRAFT_00558 | Coordinates    | 50372..50466(+)                                              |          |
| 2558669890 | DRAFT_00558 | DNA_length     | 85bp                                                         |          |
| 2558669890 | DRAFT_00558 | GC             |                                                              | 0.67     |

|            |             |                |                                                                                        |          |
|------------|-------------|----------------|----------------------------------------------------------------------------------------|----------|
| 2558669891 | DRAFT_00559 | COG_category   | [O] Posttranslational modification, protein turnover, chaperones                       |          |
| 2558669891 | DRAFT_00559 | COG0425        | Predicted redox protein, regulator of disulfide bond formation                         | 2.00E-07 |
| 2558669891 | DRAFT_00559 | pfam01206      | TusA                                                                                   | 2.70E-10 |
| 2558669891 | DRAFT_00559 | Locus_type     | CDS                                                                                    |          |
| 2558669891 | DRAFT_00559 | Product_name   | Predicted redox protein, regulator of disulfide bond formation                         |          |
| 2558669891 | DRAFT_00559 | Scaffold       | DRAFT_contig_70_42_len_53196_read_count_896652.7                                       |          |
| 2558669891 | DRAFT_00559 | Coordinates    | 50668..51309(+)                                                                        |          |
| 2558669891 | DRAFT_00559 | DNA_length     | 642bp                                                                                  |          |
| 2558669891 | DRAFT_00559 | Protein_length | 213aa                                                                                  |          |
| 2558669891 | DRAFT_00559 | GC             |                                                                                        | 0.6      |
| 2558669892 | DRAFT_00560 | KEGG_module    | M00373: Ethylmalonyl pathway                                                           |          |
| 2558669892 | DRAFT_00560 | KEGG_module    | M00095: C5 isoprenoid biosynthesis, mevalonate pathway                                 |          |
| 2558669892 | DRAFT_00560 | KEGG_module    | M00375: Hydroxypropionate-hydroxybutylate cycle                                        |          |
| 2558669892 | DRAFT_00560 | KEGG_module    | M00374: Dicarboxylate-hydroxybutyrate cycle                                            |          |
| 2558669892 | DRAFT_00560 | KEGG_module    | M00088: Ketone body biosynthesis, acetyl-CoA => acetoacetate/3-hydroxybutyrate/acetone |          |
| 2558669892 | DRAFT_00560 | Metacyc        | PWY1-3: polyhydroxybutyrate biosynthesis                                               |          |
| 2558669892 | DRAFT_00560 | Metacyc        | PWY-6883: pyruvate fermentation to butanol II                                          |          |
| 2558669892 | DRAFT_00560 | Metacyc        | PWY-6863: pyruvate fermentation to hexanol                                             |          |
| 2558669892 | DRAFT_00560 | Metacyc        | PWY-5177: glutaryl-CoA degradation                                                     |          |
| 2558669892 | DRAFT_00560 | Metacyc        | CENTFERM-PWY: pyruvate fermentation to butanoate                                       |          |
| 2558669892 | DRAFT_00560 | Metacyc        | PWY-6876: isopropanol biosynthesis                                                     |          |
| 2558669892 | DRAFT_00560 | Metacyc        | PWY-5676: acetyl-CoA fermentation to butyrate II                                       |          |
| 2558669892 | DRAFT_00560 | Metacyc        | PWY-6174: mevalonate pathway II (archaea)                                              |          |
| 2558669892 | DRAFT_00560 | Metacyc        | P163-PWY: lysine fermentation to acetate and butyrate                                  |          |
| 2558669892 | DRAFT_00560 | Metacyc        | ILEUDEG-PWY: isoleucine degradation I                                                  |          |
| 2558669892 | DRAFT_00560 | Metacyc        | ACETOACETATE-DEG-PWY: acetoacetate degradation (to acetyl CoA)                         |          |
| 2558669892 | DRAFT_00560 | Metacyc        | PWY-922: mevalonate pathway I                                                          |          |
| 2558669892 | DRAFT_00560 | Metacyc        | PWY-7003: glycerol degradation to butanol                                              |          |
| 2558669892 | DRAFT_00560 | Metacyc        | PWY-5741: ethylmalonyl pathway                                                         |          |
| 2558669892 | DRAFT_00560 | Metacyc        | PWY-6583: pyruvate fermentation to butanol I                                           |          |
| 2558669892 | DRAFT_00560 | Metacyc        | PWY66-368: ketolysis                                                                   |          |
| 2558669892 | DRAFT_00560 | Metacyc        | PWY66-367: ketogenesis                                                                 |          |



|            |             |                |                                                       |           |
|------------|-------------|----------------|-------------------------------------------------------|-----------|
| 2558669892 | DRAFT_00560 | Metacyc        | PWY-5789: 3-hydroxypropionate/4-hydroxybutyrate cycle |           |
| 2558669892 | DRAFT_00560 | Metacyc        | PWY-5109: 2-methylbutyrate biosynthesis               |           |
| 2558669892 | DRAFT_00560 | Metacyc        | PWY-6588: pyruvate fermentation to acetone            |           |
| 2558669892 | DRAFT_00560 | COG_category   | [I] Lipid transport and metabolism                    |           |
| 2558669892 | DRAFT_00560 | COG0183        | Acetyl-CoA acetyltransferase                          | 5.00E-86  |
| 2558669892 | DRAFT_00560 | pfam02803      | Thiolase_C                                            | 2.50E-43  |
| 2558669892 | DRAFT_00560 | pfam00108      | Thiolase_N                                            | 4.40E-84  |
| 2558669892 | DRAFT_00560 | pfam00108      | Thiolase_N                                            | 3.80E-08  |
| 2558669892 | DRAFT_00560 | EC:2.3.1.9     | Acetyl-CoA C-acetyltransferase.                       |           |
| 2558669892 | DRAFT_00560 | TIGR01930      | acetyl-CoA acetyltransferases                         | 1.30E-129 |
| 2558669892 | DRAFT_00560 | KO:K00626      | acetyl-CoA C-acetyltransferase [EC:2.3.1.9]           | 0.00E+00  |
| 2558669892 | DRAFT_00560 | Locus_type     | CDS                                                   |           |
| 2558669892 | DRAFT_00560 | Product_name   | acetyl-CoA acetyltransferase (EC 2.3.1.9)             |           |
| 2558669892 | DRAFT_00560 | Scaffold       | DRAFT_contig_70_42_len_53196_read_count_896652.7      |           |
| 2558669892 | DRAFT_00560 | Coordinates    | 51398..52690(+)                                       |           |
| 2558669892 | DRAFT_00560 | DNA_length     | 1293bp                                                |           |
| 2558669892 | DRAFT_00560 | Protein_length | 430aa                                                 |           |
| 2558669892 | DRAFT_00560 | GC             |                                                       | 0.54      |
| 2558669893 | DRAFT_00561 | pfam00696      | AA_kinase                                             | 1.10E-18  |
| 2558669893 | DRAFT_00561 | TIGR00746      | carbamate kinase                                      | 3.00E-63  |
| 2558669893 | DRAFT_00561 | Locus_type     | CDS                                                   |           |
| 2558669893 | DRAFT_00561 | Product_name   | Carbamate kinase                                      |           |
| 2558669893 | DRAFT_00561 | Scaffold       | DRAFT_contig_70_42_len_53196_read_count_896652.7      |           |
| 2558669893 | DRAFT_00561 | Coordinates    | 52709..53194(-)                                       |           |
| 2558669893 | DRAFT_00561 | DNA_length     | 486bp                                                 |           |
| 2558669893 | DRAFT_00561 | Protein_length | 161aa                                                 |           |
| 2558669893 | DRAFT_00561 | GC             |                                                       | 0.61      |
| 2558669894 | DRAFT_00562 | Locus_type     | tRNA                                                  |           |
| 2558669894 | DRAFT_00562 | Product_name   | tRNA_Undet_???                                        |           |
| 2558669894 | DRAFT_00562 | Scaffold       | DRAFT_contig_70_43_len_52827_read_count_999642.8      |           |
| 2558669894 | DRAFT_00562 | Coordinates    | 49..176(-)                                            |           |
| 2558669894 | DRAFT_00562 | DNA_length     | 128bp                                                 |           |

|            |             |                |                                                                           |          |
|------------|-------------|----------------|---------------------------------------------------------------------------|----------|
| 2558669894 | DRAFT_00562 | GC             |                                                                           | 0.64     |
| 2558669895 | DRAFT_00563 | pfam02511      | Thy1                                                                      | 2.20E-04 |
| 2558669895 | DRAFT_00563 | Locus_type     | CDS                                                                       |          |
| 2558669895 | DRAFT_00563 | Product_name   | Thymidylate synthase complementing protein                                |          |
| 2558669895 | DRAFT_00563 | Scaffold       | DRAFT_contig_70_43_len_52827_read_count_999642.8                          |          |
| 2558669895 | DRAFT_00563 | Coordinates    | 329..811(+)                                                               |          |
| 2558669895 | DRAFT_00563 | DNA_length     | 483bp                                                                     |          |
| 2558669895 | DRAFT_00563 | Protein_length | 160aa                                                                     |          |
| 2558669895 | DRAFT_00563 | GC             |                                                                           | 0.52     |
| 2558669896 | DRAFT_00564 | Metacyc        | PWY-6545: pyrimidine deoxyribonucleotides <i>de novo</i> biosynthesis III |          |
| 2558669896 | DRAFT_00564 | pfam02511      | Thy1                                                                      | 2.60E-48 |
| 2558669896 | DRAFT_00564 | EC:2.1.1.148   | Thymidylate synthase (FAD).                                               |          |
| 2558669896 | DRAFT_00564 | TIGR02170      | thymidylate synthase, flavin-dependent                                    | 1.80E-43 |
| 2558669896 | DRAFT_00564 | KO:K03465      | thymidylate synthase (FAD) [EC:2.1.1.148]                                 | 1.10E-33 |
| 2558669896 | DRAFT_00564 | Locus_type     | CDS                                                                       |          |
| 2558669896 | DRAFT_00564 | Product_name   | thymidylate synthase, flavin-dependent                                    |          |
| 2558669896 | DRAFT_00564 | Scaffold       | DRAFT_contig_70_43_len_52827_read_count_999642.8                          |          |
| 2558669896 | DRAFT_00564 | Coordinates    | 801..1331(+)                                                              |          |
| 2558669896 | DRAFT_00564 | DNA_length     | 531bp                                                                     |          |
| 2558669896 | DRAFT_00564 | Protein_length | 176aa                                                                     |          |
| 2558669896 | DRAFT_00564 | GC             |                                                                           | 0.54     |
| 2558669897 | DRAFT_00565 | COG_category   | [G] Carbohydrate transport and metabolism                                 |          |
| 2558669897 | DRAFT_00565 | COG1109        | Phosphomannomutase                                                        | 8.00E-80 |
| 2558669897 | DRAFT_00565 | pfam02879      | PGM_PMM_II                                                                | 1.70E-19 |
| 2558669897 | DRAFT_00565 | pfam02880      | PGM_PMM_III                                                               | 5.60E-05 |
| 2558669897 | DRAFT_00565 | pfam02878      | PGM_PMM_I                                                                 | 4.50E-29 |
| 2558669897 | DRAFT_00565 | pfam00408      | PGM_PMM_IV                                                                | 1.40E-11 |
| 2558669897 | DRAFT_00565 | Locus_type     | CDS                                                                       |          |
| 2558669897 | DRAFT_00565 | Product_name   | Phosphomannomutase                                                        |          |
| 2558669897 | DRAFT_00565 | Scaffold       | DRAFT_contig_70_43_len_52827_read_count_999642.8                          |          |
| 2558669897 | DRAFT_00565 | Coordinates    | 1335..2660(+)                                                             |          |

|            |             |                |                                                                         |           |
|------------|-------------|----------------|-------------------------------------------------------------------------|-----------|
| 2558669897 | DRAFT_00565 | DNA_length     | 1326bp                                                                  |           |
| 2558669897 | DRAFT_00565 | Protein_length | 441aa                                                                   |           |
| 2558669897 | DRAFT_00565 | GC             |                                                                         | 0.59      |
| 2558669898 | DRAFT_00566 | KEGG_module    | M00264: DNA polymerase II complex, archaea                              |           |
| 2558669898 | DRAFT_00566 | COG_category   | [L] Replication, recombination and repair                               |           |
| 2558669898 | DRAFT_00566 | COG1311        | Archaeal DNA polymerase II, small subunit/DNA polymerase delta, subunit | 6.00E-96  |
| 2558669898 | DRAFT_00566 | pfam04042      | DNA_pol_E_B                                                             | 1.60E-17  |
| 2558669898 | DRAFT_00566 | EC:2.7.7.7     | DNA-directed DNA polymerase.                                            |           |
| 2558669898 | DRAFT_00566 | KO:K02323      | DNA polymerase II small subunit [EC:2.7.7.7]                            | 0.00E+00  |
| 2558669898 | DRAFT_00566 | Locus_type     | CDS                                                                     |           |
| 2558669898 | DRAFT_00566 | Product_name   | Archaeal DNA polymerase II, small subunit/DNA polymerase delta, subunit |           |
| 2558669898 | DRAFT_00566 | Scaffold       | DRAFT_contig_70_43_len_52827_read_count_999642.8                        |           |
| 2558669898 | DRAFT_00566 | Coordinates    | 2682..4193(+)                                                           |           |
| 2558669898 | DRAFT_00566 | DNA_length     | 1512bp                                                                  |           |
| 2558669898 | DRAFT_00566 | Protein_length | 503aa                                                                   |           |
| 2558669898 | DRAFT_00566 | GC             |                                                                         | 0.55      |
| 2558669899 | DRAFT_00567 | COG_category   | [O] Posttranslational modification, protein turnover, chaperones        |           |
| 2558669899 | DRAFT_00567 | COG_category   | [L] Replication, recombination and repair                               |           |
| 2558669899 | DRAFT_00567 | COG1474        | Cdc6-related protein, AAA superfamily ATPase                            | 1.00E-82  |
| 2558669899 | DRAFT_00567 | pfam13401      | AAA_22                                                                  | 1.90E-09  |
| 2558669899 | DRAFT_00567 | pfam09079      | Cdc6_C                                                                  | 2.20E-19  |
| 2558669899 | DRAFT_00567 | TIGR02928      | orc1/cdc6 family replication initiation protein                         | 3.90E-117 |
| 2558669899 | DRAFT_00567 | KO:K10725      | archaeal cell division control protein 6                                | 0.00E+00  |
| 2558669899 | DRAFT_00567 | Locus_type     | CDS                                                                     |           |
| 2558669899 | DRAFT_00567 | Product_name   | orc1/cdc6 family replication initiation protein                         |           |
| 2558669899 | DRAFT_00567 | Scaffold       | DRAFT_contig_70_43_len_52827_read_count_999642.8                        |           |
| 2558669899 | DRAFT_00567 | Coordinates    | 4190..5383(-)                                                           |           |
| 2558669899 | DRAFT_00567 | DNA_length     | 1194bp                                                                  |           |
| 2558669899 | DRAFT_00567 | Protein_length | 397aa                                                                   |           |
| 2558669899 | DRAFT_00567 | GC             |                                                                         | 0.54      |
| 2558669900 | DRAFT_00568 | pfam03965      | Penicillinase_R                                                         | 9.00E-07  |

|            |             |                |                                                  |      |
|------------|-------------|----------------|--------------------------------------------------|------|
| 2558669900 | DRAFT_00568 | Locus_type     | CDS                                              |      |
| 2558669900 | DRAFT_00568 | Product_name   | Penicillinase repressor                          |      |
| 2558669900 | DRAFT_00568 | Scaffold       | DRAFT_contig_70_43_len_52827_read_count_999642.8 |      |
| 2558669900 | DRAFT_00568 | Coordinates    | 5901..6299(+)                                    |      |
| 2558669900 | DRAFT_00568 | DNA_length     | 399bp                                            |      |
| 2558669900 | DRAFT_00568 | Protein_length | 132aa                                            |      |
| 2558669900 | DRAFT_00568 | GC             |                                                  | 0.51 |
|            |             |                |                                                  |      |
| 2558669901 | DRAFT_00569 | Locus_type     | CDS                                              |      |
| 2558669901 | DRAFT_00569 | Product_name   | hypothetical protein                             |      |
| 2558669901 | DRAFT_00569 | Scaffold       | DRAFT_contig_70_43_len_52827_read_count_999642.8 |      |
| 2558669901 | DRAFT_00569 | Coordinates    | 6281..6829(-)                                    |      |
| 2558669901 | DRAFT_00569 | DNA_length     | 549bp                                            |      |
| 2558669901 | DRAFT_00569 | Protein_length | 182aa                                            |      |
| 2558669901 | DRAFT_00569 | GC             |                                                  | 0.47 |
| 2558669901 | DRAFT_00569 | Transmembrane  | Yes                                              |      |
|            |             |                |                                                  |      |
| 2558669902 | DRAFT_00570 | Locus_type     | CDS                                              |      |
| 2558669902 | DRAFT_00570 | Product_name   | hypothetical protein                             |      |
| 2558669902 | DRAFT_00570 | Scaffold       | DRAFT_contig_70_43_len_52827_read_count_999642.8 |      |
| 2558669902 | DRAFT_00570 | Coordinates    | 6878..7234(-)                                    |      |
| 2558669902 | DRAFT_00570 | DNA_length     | 357bp                                            |      |
| 2558669902 | DRAFT_00570 | Protein_length | 118aa                                            |      |
| 2558669902 | DRAFT_00570 | GC             |                                                  | 0.43 |
|            |             |                |                                                  |      |
| 2558669903 | DRAFT_00571 | Locus_type     | CDS                                              |      |
| 2558669903 | DRAFT_00571 | Product_name   | hypothetical protein                             |      |
| 2558669903 | DRAFT_00571 | Scaffold       | DRAFT_contig_70_43_len_52827_read_count_999642.8 |      |
| 2558669903 | DRAFT_00571 | Coordinates    | 7504..7680(+)                                    |      |
| 2558669903 | DRAFT_00571 | DNA_length     | 177bp                                            |      |
| 2558669903 | DRAFT_00571 | Protein_length | 58aa                                             |      |
| 2558669903 | DRAFT_00571 | GC             |                                                  | 0.49 |
|            |             |                |                                                  |      |
| 2558669904 | DRAFT_00572 | Metacyc        | PWY-6834: spermidine biosynthesis III            |      |

|            |             |              |                                                                                                  |          |
|------------|-------------|--------------|--------------------------------------------------------------------------------------------------|----------|
| 2558669904 | DRAFT_00572 | Metacyc      | PWY-5135: xanthohumol biosynthesis                                                               |          |
| 2558669904 | DRAFT_00572 | Metacyc      | PWY-7169: hyperxanthone E biosynthesis                                                           |          |
| 2558669904 | DRAFT_00572 | Metacyc      | PWY-5132: humulone biosynthesis                                                                  |          |
| 2558669904 | DRAFT_00572 | Metacyc      | PWY-6403: carrageenan biosynthesis                                                               |          |
| 2558669904 | DRAFT_00572 | Metacyc      | PWY-5365: linear furanocoumarin biosynthesis                                                     |          |
| 2558669904 | DRAFT_00572 | Metacyc      | PWY-5027: phylloquinol biosynthesis                                                              |          |
| 2558669904 | DRAFT_00572 | Metacyc      | PWY-6262: demethylmenaquinol-8 biosynthesis II                                                   |          |
| 2558669904 | DRAFT_00572 | Metacyc      | PWY-702: methionine biosynthesis II                                                              |          |
| 2558669904 | DRAFT_00572 | Metacyc      | PWY-5133: cohumulone biosynthesis                                                                |          |
| 2558669904 | DRAFT_00572 | Metacyc      | PWY-6681: neurosporaxanthin biosynthesis                                                         |          |
| 2558669904 | DRAFT_00572 | Metacyc      | PWY-5808: hyperforin and adhyperforin biosynthesis                                               |          |
| 2558669904 | DRAFT_00572 | Metacyc      | PWY-5817: dodecaprenyl diphosphate biosynthesis                                                  |          |
| 2558669904 | DRAFT_00572 | Metacyc      | PWY-2681: <i>trans</i> -zeatin biosynthesis                                                      |          |
| 2558669904 | DRAFT_00572 | Metacyc      | PWY-5802: alizarin biosynthesis                                                                  |          |
| 2558669904 | DRAFT_00572 | Metacyc      | PWY-5064: chlorophyll <i>a</i> biosynthesis II                                                   |          |
| 2558669904 | DRAFT_00572 | Metacyc      | PWY-4681: kievitone biosynthesis                                                                 |          |
| 2558669904 | DRAFT_00572 | Metacyc      | PWY-5068: chlorophyll cycle                                                                      |          |
| 2558669904 | DRAFT_00572 | Metacyc      | PWY-5893: tridecaprenyl diphosphate biosynthesis                                                 |          |
| 2558669904 | DRAFT_00572 | Metacyc      | PWY-5770: phenazine-1-carboxylate biosynthesis                                                   |          |
| 2558669904 | DRAFT_00572 | Metacyc      | PWY-4502: wighteone and luteone biosynthesis                                                     |          |
| 2558669904 | DRAFT_00572 | Metacyc      | PWY-6936: seleno-amino acid biosynthesis                                                         |          |
| 2558669904 | DRAFT_00572 | Metacyc      | PWY-5816: all <i>trans</i> undecaprenyl diphosphate biosynthesis                                 |          |
| 2558669904 | DRAFT_00572 | Metacyc      | PWY-6793: demethylmenaquinol-8 biosynthesis III                                                  |          |
| 2558669904 | DRAFT_00572 | COG_category | [R] General function prediction only                                                             |          |
| 2558669904 | DRAFT_00572 | COG1646      | Predicted phosphate-binding enzymes, TIM-barrel fold                                             | 1.00E-56 |
| 2558669904 | DRAFT_00572 | pfam01884    | PcrB                                                                                             | 1.10E-63 |
| 2558669904 | DRAFT_00572 | EC:2.5.1.-   | Transferases. Transferring alkyl or aryl groups, other than methyl groups. Transferring alkyl or |          |
| 2558669904 | DRAFT_00572 | TIGR01769    | phosphoglycerol geranylgeranyltransferase                                                        | 9.90E-71 |
| 2558669904 | DRAFT_00572 | TIGR01768    | geranylgeranylglyceryl phosphate synthase family protein                                         | 3.00E-63 |
| 2558669904 | DRAFT_00572 | KO:K07094    | putative glycerol-1-phosphate prenyltransferase [EC:2.5.1.-]                                     | 0.00E+00 |
| 2558669904 | DRAFT_00572 | Locus_type   | CDS                                                                                              |          |
| 2558669904 | DRAFT_00572 | Product_name | phosphoglycerol geranylgeranyltransferase                                                        |          |
| 2558669904 | DRAFT_00572 | Scaffold     | DRAFT_contig_70_43_len_52827_read_count_999642.8                                                 |          |
| 2558669904 | DRAFT_00572 | Coordinates  | 7682..8518(+)                                                                                    |          |

|            |             |                |                                                         |          |
|------------|-------------|----------------|---------------------------------------------------------|----------|
| 2558669904 | DRAFT_00572 | DNA_length     | 837bp                                                   |          |
| 2558669904 | DRAFT_00572 | Protein_length | 278aa                                                   |          |
| 2558669904 | DRAFT_00572 | GC             |                                                         | 0.52     |
| 2558669905 | DRAFT_00573 | KEGG_module    | M00264: DNA polymerase II complex, archaea              |          |
| 2558669905 | DRAFT_00573 | COG_category   | [L] Replication, recombination and repair               |          |
| 2558669905 | DRAFT_00573 | COG1933        | Archaeal DNA polymerase II, large subunit               | 5.00E-68 |
| 2558669905 | DRAFT_00573 | pfam03833      | PolC_DP2                                                | 0.00E+00 |
| 2558669905 | DRAFT_00573 | EC:2.7.7.7     | DNA-directed DNA polymerase.                            |          |
| 2558669905 | DRAFT_00573 | TIGR00354      | DNA polymerase, archaeal type II, large subunit         | 0.00E+00 |
| 2558669905 | DRAFT_00573 | KO:K02322      | DNA polymerase II large subunit [EC:2.7.7.7]            | 0.00E+00 |
| 2558669905 | DRAFT_00573 | ITERM:00108    | DNA polymerase II large subunit (EC 2.7.7.7)            |          |
| 2558669905 | DRAFT_00573 | Locus_type     | CDS                                                     |          |
| 2558669905 | DRAFT_00573 | Product_name   | DNA polymerase II large subunit (EC 2.7.7.7)            |          |
| 2558669905 | DRAFT_00573 | Scaffold       | DRAFT_contig_70_43_len_52827_read_count_999642.8        |          |
| 2558669905 | DRAFT_00573 | Coordinates    | 8577..12077(+)                                          |          |
| 2558669905 | DRAFT_00573 | DNA_length     | 3501bp                                                  |          |
| 2558669905 | DRAFT_00573 | Protein_length | 1166aa                                                  |          |
| 2558669905 | DRAFT_00573 | GC             |                                                         | 0.58     |
| 2558669906 | DRAFT_00574 | KEGG_module    | M00346: Formaldehyde assimilation, serine pathway       |          |
| 2558669906 | DRAFT_00574 | KEGG_module    | M00140: C1-unit interconversion, prokaryotes            |          |
| 2558669906 | DRAFT_00574 | KEGG_module    | M00141: C1-unit interconversion, eukaryotes             |          |
| 2558669906 | DRAFT_00574 | KEGG_module    | M00532: Photorespiration                                |          |
| 2558669906 | DRAFT_00574 | Metacyc        | PWY-5497: purine nucleobases degradation II (anaerobic) |          |
| 2558669906 | DRAFT_00574 | Metacyc        | PWY-2161: folate polyglutamylolation                    |          |
| 2558669906 | DRAFT_00574 | Metacyc        | PWY-3841: folate transformations II                     |          |
| 2558669906 | DRAFT_00574 | Metacyc        | PWY-2201: folate transformations I                      |          |
| 2558669906 | DRAFT_00574 | Metacyc        | GLYSYN-PWY: glycine biosynthesis I                      |          |
| 2558669906 | DRAFT_00574 | Metacyc        | PWY-3661: glycine betaine degradation                   |          |
| 2558669906 | DRAFT_00574 | Metacyc        | 1CMET2-PWY: formylTHF biosynthesis I                    |          |
| 2558669906 | DRAFT_00574 | Metacyc        | PWY-181: photorespiration                               |          |
| 2558669906 | DRAFT_00574 | Metacyc        | PWY-1622: formaldehyde assimilation I (serine pathway)  |          |
| 2558669906 | DRAFT_00574 | COG_category   | [E] Amino acid transport and metabolism                 |          |

|            |             |                |                                                                   |           |
|------------|-------------|----------------|-------------------------------------------------------------------|-----------|
| 2558669906 | DRAFT_00574 | COG0112        | Glycine/serine hydroxymethyltransferase                           | 5.00E-117 |
| 2558669906 | DRAFT_00574 | pfam00464      | SHMT                                                              | 1.30E-72  |
| 2558669906 | DRAFT_00574 | EC:2.1.2.1     | Glycine hydroxymethyltransferase.                                 |           |
| 2558669906 | DRAFT_00574 | KO:K00600      | glycine hydroxymethyltransferase [EC:2.1.2.1]                     | 0.00E+00  |
| 2558669906 | DRAFT_00574 | Locus_type     | CDS                                                               |           |
| 2558669906 | DRAFT_00574 | Product_name   | Glycine/serine hydroxymethyltransferase                           |           |
| 2558669906 | DRAFT_00574 | Scaffold       | DRAFT_contig_70_43_len_52827_read_count_999642.8                  |           |
| 2558669906 | DRAFT_00574 | Coordinates    | 12054..13343(-)                                                   |           |
| 2558669906 | DRAFT_00574 | DNA_length     | 1290bp                                                            |           |
| 2558669906 | DRAFT_00574 | Protein_length | 429aa                                                             |           |
| 2558669906 | DRAFT_00574 | GC             |                                                                   | 0.57      |
| 2558669907 | DRAFT_00575 | COG_category   | [U] Intracellular trafficking, secretion, and vesicular transport |           |
| 2558669907 | DRAFT_00575 | COG4023        | Preprotein translocase subunit Sec61beta                          | 3.00E-03  |
| 2558669907 | DRAFT_00575 | pfam03911      | Sec61_beta                                                        | 9.00E-13  |
| 2558669907 | DRAFT_00575 | Locus_type     | CDS                                                               |           |
| 2558669907 | DRAFT_00575 | Product_name   | Preprotein translocase subunit Sec61beta                          |           |
| 2558669907 | DRAFT_00575 | Scaffold       | DRAFT_contig_70_43_len_52827_read_count_999642.8                  |           |
| 2558669907 | DRAFT_00575 | Coordinates    | 13453..13626(+)                                                   |           |
| 2558669907 | DRAFT_00575 | DNA_length     | 174bp                                                             |           |
| 2558669907 | DRAFT_00575 | Protein_length | 57aa                                                              |           |
| 2558669907 | DRAFT_00575 | GC             |                                                                   | 0.51      |
| 2558669907 | DRAFT_00575 | Transmembrane  | Yes                                                               |           |
| 2558669908 | DRAFT_00576 | COG_category   | [S] Function unknown                                              |           |
| 2558669908 | DRAFT_00576 | COG3356        | Predicted membrane protein                                        | 1.00E-42  |
| 2558669908 | DRAFT_00576 | pfam09843      | DUF2070                                                           | 2.00E-28  |
| 2558669908 | DRAFT_00576 | Locus_type     | CDS                                                               |           |
| 2558669908 | DRAFT_00576 | Product_name   | Predicted membrane protein                                        |           |
| 2558669908 | DRAFT_00576 | Scaffold       | DRAFT_contig_70_43_len_52827_read_count_999642.8                  |           |
| 2558669908 | DRAFT_00576 | Coordinates    | 13601..15391(+)                                                   |           |
| 2558669908 | DRAFT_00576 | DNA_length     | 1791bp                                                            |           |
| 2558669908 | DRAFT_00576 | Protein_length | 596aa                                                             |           |
| 2558669908 | DRAFT_00576 | GC             |                                                                   | 0.57      |

|            |             |                |                                                                                     |          |
|------------|-------------|----------------|-------------------------------------------------------------------------------------|----------|
| 2558669908 | DRAFT_00576 | Transmembrane  | Yes                                                                                 |          |
| 2558669909 | DRAFT_00577 | KEGG_module    | M00053: Pyrimidine deoxyribonucleotide biosynthesis, CDP/CTP => dCDP/dCTP,dTDP/dTTP |          |
| 2558669909 | DRAFT_00577 | COG_category   | [F] Nucleotide transport and metabolism                                             |          |
| 2558669909 | DRAFT_00577 | COG0125        | Thymidylate kinase                                                                  | 2.00E-28 |
| 2558669909 | DRAFT_00577 | pfam02223      | Thymidylate_kin                                                                     | 4.80E-31 |
| 2558669909 | DRAFT_00577 | EC:2.7.4.9     | dTMP kinase.                                                                        |          |
| 2558669909 | DRAFT_00577 | TIGR00041      | thymidylate kinase                                                                  | 7.10E-29 |
| 2558669909 | DRAFT_00577 | KO:K00943      | dTMP kinase [EC:2.7.4.9]                                                            | 7.90E-39 |
| 2558669909 | DRAFT_00577 | Locus_type     | CDS                                                                                 |          |
| 2558669909 | DRAFT_00577 | Product_name   | thymidylate kinase                                                                  |          |
| 2558669909 | DRAFT_00577 | Scaffold       | DRAFT_contig_70_43_len_52827_read_count_999642.8                                    |          |
| 2558669909 | DRAFT_00577 | Coordinates    | 15428..16045(+)                                                                     |          |
| 2558669909 | DRAFT_00577 | DNA_length     | 618bp                                                                               |          |
| 2558669909 | DRAFT_00577 | Protein_length | 205aa                                                                               |          |
| 2558669909 | DRAFT_00577 | GC             |                                                                                     | 0.55     |
| 2558669910 | DRAFT_00578 | COG_category   | [R] General function prediction only                                                |          |
| 2558669910 | DRAFT_00578 | COG1078        | HD superfamily phosphohydrolases                                                    | 7.00E-70 |
| 2558669910 | DRAFT_00578 | pfam01966      | HD                                                                                  | 1.60E-11 |
| 2558669910 | DRAFT_00578 | Locus_type     | CDS                                                                                 |          |
| 2558669910 | DRAFT_00578 | Product_name   | HD superfamily phosphohydrolases                                                    |          |
| 2558669910 | DRAFT_00578 | Scaffold       | DRAFT_contig_70_43_len_52827_read_count_999642.8                                    |          |
| 2558669910 | DRAFT_00578 | Coordinates    | 16073..17368(+)                                                                     |          |
| 2558669910 | DRAFT_00578 | DNA_length     | 1296bp                                                                              |          |
| 2558669910 | DRAFT_00578 | Protein_length | 431aa                                                                               |          |
| 2558669910 | DRAFT_00578 | GC             |                                                                                     | 0.58     |
| 2558669911 | DRAFT_00579 | Locus_type     | CDS                                                                                 |          |
| 2558669911 | DRAFT_00579 | Product_name   | hypothetical protein                                                                |          |
| 2558669911 | DRAFT_00579 | Scaffold       | DRAFT_contig_70_43_len_52827_read_count_999642.8                                    |          |
| 2558669911 | DRAFT_00579 | Coordinates    | 17608..18267(-)                                                                     |          |
| 2558669911 | DRAFT_00579 | DNA_length     | 660bp                                                                               |          |
| 2558669911 | DRAFT_00579 | Protein_length | 219aa                                                                               |          |



|            |             |                |                                                  |           |
|------------|-------------|----------------|--------------------------------------------------|-----------|
| 2558669911 | DRAFT_00579 | GC             |                                                  | 0.58      |
| 2558669912 | DRAFT_00580 | Locus_type     | CDS                                              |           |
| 2558669912 | DRAFT_00580 | Product_name   | hypothetical protein                             |           |
| 2558669912 | DRAFT_00580 | Scaffold       | DRAFT_contig_70_43_len_52827_read_count_999642.8 |           |
| 2558669912 | DRAFT_00580 | Coordinates    | 18270..18872(+)                                  |           |
| 2558669912 | DRAFT_00580 | DNA_length     | 603bp                                            |           |
| 2558669912 | DRAFT_00580 | Protein_length | 200aa                                            |           |
| 2558669912 | DRAFT_00580 | GC             |                                                  | 0.55      |
| 2558669913 | DRAFT_00581 | Locus_type     | CDS                                              |           |
| 2558669913 | DRAFT_00581 | Product_name   | hypothetical protein                             |           |
| 2558669913 | DRAFT_00581 | Scaffold       | DRAFT_contig_70_43_len_52827_read_count_999642.8 |           |
| 2558669913 | DRAFT_00581 | Coordinates    | 18865..19263(-)                                  |           |
| 2558669913 | DRAFT_00581 | DNA_length     | 399bp                                            |           |
| 2558669913 | DRAFT_00581 | Protein_length | 132aa                                            |           |
| 2558669913 | DRAFT_00581 | GC             |                                                  | 0.55      |
| 2558669913 | DRAFT_00581 | Transmembrane  | Yes                                              |           |
| 2558669914 | DRAFT_00582 | Locus_type     | CDS                                              |           |
| 2558669914 | DRAFT_00582 | Product_name   | hypothetical protein                             |           |
| 2558669914 | DRAFT_00582 | Scaffold       | DRAFT_contig_70_43_len_52827_read_count_999642.8 |           |
| 2558669914 | DRAFT_00582 | Coordinates    | 19265..19471(-)                                  |           |
| 2558669914 | DRAFT_00582 | DNA_length     | 207bp                                            |           |
| 2558669914 | DRAFT_00582 | Protein_length | 68aa                                             |           |
| 2558669914 | DRAFT_00582 | GC             |                                                  | 0.48      |
| 2558669915 | DRAFT_00583 | COG_category   | [L] Replication, recombination and repair        |           |
| 2558669915 | DRAFT_00583 | COG0550        | Topoisomerase IA                                 | 1.00E-122 |
| 2558669915 | DRAFT_00583 | pfam01131      | Topoisom_bac                                     | 2.60E-95  |
| 2558669915 | DRAFT_00583 | pfam01751      | Toprim                                           | 9.00E-09  |
| 2558669915 | DRAFT_00583 | pfam01396      | zf-C4_Topoisom                                   | 6.90E-07  |
| 2558669915 | DRAFT_00583 | EC:5.99.1.2    | DNA topoisomerase.                               |           |
| 2558669915 | DRAFT_00583 | TIGR01057      | DNA topoisomerase I, archaeal                    | 0.00E+00  |

|            |             |                |                                                  |          |
|------------|-------------|----------------|--------------------------------------------------|----------|
| 2558669915 | DRAFT_00583 | KO:K03168      | DNA topoisomerase I [EC:5.99.1.2]                | 0.00E+00 |
| 2558669915 | DRAFT_00583 | ITERM:00090    | DNA topoisomerase I (EC 5.99.1.2)                |          |
| 2558669915 | DRAFT_00583 | Locus_type     | CDS                                              |          |
| 2558669915 | DRAFT_00583 | Product_name   | DNA topoisomerase I (EC 5.99.1.2)                |          |
| 2558669915 | DRAFT_00583 | Scaffold       | DRAFT_contig_70_43_len_52827_read_count_999642.8 |          |
| 2558669915 | DRAFT_00583 | Coordinates    | 19468..21558(-)                                  |          |
| 2558669915 | DRAFT_00583 | DNA_length     | 2091bp                                           |          |
| 2558669915 | DRAFT_00583 | Protein_length | 696aa                                            |          |
| 2558669915 | DRAFT_00583 | GC             |                                                  | 0.57     |
|            |             |                |                                                  |          |
| 2558669916 | DRAFT_00584 | Locus_type     | CDS                                              |          |
| 2558669916 | DRAFT_00584 | Product_name   | hypothetical protein                             |          |
| 2558669916 | DRAFT_00584 | Scaffold       | DRAFT_contig_70_43_len_52827_read_count_999642.8 |          |
| 2558669916 | DRAFT_00584 | Coordinates    | 21589..21765(-)                                  |          |
| 2558669916 | DRAFT_00584 | DNA_length     | 177bp                                            |          |
| 2558669916 | DRAFT_00584 | Protein_length | 58aa                                             |          |
| 2558669916 | DRAFT_00584 | GC             |                                                  | 0.52     |
|            |             |                |                                                  |          |
| 2558669917 | DRAFT_00585 | pfam01522      | Polysacc_deac_1                                  | 3.30E-13 |
| 2558669917 | DRAFT_00585 | Locus_type     | CDS                                              |          |
| 2558669917 | DRAFT_00585 | Product_name   | Predicted xylanase/chitin deacetylase            |          |
| 2558669917 | DRAFT_00585 | Scaffold       | DRAFT_contig_70_43_len_52827_read_count_999642.8 |          |
| 2558669917 | DRAFT_00585 | Coordinates    | 22042..22986(+)                                  |          |
| 2558669917 | DRAFT_00585 | DNA_length     | 945bp                                            |          |
| 2558669917 | DRAFT_00585 | Protein_length | 314aa                                            |          |
| 2558669917 | DRAFT_00585 | GC             |                                                  | 0.53     |
|            |             |                |                                                  |          |
| 2558669918 | DRAFT_00586 | pfam00132      | Hexapep                                          | 1.00E-08 |
| 2558669918 | DRAFT_00586 | Locus_type     | CDS                                              |          |
| 2558669918 | DRAFT_00586 | Product_name   | Bacterial transferase hexapeptide (six repeats)  |          |
| 2558669918 | DRAFT_00586 | Scaffold       | DRAFT_contig_70_43_len_52827_read_count_999642.8 |          |
| 2558669918 | DRAFT_00586 | Coordinates    | 22978..23442(-)                                  |          |
| 2558669918 | DRAFT_00586 | DNA_length     | 465bp                                            |          |
| 2558669918 | DRAFT_00586 | Protein_length | 154aa                                            |          |

|            |             |                |                                                                  |          |
|------------|-------------|----------------|------------------------------------------------------------------|----------|
| 2558669918 | DRAFT_00586 | GC             |                                                                  | 0.59     |
| 2558669918 | DRAFT_00586 | Transmembrane  | Yes                                                              |          |
| 2558669919 | DRAFT_00587 | COG_category   | [Q] Secondary metabolites biosynthesis, transport and catabolism |          |
| 2558669919 | DRAFT_00587 | COG3882        | Predicted enzyme involved in methoxymalonyl-ACP biosynthesis     | 0.00E+00 |
| 2558669919 | DRAFT_00587 | pfam13673      | Acetyltransf_10                                                  | 1.30E-08 |
| 2558669919 | DRAFT_00587 | TIGR01681      | HAD-superfamily phosphatase, subfamily IIIC                      | 2.00E-19 |
| 2558669919 | DRAFT_00587 | TIGR01686      | FkbH-like domain                                                 | 2.40E-95 |
| 2558669919 | DRAFT_00587 | Locus_type     | CDS                                                              |          |
| 2558669919 | DRAFT_00587 | Product_name   | HAD-superfamily phosphatase, subfamily IIIC/FkbH-like domain     |          |
| 2558669919 | DRAFT_00587 | Scaffold       | DRAFT_contig_70_43_len_52827_read_count_999642.8                 |          |
| 2558669919 | DRAFT_00587 | Coordinates    | 23526..25379(+)                                                  |          |
| 2558669919 | DRAFT_00587 | DNA_length     | 1854bp                                                           |          |
| 2558669919 | DRAFT_00587 | Protein_length | 617aa                                                            |          |
| 2558669919 | DRAFT_00587 | GC             |                                                                  | 0.54     |
| 2558669920 | DRAFT_00588 | KO:K02078      | acyl carrier protein                                             | 1.20E-10 |
| 2558669920 | DRAFT_00588 | Locus_type     | CDS                                                              |          |
| 2558669920 | DRAFT_00588 | Product_name   | hypothetical protein                                             |          |
| 2558669920 | DRAFT_00588 | Scaffold       | DRAFT_contig_70_43_len_52827_read_count_999642.8                 |          |
| 2558669920 | DRAFT_00588 | Coordinates    | 25385..25606(+)                                                  |          |
| 2558669920 | DRAFT_00588 | DNA_length     | 222bp                                                            |          |
| 2558669920 | DRAFT_00588 | Protein_length | 73aa                                                             |          |
| 2558669920 | DRAFT_00588 | GC             |                                                                  | 0.48     |
| 2558669921 | DRAFT_00589 | COG_category   | [I] Lipid transport and metabolism                               |          |
| 2558669921 | DRAFT_00589 | COG2030        | Acyl dehydratase                                                 | 1.00E-12 |
| 2558669921 | DRAFT_00589 | pfam01575      | MaoC_dehydratas                                                  | 5.20E-17 |
| 2558669921 | DRAFT_00589 | Locus_type     | CDS                                                              |          |
| 2558669921 | DRAFT_00589 | Product_name   | Acyl dehydratase                                                 |          |
| 2558669921 | DRAFT_00589 | Scaffold       | DRAFT_contig_70_43_len_52827_read_count_999642.8                 |          |
| 2558669921 | DRAFT_00589 | Coordinates    | 25603..26022(+)                                                  |          |
| 2558669921 | DRAFT_00589 | DNA_length     | 420bp                                                            |          |
| 2558669921 | DRAFT_00589 | Protein_length | 139aa                                                            |          |

|            |             |                |                                                            |          |
|------------|-------------|----------------|------------------------------------------------------------|----------|
| 2558669921 | DRAFT_00589 | GC             |                                                            | 0.53     |
| 2558669922 | DRAFT_00590 | Metacyc        | PWY-6012: acyl carrier protein metabolism                  |          |
| 2558669922 | DRAFT_00590 | COG_category   | [I] Lipid transport and metabolism                         |          |
| 2558669922 | DRAFT_00590 | COG0736        | Phosphopantetheinyl transferase (holo-ACP synthase)        | 2.00E-16 |
| 2558669922 | DRAFT_00590 | pfam01648      | ACPS                                                       | 3.00E-16 |
| 2558669922 | DRAFT_00590 | EC:2.7.8.7     | Holo-[acyl-carrier-protein] synthase.                      |          |
| 2558669922 | DRAFT_00590 | TIGR00516      | holo-[acyl-carrier-protein] synthase                       | 2.00E-19 |
| 2558669922 | DRAFT_00590 | TIGR00556      | phosphopantetheine--protein transferase domain             | 2.20E-25 |
| 2558669922 | DRAFT_00590 | KO:K00997      | holo-[acyl-carrier protein] synthase [EC:2.7.8.7]          | 1.20E-13 |
| 2558669922 | DRAFT_00590 | Locus_type     | CDS                                                        |          |
| 2558669922 | DRAFT_00590 | Product_name   | phosphopantetheine--protein transferase domain             |          |
| 2558669922 | DRAFT_00590 | Scaffold       | DRAFT_contig_70_43_len_52827_read_count_999642.8           |          |
| 2558669922 | DRAFT_00590 | Coordinates    | 26028..26411(-)                                            |          |
| 2558669922 | DRAFT_00590 | DNA_length     | 384bp                                                      |          |
| 2558669922 | DRAFT_00590 | Protein_length | 127aa                                                      |          |
| 2558669922 | DRAFT_00590 | GC             |                                                            | 0.5      |
| 2558669923 | DRAFT_00591 | Metacyc        | GLYCLEAV-PWY: glycine cleavage                             |          |
| 2558669923 | DRAFT_00591 | COG_category   | [E] Amino acid transport and metabolism                    |          |
| 2558669923 | DRAFT_00591 | COG0404        | Glycine cleavage system T protein (aminomethyltransferase) | 3.00E-93 |
| 2558669923 | DRAFT_00591 | pfam01571      | GCV_T                                                      | 5.30E-67 |
| 2558669923 | DRAFT_00591 | pfam08669      | GCV_T_C                                                    | 2.00E-15 |
| 2558669923 | DRAFT_00591 | EC:2.1.2.10    | Aminomethyltransferase.                                    |          |
| 2558669923 | DRAFT_00591 | TIGR00528      | glycine cleavage system T protein                          | 2.00E-98 |
| 2558669923 | DRAFT_00591 | KO:K00605      | aminomethyltransferase [EC:2.1.2.10]                       | 0.00E+00 |
| 2558669923 | DRAFT_00591 | Locus_type     | CDS                                                        |          |
| 2558669923 | DRAFT_00591 | Product_name   | glycine cleavage system T protein                          |          |
| 2558669923 | DRAFT_00591 | Scaffold       | DRAFT_contig_70_43_len_52827_read_count_999642.8           |          |
| 2558669923 | DRAFT_00591 | Coordinates    | 26564..27679(+)                                            |          |
| 2558669923 | DRAFT_00591 | DNA_length     | 1116bp                                                     |          |
| 2558669923 | DRAFT_00591 | Protein_length | 371aa                                                      |          |
| 2558669923 | DRAFT_00591 | GC             |                                                            | 0.58     |

|            |             |                |                                                                        |          |
|------------|-------------|----------------|------------------------------------------------------------------------|----------|
| 2558669924 | DRAFT_00592 | KEGG_module    | M00532: Photorespiration                                               |          |
| 2558669924 | DRAFT_00592 | COG_category   | [E] Amino acid transport and metabolism                                |          |
| 2558669924 | DRAFT_00592 | COG0509        | Glycine cleavage system H protein (lipoate-binding)                    | 6.00E-34 |
| 2558669924 | DRAFT_00592 | pfam01597      | GCV_H                                                                  | 5.90E-37 |
| 2558669924 | DRAFT_00592 | TIGR00527      | glycine cleavage system H protein                                      | 1.00E-43 |
| 2558669924 | DRAFT_00592 | KO:K02437      | glycine cleavage system H protein                                      | 5.30E-30 |
| 2558669924 | DRAFT_00592 | Locus_type     | CDS                                                                    |          |
| 2558669924 | DRAFT_00592 | Product_name   | glycine cleavage system H protein                                      |          |
| 2558669924 | DRAFT_00592 | Scaffold       | DRAFT_contig_70_43_len_52827_read_count_999642.8                       |          |
| 2558669924 | DRAFT_00592 | Coordinates    | 27704..28123(+)                                                        |          |
| 2558669924 | DRAFT_00592 | DNA_length     | 420bp                                                                  |          |
| 2558669924 | DRAFT_00592 | Protein_length | 139aa                                                                  |          |
| 2558669924 | DRAFT_00592 | GC             |                                                                        | 0.55     |
| 2558669925 | DRAFT_00593 | KEGG_module    | M00072: Oligosaccharyltransferase                                      |          |
| 2558669925 | DRAFT_00593 | COG_category   | [R] General function prediction only                                   |          |
| 2558669925 | DRAFT_00593 | COG1287        | Uncharacterized membrane protein, required for N-linked glycosylation  | 6.00E-30 |
| 2558669925 | DRAFT_00593 | pfam02516      | STT3                                                                   | 7.30E-24 |
| 2558669925 | DRAFT_00593 | EC:2.4.99.18   | Dolichyl-diphosphooligosaccharide--protein glycotransferase.           |          |
| 2558669925 | DRAFT_00593 | KO:K07151      | dolichyl-diphosphooligosaccharide--protein glycosyltransferase [EC:2.4 | 0.00E+00 |
| 2558669925 | DRAFT_00593 | Locus_type     | CDS                                                                    |          |
| 2558669925 | DRAFT_00593 | Product_name   | Uncharacterized membrane protein, required for N-linked glycosylation  |          |
| 2558669925 | DRAFT_00593 | Scaffold       | DRAFT_contig_70_43_len_52827_read_count_999642.8                       |          |
| 2558669925 | DRAFT_00593 | Coordinates    | 28080..30503(+)                                                        |          |
| 2558669925 | DRAFT_00593 | DNA_length     | 2424bp                                                                 |          |
| 2558669925 | DRAFT_00593 | Protein_length | 807aa                                                                  |          |
| 2558669925 | DRAFT_00593 | GC             |                                                                        | 0.57     |
| 2558669925 | DRAFT_00593 | Transmembrane  | Yes                                                                    |          |
| 2558669926 | DRAFT_00594 | KEGG_module    | M00425: H/ACA ribonucleoprotein complex                                |          |
| 2558669926 | DRAFT_00594 | COG_category   | [J] Translation, ribosomal structure and biogenesis                    |          |
| 2558669926 | DRAFT_00594 | COG2260        | Predicted Zn-ribbon RNA-binding protein                                | 2.00E-12 |
| 2558669926 | DRAFT_00594 | pfam04135      | Nop10p                                                                 | 1.90E-22 |
| 2558669926 | DRAFT_00594 | KO:K11130      | H/ACA ribonucleoprotein complex subunit 3                              | 8.40E-11 |

|            |             |                |                                                             |          |
|------------|-------------|----------------|-------------------------------------------------------------|----------|
| 2558669926 | DRAFT_00594 | Locus_type     | CDS                                                         |          |
| 2558669926 | DRAFT_00594 | Product_name   | Predicted Zn-ribbon RNA-binding protein                     |          |
| 2558669926 | DRAFT_00594 | Scaffold       | DRAFT_contig_70_43_len_52827_read_count_999642.8            |          |
| 2558669926 | DRAFT_00594 | Coordinates    | 30500..30652(-)                                             |          |
| 2558669926 | DRAFT_00594 | DNA_length     | 153bp                                                       |          |
| 2558669926 | DRAFT_00594 | Protein_length | 50aa                                                        |          |
| 2558669926 | DRAFT_00594 | GC             |                                                             | 0.56     |
|            |             |                |                                                             |          |
| 2558669927 | DRAFT_00595 | COG_category   | [J] Translation, ribosomal structure and biogenesis         |          |
| 2558669927 | DRAFT_00595 | COG1093        | Translation initiation factor 2, alpha subunit (eIF-2alpha) | 8.00E-58 |
| 2558669927 | DRAFT_00595 | pfam00575      | S1                                                          | 3.00E-13 |
| 2558669927 | DRAFT_00595 | pfam07541      | EIF_2_alpha                                                 | 2.00E-25 |
| 2558669927 | DRAFT_00595 | KO:K03237      | translation initiation factor 2 subunit 1                   | 0.00E+00 |
| 2558669927 | DRAFT_00595 | ITERM:01963    | translation initiation factor 2 subunit alpha (aeIF-2a)     |          |
| 2558669927 | DRAFT_00595 | Locus_type     | CDS                                                         |          |
| 2558669927 | DRAFT_00595 | Product_name   | translation initiation factor 2 subunit alpha (aeIF-2a)     |          |
| 2558669927 | DRAFT_00595 | Scaffold       | DRAFT_contig_70_43_len_52827_read_count_999642.8            |          |
| 2558669927 | DRAFT_00595 | Coordinates    | 30661..31461(-)                                             |          |
| 2558669927 | DRAFT_00595 | DNA_length     | 801bp                                                       |          |
| 2558669927 | DRAFT_00595 | Protein_length | 266aa                                                       |          |
| 2558669927 | DRAFT_00595 | GC             |                                                             | 0.57     |
|            |             |                |                                                             |          |
| 2558669928 | DRAFT_00596 | KEGG_module    | M00179: Ribosome, archaea                                   |          |
| 2558669928 | DRAFT_00596 | KEGG_module    | M00177: Ribosome, eukaryotes                                |          |
| 2558669928 | DRAFT_00596 | COG_category   | [J] Translation, ribosomal structure and biogenesis         |          |
| 2558669928 | DRAFT_00596 | COG2051        | Ribosomal protein S27E                                      | 6.00E-11 |
| 2558669928 | DRAFT_00596 | pfam01667      | Ribosomal_S27e                                              | 2.90E-16 |
| 2558669928 | DRAFT_00596 | KO:K02978      | small subunit ribosomal protein S27e                        | 1.40E-10 |
| 2558669928 | DRAFT_00596 | Locus_type     | CDS                                                         |          |
| 2558669928 | DRAFT_00596 | Product_name   | SSU ribosomal protein S27E                                  |          |
| 2558669928 | DRAFT_00596 | Scaffold       | DRAFT_contig_70_43_len_52827_read_count_999642.8            |          |
| 2558669928 | DRAFT_00596 | Coordinates    | 31557..31754(-)                                             |          |
| 2558669928 | DRAFT_00596 | DNA_length     | 198bp                                                       |          |
| 2558669928 | DRAFT_00596 | Protein_length | 65aa                                                        |          |

|            |             |                |                                                             |          |
|------------|-------------|----------------|-------------------------------------------------------------|----------|
| 2558669928 | DRAFT_00596 | GC             |                                                             | 0.56     |
| 2558669929 | DRAFT_00597 | KEGG_module    | M00179: Ribosome, archaea                                   |          |
| 2558669929 | DRAFT_00597 | KEGG_module    | M00177: Ribosome, eukaryotes                                |          |
| 2558669929 | DRAFT_00597 | COG_category   | [J] Translation, ribosomal structure and biogenesis         |          |
| 2558669929 | DRAFT_00597 | COG1631        | Ribosomal protein L44E                                      | 2.00E-15 |
| 2558669929 | DRAFT_00597 | pfam00935      | Ribosomal_L44                                               | 2.40E-25 |
| 2558669929 | DRAFT_00597 | KO:K02929      | large subunit ribosomal protein L44e                        | 4.30E-29 |
| 2558669929 | DRAFT_00597 | Locus_type     | CDS                                                         |          |
| 2558669929 | DRAFT_00597 | Product_name   | Ribosomal protein L44E                                      |          |
| 2558669929 | DRAFT_00597 | Scaffold       | DRAFT_contig_70_43_len_52827_read_count_999642.8            |          |
| 2558669929 | DRAFT_00597 | Coordinates    | 31751..32029(-)                                             |          |
| 2558669929 | DRAFT_00597 | DNA_length     | 279bp                                                       |          |
| 2558669929 | DRAFT_00597 | Protein_length | 92aa                                                        |          |
| 2558669929 | DRAFT_00597 | GC             |                                                             | 0.52     |
| 2558669930 | DRAFT_00598 | KEGG_module    | M00295: BRCA1-associated genome surveillance complex (BASC) |          |
| 2558669930 | DRAFT_00598 | pfam00705      | PCNA_N                                                      | 1.00E-15 |
| 2558669930 | DRAFT_00598 | pfam02747      | PCNA_C                                                      | 4.70E-16 |
| 2558669930 | DRAFT_00598 | TIGR00590      | proliferating cell nuclear antigen (pcna)                   | 1.60E-43 |
| 2558669930 | DRAFT_00598 | KO:K04802      | proliferating cell nuclear antigen                          | 0.00E+00 |
| 2558669930 | DRAFT_00598 | Locus_type     | CDS                                                         |          |
| 2558669930 | DRAFT_00598 | Product_name   | proliferating cell nuclear antigen (pcna)                   |          |
| 2558669930 | DRAFT_00598 | Scaffold       | DRAFT_contig_70_43_len_52827_read_count_999642.8            |          |
| 2558669930 | DRAFT_00598 | Coordinates    | 32371..33123(+)                                             |          |
| 2558669930 | DRAFT_00598 | DNA_length     | 753bp                                                       |          |
| 2558669930 | DRAFT_00598 | Protein_length | 250aa                                                       |          |
| 2558669930 | DRAFT_00598 | GC             |                                                             | 0.56     |
| 2558669931 | DRAFT_00599 | Locus_type     | CDS                                                         |          |
| 2558669931 | DRAFT_00599 | Product_name   | hypothetical protein                                        |          |
| 2558669931 | DRAFT_00599 | Scaffold       | DRAFT_contig_70_43_len_52827_read_count_999642.8            |          |
| 2558669931 | DRAFT_00599 | Coordinates    | 33162..33305(-)                                             |          |
| 2558669931 | DRAFT_00599 | DNA_length     | 144bp                                                       |          |

|            |             |                |                                                                                    |          |
|------------|-------------|----------------|------------------------------------------------------------------------------------|----------|
| 2558669931 | DRAFT_00599 | Protein_length | 47aa                                                                               |          |
| 2558669931 | DRAFT_00599 | GC             |                                                                                    | 0.58     |
| 2558669932 | DRAFT_00600 | Metacyc        | PWY-6749: CMP-legionaminate biosynthesis I                                         |          |
| 2558669932 | DRAFT_00600 | Metacyc        | PWY-6679: jadomycin biosynthesis                                                   |          |
| 2558669932 | DRAFT_00600 | Metacyc        | PWY-7127: CDP-D-mannitol biosynthesis                                              |          |
| 2558669932 | DRAFT_00600 | Metacyc        | PWY-6998: CDP-D-arabitol biosynthesis                                              |          |
| 2558669932 | DRAFT_00600 | Metacyc        | PWY4FS-4: phosphatidylcholine biosynthesis IV                                      |          |
| 2558669932 | DRAFT_00600 | Metacyc        | PWY-6626: CDP-2-glycerol biosynthesis                                              |          |
| 2558669932 | DRAFT_00600 | COG_category   | [L] Replication, recombination and repair                                          |          |
| 2558669932 | DRAFT_00600 | COG1467        | Eukaryotic-type DNA primase, catalytic (small) subunit                             | 2.00E-47 |
| 2558669932 | DRAFT_00600 | pfam01896      | DNA_primase_S                                                                      | 7.00E-16 |
| 2558669932 | DRAFT_00600 | EC:2.7.7.-     | Transferases. Transferring phosphorous-containing groups. Nucleotidyltransferases. |          |
| 2558669932 | DRAFT_00600 | KO:K02683      | DNA primase [EC:2.7.7.-]                                                           | 0.00E+00 |
| 2558669932 | DRAFT_00600 | Locus_type     | CDS                                                                                |          |
| 2558669932 | DRAFT_00600 | Product_name   | Eukaryotic-type DNA primase, catalytic (small) subunit                             |          |
| 2558669932 | DRAFT_00600 | Scaffold       | DRAFT_contig_70_43_len_52827_read_count_999642.8                                   |          |
| 2558669932 | DRAFT_00600 | Coordinates    | 33484..34572(+)                                                                    |          |
| 2558669932 | DRAFT_00600 | DNA_length     | 1089bp                                                                             |          |
| 2558669932 | DRAFT_00600 | Protein_length | 362aa                                                                              |          |
| 2558669932 | DRAFT_00600 | GC             |                                                                                    | 0.59     |
| 2558669933 | DRAFT_00601 | Locus_type     | CDS                                                                                |          |
| 2558669933 | DRAFT_00601 | Product_name   | hypothetical protein                                                               |          |
| 2558669933 | DRAFT_00601 | Scaffold       | DRAFT_contig_70_43_len_52827_read_count_999642.8                                   |          |
| 2558669933 | DRAFT_00601 | Coordinates    | 34573..35130(+)                                                                    |          |
| 2558669933 | DRAFT_00601 | DNA_length     | 558bp                                                                              |          |
| 2558669933 | DRAFT_00601 | Protein_length | 185aa                                                                              |          |
| 2558669933 | DRAFT_00601 | GC             |                                                                                    | 0.55     |
| 2558669934 | DRAFT_00602 | COG_category   | [K] Transcription                                                                  |          |
| 2558669934 | DRAFT_00602 | COG1594        | DNA-directed RNA polymerase, subunit M/Transcription elongation fac                | 1.00E-19 |
| 2558669934 | DRAFT_00602 | pfam01096      | TFIIS_C                                                                            | 2.00E-20 |
| 2558669934 | DRAFT_00602 | TIGR01384      | transcription factor S, archaeal                                                   | 2.30E-26 |



|            |             |                |                                                                        |          |
|------------|-------------|----------------|------------------------------------------------------------------------|----------|
| 2558669934 | DRAFT_00602 | KO:K03057      | transcription elongation factor                                        | 2.90E-21 |
| 2558669934 | DRAFT_00602 | Locus_type     | CDS                                                                    |          |
| 2558669934 | DRAFT_00602 | Product_name   | DNA-directed RNA polymerase, subunit M (EC 2.7.7.6)                    |          |
| 2558669934 | DRAFT_00602 | Scaffold       | DRAFT_contig_70_43_len_52827_read_count_999642.8                       |          |
| 2558669934 | DRAFT_00602 | Coordinates    | 35127..35441(-)                                                        |          |
| 2558669934 | DRAFT_00602 | DNA_length     | 315bp                                                                  |          |
| 2558669934 | DRAFT_00602 | Protein_length | 104aa                                                                  |          |
| 2558669934 | DRAFT_00602 | GC             |                                                                        | 0.53     |
| 2558669935 | DRAFT_00603 | KEGG_module    | M00180: RNA polymerase II, eukaryotes                                  |          |
| 2558669935 | DRAFT_00603 | COG_category   | [K] Transcription                                                      |          |
| 2558669935 | DRAFT_00603 | COG1761        | DNA-directed RNA polymerase, subunit L                                 | 3.00E-08 |
| 2558669935 | DRAFT_00603 | pfam13656      | RNA_pol_L_2                                                            | 2.10E-16 |
| 2558669935 | DRAFT_00603 | KO:K03008      | DNA-directed RNA polymerase II subunit RPB11                           | 4.70E-06 |
| 2558669935 | DRAFT_00603 | Locus_type     | CDS                                                                    |          |
| 2558669935 | DRAFT_00603 | Product_name   | DNA-directed RNA polymerase, subunit L                                 |          |
| 2558669935 | DRAFT_00603 | Scaffold       | DRAFT_contig_70_43_len_52827_read_count_999642.8                       |          |
| 2558669935 | DRAFT_00603 | Coordinates    | 35468..35755(-)                                                        |          |
| 2558669935 | DRAFT_00603 | DNA_length     | 288bp                                                                  |          |
| 2558669935 | DRAFT_00603 | Protein_length | 95aa                                                                   |          |
| 2558669935 | DRAFT_00603 | GC             |                                                                        | 0.55     |
| 2558669936 | DRAFT_00604 | KEGG_module    | M00390: Exosome, archaea                                               |          |
| 2558669936 | DRAFT_00604 | KEGG_module    | M00391: Exosome, eukaryotes                                            |          |
| 2558669936 | DRAFT_00604 | COG_category   | [J] Translation, ribosomal structure and biogenesis                    |          |
| 2558669936 | DRAFT_00604 | COG1096        | Predicted RNA-binding protein (consists of S1 domain and a Zn-ribbon c | 4.00E-26 |
| 2558669936 | DRAFT_00604 | KO:K07573      | exosome complex component CSL4                                         | 3.90E-24 |
| 2558669936 | DRAFT_00604 | Locus_type     | CDS                                                                    |          |
| 2558669936 | DRAFT_00604 | Product_name   | Predicted RNA-binding protein (consists of S1 domain and a Zn-ribbor   |          |
| 2558669936 | DRAFT_00604 | Scaffold       | DRAFT_contig_70_43_len_52827_read_count_999642.8                       |          |
| 2558669936 | DRAFT_00604 | Coordinates    | 35791..36363(-)                                                        |          |
| 2558669936 | DRAFT_00604 | DNA_length     | 573bp                                                                  |          |
| 2558669936 | DRAFT_00604 | Protein_length | 190aa                                                                  |          |
| 2558669936 | DRAFT_00604 | GC             |                                                                        | 0.59     |

|            |             |                |                                                     |          |
|------------|-------------|----------------|-----------------------------------------------------|----------|
| 2558669937 | DRAFT_00605 | COG_category   | [J] Translation, ribosomal structure and biogenesis |          |
| 2558669937 | DRAFT_00605 | COG1736        | Diphthamide synthase subunit DPH2                   | 4.00E-51 |
| 2558669937 | DRAFT_00605 | pfam01866      | Diphthamide_syn                                     | 4.10E-69 |
| 2558669937 | DRAFT_00605 | TIGR03682      | diphthamide biosynthesis enzyme Dph2                | 1.50E-69 |
| 2558669937 | DRAFT_00605 | TIGR00322      | diphthamide biosynthesis enzyme Dph1/Dph2 domain    | 7.70E-64 |
| 2558669937 | DRAFT_00605 | KO:K07561      | diphthamide synthase subunit DPH2                   | 0.00E+00 |
| 2558669937 | DRAFT_00605 | Locus_type     | CDS                                                 |          |
| 2558669937 | DRAFT_00605 | Product_name   | diphthamide biosynthesis enzyme Dph2                |          |
| 2558669937 | DRAFT_00605 | Scaffold       | DRAFT_contig_70_43_len_52827_read_count_999642.8    |          |
| 2558669937 | DRAFT_00605 | Coordinates    | 36360..37391(-)                                     |          |
| 2558669937 | DRAFT_00605 | DNA_length     | 1032bp                                              |          |
| 2558669937 | DRAFT_00605 | Protein_length | 343aa                                               |          |
| 2558669937 | DRAFT_00605 | GC             |                                                     | 0.58     |
| 2558669938 | DRAFT_00606 | KEGG_module    | M00179: Ribosome, archaea                           |          |
| 2558669938 | DRAFT_00606 | KEGG_module    | M00177: Ribosome, eukaryotes                        |          |
| 2558669938 | DRAFT_00606 | COG_category   | [J] Translation, ribosomal structure and biogenesis |          |
| 2558669938 | DRAFT_00606 | COG0197        | Ribosomal protein L16/L10E                          | 1.00E-21 |
| 2558669938 | DRAFT_00606 | pfam00252      | Ribosomal_L16                                       | 2.40E-25 |
| 2558669938 | DRAFT_00606 | TIGR00279      | ribosomal protein L10.e                             | 9.60E-54 |
| 2558669938 | DRAFT_00606 | KO:K02866      | large subunit ribosomal protein L10e                | 1.30E-42 |
| 2558669938 | DRAFT_00606 | Locus_type     | CDS                                                 |          |
| 2558669938 | DRAFT_00606 | Product_name   | LSU ribosomal protein L10AE                         |          |
| 2558669938 | DRAFT_00606 | Scaffold       | DRAFT_contig_70_43_len_52827_read_count_999642.8    |          |
| 2558669938 | DRAFT_00606 | Coordinates    | 37388..37897(-)                                     |          |
| 2558669938 | DRAFT_00606 | DNA_length     | 510bp                                               |          |
| 2558669938 | DRAFT_00606 | Protein_length | 169aa                                               |          |
| 2558669938 | DRAFT_00606 | GC             |                                                     | 0.55     |
| 2558669939 | DRAFT_00607 | pfam13659      | Methyltransf_26                                     | 1.00E-17 |
| 2558669939 | DRAFT_00607 | Locus_type     | CDS                                                 |          |
| 2558669939 | DRAFT_00607 | Product_name   | Methyltransferase domain                            |          |
| 2558669939 | DRAFT_00607 | Scaffold       | DRAFT_contig_70_43_len_52827_read_count_999642.8    |          |

|            |             |                |                 |      |
|------------|-------------|----------------|-----------------|------|
| 2558669939 | DRAFT_00607 | Coordinates    | 37983..39164(+) |      |
| 2558669939 | DRAFT_00607 | DNA_length     | 1182bp          |      |
| 2558669939 | DRAFT_00607 | Protein_length | 393aa           |      |
| 2558669939 | DRAFT_00607 | GC             |                 | 0.61 |

|            |             |         |                                                                                              |  |
|------------|-------------|---------|----------------------------------------------------------------------------------------------|--|
| 2558669940 | DRAFT_00608 | Metacyc | PWY-6739: pinitol biosynthesis II                                                            |  |
| 2558669940 | DRAFT_00608 | Metacyc | PWY-7076: 3,5-dimethoxytoluene biosynthesis                                                  |  |
| 2558669940 | DRAFT_00608 | Metacyc | PWY-7025: gentamicin biosynthesis                                                            |  |
| 2558669940 | DRAFT_00608 | Metacyc | PWY-7045: mithramycin biosynthesis                                                           |  |
| 2558669940 | DRAFT_00608 | Metacyc | PWY-6286: spheroidene and spheroidenone biosynthesis                                         |  |
| 2558669940 | DRAFT_00608 | Metacyc | PWY-5305: bixin biosynthesis                                                                 |  |
| 2558669940 | DRAFT_00608 | Metacyc | PWY-6973: dTDP-D-olivose, dTDP-D-oliose and dTDP-D-mycarose biosynthesis                     |  |
| 2558669940 | DRAFT_00608 | Metacyc | PWY-6650: juvenile hormone III biosynthesis II                                               |  |
| 2558669940 | DRAFT_00608 | Metacyc | PWY-702: methionine biosynthesis II                                                          |  |
| 2558669940 | DRAFT_00608 | Metacyc | PWY-6151: <i>S</i> -adenosyl-L-methionine cycle I                                            |  |
| 2558669940 | DRAFT_00608 | Metacyc | PWY-5135: xanthohumol biosynthesis                                                           |  |
| 2558669940 | DRAFT_00608 | Metacyc | PWY-7151: polymethylated quercetin glucoside biosynthesis II - quercetagenin series (Chryso) |  |
| 2558669940 | DRAFT_00608 | Metacyc | PWY-7149: superpathway polymethylated quercetin/quercetagenin glucoside biosynthesis (Ch     |  |
| 2558669940 | DRAFT_00608 | Metacyc | PWY-5391: syringetin biosynthesis                                                            |  |
| 2558669940 | DRAFT_00608 | Metacyc | PWY-5729: vestitol and sativan biosynthesis                                                  |  |
| 2558669940 | DRAFT_00608 | Metacyc | PWY-3542: choline biosynthesis II                                                            |  |
| 2558669940 | DRAFT_00608 | Metacyc | PWY-1422: vitamin E biosynthesis                                                             |  |
| 2558669940 | DRAFT_00608 | Metacyc | PWY-5975: furaneol biosynthesis                                                              |  |
| 2558669940 | DRAFT_00608 | Metacyc | PWY-6682: dehydrophos biosynthesis                                                           |  |
| 2558669940 | DRAFT_00608 | Metacyc | PWY-5882: epoxypseudoisoeugenol-2-methylbutyrate biosynthesis                                |  |
| 2558669940 | DRAFT_00608 | Metacyc | PWY-7161: polymethylated quercetin biosynthesis                                              |  |
| 2558669940 | DRAFT_00608 | Metacyc | PWY-5867: <i>t</i> -anethole biosynthesis                                                    |  |
| 2558669940 | DRAFT_00608 | Metacyc | PWY-7135: emetine biosynthesis                                                               |  |
| 2558669940 | DRAFT_00608 | Metacyc | PWY-5287: sanguinarine and macarpine biosynthesis                                            |  |
| 2558669940 | DRAFT_00608 | Metacyc | PWY-6154: autoinducer AI-2 biosynthesis II ( <i>Vibrio</i> )                                 |  |
| 2558669940 | DRAFT_00608 | Metacyc | METH-ACETATE-PWY: methanogenesis from acetate                                                |  |
| 2558669940 | DRAFT_00608 | Metacyc | PWY-6339: syringate degradation                                                              |  |
| 2558669940 | DRAFT_00608 | Metacyc | PWY-6045: methylthiopropionate degradation II (demethylation)                                |  |
| 2558669940 | DRAFT_00608 | Metacyc | PWY-6736: sulfur volatiles biosynthesis                                                      |  |

|                        |         |                                                                                                |
|------------------------|---------|------------------------------------------------------------------------------------------------|
| 2558669940 DRAFT_00608 | Metacyc | PWY-6303: methyl indole-3-acetate interconversion                                              |
| 2558669940 DRAFT_00608 | Metacyc | PWY-6666: pyocyanin biosynthesis                                                               |
| 2558669940 DRAFT_00608 | Metacyc | PWY-5987: sorgoleone biosynthesis                                                              |
| 2558669940 DRAFT_00608 | Metacyc | PWY-5876: magnoflorine biosynthesis                                                            |
| 2558669940 DRAFT_00608 | Metacyc | PWY-5846: colchicine biosynthesis                                                              |
| 2558669940 DRAFT_00608 | Metacyc | PWY-6581: spirilloxanthin and 2,2'-diketo-spirilloxanthin biosynthesis                         |
| 2558669940 DRAFT_00608 | Metacyc | PWY-5773: gossypol biosynthesis                                                                |
| 2558669940 DRAFT_00608 | Metacyc | PWY-6424: sitosterol biosynthesis                                                              |
| 2558669940 DRAFT_00608 | Metacyc | PWY-5765: 1,3,5-trimethoxybenzene biosynthesis                                                 |
| 2558669940 DRAFT_00608 | Metacyc | PWY-5665: vanilla biosynthesis                                                                 |
| 2558669940 DRAFT_00608 | Metacyc | PWY-7150: polymethylated quercetin glucoside biosynthesis I - quercetin series (Chrysosplenin) |
| 2558669940 DRAFT_00608 | Metacyc | PWY-7055: daphnetin modification                                                               |
| 2558669940 DRAFT_00608 | Metacyc | PWY-4942: cyclopropane and cyclopropene fatty acid biosynthesis                                |
| 2558669940 DRAFT_00608 | Metacyc | PWY-5507: adenosylcobalamin biosynthesis I (early cobalt insertion)                            |
| 2558669940 DRAFT_00608 | Metacyc | PWY-1581: plastoquinol-9 biosynthesis I                                                        |
| 2558669940 DRAFT_00608 | Metacyc | PWY-7104: dTDP-L-megosamine biosynthesis                                                       |
| 2558669940 DRAFT_00608 | Metacyc | PWY-7163: polymethylated kaempferol biosynthesis                                               |
| 2558669940 DRAFT_00608 | Metacyc | PWY-6631: <i>O</i> -methylation of tricetin                                                    |
| 2558669940 DRAFT_00608 | Metacyc | PWY-6427: rot-2'-enonate biosynthesis                                                          |
| 2558669940 DRAFT_00608 | Metacyc | PWY-7186: superpathway of scopolin and esculin biosynthesis                                    |
| 2558669940 DRAFT_00608 | Metacyc | PWY-6442: spermidine hydroxycinnamic acid conjugates biosynthesis                              |
| 2558669940 DRAFT_00608 | Metacyc | PWY-5748: $\gamma$ -coniciene and coniine biosynthesis                                         |
| 2558669940 DRAFT_00608 | Metacyc | PWY-5467: gramine biosynthesis                                                                 |
| 2558669940 DRAFT_00608 | Metacyc | METHIONINE-DEG1-PWY: methionine degradation I (to homocysteine)                                |
| 2558669940 DRAFT_00608 | Metacyc | PWY-6477: gibberellin inactivation II (methylation)                                            |
| 2558669940 DRAFT_00608 | Metacyc | PWY-1061: homogalacturonan biosynthesis                                                        |
| 2558669940 DRAFT_00608 | Metacyc | PWY-6976: dTDP-L-mycarose biosynthesis                                                         |
| 2558669940 DRAFT_00608 | Metacyc | PWY-6575: juvenile hormone III biosynthesis I                                                  |
| 2558669940 DRAFT_00608 | Metacyc | PWY-5041: <i>S</i> -adenosyl-L-methionine cycle II                                             |
| 2558669940 DRAFT_00608 | Metacyc | PWY-6955: lincomycin biosynthesis                                                              |
| 2558669940 DRAFT_00608 | Metacyc | PWY-7160: polymethylated myricetin biosynthesis (tomato)                                       |
| 2558669940 DRAFT_00608 | Metacyc | PWY-7079: geodin biosynthesis                                                                  |
| 2558669940 DRAFT_00608 | Metacyc | PWY-6933: seleno-amino acid detoxification and volatilization III                              |
| 2558669940 DRAFT_00608 | Metacyc | PWY-6153: autoinducer AI-2 biosynthesis I                                                      |

|            |             |                |                                                                      |          |
|------------|-------------|----------------|----------------------------------------------------------------------|----------|
| 2558669940 | DRAFT_00608 | Metacyc        | PWY-6978: plastoquinol-9 biosynthesis II                             |          |
| 2558669940 | DRAFT_00608 | Metacyc        | PWY-4021: &beta;-alanine betaine biosynthesis                        |          |
| 2558669940 | DRAFT_00608 | Metacyc        | PWY-6835: 6-gingerol biosynthesis                                    |          |
| 2558669940 | DRAFT_00608 | Metacyc        | PWY-7157: eupatolitin 3-<i>O</i>-glucoside biosynthesis              |          |
| 2558669940 | DRAFT_00608 | Metacyc        | PWY-7058: esculetin modification                                     |          |
| 2558669940 | DRAFT_00608 | Metacyc        | PWY-5479: podophyllotoxin and 6-methoxypodophyllotoxin biosynthesis  |          |
| 2558669940 | DRAFT_00608 | Metacyc        | PWY-7138: noscapine biosynthesis                                     |          |
| 2558669940 | DRAFT_00608 | Metacyc        | PWY-5290: secologanin and strictosidine biosynthesis                 |          |
| 2558669940 | DRAFT_00608 | Metacyc        | PWYG-321: mycolate biosynthesis                                      |          |
| 2558669940 | DRAFT_00608 | Metacyc        | PWY-5209: methyl-coenzyme M oxidation to CO <sub>2</sub>             |          |
| 2558669940 | DRAFT_00608 | Metacyc        | PWY-7097: vanillin and vanillate degradation I                       |          |
| 2558669940 | DRAFT_00608 | Metacyc        | PWY-6052: dimethylsulfoniopropionate degradation III (demethylation) |          |
| 2558669940 | DRAFT_00608 | COG_category   | [J] Translation, ribosomal structure and biogenesis                  |          |
| 2558669940 | DRAFT_00608 | COG0565        | rRNA methylase                                                       | 9.00E-38 |
| 2558669940 | DRAFT_00608 | pfam00588      | SpoU_methylase                                                       | 3.60E-24 |
| 2558669940 | DRAFT_00608 | EC:2.1.1.-     | Transferases. Transferring one-carbon groups. Methyltransferases.    |          |
| 2558669940 | DRAFT_00608 | TIGR00050      | RNA methyltransferase, TrmH family, group 1                          | 2.10E-46 |
| 2558669940 | DRAFT_00608 | KO:K02533      | tRNA/rRNA methyltransferase [EC:2.1.1.-]                             | 9.70E-33 |
| 2558669940 | DRAFT_00608 | Locus_type     | CDS                                                                  |          |
| 2558669940 | DRAFT_00608 | Product_name   | rRNA methylase                                                       |          |
| 2558669940 | DRAFT_00608 | Scaffold       | DRAFT_contig_70_43_len_52827_read_count_999642.8                     |          |
| 2558669940 | DRAFT_00608 | Coordinates    | 39140..39853(-)                                                      |          |
| 2558669940 | DRAFT_00608 | DNA_length     | 714bp                                                                |          |
| 2558669940 | DRAFT_00608 | Protein_length | 237aa                                                                |          |
| 2558669940 | DRAFT_00608 | GC             |                                                                      | 0.56     |
| 2558669941 | DRAFT_00609 | Locus_type     | CDS                                                                  |          |
| 2558669941 | DRAFT_00609 | Product_name   | hypothetical protein                                                 |          |
| 2558669941 | DRAFT_00609 | Scaffold       | DRAFT_contig_70_43_len_52827_read_count_999642.8                     |          |
| 2558669941 | DRAFT_00609 | Coordinates    | 39995..40219(+)                                                      |          |
| 2558669941 | DRAFT_00609 | DNA_length     | 225bp                                                                |          |
| 2558669941 | DRAFT_00609 | Protein_length | 74aa                                                                 |          |
| 2558669941 | DRAFT_00609 | GC             |                                                                      | 0.57     |

|            |             |                |                                                                       |          |
|------------|-------------|----------------|-----------------------------------------------------------------------|----------|
| 2558669942 | DRAFT_00610 | COG_category   | [J] Translation, ribosomal structure and biogenesis                   |          |
| 2558669942 | DRAFT_00610 | COG0030        | Dimethyladenosine transferase (rRNA methylation)                      | 6.00E-36 |
| 2558669942 | DRAFT_00610 | pfam00398      | RrnaAD                                                                | 6.50E-33 |
| 2558669942 | DRAFT_00610 | EC:2.1.1.182   | 16S rRNA (adenine(1518)-N(6)/adenine(1519)-N(6))-dimethyltransferase. |          |
| 2558669942 | DRAFT_00610 | KO:K02528      | 16S rRNA (adenine1518-N6/adenine1519-N6)-dimethyltransferase [EC:     | 4.50E-41 |
| 2558669942 | DRAFT_00610 | Locus_type     | CDS                                                                   |          |
| 2558669942 | DRAFT_00610 | Product_name   | Dimethyladenosine transferase (rRNA methylation)                      |          |
| 2558669942 | DRAFT_00610 | Scaffold       | DRAFT_contig_70_43_len_52827_read_count_999642.8                      |          |
| 2558669942 | DRAFT_00610 | Coordinates    | 40143..40886(-)                                                       |          |
| 2558669942 | DRAFT_00610 | DNA_length     | 744bp                                                                 |          |
| 2558669942 | DRAFT_00610 | Protein_length | 247aa                                                                 |          |
| 2558669942 | DRAFT_00610 | GC             |                                                                       | 0.58     |
| 2558669943 | DRAFT_00611 | COG_category   | [J] Translation, ribosomal structure and biogenesis                   |          |
| 2558669943 | DRAFT_00611 | COG1491        | Predicted RNA-binding protein                                         | 5.00E-42 |
| 2558669943 | DRAFT_00611 | pfam04919      | DUF655                                                                | 9.10E-52 |
| 2558669943 | DRAFT_00611 | KO:K07572      | putative nucleotide binding protein                                   | 0.00E+00 |
| 2558669943 | DRAFT_00611 | Locus_type     | CDS                                                                   |          |
| 2558669943 | DRAFT_00611 | Product_name   | Predicted RNA-binding protein                                         |          |
| 2558669943 | DRAFT_00611 | Scaffold       | DRAFT_contig_70_43_len_52827_read_count_999642.8                      |          |
| 2558669943 | DRAFT_00611 | Coordinates    | 40883..41440(-)                                                       |          |
| 2558669943 | DRAFT_00611 | DNA_length     | 558bp                                                                 |          |
| 2558669943 | DRAFT_00611 | Protein_length | 185aa                                                                 |          |
| 2558669943 | DRAFT_00611 | GC             |                                                                       | 0.56     |
| 2558669944 | DRAFT_00612 | KEGG_module    | M00184: RNA polymerase, archaea                                       |          |
| 2558669944 | DRAFT_00612 | COG_category   | [S] Function unknown                                                  |          |
| 2558669944 | DRAFT_00612 | COG1460        | Uncharacterized protein conserved in archaea                          | 9.00E-10 |
| 2558669944 | DRAFT_00612 | pfam03874      | RNA_pol_Rpb4                                                          | 3.10E-14 |
| 2558669944 | DRAFT_00612 | EC:2.7.7.6     | DNA-directed RNA polymerase.                                          |          |
| 2558669944 | DRAFT_00612 | KO:K03051      | DNA-directed RNA polymerase subunit F [EC:2.7.7.6]                    | 2.80E-24 |
| 2558669944 | DRAFT_00612 | ITERM:01967    | DNA-directed RNA polymerase, subunit F (EC 2.7.7.6)                   |          |
| 2558669944 | DRAFT_00612 | Locus_type     | CDS                                                                   |          |
| 2558669944 | DRAFT_00612 | Product_name   | DNA-directed RNA polymerase, subunit F (EC 2.7.7.6)                   |          |

|            |             |                |                                                                               |          |
|------------|-------------|----------------|-------------------------------------------------------------------------------|----------|
| 2558669944 | DRAFT_00612 | Scaffold       | DRAFT_contig_70_43_len_52827_read_count_999642.8                              |          |
| 2558669944 | DRAFT_00612 | Coordinates    | 41587..41907(-)                                                               |          |
| 2558669944 | DRAFT_00612 | DNA_length     | 321bp                                                                         |          |
| 2558669944 | DRAFT_00612 | Protein_length | 106aa                                                                         |          |
| 2558669944 | DRAFT_00612 | GC             |                                                                               | 0.52     |
|            |             |                |                                                                               |          |
| 2558669945 | DRAFT_00613 | KEGG_module    | M00177: Ribosome, eukaryotes                                                  |          |
| 2558669945 | DRAFT_00613 | KEGG_module    | M00179: Ribosome, archaea                                                     |          |
| 2558669945 | DRAFT_00613 | COG_category   | [J] Translation, ribosomal structure and biogenesis                           |          |
| 2558669945 | DRAFT_00613 | COG2139        | Ribosomal protein L21E                                                        | 2.00E-17 |
| 2558669945 | DRAFT_00613 | pfam01157      | Ribosomal_L21e                                                                | 3.80E-15 |
| 2558669945 | DRAFT_00613 | KO:K02889      | large subunit ribosomal protein L21e                                          | 3.70E-23 |
| 2558669945 | DRAFT_00613 | Locus_type     | CDS                                                                           |          |
| 2558669945 | DRAFT_00613 | Product_name   | Ribosomal protein L21E                                                        |          |
| 2558669945 | DRAFT_00613 | Scaffold       | DRAFT_contig_70_43_len_52827_read_count_999642.8                              |          |
| 2558669945 | DRAFT_00613 | Coordinates    | 41904..42191(-)                                                               |          |
| 2558669945 | DRAFT_00613 | DNA_length     | 288bp                                                                         |          |
| 2558669945 | DRAFT_00613 | Protein_length | 95aa                                                                          |          |
| 2558669945 | DRAFT_00613 | GC             |                                                                               | 0.54     |
|            |             |                |                                                                               |          |
| 2558669946 | DRAFT_00614 | Metacyc        | RIBOKIN-PWY: ribose degradation                                               |          |
| 2558669946 | DRAFT_00614 | COG_category   | [J] Translation, ribosomal structure and biogenesis                           |          |
| 2558669946 | DRAFT_00614 | COG1258        | Predicted pseudouridylate synthase                                            | 1.00E-33 |
| 2558669946 | DRAFT_00614 | pfam02926      | THUMP                                                                         | 2.20E-04 |
| 2558669946 | DRAFT_00614 | EC:5.4.99.-    | Isomerases. Intramolecular transferases (mutases). Transferring other groups. |          |
| 2558669946 | DRAFT_00614 | TIGR01213      | tRNA pseudouridine(54/55) synthase                                            | 1.30E-39 |
| 2558669946 | DRAFT_00614 | KO:K07583      | tRNA pseudouridine synthase 10 [EC:5.4.99.-]                                  | 0.00E+00 |
| 2558669946 | DRAFT_00614 | Locus_type     | CDS                                                                           |          |
| 2558669946 | DRAFT_00614 | Product_name   | Predicted pseudouridylate synthase                                            |          |
| 2558669946 | DRAFT_00614 | Scaffold       | DRAFT_contig_70_43_len_52827_read_count_999642.8                              |          |
| 2558669946 | DRAFT_00614 | Coordinates    | 42157..43275(-)                                                               |          |
| 2558669946 | DRAFT_00614 | DNA_length     | 1119bp                                                                        |          |
| 2558669946 | DRAFT_00614 | Protein_length | 372aa                                                                         |          |
| 2558669946 | DRAFT_00614 | GC             |                                                                               | 0.61     |

|            |             |                |                                                                    |          |
|------------|-------------|----------------|--------------------------------------------------------------------|----------|
| 2558669947 | DRAFT_00615 | KEGG_module    | M00335: Sec (secretion) system                                     |          |
| 2558669947 | DRAFT_00615 | COG_category   | [U] Intracellular trafficking, secretion, and vesicular transport  |          |
| 2558669947 | DRAFT_00615 | COG0541        | Signal recognition particle GTPase                                 | 0.00E+00 |
| 2558669947 | DRAFT_00615 | pfam02978      | SRP_SPB                                                            | 4.40E-30 |
| 2558669947 | DRAFT_00615 | pfam00448      | SRP54                                                              | 6.70E-68 |
| 2558669947 | DRAFT_00615 | pfam02881      | SRP54_N                                                            | 9.20E-16 |
| 2558669947 | DRAFT_00615 | KO:K03106      | signal recognition particle subunit SRP54                          | 0.00E+00 |
| 2558669947 | DRAFT_00615 | ITERM:01969    | signal recognition particle subunit FFH/SRP54 (srp54)              |          |
| 2558669947 | DRAFT_00615 | Locus_type     | CDS                                                                |          |
| 2558669947 | DRAFT_00615 | Product_name   | signal recognition particle subunit FFH/SRP54 (srp54)              |          |
| 2558669947 | DRAFT_00615 | Scaffold       | DRAFT_contig_70_43_len_52827_read_count_999642.8                   |          |
| 2558669947 | DRAFT_00615 | Coordinates    | 43286..44608(-)                                                    |          |
| 2558669947 | DRAFT_00615 | DNA_length     | 1323bp                                                             |          |
| 2558669947 | DRAFT_00615 | Protein_length | 440aa                                                              |          |
| 2558669947 | DRAFT_00615 | GC             |                                                                    | 0.6      |
| 2558669948 | DRAFT_00616 | COG_category   | [R] General function prediction only                               |          |
| 2558669948 | DRAFT_00616 | COG2102        | Predicted ATPases of PP-loop superfamily                           | 2.00E-68 |
| 2558669948 | DRAFT_00616 | pfam01902      | ATP_bind_4                                                         | 1.40E-65 |
| 2558669948 | DRAFT_00616 | TIGR00289      | TIGR00289 family protein                                           | 2.20E-73 |
| 2558669948 | DRAFT_00616 | TIGR03679      | arCOG00187 universal archaeal metal-binding-domain/4Fe-4S-binding- | 2.10E-83 |
| 2558669948 | DRAFT_00616 | TIGR00290      | MJ0570-related uncharacterized domain                              | 5.60E-68 |
| 2558669948 | DRAFT_00616 | Locus_type     | CDS                                                                |          |
| 2558669948 | DRAFT_00616 | Product_name   | arCOG00187 universal archaeal metal-binding-domain/4Fe-4S-binding- |          |
| 2558669948 | DRAFT_00616 | Scaffold       | DRAFT_contig_70_43_len_52827_read_count_999642.8                   |          |
| 2558669948 | DRAFT_00616 | Coordinates    | 44689..45378(+)                                                    |          |
| 2558669948 | DRAFT_00616 | DNA_length     | 690bp                                                              |          |
| 2558669948 | DRAFT_00616 | Protein_length | 229aa                                                              |          |
| 2558669948 | DRAFT_00616 | GC             |                                                                    | 0.63     |
| 2558669949 | DRAFT_00617 | COG_category   | [R] General function prediction only                               |          |
| 2558669949 | DRAFT_00617 | COG2262        | GTPases                                                            | 2.00E-73 |
| 2558669949 | DRAFT_00617 | pfam13167      | GTP-bdg_N                                                          | 2.10E-10 |



|            |             |                |                                                                            |          |
|------------|-------------|----------------|----------------------------------------------------------------------------|----------|
| 2558669949 | DRAFT_00617 | pfam01926      | MMR_HSR1                                                                   | 4.30E-17 |
| 2558669949 | DRAFT_00617 | TIGR03156      | GTP-binding protein HflX                                                   | 9.60E-86 |
| 2558669949 | DRAFT_00617 | KO:K03665      | GTP-binding protein HflX                                                   | 0.00E+00 |
| 2558669949 | DRAFT_00617 | Locus_type     | CDS                                                                        |          |
| 2558669949 | DRAFT_00617 | Product_name   | GTP-binding protein HflX                                                   |          |
| 2558669949 | DRAFT_00617 | Scaffold       | DRAFT_contig_70_43_len_52827_read_count_999642.8                           |          |
| 2558669949 | DRAFT_00617 | Coordinates    | 45418..46446(-)                                                            |          |
| 2558669949 | DRAFT_00617 | DNA_length     | 1029bp                                                                     |          |
| 2558669949 | DRAFT_00617 | Protein_length | 342aa                                                                      |          |
| 2558669949 | DRAFT_00617 | GC             |                                                                            | 0.59     |
| 2558669950 | DRAFT_00618 | IMG_pathway    | 854: Hypusine synthesis                                                    |          |
| 2558669950 | DRAFT_00618 | COG_category   | [J] Translation, ribosomal structure and biogenesis                        |          |
| 2558669950 | DRAFT_00618 | COG0231        | Translation elongation factor P (EF-P)/translation initiation factor 5A (e | 4.00E-25 |
| 2558669950 | DRAFT_00618 | pfam08207      | EFP_N                                                                      | 4.00E-06 |
| 2558669950 | DRAFT_00618 | pfam01287      | eIF-5a                                                                     | 3.60E-12 |
| 2558669950 | DRAFT_00618 | TIGR00037      | translation elongation factor IF5A                                         | 2.10E-41 |
| 2558669950 | DRAFT_00618 | KO:K03263      | translation initiation factor 5A                                           | 3.00E-34 |
| 2558669950 | DRAFT_00618 | ITERM:01965    | translation initiation factor 5A precursor (eIF-5A)                        |          |
| 2558669950 | DRAFT_00618 | Locus_type     | CDS                                                                        |          |
| 2558669950 | DRAFT_00618 | Product_name   | translation initiation factor 5A precursor (eIF-5A)                        |          |
| 2558669950 | DRAFT_00618 | Scaffold       | DRAFT_contig_70_43_len_52827_read_count_999642.8                           |          |
| 2558669950 | DRAFT_00618 | Coordinates    | 47428..47838(-)                                                            |          |
| 2558669950 | DRAFT_00618 | DNA_length     | 411bp                                                                      |          |
| 2558669950 | DRAFT_00618 | Protein_length | 136aa                                                                      |          |
| 2558669950 | DRAFT_00618 | GC             |                                                                            | 0.58     |
| 2558669951 | DRAFT_00619 | Locus_type     | CDS                                                                        |          |
| 2558669951 | DRAFT_00619 | Product_name   | hypothetical protein                                                       |          |
| 2558669951 | DRAFT_00619 | Scaffold       | DRAFT_contig_70_43_len_52827_read_count_999642.8                           |          |
| 2558669951 | DRAFT_00619 | Coordinates    | 47978..48613(-)                                                            |          |
| 2558669951 | DRAFT_00619 | DNA_length     | 636bp                                                                      |          |
| 2558669951 | DRAFT_00619 | Protein_length | 211aa                                                                      |          |
| 2558669951 | DRAFT_00619 | GC             |                                                                            | 0.54     |

|            |             |                |                                                                              |          |
|------------|-------------|----------------|------------------------------------------------------------------------------|----------|
| 2558669951 | DRAFT_00619 | Transmembrane  | Yes                                                                          |          |
| 2558669952 | DRAFT_00620 | COG_category   | [R] General function prediction only                                         |          |
| 2558669952 | DRAFT_00620 | COG1439        | Predicted nucleic acid-binding protein, consists of a PIN domain and a z     | 9.00E-32 |
| 2558669952 | DRAFT_00620 | KO:K07060      | UPF0271 protein                                                              | 1.10E-22 |
| 2558669952 | DRAFT_00620 | Locus_type     | CDS                                                                          |          |
| 2558669952 | DRAFT_00620 | Product_name   | Predicted nucleic acid-binding protein, consists of a PIN domain and a       |          |
| 2558669952 | DRAFT_00620 | Scaffold       | DRAFT_contig_70_43_len_52827_read_count_999642.8                             |          |
| 2558669952 | DRAFT_00620 | Coordinates    | 48980..49474(+)                                                              |          |
| 2558669952 | DRAFT_00620 | DNA_length     | 495bp                                                                        |          |
| 2558669952 | DRAFT_00620 | Protein_length | 164aa                                                                        |          |
| 2558669952 | DRAFT_00620 | GC             |                                                                              | 0.59     |
| 2558669953 | DRAFT_00621 | COG_category   | [K] Transcription                                                            |          |
| 2558669953 | DRAFT_00621 | COG1405        | Transcription initiation factor TFIIIB, Brf1 subunit/Transcription initiatic | 1.00E-70 |
| 2558669953 | DRAFT_00621 | pfam08271      | TF_Zn_Ribbon                                                                 | 2.80E-13 |
| 2558669953 | DRAFT_00621 | pfam00382      | TFIIB                                                                        | 5.50E-15 |
| 2558669953 | DRAFT_00621 | pfam00382      | TFIIB                                                                        | 9.30E-17 |
| 2558669953 | DRAFT_00621 | KO:K03124      | transcription initiation factor TFIIB                                        | 0.00E+00 |
| 2558669953 | DRAFT_00621 | ITERM:01912    | Transcription initiation factor IIB (TFIIB)                                  |          |
| 2558669953 | DRAFT_00621 | Locus_type     | CDS                                                                          |          |
| 2558669953 | DRAFT_00621 | Product_name   | Transcription initiation factor IIB (TFIIB)                                  |          |
| 2558669953 | DRAFT_00621 | Scaffold       | DRAFT_contig_70_43_len_52827_read_count_999642.8                             |          |
| 2558669953 | DRAFT_00621 | Coordinates    | 49600..50562(+)                                                              |          |
| 2558669953 | DRAFT_00621 | DNA_length     | 963bp                                                                        |          |
| 2558669953 | DRAFT_00621 | Protein_length | 320aa                                                                        |          |
| 2558669953 | DRAFT_00621 | GC             |                                                                              | 0.61     |
| 2558669954 | DRAFT_00622 | Locus_type     | tRNA                                                                         |          |
| 2558669954 | DRAFT_00622 | Product_name   | tRNA_Ala_CGC                                                                 |          |
| 2558669954 | DRAFT_00622 | Scaffold       | DRAFT_contig_70_43_len_52827_read_count_999642.8                             |          |
| 2558669954 | DRAFT_00622 | Coordinates    | 50570..50660(-)                                                              |          |
| 2558669954 | DRAFT_00622 | DNA_length     | 91bp                                                                         |          |
| 2558669954 | DRAFT_00622 | GC             |                                                                              | 0.69     |

|            |             |                |                                                                  |          |
|------------|-------------|----------------|------------------------------------------------------------------|----------|
| 2558669955 | DRAFT_00623 | Metacyc        | PYRIDNUCSAL-PWY: NAD salvage pathway I                           |          |
| 2558669955 | DRAFT_00623 | Metacyc        | PWY-5381: pyridine nucleotide cycling (plants)                   |          |
| 2558669955 | DRAFT_00623 | COG_category   | [H] Coenzyme transport and metabolism                            |          |
| 2558669955 | DRAFT_00623 | COG1488        | Nicotinic acid phosphoribosyltransferase                         | 1.00E-67 |
| 2558669955 | DRAFT_00623 | pfam01729      | QRPTase_C                                                        | 2.80E-17 |
| 2558669955 | DRAFT_00623 | EC:2.4.2.11    | Nicotinate phosphoribosyltransferase.                            |          |
| 2558669955 | DRAFT_00623 | TIGR01513      | putative nicotinate phosphoribosyltransferase                    | 1.90E-45 |
| 2558669955 | DRAFT_00623 | KO:K00763      | nicotinate phosphoribosyltransferase [EC:2.4.2.11]               | 0.00E+00 |
| 2558669955 | DRAFT_00623 | Locus_type     | CDS                                                              |          |
| 2558669955 | DRAFT_00623 | Product_name   | Nicotinic acid phosphoribosyltransferase                         |          |
| 2558669955 | DRAFT_00623 | Scaffold       | DRAFT_contig_70_43_len_52827_read_count_999642.8                 |          |
| 2558669955 | DRAFT_00623 | Coordinates    | 50767..51987(+)                                                  |          |
| 2558669955 | DRAFT_00623 | DNA_length     | 1221bp                                                           |          |
| 2558669955 | DRAFT_00623 | Protein_length | 406aa                                                            |          |
| 2558669955 | DRAFT_00623 | GC             |                                                                  | 0.62     |
| 2558669956 | DRAFT_00624 | Metacyc        | PWY-5846: colchicine biosynthesis                                |          |
| 2558669956 | DRAFT_00624 | Metacyc        | PWY-6984: lipoate salvage II                                     |          |
| 2558669956 | DRAFT_00624 | Metacyc        | PWY-5381: pyridine nucleotide cycling (plants)                   |          |
| 2558669956 | DRAFT_00624 | Metacyc        | PYRIDNUCSAL-PWY: NAD salvage pathway I                           |          |
| 2558669956 | DRAFT_00624 | Metacyc        | LYSDEGII-PWY: lysine degradation III                             |          |
| 2558669956 | DRAFT_00624 | Metacyc        | P621-PWY: nylon-6 oligomer degradation                           |          |
| 2558669956 | DRAFT_00624 | Metacyc        | PWY-5665: vanilla biosynthesis                                   |          |
| 2558669956 | DRAFT_00624 | Metacyc        | PWY-6899: base-degraded thiamin salvage                          |          |
| 2558669956 | DRAFT_00624 | Metacyc        | PWY-6431: 4-hydroxybenzoate biosynthesis IV                      |          |
| 2558669956 | DRAFT_00624 | Metacyc        | PWY-6855: chitin degradation I (archaea)                         |          |
| 2558669956 | DRAFT_00624 | Metacyc        | PWY-1822: indole-3-acetate activation I                          |          |
| 2558669956 | DRAFT_00624 | Metacyc        | PWY-7018: paromomycin biosynthesis                               |          |
| 2558669956 | DRAFT_00624 | Metacyc        | P345-PWY: aldoxime degradation                                   |          |
| 2558669956 | DRAFT_00624 | Metacyc        | PWY-5784: IAA conjugate biosynthesis II                          |          |
| 2558669956 | DRAFT_00624 | COG_category   | [Q] Secondary metabolites biosynthesis, transport and catabolism |          |
| 2558669956 | DRAFT_00624 | COG1335        | Amidases related to nicotinamidase                               | 5.00E-34 |
| 2558669956 | DRAFT_00624 | pfam00857      | Isochorismatase                                                  | 5.30E-36 |

|            |             |                |                                                                                          |          |
|------------|-------------|----------------|------------------------------------------------------------------------------------------|----------|
| 2558669956 | DRAFT_00624 | EC:3.5.1.19    | Nicotinamidase.                                                                          |          |
| 2558669956 | DRAFT_00624 | EC:3.5.1.-     | Hydrolases. Acting on carbon-nitrogen bonds, other than peptide bonds. In linear amides. |          |
| 2558669956 | DRAFT_00624 | KO:K08281      | nicotinamidase/pyrazinamidase [EC:3.5.1.19 3.5.1.-]                                      | 0.00E+00 |
| 2558669956 | DRAFT_00624 | Locus_type     | CDS                                                                                      |          |
| 2558669956 | DRAFT_00624 | Product_name   | Amidases related to nicotinamidase                                                       |          |
| 2558669956 | DRAFT_00624 | Scaffold       | DRAFT_contig_70_43_len_52827_read_count_999642.8                                         |          |
| 2558669956 | DRAFT_00624 | Coordinates    | 52012..52617(+)                                                                          |          |
| 2558669956 | DRAFT_00624 | DNA_length     | 606bp                                                                                    |          |
| 2558669956 | DRAFT_00624 | Protein_length | 201aa                                                                                    |          |
| 2558669956 | DRAFT_00624 | GC             |                                                                                          | 0.61     |
| 2558669957 | DRAFT_00625 | TIGR03804      | parallel beta-helix repeat (two copies)                                                  | 2.00E-09 |
| 2558669957 | DRAFT_00625 | Locus_type     | CDS                                                                                      |          |
| 2558669957 | DRAFT_00625 | Product_name   | parallel beta-helix repeat (two copies)                                                  |          |
| 2558669957 | DRAFT_00625 | Scaffold       | DRAFT_contig_70_43_len_52827_read_count_999642.8                                         |          |
| 2558669957 | DRAFT_00625 | Coordinates    | 52636..52824(+)                                                                          |          |
| 2558669957 | DRAFT_00625 | DNA_length     | 189bp                                                                                    |          |
| 2558669957 | DRAFT_00625 | Protein_length | 63aa                                                                                     |          |
| 2558669957 | DRAFT_00625 | GC             |                                                                                          | 0.6      |
| 2558669958 | DRAFT_00626 | Locus_type     | CDS                                                                                      |          |
| 2558669958 | DRAFT_00626 | Product_name   | hypothetical protein                                                                     |          |
| 2558669958 | DRAFT_00626 | Scaffold       | DRAFT_contig_70_57_len_46680_read_count_840764.9                                         |          |
| 2558669958 | DRAFT_00626 | Coordinates    | 103..375(+)                                                                              |          |
| 2558669958 | DRAFT_00626 | DNA_length     | 273bp                                                                                    |          |
| 2558669958 | DRAFT_00626 | Protein_length | 90aa                                                                                     |          |
| 2558669958 | DRAFT_00626 | GC             |                                                                                          | 0.49     |
| 2558669959 | DRAFT_00627 | Locus_type     | CDS                                                                                      |          |
| 2558669959 | DRAFT_00627 | Product_name   | hypothetical protein                                                                     |          |
| 2558669959 | DRAFT_00627 | Scaffold       | DRAFT_contig_70_57_len_46680_read_count_840764.9                                         |          |
| 2558669959 | DRAFT_00627 | Coordinates    | 668..994(+)                                                                              |          |
| 2558669959 | DRAFT_00627 | DNA_length     | 327bp                                                                                    |          |
| 2558669959 | DRAFT_00627 | Protein_length | 108aa                                                                                    |          |

|            |             |                |                                                                                |      |
|------------|-------------|----------------|--------------------------------------------------------------------------------|------|
| 2558669959 | DRAFT_00627 | GC             |                                                                                | 0.55 |
| 2558669959 | DRAFT_00627 | Transmembrane  | Yes                                                                            |      |
| 2558669960 | DRAFT_00628 | Locus_type     | CDS                                                                            |      |
| 2558669960 | DRAFT_00628 | Product_name   | hypothetical protein                                                           |      |
| 2558669960 | DRAFT_00628 | Scaffold       | DRAFT_contig_70_57_len_46680_read_count_840764.9                               |      |
| 2558669960 | DRAFT_00628 | Coordinates    | 991..1473(+)                                                                   |      |
| 2558669960 | DRAFT_00628 | DNA_length     | 483bp                                                                          |      |
| 2558669960 | DRAFT_00628 | Protein_length | 160aa                                                                          |      |
| 2558669960 | DRAFT_00628 | GC             |                                                                                | 0.56 |
| 2558669960 | DRAFT_00628 | Transmembrane  | Yes                                                                            |      |
| 2558669961 | DRAFT_00629 | Locus_type     | CDS                                                                            |      |
| 2558669961 | DRAFT_00629 | Product_name   | hypothetical protein                                                           |      |
| 2558669961 | DRAFT_00629 | Scaffold       | DRAFT_contig_70_57_len_46680_read_count_840764.9                               |      |
| 2558669961 | DRAFT_00629 | Coordinates    | 1524..1931(+)                                                                  |      |
| 2558669961 | DRAFT_00629 | DNA_length     | 408bp                                                                          |      |
| 2558669961 | DRAFT_00629 | Protein_length | 135aa                                                                          |      |
| 2558669961 | DRAFT_00629 | GC             |                                                                                | 0.54 |
| 2558669961 | DRAFT_00629 | Transmembrane  | Yes                                                                            |      |
| 2558669962 | DRAFT_00630 | KEGG_module    | M00364: C10-C20 isoprenoid biosynthesis, bacteria                              |      |
| 2558669962 | DRAFT_00630 | KEGG_module    | M00365: C10-C20 isoprenoid biosynthesis, archaea                               |      |
| 2558669962 | DRAFT_00630 | Metacyc        | PWY-7141: linalool biosynthesis II                                             |      |
| 2558669962 | DRAFT_00630 | Metacyc        | PWY-7102: bisabolene biosynthesis                                              |      |
| 2558669962 | DRAFT_00630 | Metacyc        | PWY-6859: <i>all-trans</i>-farnesol biosynthesis                               |      |
| 2558669962 | DRAFT_00630 | Metacyc        | PWY-6691: plaunotol biosynthesis                                               |      |
| 2558669962 | DRAFT_00630 | Metacyc        | PWY-5122: geranyl diphosphate biosynthesis                                     |      |
| 2558669962 | DRAFT_00630 | Metacyc        | PWY2OL-4: superpathway of linalool biosynthesis                                |      |
| 2558669962 | DRAFT_00630 | Metacyc        | PWY-6383: mono-<i>trans</i>, poly-<i>cis</i> decaprenyl phosphate biosynthesis |      |
| 2558669962 | DRAFT_00630 | Metacyc        | PWY-5123: <i>trans, trans</i>-farnesyl diphosphate biosynthesis                |      |
| 2558669962 | DRAFT_00630 | Metacyc        | PWY-6659: fusicoccins biosynthesis                                             |      |
| 2558669962 | DRAFT_00630 | Metacyc        | PWY-7182: linalool biosynthesis I                                              |      |
| 2558669962 | DRAFT_00630 | Metacyc        | PWY-5120: geranylgeranyldiphosphate biosynthesis                               |      |

|            |             |                |                                                                            |           |
|------------|-------------|----------------|----------------------------------------------------------------------------|-----------|
| 2558669962 | DRAFT_00630 | COG_category   | [H] Coenzyme transport and metabolism                                      |           |
| 2558669962 | DRAFT_00630 | COG0142        | Geranylgeranyl pyrophosphate synthase                                      | 4.00E-59  |
| 2558669962 | DRAFT_00630 | pfam00348      | polyprenyl_synt                                                            | 1.60E-50  |
| 2558669962 | DRAFT_00630 | EC:2.5.1.29    | Geranylgeranyl diphosphate synthase.                                       |           |
| 2558669962 | DRAFT_00630 | EC:2.5.1.1     | Dimethylallyltranstransferase.                                             |           |
| 2558669962 | DRAFT_00630 | EC:2.5.1.10    | (2E,6E)-farnesyl diphosphate synthase.                                     |           |
| 2558669962 | DRAFT_00630 | KO:K13787      | geranylgeranyl diphosphate synthase, type I [EC:2.5.1.1 2.5.1.10 2.5.1.10] | 0.00E+00  |
| 2558669962 | DRAFT_00630 | Locus_type     | CDS                                                                        |           |
| 2558669962 | DRAFT_00630 | Product_name   | Geranylgeranyl pyrophosphate synthase                                      |           |
| 2558669962 | DRAFT_00630 | Scaffold       | DRAFT_contig_70_57_len_46680_read_count_840764.9                           |           |
| 2558669962 | DRAFT_00630 | Coordinates    | 2103..3074(-)                                                              |           |
| 2558669962 | DRAFT_00630 | DNA_length     | 972bp                                                                      |           |
| 2558669962 | DRAFT_00630 | Protein_length | 323aa                                                                      |           |
| 2558669962 | DRAFT_00630 | GC             |                                                                            | 0.55      |
| 2558669963 | DRAFT_00631 | COG_category   | [R] General function prediction only                                       |           |
| 2558669963 | DRAFT_00631 | COG3975        | Predicted protease with the C-terminal PDZ domain                          | 7.00E-112 |
| 2558669963 | DRAFT_00631 | pfam13180      | PDZ_2                                                                      | 9.90E-08  |
| 2558669963 | DRAFT_00631 | pfam05299      | Peptidase_M61                                                              | 1.20E-38  |
| 2558669963 | DRAFT_00631 | Locus_type     | CDS                                                                        |           |
| 2558669963 | DRAFT_00631 | Product_name   | Predicted protease with the C-terminal PDZ domain                          |           |
| 2558669963 | DRAFT_00631 | Scaffold       | DRAFT_contig_70_57_len_46680_read_count_840764.9                           |           |
| 2558669963 | DRAFT_00631 | Coordinates    | 3293..5077(-)                                                              |           |
| 2558669963 | DRAFT_00631 | DNA_length     | 1785bp                                                                     |           |
| 2558669963 | DRAFT_00631 | Protein_length | 594aa                                                                      |           |
| 2558669963 | DRAFT_00631 | GC             |                                                                            | 0.57      |
| 2558669964 | DRAFT_00632 | COG_category   | [C] Energy production and conversion                                       |           |
| 2558669964 | DRAFT_00632 | COG0667        | Predicted oxidoreductases (related to aryl-alcohol dehydrogenases)         | 4.00E-86  |
| 2558669964 | DRAFT_00632 | pfam00248      | Aldo_ket_red                                                               | 2.10E-72  |
| 2558669964 | DRAFT_00632 | Locus_type     | CDS                                                                        |           |
| 2558669964 | DRAFT_00632 | Product_name   | Predicted oxidoreductases (related to aryl-alcohol dehydrogenases)         |           |
| 2558669964 | DRAFT_00632 | Scaffold       | DRAFT_contig_70_57_len_46680_read_count_840764.9                           |           |
| 2558669964 | DRAFT_00632 | Coordinates    | 5235..6218(-)                                                              |           |

|            |             |                |                                                  |          |
|------------|-------------|----------------|--------------------------------------------------|----------|
| 2558669964 | DRAFT_00632 | DNA_length     | 984bp                                            |          |
| 2558669964 | DRAFT_00632 | Protein_length | 327aa                                            |          |
| 2558669964 | DRAFT_00632 | GC             |                                                  | 0.55     |
| 2558669965 | DRAFT_00633 | COG_category   | [R] General function prediction only             |          |
| 2558669965 | DRAFT_00633 | COG1451        | Predicted metal-dependent hydrolase              | 1.00E-19 |
| 2558669965 | DRAFT_00633 | pfam01863      | DUF45                                            | 1.50E-38 |
| 2558669965 | DRAFT_00633 | Locus_type     | CDS                                              |          |
| 2558669965 | DRAFT_00633 | Product_name   | Predicted metal-dependent hydrolase              |          |
| 2558669965 | DRAFT_00633 | Scaffold       | DRAFT_contig_70_57_len_46680_read_count_840764.9 |          |
| 2558669965 | DRAFT_00633 | Coordinates    | 6582..7271(+)                                    |          |
| 2558669965 | DRAFT_00633 | DNA_length     | 690bp                                            |          |
| 2558669965 | DRAFT_00633 | Protein_length | 229aa                                            |          |
| 2558669965 | DRAFT_00633 | GC             |                                                  | 0.56     |
| 2558669966 | DRAFT_00634 | COG_category   | [S] Function unknown                             |          |
| 2558669966 | DRAFT_00634 | COG3832        | Uncharacterized conserved protein                | 2.00E-11 |
| 2558669966 | DRAFT_00634 | pfam08327      | AHSA1                                            | 1.40E-18 |
| 2558669966 | DRAFT_00634 | Locus_type     | CDS                                              |          |
| 2558669966 | DRAFT_00634 | Product_name   | Uncharacterized conserved protein                |          |
| 2558669966 | DRAFT_00634 | Scaffold       | DRAFT_contig_70_57_len_46680_read_count_840764.9 |          |
| 2558669966 | DRAFT_00634 | Coordinates    | 7305..7841(-)                                    |          |
| 2558669966 | DRAFT_00634 | DNA_length     | 537bp                                            |          |
| 2558669966 | DRAFT_00634 | Protein_length | 178aa                                            |          |
| 2558669966 | DRAFT_00634 | GC             |                                                  | 0.58     |
| 2558669967 | DRAFT_00635 | Locus_type     | CDS                                              |          |
| 2558669967 | DRAFT_00635 | Product_name   | hypothetical protein                             |          |
| 2558669967 | DRAFT_00635 | Scaffold       | DRAFT_contig_70_57_len_46680_read_count_840764.9 |          |
| 2558669967 | DRAFT_00635 | Coordinates    | 7808..8032(-)                                    |          |
| 2558669967 | DRAFT_00635 | DNA_length     | 225bp                                            |          |
| 2558669967 | DRAFT_00635 | Protein_length | 74aa                                             |          |
| 2558669967 | DRAFT_00635 | GC             |                                                  | 0.55     |
| 2558669967 | DRAFT_00635 | Transmembrane  | Yes                                              |          |

|            |             |                |                                                                   |          |
|------------|-------------|----------------|-------------------------------------------------------------------|----------|
| 2558669968 | DRAFT_00636 | COG_category   | [O] Posttranslational modification, protein turnover, chaperones  |          |
| 2558669968 | DRAFT_00636 | COG1225        | Peroxiredoxin                                                     | 8.00E-09 |
| 2558669968 | DRAFT_00636 | pfam00578      | AhpC-TSA                                                          | 2.20E-20 |
| 2558669968 | DRAFT_00636 | Locus_type     | CDS                                                               |          |
| 2558669968 | DRAFT_00636 | Product_name   | Peroxiredoxin                                                     |          |
| 2558669968 | DRAFT_00636 | Scaffold       | DRAFT_contig_70_57_len_46680_read_count_840764.9                  |          |
| 2558669968 | DRAFT_00636 | Coordinates    | 8130..8657(+)                                                     |          |
| 2558669968 | DRAFT_00636 | DNA_length     | 528bp                                                             |          |
| 2558669968 | DRAFT_00636 | Protein_length | 175aa                                                             |          |
| 2558669968 | DRAFT_00636 | GC             |                                                                   | 0.58     |
|            |             |                |                                                                   |          |
| 2558669969 | DRAFT_00637 | Locus_type     | CDS                                                               |          |
| 2558669969 | DRAFT_00637 | Product_name   | hypothetical protein                                              |          |
| 2558669969 | DRAFT_00637 | Scaffold       | DRAFT_contig_70_57_len_46680_read_count_840764.9                  |          |
| 2558669969 | DRAFT_00637 | Coordinates    | 8893..9069(+)                                                     |          |
| 2558669969 | DRAFT_00637 | DNA_length     | 177bp                                                             |          |
| 2558669969 | DRAFT_00637 | Protein_length | 58aa                                                              |          |
| 2558669969 | DRAFT_00637 | GC             |                                                                   | 0.56     |
|            |             |                |                                                                   |          |
| 2558669970 | DRAFT_00638 | COG_category   | [R] General function prediction only                              |          |
| 2558669970 | DRAFT_00638 | COG0705        | Uncharacterized membrane protein (homolog of Drosophila rhomboid' | 4.00E-03 |
| 2558669970 | DRAFT_00638 | pfam01694      | Rhomboid                                                          | 1.70E-16 |
| 2558669970 | DRAFT_00638 | Locus_type     | CDS                                                               |          |
| 2558669970 | DRAFT_00638 | Product_name   | Uncharacterized membrane protein (homolog of Drosophila rhomboid' |          |
| 2558669970 | DRAFT_00638 | Scaffold       | DRAFT_contig_70_57_len_46680_read_count_840764.9                  |          |
| 2558669970 | DRAFT_00638 | Coordinates    | 9184..9741(+)                                                     |          |
| 2558669970 | DRAFT_00638 | DNA_length     | 558bp                                                             |          |
| 2558669970 | DRAFT_00638 | Protein_length | 185aa                                                             |          |
| 2558669970 | DRAFT_00638 | GC             |                                                                   | 0.58     |
| 2558669970 | DRAFT_00638 | Transmembrane  | Yes                                                               |          |
|            |             |                |                                                                   |          |
| 2558669971 | DRAFT_00639 | Locus_type     | CDS                                                               |          |
| 2558669971 | DRAFT_00639 | Product_name   | hypothetical protein                                              |          |



|            |             |                |                                                                    |           |
|------------|-------------|----------------|--------------------------------------------------------------------|-----------|
| 2558669971 | DRAFT_00639 | Scaffold       | DRAFT_contig_70_57_len_46680_read_count_840764.9                   |           |
| 2558669971 | DRAFT_00639 | Coordinates    | 9822..10133(+)                                                     |           |
| 2558669971 | DRAFT_00639 | DNA_length     | 312bp                                                              |           |
| 2558669971 | DRAFT_00639 | Protein_length | 103aa                                                              |           |
| 2558669971 | DRAFT_00639 | GC             |                                                                    | 0.51      |
|            |             |                |                                                                    |           |
| 2558669972 | DRAFT_00640 | Locus_type     | CDS                                                                |           |
| 2558669972 | DRAFT_00640 | Product_name   | hypothetical protein                                               |           |
| 2558669972 | DRAFT_00640 | Scaffold       | DRAFT_contig_70_57_len_46680_read_count_840764.9                   |           |
| 2558669972 | DRAFT_00640 | Coordinates    | 10165..10530(-)                                                    |           |
| 2558669972 | DRAFT_00640 | DNA_length     | 366bp                                                              |           |
| 2558669972 | DRAFT_00640 | Protein_length | 121aa                                                              |           |
| 2558669972 | DRAFT_00640 | GC             |                                                                    | 0.54      |
|            |             |                |                                                                    |           |
| 2558669973 | DRAFT_00641 | Locus_type     | CDS                                                                |           |
| 2558669973 | DRAFT_00641 | Product_name   | hypothetical protein                                               |           |
| 2558669973 | DRAFT_00641 | Scaffold       | DRAFT_contig_70_57_len_46680_read_count_840764.9                   |           |
| 2558669973 | DRAFT_00641 | Coordinates    | 10739..10936(-)                                                    |           |
| 2558669973 | DRAFT_00641 | DNA_length     | 198bp                                                              |           |
| 2558669973 | DRAFT_00641 | Protein_length | 65aa                                                               |           |
| 2558669973 | DRAFT_00641 | GC             |                                                                    | 0.52      |
| 2558669973 | DRAFT_00641 | Transmembrane  | Yes                                                                |           |
|            |             |                |                                                                    |           |
| 2558669974 | DRAFT_00642 | COG_category   | [C] Energy production and conversion                               |           |
| 2558669974 | DRAFT_00642 | COG0667        | Predicted oxidoreductases (related to aryl-alcohol dehydrogenases) | 7.00E-79  |
| 2558669974 | DRAFT_00642 | pfam00248      | Aldo_ket_red                                                       | 5.00E-71  |
| 2558669974 | DRAFT_00642 | TIGR01293      | voltage-dependent potassium channel beta subunit, animal           | 1.20E-117 |
| 2558669974 | DRAFT_00642 | Locus_type     | CDS                                                                |           |
| 2558669974 | DRAFT_00642 | Product_name   | voltage-dependent potassium channel beta subunit, animal           |           |
| 2558669974 | DRAFT_00642 | Scaffold       | DRAFT_contig_70_57_len_46680_read_count_840764.9                   |           |
| 2558669974 | DRAFT_00642 | Coordinates    | 11014..11994(+)                                                    |           |
| 2558669974 | DRAFT_00642 | DNA_length     | 981bp                                                              |           |
| 2558669974 | DRAFT_00642 | Protein_length | 326aa                                                              |           |
| 2558669974 | DRAFT_00642 | GC             |                                                                    | 0.59      |

|            |             |                |                                                                        |          |
|------------|-------------|----------------|------------------------------------------------------------------------|----------|
| 2558669975 | DRAFT_00643 | COG_category   | [C] Energy production and conversion                                   |          |
| 2558669975 | DRAFT_00643 | COG0778        | Nitroreductase                                                         | 4.00E-13 |
| 2558669975 | DRAFT_00643 | pfam00881      | Nitroreductase                                                         | 6.20E-19 |
| 2558669975 | DRAFT_00643 | Locus_type     | CDS                                                                    |          |
| 2558669975 | DRAFT_00643 | Product_name   | Nitroreductase                                                         |          |
| 2558669975 | DRAFT_00643 | Scaffold       | DRAFT_contig_70_57_len_46680_read_count_840764.9                       |          |
| 2558669975 | DRAFT_00643 | Coordinates    | 12079..12597(+)                                                        |          |
| 2558669975 | DRAFT_00643 | DNA_length     | 519bp                                                                  |          |
| 2558669975 | DRAFT_00643 | Protein_length | 172aa                                                                  |          |
| 2558669975 | DRAFT_00643 | GC             |                                                                        | 0.57     |
| 2558669976 | DRAFT_00644 | pfam02195      | ParBc                                                                  | 7.10E-21 |
| 2558669976 | DRAFT_00644 | TIGR00180      | ParB/RepB/Spo0J family partition protein                               | 2.40E-33 |
| 2558669976 | DRAFT_00644 | KO:K03497      | chromosome partitioning protein, ParB family                           | 1.30E-22 |
| 2558669976 | DRAFT_00644 | Locus_type     | CDS                                                                    |          |
| 2558669976 | DRAFT_00644 | Product_name   | ParB/RepB/Spo0J family partition protein                               |          |
| 2558669976 | DRAFT_00644 | Scaffold       | DRAFT_contig_70_57_len_46680_read_count_840764.9                       |          |
| 2558669976 | DRAFT_00644 | Coordinates    | 12635..13537(-)                                                        |          |
| 2558669976 | DRAFT_00644 | DNA_length     | 903bp                                                                  |          |
| 2558669976 | DRAFT_00644 | Protein_length | 300aa                                                                  |          |
| 2558669976 | DRAFT_00644 | GC             |                                                                        | 0.6      |
| 2558669977 | DRAFT_00645 | KEGG_module    | M00023: Tryptophan biosynthesis, chorismate => tryptophan              |          |
| 2558669977 | DRAFT_00645 | COG_category   | [R] General function prediction only                                   |          |
| 2558669977 | DRAFT_00645 | COG1350        | Predicted alternative tryptophan synthase beta-subunit (paralog of Trp | 0.00E+00 |
| 2558669977 | DRAFT_00645 | pfam00291      | PALP                                                                   | 2.40E-36 |
| 2558669977 | DRAFT_00645 | EC:4.2.1.20    | Tryptophan synthase.                                                   |          |
| 2558669977 | DRAFT_00645 | TIGR01415      | pyridoxal-phosphate dependent TrpB-like enzyme                         | 0.00E+00 |
| 2558669977 | DRAFT_00645 | KO:K06001      | tryptophan synthase beta chain [EC:4.2.1.20]                           | 0.00E+00 |
| 2558669977 | DRAFT_00645 | Locus_type     | CDS                                                                    |          |
| 2558669977 | DRAFT_00645 | Product_name   | pyridoxal-phosphate dependent TrpB-like enzyme                         |          |
| 2558669977 | DRAFT_00645 | Scaffold       | DRAFT_contig_70_57_len_46680_read_count_840764.9                       |          |
| 2558669977 | DRAFT_00645 | Coordinates    | 13669..14970(-)                                                        |          |

|            |             |                |                                                  |          |
|------------|-------------|----------------|--------------------------------------------------|----------|
| 2558669977 | DRAFT_00645 | DNA_length     | 1302bp                                           |          |
| 2558669977 | DRAFT_00645 | Protein_length | 433aa                                            |          |
| 2558669977 | DRAFT_00645 | GC             |                                                  | 0.6      |
| 2558669978 | DRAFT_00646 | Locus_type     | CDS                                              |          |
| 2558669978 | DRAFT_00646 | Product_name   | hypothetical protein                             |          |
| 2558669978 | DRAFT_00646 | Scaffold       | DRAFT_contig_70_57_len_46680_read_count_840764.9 |          |
| 2558669978 | DRAFT_00646 | Coordinates    | 15139..15321(+)                                  |          |
| 2558669978 | DRAFT_00646 | DNA_length     | 183bp                                            |          |
| 2558669978 | DRAFT_00646 | Protein_length | 60aa                                             |          |
| 2558669978 | DRAFT_00646 | GC             |                                                  | 0.54     |
| 2558669979 | DRAFT_00647 | Locus_type     | CDS                                              |          |
| 2558669979 | DRAFT_00647 | Product_name   | hypothetical protein                             |          |
| 2558669979 | DRAFT_00647 | Scaffold       | DRAFT_contig_70_57_len_46680_read_count_840764.9 |          |
| 2558669979 | DRAFT_00647 | Coordinates    | 15348..15467(+)                                  |          |
| 2558669979 | DRAFT_00647 | DNA_length     | 120bp                                            |          |
| 2558669979 | DRAFT_00647 | Protein_length | 39aa                                             |          |
| 2558669979 | DRAFT_00647 | GC             |                                                  | 0.64     |
| 2558669979 | DRAFT_00647 | Transmembrane  | Yes                                              |          |
| 2558669980 | DRAFT_00648 | Locus_type     | CDS                                              |          |
| 2558669980 | DRAFT_00648 | Product_name   | hypothetical protein                             |          |
| 2558669980 | DRAFT_00648 | Scaffold       | DRAFT_contig_70_57_len_46680_read_count_840764.9 |          |
| 2558669980 | DRAFT_00648 | Coordinates    | 15672..15920(+)                                  |          |
| 2558669980 | DRAFT_00648 | DNA_length     | 249bp                                            |          |
| 2558669980 | DRAFT_00648 | Protein_length | 82aa                                             |          |
| 2558669980 | DRAFT_00648 | GC             |                                                  | 0.53     |
| 2558669980 | DRAFT_00648 | Transmembrane  | Yes                                              |          |
| 2558669981 | DRAFT_00649 | COG_category   | [L] Replication, recombination and repair        |          |
| 2558669981 | DRAFT_00649 | COG3316        | Transposase and inactivated derivatives          | 5.00E-12 |
| 2558669981 | DRAFT_00649 | pfam13610      | DDE_Tnp_IS240                                    | 3.40E-22 |
| 2558669981 | DRAFT_00649 | Locus_type     | CDS                                              |          |

|            |             |                |                                                                     |          |
|------------|-------------|----------------|---------------------------------------------------------------------|----------|
| 2558669981 | DRAFT_00649 | Product_name   | Transposase and inactivated derivatives                             |          |
| 2558669981 | DRAFT_00649 | Scaffold       | DRAFT_contig_70_57_len_46680_read_count_840764.9                    |          |
| 2558669981 | DRAFT_00649 | Coordinates    | 15904..17046(-)                                                     |          |
| 2558669981 | DRAFT_00649 | DNA_length     | 1143bp                                                              |          |
| 2558669981 | DRAFT_00649 | Protein_length | 380aa                                                               |          |
| 2558669981 | DRAFT_00649 | GC             |                                                                     | 0.54     |
|            |             |                |                                                                     |          |
| 2558669982 | DRAFT_00650 | Locus_type     | CDS                                                                 |          |
| 2558669982 | DRAFT_00650 | Product_name   | hypothetical protein                                                |          |
| 2558669982 | DRAFT_00650 | Scaffold       | DRAFT_contig_70_57_len_46680_read_count_840764.9                    |          |
| 2558669982 | DRAFT_00650 | Coordinates    | 17182..17430(+)                                                     |          |
| 2558669982 | DRAFT_00650 | DNA_length     | 249bp                                                               |          |
| 2558669982 | DRAFT_00650 | Protein_length | 82aa                                                                |          |
| 2558669982 | DRAFT_00650 | GC             |                                                                     | 0.54     |
|            |             |                |                                                                     |          |
| 2558669983 | DRAFT_00651 | Locus_type     | CDS                                                                 |          |
| 2558669983 | DRAFT_00651 | Product_name   | hypothetical protein                                                |          |
| 2558669983 | DRAFT_00651 | Scaffold       | DRAFT_contig_70_57_len_46680_read_count_840764.9                    |          |
| 2558669983 | DRAFT_00651 | Coordinates    | 17427..17774(+)                                                     |          |
| 2558669983 | DRAFT_00651 | DNA_length     | 348bp                                                               |          |
| 2558669983 | DRAFT_00651 | Protein_length | 115aa                                                               |          |
| 2558669983 | DRAFT_00651 | GC             |                                                                     | 0.51     |
|            |             |                |                                                                     |          |
| 2558669984 | DRAFT_00652 | Locus_type     | CDS                                                                 |          |
| 2558669984 | DRAFT_00652 | Product_name   | hypothetical protein                                                |          |
| 2558669984 | DRAFT_00652 | Scaffold       | DRAFT_contig_70_57_len_46680_read_count_840764.9                    |          |
| 2558669984 | DRAFT_00652 | Coordinates    | 17764..18162(+)                                                     |          |
| 2558669984 | DRAFT_00652 | DNA_length     | 399bp                                                               |          |
| 2558669984 | DRAFT_00652 | Protein_length | 132aa                                                               |          |
| 2558669984 | DRAFT_00652 | GC             |                                                                     | 0.5      |
|            |             |                |                                                                     |          |
| 2558669985 | DRAFT_00653 | COG_category   | [O] Posttranslational modification, protein turnover, chaperones    |          |
| 2558669985 | DRAFT_00653 | COG0229        | Conserved domain frequently associated with peptide methionine sulf | 3.00E-48 |
| 2558669985 | DRAFT_00653 | pfam01641      | SelR                                                                | 5.50E-48 |

|            |             |                |                                                  |          |
|------------|-------------|----------------|--------------------------------------------------|----------|
| 2558669985 | DRAFT_00653 | TIGR00357      | methionine-R-sulfoxide reductase                 | 2.80E-56 |
| 2558669985 | DRAFT_00653 | Locus_type     | CDS                                              |          |
| 2558669985 | DRAFT_00653 | Product_name   | methionine-R-sulfoxide reductase                 |          |
| 2558669985 | DRAFT_00653 | Scaffold       | DRAFT_contig_70_57_len_46680_read_count_840764.9 |          |
| 2558669985 | DRAFT_00653 | Coordinates    | 18152..18937(+)                                  |          |
| 2558669985 | DRAFT_00653 | DNA_length     | 786bp                                            |          |
| 2558669985 | DRAFT_00653 | Protein_length | 261aa                                            |          |
| 2558669985 | DRAFT_00653 | GC             |                                                  | 0.54     |
|            |             |                |                                                  |          |
| 2558669986 | DRAFT_00654 | Locus_type     | CDS                                              |          |
| 2558669986 | DRAFT_00654 | Product_name   | hypothetical protein                             |          |
| 2558669986 | DRAFT_00654 | Scaffold       | DRAFT_contig_70_57_len_46680_read_count_840764.9 |          |
| 2558669986 | DRAFT_00654 | Coordinates    | 19243..19779(+)                                  |          |
| 2558669986 | DRAFT_00654 | DNA_length     | 537bp                                            |          |
| 2558669986 | DRAFT_00654 | Protein_length | 178aa                                            |          |
| 2558669986 | DRAFT_00654 | GC             |                                                  | 0.56     |
|            |             |                |                                                  |          |
| 2558669987 | DRAFT_00655 | pfam00027      | cNMP_binding                                     | 1.70E-19 |
| 2558669987 | DRAFT_00655 | Locus_type     | CDS                                              |          |
| 2558669987 | DRAFT_00655 | Product_name   | Cyclic nucleotide-binding domain                 |          |
| 2558669987 | DRAFT_00655 | Scaffold       | DRAFT_contig_70_57_len_46680_read_count_840764.9 |          |
| 2558669987 | DRAFT_00655 | Coordinates    | 20123..20548(+)                                  |          |
| 2558669987 | DRAFT_00655 | DNA_length     | 426bp                                            |          |
| 2558669987 | DRAFT_00655 | Protein_length | 141aa                                            |          |
| 2558669987 | DRAFT_00655 | GC             |                                                  | 0.57     |
|            |             |                |                                                  |          |
| 2558669988 | DRAFT_00656 | COG_category   | [G] Carbohydrate transport and metabolism        |          |
| 2558669988 | DRAFT_00656 | COG1082        | Sugar phosphate isomerases/epimerases            | 2.00E-21 |
| 2558669988 | DRAFT_00656 | pfam01261      | AP_endonuc_2                                     | 5.00E-25 |
| 2558669988 | DRAFT_00656 | Locus_type     | CDS                                              |          |
| 2558669988 | DRAFT_00656 | Product_name   | Sugar phosphate isomerases/epimerases            |          |
| 2558669988 | DRAFT_00656 | Scaffold       | DRAFT_contig_70_57_len_46680_read_count_840764.9 |          |
| 2558669988 | DRAFT_00656 | Coordinates    | 20599..21408(+)                                  |          |
| 2558669988 | DRAFT_00656 | DNA_length     | 810bp                                            |          |

|            |             |                |                                                                       |                                                                      |          |
|------------|-------------|----------------|-----------------------------------------------------------------------|----------------------------------------------------------------------|----------|
| 2558669988 | DRAFT_00656 | Protein_length |                                                                       | 269aa                                                                |          |
| 2558669988 | DRAFT_00656 | GC             |                                                                       |                                                                      | 0.59     |
| 2558669989 | DRAFT_00657 | Locus_type     |                                                                       | CDS                                                                  |          |
| 2558669989 | DRAFT_00657 | Product_name   |                                                                       | hypothetical protein                                                 |          |
| 2558669989 | DRAFT_00657 | Scaffold       |                                                                       | DRAFT_contig_70_57_len_46680_read_count_840764.9                     |          |
| 2558669989 | DRAFT_00657 | Coordinates    |                                                                       | 21620..21892(+)                                                      |          |
| 2558669989 | DRAFT_00657 | DNA_length     |                                                                       | 273bp                                                                |          |
| 2558669989 | DRAFT_00657 | Protein_length |                                                                       | 90aa                                                                 |          |
| 2558669989 | DRAFT_00657 | GC             |                                                                       |                                                                      | 0.58     |
| 2558669990 | DRAFT_00658 | pfam00571      | CBS                                                                   |                                                                      | 2.10E-13 |
| 2558669990 | DRAFT_00658 | pfam00571      | CBS                                                                   |                                                                      | 6.10E-09 |
| 2558669990 | DRAFT_00658 | Locus_type     |                                                                       | CDS                                                                  |          |
| 2558669990 | DRAFT_00658 | Product_name   |                                                                       | Predicted signal-transduction protein containing cAMP-binding and CI |          |
| 2558669990 | DRAFT_00658 | Scaffold       |                                                                       | DRAFT_contig_70_57_len_46680_read_count_840764.9                     |          |
| 2558669990 | DRAFT_00658 | Coordinates    |                                                                       | 21975..22487(+)                                                      |          |
| 2558669990 | DRAFT_00658 | DNA_length     |                                                                       | 513bp                                                                |          |
| 2558669990 | DRAFT_00658 | Protein_length |                                                                       | 170aa                                                                |          |
| 2558669990 | DRAFT_00658 | GC             |                                                                       |                                                                      | 0.57     |
| 2558669991 | DRAFT_00659 | KEGG_module    | M00051: Uridine monophosphate biosynthesis, glutamine (+ PRPP) => UMP |                                                                      |          |
| 2558669991 | DRAFT_00659 | Metacyc        | PWY-5686: UMP biosynthesis                                            |                                                                      |          |
| 2558669991 | DRAFT_00659 | IMG_pathway    | 321: Uridine 5'-monophosphate biosynthesis                            |                                                                      |          |
| 2558669991 | DRAFT_00659 | COG_category   | [F] Nucleotide transport and metabolism                               |                                                                      |          |
| 2558669991 | DRAFT_00659 | COG0284        | Orotidine-5'-phosphate decarboxylase                                  |                                                                      | 1.00E-25 |
| 2558669991 | DRAFT_00659 | pfam00215      | OMPdecase                                                             |                                                                      | 5.30E-25 |
| 2558669991 | DRAFT_00659 | EC:4.1.1.23    | Orotidine-5'-phosphate decarboxylase.                                 |                                                                      |          |
| 2558669991 | DRAFT_00659 | TIGR01740      | orotidine 5'-phosphate decarboxylase, subfamily 1                     |                                                                      | 5.20E-29 |
| 2558669991 | DRAFT_00659 | KO:K01591      | orotidine-5'-phosphate decarboxylase [EC:4.1.1.23]                    |                                                                      | 7.00E-45 |
| 2558669991 | DRAFT_00659 | ITERM:01394    | orotidine-5'-phosphate decarboxylase (EC 4.1.1.23)                    |                                                                      |          |
| 2558669991 | DRAFT_00659 | Locus_type     |                                                                       | CDS                                                                  |          |
| 2558669991 | DRAFT_00659 | Product_name   |                                                                       | orotidine-5'-phosphate decarboxylase (EC 4.1.1.23)                   |          |
| 2558669991 | DRAFT_00659 | Scaffold       |                                                                       | DRAFT_contig_70_57_len_46680_read_count_840764.9                     |          |

|            |             |                |                                                                       |           |
|------------|-------------|----------------|-----------------------------------------------------------------------|-----------|
| 2558669991 | DRAFT_00659 | Coordinates    | 23246..23974(-)                                                       |           |
| 2558669991 | DRAFT_00659 | DNA_length     | 729bp                                                                 |           |
| 2558669991 | DRAFT_00659 | Protein_length | 242aa                                                                 |           |
| 2558669991 | DRAFT_00659 | GC             |                                                                       | 0.58      |
|            |             |                |                                                                       |           |
| 2558669992 | DRAFT_00660 | KEGG_module    | M00051: Uridine monophosphate biosynthesis, glutamine (+ PRPP) => UMP |           |
| 2558669992 | DRAFT_00660 | COG_category   | [F] Nucleotide transport and metabolism                               |           |
| 2558669992 | DRAFT_00660 | COG0167        | Dihydroorotate dehydrogenase                                          | 2.00E-71  |
| 2558669992 | DRAFT_00660 | pfam01180      | DHO_dh                                                                | 3.40E-57  |
| 2558669992 | DRAFT_00660 | EC:1.3.98.1    | Dihydroorotate oxidase (fumarate).                                    |           |
| 2558669992 | DRAFT_00660 | TIGR01037      | dihydroorotate dehydrogenase (subfamily 1) family protein             | 8.90E-106 |
| 2558669992 | DRAFT_00660 | KO:K00226      | dihydroorotate dehydrogenase (fumarate) [EC:1.3.98.1]                 | 0.00E+00  |
| 2558669992 | DRAFT_00660 | Locus_type     | CDS                                                                   |           |
| 2558669992 | DRAFT_00660 | Product_name   | dihydroorotate oxidase B, catalytic subunit (EC 1.3.3.1)              |           |
| 2558669992 | DRAFT_00660 | Scaffold       | DRAFT_contig_70_57_len_46680_read_count_840764.9                      |           |
| 2558669992 | DRAFT_00660 | Coordinates    | 23971..24894(-)                                                       |           |
| 2558669992 | DRAFT_00660 | DNA_length     | 924bp                                                                 |           |
| 2558669992 | DRAFT_00660 | Protein_length | 307aa                                                                 |           |
| 2558669992 | DRAFT_00660 | GC             |                                                                       | 0.59      |
|            |             |                |                                                                       |           |
| 2558669993 | DRAFT_00661 | KEGG_module    | M00051: Uridine monophosphate biosynthesis, glutamine (+ PRPP) => UMP |           |
| 2558669993 | DRAFT_00661 | Metacyc        | PWY-5686: UMP biosynthesis                                            |           |
| 2558669993 | DRAFT_00661 | IMG_pathway    | 321: Uridine 5'-monophosphate biosynthesis                            |           |
| 2558669993 | DRAFT_00661 | COG_category   | [F] Nucleotide transport and metabolism                               |           |
| 2558669993 | DRAFT_00661 | COG0461        | Orotate phosphoribosyltransferase                                     | 3.00E-43  |
| 2558669993 | DRAFT_00661 | pfam00156      | Pribosyltran                                                          | 2.00E-14  |
| 2558669993 | DRAFT_00661 | EC:2.4.2.10    | Orotate phosphoribosyltransferase.                                    |           |
| 2558669993 | DRAFT_00661 | TIGR00336      | orotate phosphoribosyltransferase                                     | 1.80E-44  |
| 2558669993 | DRAFT_00661 | KO:K00762      | orotate phosphoribosyltransferase [EC:2.4.2.10]                       | 8.30E-44  |
| 2558669993 | DRAFT_00661 | ITERM:01392    | orotate phosphoribosyltransferase (EC 2.4.2.10)                       |           |
| 2558669993 | DRAFT_00661 | Locus_type     | CDS                                                                   |           |
| 2558669993 | DRAFT_00661 | Product_name   | orotate phosphoribosyltransferase (EC 2.4.2.10)                       |           |
| 2558669993 | DRAFT_00661 | Scaffold       | DRAFT_contig_70_57_len_46680_read_count_840764.9                      |           |
| 2558669993 | DRAFT_00661 | Coordinates    | 24918..25544(-)                                                       |           |

|            |             |                |                                                  |          |
|------------|-------------|----------------|--------------------------------------------------|----------|
| 2558669993 | DRAFT_00661 | DNA_length     | 627bp                                            |          |
| 2558669993 | DRAFT_00661 | Protein_length | 208aa                                            |          |
| 2558669993 | DRAFT_00661 | GC             |                                                  | 0.57     |
| 2558669994 | DRAFT_00662 | Locus_type     | CDS                                              |          |
| 2558669994 | DRAFT_00662 | Product_name   | hypothetical protein                             |          |
| 2558669994 | DRAFT_00662 | Scaffold       | DRAFT_contig_70_57_len_46680_read_count_840764.9 |          |
| 2558669994 | DRAFT_00662 | Coordinates    | 25570..26289(-)                                  |          |
| 2558669994 | DRAFT_00662 | DNA_length     | 720bp                                            |          |
| 2558669994 | DRAFT_00662 | Protein_length | 239aa                                            |          |
| 2558669994 | DRAFT_00662 | GC             |                                                  | 0.55     |
| 2558669995 | DRAFT_00663 | COG_category   | [R] General function prediction only             |          |
| 2558669995 | DRAFT_00663 | COG1926        | Predicted phosphoribosyltransferases             | 8.00E-53 |
| 2558669995 | DRAFT_00663 | pfam00156      | Pribosyltran                                     | 1.30E-27 |
| 2558669995 | DRAFT_00663 | Locus_type     | CDS                                              |          |
| 2558669995 | DRAFT_00663 | Product_name   | Predicted phosphoribosyltransferases             |          |
| 2558669995 | DRAFT_00663 | Scaffold       | DRAFT_contig_70_57_len_46680_read_count_840764.9 |          |
| 2558669995 | DRAFT_00663 | Coordinates    | 26334..26987(-)                                  |          |
| 2558669995 | DRAFT_00663 | DNA_length     | 654bp                                            |          |
| 2558669995 | DRAFT_00663 | Protein_length | 217aa                                            |          |
| 2558669995 | DRAFT_00663 | GC             |                                                  | 0.59     |
| 2558669996 | DRAFT_00664 | Locus_type     | CDS                                              |          |
| 2558669996 | DRAFT_00664 | Product_name   | hypothetical protein                             |          |
| 2558669996 | DRAFT_00664 | Scaffold       | DRAFT_contig_70_57_len_46680_read_count_840764.9 |          |
| 2558669996 | DRAFT_00664 | Coordinates    | 27361..27489(-)                                  |          |
| 2558669996 | DRAFT_00664 | DNA_length     | 129bp                                            |          |
| 2558669996 | DRAFT_00664 | Protein_length | 42aa                                             |          |
| 2558669996 | DRAFT_00664 | GC             |                                                  | 0.5      |
| 2558669997 | DRAFT_00665 | Locus_type     | CDS                                              |          |
| 2558669997 | DRAFT_00665 | Product_name   | hypothetical protein                             |          |
| 2558669997 | DRAFT_00665 | Scaffold       | DRAFT_contig_70_57_len_46680_read_count_840764.9 |          |



|            |             |                |        |                                                                      |          |
|------------|-------------|----------------|--------|----------------------------------------------------------------------|----------|
| 2558669997 | DRAFT_00665 | Coordinates    |        | 28022..28324(-)                                                      |          |
| 2558669997 | DRAFT_00665 | DNA_length     |        | 303bp                                                                |          |
| 2558669997 | DRAFT_00665 | Protein_length |        | 100aa                                                                |          |
| 2558669997 | DRAFT_00665 | GC             |        |                                                                      | 0.56     |
| 2558669997 | DRAFT_00665 | Transmembrane  |        | Yes                                                                  |          |
| 2558669998 | DRAFT_00666 | Locus_type     |        | CDS                                                                  |          |
| 2558669998 | DRAFT_00666 | Product_name   |        | hypothetical protein                                                 |          |
| 2558669998 | DRAFT_00666 | Scaffold       |        | DRAFT_contig_70_57_len_46680_read_count_840764.9                     |          |
| 2558669998 | DRAFT_00666 | Coordinates    |        | 28475..28717(+)                                                      |          |
| 2558669998 | DRAFT_00666 | DNA_length     |        | 243bp                                                                |          |
| 2558669998 | DRAFT_00666 | Protein_length |        | 80aa                                                                 |          |
| 2558669998 | DRAFT_00666 | GC             |        |                                                                      | 0.56     |
| 2558669998 | DRAFT_00666 | Transmembrane  |        | Yes                                                                  |          |
| 2558669999 | DRAFT_00667 | pfam00571      | CBS    |                                                                      | 3.20E-13 |
| 2558669999 | DRAFT_00667 | pfam00571      | CBS    |                                                                      | 1.90E-14 |
| 2558669999 | DRAFT_00667 | Locus_type     |        | CDS                                                                  |          |
| 2558669999 | DRAFT_00667 | Product_name   |        | Predicted signal-transduction protein containing cAMP-binding and CI |          |
| 2558669999 | DRAFT_00667 | Scaffold       |        | DRAFT_contig_70_57_len_46680_read_count_840764.9                     |          |
| 2558669999 | DRAFT_00667 | Coordinates    |        | 28896..29414(-)                                                      |          |
| 2558669999 | DRAFT_00667 | DNA_length     |        | 519bp                                                                |          |
| 2558669999 | DRAFT_00667 | Protein_length |        | 172aa                                                                |          |
| 2558669999 | DRAFT_00667 | GC             |        |                                                                      | 0.56     |
| 2558670000 | DRAFT_00668 | Locus_type     |        | CDS                                                                  |          |
| 2558670000 | DRAFT_00668 | Product_name   |        | hypothetical protein                                                 |          |
| 2558670000 | DRAFT_00668 | Scaffold       |        | DRAFT_contig_70_57_len_46680_read_count_840764.9                     |          |
| 2558670000 | DRAFT_00668 | Coordinates    |        | 29550..30332(+)                                                      |          |
| 2558670000 | DRAFT_00668 | DNA_length     |        | 783bp                                                                |          |
| 2558670000 | DRAFT_00668 | Protein_length |        | 260aa                                                                |          |
| 2558670000 | DRAFT_00668 | GC             |        |                                                                      | 0.51     |
| 2558670001 | DRAFT_00669 | pfam00254      | FKBP_C |                                                                      | 5.50E-23 |

|            |             |                |                      |                                                  |          |
|------------|-------------|----------------|----------------------|--------------------------------------------------|----------|
| 2558670001 | DRAFT_00669 | Locus_type     |                      | CDS                                              |          |
| 2558670001 | DRAFT_00669 | Product_name   |                      | FKBP-type peptidyl-prolyl cis-trans isomerases 2 |          |
| 2558670001 | DRAFT_00669 | Scaffold       |                      | DRAFT_contig_70_57_len_46680_read_count_840764.9 |          |
| 2558670001 | DRAFT_00669 | Coordinates    |                      | 30841..31257(+)                                  |          |
| 2558670001 | DRAFT_00669 | DNA_length     |                      | 417bp                                            |          |
| 2558670001 | DRAFT_00669 | Protein_length |                      | 138aa                                            |          |
| 2558670001 | DRAFT_00669 | GC             |                      |                                                  | 0.59     |
|            |             |                |                      |                                                  |          |
| 2558670002 | DRAFT_00670 | Locus_type     |                      | CDS                                              |          |
| 2558670002 | DRAFT_00670 | Product_name   |                      | hypothetical protein                             |          |
| 2558670002 | DRAFT_00670 | Scaffold       |                      | DRAFT_contig_70_57_len_46680_read_count_840764.9 |          |
| 2558670002 | DRAFT_00670 | Coordinates    |                      | 31358..31639(+)                                  |          |
| 2558670002 | DRAFT_00670 | DNA_length     |                      | 282bp                                            |          |
| 2558670002 | DRAFT_00670 | Protein_length |                      | 93aa                                             |          |
| 2558670002 | DRAFT_00670 | GC             |                      |                                                  | 0.56     |
|            |             |                |                      |                                                  |          |
| 2558670003 | DRAFT_00671 | pfam01780      | Ribosomal_L37ae      |                                                  | 7.60E-05 |
| 2558670003 | DRAFT_00671 | Locus_type     |                      | CDS                                              |          |
| 2558670003 | DRAFT_00671 | Product_name   |                      | Ribosomal L37ae protein family                   |          |
| 2558670003 | DRAFT_00671 | Scaffold       |                      | DRAFT_contig_70_57_len_46680_read_count_840764.9 |          |
| 2558670003 | DRAFT_00671 | Coordinates    |                      | 31682..31873(+)                                  |          |
| 2558670003 | DRAFT_00671 | DNA_length     |                      | 192bp                                            |          |
| 2558670003 | DRAFT_00671 | Protein_length |                      | 63aa                                             |          |
| 2558670003 | DRAFT_00671 | GC             |                      |                                                  | 0.6      |
|            |             |                |                      |                                                  |          |
| 2558670004 | DRAFT_00672 | Locus_type     |                      | CDS                                              |          |
| 2558670004 | DRAFT_00672 | Product_name   |                      | hypothetical protein                             |          |
| 2558670004 | DRAFT_00672 | Scaffold       |                      | DRAFT_contig_70_57_len_46680_read_count_840764.9 |          |
| 2558670004 | DRAFT_00672 | Coordinates    |                      | 31987..32208(-)                                  |          |
| 2558670004 | DRAFT_00672 | DNA_length     |                      | 222bp                                            |          |
| 2558670004 | DRAFT_00672 | Protein_length |                      | 73aa                                             |          |
| 2558670004 | DRAFT_00672 | GC             |                      |                                                  | 0.58     |
|            |             |                |                      |                                                  |          |
| 2558670005 | DRAFT_00673 | COG_category   | [S] Function unknown |                                                  |          |

|            |             |                |                                                              |          |
|------------|-------------|----------------|--------------------------------------------------------------|----------|
| 2558670005 | DRAFT_00673 | COG4260        | Putative virion core protein (lumpy skin disease virus)      | 5.00E-38 |
| 2558670005 | DRAFT_00673 | pfam12773      | DZR                                                          | 3.30E-10 |
| 2558670005 | DRAFT_00673 | pfam13421      | Band_7_1                                                     | 2.70E-37 |
| 2558670005 | DRAFT_00673 | Locus_type     | CDS                                                          |          |
| 2558670005 | DRAFT_00673 | Product_name   | Putative virion core protein (lumpy skin disease virus)      |          |
| 2558670005 | DRAFT_00673 | Scaffold       | DRAFT_contig_70_57_len_46680_read_count_840764.9             |          |
| 2558670005 | DRAFT_00673 | Coordinates    | 32412..33485(-)                                              |          |
| 2558670005 | DRAFT_00673 | DNA_length     | 1074bp                                                       |          |
| 2558670005 | DRAFT_00673 | Protein_length | 357aa                                                        |          |
| 2558670005 | DRAFT_00673 | GC             |                                                              | 0.56     |
| 2558670006 | DRAFT_00674 | Locus_type     | CDS                                                          |          |
| 2558670006 | DRAFT_00674 | Product_name   | hypothetical protein                                         |          |
| 2558670006 | DRAFT_00674 | Scaffold       | DRAFT_contig_70_57_len_46680_read_count_840764.9             |          |
| 2558670006 | DRAFT_00674 | Coordinates    | 33497..34042(-)                                              |          |
| 2558670006 | DRAFT_00674 | DNA_length     | 546bp                                                        |          |
| 2558670006 | DRAFT_00674 | Protein_length | 181aa                                                        |          |
| 2558670006 | DRAFT_00674 | GC             |                                                              | 0.57     |
| 2558670007 | DRAFT_00675 | pfam01904      | DUF72                                                        | 4.20E-22 |
| 2558670007 | DRAFT_00675 | Locus_type     | CDS                                                          |          |
| 2558670007 | DRAFT_00675 | Product_name   | Uncharacterized conserved protein                            |          |
| 2558670007 | DRAFT_00675 | Scaffold       | DRAFT_contig_70_57_len_46680_read_count_840764.9             |          |
| 2558670007 | DRAFT_00675 | Coordinates    | 34122..34418(+)                                              |          |
| 2558670007 | DRAFT_00675 | DNA_length     | 297bp                                                        |          |
| 2558670007 | DRAFT_00675 | Protein_length | 98aa                                                         |          |
| 2558670007 | DRAFT_00675 | GC             |                                                              | 0.53     |
| 2558670008 | DRAFT_00676 | pfam11799      | IMS_C                                                        | 6.60E-20 |
| 2558670008 | DRAFT_00676 | Locus_type     | CDS                                                          |          |
| 2558670008 | DRAFT_00676 | Product_name   | Nucleotidyltransferase/DNA polymerase involved in DNA repair |          |
| 2558670008 | DRAFT_00676 | Scaffold       | DRAFT_contig_70_57_len_46680_read_count_840764.9             |          |
| 2558670008 | DRAFT_00676 | Coordinates    | 34532..35218(+)                                              |          |
| 2558670008 | DRAFT_00676 | DNA_length     | 687bp                                                        |          |

|            |             |                |                                                                  |          |
|------------|-------------|----------------|------------------------------------------------------------------|----------|
| 2558670008 | DRAFT_00676 | Protein_length | 228aa                                                            |          |
| 2558670008 | DRAFT_00676 | GC             |                                                                  | 0.61     |
| 2558670009 | DRAFT_00677 | COG_category   | [G] Carbohydrate transport and metabolism                        |          |
| 2558670009 | DRAFT_00677 | COG2814        | Arabinose efflux permease                                        | 3.00E-08 |
| 2558670009 | DRAFT_00677 | pfam07690      | MFS_1                                                            | 8.30E-27 |
| 2558670009 | DRAFT_00677 | Locus_type     | CDS                                                              |          |
| 2558670009 | DRAFT_00677 | Product_name   | Arabinose efflux permease                                        |          |
| 2558670009 | DRAFT_00677 | Scaffold       | DRAFT_contig_70_57_len_46680_read_count_840764.9                 |          |
| 2558670009 | DRAFT_00677 | Coordinates    | 35167..36426(-)                                                  |          |
| 2558670009 | DRAFT_00677 | DNA_length     | 1260bp                                                           |          |
| 2558670009 | DRAFT_00677 | Protein_length | 419aa                                                            |          |
| 2558670009 | DRAFT_00677 | GC             |                                                                  | 0.59     |
| 2558670009 | DRAFT_00677 | Transmembrane  | Yes                                                              |          |
| 2558670010 | DRAFT_00678 | Metacyc        | PWY-4722: creatinine degradation II                              |          |
| 2558670010 | DRAFT_00678 | COG_category   | [E] Amino acid transport and metabolism                          |          |
| 2558670010 | DRAFT_00678 | COG_category   | [Q] Secondary metabolites biosynthesis, transport and catabolism |          |
| 2558670010 | DRAFT_00678 | COG0145        | N-methylhydantoinase A/acetone carboxylase, beta subunit         | 0.00E+00 |
| 2558670010 | DRAFT_00678 | pfam05378      | Hydant_A_N                                                       | 2.80E-45 |
| 2558670010 | DRAFT_00678 | pfam01968      | Hydantoinase_A                                                   | 5.00E-86 |
| 2558670010 | DRAFT_00678 | EC:3.5.2.14    | N-methylhydantoinase (ATP-hydrolyzing).                          |          |
| 2558670010 | DRAFT_00678 | KO:K01473      | N-methylhydantoinase A [EC:3.5.2.14]                             | 0.00E+00 |
| 2558670010 | DRAFT_00678 | Locus_type     | CDS                                                              |          |
| 2558670010 | DRAFT_00678 | Product_name   | N-methylhydantoinase A/acetone carboxylase, beta subunit         |          |
| 2558670010 | DRAFT_00678 | Scaffold       | DRAFT_contig_70_57_len_46680_read_count_840764.9                 |          |
| 2558670010 | DRAFT_00678 | Coordinates    | 36513..38594(+)                                                  |          |
| 2558670010 | DRAFT_00678 | DNA_length     | 2082bp                                                           |          |
| 2558670010 | DRAFT_00678 | Protein_length | 693aa                                                            |          |
| 2558670010 | DRAFT_00678 | GC             |                                                                  | 0.63     |
| 2558670011 | DRAFT_00679 | Metacyc        | PWY-4722: creatinine degradation II                              |          |
| 2558670011 | DRAFT_00679 | COG_category   | [E] Amino acid transport and metabolism                          |          |
| 2558670011 | DRAFT_00679 | COG_category   | [Q] Secondary metabolites biosynthesis, transport and catabolism |          |

|            |             |                |                                                           |          |
|------------|-------------|----------------|-----------------------------------------------------------|----------|
| 2558670011 | DRAFT_00679 | COG0146        | N-methylhydantoinase B/acetone carboxylase, alpha subunit | 0.00E+00 |
| 2558670011 | DRAFT_00679 | pfam02538      | Hydantoinase_B                                            | 0.00E+00 |
| 2558670011 | DRAFT_00679 | EC:3.5.2.14    | N-methylhydantoinase (ATP-hydrolyzing).                   |          |
| 2558670011 | DRAFT_00679 | KO:K01474      | N-methylhydantoinase B [EC:3.5.2.14]                      | 0.00E+00 |
| 2558670011 | DRAFT_00679 | Locus_type     | CDS                                                       |          |
| 2558670011 | DRAFT_00679 | Product_name   | N-methylhydantoinase B/acetone carboxylase, alpha subunit |          |
| 2558670011 | DRAFT_00679 | Scaffold       | DRAFT_contig_70_57_len_46680_read_count_840764.9          |          |
| 2558670011 | DRAFT_00679 | Coordinates    | 38591..40279(+)                                           |          |
| 2558670011 | DRAFT_00679 | DNA_length     | 1689bp                                                    |          |
| 2558670011 | DRAFT_00679 | Protein_length | 562aa                                                     |          |
| 2558670011 | DRAFT_00679 | GC             |                                                           | 0.62     |
| 2558670012 | DRAFT_00680 | Locus_type     | CDS                                                       |          |
| 2558670012 | DRAFT_00680 | Product_name   | hypothetical protein                                      |          |
| 2558670012 | DRAFT_00680 | Scaffold       | DRAFT_contig_70_57_len_46680_read_count_840764.9          |          |
| 2558670012 | DRAFT_00680 | Coordinates    | 40314..40496(-)                                           |          |
| 2558670012 | DRAFT_00680 | DNA_length     | 183bp                                                     |          |
| 2558670012 | DRAFT_00680 | Protein_length | 60aa                                                      |          |
| 2558670012 | DRAFT_00680 | GC             |                                                           | 0.52     |
| 2558670012 | DRAFT_00680 | Transmembrane  | Yes                                                       |          |
| 2558670013 | DRAFT_00681 | Locus_type     | CDS                                                       |          |
| 2558670013 | DRAFT_00681 | Product_name   | hypothetical protein                                      |          |
| 2558670013 | DRAFT_00681 | Scaffold       | DRAFT_contig_70_57_len_46680_read_count_840764.9          |          |
| 2558670013 | DRAFT_00681 | Coordinates    | 40671..40847(-)                                           |          |
| 2558670013 | DRAFT_00681 | DNA_length     | 177bp                                                     |          |
| 2558670013 | DRAFT_00681 | Protein_length | 58aa                                                      |          |
| 2558670013 | DRAFT_00681 | GC             |                                                           | 0.53     |
| 2558670014 | DRAFT_00682 | COG_category   | [S] Function unknown                                      |          |
| 2558670014 | DRAFT_00682 | COG0062        | Uncharacterized conserved protein                         | 3.00E-39 |
| 2558670014 | DRAFT_00682 | pfam03853      | YjeF_N                                                    | 8.10E-40 |
| 2558670014 | DRAFT_00682 | TIGR00197      | yjeF N-terminal region                                    | 8.50E-45 |
| 2558670014 | DRAFT_00682 | Locus_type     | CDS                                                       |          |

|            |             |                |                                                                 |          |
|------------|-------------|----------------|-----------------------------------------------------------------|----------|
| 2558670014 | DRAFT_00682 | Product_name   | yjeF N-terminal region                                          |          |
| 2558670014 | DRAFT_00682 | Scaffold       | DRAFT_contig_70_57_len_46680_read_count_840764.9                |          |
| 2558670014 | DRAFT_00682 | Coordinates    | 40941..41651(-)                                                 |          |
| 2558670014 | DRAFT_00682 | DNA_length     | 711bp                                                           |          |
| 2558670014 | DRAFT_00682 | Protein_length | 236aa                                                           |          |
| 2558670014 | DRAFT_00682 | GC             |                                                                 | 0.58     |
|            |             |                |                                                                 |          |
| 2558670015 | DRAFT_00683 | Locus_type     | CDS                                                             |          |
| 2558670015 | DRAFT_00683 | Product_name   | hypothetical protein                                            |          |
| 2558670015 | DRAFT_00683 | Scaffold       | DRAFT_contig_70_57_len_46680_read_count_840764.9                |          |
| 2558670015 | DRAFT_00683 | Coordinates    | 41931..45953(+)                                                 |          |
| 2558670015 | DRAFT_00683 | DNA_length     | 4023bp                                                          |          |
| 2558670015 | DRAFT_00683 | Protein_length | 1340aa                                                          |          |
| 2558670015 | DRAFT_00683 | GC             |                                                                 | 0.58     |
| 2558670015 | DRAFT_00683 | Transmembrane  | Yes                                                             |          |
|            |             |                |                                                                 |          |
| 2558670016 | DRAFT_00684 | COG_category   | [N] Cell motility                                               |          |
| 2558670016 | DRAFT_00684 | COG5491        | Conserved protein implicated in secretion                       | 1.00E-14 |
| 2558670016 | DRAFT_00684 | Locus_type     | CDS                                                             |          |
| 2558670016 | DRAFT_00684 | Product_name   | Conserved protein implicated in secretion                       |          |
| 2558670016 | DRAFT_00684 | Scaffold       | DRAFT_contig_70_57_len_46680_read_count_840764.9                |          |
| 2558670016 | DRAFT_00684 | Coordinates    | 46059..46679(+)                                                 |          |
| 2558670016 | DRAFT_00684 | DNA_length     | 621bp                                                           |          |
| 2558670016 | DRAFT_00684 | Protein_length | 207aa                                                           |          |
| 2558670016 | DRAFT_00684 | GC             |                                                                 | 0.58     |
|            |             |                |                                                                 |          |
| 2558670017 | DRAFT_00685 | pfam07726      | AAA_3                                                           | 5.00E-62 |
| 2558670017 | DRAFT_00685 | Locus_type     | CDS                                                             |          |
| 2558670017 | DRAFT_00685 | Product_name   | ATPase family associated with various cellular activities (AAA) |          |
| 2558670017 | DRAFT_00685 | Scaffold       | DRAFT_contig_70_60_len_46101_read_count_777516.10               |          |
| 2558670017 | DRAFT_00685 | Coordinates    | 2..625(-)                                                       |          |
| 2558670017 | DRAFT_00685 | DNA_length     | 624bp                                                           |          |
| 2558670017 | DRAFT_00685 | Protein_length | 208aa                                                           |          |
| 2558670017 | DRAFT_00685 | GC             |                                                                 | 0.59     |

|            |             |                |                                               |                                                   |           |
|------------|-------------|----------------|-----------------------------------------------|---------------------------------------------------|-----------|
| 2558670018 | DRAFT_00686 | Locus_type     |                                               | CDS                                               |           |
| 2558670018 | DRAFT_00686 | Product_name   |                                               | hypothetical protein                              |           |
| 2558670018 | DRAFT_00686 | Scaffold       |                                               | DRAFT_contig_70_60_len_46101_read_count_777516.10 |           |
| 2558670018 | DRAFT_00686 | Coordinates    |                                               | 710..1156(-)                                      |           |
| 2558670018 | DRAFT_00686 | DNA_length     |                                               | 447bp                                             |           |
| 2558670018 | DRAFT_00686 | Protein_length |                                               | 148aa                                             |           |
| 2558670018 | DRAFT_00686 | GC             |                                               |                                                   | 0.62      |
| 2558670018 | DRAFT_00686 | Transmembrane  |                                               | Yes                                               |           |
| 2558670019 | DRAFT_00687 | pfam13559      | DUF4129                                       |                                                   | 7.30E-06  |
| 2558670019 | DRAFT_00687 | Locus_type     |                                               | CDS                                               |           |
| 2558670019 | DRAFT_00687 | Product_name   |                                               | Domain of unknown function (DUF4129)              |           |
| 2558670019 | DRAFT_00687 | Scaffold       |                                               | DRAFT_contig_70_60_len_46101_read_count_777516.10 |           |
| 2558670019 | DRAFT_00687 | Coordinates    |                                               | 1143..1862(-)                                     |           |
| 2558670019 | DRAFT_00687 | DNA_length     |                                               | 720bp                                             |           |
| 2558670019 | DRAFT_00687 | Protein_length |                                               | 239aa                                             |           |
| 2558670019 | DRAFT_00687 | GC             |                                               |                                                   | 0.58      |
| 2558670019 | DRAFT_00687 | Transmembrane  |                                               | Yes                                               |           |
| 2558670020 | DRAFT_00688 | Metacyc        | PWY-6549: glutamine biosynthesis III          |                                                   |           |
| 2558670020 | DRAFT_00688 | Metacyc        | PWY-5675: nitrate reduction V (assimilatory)  |                                                   |           |
| 2558670020 | DRAFT_00688 | Metacyc        | GLNSYN-PWY: glutamine biosynthesis I          |                                                   |           |
| 2558670020 | DRAFT_00688 | Metacyc        | PWY-6963: ammonia assimilation cycle I        |                                                   |           |
| 2558670020 | DRAFT_00688 | Metacyc        | PWY490-3: nitrate reduction VI (assimilatory) |                                                   |           |
| 2558670020 | DRAFT_00688 | Metacyc        | PWY-6964: ammonia assimilation cycle II       |                                                   |           |
| 2558670020 | DRAFT_00688 | Metacyc        | PWY-381: nitrate reduction II (assimilatory)  |                                                   |           |
| 2558670020 | DRAFT_00688 | COG_category   | [E] Amino acid transport and metabolism       |                                                   |           |
| 2558670020 | DRAFT_00688 | COG0174        | Glutamine synthetase                          |                                                   | 9.00E-120 |
| 2558670020 | DRAFT_00688 | pfam00120      | Gln-synt_C                                    |                                                   | 6.10E-83  |
| 2558670020 | DRAFT_00688 | pfam03951      | Gln-synt_N                                    |                                                   | 1.10E-25  |
| 2558670020 | DRAFT_00688 | EC:6.3.1.2     | Glutamate--ammonia ligase.                    |                                                   |           |
| 2558670020 | DRAFT_00688 | TIGR00653      | glutamine synthetase, type I                  |                                                   | 0.00E+00  |
| 2558670020 | DRAFT_00688 | KO:K01915      | glutamine synthetase [EC:6.3.1.2]             |                                                   | 0.00E+00  |

|            |             |                |                                                   |      |
|------------|-------------|----------------|---------------------------------------------------|------|
| 2558670020 | DRAFT_00688 | Locus_type     | CDS                                               |      |
| 2558670020 | DRAFT_00688 | Product_name   | glutamine synthetase, type I                      |      |
| 2558670020 | DRAFT_00688 | Scaffold       | DRAFT_contig_70_60_len_46101_read_count_777516.10 |      |
| 2558670020 | DRAFT_00688 | Coordinates    | 2174..3646(-)                                     |      |
| 2558670020 | DRAFT_00688 | DNA_length     | 1473bp                                            |      |
| 2558670020 | DRAFT_00688 | Protein_length | 490aa                                             |      |
| 2558670020 | DRAFT_00688 | GC             |                                                   | 0.59 |
|            |             |                |                                                   |      |
| 2558670021 | DRAFT_00689 | Locus_type     | CDS                                               |      |
| 2558670021 | DRAFT_00689 | Product_name   | hypothetical protein                              |      |
| 2558670021 | DRAFT_00689 | Scaffold       | DRAFT_contig_70_60_len_46101_read_count_777516.10 |      |
| 2558670021 | DRAFT_00689 | Coordinates    | 3832..4344(+)                                     |      |
| 2558670021 | DRAFT_00689 | DNA_length     | 513bp                                             |      |
| 2558670021 | DRAFT_00689 | Protein_length | 170aa                                             |      |
| 2558670021 | DRAFT_00689 | GC             |                                                   | 0.6  |
|            |             |                |                                                   |      |
| 2558670022 | DRAFT_00690 | Locus_type     | CDS                                               |      |
| 2558670022 | DRAFT_00690 | Product_name   | hypothetical protein                              |      |
| 2558670022 | DRAFT_00690 | Scaffold       | DRAFT_contig_70_60_len_46101_read_count_777516.10 |      |
| 2558670022 | DRAFT_00690 | Coordinates    | 4385..4909(+)                                     |      |
| 2558670022 | DRAFT_00690 | DNA_length     | 525bp                                             |      |
| 2558670022 | DRAFT_00690 | Protein_length | 174aa                                             |      |
| 2558670022 | DRAFT_00690 | GC             |                                                   | 0.58 |
|            |             |                |                                                   |      |
| 2558670023 | DRAFT_00691 | Locus_type     | CDS                                               |      |
| 2558670023 | DRAFT_00691 | Product_name   | hypothetical protein                              |      |
| 2558670023 | DRAFT_00691 | Scaffold       | DRAFT_contig_70_60_len_46101_read_count_777516.10 |      |
| 2558670023 | DRAFT_00691 | Coordinates    | 4973..6058(-)                                     |      |
| 2558670023 | DRAFT_00691 | DNA_length     | 1086bp                                            |      |
| 2558670023 | DRAFT_00691 | Protein_length | 361aa                                             |      |
| 2558670023 | DRAFT_00691 | GC             |                                                   | 0.55 |
| 2558670023 | DRAFT_00691 | Transmembrane  | Yes                                               |      |
|            |             |                |                                                   |      |
| 2558670024 | DRAFT_00692 | Locus_type     | CDS                                               |      |



|            |             |                |                                                   |          |
|------------|-------------|----------------|---------------------------------------------------|----------|
| 2558670024 | DRAFT_00692 | Product_name   | hypothetical protein                              |          |
| 2558670024 | DRAFT_00692 | Scaffold       | DRAFT_contig_70_60_len_46101_read_count_777516.10 |          |
| 2558670024 | DRAFT_00692 | Coordinates    | 6216..6644(-)                                     |          |
| 2558670024 | DRAFT_00692 | DNA_length     | 429bp                                             |          |
| 2558670024 | DRAFT_00692 | Protein_length | 142aa                                             |          |
| 2558670024 | DRAFT_00692 | GC             |                                                   | 0.61     |
|            |             |                |                                                   |          |
| 2558670025 | DRAFT_00693 | Locus_type     | CDS                                               |          |
| 2558670025 | DRAFT_00693 | Product_name   | hypothetical protein                              |          |
| 2558670025 | DRAFT_00693 | Scaffold       | DRAFT_contig_70_60_len_46101_read_count_777516.10 |          |
| 2558670025 | DRAFT_00693 | Coordinates    | 6844..7839(+)                                     |          |
| 2558670025 | DRAFT_00693 | DNA_length     | 996bp                                             |          |
| 2558670025 | DRAFT_00693 | Protein_length | 331aa                                             |          |
| 2558670025 | DRAFT_00693 | GC             |                                                   | 0.6      |
|            |             |                |                                                   |          |
| 2558670026 | DRAFT_00694 | COG_category   | [R] General function prediction only              |          |
| 2558670026 | DRAFT_00694 | COG0433        | Predicted ATPase                                  | 1.00E-09 |
| 2558670026 | DRAFT_00694 | pfam01935      | DUF87                                             | 3.90E-07 |
| 2558670026 | DRAFT_00694 | pfam12846      | AAA_10                                            | 6.50E-07 |
| 2558670026 | DRAFT_00694 | Locus_type     | CDS                                               |          |
| 2558670026 | DRAFT_00694 | Product_name   | Predicted ATPase                                  |          |
| 2558670026 | DRAFT_00694 | Scaffold       | DRAFT_contig_70_60_len_46101_read_count_777516.10 |          |
| 2558670026 | DRAFT_00694 | Coordinates    | 7948..9303(+)                                     |          |
| 2558670026 | DRAFT_00694 | DNA_length     | 1356bp                                            |          |
| 2558670026 | DRAFT_00694 | Protein_length | 451aa                                             |          |
| 2558670026 | DRAFT_00694 | GC             |                                                   | 0.61     |
|            |             |                |                                                   |          |
| 2558670027 | DRAFT_00695 | COG_category   | [M] Cell wall/membrane/envelope biogenesis        |          |
| 2558670027 | DRAFT_00695 | COG1247        | Sortase and related acyltransferases              | 2.00E-06 |
| 2558670027 | DRAFT_00695 | pfam00583      | Acetyltransf_1                                    | 3.20E-14 |
| 2558670027 | DRAFT_00695 | Locus_type     | CDS                                               |          |
| 2558670027 | DRAFT_00695 | Product_name   | Sortase and related acyltransferases              |          |
| 2558670027 | DRAFT_00695 | Scaffold       | DRAFT_contig_70_60_len_46101_read_count_777516.10 |          |
| 2558670027 | DRAFT_00695 | Coordinates    | 9405..9884(-)                                     |          |

|            |             |                |                                                            |          |
|------------|-------------|----------------|------------------------------------------------------------|----------|
| 2558670027 | DRAFT_00695 | DNA_length     | 480bp                                                      |          |
| 2558670027 | DRAFT_00695 | Protein_length | 159aa                                                      |          |
| 2558670027 | DRAFT_00695 | GC             |                                                            | 0.53     |
| 2558670028 | DRAFT_00696 | pfam04909      | Amidohydro_2                                               | 1.40E-16 |
| 2558670028 | DRAFT_00696 | Locus_type     | CDS                                                        |          |
| 2558670028 | DRAFT_00696 | Product_name   | Predicted metal-dependent hydrolase of the TIM-barrel fold |          |
| 2558670028 | DRAFT_00696 | Scaffold       | DRAFT_contig_70_60_len_46101_read_count_777516.10          |          |
| 2558670028 | DRAFT_00696 | Coordinates    | 9902..10189(-)                                             |          |
| 2558670028 | DRAFT_00696 | DNA_length     | 288bp                                                      |          |
| 2558670028 | DRAFT_00696 | Protein_length | 95aa                                                       |          |
| 2558670028 | DRAFT_00696 | GC             |                                                            | 0.5      |
| 2558670029 | DRAFT_00697 | COG_category   | [R] General function prediction only                       |          |
| 2558670029 | DRAFT_00697 | COG2159        | Predicted metal-dependent hydrolase of the TIM-barrel fold | 2.00E-32 |
| 2558670029 | DRAFT_00697 | pfam04909      | Amidohydro_2                                               | 2.10E-36 |
| 2558670029 | DRAFT_00697 | Locus_type     | CDS                                                        |          |
| 2558670029 | DRAFT_00697 | Product_name   | Predicted metal-dependent hydrolase of the TIM-barrel fold |          |
| 2558670029 | DRAFT_00697 | Scaffold       | DRAFT_contig_70_60_len_46101_read_count_777516.10          |          |
| 2558670029 | DRAFT_00697 | Coordinates    | 10784..11644(+)                                            |          |
| 2558670029 | DRAFT_00697 | DNA_length     | 861bp                                                      |          |
| 2558670029 | DRAFT_00697 | Protein_length | 286aa                                                      |          |
| 2558670029 | DRAFT_00697 | GC             |                                                            | 0.5      |
| 2558670030 | DRAFT_00698 | Locus_type     | CDS                                                        |          |
| 2558670030 | DRAFT_00698 | Product_name   | hypothetical protein                                       |          |
| 2558670030 | DRAFT_00698 | Scaffold       | DRAFT_contig_70_60_len_46101_read_count_777516.10          |          |
| 2558670030 | DRAFT_00698 | Coordinates    | 11662..11820(-)                                            |          |
| 2558670030 | DRAFT_00698 | DNA_length     | 159bp                                                      |          |
| 2558670030 | DRAFT_00698 | Protein_length | 52aa                                                       |          |
| 2558670030 | DRAFT_00698 | GC             |                                                            | 0.5      |
| 2558670031 | DRAFT_00699 | Locus_type     | CDS                                                        |          |
| 2558670031 | DRAFT_00699 | Product_name   | hypothetical protein                                       |          |

|            |             |                |                                                   |          |
|------------|-------------|----------------|---------------------------------------------------|----------|
| 2558670031 | DRAFT_00699 | Scaffold       | DRAFT_contig_70_60_len_46101_read_count_777516.10 |          |
| 2558670031 | DRAFT_00699 | Coordinates    | 12023..12298(+)                                   |          |
| 2558670031 | DRAFT_00699 | DNA_length     | 276bp                                             |          |
| 2558670031 | DRAFT_00699 | Protein_length | 91aa                                              |          |
| 2558670031 | DRAFT_00699 | GC             |                                                   | 0.51     |
|            |             |                |                                                   |          |
| 2558670032 | DRAFT_00700 | Locus_type     | CDS                                               |          |
| 2558670032 | DRAFT_00700 | Product_name   | hypothetical protein                              |          |
| 2558670032 | DRAFT_00700 | Scaffold       | DRAFT_contig_70_60_len_46101_read_count_777516.10 |          |
| 2558670032 | DRAFT_00700 | Coordinates    | 12386..12778(-)                                   |          |
| 2558670032 | DRAFT_00700 | DNA_length     | 393bp                                             |          |
| 2558670032 | DRAFT_00700 | Protein_length | 130aa                                             |          |
| 2558670032 | DRAFT_00700 | GC             |                                                   | 0.53     |
|            |             |                |                                                   |          |
| 2558670033 | DRAFT_00701 | COG_category   | [S] Function unknown                              |          |
| 2558670033 | DRAFT_00701 | COG1839        | Uncharacterized conserved protein                 | 9.00E-58 |
| 2558670033 | DRAFT_00701 | pfam04008      | Adenosine_kin                                     | 5.80E-68 |
| 2558670033 | DRAFT_00701 | KO:K09129      | hypothetical protein                              | 0.00E+00 |
| 2558670033 | DRAFT_00701 | Locus_type     | CDS                                               |          |
| 2558670033 | DRAFT_00701 | Product_name   | Uncharacterized conserved protein                 |          |
| 2558670033 | DRAFT_00701 | Scaffold       | DRAFT_contig_70_60_len_46101_read_count_777516.10 |          |
| 2558670033 | DRAFT_00701 | Coordinates    | 12953..13435(+)                                   |          |
| 2558670033 | DRAFT_00701 | DNA_length     | 483bp                                             |          |
| 2558670033 | DRAFT_00701 | Protein_length | 160aa                                             |          |
| 2558670033 | DRAFT_00701 | GC             |                                                   | 0.59     |
|            |             |                |                                                   |          |
| 2558670034 | DRAFT_00702 | Locus_type     | CDS                                               |          |
| 2558670034 | DRAFT_00702 | Product_name   | hypothetical protein                              |          |
| 2558670034 | DRAFT_00702 | Scaffold       | DRAFT_contig_70_60_len_46101_read_count_777516.10 |          |
| 2558670034 | DRAFT_00702 | Coordinates    | 13530..13772(-)                                   |          |
| 2558670034 | DRAFT_00702 | DNA_length     | 243bp                                             |          |
| 2558670034 | DRAFT_00702 | Protein_length | 80aa                                              |          |
| 2558670034 | DRAFT_00702 | GC             |                                                   | 0.47     |
| 2558670034 | DRAFT_00702 | Transmembrane  | Yes                                               |          |

|            |             |                |                                                   |          |
|------------|-------------|----------------|---------------------------------------------------|----------|
| 2558670035 | DRAFT_00703 | COG_category   | [L] Replication, recombination and repair         |          |
| 2558670035 | DRAFT_00703 | COG3316        | Transposase and inactivated derivatives           | 1.00E-12 |
| 2558670035 | DRAFT_00703 | pfam13610      | DDE_Tnp_IS240                                     | 2.40E-21 |
| 2558670035 | DRAFT_00703 | Locus_type     | CDS                                               |          |
| 2558670035 | DRAFT_00703 | Product_name   | Transposase and inactivated derivatives           |          |
| 2558670035 | DRAFT_00703 | Scaffold       | DRAFT_contig_70_60_len_46101_read_count_777516.10 |          |
| 2558670035 | DRAFT_00703 | Coordinates    | 13782..15014(-)                                   |          |
| 2558670035 | DRAFT_00703 | DNA_length     | 1233bp                                            |          |
| 2558670035 | DRAFT_00703 | Protein_length | 410aa                                             |          |
| 2558670035 | DRAFT_00703 | GC             |                                                   | 0.55     |
| 2558670036 | DRAFT_00704 | Locus_type     | CDS                                               |          |
| 2558670036 | DRAFT_00704 | Product_name   | hypothetical protein                              |          |
| 2558670036 | DRAFT_00704 | Scaffold       | DRAFT_contig_70_60_len_46101_read_count_777516.10 |          |
| 2558670036 | DRAFT_00704 | Coordinates    | 15033..15254(+)                                   |          |
| 2558670036 | DRAFT_00704 | DNA_length     | 222bp                                             |          |
| 2558670036 | DRAFT_00704 | Protein_length | 73aa                                              |          |
| 2558670036 | DRAFT_00704 | GC             |                                                   | 0.49     |
| 2558670037 | DRAFT_00705 | Locus_type     | CDS                                               |          |
| 2558670037 | DRAFT_00705 | Product_name   | hypothetical protein                              |          |
| 2558670037 | DRAFT_00705 | Scaffold       | DRAFT_contig_70_60_len_46101_read_count_777516.10 |          |
| 2558670037 | DRAFT_00705 | Coordinates    | 15251..15658(+)                                   |          |
| 2558670037 | DRAFT_00705 | DNA_length     | 408bp                                             |          |
| 2558670037 | DRAFT_00705 | Protein_length | 135aa                                             |          |
| 2558670037 | DRAFT_00705 | GC             |                                                   | 0.57     |
| 2558670038 | DRAFT_00706 | pfam05014      | Nuc_deoxyrib_tr                                   | 1.90E-10 |
| 2558670038 | DRAFT_00706 | Locus_type     | CDS                                               |          |
| 2558670038 | DRAFT_00706 | Product_name   | Nucleoside 2-deoxyribosyltransferase              |          |
| 2558670038 | DRAFT_00706 | Scaffold       | DRAFT_contig_70_60_len_46101_read_count_777516.10 |          |
| 2558670038 | DRAFT_00706 | Coordinates    | 16216..16608(+)                                   |          |
| 2558670038 | DRAFT_00706 | DNA_length     | 393bp                                             |          |

|            |             |                |                                                                        |          |
|------------|-------------|----------------|------------------------------------------------------------------------|----------|
| 2558670038 | DRAFT_00706 | Protein_length | 130aa                                                                  |          |
| 2558670038 | DRAFT_00706 | GC             |                                                                        | 0.54     |
| 2558670039 | DRAFT_00707 | KEGG_module    | M00016: Lysine biosynthesis, succinyl-DAP pathway, aspartate => lysine |          |
| 2558670039 | DRAFT_00707 | Metacyc        | DAPLYSINESYN-PWY: lysine biosynthesis I                                |          |
| 2558670039 | DRAFT_00707 | COG_category   | [E] Amino acid transport and metabolism                                |          |
| 2558670039 | DRAFT_00707 | COG0624        | Acetylornithine deacetylase/Succinyl-diaminopimelate desuccinylase a   | 1.00E-55 |
| 2558670039 | DRAFT_00707 | pfam07687      | M20_dimer                                                              | 1.90E-18 |
| 2558670039 | DRAFT_00707 | pfam01546      | Peptidase_M20                                                          | 1.50E-23 |
| 2558670039 | DRAFT_00707 | EC:3.5.1.18    | Succinyl-diaminopimelate desuccinylase.                                |          |
| 2558670039 | DRAFT_00707 | TIGR01910      | acetylornithine deacetylase or succinyl-diaminopimelate desuccinylase  | 1.80E-83 |
| 2558670039 | DRAFT_00707 | KO:K01439      | succinyl-diaminopimelate desuccinylase [EC:3.5.1.18]                   | 0.00E+00 |
| 2558670039 | DRAFT_00707 | Locus_type     | CDS                                                                    |          |
| 2558670039 | DRAFT_00707 | Product_name   | acetylornithine deacetylase or succinyl-diaminopimelate desuccinylas   |          |
| 2558670039 | DRAFT_00707 | Scaffold       | DRAFT_contig_70_60_len_46101_read_count_777516.10                      |          |
| 2558670039 | DRAFT_00707 | Coordinates    | 16863..18095(-)                                                        |          |
| 2558670039 | DRAFT_00707 | DNA_length     | 1233bp                                                                 |          |
| 2558670039 | DRAFT_00707 | Protein_length | 410aa                                                                  |          |
| 2558670039 | DRAFT_00707 | GC             |                                                                        | 0.57     |
| 2558670040 | DRAFT_00708 | COG_category   | [J] Translation, ribosomal structure and biogenesis                    |          |
| 2558670040 | DRAFT_00708 | COG0251        | Putative translation initiation inhibitor, yjgF family                 | 3.00E-27 |
| 2558670040 | DRAFT_00708 | pfam01042      | Ribonuc_L-PSP                                                          | 1.30E-36 |
| 2558670040 | DRAFT_00708 | TIGR00004      | reactive intermediate/imine deaminase                                  | 1.80E-46 |
| 2558670040 | DRAFT_00708 | KO:K07567      | TdcF protein                                                           | 1.60E-31 |
| 2558670040 | DRAFT_00708 | Locus_type     | CDS                                                                    |          |
| 2558670040 | DRAFT_00708 | Product_name   | endoribonuclease L-PSP                                                 |          |
| 2558670040 | DRAFT_00708 | Scaffold       | DRAFT_contig_70_60_len_46101_read_count_777516.10                      |          |
| 2558670040 | DRAFT_00708 | Coordinates    | 18304..18675(+)                                                        |          |
| 2558670040 | DRAFT_00708 | DNA_length     | 372bp                                                                  |          |
| 2558670040 | DRAFT_00708 | Protein_length | 123aa                                                                  |          |
| 2558670040 | DRAFT_00708 | GC             |                                                                        | 0.6      |
| 2558670041 | DRAFT_00709 | COG_category   | [T] Signal transduction mechanisms                                     |          |

|            |             |                |                                                                  |          |
|------------|-------------|----------------|------------------------------------------------------------------|----------|
| 2558670041 | DRAFT_00709 | COG2114        | Adenylate cyclase, family 3 (some proteins contain HAMP domain)  | 5.00E-24 |
| 2558670041 | DRAFT_00709 | pfam14947      | HTH_45                                                           | 5.20E-09 |
| 2558670041 | DRAFT_00709 | pfam00211      | Guanylate_cyc                                                    | 4.60E-20 |
| 2558670041 | DRAFT_00709 | Locus_type     | CDS                                                              |          |
| 2558670041 | DRAFT_00709 | Product_name   | Adenylate cyclase, family 3 (some proteins contain HAMP domain)  |          |
| 2558670041 | DRAFT_00709 | Scaffold       | DRAFT_contig_70_60_len_46101_read_count_777516.10                |          |
| 2558670041 | DRAFT_00709 | Coordinates    | 18925..19749(-)                                                  |          |
| 2558670041 | DRAFT_00709 | DNA_length     | 825bp                                                            |          |
| 2558670041 | DRAFT_00709 | Protein_length | 274aa                                                            |          |
| 2558670041 | DRAFT_00709 | GC             |                                                                  | 0.56     |
|            |             |                |                                                                  |          |
| 2558670042 | DRAFT_00710 | Locus_type     | CDS                                                              |          |
| 2558670042 | DRAFT_00710 | Product_name   | hypothetical protein                                             |          |
| 2558670042 | DRAFT_00710 | Scaffold       | DRAFT_contig_70_60_len_46101_read_count_777516.10                |          |
| 2558670042 | DRAFT_00710 | Coordinates    | 19781..20950(-)                                                  |          |
| 2558670042 | DRAFT_00710 | DNA_length     | 1170bp                                                           |          |
| 2558670042 | DRAFT_00710 | Protein_length | 389aa                                                            |          |
| 2558670042 | DRAFT_00710 | GC             |                                                                  | 0.61     |
|            |             |                |                                                                  |          |
| 2558670043 | DRAFT_00711 | COG_category   | [J] Translation, ribosomal structure and biogenesis              |          |
| 2558670043 | DRAFT_00711 | COG1670        | Acetyltransferases, including N-acetylases of ribosomal proteins | 8.00E-20 |
| 2558670043 | DRAFT_00711 | pfam13302      | Acetyltransf_3                                                   | 4.40E-23 |
| 2558670043 | DRAFT_00711 | Locus_type     | CDS                                                              |          |
| 2558670043 | DRAFT_00711 | Product_name   | Acetyltransferases, including N-acetylases of ribosomal proteins |          |
| 2558670043 | DRAFT_00711 | Scaffold       | DRAFT_contig_70_60_len_46101_read_count_777516.10                |          |
| 2558670043 | DRAFT_00711 | Coordinates    | 21121..21699(-)                                                  |          |
| 2558670043 | DRAFT_00711 | DNA_length     | 579bp                                                            |          |
| 2558670043 | DRAFT_00711 | Protein_length | 192aa                                                            |          |
| 2558670043 | DRAFT_00711 | GC             |                                                                  | 0.51     |
|            |             |                |                                                                  |          |
| 2558670044 | DRAFT_00712 | Locus_type     | CDS                                                              |          |
| 2558670044 | DRAFT_00712 | Product_name   | hypothetical protein                                             |          |
| 2558670044 | DRAFT_00712 | Scaffold       | DRAFT_contig_70_60_len_46101_read_count_777516.10                |          |
| 2558670044 | DRAFT_00712 | Coordinates    | 21784..21987(-)                                                  |          |

|            |             |                |                                                                   |          |
|------------|-------------|----------------|-------------------------------------------------------------------|----------|
| 2558670044 | DRAFT_00712 | DNA_length     | 204bp                                                             |          |
| 2558670044 | DRAFT_00712 | Protein_length | 67aa                                                              |          |
| 2558670044 | DRAFT_00712 | GC             |                                                                   | 0.53     |
| 2558670045 | DRAFT_00713 | COG_category   | [D] Cell cycle control, cell division, chromosome partitioning    |          |
| 2558670045 | DRAFT_00713 | COG0489        | ATPases involved in chromosome partitioning                       | 7.00E-57 |
| 2558670045 | DRAFT_00713 | pfam01883      | DUF59                                                             | 4.80E-23 |
| 2558670045 | DRAFT_00713 | pfam13614      | AAA_31                                                            | 2.40E-09 |
| 2558670045 | DRAFT_00713 | pfam10609      | ParA                                                              | 1.20E-34 |
| 2558670045 | DRAFT_00713 | KO:K03593      | ATP-binding protein involved in chromosome partitioning           | 0.00E+00 |
| 2558670045 | DRAFT_00713 | Locus_type     | CDS                                                               |          |
| 2558670045 | DRAFT_00713 | Product_name   | ATPases involved in chromosome partitioning                       |          |
| 2558670045 | DRAFT_00713 | Scaffold       | DRAFT_contig_70_60_len_46101_read_count_777516.10                 |          |
| 2558670045 | DRAFT_00713 | Coordinates    | 21984..23039(-)                                                   |          |
| 2558670045 | DRAFT_00713 | DNA_length     | 1056bp                                                            |          |
| 2558670045 | DRAFT_00713 | Protein_length | 351aa                                                             |          |
| 2558670045 | DRAFT_00713 | GC             |                                                                   | 0.61     |
| 2558670046 | DRAFT_00714 | KEGG_module    | M00378: F420 biosynthesis                                         |          |
| 2558670046 | DRAFT_00714 | Metacyc        | PWY-5199: factor 420 polyglutamylation                            |          |
| 2558670046 | DRAFT_00714 | COG_category   | [S] Function unknown                                              |          |
| 2558670046 | DRAFT_00714 | COG1478        | Uncharacterized conserved protein                                 | 2.00E-63 |
| 2558670046 | DRAFT_00714 | pfam01996      | F420_ligase                                                       | 1.40E-69 |
| 2558670046 | DRAFT_00714 | EC:6.3.2.34    | Coenzyme F420-1:gamma-L-glutamate ligase.                         |          |
| 2558670046 | DRAFT_00714 | EC:6.3.2.31    | Coenzyme F420-0:L-glutamate ligase.                               |          |
| 2558670046 | DRAFT_00714 | TIGR01916      | F420-0:gamma-glutamyl ligase                                      | 2.10E-86 |
| 2558670046 | DRAFT_00714 | KO:K12234      | coenzyme F420-0:L-glutamate ligase / coenzyme F420-1:gamma-L-glut | 0.00E+00 |
| 2558670046 | DRAFT_00714 | Locus_type     | CDS                                                               |          |
| 2558670046 | DRAFT_00714 | Product_name   | coenzyme F420-0 gamma-glutamyl ligase (EC 6.3.2.31)               |          |
| 2558670046 | DRAFT_00714 | Scaffold       | DRAFT_contig_70_60_len_46101_read_count_777516.10                 |          |
| 2558670046 | DRAFT_00714 | Coordinates    | 23142..23891(+)                                                   |          |
| 2558670046 | DRAFT_00714 | DNA_length     | 750bp                                                             |          |
| 2558670046 | DRAFT_00714 | Protein_length | 249aa                                                             |          |
| 2558670046 | DRAFT_00714 | GC             |                                                                   | 0.6      |

|            |             |                |                                                       |           |
|------------|-------------|----------------|-------------------------------------------------------|-----------|
| 2558670047 | DRAFT_00715 | KEGG_module    | M00378: F420 biosynthesis                             |           |
| 2558670047 | DRAFT_00715 | Metacyc        | PWY-5198: factor 420 biosynthesis                     |           |
| 2558670047 | DRAFT_00715 | IMG_pathway    | 357: Coenzyme F420 synthesis                          |           |
| 2558670047 | DRAFT_00715 | COG_category   | [S] Function unknown                                  |           |
| 2558670047 | DRAFT_00715 | COG0391        | Uncharacterized conserved protein                     | 2.00E-53  |
| 2558670047 | DRAFT_00715 | pfam01933      | UPF0052                                               | 6.80E-48  |
| 2558670047 | DRAFT_00715 | EC:2.7.8.28    | 2-phospho-L-lactate transferase.                      |           |
| 2558670047 | DRAFT_00715 | TIGR01819      | LPPG:FO 2-phospho-L-lactate transferase               | 8.50E-102 |
| 2558670047 | DRAFT_00715 | KO:K11212      | LPPG:FO 2-phospho-L-lactate transferase [EC:2.7.8.28] | 0.00E+00  |
| 2558670047 | DRAFT_00715 | ITERM:01551    | LPPG:FO 2-phospho-L-lactate transferase (EC 2.7.8.28) |           |
| 2558670047 | DRAFT_00715 | Locus_type     | CDS                                                   |           |
| 2558670047 | DRAFT_00715 | Product_name   | LPPG:FO 2-phospho-L-lactate transferase (EC 2.7.8.28) |           |
| 2558670047 | DRAFT_00715 | Scaffold       | DRAFT_contig_70_60_len_46101_read_count_777516.10     |           |
| 2558670047 | DRAFT_00715 | Coordinates    | 23896..24810(+)                                       |           |
| 2558670047 | DRAFT_00715 | DNA_length     | 915bp                                                 |           |
| 2558670047 | DRAFT_00715 | Protein_length | 304aa                                                 |           |
| 2558670047 | DRAFT_00715 | GC             |                                                       | 0.62      |
|            |             |                |                                                       |           |
| 2558670048 | DRAFT_00716 | KEGG_module    | M00378: F420 biosynthesis                             |           |
| 2558670048 | DRAFT_00716 | Metacyc        | PWY-5198: factor 420 biosynthesis                     |           |
| 2558670048 | DRAFT_00716 | COG_category   | [S] Function unknown                                  |           |
| 2558670048 | DRAFT_00716 | COG1920        | Uncharacterized conserved protein                     | 3.00E-18  |
| 2558670048 | DRAFT_00716 | pfam01983      | CofC                                                  | 1.70E-22  |
| 2558670048 | DRAFT_00716 | EC:2.7.7.68    | 2-phospho-L-lactate guanylyltransferase.              |           |
| 2558670048 | DRAFT_00716 | TIGR03552      | 2-phospho-L-lactate guanylyltransferase               | 1.50E-38  |
| 2558670048 | DRAFT_00716 | KO:K14941      | 2-phospho-L-lactate guanylyltransferase [EC:2.7.7.68] | 3.40E-20  |
| 2558670048 | DRAFT_00716 | Locus_type     | CDS                                                   |           |
| 2558670048 | DRAFT_00716 | Product_name   | 2-phospho-L-lactate guanylyltransferase               |           |
| 2558670048 | DRAFT_00716 | Scaffold       | DRAFT_contig_70_60_len_46101_read_count_777516.10     |           |
| 2558670048 | DRAFT_00716 | Coordinates    | 24873..25448(+)                                       |           |
| 2558670048 | DRAFT_00716 | DNA_length     | 576bp                                                 |           |
| 2558670048 | DRAFT_00716 | Protein_length | 191aa                                                 |           |
| 2558670048 | DRAFT_00716 | GC             |                                                       | 0.6       |



|            |             |                |                                                                     |          |
|------------|-------------|----------------|---------------------------------------------------------------------|----------|
| 2558670049 | DRAFT_00717 | COG_category   | [R] General function prediction only                                |          |
| 2558670049 | DRAFT_00717 | COG1574        | Predicted metal-dependent hydrolase with the TIM-barrel fold        | 2.00E-87 |
| 2558670049 | DRAFT_00717 | pfam07969      | Amidohydro_3                                                        | 1.60E-61 |
| 2558670049 | DRAFT_00717 | Locus_type     | CDS                                                                 |          |
| 2558670049 | DRAFT_00717 | Product_name   | Predicted metal-dependent hydrolase with the TIM-barrel fold        |          |
| 2558670049 | DRAFT_00717 | Scaffold       | DRAFT_contig_70_60_len_46101_read_count_777516.10                   |          |
| 2558670049 | DRAFT_00717 | Coordinates    | 25490..26974(+)                                                     |          |
| 2558670049 | DRAFT_00717 | DNA_length     | 1485bp                                                              |          |
| 2558670049 | DRAFT_00717 | Protein_length | 494aa                                                               |          |
| 2558670049 | DRAFT_00717 | GC             |                                                                     | 0.62     |
| 2558670050 | DRAFT_00718 | COG_category   | [S] Function unknown                                                |          |
| 2558670050 | DRAFT_00718 | COG4754        | Uncharacterized conserved protein                                   | 1.00E-15 |
| 2558670050 | DRAFT_00718 | pfam09821      | AAA_assoc_C                                                         | 3.70E-17 |
| 2558670050 | DRAFT_00718 | Locus_type     | CDS                                                                 |          |
| 2558670050 | DRAFT_00718 | Product_name   | Uncharacterized conserved protein                                   |          |
| 2558670050 | DRAFT_00718 | Scaffold       | DRAFT_contig_70_60_len_46101_read_count_777516.10                   |          |
| 2558670050 | DRAFT_00718 | Coordinates    | 26971..27498(-)                                                     |          |
| 2558670050 | DRAFT_00718 | DNA_length     | 528bp                                                               |          |
| 2558670050 | DRAFT_00718 | Protein_length | 175aa                                                               |          |
| 2558670050 | DRAFT_00718 | GC             |                                                                     | 0.58     |
| 2558670051 | DRAFT_00719 | KEGG_module    | M00188: NitT/TauT family transport system                           |          |
| 2558670051 | DRAFT_00719 | COG_category   | [P] Inorganic ion transport and metabolism                          |          |
| 2558670051 | DRAFT_00719 | COG1116        | ABC-type nitrate/sulfonate/bicarbonate transport system, ATPase com | 1.00E-77 |
| 2558670051 | DRAFT_00719 | pfam00005      | ABC_tran                                                            | 6.40E-30 |
| 2558670051 | DRAFT_00719 | KO:K02049      | NitT/TauT family transport system ATP-binding protein               | 0.00E+00 |
| 2558670051 | DRAFT_00719 | Locus_type     | CDS                                                                 |          |
| 2558670051 | DRAFT_00719 | Product_name   | ABC-type nitrate/sulfonate/bicarbonate transport system, ATPase cor |          |
| 2558670051 | DRAFT_00719 | Scaffold       | DRAFT_contig_70_60_len_46101_read_count_777516.10                   |          |
| 2558670051 | DRAFT_00719 | Coordinates    | 27533..28318(-)                                                     |          |
| 2558670051 | DRAFT_00719 | DNA_length     | 786bp                                                               |          |
| 2558670051 | DRAFT_00719 | Protein_length | 261aa                                                               |          |

|            |             |                |         |                                                   |          |
|------------|-------------|----------------|---------|---------------------------------------------------|----------|
| 2558670051 | DRAFT_00719 | GC             |         |                                                   | 0.58     |
| 2558670052 | DRAFT_00720 | pfam14321      | DUF4382 |                                                   | 1.50E-07 |
| 2558670052 | DRAFT_00720 | Locus_type     |         | CDS                                               |          |
| 2558670052 | DRAFT_00720 | Product_name   |         | Domain of unknown function (DUF4382)              |          |
| 2558670052 | DRAFT_00720 | Scaffold       |         | DRAFT_contig_70_60_len_46101_read_count_777516.10 |          |
| 2558670052 | DRAFT_00720 | Coordinates    |         | 28627..29358(+)                                   |          |
| 2558670052 | DRAFT_00720 | DNA_length     |         | 732bp                                             |          |
| 2558670052 | DRAFT_00720 | Protein_length |         | 243aa                                             |          |
| 2558670052 | DRAFT_00720 | GC             |         |                                                   | 0.57     |
| 2558670052 | DRAFT_00720 | Transmembrane  |         | Yes                                               |          |
| 2558670053 | DRAFT_00721 | pfam12840      | HTH_20  |                                                   | 1.20E-06 |
| 2558670053 | DRAFT_00721 | Locus_type     |         | CDS                                               |          |
| 2558670053 | DRAFT_00721 | Product_name   |         | Helix-turn-helix domain                           |          |
| 2558670053 | DRAFT_00721 | Scaffold       |         | DRAFT_contig_70_60_len_46101_read_count_777516.10 |          |
| 2558670053 | DRAFT_00721 | Coordinates    |         | 29360..29632(+)                                   |          |
| 2558670053 | DRAFT_00721 | DNA_length     |         | 273bp                                             |          |
| 2558670053 | DRAFT_00721 | Protein_length |         | 90aa                                              |          |
| 2558670053 | DRAFT_00721 | GC             |         |                                                   | 0.58     |
| 2558670054 | DRAFT_00722 | Locus_type     |         | CDS                                               |          |
| 2558670054 | DRAFT_00722 | Product_name   |         | hypothetical protein                              |          |
| 2558670054 | DRAFT_00722 | Scaffold       |         | DRAFT_contig_70_60_len_46101_read_count_777516.10 |          |
| 2558670054 | DRAFT_00722 | Coordinates    |         | 29935..30660(-)                                   |          |
| 2558670054 | DRAFT_00722 | DNA_length     |         | 726bp                                             |          |
| 2558670054 | DRAFT_00722 | Protein_length |         | 241aa                                             |          |
| 2558670054 | DRAFT_00722 | GC             |         |                                                   | 0.51     |
| 2558670054 | DRAFT_00722 | Signal_peptide |         | Yes                                               |          |
| 2558670054 | DRAFT_00722 | Transmembrane  |         | Yes                                               |          |
| 2558670055 | DRAFT_00723 | pfam01022      | HTH_5   |                                                   | 2.90E-05 |
| 2558670055 | DRAFT_00723 | Locus_type     |         | CDS                                               |          |
| 2558670055 | DRAFT_00723 | Product_name   |         | Bacterial regulatory protein, arsR family         |          |

|            |             |                |                                                                |          |
|------------|-------------|----------------|----------------------------------------------------------------|----------|
| 2558670055 | DRAFT_00723 | Scaffold       | DRAFT_contig_70_60_len_46101_read_count_777516.10              |          |
| 2558670055 | DRAFT_00723 | Coordinates    | 30735..31178(-)                                                |          |
| 2558670055 | DRAFT_00723 | DNA_length     | 444bp                                                          |          |
| 2558670055 | DRAFT_00723 | Protein_length | 147aa                                                          |          |
| 2558670055 | DRAFT_00723 | GC             |                                                                | 0.56     |
| 2558670055 | DRAFT_00723 | Transmembrane  | Yes                                                            |          |
| 2558670056 | DRAFT_00724 | KEGG_module    | M00188: NitT/TauT family transport system                      |          |
| 2558670056 | DRAFT_00724 | COG_category   | [P] Inorganic ion transport and metabolism                     |          |
| 2558670056 | DRAFT_00724 | COG4986        | ABC-type anion transport system, duplicated permease component | 5.00E-63 |
| 2558670056 | DRAFT_00724 | pfam00528      | BPD_transp_1                                                   | 1.10E-12 |
| 2558670056 | DRAFT_00724 | pfam00528      | BPD_transp_1                                                   | 6.70E-16 |
| 2558670056 | DRAFT_00724 | KO:K02050      | NiT/TauT family transport system permease protein              | 0.00E+00 |
| 2558670056 | DRAFT_00724 | Locus_type     | CDS                                                            |          |
| 2558670056 | DRAFT_00724 | Product_name   | ABC-type anion transport system, duplicated permease component |          |
| 2558670056 | DRAFT_00724 | Scaffold       | DRAFT_contig_70_60_len_46101_read_count_777516.10              |          |
| 2558670056 | DRAFT_00724 | Coordinates    | 31561..33111(-)                                                |          |
| 2558670056 | DRAFT_00724 | DNA_length     | 1551bp                                                         |          |
| 2558670056 | DRAFT_00724 | Protein_length | 516aa                                                          |          |
| 2558670056 | DRAFT_00724 | GC             |                                                                | 0.55     |
| 2558670056 | DRAFT_00724 | Transmembrane  | Yes                                                            |          |
| 2558670057 | DRAFT_00725 | Locus_type     | CDS                                                            |          |
| 2558670057 | DRAFT_00725 | Product_name   | hypothetical protein                                           |          |
| 2558670057 | DRAFT_00725 | Scaffold       | DRAFT_contig_70_60_len_46101_read_count_777516.10              |          |
| 2558670057 | DRAFT_00725 | Coordinates    | 33219..33650(-)                                                |          |
| 2558670057 | DRAFT_00725 | DNA_length     | 432bp                                                          |          |
| 2558670057 | DRAFT_00725 | Protein_length | 143aa                                                          |          |
| 2558670057 | DRAFT_00725 | GC             |                                                                | 0.56     |
| 2558670058 | DRAFT_00726 | Locus_type     | CDS                                                            |          |
| 2558670058 | DRAFT_00726 | Product_name   | hypothetical protein                                           |          |
| 2558670058 | DRAFT_00726 | Scaffold       | DRAFT_contig_70_60_len_46101_read_count_777516.10              |          |
| 2558670058 | DRAFT_00726 | Coordinates    | 33781..34137(-)                                                |          |

|            |             |                |                                                                  |          |
|------------|-------------|----------------|------------------------------------------------------------------|----------|
| 2558670058 | DRAFT_00726 | DNA_length     | 357bp                                                            |          |
| 2558670058 | DRAFT_00726 | Protein_length | 118aa                                                            |          |
| 2558670058 | DRAFT_00726 | GC             |                                                                  | 0.59     |
| 2558670059 | DRAFT_00727 | pfam04014      | Antitoxin-MazE                                                   | 3.30E-08 |
| 2558670059 | DRAFT_00727 | Locus_type     | CDS                                                              |          |
| 2558670059 | DRAFT_00727 | Product_name   | Antidote-toxin recognition MazE                                  |          |
| 2558670059 | DRAFT_00727 | Scaffold       | DRAFT_contig_70_60_len_46101_read_count_777516.10                |          |
| 2558670059 | DRAFT_00727 | Coordinates    | 34344..34544(+)                                                  |          |
| 2558670059 | DRAFT_00727 | DNA_length     | 201bp                                                            |          |
| 2558670059 | DRAFT_00727 | Protein_length | 66aa                                                             |          |
| 2558670059 | DRAFT_00727 | GC             |                                                                  | 0.56     |
| 2558670060 | DRAFT_00728 | COG_category   | [E] Amino acid transport and metabolism                          |          |
| 2558670060 | DRAFT_00728 | COG0346        | Lactoylglutathione lyase and related lyases                      | 5.00E-04 |
| 2558670060 | DRAFT_00728 | pfam12681      | Glyoxalase_2                                                     | 2.80E-14 |
| 2558670060 | DRAFT_00728 | Locus_type     | CDS                                                              |          |
| 2558670060 | DRAFT_00728 | Product_name   | Lactoylglutathione lyase and related lyases                      |          |
| 2558670060 | DRAFT_00728 | Scaffold       | DRAFT_contig_70_60_len_46101_read_count_777516.10                |          |
| 2558670060 | DRAFT_00728 | Coordinates    | 34619..34960(+)                                                  |          |
| 2558670060 | DRAFT_00728 | DNA_length     | 342bp                                                            |          |
| 2558670060 | DRAFT_00728 | Protein_length | 113aa                                                            |          |
| 2558670060 | DRAFT_00728 | GC             |                                                                  | 0.56     |
| 2558670061 | DRAFT_00729 | Metacyc        | PWY-5770: phenazine-1-carboxylate biosynthesis                   |          |
| 2558670061 | DRAFT_00729 | Metacyc        | PWY-5365: linear furanocoumarin biosynthesis                     |          |
| 2558670061 | DRAFT_00729 | Metacyc        | PWY-5808: hyperforin and adhyperforin biosynthesis               |          |
| 2558670061 | DRAFT_00729 | Metacyc        | PWY-5816: all <i>trans</i> undecaprenyl diphosphate biosynthesis |          |
| 2558670061 | DRAFT_00729 | Metacyc        | PWY-4681: kievitone biosynthesis                                 |          |
| 2558670061 | DRAFT_00729 | Metacyc        | PWY-5132: humulone biosynthesis                                  |          |
| 2558670061 | DRAFT_00729 | Metacyc        | PWY-6834: spermidine biosynthesis III                            |          |
| 2558670061 | DRAFT_00729 | Metacyc        | PWY-2681: <i>trans</i> -zeatin biosynthesis                      |          |
| 2558670061 | DRAFT_00729 | Metacyc        | PWY-5802: alizarin biosynthesis                                  |          |
| 2558670061 | DRAFT_00729 | Metacyc        | PWY-6681: neurosporaxanthin biosynthesis                         |          |

|            |             |                |                                                                                                  |          |
|------------|-------------|----------------|--------------------------------------------------------------------------------------------------|----------|
| 2558670061 | DRAFT_00729 | Metacyc        | PWY-5893: tridecaprenyl diphosphate biosynthesis                                                 |          |
| 2558670061 | DRAFT_00729 | Metacyc        | PWY-6262: demethylmenaquinol-8 biosynthesis II                                                   |          |
| 2558670061 | DRAFT_00729 | Metacyc        | PWY-5817: dodecaprenyl diphosphate biosynthesis                                                  |          |
| 2558670061 | DRAFT_00729 | Metacyc        | PWY-5027: phyloquinol biosynthesis                                                               |          |
| 2558670061 | DRAFT_00729 | Metacyc        | PWY-702: methionine biosynthesis II                                                              |          |
| 2558670061 | DRAFT_00729 | Metacyc        | PWY-5135: xanthohumol biosynthesis                                                               |          |
| 2558670061 | DRAFT_00729 | Metacyc        | PWY-5133: cohumulone biosynthesis                                                                |          |
| 2558670061 | DRAFT_00729 | Metacyc        | PWY-6936: seleno-amino acid biosynthesis                                                         |          |
| 2558670061 | DRAFT_00729 | Metacyc        | PWY-5064: chlorophyll <i>a</i> biosynthesis II                                                   |          |
| 2558670061 | DRAFT_00729 | Metacyc        | PWY-4502: wighteone and luteone biosynthesis                                                     |          |
| 2558670061 | DRAFT_00729 | Metacyc        | PWY-7169: hyperxanthone E biosynthesis                                                           |          |
| 2558670061 | DRAFT_00729 | Metacyc        | PWY-5068: chlorophyll cycle                                                                      |          |
| 2558670061 | DRAFT_00729 | Metacyc        | PWY-6793: demethylmenaquinol-8 biosynthesis III                                                  |          |
| 2558670061 | DRAFT_00729 | Metacyc        | PWY-6403: carrageenan biosynthesis                                                               |          |
| 2558670061 | DRAFT_00729 | COG_category   | [O] Posttranslational modification, protein turnover, chaperones                                 |          |
| 2558670061 | DRAFT_00729 | COG0109        | Polyprenyltransferase (cytochrome oxidase assembly factor)                                       | 2.00E-60 |
| 2558670061 | DRAFT_00729 | pfam01040      | UbiA                                                                                             | 2.00E-28 |
| 2558670061 | DRAFT_00729 | EC:2.5.1.-     | Transferases. Transferring alkyl or aryl groups, other than methyl groups. Transferring alkyl or |          |
| 2558670061 | DRAFT_00729 | TIGR01473      | protoheme IX farnesyltransferase                                                                 | 2.30E-82 |
| 2558670061 | DRAFT_00729 | KO:K02301      | protoheme IX farnesyltransferase [EC:2.5.1.-]                                                    | 0.00E+00 |
| 2558670061 | DRAFT_00729 | Locus_type     | CDS                                                                                              |          |
| 2558670061 | DRAFT_00729 | Product_name   | protoheme IX farnesyltransferase                                                                 |          |
| 2558670061 | DRAFT_00729 | Scaffold       | DRAFT_contig_70_60_len_46101_read_count_777516.10                                                |          |
| 2558670061 | DRAFT_00729 | Coordinates    | 35197..36075(+)                                                                                  |          |
| 2558670061 | DRAFT_00729 | DNA_length     | 879bp                                                                                            |          |
| 2558670061 | DRAFT_00729 | Protein_length | 292aa                                                                                            |          |
| 2558670061 | DRAFT_00729 | GC             |                                                                                                  | 0.58     |
| 2558670061 | DRAFT_00729 | Transmembrane  | Yes                                                                                              |          |
| 2558670062 | DRAFT_00730 | COG_category   | [O] Posttranslational modification, protein turnover, chaperones                                 |          |
| 2558670062 | DRAFT_00730 | COG4346        | Predicted membrane-bound dolichyl-phosphate-mannose-protein man                                  | 6.00E-15 |
| 2558670062 | DRAFT_00730 | pfam02366      | PMT                                                                                              | 4.90E-14 |
| 2558670062 | DRAFT_00730 | Locus_type     | CDS                                                                                              |          |
| 2558670062 | DRAFT_00730 | Product_name   | Predicted membrane-bound dolichyl-phosphate-mannose-protein ma                                   |          |

|            |             |                |                                     |                                                   |          |
|------------|-------------|----------------|-------------------------------------|---------------------------------------------------|----------|
| 2558670062 | DRAFT_00730 | Scaffold       |                                     | DRAFT_contig_70_60_len_46101_read_count_777516.10 |          |
| 2558670062 | DRAFT_00730 | Coordinates    |                                     | 36118..37719(-)                                   |          |
| 2558670062 | DRAFT_00730 | DNA_length     |                                     | 1602bp                                            |          |
| 2558670062 | DRAFT_00730 | Protein_length |                                     | 533aa                                             |          |
| 2558670062 | DRAFT_00730 | GC             |                                     |                                                   | 0.58     |
| 2558670062 | DRAFT_00730 | Transmembrane  |                                     | Yes                                               |          |
|            |             |                |                                     |                                                   |          |
| 2558670063 | DRAFT_00731 | Locus_type     |                                     | CDS                                               |          |
| 2558670063 | DRAFT_00731 | Product_name   |                                     | hypothetical protein                              |          |
| 2558670063 | DRAFT_00731 | Scaffold       |                                     | DRAFT_contig_70_60_len_46101_read_count_777516.10 |          |
| 2558670063 | DRAFT_00731 | Coordinates    |                                     | 37999..38316(+)                                   |          |
| 2558670063 | DRAFT_00731 | DNA_length     |                                     | 318bp                                             |          |
| 2558670063 | DRAFT_00731 | Protein_length |                                     | 105aa                                             |          |
| 2558670063 | DRAFT_00731 | GC             |                                     |                                                   | 0.51     |
| 2558670063 | DRAFT_00731 | Transmembrane  |                                     | Yes                                               |          |
|            |             |                |                                     |                                                   |          |
| 2558670064 | DRAFT_00732 | Locus_type     |                                     | CDS                                               |          |
| 2558670064 | DRAFT_00732 | Product_name   |                                     | hypothetical protein                              |          |
| 2558670064 | DRAFT_00732 | Scaffold       |                                     | DRAFT_contig_70_60_len_46101_read_count_777516.10 |          |
| 2558670064 | DRAFT_00732 | Coordinates    |                                     | 38532..38864(-)                                   |          |
| 2558670064 | DRAFT_00732 | DNA_length     |                                     | 333bp                                             |          |
| 2558670064 | DRAFT_00732 | Protein_length |                                     | 110aa                                             |          |
| 2558670064 | DRAFT_00732 | GC             |                                     |                                                   | 0.55     |
|            |             |                |                                     |                                                   |          |
| 2558670065 | DRAFT_00733 | COG_category   | [K] Transcription                   |                                                   |          |
| 2558670065 | DRAFT_00733 | COG3432        | Predicted transcriptional regulator |                                                   | 2.00E-11 |
| 2558670065 | DRAFT_00733 | pfam14947      | HTH_45                              |                                                   | 7.40E-17 |
| 2558670065 | DRAFT_00733 | Locus_type     |                                     | CDS                                               |          |
| 2558670065 | DRAFT_00733 | Product_name   |                                     | Predicted transcriptional regulator               |          |
| 2558670065 | DRAFT_00733 | Scaffold       |                                     | DRAFT_contig_70_60_len_46101_read_count_777516.10 |          |
| 2558670065 | DRAFT_00733 | Coordinates    |                                     | 39084..39422(+)                                   |          |
| 2558670065 | DRAFT_00733 | DNA_length     |                                     | 339bp                                             |          |
| 2558670065 | DRAFT_00733 | Protein_length |                                     | 112aa                                             |          |
| 2558670065 | DRAFT_00733 | GC             |                                     |                                                   | 0.53     |

|            |             |                |                                                                                    |          |
|------------|-------------|----------------|------------------------------------------------------------------------------------|----------|
| 2558670066 | DRAFT_00734 | Locus_type     | CDS                                                                                |          |
| 2558670066 | DRAFT_00734 | Product_name   | hypothetical protein                                                               |          |
| 2558670066 | DRAFT_00734 | Scaffold       | DRAFT_contig_70_60_len_46101_read_count_777516.10                                  |          |
| 2558670066 | DRAFT_00734 | Coordinates    | 39490..40917(-)                                                                    |          |
| 2558670066 | DRAFT_00734 | DNA_length     | 1428bp                                                                             |          |
| 2558670066 | DRAFT_00734 | Protein_length | 475aa                                                                              |          |
| 2558670066 | DRAFT_00734 | GC             |                                                                                    | 0.57     |
| 2558670066 | DRAFT_00734 | Transmembrane  | Yes                                                                                |          |
| 2558670067 | DRAFT_00735 | KEGG_module    | M00365: C10-C20 isoprenoid biosynthesis, archaea                                   |          |
| 2558670067 | DRAFT_00735 | KEGG_module    | M00364: C10-C20 isoprenoid biosynthesis, bacteria                                  |          |
| 2558670067 | DRAFT_00735 | Metacyc        | PWY-6659: fusicoccins biosynthesis                                                 |          |
| 2558670067 | DRAFT_00735 | Metacyc        | PWY2OL-4: superpathway of linalool biosynthesis                                    |          |
| 2558670067 | DRAFT_00735 | Metacyc        | PWY-6383: mono-<i>trans</i>, poly-<i>cis</i> decaprenyl phosphate biosynthesis     |          |
| 2558670067 | DRAFT_00735 | Metacyc        | PWY-6859: <i>all-trans</i>-farnesol biosynthesis                                   |          |
| 2558670067 | DRAFT_00735 | Metacyc        | PWY-6691: plaunotol biosynthesis                                                   |          |
| 2558670067 | DRAFT_00735 | Metacyc        | PWY-5123: <i>trans, trans</i>-farnesyl diphosphate biosynthesis                    |          |
| 2558670067 | DRAFT_00735 | Metacyc        | PWY-5122: geranyl diphosphate biosynthesis                                         |          |
| 2558670067 | DRAFT_00735 | Metacyc        | PWY-7182: linalool biosynthesis I                                                  |          |
| 2558670067 | DRAFT_00735 | Metacyc        | PWY-7141: linalool biosynthesis II                                                 |          |
| 2558670067 | DRAFT_00735 | Metacyc        | PWY-5120: geranylgeranyldiphosphate biosynthesis                                   |          |
| 2558670067 | DRAFT_00735 | Metacyc        | PWY-7102: bisabolene biosynthesis                                                  |          |
| 2558670067 | DRAFT_00735 | COG_category   | [H] Coenzyme transport and metabolism                                              |          |
| 2558670067 | DRAFT_00735 | COG0142        | Geranylgeranyl pyrophosphate synthase                                              | 2.00E-55 |
| 2558670067 | DRAFT_00735 | pfam00348      | polyprenyl_synt                                                                    | 8.40E-52 |
| 2558670067 | DRAFT_00735 | EC:2.5.1.29    | Geranylgeranyl diphosphate synthase.                                               |          |
| 2558670067 | DRAFT_00735 | EC:2.5.1.1     | Dimethylallyltranstransferase.                                                     |          |
| 2558670067 | DRAFT_00735 | EC:2.5.1.10    | (2E,6E)-farnesyl diphosphate synthase.                                             |          |
| 2558670067 | DRAFT_00735 | KO:K13787      | geranylgeranyl diphosphate synthase, type I [EC:2.5.1.1 2.5.1.10 2.5.1.10 0.00E+00 |          |
| 2558670067 | DRAFT_00735 | ITERM:00778    | farnesyl-diphosphate synthase (EC 2.5.1.10)                                        |          |
| 2558670067 | DRAFT_00735 | ITERM:05618    | geranylgeranyl-diphosphate synthase (EC 2.5.1.29)                                  |          |
| 2558670067 | DRAFT_00735 | Locus_type     | CDS                                                                                |          |
| 2558670067 | DRAFT_00735 | Product_name   | farnesyl-diphosphate synthase (EC 2.5.1.10)/geranylgeranyl-diphosph                |          |

|            |             |                |                                                                      |                                                                      |          |
|------------|-------------|----------------|----------------------------------------------------------------------|----------------------------------------------------------------------|----------|
| 2558670067 | DRAFT_00735 | Scaffold       |                                                                      | DRAFT_contig_70_60_len_46101_read_count_777516.10                    |          |
| 2558670067 | DRAFT_00735 | Coordinates    |                                                                      | 40967..41992(-)                                                      |          |
| 2558670067 | DRAFT_00735 | DNA_length     |                                                                      | 1026bp                                                               |          |
| 2558670067 | DRAFT_00735 | Protein_length |                                                                      | 341aa                                                                |          |
| 2558670067 | DRAFT_00735 | GC             |                                                                      |                                                                      | 0.59     |
|            |             |                |                                                                      |                                                                      |          |
| 2558670068 | DRAFT_00736 | COG_category   | [H] Coenzyme transport and metabolism                                |                                                                      |          |
| 2558670068 | DRAFT_00736 | COG0382        | 4-hydroxybenzoate polyprenyltransferase and related prenyltransferas |                                                                      | 2.00E-09 |
| 2558670068 | DRAFT_00736 | pfam01040      | UbiA                                                                 |                                                                      | 3.40E-24 |
| 2558670068 | DRAFT_00736 | Locus_type     |                                                                      | CDS                                                                  |          |
| 2558670068 | DRAFT_00736 | Product_name   |                                                                      | 4-hydroxybenzoate polyprenyltransferase and related prenyltransferas |          |
| 2558670068 | DRAFT_00736 | Scaffold       |                                                                      | DRAFT_contig_70_60_len_46101_read_count_777516.10                    |          |
| 2558670068 | DRAFT_00736 | Coordinates    |                                                                      | 41979..42896(-)                                                      |          |
| 2558670068 | DRAFT_00736 | DNA_length     |                                                                      | 918bp                                                                |          |
| 2558670068 | DRAFT_00736 | Protein_length |                                                                      | 305aa                                                                |          |
| 2558670068 | DRAFT_00736 | GC             |                                                                      |                                                                      | 0.59     |
| 2558670068 | DRAFT_00736 | Transmembrane  |                                                                      | Yes                                                                  |          |
|            |             |                |                                                                      |                                                                      |          |
| 2558670069 | DRAFT_00737 | Locus_type     |                                                                      | CDS                                                                  |          |
| 2558670069 | DRAFT_00737 | Product_name   |                                                                      | hypothetical protein                                                 |          |
| 2558670069 | DRAFT_00737 | Scaffold       |                                                                      | DRAFT_contig_70_60_len_46101_read_count_777516.10                    |          |
| 2558670069 | DRAFT_00737 | Coordinates    |                                                                      | 42836..43927(-)                                                      |          |
| 2558670069 | DRAFT_00737 | DNA_length     |                                                                      | 1092bp                                                               |          |
| 2558670069 | DRAFT_00737 | Protein_length |                                                                      | 363aa                                                                |          |
| 2558670069 | DRAFT_00737 | GC             |                                                                      |                                                                      | 0.54     |
|            |             |                |                                                                      |                                                                      |          |
| 2558670070 | DRAFT_00738 | COG_category   | [T] Signal transduction mechanisms                                   |                                                                      |          |
| 2558670070 | DRAFT_00738 | COG0467        | RecA-superfamily ATPases implicated in signal transduction           |                                                                      | 2.00E-30 |
| 2558670070 | DRAFT_00738 | pfam06745      | KaiC                                                                 |                                                                      | 3.30E-48 |
| 2558670070 | DRAFT_00738 | Locus_type     |                                                                      | CDS                                                                  |          |
| 2558670070 | DRAFT_00738 | Product_name   |                                                                      | RecA-superfamily ATPases implicated in signal transduction           |          |
| 2558670070 | DRAFT_00738 | Scaffold       |                                                                      | DRAFT_contig_70_60_len_46101_read_count_777516.10                    |          |
| 2558670070 | DRAFT_00738 | Coordinates    |                                                                      | 44104..44796(+)                                                      |          |
| 2558670070 | DRAFT_00738 | DNA_length     |                                                                      | 693bp                                                                |          |



|            |             |                |                                                                         |          |
|------------|-------------|----------------|-------------------------------------------------------------------------|----------|
| 2558670070 | DRAFT_00738 | Protein_length | 230aa                                                                   |          |
| 2558670070 | DRAFT_00738 | GC             |                                                                         | 0.53     |
| 2558670071 | DRAFT_00739 | Locus_type     | CDS                                                                     |          |
| 2558670071 | DRAFT_00739 | Product_name   | hypothetical protein                                                    |          |
| 2558670071 | DRAFT_00739 | Scaffold       | DRAFT_contig_70_60_len_46101_read_count_777516.10                       |          |
| 2558670071 | DRAFT_00739 | Coordinates    | 44876..45922(+)                                                         |          |
| 2558670071 | DRAFT_00739 | DNA_length     | 1047bp                                                                  |          |
| 2558670071 | DRAFT_00739 | Protein_length | 348aa                                                                   |          |
| 2558670071 | DRAFT_00739 | GC             |                                                                         | 0.59     |
| 2558670071 | DRAFT_00739 | Signal_peptide | Yes                                                                     |          |
| 2558670071 | DRAFT_00739 | Transmembrane  | Yes                                                                     |          |
| 2558670072 | DRAFT_00740 | COG_category   | [R] General function prediction only                                    |          |
| 2558670072 | DRAFT_00740 | COG1011        | Predicted hydrolase (HAD superfamily)                                   | 3.00E-22 |
| 2558670072 | DRAFT_00740 | pfam13419      | HAD_2                                                                   | 1.10E-22 |
| 2558670072 | DRAFT_00740 | TIGR01549      | haloacid dehalogenase superfamily, subfamily IA, variant 1 with third n | 5.60E-11 |
| 2558670072 | DRAFT_00740 | TIGR01509      | haloacid dehalogenase superfamily, subfamily IA, variant 3 with third n | 9.10E-14 |
| 2558670072 | DRAFT_00740 | KO:K07025      | putative hydrolase of the HAD superfamily                               | 5.40E-20 |
| 2558670072 | DRAFT_00740 | Locus_type     | CDS                                                                     |          |
| 2558670072 | DRAFT_00740 | Product_name   | haloacid dehalogenase superfamily, subfamily IA, variant 3 with third   |          |
| 2558670072 | DRAFT_00740 | Scaffold       | DRAFT_contig_70_77_len_39784_read_count_688219.11                       |          |
| 2558670072 | DRAFT_00740 | Coordinates    | 156..911(+)                                                             |          |
| 2558670072 | DRAFT_00740 | DNA_length     | 756bp                                                                   |          |
| 2558670072 | DRAFT_00740 | Protein_length | 251aa                                                                   |          |
| 2558670072 | DRAFT_00740 | GC             |                                                                         | 0.54     |
| 2558670073 | DRAFT_00741 | pfam00583      | Acetyltransf_1                                                          | 3.80E-12 |
| 2558670073 | DRAFT_00741 | Locus_type     | CDS                                                                     |          |
| 2558670073 | DRAFT_00741 | Product_name   | Acetyltransferases                                                      |          |
| 2558670073 | DRAFT_00741 | Scaffold       | DRAFT_contig_70_77_len_39784_read_count_688219.11                       |          |
| 2558670073 | DRAFT_00741 | Coordinates    | 979..1464(-)                                                            |          |
| 2558670073 | DRAFT_00741 | DNA_length     | 486bp                                                                   |          |
| 2558670073 | DRAFT_00741 | Protein_length | 161aa                                                                   |          |

|            |             |                |                                                   |      |
|------------|-------------|----------------|---------------------------------------------------|------|
| 2558670073 | DRAFT_00741 | GC             |                                                   | 0.52 |
| 2558670074 | DRAFT_00742 | Locus_type     | CDS                                               |      |
| 2558670074 | DRAFT_00742 | Product_name   | hypothetical protein                              |      |
| 2558670074 | DRAFT_00742 | Scaffold       | DRAFT_contig_70_77_len_39784_read_count_688219.11 |      |
| 2558670074 | DRAFT_00742 | Coordinates    | 1809..2336(+)                                     |      |
| 2558670074 | DRAFT_00742 | DNA_length     | 528bp                                             |      |
| 2558670074 | DRAFT_00742 | Protein_length | 175aa                                             |      |
| 2558670074 | DRAFT_00742 | GC             |                                                   | 0.55 |
| 2558670074 | DRAFT_00742 | Transmembrane  | Yes                                               |      |
| 2558670075 | DRAFT_00743 | Locus_type     | CDS                                               |      |
| 2558670075 | DRAFT_00743 | Product_name   | hypothetical protein                              |      |
| 2558670075 | DRAFT_00743 | Scaffold       | DRAFT_contig_70_77_len_39784_read_count_688219.11 |      |
| 2558670075 | DRAFT_00743 | Coordinates    | 2429..2989(+)                                     |      |
| 2558670075 | DRAFT_00743 | DNA_length     | 561bp                                             |      |
| 2558670075 | DRAFT_00743 | Protein_length | 186aa                                             |      |
| 2558670075 | DRAFT_00743 | GC             |                                                   | 0.54 |
| 2558670076 | DRAFT_00744 | Locus_type     | CDS                                               |      |
| 2558670076 | DRAFT_00744 | Product_name   | hypothetical protein                              |      |
| 2558670076 | DRAFT_00744 | Scaffold       | DRAFT_contig_70_77_len_39784_read_count_688219.11 |      |
| 2558670076 | DRAFT_00744 | Coordinates    | 3108..3428(+)                                     |      |
| 2558670076 | DRAFT_00744 | DNA_length     | 321bp                                             |      |
| 2558670076 | DRAFT_00744 | Protein_length | 106aa                                             |      |
| 2558670076 | DRAFT_00744 | GC             |                                                   | 0.55 |
| 2558670076 | DRAFT_00744 | Transmembrane  | Yes                                               |      |
| 2558670077 | DRAFT_00745 | Locus_type     | CDS                                               |      |
| 2558670077 | DRAFT_00745 | Product_name   | hypothetical protein                              |      |
| 2558670077 | DRAFT_00745 | Scaffold       | DRAFT_contig_70_77_len_39784_read_count_688219.11 |      |
| 2558670077 | DRAFT_00745 | Coordinates    | 3467..3715(-)                                     |      |
| 2558670077 | DRAFT_00745 | DNA_length     | 249bp                                             |      |
| 2558670077 | DRAFT_00745 | Protein_length | 82aa                                              |      |

|            |             |                |                                                                        |          |
|------------|-------------|----------------|------------------------------------------------------------------------|----------|
| 2558670077 | DRAFT_00745 | GC             |                                                                        | 0.57     |
| 2558670078 | DRAFT_00746 | KEGG_module    | M00117: Ubiquinone biosynthesis, prokaryotes, chorismate => ubiquinone |          |
| 2558670078 | DRAFT_00746 | Metacyc        | PWY-6627: salinosporamide A biosynthesis                               |          |
| 2558670078 | DRAFT_00746 | Metacyc        | PWY-7007: methyl ketone biosynthesis                                   |          |
| 2558670078 | DRAFT_00746 | Metacyc        | PWY-5113: UDP-D-apiose biosynthesis (from UDP-D-glucuronate)           |          |
| 2558670078 | DRAFT_00746 | Metacyc        | PWY30-19: ubiquinol-6 biosynthesis (eukaryotic)                        |          |
| 2558670078 | DRAFT_00746 | Metacyc        | PWY-181: photorespiration                                              |          |
| 2558670078 | DRAFT_00746 | Metacyc        | PWY-6585: 2-tridecanone biosynthesis                                   |          |
| 2558670078 | DRAFT_00746 | Metacyc        | PWY-5856: ubiquinol-9 biosynthesis (prokaryotic)                       |          |
| 2558670078 | DRAFT_00746 | Metacyc        | PWY-5855: ubiquinol-7 biosynthesis (prokaryotic)                       |          |
| 2558670078 | DRAFT_00746 | Metacyc        | PWY-5870: ubiquinol-8 biosynthesis (eukaryotic)                        |          |
| 2558670078 | DRAFT_00746 | Metacyc        | PWY-3385: choline biosynthesis I                                       |          |
| 2558670078 | DRAFT_00746 | Metacyc        | PWY-5163: <l>p</l>-cumate degradation to 2-oxopent-4-enoate            |          |
| 2558670078 | DRAFT_00746 | Metacyc        | PWY-6559: spermidine biosynthesis II                                   |          |
| 2558670078 | DRAFT_00746 | Metacyc        | PWY-5826: hypoglycin biosynthesis                                      |          |
| 2558670078 | DRAFT_00746 | Metacyc        | PWY-5873: ubiquinol-7 biosynthesis (eukaryotic)                        |          |
| 2558670078 | DRAFT_00746 | Metacyc        | PWY-5871: ubiquinol-9 biosynthesis (eukaryotic)                        |          |
| 2558670078 | DRAFT_00746 | Metacyc        | PWY-6708: ubiquinol-8 biosynthesis (prokaryotic)                       |          |
| 2558670078 | DRAFT_00746 | Metacyc        | PWY-5857: ubiquinol-10 biosynthesis (prokaryotic)                      |          |
| 2558670078 | DRAFT_00746 | Metacyc        | PWY-5872: ubiquinol-10 biosynthesis (eukaryotic)                       |          |
| 2558670078 | DRAFT_00746 | COG_category   | [H] Coenzyme transport and metabolism                                  |          |
| 2558670078 | DRAFT_00746 | COG0163        | 3-polyprenyl-4-hydroxybenzoate decarboxylase                           | 4.00E-69 |
| 2558670078 | DRAFT_00746 | pfam02441      | Flavoprotein                                                           | 8.60E-25 |
| 2558670078 | DRAFT_00746 | EC:4.1.1.-     | Lyases. Carbon-carbon lyases. Carboxy-lyases.                          |          |
| 2558670078 | DRAFT_00746 | TIGR00421      | polyprenyl P-hydroxybenzoate and phenylacrylic acid decarboxylases     | 8.10E-72 |
| 2558670078 | DRAFT_00746 | KO:K03186      | 3-octaprenyl-4-hydroxybenzoate carboxy-lyase UbiX [EC:4.1.1.-]         | 0.00E+00 |
| 2558670078 | DRAFT_00746 | Locus_type     | CDS                                                                    |          |
| 2558670078 | DRAFT_00746 | Product_name   | polyprenyl P-hydroxybenzoate and phenylacrylic acid decarboxylases     |          |
| 2558670078 | DRAFT_00746 | Scaffold       | DRAFT_contig_70_77_len_39784_read_count_688219.11                      |          |
| 2558670078 | DRAFT_00746 | Coordinates    | 5075..5659(+)                                                          |          |
| 2558670078 | DRAFT_00746 | DNA_length     | 585bp                                                                  |          |
| 2558670078 | DRAFT_00746 | Protein_length | 194aa                                                                  |          |
| 2558670078 | DRAFT_00746 | GC             |                                                                        | 0.58     |

|            |             |                |                                                                        |           |
|------------|-------------|----------------|------------------------------------------------------------------------|-----------|
| 2558670079 | DRAFT_00747 | COG_category   | [S] Function unknown                                                   |           |
| 2558670079 | DRAFT_00747 | COG1786        | Uncharacterized conserved protein                                      | 5.00E-33  |
| 2558670079 | DRAFT_00747 | pfam01989      | DUF126                                                                 | 2.40E-34  |
| 2558670079 | DRAFT_00747 | KO:K09128      | hypothetical protein                                                   | 6.50E-34  |
| 2558670079 | DRAFT_00747 | ITERM:01401    | predicted aconitase subunit 2 (EC 4.2.1.3)                             |           |
| 2558670079 | DRAFT_00747 | Locus_type     | CDS                                                                    |           |
| 2558670079 | DRAFT_00747 | Product_name   | predicted aconitase subunit 2 (EC 4.2.1.3)                             |           |
| 2558670079 | DRAFT_00747 | Scaffold       | DRAFT_contig_70_77_len_39784_read_count_688219.11                      |           |
| 2558670079 | DRAFT_00747 | Coordinates    | 5731..6138(-)                                                          |           |
| 2558670079 | DRAFT_00747 | DNA_length     | 408bp                                                                  |           |
| 2558670079 | DRAFT_00747 | Protein_length | 135aa                                                                  |           |
| 2558670079 | DRAFT_00747 | GC             |                                                                        | 0.58      |
| 2558670080 | DRAFT_00748 | COG_category   | [S] Function unknown                                                   |           |
| 2558670080 | DRAFT_00748 | COG1679        | Uncharacterized conserved protein                                      | 4.00E-129 |
| 2558670080 | DRAFT_00748 | pfam04412      | DUF521                                                                 | 0.00E+00  |
| 2558670080 | DRAFT_00748 | KO:K09123      | hypothetical protein                                                   | 0.00E+00  |
| 2558670080 | DRAFT_00748 | ITERM:01400    | predicted aconitase subunit 1 (EC 4.2.1.3)                             |           |
| 2558670080 | DRAFT_00748 | Locus_type     | CDS                                                                    |           |
| 2558670080 | DRAFT_00748 | Product_name   | predicted aconitase subunit 1 (EC 4.2.1.3)                             |           |
| 2558670080 | DRAFT_00748 | Scaffold       | DRAFT_contig_70_77_len_39784_read_count_688219.11                      |           |
| 2558670080 | DRAFT_00748 | Coordinates    | 6108..7292(-)                                                          |           |
| 2558670080 | DRAFT_00748 | DNA_length     | 1185bp                                                                 |           |
| 2558670080 | DRAFT_00748 | Protein_length | 394aa                                                                  |           |
| 2558670080 | DRAFT_00748 | GC             |                                                                        | 0.59      |
| 2558670081 | DRAFT_00749 | COG_category   | [H] Coenzyme transport and metabolism                                  |           |
| 2558670081 | DRAFT_00749 | COG0043        | 3-polyprenyl-4-hydroxybenzoate decarboxylase and related decarboxylase | 2.00E-97  |
| 2558670081 | DRAFT_00749 | pfam01977      | UbiD                                                                   | 3.10E-109 |
| 2558670081 | DRAFT_00749 | TIGR00148      | UbiD family decarboxylase                                              | 9.00E-107 |
| 2558670081 | DRAFT_00749 | Locus_type     | CDS                                                                    |           |
| 2558670081 | DRAFT_00749 | Product_name   | UbiD family decarboxylase                                              |           |
| 2558670081 | DRAFT_00749 | Scaffold       | DRAFT_contig_70_77_len_39784_read_count_688219.11                      |           |

|            |             |                |                                                                                             |          |
|------------|-------------|----------------|---------------------------------------------------------------------------------------------|----------|
| 2558670081 | DRAFT_00749 | Coordinates    | 7300..8598(-)                                                                               |          |
| 2558670081 | DRAFT_00749 | DNA_length     | 1299bp                                                                                      |          |
| 2558670081 | DRAFT_00749 | Protein_length | 432aa                                                                                       |          |
| 2558670081 | DRAFT_00749 | GC             |                                                                                             | 0.57     |
| 2558670082 | DRAFT_00750 | Locus_type     | CDS                                                                                         |          |
| 2558670082 | DRAFT_00750 | Product_name   | hypothetical protein                                                                        |          |
| 2558670082 | DRAFT_00750 | Scaffold       | DRAFT_contig_70_77_len_39784_read_count_688219.11                                           |          |
| 2558670082 | DRAFT_00750 | Coordinates    | 8763..9203(+)                                                                               |          |
| 2558670082 | DRAFT_00750 | DNA_length     | 441bp                                                                                       |          |
| 2558670082 | DRAFT_00750 | Protein_length | 146aa                                                                                       |          |
| 2558670082 | DRAFT_00750 | GC             |                                                                                             | 0.52     |
| 2558670082 | DRAFT_00750 | Transmembrane  | Yes                                                                                         |          |
| 2558670083 | DRAFT_00751 | KEGG_module    | M00133: Polyamine biosynthesis, arginine => agmatine => putrescine => spermidine            |          |
| 2558670083 | DRAFT_00751 | Metacyc        | PWY-6834: spermidine biosynthesis III                                                       |          |
| 2558670083 | DRAFT_00751 | Metacyc        | PWY0-823: arginine degradation III (arginine decarboxylase/agmatinase pathway)              |          |
| 2558670083 | DRAFT_00751 | Metacyc        | PWY0-1299: arginine dependent acid resistance                                               |          |
| 2558670083 | DRAFT_00751 | Metacyc        | PWY-40: putrescine biosynthesis I                                                           |          |
| 2558670083 | DRAFT_00751 | Metacyc        | PWY-6305: putrescine biosynthesis IV                                                        |          |
| 2558670083 | DRAFT_00751 | Metacyc        | ARGDEG-III-PWY: arginine degradation IV (arginine decarboxylase/agmatine deiminase pathway) |          |
| 2558670083 | DRAFT_00751 | Metacyc        | PWY-43: putrescine biosynthesis II                                                          |          |
| 2558670083 | DRAFT_00751 | IMG_pathway    | 186: L-arginine degradation by Arg decarboxylase pathway                                    |          |
| 2558670083 | DRAFT_00751 | IMG_pathway    | 524: Spermidine synthesis via aminopropylagmatine                                           |          |
| 2558670083 | DRAFT_00751 | IMG_pathway    | 823: Putrescine synthesis from L-arginine                                                   |          |
| 2558670083 | DRAFT_00751 | COG_category   | [S] Function unknown                                                                        |          |
| 2558670083 | DRAFT_00751 | COG1945        | Uncharacterized conserved protein                                                           | 8.00E-37 |
| 2558670083 | DRAFT_00751 | pfam01862      | PvlArgDC                                                                                    | 1.30E-57 |
| 2558670083 | DRAFT_00751 | EC:4.1.1.19    | Arginine decarboxylase.                                                                     |          |
| 2558670083 | DRAFT_00751 | TIGR00286      | arginine decarboxylase, pyruvoyl-dependent                                                  | 5.00E-35 |
| 2558670083 | DRAFT_00751 | KO:K02626      | arginine decarboxylase [EC:4.1.1.19]                                                        | 0.00E+00 |
| 2558670083 | DRAFT_00751 | ITERM:00488    | arginine decarboxylase (EC 4.1.1.19)                                                        |          |
| 2558670083 | DRAFT_00751 | Locus_type     | CDS                                                                                         |          |
| 2558670083 | DRAFT_00751 | Product_name   | arginine decarboxylase (EC 4.1.1.19)                                                        |          |

|            |             |                |                                                                     |          |
|------------|-------------|----------------|---------------------------------------------------------------------|----------|
| 2558670083 | DRAFT_00751 | Scaffold       | DRAFT_contig_70_77_len_39784_read_count_688219.11                   |          |
| 2558670083 | DRAFT_00751 | Coordinates    | 9353..9922(-)                                                       |          |
| 2558670083 | DRAFT_00751 | DNA_length     | 570bp                                                               |          |
| 2558670083 | DRAFT_00751 | Protein_length | 189aa                                                               |          |
| 2558670083 | DRAFT_00751 | GC             |                                                                     | 0.56     |
| 2558670084 | DRAFT_00752 | KEGG_module    | M00555: Betaine biosynthesis, choline => betaine                    |          |
| 2558670084 | DRAFT_00752 | Metacyc        | PWY-3722: glycine betaine biosynthesis II (Gram-positive bacteria)  |          |
| 2558670084 | DRAFT_00752 | Metacyc        | BETSYN-PWY: glycine betaine biosynthesis I (Gram-negative bacteria) |          |
| 2558670084 | DRAFT_00752 | Metacyc        | CHOLINE-BETAINE-ANA-PWY: choline degradation I                      |          |
| 2558670084 | DRAFT_00752 | Metacyc        | PWY1F-353: glycine betaine biosynthesis III (plants)                |          |
| 2558670084 | DRAFT_00752 | COG_category   | [C] Energy production and conversion                                |          |
| 2558670084 | DRAFT_00752 | COG1012        | NAD-dependent aldehyde dehydrogenases                               | 0.00E+00 |
| 2558670084 | DRAFT_00752 | pfam00171      | Aldedh                                                              | 0.00E+00 |
| 2558670084 | DRAFT_00752 | EC:1.2.1.8     | Betaine-aldehyde dehydrogenase.                                     |          |
| 2558670084 | DRAFT_00752 | TIGR03374      | 1-pyrroline dehydrogenase                                           | 0.00E+00 |
| 2558670084 | DRAFT_00752 | KO:K00130      | betaine-aldehyde dehydrogenase [EC:1.2.1.8]                         | 0.00E+00 |
| 2558670084 | DRAFT_00752 | Locus_type     | CDS                                                                 |          |
| 2558670084 | DRAFT_00752 | Product_name   | NAD-dependent aldehyde dehydrogenases                               |          |
| 2558670084 | DRAFT_00752 | Scaffold       | DRAFT_contig_70_77_len_39784_read_count_688219.11                   |          |
| 2558670084 | DRAFT_00752 | Coordinates    | 10113..11615(-)                                                     |          |
| 2558670084 | DRAFT_00752 | DNA_length     | 1503bp                                                              |          |
| 2558670084 | DRAFT_00752 | Protein_length | 500aa                                                               |          |
| 2558670084 | DRAFT_00752 | GC             |                                                                     | 0.56     |
| 2558670085 | DRAFT_00753 | KEGG_module    | M00239: Peptides/nickel transport system                            |          |
| 2558670085 | DRAFT_00753 | COG_category   | [E] Amino acid transport and metabolism                             |          |
| 2558670085 | DRAFT_00753 | COG0747        | ABC-type dipeptide transport system, periplasmic component          | 4.00E-45 |
| 2558670085 | DRAFT_00753 | pfam00496      | SBP_bac_5                                                           | 1.10E-57 |
| 2558670085 | DRAFT_00753 | KO:K02035      | peptide/nickel transport system substrate-binding protein           | 0.00E+00 |
| 2558670085 | DRAFT_00753 | Locus_type     | CDS                                                                 |          |
| 2558670085 | DRAFT_00753 | Product_name   | ABC-type dipeptide transport system, periplasmic component          |          |
| 2558670085 | DRAFT_00753 | Scaffold       | DRAFT_contig_70_77_len_39784_read_count_688219.11                   |          |
| 2558670085 | DRAFT_00753 | Coordinates    | 11891..13756(+)                                                     |          |

|            |             |                |                                                                       |                                                                    |          |
|------------|-------------|----------------|-----------------------------------------------------------------------|--------------------------------------------------------------------|----------|
| 2558670085 | DRAFT_00753 | DNA_length     |                                                                       | 1866bp                                                             |          |
| 2558670085 | DRAFT_00753 | Protein_length |                                                                       | 621aa                                                              |          |
| 2558670085 | DRAFT_00753 | GC             |                                                                       |                                                                    | 0.54     |
| 2558670085 | DRAFT_00753 | Transmembrane  |                                                                       | Yes                                                                |          |
| 2558670086 | DRAFT_00754 | pfam00528      | BPD_transp_1                                                          |                                                                    | 1.40E-33 |
| 2558670086 | DRAFT_00754 | Locus_type     |                                                                       | CDS                                                                |          |
| 2558670086 | DRAFT_00754 | Product_name   |                                                                       | ABC-type dipeptide/oligopeptide/nickel transport systems, permease |          |
| 2558670086 | DRAFT_00754 | Scaffold       |                                                                       | DRAFT_contig_70_77_len_39784_read_count_688219.11                  |          |
| 2558670086 | DRAFT_00754 | Coordinates    |                                                                       | 14105..14803(+)                                                    |          |
| 2558670086 | DRAFT_00754 | DNA_length     |                                                                       | 699bp                                                              |          |
| 2558670086 | DRAFT_00754 | Protein_length |                                                                       | 232aa                                                              |          |
| 2558670086 | DRAFT_00754 | GC             |                                                                       |                                                                    | 0.52     |
| 2558670086 | DRAFT_00754 | Transmembrane  |                                                                       | Yes                                                                |          |
| 2558670087 | DRAFT_00755 | KEGG_module    | M00239: Peptides/nickel transport system                              |                                                                    |          |
| 2558670087 | DRAFT_00755 | COG_category   | [E] Amino acid transport and metabolism                               |                                                                    |          |
| 2558670087 | DRAFT_00755 | COG_category   | [P] Inorganic ion transport and metabolism                            |                                                                    |          |
| 2558670087 | DRAFT_00755 | COG1173        | ABC-type dipeptide/oligopeptide/nickel transport systems, permease c  |                                                                    | 9.00E-57 |
| 2558670087 | DRAFT_00755 | pfam00528      | BPD_transp_1                                                          |                                                                    | 2.50E-21 |
| 2558670087 | DRAFT_00755 | KO:K02034      | peptide/nickel transport system permease protein                      |                                                                    | 0.00E+00 |
| 2558670087 | DRAFT_00755 | Locus_type     |                                                                       | CDS                                                                |          |
| 2558670087 | DRAFT_00755 | Product_name   |                                                                       | ABC-type dipeptide/oligopeptide/nickel transport systems, permease |          |
| 2558670087 | DRAFT_00755 | Scaffold       |                                                                       | DRAFT_contig_70_77_len_39784_read_count_688219.11                  |          |
| 2558670087 | DRAFT_00755 | Coordinates    |                                                                       | 14800..15801(+)                                                    |          |
| 2558670087 | DRAFT_00755 | DNA_length     |                                                                       | 1002bp                                                             |          |
| 2558670087 | DRAFT_00755 | Protein_length |                                                                       | 333aa                                                              |          |
| 2558670087 | DRAFT_00755 | GC             |                                                                       |                                                                    | 0.55     |
| 2558670087 | DRAFT_00755 | Transmembrane  |                                                                       | Yes                                                                |          |
| 2558670088 | DRAFT_00756 | KEGG_module    | M00439: Oligopeptide transport system                                 |                                                                    |          |
| 2558670088 | DRAFT_00756 | pfam00005      | ABC_tran                                                              |                                                                    | 2.40E-33 |
| 2558670088 | DRAFT_00756 | pfam08352      | oligo_HPY                                                             |                                                                    | 7.90E-11 |
| 2558670088 | DRAFT_00756 | TIGR01727      | oligopeptide/dipeptide ABC transporter, ATP-binding protein, C-termin |                                                                    | 5.90E-16 |

|            |             |                |                                                                       |           |
|------------|-------------|----------------|-----------------------------------------------------------------------|-----------|
| 2558670088 | DRAFT_00756 | KO:K10823      | oligopeptide transport system ATP-binding protein                     | 0.00E+00  |
| 2558670088 | DRAFT_00756 | Locus_type     | CDS                                                                   |           |
| 2558670088 | DRAFT_00756 | Product_name   | oligopeptide/dipeptide ABC transporter, ATP-binding protein, C-termi  |           |
| 2558670088 | DRAFT_00756 | Scaffold       | DRAFT_contig_70_77_len_39784_read_count_688219.11                     |           |
| 2558670088 | DRAFT_00756 | Coordinates    | 15757..16725(-)                                                       |           |
| 2558670088 | DRAFT_00756 | DNA_length     | 969bp                                                                 |           |
| 2558670088 | DRAFT_00756 | Protein_length | 322aa                                                                 |           |
| 2558670088 | DRAFT_00756 | GC             |                                                                       | 0.54      |
| 2558670089 | DRAFT_00757 | KEGG_module    | M00439: Oligopeptide transport system                                 |           |
| 2558670089 | DRAFT_00757 | COG_category   | [P] Inorganic ion transport and metabolism                            |           |
| 2558670089 | DRAFT_00757 | COG_category   | [E] Amino acid transport and metabolism                               |           |
| 2558670089 | DRAFT_00757 | COG0444        | ABC-type dipeptide/oligopeptide/nickel transport system, ATPase com   | 4.00E-108 |
| 2558670089 | DRAFT_00757 | pfam00005      | ABC_tran                                                              | 2.10E-27  |
| 2558670089 | DRAFT_00757 | pfam08352      | oligo_HPY                                                             | 4.50E-17  |
| 2558670089 | DRAFT_00757 | TIGR01727      | oligopeptide/dipeptide ABC transporter, ATP-binding protein, C-termin | 2.90E-27  |
| 2558670089 | DRAFT_00757 | KO:K15583      | oligopeptide transport system ATP-binding protein                     | 0.00E+00  |
| 2558670089 | DRAFT_00757 | Locus_type     | CDS                                                                   |           |
| 2558670089 | DRAFT_00757 | Product_name   | oligopeptide/dipeptide ABC transporter, ATP-binding protein, C-termi  |           |
| 2558670089 | DRAFT_00757 | Scaffold       | DRAFT_contig_70_77_len_39784_read_count_688219.11                     |           |
| 2558670089 | DRAFT_00757 | Coordinates    | 16703..17779(-)                                                       |           |
| 2558670089 | DRAFT_00757 | DNA_length     | 1077bp                                                                |           |
| 2558670089 | DRAFT_00757 | Protein_length | 358aa                                                                 |           |
| 2558670089 | DRAFT_00757 | GC             |                                                                       | 0.53      |
| 2558670090 | DRAFT_00758 | Locus_type     | CDS                                                                   |           |
| 2558670090 | DRAFT_00758 | Product_name   | hypothetical protein                                                  |           |
| 2558670090 | DRAFT_00758 | Scaffold       | DRAFT_contig_70_77_len_39784_read_count_688219.11                     |           |
| 2558670090 | DRAFT_00758 | Coordinates    | 17857..18543(-)                                                       |           |
| 2558670090 | DRAFT_00758 | DNA_length     | 687bp                                                                 |           |
| 2558670090 | DRAFT_00758 | Protein_length | 228aa                                                                 |           |
| 2558670090 | DRAFT_00758 | GC             |                                                                       | 0.48      |
| 2558670091 | DRAFT_00759 | COG_category   | [L] Replication, recombination and repair                             |           |



|            |             |                |                                                            |          |
|------------|-------------|----------------|------------------------------------------------------------|----------|
| 2558670091 | DRAFT_00759 | COG3316        | Transposase and inactivated derivatives                    | 1.00E-09 |
| 2558670091 | DRAFT_00759 | pfam13610      | DDE_Tnp_IS240                                              | 1.90E-19 |
| 2558670091 | DRAFT_00759 | pfam04434      | SWIM                                                       | 4.30E-06 |
| 2558670091 | DRAFT_00759 | Locus_type     | CDS                                                        |          |
| 2558670091 | DRAFT_00759 | Product_name   | Transposase and inactivated derivatives                    |          |
| 2558670091 | DRAFT_00759 | Scaffold       | DRAFT_contig_70_77_len_39784_read_count_688219.11          |          |
| 2558670091 | DRAFT_00759 | Coordinates    | 18515..19657(-)                                            |          |
| 2558670091 | DRAFT_00759 | DNA_length     | 1143bp                                                     |          |
| 2558670091 | DRAFT_00759 | Protein_length | 380aa                                                      |          |
| 2558670091 | DRAFT_00759 | GC             |                                                            | 0.57     |
| 2558670092 | DRAFT_00760 | Locus_type     | CDS                                                        |          |
| 2558670092 | DRAFT_00760 | Product_name   | hypothetical protein                                       |          |
| 2558670092 | DRAFT_00760 | Scaffold       | DRAFT_contig_70_77_len_39784_read_count_688219.11          |          |
| 2558670092 | DRAFT_00760 | Coordinates    | 19815..19958(+)                                            |          |
| 2558670092 | DRAFT_00760 | DNA_length     | 144bp                                                      |          |
| 2558670092 | DRAFT_00760 | Protein_length | 47aa                                                       |          |
| 2558670092 | DRAFT_00760 | GC             |                                                            | 0.51     |
| 2558670093 | DRAFT_00761 | Locus_type     | CDS                                                        |          |
| 2558670093 | DRAFT_00761 | Product_name   | hypothetical protein                                       |          |
| 2558670093 | DRAFT_00761 | Scaffold       | DRAFT_contig_70_77_len_39784_read_count_688219.11          |          |
| 2558670093 | DRAFT_00761 | Coordinates    | 19965..21323(+)                                            |          |
| 2558670093 | DRAFT_00761 | DNA_length     | 1359bp                                                     |          |
| 2558670093 | DRAFT_00761 | Protein_length | 452aa                                                      |          |
| 2558670093 | DRAFT_00761 | GC             |                                                            | 0.5      |
| 2558670093 | DRAFT_00761 | Transmembrane  | Yes                                                        |          |
| 2558670094 | DRAFT_00762 | KEGG_module    | M00121: Heme biosynthesis, glutamate => protoheme/siroheme |          |
| 2558670094 | DRAFT_00762 | Metacyc        | PWY-5188: tetrapyrrole biosynthesis I (from glutamate)     |          |
| 2558670094 | DRAFT_00762 | COG_category   | [H] Coenzyme transport and metabolism                      |          |
| 2558670094 | DRAFT_00762 | COG0001        | Glutamate-1-semialdehyde aminotransferase                  | 0.00E+00 |
| 2558670094 | DRAFT_00762 | pfam00202      | Aminotran_3                                                | 5.60E-65 |
| 2558670094 | DRAFT_00762 | EC:5.4.3.8     | Glutamate-1-semialdehyde 2,1-aminomutase.                  |          |

|            |             |                |                                                       |          |
|------------|-------------|----------------|-------------------------------------------------------|----------|
| 2558670094 | DRAFT_00762 | TIGR00713      | glutamate-1-semialdehyde-2,1-aminomutase              | 0.00E+00 |
| 2558670094 | DRAFT_00762 | KO:K01845      | glutamate-1-semialdehyde 2,1-aminomutase [EC:5.4.3.8] | 0.00E+00 |
| 2558670094 | DRAFT_00762 | Locus_type     | CDS                                                   |          |
| 2558670094 | DRAFT_00762 | Product_name   | Glutamate-1-semialdehyde aminotransferase             |          |
| 2558670094 | DRAFT_00762 | Scaffold       | DRAFT_contig_70_77_len_39784_read_count_688219.11     |          |
| 2558670094 | DRAFT_00762 | Coordinates    | 21667..23085(-)                                       |          |
| 2558670094 | DRAFT_00762 | DNA_length     | 1419bp                                                |          |
| 2558670094 | DRAFT_00762 | Protein_length | 472aa                                                 |          |
| 2558670094 | DRAFT_00762 | GC             |                                                       | 0.54     |
|            |             |                |                                                       |          |
| 2558670095 | DRAFT_00763 | Locus_type     | CDS                                                   |          |
| 2558670095 | DRAFT_00763 | Product_name   | hypothetical protein                                  |          |
| 2558670095 | DRAFT_00763 | Scaffold       | DRAFT_contig_70_77_len_39784_read_count_688219.11     |          |
| 2558670095 | DRAFT_00763 | Coordinates    | 23066..23305(-)                                       |          |
| 2558670095 | DRAFT_00763 | DNA_length     | 240bp                                                 |          |
| 2558670095 | DRAFT_00763 | Protein_length | 79aa                                                  |          |
| 2558670095 | DRAFT_00763 | GC             |                                                       | 0.51     |
|            |             |                |                                                       |          |
| 2558670096 | DRAFT_00764 | Locus_type     | CDS                                                   |          |
| 2558670096 | DRAFT_00764 | Product_name   | hypothetical protein                                  |          |
| 2558670096 | DRAFT_00764 | Scaffold       | DRAFT_contig_70_77_len_39784_read_count_688219.11     |          |
| 2558670096 | DRAFT_00764 | Coordinates    | 23247..23378(-)                                       |          |
| 2558670096 | DRAFT_00764 | DNA_length     | 132bp                                                 |          |
| 2558670096 | DRAFT_00764 | Protein_length | 43aa                                                  |          |
| 2558670096 | DRAFT_00764 | GC             |                                                       | 0.48     |
|            |             |                |                                                       |          |
| 2558670097 | DRAFT_00765 | Locus_type     | CDS                                                   |          |
| 2558670097 | DRAFT_00765 | Product_name   | hypothetical protein                                  |          |
| 2558670097 | DRAFT_00765 | Scaffold       | DRAFT_contig_70_77_len_39784_read_count_688219.11     |          |
| 2558670097 | DRAFT_00765 | Coordinates    | 23652..23930(+)                                       |          |
| 2558670097 | DRAFT_00765 | DNA_length     | 279bp                                                 |          |
| 2558670097 | DRAFT_00765 | Protein_length | 92aa                                                  |          |
| 2558670097 | DRAFT_00765 | GC             |                                                       | 0.51     |

|            |             |                |                                                                |           |
|------------|-------------|----------------|----------------------------------------------------------------|-----------|
| 2558670098 | DRAFT_00766 | KEGG_module    | M00033: Ectoine biosynthesis, aspartate => ectoine             |           |
| 2558670098 | DRAFT_00766 | Metacyc        | P101-PWY: ectoine biosynthesis                                 |           |
| 2558670098 | DRAFT_00766 | Metacyc        | PWY-761: rhizobactin 1021 biosynthesis                         |           |
| 2558670098 | DRAFT_00766 | Metacyc        | PWY-6409: pyoverdine I biosynthesis                            |           |
| 2558670098 | DRAFT_00766 | Metacyc        | PWY-6562: norspermidine biosynthesis                           |           |
| 2558670098 | DRAFT_00766 | COG_category   | [E] Amino acid transport and metabolism                        |           |
| 2558670098 | DRAFT_00766 | COG0160        | 4-aminobutyrate aminotransferase and related aminotransferases | 4.00E-121 |
| 2558670098 | DRAFT_00766 | pfam00202      | Aminotran_3                                                    | 1.00E-85  |
| 2558670098 | DRAFT_00766 | EC:2.6.1.76    | Diaminobutyrate--2-oxoglutarate transaminase.                  |           |
| 2558670098 | DRAFT_00766 | KO:K00836      | diaminobutyrate-2-oxoglutarate transaminase [EC:2.6.1.76]      | 0.00E+00  |
| 2558670098 | DRAFT_00766 | Locus_type     | CDS                                                            |           |
| 2558670098 | DRAFT_00766 | Product_name   | 4-aminobutyrate aminotransferase and related aminotransferases |           |
| 2558670098 | DRAFT_00766 | Scaffold       | DRAFT_contig_70_77_len_39784_read_count_688219.11              |           |
| 2558670098 | DRAFT_00766 | Coordinates    | 24097..25458(-)                                                |           |
| 2558670098 | DRAFT_00766 | DNA_length     | 1362bp                                                         |           |
| 2558670098 | DRAFT_00766 | Protein_length | 453aa                                                          |           |
| 2558670098 | DRAFT_00766 | GC             |                                                                | 0.56      |
| 2558670099 | DRAFT_00767 | COG_category   | [E] Amino acid transport and metabolism                        |           |
| 2558670099 | DRAFT_00767 | COG1748        | Saccharopine dehydrogenase and related proteins                | 1.00E-37  |
| 2558670099 | DRAFT_00767 | pfam03435      | Saccharop_dh                                                   | 6.00E-39  |
| 2558670099 | DRAFT_00767 | Locus_type     | CDS                                                            |           |
| 2558670099 | DRAFT_00767 | Product_name   | Saccharopine dehydrogenase and related proteins                |           |
| 2558670099 | DRAFT_00767 | Scaffold       | DRAFT_contig_70_77_len_39784_read_count_688219.11              |           |
| 2558670099 | DRAFT_00767 | Coordinates    | 25738..26931(+)                                                |           |
| 2558670099 | DRAFT_00767 | DNA_length     | 1194bp                                                         |           |
| 2558670099 | DRAFT_00767 | Protein_length | 397aa                                                          |           |
| 2558670099 | DRAFT_00767 | GC             |                                                                | 0.53      |
| 2558670100 | DRAFT_00768 | pfam09594      | DUF2029                                                        | 6.40E-08  |
| 2558670100 | DRAFT_00768 | Locus_type     | CDS                                                            |           |
| 2558670100 | DRAFT_00768 | Product_name   | Predicted membrane-bound dolichyl-phosphate-mannose-protein ma |           |
| 2558670100 | DRAFT_00768 | Scaffold       | DRAFT_contig_70_77_len_39784_read_count_688219.11              |           |
| 2558670100 | DRAFT_00768 | Coordinates    | 27304..28656(-)                                                |           |

|            |             |                |                                                   |          |
|------------|-------------|----------------|---------------------------------------------------|----------|
| 2558670100 | DRAFT_00768 | DNA_length     | 1353bp                                            |          |
| 2558670100 | DRAFT_00768 | Protein_length | 450aa                                             |          |
| 2558670100 | DRAFT_00768 | GC             |                                                   | 0.55     |
| 2558670100 | DRAFT_00768 | Transmembrane  | Yes                                               |          |
|            |             |                |                                                   |          |
| 2558670101 | DRAFT_00769 | Locus_type     | CDS                                               |          |
| 2558670101 | DRAFT_00769 | Product_name   | hypothetical protein                              |          |
| 2558670101 | DRAFT_00769 | Scaffold       | DRAFT_contig_70_77_len_39784_read_count_688219.11 |          |
| 2558670101 | DRAFT_00769 | Coordinates    | 28729..29037(+)                                   |          |
| 2558670101 | DRAFT_00769 | DNA_length     | 309bp                                             |          |
| 2558670101 | DRAFT_00769 | Protein_length | 102aa                                             |          |
| 2558670101 | DRAFT_00769 | GC             |                                                   | 0.55     |
| 2558670101 | DRAFT_00769 | Transmembrane  | Yes                                               |          |
|            |             |                |                                                   |          |
| 2558670102 | DRAFT_00770 | Locus_type     | CDS                                               |          |
| 2558670102 | DRAFT_00770 | Product_name   | hypothetical protein                              |          |
| 2558670102 | DRAFT_00770 | Scaffold       | DRAFT_contig_70_77_len_39784_read_count_688219.11 |          |
| 2558670102 | DRAFT_00770 | Coordinates    | 29143..29409(-)                                   |          |
| 2558670102 | DRAFT_00770 | DNA_length     | 267bp                                             |          |
| 2558670102 | DRAFT_00770 | Protein_length | 88aa                                              |          |
| 2558670102 | DRAFT_00770 | GC             |                                                   | 0.59     |
|            |             |                |                                                   |          |
| 2558670103 | DRAFT_00771 | COG_category   | [F] Nucleotide transport and metabolism           |          |
| 2558670103 | DRAFT_00771 | COG1457        | Purine-cytosine permease and related proteins     | 1.00E-52 |
| 2558670103 | DRAFT_00771 | pfam02133      | Transp_cyt_pur                                    | 7.50E-31 |
| 2558670103 | DRAFT_00771 | TIGR00800      | NCS1 nucleoside transporter family                | 8.60E-40 |
| 2558670103 | DRAFT_00771 | KO:K03457      | nucleobase:cation symporter-1, NCS1 family        | 0.00E+00 |
| 2558670103 | DRAFT_00771 | Locus_type     | CDS                                               |          |
| 2558670103 | DRAFT_00771 | Product_name   | Purine-cytosine permease and related proteins     |          |
| 2558670103 | DRAFT_00771 | Scaffold       | DRAFT_contig_70_77_len_39784_read_count_688219.11 |          |
| 2558670103 | DRAFT_00771 | Coordinates    | 29550..30905(-)                                   |          |
| 2558670103 | DRAFT_00771 | DNA_length     | 1356bp                                            |          |
| 2558670103 | DRAFT_00771 | Protein_length | 451aa                                             |          |
| 2558670103 | DRAFT_00771 | GC             |                                                   | 0.58     |

|            |             |                |                                                        |          |
|------------|-------------|----------------|--------------------------------------------------------|----------|
| 2558670103 | DRAFT_00771 | Transmembrane  | Yes                                                    |          |
| 2558670104 | DRAFT_00772 | pfam03551      | PadR                                                   | 7.80E-11 |
| 2558670104 | DRAFT_00772 | Locus_type     | CDS                                                    |          |
| 2558670104 | DRAFT_00772 | Product_name   | Predicted transcriptional regulators                   |          |
| 2558670104 | DRAFT_00772 | Scaffold       | DRAFT_contig_70_77_len_39784_read_count_688219.11      |          |
| 2558670104 | DRAFT_00772 | Coordinates    | 30958..31335(-)                                        |          |
| 2558670104 | DRAFT_00772 | DNA_length     | 378bp                                                  |          |
| 2558670104 | DRAFT_00772 | Protein_length | 125aa                                                  |          |
| 2558670104 | DRAFT_00772 | GC             |                                                        | 0.58     |
| 2558670105 | DRAFT_00773 | COG_category   | [E] Amino acid transport and metabolism                |          |
| 2558670105 | DRAFT_00773 | COG1446        | Asparaginase                                           | 4.00E-54 |
| 2558670105 | DRAFT_00773 | pfam01112      | Asparaginase_2                                         | 1.10E-57 |
| 2558670105 | DRAFT_00773 | EC:3.4.19.5    | Beta-aspartyl-peptidase.                               |          |
| 2558670105 | DRAFT_00773 | KO:K13051      | beta-aspartyl-peptidase (threonine type) [EC:3.4.19.5] | 0.00E+00 |
| 2558670105 | DRAFT_00773 | Locus_type     | CDS                                                    |          |
| 2558670105 | DRAFT_00773 | Product_name   | Asparaginase                                           |          |
| 2558670105 | DRAFT_00773 | Scaffold       | DRAFT_contig_70_77_len_39784_read_count_688219.11      |          |
| 2558670105 | DRAFT_00773 | Coordinates    | 31533..32435(+)                                        |          |
| 2558670105 | DRAFT_00773 | DNA_length     | 903bp                                                  |          |
| 2558670105 | DRAFT_00773 | Protein_length | 300aa                                                  |          |
| 2558670105 | DRAFT_00773 | GC             |                                                        | 0.64     |
| 2558670106 | DRAFT_00774 | COG_category   | [L] Replication, recombination and repair              |          |
| 2558670106 | DRAFT_00774 | COG0608        | Single-stranded DNA-specific exonuclease               | 5.00E-09 |
| 2558670106 | DRAFT_00774 | pfam02272      | DHHA1                                                  | 3.50E-08 |
| 2558670106 | DRAFT_00774 | KO:K07463      | archaea-specific RecJ-like exonuclease                 | 0.00E+00 |
| 2558670106 | DRAFT_00774 | Locus_type     | CDS                                                    |          |
| 2558670106 | DRAFT_00774 | Product_name   | Single-stranded DNA-specific exonuclease               |          |
| 2558670106 | DRAFT_00774 | Scaffold       | DRAFT_contig_70_77_len_39784_read_count_688219.11      |          |
| 2558670106 | DRAFT_00774 | Coordinates    | 32533..33489(+)                                        |          |
| 2558670106 | DRAFT_00774 | DNA_length     | 957bp                                                  |          |
| 2558670106 | DRAFT_00774 | Protein_length | 318aa                                                  |          |

|            |             |                |                                                                        |          |
|------------|-------------|----------------|------------------------------------------------------------------------|----------|
| 2558670106 | DRAFT_00774 | GC             |                                                                        | 0.61     |
| 2558670107 | DRAFT_00775 | KEGG_module    | M00117: Ubiquinone biosynthesis, prokaryotes, chorismate => ubiquinone |          |
| 2558670107 | DRAFT_00775 | KEGG_module    | M00116: Menaquinone biosynthesis, chorismate => menaquinone            |          |
| 2558670107 | DRAFT_00775 | Metacyc        | PWY30-19: ubiquinol-6 biosynthesis (eukaryotic)                        |          |
| 2558670107 | DRAFT_00775 | Metacyc        | PWY-6708: ubiquinol-8 biosynthesis (prokaryotic)                       |          |
| 2558670107 | DRAFT_00775 | Metacyc        | PWY-5890: menaquinol-10 biosynthesis                                   |          |
| 2558670107 | DRAFT_00775 | Metacyc        | PWY-5844: menaquinol-9 biosynthesis                                    |          |
| 2558670107 | DRAFT_00775 | Metacyc        | PWY-5891: menaquinol-11 biosynthesis                                   |          |
| 2558670107 | DRAFT_00775 | Metacyc        | PWY-5849: menaquinol-6 biosynthesis                                    |          |
| 2558670107 | DRAFT_00775 | Metacyc        | PWY-5872: ubiquinol-10 biosynthesis (eukaryotic)                       |          |
| 2558670107 | DRAFT_00775 | Metacyc        | MENAQUINONESYN-PWY: menaquinol-8 biosynthesis                          |          |
| 2558670107 | DRAFT_00775 | Metacyc        | PWY-5857: ubiquinol-10 biosynthesis (prokaryotic)                      |          |
| 2558670107 | DRAFT_00775 | Metacyc        | PWY-5892: menaquinol-12 biosynthesis                                   |          |
| 2558670107 | DRAFT_00775 | Metacyc        | PWY-5873: ubiquinol-7 biosynthesis (eukaryotic)                        |          |
| 2558670107 | DRAFT_00775 | Metacyc        | PWY-5871: ubiquinol-9 biosynthesis (eukaryotic)                        |          |
| 2558670107 | DRAFT_00775 | Metacyc        | PWY-5856: ubiquinol-9 biosynthesis (prokaryotic)                       |          |
| 2558670107 | DRAFT_00775 | Metacyc        | PWY-5895: menaquinol-13 biosynthesis                                   |          |
| 2558670107 | DRAFT_00775 | Metacyc        | PWY-5839: menaquinol-7 biosynthesis                                    |          |
| 2558670107 | DRAFT_00775 | Metacyc        | PWY-5855: ubiquinol-7 biosynthesis (prokaryotic)                       |          |
| 2558670107 | DRAFT_00775 | Metacyc        | PWY-5870: ubiquinol-8 biosynthesis (eukaryotic)                        |          |
| 2558670107 | DRAFT_00775 | COG_category   | [H] Coenzyme transport and metabolism                                  |          |
| 2558670107 | DRAFT_00775 | COG2226        | Methylase involved in ubiquinone/menaquinone biosynthesis              | 2.00E-18 |
| 2558670107 | DRAFT_00775 | pfam08241      | Methyltransf_11                                                        | 4.50E-12 |
| 2558670107 | DRAFT_00775 | EC:2.1.1.163   | Demethylmenaquinone methyltransferase.                                 |          |
| 2558670107 | DRAFT_00775 | EC:2.1.1.201   | 2-methoxy-6-polyprenyl-1,4-benzoquinol methylase.                      |          |
| 2558670107 | DRAFT_00775 | KO:K03183      | ubiquinone/menaquinone biosynthesis methyltransferase [EC:2.1.1.16     | 3.80E-34 |
| 2558670107 | DRAFT_00775 | Locus_type     | CDS                                                                    |          |
| 2558670107 | DRAFT_00775 | Product_name   | Methylase involved in ubiquinone/menaquinone biosynthesis              |          |
| 2558670107 | DRAFT_00775 | Scaffold       | DRAFT_contig_70_77_len_39784_read_count_688219.11                      |          |
| 2558670107 | DRAFT_00775 | Coordinates    | 33486..34172(-)                                                        |          |
| 2558670107 | DRAFT_00775 | DNA_length     | 687bp                                                                  |          |
| 2558670107 | DRAFT_00775 | Protein_length | 228aa                                                                  |          |
| 2558670107 | DRAFT_00775 | GC             |                                                                        | 0.61     |

|            |             |                |                                                                     |          |
|------------|-------------|----------------|---------------------------------------------------------------------|----------|
| 2558670107 | DRAFT_00775 | Transmembrane  | Yes                                                                 |          |
| 2558670108 | DRAFT_00776 | COG_category   | [G] Carbohydrate transport and metabolism                           |          |
| 2558670108 | DRAFT_00776 | COG0063        | Predicted sugar kinase                                              | 2.00E-52 |
| 2558670108 | DRAFT_00776 | pfam01256      | Carb_kinase                                                         | 8.10E-50 |
| 2558670108 | DRAFT_00776 | TIGR00196      | yjeF C-terminal region, hydroxyethylthiazole kinase-related         | 2.00E-71 |
| 2558670108 | DRAFT_00776 | Locus_type     | CDS                                                                 |          |
| 2558670108 | DRAFT_00776 | Product_name   | yjeF C-terminal region, hydroxyethylthiazole kinase-related         |          |
| 2558670108 | DRAFT_00776 | Scaffold       | DRAFT_contig_70_77_len_39784_read_count_688219.11                   |          |
| 2558670108 | DRAFT_00776 | Coordinates    | 34259..35125(-)                                                     |          |
| 2558670108 | DRAFT_00776 | DNA_length     | 867bp                                                               |          |
| 2558670108 | DRAFT_00776 | Protein_length | 288aa                                                               |          |
| 2558670108 | DRAFT_00776 | GC             |                                                                     | 0.64     |
| 2558670109 | DRAFT_00777 | Metacyc        | PWY-6610: adenine and adenosine salvage IV                          |          |
| 2558670109 | DRAFT_00777 | Metacyc        | PWY-6605: adenine and adenosine salvage II                          |          |
| 2558670109 | DRAFT_00777 | Metacyc        | P121-PWY: adenine and adenosine salvage I                           |          |
| 2558670109 | DRAFT_00777 | COG_category   | [F] Nucleotide transport and metabolism                             |          |
| 2558670109 | DRAFT_00777 | COG0503        | Adenine/guanine phosphoribosyltransferases and related PRPP-binding | 6.00E-20 |
| 2558670109 | DRAFT_00777 | pfam00156      | Pribosyltran                                                        | 2.30E-16 |
| 2558670109 | DRAFT_00777 | EC:2.4.2.7     | Adenine phosphoribosyltransferase.                                  |          |
| 2558670109 | DRAFT_00777 | KO:K00759      | adenine phosphoribosyltransferase [EC:2.4.2.7]                      | 8.50E-40 |
| 2558670109 | DRAFT_00777 | Locus_type     | CDS                                                                 |          |
| 2558670109 | DRAFT_00777 | Product_name   | Adenine/guanine phosphoribosyltransferases and related PRPP-binding |          |
| 2558670109 | DRAFT_00777 | Scaffold       | DRAFT_contig_70_77_len_39784_read_count_688219.11                   |          |
| 2558670109 | DRAFT_00777 | Coordinates    | 35131..35871(-)                                                     |          |
| 2558670109 | DRAFT_00777 | DNA_length     | 741bp                                                               |          |
| 2558670109 | DRAFT_00777 | Protein_length | 246aa                                                               |          |
| 2558670109 | DRAFT_00777 | GC             |                                                                     | 0.6      |
| 2558670110 | DRAFT_00778 | Locus_type     | CDS                                                                 |          |
| 2558670110 | DRAFT_00778 | Product_name   | hypothetical protein                                                |          |
| 2558670110 | DRAFT_00778 | Scaffold       | DRAFT_contig_70_77_len_39784_read_count_688219.11                   |          |
| 2558670110 | DRAFT_00778 | Coordinates    | 35942..36139(-)                                                     |          |

|            |             |                |                                                       |           |
|------------|-------------|----------------|-------------------------------------------------------|-----------|
| 2558670110 | DRAFT_00778 | DNA_length     | 198bp                                                 |           |
| 2558670110 | DRAFT_00778 | Protein_length | 65aa                                                  |           |
| 2558670110 | DRAFT_00778 | GC             |                                                       | 0.66      |
| 2558670110 | DRAFT_00778 | Transmembrane  | Yes                                                   |           |
| 2558670111 | DRAFT_00779 | Metacyc        | PWY-6700: queuosine biosynthesis                      |           |
| 2558670111 | DRAFT_00779 | COG_category   | [J] Translation, ribosomal structure and biogenesis   |           |
| 2558670111 | DRAFT_00779 | COG0343        | Queuine/archaeosine tRNA-ribosyltransferase           | 1.00E-76  |
| 2558670111 | DRAFT_00779 | pfam01702      | TGT                                                   | 5.80E-44  |
| 2558670111 | DRAFT_00779 | EC:2.4.2.29    | tRNA-guanine(34) transglycosylase.                    |           |
| 2558670111 | DRAFT_00779 | TIGR00449      | tRNA-guanine family transglycosylase                  | 2.50E-70  |
| 2558670111 | DRAFT_00779 | TIGR00432      | tRNA-guanine transglycosylase, archaeosine-15-forming | 6.20E-116 |
| 2558670111 | DRAFT_00779 | KO:K00773      | queuine tRNA-ribosyltransferase [EC:2.4.2.29]         | 0.00E+00  |
| 2558670111 | DRAFT_00779 | Locus_type     | CDS                                                   |           |
| 2558670111 | DRAFT_00779 | Product_name   | tRNA-guanine family transglycosylase                  |           |
| 2558670111 | DRAFT_00779 | Scaffold       | DRAFT_contig_70_77_len_39784_read_count_688219.11     |           |
| 2558670111 | DRAFT_00779 | Coordinates    | 36189..37733(+)                                       |           |
| 2558670111 | DRAFT_00779 | DNA_length     | 1545bp                                                |           |
| 2558670111 | DRAFT_00779 | Protein_length | 514aa                                                 |           |
| 2558670111 | DRAFT_00779 | GC             |                                                       | 0.59      |
| 2558670112 | DRAFT_00780 | COG_category   | [R] General function prediction only                  |           |
| 2558670112 | DRAFT_00780 | COG1938        | Archaeal enzymes of ATP-grasp superfamily             | 1.00E-32  |
| 2558670112 | DRAFT_00780 | pfam09754      | PAC2                                                  | 9.50E-26  |
| 2558670112 | DRAFT_00780 | KO:K06869      | uncharacterized protein                               | 3.30E-25  |
| 2558670112 | DRAFT_00780 | Locus_type     | CDS                                                   |           |
| 2558670112 | DRAFT_00780 | Product_name   | Archaeal enzymes of ATP-grasp superfamily             |           |
| 2558670112 | DRAFT_00780 | Scaffold       | DRAFT_contig_70_77_len_39784_read_count_688219.11     |           |
| 2558670112 | DRAFT_00780 | Coordinates    | 37651..38352(-)                                       |           |
| 2558670112 | DRAFT_00780 | DNA_length     | 702bp                                                 |           |
| 2558670112 | DRAFT_00780 | Protein_length | 233aa                                                 |           |
| 2558670112 | DRAFT_00780 | GC             |                                                       | 0.61      |
| 2558670113 | DRAFT_00781 | COG_category   | [L] Replication, recombination and repair             |           |



|            |             |                |                                                   |          |
|------------|-------------|----------------|---------------------------------------------------|----------|
| 2558670113 | DRAFT_00781 | COG3316        | Transposase and inactivated derivatives           | 4.00E-15 |
| 2558670113 | DRAFT_00781 | pfam13610      | DDE_Tnp_IS240                                     | 1.10E-22 |
| 2558670113 | DRAFT_00781 | Locus_type     | CDS                                               |          |
| 2558670113 | DRAFT_00781 | Product_name   | Transposase and inactivated derivatives           |          |
| 2558670113 | DRAFT_00781 | Scaffold       | DRAFT_contig_70_77_len_39784_read_count_688219.11 |          |
| 2558670113 | DRAFT_00781 | Coordinates    | 38745..39698(+)                                   |          |
| 2558670113 | DRAFT_00781 | DNA_length     | 954bp                                             |          |
| 2558670113 | DRAFT_00781 | Protein_length | 317aa                                             |          |
| 2558670113 | DRAFT_00781 | GC             |                                                   | 0.52     |
| 2558670114 | DRAFT_00782 | Locus_type     | CDS                                               |          |
| 2558670114 | DRAFT_00782 | Product_name   | hypothetical protein                              |          |
| 2558670114 | DRAFT_00782 | Scaffold       | DRAFT_contig_70_78_len_38919_read_count_721921.12 |          |
| 2558670114 | DRAFT_00782 | Coordinates    | 1..228(+)                                         |          |
| 2558670114 | DRAFT_00782 | DNA_length     | 228bp                                             |          |
| 2558670114 | DRAFT_00782 | Protein_length | 75aa                                              |          |
| 2558670114 | DRAFT_00782 | GC             |                                                   | 0.5      |
| 2558670115 | DRAFT_00783 | Locus_type     | CDS                                               |          |
| 2558670115 | DRAFT_00783 | Product_name   | hypothetical protein                              |          |
| 2558670115 | DRAFT_00783 | Scaffold       | DRAFT_contig_70_78_len_38919_read_count_721921.12 |          |
| 2558670115 | DRAFT_00783 | Coordinates    | 347..1213(-)                                      |          |
| 2558670115 | DRAFT_00783 | DNA_length     | 867bp                                             |          |
| 2558670115 | DRAFT_00783 | Protein_length | 288aa                                             |          |
| 2558670115 | DRAFT_00783 | GC             |                                                   | 0.53     |
| 2558670115 | DRAFT_00783 | Transmembrane  | Yes                                               |          |
| 2558670116 | DRAFT_00784 | Locus_type     | CDS                                               |          |
| 2558670116 | DRAFT_00784 | Product_name   | hypothetical protein                              |          |
| 2558670116 | DRAFT_00784 | Scaffold       | DRAFT_contig_70_78_len_38919_read_count_721921.12 |          |
| 2558670116 | DRAFT_00784 | Coordinates    | 1613..1957(-)                                     |          |
| 2558670116 | DRAFT_00784 | DNA_length     | 345bp                                             |          |
| 2558670116 | DRAFT_00784 | Protein_length | 114aa                                             |          |
| 2558670116 | DRAFT_00784 | GC             |                                                   | 0.46     |

|            |             |                |                                     |                                                   |          |
|------------|-------------|----------------|-------------------------------------|---------------------------------------------------|----------|
| 2558670117 | DRAFT_00785 | pfam00583      | Acetyltransf_1                      |                                                   | 2.80E-08 |
| 2558670117 | DRAFT_00785 | Locus_type     |                                     | CDS                                               |          |
| 2558670117 | DRAFT_00785 | Product_name   |                                     | Acetyltransferases                                |          |
| 2558670117 | DRAFT_00785 | Scaffold       |                                     | DRAFT_contig_70_78_len_38919_read_count_721921.12 |          |
| 2558670117 | DRAFT_00785 | Coordinates    |                                     | 2403..2834(+)                                     |          |
| 2558670117 | DRAFT_00785 | DNA_length     |                                     | 432bp                                             |          |
| 2558670117 | DRAFT_00785 | Protein_length |                                     | 143aa                                             |          |
| 2558670117 | DRAFT_00785 | GC             |                                     |                                                   | 0.51     |
| 2558670118 | DRAFT_00786 | COG_category   | [S] Function unknown                |                                                   |          |
| 2558670118 | DRAFT_00786 | COG5616        | Predicted integral membrane protein |                                                   | 1.00E-38 |
| 2558670118 | DRAFT_00786 | pfam00211      | Guanylate_cyc                       |                                                   | 5.40E-20 |
| 2558670118 | DRAFT_00786 | EC:4.6.1.1     | Adenylate cyclase.                  |                                                   |          |
| 2558670118 | DRAFT_00786 | KO:K01768      | adenylate cyclase [EC:4.6.1.1]      |                                                   | 0.00E+00 |
| 2558670118 | DRAFT_00786 | Locus_type     |                                     | CDS                                               |          |
| 2558670118 | DRAFT_00786 | Product_name   |                                     | Predicted integral membrane protein               |          |
| 2558670118 | DRAFT_00786 | Scaffold       |                                     | DRAFT_contig_70_78_len_38919_read_count_721921.12 |          |
| 2558670118 | DRAFT_00786 | Coordinates    |                                     | 3076..5001(-)                                     |          |
| 2558670118 | DRAFT_00786 | DNA_length     |                                     | 1926bp                                            |          |
| 2558670118 | DRAFT_00786 | Protein_length |                                     | 641aa                                             |          |
| 2558670118 | DRAFT_00786 | GC             |                                     |                                                   | 0.57     |
| 2558670119 | DRAFT_00787 | Locus_type     |                                     | tRNA                                              |          |
| 2558670119 | DRAFT_00787 | Product_name   |                                     | tRNA_Asn_GTT                                      |          |
| 2558670119 | DRAFT_00787 | Scaffold       |                                     | DRAFT_contig_70_78_len_38919_read_count_721921.12 |          |
| 2558670119 | DRAFT_00787 | Coordinates    |                                     | 5229..5337(-)                                     |          |
| 2558670119 | DRAFT_00787 | DNA_length     |                                     | 82bp                                              |          |
| 2558670119 | DRAFT_00787 | GC             |                                     |                                                   | 0.63     |
| 2558670120 | DRAFT_00788 | Locus_type     |                                     | CDS                                               |          |
| 2558670120 | DRAFT_00788 | Product_name   |                                     | hypothetical protein                              |          |
| 2558670120 | DRAFT_00788 | Scaffold       |                                     | DRAFT_contig_70_78_len_38919_read_count_721921.12 |          |
| 2558670120 | DRAFT_00788 | Coordinates    |                                     | 5414..5662(+)                                     |          |

|            |             |                |                                                                   |          |
|------------|-------------|----------------|-------------------------------------------------------------------|----------|
| 2558670120 | DRAFT_00788 | DNA_length     | 249bp                                                             |          |
| 2558670120 | DRAFT_00788 | Protein_length | 82aa                                                              |          |
| 2558670120 | DRAFT_00788 | GC             |                                                                   | 0.59     |
| 2558670121 | DRAFT_00789 | COG_category   | [J] Translation, ribosomal structure and biogenesis               |          |
| 2558670121 | DRAFT_00789 | COG0023        | Translation initiation factor 1 (eIF-1/SUI1) and related proteins | 4.00E-16 |
| 2558670121 | DRAFT_00789 | pfam01253      | SUI1                                                              | 1.30E-19 |
| 2558670121 | DRAFT_00789 | TIGR01158      | translation initiation factor SUI1, putative, prokaryotic         | 4.40E-29 |
| 2558670121 | DRAFT_00789 | KO:K03113      | translation initiation factor 1                                   | 2.10E-18 |
| 2558670121 | DRAFT_00789 | Locus_type     | CDS                                                               |          |
| 2558670121 | DRAFT_00789 | Product_name   | Translation initiation factor 1 (eIF-1/SUI1) and related proteins |          |
| 2558670121 | DRAFT_00789 | Scaffold       | DRAFT_contig_70_78_len_38919_read_count_721921.12                 |          |
| 2558670121 | DRAFT_00789 | Coordinates    | 5948..6244(+)                                                     |          |
| 2558670121 | DRAFT_00789 | DNA_length     | 297bp                                                             |          |
| 2558670121 | DRAFT_00789 | Protein_length | 98aa                                                              |          |
| 2558670121 | DRAFT_00789 | GC             |                                                                   | 0.56     |
| 2558670122 | DRAFT_00790 | KEGG_module    | M00144: NADH:quinone oxidoreductase, prokaryotes                  |          |
| 2558670122 | DRAFT_00790 | Metacyc        | PWY0-1335: NADH to cytochrome <i>bo</i> oxidase electron transfer |          |
| 2558670122 | DRAFT_00790 | Metacyc        | PWY-4302: aerobic respiration (alternative oxidase pathway)       |          |
| 2558670122 | DRAFT_00790 | Metacyc        | PWY-6692: Fe(II) oxidation                                        |          |
| 2558670122 | DRAFT_00790 | Metacyc        | PWY-5083: NAD/NADH phosphorylation and dephosphorylation          |          |
| 2558670122 | DRAFT_00790 | Metacyc        | PWY-3781: aerobic respiration (cytochrome c)                      |          |
| 2558670122 | DRAFT_00790 | Metacyc        | PWY0-1334: NADH to cytochrome <i>bd</i> oxidase electron transfer |          |
| 2558670122 | DRAFT_00790 | COG_category   | [C] Energy production and conversion                              |          |
| 2558670122 | DRAFT_00790 | COG1005        | NADH:ubiquinone oxidoreductase subunit 1 (chain H)                | 7.00E-64 |
| 2558670122 | DRAFT_00790 | pfam00146      | NADHdh                                                            | 1.70E-78 |
| 2558670122 | DRAFT_00790 | EC:1.6.5.3     | NADH:ubiquinone reductase (H(+)-translocating).                   |          |
| 2558670122 | DRAFT_00790 | KO:K00337      | NADH-quinone oxidoreductase subunit H [EC:1.6.5.3]                | 0.00E+00 |
| 2558670122 | DRAFT_00790 | ITRM:05535     | NADH dehydrogenase subunit H (EC 1.6.5.3)                         |          |
| 2558670122 | DRAFT_00790 | Locus_type     | CDS                                                               |          |
| 2558670122 | DRAFT_00790 | Product_name   | NADH dehydrogenase subunit H (EC 1.6.5.3)                         |          |
| 2558670122 | DRAFT_00790 | Scaffold       | DRAFT_contig_70_78_len_38919_read_count_721921.12                 |          |
| 2558670122 | DRAFT_00790 | Coordinates    | 6336..7520(+)                                                     |          |

|            |             |                |                                                                   |          |
|------------|-------------|----------------|-------------------------------------------------------------------|----------|
| 2558670122 | DRAFT_00790 | DNA_length     | 1185bp                                                            |          |
| 2558670122 | DRAFT_00790 | Protein_length | 394aa                                                             |          |
| 2558670122 | DRAFT_00790 | GC             |                                                                   | 0.57     |
| 2558670122 | DRAFT_00790 | Transmembrane  | Yes                                                               |          |
| 2558670123 | DRAFT_00791 | KEGG_module    | M00144: NADH:quinone oxidoreductase, prokaryotes                  |          |
| 2558670123 | DRAFT_00791 | Metacyc        | PWY0-1335: NADH to cytochrome <i>bo</i> oxidase electron transfer |          |
| 2558670123 | DRAFT_00791 | Metacyc        | PWY-5083: NAD/NADH phosphorylation and dephosphorylation          |          |
| 2558670123 | DRAFT_00791 | Metacyc        | PWY-6692: Fe(II) oxidation                                        |          |
| 2558670123 | DRAFT_00791 | Metacyc        | PWY-4302: aerobic respiration (alternative oxidase pathway)       |          |
| 2558670123 | DRAFT_00791 | Metacyc        | PWY-3781: aerobic respiration (cytochrome c)                      |          |
| 2558670123 | DRAFT_00791 | Metacyc        | PWY0-1334: NADH to cytochrome <i>bd</i> oxidase electron transfer |          |
| 2558670123 | DRAFT_00791 | COG_category   | [C] Energy production and conversion                              |          |
| 2558670123 | DRAFT_00791 | COG1143        | Formate hydrogenlyase subunit 6/NADH:ubiquinone oxidoreductase 2: | 7.00E-28 |
| 2558670123 | DRAFT_00791 | pfam12838      | Fer4_7                                                            | 4.20E-10 |
| 2558670123 | DRAFT_00791 | EC:1.6.5.3     | NADH:ubiquinone reductase (H(+)-translocating).                   |          |
| 2558670123 | DRAFT_00791 | KO:K00338      | NADH-quinone oxidoreductase subunit I [EC:1.6.5.3]                | 0.00E+00 |
| 2558670123 | DRAFT_00791 | Locus_type     | CDS                                                               |          |
| 2558670123 | DRAFT_00791 | Product_name   | Formate hydrogenlyase subunit 6/NADH:ubiquinone oxidoreductase :  |          |
| 2558670123 | DRAFT_00791 | Scaffold       | DRAFT_contig_70_78_len_38919_read_count_721921.12                 |          |
| 2558670123 | DRAFT_00791 | Coordinates    | 7521..8036(+)                                                     |          |
| 2558670123 | DRAFT_00791 | DNA_length     | 516bp                                                             |          |
| 2558670123 | DRAFT_00791 | Protein_length | 171aa                                                             |          |
| 2558670123 | DRAFT_00791 | GC             |                                                                   | 0.57     |
| 2558670124 | DRAFT_00792 | KEGG_module    | M00144: NADH:quinone oxidoreductase, prokaryotes                  |          |
| 2558670124 | DRAFT_00792 | Metacyc        | PWY-6692: Fe(II) oxidation                                        |          |
| 2558670124 | DRAFT_00792 | Metacyc        | PWY0-1334: NADH to cytochrome <i>bd</i> oxidase electron transfer |          |
| 2558670124 | DRAFT_00792 | Metacyc        | PWY0-1335: NADH to cytochrome <i>bo</i> oxidase electron transfer |          |
| 2558670124 | DRAFT_00792 | Metacyc        | PWY-4302: aerobic respiration (alternative oxidase pathway)       |          |
| 2558670124 | DRAFT_00792 | Metacyc        | PWY-3781: aerobic respiration (cytochrome c)                      |          |
| 2558670124 | DRAFT_00792 | Metacyc        | PWY-5083: NAD/NADH phosphorylation and dephosphorylation          |          |
| 2558670124 | DRAFT_00792 | COG_category   | [C] Energy production and conversion                              |          |
| 2558670124 | DRAFT_00792 | COG0839        | NADH:ubiquinone oxidoreductase subunit 6 (chain J)                | 8.00E-10 |

|            |             |                |                                                                   |          |
|------------|-------------|----------------|-------------------------------------------------------------------|----------|
| 2558670124 | DRAFT_00792 | pfam00499      | Oxidored_q3                                                       | 6.60E-17 |
| 2558670124 | DRAFT_00792 | EC:1.6.5.3     | NADH:ubiquinone reductase (H(+)-translocating).                   |          |
| 2558670124 | DRAFT_00792 | KO:K00339      | NADH-quinone oxidoreductase subunit J [EC:1.6.5.3]                | 6.90E-33 |
| 2558670124 | DRAFT_00792 | Locus_type     | CDS                                                               |          |
| 2558670124 | DRAFT_00792 | Product_name   | NADH:ubiquinone oxidoreductase subunit 6 (chain J)                |          |
| 2558670124 | DRAFT_00792 | Scaffold       | DRAFT_contig_70_78_len_38919_read_count_721921.12                 |          |
| 2558670124 | DRAFT_00792 | Coordinates    | 8029..8535(+)                                                     |          |
| 2558670124 | DRAFT_00792 | DNA_length     | 507bp                                                             |          |
| 2558670124 | DRAFT_00792 | Protein_length | 168aa                                                             |          |
| 2558670124 | DRAFT_00792 | GC             |                                                                   | 0.59     |
| 2558670124 | DRAFT_00792 | Transmembrane  | Yes                                                               |          |
| 2558670125 | DRAFT_00793 | KEGG_module    | M00144: NADH:quinone oxidoreductase, prokaryotes                  |          |
| 2558670125 | DRAFT_00793 | Metacyc        | PWY-6692: Fe(II) oxidation                                        |          |
| 2558670125 | DRAFT_00793 | Metacyc        | PWY0-1334: NADH to cytochrome <i>bd</i> oxidase electron transfer |          |
| 2558670125 | DRAFT_00793 | Metacyc        | PWY-4302: aerobic respiration (alternative oxidase pathway)       |          |
| 2558670125 | DRAFT_00793 | Metacyc        | PWY-5083: NAD/NADH phosphorylation and dephosphorylation          |          |
| 2558670125 | DRAFT_00793 | Metacyc        | PWY-3781: aerobic respiration (cytochrome c)                      |          |
| 2558670125 | DRAFT_00793 | Metacyc        | PWY0-1335: NADH to cytochrome <i>bo</i> oxidase electron transfer |          |
| 2558670125 | DRAFT_00793 | COG_category   | [C] Energy production and conversion                              |          |
| 2558670125 | DRAFT_00793 | COG0713        | NADH:ubiquinone oxidoreductase subunit 11 or 4L (chain K)         | 1.00E-16 |
| 2558670125 | DRAFT_00793 | pfam00420      | Oxidored_q2                                                       | 1.40E-24 |
| 2558670125 | DRAFT_00793 | EC:1.6.5.3     | NADH:ubiquinone reductase (H(+)-translocating).                   |          |
| 2558670125 | DRAFT_00793 | KO:K00340      | NADH-quinone oxidoreductase subunit K [EC:1.6.5.3]                | 2.10E-23 |
| 2558670125 | DRAFT_00793 | Locus_type     | CDS                                                               |          |
| 2558670125 | DRAFT_00793 | Product_name   | NADH:ubiquinone oxidoreductase subunit 11 or 4L (chain K)         |          |
| 2558670125 | DRAFT_00793 | Scaffold       | DRAFT_contig_70_78_len_38919_read_count_721921.12                 |          |
| 2558670125 | DRAFT_00793 | Coordinates    | 8553..8837(+)                                                     |          |
| 2558670125 | DRAFT_00793 | DNA_length     | 285bp                                                             |          |
| 2558670125 | DRAFT_00793 | Protein_length | 94aa                                                              |          |
| 2558670125 | DRAFT_00793 | GC             |                                                                   | 0.51     |
| 2558670125 | DRAFT_00793 | Transmembrane  | Yes                                                               |          |
| 2558670126 | DRAFT_00794 | KEGG_module    | M00144: NADH:quinone oxidoreductase, prokaryotes                  |          |

|            |             |                |                                                                                 |           |
|------------|-------------|----------------|---------------------------------------------------------------------------------|-----------|
| 2558670126 | DRAFT_00794 | Metacyc        | PWY-6692: Fe(II) oxidation                                                      |           |
| 2558670126 | DRAFT_00794 | Metacyc        | PWY0-1335: NADH to cytochrome <i>bo</i> oxidase electron transfer               |           |
| 2558670126 | DRAFT_00794 | Metacyc        | PWY-3781: aerobic respiration (cytochrome c)                                    |           |
| 2558670126 | DRAFT_00794 | Metacyc        | PWY-5083: NAD/NADH phosphorylation and dephosphorylation                        |           |
| 2558670126 | DRAFT_00794 | Metacyc        | PWY0-1334: NADH to cytochrome <i>bd</i> oxidase electron transfer               |           |
| 2558670126 | DRAFT_00794 | Metacyc        | PWY-4302: aerobic respiration (alternative oxidase pathway)                     |           |
| 2558670126 | DRAFT_00794 | COG_category   | [C] Energy production and conversion                                            |           |
| 2558670126 | DRAFT_00794 | COG1008        | NADH:ubiquinone oxidoreductase subunit 4 (chain M)                              | 1.00E-57  |
| 2558670126 | DRAFT_00794 | pfam00361      | Oxidored_q1                                                                     | 7.60E-52  |
| 2558670126 | DRAFT_00794 | EC:1.6.5.3     | NADH:ubiquinone reductase (H(+)-translocating).                                 |           |
| 2558670126 | DRAFT_00794 | TIGR01972      | proton-translocating NADH-quinone oxidoreductase, chain M                       | 9.50E-79  |
| 2558670126 | DRAFT_00794 | KO:K00342      | NADH-quinone oxidoreductase subunit M [EC:1.6.5.3]                              | 0.00E+00  |
| 2558670126 | DRAFT_00794 | Locus_type     | CDS                                                                             |           |
| 2558670126 | DRAFT_00794 | Product_name   | NADH:ubiquinone oxidoreductase subunit 4 (chain M)                              |           |
| 2558670126 | DRAFT_00794 | Scaffold       | DRAFT_contig_70_78_len_38919_read_count_721921.12                               |           |
| 2558670126 | DRAFT_00794 | Coordinates    | 8915..10414(+)                                                                  |           |
| 2558670126 | DRAFT_00794 | DNA_length     | 1500bp                                                                          |           |
| 2558670126 | DRAFT_00794 | Protein_length | 499aa                                                                           |           |
| 2558670126 | DRAFT_00794 | GC             |                                                                                 | 0.55      |
| 2558670126 | DRAFT_00794 | Transmembrane  | Yes                                                                             |           |
| 2558670127 | DRAFT_00795 | KEGG_module    | M00144: NADH:quinone oxidoreductase, prokaryotes                                |           |
| 2558670127 | DRAFT_00795 | Metacyc        | PWY-5083: NAD/NADH phosphorylation and dephosphorylation                        |           |
| 2558670127 | DRAFT_00795 | Metacyc        | PWY-4302: aerobic respiration (alternative oxidase pathway)                     |           |
| 2558670127 | DRAFT_00795 | Metacyc        | PWY0-1334: NADH to cytochrome <i>bd</i> oxidase electron transfer               |           |
| 2558670127 | DRAFT_00795 | Metacyc        | PWY-6692: Fe(II) oxidation                                                      |           |
| 2558670127 | DRAFT_00795 | Metacyc        | PWY0-1335: NADH to cytochrome <i>bo</i> oxidase electron transfer               |           |
| 2558670127 | DRAFT_00795 | Metacyc        | PWY-3781: aerobic respiration (cytochrome c)                                    |           |
| 2558670127 | DRAFT_00795 | COG_category   | [C] Energy production and conversion                                            |           |
| 2558670127 | DRAFT_00795 | COG_category   | [P] Inorganic ion transport and metabolism                                      |           |
| 2558670127 | DRAFT_00795 | COG1009        | NADH:ubiquinone oxidoreductase subunit 5 (chain L)/Multisubunit Na <sup>+</sup> | 8.00E-107 |
| 2558670127 | DRAFT_00795 | pfam00361      | Oxidored_q1                                                                     | 6.70E-59  |
| 2558670127 | DRAFT_00795 | pfam00662      | Oxidored_q1_N                                                                   | 7.90E-09  |
| 2558670127 | DRAFT_00795 | EC:1.6.5.3     | NADH:ubiquinone reductase (H(+)-translocating).                                 |           |

|            |             |                |                                                                   |           |
|------------|-------------|----------------|-------------------------------------------------------------------|-----------|
| 2558670127 | DRAFT_00795 | TIGR01974      | proton-translocating NADH-quinone oxidoreductase, chain L         | 0.00E+00  |
| 2558670127 | DRAFT_00795 | KO:K00341      | NADH-quinone oxidoreductase subunit L [EC:1.6.5.3]                | 0.00E+00  |
| 2558670127 | DRAFT_00795 | Locus_type     | CDS                                                               |           |
| 2558670127 | DRAFT_00795 | Product_name   | proton-translocating NADH-quinone oxidoreductase, chain L         |           |
| 2558670127 | DRAFT_00795 | Scaffold       | DRAFT_contig_70_78_len_38919_read_count_721921.12                 |           |
| 2558670127 | DRAFT_00795 | Coordinates    | 10411..12588(+)                                                   |           |
| 2558670127 | DRAFT_00795 | DNA_length     | 2178bp                                                            |           |
| 2558670127 | DRAFT_00795 | Protein_length | 725aa                                                             |           |
| 2558670127 | DRAFT_00795 | GC             |                                                                   | 0.56      |
| 2558670127 | DRAFT_00795 | Transmembrane  | Yes                                                               |           |
| 2558670128 | DRAFT_00796 | KEGG_module    | M00144: NADH:quinone oxidoreductase, prokaryotes                  |           |
| 2558670128 | DRAFT_00796 | Metacyc        | PWY-6692: Fe(II) oxidation                                        |           |
| 2558670128 | DRAFT_00796 | Metacyc        | PWY0-1334: NADH to cytochrome <i>bd</i> oxidase electron transfer |           |
| 2558670128 | DRAFT_00796 | Metacyc        | PWY-4302: aerobic respiration (alternative oxidase pathway)       |           |
| 2558670128 | DRAFT_00796 | Metacyc        | PWY-3781: aerobic respiration (cytochrome c)                      |           |
| 2558670128 | DRAFT_00796 | Metacyc        | PWY-5083: NAD/NADH phosphorylation and dephosphorylation          |           |
| 2558670128 | DRAFT_00796 | Metacyc        | PWY0-1335: NADH to cytochrome <i>bo</i> oxidase electron transfer |           |
| 2558670128 | DRAFT_00796 | COG_category   | [C] Energy production and conversion                              |           |
| 2558670128 | DRAFT_00796 | COG1008        | NADH:ubiquinone oxidoreductase subunit 4 (chain M)                | 4.00E-102 |
| 2558670128 | DRAFT_00796 | pfam00361      | Oxidored_q1                                                       | 4.40E-66  |
| 2558670128 | DRAFT_00796 | EC:1.6.5.3     | NADH:ubiquinone reductase (H(+)-translocating).                   |           |
| 2558670128 | DRAFT_00796 | TIGR01972      | proton-translocating NADH-quinone oxidoreductase, chain M         | 0.00E+00  |
| 2558670128 | DRAFT_00796 | KO:K00342      | NADH-quinone oxidoreductase subunit M [EC:1.6.5.3]                | 0.00E+00  |
| 2558670128 | DRAFT_00796 | Locus_type     | CDS                                                               |           |
| 2558670128 | DRAFT_00796 | Product_name   | proton-translocating NADH-quinone oxidoreductase, chain M         |           |
| 2558670128 | DRAFT_00796 | Scaffold       | DRAFT_contig_70_78_len_38919_read_count_721921.12                 |           |
| 2558670128 | DRAFT_00796 | Coordinates    | 12585..14060(+)                                                   |           |
| 2558670128 | DRAFT_00796 | DNA_length     | 1476bp                                                            |           |
| 2558670128 | DRAFT_00796 | Protein_length | 491aa                                                             |           |
| 2558670128 | DRAFT_00796 | GC             |                                                                   | 0.56      |
| 2558670128 | DRAFT_00796 | Transmembrane  | Yes                                                               |           |
| 2558670129 | DRAFT_00797 | KEGG_module    | M00144: NADH:quinone oxidoreductase, prokaryotes                  |           |

|            |             |                |                                                                    |          |
|------------|-------------|----------------|--------------------------------------------------------------------|----------|
| 2558670129 | DRAFT_00797 | Metacyc        | PWY-5083: NAD/NADH phosphorylation and dephosphorylation           |          |
| 2558670129 | DRAFT_00797 | Metacyc        | PWY-6692: Fe(II) oxidation                                         |          |
| 2558670129 | DRAFT_00797 | Metacyc        | PWY0-1334: NADH to cytochrome <i>bd</i> oxidase electron transfer  |          |
| 2558670129 | DRAFT_00797 | Metacyc        | PWY0-1335: NADH to cytochrome <i>bo</i> oxidase electron transfer  |          |
| 2558670129 | DRAFT_00797 | Metacyc        | PWY-3781: aerobic respiration (cytochrome c)                       |          |
| 2558670129 | DRAFT_00797 | Metacyc        | PWY-4302: aerobic respiration (alternative oxidase pathway)        |          |
| 2558670129 | DRAFT_00797 | COG_category   | [C] Energy production and conversion                               |          |
| 2558670129 | DRAFT_00797 | COG1007        | NADH:ubiquinone oxidoreductase subunit 2 (chain N)                 | 7.00E-69 |
| 2558670129 | DRAFT_00797 | pfam00361      | Oxidored_q1                                                        | 9.00E-63 |
| 2558670129 | DRAFT_00797 | EC:1.6.5.3     | NADH:ubiquinone reductase (H(+)-translocating).                    |          |
| 2558670129 | DRAFT_00797 | TIGR01770      | proton-translocating NADH-quinone oxidoreductase, chain N          | 2.90E-96 |
| 2558670129 | DRAFT_00797 | KO:K00343      | NADH-quinone oxidoreductase subunit N [EC:1.6.5.3]                 | 0.00E+00 |
| 2558670129 | DRAFT_00797 | Locus_type     | CDS                                                                |          |
| 2558670129 | DRAFT_00797 | Product_name   | NADH:ubiquinone oxidoreductase subunit 2 (chain N)                 |          |
| 2558670129 | DRAFT_00797 | Scaffold       | DRAFT_contig_70_78_len_38919_read_count_721921.12                  |          |
| 2558670129 | DRAFT_00797 | Coordinates    | 14123..15520(+)                                                    |          |
| 2558670129 | DRAFT_00797 | DNA_length     | 1398bp                                                             |          |
| 2558670129 | DRAFT_00797 | Protein_length | 465aa                                                              |          |
| 2558670129 | DRAFT_00797 | GC             |                                                                    | 0.56     |
| 2558670129 | DRAFT_00797 | Transmembrane  | Yes                                                                |          |
| 2558670130 | DRAFT_00798 | KEGG_module    | M00159: V-type ATPase, prokaryotes                                 |          |
| 2558670130 | DRAFT_00798 | Metacyc        | PWY-6126: adenosine nucleotides <i>de novo</i> biosynthesis        |          |
| 2558670130 | DRAFT_00798 | COG_category   | [C] Energy production and conversion                               |          |
| 2558670130 | DRAFT_00798 | COG1269        | Archaeal/vacuolar-type H <sup>+</sup> -ATPase subunit I            | 2.00E-67 |
| 2558670130 | DRAFT_00798 | pfam01496      | V_ATPase_I                                                         | 2.80E-51 |
| 2558670130 | DRAFT_00798 | EC:3.6.3.14    | H(+)-transporting two-sector ATPase.                               |          |
| 2558670130 | DRAFT_00798 | KO:K02123      | V-type H <sup>+</sup> -transporting ATPase subunit I [EC:3.6.3.14] | 0.00E+00 |
| 2558670130 | DRAFT_00798 | Locus_type     | CDS                                                                |          |
| 2558670130 | DRAFT_00798 | Product_name   | Archaeal/vacuolar-type H <sup>+</sup> -ATPase subunit I            |          |
| 2558670130 | DRAFT_00798 | Scaffold       | DRAFT_contig_70_78_len_38919_read_count_721921.12                  |          |
| 2558670130 | DRAFT_00798 | Coordinates    | 15524..17569(-)                                                    |          |
| 2558670130 | DRAFT_00798 | DNA_length     | 2046bp                                                             |          |
| 2558670130 | DRAFT_00798 | Protein_length | 681aa                                                              |          |



|            |             |                |                                                                    |          |
|------------|-------------|----------------|--------------------------------------------------------------------|----------|
| 2558670130 | DRAFT_00798 | GC             |                                                                    | 0.55     |
| 2558670130 | DRAFT_00798 | Transmembrane  | Yes                                                                |          |
| 2558670131 | DRAFT_00799 | KEGG_module    | M00159: V-type ATPase, prokaryotes                                 |          |
| 2558670131 | DRAFT_00799 | Metacyc        | PWY-6126: adenosine nucleotides <i>de novo</i> biosynthesis        |          |
| 2558670131 | DRAFT_00799 | COG_category   | [C] Energy production and conversion                               |          |
| 2558670131 | DRAFT_00799 | COG1527        | Archaeal/vacuolar-type H <sup>+</sup> -ATPase subunit C            | 9.00E-21 |
| 2558670131 | DRAFT_00799 | pfam01992      | vATP-synt_AC39                                                     | 5.20E-24 |
| 2558670131 | DRAFT_00799 | EC:3.6.3.14    | H(+)-transporting two-sector ATPase.                               |          |
| 2558670131 | DRAFT_00799 | KO:K02119      | V-type H <sup>+</sup> -transporting ATPase subunit C [EC:3.6.3.14] | 0.00E+00 |
| 2558670131 | DRAFT_00799 | Locus_type     | CDS                                                                |          |
| 2558670131 | DRAFT_00799 | Product_name   | Archaeal/vacuolar-type H <sup>+</sup> -ATPase subunit C            |          |
| 2558670131 | DRAFT_00799 | Scaffold       | DRAFT_contig_70_78_len_38919_read_count_721921.12                  |          |
| 2558670131 | DRAFT_00799 | Coordinates    | 17692..18744(+)                                                    |          |
| 2558670131 | DRAFT_00799 | DNA_length     | 1053bp                                                             |          |
| 2558670131 | DRAFT_00799 | Protein_length | 350aa                                                              |          |
| 2558670131 | DRAFT_00799 | GC             |                                                                    | 0.55     |
| 2558670132 | DRAFT_00800 | Locus_type     | CDS                                                                |          |
| 2558670132 | DRAFT_00800 | Product_name   | hypothetical protein                                               |          |
| 2558670132 | DRAFT_00800 | Scaffold       | DRAFT_contig_70_78_len_38919_read_count_721921.12                  |          |
| 2558670132 | DRAFT_00800 | Coordinates    | 18859..19299(-)                                                    |          |
| 2558670132 | DRAFT_00800 | DNA_length     | 441bp                                                              |          |
| 2558670132 | DRAFT_00800 | Protein_length | 146aa                                                              |          |
| 2558670132 | DRAFT_00800 | GC             |                                                                    | 0.49     |
| 2558670133 | DRAFT_00801 | COG_category   | [L] Replication, recombination and repair                          |          |
| 2558670133 | DRAFT_00801 | COG3316        | Transposase and inactivated derivatives                            | 4.00E-11 |
| 2558670133 | DRAFT_00801 | pfam13610      | DDE_Tnp_IS240                                                      | 3.60E-22 |
| 2558670133 | DRAFT_00801 | Locus_type     | CDS                                                                |          |
| 2558670133 | DRAFT_00801 | Product_name   | Transposase and inactivated derivatives                            |          |
| 2558670133 | DRAFT_00801 | Scaffold       | DRAFT_contig_70_78_len_38919_read_count_721921.12                  |          |
| 2558670133 | DRAFT_00801 | Coordinates    | 19296..20429(-)                                                    |          |
| 2558670133 | DRAFT_00801 | DNA_length     | 1134bp                                                             |          |

|            |             |                |                                                                    |          |
|------------|-------------|----------------|--------------------------------------------------------------------|----------|
| 2558670133 | DRAFT_00801 | Protein_length | 377aa                                                              |          |
| 2558670133 | DRAFT_00801 | GC             |                                                                    | 0.53     |
| 2558670134 | DRAFT_00802 | Locus_type     | CDS                                                                |          |
| 2558670134 | DRAFT_00802 | Product_name   | hypothetical protein                                               |          |
| 2558670134 | DRAFT_00802 | Scaffold       | DRAFT_contig_70_78_len_38919_read_count_721921.12                  |          |
| 2558670134 | DRAFT_00802 | Coordinates    | 20645..20818(+)                                                    |          |
| 2558670134 | DRAFT_00802 | DNA_length     | 174bp                                                              |          |
| 2558670134 | DRAFT_00802 | Protein_length | 57aa                                                               |          |
| 2558670134 | DRAFT_00802 | GC             |                                                                    | 0.49     |
| 2558670135 | DRAFT_00803 | Locus_type     | CDS                                                                |          |
| 2558670135 | DRAFT_00803 | Product_name   | hypothetical protein                                               |          |
| 2558670135 | DRAFT_00803 | Scaffold       | DRAFT_contig_70_78_len_38919_read_count_721921.12                  |          |
| 2558670135 | DRAFT_00803 | Coordinates    | 20799..21353(+)                                                    |          |
| 2558670135 | DRAFT_00803 | DNA_length     | 555bp                                                              |          |
| 2558670135 | DRAFT_00803 | Protein_length | 184aa                                                              |          |
| 2558670135 | DRAFT_00803 | GC             |                                                                    | 0.5      |
| 2558670136 | DRAFT_00804 | Locus_type     | CDS                                                                |          |
| 2558670136 | DRAFT_00804 | Product_name   | hypothetical protein                                               |          |
| 2558670136 | DRAFT_00804 | Scaffold       | DRAFT_contig_70_78_len_38919_read_count_721921.12                  |          |
| 2558670136 | DRAFT_00804 | Coordinates    | 21350..21610(+)                                                    |          |
| 2558670136 | DRAFT_00804 | DNA_length     | 261bp                                                              |          |
| 2558670136 | DRAFT_00804 | Protein_length | 86aa                                                               |          |
| 2558670136 | DRAFT_00804 | GC             |                                                                    | 0.47     |
| 2558670137 | DRAFT_00805 | KEGG_module    | M00159: V-type ATPase, prokaryotes                                 |          |
| 2558670137 | DRAFT_00805 | Metacyc        | PWY-6126: adenosine nucleotides <i>de novo</i> biosynthesis        |          |
| 2558670137 | DRAFT_00805 | pfam00137      | ATP-synt_C                                                         | 2.90E-21 |
| 2558670137 | DRAFT_00805 | EC:3.6.3.14    | H(+)-transporting two-sector ATPase.                               |          |
| 2558670137 | DRAFT_00805 | KO:K02124      | V-type H <sup>+</sup> -transporting ATPase subunit K [EC:3.6.3.14] | 7.80E-16 |
| 2558670137 | DRAFT_00805 | Locus_type     | CDS                                                                |          |
| 2558670137 | DRAFT_00805 | Product_name   | ATP synthase subunit C                                             |          |

|            |             |                |                                                   |          |
|------------|-------------|----------------|---------------------------------------------------|----------|
| 2558670137 | DRAFT_00805 | Scaffold       | DRAFT_contig_70_78_len_38919_read_count_721921.12 |          |
| 2558670137 | DRAFT_00805 | Coordinates    | 21636..21962(+)                                   |          |
| 2558670137 | DRAFT_00805 | DNA_length     | 327bp                                             |          |
| 2558670137 | DRAFT_00805 | Protein_length | 108aa                                             |          |
| 2558670137 | DRAFT_00805 | GC             |                                                   | 0.54     |
| 2558670137 | DRAFT_00805 | Signal_peptide | Yes                                               |          |
| 2558670137 | DRAFT_00805 | Transmembrane  | Yes                                               |          |
| 2558670138 | DRAFT_00806 | Metacyc        | PWY-5783: octaprenyl diphosphate biosynthesis     |          |
| 2558670138 | DRAFT_00806 | COG_category   | [H] Coenzyme transport and metabolism             |          |
| 2558670138 | DRAFT_00806 | COG0142        | Geranylgeranyl pyrophosphate synthase             | 3.00E-41 |
| 2558670138 | DRAFT_00806 | pfam00348      | polyprenyl_synt                                   | 5.20E-43 |
| 2558670138 | DRAFT_00806 | EC:2.5.1.90    | All-trans-octaprenyl-diphosphate synthase.        |          |
| 2558670138 | DRAFT_00806 | KO:K02523      | octaprenyl-diphosphate synthase [EC:2.5.1.90]     | 0.00E+00 |
| 2558670138 | DRAFT_00806 | Locus_type     | CDS                                               |          |
| 2558670138 | DRAFT_00806 | Product_name   | Geranylgeranyl pyrophosphate synthase             |          |
| 2558670138 | DRAFT_00806 | Scaffold       | DRAFT_contig_70_78_len_38919_read_count_721921.12 |          |
| 2558670138 | DRAFT_00806 | Coordinates    | 22104..22961(-)                                   |          |
| 2558670138 | DRAFT_00806 | DNA_length     | 858bp                                             |          |
| 2558670138 | DRAFT_00806 | Protein_length | 285aa                                             |          |
| 2558670138 | DRAFT_00806 | GC             |                                                   | 0.55     |
| 2558670138 | DRAFT_00806 | Transmembrane  | Yes                                               |          |
| 2558670139 | DRAFT_00807 | Locus_type     | tRNA                                              |          |
| 2558670139 | DRAFT_00807 | Product_name   | tRNA_Pseudo_TTC                                   |          |
| 2558670139 | DRAFT_00807 | Scaffold       | DRAFT_contig_70_78_len_38919_read_count_721921.12 |          |
| 2558670139 | DRAFT_00807 | Coordinates    | 23327..23398(+)                                   |          |
| 2558670139 | DRAFT_00807 | DNA_length     | 72bp                                              |          |
| 2558670139 | DRAFT_00807 | GC             |                                                   | 0.67     |
| 2558670140 | DRAFT_00808 | Locus_type     | CDS                                               |          |
| 2558670140 | DRAFT_00808 | Product_name   | hypothetical protein                              |          |
| 2558670140 | DRAFT_00808 | Scaffold       | DRAFT_contig_70_78_len_38919_read_count_721921.12 |          |
| 2558670140 | DRAFT_00808 | Coordinates    | 23454..24824(+)                                   |          |

|            |             |                |         |                                                   |          |
|------------|-------------|----------------|---------|---------------------------------------------------|----------|
| 2558670140 | DRAFT_00808 | DNA_length     |         | 1371bp                                            |          |
| 2558670140 | DRAFT_00808 | Protein_length |         | 456aa                                             |          |
| 2558670140 | DRAFT_00808 | GC             |         |                                                   | 0.56     |
| 2558670141 | DRAFT_00809 | Locus_type     |         | CDS                                               |          |
| 2558670141 | DRAFT_00809 | Product_name   |         | hypothetical protein                              |          |
| 2558670141 | DRAFT_00809 | Scaffold       |         | DRAFT_contig_70_78_len_38919_read_count_721921.12 |          |
| 2558670141 | DRAFT_00809 | Coordinates    |         | 25126..26250(+)                                   |          |
| 2558670141 | DRAFT_00809 | DNA_length     |         | 1125bp                                            |          |
| 2558670141 | DRAFT_00809 | Protein_length |         | 374aa                                             |          |
| 2558670141 | DRAFT_00809 | GC             |         |                                                   | 0.59     |
| 2558670141 | DRAFT_00809 | Signal_peptide |         | Yes                                               |          |
| 2558670142 | DRAFT_00810 | Locus_type     |         | CDS                                               |          |
| 2558670142 | DRAFT_00810 | Product_name   |         | hypothetical protein                              |          |
| 2558670142 | DRAFT_00810 | Scaffold       |         | DRAFT_contig_70_78_len_38919_read_count_721921.12 |          |
| 2558670142 | DRAFT_00810 | Coordinates    |         | 26367..26915(-)                                   |          |
| 2558670142 | DRAFT_00810 | DNA_length     |         | 549bp                                             |          |
| 2558670142 | DRAFT_00810 | Protein_length |         | 182aa                                             |          |
| 2558670142 | DRAFT_00810 | GC             |         |                                                   | 0.51     |
| 2558670142 | DRAFT_00810 | Transmembrane  |         | Yes                                               |          |
| 2558670143 | DRAFT_00811 | pfam00096      | zf-C2H2 |                                                   | 3.10E-04 |
| 2558670143 | DRAFT_00811 | Locus_type     |         | CDS                                               |          |
| 2558670143 | DRAFT_00811 | Product_name   |         | Zinc finger, C2H2 type                            |          |
| 2558670143 | DRAFT_00811 | Scaffold       |         | DRAFT_contig_70_78_len_38919_read_count_721921.12 |          |
| 2558670143 | DRAFT_00811 | Coordinates    |         | 26992..27480(+)                                   |          |
| 2558670143 | DRAFT_00811 | DNA_length     |         | 489bp                                             |          |
| 2558670143 | DRAFT_00811 | Protein_length |         | 162aa                                             |          |
| 2558670143 | DRAFT_00811 | GC             |         |                                                   | 0.52     |
| 2558670143 | DRAFT_00811 | Transmembrane  |         | Yes                                               |          |
| 2558670144 | DRAFT_00812 | Locus_type     |         | CDS                                               |          |
| 2558670144 | DRAFT_00812 | Product_name   |         | hypothetical protein                              |          |

|            |             |                |       |                                                   |
|------------|-------------|----------------|-------|---------------------------------------------------|
| 2558670144 | DRAFT_00812 | Scaffold       |       | DRAFT_contig_70_78_len_38919_read_count_721921.12 |
| 2558670144 | DRAFT_00812 | Coordinates    |       | 28067..30187(+)                                   |
| 2558670144 | DRAFT_00812 | DNA_length     |       | 2121bp                                            |
| 2558670144 | DRAFT_00812 | Protein_length |       | 706aa                                             |
| 2558670144 | DRAFT_00812 | GC             |       | 0.56                                              |
| 2558670144 | DRAFT_00812 | Signal_peptide |       | Yes                                               |
| 2558670144 | DRAFT_00812 | Transmembrane  |       | Yes                                               |
|            |             |                |       |                                                   |
| 2558670145 | DRAFT_00813 | pfam13392      | HNH_3 | 9.60E-08                                          |
| 2558670145 | DRAFT_00813 | Locus_type     |       | CDS                                               |
| 2558670145 | DRAFT_00813 | Product_name   |       | HNH endonuclease                                  |
| 2558670145 | DRAFT_00813 | Scaffold       |       | DRAFT_contig_70_78_len_38919_read_count_721921.12 |
| 2558670145 | DRAFT_00813 | Coordinates    |       | 30376..30954(-)                                   |
| 2558670145 | DRAFT_00813 | DNA_length     |       | 579bp                                             |
| 2558670145 | DRAFT_00813 | Protein_length |       | 192aa                                             |
| 2558670145 | DRAFT_00813 | GC             |       | 0.58                                              |
|            |             |                |       |                                                   |
| 2558670146 | DRAFT_00814 | Locus_type     |       | CDS                                               |
| 2558670146 | DRAFT_00814 | Product_name   |       | hypothetical protein                              |
| 2558670146 | DRAFT_00814 | Scaffold       |       | DRAFT_contig_70_78_len_38919_read_count_721921.12 |
| 2558670146 | DRAFT_00814 | Coordinates    |       | 31056..31250(-)                                   |
| 2558670146 | DRAFT_00814 | DNA_length     |       | 195bp                                             |
| 2558670146 | DRAFT_00814 | Protein_length |       | 64aa                                              |
| 2558670146 | DRAFT_00814 | GC             |       | 0.52                                              |
|            |             |                |       |                                                   |
| 2558670147 | DRAFT_00815 | Locus_type     |       | CDS                                               |
| 2558670147 | DRAFT_00815 | Product_name   |       | hypothetical protein                              |
| 2558670147 | DRAFT_00815 | Scaffold       |       | DRAFT_contig_70_78_len_38919_read_count_721921.12 |
| 2558670147 | DRAFT_00815 | Coordinates    |       | 31325..32203(+)                                   |
| 2558670147 | DRAFT_00815 | DNA_length     |       | 879bp                                             |
| 2558670147 | DRAFT_00815 | Protein_length |       | 292aa                                             |
| 2558670147 | DRAFT_00815 | GC             |       | 0.56                                              |
|            |             |                |       |                                                   |
| 2558670148 | DRAFT_00816 | Locus_type     |       | CDS                                               |

|            |             |                |                                                   |          |
|------------|-------------|----------------|---------------------------------------------------|----------|
| 2558670148 | DRAFT_00816 | Product_name   | hypothetical protein                              |          |
| 2558670148 | DRAFT_00816 | Scaffold       | DRAFT_contig_70_78_len_38919_read_count_721921.12 |          |
| 2558670148 | DRAFT_00816 | Coordinates    | 32811..33320(-)                                   |          |
| 2558670148 | DRAFT_00816 | DNA_length     | 510bp                                             |          |
| 2558670148 | DRAFT_00816 | Protein_length | 169aa                                             |          |
| 2558670148 | DRAFT_00816 | GC             |                                                   | 0.5      |
| 2558670149 | DRAFT_00817 | pfam00149      | Metallophos                                       | 2.10E-06 |
| 2558670149 | DRAFT_00817 | Locus_type     | CDS                                               |          |
| 2558670149 | DRAFT_00817 | Product_name   | Calcineurin-like phosphoesterase                  |          |
| 2558670149 | DRAFT_00817 | Scaffold       | DRAFT_contig_70_78_len_38919_read_count_721921.12 |          |
| 2558670149 | DRAFT_00817 | Coordinates    | 33464..38476(+)                                   |          |
| 2558670149 | DRAFT_00817 | DNA_length     | 5013bp                                            |          |
| 2558670149 | DRAFT_00817 | Protein_length | 1670aa                                            |          |
| 2558670149 | DRAFT_00817 | GC             |                                                   | 0.55     |
| 2558670149 | DRAFT_00817 | Transmembrane  | Yes                                               |          |
| 2558670150 | DRAFT_00818 | pfam13240      | zinc_ribbon_2                                     | 6.80E-08 |
| 2558670150 | DRAFT_00818 | Locus_type     | CDS                                               |          |
| 2558670150 | DRAFT_00818 | Product_name   | Predicted ferric reductase                        |          |
| 2558670150 | DRAFT_00818 | Scaffold       | DRAFT_contig_70_80_len_38341_read_count_650701.13 |          |
| 2558670150 | DRAFT_00818 | Coordinates    | 2..526(+)                                         |          |
| 2558670150 | DRAFT_00818 | DNA_length     | 525bp                                             |          |
| 2558670150 | DRAFT_00818 | Protein_length | 174aa                                             |          |
| 2558670150 | DRAFT_00818 | GC             |                                                   | 0.55     |
| 2558670150 | DRAFT_00818 | Transmembrane  | Yes                                               |          |
| 2558670151 | DRAFT_00819 | pfam01243      | Pyridox_oxidase                                   | 3.90E-13 |
| 2558670151 | DRAFT_00819 | TIGR03618      | PPOX class probable F420-dependent enzyme         | 9.30E-31 |
| 2558670151 | DRAFT_00819 | Locus_type     | CDS                                               |          |
| 2558670151 | DRAFT_00819 | Product_name   | PPOX class probable F420-dependent enzyme         |          |
| 2558670151 | DRAFT_00819 | Scaffold       | DRAFT_contig_70_80_len_38341_read_count_650701.13 |          |
| 2558670151 | DRAFT_00819 | Coordinates    | 603..992(-)                                       |          |
| 2558670151 | DRAFT_00819 | DNA_length     | 390bp                                             |          |

|            |             |                |                                                   |          |
|------------|-------------|----------------|---------------------------------------------------|----------|
| 2558670151 | DRAFT_00819 | Protein_length | 129aa                                             |          |
| 2558670151 | DRAFT_00819 | GC             |                                                   | 0.5      |
| 2558670152 | DRAFT_00820 | COG_category   | [S] Function unknown                              |          |
| 2558670152 | DRAFT_00820 | COG4280        | Predicted membrane protein                        | 2.00E-20 |
| 2558670152 | DRAFT_00820 | Locus_type     | CDS                                               |          |
| 2558670152 | DRAFT_00820 | Product_name   | Predicted membrane protein                        |          |
| 2558670152 | DRAFT_00820 | Scaffold       | DRAFT_contig_70_80_len_38341_read_count_650701.13 |          |
| 2558670152 | DRAFT_00820 | Coordinates    | 1101..1781(+)                                     |          |
| 2558670152 | DRAFT_00820 | DNA_length     | 681bp                                             |          |
| 2558670152 | DRAFT_00820 | Protein_length | 226aa                                             |          |
| 2558670152 | DRAFT_00820 | GC             |                                                   | 0.5      |
| 2558670152 | DRAFT_00820 | Transmembrane  | Yes                                               |          |
| 2558670153 | DRAFT_00821 | Locus_type     | CDS                                               |          |
| 2558670153 | DRAFT_00821 | Product_name   | hypothetical protein                              |          |
| 2558670153 | DRAFT_00821 | Scaffold       | DRAFT_contig_70_80_len_38341_read_count_650701.13 |          |
| 2558670153 | DRAFT_00821 | Coordinates    | 1798..1965(+)                                     |          |
| 2558670153 | DRAFT_00821 | DNA_length     | 168bp                                             |          |
| 2558670153 | DRAFT_00821 | Protein_length | 55aa                                              |          |
| 2558670153 | DRAFT_00821 | GC             |                                                   | 0.51     |
| 2558670154 | DRAFT_00822 | pfam07690      | MFS_1                                             | 7.10E-16 |
| 2558670154 | DRAFT_00822 | Locus_type     | CDS                                               |          |
| 2558670154 | DRAFT_00822 | Product_name   | Major Facilitator Superfamily                     |          |
| 2558670154 | DRAFT_00822 | Scaffold       | DRAFT_contig_70_80_len_38341_read_count_650701.13 |          |
| 2558670154 | DRAFT_00822 | Coordinates    | 1987..3291(+)                                     |          |
| 2558670154 | DRAFT_00822 | DNA_length     | 1305bp                                            |          |
| 2558670154 | DRAFT_00822 | Protein_length | 434aa                                             |          |
| 2558670154 | DRAFT_00822 | GC             |                                                   | 0.55     |
| 2558670154 | DRAFT_00822 | Transmembrane  | Yes                                               |          |
| 2558670155 | DRAFT_00823 | COG_category   | [S] Function unknown                              |          |
| 2558670155 | DRAFT_00823 | COG4095        | Uncharacterized conserved protein                 | 7.00E-08 |

|            |             |                |                                                                     |          |
|------------|-------------|----------------|---------------------------------------------------------------------|----------|
| 2558670155 | DRAFT_00823 | pfam04193      | PQ-loop                                                             | 2.00E-09 |
| 2558670155 | DRAFT_00823 | KO:K15383      | MtN3 and saliva related transmembrane protein                       | 8.70E-14 |
| 2558670155 | DRAFT_00823 | Locus_type     | CDS                                                                 |          |
| 2558670155 | DRAFT_00823 | Product_name   | Uncharacterized conserved protein                                   |          |
| 2558670155 | DRAFT_00823 | Scaffold       | DRAFT_contig_70_80_len_38341_read_count_650701.13                   |          |
| 2558670155 | DRAFT_00823 | Coordinates    | 3440..3718(+)                                                       |          |
| 2558670155 | DRAFT_00823 | DNA_length     | 279bp                                                               |          |
| 2558670155 | DRAFT_00823 | Protein_length | 92aa                                                                |          |
| 2558670155 | DRAFT_00823 | GC             |                                                                     | 0.5      |
| 2558670155 | DRAFT_00823 | Transmembrane  | Yes                                                                 |          |
| 2558670156 | DRAFT_00824 | COG_category   | [J] Translation, ribosomal structure and biogenesis                 |          |
| 2558670156 | DRAFT_00824 | COG5257        | Translation initiation factor 2, gamma subunit (eIF-2gamma; GTPase) | 0.00E+00 |
| 2558670156 | DRAFT_00824 | pfam00009      | GTP_EFTU                                                            | 3.60E-42 |
| 2558670156 | DRAFT_00824 | pfam03144      | GTP_EFTU_D2                                                         | 4.90E-06 |
| 2558670156 | DRAFT_00824 | pfam09173      | eIF2_C                                                              | 1.50E-23 |
| 2558670156 | DRAFT_00824 | TIGR00231      | small GTP-binding protein domain                                    | 2.60E-17 |
| 2558670156 | DRAFT_00824 | TIGR03680      | translation initiation factor 2 subunit gamma                       | 0.00E+00 |
| 2558670156 | DRAFT_00824 | KO:K03242      | translation initiation factor 2 subunit 3                           | 0.00E+00 |
| 2558670156 | DRAFT_00824 | ITERM:02577    | translation initiation factor 2 subunit gamma (aeIF-2g)             |          |
| 2558670156 | DRAFT_00824 | Locus_type     | CDS                                                                 |          |
| 2558670156 | DRAFT_00824 | Product_name   | translation initiation factor 2 subunit gamma (aeIF-2g)             |          |
| 2558670156 | DRAFT_00824 | Scaffold       | DRAFT_contig_70_80_len_38341_read_count_650701.13                   |          |
| 2558670156 | DRAFT_00824 | Coordinates    | 3903..5165(+)                                                       |          |
| 2558670156 | DRAFT_00824 | DNA_length     | 1263bp                                                              |          |
| 2558670156 | DRAFT_00824 | Protein_length | 420aa                                                               |          |
| 2558670156 | DRAFT_00824 | GC             |                                                                     | 0.62     |
| 2558670157 | DRAFT_00825 | COG_category   | [R] General function prediction only                                |          |
| 2558670157 | DRAFT_00825 | COG1412        | Uncharacterized proteins of PiIT N-term./Vapc superfamily           | 2.00E-07 |
| 2558670157 | DRAFT_00825 | Locus_type     | CDS                                                                 |          |
| 2558670157 | DRAFT_00825 | Product_name   | Uncharacterized proteins of PiIT N-term./Vapc superfamily           |          |
| 2558670157 | DRAFT_00825 | Scaffold       | DRAFT_contig_70_80_len_38341_read_count_650701.13                   |          |
| 2558670157 | DRAFT_00825 | Coordinates    | 5169..5537(+)                                                       |          |



|            |             |                |                                                                  |          |
|------------|-------------|----------------|------------------------------------------------------------------|----------|
| 2558670157 | DRAFT_00825 | DNA_length     | 369bp                                                            |          |
| 2558670157 | DRAFT_00825 | Protein_length | 122aa                                                            |          |
| 2558670157 | DRAFT_00825 | GC             |                                                                  | 0.6      |
| 2558670158 | DRAFT_00826 | KEGG_module    | M00115: NAD biosynthesis, aspartate => NAD                       |          |
| 2558670158 | DRAFT_00826 | Metacyc        | PYRIDNUCSYN-PWY: NAD biosynthesis I (from aspartate)             |          |
| 2558670158 | DRAFT_00826 | COG_category   | [H] Coenzyme transport and metabolism                            |          |
| 2558670158 | DRAFT_00826 | COG0171        | NAD synthase                                                     | 3.00E-68 |
| 2558670158 | DRAFT_00826 | pfam02540      | NAD_synthase                                                     | 2.30E-71 |
| 2558670158 | DRAFT_00826 | EC:6.3.1.5     | NAD(+) synthase.                                                 |          |
| 2558670158 | DRAFT_00826 | TIGR00552      | NAD+ synthetase                                                  | 1.40E-69 |
| 2558670158 | DRAFT_00826 | KO:K01916      | NAD+ synthase [EC:6.3.1.5]                                       | 0.00E+00 |
| 2558670158 | DRAFT_00826 | Locus_type     | CDS                                                              |          |
| 2558670158 | DRAFT_00826 | Product_name   | NH(3)-dependent NAD(+) synthetase (EC 6.3.1.5)                   |          |
| 2558670158 | DRAFT_00826 | Scaffold       | DRAFT_contig_70_80_len_38341_read_count_650701.13                |          |
| 2558670158 | DRAFT_00826 | Coordinates    | 5584..6375(+)                                                    |          |
| 2558670158 | DRAFT_00826 | DNA_length     | 792bp                                                            |          |
| 2558670158 | DRAFT_00826 | Protein_length | 263aa                                                            |          |
| 2558670158 | DRAFT_00826 | GC             |                                                                  | 0.61     |
| 2558670159 | DRAFT_00827 | KEGG_module    | M00184: RNA polymerase, archaea                                  |          |
| 2558670159 | DRAFT_00827 | COG_category   | [K] Transcription                                                |          |
| 2558670159 | DRAFT_00827 | COG1095        | DNA-directed RNA polymerase, subunit E'                          | 1.00E-48 |
| 2558670159 | DRAFT_00827 | pfam00575      | S1                                                               | 5.50E-14 |
| 2558670159 | DRAFT_00827 | pfam03876      | SHS2_Rpb7-N                                                      | 6.90E-16 |
| 2558670159 | DRAFT_00827 | EC:2.7.7.6     | DNA-directed RNA polymerase.                                     |          |
| 2558670159 | DRAFT_00827 | TIGR00448      | DNA-directed RNA polymerase (rpoE), archaeal and eukaryotic form | 7.30E-61 |
| 2558670159 | DRAFT_00827 | KO:K03049      | DNA-directed RNA polymerase subunit E' [EC:2.7.7.6]              | 0.00E+00 |
| 2558670159 | DRAFT_00827 | Locus_type     | CDS                                                              |          |
| 2558670159 | DRAFT_00827 | Product_name   | DNA-directed RNA polymerase (rpoE), archaeal and eukaryotic form |          |
| 2558670159 | DRAFT_00827 | Scaffold       | DRAFT_contig_70_80_len_38341_read_count_650701.13                |          |
| 2558670159 | DRAFT_00827 | Coordinates    | 6443..7027(+)                                                    |          |
| 2558670159 | DRAFT_00827 | DNA_length     | 585bp                                                            |          |
| 2558670159 | DRAFT_00827 | Protein_length | 194aa                                                            |          |

|            |             |                |                                                       |          |
|------------|-------------|----------------|-------------------------------------------------------|----------|
| 2558670159 | DRAFT_00827 | GC             |                                                       | 0.56     |
| 2558670160 | DRAFT_00828 | KEGG_module    | M00184: RNA polymerase, archaea                       |          |
| 2558670160 | DRAFT_00828 | COG_category   | [K] Transcription                                     |          |
| 2558670160 | DRAFT_00828 | COG2093        | DNA-directed RNA polymerase, subunit E''              | 1.00E-15 |
| 2558670160 | DRAFT_00828 | pfam06093      | Spt4                                                  | 9.00E-14 |
| 2558670160 | DRAFT_00828 | EC:2.7.7.6     | DNA-directed RNA polymerase.                          |          |
| 2558670160 | DRAFT_00828 | KO:K03050      | DNA-directed RNA polymerase subunit E'' [EC:2.7.7.6]  | 2.60E-14 |
| 2558670160 | DRAFT_00828 | Locus_type     | CDS                                                   |          |
| 2558670160 | DRAFT_00828 | Product_name   | DNA-directed RNA polymerase, subunit E'' (EC 2.7.7.6) |          |
| 2558670160 | DRAFT_00828 | Scaffold       | DRAFT_contig_70_80_len_38341_read_count_650701.13     |          |
| 2558670160 | DRAFT_00828 | Coordinates    | 7039..7224(+)                                         |          |
| 2558670160 | DRAFT_00828 | DNA_length     | 186bp                                                 |          |
| 2558670160 | DRAFT_00828 | Protein_length | 61aa                                                  |          |
| 2558670160 | DRAFT_00828 | GC             |                                                       | 0.55     |
| 2558670161 | DRAFT_00829 | COG_category   | [S] Function unknown                                  |          |
| 2558670161 | DRAFT_00829 | COG1909        | Uncharacterized protein conserved in archaea          | 3.00E-32 |
| 2558670161 | DRAFT_00829 | pfam04019      | DUF359                                                | 1.20E-32 |
| 2558670161 | DRAFT_00829 | KO:K09735      | hypothetical protein                                  | 1.00E-26 |
| 2558670161 | DRAFT_00829 | Locus_type     | CDS                                                   |          |
| 2558670161 | DRAFT_00829 | Product_name   | Uncharacterized protein conserved in archaea          |          |
| 2558670161 | DRAFT_00829 | Scaffold       | DRAFT_contig_70_80_len_38341_read_count_650701.13     |          |
| 2558670161 | DRAFT_00829 | Coordinates    | 7229..7762(+)                                         |          |
| 2558670161 | DRAFT_00829 | DNA_length     | 534bp                                                 |          |
| 2558670161 | DRAFT_00829 | Protein_length | 177aa                                                 |          |
| 2558670161 | DRAFT_00829 | GC             |                                                       | 0.6      |
| 2558670162 | DRAFT_00830 | COG_category   | [J] Translation, ribosomal structure and biogenesis   |          |
| 2558670162 | DRAFT_00830 | COG2004        | Ribosomal protein S24E                                | 5.00E-05 |
| 2558670162 | DRAFT_00830 | pfam01282      | Ribosomal_S24e                                        | 5.80E-08 |
| 2558670162 | DRAFT_00830 | Locus_type     | CDS                                                   |          |
| 2558670162 | DRAFT_00830 | Product_name   | Ribosomal protein S24E                                |          |
| 2558670162 | DRAFT_00830 | Scaffold       | DRAFT_contig_70_80_len_38341_read_count_650701.13     |          |

|            |             |                |                                                     |          |
|------------|-------------|----------------|-----------------------------------------------------|----------|
| 2558670162 | DRAFT_00830 | Coordinates    | 7795..8139(+)                                       |          |
| 2558670162 | DRAFT_00830 | DNA_length     | 345bp                                               |          |
| 2558670162 | DRAFT_00830 | Protein_length | 114aa                                               |          |
| 2558670162 | DRAFT_00830 | GC             |                                                     | 0.59     |
| 2558670163 | DRAFT_00831 | COG_category   | [J] Translation, ribosomal structure and biogenesis |          |
| 2558670163 | DRAFT_00831 | COG1998        | Ribosomal protein S27AE                             | 1.00E-12 |
| 2558670163 | DRAFT_00831 | pfam01599      | Ribosomal_S27                                       | 2.50E-17 |
| 2558670163 | DRAFT_00831 | Locus_type     | CDS                                                 |          |
| 2558670163 | DRAFT_00831 | Product_name   | Ribosomal protein S27AE                             |          |
| 2558670163 | DRAFT_00831 | Scaffold       | DRAFT_contig_70_80_len_38341_read_count_650701.13   |          |
| 2558670163 | DRAFT_00831 | Coordinates    | 8142..8447(+)                                       |          |
| 2558670163 | DRAFT_00831 | DNA_length     | 306bp                                               |          |
| 2558670163 | DRAFT_00831 | Protein_length | 101aa                                               |          |
| 2558670163 | DRAFT_00831 | GC             |                                                     | 0.55     |
| 2558670164 | DRAFT_00832 | Locus_type     | CDS                                                 |          |
| 2558670164 | DRAFT_00832 | Product_name   | hypothetical protein                                |          |
| 2558670164 | DRAFT_00832 | Scaffold       | DRAFT_contig_70_80_len_38341_read_count_650701.13   |          |
| 2558670164 | DRAFT_00832 | Coordinates    | 8609..9643(-)                                       |          |
| 2558670164 | DRAFT_00832 | DNA_length     | 1035bp                                              |          |
| 2558670164 | DRAFT_00832 | Protein_length | 344aa                                               |          |
| 2558670164 | DRAFT_00832 | GC             |                                                     | 0.56     |
| 2558670164 | DRAFT_00832 | Signal_peptide | Yes                                                 |          |
| 2558670164 | DRAFT_00832 | Transmembrane  | Yes                                                 |          |
| 2558670165 | DRAFT_00833 | COG_category   | [L] Replication, recombination and repair           |          |
| 2558670165 | DRAFT_00833 | COG3316        | Transposase and inactivated derivatives             | 7.00E-10 |
| 2558670165 | DRAFT_00833 | pfam13610      | DDE_Tnp_IS240                                       | 9.60E-21 |
| 2558670165 | DRAFT_00833 | Locus_type     | CDS                                                 |          |
| 2558670165 | DRAFT_00833 | Product_name   | Transposase and inactivated derivatives             |          |
| 2558670165 | DRAFT_00833 | Scaffold       | DRAFT_contig_70_80_len_38341_read_count_650701.13   |          |
| 2558670165 | DRAFT_00833 | Coordinates    | 9718..10893(-)                                      |          |
| 2558670165 | DRAFT_00833 | DNA_length     | 1176bp                                              |          |

|            |             |                |                                                                         |          |
|------------|-------------|----------------|-------------------------------------------------------------------------|----------|
| 2558670165 | DRAFT_00833 | Protein_length | 391aa                                                                   |          |
| 2558670165 | DRAFT_00833 | GC             |                                                                         | 0.53     |
| 2558670166 | DRAFT_00834 | Locus_type     | CDS                                                                     |          |
| 2558670166 | DRAFT_00834 | Product_name   | hypothetical protein                                                    |          |
| 2558670166 | DRAFT_00834 | Scaffold       | DRAFT_contig_70_80_len_38341_read_count_650701.13                       |          |
| 2558670166 | DRAFT_00834 | Coordinates    | 11155..11946(-)                                                         |          |
| 2558670166 | DRAFT_00834 | DNA_length     | 792bp                                                                   |          |
| 2558670166 | DRAFT_00834 | Protein_length | 263aa                                                                   |          |
| 2558670166 | DRAFT_00834 | GC             |                                                                         | 0.5      |
| 2558670167 | DRAFT_00835 | Locus_type     | CDS                                                                     |          |
| 2558670167 | DRAFT_00835 | Product_name   | Mn2+-dependent serine/threonine protein kinase                          |          |
| 2558670167 | DRAFT_00835 | Scaffold       | DRAFT_contig_70_80_len_38341_read_count_650701.13                       |          |
| 2558670167 | DRAFT_00835 | Coordinates    | 12281..13906(-)                                                         |          |
| 2558670167 | DRAFT_00835 | DNA_length     | 1626bp                                                                  |          |
| 2558670167 | DRAFT_00835 | Protein_length | 541aa                                                                   |          |
| 2558670167 | DRAFT_00835 | GC             |                                                                         | 0.61     |
| 2558670168 | DRAFT_00836 | Locus_type     | CDS                                                                     |          |
| 2558670168 | DRAFT_00836 | Product_name   | hypothetical protein                                                    |          |
| 2558670168 | DRAFT_00836 | Scaffold       | DRAFT_contig_70_80_len_38341_read_count_650701.13                       |          |
| 2558670168 | DRAFT_00836 | Coordinates    | 13903..14589(-)                                                         |          |
| 2558670168 | DRAFT_00836 | DNA_length     | 687bp                                                                   |          |
| 2558670168 | DRAFT_00836 | Protein_length | 228aa                                                                   |          |
| 2558670168 | DRAFT_00836 | GC             |                                                                         | 0.6      |
| 2558670169 | DRAFT_00837 | COG_category   | [K] Transcription                                                       |          |
| 2558670169 | DRAFT_00837 | COG1522        | Transcriptional regulators                                              | 9.00E-18 |
| 2558670169 | DRAFT_00837 | pfam13412      | HTH_24                                                                  | 3.10E-11 |
| 2558670169 | DRAFT_00837 | pfam01037      | AsnC_trans_reg                                                          | 2.40E-07 |
| 2558670169 | DRAFT_00837 | KO:K03718      | Lrp/AsnC family transcriptional regulator, regulator for asnA, asnC and | 1.20E-34 |
| 2558670169 | DRAFT_00837 | Locus_type     | CDS                                                                     |          |
| 2558670169 | DRAFT_00837 | Product_name   | Transcriptional regulators                                              |          |

|            |             |                |                                                     |          |
|------------|-------------|----------------|-----------------------------------------------------|----------|
| 2558670169 | DRAFT_00837 | Scaffold       | DRAFT_contig_70_80_len_38341_read_count_650701.13   |          |
| 2558670169 | DRAFT_00837 | Coordinates    | 14631..15107(-)                                     |          |
| 2558670169 | DRAFT_00837 | DNA_length     | 477bp                                               |          |
| 2558670169 | DRAFT_00837 | Protein_length | 158aa                                               |          |
| 2558670169 | DRAFT_00837 | GC             |                                                     | 0.59     |
|            |             |                |                                                     |          |
| 2558670170 | DRAFT_00838 | KEGG_module    | M00179: Ribosome, archaea                           |          |
| 2558670170 | DRAFT_00838 | KEGG_module    | M00177: Ribosome, eukaryotes                        |          |
| 2558670170 | DRAFT_00838 | COG_category   | [J] Translation, ribosomal structure and biogenesis |          |
| 2558670170 | DRAFT_00838 | COG2125        | Ribosomal protein S6E (S10)                         | 2.00E-28 |
| 2558670170 | DRAFT_00838 | pfam01092      | Ribosomal_S6e                                       | 4.50E-24 |
| 2558670170 | DRAFT_00838 | KO:K02991      | small subunit ribosomal protein S6e                 | 1.60E-28 |
| 2558670170 | DRAFT_00838 | Locus_type     | CDS                                                 |          |
| 2558670170 | DRAFT_00838 | Product_name   | SSU ribosomal protein S6E                           |          |
| 2558670170 | DRAFT_00838 | Scaffold       | DRAFT_contig_70_80_len_38341_read_count_650701.13   |          |
| 2558670170 | DRAFT_00838 | Coordinates    | 15189..15548(-)                                     |          |
| 2558670170 | DRAFT_00838 | DNA_length     | 360bp                                               |          |
| 2558670170 | DRAFT_00838 | Protein_length | 119aa                                               |          |
| 2558670170 | DRAFT_00838 | GC             |                                                     | 0.59     |
|            |             |                |                                                     |          |
| 2558670171 | DRAFT_00839 | COG_category   | [J] Translation, ribosomal structure and biogenesis |          |
| 2558670171 | DRAFT_00839 | COG0532        | Translation initiation factor 2 (IF-2; GTPase)      | 7.00E-95 |
| 2558670171 | DRAFT_00839 | pfam00009      | GTP_EFTU                                            | 2.30E-27 |
| 2558670171 | DRAFT_00839 | pfam11987      | IF-2                                                | 7.10E-15 |
| 2558670171 | DRAFT_00839 | pfam14578      | GTP_EFTU_D4                                         | 7.60E-17 |
| 2558670171 | DRAFT_00839 | TIGR00491      | translation initiation factor aIF-2/yIF-2           | 0.00E+00 |
| 2558670171 | DRAFT_00839 | TIGR00231      | small GTP-binding protein domain                    | 5.30E-19 |
| 2558670171 | DRAFT_00839 | KO:K03243      | translation initiation factor 5B                    | 0.00E+00 |
| 2558670171 | DRAFT_00839 | Locus_type     | CDS                                                 |          |
| 2558670171 | DRAFT_00839 | Product_name   | translation initiation factor aIF-2/yIF-2           |          |
| 2558670171 | DRAFT_00839 | Scaffold       | DRAFT_contig_70_80_len_38341_read_count_650701.13   |          |
| 2558670171 | DRAFT_00839 | Coordinates    | 15631..17424(-)                                     |          |
| 2558670171 | DRAFT_00839 | DNA_length     | 1794bp                                              |          |
| 2558670171 | DRAFT_00839 | Protein_length | 597aa                                               |          |

|            |             |                |                                                                                           |          |
|------------|-------------|----------------|-------------------------------------------------------------------------------------------|----------|
| 2558670171 | DRAFT_00839 | GC             |                                                                                           | 0.6      |
| 2558670172 | DRAFT_00840 | KEGG_module    | M00049: Adenine ribonucleotide biosynthesis, IMP => ADP,ATP                               |          |
| 2558670172 | DRAFT_00840 | KEGG_module    | M00050: Guanine ribonucleotide biosynthesis IMP => GDP,GTP                                |          |
| 2558670172 | DRAFT_00840 | KEGG_module    | M00053: Pyrimidine deoxyribonucleotide biosynthesis, CDP/CTP => dCDP/dCTP,dTDP/dTTP       |          |
| 2558670172 | DRAFT_00840 | KEGG_module    | M00052: Pyrimidine ribonucleotide biosynthesis, UMP => UDP/UTP,CDP/CTP                    |          |
| 2558670172 | DRAFT_00840 | Metacyc        | PWY-7198: pyrimidine deoxyribonucleotides <i>de novo</i> biosynthesis IV                  |          |
| 2558670172 | DRAFT_00840 | Metacyc        | PWY-7187: pyrimidine deoxyribonucleotides <i>de novo</i> biosynthesis II                  |          |
| 2558670172 | DRAFT_00840 | Metacyc        | PWY-7184: pyrimidine deoxyribonucleotides <i>de novo</i> biosynthesis I                   |          |
| 2558670172 | DRAFT_00840 | Metacyc        | PWY-6545: pyrimidine deoxyribonucleotides <i>de novo</i> biosynthesis III                 |          |
| 2558670172 | DRAFT_00840 | Metacyc        | PPGPPMET-PWY: ppGpp biosynthesis                                                          |          |
| 2558670172 | DRAFT_00840 | Metacyc        | PWY-7210: pyrimidine deoxyribonucleotides biosynthesis from CTP                           |          |
| 2558670172 | DRAFT_00840 | Metacyc        | PWY-6126: adenosine nucleotides <i>de novo</i> biosynthesis                               |          |
| 2558670172 | DRAFT_00840 | Metacyc        | PWY-7197: pyrimidine deoxyribonucleotide phosphorylation                                  |          |
| 2558670172 | DRAFT_00840 | Metacyc        | PWY-6125: guanosine nucleotides <i>de novo</i> biosynthesis                               |          |
| 2558670172 | DRAFT_00840 | Metacyc        | PWY-7205: CMP phosphorylation                                                             |          |
| 2558670172 | DRAFT_00840 | Metacyc        | PWY-7176: UTP and CTP <i>de novo</i> biosynthesis                                         |          |
| 2558670172 | DRAFT_00840 | Metacyc        | PWY0-166: superpathway of pyrimidine deoxyribonucleotides <i>de novo</i> biosynthesis (E. |          |
| 2558670172 | DRAFT_00840 | IMG_pathway    | 296: GTP biosynthesis                                                                     |          |
| 2558670172 | DRAFT_00840 | IMG_pathway    | 323: UTP synthesis                                                                        |          |
| 2558670172 | DRAFT_00840 | IMG_pathway    | 332: dTTP synthesis                                                                       |          |
| 2558670172 | DRAFT_00840 | IMG_pathway    | 476: Cytidine conversion to CTP                                                           |          |
| 2558670172 | DRAFT_00840 | COG_category   | [F] Nucleotide transport and metabolism                                                   |          |
| 2558670172 | DRAFT_00840 | COG0105        | Nucleoside diphosphate kinase                                                             | 2.00E-45 |
| 2558670172 | DRAFT_00840 | pfam00334      | NDK                                                                                       | 1.10E-48 |
| 2558670172 | DRAFT_00840 | EC:2.7.4.6     | Nucleoside-diphosphate kinase.                                                            |          |
| 2558670172 | DRAFT_00840 | KO:K00940      | nucleoside-diphosphate kinase [EC:2.7.4.6]                                                | 3.90E-42 |
| 2558670172 | DRAFT_00840 | ITERM:01287    | nucleoside diphosphate kinase (EC 2.7.4.6)                                                |          |
| 2558670172 | DRAFT_00840 | Locus_type     | CDS                                                                                       |          |
| 2558670172 | DRAFT_00840 | Product_name   | nucleoside diphosphate kinase (EC 2.7.4.6)                                                |          |
| 2558670172 | DRAFT_00840 | Scaffold       | DRAFT_contig_70_80_len_38341_read_count_650701.13                                         |          |
| 2558670172 | DRAFT_00840 | Coordinates    | 17454..17873(-)                                                                           |          |
| 2558670172 | DRAFT_00840 | DNA_length     | 420bp                                                                                     |          |
| 2558670172 | DRAFT_00840 | Protein_length | 139aa                                                                                     |          |

|            |             |                |                                                     |          |
|------------|-------------|----------------|-----------------------------------------------------|----------|
| 2558670172 | DRAFT_00840 | GC             |                                                     | 0.59     |
| 2558670173 | DRAFT_00841 | KEGG_module    | M00179: Ribosome, archaea                           |          |
| 2558670173 | DRAFT_00841 | KEGG_module    | M00177: Ribosome, eukaryotes                        |          |
| 2558670173 | DRAFT_00841 | COG_category   | [J] Translation, ribosomal structure and biogenesis |          |
| 2558670173 | DRAFT_00841 | COG2075        | Ribosomal protein L24E                              | 8.00E-09 |
| 2558670173 | DRAFT_00841 | pfam01246      | Ribosomal_L24e                                      | 5.90E-13 |
| 2558670173 | DRAFT_00841 | KO:K02896      | large subunit ribosomal protein L24e                | 7.70E-11 |
| 2558670173 | DRAFT_00841 | ITERM:00247    | LSU ribosomal protein L24E                          |          |
| 2558670173 | DRAFT_00841 | Locus_type     | CDS                                                 |          |
| 2558670173 | DRAFT_00841 | Product_name   | LSU ribosomal protein L24E                          |          |
| 2558670173 | DRAFT_00841 | Scaffold       | DRAFT_contig_70_80_len_38341_read_count_650701.13   |          |
| 2558670173 | DRAFT_00841 | Coordinates    | 17870..18052(-)                                     |          |
| 2558670173 | DRAFT_00841 | DNA_length     | 183bp                                               |          |
| 2558670173 | DRAFT_00841 | Protein_length | 60aa                                                |          |
| 2558670173 | DRAFT_00841 | GC             |                                                     | 0.5      |
| 2558670174 | DRAFT_00842 | KEGG_module    | M00179: Ribosome, archaea                           |          |
| 2558670174 | DRAFT_00842 | KEGG_module    | M00177: Ribosome, eukaryotes                        |          |
| 2558670174 | DRAFT_00842 | COG_category   | [J] Translation, ribosomal structure and biogenesis |          |
| 2558670174 | DRAFT_00842 | COG2053        | Ribosomal protein S28E/S33                          | 1.00E-15 |
| 2558670174 | DRAFT_00842 | pfam01200      | Ribosomal_S28e                                      | 6.60E-30 |
| 2558670174 | DRAFT_00842 | KO:K02979      | small subunit ribosomal protein S28e                | 1.80E-22 |
| 2558670174 | DRAFT_00842 | Locus_type     | CDS                                                 |          |
| 2558670174 | DRAFT_00842 | Product_name   | Ribosomal protein S28E/S33                          |          |
| 2558670174 | DRAFT_00842 | Scaffold       | DRAFT_contig_70_80_len_38341_read_count_650701.13   |          |
| 2558670174 | DRAFT_00842 | Coordinates    | 18167..18382(-)                                     |          |
| 2558670174 | DRAFT_00842 | DNA_length     | 216bp                                               |          |
| 2558670174 | DRAFT_00842 | Protein_length | 71aa                                                |          |
| 2558670174 | DRAFT_00842 | GC             |                                                     | 0.52     |
| 2558670175 | DRAFT_00843 | KEGG_module    | M00177: Ribosome, eukaryotes                        |          |
| 2558670175 | DRAFT_00843 | KEGG_module    | M00179: Ribosome, archaea                           |          |
| 2558670175 | DRAFT_00843 | COG_category   | [J] Translation, ribosomal structure and biogenesis |          |

|            |             |                |                                                            |          |
|------------|-------------|----------------|------------------------------------------------------------|----------|
| 2558670175 | DRAFT_00843 | COG1358        | Ribosomal protein HS6-type (S12/L30/L7a)                   | 8.00E-24 |
| 2558670175 | DRAFT_00843 | pfam01248      | Ribosomal_L7Ae                                             | 8.40E-29 |
| 2558670175 | DRAFT_00843 | TIGR03677      | 50S ribosomal protein L7Ae                                 | 5.50E-52 |
| 2558670175 | DRAFT_00843 | KO:K02936      | large subunit ribosomal protein L7Ae                       | 1.60E-37 |
| 2558670175 | DRAFT_00843 | ITERM:00224    | LSU ribosomal protein L7AE                                 |          |
| 2558670175 | DRAFT_00843 | Locus_type     | CDS                                                        |          |
| 2558670175 | DRAFT_00843 | Product_name   | LSU ribosomal protein L7AE                                 |          |
| 2558670175 | DRAFT_00843 | Scaffold       | DRAFT_contig_70_80_len_38341_read_count_650701.13          |          |
| 2558670175 | DRAFT_00843 | Coordinates    | 18379..18759(-)                                            |          |
| 2558670175 | DRAFT_00843 | DNA_length     | 381bp                                                      |          |
| 2558670175 | DRAFT_00843 | Protein_length | 126aa                                                      |          |
| 2558670175 | DRAFT_00843 | GC             |                                                            | 0.59     |
| 2558670176 | DRAFT_00844 | KEGG_module    | M00121: Heme biosynthesis, glutamate => protoheme/siroheme |          |
| 2558670176 | DRAFT_00844 | KEGG_module    | M00360: Aminoacyl-tRNA biosynthesis, prokaryotes           |          |
| 2558670176 | DRAFT_00844 | KEGG_module    | M00359: Aminoacyl-tRNA biosynthesis, eukaryotes            |          |
| 2558670176 | DRAFT_00844 | Metacyc        | PWY-5188: tetrapyrrole biosynthesis I (from glutamate)     |          |
| 2558670176 | DRAFT_00844 | Metacyc        | TRNA-CHARGING-PWY: tRNA charging                           |          |
| 2558670176 | DRAFT_00844 | COG_category   | [J] Translation, ribosomal structure and biogenesis        |          |
| 2558670176 | DRAFT_00844 | COG0008        | Glutamyl- and glutaminyl-tRNA synthetases                  | 9.00E-69 |
| 2558670176 | DRAFT_00844 | pfam03950      | tRNA-synt_1c_C                                             | 1.40E-26 |
| 2558670176 | DRAFT_00844 | pfam00749      | tRNA-synt_1c                                               | 1.00E-65 |
| 2558670176 | DRAFT_00844 | EC:6.1.1.17    | Glutamate--tRNA ligase.                                    |          |
| 2558670176 | DRAFT_00844 | TIGR00463      | glutamyl-tRNA synthetase, archaeal and eukaryotic family   | 0.00E+00 |
| 2558670176 | DRAFT_00844 | KO:K01885      | glutamyl-tRNA synthetase [EC:6.1.1.17]                     | 0.00E+00 |
| 2558670176 | DRAFT_00844 | Locus_type     | CDS                                                        |          |
| 2558670176 | DRAFT_00844 | Product_name   | glutamyl-tRNA synthetase, archaeal and eukaryotic family   |          |
| 2558670176 | DRAFT_00844 | Scaffold       | DRAFT_contig_70_80_len_38341_read_count_650701.13          |          |
| 2558670176 | DRAFT_00844 | Coordinates    | 18917..20635(-)                                            |          |
| 2558670176 | DRAFT_00844 | DNA_length     | 1719bp                                                     |          |
| 2558670176 | DRAFT_00844 | Protein_length | 572aa                                                      |          |
| 2558670176 | DRAFT_00844 | GC             |                                                            | 0.57     |
| 2558670177 | DRAFT_00845 | KEGG_module    | M00364: C10-C20 isoprenoid biosynthesis, bacteria          |          |



|            |             |                |                                                                                |          |
|------------|-------------|----------------|--------------------------------------------------------------------------------|----------|
| 2558670177 | DRAFT_00845 | KEGG_module    | M00366: C10-C20 isoprenoid biosynthesis, plants                                |          |
| 2558670177 | DRAFT_00845 | Metacyc        | PWY-6659: fusicoccins biosynthesis                                             |          |
| 2558670177 | DRAFT_00845 | Metacyc        | PWY-5122: geranyl diphosphate biosynthesis                                     |          |
| 2558670177 | DRAFT_00845 | Metacyc        | PWY-6859: <i>all-trans</i>-farnesol biosynthesis                               |          |
| 2558670177 | DRAFT_00845 | Metacyc        | PWY-6691: plaunotol biosynthesis                                               |          |
| 2558670177 | DRAFT_00845 | Metacyc        | PWY-5123: <i>trans, trans</i>-farnesyl diphosphate biosynthesis                |          |
| 2558670177 | DRAFT_00845 | Metacyc        | PWY-7141: linalool biosynthesis II                                             |          |
| 2558670177 | DRAFT_00845 | Metacyc        | PWY-5120: geranylgeranyldiphosphate biosynthesis                               |          |
| 2558670177 | DRAFT_00845 | Metacyc        | PWY2OL-4: superpathway of linalool biosynthesis                                |          |
| 2558670177 | DRAFT_00845 | Metacyc        | PWY-6383: mono-<i>trans</i>, poly-<i>cis</i> decaprenyl phosphate biosynthesis |          |
| 2558670177 | DRAFT_00845 | Metacyc        | PWY-7182: linalool biosynthesis I                                              |          |
| 2558670177 | DRAFT_00845 | Metacyc        | PWY-7102: bisabolene biosynthesis                                              |          |
| 2558670177 | DRAFT_00845 | COG_category   | [H] Coenzyme transport and metabolism                                          |          |
| 2558670177 | DRAFT_00845 | COG0142        | Geranylgeranyl pyrophosphate synthase                                          | 4.00E-55 |
| 2558670177 | DRAFT_00845 | pfam00348      | polyprenyl_synt                                                                | 1.60E-52 |
| 2558670177 | DRAFT_00845 | EC:2.5.1.29    | Geranylgeranyl diphosphate synthase.                                           |          |
| 2558670177 | DRAFT_00845 | EC:2.5.1.1     | Dimethylallyltranstransferase.                                                 |          |
| 2558670177 | DRAFT_00845 | EC:2.5.1.10    | (2E,6E)-farnesyl diphosphate synthase.                                         |          |
| 2558670177 | DRAFT_00845 | KO:K13789      | geranylgeranyl diphosphate synthase, type II [EC:2.5.1.1 2.5.1.10 2.5.1.       | 0.00E+00 |
| 2558670177 | DRAFT_00845 | Locus_type     | CDS                                                                            |          |
| 2558670177 | DRAFT_00845 | Product_name   | Geranylgeranyl pyrophosphate synthase                                          |          |
| 2558670177 | DRAFT_00845 | Scaffold       | DRAFT_contig_70_80_len_38341_read_count_650701.13                              |          |
| 2558670177 | DRAFT_00845 | Coordinates    | 20629..21660(-)                                                                |          |
| 2558670177 | DRAFT_00845 | DNA_length     | 1032bp                                                                         |          |
| 2558670177 | DRAFT_00845 | Protein_length | 343aa                                                                          |          |
| 2558670177 | DRAFT_00845 | GC             |                                                                                | 0.59     |
| 2558670178 | DRAFT_00846 | Metacyc        | PWY-6174: mevalonate pathway II (archaea)                                      |          |
| 2558670178 | DRAFT_00846 | IMG_pathway    | 591: Archaeal mevalonate pathway for isopentenyl pyrophosphate synthesis       |          |
| 2558670178 | DRAFT_00846 | COG_category   | [R] General function prediction only                                           |          |
| 2558670178 | DRAFT_00846 | COG1608        | Predicted archaeal kinase                                                      | 2.00E-48 |
| 2558670178 | DRAFT_00846 | pfam00696      | AA_kinase                                                                      | 2.40E-29 |
| 2558670178 | DRAFT_00846 | EC:2.7.4.26    | Isopentenyl phosphate kinase.                                                  |          |
| 2558670178 | DRAFT_00846 | KO:K06981      | isopentenyl phosphate kinase [EC:2.7.4.26]                                     | 2.10E-38 |

|            |             |                |                                                                          |          |
|------------|-------------|----------------|--------------------------------------------------------------------------|----------|
| 2558670178 | DRAFT_00846 | ITERM:05321    | isopentenyl phosphate kinase (EC 2.7.4.-)                                |          |
| 2558670178 | DRAFT_00846 | Locus_type     | CDS                                                                      |          |
| 2558670178 | DRAFT_00846 | Product_name   | isopentenyl phosphate kinase (EC 2.7.4.-)                                |          |
| 2558670178 | DRAFT_00846 | Scaffold       | DRAFT_contig_70_80_len_38341_read_count_650701.13                        |          |
| 2558670178 | DRAFT_00846 | Coordinates    | 21686..22432(-)                                                          |          |
| 2558670178 | DRAFT_00846 | DNA_length     | 747bp                                                                    |          |
| 2558670178 | DRAFT_00846 | Protein_length | 248aa                                                                    |          |
| 2558670178 | DRAFT_00846 | GC             |                                                                          | 0.59     |
| 2558670179 | DRAFT_00847 | KEGG_module    | M00095: C5 isoprenoid biosynthesis, mevalonate pathway                   |          |
| 2558670179 | DRAFT_00847 | Metacyc        | PWY-6174: mevalonate pathway II (archaea)                                |          |
| 2558670179 | DRAFT_00847 | Metacyc        | PWY-922: mevalonate pathway I                                            |          |
| 2558670179 | DRAFT_00847 | IMG_pathway    | 178: Mevalonate pathway for isopentenyl pyrophosphate synthesis          |          |
| 2558670179 | DRAFT_00847 | IMG_pathway    | 591: Archaeal mevalonate pathway for isopentenyl pyrophosphate synthesis |          |
| 2558670179 | DRAFT_00847 | COG_category   | [I] Lipid transport and metabolism                                       |          |
| 2558670179 | DRAFT_00847 | COG1577        | Mevalonate kinase                                                        | 2.00E-52 |
| 2558670179 | DRAFT_00847 | pfam00288      | GHMP_kinases_N                                                           | 6.30E-18 |
| 2558670179 | DRAFT_00847 | pfam08544      | GHMP_kinases_C                                                           | 7.90E-14 |
| 2558670179 | DRAFT_00847 | EC:2.7.1.36    | Mevalonate kinase.                                                       |          |
| 2558670179 | DRAFT_00847 | TIGR00549      | mevalonate kinase                                                        | 9.60E-69 |
| 2558670179 | DRAFT_00847 | KO:K00869      | mevalonate kinase [EC:2.7.1.36]                                          | 0.00E+00 |
| 2558670179 | DRAFT_00847 | ITERM:00464    | mevalonate kinase (EC 2.7.1.36)                                          |          |
| 2558670179 | DRAFT_00847 | Locus_type     | CDS                                                                      |          |
| 2558670179 | DRAFT_00847 | Product_name   | mevalonate kinase (EC 2.7.1.36)                                          |          |
| 2558670179 | DRAFT_00847 | Scaffold       | DRAFT_contig_70_80_len_38341_read_count_650701.13                        |          |
| 2558670179 | DRAFT_00847 | Coordinates    | 22417..23346(-)                                                          |          |
| 2558670179 | DRAFT_00847 | DNA_length     | 930bp                                                                    |          |
| 2558670179 | DRAFT_00847 | Protein_length | 309aa                                                                    |          |
| 2558670179 | DRAFT_00847 | GC             |                                                                          | 0.62     |
| 2558670180 | DRAFT_00848 | COG_category   | [R] General function prediction only                                     |          |
| 2558670180 | DRAFT_00848 | COG1355        | Predicted dioxygenase                                                    | 2.00E-84 |
| 2558670180 | DRAFT_00848 | pfam01875      | Memo                                                                     | 1.90E-76 |
| 2558670180 | DRAFT_00848 | TIGR04336      | AmmeMemoRadiSam system protein B                                         | 6.20E-94 |

|            |             |                |                                                     |          |
|------------|-------------|----------------|-----------------------------------------------------|----------|
| 2558670180 | DRAFT_00848 | Locus_type     | CDS                                                 |          |
| 2558670180 | DRAFT_00848 | Product_name   | AmmeMemoRadiSam system protein B                    |          |
| 2558670180 | DRAFT_00848 | Scaffold       | DRAFT_contig_70_80_len_38341_read_count_650701.13   |          |
| 2558670180 | DRAFT_00848 | Coordinates    | 23350..24225(-)                                     |          |
| 2558670180 | DRAFT_00848 | DNA_length     | 876bp                                               |          |
| 2558670180 | DRAFT_00848 | Protein_length | 291aa                                               |          |
| 2558670180 | DRAFT_00848 | GC             |                                                     | 0.57     |
| 2558670181 | DRAFT_00849 | KEGG_module    | M00179: Ribosome, archaea                           |          |
| 2558670181 | DRAFT_00849 | KEGG_module    | M00178: Ribosome, bacteria                          |          |
| 2558670181 | DRAFT_00849 | COG_category   | [J] Translation, ribosomal structure and biogenesis |          |
| 2558670181 | DRAFT_00849 | COG0052        | Ribosomal protein S2                                | 2.00E-33 |
| 2558670181 | DRAFT_00849 | pfam00318      | Ribosomal_S2                                        | 7.60E-12 |
| 2558670181 | DRAFT_00849 | pfam00318      | Ribosomal_S2                                        | 1.10E-17 |
| 2558670181 | DRAFT_00849 | TIGR01012      | ribosomal protein Sa(cytosolic)/S2(archaeal)        | 3.50E-64 |
| 2558670181 | DRAFT_00849 | KO:K02967      | small subunit ribosomal protein S2                  | 0.00E+00 |
| 2558670181 | DRAFT_00849 | Locus_type     | CDS                                                 |          |
| 2558670181 | DRAFT_00849 | Product_name   | Ribosomal protein S2                                |          |
| 2558670181 | DRAFT_00849 | Scaffold       | DRAFT_contig_70_80_len_38341_read_count_650701.13   |          |
| 2558670181 | DRAFT_00849 | Coordinates    | 24225..24893(-)                                     |          |
| 2558670181 | DRAFT_00849 | DNA_length     | 669bp                                               |          |
| 2558670181 | DRAFT_00849 | Protein_length | 222aa                                               |          |
| 2558670181 | DRAFT_00849 | GC             |                                                     | 0.59     |
| 2558670182 | DRAFT_00850 | KEGG_module    | M00184: RNA polymerase, archaea                     |          |
| 2558670182 | DRAFT_00850 | COG_category   | [K] Transcription                                   |          |
| 2558670182 | DRAFT_00850 | COG1644        | DNA-directed RNA polymerase, subunit N (RpoN/RPB10) | 9.00E-23 |
| 2558670182 | DRAFT_00850 | pfam01194      | RNA_pol_N                                           | 1.00E-28 |
| 2558670182 | DRAFT_00850 | EC:2.7.7.6     | DNA-directed RNA polymerase.                        |          |
| 2558670182 | DRAFT_00850 | KO:K03058      | DNA-directed RNA polymerase subunit N [EC:2.7.7.6]  | 3.60E-20 |
| 2558670182 | DRAFT_00850 | ITERM:01913    | DNA-directed RNA polymerase, subunit N (EC 2.7.7.6) |          |
| 2558670182 | DRAFT_00850 | Locus_type     | CDS                                                 |          |
| 2558670182 | DRAFT_00850 | Product_name   | DNA-directed RNA polymerase, subunit N (EC 2.7.7.6) |          |
| 2558670182 | DRAFT_00850 | Scaffold       | DRAFT_contig_70_80_len_38341_read_count_650701.13   |          |

|            |             |                |                                                     |          |
|------------|-------------|----------------|-----------------------------------------------------|----------|
| 2558670182 | DRAFT_00850 | Coordinates    | 24913..25125(-)                                     |          |
| 2558670182 | DRAFT_00850 | DNA_length     | 213bp                                               |          |
| 2558670182 | DRAFT_00850 | Protein_length | 70aa                                                |          |
| 2558670182 | DRAFT_00850 | GC             |                                                     | 0.54     |
|            |             |                |                                                     |          |
| 2558670183 | DRAFT_00851 | KEGG_module    | M00179: Ribosome, archaea                           |          |
| 2558670183 | DRAFT_00851 | KEGG_module    | M00178: Ribosome, bacteria                          |          |
| 2558670183 | DRAFT_00851 | COG_category   | [J] Translation, ribosomal structure and biogenesis |          |
| 2558670183 | DRAFT_00851 | COG0103        | Ribosomal protein S9                                | 4.00E-28 |
| 2558670183 | DRAFT_00851 | pfam00380      | Ribosomal_S9                                        | 1.60E-30 |
| 2558670183 | DRAFT_00851 | KO:K02996      | small subunit ribosomal protein S9                  | 8.50E-32 |
| 2558670183 | DRAFT_00851 | Locus_type     | CDS                                                 |          |
| 2558670183 | DRAFT_00851 | Product_name   | Ribosomal protein S9                                |          |
| 2558670183 | DRAFT_00851 | Scaffold       | DRAFT_contig_70_80_len_38341_read_count_650701.13   |          |
| 2558670183 | DRAFT_00851 | Coordinates    | 25132..25563(-)                                     |          |
| 2558670183 | DRAFT_00851 | DNA_length     | 432bp                                               |          |
| 2558670183 | DRAFT_00851 | Protein_length | 143aa                                               |          |
| 2558670183 | DRAFT_00851 | GC             |                                                     | 0.58     |
|            |             |                |                                                     |          |
| 2558670184 | DRAFT_00852 | KEGG_module    | M00178: Ribosome, bacteria                          |          |
| 2558670184 | DRAFT_00852 | KEGG_module    | M00179: Ribosome, archaea                           |          |
| 2558670184 | DRAFT_00852 | COG_category   | [J] Translation, ribosomal structure and biogenesis |          |
| 2558670184 | DRAFT_00852 | COG0102        | Ribosomal protein L13                               | 2.00E-19 |
| 2558670184 | DRAFT_00852 | pfam00572      | Ribosomal_L13                                       | 1.80E-22 |
| 2558670184 | DRAFT_00852 | TIGR01077      | ribosomal protein L13, archaeal/eukaryotic          | 7.30E-45 |
| 2558670184 | DRAFT_00852 | KO:K02871      | large subunit ribosomal protein L13                 | 3.10E-37 |
| 2558670184 | DRAFT_00852 | Locus_type     | CDS                                                 |          |
| 2558670184 | DRAFT_00852 | Product_name   | ribosomal protein L13, archaeal/eukaryotic          |          |
| 2558670184 | DRAFT_00852 | Scaffold       | DRAFT_contig_70_80_len_38341_read_count_650701.13   |          |
| 2558670184 | DRAFT_00852 | Coordinates    | 25566..26006(-)                                     |          |
| 2558670184 | DRAFT_00852 | DNA_length     | 441bp                                               |          |
| 2558670184 | DRAFT_00852 | Protein_length | 146aa                                               |          |
| 2558670184 | DRAFT_00852 | GC             |                                                     | 0.56     |

|            |             |                |                                                          |          |
|------------|-------------|----------------|----------------------------------------------------------|----------|
| 2558670185 | DRAFT_00853 | KEGG_module    | M00179: Ribosome, archaea                                |          |
| 2558670185 | DRAFT_00853 | KEGG_module    | M00177: Ribosome, eukaryotes                             |          |
| 2558670185 | DRAFT_00853 | COG_category   | [J] Translation, ribosomal structure and biogenesis      |          |
| 2558670185 | DRAFT_00853 | COG1727        | Ribosomal protein L18E                                   | 1.00E-25 |
| 2558670185 | DRAFT_00853 | pfam00828      | Ribosomal_L18e                                           | 4.60E-11 |
| 2558670185 | DRAFT_00853 | KO:K02883      | large subunit ribosomal protein L18e                     | 3.80E-22 |
| 2558670185 | DRAFT_00853 | Locus_type     | CDS                                                      |          |
| 2558670185 | DRAFT_00853 | Product_name   | Ribosomal protein L18E                                   |          |
| 2558670185 | DRAFT_00853 | Scaffold       | DRAFT_contig_70_80_len_38341_read_count_650701.13        |          |
| 2558670185 | DRAFT_00853 | Coordinates    | 25996..26349(-)                                          |          |
| 2558670185 | DRAFT_00853 | DNA_length     | 354bp                                                    |          |
| 2558670185 | DRAFT_00853 | Protein_length | 117aa                                                    |          |
| 2558670185 | DRAFT_00853 | GC             |                                                          | 0.58     |
| 2558670186 | DRAFT_00854 | KEGG_module    | M00184: RNA polymerase, archaea                          |          |
| 2558670186 | DRAFT_00854 | pfam01000      | RNA_pol_A_bac                                            | 2.20E-27 |
| 2558670186 | DRAFT_00854 | pfam01193      | RNA_pol_L                                                | 2.60E-11 |
| 2558670186 | DRAFT_00854 | EC:2.7.7.6     | DNA-directed RNA polymerase.                             |          |
| 2558670186 | DRAFT_00854 | KO:K03047      | DNA-directed RNA polymerase subunit D [EC:2.7.7.6]       | 0.00E+00 |
| 2558670186 | DRAFT_00854 | Locus_type     | CDS                                                      |          |
| 2558670186 | DRAFT_00854 | Product_name   | DNA-directed RNA polymerase, alpha subunit/40 kD subunit |          |
| 2558670186 | DRAFT_00854 | Scaffold       | DRAFT_contig_70_80_len_38341_read_count_650701.13        |          |
| 2558670186 | DRAFT_00854 | Coordinates    | 26346..26984(-)                                          |          |
| 2558670186 | DRAFT_00854 | DNA_length     | 639bp                                                    |          |
| 2558670186 | DRAFT_00854 | Protein_length | 212aa                                                    |          |
| 2558670186 | DRAFT_00854 | GC             |                                                          | 0.58     |
| 2558670187 | DRAFT_00855 | KEGG_module    | M00178: Ribosome, bacteria                               |          |
| 2558670187 | DRAFT_00855 | KEGG_module    | M00179: Ribosome, archaea                                |          |
| 2558670187 | DRAFT_00855 | COG_category   | [J] Translation, ribosomal structure and biogenesis      |          |
| 2558670187 | DRAFT_00855 | COG0099        | Ribosomal protein S13                                    | 1.00E-23 |
| 2558670187 | DRAFT_00855 | pfam00416      | Ribosomal_S13                                            | 2.10E-28 |
| 2558670187 | DRAFT_00855 | TIGR03629      | archaeal ribosomal protein S13P                          | 1.00E-58 |
| 2558670187 | DRAFT_00855 | KO:K02952      | small subunit ribosomal protein S13                      | 1.60E-42 |

|            |             |                |                                                                  |          |
|------------|-------------|----------------|------------------------------------------------------------------|----------|
| 2558670187 | DRAFT_00855 | Locus_type     | CDS                                                              |          |
| 2558670187 | DRAFT_00855 | Product_name   | archaeal ribosomal protein S13P                                  |          |
| 2558670187 | DRAFT_00855 | Scaffold       | DRAFT_contig_70_80_len_38341_read_count_650701.13                |          |
| 2558670187 | DRAFT_00855 | Coordinates    | 27173..27667(+)                                                  |          |
| 2558670187 | DRAFT_00855 | DNA_length     | 495bp                                                            |          |
| 2558670187 | DRAFT_00855 | Protein_length | 164aa                                                            |          |
| 2558670187 | DRAFT_00855 | GC             |                                                                  | 0.57     |
|            |             |                |                                                                  |          |
| 2558670188 | DRAFT_00856 | KEGG_module    | M00179: Ribosome, archaea                                        |          |
| 2558670188 | DRAFT_00856 | KEGG_module    | M00178: Ribosome, bacteria                                       |          |
| 2558670188 | DRAFT_00856 | pfam01479      | S4                                                               | 2.00E-13 |
| 2558670188 | DRAFT_00856 | TIGR01018      | ribosomal protein S4(archaeal type)/S9(eukaryote cytosolic type) | 9.80E-59 |
| 2558670188 | DRAFT_00856 | KO:K02986      | small subunit ribosomal protein S4                               | 2.80E-45 |
| 2558670188 | DRAFT_00856 | Locus_type     | CDS                                                              |          |
| 2558670188 | DRAFT_00856 | Product_name   | SSU ribosomal protein S4P                                        |          |
| 2558670188 | DRAFT_00856 | Scaffold       | DRAFT_contig_70_80_len_38341_read_count_650701.13                |          |
| 2558670188 | DRAFT_00856 | Coordinates    | 27671..28255(+)                                                  |          |
| 2558670188 | DRAFT_00856 | DNA_length     | 585bp                                                            |          |
| 2558670188 | DRAFT_00856 | Protein_length | 194aa                                                            |          |
| 2558670188 | DRAFT_00856 | GC             |                                                                  | 0.59     |
|            |             |                |                                                                  |          |
| 2558670189 | DRAFT_00857 | KEGG_module    | M00179: Ribosome, archaea                                        |          |
| 2558670189 | DRAFT_00857 | KEGG_module    | M00178: Ribosome, bacteria                                       |          |
| 2558670189 | DRAFT_00857 | COG_category   | [J] Translation, ribosomal structure and biogenesis              |          |
| 2558670189 | DRAFT_00857 | COG0100        | Ribosomal protein S11                                            | 2.00E-32 |
| 2558670189 | DRAFT_00857 | pfam00411      | Ribosomal_S11                                                    | 8.10E-40 |
| 2558670189 | DRAFT_00857 | TIGR03628      | archaeal ribosomal protein S11P                                  | 3.10E-62 |
| 2558670189 | DRAFT_00857 | KO:K02948      | small subunit ribosomal protein S11                              | 0.00E+00 |
| 2558670189 | DRAFT_00857 | Locus_type     | CDS                                                              |          |
| 2558670189 | DRAFT_00857 | Product_name   | SSU ribosomal protein S11P                                       |          |
| 2558670189 | DRAFT_00857 | Scaffold       | DRAFT_contig_70_80_len_38341_read_count_650701.13                |          |
| 2558670189 | DRAFT_00857 | Coordinates    | 28262..28669(+)                                                  |          |
| 2558670189 | DRAFT_00857 | DNA_length     | 408bp                                                            |          |
| 2558670189 | DRAFT_00857 | Protein_length | 135aa                                                            |          |

|            |             |                |                                                                         |          |
|------------|-------------|----------------|-------------------------------------------------------------------------|----------|
| 2558670189 | DRAFT_00857 | GC             |                                                                         | 0.56     |
| 2558670190 | DRAFT_00858 | COG_category   | [K] Transcription                                                       |          |
| 2558670190 | DRAFT_00858 | COG1695        | Predicted transcriptional regulators                                    | 2.00E-06 |
| 2558670190 | DRAFT_00858 | pfam12840      | HTH_20                                                                  | 1.30E-09 |
| 2558670190 | DRAFT_00858 | pfam05124      | S_layer_C                                                               | 8.70E-07 |
| 2558670190 | DRAFT_00858 | Locus_type     | CDS                                                                     |          |
| 2558670190 | DRAFT_00858 | Product_name   | Predicted transcriptional regulators                                    |          |
| 2558670190 | DRAFT_00858 | Scaffold       | DRAFT_contig_70_80_len_38341_read_count_650701.13                       |          |
| 2558670190 | DRAFT_00858 | Coordinates    | 28673..29620(-)                                                         |          |
| 2558670190 | DRAFT_00858 | DNA_length     | 948bp                                                                   |          |
| 2558670190 | DRAFT_00858 | Protein_length | 315aa                                                                   |          |
| 2558670190 | DRAFT_00858 | GC             |                                                                         | 0.59     |
| 2558670191 | DRAFT_00859 | Metacyc        | UDPNAGSYN-PWY: UDP-<i>N</i>-acetyl-D-glucosamine biosynthesis I         |          |
| 2558670191 | DRAFT_00859 | Metacyc        | PWY-6749: CMP-legionamate biosynthesis I                                |          |
| 2558670191 | DRAFT_00859 | Metacyc        | UDPNACETYLGALSYN-PWY: UDP-<i>N</i>-acetyl-D-glucosamine biosynthesis II |          |
| 2558670191 | DRAFT_00859 | COG_category   | [M] Cell wall/membrane/envelope biogenesis                              |          |
| 2558670191 | DRAFT_00859 | COG0449        | Glucosamine 6-phosphate synthetase, contains amidotransferase and       | 0.00E+00 |
| 2558670191 | DRAFT_00859 | pfam01380      | SIS                                                                     | 3.50E-29 |
| 2558670191 | DRAFT_00859 | pfam13522      | GATase_6                                                                | 3.50E-23 |
| 2558670191 | DRAFT_00859 | pfam01380      | SIS                                                                     | 5.70E-20 |
| 2558670191 | DRAFT_00859 | EC:2.6.1.16    | Glutamine--fructose-6-phosphate transaminase (isomerizing).             |          |
| 2558670191 | DRAFT_00859 | TIGR01135      | glucosamine--fructose-6-phosphate aminotransferase (isomerizing)        | 0.00E+00 |
| 2558670191 | DRAFT_00859 | KO:K00820      | glucosamine--fructose-6-phosphate aminotransferase (isomerizing) [EC    | 0.00E+00 |
| 2558670191 | DRAFT_00859 | Locus_type     | CDS                                                                     |          |
| 2558670191 | DRAFT_00859 | Product_name   | glucosamine--fructose-6-phosphate aminotransferase (isomerizing)        |          |
| 2558670191 | DRAFT_00859 | Scaffold       | DRAFT_contig_70_80_len_38341_read_count_650701.13                       |          |
| 2558670191 | DRAFT_00859 | Coordinates    | 29712..31538(+)                                                         |          |
| 2558670191 | DRAFT_00859 | DNA_length     | 1827bp                                                                  |          |
| 2558670191 | DRAFT_00859 | Protein_length | 608aa                                                                   |          |
| 2558670191 | DRAFT_00859 | GC             |                                                                         | 0.58     |
| 2558670192 | DRAFT_00860 | Metacyc        | PWY-5905: hypusine biosynthesis                                         |          |

|            |             |                |                                                                     |          |
|------------|-------------|----------------|---------------------------------------------------------------------|----------|
| 2558670192 | DRAFT_00860 | COG_category   | [O] Posttranslational modification, protein turnover, chaperones    |          |
| 2558670192 | DRAFT_00860 | COG1899        | Deoxyhypusine synthase                                              | 6.00E-84 |
| 2558670192 | DRAFT_00860 | pfam01916      | DS                                                                  | 4.10E-70 |
| 2558670192 | DRAFT_00860 | EC:2.5.1.46    | Deoxyhypusine synthase.                                             |          |
| 2558670192 | DRAFT_00860 | TIGR00321      | deoxyhypusine synthase                                              | 2.60E-94 |
| 2558670192 | DRAFT_00860 | KO:K00809      | deoxyhypusine synthase [EC:2.5.1.46]                                | 0.00E+00 |
| 2558670192 | DRAFT_00860 | Locus_type     | CDS                                                                 |          |
| 2558670192 | DRAFT_00860 | Product_name   | deoxyhypusine synthase (EC 2.5.1.46)                                |          |
| 2558670192 | DRAFT_00860 | Scaffold       | DRAFT_contig_70_80_len_38341_read_count_650701.13                   |          |
| 2558670192 | DRAFT_00860 | Coordinates    | 31574..32593(+)                                                     |          |
| 2558670192 | DRAFT_00860 | DNA_length     | 1020bp                                                              |          |
| 2558670192 | DRAFT_00860 | Protein_length | 339aa                                                               |          |
| 2558670192 | DRAFT_00860 | GC             |                                                                     | 0.57     |
| 2558670193 | DRAFT_00861 | KEGG_module    | M00049: Adenine ribonucleotide biosynthesis, IMP => ADP,ATP         |          |
| 2558670193 | DRAFT_00861 | KEGG_module    | M00048: Inosine monophosphate biosynthesis, PRPP + glutamine => IMP |          |
| 2558670193 | DRAFT_00861 | Metacyc        | PWY-841: purine nucleotides <i>de novo</i> biosynthesis II          |          |
| 2558670193 | DRAFT_00861 | Metacyc        | PWY-6124: inosine-5'-phosphate biosynthesis II                      |          |
| 2558670193 | DRAFT_00861 | Metacyc        | PWY-6126: adenosine nucleotides <i>de novo</i> biosynthesis         |          |
| 2558670193 | DRAFT_00861 | Metacyc        | PWY-6123: inosine-5'-phosphate biosynthesis I                       |          |
| 2558670193 | DRAFT_00861 | COG_category   | [F] Nucleotide transport and metabolism                             |          |
| 2558670193 | DRAFT_00861 | COG0015        | Adenylosuccinate lyase                                              | 6.00E-60 |
| 2558670193 | DRAFT_00861 | pfam08328      | ASL_C                                                               | 1.80E-20 |
| 2558670193 | DRAFT_00861 | pfam00206      | Lyase_1                                                             | 4.20E-31 |
| 2558670193 | DRAFT_00861 | EC:4.3.2.2     | Adenylosuccinate lyase.                                             |          |
| 2558670193 | DRAFT_00861 | KO:K01756      | adenylosuccinate lyase [EC:4.3.2.2]                                 | 0.00E+00 |
| 2558670193 | DRAFT_00861 | Locus_type     | CDS                                                                 |          |
| 2558670193 | DRAFT_00861 | Product_name   | Adenylosuccinate lyase                                              |          |
| 2558670193 | DRAFT_00861 | Scaffold       | DRAFT_contig_70_80_len_38341_read_count_650701.13                   |          |
| 2558670193 | DRAFT_00861 | Coordinates    | 32583..33866(-)                                                     |          |
| 2558670193 | DRAFT_00861 | DNA_length     | 1284bp                                                              |          |
| 2558670193 | DRAFT_00861 | Protein_length | 427aa                                                               |          |
| 2558670193 | DRAFT_00861 | GC             |                                                                     | 0.58     |



|            |             |                |                                                               |           |
|------------|-------------|----------------|---------------------------------------------------------------|-----------|
| 2558670194 | DRAFT_00862 | KEGG_module    | M00049: Adenine ribonucleotide biosynthesis, IMP => ADP,ATP   |           |
| 2558670194 | DRAFT_00862 | Metacyc        | PWY-6126: adenosine nucleotides <i>de novo</i> biosynthesis   |           |
| 2558670194 | DRAFT_00862 | Metacyc        | PWY-841: purine nucleotides <i>de novo</i> biosynthesis II    |           |
| 2558670194 | DRAFT_00862 | IMG_pathway    | 236: AMP anabolism via adenylosuccinate                       |           |
| 2558670194 | DRAFT_00862 | COG_category   | [F] Nucleotide transport and metabolism                       |           |
| 2558670194 | DRAFT_00862 | COG0104        | Adenylosuccinate synthase                                     | 2.00E-122 |
| 2558670194 | DRAFT_00862 | pfam00709      | Adenylsucc_synt                                               | 3.20E-124 |
| 2558670194 | DRAFT_00862 | EC:6.3.4.4     | Adenylosuccinate synthase.                                    |           |
| 2558670194 | DRAFT_00862 | TIGR00184      | adenylosuccinate synthase                                     | 1.40E-120 |
| 2558670194 | DRAFT_00862 | KO:K01939      | adenylosuccinate synthase [EC:6.3.4.4]                        | 0.00E+00  |
| 2558670194 | DRAFT_00862 | ITERM:00630    | Adenylosuccinate synthetase (EC 6.3.4.4)                      |           |
| 2558670194 | DRAFT_00862 | Locus_type     | CDS                                                           |           |
| 2558670194 | DRAFT_00862 | Product_name   | Adenylosuccinate synthetase (EC 6.3.4.4)                      |           |
| 2558670194 | DRAFT_00862 | Scaffold       | DRAFT_contig_70_80_len_38341_read_count_650701.13             |           |
| 2558670194 | DRAFT_00862 | Coordinates    | 33856..35070(-)                                               |           |
| 2558670194 | DRAFT_00862 | DNA_length     | 1215bp                                                        |           |
| 2558670194 | DRAFT_00862 | Protein_length | 404aa                                                         |           |
| 2558670194 | DRAFT_00862 | GC             |                                                               | 0.61      |
| 2558670195 | DRAFT_00863 | KEGG_module    | M00050: Guanine ribonucleotide biosynthesis IMP => GDP,GTP    |           |
| 2558670195 | DRAFT_00863 | Metacyc        | PWY-5695: urate biosynthesis/inosine 5'-phosphate degradation |           |
| 2558670195 | DRAFT_00863 | Metacyc        | PWY-6596: adenosine nucleotides degradation I                 |           |
| 2558670195 | DRAFT_00863 | Metacyc        | PWY-6125: guanosine nucleotides <i>de novo</i> biosynthesis   |           |
| 2558670195 | DRAFT_00863 | Metacyc        | PWY-841: purine nucleotides <i>de novo</i> biosynthesis II    |           |
| 2558670195 | DRAFT_00863 | COG_category   | [F] Nucleotide transport and metabolism                       |           |
| 2558670195 | DRAFT_00863 | COG0516        | IMP dehydrogenase/GMP reductase                               | 2.00E-24  |
| 2558670195 | DRAFT_00863 | pfam00571      | CBS                                                           | 1.10E-08  |
| 2558670195 | DRAFT_00863 | pfam00571      | CBS                                                           | 2.70E-08  |
| 2558670195 | DRAFT_00863 | pfam00478      | IMPDH                                                         | 0.00E+00  |
| 2558670195 | DRAFT_00863 | EC:1.1.1.205   | IMP dehydrogenase.                                            |           |
| 2558670195 | DRAFT_00863 | TIGR01302      | inosine-5'-monophosphate dehydrogenase                        | 0.00E+00  |
| 2558670195 | DRAFT_00863 | KO:K00088      | IMP dehydrogenase [EC:1.1.1.205]                              | 0.00E+00  |
| 2558670195 | DRAFT_00863 | Locus_type     | CDS                                                           |           |
| 2558670195 | DRAFT_00863 | Product_name   | inosine-5'-monophosphate dehydrogenase                        |           |

|            |             |                |                            |                                                   |          |
|------------|-------------|----------------|----------------------------|---------------------------------------------------|----------|
| 2558670195 | DRAFT_00863 | Scaffold       |                            | DRAFT_contig_70_80_len_38341_read_count_650701.13 |          |
| 2558670195 | DRAFT_00863 | Coordinates    |                            | 35072..36547(-)                                   |          |
| 2558670195 | DRAFT_00863 | DNA_length     |                            | 1476bp                                            |          |
| 2558670195 | DRAFT_00863 | Protein_length |                            | 491aa                                             |          |
| 2558670195 | DRAFT_00863 | GC             |                            |                                                   | 0.58     |
|            |             |                |                            |                                                   |          |
| 2558670196 | DRAFT_00864 | Locus_type     |                            | tRNA                                              |          |
| 2558670196 | DRAFT_00864 | Product_name   |                            | tRNA_Undet_???                                    |          |
| 2558670196 | DRAFT_00864 | Scaffold       |                            | DRAFT_contig_70_80_len_38341_read_count_650701.13 |          |
| 2558670196 | DRAFT_00864 | Coordinates    |                            | 36634..36750(-)                                   |          |
| 2558670196 | DRAFT_00864 | DNA_length     |                            | 117bp                                             |          |
| 2558670196 | DRAFT_00864 | GC             |                            |                                                   | 0.66     |
|            |             |                |                            |                                                   |          |
| 2558670197 | DRAFT_00865 | Locus_type     |                            | CDS                                               |          |
| 2558670197 | DRAFT_00865 | Product_name   |                            | hypothetical protein                              |          |
| 2558670197 | DRAFT_00865 | Scaffold       |                            | DRAFT_contig_70_80_len_38341_read_count_650701.13 |          |
| 2558670197 | DRAFT_00865 | Coordinates    |                            | 36911..37759(-)                                   |          |
| 2558670197 | DRAFT_00865 | DNA_length     |                            | 849bp                                             |          |
| 2558670197 | DRAFT_00865 | Protein_length |                            | 282aa                                             |          |
| 2558670197 | DRAFT_00865 | GC             |                            |                                                   | 0.59     |
| 2558670197 | DRAFT_00865 | Transmembrane  |                            | Yes                                               |          |
|            |             |                |                            |                                                   |          |
| 2558670198 | DRAFT_00866 | pfam12730      | ABC2_membrane_4            |                                                   | 1.60E-07 |
| 2558670198 | DRAFT_00866 | Locus_type     |                            | CDS                                               |          |
| 2558670198 | DRAFT_00866 | Product_name   |                            | ABC-2 family transporter protein                  |          |
| 2558670198 | DRAFT_00866 | Scaffold       |                            | DRAFT_contig_70_80_len_38341_read_count_650701.13 |          |
| 2558670198 | DRAFT_00866 | Coordinates    |                            | 37759..38340(-)                                   |          |
| 2558670198 | DRAFT_00866 | DNA_length     |                            | 582bp                                             |          |
| 2558670198 | DRAFT_00866 | Protein_length |                            | 193aa                                             |          |
| 2558670198 | DRAFT_00866 | GC             |                            |                                                   | 0.63     |
| 2558670198 | DRAFT_00866 | Transmembrane  |                            | Yes                                               |          |
|            |             |                |                            |                                                   |          |
| 2558670199 | DRAFT_00867 | COG_category   | [S] Function unknown       |                                                   |          |
| 2558670199 | DRAFT_00867 | COG3371        | Predicted membrane protein |                                                   | 2.00E-03 |

|            |             |                |                                                                        |                                                                       |          |
|------------|-------------|----------------|------------------------------------------------------------------------|-----------------------------------------------------------------------|----------|
| 2558670199 | DRAFT_00867 | pfam06197      | DUF998                                                                 |                                                                       | 6.20E-13 |
| 2558670199 | DRAFT_00867 | Locus_type     |                                                                        | CDS                                                                   |          |
| 2558670199 | DRAFT_00867 | Product_name   |                                                                        | Predicted membrane protein                                            |          |
| 2558670199 | DRAFT_00867 | Scaffold       |                                                                        | DRAFT_contig_70_81_len_37990_read_count_630184.14                     |          |
| 2558670199 | DRAFT_00867 | Coordinates    |                                                                        | 237..917(+)                                                           |          |
| 2558670199 | DRAFT_00867 | DNA_length     |                                                                        | 681bp                                                                 |          |
| 2558670199 | DRAFT_00867 | Protein_length |                                                                        | 226aa                                                                 |          |
| 2558670199 | DRAFT_00867 | GC             |                                                                        |                                                                       | 0.57     |
| 2558670199 | DRAFT_00867 | Transmembrane  |                                                                        | Yes                                                                   |          |
| 2558670200 | DRAFT_00868 | COG_category   | [R] General function prediction only                                   |                                                                       |          |
| 2558670200 | DRAFT_00868 | COG0596        | Predicted hydrolases or acyltransferases (alpha/beta hydrolase superfa |                                                                       | 2.00E-30 |
| 2558670200 | DRAFT_00868 | pfam12697      | Abhydrolase_6                                                          |                                                                       | 5.90E-37 |
| 2558670200 | DRAFT_00868 | Locus_type     |                                                                        | CDS                                                                   |          |
| 2558670200 | DRAFT_00868 | Product_name   |                                                                        | Predicted hydrolases or acyltransferases (alpha/beta hydrolase superi |          |
| 2558670200 | DRAFT_00868 | Scaffold       |                                                                        | DRAFT_contig_70_81_len_37990_read_count_630184.14                     |          |
| 2558670200 | DRAFT_00868 | Coordinates    |                                                                        | 1043..1885(+)                                                         |          |
| 2558670200 | DRAFT_00868 | DNA_length     |                                                                        | 843bp                                                                 |          |
| 2558670200 | DRAFT_00868 | Protein_length |                                                                        | 280aa                                                                 |          |
| 2558670200 | DRAFT_00868 | GC             |                                                                        |                                                                       | 0.57     |
| 2558670201 | DRAFT_00869 | COG_category   | [R] General function prediction only                                   |                                                                       |          |
| 2558670201 | DRAFT_00869 | COG0596        | Predicted hydrolases or acyltransferases (alpha/beta hydrolase superfa |                                                                       | 2.00E-32 |
| 2558670201 | DRAFT_00869 | pfam12697      | Abhydrolase_6                                                          |                                                                       | 2.10E-37 |
| 2558670201 | DRAFT_00869 | Locus_type     |                                                                        | CDS                                                                   |          |
| 2558670201 | DRAFT_00869 | Product_name   |                                                                        | Predicted hydrolases or acyltransferases (alpha/beta hydrolase superi |          |
| 2558670201 | DRAFT_00869 | Scaffold       |                                                                        | DRAFT_contig_70_81_len_37990_read_count_630184.14                     |          |
| 2558670201 | DRAFT_00869 | Coordinates    |                                                                        | 2037..2837(-)                                                         |          |
| 2558670201 | DRAFT_00869 | DNA_length     |                                                                        | 801bp                                                                 |          |
| 2558670201 | DRAFT_00869 | Protein_length |                                                                        | 266aa                                                                 |          |
| 2558670201 | DRAFT_00869 | GC             |                                                                        |                                                                       | 0.52     |
| 2558670202 | DRAFT_00870 | Locus_type     |                                                                        | CDS                                                                   |          |
| 2558670202 | DRAFT_00870 | Product_name   |                                                                        | hypothetical protein                                                  |          |

|            |             |                |                                                     |           |
|------------|-------------|----------------|-----------------------------------------------------|-----------|
| 2558670202 | DRAFT_00870 | Scaffold       | DRAFT_contig_70_81_len_37990_read_count_630184.14   |           |
| 2558670202 | DRAFT_00870 | Coordinates    | 3192..3566(-)                                       |           |
| 2558670202 | DRAFT_00870 | DNA_length     | 375bp                                               |           |
| 2558670202 | DRAFT_00870 | Protein_length | 124aa                                               |           |
| 2558670202 | DRAFT_00870 | GC             |                                                     | 0.48      |
| 2558670203 | DRAFT_00871 | Locus_type     | CDS                                                 |           |
| 2558670203 | DRAFT_00871 | Product_name   | hypothetical protein                                |           |
| 2558670203 | DRAFT_00871 | Scaffold       | DRAFT_contig_70_81_len_37990_read_count_630184.14   |           |
| 2558670203 | DRAFT_00871 | Coordinates    | 3599..3931(-)                                       |           |
| 2558670203 | DRAFT_00871 | DNA_length     | 333bp                                               |           |
| 2558670203 | DRAFT_00871 | Protein_length | 110aa                                               |           |
| 2558670203 | DRAFT_00871 | GC             |                                                     | 0.6       |
| 2558670204 | DRAFT_00872 | COG_category   | [K] Transcription                                   |           |
| 2558670204 | DRAFT_00872 | COG0195        | Transcription elongation factor                     | 3.00E-07  |
| 2558670204 | DRAFT_00872 | Locus_type     | CDS                                                 |           |
| 2558670204 | DRAFT_00872 | Product_name   | Transcription elongation factor                     |           |
| 2558670204 | DRAFT_00872 | Scaffold       | DRAFT_contig_70_81_len_37990_read_count_630184.14   |           |
| 2558670204 | DRAFT_00872 | Coordinates    | 3977..4513(+)                                       |           |
| 2558670204 | DRAFT_00872 | DNA_length     | 537bp                                               |           |
| 2558670204 | DRAFT_00872 | Protein_length | 178aa                                               |           |
| 2558670204 | DRAFT_00872 | GC             |                                                     | 0.61      |
| 2558670205 | DRAFT_00873 | KEGG_module    | M00360: Aminoacyl-tRNA biosynthesis, prokaryotes    |           |
| 2558670205 | DRAFT_00873 | KEGG_module    | M00359: Aminoacyl-tRNA biosynthesis, eukaryotes     |           |
| 2558670205 | DRAFT_00873 | Metacyc        | TRNA-CHARGING-PWY: tRNA charging                    |           |
| 2558670205 | DRAFT_00873 | COG_category   | [J] Translation, ribosomal structure and biogenesis |           |
| 2558670205 | DRAFT_00873 | COG0017        | Aspartyl/asparaginyl-tRNA synthetases               | 5.00E-113 |
| 2558670205 | DRAFT_00873 | pfam00152      | tRNA-synt_2                                         | 9.60E-72  |
| 2558670205 | DRAFT_00873 | pfam01336      | tRNA_anti-codon                                     | 2.40E-11  |
| 2558670205 | DRAFT_00873 | EC:6.1.1.12    | Aspartate--tRNA ligase.                             |           |
| 2558670205 | DRAFT_00873 | TIGR00458      | nondiscriminating aspartyl-tRNA synthetase          | 2.30E-128 |
| 2558670205 | DRAFT_00873 | KO:K01876      | aspartyl-tRNA synthetase [EC:6.1.1.12]              | 0.00E+00  |

|            |             |                |                                           |                                                   |          |
|------------|-------------|----------------|-------------------------------------------|---------------------------------------------------|----------|
| 2558670205 | DRAFT_00873 | Locus_type     |                                           | CDS                                               |          |
| 2558670205 | DRAFT_00873 | Product_name   |                                           | nondiscriminating aspartyl-tRNA synthetase        |          |
| 2558670205 | DRAFT_00873 | Scaffold       |                                           | DRAFT_contig_70_81_len_37990_read_count_630184.14 |          |
| 2558670205 | DRAFT_00873 | Coordinates    |                                           | 4510..5823(-)                                     |          |
| 2558670205 | DRAFT_00873 | DNA_length     |                                           | 1314bp                                            |          |
| 2558670205 | DRAFT_00873 | Protein_length |                                           | 437aa                                             |          |
| 2558670205 | DRAFT_00873 | GC             |                                           |                                                   | 0.6      |
|            |             |                |                                           |                                                   |          |
| 2558670206 | DRAFT_00874 | pfam04212      | MIT                                       |                                                   | 4.80E-09 |
| 2558670206 | DRAFT_00874 | pfam00004      | AAA                                       |                                                   | 1.70E-36 |
| 2558670206 | DRAFT_00874 | Locus_type     |                                           | CDS                                               |          |
| 2558670206 | DRAFT_00874 | Product_name   |                                           | ATPases of the AAA+ class                         |          |
| 2558670206 | DRAFT_00874 | Scaffold       |                                           | DRAFT_contig_70_81_len_37990_read_count_630184.14 |          |
| 2558670206 | DRAFT_00874 | Coordinates    |                                           | 5856..7076(-)                                     |          |
| 2558670206 | DRAFT_00874 | DNA_length     |                                           | 1221bp                                            |          |
| 2558670206 | DRAFT_00874 | Protein_length |                                           | 406aa                                             |          |
| 2558670206 | DRAFT_00874 | GC             |                                           |                                                   | 0.6      |
|            |             |                |                                           |                                                   |          |
| 2558670207 | DRAFT_00875 | COG_category   | [N] Cell motility                         |                                                   |          |
| 2558670207 | DRAFT_00875 | COG5491        | Conserved protein implicated in secretion |                                                   | 5.00E-07 |
| 2558670207 | DRAFT_00875 | pfam03357      | Snf7                                      |                                                   | 1.10E-05 |
| 2558670207 | DRAFT_00875 | Locus_type     |                                           | CDS                                               |          |
| 2558670207 | DRAFT_00875 | Product_name   |                                           | Conserved protein implicated in secretion         |          |
| 2558670207 | DRAFT_00875 | Scaffold       |                                           | DRAFT_contig_70_81_len_37990_read_count_630184.14 |          |
| 2558670207 | DRAFT_00875 | Coordinates    |                                           | 7073..7936(-)                                     |          |
| 2558670207 | DRAFT_00875 | DNA_length     |                                           | 864bp                                             |          |
| 2558670207 | DRAFT_00875 | Protein_length |                                           | 287aa                                             |          |
| 2558670207 | DRAFT_00875 | GC             |                                           |                                                   | 0.6      |
|            |             |                |                                           |                                                   |          |
| 2558670208 | DRAFT_00876 | COG_category   | [N] Cell motility                         |                                                   |          |
| 2558670208 | DRAFT_00876 | COG5491        | Conserved protein implicated in secretion |                                                   | 5.00E-16 |
| 2558670208 | DRAFT_00876 | Locus_type     |                                           | CDS                                               |          |
| 2558670208 | DRAFT_00876 | Product_name   |                                           | Conserved protein implicated in secretion         |          |
| 2558670208 | DRAFT_00876 | Scaffold       |                                           | DRAFT_contig_70_81_len_37990_read_count_630184.14 |          |

|            |             |                |                                                                       |           |
|------------|-------------|----------------|-----------------------------------------------------------------------|-----------|
| 2558670208 | DRAFT_00876 | Coordinates    | 8152..8802(-)                                                         |           |
| 2558670208 | DRAFT_00876 | DNA_length     | 651bp                                                                 |           |
| 2558670208 | DRAFT_00876 | Protein_length | 216aa                                                                 |           |
| 2558670208 | DRAFT_00876 | GC             |                                                                       | 0.55      |
| 2558670209 | DRAFT_00877 | KEGG_module    | M00360: Aminoacyl-tRNA biosynthesis, prokaryotes                      |           |
| 2558670209 | DRAFT_00877 | KEGG_module    | M00359: Aminoacyl-tRNA biosynthesis, eukaryotes                       |           |
| 2558670209 | DRAFT_00877 | Metacyc        | TRNA-CHARGING-PWY: tRNA charging                                      |           |
| 2558670209 | DRAFT_00877 | COG_category   | [J] Translation, ribosomal structure and biogenesis                   |           |
| 2558670209 | DRAFT_00877 | COG0060        | Isoleucyl-tRNA synthetase                                             | 0.00E+00  |
| 2558670209 | DRAFT_00877 | pfam08264      | Anticodon_1                                                           | 7.50E-29  |
| 2558670209 | DRAFT_00877 | pfam00133      | tRNA-synt_1                                                           | 6.20E-107 |
| 2558670209 | DRAFT_00877 | pfam00133      | tRNA-synt_1                                                           | 1.80E-25  |
| 2558670209 | DRAFT_00877 | EC:6.1.1.5     | Isoleucine--tRNA ligase.                                              |           |
| 2558670209 | DRAFT_00877 | TIGR00392      | isoleucyl-tRNA synthetase                                             | 0.00E+00  |
| 2558670209 | DRAFT_00877 | KO:K01870      | isoleucyl-tRNA synthetase [EC:6.1.1.5]                                | 0.00E+00  |
| 2558670209 | DRAFT_00877 | Locus_type     | CDS                                                                   |           |
| 2558670209 | DRAFT_00877 | Product_name   | Isoleucyl-tRNA synthetase (EC 6.1.1.5)                                |           |
| 2558670209 | DRAFT_00877 | Scaffold       | DRAFT_contig_70_81_len_37990_read_count_630184.14                     |           |
| 2558670209 | DRAFT_00877 | Coordinates    | 9144..12497(+)                                                        |           |
| 2558670209 | DRAFT_00877 | DNA_length     | 3354bp                                                                |           |
| 2558670209 | DRAFT_00877 | Protein_length | 1117aa                                                                |           |
| 2558670209 | DRAFT_00877 | GC             |                                                                       | 0.5       |
| 2558670210 | DRAFT_00878 | COG_category   | [J] Translation, ribosomal structure and biogenesis                   |           |
| 2558670210 | DRAFT_00878 | COG1236        | Predicted exonuclease of the beta-lactamase fold involved in RNA proc | 9.00E-19  |
| 2558670210 | DRAFT_00878 | KO:K07577      | putative mRNA 3-end processing factor                                 | 0.00E+00  |
| 2558670210 | DRAFT_00878 | Locus_type     | CDS                                                                   |           |
| 2558670210 | DRAFT_00878 | Product_name   | Predicted exonuclease of the beta-lactamase fold involved in RNA proc |           |
| 2558670210 | DRAFT_00878 | Scaffold       | DRAFT_contig_70_81_len_37990_read_count_630184.14                     |           |
| 2558670210 | DRAFT_00878 | Coordinates    | 12850..13911(-)                                                       |           |
| 2558670210 | DRAFT_00878 | DNA_length     | 1062bp                                                                |           |
| 2558670210 | DRAFT_00878 | Protein_length | 353aa                                                                 |           |
| 2558670210 | DRAFT_00878 | GC             |                                                                       | 0.61      |

|            |             |                |                                                     |           |
|------------|-------------|----------------|-----------------------------------------------------|-----------|
| 2558670211 | DRAFT_00879 | Locus_type     | CDS                                                 |           |
| 2558670211 | DRAFT_00879 | Product_name   | hypothetical protein                                |           |
| 2558670211 | DRAFT_00879 | Scaffold       | DRAFT_contig_70_81_len_37990_read_count_630184.14   |           |
| 2558670211 | DRAFT_00879 | Coordinates    | 13881..16196(-)                                     |           |
| 2558670211 | DRAFT_00879 | DNA_length     | 2316bp                                              |           |
| 2558670211 | DRAFT_00879 | Protein_length | 771aa                                               |           |
| 2558670211 | DRAFT_00879 | GC             |                                                     | 0.64      |
|            |             |                |                                                     |           |
| 2558670212 | DRAFT_00880 | KEGG_module    | M00360: Aminoacyl-tRNA biosynthesis, prokaryotes    |           |
| 2558670212 | DRAFT_00880 | KEGG_module    | M00359: Aminoacyl-tRNA biosynthesis, eukaryotes     |           |
| 2558670212 | DRAFT_00880 | Metacyc        | TRNA-CHARGING-PWY: tRNA charging                    |           |
| 2558670212 | DRAFT_00880 | IMG_pathway    | 488: L-cysteine ligation to tRNA(Cys)               |           |
| 2558670212 | DRAFT_00880 | COG_category   | [J] Translation, ribosomal structure and biogenesis |           |
| 2558670212 | DRAFT_00880 | COG0215        | Cysteinyl-tRNA synthetase                           | 0.00E+00  |
| 2558670212 | DRAFT_00880 | pfam09190      | DALR_2                                              | 3.30E-13  |
| 2558670212 | DRAFT_00880 | pfam01406      | tRNA-synt_1e                                        | 8.70E-104 |
| 2558670212 | DRAFT_00880 | EC:6.1.1.16    | Cysteine--tRNA ligase.                              |           |
| 2558670212 | DRAFT_00880 | TIGR00435      | cysteinyl-tRNA synthetase                           | 0.00E+00  |
| 2558670212 | DRAFT_00880 | KO:K01883      | cysteinyl-tRNA synthetase [EC:6.1.1.16]             | 0.00E+00  |
| 2558670212 | DRAFT_00880 | ITERM:00404    | cysteinyl-tRNA synthetase (EC 6.1.1.16)             |           |
| 2558670212 | DRAFT_00880 | Locus_type     | CDS                                                 |           |
| 2558670212 | DRAFT_00880 | Product_name   | cysteinyl-tRNA synthetase (EC 6.1.1.16)             |           |
| 2558670212 | DRAFT_00880 | Scaffold       | DRAFT_contig_70_81_len_37990_read_count_630184.14   |           |
| 2558670212 | DRAFT_00880 | Coordinates    | 16268..17668(-)                                     |           |
| 2558670212 | DRAFT_00880 | DNA_length     | 1401bp                                              |           |
| 2558670212 | DRAFT_00880 | Protein_length | 466aa                                               |           |
| 2558670212 | DRAFT_00880 | GC             |                                                     | 0.6       |
|            |             |                |                                                     |           |
| 2558670213 | DRAFT_00881 | Locus_type     | CDS                                                 |           |
| 2558670213 | DRAFT_00881 | Product_name   | hypothetical protein                                |           |
| 2558670213 | DRAFT_00881 | Scaffold       | DRAFT_contig_70_81_len_37990_read_count_630184.14   |           |
| 2558670213 | DRAFT_00881 | Coordinates    | 17725..17874(-)                                     |           |
| 2558670213 | DRAFT_00881 | DNA_length     | 150bp                                               |           |

|            |             |                |                                                                   |          |
|------------|-------------|----------------|-------------------------------------------------------------------|----------|
| 2558670213 | DRAFT_00881 | Protein_length | 49aa                                                              |          |
| 2558670213 | DRAFT_00881 | GC             |                                                                   | 0.48     |
| 2558670214 | DRAFT_00882 | Locus_type     | tRNA                                                              |          |
| 2558670214 | DRAFT_00882 | Product_name   | tRNA_Cys_GCA                                                      |          |
| 2558670214 | DRAFT_00882 | Scaffold       | DRAFT_contig_70_81_len_37990_read_count_630184.14                 |          |
| 2558670214 | DRAFT_00882 | Coordinates    | 18367..18453(+)                                                   |          |
| 2558670214 | DRAFT_00882 | DNA_length     | 74bp                                                              |          |
| 2558670214 | DRAFT_00882 | GC             |                                                                   | 0.66     |
| 2558670215 | DRAFT_00883 | COG_category   | [C] Energy production and conversion                              |          |
| 2558670215 | DRAFT_00883 | COG3808        | Inorganic pyrophosphatase                                         | 0.00E+00 |
| 2558670215 | DRAFT_00883 | pfam03030      | H_PPase                                                           | 0.00E+00 |
| 2558670215 | DRAFT_00883 | EC:3.6.1.1     | Inorganic diphosphatase.                                          |          |
| 2558670215 | DRAFT_00883 | TIGR01104      | vacuolar-type H(+)-translocating pyrophosphatase                  | 0.00E+00 |
| 2558670215 | DRAFT_00883 | KO:K15987      | K(+)-stimulated pyrophosphate-energized sodium pump [EC:3.6.1.1]  | 0.00E+00 |
| 2558670215 | DRAFT_00883 | Locus_type     | CDS                                                               |          |
| 2558670215 | DRAFT_00883 | Product_name   | vacuolar-type H(+)-translocating pyrophosphatase                  |          |
| 2558670215 | DRAFT_00883 | Scaffold       | DRAFT_contig_70_81_len_37990_read_count_630184.14                 |          |
| 2558670215 | DRAFT_00883 | Coordinates    | 18529..20775(+)                                                   |          |
| 2558670215 | DRAFT_00883 | DNA_length     | 2247bp                                                            |          |
| 2558670215 | DRAFT_00883 | Protein_length | 748aa                                                             |          |
| 2558670215 | DRAFT_00883 | GC             |                                                                   | 0.58     |
| 2558670215 | DRAFT_00883 | Transmembrane  | Yes                                                               |          |
| 2558670216 | DRAFT_00884 | KEGG_module    | M00153: Cytochrome d ubiquinol oxidase                            |          |
| 2558670216 | DRAFT_00884 | Metacyc        | PWY-6824: justicidin B biosynthesis                               |          |
| 2558670216 | DRAFT_00884 | Metacyc        | PWY-5466: matairesinol biosynthesis                               |          |
| 2558670216 | DRAFT_00884 | Metacyc        | PWY-5404: betaxanthin biosynthesis (via dopaxanthin)              |          |
| 2558670216 | DRAFT_00884 | Metacyc        | PWY-5439: betacyanin biosynthesis (via dopamine)                  |          |
| 2558670216 | DRAFT_00884 | Metacyc        | PWY-5787: oligomeric urushiol biosynthesis                        |          |
| 2558670216 | DRAFT_00884 | Metacyc        | PWY-6498: eumelanin biosynthesis                                  |          |
| 2558670216 | DRAFT_00884 | Metacyc        | PWY0-1334: NADH to cytochrome <i>bd</i> oxidase electron transfer |          |
| 2558670216 | DRAFT_00884 | Metacyc        | PWY-5476: cornusiin E biosynthesis                                |          |



|            |             |                |                                                                                             |
|------------|-------------|----------------|---------------------------------------------------------------------------------------------|
| 2558670216 | DRAFT_00884 | Metacyc        | PWY0-1353: succinate to cytochrome <i>bd</i> oxidase electron transfer                      |
| 2558670216 | DRAFT_00884 | COG_category   | [C] Energy production and conversion                                                        |
| 2558670216 | DRAFT_00884 | COG1271        | Cytochrome <i>bd</i> -type quinol oxidase, subunit 1                                        |
| 2558670216 | DRAFT_00884 | pfam01654      | Bac_Ubq_Cox                                                                                 |
| 2558670216 | DRAFT_00884 | EC:1.10.3.-    | Oxidoreductases. Acting on diphenols and related substances as donors. With oxygen as accep |
| 2558670216 | DRAFT_00884 | KO:K00425      | cytochrome d ubiquinol oxidase subunit I [EC:1.10.3.-]                                      |
| 2558670216 | DRAFT_00884 | ITERM:06137    | cytochrome <i>bd</i> -I ubiquinol oxidase subunit 1 apoprotein (EC 1.10.3.10)               |
| 2558670216 | DRAFT_00884 | Locus_type     | CDS                                                                                         |
| 2558670216 | DRAFT_00884 | Product_name   | cytochrome <i>bd</i> -I ubiquinol oxidase subunit 1 apoprotein (EC 1.10.3.10)               |
| 2558670216 | DRAFT_00884 | Scaffold       | DRAFT_contig_70_81_len_37990_read_count_630184.14                                           |
| 2558670216 | DRAFT_00884 | Coordinates    | 20890..22233(+)                                                                             |
| 2558670216 | DRAFT_00884 | DNA_length     | 1344bp                                                                                      |
| 2558670216 | DRAFT_00884 | Protein_length | 447aa                                                                                       |
| 2558670216 | DRAFT_00884 | GC             | 0.56                                                                                        |
| 2558670216 | DRAFT_00884 | Transmembrane  | Yes                                                                                         |
| 2558670217 | DRAFT_00885 | KEGG_module    | M00153: Cytochrome d ubiquinol oxidase                                                      |
| 2558670217 | DRAFT_00885 | Metacyc        | PWY0-1353: succinate to cytochrome <i>bd</i> oxidase electron transfer                      |
| 2558670217 | DRAFT_00885 | Metacyc        | PWY-6824: justicidin B biosynthesis                                                         |
| 2558670217 | DRAFT_00885 | Metacyc        | PWY-5404: betaxanthin biosynthesis (via dopaxanthin)                                        |
| 2558670217 | DRAFT_00885 | Metacyc        | PWY-5787: oligomeric urushiol biosynthesis                                                  |
| 2558670217 | DRAFT_00885 | Metacyc        | PWY-5476: cornusiin E biosynthesis                                                          |
| 2558670217 | DRAFT_00885 | Metacyc        | PWY-5466: matairesinol biosynthesis                                                         |
| 2558670217 | DRAFT_00885 | Metacyc        | PWY-5439: betacyanin biosynthesis (via dopamine)                                            |
| 2558670217 | DRAFT_00885 | Metacyc        | PWY-6498: eumelanin biosynthesis                                                            |
| 2558670217 | DRAFT_00885 | Metacyc        | PWY0-1334: NADH to cytochrome <i>bd</i> oxidase electron transfer                           |
| 2558670217 | DRAFT_00885 | EC:1.10.3.-    | Oxidoreductases. Acting on diphenols and related substances as donors. With oxygen as accep |
| 2558670217 | DRAFT_00885 | KO:K00426      | cytochrome d ubiquinol oxidase subunit II [EC:1.10.3.-]                                     |
| 2558670217 | DRAFT_00885 | Locus_type     | CDS                                                                                         |
| 2558670217 | DRAFT_00885 | Product_name   | hypothetical protein                                                                        |
| 2558670217 | DRAFT_00885 | Scaffold       | DRAFT_contig_70_81_len_37990_read_count_630184.14                                           |
| 2558670217 | DRAFT_00885 | Coordinates    | 22237..23187(+)                                                                             |
| 2558670217 | DRAFT_00885 | DNA_length     | 951bp                                                                                       |
| 2558670217 | DRAFT_00885 | Protein_length | 316aa                                                                                       |

|            |             |                |                                                                                     |          |
|------------|-------------|----------------|-------------------------------------------------------------------------------------|----------|
| 2558670217 | DRAFT_00885 | GC             |                                                                                     | 0.56     |
| 2558670217 | DRAFT_00885 | Transmembrane  | Yes                                                                                 |          |
| 2558670218 | DRAFT_00886 | Locus_type     | CDS                                                                                 |          |
| 2558670218 | DRAFT_00886 | Product_name   | hypothetical protein                                                                |          |
| 2558670218 | DRAFT_00886 | Scaffold       | DRAFT_contig_70_81_len_37990_read_count_630184.14                                   |          |
| 2558670218 | DRAFT_00886 | Coordinates    | 23127..23345(-)                                                                     |          |
| 2558670218 | DRAFT_00886 | DNA_length     | 219bp                                                                               |          |
| 2558670218 | DRAFT_00886 | Protein_length | 72aa                                                                                |          |
| 2558670218 | DRAFT_00886 | GC             |                                                                                     | 0.56     |
| 2558670219 | DRAFT_00887 | Metacyc        | PWY-5905: hypusine biosynthesis                                                     |          |
| 2558670219 | DRAFT_00887 | COG_category   | [O] Posttranslational modification, protein turnover, chaperones                    |          |
| 2558670219 | DRAFT_00887 | COG1899        | Deoxyhypusine synthase                                                              | 5.00E-92 |
| 2558670219 | DRAFT_00887 | pfam01916      | DS                                                                                  | 6.90E-83 |
| 2558670219 | DRAFT_00887 | EC:2.5.1.46    | Deoxyhypusine synthase.                                                             |          |
| 2558670219 | DRAFT_00887 | TIGR00321      | deoxyhypusine synthase                                                              | 1.50E-85 |
| 2558670219 | DRAFT_00887 | KO:K00809      | deoxyhypusine synthase [EC:2.5.1.46]                                                | 0.00E+00 |
| 2558670219 | DRAFT_00887 | Locus_type     | CDS                                                                                 |          |
| 2558670219 | DRAFT_00887 | Product_name   | deoxyhypusine synthase (EC 2.5.1.46)                                                |          |
| 2558670219 | DRAFT_00887 | Scaffold       | DRAFT_contig_70_81_len_37990_read_count_630184.14                                   |          |
| 2558670219 | DRAFT_00887 | Coordinates    | 23354..24319(-)                                                                     |          |
| 2558670219 | DRAFT_00887 | DNA_length     | 966bp                                                                               |          |
| 2558670219 | DRAFT_00887 | Protein_length | 321aa                                                                               |          |
| 2558670219 | DRAFT_00887 | GC             |                                                                                     | 0.6      |
| 2558670220 | DRAFT_00888 | KEGG_module    | M00053: Pyrimidine deoxyribonucleotide biosynthesis, CDP/CTP => dCDP/dCTP,dTDP/dTTP |          |
| 2558670220 | DRAFT_00888 | COG_category   | [F] Nucleotide transport and metabolism                                             |          |
| 2558670220 | DRAFT_00888 | COG0125        | Thymidylate kinase                                                                  | 2.00E-21 |
| 2558670220 | DRAFT_00888 | pfam02223      | Thymidylate_kin                                                                     | 9.00E-27 |
| 2558670220 | DRAFT_00888 | EC:2.7.4.9     | dTMP kinase.                                                                        |          |
| 2558670220 | DRAFT_00888 | KO:K00943      | dTMP kinase [EC:2.7.4.9]                                                            | 1.40E-32 |
| 2558670220 | DRAFT_00888 | Locus_type     | CDS                                                                                 |          |
| 2558670220 | DRAFT_00888 | Product_name   | Thymidylate kinase                                                                  |          |

|            |             |                |                                                             |          |
|------------|-------------|----------------|-------------------------------------------------------------|----------|
| 2558670220 | DRAFT_00888 | Scaffold       | DRAFT_contig_70_81_len_37990_read_count_630184.14           |          |
| 2558670220 | DRAFT_00888 | Coordinates    | 24349..24933(-)                                             |          |
| 2558670220 | DRAFT_00888 | DNA_length     | 585bp                                                       |          |
| 2558670220 | DRAFT_00888 | Protein_length | 194aa                                                       |          |
| 2558670220 | DRAFT_00888 | GC             |                                                             | 0.56     |
| 2558670220 | DRAFT_00888 | Transmembrane  | Yes                                                         |          |
| 2558670221 | DRAFT_00889 | COG_category   | [I] Lipid transport and metabolism                          |          |
| 2558670221 | DRAFT_00889 | COG0170        | Dolichol kinase                                             | 5.00E-13 |
| 2558670221 | DRAFT_00889 | pfam01148      | CTP_transf_1                                                | 5.70E-06 |
| 2558670221 | DRAFT_00889 | Locus_type     | CDS                                                         |          |
| 2558670221 | DRAFT_00889 | Product_name   | Dolichol kinase                                             |          |
| 2558670221 | DRAFT_00889 | Scaffold       | DRAFT_contig_70_81_len_37990_read_count_630184.14           |          |
| 2558670221 | DRAFT_00889 | Coordinates    | 24947..25669(-)                                             |          |
| 2558670221 | DRAFT_00889 | DNA_length     | 723bp                                                       |          |
| 2558670221 | DRAFT_00889 | Protein_length | 240aa                                                       |          |
| 2558670221 | DRAFT_00889 | GC             |                                                             | 0.54     |
| 2558670221 | DRAFT_00889 | Transmembrane  | Yes                                                         |          |
| 2558670222 | DRAFT_00890 | COG_category   | [R] General function prediction only                        |          |
| 2558670222 | DRAFT_00890 | COG1719        | Predicted hydrocarbon binding protein (contains V4R domain) | 1.00E-07 |
| 2558670222 | DRAFT_00890 | pfam02830      | V4R                                                         | 3.00E-11 |
| 2558670222 | DRAFT_00890 | Locus_type     | CDS                                                         |          |
| 2558670222 | DRAFT_00890 | Product_name   | Predicted hydrocarbon binding protein (contains V4R domain) |          |
| 2558670222 | DRAFT_00890 | Scaffold       | DRAFT_contig_70_81_len_37990_read_count_630184.14           |          |
| 2558670222 | DRAFT_00890 | Coordinates    | 25874..26656(-)                                             |          |
| 2558670222 | DRAFT_00890 | DNA_length     | 783bp                                                       |          |
| 2558670222 | DRAFT_00890 | Protein_length | 260aa                                                       |          |
| 2558670222 | DRAFT_00890 | GC             |                                                             | 0.55     |
| 2558670223 | DRAFT_00891 | KEGG_module    | M00248: Putative antibiotic transport system                |          |
| 2558670223 | DRAFT_00891 | pfam01061      | ABC2_membrane                                               | 3.30E-16 |
| 2558670223 | DRAFT_00891 | KO:K09686      | antibiotic transport system permease protein                | 0.00E+00 |
| 2558670223 | DRAFT_00891 | Locus_type     | CDS                                                         |          |

|            |             |                |                                                       |          |
|------------|-------------|----------------|-------------------------------------------------------|----------|
| 2558670223 | DRAFT_00891 | Product_name   | Predicted membrane protein                            |          |
| 2558670223 | DRAFT_00891 | Scaffold       | DRAFT_contig_70_81_len_37990_read_count_630184.14     |          |
| 2558670223 | DRAFT_00891 | Coordinates    | 26789..27556(-)                                       |          |
| 2558670223 | DRAFT_00891 | DNA_length     | 768bp                                                 |          |
| 2558670223 | DRAFT_00891 | Protein_length | 255aa                                                 |          |
| 2558670223 | DRAFT_00891 | GC             |                                                       | 0.56     |
| 2558670223 | DRAFT_00891 | Transmembrane  | Yes                                                   |          |
| 2558670224 | DRAFT_00892 | KEGG_module    | M00254: ABC-2 type transport system                   |          |
| 2558670224 | DRAFT_00892 | COG_category   | [V] Defense mechanisms                                |          |
| 2558670224 | DRAFT_00892 | COG1131        | ABC-type multidrug transport system, ATPase component | 2.00E-67 |
| 2558670224 | DRAFT_00892 | pfam00005      | ABC_tran                                              | 4.10E-30 |
| 2558670224 | DRAFT_00892 | KO:K01990      | ABC-2 type transport system ATP-binding protein       | 0.00E+00 |
| 2558670224 | DRAFT_00892 | Locus_type     | CDS                                                   |          |
| 2558670224 | DRAFT_00892 | Product_name   | ABC-type multidrug transport system, ATPase component |          |
| 2558670224 | DRAFT_00892 | Scaffold       | DRAFT_contig_70_81_len_37990_read_count_630184.14     |          |
| 2558670224 | DRAFT_00892 | Coordinates    | 27561..28520(-)                                       |          |
| 2558670224 | DRAFT_00892 | DNA_length     | 960bp                                                 |          |
| 2558670224 | DRAFT_00892 | Protein_length | 319aa                                                 |          |
| 2558670224 | DRAFT_00892 | GC             |                                                       | 0.56     |
| 2558670225 | DRAFT_00893 | Locus_type     | CDS                                                   |          |
| 2558670225 | DRAFT_00893 | Product_name   | hypothetical protein                                  |          |
| 2558670225 | DRAFT_00893 | Scaffold       | DRAFT_contig_70_81_len_37990_read_count_630184.14     |          |
| 2558670225 | DRAFT_00893 | Coordinates    | 28558..29898(-)                                       |          |
| 2558670225 | DRAFT_00893 | DNA_length     | 1341bp                                                |          |
| 2558670225 | DRAFT_00893 | Protein_length | 446aa                                                 |          |
| 2558670225 | DRAFT_00893 | GC             |                                                       | 0.59     |
| 2558670225 | DRAFT_00893 | Transmembrane  | Yes                                                   |          |
| 2558670226 | DRAFT_00894 | pfam01022      | HTH_5                                                 | 2.20E-10 |
| 2558670226 | DRAFT_00894 | Locus_type     | CDS                                                   |          |
| 2558670226 | DRAFT_00894 | Product_name   | Bacterial regulatory protein, arsR family             |          |
| 2558670226 | DRAFT_00894 | Scaffold       | DRAFT_contig_70_81_len_37990_read_count_630184.14     |          |

|            |             |                |                                                                  |          |
|------------|-------------|----------------|------------------------------------------------------------------|----------|
| 2558670226 | DRAFT_00894 | Coordinates    | 29891..30454(-)                                                  |          |
| 2558670226 | DRAFT_00894 | DNA_length     | 564bp                                                            |          |
| 2558670226 | DRAFT_00894 | Protein_length | 187aa                                                            |          |
| 2558670226 | DRAFT_00894 | GC             |                                                                  | 0.6      |
| 2558670227 | DRAFT_00895 | COG_category   | [F] Nucleotide transport and metabolism                          |          |
| 2558670227 | DRAFT_00895 | COG1936        | Predicted nucleotide kinase (related to CMP and AMP kinases)     | 5.00E-24 |
| 2558670227 | DRAFT_00895 | pfam13238      | AAA_18                                                           | 8.00E-17 |
| 2558670227 | DRAFT_00895 | Locus_type     | CDS                                                              |          |
| 2558670227 | DRAFT_00895 | Product_name   | Predicted nucleotide kinase (related to CMP and AMP kinases)     |          |
| 2558670227 | DRAFT_00895 | Scaffold       | DRAFT_contig_70_81_len_37990_read_count_630184.14                |          |
| 2558670227 | DRAFT_00895 | Coordinates    | 30683..31264(-)                                                  |          |
| 2558670227 | DRAFT_00895 | DNA_length     | 582bp                                                            |          |
| 2558670227 | DRAFT_00895 | Protein_length | 193aa                                                            |          |
| 2558670227 | DRAFT_00895 | GC             |                                                                  | 0.6      |
| 2558670228 | DRAFT_00896 | COG_category   | [O] Posttranslational modification, protein turnover, chaperones |          |
| 2558670228 | DRAFT_00896 | COG0225        | Peptide methionine sulfoxide reductase                           | 2.00E-62 |
| 2558670228 | DRAFT_00896 | pfam01625      | PMSR                                                             | 2.90E-63 |
| 2558670228 | DRAFT_00896 | EC:1.8.4.11    | Peptide-methionine (S)-S-oxide reductase.                        |          |
| 2558670228 | DRAFT_00896 | TIGR00401      | methionine-S-sulfoxide reductase                                 | 7.50E-64 |
| 2558670228 | DRAFT_00896 | KO:K07304      | peptide-methionine (S)-S-oxide reductase [EC:1.8.4.11]           | 0.00E+00 |
| 2558670228 | DRAFT_00896 | Locus_type     | CDS                                                              |          |
| 2558670228 | DRAFT_00896 | Product_name   | methionine-S-sulfoxide reductase                                 |          |
| 2558670228 | DRAFT_00896 | Scaffold       | DRAFT_contig_70_81_len_37990_read_count_630184.14                |          |
| 2558670228 | DRAFT_00896 | Coordinates    | 31285..31848(-)                                                  |          |
| 2558670228 | DRAFT_00896 | DNA_length     | 564bp                                                            |          |
| 2558670228 | DRAFT_00896 | Protein_length | 187aa                                                            |          |
| 2558670228 | DRAFT_00896 | GC             |                                                                  | 0.6      |
| 2558670229 | DRAFT_00897 | Locus_type     | CDS                                                              |          |
| 2558670229 | DRAFT_00897 | Product_name   | hypothetical protein                                             |          |
| 2558670229 | DRAFT_00897 | Scaffold       | DRAFT_contig_70_81_len_37990_read_count_630184.14                |          |
| 2558670229 | DRAFT_00897 | Coordinates    | 32052..32204(+)                                                  |          |

|            |             |                |                                                           |           |
|------------|-------------|----------------|-----------------------------------------------------------|-----------|
| 2558670229 | DRAFT_00897 | DNA_length     | 153bp                                                     |           |
| 2558670229 | DRAFT_00897 | Protein_length | 50aa                                                      |           |
| 2558670229 | DRAFT_00897 | GC             |                                                           | 0.54      |
| 2558670229 | DRAFT_00897 | Transmembrane  | Yes                                                       |           |
| 2558670230 | DRAFT_00898 | COG_category   | [H] Coenzyme transport and metabolism                     |           |
| 2558670230 | DRAFT_00898 | COG2226        | Methylase involved in ubiquinone/menaquinone biosynthesis | 2.00E-11  |
| 2558670230 | DRAFT_00898 | pfam08241      | Methyltransf_11                                           | 1.80E-14  |
| 2558670230 | DRAFT_00898 | Locus_type     | CDS                                                       |           |
| 2558670230 | DRAFT_00898 | Product_name   | Methylase involved in ubiquinone/menaquinone biosynthesis |           |
| 2558670230 | DRAFT_00898 | Scaffold       | DRAFT_contig_70_81_len_37990_read_count_630184.14         |           |
| 2558670230 | DRAFT_00898 | Coordinates    | 32256..33206(-)                                           |           |
| 2558670230 | DRAFT_00898 | DNA_length     | 951bp                                                     |           |
| 2558670230 | DRAFT_00898 | Protein_length | 316aa                                                     |           |
| 2558670230 | DRAFT_00898 | GC             |                                                           | 0.51      |
| 2558670231 | DRAFT_00899 | pfam00082      | Peptidase_S8                                              | 2.30E-06  |
| 2558670231 | DRAFT_00899 | Locus_type     | CDS                                                       |           |
| 2558670231 | DRAFT_00899 | Product_name   | Predicted protease                                        |           |
| 2558670231 | DRAFT_00899 | Scaffold       | DRAFT_contig_70_81_len_37990_read_count_630184.14         |           |
| 2558670231 | DRAFT_00899 | Coordinates    | 33387..34862(-)                                           |           |
| 2558670231 | DRAFT_00899 | DNA_length     | 1476bp                                                    |           |
| 2558670231 | DRAFT_00899 | Protein_length | 491aa                                                     |           |
| 2558670231 | DRAFT_00899 | GC             |                                                           | 0.52      |
| 2558670231 | DRAFT_00899 | Transmembrane  | Yes                                                       |           |
| 2558670232 | DRAFT_00900 | COG_category   | [E] Amino acid transport and metabolism                   |           |
| 2558670232 | DRAFT_00900 | COG1506        | Dipeptidyl aminopeptidases/acylaminoacyl-peptidases       | 3.00E-105 |
| 2558670232 | DRAFT_00900 | pfam00326      | Peptidase_S9                                              | 8.70E-54  |
| 2558670232 | DRAFT_00900 | pfam10647      | Gmad1                                                     | 1.20E-05  |
| 2558670232 | DRAFT_00900 | Locus_type     | CDS                                                       |           |
| 2558670232 | DRAFT_00900 | Product_name   | Dipeptidyl aminopeptidases/acylaminoacyl-peptidases       |           |
| 2558670232 | DRAFT_00900 | Scaffold       | DRAFT_contig_70_81_len_37990_read_count_630184.14         |           |
| 2558670232 | DRAFT_00900 | Coordinates    | 35038..36855(-)                                           |           |

|            |             |                |                                                           |          |
|------------|-------------|----------------|-----------------------------------------------------------|----------|
| 2558670232 | DRAFT_00900 | DNA_length     | 1818bp                                                    |          |
| 2558670232 | DRAFT_00900 | Protein_length | 605aa                                                     |          |
| 2558670232 | DRAFT_00900 | GC             |                                                           | 0.59     |
| 2558670233 | DRAFT_00901 | pfam13229      | Beta_helix                                                | 2.50E-17 |
| 2558670233 | DRAFT_00901 | TIGR03804      | parallel beta-helix repeat (two copies)                   | 9.60E-14 |
| 2558670233 | DRAFT_00901 | Locus_type     | CDS                                                       |          |
| 2558670233 | DRAFT_00901 | Product_name   | parallel beta-helix repeat (two copies)                   |          |
| 2558670233 | DRAFT_00901 | Scaffold       | DRAFT_contig_70_81_len_37990_read_count_630184.14         |          |
| 2558670233 | DRAFT_00901 | Coordinates    | 37202..37987(+)                                           |          |
| 2558670233 | DRAFT_00901 | DNA_length     | 786bp                                                     |          |
| 2558670233 | DRAFT_00901 | Protein_length | 262aa                                                     |          |
| 2558670233 | DRAFT_00901 | GC             |                                                           | 0.54     |
| 2558670233 | DRAFT_00901 | Transmembrane  | Yes                                                       |          |
| 2558670234 | DRAFT_00902 | Locus_type     | CDS                                                       |          |
| 2558670234 | DRAFT_00902 | Product_name   | hypothetical protein                                      |          |
| 2558670234 | DRAFT_00902 | Scaffold       | DRAFT_contig_70_88_len_36701_read_count_592636.15         |          |
| 2558670234 | DRAFT_00902 | Coordinates    | 294..503(-)                                               |          |
| 2558670234 | DRAFT_00902 | DNA_length     | 210bp                                                     |          |
| 2558670234 | DRAFT_00902 | Protein_length | 69aa                                                      |          |
| 2558670234 | DRAFT_00902 | GC             |                                                           | 0.48     |
| 2558670234 | DRAFT_00902 | Transmembrane  | Yes                                                       |          |
| 2558670235 | DRAFT_00903 | KEGG_module    | M00020: Serine biosynthesis, glycerate-3P => serine       |          |
| 2558670235 | DRAFT_00903 | Metacyc        | SERSYN-PWY: serine biosynthesis                           |          |
| 2558670235 | DRAFT_00903 | COG_category   | [H] Coenzyme transport and metabolism                     |          |
| 2558670235 | DRAFT_00903 | COG_category   | [E] Amino acid transport and metabolism                   |          |
| 2558670235 | DRAFT_00903 | COG0111        | Phosphoglycerate dehydrogenase and related dehydrogenases | 5.00E-40 |
| 2558670235 | DRAFT_00903 | pfam02826      | 2-Hacid_dh_C                                              | 3.40E-30 |
| 2558670235 | DRAFT_00903 | pfam00389      | 2-Hacid_dh                                                | 2.40E-10 |
| 2558670235 | DRAFT_00903 | EC:1.1.1.95    | Phosphoglycerate dehydrogenase.                           |          |
| 2558670235 | DRAFT_00903 | KO:K00058      | D-3-phosphoglycerate dehydrogenase [EC:1.1.1.95]          | 0.00E+00 |
| 2558670235 | DRAFT_00903 | Locus_type     | CDS                                                       |          |

|            |             |                |                                                           |          |
|------------|-------------|----------------|-----------------------------------------------------------|----------|
| 2558670235 | DRAFT_00903 | Product_name   | Phosphoglycerate dehydrogenase and related dehydrogenases |          |
| 2558670235 | DRAFT_00903 | Scaffold       | DRAFT_contig_70_88_len_36701_read_count_592636.15         |          |
| 2558670235 | DRAFT_00903 | Coordinates    | 646..1572(-)                                              |          |
| 2558670235 | DRAFT_00903 | DNA_length     | 927bp                                                     |          |
| 2558670235 | DRAFT_00903 | Protein_length | 308aa                                                     |          |
| 2558670235 | DRAFT_00903 | GC             |                                                           | 0.58     |
|            |             |                |                                                           |          |
| 2558670236 | DRAFT_00904 | COG_category   | [K] Transcription                                         |          |
| 2558670236 | DRAFT_00904 | COG1758        | DNA-directed RNA polymerase, subunit K/omega              | 6.00E-09 |
| 2558670236 | DRAFT_00904 | pfam01192      | RNA_pol_Rpb6                                              | 4.00E-11 |
| 2558670236 | DRAFT_00904 | Locus_type     | CDS                                                       |          |
| 2558670236 | DRAFT_00904 | Product_name   | DNA-directed RNA polymerase, subunit K/omega              |          |
| 2558670236 | DRAFT_00904 | Scaffold       | DRAFT_contig_70_88_len_36701_read_count_592636.15         |          |
| 2558670236 | DRAFT_00904 | Coordinates    | 1589..1879(-)                                             |          |
| 2558670236 | DRAFT_00904 | DNA_length     | 291bp                                                     |          |
| 2558670236 | DRAFT_00904 | Protein_length | 96aa                                                      |          |
| 2558670236 | DRAFT_00904 | GC             |                                                           | 0.55     |
|            |             |                |                                                           |          |
| 2558670237 | DRAFT_00905 | COG_category   | [S] Function unknown                                      |          |
| 2558670237 | DRAFT_00905 | COG2164        | Uncharacterized conserved protein                         | 3.00E-07 |
| 2558670237 | DRAFT_00905 | pfam04126      | Cyclophil_like                                            | 1.50E-05 |
| 2558670237 | DRAFT_00905 | KO:K09143      | hypothetical protein                                      | 9.20E-12 |
| 2558670237 | DRAFT_00905 | Locus_type     | CDS                                                       |          |
| 2558670237 | DRAFT_00905 | Product_name   | Uncharacterized conserved protein                         |          |
| 2558670237 | DRAFT_00905 | Scaffold       | DRAFT_contig_70_88_len_36701_read_count_592636.15         |          |
| 2558670237 | DRAFT_00905 | Coordinates    | 1981..2388(+)                                             |          |
| 2558670237 | DRAFT_00905 | DNA_length     | 408bp                                                     |          |
| 2558670237 | DRAFT_00905 | Protein_length | 135aa                                                     |          |
| 2558670237 | DRAFT_00905 | GC             |                                                           | 0.61     |
|            |             |                |                                                           |          |
| 2558670238 | DRAFT_00906 | Locus_type     | CDS                                                       |          |
| 2558670238 | DRAFT_00906 | Product_name   | hypothetical protein                                      |          |
| 2558670238 | DRAFT_00906 | Scaffold       | DRAFT_contig_70_88_len_36701_read_count_592636.15         |          |
| 2558670238 | DRAFT_00906 | Coordinates    | 2526..2876(-)                                             |          |



|            |             |                |                                                                 |          |
|------------|-------------|----------------|-----------------------------------------------------------------|----------|
| 2558670238 | DRAFT_00906 | DNA_length     | 351bp                                                           |          |
| 2558670238 | DRAFT_00906 | Protein_length | 116aa                                                           |          |
| 2558670238 | DRAFT_00906 | GC             |                                                                 | 0.59     |
| 2558670239 | DRAFT_00907 | COG_category   | [T] Signal transduction mechanisms                              |          |
| 2558670239 | DRAFT_00907 | COG2114        | Adenylate cyclase, family 3 (some proteins contain HAMP domain) | 4.00E-27 |
| 2558670239 | DRAFT_00907 | pfam00211      | Guanylate_cyc                                                   | 6.00E-24 |
| 2558670239 | DRAFT_00907 | Locus_type     | CDS                                                             |          |
| 2558670239 | DRAFT_00907 | Product_name   | Adenylate cyclase, family 3 (some proteins contain HAMP domain) |          |
| 2558670239 | DRAFT_00907 | Scaffold       | DRAFT_contig_70_88_len_36701_read_count_592636.15               |          |
| 2558670239 | DRAFT_00907 | Coordinates    | 2998..4662(-)                                                   |          |
| 2558670239 | DRAFT_00907 | DNA_length     | 1665bp                                                          |          |
| 2558670239 | DRAFT_00907 | Protein_length | 554aa                                                           |          |
| 2558670239 | DRAFT_00907 | GC             |                                                                 | 0.57     |
| 2558670240 | DRAFT_00908 | Locus_type     | CDS                                                             |          |
| 2558670240 | DRAFT_00908 | Product_name   | hypothetical protein                                            |          |
| 2558670240 | DRAFT_00908 | Scaffold       | DRAFT_contig_70_88_len_36701_read_count_592636.15               |          |
| 2558670240 | DRAFT_00908 | Coordinates    | 4911..6131(+)                                                   |          |
| 2558670240 | DRAFT_00908 | DNA_length     | 1221bp                                                          |          |
| 2558670240 | DRAFT_00908 | Protein_length | 406aa                                                           |          |
| 2558670240 | DRAFT_00908 | GC             |                                                                 | 0.6      |
| 2558670240 | DRAFT_00908 | Transmembrane  | Yes                                                             |          |
| 2558670241 | DRAFT_00909 | Metacyc        | PWY-5386: methylglyoxal degradation I                           |          |
| 2558670241 | DRAFT_00909 | COG_category   | [E] Amino acid transport and metabolism                         |          |
| 2558670241 | DRAFT_00909 | COG0346        | Lactoylglutathione lyase and related lyases                     | 2.00E-09 |
| 2558670241 | DRAFT_00909 | pfam12681      | Glyoxalase_2                                                    | 5.10E-17 |
| 2558670241 | DRAFT_00909 | EC:4.4.1.5     | Lactoylglutathione lyase.                                       |          |
| 2558670241 | DRAFT_00909 | TIGR00068      | lactoylglutathione lyase                                        | 5.00E-24 |
| 2558670241 | DRAFT_00909 | KO:K01759      | lactoylglutathione lyase [EC:4.4.1.5]                           | 2.10E-12 |
| 2558670241 | DRAFT_00909 | Locus_type     | CDS                                                             |          |
| 2558670241 | DRAFT_00909 | Product_name   | Lactoylglutathione lyase and related lyases                     |          |
| 2558670241 | DRAFT_00909 | Scaffold       | DRAFT_contig_70_88_len_36701_read_count_592636.15               |          |

|            |             |                |                                                   |          |
|------------|-------------|----------------|---------------------------------------------------|----------|
| 2558670241 | DRAFT_00909 | Coordinates    | 6404..6793(+)                                     |          |
| 2558670241 | DRAFT_00909 | DNA_length     | 390bp                                             |          |
| 2558670241 | DRAFT_00909 | Protein_length | 129aa                                             |          |
| 2558670241 | DRAFT_00909 | GC             |                                                   | 0.52     |
|            |             |                |                                                   |          |
| 2558670242 | DRAFT_00910 | Locus_type     | CDS                                               |          |
| 2558670242 | DRAFT_00910 | Product_name   | hypothetical protein                              |          |
| 2558670242 | DRAFT_00910 | Scaffold       | DRAFT_contig_70_88_len_36701_read_count_592636.15 |          |
| 2558670242 | DRAFT_00910 | Coordinates    | 6951..7478(-)                                     |          |
| 2558670242 | DRAFT_00910 | DNA_length     | 528bp                                             |          |
| 2558670242 | DRAFT_00910 | Protein_length | 175aa                                             |          |
| 2558670242 | DRAFT_00910 | GC             |                                                   | 0.56     |
| 2558670242 | DRAFT_00910 | Transmembrane  | Yes                                               |          |
|            |             |                |                                                   |          |
| 2558670243 | DRAFT_00911 | Locus_type     | CDS                                               |          |
| 2558670243 | DRAFT_00911 | Product_name   | hypothetical protein                              |          |
| 2558670243 | DRAFT_00911 | Scaffold       | DRAFT_contig_70_88_len_36701_read_count_592636.15 |          |
| 2558670243 | DRAFT_00911 | Coordinates    | 7609..7764(-)                                     |          |
| 2558670243 | DRAFT_00911 | DNA_length     | 156bp                                             |          |
| 2558670243 | DRAFT_00911 | Protein_length | 51aa                                              |          |
| 2558670243 | DRAFT_00911 | GC             |                                                   | 0.56     |
|            |             |                |                                                   |          |
| 2558670244 | DRAFT_00912 | COG_category   | [L] Replication, recombination and repair         |          |
| 2558670244 | DRAFT_00912 | COG1793        | ATP-dependent DNA ligase                          | 9.00E-81 |
| 2558670244 | DRAFT_00912 | pfam04679      | DNA_ligase_A_C                                    | 5.30E-22 |
| 2558670244 | DRAFT_00912 | pfam01068      | DNA_ligase_A_M                                    | 5.50E-48 |
| 2558670244 | DRAFT_00912 | pfam04675      | DNA_ligase_A_N                                    | 1.50E-41 |
| 2558670244 | DRAFT_00912 | EC:6.5.1.1     | DNA ligase (ATP).                                 |          |
| 2558670244 | DRAFT_00912 | TIGR00574      | DNA ligase I, ATP-dependent (dnl1)                | 0.00E+00 |
| 2558670244 | DRAFT_00912 | KO:K10747      | DNA ligase 1 [EC:6.5.1.1]                         | 0.00E+00 |
| 2558670244 | DRAFT_00912 | Locus_type     | CDS                                               |          |
| 2558670244 | DRAFT_00912 | Product_name   | DNA ligase I, ATP-dependent (dnl1)                |          |
| 2558670244 | DRAFT_00912 | Scaffold       | DRAFT_contig_70_88_len_36701_read_count_592636.15 |          |
| 2558670244 | DRAFT_00912 | Coordinates    | 7774..9528(+)                                     |          |

|            |             |                |                                                                            |          |
|------------|-------------|----------------|----------------------------------------------------------------------------|----------|
| 2558670244 | DRAFT_00912 | DNA_length     | 1755bp                                                                     |          |
| 2558670244 | DRAFT_00912 | Protein_length | 584aa                                                                      |          |
| 2558670244 | DRAFT_00912 | GC             |                                                                            | 0.58     |
| 2558670245 | DRAFT_00913 | COG_category   | [O] Posttranslational modification, protein turnover, chaperones           |          |
| 2558670245 | DRAFT_00913 | COG0265        | Trypsin-like serine proteases, typically periplasmic, contain C-terminal I | 1.00E-38 |
| 2558670245 | DRAFT_00913 | pfam13180      | PDZ_2                                                                      | 8.40E-12 |
| 2558670245 | DRAFT_00913 | pfam13365      | Trypsin_2                                                                  | 2.20E-17 |
| 2558670245 | DRAFT_00913 | EC:1.3.1.74    | 2-alkenal reductase.                                                       |          |
| 2558670245 | DRAFT_00913 | KO:K08070      | 2-alkenal reductase [EC:1.3.1.74]                                          | 0.00E+00 |
| 2558670245 | DRAFT_00913 | Locus_type     | CDS                                                                        |          |
| 2558670245 | DRAFT_00913 | Product_name   | Trypsin-like serine proteases, typically periplasmic, contain C-termina    |          |
| 2558670245 | DRAFT_00913 | Scaffold       | DRAFT_contig_70_88_len_36701_read_count_592636.15                          |          |
| 2558670245 | DRAFT_00913 | Coordinates    | 9749..10960(+)                                                             |          |
| 2558670245 | DRAFT_00913 | DNA_length     | 1212bp                                                                     |          |
| 2558670245 | DRAFT_00913 | Protein_length | 403aa                                                                      |          |
| 2558670245 | DRAFT_00913 | GC             |                                                                            | 0.56     |
| 2558670245 | DRAFT_00913 | Transmembrane  | Yes                                                                        |          |
| 2558670246 | DRAFT_00914 | COG_category   | [O] Posttranslational modification, protein turnover, chaperones           |          |
| 2558670246 | DRAFT_00914 | COG1030        | Membrane-bound serine protease (ClpP class)                                | 3.00E-51 |
| 2558670246 | DRAFT_00914 | pfam01957      | NfeD                                                                       | 1.50E-22 |
| 2558670246 | DRAFT_00914 | KO:K07403      | membrane-bound serine protease (ClpP class)                                | 0.00E+00 |
| 2558670246 | DRAFT_00914 | Locus_type     | CDS                                                                        |          |
| 2558670246 | DRAFT_00914 | Product_name   | Membrane-bound serine protease (ClpP class)                                |          |
| 2558670246 | DRAFT_00914 | Scaffold       | DRAFT_contig_70_88_len_36701_read_count_592636.15                          |          |
| 2558670246 | DRAFT_00914 | Coordinates    | 11095..12420(+)                                                            |          |
| 2558670246 | DRAFT_00914 | DNA_length     | 1326bp                                                                     |          |
| 2558670246 | DRAFT_00914 | Protein_length | 441aa                                                                      |          |
| 2558670246 | DRAFT_00914 | GC             |                                                                            | 0.57     |
| 2558670246 | DRAFT_00914 | Signal_peptide | Yes                                                                        |          |
| 2558670246 | DRAFT_00914 | Transmembrane  | Yes                                                                        |          |
| 2558670247 | DRAFT_00915 | COG_category   | [O] Posttranslational modification, protein turnover, chaperones           |          |

|            |             |                |                                                          |          |
|------------|-------------|----------------|----------------------------------------------------------|----------|
| 2558670247 | DRAFT_00915 | COG0330        | Membrane protease subunits, stomatin/prohibitin homologs | 7.00E-39 |
| 2558670247 | DRAFT_00915 | pfam01145      | Band_7                                                   | 2.40E-33 |
| 2558670247 | DRAFT_00915 | Locus_type     | CDS                                                      |          |
| 2558670247 | DRAFT_00915 | Product_name   | SPFH domain, Band 7 family protein                       |          |
| 2558670247 | DRAFT_00915 | Scaffold       | DRAFT_contig_70_88_len_36701_read_count_592636.15        |          |
| 2558670247 | DRAFT_00915 | Coordinates    | 12417..13322(+)                                          |          |
| 2558670247 | DRAFT_00915 | DNA_length     | 906bp                                                    |          |
| 2558670247 | DRAFT_00915 | Protein_length | 301aa                                                    |          |
| 2558670247 | DRAFT_00915 | GC             |                                                          | 0.57     |
| 2558670247 | DRAFT_00915 | Transmembrane  | Yes                                                      |          |
| 2558670248 | DRAFT_00916 | pfam00583      | Acetyltransf_1                                           | 1.20E-13 |
| 2558670248 | DRAFT_00916 | Locus_type     | CDS                                                      |          |
| 2558670248 | DRAFT_00916 | Product_name   | Acetyltransferases                                       |          |
| 2558670248 | DRAFT_00916 | Scaffold       | DRAFT_contig_70_88_len_36701_read_count_592636.15        |          |
| 2558670248 | DRAFT_00916 | Coordinates    | 13376..13819(+)                                          |          |
| 2558670248 | DRAFT_00916 | DNA_length     | 444bp                                                    |          |
| 2558670248 | DRAFT_00916 | Protein_length | 147aa                                                    |          |
| 2558670248 | DRAFT_00916 | GC             |                                                          | 0.48     |
| 2558670249 | DRAFT_00917 | Locus_type     | CDS                                                      |          |
| 2558670249 | DRAFT_00917 | Product_name   | hypothetical protein                                     |          |
| 2558670249 | DRAFT_00917 | Scaffold       | DRAFT_contig_70_88_len_36701_read_count_592636.15        |          |
| 2558670249 | DRAFT_00917 | Coordinates    | 14036..14305(+)                                          |          |
| 2558670249 | DRAFT_00917 | DNA_length     | 270bp                                                    |          |
| 2558670249 | DRAFT_00917 | Protein_length | 89aa                                                     |          |
| 2558670249 | DRAFT_00917 | GC             |                                                          | 0.51     |
| 2558670249 | DRAFT_00917 | Transmembrane  | Yes                                                      |          |
| 2558670250 | DRAFT_00918 | Locus_type     | CDS                                                      |          |
| 2558670250 | DRAFT_00918 | Product_name   | hypothetical protein                                     |          |
| 2558670250 | DRAFT_00918 | Scaffold       | DRAFT_contig_70_88_len_36701_read_count_592636.15        |          |
| 2558670250 | DRAFT_00918 | Coordinates    | 14702..15220(-)                                          |          |
| 2558670250 | DRAFT_00918 | DNA_length     | 519bp                                                    |          |

|            |             |                |                                                   |      |
|------------|-------------|----------------|---------------------------------------------------|------|
| 2558670250 | DRAFT_00918 | Protein_length | 172aa                                             |      |
| 2558670250 | DRAFT_00918 | GC             |                                                   | 0.52 |
| 2558670251 | DRAFT_00919 | Locus_type     | CDS                                               |      |
| 2558670251 | DRAFT_00919 | Product_name   | hypothetical protein                              |      |
| 2558670251 | DRAFT_00919 | Scaffold       | DRAFT_contig_70_88_len_36701_read_count_592636.15 |      |
| 2558670251 | DRAFT_00919 | Coordinates    | 15342..15686(+)                                   |      |
| 2558670251 | DRAFT_00919 | DNA_length     | 345bp                                             |      |
| 2558670251 | DRAFT_00919 | Protein_length | 114aa                                             |      |
| 2558670251 | DRAFT_00919 | GC             |                                                   | 0.55 |
| 2558670252 | DRAFT_00920 | Locus_type     | CDS                                               |      |
| 2558670252 | DRAFT_00920 | Product_name   | hypothetical protein                              |      |
| 2558670252 | DRAFT_00920 | Scaffold       | DRAFT_contig_70_88_len_36701_read_count_592636.15 |      |
| 2558670252 | DRAFT_00920 | Coordinates    | 15736..15945(-)                                   |      |
| 2558670252 | DRAFT_00920 | DNA_length     | 210bp                                             |      |
| 2558670252 | DRAFT_00920 | Protein_length | 69aa                                              |      |
| 2558670252 | DRAFT_00920 | GC             |                                                   | 0.5  |
| 2558670252 | DRAFT_00920 | Transmembrane  | Yes                                               |      |
| 2558670253 | DRAFT_00921 | Locus_type     | CDS                                               |      |
| 2558670253 | DRAFT_00921 | Product_name   | hypothetical protein                              |      |
| 2558670253 | DRAFT_00921 | Scaffold       | DRAFT_contig_70_88_len_36701_read_count_592636.15 |      |
| 2558670253 | DRAFT_00921 | Coordinates    | 16158..16565(+)                                   |      |
| 2558670253 | DRAFT_00921 | DNA_length     | 408bp                                             |      |
| 2558670253 | DRAFT_00921 | Protein_length | 135aa                                             |      |
| 2558670253 | DRAFT_00921 | GC             |                                                   | 0.48 |
| 2558670254 | DRAFT_00922 | Locus_type     | CDS                                               |      |
| 2558670254 | DRAFT_00922 | Product_name   | hypothetical protein                              |      |
| 2558670254 | DRAFT_00922 | Scaffold       | DRAFT_contig_70_88_len_36701_read_count_592636.15 |      |
| 2558670254 | DRAFT_00922 | Coordinates    | 16798..16917(+)                                   |      |
| 2558670254 | DRAFT_00922 | DNA_length     | 120bp                                             |      |
| 2558670254 | DRAFT_00922 | Protein_length | 39aa                                              |      |

|            |             |                |                                                         |          |
|------------|-------------|----------------|---------------------------------------------------------|----------|
| 2558670254 | DRAFT_00922 | GC             |                                                         | 0.54     |
| 2558670255 | DRAFT_00923 | Locus_type     | CDS                                                     |          |
| 2558670255 | DRAFT_00923 | Product_name   | hypothetical protein                                    |          |
| 2558670255 | DRAFT_00923 | Scaffold       | DRAFT_contig_70_88_len_36701_read_count_592636.15       |          |
| 2558670255 | DRAFT_00923 | Coordinates    | 17037..17252(-)                                         |          |
| 2558670255 | DRAFT_00923 | DNA_length     | 216bp                                                   |          |
| 2558670255 | DRAFT_00923 | Protein_length | 71aa                                                    |          |
| 2558670255 | DRAFT_00923 | GC             |                                                         | 0.56     |
| 2558670256 | DRAFT_00924 | COG_category   | [P] Inorganic ion transport and metabolism              |          |
| 2558670256 | DRAFT_00924 | COG1392        | Phosphate transport regulator (distant homolog of PhoU) | 1.00E-05 |
| 2558670256 | DRAFT_00924 | pfam01865      | PhoU_div                                                | 3.70E-10 |
| 2558670256 | DRAFT_00924 | KO:K07220      | hypothetical protein                                    | 1.20E-36 |
| 2558670256 | DRAFT_00924 | Locus_type     | CDS                                                     |          |
| 2558670256 | DRAFT_00924 | Product_name   | Phosphate transport regulator (distant homolog of PhoU) |          |
| 2558670256 | DRAFT_00924 | Scaffold       | DRAFT_contig_70_88_len_36701_read_count_592636.15       |          |
| 2558670256 | DRAFT_00924 | Coordinates    | 17480..18070(+)                                         |          |
| 2558670256 | DRAFT_00924 | DNA_length     | 591bp                                                   |          |
| 2558670256 | DRAFT_00924 | Protein_length | 196aa                                                   |          |
| 2558670256 | DRAFT_00924 | GC             |                                                         | 0.56     |
| 2558670257 | DRAFT_00925 | Metacyc        | PWY-6689: tRNA splicing                                 |          |
| 2558670257 | DRAFT_00925 | COG_category   | [J] Translation, ribosomal structure and biogenesis     |          |
| 2558670257 | DRAFT_00925 | COG1676        | tRNA splicing endonuclease                              | 2.00E-26 |
| 2558670257 | DRAFT_00925 | pfam02778      | tRNA_int_endo_N                                         | 1.40E-15 |
| 2558670257 | DRAFT_00925 | pfam01974      | tRNA_int_endo                                           | 1.80E-26 |
| 2558670257 | DRAFT_00925 | EC:3.1.27.9    | tRNA-intron endonuclease.                               |          |
| 2558670257 | DRAFT_00925 | TIGR00324      | tRNA-intron endonuclease                                | 2.20E-28 |
| 2558670257 | DRAFT_00925 | KO:K01170      | tRNA-intron endonuclease, archaea type [EC:3.1.27.9]    | 0.00E+00 |
| 2558670257 | DRAFT_00925 | Locus_type     | CDS                                                     |          |
| 2558670257 | DRAFT_00925 | Product_name   | tRNA-intron endonuclease                                |          |
| 2558670257 | DRAFT_00925 | Scaffold       | DRAFT_contig_70_88_len_36701_read_count_592636.15       |          |
| 2558670257 | DRAFT_00925 | Coordinates    | 18073..18630(+)                                         |          |

|            |             |                |                                                                     |          |
|------------|-------------|----------------|---------------------------------------------------------------------|----------|
| 2558670257 | DRAFT_00925 | DNA_length     | 558bp                                                               |          |
| 2558670257 | DRAFT_00925 | Protein_length | 185aa                                                               |          |
| 2558670257 | DRAFT_00925 | GC             |                                                                     | 0.57     |
| 2558670258 | DRAFT_00926 | Metacyc        | PWY-6829: tRNA methylation (yeast)                                  |          |
| 2558670258 | DRAFT_00926 | COG_category   | [J] Translation, ribosomal structure and biogenesis                 |          |
| 2558670258 | DRAFT_00926 | COG2519        | tRNA(1-methyladenosine) methyltransferase and related methyltransfe | 6.00E-65 |
| 2558670258 | DRAFT_00926 | pfam08704      | GCD14                                                               | 3.80E-29 |
| 2558670258 | DRAFT_00926 | EC:2.1.1.220   | tRNA (adenine(58)-N(1))-methyltransferase.                          |          |
| 2558670258 | DRAFT_00926 | EC:2.1.1.219   | tRNA (adenine(57)-N(1)/adenine(58)-N(1))-methyltransferase.         |          |
| 2558670258 | DRAFT_00926 | KO:K07442      | tRNA (adenine57-N1/adenine58-N1)-methyltransferase [EC:2.1.1.219 2  | 0.00E+00 |
| 2558670258 | DRAFT_00926 | Locus_type     | CDS                                                                 |          |
| 2558670258 | DRAFT_00926 | Product_name   | tRNA(1-methyladenosine) methyltransferase and related methyltrans   |          |
| 2558670258 | DRAFT_00926 | Scaffold       | DRAFT_contig_70_88_len_36701_read_count_592636.15                   |          |
| 2558670258 | DRAFT_00926 | Coordinates    | 18665..19450(+)                                                     |          |
| 2558670258 | DRAFT_00926 | DNA_length     | 786bp                                                               |          |
| 2558670258 | DRAFT_00926 | Protein_length | 261aa                                                               |          |
| 2558670258 | DRAFT_00926 | GC             |                                                                     | 0.58     |
| 2558670259 | DRAFT_00927 | Locus_type     | CDS                                                                 |          |
| 2558670259 | DRAFT_00927 | Product_name   | hypothetical protein                                                |          |
| 2558670259 | DRAFT_00927 | Scaffold       | DRAFT_contig_70_88_len_36701_read_count_592636.15                   |          |
| 2558670259 | DRAFT_00927 | Coordinates    | 19549..20178(+)                                                     |          |
| 2558670259 | DRAFT_00927 | DNA_length     | 630bp                                                               |          |
| 2558670259 | DRAFT_00927 | Protein_length | 209aa                                                               |          |
| 2558670259 | DRAFT_00927 | GC             |                                                                     | 0.57     |
| 2558670259 | DRAFT_00927 | Transmembrane  | Yes                                                                 |          |
| 2558670260 | DRAFT_00928 | COG_category   | [S] Function unknown                                                |          |
| 2558670260 | DRAFT_00928 | COG2119        | Predicted membrane protein                                          | 2.00E-08 |
| 2558670260 | DRAFT_00928 | pfam01169      | UPF0016                                                             | 1.20E-09 |
| 2558670260 | DRAFT_00928 | pfam01169      | UPF0016                                                             | 4.00E-08 |
| 2558670260 | DRAFT_00928 | Locus_type     | CDS                                                                 |          |
| 2558670260 | DRAFT_00928 | Product_name   | Predicted membrane protein                                          |          |

|            |             |                |                                                     |           |
|------------|-------------|----------------|-----------------------------------------------------|-----------|
| 2558670260 | DRAFT_00928 | Scaffold       | DRAFT_contig_70_88_len_36701_read_count_592636.15   |           |
| 2558670260 | DRAFT_00928 | Coordinates    | 20372..20974(+)                                     |           |
| 2558670260 | DRAFT_00928 | DNA_length     | 603bp                                               |           |
| 2558670260 | DRAFT_00928 | Protein_length | 200aa                                               |           |
| 2558670260 | DRAFT_00928 | GC             |                                                     | 0.57      |
| 2558670260 | DRAFT_00928 | Transmembrane  | Yes                                                 |           |
| 2558670261 | DRAFT_00929 | KEGG_module    | M00360: Aminoacyl-tRNA biosynthesis, prokaryotes    |           |
| 2558670261 | DRAFT_00929 | KEGG_module    | M00359: Aminoacyl-tRNA biosynthesis, eukaryotes     |           |
| 2558670261 | DRAFT_00929 | Metacyc        | TRNA-CHARGING-PWY: tRNA charging                    |           |
| 2558670261 | DRAFT_00929 | IMG_pathway    | 500: L-proline ligation to tRNA(Pro)                |           |
| 2558670261 | DRAFT_00929 | COG_category   | [J] Translation, ribosomal structure and biogenesis |           |
| 2558670261 | DRAFT_00929 | COG0442        | Prolyl-tRNA synthetase                              | 2.00E-104 |
| 2558670261 | DRAFT_00929 | pfam00587      | tRNA-synt_2b                                        | 7.60E-19  |
| 2558670261 | DRAFT_00929 | pfam03129      | HGTP_anticodon                                      | 1.70E-17  |
| 2558670261 | DRAFT_00929 | pfam09180      | ProRS-C_1                                           | 1.30E-16  |
| 2558670261 | DRAFT_00929 | EC:6.1.1.15    | Proline--tRNA ligase.                               |           |
| 2558670261 | DRAFT_00929 | TIGR00408      | prolyl-tRNA synthetase, family I                    | 0.00E+00  |
| 2558670261 | DRAFT_00929 | KO:K01881      | prolyl-tRNA synthetase [EC:6.1.1.15]                | 0.00E+00  |
| 2558670261 | DRAFT_00929 | ITERM:01944    | prolyl-tRNA synthetase (EC 6.1.1.15)                |           |
| 2558670261 | DRAFT_00929 | Locus_type     | CDS                                                 |           |
| 2558670261 | DRAFT_00929 | Product_name   | prolyl-tRNA synthetase (EC 6.1.1.15)                |           |
| 2558670261 | DRAFT_00929 | Scaffold       | DRAFT_contig_70_88_len_36701_read_count_592636.15   |           |
| 2558670261 | DRAFT_00929 | Coordinates    | 21095..22540(+)                                     |           |
| 2558670261 | DRAFT_00929 | DNA_length     | 1446bp                                              |           |
| 2558670261 | DRAFT_00929 | Protein_length | 481aa                                               |           |
| 2558670261 | DRAFT_00929 | GC             |                                                     | 0.58      |
| 2558670262 | DRAFT_00930 | COG_category   | [G] Carbohydrate transport and metabolism           |           |
| 2558670262 | DRAFT_00930 | COG0524        | Sugar kinases, ribokinase family                    | 3.00E-18  |
| 2558670262 | DRAFT_00930 | pfam00294      | PfkB                                                | 4.30E-23  |
| 2558670262 | DRAFT_00930 | Locus_type     | CDS                                                 |           |
| 2558670262 | DRAFT_00930 | Product_name   | Sugar kinases, ribokinase family                    |           |
| 2558670262 | DRAFT_00930 | Scaffold       | DRAFT_contig_70_88_len_36701_read_count_592636.15   |           |



|            |             |                |                                                                |          |
|------------|-------------|----------------|----------------------------------------------------------------|----------|
| 2558670262 | DRAFT_00930 | Coordinates    | 22564..23469(-)                                                |          |
| 2558670262 | DRAFT_00930 | DNA_length     | 906bp                                                          |          |
| 2558670262 | DRAFT_00930 | Protein_length | 301aa                                                          |          |
| 2558670262 | DRAFT_00930 | GC             |                                                                | 0.59     |
| 2558670263 | DRAFT_00931 | KEGG_module    | M00179: Ribosome, archaea                                      |          |
| 2558670263 | DRAFT_00931 | KEGG_module    | M00177: Ribosome, eukaryotes                                   |          |
| 2558670263 | DRAFT_00931 | COG_category   | [J] Translation, ribosomal structure and biogenesis            |          |
| 2558670263 | DRAFT_00931 | COG4830        | Ribosomal protein S26                                          | 9.00E-18 |
| 2558670263 | DRAFT_00931 | pfam01283      | Ribosomal_S26e                                                 | 1.20E-28 |
| 2558670263 | DRAFT_00931 | KO:K02976      | small subunit ribosomal protein S26e                           | 7.80E-31 |
| 2558670263 | DRAFT_00931 | Locus_type     | CDS                                                            |          |
| 2558670263 | DRAFT_00931 | Product_name   | Ribosomal protein S26                                          |          |
| 2558670263 | DRAFT_00931 | Scaffold       | DRAFT_contig_70_88_len_36701_read_count_592636.15              |          |
| 2558670263 | DRAFT_00931 | Coordinates    | 23597..23872(+)                                                |          |
| 2558670263 | DRAFT_00931 | DNA_length     | 276bp                                                          |          |
| 2558670263 | DRAFT_00931 | Protein_length | 91aa                                                           |          |
| 2558670263 | DRAFT_00931 | GC             |                                                                | 0.55     |
| 2558670264 | DRAFT_00932 | Locus_type     | CDS                                                            |          |
| 2558670264 | DRAFT_00932 | Product_name   | hypothetical protein                                           |          |
| 2558670264 | DRAFT_00932 | Scaffold       | DRAFT_contig_70_88_len_36701_read_count_592636.15              |          |
| 2558670264 | DRAFT_00932 | Coordinates    | 24030..24335(+)                                                |          |
| 2558670264 | DRAFT_00932 | DNA_length     | 306bp                                                          |          |
| 2558670264 | DRAFT_00932 | Protein_length | 101aa                                                          |          |
| 2558670264 | DRAFT_00932 | GC             |                                                                | 0.56     |
| 2558670265 | DRAFT_00933 | Metacyc        | PWY-5668: cardiolipin biosynthesis I                           |          |
| 2558670265 | DRAFT_00933 | Metacyc        | PWY4FS-7: phosphatidylglycerol biosynthesis I (plastidic)      |          |
| 2558670265 | DRAFT_00933 | Metacyc        | PWY4FS-8: phosphatidylglycerol biosynthesis II (non-plastidic) |          |
| 2558670265 | DRAFT_00933 | Metacyc        | PWY-5269: cardiolipin biosynthesis II                          |          |
| 2558670265 | DRAFT_00933 | Metacyc        | PWY0-1545: cardiolipin biosynthesis III                        |          |
| 2558670265 | DRAFT_00933 | COG_category   | [I] Lipid transport and metabolism                             |          |
| 2558670265 | DRAFT_00933 | COG0558        | Phosphatidylglycerophosphate synthase                          | 2.00E-10 |

|            |             |                |                                                                       |          |
|------------|-------------|----------------|-----------------------------------------------------------------------|----------|
| 2558670265 | DRAFT_00933 | pfam01066      | CDP-OH_P_transf                                                       | 1.30E-12 |
| 2558670265 | DRAFT_00933 | EC:2.7.8.5     | CDP-diacylglycerol--glycerol-3-phosphate 3-phosphatidyltransferase.   |          |
| 2558670265 | DRAFT_00933 | KO:K00995      | CDP-diacylglycerol--glycerol-3-phosphate 3-phosphatidyltransferase [E | 0.00E+00 |
| 2558670265 | DRAFT_00933 | Locus_type     | CDS                                                                   |          |
| 2558670265 | DRAFT_00933 | Product_name   | Phosphatidylglycerophosphate synthase                                 |          |
| 2558670265 | DRAFT_00933 | Scaffold       | DRAFT_contig_70_88_len_36701_read_count_592636.15                     |          |
| 2558670265 | DRAFT_00933 | Coordinates    | 24326..24919(-)                                                       |          |
| 2558670265 | DRAFT_00933 | DNA_length     | 594bp                                                                 |          |
| 2558670265 | DRAFT_00933 | Protein_length | 197aa                                                                 |          |
| 2558670265 | DRAFT_00933 | GC             |                                                                       | 0.59     |
| 2558670265 | DRAFT_00933 | Transmembrane  | Yes                                                                   |          |
|            |             |                |                                                                       |          |
| 2558670266 | DRAFT_00934 | Locus_type     | CDS                                                                   |          |
| 2558670266 | DRAFT_00934 | Product_name   | hypothetical protein                                                  |          |
| 2558670266 | DRAFT_00934 | Scaffold       | DRAFT_contig_70_88_len_36701_read_count_592636.15                     |          |
| 2558670266 | DRAFT_00934 | Coordinates    | 24956..25159(+)                                                       |          |
| 2558670266 | DRAFT_00934 | DNA_length     | 204bp                                                                 |          |
| 2558670266 | DRAFT_00934 | Protein_length | 67aa                                                                  |          |
| 2558670266 | DRAFT_00934 | GC             |                                                                       | 0.57     |
|            |             |                |                                                                       |          |
| 2558670267 | DRAFT_00935 | IMG_pathway    | 504: L-threonine ligation to tRNA(Thr)                                |          |
| 2558670267 | DRAFT_00935 | COG_category   | [J] Translation, ribosomal structure and biogenesis                   |          |
| 2558670267 | DRAFT_00935 | COG0441        | Threonyl-tRNA synthetase                                              | 0.00E+00 |
| 2558670267 | DRAFT_00935 | pfam03129      | HGTP_anticodon                                                        | 1.90E-16 |
| 2558670267 | DRAFT_00935 | pfam08915      | tRNA-Thr_ED                                                           | 2.00E-38 |
| 2558670267 | DRAFT_00935 | pfam00587      | tRNA-synt_2b                                                          | 7.60E-36 |
| 2558670267 | DRAFT_00935 | TIGR00418      | threonyl-tRNA synthetase                                              | 0.00E+00 |
| 2558670267 | DRAFT_00935 | ITERM:00389    | threonyl-tRNA synthetase (EC 6.1.1.3)                                 |          |
| 2558670267 | DRAFT_00935 | Locus_type     | CDS                                                                   |          |
| 2558670267 | DRAFT_00935 | Product_name   | threonyl-tRNA synthetase (EC 6.1.1.3)                                 |          |
| 2558670267 | DRAFT_00935 | Scaffold       | DRAFT_contig_70_88_len_36701_read_count_592636.15                     |          |
| 2558670267 | DRAFT_00935 | Coordinates    | 25191..26864(+)                                                       |          |
| 2558670267 | DRAFT_00935 | DNA_length     | 1674bp                                                                |          |
| 2558670267 | DRAFT_00935 | Protein_length | 557aa                                                                 |          |

|            |             |                |                                                                                  |          |
|------------|-------------|----------------|----------------------------------------------------------------------------------|----------|
| 2558670267 | DRAFT_00935 | GC             |                                                                                  | 0.57     |
| 2558670268 | DRAFT_00936 | KEGG_module    | M00133: Polyamine biosynthesis, arginine => agmatine => putrescine => spermidine |          |
| 2558670268 | DRAFT_00936 | Metacyc        | PWY-40: putrescine biosynthesis I                                                |          |
| 2558670268 | DRAFT_00936 | Metacyc        | PWY-6305: putrescine biosynthesis IV                                             |          |
| 2558670268 | DRAFT_00936 | Metacyc        | PWY0-823: arginine degradation III (arginine decarboxylase/agmatinase pathway)   |          |
| 2558670268 | DRAFT_00936 | COG_category   | [E] Amino acid transport and metabolism                                          |          |
| 2558670268 | DRAFT_00936 | COG0010        | Arginase/agmatinase/formimionoglutamate hydrolase, arginase family               | 2.00E-54 |
| 2558670268 | DRAFT_00936 | pfam00491      | Arginase                                                                         | 2.40E-67 |
| 2558670268 | DRAFT_00936 | EC:3.5.3.11    | Agmatinase.                                                                      |          |
| 2558670268 | DRAFT_00936 | TIGR01230      | agmatinase                                                                       | 5.70E-70 |
| 2558670268 | DRAFT_00936 | KO:K01480      | agmatinase [EC:3.5.3.11]                                                         | 0.00E+00 |
| 2558670268 | DRAFT_00936 | Locus_type     | CDS                                                                              |          |
| 2558670268 | DRAFT_00936 | Product_name   | agmatinase                                                                       |          |
| 2558670268 | DRAFT_00936 | Scaffold       | DRAFT_contig_70_88_len_36701_read_count_592636.15                                |          |
| 2558670268 | DRAFT_00936 | Coordinates    | 26870..27823(-)                                                                  |          |
| 2558670268 | DRAFT_00936 | DNA_length     | 954bp                                                                            |          |
| 2558670268 | DRAFT_00936 | Protein_length | 317aa                                                                            |          |
| 2558670268 | DRAFT_00936 | GC             |                                                                                  | 0.6      |
| 2558670269 | DRAFT_00937 | Locus_type     | CDS                                                                              |          |
| 2558670269 | DRAFT_00937 | Product_name   | hypothetical protein                                                             |          |
| 2558670269 | DRAFT_00937 | Scaffold       | DRAFT_contig_70_88_len_36701_read_count_592636.15                                |          |
| 2558670269 | DRAFT_00937 | Coordinates    | 27829..27948(+)                                                                  |          |
| 2558670269 | DRAFT_00937 | DNA_length     | 120bp                                                                            |          |
| 2558670269 | DRAFT_00937 | Protein_length | 39aa                                                                             |          |
| 2558670269 | DRAFT_00937 | GC             |                                                                                  | 0.52     |
| 2558670270 | DRAFT_00938 | Locus_type     | CDS                                                                              |          |
| 2558670270 | DRAFT_00938 | Product_name   | hypothetical protein                                                             |          |
| 2558670270 | DRAFT_00938 | Scaffold       | DRAFT_contig_70_88_len_36701_read_count_592636.15                                |          |
| 2558670270 | DRAFT_00938 | Coordinates    | 28271..29164(+)                                                                  |          |
| 2558670270 | DRAFT_00938 | DNA_length     | 894bp                                                                            |          |
| 2558670270 | DRAFT_00938 | Protein_length | 297aa                                                                            |          |

|            |             |                |                                                                  |          |
|------------|-------------|----------------|------------------------------------------------------------------|----------|
| 2558670270 | DRAFT_00938 | GC             |                                                                  | 0.56     |
| 2558670270 | DRAFT_00938 | Transmembrane  | Yes                                                              |          |
| 2558670271 | DRAFT_00939 | KEGG_module    | M00534: Naphthalene degradataion, naphthalene => salicylate      |          |
| 2558670271 | DRAFT_00939 | Metacyc        | PWY-5427: naphthalene degradation                                |          |
| 2558670271 | DRAFT_00939 | COG_category   | [Q] Secondary metabolites biosynthesis, transport and catabolism |          |
| 2558670271 | DRAFT_00939 | COG3917        | 2-hydroxychromene-2-carboxylate isomerase                        | 2.00E-27 |
| 2558670271 | DRAFT_00939 | pfam01323      | DSBA                                                             | 1.40E-36 |
| 2558670271 | DRAFT_00939 | EC:5.99.1.4    | 2-hydroxychromene-2-carboxylate isomerase.                       |          |
| 2558670271 | DRAFT_00939 | KO:K14584      | 2-hydroxychromene-2-carboxylate isomerase [EC:5.99.1.4]          | 4.10E-28 |
| 2558670271 | DRAFT_00939 | Locus_type     | CDS                                                              |          |
| 2558670271 | DRAFT_00939 | Product_name   | 2-hydroxychromene-2-carboxylate isomerase                        |          |
| 2558670271 | DRAFT_00939 | Scaffold       | DRAFT_contig_70_88_len_36701_read_count_592636.15                |          |
| 2558670271 | DRAFT_00939 | Coordinates    | 29300..29893(+)                                                  |          |
| 2558670271 | DRAFT_00939 | DNA_length     | 594bp                                                            |          |
| 2558670271 | DRAFT_00939 | Protein_length | 197aa                                                            |          |
| 2558670271 | DRAFT_00939 | GC             |                                                                  | 0.52     |
| 2558670272 | DRAFT_00940 | Locus_type     | CDS                                                              |          |
| 2558670272 | DRAFT_00940 | Product_name   | hypothetical protein                                             |          |
| 2558670272 | DRAFT_00940 | Scaffold       | DRAFT_contig_70_88_len_36701_read_count_592636.15                |          |
| 2558670272 | DRAFT_00940 | Coordinates    | 30157..33690(+)                                                  |          |
| 2558670272 | DRAFT_00940 | DNA_length     | 3534bp                                                           |          |
| 2558670272 | DRAFT_00940 | Protein_length | 1177aa                                                           |          |
| 2558670272 | DRAFT_00940 | GC             |                                                                  | 0.57     |
| 2558670272 | DRAFT_00940 | Transmembrane  | Yes                                                              |          |
| 2558670273 | DRAFT_00941 | Locus_type     | CDS                                                              |          |
| 2558670273 | DRAFT_00941 | Product_name   | hypothetical protein                                             |          |
| 2558670273 | DRAFT_00941 | Scaffold       | DRAFT_contig_70_88_len_36701_read_count_592636.15                |          |
| 2558670273 | DRAFT_00941 | Coordinates    | 33988..34386(-)                                                  |          |
| 2558670273 | DRAFT_00941 | DNA_length     | 399bp                                                            |          |
| 2558670273 | DRAFT_00941 | Protein_length | 132aa                                                            |          |
| 2558670273 | DRAFT_00941 | GC             |                                                                  | 0.55     |

|            |             |                |                                          |                                                                 |          |
|------------|-------------|----------------|------------------------------------------|-----------------------------------------------------------------|----------|
| 2558670274 | DRAFT_00942 | pfam02195      | ParBc                                    |                                                                 | 2.10E-06 |
| 2558670274 | DRAFT_00942 | Locus_type     |                                          | CDS                                                             |          |
| 2558670274 | DRAFT_00942 | Product_name   |                                          | ParB-like nuclease domain                                       |          |
| 2558670274 | DRAFT_00942 | Scaffold       |                                          | DRAFT_contig_70_88_len_36701_read_count_592636.15               |          |
| 2558670274 | DRAFT_00942 | Coordinates    |                                          | 34513..35004(+)                                                 |          |
| 2558670274 | DRAFT_00942 | DNA_length     |                                          | 492bp                                                           |          |
| 2558670274 | DRAFT_00942 | Protein_length |                                          | 163aa                                                           |          |
| 2558670274 | DRAFT_00942 | GC             |                                          |                                                                 | 0.44     |
| 2558670275 | DRAFT_00943 | COG_category   | [E] Amino acid transport and metabolism  |                                                                 |          |
| 2558670275 | DRAFT_00943 | COG2309        | Leucyl aminopeptidase (aminopeptidase T) |                                                                 | 2.00E-28 |
| 2558670275 | DRAFT_00943 | pfam02073      | Peptidase_M29                            |                                                                 | 1.40E-27 |
| 2558670275 | DRAFT_00943 | Locus_type     |                                          | CDS                                                             |          |
| 2558670275 | DRAFT_00943 | Product_name   |                                          | Leucyl aminopeptidase (aminopeptidase T)                        |          |
| 2558670275 | DRAFT_00943 | Scaffold       |                                          | DRAFT_contig_70_88_len_36701_read_count_592636.15               |          |
| 2558670275 | DRAFT_00943 | Coordinates    |                                          | 35088..36173(-)                                                 |          |
| 2558670275 | DRAFT_00943 | DNA_length     |                                          | 1086bp                                                          |          |
| 2558670275 | DRAFT_00943 | Protein_length |                                          | 361aa                                                           |          |
| 2558670275 | DRAFT_00943 | GC             |                                          |                                                                 | 0.55     |
| 2558670276 | DRAFT_00944 | pfam00211      | Guanylate_cyc                            |                                                                 | 2.40E-14 |
| 2558670276 | DRAFT_00944 | Locus_type     |                                          | CDS                                                             |          |
| 2558670276 | DRAFT_00944 | Product_name   |                                          | Adenylate cyclase, family 3 (some proteins contain HAMP domain) |          |
| 2558670276 | DRAFT_00944 | Scaffold       |                                          | DRAFT_contig_70_88_len_36701_read_count_592636.15               |          |
| 2558670276 | DRAFT_00944 | Coordinates    |                                          | 36354..36698(+)                                                 |          |
| 2558670276 | DRAFT_00944 | DNA_length     |                                          | 345bp                                                           |          |
| 2558670276 | DRAFT_00944 | Protein_length |                                          | 115aa                                                           |          |
| 2558670276 | DRAFT_00944 | GC             |                                          |                                                                 | 0.56     |
| 2558670277 | DRAFT_00945 | Locus_type     |                                          | tRNA                                                            |          |
| 2558670277 | DRAFT_00945 | Product_name   |                                          | tRNA_Pseudo_CTC                                                 |          |
| 2558670277 | DRAFT_00945 | Scaffold       |                                          | DRAFT_contig_70_97_len_33135_read_count_580268.16               |          |
| 2558670277 | DRAFT_00945 | Coordinates    |                                          | 1..60(-)                                                        |          |

|            |             |                |                                                                                          |          |
|------------|-------------|----------------|------------------------------------------------------------------------------------------|----------|
| 2558670277 | DRAFT_00945 | DNA_length     | 60bp                                                                                     |          |
| 2558670277 | DRAFT_00945 | GC             |                                                                                          | 0.6      |
| 2558670278 | DRAFT_00946 | COG_category   | [S] Function unknown                                                                     |          |
| 2558670278 | DRAFT_00946 | COG5513        | Predicted secreted protein                                                               | 1.00E-05 |
| 2558670278 | DRAFT_00946 | pfam09394      | Inhibitor_I42                                                                            | 2.00E-13 |
| 2558670278 | DRAFT_00946 | Locus_type     | CDS                                                                                      |          |
| 2558670278 | DRAFT_00946 | Product_name   | Predicted secreted protein                                                               |          |
| 2558670278 | DRAFT_00946 | Scaffold       | DRAFT_contig_70_97_len_33135_read_count_580268.16                                        |          |
| 2558670278 | DRAFT_00946 | Coordinates    | 548..2440(-)                                                                             |          |
| 2558670278 | DRAFT_00946 | DNA_length     | 1893bp                                                                                   |          |
| 2558670278 | DRAFT_00946 | Protein_length | 630aa                                                                                    |          |
| 2558670278 | DRAFT_00946 | GC             |                                                                                          | 0.58     |
| 2558670278 | DRAFT_00946 | Transmembrane  | Yes                                                                                      |          |
| 2558670279 | DRAFT_00947 | IMG_pathway    | 433: Archaeal nucleoid proteins                                                          |          |
| 2558670279 | DRAFT_00947 | COG_category   | [B] Chromatin structure and dynamics                                                     |          |
| 2558670279 | DRAFT_00947 | COG2036        | Histones H3 and H4                                                                       | 2.00E-10 |
| 2558670279 | DRAFT_00947 | pfam00808      | CBFD_NFYB_HMF                                                                            | 5.70E-11 |
| 2558670279 | DRAFT_00947 | ITERM:00140    | archaeal histone                                                                         |          |
| 2558670279 | DRAFT_00947 | Locus_type     | CDS                                                                                      |          |
| 2558670279 | DRAFT_00947 | Product_name   | archaeal histone                                                                         |          |
| 2558670279 | DRAFT_00947 | Scaffold       | DRAFT_contig_70_97_len_33135_read_count_580268.16                                        |          |
| 2558670279 | DRAFT_00947 | Coordinates    | 2844..3071(-)                                                                            |          |
| 2558670279 | DRAFT_00947 | DNA_length     | 228bp                                                                                    |          |
| 2558670279 | DRAFT_00947 | Protein_length | 75aa                                                                                     |          |
| 2558670279 | DRAFT_00947 | GC             |                                                                                          | 0.56     |
| 2558670280 | DRAFT_00948 | COG_category   | [L] Replication, recombination and repair                                                |          |
| 2558670280 | DRAFT_00948 | COG0084        | Mg-dependent DNase                                                                       | 3.00E-32 |
| 2558670280 | DRAFT_00948 | pfam01026      | TatD_DNase                                                                               | 1.70E-33 |
| 2558670280 | DRAFT_00948 | EC:3.1.21.-    | Hydrolases. Acting on ester bonds. Endodeoxyribonucleases producing 5'-phosphomonoesters |          |
| 2558670280 | DRAFT_00948 | KO:K03424      | TatD DNase family protein [EC:3.1.21.-]                                                  | 6.40E-31 |
| 2558670280 | DRAFT_00948 | Locus_type     | CDS                                                                                      |          |

|            |             |                |                                                     |          |
|------------|-------------|----------------|-----------------------------------------------------|----------|
| 2558670280 | DRAFT_00948 | Product_name   | Mg-dependent DNase                                  |          |
| 2558670280 | DRAFT_00948 | Scaffold       | DRAFT_contig_70_97_len_33135_read_count_580268.16   |          |
| 2558670280 | DRAFT_00948 | Coordinates    | 3324..3980(+)                                       |          |
| 2558670280 | DRAFT_00948 | DNA_length     | 657bp                                               |          |
| 2558670280 | DRAFT_00948 | Protein_length | 218aa                                               |          |
| 2558670280 | DRAFT_00948 | GC             |                                                     | 0.59     |
|            |             |                |                                                     |          |
| 2558670281 | DRAFT_00949 | KEGG_module    | M00179: Ribosome, archaea                           |          |
| 2558670281 | DRAFT_00949 | KEGG_module    | M00177: Ribosome, eukaryotes                        |          |
| 2558670281 | DRAFT_00949 | COG_category   | [J] Translation, ribosomal structure and biogenesis |          |
| 2558670281 | DRAFT_00949 | COG1383        | Ribosomal protein S17E                              | 8.00E-09 |
| 2558670281 | DRAFT_00949 | pfam00833      | Ribosomal_S17e                                      | 4.00E-14 |
| 2558670281 | DRAFT_00949 | KO:K02962      | small subunit ribosomal protein S17e                | 3.20E-08 |
| 2558670281 | DRAFT_00949 | Locus_type     | CDS                                                 |          |
| 2558670281 | DRAFT_00949 | Product_name   | Ribosomal protein S17E                              |          |
| 2558670281 | DRAFT_00949 | Scaffold       | DRAFT_contig_70_97_len_33135_read_count_580268.16   |          |
| 2558670281 | DRAFT_00949 | Coordinates    | 4010..4219(+)                                       |          |
| 2558670281 | DRAFT_00949 | DNA_length     | 210bp                                               |          |
| 2558670281 | DRAFT_00949 | Protein_length | 69aa                                                |          |
| 2558670281 | DRAFT_00949 | GC             |                                                     | 0.51     |
|            |             |                |                                                     |          |
| 2558670282 | DRAFT_00950 | pfam02195      | ParBc                                               | 2.90E-06 |
| 2558670282 | DRAFT_00950 | Locus_type     | CDS                                                 |          |
| 2558670282 | DRAFT_00950 | Product_name   | Predicted transcriptional regulators                |          |
| 2558670282 | DRAFT_00950 | Scaffold       | DRAFT_contig_70_97_len_33135_read_count_580268.16   |          |
| 2558670282 | DRAFT_00950 | Coordinates    | 4223..5041(+)                                       |          |
| 2558670282 | DRAFT_00950 | DNA_length     | 819bp                                               |          |
| 2558670282 | DRAFT_00950 | Protein_length | 272aa                                               |          |
| 2558670282 | DRAFT_00950 | GC             |                                                     | 0.58     |
|            |             |                |                                                     |          |
| 2558670283 | DRAFT_00951 | Locus_type     | CDS                                                 |          |
| 2558670283 | DRAFT_00951 | Product_name   | hypothetical protein                                |          |
| 2558670283 | DRAFT_00951 | Scaffold       | DRAFT_contig_70_97_len_33135_read_count_580268.16   |          |
| 2558670283 | DRAFT_00951 | Coordinates    | 5038..5295(+)                                       |          |

|            |             |                |                                                                     |          |
|------------|-------------|----------------|---------------------------------------------------------------------|----------|
| 2558670283 | DRAFT_00951 | DNA_length     | 258bp                                                               |          |
| 2558670283 | DRAFT_00951 | Protein_length | 85aa                                                                |          |
| 2558670283 | DRAFT_00951 | GC             |                                                                     | 0.6      |
| 2558670284 | DRAFT_00952 | pfam08617      | CGI-121                                                             | 4.10E-07 |
| 2558670284 | DRAFT_00952 | KO:K09119      | hypothetical protein                                                | 5.30E-08 |
| 2558670284 | DRAFT_00952 | Locus_type     | CDS                                                                 |          |
| 2558670284 | DRAFT_00952 | Product_name   | Uncharacterized conserved protein                                   |          |
| 2558670284 | DRAFT_00952 | Scaffold       | DRAFT_contig_70_97_len_33135_read_count_580268.16                   |          |
| 2558670284 | DRAFT_00952 | Coordinates    | 5300..5761(+)                                                       |          |
| 2558670284 | DRAFT_00952 | DNA_length     | 462bp                                                               |          |
| 2558670284 | DRAFT_00952 | Protein_length | 153aa                                                               |          |
| 2558670284 | DRAFT_00952 | GC             |                                                                     | 0.58     |
| 2558670285 | DRAFT_00953 | COG_category   | [R] General function prediction only                                |          |
| 2558670285 | DRAFT_00953 | COG1818        | Predicted RNA-binding protein, contains THUMP domain                | 3.00E-14 |
| 2558670285 | DRAFT_00953 | pfam02926      | THUMP                                                               | 9.20E-11 |
| 2558670285 | DRAFT_00953 | KO:K06963      | tRNA acetyltransferase TAN1                                         | 6.30E-26 |
| 2558670285 | DRAFT_00953 | Locus_type     | CDS                                                                 |          |
| 2558670285 | DRAFT_00953 | Product_name   | Predicted RNA-binding protein, contains THUMP domain                |          |
| 2558670285 | DRAFT_00953 | Scaffold       | DRAFT_contig_70_97_len_33135_read_count_580268.16                   |          |
| 2558670285 | DRAFT_00953 | Coordinates    | 5730..6242(-)                                                       |          |
| 2558670285 | DRAFT_00953 | DNA_length     | 513bp                                                               |          |
| 2558670285 | DRAFT_00953 | Protein_length | 170aa                                                               |          |
| 2558670285 | DRAFT_00953 | GC             |                                                                     | 0.56     |
| 2558670286 | DRAFT_00954 | COG_category   | [J] Translation, ribosomal structure and biogenesis                 |          |
| 2558670286 | DRAFT_00954 | COG0009        | Putative translation factor (SUA5)                                  | 2.00E-48 |
| 2558670286 | DRAFT_00954 | pfam01300      | Sua5_yciO_yrdC                                                      | 9.90E-52 |
| 2558670286 | DRAFT_00954 | TIGR00057      | tRNA threonylcarbamoyl adenosine modification protein, Sua5/YciO/Yr | 9.60E-53 |
| 2558670286 | DRAFT_00954 | KO:K07566      | tRNA threonylcarbamoyladenosine biosynthesis protein                | 2.00E-42 |
| 2558670286 | DRAFT_00954 | ITERM:02777    | translation factor SUA5                                             |          |
| 2558670286 | DRAFT_00954 | Locus_type     | CDS                                                                 |          |
| 2558670286 | DRAFT_00954 | Product_name   | translation factor SUA5                                             |          |



|            |             |                |                 |                                                   |
|------------|-------------|----------------|-----------------|---------------------------------------------------|
| 2558670286 | DRAFT_00954 | Scaffold       |                 | DRAFT_contig_70_97_len_33135_read_count_580268.16 |
| 2558670286 | DRAFT_00954 | Coordinates    |                 | 6239..6847(-)                                     |
| 2558670286 | DRAFT_00954 | DNA_length     |                 | 609bp                                             |
| 2558670286 | DRAFT_00954 | Protein_length |                 | 202aa                                             |
| 2558670286 | DRAFT_00954 | GC             |                 | 0.59                                              |
| 2558670287 | DRAFT_00955 | pfam13489      | Methyltransf_23 | 2.50E-10                                          |
| 2558670287 | DRAFT_00955 | Locus_type     |                 | CDS                                               |
| 2558670287 | DRAFT_00955 | Product_name   |                 | Methyltransferase domain                          |
| 2558670287 | DRAFT_00955 | Scaffold       |                 | DRAFT_contig_70_97_len_33135_read_count_580268.16 |
| 2558670287 | DRAFT_00955 | Coordinates    |                 | 6989..7771(+)                                     |
| 2558670287 | DRAFT_00955 | DNA_length     |                 | 783bp                                             |
| 2558670287 | DRAFT_00955 | Protein_length |                 | 260aa                                             |
| 2558670287 | DRAFT_00955 | GC             |                 | 0.5                                               |
| 2558670288 | DRAFT_00956 | Locus_type     |                 | CDS                                               |
| 2558670288 | DRAFT_00956 | Product_name   |                 | hypothetical protein                              |
| 2558670288 | DRAFT_00956 | Scaffold       |                 | DRAFT_contig_70_97_len_33135_read_count_580268.16 |
| 2558670288 | DRAFT_00956 | Coordinates    |                 | 7923..8321(-)                                     |
| 2558670288 | DRAFT_00956 | DNA_length     |                 | 399bp                                             |
| 2558670288 | DRAFT_00956 | Protein_length |                 | 132aa                                             |
| 2558670288 | DRAFT_00956 | GC             |                 | 0.56                                              |
| 2558670289 | DRAFT_00957 | Locus_type     |                 | CDS                                               |
| 2558670289 | DRAFT_00957 | Product_name   |                 | hypothetical protein                              |
| 2558670289 | DRAFT_00957 | Scaffold       |                 | DRAFT_contig_70_97_len_33135_read_count_580268.16 |
| 2558670289 | DRAFT_00957 | Coordinates    |                 | 8336..8818(-)                                     |
| 2558670289 | DRAFT_00957 | DNA_length     |                 | 483bp                                             |
| 2558670289 | DRAFT_00957 | Protein_length |                 | 160aa                                             |
| 2558670289 | DRAFT_00957 | GC             |                 | 0.49                                              |
| 2558670290 | DRAFT_00958 | Locus_type     |                 | CDS                                               |
| 2558670290 | DRAFT_00958 | Product_name   |                 | hypothetical protein                              |
| 2558670290 | DRAFT_00958 | Scaffold       |                 | DRAFT_contig_70_97_len_33135_read_count_580268.16 |

|            |             |                |                                                                   |          |
|------------|-------------|----------------|-------------------------------------------------------------------|----------|
| 2558670290 | DRAFT_00958 | Coordinates    | 8827..9009(-)                                                     |          |
| 2558670290 | DRAFT_00958 | DNA_length     | 183bp                                                             |          |
| 2558670290 | DRAFT_00958 | Protein_length | 60aa                                                              |          |
| 2558670290 | DRAFT_00958 | GC             |                                                                   | 0.55     |
| 2558670291 | DRAFT_00959 | COG_category   | [L] Replication, recombination and repair                         |          |
| 2558670291 | DRAFT_00959 | COG3316        | Transposase and inactivated derivatives                           | 9.00E-08 |
| 2558670291 | DRAFT_00959 | pfam13610      | DDE_Tnp_IS240                                                     | 2.80E-19 |
| 2558670291 | DRAFT_00959 | Locus_type     | CDS                                                               |          |
| 2558670291 | DRAFT_00959 | Product_name   | Transposase and inactivated derivatives                           |          |
| 2558670291 | DRAFT_00959 | Scaffold       | DRAFT_contig_70_97_len_33135_read_count_580268.16                 |          |
| 2558670291 | DRAFT_00959 | Coordinates    | 9139..10359(+)                                                    |          |
| 2558670291 | DRAFT_00959 | DNA_length     | 1221bp                                                            |          |
| 2558670291 | DRAFT_00959 | Protein_length | 406aa                                                             |          |
| 2558670291 | DRAFT_00959 | GC             |                                                                   | 0.57     |
| 2558670292 | DRAFT_00960 | Locus_type     | CDS                                                               |          |
| 2558670292 | DRAFT_00960 | Product_name   | hypothetical protein                                              |          |
| 2558670292 | DRAFT_00960 | Scaffold       | DRAFT_contig_70_97_len_33135_read_count_580268.16                 |          |
| 2558670292 | DRAFT_00960 | Coordinates    | 10381..10758(+)                                                   |          |
| 2558670292 | DRAFT_00960 | DNA_length     | 378bp                                                             |          |
| 2558670292 | DRAFT_00960 | Protein_length | 125aa                                                             |          |
| 2558670292 | DRAFT_00960 | GC             |                                                                   | 0.5      |
| 2558670292 | DRAFT_00960 | Transmembrane  | Yes                                                               |          |
| 2558670293 | DRAFT_00961 | KEGG_module    | M00002: Glycolysis, core module involving three-carbon compounds  |          |
| 2558670293 | DRAFT_00961 | KEGG_module    | M00001: Glycolysis (Embden-Meyerhof pathway), glucose => pyruvate |          |
| 2558670293 | DRAFT_00961 | KEGG_module    | M00003: Gluconeogenesis, oxaloacetate => fructose-6P              |          |
| 2558670293 | DRAFT_00961 | Metacyc        | PWY-7003: glycerol degradation to butanol                         |          |
| 2558670293 | DRAFT_00961 | Metacyc        | ANAGLYCOLYSIS-PWY: glycolysis III (glucokinase)                   |          |
| 2558670293 | DRAFT_00961 | Metacyc        | GLYCOLYSIS: glycolysis I                                          |          |
| 2558670293 | DRAFT_00961 | Metacyc        | P341-PWY: glycolysis V (Pyrococcus)                               |          |
| 2558670293 | DRAFT_00961 | Metacyc        | CALVIN-PWY: Calvin-Benson-Bassham cycle                           |          |
| 2558670293 | DRAFT_00961 | Metacyc        | PWY-5484: glycolysis II (from fructose-6P)                        |          |

|            |             |                |                                                                            |          |
|------------|-------------|----------------|----------------------------------------------------------------------------|----------|
| 2558670293 | DRAFT_00961 | Metacyc        | P185-PWY: formaldehyde assimilation III (dihydroxyacetone cycle)           |          |
| 2558670293 | DRAFT_00961 | Metacyc        | GLUCONEO-PWY: gluconeogenesis I                                            |          |
| 2558670293 | DRAFT_00961 | Metacyc        | PWY66-373: sucrose degradation V (mammalian)                               |          |
| 2558670293 | DRAFT_00961 | Metacyc        | PWY-6142: gluconeogenesis II (<i>Methanobacterium thermoautotrophicum</i>) |          |
| 2558670293 | DRAFT_00961 | Metacyc        | PWY-1042: glycolysis IV (plant cytosol)                                    |          |
| 2558670293 | DRAFT_00961 | IMG_pathway    | 336: Standard Embden-Meyerhof pathway                                      |          |
| 2558670293 | DRAFT_00961 | IMG_pathway    | 337: Embden-Meyerhof pathway without bisphosphoglycerate                   |          |
| 2558670293 | DRAFT_00961 | IMG_pathway    | 527: Calvin cycle                                                          |          |
| 2558670293 | DRAFT_00961 | COG_category   | [G] Carbohydrate transport and metabolism                                  |          |
| 2558670293 | DRAFT_00961 | COG0149        | Triosephosphate isomerase                                                  | 6.00E-27 |
| 2558670293 | DRAFT_00961 | pfam00121      | TIM                                                                        | 2.40E-08 |
| 2558670293 | DRAFT_00961 | pfam00121      | TIM                                                                        | 3.50E-08 |
| 2558670293 | DRAFT_00961 | EC:5.3.1.1     | Triose-phosphate isomerase.                                                |          |
| 2558670293 | DRAFT_00961 | TIGR00419      | triosephosphate isomerase                                                  | 8.90E-41 |
| 2558670293 | DRAFT_00961 | KO:K01803      | triosephosphate isomerase (TIM) [EC:5.3.1.1]                               | 0.00E+00 |
| 2558670293 | DRAFT_00961 | ITERM:01475    | triosephosphate isomerase (EC 5.3.1.1)                                     |          |
| 2558670293 | DRAFT_00961 | Locus_type     | CDS                                                                        |          |
| 2558670293 | DRAFT_00961 | Product_name   | triosephosphate isomerase (EC 5.3.1.1)                                     |          |
| 2558670293 | DRAFT_00961 | Scaffold       | DRAFT_contig_70_97_len_33135_read_count_580268.16                          |          |
| 2558670293 | DRAFT_00961 | Coordinates    | 11490..12152(+)                                                            |          |
| 2558670293 | DRAFT_00961 | DNA_length     | 663bp                                                                      |          |
| 2558670293 | DRAFT_00961 | Protein_length | 220aa                                                                      |          |
| 2558670293 | DRAFT_00961 | GC             |                                                                            | 0.6      |
| 2558670294 | DRAFT_00962 | KEGG_module    | M00344: Formaldehyde assimilation, xylulose monophosphate pathway          |          |
| 2558670294 | DRAFT_00962 | KEGG_module    | M00165: Reductive pentose phosphate cycle (Calvin cycle)                   |          |
| 2558670294 | DRAFT_00962 | KEGG_module    | M00167: Reductive pentose phosphate cycle, glyceraldehyde-3P => RuBP       |          |
| 2558670294 | DRAFT_00962 | KEGG_module    | M00003: Gluconeogenesis, oxaloacetate => fructose-6P                       |          |
| 2558670294 | DRAFT_00962 | Metacyc        | GLUCONEO-PWY: gluconeogenesis I                                            |          |
| 2558670294 | DRAFT_00962 | Metacyc        | PWY-5484: glycolysis II (from fructose-6P)                                 |          |
| 2558670294 | DRAFT_00962 | Metacyc        | GLYCOLYSIS: glycolysis I                                                   |          |
| 2558670294 | DRAFT_00962 | Metacyc        | P185-PWY: formaldehyde assimilation III (dihydroxyacetone cycle)           |          |
| 2558670294 | DRAFT_00962 | Metacyc        | SUCSYN-PWY: sucrose biosynthesis                                           |          |
| 2558670294 | DRAFT_00962 | Metacyc        | CALVIN-PWY: Calvin-Benson-Bassham cycle                                    |          |

|            |             |                |                                                   |          |
|------------|-------------|----------------|---------------------------------------------------|----------|
| 2558670294 | DRAFT_00962 | COG_category   | [G] Carbohydrate transport and metabolism         |          |
| 2558670294 | DRAFT_00962 | COG0158        | Fructose-1,6-bisphosphatase                       | 9.00E-62 |
| 2558670294 | DRAFT_00962 | pfam00316      | FBPase                                            | 7.70E-63 |
| 2558670294 | DRAFT_00962 | EC:3.1.3.11    | Fructose-bisphosphatase.                          |          |
| 2558670294 | DRAFT_00962 | KO:K03841      | fructose-1,6-bisphosphatase I [EC:3.1.3.11]       | 0.00E+00 |
| 2558670294 | DRAFT_00962 | Locus_type     | CDS                                               |          |
| 2558670294 | DRAFT_00962 | Product_name   | Fructose-1,6-bisphosphatase                       |          |
| 2558670294 | DRAFT_00962 | Scaffold       | DRAFT_contig_70_97_len_33135_read_count_580268.16 |          |
| 2558670294 | DRAFT_00962 | Coordinates    | 12284..13180(-)                                   |          |
| 2558670294 | DRAFT_00962 | DNA_length     | 897bp                                             |          |
| 2558670294 | DRAFT_00962 | Protein_length | 298aa                                             |          |
| 2558670294 | DRAFT_00962 | GC             |                                                   | 0.6      |
| 2558670295 | DRAFT_00963 | Metacyc        | ARGININE-SYN4-PWY: arginine biosynthesis IV       |          |
| 2558670295 | DRAFT_00963 | Metacyc        | GLUTAMATE-SYN2-PWY: glutamate biosynthesis II     |          |
| 2558670295 | DRAFT_00963 | Metacyc        | PWY-5766: glutamate degradation X                 |          |
| 2558670295 | DRAFT_00963 | COG_category   | [E] Amino acid transport and metabolism           |          |
| 2558670295 | DRAFT_00963 | COG0334        | Glutamate dehydrogenase/leucine dehydrogenase     | 0.00E+00 |
| 2558670295 | DRAFT_00963 | pfam00208      | ELFV_dehydrog                                     | 4.10E-69 |
| 2558670295 | DRAFT_00963 | pfam02812      | ELFV_dehydrog_N                                   | 8.40E-52 |
| 2558670295 | DRAFT_00963 | EC:1.4.1.3     | Glutamate dehydrogenase (NAD(P)(+)).              |          |
| 2558670295 | DRAFT_00963 | KO:K00261      | glutamate dehydrogenase (NAD(P)+) [EC:1.4.1.3]    | 0.00E+00 |
| 2558670295 | DRAFT_00963 | Locus_type     | CDS                                               |          |
| 2558670295 | DRAFT_00963 | Product_name   | glutamate dehydrogenase (NAD/NADP) (EC 1.4.1.3)   |          |
| 2558670295 | DRAFT_00963 | Scaffold       | DRAFT_contig_70_97_len_33135_read_count_580268.16 |          |
| 2558670295 | DRAFT_00963 | Coordinates    | 13659..14912(+)                                   |          |
| 2558670295 | DRAFT_00963 | DNA_length     | 1254bp                                            |          |
| 2558670295 | DRAFT_00963 | Protein_length | 417aa                                             |          |
| 2558670295 | DRAFT_00963 | GC             |                                                   | 0.6      |
| 2558670296 | DRAFT_00964 | Metacyc        | PWY-1042: glycolysis IV (plant cytosol)           |          |
| 2558670296 | DRAFT_00964 | Metacyc        | P341-PWY: glycolysis V (Pyrococcus)               |          |
| 2558670296 | DRAFT_00964 | Metacyc        | GLUCONEO-PWY: gluconeogenesis I                   |          |
| 2558670296 | DRAFT_00964 | Metacyc        | ANAGLYCOLYSIS-PWY: glycolysis III (glucokinase)   |          |

|            |             |                |                                                                              |          |
|------------|-------------|----------------|------------------------------------------------------------------------------|----------|
| 2558670296 | DRAFT_00964 | Metacyc        | CALVIN-PWY: Calvin-Benson-Bassham cycle                                      |          |
| 2558670296 | DRAFT_00964 | Metacyc        | PWY66-373: sucrose degradation V (mammalian)                                 |          |
| 2558670296 | DRAFT_00964 | Metacyc        | SUCSYN-PWY: sucrose biosynthesis                                             |          |
| 2558670296 | DRAFT_00964 | Metacyc        | GLYCOLYSIS: glycolysis I                                                     |          |
| 2558670296 | DRAFT_00964 | Metacyc        | PWY-5484: glycolysis II (from fructose-6P)                                   |          |
| 2558670296 | DRAFT_00964 | Metacyc        | PWY-1861: formaldehyde assimilation II (RuMP Cycle)                          |          |
| 2558670296 | DRAFT_00964 | Metacyc        | PWY-6142: gluconeogenesis II ( <i>Methanobacterium thermoautotrophicum</i> ) |          |
| 2558670296 | DRAFT_00964 | Metacyc        | P185-PWY: formaldehyde assimilation III (dihydroxyacetone cycle)             |          |
| 2558670296 | DRAFT_00964 | COG_category   | [G] Carbohydrate transport and metabolism                                    |          |
| 2558670296 | DRAFT_00964 | COG1830        | DhnA-type fructose-1,6-bisphosphate aldolase and related enzymes             | 3.00E-59 |
| 2558670296 | DRAFT_00964 | pfam01791      | DeoC                                                                         | 2.50E-35 |
| 2558670296 | DRAFT_00964 | EC:4.1.2.13    | Fructose-bisphosphate aldolase.                                              |          |
| 2558670296 | DRAFT_00964 | KO:K11645      | fructose-bisphosphate aldolase, class I [EC:4.1.2.13]                        | 0.00E+00 |
| 2558670296 | DRAFT_00964 | Locus_type     | CDS                                                                          |          |
| 2558670296 | DRAFT_00964 | Product_name   | fructose-bisphosphate aldolase (EC 4.1.2.13)                                 |          |
| 2558670296 | DRAFT_00964 | Scaffold       | DRAFT_contig_70_97_len_33135_read_count_580268.16                            |          |
| 2558670296 | DRAFT_00964 | Coordinates    | 15056..15835(+)                                                              |          |
| 2558670296 | DRAFT_00964 | DNA_length     | 780bp                                                                        |          |
| 2558670296 | DRAFT_00964 | Protein_length | 259aa                                                                        |          |
| 2558670296 | DRAFT_00964 | GC             |                                                                              | 0.62     |
| 2558670297 | DRAFT_00965 | KEGG_module    | M00248: Putative antibiotic transport system                                 |          |
| 2558670297 | DRAFT_00965 | COG_category   | [V] Defense mechanisms                                                       |          |
| 2558670297 | DRAFT_00965 | COG0842        | ABC-type multidrug transport system, permease component                      | 1.00E-10 |
| 2558670297 | DRAFT_00965 | pfam01061      | ABC2_membrane                                                                | 2.00E-29 |
| 2558670297 | DRAFT_00965 | TIGR00025      | ABC transporter efflux protein, DrrB family                                  | 2.30E-22 |
| 2558670297 | DRAFT_00965 | TIGR01247      | daunorubicin resistance ABC transporter membrane protein                     | 1.60E-43 |
| 2558670297 | DRAFT_00965 | KO:K09686      | antibiotic transport system permease protein                                 | 0.00E+00 |
| 2558670297 | DRAFT_00965 | Locus_type     | CDS                                                                          |          |
| 2558670297 | DRAFT_00965 | Product_name   | ABC-type multidrug transport system, permease component                      |          |
| 2558670297 | DRAFT_00965 | Scaffold       | DRAFT_contig_70_97_len_33135_read_count_580268.16                            |          |
| 2558670297 | DRAFT_00965 | Coordinates    | 15900..16862(-)                                                              |          |
| 2558670297 | DRAFT_00965 | DNA_length     | 963bp                                                                        |          |
| 2558670297 | DRAFT_00965 | Protein_length | 320aa                                                                        |          |

|            |             |                |                                                             |           |
|------------|-------------|----------------|-------------------------------------------------------------|-----------|
| 2558670297 | DRAFT_00965 | GC             |                                                             | 0.56      |
| 2558670297 | DRAFT_00965 | Transmembrane  | Yes                                                         |           |
| 2558670298 | DRAFT_00966 | KEGG_module    | M00248: Putative antibiotic transport system                |           |
| 2558670298 | DRAFT_00966 | COG_category   | [V] Defense mechanisms                                      |           |
| 2558670298 | DRAFT_00966 | COG1131        | ABC-type multidrug transport system, ATPase component       | 8.00E-79  |
| 2558670298 | DRAFT_00966 | pfam00005      | ABC_tran                                                    | 6.10E-29  |
| 2558670298 | DRAFT_00966 | pfam13732      | DUF4162                                                     | 3.20E-08  |
| 2558670298 | DRAFT_00966 | TIGR01188      | daunorubicin resistance ABC transporter ATP-binding subunit | 9.20E-120 |
| 2558670298 | DRAFT_00966 | KO:K09687      | antibiotic transport system ATP-binding protein             | 0.00E+00  |
| 2558670298 | DRAFT_00966 | Locus_type     | CDS                                                         |           |
| 2558670298 | DRAFT_00966 | Product_name   | daunorubicin resistance ABC transporter ATP-binding subunit |           |
| 2558670298 | DRAFT_00966 | Scaffold       | DRAFT_contig_70_97_len_33135_read_count_580268.16           |           |
| 2558670298 | DRAFT_00966 | Coordinates    | 16872..17882(-)                                             |           |
| 2558670298 | DRAFT_00966 | DNA_length     | 1011bp                                                      |           |
| 2558670298 | DRAFT_00966 | Protein_length | 336aa                                                       |           |
| 2558670298 | DRAFT_00966 | GC             |                                                             | 0.57      |
| 2558670299 | DRAFT_00967 | COG_category   | [K] Transcription                                           |           |
| 2558670299 | DRAFT_00967 | COG1695        | Predicted transcriptional regulators                        | 2.00E-06  |
| 2558670299 | DRAFT_00967 | pfam03551      | PadR                                                        | 4.10E-08  |
| 2558670299 | DRAFT_00967 | Locus_type     | CDS                                                         |           |
| 2558670299 | DRAFT_00967 | Product_name   | Predicted transcriptional regulators                        |           |
| 2558670299 | DRAFT_00967 | Scaffold       | DRAFT_contig_70_97_len_33135_read_count_580268.16           |           |
| 2558670299 | DRAFT_00967 | Coordinates    | 17879..18214(-)                                             |           |
| 2558670299 | DRAFT_00967 | DNA_length     | 336bp                                                       |           |
| 2558670299 | DRAFT_00967 | Protein_length | 111aa                                                       |           |
| 2558670299 | DRAFT_00967 | GC             |                                                             | 0.59      |
| 2558670300 | DRAFT_00968 | Locus_type     | CDS                                                         |           |
| 2558670300 | DRAFT_00968 | Product_name   | hypothetical protein                                        |           |
| 2558670300 | DRAFT_00968 | Scaffold       | DRAFT_contig_70_97_len_33135_read_count_580268.16           |           |
| 2558670300 | DRAFT_00968 | Coordinates    | 18857..19060(+)                                             |           |
| 2558670300 | DRAFT_00968 | DNA_length     | 204bp                                                       |           |

|            |             |                |                                                   |          |
|------------|-------------|----------------|---------------------------------------------------|----------|
| 2558670300 | DRAFT_00968 | Protein_length | 67aa                                              |          |
| 2558670300 | DRAFT_00968 | GC             |                                                   | 0.52     |
| 2558670300 | DRAFT_00968 | Transmembrane  | Yes                                               |          |
| 2558670301 | DRAFT_00969 | Locus_type     | CDS                                               |          |
| 2558670301 | DRAFT_00969 | Product_name   | hypothetical protein                              |          |
| 2558670301 | DRAFT_00969 | Scaffold       | DRAFT_contig_70_97_len_33135_read_count_580268.16 |          |
| 2558670301 | DRAFT_00969 | Coordinates    | 19183..19941(+)                                   |          |
| 2558670301 | DRAFT_00969 | DNA_length     | 759bp                                             |          |
| 2558670301 | DRAFT_00969 | Protein_length | 252aa                                             |          |
| 2558670301 | DRAFT_00969 | GC             |                                                   | 0.51     |
| 2558670302 | DRAFT_00970 | COG_category   | [L] Replication, recombination and repair         |          |
| 2558670302 | DRAFT_00970 | COG3316        | Transposase and inactivated derivatives           | 2.00E-13 |
| 2558670302 | DRAFT_00970 | pfam13610      | DDE_Tnp_IS240                                     | 1.60E-18 |
| 2558670302 | DRAFT_00970 | Locus_type     | CDS                                               |          |
| 2558670302 | DRAFT_00970 | Product_name   | Transposase and inactivated derivatives           |          |
| 2558670302 | DRAFT_00970 | Scaffold       | DRAFT_contig_70_97_len_33135_read_count_580268.16 |          |
| 2558670302 | DRAFT_00970 | Coordinates    | 19896..21056(+)                                   |          |
| 2558670302 | DRAFT_00970 | DNA_length     | 1161bp                                            |          |
| 2558670302 | DRAFT_00970 | Protein_length | 386aa                                             |          |
| 2558670302 | DRAFT_00970 | GC             |                                                   | 0.51     |
| 2558670303 | DRAFT_00971 | Metacyc        | PWY-5386: methylglyoxal degradation I             |          |
| 2558670303 | DRAFT_00971 | COG_category   | [R] General function prediction only              |          |
| 2558670303 | DRAFT_00971 | COG0491        | Zn-dependent hydrolases, including glyoxylases    | 6.00E-24 |
| 2558670303 | DRAFT_00971 | pfam00753      | Lactamase_B                                       | 4.20E-23 |
| 2558670303 | DRAFT_00971 | EC:3.1.2.6     | Hydroxyacylglutathione hydrolase.                 |          |
| 2558670303 | DRAFT_00971 | KO:K01069      | hydroxyacylglutathione hydrolase [EC:3.1.2.6]     | 3.80E-37 |
| 2558670303 | DRAFT_00971 | Locus_type     | CDS                                               |          |
| 2558670303 | DRAFT_00971 | Product_name   | Zn-dependent hydrolases, including glyoxylases    |          |
| 2558670303 | DRAFT_00971 | Scaffold       | DRAFT_contig_70_97_len_33135_read_count_580268.16 |          |
| 2558670303 | DRAFT_00971 | Coordinates    | 21270..21875(-)                                   |          |
| 2558670303 | DRAFT_00971 | DNA_length     | 606bp                                             |          |

|            |             |                |                                                         |          |
|------------|-------------|----------------|---------------------------------------------------------|----------|
| 2558670303 | DRAFT_00971 | Protein_length | 201aa                                                   |          |
| 2558670303 | DRAFT_00971 | GC             |                                                         | 0.58     |
| 2558670304 | DRAFT_00972 | Locus_type     | CDS                                                     |          |
| 2558670304 | DRAFT_00972 | Product_name   | hypothetical protein                                    |          |
| 2558670304 | DRAFT_00972 | Scaffold       | DRAFT_contig_70_97_len_33135_read_count_580268.16       |          |
| 2558670304 | DRAFT_00972 | Coordinates    | 22111..22293(-)                                         |          |
| 2558670304 | DRAFT_00972 | DNA_length     | 183bp                                                   |          |
| 2558670304 | DRAFT_00972 | Protein_length | 60aa                                                    |          |
| 2558670304 | DRAFT_00972 | GC             |                                                         | 0.51     |
| 2558670305 | DRAFT_00973 | COG_category   | [P] Inorganic ion transport and metabolism              |          |
| 2558670305 | DRAFT_00973 | COG1392        | Phosphate transport regulator (distant homolog of PhoU) | 7.00E-18 |
| 2558670305 | DRAFT_00973 | pfam01865      | PhoU_div                                                | 7.00E-20 |
| 2558670305 | DRAFT_00973 | KO:K07220      | hypothetical protein                                    | 0.00E+00 |
| 2558670305 | DRAFT_00973 | Locus_type     | CDS                                                     |          |
| 2558670305 | DRAFT_00973 | Product_name   | Phosphate transport regulator (distant homolog of PhoU) |          |
| 2558670305 | DRAFT_00973 | Scaffold       | DRAFT_contig_70_97_len_33135_read_count_580268.16       |          |
| 2558670305 | DRAFT_00973 | Coordinates    | 22490..23113(+)                                         |          |
| 2558670305 | DRAFT_00973 | DNA_length     | 624bp                                                   |          |
| 2558670305 | DRAFT_00973 | Protein_length | 207aa                                                   |          |
| 2558670305 | DRAFT_00973 | GC             |                                                         | 0.52     |
| 2558670306 | DRAFT_00974 | COG_category   | [P] Inorganic ion transport and metabolism              |          |
| 2558670306 | DRAFT_00974 | COG0306        | Phosphate/sulphate permeases                            | 1.00E-54 |
| 2558670306 | DRAFT_00974 | pfam01384      | PHO4                                                    | 1.90E-93 |
| 2558670306 | DRAFT_00974 | KO:K03306      | inorganic phosphate transporter, PiT family             | 0.00E+00 |
| 2558670306 | DRAFT_00974 | Locus_type     | CDS                                                     |          |
| 2558670306 | DRAFT_00974 | Product_name   | Phosphate/sulphate permeases                            |          |
| 2558670306 | DRAFT_00974 | Scaffold       | DRAFT_contig_70_97_len_33135_read_count_580268.16       |          |
| 2558670306 | DRAFT_00974 | Coordinates    | 23124..24110(+)                                         |          |
| 2558670306 | DRAFT_00974 | DNA_length     | 987bp                                                   |          |
| 2558670306 | DRAFT_00974 | Protein_length | 328aa                                                   |          |
| 2558670306 | DRAFT_00974 | GC             |                                                         | 0.58     |



|            |             |                |                                                    |          |
|------------|-------------|----------------|----------------------------------------------------|----------|
| 2558670306 | DRAFT_00974 | Transmembrane  | Yes                                                |          |
| 2558670307 | DRAFT_00975 | pfam03551      | PadR                                               | 7.00E-17 |
| 2558670307 | DRAFT_00975 | ITERM:01890    | transcriptional regulator, PadR family             |          |
| 2558670307 | DRAFT_00975 | Locus_type     | CDS                                                |          |
| 2558670307 | DRAFT_00975 | Product_name   | transcriptional regulator, PadR family             |          |
| 2558670307 | DRAFT_00975 | Scaffold       | DRAFT_contig_70_97_len_33135_read_count_580268.16  |          |
| 2558670307 | DRAFT_00975 | Coordinates    | 24209..24721(+)                                    |          |
| 2558670307 | DRAFT_00975 | DNA_length     | 513bp                                              |          |
| 2558670307 | DRAFT_00975 | Protein_length | 170aa                                              |          |
| 2558670307 | DRAFT_00975 | GC             |                                                    | 0.55     |
| 2558670308 | DRAFT_00976 | Metacyc        | PWY-7076: 3,5-dimethoxytoluene biosynthesis        |          |
| 2558670308 | DRAFT_00976 | Metacyc        | PWY-6334: L-dopa degradation                       |          |
| 2558670308 | DRAFT_00976 | Metacyc        | PWY-5426: betaxanthin biosynthesis                 |          |
| 2558670308 | DRAFT_00976 | Metacyc        | PWY-6342: noradrenaline and adrenaline degradation |          |
| 2558670308 | DRAFT_00976 | Metacyc        | PWY6666-2: dopamine degradation                    |          |
| 2558670308 | DRAFT_00976 | COG_category   | [R] General function prediction only               |          |
| 2558670308 | DRAFT_00976 | COG4122        | Predicted O-methyltransferase                      | 2.00E-32 |
| 2558670308 | DRAFT_00976 | pfam01596      | Methyltransf_3                                     | 2.50E-27 |
| 2558670308 | DRAFT_00976 | EC:2.1.1.6     | Catechol O-methyltransferase.                      |          |
| 2558670308 | DRAFT_00976 | KO:K00545      | catechol O-methyltransferase [EC:2.1.1.6]          | 1.20E-25 |
| 2558670308 | DRAFT_00976 | Locus_type     | CDS                                                |          |
| 2558670308 | DRAFT_00976 | Product_name   | Predicted O-methyltransferase                      |          |
| 2558670308 | DRAFT_00976 | Scaffold       | DRAFT_contig_70_97_len_33135_read_count_580268.16  |          |
| 2558670308 | DRAFT_00976 | Coordinates    | 24737..25321(+)                                    |          |
| 2558670308 | DRAFT_00976 | DNA_length     | 585bp                                              |          |
| 2558670308 | DRAFT_00976 | Protein_length | 194aa                                              |          |
| 2558670308 | DRAFT_00976 | GC             |                                                    | 0.58     |
| 2558670309 | DRAFT_00977 | Locus_type     | CDS                                                |          |
| 2558670309 | DRAFT_00977 | Product_name   | hypothetical protein                               |          |
| 2558670309 | DRAFT_00977 | Scaffold       | DRAFT_contig_70_97_len_33135_read_count_580268.16  |          |
| 2558670309 | DRAFT_00977 | Coordinates    | 25474..25854(-)                                    |          |

|            |             |                |                                                      |          |
|------------|-------------|----------------|------------------------------------------------------|----------|
| 2558670309 | DRAFT_00977 | DNA_length     | 381bp                                                |          |
| 2558670309 | DRAFT_00977 | Protein_length | 126aa                                                |          |
| 2558670309 | DRAFT_00977 | GC             |                                                      | 0.57     |
| 2558670310 | DRAFT_00978 | COG_category   | [R] General function prediction only                 |          |
| 2558670310 | DRAFT_00978 | COG3324        | Predicted enzyme related to lactoylglutathione lyase | 8.00E-17 |
| 2558670310 | DRAFT_00978 | pfam12681      | Glyoxalase_2                                         | 1.20E-12 |
| 2558670310 | DRAFT_00978 | Locus_type     | CDS                                                  |          |
| 2558670310 | DRAFT_00978 | Product_name   | Predicted enzyme related to lactoylglutathione lyase |          |
| 2558670310 | DRAFT_00978 | Scaffold       | DRAFT_contig_70_97_len_33135_read_count_580268.16    |          |
| 2558670310 | DRAFT_00978 | Coordinates    | 26061..26450(+)                                      |          |
| 2558670310 | DRAFT_00978 | DNA_length     | 390bp                                                |          |
| 2558670310 | DRAFT_00978 | Protein_length | 129aa                                                |          |
| 2558670310 | DRAFT_00978 | GC             |                                                      | 0.56     |
| 2558670311 | DRAFT_00979 | COG_category   | [E] Amino acid transport and metabolism              |          |
| 2558670311 | DRAFT_00979 | COG0006        | Xaa-Pro aminopeptidase                               | 6.00E-50 |
| 2558670311 | DRAFT_00979 | pfam00557      | Peptidase_M24                                        | 1.60E-28 |
| 2558670311 | DRAFT_00979 | pfam01321      | Creatinase_N                                         | 1.30E-10 |
| 2558670311 | DRAFT_00979 | Locus_type     | CDS                                                  |          |
| 2558670311 | DRAFT_00979 | Product_name   | Xaa-Pro aminopeptidase                               |          |
| 2558670311 | DRAFT_00979 | Scaffold       | DRAFT_contig_70_97_len_33135_read_count_580268.16    |          |
| 2558670311 | DRAFT_00979 | Coordinates    | 26655..27743(-)                                      |          |
| 2558670311 | DRAFT_00979 | DNA_length     | 1089bp                                               |          |
| 2558670311 | DRAFT_00979 | Protein_length | 362aa                                                |          |
| 2558670311 | DRAFT_00979 | GC             |                                                      | 0.57     |
| 2558670312 | DRAFT_00980 | pfam03745      | DUF309                                               | 2.50E-20 |
| 2558670312 | DRAFT_00980 | KO:K09763      | hypothetical protein                                 | 5.90E-25 |
| 2558670312 | DRAFT_00980 | Locus_type     | CDS                                                  |          |
| 2558670312 | DRAFT_00980 | Product_name   | Uncharacterized conserved protein                    |          |
| 2558670312 | DRAFT_00980 | Scaffold       | DRAFT_contig_70_97_len_33135_read_count_580268.16    |          |
| 2558670312 | DRAFT_00980 | Coordinates    | 27884..28444(+)                                      |          |
| 2558670312 | DRAFT_00980 | DNA_length     | 561bp                                                |          |

|            |             |                |                 |                                                   |          |
|------------|-------------|----------------|-----------------|---------------------------------------------------|----------|
| 2558670312 | DRAFT_00980 | Protein_length |                 | 186aa                                             |          |
| 2558670312 | DRAFT_00980 | GC             |                 |                                                   | 0.57     |
| 2558670313 | DRAFT_00981 | Locus_type     |                 | CDS                                               |          |
| 2558670313 | DRAFT_00981 | Product_name   |                 | hypothetical protein                              |          |
| 2558670313 | DRAFT_00981 | Scaffold       |                 | DRAFT_contig_70_97_len_33135_read_count_580268.16 |          |
| 2558670313 | DRAFT_00981 | Coordinates    |                 | 28617..29267(-)                                   |          |
| 2558670313 | DRAFT_00981 | DNA_length     |                 | 651bp                                             |          |
| 2558670313 | DRAFT_00981 | Protein_length |                 | 216aa                                             |          |
| 2558670313 | DRAFT_00981 | GC             |                 |                                                   | 0.54     |
| 2558670314 | DRAFT_00982 | Locus_type     |                 | CDS                                               |          |
| 2558670314 | DRAFT_00982 | Product_name   |                 | hypothetical protein                              |          |
| 2558670314 | DRAFT_00982 | Scaffold       |                 | DRAFT_contig_70_97_len_33135_read_count_580268.16 |          |
| 2558670314 | DRAFT_00982 | Coordinates    |                 | 29301..29771(-)                                   |          |
| 2558670314 | DRAFT_00982 | DNA_length     |                 | 471bp                                             |          |
| 2558670314 | DRAFT_00982 | Protein_length |                 | 156aa                                             |          |
| 2558670314 | DRAFT_00982 | GC             |                 |                                                   | 0.55     |
| 2558670314 | DRAFT_00982 | Transmembrane  |                 | Yes                                               |          |
| 2558670315 | DRAFT_00983 | Locus_type     |                 | CDS                                               |          |
| 2558670315 | DRAFT_00983 | Product_name   |                 | hypothetical protein                              |          |
| 2558670315 | DRAFT_00983 | Scaffold       |                 | DRAFT_contig_70_97_len_33135_read_count_580268.16 |          |
| 2558670315 | DRAFT_00983 | Coordinates    |                 | 29740..30111(-)                                   |          |
| 2558670315 | DRAFT_00983 | DNA_length     |                 | 372bp                                             |          |
| 2558670315 | DRAFT_00983 | Protein_length |                 | 123aa                                             |          |
| 2558670315 | DRAFT_00983 | GC             |                 |                                                   | 0.51     |
| 2558670315 | DRAFT_00983 | Transmembrane  |                 | Yes                                               |          |
| 2558670316 | DRAFT_00984 | pfam12730      | ABC2_membrane_4 |                                                   | 2.10E-06 |
| 2558670316 | DRAFT_00984 | Locus_type     |                 | CDS                                               |          |
| 2558670316 | DRAFT_00984 | Product_name   |                 | ABC-2 family transporter protein                  |          |
| 2558670316 | DRAFT_00984 | Scaffold       |                 | DRAFT_contig_70_97_len_33135_read_count_580268.16 |          |
| 2558670316 | DRAFT_00984 | Coordinates    |                 | 30321..31967(-)                                   |          |

|            |             |                |                                                       |          |
|------------|-------------|----------------|-------------------------------------------------------|----------|
| 2558670316 | DRAFT_00984 | DNA_length     | 1647bp                                                |          |
| 2558670316 | DRAFT_00984 | Protein_length | 548aa                                                 |          |
| 2558670316 | DRAFT_00984 | GC             |                                                       | 0.57     |
| 2558670316 | DRAFT_00984 | Transmembrane  | Yes                                                   |          |
|            |             |                |                                                       |          |
| 2558670317 | DRAFT_00985 | KEGG_module    | M00254: ABC-2 type transport system                   |          |
| 2558670317 | DRAFT_00985 | COG_category   | [V] Defense mechanisms                                |          |
| 2558670317 | DRAFT_00985 | COG1131        | ABC-type multidrug transport system, ATPase component | 6.00E-65 |
| 2558670317 | DRAFT_00985 | pfam00005      | ABC_tran                                              | 1.30E-28 |
| 2558670317 | DRAFT_00985 | KO:K01990      | ABC-2 type transport system ATP-binding protein       | 0.00E+00 |
| 2558670317 | DRAFT_00985 | Locus_type     | CDS                                                   |          |
| 2558670317 | DRAFT_00985 | Product_name   | ABC-type multidrug transport system, ATPase component |          |
| 2558670317 | DRAFT_00985 | Scaffold       | DRAFT_contig_70_97_len_33135_read_count_580268.16     |          |
| 2558670317 | DRAFT_00985 | Coordinates    | 31964..32755(-)                                       |          |
| 2558670317 | DRAFT_00985 | DNA_length     | 792bp                                                 |          |
| 2558670317 | DRAFT_00985 | Protein_length | 263aa                                                 |          |
| 2558670317 | DRAFT_00985 | GC             |                                                       | 0.55     |
|            |             |                |                                                       |          |
| 2558670318 | DRAFT_00986 | pfam12695      | Abhydrolase_5                                         | 1.00E-11 |
| 2558670318 | DRAFT_00986 | Locus_type     | CDS                                                   |          |
| 2558670318 | DRAFT_00986 | Product_name   | Dienelactone hydrolase and related enzymes            |          |
| 2558670318 | DRAFT_00986 | Scaffold       | DRAFT_contig_70_99_len_32598_read_count_581408.17     |          |
| 2558670318 | DRAFT_00986 | Coordinates    | 1..450(+)                                             |          |
| 2558670318 | DRAFT_00986 | DNA_length     | 450bp                                                 |          |
| 2558670318 | DRAFT_00986 | Protein_length | 149aa                                                 |          |
| 2558670318 | DRAFT_00986 | GC             |                                                       | 0.64     |
|            |             |                |                                                       |          |
| 2558670319 | DRAFT_00987 | Locus_type     | CDS                                                   |          |
| 2558670319 | DRAFT_00987 | Product_name   | hypothetical protein                                  |          |
| 2558670319 | DRAFT_00987 | Scaffold       | DRAFT_contig_70_99_len_32598_read_count_581408.17     |          |
| 2558670319 | DRAFT_00987 | Coordinates    | 647..1195(+)                                          |          |
| 2558670319 | DRAFT_00987 | DNA_length     | 549bp                                                 |          |
| 2558670319 | DRAFT_00987 | Protein_length | 182aa                                                 |          |
| 2558670319 | DRAFT_00987 | GC             |                                                       | 0.52     |

|            |             |                |                |                                                   |          |
|------------|-------------|----------------|----------------|---------------------------------------------------|----------|
| 2558670320 | DRAFT_00988 | pfam00583      | Acetyltransf_1 |                                                   | 4.70E-05 |
| 2558670320 | DRAFT_00988 | Locus_type     |                | CDS                                               |          |
| 2558670320 | DRAFT_00988 | Product_name   |                | Acetyltransferase (GNAT) family                   |          |
| 2558670320 | DRAFT_00988 | Scaffold       |                | DRAFT_contig_70_99_len_32598_read_count_581408.17 |          |
| 2558670320 | DRAFT_00988 | Coordinates    |                | 1281..2069(-)                                     |          |
| 2558670320 | DRAFT_00988 | DNA_length     |                | 789bp                                             |          |
| 2558670320 | DRAFT_00988 | Protein_length |                | 262aa                                             |          |
| 2558670320 | DRAFT_00988 | GC             |                |                                                   | 0.55     |
| 2558670321 | DRAFT_00989 | Locus_type     |                | CDS                                               |          |
| 2558670321 | DRAFT_00989 | Product_name   |                | hypothetical protein                              |          |
| 2558670321 | DRAFT_00989 | Scaffold       |                | DRAFT_contig_70_99_len_32598_read_count_581408.17 |          |
| 2558670321 | DRAFT_00989 | Coordinates    |                | 2063..3235(-)                                     |          |
| 2558670321 | DRAFT_00989 | DNA_length     |                | 1173bp                                            |          |
| 2558670321 | DRAFT_00989 | Protein_length |                | 390aa                                             |          |
| 2558670321 | DRAFT_00989 | GC             |                |                                                   | 0.55     |
| 2558670322 | DRAFT_00990 | Locus_type     |                | CDS                                               |          |
| 2558670322 | DRAFT_00990 | Product_name   |                | hypothetical protein                              |          |
| 2558670322 | DRAFT_00990 | Scaffold       |                | DRAFT_contig_70_99_len_32598_read_count_581408.17 |          |
| 2558670322 | DRAFT_00990 | Coordinates    |                | 3311..4387(-)                                     |          |
| 2558670322 | DRAFT_00990 | DNA_length     |                | 1077bp                                            |          |
| 2558670322 | DRAFT_00990 | Protein_length |                | 358aa                                             |          |
| 2558670322 | DRAFT_00990 | GC             |                |                                                   | 0.58     |
| 2558670322 | DRAFT_00990 | Signal_peptide |                | Yes                                               |          |
| 2558670322 | DRAFT_00990 | Transmembrane  |                | Yes                                               |          |
| 2558670323 | DRAFT_00991 | Locus_type     |                | CDS                                               |          |
| 2558670323 | DRAFT_00991 | Product_name   |                | hypothetical protein                              |          |
| 2558670323 | DRAFT_00991 | Scaffold       |                | DRAFT_contig_70_99_len_32598_read_count_581408.17 |          |
| 2558670323 | DRAFT_00991 | Coordinates    |                | 4377..5942(-)                                     |          |
| 2558670323 | DRAFT_00991 | DNA_length     |                | 1566bp                                            |          |
| 2558670323 | DRAFT_00991 | Protein_length |                | 521aa                                             |          |

|            |             |                |                                                                                  |          |
|------------|-------------|----------------|----------------------------------------------------------------------------------|----------|
| 2558670323 | DRAFT_00991 | GC             |                                                                                  | 0.57     |
| 2558670324 | DRAFT_00992 | Locus_type     | CDS                                                                              |          |
| 2558670324 | DRAFT_00992 | Product_name   | hypothetical protein                                                             |          |
| 2558670324 | DRAFT_00992 | Scaffold       | DRAFT_contig_70_99_len_32598_read_count_581408.17                                |          |
| 2558670324 | DRAFT_00992 | Coordinates    | 6416..7789(+)                                                                    |          |
| 2558670324 | DRAFT_00992 | DNA_length     | 1374bp                                                                           |          |
| 2558670324 | DRAFT_00992 | Protein_length | 457aa                                                                            |          |
| 2558670324 | DRAFT_00992 | GC             |                                                                                  | 0.54     |
| 2558670324 | DRAFT_00992 | Transmembrane  | Yes                                                                              |          |
| 2558670325 | DRAFT_00993 | COG_category   | [E] Amino acid transport and metabolism                                          |          |
| 2558670325 | DRAFT_00993 | COG1164        | Oligoendopeptidase F                                                             | 3.00E-58 |
| 2558670325 | DRAFT_00993 | pfam01432      | Peptidase_M3                                                                     | 5.60E-33 |
| 2558670325 | DRAFT_00993 | EC:3.4.24.-    | Hydrolases. Acting on peptide bonds (peptide hydrolases). Metalloendopeptidases. |          |
| 2558670325 | DRAFT_00993 | TIGR02289      | oligoendopeptidase, M3 family                                                    | 0.00E+00 |
| 2558670325 | DRAFT_00993 | KO:K08602      | oligoendopeptidase F [EC:3.4.24.-]                                               | 0.00E+00 |
| 2558670325 | DRAFT_00993 | Locus_type     | CDS                                                                              |          |
| 2558670325 | DRAFT_00993 | Product_name   | oligoendopeptidase, M3 family                                                    |          |
| 2558670325 | DRAFT_00993 | Scaffold       | DRAFT_contig_70_99_len_32598_read_count_581408.17                                |          |
| 2558670325 | DRAFT_00993 | Coordinates    | 7878..9608(-)                                                                    |          |
| 2558670325 | DRAFT_00993 | DNA_length     | 1731bp                                                                           |          |
| 2558670325 | DRAFT_00993 | Protein_length | 576aa                                                                            |          |
| 2558670325 | DRAFT_00993 | GC             |                                                                                  | 0.57     |
| 2558670325 | DRAFT_00993 | Transmembrane  | Yes                                                                              |          |
| 2558670326 | DRAFT_00994 | pfam06224      | HTH_42                                                                           | 2.20E-49 |
| 2558670326 | DRAFT_00994 | Locus_type     | CDS                                                                              |          |
| 2558670326 | DRAFT_00994 | Product_name   | Winged helix DNA-binding domain                                                  |          |
| 2558670326 | DRAFT_00994 | Scaffold       | DRAFT_contig_70_99_len_32598_read_count_581408.17                                |          |
| 2558670326 | DRAFT_00994 | Coordinates    | 9906..11027(+)                                                                   |          |
| 2558670326 | DRAFT_00994 | DNA_length     | 1122bp                                                                           |          |
| 2558670326 | DRAFT_00994 | Protein_length | 373aa                                                                            |          |
| 2558670326 | DRAFT_00994 | GC             |                                                                                  | 0.62     |

|            |             |                |                                                                                  |                                                                      |          |
|------------|-------------|----------------|----------------------------------------------------------------------------------|----------------------------------------------------------------------|----------|
| 2558670327 | DRAFT_00995 | Locus_type     |                                                                                  | CDS                                                                  |          |
| 2558670327 | DRAFT_00995 | Product_name   |                                                                                  | hypothetical protein                                                 |          |
| 2558670327 | DRAFT_00995 | Scaffold       |                                                                                  | DRAFT_contig_70_99_len_32598_read_count_581408.17                    |          |
| 2558670327 | DRAFT_00995 | Coordinates    |                                                                                  | 11096..11698(-)                                                      |          |
| 2558670327 | DRAFT_00995 | DNA_length     |                                                                                  | 603bp                                                                |          |
| 2558670327 | DRAFT_00995 | Protein_length |                                                                                  | 200aa                                                                |          |
| 2558670327 | DRAFT_00995 | GC             |                                                                                  |                                                                      | 0.54     |
| 2558670328 | DRAFT_00996 | pfam05977      | MFS_3                                                                            |                                                                      | 3.80E-41 |
| 2558670328 | DRAFT_00996 | Locus_type     |                                                                                  | CDS                                                                  |          |
| 2558670328 | DRAFT_00996 | Product_name   |                                                                                  | Sugar phosphate permease                                             |          |
| 2558670328 | DRAFT_00996 | Scaffold       |                                                                                  | DRAFT_contig_70_99_len_32598_read_count_581408.17                    |          |
| 2558670328 | DRAFT_00996 | Coordinates    |                                                                                  | 11743..13011(+)                                                      |          |
| 2558670328 | DRAFT_00996 | DNA_length     |                                                                                  | 1269bp                                                               |          |
| 2558670328 | DRAFT_00996 | Protein_length |                                                                                  | 422aa                                                                |          |
| 2558670328 | DRAFT_00996 | GC             |                                                                                  |                                                                      | 0.6      |
| 2558670328 | DRAFT_00996 | Transmembrane  |                                                                                  | Yes                                                                  |          |
| 2558670329 | DRAFT_00997 | KEGG_module    | M00236: Putative polar amino acid transport system                               |                                                                      |          |
| 2558670329 | DRAFT_00997 | COG_category   | [T] Signal transduction mechanisms                                               |                                                                      |          |
| 2558670329 | DRAFT_00997 | COG_category   | [E] Amino acid transport and metabolism                                          |                                                                      |          |
| 2558670329 | DRAFT_00997 | COG0834        | ABC-type amino acid transport/signal transduction systems, periplasmic           |                                                                      | 7.00E-32 |
| 2558670329 | DRAFT_00997 | pfam00497      | SBP_bac_3                                                                        |                                                                      | 1.40E-56 |
| 2558670329 | DRAFT_00997 | KO:K02030      | polar amino acid transport system substrate-binding protein                      |                                                                      | 0.00E+00 |
| 2558670329 | DRAFT_00997 | ITERM:05951    | amino acid ABC transporter substrate-binding protein, PAAT family (TC 3.A.1.3.-) |                                                                      |          |
| 2558670329 | DRAFT_00997 | Locus_type     |                                                                                  | CDS                                                                  |          |
| 2558670329 | DRAFT_00997 | Product_name   |                                                                                  | amino acid ABC transporter substrate-binding protein, PAAT family (T |          |
| 2558670329 | DRAFT_00997 | Scaffold       |                                                                                  | DRAFT_contig_70_99_len_32598_read_count_581408.17                    |          |
| 2558670329 | DRAFT_00997 | Coordinates    |                                                                                  | 13325..14095(+)                                                      |          |
| 2558670329 | DRAFT_00997 | DNA_length     |                                                                                  | 771bp                                                                |          |
| 2558670329 | DRAFT_00997 | Protein_length |                                                                                  | 256aa                                                                |          |
| 2558670329 | DRAFT_00997 | GC             |                                                                                  |                                                                      | 0.59     |
| 2558670329 | DRAFT_00997 | Transmembrane  |                                                                                  | Yes                                                                  |          |

|            |             |                |                                                                           |          |
|------------|-------------|----------------|---------------------------------------------------------------------------|----------|
| 2558670330 | DRAFT_00998 | KEGG_module    | M00236: Putative polar amino acid transport system                        |          |
| 2558670330 | DRAFT_00998 | COG_category   | [E] Amino acid transport and metabolism                                   |          |
| 2558670330 | DRAFT_00998 | COG0765        | ABC-type amino acid transport system, permease component                  | 1.00E-41 |
| 2558670330 | DRAFT_00998 | pfam00528      | BPD_transp_1                                                              | 2.60E-15 |
| 2558670330 | DRAFT_00998 | TIGR01726      | amine acid ABC transporter, permease protein, 3-TM region, His/Glu/G      | 2.50E-27 |
| 2558670330 | DRAFT_00998 | KO:K02029      | polar amino acid transport system permease protein                        | 6.70E-44 |
| 2558670330 | DRAFT_00998 | ITERM:06081    | amino acid ABC transporter membrane protein 1, PAAT family (TC 3.A.1.3.-) |          |
| 2558670330 | DRAFT_00998 | Locus_type     | CDS                                                                       |          |
| 2558670330 | DRAFT_00998 | Product_name   | amino acid ABC transporter membrane protein 1, PAAT family (TC 3.A        |          |
| 2558670330 | DRAFT_00998 | Scaffold       | DRAFT_contig_70_99_len_32598_read_count_581408.17                         |          |
| 2558670330 | DRAFT_00998 | Coordinates    | 14118..14789(+)                                                           |          |
| 2558670330 | DRAFT_00998 | DNA_length     | 672bp                                                                     |          |
| 2558670330 | DRAFT_00998 | Protein_length | 223aa                                                                     |          |
| 2558670330 | DRAFT_00998 | GC             |                                                                           | 0.6      |
| 2558670330 | DRAFT_00998 | Transmembrane  | Yes                                                                       |          |
| 2558670331 | DRAFT_00999 | KEGG_module    | M00236: Putative polar amino acid transport system                        |          |
| 2558670331 | DRAFT_00999 | COG_category   | [E] Amino acid transport and metabolism                                   |          |
| 2558670331 | DRAFT_00999 | COG1126        | ABC-type polar amino acid transport system, ATPase component              | 4.00E-87 |
| 2558670331 | DRAFT_00999 | pfam00005      | ABC_tran                                                                  | 3.00E-33 |
| 2558670331 | DRAFT_00999 | EC:3.6.3.21    | Polar-amino-acid-transporting ATPase.                                     |          |
| 2558670331 | DRAFT_00999 | KO:K02028      | polar amino acid transport system ATP-binding protein [EC:3.6.3.21]       | 0.00E+00 |
| 2558670331 | DRAFT_00999 | Locus_type     | CDS                                                                       |          |
| 2558670331 | DRAFT_00999 | Product_name   | amino acid ABC transporter ATP-binding protein, PAAT family (TC 3.A.      |          |
| 2558670331 | DRAFT_00999 | Scaffold       | DRAFT_contig_70_99_len_32598_read_count_581408.17                         |          |
| 2558670331 | DRAFT_00999 | Coordinates    | 14786..15556(+)                                                           |          |
| 2558670331 | DRAFT_00999 | DNA_length     | 771bp                                                                     |          |
| 2558670331 | DRAFT_00999 | Protein_length | 256aa                                                                     |          |
| 2558670331 | DRAFT_00999 | GC             |                                                                           | 0.61     |
| 2558670332 | DRAFT_01000 | KEGG_module    | M00236: Putative polar amino acid transport system                        |          |
| 2558670332 | DRAFT_01000 | COG_category   | [E] Amino acid transport and metabolism                                   |          |
| 2558670332 | DRAFT_01000 | COG0765        | ABC-type amino acid transport system, permease component                  | 4.00E-48 |



|            |             |                |                                                                        |          |
|------------|-------------|----------------|------------------------------------------------------------------------|----------|
| 2558670332 | DRAFT_01000 | pfam00528      | BPD_transp_1                                                           | 4.00E-12 |
| 2558670332 | DRAFT_01000 | TIGR01726      | amine acid ABC transporter, permease protein, 3-TM region, His/Glu/G   | 4.70E-37 |
| 2558670332 | DRAFT_01000 | KO:K02029      | polar amino acid transport system permease protein                     | 0.00E+00 |
| 2558670332 | DRAFT_01000 | Locus_type     | CDS                                                                    |          |
| 2558670332 | DRAFT_01000 | Product_name   | amine acid ABC transporter, permease protein, 3-TM region, His/Glu/    |          |
| 2558670332 | DRAFT_01000 | Scaffold       | DRAFT_contig_70_99_len_32598_read_count_581408.17                      |          |
| 2558670332 | DRAFT_01000 | Coordinates    | 15575..16234(+)                                                        |          |
| 2558670332 | DRAFT_01000 | DNA_length     | 660bp                                                                  |          |
| 2558670332 | DRAFT_01000 | Protein_length | 219aa                                                                  |          |
| 2558670332 | DRAFT_01000 | GC             |                                                                        | 0.58     |
| 2558670332 | DRAFT_01000 | Transmembrane  | Yes                                                                    |          |
| 2558670333 | DRAFT_01001 | Locus_type     | CDS                                                                    |          |
| 2558670333 | DRAFT_01001 | Product_name   | hypothetical protein                                                   |          |
| 2558670333 | DRAFT_01001 | Scaffold       | DRAFT_contig_70_99_len_32598_read_count_581408.17                      |          |
| 2558670333 | DRAFT_01001 | Coordinates    | 16590..18500(-)                                                        |          |
| 2558670333 | DRAFT_01001 | DNA_length     | 1911bp                                                                 |          |
| 2558670333 | DRAFT_01001 | Protein_length | 636aa                                                                  |          |
| 2558670333 | DRAFT_01001 | GC             |                                                                        | 0.58     |
| 2558670333 | DRAFT_01001 | Transmembrane  | Yes                                                                    |          |
| 2558670334 | DRAFT_01002 | COG_category   | [M] Cell wall/membrane/envelope biogenesis                             |          |
| 2558670334 | DRAFT_01002 | COG4591        | ABC-type transport system, involved in lipoprotein release, permease c | 1.00E-08 |
| 2558670334 | DRAFT_01002 | pfam02687      | FtsX                                                                   | 7.30E-11 |
| 2558670334 | DRAFT_01002 | pfam12704      | MacB_PCD                                                               | 6.60E-18 |
| 2558670334 | DRAFT_01002 | Locus_type     | CDS                                                                    |          |
| 2558670334 | DRAFT_01002 | Product_name   | ABC-type transport system, involved in lipoprotein release, permease   |          |
| 2558670334 | DRAFT_01002 | Scaffold       | DRAFT_contig_70_99_len_32598_read_count_581408.17                      |          |
| 2558670334 | DRAFT_01002 | Coordinates    | 18558..19682(+)                                                        |          |
| 2558670334 | DRAFT_01002 | DNA_length     | 1125bp                                                                 |          |
| 2558670334 | DRAFT_01002 | Protein_length | 374aa                                                                  |          |
| 2558670334 | DRAFT_01002 | GC             |                                                                        | 0.57     |
| 2558670334 | DRAFT_01002 | Transmembrane  | Yes                                                                    |          |

|            |             |                |                                                                   |          |
|------------|-------------|----------------|-------------------------------------------------------------------|----------|
| 2558670335 | DRAFT_01003 | KEGG_module    | M00258: Putative ABC transport system                             |          |
| 2558670335 | DRAFT_01003 | COG_category   | [V] Defense mechanisms                                            |          |
| 2558670335 | DRAFT_01003 | COG1136        | ABC-type antimicrobial peptide transport system, ATPase component | 3.00E-58 |
| 2558670335 | DRAFT_01003 | pfam00005      | ABC_tran                                                          | 5.70E-29 |
| 2558670335 | DRAFT_01003 | KO:K02003      | putative ABC transport system ATP-binding protein                 | 0.00E+00 |
| 2558670335 | DRAFT_01003 | Locus_type     | CDS                                                               |          |
| 2558670335 | DRAFT_01003 | Product_name   | ABC-type antimicrobial peptide transport system, ATPase component |          |
| 2558670335 | DRAFT_01003 | Scaffold       | DRAFT_contig_70_99_len_32598_read_count_581408.17                 |          |
| 2558670335 | DRAFT_01003 | Coordinates    | 19679..20371(+)                                                   |          |
| 2558670335 | DRAFT_01003 | DNA_length     | 693bp                                                             |          |
| 2558670335 | DRAFT_01003 | Protein_length | 230aa                                                             |          |
| 2558670335 | DRAFT_01003 | GC             |                                                                   | 0.59     |
|            |             |                |                                                                   |          |
| 2558670336 | DRAFT_01004 | COG_category   | [K] Transcription                                                 |          |
| 2558670336 | DRAFT_01004 | COG_category   | [L] Replication, recombination and repair                         |          |
| 2558670336 | DRAFT_01004 | COG1199        | Rad3-related DNA helicases                                        | 2.00E-41 |
| 2558670336 | DRAFT_01004 | pfam13307      | Helicase_C_2                                                      | 4.60E-18 |
| 2558670336 | DRAFT_01004 | pfam06733      | DEAD_2                                                            | 4.40E-08 |
| 2558670336 | DRAFT_01004 | Locus_type     | CDS                                                               |          |
| 2558670336 | DRAFT_01004 | Product_name   | Helicase C-terminal domain/DEAD_2                                 |          |
| 2558670336 | DRAFT_01004 | Scaffold       | DRAFT_contig_70_99_len_32598_read_count_581408.17                 |          |
| 2558670336 | DRAFT_01004 | Coordinates    | 20772..22520(-)                                                   |          |
| 2558670336 | DRAFT_01004 | DNA_length     | 1749bp                                                            |          |
| 2558670336 | DRAFT_01004 | Protein_length | 582aa                                                             |          |
| 2558670336 | DRAFT_01004 | GC             |                                                                   | 0.58     |
|            |             |                |                                                                   |          |
| 2558670337 | DRAFT_01005 | pfam04041      | DUF377                                                            | 2.70E-32 |
| 2558670337 | DRAFT_01005 | Locus_type     | CDS                                                               |          |
| 2558670337 | DRAFT_01005 | Product_name   | Predicted glycosylase                                             |          |
| 2558670337 | DRAFT_01005 | Scaffold       | DRAFT_contig_70_99_len_32598_read_count_581408.17                 |          |
| 2558670337 | DRAFT_01005 | Coordinates    | 22663..24132(-)                                                   |          |
| 2558670337 | DRAFT_01005 | DNA_length     | 1470bp                                                            |          |
| 2558670337 | DRAFT_01005 | Protein_length | 489aa                                                             |          |
| 2558670337 | DRAFT_01005 | GC             |                                                                   | 0.64     |

|            |             |                |                                                   |          |
|------------|-------------|----------------|---------------------------------------------------|----------|
| 2558670338 | DRAFT_01006 | COG_category   | [M] Cell wall/membrane/envelope biogenesis        |          |
| 2558670338 | DRAFT_01006 | COG0438        | Glycosyltransferase                               | 3.00E-23 |
| 2558670338 | DRAFT_01006 | pfam00534      | Glycos_transf_1                                   | 2.20E-18 |
| 2558670338 | DRAFT_01006 | Locus_type     | CDS                                               |          |
| 2558670338 | DRAFT_01006 | Product_name   | Glycosyltransferase                               |          |
| 2558670338 | DRAFT_01006 | Scaffold       | DRAFT_contig_70_99_len_32598_read_count_581408.17 |          |
| 2558670338 | DRAFT_01006 | Coordinates    | 24167..26362(-)                                   |          |
| 2558670338 | DRAFT_01006 | DNA_length     | 2196bp                                            |          |
| 2558670338 | DRAFT_01006 | Protein_length | 731aa                                             |          |
| 2558670338 | DRAFT_01006 | GC             |                                                   | 0.61     |
| 2558670338 | DRAFT_01006 | Fused_gene     | Yes                                               |          |
| 2558670339 | DRAFT_01007 | Locus_type     | CDS                                               |          |
| 2558670339 | DRAFT_01007 | Product_name   | hypothetical protein                              |          |
| 2558670339 | DRAFT_01007 | Scaffold       | DRAFT_contig_70_99_len_32598_read_count_581408.17 |          |
| 2558670339 | DRAFT_01007 | Coordinates    | 26641..27024(+)                                   |          |
| 2558670339 | DRAFT_01007 | DNA_length     | 384bp                                             |          |
| 2558670339 | DRAFT_01007 | Protein_length | 127aa                                             |          |
| 2558670339 | DRAFT_01007 | GC             |                                                   | 0.49     |
| 2558670339 | DRAFT_01007 | Transmembrane  | Yes                                               |          |
| 2558670340 | DRAFT_01008 | COG_category   | [P] Inorganic ion transport and metabolism        |          |
| 2558670340 | DRAFT_01008 | COG2608        | Copper chaperone                                  | 1.00E-03 |
| 2558670340 | DRAFT_01008 | Locus_type     | CDS                                               |          |
| 2558670340 | DRAFT_01008 | Product_name   | Copper chaperone                                  |          |
| 2558670340 | DRAFT_01008 | Scaffold       | DRAFT_contig_70_99_len_32598_read_count_581408.17 |          |
| 2558670340 | DRAFT_01008 | Coordinates    | 27407..27739(-)                                   |          |
| 2558670340 | DRAFT_01008 | DNA_length     | 333bp                                             |          |
| 2558670340 | DRAFT_01008 | Protein_length | 110aa                                             |          |
| 2558670340 | DRAFT_01008 | GC             |                                                   | 0.55     |
| 2558670341 | DRAFT_01009 | pfam01402      | RHH_1                                             | 2.00E-04 |
| 2558670341 | DRAFT_01009 | Locus_type     | CDS                                               |          |

|            |             |                |                                                                  |          |
|------------|-------------|----------------|------------------------------------------------------------------|----------|
| 2558670341 | DRAFT_01009 | Product_name   | Ribbon-helix-helix protein, copG family                          |          |
| 2558670341 | DRAFT_01009 | Scaffold       | DRAFT_contig_70_99_len_32598_read_count_581408.17                |          |
| 2558670341 | DRAFT_01009 | Coordinates    | 27848..28366(-)                                                  |          |
| 2558670341 | DRAFT_01009 | DNA_length     | 519bp                                                            |          |
| 2558670341 | DRAFT_01009 | Protein_length | 172aa                                                            |          |
| 2558670341 | DRAFT_01009 | GC             |                                                                  | 0.56     |
|            |             |                |                                                                  |          |
| 2558670342 | DRAFT_01010 | COG_category   | [O] Posttranslational modification, protein turnover, chaperones |          |
| 2558670342 | DRAFT_01010 | COG0071        | Molecular chaperone (small heat shock protein)                   | 7.00E-20 |
| 2558670342 | DRAFT_01010 | pfam00011      | HSP20                                                            | 9.70E-18 |
| 2558670342 | DRAFT_01010 | KO:K13993      | HSP20 family protein                                             | 6.10E-19 |
| 2558670342 | DRAFT_01010 | Locus_type     | CDS                                                              |          |
| 2558670342 | DRAFT_01010 | Product_name   | Molecular chaperone (small heat shock protein)                   |          |
| 2558670342 | DRAFT_01010 | Scaffold       | DRAFT_contig_70_99_len_32598_read_count_581408.17                |          |
| 2558670342 | DRAFT_01010 | Coordinates    | 28623..29168(+)                                                  |          |
| 2558670342 | DRAFT_01010 | DNA_length     | 546bp                                                            |          |
| 2558670342 | DRAFT_01010 | Protein_length | 181aa                                                            |          |
| 2558670342 | DRAFT_01010 | GC             |                                                                  | 0.53     |
|            |             |                |                                                                  |          |
| 2558670343 | DRAFT_01011 | Locus_type     | CDS                                                              |          |
| 2558670343 | DRAFT_01011 | Product_name   | hypothetical protein                                             |          |
| 2558670343 | DRAFT_01011 | Scaffold       | DRAFT_contig_70_99_len_32598_read_count_581408.17                |          |
| 2558670343 | DRAFT_01011 | Coordinates    | 29258..29386(-)                                                  |          |
| 2558670343 | DRAFT_01011 | DNA_length     | 129bp                                                            |          |
| 2558670343 | DRAFT_01011 | Protein_length | 42aa                                                             |          |
| 2558670343 | DRAFT_01011 | GC             |                                                                  | 0.6      |
|            |             |                |                                                                  |          |
| 2558670344 | DRAFT_01012 | Locus_type     | CDS                                                              |          |
| 2558670344 | DRAFT_01012 | Product_name   | hypothetical protein                                             |          |
| 2558670344 | DRAFT_01012 | Scaffold       | DRAFT_contig_70_99_len_32598_read_count_581408.17                |          |
| 2558670344 | DRAFT_01012 | Coordinates    | 29496..29714(-)                                                  |          |
| 2558670344 | DRAFT_01012 | DNA_length     | 219bp                                                            |          |
| 2558670344 | DRAFT_01012 | Protein_length | 72aa                                                             |          |
| 2558670344 | DRAFT_01012 | GC             |                                                                  | 0.53     |

|            |             |                |                                                   |          |
|------------|-------------|----------------|---------------------------------------------------|----------|
| 2558670344 | DRAFT_01012 | Transmembrane  | Yes                                               |          |
| 2558670345 | DRAFT_01013 | COG_category   | [L] Replication, recombination and repair         |          |
| 2558670345 | DRAFT_01013 | COG3316        | Transposase and inactivated derivatives           | 7.00E-15 |
| 2558670345 | DRAFT_01013 | pfam04434      | SWIM                                              | 9.50E-07 |
| 2558670345 | DRAFT_01013 | pfam13610      | DDE_Tnp_IS240                                     | 1.30E-24 |
| 2558670345 | DRAFT_01013 | Locus_type     | CDS                                               |          |
| 2558670345 | DRAFT_01013 | Product_name   | Transposase and inactivated derivatives           |          |
| 2558670345 | DRAFT_01013 | Scaffold       | DRAFT_contig_70_99_len_32598_read_count_581408.17 |          |
| 2558670345 | DRAFT_01013 | Coordinates    | 29720..30838(-)                                   |          |
| 2558670345 | DRAFT_01013 | DNA_length     | 1119bp                                            |          |
| 2558670345 | DRAFT_01013 | Protein_length | 372aa                                             |          |
| 2558670345 | DRAFT_01013 | GC             |                                                   | 0.53     |
| 2558670346 | DRAFT_01014 | Locus_type     | CDS                                               |          |
| 2558670346 | DRAFT_01014 | Product_name   | hypothetical protein                              |          |
| 2558670346 | DRAFT_01014 | Scaffold       | DRAFT_contig_70_99_len_32598_read_count_581408.17 |          |
| 2558670346 | DRAFT_01014 | Coordinates    | 30979..31176(+)                                   |          |
| 2558670346 | DRAFT_01014 | DNA_length     | 198bp                                             |          |
| 2558670346 | DRAFT_01014 | Protein_length | 65aa                                              |          |
| 2558670346 | DRAFT_01014 | GC             |                                                   | 0.46     |
| 2558670347 | DRAFT_01015 | Locus_type     | CDS                                               |          |
| 2558670347 | DRAFT_01015 | Product_name   | hypothetical protein                              |          |
| 2558670347 | DRAFT_01015 | Scaffold       | DRAFT_contig_70_99_len_32598_read_count_581408.17 |          |
| 2558670347 | DRAFT_01015 | Coordinates    | 31173..31589(+)                                   |          |
| 2558670347 | DRAFT_01015 | DNA_length     | 417bp                                             |          |
| 2558670347 | DRAFT_01015 | Protein_length | 138aa                                             |          |
| 2558670347 | DRAFT_01015 | GC             |                                                   | 0.48     |
| 2558670348 | DRAFT_01016 | Locus_type     | CDS                                               |          |
| 2558670348 | DRAFT_01016 | Product_name   | hypothetical protein                              |          |
| 2558670348 | DRAFT_01016 | Scaffold       | DRAFT_contig_70_99_len_32598_read_count_581408.17 |          |
| 2558670348 | DRAFT_01016 | Coordinates    | 31564..31965(+)                                   |          |

|            |             |                |            |                                                    |          |
|------------|-------------|----------------|------------|----------------------------------------------------|----------|
| 2558670348 | DRAFT_01016 | DNA_length     |            | 402bp                                              |          |
| 2558670348 | DRAFT_01016 | Protein_length |            | 133aa                                              |          |
| 2558670348 | DRAFT_01016 | GC             |            |                                                    | 0.48     |
| 2558670349 | DRAFT_01017 | pfam12874      | zf-met     |                                                    | 1.90E-04 |
| 2558670349 | DRAFT_01017 | pfam00301      | Rubredoxin |                                                    | 9.70E-06 |
| 2558670349 | DRAFT_01017 | pfam13912      | zf-C2H2_6  |                                                    | 5.50E-06 |
| 2558670349 | DRAFT_01017 | Locus_type     |            | CDS                                                |          |
| 2558670349 | DRAFT_01017 | Product_name   |            | Zinc-finger of C2H2 type/C2H2-type zinc finger     |          |
| 2558670349 | DRAFT_01017 | Scaffold       |            | DRAFT_contig_70_99_len_32598_read_count_581408.17  |          |
| 2558670349 | DRAFT_01017 | Coordinates    |            | 31904..32149(+)                                    |          |
| 2558670349 | DRAFT_01017 | DNA_length     |            | 246bp                                              |          |
| 2558670349 | DRAFT_01017 | Protein_length |            | 81aa                                               |          |
| 2558670349 | DRAFT_01017 | GC             |            |                                                    | 0.52     |
| 2558670350 | DRAFT_01018 | Locus_type     |            | CDS                                                |          |
| 2558670350 | DRAFT_01018 | Product_name   |            | hypothetical protein                               |          |
| 2558670350 | DRAFT_01018 | Scaffold       |            | DRAFT_contig_70_99_len_32598_read_count_581408.17  |          |
| 2558670350 | DRAFT_01018 | Coordinates    |            | 32146..32325(+)                                    |          |
| 2558670350 | DRAFT_01018 | DNA_length     |            | 180bp                                              |          |
| 2558670350 | DRAFT_01018 | Protein_length |            | 59aa                                               |          |
| 2558670350 | DRAFT_01018 | GC             |            |                                                    | 0.45     |
| 2558670351 | DRAFT_01019 | Locus_type     |            | CDS                                                |          |
| 2558670351 | DRAFT_01019 | Product_name   |            | hypothetical protein                               |          |
| 2558670351 | DRAFT_01019 | Scaffold       |            | DRAFT_contig_70_99_len_32598_read_count_581408.17  |          |
| 2558670351 | DRAFT_01019 | Coordinates    |            | 32332..32595(+)                                    |          |
| 2558670351 | DRAFT_01019 | DNA_length     |            | 264bp                                              |          |
| 2558670351 | DRAFT_01019 | Protein_length |            | 88aa                                               |          |
| 2558670351 | DRAFT_01019 | GC             |            |                                                    | 0.54     |
| 2558670352 | DRAFT_01020 | Locus_type     |            | CDS                                                |          |
| 2558670352 | DRAFT_01020 | Product_name   |            | hypothetical protein                               |          |
| 2558670352 | DRAFT_01020 | Scaffold       |            | DRAFT_contig_70_107_len_30580_read_count_534093.18 |          |

|            |             |                |         |                                                    |          |
|------------|-------------|----------------|---------|----------------------------------------------------|----------|
| 2558670352 | DRAFT_01020 | Coordinates    |         | 3..173(+)                                          |          |
| 2558670352 | DRAFT_01020 | DNA_length     |         | 171bp                                              |          |
| 2558670352 | DRAFT_01020 | Protein_length |         | 56aa                                               |          |
| 2558670352 | DRAFT_01020 | GC             |         |                                                    | 0.58     |
| 2558670352 | DRAFT_01020 | Transmembrane  |         | Yes                                                |          |
| 2558670353 | DRAFT_01021 | Locus_type     |         | CDS                                                |          |
| 2558670353 | DRAFT_01021 | Product_name   |         | hypothetical protein                               |          |
| 2558670353 | DRAFT_01021 | Scaffold       |         | DRAFT_contig_70_107_len_30580_read_count_534093.18 |          |
| 2558670353 | DRAFT_01021 | Coordinates    |         | 107..385(-)                                        |          |
| 2558670353 | DRAFT_01021 | DNA_length     |         | 279bp                                              |          |
| 2558670353 | DRAFT_01021 | Protein_length |         | 92aa                                               |          |
| 2558670353 | DRAFT_01021 | GC             |         |                                                    | 0.57     |
| 2558670354 | DRAFT_01022 | pfam07758      | DUF1614 |                                                    | 1.20E-07 |
| 2558670354 | DRAFT_01022 | Locus_type     |         | CDS                                                |          |
| 2558670354 | DRAFT_01022 | Product_name   |         | Protein of unknown function (DUF1614)              |          |
| 2558670354 | DRAFT_01022 | Scaffold       |         | DRAFT_contig_70_107_len_30580_read_count_534093.18 |          |
| 2558670354 | DRAFT_01022 | Coordinates    |         | 345..953(-)                                        |          |
| 2558670354 | DRAFT_01022 | DNA_length     |         | 609bp                                              |          |
| 2558670354 | DRAFT_01022 | Protein_length |         | 202aa                                              |          |
| 2558670354 | DRAFT_01022 | GC             |         |                                                    | 0.52     |
| 2558670354 | DRAFT_01022 | Transmembrane  |         | Yes                                                |          |
| 2558670355 | DRAFT_01023 | Locus_type     |         | CDS                                                |          |
| 2558670355 | DRAFT_01023 | Product_name   |         | hypothetical protein                               |          |
| 2558670355 | DRAFT_01023 | Scaffold       |         | DRAFT_contig_70_107_len_30580_read_count_534093.18 |          |
| 2558670355 | DRAFT_01023 | Coordinates    |         | 1122..1763(-)                                      |          |
| 2558670355 | DRAFT_01023 | DNA_length     |         | 642bp                                              |          |
| 2558670355 | DRAFT_01023 | Protein_length |         | 213aa                                              |          |
| 2558670355 | DRAFT_01023 | GC             |         |                                                    | 0.51     |
| 2558670356 | DRAFT_01024 | Locus_type     |         | CDS                                                |          |
| 2558670356 | DRAFT_01024 | Product_name   |         | hypothetical protein                               |          |

|            |             |                |      |                                                    |
|------------|-------------|----------------|------|----------------------------------------------------|
| 2558670356 | DRAFT_01024 | Scaffold       |      | DRAFT_contig_70_107_len_30580_read_count_534093.18 |
| 2558670356 | DRAFT_01024 | Coordinates    |      | 1898..2809(-)                                      |
| 2558670356 | DRAFT_01024 | DNA_length     |      | 912bp                                              |
| 2558670356 | DRAFT_01024 | Protein_length |      | 303aa                                              |
| 2558670356 | DRAFT_01024 | GC             |      | 0.5                                                |
| 2558670357 | DRAFT_01025 | Locus_type     |      | CDS                                                |
| 2558670357 | DRAFT_01025 | Product_name   |      | hypothetical protein                               |
| 2558670357 | DRAFT_01025 | Scaffold       |      | DRAFT_contig_70_107_len_30580_read_count_534093.18 |
| 2558670357 | DRAFT_01025 | Coordinates    |      | 3209..5209(+)                                      |
| 2558670357 | DRAFT_01025 | DNA_length     |      | 2001bp                                             |
| 2558670357 | DRAFT_01025 | Protein_length |      | 666aa                                              |
| 2558670357 | DRAFT_01025 | GC             |      | 0.51                                               |
| 2558670358 | DRAFT_01026 | pfam08123      | DOT1 | 2.30E-05                                           |
| 2558670358 | DRAFT_01026 | Locus_type     |      | CDS                                                |
| 2558670358 | DRAFT_01026 | Product_name   |      | Histone methylation protein DOT1                   |
| 2558670358 | DRAFT_01026 | Scaffold       |      | DRAFT_contig_70_107_len_30580_read_count_534093.18 |
| 2558670358 | DRAFT_01026 | Coordinates    |      | 5253..5501(-)                                      |
| 2558670358 | DRAFT_01026 | DNA_length     |      | 249bp                                              |
| 2558670358 | DRAFT_01026 | Protein_length |      | 82aa                                               |
| 2558670358 | DRAFT_01026 | GC             |      | 0.58                                               |
| 2558670359 | DRAFT_01027 | Locus_type     |      | CDS                                                |
| 2558670359 | DRAFT_01027 | Product_name   |      | hypothetical protein                               |
| 2558670359 | DRAFT_01027 | Scaffold       |      | DRAFT_contig_70_107_len_30580_read_count_534093.18 |
| 2558670359 | DRAFT_01027 | Coordinates    |      | 5547..5675(-)                                      |
| 2558670359 | DRAFT_01027 | DNA_length     |      | 129bp                                              |
| 2558670359 | DRAFT_01027 | Protein_length |      | 42aa                                               |
| 2558670359 | DRAFT_01027 | GC             |      | 0.6                                                |
| 2558670360 | DRAFT_01028 | Locus_type     |      | CDS                                                |
| 2558670360 | DRAFT_01028 | Product_name   |      | hypothetical protein                               |
| 2558670360 | DRAFT_01028 | Scaffold       |      | DRAFT_contig_70_107_len_30580_read_count_534093.18 |



|            |             |                |      |                                                      |          |
|------------|-------------|----------------|------|------------------------------------------------------|----------|
| 2558670360 | DRAFT_01028 | Coordinates    |      | 5860..6390(-)                                        |          |
| 2558670360 | DRAFT_01028 | DNA_length     |      | 531bp                                                |          |
| 2558670360 | DRAFT_01028 | Protein_length |      | 176aa                                                |          |
| 2558670360 | DRAFT_01028 | GC             |      |                                                      | 0.53     |
| 2558670360 | DRAFT_01028 | Transmembrane  |      | Yes                                                  |          |
|            |             |                |      |                                                      |          |
| 2558670361 | DRAFT_01029 | Locus_type     |      | CDS                                                  |          |
| 2558670361 | DRAFT_01029 | Product_name   |      | hypothetical protein                                 |          |
| 2558670361 | DRAFT_01029 | Scaffold       |      | DRAFT_contig_70_107_len_30580_read_count_534093.18   |          |
| 2558670361 | DRAFT_01029 | Coordinates    |      | 6510..7445(+)                                        |          |
| 2558670361 | DRAFT_01029 | DNA_length     |      | 936bp                                                |          |
| 2558670361 | DRAFT_01029 | Protein_length |      | 311aa                                                |          |
| 2558670361 | DRAFT_01029 | GC             |      |                                                      | 0.51     |
|            |             |                |      |                                                      |          |
| 2558670362 | DRAFT_01030 | Locus_type     |      | CDS                                                  |          |
| 2558670362 | DRAFT_01030 | Product_name   |      | hypothetical protein                                 |          |
| 2558670362 | DRAFT_01030 | Scaffold       |      | DRAFT_contig_70_107_len_30580_read_count_534093.18   |          |
| 2558670362 | DRAFT_01030 | Coordinates    |      | 7549..8766(+)                                        |          |
| 2558670362 | DRAFT_01030 | DNA_length     |      | 1218bp                                               |          |
| 2558670362 | DRAFT_01030 | Protein_length |      | 405aa                                                |          |
| 2558670362 | DRAFT_01030 | GC             |      |                                                      | 0.54     |
| 2558670362 | DRAFT_01030 | Transmembrane  |      | Yes                                                  |          |
|            |             |                |      |                                                      |          |
| 2558670363 | DRAFT_01031 | Locus_type     |      | CDS                                                  |          |
| 2558670363 | DRAFT_01031 | Product_name   |      | hypothetical protein                                 |          |
| 2558670363 | DRAFT_01031 | Scaffold       |      | DRAFT_contig_70_107_len_30580_read_count_534093.18   |          |
| 2558670363 | DRAFT_01031 | Coordinates    |      | 8867..9028(+)                                        |          |
| 2558670363 | DRAFT_01031 | DNA_length     |      | 162bp                                                |          |
| 2558670363 | DRAFT_01031 | Protein_length |      | 53aa                                                 |          |
| 2558670363 | DRAFT_01031 | GC             |      |                                                      | 0.57     |
|            |             |                |      |                                                      |          |
| 2558670364 | DRAFT_01032 | pfam06094      | AIG2 |                                                      | 1.90E-12 |
| 2558670364 | DRAFT_01032 | Locus_type     |      | CDS                                                  |          |
| 2558670364 | DRAFT_01032 | Product_name   |      | Uncharacterized protein involved in cation transport |          |

|            |             |                |                                      |                                                    |          |
|------------|-------------|----------------|--------------------------------------|----------------------------------------------------|----------|
| 2558670364 | DRAFT_01032 | Scaffold       |                                      | DRAFT_contig_70_107_len_30580_read_count_534093.18 |          |
| 2558670364 | DRAFT_01032 | Coordinates    |                                      | 9025..10074(+)                                     |          |
| 2558670364 | DRAFT_01032 | DNA_length     |                                      | 1050bp                                             |          |
| 2558670364 | DRAFT_01032 | Protein_length |                                      | 349aa                                              |          |
| 2558670364 | DRAFT_01032 | GC             |                                      |                                                    | 0.56     |
| 2558670365 | DRAFT_01033 | COG_category   | [S] Function unknown                 |                                                    |          |
| 2558670365 | DRAFT_01033 | COG3832        | Uncharacterized conserved protein    |                                                    | 4.00E-11 |
| 2558670365 | DRAFT_01033 | pfam08327      | AHSA1                                |                                                    | 7.60E-17 |
| 2558670365 | DRAFT_01033 | Locus_type     |                                      | CDS                                                |          |
| 2558670365 | DRAFT_01033 | Product_name   |                                      | Uncharacterized conserved protein                  |          |
| 2558670365 | DRAFT_01033 | Scaffold       |                                      | DRAFT_contig_70_107_len_30580_read_count_534093.18 |          |
| 2558670365 | DRAFT_01033 | Coordinates    |                                      | 10254..10769(-)                                    |          |
| 2558670365 | DRAFT_01033 | DNA_length     |                                      | 516bp                                              |          |
| 2558670365 | DRAFT_01033 | Protein_length |                                      | 171aa                                              |          |
| 2558670365 | DRAFT_01033 | GC             |                                      |                                                    | 0.55     |
| 2558670366 | DRAFT_01034 | COG_category   | [R] General function prediction only |                                                    |          |
| 2558670366 | DRAFT_01034 | COG0730        | Predicted permeases                  |                                                    | 2.00E-14 |
| 2558670366 | DRAFT_01034 | pfam01925      | TauE                                 |                                                    | 1.40E-39 |
| 2558670366 | DRAFT_01034 | Locus_type     |                                      | CDS                                                |          |
| 2558670366 | DRAFT_01034 | Product_name   |                                      | Predicted permeases                                |          |
| 2558670366 | DRAFT_01034 | Scaffold       |                                      | DRAFT_contig_70_107_len_30580_read_count_534093.18 |          |
| 2558670366 | DRAFT_01034 | Coordinates    |                                      | 10994..11821(+)                                    |          |
| 2558670366 | DRAFT_01034 | DNA_length     |                                      | 828bp                                              |          |
| 2558670366 | DRAFT_01034 | Protein_length |                                      | 275aa                                              |          |
| 2558670366 | DRAFT_01034 | GC             |                                      |                                                    | 0.57     |
| 2558670366 | DRAFT_01034 | Transmembrane  |                                      | Yes                                                |          |
| 2558670367 | DRAFT_01035 | COG_category   | [S] Function unknown                 |                                                    |          |
| 2558670367 | DRAFT_01035 | COG4272        | Predicted membrane protein           |                                                    | 3.00E-08 |
| 2558670367 | DRAFT_01035 | pfam07843      | DUF1634                              |                                                    | 1.20E-16 |
| 2558670367 | DRAFT_01035 | Locus_type     |                                      | CDS                                                |          |
| 2558670367 | DRAFT_01035 | Product_name   |                                      | Predicted membrane protein                         |          |

|            |             |                |                                                       |                                                    |           |
|------------|-------------|----------------|-------------------------------------------------------|----------------------------------------------------|-----------|
| 2558670367 | DRAFT_01035 | Scaffold       |                                                       | DRAFT_contig_70_107_len_30580_read_count_534093.18 |           |
| 2558670367 | DRAFT_01035 | Coordinates    |                                                       | 11818..12201(+)                                    |           |
| 2558670367 | DRAFT_01035 | DNA_length     |                                                       | 384bp                                              |           |
| 2558670367 | DRAFT_01035 | Protein_length |                                                       | 127aa                                              |           |
| 2558670367 | DRAFT_01035 | GC             |                                                       |                                                    | 0.55      |
| 2558670367 | DRAFT_01035 | Transmembrane  |                                                       | Yes                                                |           |
| 2558670368 | DRAFT_01036 | COG_category   | [S] Function unknown                                  |                                                    |           |
| 2558670368 | DRAFT_01036 | COG3885        | Uncharacterized conserved protein                     |                                                    | 2.00E-54  |
| 2558670368 | DRAFT_01036 | pfam02900      | LigB                                                  |                                                    | 1.30E-19  |
| 2558670368 | DRAFT_01036 | Locus_type     |                                                       | CDS                                                |           |
| 2558670368 | DRAFT_01036 | Product_name   |                                                       | Uncharacterized conserved protein                  |           |
| 2558670368 | DRAFT_01036 | Scaffold       |                                                       | DRAFT_contig_70_107_len_30580_read_count_534093.18 |           |
| 2558670368 | DRAFT_01036 | Coordinates    |                                                       | 12450..13289(-)                                    |           |
| 2558670368 | DRAFT_01036 | DNA_length     |                                                       | 840bp                                              |           |
| 2558670368 | DRAFT_01036 | Protein_length |                                                       | 279aa                                              |           |
| 2558670368 | DRAFT_01036 | GC             |                                                       |                                                    | 0.59      |
| 2558670369 | DRAFT_01037 | COG_category   | [R] General function prediction only                  |                                                    |           |
| 2558670369 | DRAFT_01037 | COG0491        | Zn-dependent hydrolases, including glyoxylases        |                                                    | 3.00E-14  |
| 2558670369 | DRAFT_01037 | pfam00753      | Lactamase_B                                           |                                                    | 3.60E-20  |
| 2558670369 | DRAFT_01037 | Locus_type     |                                                       | CDS                                                |           |
| 2558670369 | DRAFT_01037 | Product_name   |                                                       | Zn-dependent hydrolases, including glyoxylases     |           |
| 2558670369 | DRAFT_01037 | Scaffold       |                                                       | DRAFT_contig_70_107_len_30580_read_count_534093.18 |           |
| 2558670369 | DRAFT_01037 | Coordinates    |                                                       | 13315..14217(-)                                    |           |
| 2558670369 | DRAFT_01037 | DNA_length     |                                                       | 903bp                                              |           |
| 2558670369 | DRAFT_01037 | Protein_length |                                                       | 300aa                                              |           |
| 2558670369 | DRAFT_01037 | GC             |                                                       |                                                    | 0.59      |
| 2558670370 | DRAFT_01038 | Metacyc        | PWY-6842: glutathione-mediated detoxification II      |                                                    |           |
| 2558670370 | DRAFT_01038 | COG_category   | [R] General function prediction only                  |                                                    |           |
| 2558670370 | DRAFT_01038 | COG1473        | Metal-dependent amidase/aminoacylase/carboxypeptidase |                                                    | 5.00E-118 |
| 2558670370 | DRAFT_01038 | pfam07687      | M20_dimer                                             |                                                    | 2.30E-14  |
| 2558670370 | DRAFT_01038 | pfam01546      | Peptidase_M20                                         |                                                    | 6.40E-32  |

|            |             |                |                                                                            |           |
|------------|-------------|----------------|----------------------------------------------------------------------------|-----------|
| 2558670370 | DRAFT_01038 | EC:3.4.17.-    | Hydrolases. Acting on peptide bonds (peptide hydrolases). Metalloprotease. |           |
| 2558670370 | DRAFT_01038 | TIGR01891      | amidohydrolase                                                             | 1.00E-123 |
| 2558670370 | DRAFT_01038 | KO:K13048      | carboxypeptidase Ss1 [EC:3.4.17.-]                                         | 0.00E+00  |
| 2558670370 | DRAFT_01038 | Locus_type     | CDS                                                                        |           |
| 2558670370 | DRAFT_01038 | Product_name   | carboxypeptidase Ss1. Metallo peptidase. MEROPS family M20D                |           |
| 2558670370 | DRAFT_01038 | Scaffold       | DRAFT_contig_70_107_len_30580_read_count_534093.18                         |           |
| 2558670370 | DRAFT_01038 | Coordinates    | 14227..15417(-)                                                            |           |
| 2558670370 | DRAFT_01038 | DNA_length     | 1191bp                                                                     |           |
| 2558670370 | DRAFT_01038 | Protein_length | 396aa                                                                      |           |
| 2558670370 | DRAFT_01038 | GC             |                                                                            | 0.57      |
| 2558670371 | DRAFT_01039 | COG_category   | [S] Function unknown                                                       |           |
| 2558670371 | DRAFT_01039 | COG2410        | Uncharacterized conserved protein                                          | 2.00E-17  |
| 2558670371 | DRAFT_01039 | pfam04250      | DUF429                                                                     | 1.10E-27  |
| 2558670371 | DRAFT_01039 | KO:K09147      | hypothetical protein                                                       | 2.00E-31  |
| 2558670371 | DRAFT_01039 | Locus_type     | CDS                                                                        |           |
| 2558670371 | DRAFT_01039 | Product_name   | Uncharacterized conserved protein                                          |           |
| 2558670371 | DRAFT_01039 | Scaffold       | DRAFT_contig_70_107_len_30580_read_count_534093.18                         |           |
| 2558670371 | DRAFT_01039 | Coordinates    | 15473..16081(+)                                                            |           |
| 2558670371 | DRAFT_01039 | DNA_length     | 609bp                                                                      |           |
| 2558670371 | DRAFT_01039 | Protein_length | 202aa                                                                      |           |
| 2558670371 | DRAFT_01039 | GC             |                                                                            | 0.58      |
| 2558670372 | DRAFT_01040 | Locus_type     | tRNA                                                                       |           |
| 2558670372 | DRAFT_01040 | Product_name   | tRNA_Leu_TAA                                                               |           |
| 2558670372 | DRAFT_01040 | Scaffold       | DRAFT_contig_70_107_len_30580_read_count_534093.18                         |           |
| 2558670372 | DRAFT_01040 | Coordinates    | 16337..16446(-)                                                            |           |
| 2558670372 | DRAFT_01040 | DNA_length     | 87bp                                                                       |           |
| 2558670372 | DRAFT_01040 | GC             |                                                                            | 0.63      |
| 2558670373 | DRAFT_01041 | COG_category   | [L] Replication, recombination and repair                                  |           |
| 2558670373 | DRAFT_01041 | COG1796        | DNA polymerase IV (family X)                                               | 4.00E-65  |
| 2558670373 | DRAFT_01041 | pfam02811      | PHP                                                                        | 1.00E-09  |
| 2558670373 | DRAFT_01041 | pfam14716      | HHH_8                                                                      | 1.20E-18  |

|            |             |                |                                                                  |          |
|------------|-------------|----------------|------------------------------------------------------------------|----------|
| 2558670373 | DRAFT_01041 | pfam14791      | DNA_pol_B_thumb                                                  | 2.50E-24 |
| 2558670373 | DRAFT_01041 | KO:K02347      | DNA polymerase (family X)                                        | 0.00E+00 |
| 2558670373 | DRAFT_01041 | Locus_type     | CDS                                                              |          |
| 2558670373 | DRAFT_01041 | Product_name   | DNA polymerase IV (family X)                                     |          |
| 2558670373 | DRAFT_01041 | Scaffold       | DRAFT_contig_70_107_len_30580_read_count_534093.18               |          |
| 2558670373 | DRAFT_01041 | Coordinates    | 16491..18179(-)                                                  |          |
| 2558670373 | DRAFT_01041 | DNA_length     | 1689bp                                                           |          |
| 2558670373 | DRAFT_01041 | Protein_length | 562aa                                                            |          |
| 2558670373 | DRAFT_01041 | GC             |                                                                  | 0.58     |
| 2558670374 | DRAFT_01042 | COG_category   | [E] Amino acid transport and metabolism                          |          |
| 2558670374 | DRAFT_01042 | COG0006        | Xaa-Pro aminopeptidase                                           | 1.00E-62 |
| 2558670374 | DRAFT_01042 | pfam01321      | Creatinase_N                                                     | 1.40E-15 |
| 2558670374 | DRAFT_01042 | pfam00557      | Peptidase_M24                                                    | 4.20E-47 |
| 2558670374 | DRAFT_01042 | EC:3.4.13.9    | Xaa-Pro dipeptidase.                                             |          |
| 2558670374 | DRAFT_01042 | KO:K01271      | Xaa-Pro dipeptidase [EC:3.4.13.9]                                | 0.00E+00 |
| 2558670374 | DRAFT_01042 | Locus_type     | CDS                                                              |          |
| 2558670374 | DRAFT_01042 | Product_name   | Xaa-Pro aminopeptidase                                           |          |
| 2558670374 | DRAFT_01042 | Scaffold       | DRAFT_contig_70_107_len_30580_read_count_534093.18               |          |
| 2558670374 | DRAFT_01042 | Coordinates    | 18255..19355(-)                                                  |          |
| 2558670374 | DRAFT_01042 | DNA_length     | 1101bp                                                           |          |
| 2558670374 | DRAFT_01042 | Protein_length | 366aa                                                            |          |
| 2558670374 | DRAFT_01042 | GC             |                                                                  | 0.59     |
| 2558670375 | DRAFT_01043 | Metacyc        | PWY-5737: (5 <i>R</i> )-carbapenem biosynthesis                  |          |
| 2558670375 | DRAFT_01043 | Metacyc        | PROUT-PWY: proline degradation                                   |          |
| 2558670375 | DRAFT_01043 | Metacyc        | PWY-6922: <i>L</i> -N <sup>Δ</sup> -acetylornithine biosynthesis |          |
| 2558670375 | DRAFT_01043 | Metacyc        | CITRULBIO-PWY: citrulline biosynthesis                           |          |
| 2558670375 | DRAFT_01043 | IMG_pathway    | 181: L-proline oxidation to L-glutamate                          |          |
| 2558670375 | DRAFT_01043 | COG_category   | [E] Amino acid transport and metabolism                          |          |
| 2558670375 | DRAFT_01043 | COG0506        | Proline dehydrogenase                                            | 6.00E-28 |
| 2558670375 | DRAFT_01043 | pfam01619      | Pro_dh                                                           | 1.70E-37 |
| 2558670375 | DRAFT_01043 | EC:1.5.99.8    | Proline dehydrogenase.                                           |          |
| 2558670375 | DRAFT_01043 | KO:K00318      | proline dehydrogenase [EC:1.5.99.8]                              | 0.00E+00 |

|            |             |                |                                                    |           |
|------------|-------------|----------------|----------------------------------------------------|-----------|
| 2558670375 | DRAFT_01043 | ITERM:00470    | L-proline dehydrogenase (EC 1.5.99.8)              |           |
| 2558670375 | DRAFT_01043 | Locus_type     | CDS                                                |           |
| 2558670375 | DRAFT_01043 | Product_name   | L-proline dehydrogenase (EC 1.5.99.8)              |           |
| 2558670375 | DRAFT_01043 | Scaffold       | DRAFT_contig_70_107_len_30580_read_count_534093.18 |           |
| 2558670375 | DRAFT_01043 | Coordinates    | 19370..20257(+)                                    |           |
| 2558670375 | DRAFT_01043 | DNA_length     | 888bp                                              |           |
| 2558670375 | DRAFT_01043 | Protein_length | 295aa                                              |           |
| 2558670375 | DRAFT_01043 | GC             |                                                    | 0.59      |
|            |             |                |                                                    |           |
| 2558670376 | DRAFT_01044 | Locus_type     | CDS                                                |           |
| 2558670376 | DRAFT_01044 | Product_name   | hypothetical protein                               |           |
| 2558670376 | DRAFT_01044 | Scaffold       | DRAFT_contig_70_107_len_30580_read_count_534093.18 |           |
| 2558670376 | DRAFT_01044 | Coordinates    | 20369..20545(+)                                    |           |
| 2558670376 | DRAFT_01044 | DNA_length     | 177bp                                              |           |
| 2558670376 | DRAFT_01044 | Protein_length | 58aa                                               |           |
| 2558670376 | DRAFT_01044 | GC             |                                                    | 0.54      |
|            |             |                |                                                    |           |
| 2558670377 | DRAFT_01045 | pfam12840      | HTH_20                                             | 9.70E-08  |
| 2558670377 | DRAFT_01045 | KO:K07721      | ArsR family transcriptional regulator              | 3.90E-12  |
| 2558670377 | DRAFT_01045 | Locus_type     | CDS                                                |           |
| 2558670377 | DRAFT_01045 | Product_name   | Predicted transcriptional regulators               |           |
| 2558670377 | DRAFT_01045 | Scaffold       | DRAFT_contig_70_107_len_30580_read_count_534093.18 |           |
| 2558670377 | DRAFT_01045 | Coordinates    | 20570..21232(-)                                    |           |
| 2558670377 | DRAFT_01045 | DNA_length     | 663bp                                              |           |
| 2558670377 | DRAFT_01045 | Protein_length | 220aa                                              |           |
| 2558670377 | DRAFT_01045 | GC             |                                                    | 0.57      |
|            |             |                |                                                    |           |
| 2558670378 | DRAFT_01046 | Metacyc        | PWY-4041: &gamma;-glutamyl cycle                   |           |
| 2558670378 | DRAFT_01046 | Metacyc        | PWY-5826: hypoglycin biosynthesis                  |           |
| 2558670378 | DRAFT_01046 | Metacyc        | PWY66-375: leukotriene biosynthesis                |           |
| 2558670378 | DRAFT_01046 | COG_category   | [E] Amino acid transport and metabolism            |           |
| 2558670378 | DRAFT_01046 | COG0405        | Gamma-glutamyltransferase                          | 3.00E-115 |
| 2558670378 | DRAFT_01046 | pfam01019      | G_glu_transpept                                    | 6.80E-108 |
| 2558670378 | DRAFT_01046 | EC:2.3.2.2     | Gamma-glutamyltransferase.                         |           |

|            |             |                |                                                    |          |
|------------|-------------|----------------|----------------------------------------------------|----------|
| 2558670378 | DRAFT_01046 | TIGR00066      | gamma-glutamyltranspeptidase                       | 6.60E-91 |
| 2558670378 | DRAFT_01046 | KO:K00681      | gamma-glutamyltranspeptidase [EC:2.3.2.2]          | 0.00E+00 |
| 2558670378 | DRAFT_01046 | Locus_type     | CDS                                                |          |
| 2558670378 | DRAFT_01046 | Product_name   | Gamma-glutamyltransferase                          |          |
| 2558670378 | DRAFT_01046 | Scaffold       | DRAFT_contig_70_107_len_30580_read_count_534093.18 |          |
| 2558670378 | DRAFT_01046 | Coordinates    | 21300..22823(+)                                    |          |
| 2558670378 | DRAFT_01046 | DNA_length     | 1524bp                                             |          |
| 2558670378 | DRAFT_01046 | Protein_length | 507aa                                              |          |
| 2558670378 | DRAFT_01046 | GC             |                                                    | 0.6      |
| 2558670379 | DRAFT_01047 | Locus_type     | tRNA                                               |          |
| 2558670379 | DRAFT_01047 | Product_name   | tRNA_Arg_CCT                                       |          |
| 2558670379 | DRAFT_01047 | Scaffold       | DRAFT_contig_70_107_len_30580_read_count_534093.18 |          |
| 2558670379 | DRAFT_01047 | Coordinates    | 22855..22960(-)                                    |          |
| 2558670379 | DRAFT_01047 | DNA_length     | 93bp                                               |          |
| 2558670379 | DRAFT_01047 | GC             |                                                    | 0.65     |
| 2558670380 | DRAFT_01048 | Locus_type     | CDS                                                |          |
| 2558670380 | DRAFT_01048 | Product_name   | Ala-tRNA(Pro) hydrolase (EC 3.1.1.-)               |          |
| 2558670380 | DRAFT_01048 | Scaffold       | DRAFT_contig_70_107_len_30580_read_count_534093.18 |          |
| 2558670380 | DRAFT_01048 | Coordinates    | 23004..23456(-)                                    |          |
| 2558670380 | DRAFT_01048 | DNA_length     | 453bp                                              |          |
| 2558670380 | DRAFT_01048 | Protein_length | 150aa                                              |          |
| 2558670380 | DRAFT_01048 | GC             |                                                    | 0.57     |
| 2558670381 | DRAFT_01049 | COG_category   | [C] Energy production and conversion               |          |
| 2558670381 | DRAFT_01049 | COG0644        | Dehydrogenases (flavoproteins)                     | 1.00E-18 |
| 2558670381 | DRAFT_01049 | Locus_type     | CDS                                                |          |
| 2558670381 | DRAFT_01049 | Product_name   | hypothetical protein                               |          |
| 2558670381 | DRAFT_01049 | Scaffold       | DRAFT_contig_70_107_len_30580_read_count_534093.18 |          |
| 2558670381 | DRAFT_01049 | Coordinates    | 23457..24467(-)                                    |          |
| 2558670381 | DRAFT_01049 | DNA_length     | 1011bp                                             |          |
| 2558670381 | DRAFT_01049 | Protein_length | 336aa                                              |          |
| 2558670381 | DRAFT_01049 | GC             |                                                    | 0.57     |

|            |             |                |                                                                   |          |
|------------|-------------|----------------|-------------------------------------------------------------------|----------|
| 2558670382 | DRAFT_01050 | KEGG_module    | M00144: NADH:quinone oxidoreductase, prokaryotes                  |          |
| 2558670382 | DRAFT_01050 | Metacyc        | PWY-5083: NAD/NADH phosphorylation and dephosphorylation          |          |
| 2558670382 | DRAFT_01050 | Metacyc        | PWY0-1334: NADH to cytochrome <i>bd</i> oxidase electron transfer |          |
| 2558670382 | DRAFT_01050 | Metacyc        | PWY-3781: aerobic respiration (cytochrome c)                      |          |
| 2558670382 | DRAFT_01050 | Metacyc        | PWY-4302: aerobic respiration (alternative oxidase pathway)       |          |
| 2558670382 | DRAFT_01050 | Metacyc        | PWY-6692: Fe(II) oxidation                                        |          |
| 2558670382 | DRAFT_01050 | Metacyc        | PWY0-1335: NADH to cytochrome <i>bo</i> oxidase electron transfer |          |
| 2558670382 | DRAFT_01050 | COG_category   | [C] Energy production and conversion                              |          |
| 2558670382 | DRAFT_01050 | COG0838        | NADH:ubiquinone oxidoreductase subunit 3 (chain A)                | 1.00E-14 |
| 2558670382 | DRAFT_01050 | pfam00507      | Oxidored_q4                                                       | 2.60E-15 |
| 2558670382 | DRAFT_01050 | EC:1.6.5.3     | NADH:ubiquinone reductase (H(+)-translocating).                   |          |
| 2558670382 | DRAFT_01050 | KO:K00330      | NADH-quinone oxidoreductase subunit A [EC:1.6.5.3]                | 8.60E-25 |
| 2558670382 | DRAFT_01050 | Locus_type     | CDS                                                               |          |
| 2558670382 | DRAFT_01050 | Product_name   | NADH:ubiquinone oxidoreductase subunit 3 (chain A)                |          |
| 2558670382 | DRAFT_01050 | Scaffold       | DRAFT_contig_70_107_len_30580_read_count_534093.18                |          |
| 2558670382 | DRAFT_01050 | Coordinates    | 24694..25065(+)                                                   |          |
| 2558670382 | DRAFT_01050 | DNA_length     | 372bp                                                             |          |
| 2558670382 | DRAFT_01050 | Protein_length | 123aa                                                             |          |
| 2558670382 | DRAFT_01050 | GC             |                                                                   | 0.59     |
| 2558670382 | DRAFT_01050 | Transmembrane  | Yes                                                               |          |
| 2558670383 | DRAFT_01051 | KEGG_module    | M00144: NADH:quinone oxidoreductase, prokaryotes                  |          |
| 2558670383 | DRAFT_01051 | Metacyc        | PWY-3781: aerobic respiration (cytochrome c)                      |          |
| 2558670383 | DRAFT_01051 | Metacyc        | PWY-5083: NAD/NADH phosphorylation and dephosphorylation          |          |
| 2558670383 | DRAFT_01051 | Metacyc        | PWY0-1334: NADH to cytochrome <i>bd</i> oxidase electron transfer |          |
| 2558670383 | DRAFT_01051 | Metacyc        | PWY-4302: aerobic respiration (alternative oxidase pathway)       |          |
| 2558670383 | DRAFT_01051 | Metacyc        | PWY-6692: Fe(II) oxidation                                        |          |
| 2558670383 | DRAFT_01051 | Metacyc        | PWY0-1335: NADH to cytochrome <i>bo</i> oxidase electron transfer |          |
| 2558670383 | DRAFT_01051 | pfam01058      | Oxidored_q6                                                       | 1.20E-21 |
| 2558670383 | DRAFT_01051 | EC:1.6.5.3     | NADH:ubiquinone reductase (H(+)-translocating).                   |          |
| 2558670383 | DRAFT_01051 | TIGR01957      | NADH-quinone oxidoreductase, B subunit                            | 6.70E-63 |
| 2558670383 | DRAFT_01051 | KO:K00331      | NADH-quinone oxidoreductase subunit B [EC:1.6.5.3]                | 0.00E+00 |
| 2558670383 | DRAFT_01051 | Locus_type     | CDS                                                               |          |



|            |             |                |                                                                   |          |
|------------|-------------|----------------|-------------------------------------------------------------------|----------|
| 2558670383 | DRAFT_01051 | Product_name   | NADH dehydrogenase subunit B (EC 1.6.5.3)                         |          |
| 2558670383 | DRAFT_01051 | Scaffold       | DRAFT_contig_70_107_len_30580_read_count_534093.18                |          |
| 2558670383 | DRAFT_01051 | Coordinates    | 25059..25580(+)                                                   |          |
| 2558670383 | DRAFT_01051 | DNA_length     | 522bp                                                             |          |
| 2558670383 | DRAFT_01051 | Protein_length | 173aa                                                             |          |
| 2558670383 | DRAFT_01051 | GC             |                                                                   | 0.59     |
| 2558670384 | DRAFT_01052 | KEGG_module    | M00144: NADH:quinone oxidoreductase, prokaryotes                  |          |
| 2558670384 | DRAFT_01052 | Metacyc        | PWY-6692: Fe(II) oxidation                                        |          |
| 2558670384 | DRAFT_01052 | Metacyc        | PWY0-1334: NADH to cytochrome <i>bd</i> oxidase electron transfer |          |
| 2558670384 | DRAFT_01052 | Metacyc        | PWY-4302: aerobic respiration (alternative oxidase pathway)       |          |
| 2558670384 | DRAFT_01052 | Metacyc        | PWY-3781: aerobic respiration (cytochrome c)                      |          |
| 2558670384 | DRAFT_01052 | Metacyc        | PWY-5083: NAD/NADH phosphorylation and dephosphorylation          |          |
| 2558670384 | DRAFT_01052 | Metacyc        | PWY0-1335: NADH to cytochrome <i>bo</i> oxidase electron transfer |          |
| 2558670384 | DRAFT_01052 | COG_category   | [C] Energy production and conversion                              |          |
| 2558670384 | DRAFT_01052 | COG0852        | NADH:ubiquinone oxidoreductase 27 kD subunit                      | 2.00E-20 |
| 2558670384 | DRAFT_01052 | pfam00329      | Complex1_30kDa                                                    | 6.90E-26 |
| 2558670384 | DRAFT_01052 | EC:1.6.5.3     | NADH:ubiquinone reductase (H(+)-translocating).                   |          |
| 2558670384 | DRAFT_01052 | KO:K00332      | NADH-quinone oxidoreductase subunit C [EC:1.6.5.3]                | 3.10E-34 |
| 2558670384 | DRAFT_01052 | Locus_type     | CDS                                                               |          |
| 2558670384 | DRAFT_01052 | Product_name   | NADH:ubiquinone oxidoreductase 27 kD subunit                      |          |
| 2558670384 | DRAFT_01052 | Scaffold       | DRAFT_contig_70_107_len_30580_read_count_534093.18                |          |
| 2558670384 | DRAFT_01052 | Coordinates    | 25588..26148(+)                                                   |          |
| 2558670384 | DRAFT_01052 | DNA_length     | 561bp                                                             |          |
| 2558670384 | DRAFT_01052 | Protein_length | 186aa                                                             |          |
| 2558670384 | DRAFT_01052 | GC             |                                                                   | 0.58     |
| 2558670385 | DRAFT_01053 | KEGG_module    | M00144: NADH:quinone oxidoreductase, prokaryotes                  |          |
| 2558670385 | DRAFT_01053 | Metacyc        | PWY0-1335: NADH to cytochrome <i>bo</i> oxidase electron transfer |          |
| 2558670385 | DRAFT_01053 | Metacyc        | PWY0-1334: NADH to cytochrome <i>bd</i> oxidase electron transfer |          |
| 2558670385 | DRAFT_01053 | Metacyc        | PWY-3781: aerobic respiration (cytochrome c)                      |          |
| 2558670385 | DRAFT_01053 | Metacyc        | PWY-5083: NAD/NADH phosphorylation and dephosphorylation          |          |
| 2558670385 | DRAFT_01053 | Metacyc        | PWY-4302: aerobic respiration (alternative oxidase pathway)       |          |
| 2558670385 | DRAFT_01053 | Metacyc        | PWY-6692: Fe(II) oxidation                                        |          |

|            |             |                |                                                    |           |
|------------|-------------|----------------|----------------------------------------------------|-----------|
| 2558670385 | DRAFT_01053 | COG_category   | [C] Energy production and conversion               |           |
| 2558670385 | DRAFT_01053 | COG0649        | NADH:ubiquinone oxidoreductase 49 kD subunit 7     | 1.00E-121 |
| 2558670385 | DRAFT_01053 | pfam00346      | Complex1_49kDa                                     | 9.90E-15  |
| 2558670385 | DRAFT_01053 | pfam00346      | Complex1_49kDa                                     | 1.20E-44  |
| 2558670385 | DRAFT_01053 | EC:1.6.5.3     | NADH:ubiquinone reductase (H(+)-translocating).    |           |
| 2558670385 | DRAFT_01053 | KO:K00333      | NADH-quinone oxidoreductase subunit D [EC:1.6.5.3] | 0.00E+00  |
| 2558670385 | DRAFT_01053 | Locus_type     | CDS                                                |           |
| 2558670385 | DRAFT_01053 | Product_name   | NADH dehydrogenase subunit D (EC 1.6.5.3)          |           |
| 2558670385 | DRAFT_01053 | Scaffold       | DRAFT_contig_70_107_len_30580_read_count_534093.18 |           |
| 2558670385 | DRAFT_01053 | Coordinates    | 26152..27270(+)                                    |           |
| 2558670385 | DRAFT_01053 | DNA_length     | 1119bp                                             |           |
| 2558670385 | DRAFT_01053 | Protein_length | 372aa                                              |           |
| 2558670385 | DRAFT_01053 | GC             |                                                    | 0.58      |
| 2558670386 | DRAFT_01054 | COG_category   | [N] Cell motility                                  |           |
| 2558670386 | DRAFT_01054 | COG5491        | Conserved protein implicated in secretion          | 9.00E-14  |
| 2558670386 | DRAFT_01054 | Locus_type     | CDS                                                |           |
| 2558670386 | DRAFT_01054 | Product_name   | Conserved protein implicated in secretion          |           |
| 2558670386 | DRAFT_01054 | Scaffold       | DRAFT_contig_70_107_len_30580_read_count_534093.18 |           |
| 2558670386 | DRAFT_01054 | Coordinates    | 27566..28216(+)                                    |           |
| 2558670386 | DRAFT_01054 | DNA_length     | 651bp                                              |           |
| 2558670386 | DRAFT_01054 | Protein_length | 216aa                                              |           |
| 2558670386 | DRAFT_01054 | GC             |                                                    | 0.57      |
| 2558670387 | DRAFT_01055 | COG_category   | [K] Transcription                                  |           |
| 2558670387 | DRAFT_01055 | COG1378        | Predicted transcriptional regulators               | 6.00E-23  |
| 2558670387 | DRAFT_01055 | pfam01978      | TrmB                                               | 1.90E-17  |
| 2558670387 | DRAFT_01055 | Locus_type     | CDS                                                |           |
| 2558670387 | DRAFT_01055 | Product_name   | Predicted transcriptional regulators               |           |
| 2558670387 | DRAFT_01055 | Scaffold       | DRAFT_contig_70_107_len_30580_read_count_534093.18 |           |
| 2558670387 | DRAFT_01055 | Coordinates    | 28320..29018(-)                                    |           |
| 2558670387 | DRAFT_01055 | DNA_length     | 699bp                                              |           |
| 2558670387 | DRAFT_01055 | Protein_length | 232aa                                              |           |
| 2558670387 | DRAFT_01055 | GC             |                                                    | 0.61      |

|            |             |                |                                                    |          |
|------------|-------------|----------------|----------------------------------------------------|----------|
| 2558670388 | DRAFT_01056 | COG_category   | [C] Energy production and conversion               |          |
| 2558670388 | DRAFT_01056 | COG0644        | Dehydrogenases (flavoproteins)                     | 2.00E-36 |
| 2558670388 | DRAFT_01056 | Locus_type     | CDS                                                |          |
| 2558670388 | DRAFT_01056 | Product_name   | Dehydrogenases (flavoproteins)                     |          |
| 2558670388 | DRAFT_01056 | Scaffold       | DRAFT_contig_70_107_len_30580_read_count_534093.18 |          |
| 2558670388 | DRAFT_01056 | Coordinates    | 29073..30548(+)                                    |          |
| 2558670388 | DRAFT_01056 | DNA_length     | 1476bp                                             |          |
| 2558670388 | DRAFT_01056 | Protein_length | 491aa                                              |          |
| 2558670388 | DRAFT_01056 | GC             |                                                    | 0.58     |
| 2558670388 | DRAFT_01056 | Transmembrane  | Yes                                                |          |
| 2558670389 | DRAFT_01057 | COG_category   | [L] Replication, recombination and repair          |          |
| 2558670389 | DRAFT_01057 | COG4974        | Site-specific recombinase XerD                     | 6.00E-05 |
| 2558670389 | DRAFT_01057 | Locus_type     | CDS                                                |          |
| 2558670389 | DRAFT_01057 | Product_name   | Site-specific recombinase XerD                     |          |
| 2558670389 | DRAFT_01057 | Scaffold       | DRAFT_contig_70_118_len_28894_read_count_476415.19 |          |
| 2558670389 | DRAFT_01057 | Coordinates    | 137..1474(+)                                       |          |
| 2558670389 | DRAFT_01057 | DNA_length     | 1338bp                                             |          |
| 2558670389 | DRAFT_01057 | Protein_length | 445aa                                              |          |
| 2558670389 | DRAFT_01057 | GC             |                                                    | 0.63     |
| 2558670390 | DRAFT_01058 | Locus_type     | CDS                                                |          |
| 2558670390 | DRAFT_01058 | Product_name   | hypothetical protein                               |          |
| 2558670390 | DRAFT_01058 | Scaffold       | DRAFT_contig_70_118_len_28894_read_count_476415.19 |          |
| 2558670390 | DRAFT_01058 | Coordinates    | 1481..1663(-)                                      |          |
| 2558670390 | DRAFT_01058 | DNA_length     | 183bp                                              |          |
| 2558670390 | DRAFT_01058 | Protein_length | 60aa                                               |          |
| 2558670390 | DRAFT_01058 | GC             |                                                    | 0.65     |
| 2558670391 | DRAFT_01059 | Locus_type     | CDS                                                |          |
| 2558670391 | DRAFT_01059 | Product_name   | hypothetical protein                               |          |
| 2558670391 | DRAFT_01059 | Scaffold       | DRAFT_contig_70_118_len_28894_read_count_476415.19 |          |
| 2558670391 | DRAFT_01059 | Coordinates    | 1856..3121(+)                                      |          |

|            |             |                |                                                                      |          |
|------------|-------------|----------------|----------------------------------------------------------------------|----------|
| 2558670391 | DRAFT_01059 | DNA_length     | 1266bp                                                               |          |
| 2558670391 | DRAFT_01059 | Protein_length | 421aa                                                                |          |
| 2558670391 | DRAFT_01059 | GC             |                                                                      | 0.52     |
| 2558670392 | DRAFT_01060 | pfam07883      | Cupin_2                                                              | 1.00E-10 |
| 2558670392 | DRAFT_01060 | Locus_type     | CDS                                                                  |          |
| 2558670392 | DRAFT_01060 | Product_name   | Cupin domain                                                         |          |
| 2558670392 | DRAFT_01060 | Scaffold       | DRAFT_contig_70_118_len_28894_read_count_476415.19                   |          |
| 2558670392 | DRAFT_01060 | Coordinates    | 3569..3916(-)                                                        |          |
| 2558670392 | DRAFT_01060 | DNA_length     | 348bp                                                                |          |
| 2558670392 | DRAFT_01060 | Protein_length | 115aa                                                                |          |
| 2558670392 | DRAFT_01060 | GC             |                                                                      | 0.56     |
| 2558670393 | DRAFT_01061 | COG_category   | [P] Inorganic ion transport and metabolism                           |          |
| 2558670393 | DRAFT_01061 | COG1914        | Mn2+ and Fe2+ transporters of the NRAMP family                       | 7.00E-32 |
| 2558670393 | DRAFT_01061 | pfam01566      | Nramp                                                                | 1.20E-40 |
| 2558670393 | DRAFT_01061 | TIGR01197      | NRAMP (natural resistance-associated macrophage protein) metal ion t | 2.80E-17 |
| 2558670393 | DRAFT_01061 | Locus_type     | CDS                                                                  |          |
| 2558670393 | DRAFT_01061 | Product_name   | Mn2+ and Fe2+ transporters of the NRAMP family                       |          |
| 2558670393 | DRAFT_01061 | Scaffold       | DRAFT_contig_70_118_len_28894_read_count_476415.19                   |          |
| 2558670393 | DRAFT_01061 | Coordinates    | 4019..5179(+)                                                        |          |
| 2558670393 | DRAFT_01061 | DNA_length     | 1161bp                                                               |          |
| 2558670393 | DRAFT_01061 | Protein_length | 386aa                                                                |          |
| 2558670393 | DRAFT_01061 | GC             |                                                                      | 0.62     |
| 2558670393 | DRAFT_01061 | Transmembrane  | Yes                                                                  |          |
| 2558670394 | DRAFT_01062 | COG_category   | [V] Defense mechanisms                                               |          |
| 2558670394 | DRAFT_01062 | COG0842        | ABC-type multidrug transport system, permease component              | 1.00E-09 |
| 2558670394 | DRAFT_01062 | pfam12698      | ABC2_membrane_3                                                      | 1.20E-29 |
| 2558670394 | DRAFT_01062 | Locus_type     | CDS                                                                  |          |
| 2558670394 | DRAFT_01062 | Product_name   | ABC-type multidrug transport system, permease component              |          |
| 2558670394 | DRAFT_01062 | Scaffold       | DRAFT_contig_70_118_len_28894_read_count_476415.19                   |          |
| 2558670394 | DRAFT_01062 | Coordinates    | 5255..6382(-)                                                        |          |
| 2558670394 | DRAFT_01062 | DNA_length     | 1128bp                                                               |          |

|            |             |                |                                                                   |          |
|------------|-------------|----------------|-------------------------------------------------------------------|----------|
| 2558670394 | DRAFT_01062 | Protein_length | 375aa                                                             |          |
| 2558670394 | DRAFT_01062 | GC             |                                                                   | 0.54     |
| 2558670394 | DRAFT_01062 | Transmembrane  | Yes                                                               |          |
| 2558670395 | DRAFT_01063 | COG_category   | [P] Inorganic ion transport and metabolism                        |          |
| 2558670395 | DRAFT_01063 | COG_category   | [C] Energy production and conversion                              |          |
| 2558670395 | DRAFT_01063 | COG1668        | ABC-type Na <sup>+</sup> efflux pump, permease component          | 3.00E-06 |
| 2558670395 | DRAFT_01063 | pfam12698      | ABC2_membrane_3                                                   | 2.10E-29 |
| 2558670395 | DRAFT_01063 | Locus_type     | CDS                                                               |          |
| 2558670395 | DRAFT_01063 | Product_name   | ABC-2 family transporter protein                                  |          |
| 2558670395 | DRAFT_01063 | Scaffold       | DRAFT_contig_70_118_len_28894_read_count_476415.19                |          |
| 2558670395 | DRAFT_01063 | Coordinates    | 6379..7482(-)                                                     |          |
| 2558670395 | DRAFT_01063 | DNA_length     | 1104bp                                                            |          |
| 2558670395 | DRAFT_01063 | Protein_length | 367aa                                                             |          |
| 2558670395 | DRAFT_01063 | GC             |                                                                   | 0.55     |
| 2558670395 | DRAFT_01063 | Transmembrane  | Yes                                                               |          |
| 2558670396 | DRAFT_01064 | KEGG_module    | M00254: ABC-2 type transport system                               |          |
| 2558670396 | DRAFT_01064 | COG_category   | [V] Defense mechanisms                                            |          |
| 2558670396 | DRAFT_01064 | COG1131        | ABC-type multidrug transport system, ATPase component             | 4.00E-60 |
| 2558670396 | DRAFT_01064 | pfam00005      | ABC_tran                                                          | 4.50E-33 |
| 2558670396 | DRAFT_01064 | KO:K01990      | ABC-2 type transport system ATP-binding protein                   | 0.00E+00 |
| 2558670396 | DRAFT_01064 | Locus_type     | CDS                                                               |          |
| 2558670396 | DRAFT_01064 | Product_name   | ABC-type multidrug transport system, ATPase component             |          |
| 2558670396 | DRAFT_01064 | Scaffold       | DRAFT_contig_70_118_len_28894_read_count_476415.19                |          |
| 2558670396 | DRAFT_01064 | Coordinates    | 7479..8408(-)                                                     |          |
| 2558670396 | DRAFT_01064 | DNA_length     | 930bp                                                             |          |
| 2558670396 | DRAFT_01064 | Protein_length | 309aa                                                             |          |
| 2558670396 | DRAFT_01064 | GC             |                                                                   | 0.53     |
| 2558670397 | DRAFT_01065 | COG_category   | [U] Intracellular trafficking, secretion, and vesicular transport |          |
| 2558670397 | DRAFT_01065 | COG3267        | Type II secretory pathway, component ExeA (predicted ATPase)      | 3.00E-06 |
| 2558670397 | DRAFT_01065 | pfam01637      | Arch_ATPase                                                       | 6.10E-18 |
| 2558670397 | DRAFT_01065 | Locus_type     | CDS                                                               |          |

|            |             |                |                                                    |          |
|------------|-------------|----------------|----------------------------------------------------|----------|
| 2558670397 | DRAFT_01065 | Product_name   | Archaeal ATPase                                    |          |
| 2558670397 | DRAFT_01065 | Scaffold       | DRAFT_contig_70_118_len_28894_read_count_476415.19 |          |
| 2558670397 | DRAFT_01065 | Coordinates    | 9511..10728(+)                                     |          |
| 2558670397 | DRAFT_01065 | DNA_length     | 1218bp                                             |          |
| 2558670397 | DRAFT_01065 | Protein_length | 405aa                                              |          |
| 2558670397 | DRAFT_01065 | GC             |                                                    | 0.52     |
|            |             |                |                                                    |          |
| 2558670398 | DRAFT_01066 | Locus_type     | CDS                                                |          |
| 2558670398 | DRAFT_01066 | Product_name   | hypothetical protein                               |          |
| 2558670398 | DRAFT_01066 | Scaffold       | DRAFT_contig_70_118_len_28894_read_count_476415.19 |          |
| 2558670398 | DRAFT_01066 | Coordinates    | 10715..11797(+)                                    |          |
| 2558670398 | DRAFT_01066 | DNA_length     | 1083bp                                             |          |
| 2558670398 | DRAFT_01066 | Protein_length | 360aa                                              |          |
| 2558670398 | DRAFT_01066 | GC             |                                                    | 0.54     |
| 2558670398 | DRAFT_01066 | Transmembrane  | Yes                                                |          |
|            |             |                |                                                    |          |
| 2558670399 | DRAFT_01067 | Locus_type     | CDS                                                |          |
| 2558670399 | DRAFT_01067 | Product_name   | hypothetical protein                               |          |
| 2558670399 | DRAFT_01067 | Scaffold       | DRAFT_contig_70_118_len_28894_read_count_476415.19 |          |
| 2558670399 | DRAFT_01067 | Coordinates    | 11932..12624(-)                                    |          |
| 2558670399 | DRAFT_01067 | DNA_length     | 693bp                                              |          |
| 2558670399 | DRAFT_01067 | Protein_length | 230aa                                              |          |
| 2558670399 | DRAFT_01067 | GC             |                                                    | 0.48     |
|            |             |                |                                                    |          |
| 2558670400 | DRAFT_01068 | pfam13676      | TIR_2                                              | 4.10E-10 |
| 2558670400 | DRAFT_01068 | Locus_type     | CDS                                                |          |
| 2558670400 | DRAFT_01068 | Product_name   | TIR domain                                         |          |
| 2558670400 | DRAFT_01068 | Scaffold       | DRAFT_contig_70_118_len_28894_read_count_476415.19 |          |
| 2558670400 | DRAFT_01068 | Coordinates    | 12621..13067(-)                                    |          |
| 2558670400 | DRAFT_01068 | DNA_length     | 447bp                                              |          |
| 2558670400 | DRAFT_01068 | Protein_length | 148aa                                              |          |
| 2558670400 | DRAFT_01068 | GC             |                                                    | 0.51     |
|            |             |                |                                                    |          |
| 2558670401 | DRAFT_01069 | Locus_type     | CDS                                                |          |

|            |             |                |                                                    |      |
|------------|-------------|----------------|----------------------------------------------------|------|
| 2558670401 | DRAFT_01069 | Product_name   | hypothetical protein                               |      |
| 2558670401 | DRAFT_01069 | Scaffold       | DRAFT_contig_70_118_len_28894_read_count_476415.19 |      |
| 2558670401 | DRAFT_01069 | Coordinates    | 13147..13290(+)                                    |      |
| 2558670401 | DRAFT_01069 | DNA_length     | 144bp                                              |      |
| 2558670401 | DRAFT_01069 | Protein_length | 47aa                                               |      |
| 2558670401 | DRAFT_01069 | GC             |                                                    | 0.5  |
| 2558670401 | DRAFT_01069 | Transmembrane  | Yes                                                |      |
|            |             |                |                                                    |      |
| 2558670402 | DRAFT_01070 | Locus_type     | CDS                                                |      |
| 2558670402 | DRAFT_01070 | Product_name   | hypothetical protein                               |      |
| 2558670402 | DRAFT_01070 | Scaffold       | DRAFT_contig_70_118_len_28894_read_count_476415.19 |      |
| 2558670402 | DRAFT_01070 | Coordinates    | 13287..13991(+)                                    |      |
| 2558670402 | DRAFT_01070 | DNA_length     | 705bp                                              |      |
| 2558670402 | DRAFT_01070 | Protein_length | 234aa                                              |      |
| 2558670402 | DRAFT_01070 | GC             |                                                    | 0.46 |
|            |             |                |                                                    |      |
| 2558670403 | DRAFT_01071 | Locus_type     | CDS                                                |      |
| 2558670403 | DRAFT_01071 | Product_name   | hypothetical protein                               |      |
| 2558670403 | DRAFT_01071 | Scaffold       | DRAFT_contig_70_118_len_28894_read_count_476415.19 |      |
| 2558670403 | DRAFT_01071 | Coordinates    | 14288..14419(-)                                    |      |
| 2558670403 | DRAFT_01071 | DNA_length     | 132bp                                              |      |
| 2558670403 | DRAFT_01071 | Protein_length | 43aa                                               |      |
| 2558670403 | DRAFT_01071 | GC             |                                                    | 0.47 |
| 2558670403 | DRAFT_01071 | Transmembrane  | Yes                                                |      |
|            |             |                |                                                    |      |
| 2558670404 | DRAFT_01072 | Locus_type     | CDS                                                |      |
| 2558670404 | DRAFT_01072 | Product_name   | hypothetical protein                               |      |
| 2558670404 | DRAFT_01072 | Scaffold       | DRAFT_contig_70_118_len_28894_read_count_476415.19 |      |
| 2558670404 | DRAFT_01072 | Coordinates    | 14462..14800(+)                                    |      |
| 2558670404 | DRAFT_01072 | DNA_length     | 339bp                                              |      |
| 2558670404 | DRAFT_01072 | Protein_length | 112aa                                              |      |
| 2558670404 | DRAFT_01072 | GC             |                                                    | 0.5  |
|            |             |                |                                                    |      |
| 2558670405 | DRAFT_01073 | COG_category   | [R] General function prediction only               |      |

|            |             |                |                                                    |          |
|------------|-------------|----------------|----------------------------------------------------|----------|
| 2558670405 | DRAFT_01073 | COG1672        | Predicted ATPase (AAA+ superfamily)                | 8.00E-07 |
| 2558670405 | DRAFT_01073 | pfam01637      | Arch_ATPase                                        | 2.30E-12 |
| 2558670405 | DRAFT_01073 | Locus_type     | CDS                                                |          |
| 2558670405 | DRAFT_01073 | Product_name   | Predicted ATPase (AAA+ superfamily)                |          |
| 2558670405 | DRAFT_01073 | Scaffold       | DRAFT_contig_70_118_len_28894_read_count_476415.19 |          |
| 2558670405 | DRAFT_01073 | Coordinates    | 14848..15963(-)                                    |          |
| 2558670405 | DRAFT_01073 | DNA_length     | 1116bp                                             |          |
| 2558670405 | DRAFT_01073 | Protein_length | 371aa                                              |          |
| 2558670405 | DRAFT_01073 | GC             |                                                    | 0.47     |
| 2558670406 | DRAFT_01074 | Locus_type     | CDS                                                |          |
| 2558670406 | DRAFT_01074 | Product_name   | hypothetical protein                               |          |
| 2558670406 | DRAFT_01074 | Scaffold       | DRAFT_contig_70_118_len_28894_read_count_476415.19 |          |
| 2558670406 | DRAFT_01074 | Coordinates    | 16299..17021(-)                                    |          |
| 2558670406 | DRAFT_01074 | DNA_length     | 723bp                                              |          |
| 2558670406 | DRAFT_01074 | Protein_length | 240aa                                              |          |
| 2558670406 | DRAFT_01074 | GC             |                                                    | 0.51     |
| 2558670407 | DRAFT_01075 | Locus_type     | CDS                                                |          |
| 2558670407 | DRAFT_01075 | Product_name   | hypothetical protein                               |          |
| 2558670407 | DRAFT_01075 | Scaffold       | DRAFT_contig_70_118_len_28894_read_count_476415.19 |          |
| 2558670407 | DRAFT_01075 | Coordinates    | 17402..17572(+)                                    |          |
| 2558670407 | DRAFT_01075 | DNA_length     | 171bp                                              |          |
| 2558670407 | DRAFT_01075 | Protein_length | 56aa                                               |          |
| 2558670407 | DRAFT_01075 | GC             |                                                    | 0.53     |
| 2558670407 | DRAFT_01075 | Transmembrane  | Yes                                                |          |
| 2558670408 | DRAFT_01076 | Locus_type     | CDS                                                |          |
| 2558670408 | DRAFT_01076 | Product_name   | hypothetical protein                               |          |
| 2558670408 | DRAFT_01076 | Scaffold       | DRAFT_contig_70_118_len_28894_read_count_476415.19 |          |
| 2558670408 | DRAFT_01076 | Coordinates    | 17579..18586(+)                                    |          |
| 2558670408 | DRAFT_01076 | DNA_length     | 1008bp                                             |          |
| 2558670408 | DRAFT_01076 | Protein_length | 335aa                                              |          |
| 2558670408 | DRAFT_01076 | GC             |                                                    | 0.54     |



|            |             |                |                                                    |          |
|------------|-------------|----------------|----------------------------------------------------|----------|
| 2558670408 | DRAFT_01076 | Transmembrane  | Yes                                                |          |
| 2558670409 | DRAFT_01077 | COG_category   | [R] General function prediction only               |          |
| 2558670409 | DRAFT_01077 | COG0456        | Acetyltransferases                                 | 2.00E-05 |
| 2558670409 | DRAFT_01077 | pfam00583      | Acetyltransf_1                                     | 6.10E-13 |
| 2558670409 | DRAFT_01077 | Locus_type     | CDS                                                |          |
| 2558670409 | DRAFT_01077 | Product_name   | Acetyltransferases                                 |          |
| 2558670409 | DRAFT_01077 | Scaffold       | DRAFT_contig_70_118_len_28894_read_count_476415.19 |          |
| 2558670409 | DRAFT_01077 | Coordinates    | 19216..22482(+)                                    |          |
| 2558670409 | DRAFT_01077 | DNA_length     | 3267bp                                             |          |
| 2558670409 | DRAFT_01077 | Protein_length | 1088aa                                             |          |
| 2558670409 | DRAFT_01077 | GC             |                                                    | 0.5      |
| 2558670410 | DRAFT_01078 | pfam00583      | Acetyltransf_1                                     | 9.60E-18 |
| 2558670410 | DRAFT_01078 | Locus_type     | CDS                                                |          |
| 2558670410 | DRAFT_01078 | Product_name   | Acetyltransferases                                 |          |
| 2558670410 | DRAFT_01078 | Scaffold       | DRAFT_contig_70_118_len_28894_read_count_476415.19 |          |
| 2558670410 | DRAFT_01078 | Coordinates    | 22858..23334(-)                                    |          |
| 2558670410 | DRAFT_01078 | DNA_length     | 477bp                                              |          |
| 2558670410 | DRAFT_01078 | Protein_length | 158aa                                              |          |
| 2558670410 | DRAFT_01078 | GC             |                                                    | 0.57     |
| 2558670411 | DRAFT_01079 | Locus_type     | CDS                                                |          |
| 2558670411 | DRAFT_01079 | Product_name   | hypothetical protein                               |          |
| 2558670411 | DRAFT_01079 | Scaffold       | DRAFT_contig_70_118_len_28894_read_count_476415.19 |          |
| 2558670411 | DRAFT_01079 | Coordinates    | 23824..24249(+)                                    |          |
| 2558670411 | DRAFT_01079 | DNA_length     | 426bp                                              |          |
| 2558670411 | DRAFT_01079 | Protein_length | 141aa                                              |          |
| 2558670411 | DRAFT_01079 | GC             |                                                    | 0.59     |
| 2558670412 | DRAFT_01080 | pfam05048      | NosD                                               | 3.30E-12 |
| 2558670412 | DRAFT_01080 | TIGR03804      | parallel beta-helix repeat (two copies)            | 7.50E-14 |
| 2558670412 | DRAFT_01080 | Locus_type     | CDS                                                |          |
| 2558670412 | DRAFT_01080 | Product_name   | parallel beta-helix repeat (two copies)            |          |

|            |             |                |                                                                          |          |
|------------|-------------|----------------|--------------------------------------------------------------------------|----------|
| 2558670412 | DRAFT_01080 | Scaffold       | DRAFT_contig_70_118_len_28894_read_count_476415.19                       |          |
| 2558670412 | DRAFT_01080 | Coordinates    | 24174..24785(-)                                                          |          |
| 2558670412 | DRAFT_01080 | DNA_length     | 612bp                                                                    |          |
| 2558670412 | DRAFT_01080 | Protein_length | 203aa                                                                    |          |
| 2558670412 | DRAFT_01080 | GC             |                                                                          | 0.56     |
| 2558670412 | DRAFT_01080 | Transmembrane  | Yes                                                                      |          |
| 2558670413 | DRAFT_01081 | COG_category   | [C] Energy production and conversion                                     |          |
| 2558670413 | DRAFT_01081 | COG1032        | Fe-S oxidoreductase                                                      | 2.00E-28 |
| 2558670413 | DRAFT_01081 | pfam04055      | Radical_SAM                                                              | 6.10E-12 |
| 2558670413 | DRAFT_01081 | Locus_type     | CDS                                                                      |          |
| 2558670413 | DRAFT_01081 | Product_name   | Fe-S oxidoreductase                                                      |          |
| 2558670413 | DRAFT_01081 | Scaffold       | DRAFT_contig_70_118_len_28894_read_count_476415.19                       |          |
| 2558670413 | DRAFT_01081 | Coordinates    | 25184..26932(-)                                                          |          |
| 2558670413 | DRAFT_01081 | DNA_length     | 1749bp                                                                   |          |
| 2558670413 | DRAFT_01081 | Protein_length | 582aa                                                                    |          |
| 2558670413 | DRAFT_01081 | GC             |                                                                          | 0.58     |
| 2558670414 | DRAFT_01082 | Metacyc        | PWY-6963: ammonia assimilation cycle I                                   |          |
| 2558670414 | DRAFT_01082 | Metacyc        | GLUTAMINEFUM-PWY: glutamine degradation II                               |          |
| 2558670414 | DRAFT_01082 | Metacyc        | GLUGLSYN-PWY: glutamate biosynthesis IV                                  |          |
| 2558670414 | DRAFT_01082 | Metacyc        | GLUTSYN-PWY: glutamate biosynthesis I                                    |          |
| 2558670414 | DRAFT_01082 | COG_category   | [R] General function prediction only                                     |          |
| 2558670414 | DRAFT_01082 | COG_category   | [E] Amino acid transport and metabolism                                  |          |
| 2558670414 | DRAFT_01082 | COG0493        | NADPH-dependent glutamate synthase beta chain and related oxidoreductase | 1.00E-94 |
| 2558670414 | DRAFT_01082 | pfam07992      | Pyr_redox_2                                                              | 2.40E-10 |
| 2558670414 | DRAFT_01082 | pfam07992      | Pyr_redox_2                                                              | 4.10E-07 |
| 2558670414 | DRAFT_01082 | pfam14691      | Fer4_20                                                                  | 5.10E-30 |
| 2558670414 | DRAFT_01082 | EC:1.4.1.14    | Glutamate synthase (NADH).                                               |          |
| 2558670414 | DRAFT_01082 | EC:1.4.1.13    | Glutamate synthase (NADPH).                                              |          |
| 2558670414 | DRAFT_01082 | KO:K00266      | glutamate synthase (NADPH/NADH) small chain [EC:1.4.1.13 1.4.1.14]       | 0.00E+00 |
| 2558670414 | DRAFT_01082 | ITERM:00721    | sulfide dehydrogenase (flavoprotein) subunit SudA (EC 1.8.1.-)           |          |
| 2558670414 | DRAFT_01082 | Locus_type     | CDS                                                                      |          |
| 2558670414 | DRAFT_01082 | Product_name   | sulfide dehydrogenase (flavoprotein) subunit SudA (EC 1.8.1.-)           |          |

|            |             |                |         |                                                                                           |          |
|------------|-------------|----------------|---------|-------------------------------------------------------------------------------------------|----------|
| 2558670414 | DRAFT_01082 | Scaffold       |         | DRAFT_contig_70_118_len_28894_read_count_476415.19                                        |          |
| 2558670414 | DRAFT_01082 | Coordinates    |         | 26965..28542(+)                                                                           |          |
| 2558670414 | DRAFT_01082 | DNA_length     |         | 1578bp                                                                                    |          |
| 2558670414 | DRAFT_01082 | Protein_length |         | 525aa                                                                                     |          |
| 2558670414 | DRAFT_01082 | GC             |         |                                                                                           | 0.58     |
| 2558670415 | DRAFT_01083 | Locus_type     |         | tRNA                                                                                      |          |
| 2558670415 | DRAFT_01083 | Product_name   |         | tRNA_Glu_CTC                                                                              |          |
| 2558670415 | DRAFT_01083 | Scaffold       |         | DRAFT_contig_70_122_len_27540_read_count_414059.20                                        |          |
| 2558670415 | DRAFT_01083 | Coordinates    |         | 1..75(+)                                                                                  |          |
| 2558670415 | DRAFT_01083 | DNA_length     |         | 75bp                                                                                      |          |
| 2558670415 | DRAFT_01083 | GC             |         |                                                                                           | 0.67     |
| 2558670416 | DRAFT_01084 | pfam13353      | Fer4_12 |                                                                                           | 1.80E-10 |
| 2558670416 | DRAFT_01084 | Locus_type     |         | CDS                                                                                       |          |
| 2558670416 | DRAFT_01084 | Product_name   |         | Organic radical activating enzymes                                                        |          |
| 2558670416 | DRAFT_01084 | Scaffold       |         | DRAFT_contig_70_122_len_27540_read_count_414059.20                                        |          |
| 2558670416 | DRAFT_01084 | Coordinates    |         | 131..1534(+)                                                                              |          |
| 2558670416 | DRAFT_01084 | DNA_length     |         | 1404bp                                                                                    |          |
| 2558670416 | DRAFT_01084 | Protein_length |         | 467aa                                                                                     |          |
| 2558670416 | DRAFT_01084 | GC             |         |                                                                                           | 0.58     |
| 2558670417 | DRAFT_01085 | KEGG_module    |         | M00053: Pyrimidine deoxyribonucleotide biosynthesis, CDP/CTP => dCDP/dCTP,dTDP/dTTP       |          |
| 2558670417 | DRAFT_01085 | Metacyc        |         | PWY0-166: superpathway of pyrimidine deoxyribonucleotides <i>de novo</i> biosynthesis (E. |          |
| 2558670417 | DRAFT_01085 | Metacyc        |         | PWY-7187: pyrimidine deoxyribonucleotides <i>de novo</i> biosynthesis II                  |          |
| 2558670417 | DRAFT_01085 | Metacyc        |         | PWY-6126: adenosine nucleotides <i>de novo</i> biosynthesis                               |          |
| 2558670417 | DRAFT_01085 | Metacyc        |         | PWY-6125: guanosine nucleotides <i>de novo</i> biosynthesis                               |          |
| 2558670417 | DRAFT_01085 | COG_category   |         | [F] Nucleotide transport and metabolism                                                   |          |
| 2558670417 | DRAFT_01085 | COG1328        |         | Oxygen-sensitive ribonucleoside-triphosphate reductase                                    | 5.00E-80 |
| 2558670417 | DRAFT_01085 | pfam13597      |         | NRDD                                                                                      | 7.00E-55 |
| 2558670417 | DRAFT_01085 | pfam13597      |         | NRDD                                                                                      | 1.50E-06 |
| 2558670417 | DRAFT_01085 | EC:1.17.4.2    |         | Ribonucleoside-triphosphate reductase.                                                    |          |
| 2558670417 | DRAFT_01085 | TIGR02487      |         | anaerobic ribonucleoside-triphosphate reductase                                           | 1.10E-91 |
| 2558670417 | DRAFT_01085 | KO:K00527      |         | ribonucleoside-triphosphate reductase [EC:1.17.4.2]                                       | 0.00E+00 |

|            |             |                |                                                                                 |          |
|------------|-------------|----------------|---------------------------------------------------------------------------------|----------|
| 2558670417 | DRAFT_01085 | ITERM:00735    | ribonucleoside-triphosphate reductase class III catalytic subunit (EC 1.17.4.2) |          |
| 2558670417 | DRAFT_01085 | Locus_type     | CDS                                                                             |          |
| 2558670417 | DRAFT_01085 | Product_name   | ribonucleoside-triphosphate reductase class III catalytic subunit (EC 1.        |          |
| 2558670417 | DRAFT_01085 | Scaffold       | DRAFT_contig_70_122_len_27540_read_count_414059.20                              |          |
| 2558670417 | DRAFT_01085 | Coordinates    | 1527..3239(+)                                                                   |          |
| 2558670417 | DRAFT_01085 | DNA_length     | 1713bp                                                                          |          |
| 2558670417 | DRAFT_01085 | Protein_length | 570aa                                                                           |          |
| 2558670417 | DRAFT_01085 | GC             |                                                                                 | 0.56     |
|            |             |                |                                                                                 |          |
| 2558670418 | DRAFT_01086 | COG_category   | [F] Nucleotide transport and metabolism                                         |          |
| 2558670418 | DRAFT_01086 | COG0125        | Thymidylate kinase                                                              | 6.00E-12 |
| 2558670418 | DRAFT_01086 | pfam02223      | Thymidylate_kin                                                                 | 4.90E-15 |
| 2558670418 | DRAFT_01086 | Locus_type     | CDS                                                                             |          |
| 2558670418 | DRAFT_01086 | Product_name   | Thymidylate kinase                                                              |          |
| 2558670418 | DRAFT_01086 | Scaffold       | DRAFT_contig_70_122_len_27540_read_count_414059.20                              |          |
| 2558670418 | DRAFT_01086 | Coordinates    | 3239..3862(+)                                                                   |          |
| 2558670418 | DRAFT_01086 | DNA_length     | 624bp                                                                           |          |
| 2558670418 | DRAFT_01086 | Protein_length | 207aa                                                                           |          |
| 2558670418 | DRAFT_01086 | GC             |                                                                                 | 0.54     |
|            |             |                |                                                                                 |          |
| 2558670419 | DRAFT_01087 | pfam13306      | LRR_5                                                                           | 2.90E-12 |
| 2558670419 | DRAFT_01087 | pfam13306      | LRR_5                                                                           | 9.00E-22 |
| 2558670419 | DRAFT_01087 | pfam13306      | LRR_5                                                                           | 4.50E-10 |
| 2558670419 | DRAFT_01087 | pfam13306      | LRR_5                                                                           | 3.60E-08 |
| 2558670419 | DRAFT_01087 | Locus_type     | CDS                                                                             |          |
| 2558670419 | DRAFT_01087 | Product_name   | Leucine rich repeats (6 copies)                                                 |          |
| 2558670419 | DRAFT_01087 | Scaffold       | DRAFT_contig_70_122_len_27540_read_count_414059.20                              |          |
| 2558670419 | DRAFT_01087 | Coordinates    | 3864..5642(+)                                                                   |          |
| 2558670419 | DRAFT_01087 | DNA_length     | 1779bp                                                                          |          |
| 2558670419 | DRAFT_01087 | Protein_length | 592aa                                                                           |          |
| 2558670419 | DRAFT_01087 | GC             |                                                                                 | 0.56     |
|            |             |                |                                                                                 |          |
| 2558670420 | DRAFT_01088 | COG_category   | [G] Carbohydrate transport and metabolism                                       |          |
| 2558670420 | DRAFT_01088 | COG1082        | Sugar phosphate isomerases/epimerases                                           | 3.00E-21 |

|            |             |                |              |                                                    |          |
|------------|-------------|----------------|--------------|----------------------------------------------------|----------|
| 2558670420 | DRAFT_01088 | pfam01261      | AP_endonuc_2 |                                                    | 3.30E-25 |
| 2558670420 | DRAFT_01088 | Locus_type     |              | CDS                                                |          |
| 2558670420 | DRAFT_01088 | Product_name   |              | Sugar phosphate isomerases/epimerases              |          |
| 2558670420 | DRAFT_01088 | Scaffold       |              | DRAFT_contig_70_122_len_27540_read_count_414059.20 |          |
| 2558670420 | DRAFT_01088 | Coordinates    |              | 5669..6442(-)                                      |          |
| 2558670420 | DRAFT_01088 | DNA_length     |              | 774bp                                              |          |
| 2558670420 | DRAFT_01088 | Protein_length |              | 257aa                                              |          |
| 2558670420 | DRAFT_01088 | GC             |              |                                                    | 0.54     |
|            |             |                |              |                                                    |          |
| 2558670421 | DRAFT_01089 | pfam01555      | N6_N4_Mtase  |                                                    | 1.80E-34 |
| 2558670421 | DRAFT_01089 | Locus_type     |              | CDS                                                |          |
| 2558670421 | DRAFT_01089 | Product_name   |              | Adenine specific DNA methylase Mod                 |          |
| 2558670421 | DRAFT_01089 | Scaffold       |              | DRAFT_contig_70_122_len_27540_read_count_414059.20 |          |
| 2558670421 | DRAFT_01089 | Coordinates    |              | 6682..7800(+)                                      |          |
| 2558670421 | DRAFT_01089 | DNA_length     |              | 1119bp                                             |          |
| 2558670421 | DRAFT_01089 | Protein_length |              | 372aa                                              |          |
| 2558670421 | DRAFT_01089 | GC             |              |                                                    | 0.52     |
|            |             |                |              |                                                    |          |
| 2558670422 | DRAFT_01090 | Locus_type     |              | CDS                                                |          |
| 2558670422 | DRAFT_01090 | Product_name   |              | hypothetical protein                               |          |
| 2558670422 | DRAFT_01090 | Scaffold       |              | DRAFT_contig_70_122_len_27540_read_count_414059.20 |          |
| 2558670422 | DRAFT_01090 | Coordinates    |              | 7915..8280(-)                                      |          |
| 2558670422 | DRAFT_01090 | DNA_length     |              | 366bp                                              |          |
| 2558670422 | DRAFT_01090 | Protein_length |              | 121aa                                              |          |
| 2558670422 | DRAFT_01090 | GC             |              |                                                    | 0.48     |
|            |             |                |              |                                                    |          |
| 2558670423 | DRAFT_01091 | Locus_type     |              | CDS                                                |          |
| 2558670423 | DRAFT_01091 | Product_name   |              | hypothetical protein                               |          |
| 2558670423 | DRAFT_01091 | Scaffold       |              | DRAFT_contig_70_122_len_27540_read_count_414059.20 |          |
| 2558670423 | DRAFT_01091 | Coordinates    |              | 8424..8612(-)                                      |          |
| 2558670423 | DRAFT_01091 | DNA_length     |              | 189bp                                              |          |
| 2558670423 | DRAFT_01091 | Protein_length |              | 62aa                                               |          |
| 2558670423 | DRAFT_01091 | GC             |              |                                                    | 0.52     |

|            |             |                |                                                    |      |
|------------|-------------|----------------|----------------------------------------------------|------|
| 2558670424 | DRAFT_01092 | Locus_type     | CDS                                                |      |
| 2558670424 | DRAFT_01092 | Product_name   | hypothetical protein                               |      |
| 2558670424 | DRAFT_01092 | Scaffold       | DRAFT_contig_70_122_len_27540_read_count_414059.20 |      |
| 2558670424 | DRAFT_01092 | Coordinates    | 8660..9379(-)                                      |      |
| 2558670424 | DRAFT_01092 | DNA_length     | 720bp                                              |      |
| 2558670424 | DRAFT_01092 | Protein_length | 239aa                                              |      |
| 2558670424 | DRAFT_01092 | GC             |                                                    | 0.51 |
|            |             |                |                                                    |      |
| 2558670425 | DRAFT_01093 | Locus_type     | CDS                                                |      |
| 2558670425 | DRAFT_01093 | Product_name   | hypothetical protein                               |      |
| 2558670425 | DRAFT_01093 | Scaffold       | DRAFT_contig_70_122_len_27540_read_count_414059.20 |      |
| 2558670425 | DRAFT_01093 | Coordinates    | 9369..10184(-)                                     |      |
| 2558670425 | DRAFT_01093 | DNA_length     | 816bp                                              |      |
| 2558670425 | DRAFT_01093 | Protein_length | 271aa                                              |      |
| 2558670425 | DRAFT_01093 | GC             |                                                    | 0.58 |
| 2558670425 | DRAFT_01093 | Transmembrane  | Yes                                                |      |
|            |             |                |                                                    |      |
| 2558670426 | DRAFT_01094 | Locus_type     | CDS                                                |      |
| 2558670426 | DRAFT_01094 | Product_name   | hypothetical protein                               |      |
| 2558670426 | DRAFT_01094 | Scaffold       | DRAFT_contig_70_122_len_27540_read_count_414059.20 |      |
| 2558670426 | DRAFT_01094 | Coordinates    | 10181..10717(-)                                    |      |
| 2558670426 | DRAFT_01094 | DNA_length     | 537bp                                              |      |
| 2558670426 | DRAFT_01094 | Protein_length | 178aa                                              |      |
| 2558670426 | DRAFT_01094 | GC             |                                                    | 0.51 |
|            |             |                |                                                    |      |
| 2558670427 | DRAFT_01095 | Locus_type     | CDS                                                |      |
| 2558670427 | DRAFT_01095 | Product_name   | hypothetical protein                               |      |
| 2558670427 | DRAFT_01095 | Scaffold       | DRAFT_contig_70_122_len_27540_read_count_414059.20 |      |
| 2558670427 | DRAFT_01095 | Coordinates    | 10797..11351(-)                                    |      |
| 2558670427 | DRAFT_01095 | DNA_length     | 555bp                                              |      |
| 2558670427 | DRAFT_01095 | Protein_length | 184aa                                              |      |
| 2558670427 | DRAFT_01095 | GC             |                                                    | 0.49 |
|            |             |                |                                                    |      |
| 2558670428 | DRAFT_01096 | Locus_type     | CDS                                                |      |

|            |             |                |              |                                                    |          |
|------------|-------------|----------------|--------------|----------------------------------------------------|----------|
| 2558670428 | DRAFT_01096 | Product_name   |              | hypothetical protein                               |          |
| 2558670428 | DRAFT_01096 | Scaffold       |              | DRAFT_contig_70_122_len_27540_read_count_414059.20 |          |
| 2558670428 | DRAFT_01096 | Coordinates    |              | 11359..11586(-)                                    |          |
| 2558670428 | DRAFT_01096 | DNA_length     |              | 228bp                                              |          |
| 2558670428 | DRAFT_01096 | Protein_length |              | 75aa                                               |          |
| 2558670428 | DRAFT_01096 | GC             |              |                                                    | 0.53     |
|            |             |                |              |                                                    |          |
| 2558670429 | DRAFT_01097 | Locus_type     |              | CDS                                                |          |
| 2558670429 | DRAFT_01097 | Product_name   |              | hypothetical protein                               |          |
| 2558670429 | DRAFT_01097 | Scaffold       |              | DRAFT_contig_70_122_len_27540_read_count_414059.20 |          |
| 2558670429 | DRAFT_01097 | Coordinates    |              | 11780..12178(+)                                    |          |
| 2558670429 | DRAFT_01097 | DNA_length     |              | 399bp                                              |          |
| 2558670429 | DRAFT_01097 | Protein_length |              | 132aa                                              |          |
| 2558670429 | DRAFT_01097 | GC             |              |                                                    | 0.5      |
|            |             |                |              |                                                    |          |
| 2558670430 | DRAFT_01098 | Locus_type     |              | CDS                                                |          |
| 2558670430 | DRAFT_01098 | Product_name   |              | hypothetical protein                               |          |
| 2558670430 | DRAFT_01098 | Scaffold       |              | DRAFT_contig_70_122_len_27540_read_count_414059.20 |          |
| 2558670430 | DRAFT_01098 | Coordinates    |              | 12386..13408(-)                                    |          |
| 2558670430 | DRAFT_01098 | DNA_length     |              | 1023bp                                             |          |
| 2558670430 | DRAFT_01098 | Protein_length |              | 340aa                                              |          |
| 2558670430 | DRAFT_01098 | GC             |              |                                                    | 0.47     |
| 2558670430 | DRAFT_01098 | Transmembrane  |              | Yes                                                |          |
|            |             |                |              |                                                    |          |
| 2558670431 | DRAFT_01099 | pfam01909      | NTP_transf_2 |                                                    | 2.20E-06 |
| 2558670431 | DRAFT_01099 | Locus_type     |              | CDS                                                |          |
| 2558670431 | DRAFT_01099 | Product_name   |              | Nucleotidyltransferase domain                      |          |
| 2558670431 | DRAFT_01099 | Scaffold       |              | DRAFT_contig_70_122_len_27540_read_count_414059.20 |          |
| 2558670431 | DRAFT_01099 | Coordinates    |              | 13533..14405(+)                                    |          |
| 2558670431 | DRAFT_01099 | DNA_length     |              | 873bp                                              |          |
| 2558670431 | DRAFT_01099 | Protein_length |              | 290aa                                              |          |
| 2558670431 | DRAFT_01099 | GC             |              |                                                    | 0.5      |
|            |             |                |              |                                                    |          |
| 2558670432 | DRAFT_01100 | Locus_type     |              | CDS                                                |          |

|            |             |                |        |                                                             |          |
|------------|-------------|----------------|--------|-------------------------------------------------------------|----------|
| 2558670432 | DRAFT_01100 | Product_name   |        | hypothetical protein                                        |          |
| 2558670432 | DRAFT_01100 | Scaffold       |        | DRAFT_contig_70_122_len_27540_read_count_414059.20          |          |
| 2558670432 | DRAFT_01100 | Coordinates    |        | 14411..14548(-)                                             |          |
| 2558670432 | DRAFT_01100 | DNA_length     |        | 138bp                                                       |          |
| 2558670432 | DRAFT_01100 | Protein_length |        | 45aa                                                        |          |
| 2558670432 | DRAFT_01100 | GC             |        |                                                             | 0.49     |
|            |             |                |        |                                                             |          |
| 2558670433 | DRAFT_01101 | pfam04307      | DUF457 |                                                             | 3.50E-10 |
| 2558670433 | DRAFT_01101 | Locus_type     |        | CDS                                                         |          |
| 2558670433 | DRAFT_01101 | Product_name   |        | Predicted membrane-bound metal-dependent hydrolase (DUF457) |          |
| 2558670433 | DRAFT_01101 | Scaffold       |        | DRAFT_contig_70_122_len_27540_read_count_414059.20          |          |
| 2558670433 | DRAFT_01101 | Coordinates    |        | 14545..15009(-)                                             |          |
| 2558670433 | DRAFT_01101 | DNA_length     |        | 465bp                                                       |          |
| 2558670433 | DRAFT_01101 | Protein_length |        | 154aa                                                       |          |
| 2558670433 | DRAFT_01101 | GC             |        |                                                             | 0.52     |
| 2558670433 | DRAFT_01101 | Transmembrane  |        | Yes                                                         |          |
|            |             |                |        |                                                             |          |
| 2558670434 | DRAFT_01102 | Locus_type     |        | CDS                                                         |          |
| 2558670434 | DRAFT_01102 | Product_name   |        | hypothetical protein                                        |          |
| 2558670434 | DRAFT_01102 | Scaffold       |        | DRAFT_contig_70_122_len_27540_read_count_414059.20          |          |
| 2558670434 | DRAFT_01102 | Coordinates    |        | 15592..17382(-)                                             |          |
| 2558670434 | DRAFT_01102 | DNA_length     |        | 1791bp                                                      |          |
| 2558670434 | DRAFT_01102 | Protein_length |        | 596aa                                                       |          |
| 2558670434 | DRAFT_01102 | GC             |        |                                                             | 0.49     |
|            |             |                |        |                                                             |          |
| 2558670435 | DRAFT_01103 | Locus_type     |        | CDS                                                         |          |
| 2558670435 | DRAFT_01103 | Product_name   |        | hypothetical protein                                        |          |
| 2558670435 | DRAFT_01103 | Scaffold       |        | DRAFT_contig_70_122_len_27540_read_count_414059.20          |          |
| 2558670435 | DRAFT_01103 | Coordinates    |        | 17379..18278(-)                                             |          |
| 2558670435 | DRAFT_01103 | DNA_length     |        | 900bp                                                       |          |
| 2558670435 | DRAFT_01103 | Protein_length |        | 299aa                                                       |          |
| 2558670435 | DRAFT_01103 | GC             |        |                                                             | 0.51     |
|            |             |                |        |                                                             |          |
| 2558670436 | DRAFT_01104 | Locus_type     |        | CDS                                                         |          |



|            |             |                |                                                    |          |
|------------|-------------|----------------|----------------------------------------------------|----------|
| 2558670436 | DRAFT_01104 | Product_name   | hypothetical protein                               |          |
| 2558670436 | DRAFT_01104 | Scaffold       | DRAFT_contig_70_122_len_27540_read_count_414059.20 |          |
| 2558670436 | DRAFT_01104 | Coordinates    | 18286..18456(+)                                    |          |
| 2558670436 | DRAFT_01104 | DNA_length     | 171bp                                              |          |
| 2558670436 | DRAFT_01104 | Protein_length | 56aa                                               |          |
| 2558670436 | DRAFT_01104 | GC             |                                                    | 0.52     |
|            |             |                |                                                    |          |
| 2558670437 | DRAFT_01105 | Locus_type     | CDS                                                |          |
| 2558670437 | DRAFT_01105 | Product_name   | hypothetical protein                               |          |
| 2558670437 | DRAFT_01105 | Scaffold       | DRAFT_contig_70_122_len_27540_read_count_414059.20 |          |
| 2558670437 | DRAFT_01105 | Coordinates    | 18463..19164(+)                                    |          |
| 2558670437 | DRAFT_01105 | DNA_length     | 702bp                                              |          |
| 2558670437 | DRAFT_01105 | Protein_length | 233aa                                              |          |
| 2558670437 | DRAFT_01105 | GC             |                                                    | 0.53     |
| 2558670437 | DRAFT_01105 | Transmembrane  | Yes                                                |          |
|            |             |                |                                                    |          |
| 2558670438 | DRAFT_01106 | COG_category   | [R] General function prediction only               |          |
| 2558670438 | DRAFT_01106 | COG0433        | Predicted ATPase                                   | 1.00E-08 |
| 2558670438 | DRAFT_01106 | pfam12846      | AAA_10                                             | 1.60E-26 |
| 2558670438 | DRAFT_01106 | Locus_type     | CDS                                                |          |
| 2558670438 | DRAFT_01106 | Product_name   | Predicted ATPase                                   |          |
| 2558670438 | DRAFT_01106 | Scaffold       | DRAFT_contig_70_122_len_27540_read_count_414059.20 |          |
| 2558670438 | DRAFT_01106 | Coordinates    | 19217..21892(+)                                    |          |
| 2558670438 | DRAFT_01106 | DNA_length     | 2676bp                                             |          |
| 2558670438 | DRAFT_01106 | Protein_length | 891aa                                              |          |
| 2558670438 | DRAFT_01106 | GC             |                                                    | 0.52     |
|            |             |                |                                                    |          |
| 2558670439 | DRAFT_01107 | Locus_type     | CDS                                                |          |
| 2558670439 | DRAFT_01107 | Product_name   | hypothetical protein                               |          |
| 2558670439 | DRAFT_01107 | Scaffold       | DRAFT_contig_70_122_len_27540_read_count_414059.20 |          |
| 2558670439 | DRAFT_01107 | Coordinates    | 21905..22141(+)                                    |          |
| 2558670439 | DRAFT_01107 | DNA_length     | 237bp                                              |          |
| 2558670439 | DRAFT_01107 | Protein_length | 78aa                                               |          |
| 2558670439 | DRAFT_01107 | GC             |                                                    | 0.55     |

|            |             |                |                                                    |          |
|------------|-------------|----------------|----------------------------------------------------|----------|
| 2558670440 | DRAFT_01108 | Locus_type     | CDS                                                |          |
| 2558670440 | DRAFT_01108 | Product_name   | hypothetical protein                               |          |
| 2558670440 | DRAFT_01108 | Scaffold       | DRAFT_contig_70_122_len_27540_read_count_414059.20 |          |
| 2558670440 | DRAFT_01108 | Coordinates    | 22189..22473(+)                                    |          |
| 2558670440 | DRAFT_01108 | DNA_length     | 285bp                                              |          |
| 2558670440 | DRAFT_01108 | Protein_length | 94aa                                               |          |
| 2558670440 | DRAFT_01108 | GC             |                                                    | 0.46     |
| 2558670441 | DRAFT_01109 | COG_category   | [S] Function unknown                               |          |
| 2558670441 | DRAFT_01109 | COG5616        | Predicted integral membrane protein                | 3.00E-33 |
| 2558670441 | DRAFT_01109 | pfam13414      | TPR_11                                             | 2.30E-10 |
| 2558670441 | DRAFT_01109 | pfam00211      | Guanylate_cyc                                      | 2.30E-28 |
| 2558670441 | DRAFT_01109 | EC:4.6.1.1     | Adenylate cyclase.                                 |          |
| 2558670441 | DRAFT_01109 | KO:K01768      | adenylate cyclase [EC:4.6.1.1]                     | 0.00E+00 |
| 2558670441 | DRAFT_01109 | Locus_type     | CDS                                                |          |
| 2558670441 | DRAFT_01109 | Product_name   | Predicted integral membrane protein                |          |
| 2558670441 | DRAFT_01109 | Scaffold       | DRAFT_contig_70_122_len_27540_read_count_414059.20 |          |
| 2558670441 | DRAFT_01109 | Coordinates    | 22952..24895(+)                                    |          |
| 2558670441 | DRAFT_01109 | DNA_length     | 1944bp                                             |          |
| 2558670441 | DRAFT_01109 | Protein_length | 647aa                                              |          |
| 2558670441 | DRAFT_01109 | GC             |                                                    | 0.56     |
| 2558670441 | DRAFT_01109 | Fused_gene     | Yes                                                |          |
| 2558670442 | DRAFT_01110 | pfam13240      | zinc_ribbon_2                                      | 5.40E-07 |
| 2558670442 | DRAFT_01110 | pfam06271      | RDD                                                | 6.50E-21 |
| 2558670442 | DRAFT_01110 | Locus_type     | CDS                                                |          |
| 2558670442 | DRAFT_01110 | Product_name   | zinc-ribbon domain/RDD family                      |          |
| 2558670442 | DRAFT_01110 | Scaffold       | DRAFT_contig_70_122_len_27540_read_count_414059.20 |          |
| 2558670442 | DRAFT_01110 | Coordinates    | 25081..25647(-)                                    |          |
| 2558670442 | DRAFT_01110 | DNA_length     | 567bp                                              |          |
| 2558670442 | DRAFT_01110 | Protein_length | 188aa                                              |          |
| 2558670442 | DRAFT_01110 | GC             |                                                    | 0.58     |
| 2558670442 | DRAFT_01110 | Transmembrane  | Yes                                                |          |

|            |             |                |                                                    |          |
|------------|-------------|----------------|----------------------------------------------------|----------|
| 2558670443 | DRAFT_01111 | Locus_type     | CDS                                                |          |
| 2558670443 | DRAFT_01111 | Product_name   | hypothetical protein                               |          |
| 2558670443 | DRAFT_01111 | Scaffold       | DRAFT_contig_70_122_len_27540_read_count_414059.20 |          |
| 2558670443 | DRAFT_01111 | Coordinates    | 25842..26048(+)                                    |          |
| 2558670443 | DRAFT_01111 | DNA_length     | 207bp                                              |          |
| 2558670443 | DRAFT_01111 | Protein_length | 68aa                                               |          |
| 2558670443 | DRAFT_01111 | GC             |                                                    | 0.52     |
|            |             |                |                                                    |          |
| 2558670444 | DRAFT_01112 | COG_category   | [R] General function prediction only               |          |
| 2558670444 | DRAFT_01112 | COG0456        | Acetyltransferases                                 | 3.00E-06 |
| 2558670444 | DRAFT_01112 | pfam13673      | Acetyltransf_10                                    | 3.90E-13 |
| 2558670444 | DRAFT_01112 | Locus_type     | CDS                                                |          |
| 2558670444 | DRAFT_01112 | Product_name   | Acetyltransferases                                 |          |
| 2558670444 | DRAFT_01112 | Scaffold       | DRAFT_contig_70_122_len_27540_read_count_414059.20 |          |
| 2558670444 | DRAFT_01112 | Coordinates    | 26116..26610(-)                                    |          |
| 2558670444 | DRAFT_01112 | DNA_length     | 495bp                                              |          |
| 2558670444 | DRAFT_01112 | Protein_length | 164aa                                              |          |
| 2558670444 | DRAFT_01112 | GC             |                                                    | 0.54     |
|            |             |                |                                                    |          |
| 2558670445 | DRAFT_01113 | Locus_type     | CDS                                                |          |
| 2558670445 | DRAFT_01113 | Product_name   | hypothetical protein                               |          |
| 2558670445 | DRAFT_01113 | Scaffold       | DRAFT_contig_70_122_len_27540_read_count_414059.20 |          |
| 2558670445 | DRAFT_01113 | Coordinates    | 26922..27539(-)                                    |          |
| 2558670445 | DRAFT_01113 | DNA_length     | 618bp                                              |          |
| 2558670445 | DRAFT_01113 | Protein_length | 205aa                                              |          |
| 2558670445 | DRAFT_01113 | GC             |                                                    | 0.61     |
| 2558670445 | DRAFT_01113 | Transmembrane  | Yes                                                |          |
|            |             |                |                                                    |          |
| 2558670446 | DRAFT_01114 | Locus_type     | CDS                                                |          |
| 2558670446 | DRAFT_01114 | Product_name   | hypothetical protein                               |          |
| 2558670446 | DRAFT_01114 | Scaffold       | DRAFT_contig_70_133_len_26431_read_count_520883.21 |          |
| 2558670446 | DRAFT_01114 | Coordinates    | 549..995(+)                                        |          |
| 2558670446 | DRAFT_01114 | DNA_length     | 447bp                                              |          |

|            |             |                |                                                           |          |
|------------|-------------|----------------|-----------------------------------------------------------|----------|
| 2558670446 | DRAFT_01114 | Protein_length | 148aa                                                     |          |
| 2558670446 | DRAFT_01114 | GC             |                                                           | 0.57     |
| 2558670447 | DRAFT_01115 | pfam13847      | Methyltransf_31                                           | 5.90E-15 |
| 2558670447 | DRAFT_01115 | TIGR01444      | methyltransferase, FkbM family                            | 4.20E-11 |
| 2558670447 | DRAFT_01115 | Locus_type     | CDS                                                       |          |
| 2558670447 | DRAFT_01115 | Product_name   | Methylase involved in ubiquinone/menaquinone biosynthesis |          |
| 2558670447 | DRAFT_01115 | Scaffold       | DRAFT_contig_70_133_len_26431_read_count_520883.21        |          |
| 2558670447 | DRAFT_01115 | Coordinates    | 1100..1627(+)                                             |          |
| 2558670447 | DRAFT_01115 | DNA_length     | 528bp                                                     |          |
| 2558670447 | DRAFT_01115 | Protein_length | 175aa                                                     |          |
| 2558670447 | DRAFT_01115 | GC             |                                                           | 0.57     |
| 2558670448 | DRAFT_01116 | Locus_type     | CDS                                                       |          |
| 2558670448 | DRAFT_01116 | Product_name   | hypothetical protein                                      |          |
| 2558670448 | DRAFT_01116 | Scaffold       | DRAFT_contig_70_133_len_26431_read_count_520883.21        |          |
| 2558670448 | DRAFT_01116 | Coordinates    | 1781..2680(+)                                             |          |
| 2558670448 | DRAFT_01116 | DNA_length     | 900bp                                                     |          |
| 2558670448 | DRAFT_01116 | Protein_length | 299aa                                                     |          |
| 2558670448 | DRAFT_01116 | GC             |                                                           | 0.54     |
| 2558670448 | DRAFT_01116 | Transmembrane  | Yes                                                       |          |
| 2558670449 | DRAFT_01117 | Locus_type     | tRNA                                                      |          |
| 2558670449 | DRAFT_01117 | Product_name   | tRNA_Pseudo_GTG                                           |          |
| 2558670449 | DRAFT_01117 | Scaffold       | DRAFT_contig_70_133_len_26431_read_count_520883.21        |          |
| 2558670449 | DRAFT_01117 | Coordinates    | 2867..2953(+)                                             |          |
| 2558670449 | DRAFT_01117 | DNA_length     | 75bp                                                      |          |
| 2558670449 | DRAFT_01117 | GC             |                                                           | 0.59     |
| 2558670450 | DRAFT_01118 | Locus_type     | CDS                                                       |          |
| 2558670450 | DRAFT_01118 | Product_name   | hypothetical protein                                      |          |
| 2558670450 | DRAFT_01118 | Scaffold       | DRAFT_contig_70_133_len_26431_read_count_520883.21        |          |
| 2558670450 | DRAFT_01118 | Coordinates    | 3091..3453(+)                                             |          |
| 2558670450 | DRAFT_01118 | DNA_length     | 363bp                                                     |          |

|            |             |                |                                                    |      |
|------------|-------------|----------------|----------------------------------------------------|------|
| 2558670450 | DRAFT_01118 | Protein_length | 120aa                                              |      |
| 2558670450 | DRAFT_01118 | GC             |                                                    | 0.51 |
| 2558670450 | DRAFT_01118 | Transmembrane  | Yes                                                |      |
| 2558670451 | DRAFT_01119 | Locus_type     | CDS                                                |      |
| 2558670451 | DRAFT_01119 | Product_name   | hypothetical protein                               |      |
| 2558670451 | DRAFT_01119 | Scaffold       | DRAFT_contig_70_133_len_26431_read_count_520883.21 |      |
| 2558670451 | DRAFT_01119 | Coordinates    | 3434..3751(-)                                      |      |
| 2558670451 | DRAFT_01119 | DNA_length     | 318bp                                              |      |
| 2558670451 | DRAFT_01119 | Protein_length | 105aa                                              |      |
| 2558670451 | DRAFT_01119 | GC             |                                                    | 0.5  |
| 2558670452 | DRAFT_01120 | Locus_type     | CDS                                                |      |
| 2558670452 | DRAFT_01120 | Product_name   | hypothetical protein                               |      |
| 2558670452 | DRAFT_01120 | Scaffold       | DRAFT_contig_70_133_len_26431_read_count_520883.21 |      |
| 2558670452 | DRAFT_01120 | Coordinates    | 3954..4205(+)                                      |      |
| 2558670452 | DRAFT_01120 | DNA_length     | 252bp                                              |      |
| 2558670452 | DRAFT_01120 | Protein_length | 83aa                                               |      |
| 2558670452 | DRAFT_01120 | GC             |                                                    | 0.46 |
| 2558670453 | DRAFT_01121 | Locus_type     | CDS                                                |      |
| 2558670453 | DRAFT_01121 | Product_name   | hypothetical protein                               |      |
| 2558670453 | DRAFT_01121 | Scaffold       | DRAFT_contig_70_133_len_26431_read_count_520883.21 |      |
| 2558670453 | DRAFT_01121 | Coordinates    | 4233..4550(+)                                      |      |
| 2558670453 | DRAFT_01121 | DNA_length     | 318bp                                              |      |
| 2558670453 | DRAFT_01121 | Protein_length | 105aa                                              |      |
| 2558670453 | DRAFT_01121 | GC             |                                                    | 0.47 |
| 2558670454 | DRAFT_01122 | Locus_type     | CDS                                                |      |
| 2558670454 | DRAFT_01122 | Product_name   | hypothetical protein                               |      |
| 2558670454 | DRAFT_01122 | Scaffold       | DRAFT_contig_70_133_len_26431_read_count_520883.21 |      |
| 2558670454 | DRAFT_01122 | Coordinates    | 4615..5127(+)                                      |      |
| 2558670454 | DRAFT_01122 | DNA_length     | 513bp                                              |      |
| 2558670454 | DRAFT_01122 | Protein_length | 170aa                                              |      |

|            |             |                |                                                    |          |
|------------|-------------|----------------|----------------------------------------------------|----------|
| 2558670454 | DRAFT_01122 | GC             |                                                    | 0.48     |
| 2558670454 | DRAFT_01122 | Transmembrane  | Yes                                                |          |
| 2558670455 | DRAFT_01123 | Locus_type     | CDS                                                |          |
| 2558670455 | DRAFT_01123 | Product_name   | hypothetical protein                               |          |
| 2558670455 | DRAFT_01123 | Scaffold       | DRAFT_contig_70_133_len_26431_read_count_520883.21 |          |
| 2558670455 | DRAFT_01123 | Coordinates    | 5273..5392(+)                                      |          |
| 2558670455 | DRAFT_01123 | DNA_length     | 120bp                                              |          |
| 2558670455 | DRAFT_01123 | Protein_length | 39aa                                               |          |
| 2558670455 | DRAFT_01123 | GC             |                                                    | 0.45     |
| 2558670456 | DRAFT_01124 | Locus_type     | CDS                                                |          |
| 2558670456 | DRAFT_01124 | Product_name   | hypothetical protein                               |          |
| 2558670456 | DRAFT_01124 | Scaffold       | DRAFT_contig_70_133_len_26431_read_count_520883.21 |          |
| 2558670456 | DRAFT_01124 | Coordinates    | 5376..6149(+)                                      |          |
| 2558670456 | DRAFT_01124 | DNA_length     | 774bp                                              |          |
| 2558670456 | DRAFT_01124 | Protein_length | 257aa                                              |          |
| 2558670456 | DRAFT_01124 | GC             |                                                    | 0.51     |
| 2558670457 | DRAFT_01125 | Locus_type     | CDS                                                |          |
| 2558670457 | DRAFT_01125 | Product_name   | hypothetical protein                               |          |
| 2558670457 | DRAFT_01125 | Scaffold       | DRAFT_contig_70_133_len_26431_read_count_520883.21 |          |
| 2558670457 | DRAFT_01125 | Coordinates    | 6489..6650(-)                                      |          |
| 2558670457 | DRAFT_01125 | DNA_length     | 162bp                                              |          |
| 2558670457 | DRAFT_01125 | Protein_length | 53aa                                               |          |
| 2558670457 | DRAFT_01125 | GC             |                                                    | 0.54     |
| 2558670458 | DRAFT_01126 | COG_category   | [E] Amino acid transport and metabolism            |          |
| 2558670458 | DRAFT_01126 | COG0520        | Selenocysteine lyase                               | 2.00E-63 |
| 2558670458 | DRAFT_01126 | pfam00266      | Aminotran_5                                        | 1.90E-62 |
| 2558670458 | DRAFT_01126 | Locus_type     | CDS                                                |          |
| 2558670458 | DRAFT_01126 | Product_name   | Selenocysteine lyase                               |          |
| 2558670458 | DRAFT_01126 | Scaffold       | DRAFT_contig_70_133_len_26431_read_count_520883.21 |          |
| 2558670458 | DRAFT_01126 | Coordinates    | 6801..7952(-)                                      |          |

|            |             |                |                                                                      |          |
|------------|-------------|----------------|----------------------------------------------------------------------|----------|
| 2558670458 | DRAFT_01126 | DNA_length     | 1152bp                                                               |          |
| 2558670458 | DRAFT_01126 | Protein_length | 383aa                                                                |          |
| 2558670458 | DRAFT_01126 | GC             |                                                                      | 0.53     |
|            |             |                |                                                                      |          |
| 2558670459 | DRAFT_01127 | Locus_type     | CDS                                                                  |          |
| 2558670459 | DRAFT_01127 | Product_name   | hypothetical protein                                                 |          |
| 2558670459 | DRAFT_01127 | Scaffold       | DRAFT_contig_70_133_len_26431_read_count_520883.21                   |          |
| 2558670459 | DRAFT_01127 | Coordinates    | 8341..8583(-)                                                        |          |
| 2558670459 | DRAFT_01127 | DNA_length     | 243bp                                                                |          |
| 2558670459 | DRAFT_01127 | Protein_length | 80aa                                                                 |          |
| 2558670459 | DRAFT_01127 | GC             |                                                                      | 0.53     |
|            |             |                |                                                                      |          |
| 2558670460 | DRAFT_01128 | COG_category   | [S] Function unknown                                                 |          |
| 2558670460 | DRAFT_01128 | COG1833        | Uncharacterized conserved protein                                    | 2.00E-16 |
| 2558670460 | DRAFT_01128 | pfam01986      | DUF123                                                               | 1.20E-18 |
| 2558670460 | DRAFT_01128 | Locus_type     | CDS                                                                  |          |
| 2558670460 | DRAFT_01128 | Product_name   | Uncharacterized conserved protein                                    |          |
| 2558670460 | DRAFT_01128 | Scaffold       | DRAFT_contig_70_133_len_26431_read_count_520883.21                   |          |
| 2558670460 | DRAFT_01128 | Coordinates    | 8614..8943(-)                                                        |          |
| 2558670460 | DRAFT_01128 | DNA_length     | 330bp                                                                |          |
| 2558670460 | DRAFT_01128 | Protein_length | 109aa                                                                |          |
| 2558670460 | DRAFT_01128 | GC             |                                                                      | 0.57     |
|            |             |                |                                                                      |          |
| 2558670461 | DRAFT_01129 | pfam00096      | zf-C2H2                                                              | 1.40E-03 |
| 2558670461 | DRAFT_01129 | Locus_type     | CDS                                                                  |          |
| 2558670461 | DRAFT_01129 | Product_name   | Zinc finger, C2H2 type                                               |          |
| 2558670461 | DRAFT_01129 | Scaffold       | DRAFT_contig_70_133_len_26431_read_count_520883.21                   |          |
| 2558670461 | DRAFT_01129 | Coordinates    | 9649..9963(-)                                                        |          |
| 2558670461 | DRAFT_01129 | DNA_length     | 315bp                                                                |          |
| 2558670461 | DRAFT_01129 | Protein_length | 104aa                                                                |          |
| 2558670461 | DRAFT_01129 | GC             |                                                                      | 0.58     |
|            |             |                |                                                                      |          |
| 2558670462 | DRAFT_01130 | KEGG_module    | M00018: Threonine biosynthesis, aspartate => homoserine => threonine |          |
| 2558670462 | DRAFT_01130 | Metacyc        | HOMOSER-THRESYN-PWY: threonine biosynthesis from homoserine          |          |

|            |             |                |                                                    |          |
|------------|-------------|----------------|----------------------------------------------------|----------|
| 2558670462 | DRAFT_01130 | IMG_pathway    | 133: L-threonine synthesis from L-homoserine       |          |
| 2558670462 | DRAFT_01130 | COG_category   | [E] Amino acid transport and metabolism            |          |
| 2558670462 | DRAFT_01130 | COG0498        | Threonine synthase                                 | 8.00E-53 |
| 2558670462 | DRAFT_01130 | pfam00291      | PALP                                               | 4.90E-50 |
| 2558670462 | DRAFT_01130 | EC:4.2.3.1     | Threonine synthase.                                |          |
| 2558670462 | DRAFT_01130 | TIGR00260      | threonine synthase                                 | 3.40E-44 |
| 2558670462 | DRAFT_01130 | KO:K01733      | threonine synthase [EC:4.2.3.1]                    | 0.00E+00 |
| 2558670462 | DRAFT_01130 | ITERM:00220    | L-threonine synthase (EC 4.2.3.1)                  |          |
| 2558670462 | DRAFT_01130 | Locus_type     | CDS                                                |          |
| 2558670462 | DRAFT_01130 | Product_name   | L-threonine synthase (EC 4.2.3.1)                  |          |
| 2558670462 | DRAFT_01130 | Scaffold       | DRAFT_contig_70_133_len_26431_read_count_520883.21 |          |
| 2558670462 | DRAFT_01130 | Coordinates    | 10216..11274(+)                                    |          |
| 2558670462 | DRAFT_01130 | DNA_length     | 1059bp                                             |          |
| 2558670462 | DRAFT_01130 | Protein_length | 352aa                                              |          |
| 2558670462 | DRAFT_01130 | GC             |                                                    | 0.53     |
|            |             |                |                                                    |          |
| 2558670463 | DRAFT_01131 | Locus_type     | CDS                                                |          |
| 2558670463 | DRAFT_01131 | Product_name   | hypothetical protein                               |          |
| 2558670463 | DRAFT_01131 | Scaffold       | DRAFT_contig_70_133_len_26431_read_count_520883.21 |          |
| 2558670463 | DRAFT_01131 | Coordinates    | 11366..11560(+)                                    |          |
| 2558670463 | DRAFT_01131 | DNA_length     | 195bp                                              |          |
| 2558670463 | DRAFT_01131 | Protein_length | 64aa                                               |          |
| 2558670463 | DRAFT_01131 | GC             |                                                    | 0.53     |
|            |             |                |                                                    |          |
| 2558670464 | DRAFT_01132 | Locus_type     | CDS                                                |          |
| 2558670464 | DRAFT_01132 | Product_name   | hypothetical protein                               |          |
| 2558670464 | DRAFT_01132 | Scaffold       | DRAFT_contig_70_133_len_26431_read_count_520883.21 |          |
| 2558670464 | DRAFT_01132 | Coordinates    | 11657..12007(+)                                    |          |
| 2558670464 | DRAFT_01132 | DNA_length     | 351bp                                              |          |
| 2558670464 | DRAFT_01132 | Protein_length | 116aa                                              |          |
| 2558670464 | DRAFT_01132 | GC             |                                                    | 0.54     |
|            |             |                |                                                    |          |
| 2558670465 | DRAFT_01133 | Locus_type     | CDS                                                |          |
| 2558670465 | DRAFT_01133 | Product_name   | hypothetical protein                               |          |



|            |             |                |                                                              |                                                              |           |
|------------|-------------|----------------|--------------------------------------------------------------|--------------------------------------------------------------|-----------|
| 2558670465 | DRAFT_01133 | Scaffold       |                                                              | DRAFT_contig_70_133_len_26431_read_count_520883.21           |           |
| 2558670465 | DRAFT_01133 | Coordinates    |                                                              | 11994..12311(+)                                              |           |
| 2558670465 | DRAFT_01133 | DNA_length     |                                                              | 318bp                                                        |           |
| 2558670465 | DRAFT_01133 | Protein_length |                                                              | 105aa                                                        |           |
| 2558670465 | DRAFT_01133 | GC             |                                                              |                                                              | 0.52      |
|            |             |                |                                                              |                                                              |           |
| 2558670466 | DRAFT_01134 | Locus_type     |                                                              | CDS                                                          |           |
| 2558670466 | DRAFT_01134 | Product_name   |                                                              | hypothetical protein                                         |           |
| 2558670466 | DRAFT_01134 | Scaffold       |                                                              | DRAFT_contig_70_133_len_26431_read_count_520883.21           |           |
| 2558670466 | DRAFT_01134 | Coordinates    |                                                              | 12318..12836(+)                                              |           |
| 2558670466 | DRAFT_01134 | DNA_length     |                                                              | 519bp                                                        |           |
| 2558670466 | DRAFT_01134 | Protein_length |                                                              | 172aa                                                        |           |
| 2558670466 | DRAFT_01134 | GC             |                                                              |                                                              | 0.56      |
|            |             |                |                                                              |                                                              |           |
| 2558670467 | DRAFT_01135 | COG_category   | [R] General function prediction only                         |                                                              |           |
| 2558670467 | DRAFT_01135 | COG0535        | Predicted Fe-S oxidoreductases                               |                                                              | 1.00E-21  |
| 2558670467 | DRAFT_01135 | pfam04055      | Radical_SAM                                                  |                                                              | 2.40E-09  |
| 2558670467 | DRAFT_01135 | pfam13353      | Fer4_12                                                      |                                                              | 5.70E-06  |
| 2558670467 | DRAFT_01135 | TIGR04085      | radical SAM additional 4Fe4S-binding SPASM domain            |                                                              | 1.20E-10  |
| 2558670467 | DRAFT_01135 | TIGR04084      | putative peptide-modifying radical SAM enzyme, AF0577 family |                                                              | 4.40E-101 |
| 2558670467 | DRAFT_01135 | Locus_type     |                                                              | CDS                                                          |           |
| 2558670467 | DRAFT_01135 | Product_name   |                                                              | putative peptide-modifying radical SAM enzyme, AF0577 family |           |
| 2558670467 | DRAFT_01135 | Scaffold       |                                                              | DRAFT_contig_70_133_len_26431_read_count_520883.21           |           |
| 2558670467 | DRAFT_01135 | Coordinates    |                                                              | 12978..14060(-)                                              |           |
| 2558670467 | DRAFT_01135 | DNA_length     |                                                              | 1083bp                                                       |           |
| 2558670467 | DRAFT_01135 | Protein_length |                                                              | 360aa                                                        |           |
| 2558670467 | DRAFT_01135 | GC             |                                                              |                                                              | 0.53      |
|            |             |                |                                                              |                                                              |           |
| 2558670468 | DRAFT_01136 | pfam13463      | HTH_27                                                       |                                                              | 4.20E-06  |
| 2558670468 | DRAFT_01136 | Locus_type     |                                                              | CDS                                                          |           |
| 2558670468 | DRAFT_01136 | Product_name   |                                                              | Winged helix DNA-binding domain                              |           |
| 2558670468 | DRAFT_01136 | Scaffold       |                                                              | DRAFT_contig_70_133_len_26431_read_count_520883.21           |           |
| 2558670468 | DRAFT_01136 | Coordinates    |                                                              | 14218..14490(+)                                              |           |
| 2558670468 | DRAFT_01136 | DNA_length     |                                                              | 273bp                                                        |           |

|            |             |                |                                                                             |          |
|------------|-------------|----------------|-----------------------------------------------------------------------------|----------|
| 2558670468 | DRAFT_01136 | Protein_length | 90aa                                                                        |          |
| 2558670468 | DRAFT_01136 | GC             |                                                                             | 0.54     |
| 2558670469 | DRAFT_01137 | Locus_type     | CDS                                                                         |          |
| 2558670469 | DRAFT_01137 | Product_name   | hypothetical protein                                                        |          |
| 2558670469 | DRAFT_01137 | Scaffold       | DRAFT_contig_70_133_len_26431_read_count_520883.21                          |          |
| 2558670469 | DRAFT_01137 | Coordinates    | 14451..14582(-)                                                             |          |
| 2558670469 | DRAFT_01137 | DNA_length     | 132bp                                                                       |          |
| 2558670469 | DRAFT_01137 | Protein_length | 43aa                                                                        |          |
| 2558670469 | DRAFT_01137 | GC             |                                                                             | 0.57     |
| 2558670470 | DRAFT_01138 | COG_category   | [K] Transcription                                                           |          |
| 2558670470 | DRAFT_01138 | COG1405        | Transcription initiation factor TFIIB, Brf1 subunit/Transcription initiatic | 1.00E-68 |
| 2558670470 | DRAFT_01138 | pfam00382      | TFIIB                                                                       | 2.50E-19 |
| 2558670470 | DRAFT_01138 | pfam08271      | TF_Zn_Ribbon                                                                | 7.20E-11 |
| 2558670470 | DRAFT_01138 | pfam00382      | TFIIB                                                                       | 2.70E-14 |
| 2558670470 | DRAFT_01138 | KO:K03124      | transcription initiation factor TFIIB                                       | 0.00E+00 |
| 2558670470 | DRAFT_01138 | Locus_type     | CDS                                                                         |          |
| 2558670470 | DRAFT_01138 | Product_name   | Transcription initiation factor IIB (TFIIB)                                 |          |
| 2558670470 | DRAFT_01138 | Scaffold       | DRAFT_contig_70_133_len_26431_read_count_520883.21                          |          |
| 2558670470 | DRAFT_01138 | Coordinates    | 15175..16113(-)                                                             |          |
| 2558670470 | DRAFT_01138 | DNA_length     | 939bp                                                                       |          |
| 2558670470 | DRAFT_01138 | Protein_length | 312aa                                                                       |          |
| 2558670470 | DRAFT_01138 | GC             |                                                                             | 0.6      |
| 2558670471 | DRAFT_01139 | COG_category   | [L] Replication, recombination and repair                                   |          |
| 2558670471 | DRAFT_01139 | COG3316        | Transposase and inactivated derivatives                                     | 2.00E-09 |
| 2558670471 | DRAFT_01139 | pfam13610      | DDE_Tnp_IS240                                                               | 4.20E-19 |
| 2558670471 | DRAFT_01139 | Locus_type     | CDS                                                                         |          |
| 2558670471 | DRAFT_01139 | Product_name   | Transposase and inactivated derivatives                                     |          |
| 2558670471 | DRAFT_01139 | Scaffold       | DRAFT_contig_70_133_len_26431_read_count_520883.21                          |          |
| 2558670471 | DRAFT_01139 | Coordinates    | 16209..17363(-)                                                             |          |
| 2558670471 | DRAFT_01139 | DNA_length     | 1155bp                                                                      |          |
| 2558670471 | DRAFT_01139 | Protein_length | 384aa                                                                       |          |

|            |             |                |                                                                       |          |
|------------|-------------|----------------|-----------------------------------------------------------------------|----------|
| 2558670471 | DRAFT_01139 | GC             |                                                                       | 0.54     |
| 2558670472 | DRAFT_01140 | Locus_type     | CDS                                                                   |          |
| 2558670472 | DRAFT_01140 | Product_name   | hypothetical protein                                                  |          |
| 2558670472 | DRAFT_01140 | Scaffold       | DRAFT_contig_70_133_len_26431_read_count_520883.21                    |          |
| 2558670472 | DRAFT_01140 | Coordinates    | 17501..17764(+)                                                       |          |
| 2558670472 | DRAFT_01140 | DNA_length     | 264bp                                                                 |          |
| 2558670472 | DRAFT_01140 | Protein_length | 87aa                                                                  |          |
| 2558670472 | DRAFT_01140 | GC             |                                                                       | 0.52     |
| 2558670473 | DRAFT_01141 | Locus_type     | CDS                                                                   |          |
| 2558670473 | DRAFT_01141 | Product_name   | hypothetical protein                                                  |          |
| 2558670473 | DRAFT_01141 | Scaffold       | DRAFT_contig_70_133_len_26431_read_count_520883.21                    |          |
| 2558670473 | DRAFT_01141 | Coordinates    | 17757..18410(+)                                                       |          |
| 2558670473 | DRAFT_01141 | DNA_length     | 654bp                                                                 |          |
| 2558670473 | DRAFT_01141 | Protein_length | 217aa                                                                 |          |
| 2558670473 | DRAFT_01141 | GC             |                                                                       | 0.53     |
| 2558670474 | DRAFT_01142 | Locus_type     | CDS                                                                   |          |
| 2558670474 | DRAFT_01142 | Product_name   | hypothetical protein                                                  |          |
| 2558670474 | DRAFT_01142 | Scaffold       | DRAFT_contig_70_133_len_26431_read_count_520883.21                    |          |
| 2558670474 | DRAFT_01142 | Coordinates    | 18416..18775(+)                                                       |          |
| 2558670474 | DRAFT_01142 | DNA_length     | 360bp                                                                 |          |
| 2558670474 | DRAFT_01142 | Protein_length | 119aa                                                                 |          |
| 2558670474 | DRAFT_01142 | GC             |                                                                       | 0.53     |
| 2558670475 | DRAFT_01143 | COG_category   | [H] Coenzyme transport and metabolism                                 |          |
| 2558670475 | DRAFT_01143 | COG0476        | Dinucleotide-utilizing enzymes involved in molybdopterin and thiamine | 2.00E-68 |
| 2558670475 | DRAFT_01143 | pfam05237      | MoeZ_MoeB                                                             | 2.20E-29 |
| 2558670475 | DRAFT_01143 | pfam00899      | ThiF                                                                  | 9.00E-43 |
| 2558670475 | DRAFT_01143 | pfam00581      | Rhodanese                                                             | 6.90E-19 |
| 2558670475 | DRAFT_01143 | KO:K11996      | adenylyltransferase and sulfurtransferase                             | 0.00E+00 |
| 2558670475 | DRAFT_01143 | Locus_type     | CDS                                                                   |          |
| 2558670475 | DRAFT_01143 | Product_name   | Dinucleotide-utilizing enzymes involved in molybdopterin and thiamir  |          |

|            |             |                |                                                         |          |
|------------|-------------|----------------|---------------------------------------------------------|----------|
| 2558670475 | DRAFT_01143 | Scaffold       | DRAFT_contig_70_133_len_26431_read_count_520883.21      |          |
| 2558670475 | DRAFT_01143 | Coordinates    | 19290..20438(-)                                         |          |
| 2558670475 | DRAFT_01143 | DNA_length     | 1149bp                                                  |          |
| 2558670475 | DRAFT_01143 | Protein_length | 382aa                                                   |          |
| 2558670475 | DRAFT_01143 | GC             |                                                         | 0.62     |
| 2558670475 | DRAFT_01143 | Fused_gene     | Yes                                                     |          |
| 2558670476 | DRAFT_01144 | KEGG_module    | M00254: ABC-2 type transport system                     |          |
| 2558670476 | DRAFT_01144 | COG_category   | [V] Defense mechanisms                                  |          |
| 2558670476 | DRAFT_01144 | COG1131        | ABC-type multidrug transport system, ATPase component   | 6.00E-59 |
| 2558670476 | DRAFT_01144 | pfam00005      | ABC_tran                                                | 5.80E-24 |
| 2558670476 | DRAFT_01144 | KO:K01990      | ABC-2 type transport system ATP-binding protein         | 0.00E+00 |
| 2558670476 | DRAFT_01144 | Locus_type     | CDS                                                     |          |
| 2558670476 | DRAFT_01144 | Product_name   | ABC-type multidrug transport system, ATPase component   |          |
| 2558670476 | DRAFT_01144 | Scaffold       | DRAFT_contig_70_133_len_26431_read_count_520883.21      |          |
| 2558670476 | DRAFT_01144 | Coordinates    | 20548..21516(+)                                         |          |
| 2558670476 | DRAFT_01144 | DNA_length     | 969bp                                                   |          |
| 2558670476 | DRAFT_01144 | Protein_length | 322aa                                                   |          |
| 2558670476 | DRAFT_01144 | GC             |                                                         | 0.61     |
| 2558670477 | DRAFT_01145 | KEGG_module    | M00248: Putative antibiotic transport system            |          |
| 2558670477 | DRAFT_01145 | COG_category   | [V] Defense mechanisms                                  |          |
| 2558670477 | DRAFT_01145 | COG0842        | ABC-type multidrug transport system, permease component | 1.00E-06 |
| 2558670477 | DRAFT_01145 | pfam01061      | ABC2_membrane                                           | 1.50E-13 |
| 2558670477 | DRAFT_01145 | KO:K09686      | antibiotic transport system permease protein            | 8.80E-32 |
| 2558670477 | DRAFT_01145 | Locus_type     | CDS                                                     |          |
| 2558670477 | DRAFT_01145 | Product_name   | ABC-type multidrug transport system, permease component |          |
| 2558670477 | DRAFT_01145 | Scaffold       | DRAFT_contig_70_133_len_26431_read_count_520883.21      |          |
| 2558670477 | DRAFT_01145 | Coordinates    | 21513..22277(+)                                         |          |
| 2558670477 | DRAFT_01145 | DNA_length     | 765bp                                                   |          |
| 2558670477 | DRAFT_01145 | Protein_length | 254aa                                                   |          |
| 2558670477 | DRAFT_01145 | GC             |                                                         | 0.6      |
| 2558670477 | DRAFT_01145 | Transmembrane  | Yes                                                     |          |

|            |             |                |                                                                  |          |
|------------|-------------|----------------|------------------------------------------------------------------|----------|
| 2558670478 | DRAFT_01146 | Locus_type     | CDS                                                              |          |
| 2558670478 | DRAFT_01146 | Product_name   | hypothetical protein                                             |          |
| 2558670478 | DRAFT_01146 | Scaffold       | DRAFT_contig_70_133_len_26431_read_count_520883.21               |          |
| 2558670478 | DRAFT_01146 | Coordinates    | 22274..22468(+)                                                  |          |
| 2558670478 | DRAFT_01146 | DNA_length     | 195bp                                                            |          |
| 2558670478 | DRAFT_01146 | Protein_length | 64aa                                                             |          |
| 2558670478 | DRAFT_01146 | GC             |                                                                  | 0.67     |
|            |             |                |                                                                  |          |
| 2558670479 | DRAFT_01147 | COG_category   | [O] Posttranslational modification, protein turnover, chaperones |          |
| 2558670479 | DRAFT_01147 | COG1225        | Peroxiredoxin                                                    | 1.00E-35 |
| 2558670479 | DRAFT_01147 | pfam00578      | AhpC-TSA                                                         | 3.80E-33 |
| 2558670479 | DRAFT_01147 | Locus_type     | CDS                                                              |          |
| 2558670479 | DRAFT_01147 | Product_name   | Peroxiredoxin                                                    |          |
| 2558670479 | DRAFT_01147 | Scaffold       | DRAFT_contig_70_133_len_26431_read_count_520883.21               |          |
| 2558670479 | DRAFT_01147 | Coordinates    | 22504..22971(+)                                                  |          |
| 2558670479 | DRAFT_01147 | DNA_length     | 468bp                                                            |          |
| 2558670479 | DRAFT_01147 | Protein_length | 155aa                                                            |          |
| 2558670479 | DRAFT_01147 | GC             |                                                                  | 0.59     |
|            |             |                |                                                                  |          |
| 2558670480 | DRAFT_01148 | pfam10604      | Polyketide_cyc2                                                  | 4.70E-12 |
| 2558670480 | DRAFT_01148 | Locus_type     | CDS                                                              |          |
| 2558670480 | DRAFT_01148 | Product_name   | Polyketide cyclase / dehydrase and lipid transport               |          |
| 2558670480 | DRAFT_01148 | Scaffold       | DRAFT_contig_70_133_len_26431_read_count_520883.21               |          |
| 2558670480 | DRAFT_01148 | Coordinates    | 23278..23706(-)                                                  |          |
| 2558670480 | DRAFT_01148 | DNA_length     | 429bp                                                            |          |
| 2558670480 | DRAFT_01148 | Protein_length | 142aa                                                            |          |
| 2558670480 | DRAFT_01148 | GC             |                                                                  | 0.6      |
|            |             |                |                                                                  |          |
| 2558670481 | DRAFT_01149 | Locus_type     | CDS                                                              |          |
| 2558670481 | DRAFT_01149 | Product_name   | hypothetical protein                                             |          |
| 2558670481 | DRAFT_01149 | Scaffold       | DRAFT_contig_70_133_len_26431_read_count_520883.21               |          |
| 2558670481 | DRAFT_01149 | Coordinates    | 23766..24773(-)                                                  |          |
| 2558670481 | DRAFT_01149 | DNA_length     | 1008bp                                                           |          |
| 2558670481 | DRAFT_01149 | Protein_length | 335aa                                                            |          |

|            |             |                |                                                                    |          |
|------------|-------------|----------------|--------------------------------------------------------------------|----------|
| 2558670481 | DRAFT_01149 | GC             |                                                                    | 0.58     |
| 2558670481 | DRAFT_01149 | Transmembrane  | Yes                                                                |          |
| 2558670482 | DRAFT_01150 | COG_category   | [Q] Secondary metabolites biosynthesis, transport and catabolism   |          |
| 2558670482 | DRAFT_01150 | COG0179        | 2-keto-4-pentenoate hydratase/2-oxohepta-3-ene-1,7-dioic acid hydr | 6.00E-73 |
| 2558670482 | DRAFT_01150 | pfam01557      | FAA_hydrolase                                                      | 3.60E-67 |
| 2558670482 | DRAFT_01150 | Locus_type     | CDS                                                                |          |
| 2558670482 | DRAFT_01150 | Product_name   | 2-keto-4-pentenoate hydratase/2-oxohepta-3-ene-1,7-dioic acid hydr |          |
| 2558670482 | DRAFT_01150 | Scaffold       | DRAFT_contig_70_133_len_26431_read_count_520883.21                 |          |
| 2558670482 | DRAFT_01150 | Coordinates    | 24838..25707(-)                                                    |          |
| 2558670482 | DRAFT_01150 | DNA_length     | 870bp                                                              |          |
| 2558670482 | DRAFT_01150 | Protein_length | 289aa                                                              |          |
| 2558670482 | DRAFT_01150 | GC             |                                                                    | 0.56     |
| 2558670483 | DRAFT_01151 | ITERM:02472    | TspO and MBR related proteins                                      |          |
| 2558670483 | DRAFT_01151 | Locus_type     | CDS                                                                |          |
| 2558670483 | DRAFT_01151 | Product_name   | TspO and MBR related proteins                                      |          |
| 2558670483 | DRAFT_01151 | Scaffold       | DRAFT_contig_70_133_len_26431_read_count_520883.21                 |          |
| 2558670483 | DRAFT_01151 | Coordinates    | 25747..26430(-)                                                    |          |
| 2558670483 | DRAFT_01151 | DNA_length     | 684bp                                                              |          |
| 2558670483 | DRAFT_01151 | Protein_length | 227aa                                                              |          |
| 2558670483 | DRAFT_01151 | GC             |                                                                    | 0.51     |
| 2558670483 | DRAFT_01151 | Transmembrane  | Yes                                                                |          |
| 2558670484 | DRAFT_01152 | KEGG_module    | M00248: Putative antibiotic transport system                       |          |
| 2558670484 | DRAFT_01152 | pfam01061      | ABC2_membrane                                                      | 2.90E-26 |
| 2558670484 | DRAFT_01152 | KO:K09686      | antibiotic transport system permease protein                       | 7.40E-27 |
| 2558670484 | DRAFT_01152 | Locus_type     | CDS                                                                |          |
| 2558670484 | DRAFT_01152 | Product_name   | Predicted membrane protein                                         |          |
| 2558670484 | DRAFT_01152 | Scaffold       | DRAFT_contig_70_136_len_25737_read_count_476203.22                 |          |
| 2558670484 | DRAFT_01152 | Coordinates    | 9..671(-)                                                          |          |
| 2558670484 | DRAFT_01152 | DNA_length     | 663bp                                                              |          |
| 2558670484 | DRAFT_01152 | Protein_length | 220aa                                                              |          |
| 2558670484 | DRAFT_01152 | GC             |                                                                    | 0.6      |

|            |             |                |                                                                      |          |
|------------|-------------|----------------|----------------------------------------------------------------------|----------|
| 2558670484 | DRAFT_01152 | Transmembrane  | Yes                                                                  |          |
| 2558670485 | DRAFT_01153 | KEGG_module    | M00248: Putative antibiotic transport system                         |          |
| 2558670485 | DRAFT_01153 | COG_category   | [V] Defense mechanisms                                               |          |
| 2558670485 | DRAFT_01153 | COG1131        | ABC-type multidrug transport system, ATPase component                | 1.00E-59 |
| 2558670485 | DRAFT_01153 | pfam00005      | ABC_tran                                                             | 2.90E-24 |
| 2558670485 | DRAFT_01153 | KO:K09687      | antibiotic transport system ATP-binding protein                      | 0.00E+00 |
| 2558670485 | DRAFT_01153 | Locus_type     | CDS                                                                  |          |
| 2558670485 | DRAFT_01153 | Product_name   | ABC-type multidrug transport system, ATPase component                |          |
| 2558670485 | DRAFT_01153 | Scaffold       | DRAFT_contig_70_136_len_25737_read_count_476203.22                   |          |
| 2558670485 | DRAFT_01153 | Coordinates    | 752..1681(-)                                                         |          |
| 2558670485 | DRAFT_01153 | DNA_length     | 930bp                                                                |          |
| 2558670485 | DRAFT_01153 | Protein_length | 309aa                                                                |          |
| 2558670485 | DRAFT_01153 | GC             |                                                                      | 0.56     |
| 2558670486 | DRAFT_01154 | pfam00571      | CBS                                                                  | 2.90E-09 |
| 2558670486 | DRAFT_01154 | pfam00571      | CBS                                                                  | 7.30E-18 |
| 2558670486 | DRAFT_01154 | Locus_type     | CDS                                                                  |          |
| 2558670486 | DRAFT_01154 | Product_name   | Predicted signal-transduction protein containing cAMP-binding and CI |          |
| 2558670486 | DRAFT_01154 | Scaffold       | DRAFT_contig_70_136_len_25737_read_count_476203.22                   |          |
| 2558670486 | DRAFT_01154 | Coordinates    | 1736..2200(+)                                                        |          |
| 2558670486 | DRAFT_01154 | DNA_length     | 465bp                                                                |          |
| 2558670486 | DRAFT_01154 | Protein_length | 154aa                                                                |          |
| 2558670486 | DRAFT_01154 | GC             |                                                                      | 0.55     |
| 2558670487 | DRAFT_01155 | COG_category   | [O] Posttranslational modification, protein turnover, chaperones     |          |
| 2558670487 | DRAFT_01155 | COG0071        | Molecular chaperone (small heat shock protein)                       | 6.00E-14 |
| 2558670487 | DRAFT_01155 | pfam00011      | HSP20                                                                | 9.70E-08 |
| 2558670487 | DRAFT_01155 | KO:K13993      | HSP20 family protein                                                 | 8.70E-43 |
| 2558670487 | DRAFT_01155 | Locus_type     | CDS                                                                  |          |
| 2558670487 | DRAFT_01155 | Product_name   | Molecular chaperone (small heat shock protein)                       |          |
| 2558670487 | DRAFT_01155 | Scaffold       | DRAFT_contig_70_136_len_25737_read_count_476203.22                   |          |
| 2558670487 | DRAFT_01155 | Coordinates    | 2202..2798(-)                                                        |          |
| 2558670487 | DRAFT_01155 | DNA_length     | 597bp                                                                |          |

|            |             |                |                                                                                  |          |
|------------|-------------|----------------|----------------------------------------------------------------------------------|----------|
| 2558670487 | DRAFT_01155 | Protein_length | 198aa                                                                            |          |
| 2558670487 | DRAFT_01155 | GC             |                                                                                  | 0.56     |
| 2558670488 | DRAFT_01156 | COG_category   | [O] Posttranslational modification, protein turnover, chaperones                 |          |
| 2558670488 | DRAFT_01156 | COG0501        | Zn-dependent protease with chaperone function                                    | 7.00E-40 |
| 2558670488 | DRAFT_01156 | pfam01435      | Peptidase_M48                                                                    | 1.90E-39 |
| 2558670488 | DRAFT_01156 | EC:3.4.24.-    | Hydrolases. Acting on peptide bonds (peptide hydrolases). Metalloendopeptidases. |          |
| 2558670488 | DRAFT_01156 | KO:K03799      | heat shock protein HtpX [EC:3.4.24.-]                                            | 0.00E+00 |
| 2558670488 | DRAFT_01156 | Locus_type     | CDS                                                                              |          |
| 2558670488 | DRAFT_01156 | Product_name   | Zn-dependent protease with chaperone function                                    |          |
| 2558670488 | DRAFT_01156 | Scaffold       | DRAFT_contig_70_136_len_25737_read_count_476203.22                               |          |
| 2558670488 | DRAFT_01156 | Coordinates    | 2903..3802(+)                                                                    |          |
| 2558670488 | DRAFT_01156 | DNA_length     | 900bp                                                                            |          |
| 2558670488 | DRAFT_01156 | Protein_length | 299aa                                                                            |          |
| 2558670488 | DRAFT_01156 | GC             |                                                                                  | 0.57     |
| 2558670488 | DRAFT_01156 | Transmembrane  | Yes                                                                              |          |
| 2558670489 | DRAFT_01157 | Locus_type     | CDS                                                                              |          |
| 2558670489 | DRAFT_01157 | Product_name   | hypothetical protein                                                             |          |
| 2558670489 | DRAFT_01157 | Scaffold       | DRAFT_contig_70_136_len_25737_read_count_476203.22                               |          |
| 2558670489 | DRAFT_01157 | Coordinates    | 3799..4296(-)                                                                    |          |
| 2558670489 | DRAFT_01157 | DNA_length     | 498bp                                                                            |          |
| 2558670489 | DRAFT_01157 | Protein_length | 165aa                                                                            |          |
| 2558670489 | DRAFT_01157 | GC             |                                                                                  | 0.57     |
| 2558670489 | DRAFT_01157 | Transmembrane  | Yes                                                                              |          |
| 2558670490 | DRAFT_01158 | COG_category   | [L] Replication, recombination and repair                                        |          |
| 2558670490 | DRAFT_01158 | COG4912        | Predicted DNA alkylation repair enzyme                                           | 1.00E-08 |
| 2558670490 | DRAFT_01158 | pfam08713      | DNA_alkylation                                                                   | 1.40E-37 |
| 2558670490 | DRAFT_01158 | Locus_type     | CDS                                                                              |          |
| 2558670490 | DRAFT_01158 | Product_name   | Predicted DNA alkylation repair enzyme                                           |          |
| 2558670490 | DRAFT_01158 | Scaffold       | DRAFT_contig_70_136_len_25737_read_count_476203.22                               |          |
| 2558670490 | DRAFT_01158 | Coordinates    | 4550..5263(-)                                                                    |          |
| 2558670490 | DRAFT_01158 | DNA_length     | 714bp                                                                            |          |



|            |             |                |                                           |                                                    |          |
|------------|-------------|----------------|-------------------------------------------|----------------------------------------------------|----------|
| 2558670490 | DRAFT_01158 | Protein_length |                                           | 237aa                                              |          |
| 2558670490 | DRAFT_01158 | GC             |                                           |                                                    | 0.54     |
| 2558670491 | DRAFT_01159 | pfam02589      | DUF162                                    |                                                    | 5.70E-18 |
| 2558670491 | DRAFT_01159 | Locus_type     |                                           | CDS                                                |          |
| 2558670491 | DRAFT_01159 | Product_name   |                                           | Uncharacterised ACR, YkgG family COG1556           |          |
| 2558670491 | DRAFT_01159 | Scaffold       |                                           | DRAFT_contig_70_136_len_25737_read_count_476203.22 |          |
| 2558670491 | DRAFT_01159 | Coordinates    |                                           | 5413..6090(-)                                      |          |
| 2558670491 | DRAFT_01159 | DNA_length     |                                           | 678bp                                              |          |
| 2558670491 | DRAFT_01159 | Protein_length |                                           | 225aa                                              |          |
| 2558670491 | DRAFT_01159 | GC             |                                           |                                                    | 0.61     |
| 2558670492 | DRAFT_01160 | COG_category   | [G] Carbohydrate transport and metabolism |                                                    |          |
| 2558670492 | DRAFT_01160 | COG0662        | Mannose-6-phosphate isomerase             |                                                    | 7.00E-17 |
| 2558670492 | DRAFT_01160 | pfam07883      | Cupin_2                                   |                                                    | 3.90E-18 |
| 2558670492 | DRAFT_01160 | Locus_type     |                                           | CDS                                                |          |
| 2558670492 | DRAFT_01160 | Product_name   |                                           | Mannose-6-phosphate isomerase                      |          |
| 2558670492 | DRAFT_01160 | Scaffold       |                                           | DRAFT_contig_70_136_len_25737_read_count_476203.22 |          |
| 2558670492 | DRAFT_01160 | Coordinates    |                                           | 6353..6745(-)                                      |          |
| 2558670492 | DRAFT_01160 | DNA_length     |                                           | 393bp                                              |          |
| 2558670492 | DRAFT_01160 | Protein_length |                                           | 130aa                                              |          |
| 2558670492 | DRAFT_01160 | GC             |                                           |                                                    | 0.54     |
| 2558670493 | DRAFT_01161 | pfam07366      | SnoaL                                     |                                                    | 1.20E-27 |
| 2558670493 | DRAFT_01161 | Locus_type     |                                           | CDS                                                |          |
| 2558670493 | DRAFT_01161 | Product_name   |                                           | SnoaL-like polyketide cyclase                      |          |
| 2558670493 | DRAFT_01161 | Scaffold       |                                           | DRAFT_contig_70_136_len_25737_read_count_476203.22 |          |
| 2558670493 | DRAFT_01161 | Coordinates    |                                           | 6803..7258(+)                                      |          |
| 2558670493 | DRAFT_01161 | DNA_length     |                                           | 456bp                                              |          |
| 2558670493 | DRAFT_01161 | Protein_length |                                           | 151aa                                              |          |
| 2558670493 | DRAFT_01161 | GC             |                                           |                                                    | 0.53     |
| 2558670494 | DRAFT_01162 | COG_category   | [R] General function prediction only      |                                                    |          |
| 2558670494 | DRAFT_01162 | COG0517        | FOG: CBS domain                           |                                                    | 1.00E-11 |

|            |             |                |                                                    |          |
|------------|-------------|----------------|----------------------------------------------------|----------|
| 2558670494 | DRAFT_01162 | pfam00571      | CBS                                                | 2.40E-09 |
| 2558670494 | DRAFT_01162 | pfam00571      | CBS                                                | 2.60E-11 |
| 2558670494 | DRAFT_01162 | Locus_type     | CDS                                                |          |
| 2558670494 | DRAFT_01162 | Product_name   | FOG: CBS domain                                    |          |
| 2558670494 | DRAFT_01162 | Scaffold       | DRAFT_contig_70_136_len_25737_read_count_476203.22 |          |
| 2558670494 | DRAFT_01162 | Coordinates    | 7584..8186(-)                                      |          |
| 2558670494 | DRAFT_01162 | DNA_length     | 603bp                                              |          |
| 2558670494 | DRAFT_01162 | Protein_length | 200aa                                              |          |
| 2558670494 | DRAFT_01162 | GC             |                                                    | 0.57     |
| 2558670495 | DRAFT_01163 | Locus_type     | CDS                                                |          |
| 2558670495 | DRAFT_01163 | Product_name   | hypothetical protein                               |          |
| 2558670495 | DRAFT_01163 | Scaffold       | DRAFT_contig_70_136_len_25737_read_count_476203.22 |          |
| 2558670495 | DRAFT_01163 | Coordinates    | 8282..8536(+)                                      |          |
| 2558670495 | DRAFT_01163 | DNA_length     | 255bp                                              |          |
| 2558670495 | DRAFT_01163 | Protein_length | 84aa                                               |          |
| 2558670495 | DRAFT_01163 | GC             |                                                    | 0.53     |
| 2558670495 | DRAFT_01163 | Transmembrane  | Yes                                                |          |
| 2558670496 | DRAFT_01164 | Locus_type     | CDS                                                |          |
| 2558670496 | DRAFT_01164 | Product_name   | hypothetical protein                               |          |
| 2558670496 | DRAFT_01164 | Scaffold       | DRAFT_contig_70_136_len_25737_read_count_476203.22 |          |
| 2558670496 | DRAFT_01164 | Coordinates    | 8686..8892(-)                                      |          |
| 2558670496 | DRAFT_01164 | DNA_length     | 207bp                                              |          |
| 2558670496 | DRAFT_01164 | Protein_length | 68aa                                               |          |
| 2558670496 | DRAFT_01164 | GC             |                                                    | 0.43     |
| 2558670496 | DRAFT_01164 | Transmembrane  | Yes                                                |          |
| 2558670497 | DRAFT_01165 | COG_category   | [S] Function unknown                               |          |
| 2558670497 | DRAFT_01165 | COG1814        | Uncharacterized membrane protein                   | 2.00E-11 |
| 2558670497 | DRAFT_01165 | pfam01988      | VIT1                                               | 3.50E-41 |
| 2558670497 | DRAFT_01165 | Locus_type     | CDS                                                |          |
| 2558670497 | DRAFT_01165 | Product_name   | Uncharacterized membrane protein                   |          |
| 2558670497 | DRAFT_01165 | Scaffold       | DRAFT_contig_70_136_len_25737_read_count_476203.22 |          |

|            |             |                |                                                   |                                                           |          |
|------------|-------------|----------------|---------------------------------------------------|-----------------------------------------------------------|----------|
| 2558670497 | DRAFT_01165 | Coordinates    |                                                   | 9021..9737(+)                                             |          |
| 2558670497 | DRAFT_01165 | DNA_length     |                                                   | 717bp                                                     |          |
| 2558670497 | DRAFT_01165 | Protein_length |                                                   | 238aa                                                     |          |
| 2558670497 | DRAFT_01165 | GC             |                                                   |                                                           | 0.56     |
| 2558670497 | DRAFT_01165 | Transmembrane  |                                                   | Yes                                                       |          |
| 2558670498 | DRAFT_01166 | pfam08241      | Methyltransf_11                                   |                                                           | 4.80E-20 |
| 2558670498 | DRAFT_01166 | Locus_type     |                                                   | CDS                                                       |          |
| 2558670498 | DRAFT_01166 | Product_name   |                                                   | Methylase involved in ubiquinone/menaquinone biosynthesis |          |
| 2558670498 | DRAFT_01166 | Scaffold       |                                                   | DRAFT_contig_70_136_len_25737_read_count_476203.22        |          |
| 2558670498 | DRAFT_01166 | Coordinates    |                                                   | 9825..10424(+)                                            |          |
| 2558670498 | DRAFT_01166 | DNA_length     |                                                   | 600bp                                                     |          |
| 2558670498 | DRAFT_01166 | Protein_length |                                                   | 199aa                                                     |          |
| 2558670498 | DRAFT_01166 | GC             |                                                   |                                                           | 0.57     |
| 2558670499 | DRAFT_01167 | pfam06053      | DUF929                                            |                                                           | 1.70E-24 |
| 2558670499 | DRAFT_01167 | Locus_type     |                                                   | CDS                                                       |          |
| 2558670499 | DRAFT_01167 | Product_name   |                                                   | Domain of unknown function (DUF929)                       |          |
| 2558670499 | DRAFT_01167 | Scaffold       |                                                   | DRAFT_contig_70_136_len_25737_read_count_476203.22        |          |
| 2558670499 | DRAFT_01167 | Coordinates    |                                                   | 10663..11559(+)                                           |          |
| 2558670499 | DRAFT_01167 | DNA_length     |                                                   | 897bp                                                     |          |
| 2558670499 | DRAFT_01167 | Protein_length |                                                   | 298aa                                                     |          |
| 2558670499 | DRAFT_01167 | GC             |                                                   |                                                           | 0.56     |
| 2558670499 | DRAFT_01167 | Transmembrane  |                                                   | Yes                                                       |          |
| 2558670500 | DRAFT_01168 | KEGG_module    | M00021: Cysteine biosynthesis, serine => cysteine |                                                           |          |
| 2558670500 | DRAFT_01168 | Metacyc        | PWY-6936: seleno-amino acid biosynthesis          |                                                           |          |
| 2558670500 | DRAFT_01168 | Metacyc        | CYSTSYN-PWY: cysteine biosynthesis I              |                                                           |          |
| 2558670500 | DRAFT_01168 | COG_category   | [E] Amino acid transport and metabolism           |                                                           |          |
| 2558670500 | DRAFT_01168 | COG0031        | Cysteine synthase                                 |                                                           | 8.00E-78 |
| 2558670500 | DRAFT_01168 | pfam00291      | PALP                                              |                                                           | 1.80E-55 |
| 2558670500 | DRAFT_01168 | EC:2.5.1.47    | Cysteine synthase.                                |                                                           |          |
| 2558670500 | DRAFT_01168 | KO:K01738      | cysteine synthase A [EC:2.5.1.47]                 |                                                           | 0.00E+00 |
| 2558670500 | DRAFT_01168 | Locus_type     |                                                   | CDS                                                       |          |

|            |             |                |                                                                               |           |
|------------|-------------|----------------|-------------------------------------------------------------------------------|-----------|
| 2558670500 | DRAFT_01168 | Product_name   | Cysteine synthase                                                             |           |
| 2558670500 | DRAFT_01168 | Scaffold       | DRAFT_contig_70_136_len_25737_read_count_476203.22                            |           |
| 2558670500 | DRAFT_01168 | Coordinates    | 11560..12549(+)                                                               |           |
| 2558670500 | DRAFT_01168 | DNA_length     | 990bp                                                                         |           |
| 2558670500 | DRAFT_01168 | Protein_length | 329aa                                                                         |           |
| 2558670500 | DRAFT_01168 | GC             |                                                                               | 0.52      |
|            |             |                |                                                                               |           |
| 2558670501 | DRAFT_01169 | Locus_type     | tRNA                                                                          |           |
| 2558670501 | DRAFT_01169 | Product_name   | tRNA_Val_GAC                                                                  |           |
| 2558670501 | DRAFT_01169 | Scaffold       | DRAFT_contig_70_136_len_25737_read_count_476203.22                            |           |
| 2558670501 | DRAFT_01169 | Coordinates    | 12674..12773(-)                                                               |           |
| 2558670501 | DRAFT_01169 | DNA_length     | 77bp                                                                          |           |
| 2558670501 | DRAFT_01169 | GC             |                                                                               | 0.64      |
|            |             |                |                                                                               |           |
| 2558670502 | DRAFT_01170 | Metacyc        | PWY-5074: mevalonate degradation                                              |           |
| 2558670502 | DRAFT_01170 | IMG_pathway    | 178: Mevalonate pathway for isopentenyl pyrophosphate synthesis               |           |
| 2558670502 | DRAFT_01170 | IMG_pathway    | 591: Archaeal mevalonate pathway for isopentenyl pyrophosphate synthesis      |           |
| 2558670502 | DRAFT_01170 | COG_category   | [I] Lipid transport and metabolism                                            |           |
| 2558670502 | DRAFT_01170 | COG1257        | Hydroxymethylglutaryl-CoA reductase                                           | 2.00E-104 |
| 2558670502 | DRAFT_01170 | pfam00368      | HMG-CoA_red                                                                   | 6.50E-92  |
| 2558670502 | DRAFT_01170 | EC:1.1.1.88    | Hydroxymethylglutaryl-CoA reductase.                                          |           |
| 2558670502 | DRAFT_01170 | TIGR00532      | hydroxymethylglutaryl-CoA reductase, degradative                              | 0.00E+00  |
| 2558670502 | DRAFT_01170 | KO:K00054      | hydroxymethylglutaryl-CoA reductase [EC:1.1.1.88]                             | 0.00E+00  |
| 2558670502 | DRAFT_01170 | ITERM:00463    | 3-hydroxy-3-methylglutaryl-coenzyme A reductase (EC 1.1.1.34)                 |           |
| 2558670502 | DRAFT_01170 | Locus_type     | CDS                                                                           |           |
| 2558670502 | DRAFT_01170 | Product_name   | 3-hydroxy-3-methylglutaryl-coenzyme A reductase (EC 1.1.1.34)                 |           |
| 2558670502 | DRAFT_01170 | Scaffold       | DRAFT_contig_70_136_len_25737_read_count_476203.22                            |           |
| 2558670502 | DRAFT_01170 | Coordinates    | 12903..14192(+)                                                               |           |
| 2558670502 | DRAFT_01170 | DNA_length     | 1290bp                                                                        |           |
| 2558670502 | DRAFT_01170 | Protein_length | 429aa                                                                         |           |
| 2558670502 | DRAFT_01170 | GC             |                                                                               | 0.58      |
|            |             |                |                                                                               |           |
| 2558670503 | DRAFT_01171 | KEGG_module    | M00045: Histidine degradation, histidine => N-formiminoglutamate => glutamate |           |
| 2558670503 | DRAFT_01171 | Metacyc        | HISDEG-PWY: histidine degradation I                                           |           |

|            |             |                |                                                                           |          |
|------------|-------------|----------------|---------------------------------------------------------------------------|----------|
| 2558670503 | DRAFT_01171 | Metacyc        | PWY-5028: histidine degradation II                                        |          |
| 2558670503 | DRAFT_01171 | Metacyc        | PWY-5030: histidine degradation III                                       |          |
| 2558670503 | DRAFT_01171 | Metacyc        | HISHP-PWY: histidine degradation VI                                       |          |
| 2558670503 | DRAFT_01171 | IMG_pathway    | 189: L-histidine degradation to L-glutamate and formamide                 |          |
| 2558670503 | DRAFT_01171 | IMG_pathway    | 190: L-histidine degradation to L-glutamate and formiminotetrahydrofolate |          |
| 2558670503 | DRAFT_01171 | COG_category   | [E] Amino acid transport and metabolism                                   |          |
| 2558670503 | DRAFT_01171 | COG2987        | Urocanate hydratase                                                       | 0.00E+00 |
| 2558670503 | DRAFT_01171 | pfam01175      | Urocanase                                                                 | 0.00E+00 |
| 2558670503 | DRAFT_01171 | EC:4.2.1.49    | Urocanate hydratase.                                                      |          |
| 2558670503 | DRAFT_01171 | TIGR01228      | urocanate hydratase                                                       | 0.00E+00 |
| 2558670503 | DRAFT_01171 | KO:K01712      | urocanate hydratase [EC:4.2.1.49]                                         | 0.00E+00 |
| 2558670503 | DRAFT_01171 | ITERM:00501    | urocanate hydratase (EC 4.2.1.49)                                         |          |
| 2558670503 | DRAFT_01171 | Locus_type     | CDS                                                                       |          |
| 2558670503 | DRAFT_01171 | Product_name   | urocanate hydratase (EC 4.2.1.49)                                         |          |
| 2558670503 | DRAFT_01171 | Scaffold       | DRAFT_contig_70_136_len_25737_read_count_476203.22                        |          |
| 2558670503 | DRAFT_01171 | Coordinates    | 14341..16044(-)                                                           |          |
| 2558670503 | DRAFT_01171 | DNA_length     | 1704bp                                                                    |          |
| 2558670503 | DRAFT_01171 | Protein_length | 567aa                                                                     |          |
| 2558670503 | DRAFT_01171 | GC             |                                                                           | 0.62     |

|            |             |                |                                                                        |          |
|------------|-------------|----------------|------------------------------------------------------------------------|----------|
| 2558670504 | DRAFT_01172 | KEGG_module    | M00016: Lysine biosynthesis, succinyl-DAP pathway, aspartate => lysine |          |
| 2558670504 | DRAFT_01172 | Metacyc        | DAPLYSINESYN-PWY: lysine biosynthesis I                                |          |
| 2558670504 | DRAFT_01172 | COG_category   | [E] Amino acid transport and metabolism                                |          |
| 2558670504 | DRAFT_01172 | COG0624        | Acetylornithine deacetylase/Succinyl-diaminopimelate desuccinylase a   | 7.00E-46 |
| 2558670504 | DRAFT_01172 | pfam07687      | M20_dimer                                                              | 3.40E-16 |
| 2558670504 | DRAFT_01172 | pfam01546      | Peptidase_M20                                                          | 1.40E-19 |
| 2558670504 | DRAFT_01172 | EC:3.5.1.18    | Succinyl-diaminopimelate desuccinylase.                                |          |
| 2558670504 | DRAFT_01172 | KO:K01439      | succinyl-diaminopimelate desuccinylase [EC:3.5.1.18]                   | 0.00E+00 |
| 2558670504 | DRAFT_01172 | Locus_type     | CDS                                                                    |          |
| 2558670504 | DRAFT_01172 | Product_name   | Acetylornithine deacetylase/Succinyl-diaminopimelate desuccinylase     |          |
| 2558670504 | DRAFT_01172 | Scaffold       | DRAFT_contig_70_136_len_25737_read_count_476203.22                     |          |
| 2558670504 | DRAFT_01172 | Coordinates    | 16163..17059(+)                                                        |          |
| 2558670504 | DRAFT_01172 | DNA_length     | 897bp                                                                  |          |
| 2558670504 | DRAFT_01172 | Protein_length | 298aa                                                                  |          |

|            |             |                |                                                                               |           |
|------------|-------------|----------------|-------------------------------------------------------------------------------|-----------|
| 2558670504 | DRAFT_01172 | GC             |                                                                               | 0.51      |
| 2558670505 | DRAFT_01173 | Locus_type     | CDS                                                                           |           |
| 2558670505 | DRAFT_01173 | Product_name   | hypothetical protein                                                          |           |
| 2558670505 | DRAFT_01173 | Scaffold       | DRAFT_contig_70_136_len_25737_read_count_476203.22                            |           |
| 2558670505 | DRAFT_01173 | Coordinates    | 17084..17410(+)                                                               |           |
| 2558670505 | DRAFT_01173 | DNA_length     | 327bp                                                                         |           |
| 2558670505 | DRAFT_01173 | Protein_length | 108aa                                                                         |           |
| 2558670505 | DRAFT_01173 | GC             |                                                                               | 0.57      |
| 2558670506 | DRAFT_01174 | Metacyc        | GLNSYN-PWY: glutamine biosynthesis I                                          |           |
| 2558670506 | DRAFT_01174 | Metacyc        | PWY490-3: nitrate reduction VI (assimilatory)                                 |           |
| 2558670506 | DRAFT_01174 | Metacyc        | PWY-6964: ammonia assimilation cycle II                                       |           |
| 2558670506 | DRAFT_01174 | Metacyc        | PWY-381: nitrate reduction II (assimilatory)                                  |           |
| 2558670506 | DRAFT_01174 | Metacyc        | PWY-6549: glutamine biosynthesis III                                          |           |
| 2558670506 | DRAFT_01174 | Metacyc        | PWY-6963: ammonia assimilation cycle I                                        |           |
| 2558670506 | DRAFT_01174 | Metacyc        | PWY-5675: nitrate reduction V (assimilatory)                                  |           |
| 2558670506 | DRAFT_01174 | COG_category   | [E] Amino acid transport and metabolism                                       |           |
| 2558670506 | DRAFT_01174 | COG0174        | Glutamine synthetase                                                          | 4.00E-114 |
| 2558670506 | DRAFT_01174 | pfam00120      | Gln-synt_C                                                                    | 6.20E-78  |
| 2558670506 | DRAFT_01174 | pfam03951      | Gln-synt_N                                                                    | 4.00E-16  |
| 2558670506 | DRAFT_01174 | EC:6.3.1.2     | Glutamate--ammonia ligase.                                                    |           |
| 2558670506 | DRAFT_01174 | TIGR00653      | glutamine synthetase, type I                                                  | 0.00E+00  |
| 2558670506 | DRAFT_01174 | KO:K01915      | glutamine synthetase [EC:6.3.1.2]                                             | 0.00E+00  |
| 2558670506 | DRAFT_01174 | Locus_type     | CDS                                                                           |           |
| 2558670506 | DRAFT_01174 | Product_name   | Glutamine synthetase                                                          |           |
| 2558670506 | DRAFT_01174 | Scaffold       | DRAFT_contig_70_136_len_25737_read_count_476203.22                            |           |
| 2558670506 | DRAFT_01174 | Coordinates    | 17613..18941(+)                                                               |           |
| 2558670506 | DRAFT_01174 | DNA_length     | 1329bp                                                                        |           |
| 2558670506 | DRAFT_01174 | Protein_length | 442aa                                                                         |           |
| 2558670506 | DRAFT_01174 | GC             |                                                                               | 0.55      |
| 2558670507 | DRAFT_01175 | KEGG_module    | M00045: Histidine degradation, histidine => N-formiminoglutamate => glutamate |           |
| 2558670507 | DRAFT_01175 | Metacyc        | PWY-5030: histidine degradation III                                           |           |

|            |             |                |                                                                           |           |
|------------|-------------|----------------|---------------------------------------------------------------------------|-----------|
| 2558670507 | DRAFT_01175 | Metacyc        | HISDEG-PWY: histidine degradation I                                       |           |
| 2558670507 | DRAFT_01175 | Metacyc        | PWY-5028: histidine degradation II                                        |           |
| 2558670507 | DRAFT_01175 | Metacyc        | HISHP-PWY: histidine degradation VI                                       |           |
| 2558670507 | DRAFT_01175 | IMG_pathway    | 189: L-histidine degradation to L-glutamate and formamide                 |           |
| 2558670507 | DRAFT_01175 | IMG_pathway    | 190: L-histidine degradation to L-glutamate and formiminotetrahydrofolate |           |
| 2558670507 | DRAFT_01175 | COG_category   | [Q] Secondary metabolites biosynthesis, transport and catabolism          |           |
| 2558670507 | DRAFT_01175 | COG1228        | Imidazolonepropionase and related amidohydrolases                         | 3.00E-77  |
| 2558670507 | DRAFT_01175 | pfam01979      | Amidohydro_1                                                              | 1.20E-10  |
| 2558670507 | DRAFT_01175 | pfam13594      | Amidohydro_5                                                              | 2.20E-14  |
| 2558670507 | DRAFT_01175 | EC:3.5.2.7     | Imidazolonepropionase.                                                    |           |
| 2558670507 | DRAFT_01175 | TIGR01224      | imidazolonepropionase                                                     | 2.10E-127 |
| 2558670507 | DRAFT_01175 | KO:K01468      | imidazolonepropionase [EC:3.5.2.7]                                        | 0.00E+00  |
| 2558670507 | DRAFT_01175 | ITERM:00502    | imidazolonepropionase (EC 3.5.2.7)                                        |           |
| 2558670507 | DRAFT_01175 | Locus_type     | CDS                                                                       |           |
| 2558670507 | DRAFT_01175 | Product_name   | imidazolonepropionase (EC 3.5.2.7)                                        |           |
| 2558670507 | DRAFT_01175 | Scaffold       | DRAFT_contig_70_136_len_25737_read_count_476203.22                        |           |
| 2558670507 | DRAFT_01175 | Coordinates    | 18962..20233(+)                                                           |           |
| 2558670507 | DRAFT_01175 | DNA_length     | 1272bp                                                                    |           |
| 2558670507 | DRAFT_01175 | Protein_length | 423aa                                                                     |           |
| 2558670507 | DRAFT_01175 | GC             |                                                                           | 0.56      |
| 2558670508 | DRAFT_01176 | COG_category   | [B] Chromatin structure and dynamics                                      |           |
| 2558670508 | DRAFT_01176 | COG_category   | [Q] Secondary metabolites biosynthesis, transport and catabolism          |           |
| 2558670508 | DRAFT_01176 | COG0123        | Deacetylases, including yeast histone deacetylase and acetoin utilization | 1.00E-74  |
| 2558670508 | DRAFT_01176 | pfam00850      | Hist_deacetyl                                                             | 1.10E-71  |
| 2558670508 | DRAFT_01176 | KO:K04768      | acetoin utilization protein AcuC                                          | 0.00E+00  |
| 2558670508 | DRAFT_01176 | Locus_type     | CDS                                                                       |           |
| 2558670508 | DRAFT_01176 | Product_name   | Deacetylases, including yeast histone deacetylase and acetoin utilization |           |
| 2558670508 | DRAFT_01176 | Scaffold       | DRAFT_contig_70_136_len_25737_read_count_476203.22                        |           |
| 2558670508 | DRAFT_01176 | Coordinates    | 20358..21341(+)                                                           |           |
| 2558670508 | DRAFT_01176 | DNA_length     | 984bp                                                                     |           |
| 2558670508 | DRAFT_01176 | Protein_length | 327aa                                                                     |           |
| 2558670508 | DRAFT_01176 | GC             |                                                                           | 0.57      |

|            |             |                |                                                                               |          |
|------------|-------------|----------------|-------------------------------------------------------------------------------|----------|
| 2558670509 | DRAFT_01177 | KEGG_module    | M00045: Histidine degradation, histidine => N-formiminoglutamate => glutamate |          |
| 2558670509 | DRAFT_01177 | Metacyc        | PWY-5030: histidine degradation III                                           |          |
| 2558670509 | DRAFT_01177 | Metacyc        | PWY-5028: histidine degradation II                                            |          |
| 2558670509 | DRAFT_01177 | Metacyc        | HISDEG-PWY: histidine degradation I                                           |          |
| 2558670509 | DRAFT_01177 | Metacyc        | HISHP-PWY: histidine degradation VI                                           |          |
| 2558670509 | DRAFT_01177 | IMG_pathway    | 189: L-histidine degradation to L-glutamate and formamide                     |          |
| 2558670509 | DRAFT_01177 | IMG_pathway    | 190: L-histidine degradation to L-glutamate and formiminotetrahydrofolate     |          |
| 2558670509 | DRAFT_01177 | COG_category   | [E] Amino acid transport and metabolism                                       |          |
| 2558670509 | DRAFT_01177 | COG2986        | Histidine ammonia-lyase                                                       | 0.00E+00 |
| 2558670509 | DRAFT_01177 | pfam00221      | Lyase_aromatic                                                                | 0.00E+00 |
| 2558670509 | DRAFT_01177 | EC:4.3.1.3     | Histidine ammonia-lyase.                                                      |          |
| 2558670509 | DRAFT_01177 | TIGR01225      | histidine ammonia-lyase                                                       | 0.00E+00 |
| 2558670509 | DRAFT_01177 | KO:K01745      | histidine ammonia-lyase [EC:4.3.1.3]                                          | 0.00E+00 |
| 2558670509 | DRAFT_01177 | ITERM:00500    | histidine ammonia-lyase (EC 4.3.1.3)                                          |          |
| 2558670509 | DRAFT_01177 | Locus_type     | CDS                                                                           |          |
| 2558670509 | DRAFT_01177 | Product_name   | histidine ammonia-lyase (EC 4.3.1.3)                                          |          |
| 2558670509 | DRAFT_01177 | Scaffold       | DRAFT_contig_70_136_len_25737_read_count_476203.22                            |          |
| 2558670509 | DRAFT_01177 | Coordinates    | 21463..23004(+)                                                               |          |
| 2558670509 | DRAFT_01177 | DNA_length     | 1542bp                                                                        |          |
| 2558670509 | DRAFT_01177 | Protein_length | 513aa                                                                         |          |
| 2558670509 | DRAFT_01177 | GC             |                                                                               | 0.54     |
| 2558670510 | DRAFT_01178 | pfam13385      | Laminin_G_3                                                                   | 5.60E-10 |
| 2558670510 | DRAFT_01178 | Locus_type     | CDS                                                                           |          |
| 2558670510 | DRAFT_01178 | Product_name   | Concanavalin A-like lectin/glucanases superfamily                             |          |
| 2558670510 | DRAFT_01178 | Scaffold       | DRAFT_contig_70_136_len_25737_read_count_476203.22                            |          |
| 2558670510 | DRAFT_01178 | Coordinates    | 23469..24881(-)                                                               |          |
| 2558670510 | DRAFT_01178 | DNA_length     | 1413bp                                                                        |          |
| 2558670510 | DRAFT_01178 | Protein_length | 470aa                                                                         |          |
| 2558670510 | DRAFT_01178 | GC             |                                                                               | 0.55     |
| 2558670510 | DRAFT_01178 | Transmembrane  | Yes                                                                           |          |
| 2558670511 | DRAFT_01179 | COG_category   | [S] Function unknown                                                          |          |
| 2558670511 | DRAFT_01179 | COG0393        | Uncharacterized conserved protein                                             | 2.00E-27 |



|            |             |                |                                                  |                                                    |           |
|------------|-------------|----------------|--------------------------------------------------|----------------------------------------------------|-----------|
| 2558670511 | DRAFT_01179 | pfam01906      | YbjQ_1                                           |                                                    | 3.20E-31  |
| 2558670511 | DRAFT_01179 | Locus_type     |                                                  | CDS                                                |           |
| 2558670511 | DRAFT_01179 | Product_name   |                                                  | Uncharacterized conserved protein                  |           |
| 2558670511 | DRAFT_01179 | Scaffold       |                                                  | DRAFT_contig_70_136_len_25737_read_count_476203.22 |           |
| 2558670511 | DRAFT_01179 | Coordinates    |                                                  | 25104..25499(-)                                    |           |
| 2558670511 | DRAFT_01179 | DNA_length     |                                                  | 396bp                                              |           |
| 2558670511 | DRAFT_01179 | Protein_length |                                                  | 131aa                                              |           |
| 2558670511 | DRAFT_01179 | GC             |                                                  |                                                    | 0.61      |
|            |             |                |                                                  |                                                    |           |
| 2558670512 | DRAFT_01180 | Locus_type     |                                                  | CDS                                                |           |
| 2558670512 | DRAFT_01180 | Product_name   |                                                  | hypothetical protein                               |           |
| 2558670512 | DRAFT_01180 | Scaffold       |                                                  | DRAFT_contig_70_139_len_25505_read_count_420782.23 |           |
| 2558670512 | DRAFT_01180 | Coordinates    |                                                  | 158..295(+)                                        |           |
| 2558670512 | DRAFT_01180 | DNA_length     |                                                  | 138bp                                              |           |
| 2558670512 | DRAFT_01180 | Protein_length |                                                  | 45aa                                               |           |
| 2558670512 | DRAFT_01180 | GC             |                                                  |                                                    | 0.6       |
|            |             |                |                                                  |                                                    |           |
| 2558670513 | DRAFT_01181 | COG_category   | [L] Replication, recombination and repair        |                                                    |           |
| 2558670513 | DRAFT_01181 | COG0468        | RecA/RadA recombinase                            |                                                    | 1.00E-64  |
| 2558670513 | DRAFT_01181 | pfam08423      | Rad51                                            |                                                    | 8.50E-95  |
| 2558670513 | DRAFT_01181 | TIGR02236      | DNA repair and recombination protein RadA        |                                                    | 1.40E-128 |
| 2558670513 | DRAFT_01181 | KO:K04483      | DNA repair protein RadA                          |                                                    | 0.00E+00  |
| 2558670513 | DRAFT_01181 | Locus_type     |                                                  | CDS                                                |           |
| 2558670513 | DRAFT_01181 | Product_name   |                                                  | DNA repair and recombination protein RadA          |           |
| 2558670513 | DRAFT_01181 | Scaffold       |                                                  | DRAFT_contig_70_139_len_25505_read_count_420782.23 |           |
| 2558670513 | DRAFT_01181 | Coordinates    |                                                  | 329..1321(-)                                       |           |
| 2558670513 | DRAFT_01181 | DNA_length     |                                                  | 993bp                                              |           |
| 2558670513 | DRAFT_01181 | Protein_length |                                                  | 330aa                                              |           |
| 2558670513 | DRAFT_01181 | GC             |                                                  |                                                    | 0.6       |
|            |             |                |                                                  |                                                    |           |
| 2558670514 | DRAFT_01182 | KEGG_module    | M00359: Aminoacyl-tRNA biosynthesis, eukaryotes  |                                                    |           |
| 2558670514 | DRAFT_01182 | KEGG_module    | M00360: Aminoacyl-tRNA biosynthesis, prokaryotes |                                                    |           |
| 2558670514 | DRAFT_01182 | Metacyc        | TRNA-CHARGING-PWY: tRNA charging                 |                                                    |           |
| 2558670514 | DRAFT_01182 | IMG_pathway    | 499: L-asparagine ligation to tRNA(Asn)          |                                                    |           |

|            |             |                |                                                               |           |
|------------|-------------|----------------|---------------------------------------------------------------|-----------|
| 2558670514 | DRAFT_01182 | COG_category   | [J] Translation, ribosomal structure and biogenesis           |           |
| 2558670514 | DRAFT_01182 | COG0017        | Aspartyl/asparaginyl-tRNA synthetases                         | 0.00E+00  |
| 2558670514 | DRAFT_01182 | pfam01336      | tRNA_anti-codon                                               | 3.30E-10  |
| 2558670514 | DRAFT_01182 | pfam00152      | tRNA-synt_2                                                   | 4.70E-73  |
| 2558670514 | DRAFT_01182 | EC:6.1.1.22    | Asparagine--tRNA ligase.                                      |           |
| 2558670514 | DRAFT_01182 | TIGR00457      | asparaginyl-tRNA synthetase                                   | 4.70E-115 |
| 2558670514 | DRAFT_01182 | KO:K01893      | asparaginyl-tRNA synthetase [EC:6.1.1.22]                     | 0.00E+00  |
| 2558670514 | DRAFT_01182 | ITERM:00392    | asparaginyl-tRNA synthetase (EC 6.1.1.22)                     |           |
| 2558670514 | DRAFT_01182 | Locus_type     | CDS                                                           |           |
| 2558670514 | DRAFT_01182 | Product_name   | asparaginyl-tRNA synthetase (EC 6.1.1.22)                     |           |
| 2558670514 | DRAFT_01182 | Scaffold       | DRAFT_contig_70_139_len_25505_read_count_420782.23            |           |
| 2558670514 | DRAFT_01182 | Coordinates    | 1359..2651(-)                                                 |           |
| 2558670514 | DRAFT_01182 | DNA_length     | 1293bp                                                        |           |
| 2558670514 | DRAFT_01182 | Protein_length | 430aa                                                         |           |
| 2558670514 | DRAFT_01182 | GC             |                                                               | 0.6       |
| 2558670515 | DRAFT_01183 | COG_category   | [S] Function unknown                                          |           |
| 2558670515 | DRAFT_01183 | COG2078        | Uncharacterized conserved protein                             | 3.00E-58  |
| 2558670515 | DRAFT_01183 | pfam01871      | AMMECR1                                                       | 4.40E-53  |
| 2558670515 | DRAFT_01183 | TIGR04335      | AmmeMemoRadiSam system protein A                              | 1.00E-53  |
| 2558670515 | DRAFT_01183 | TIGR00296      | uncharacterized protein, PH0010 family                        | 1.60E-64  |
| 2558670515 | DRAFT_01183 | KO:K09141      | hypothetical protein                                          | 0.00E+00  |
| 2558670515 | DRAFT_01183 | Locus_type     | CDS                                                           |           |
| 2558670515 | DRAFT_01183 | Product_name   | uncharacterized protein, PH0010 family/AmmeMemoRadiSam system |           |
| 2558670515 | DRAFT_01183 | Scaffold       | DRAFT_contig_70_139_len_25505_read_count_420782.23            |           |
| 2558670515 | DRAFT_01183 | Coordinates    | 2837..3451(-)                                                 |           |
| 2558670515 | DRAFT_01183 | DNA_length     | 615bp                                                         |           |
| 2558670515 | DRAFT_01183 | Protein_length | 204aa                                                         |           |
| 2558670515 | DRAFT_01183 | GC             |                                                               | 0.61      |
| 2558670516 | DRAFT_01184 | COG_category   | [S] Function unknown                                          |           |
| 2558670516 | DRAFT_01184 | COG1656        | Uncharacterized conserved protein                             | 1.00E-26  |
| 2558670516 | DRAFT_01184 | pfam01927      | Mut7-C                                                        | 1.50E-30  |
| 2558670516 | DRAFT_01184 | KO:K09122      | hypothetical protein                                          | 6.60E-22  |

|            |             |                |                                                       |          |
|------------|-------------|----------------|-------------------------------------------------------|----------|
| 2558670516 | DRAFT_01184 | Locus_type     | CDS                                                   |          |
| 2558670516 | DRAFT_01184 | Product_name   | Uncharacterized conserved protein                     |          |
| 2558670516 | DRAFT_01184 | Scaffold       | DRAFT_contig_70_139_len_25505_read_count_420782.23    |          |
| 2558670516 | DRAFT_01184 | Coordinates    | 3435..3899(-)                                         |          |
| 2558670516 | DRAFT_01184 | DNA_length     | 465bp                                                 |          |
| 2558670516 | DRAFT_01184 | Protein_length | 154aa                                                 |          |
| 2558670516 | DRAFT_01184 | GC             |                                                       | 0.61     |
|            |             |                |                                                       |          |
| 2558670517 | DRAFT_01185 | KEGG_module    | M00360: Aminoacyl-tRNA biosynthesis, prokaryotes      |          |
| 2558670517 | DRAFT_01185 | KEGG_module    | M00359: Aminoacyl-tRNA biosynthesis, eukaryotes       |          |
| 2558670517 | DRAFT_01185 | Metacyc        | TRNA-CHARGING-PWY: tRNA charging                      |          |
| 2558670517 | DRAFT_01185 | COG_category   | [J] Translation, ribosomal structure and biogenesis   |          |
| 2558670517 | DRAFT_01185 | COG0162        | Tyrosyl-tRNA synthetase                               | 2.00E-45 |
| 2558670517 | DRAFT_01185 | pfam00579      | tRNA-synt_1b                                          | 2.00E-08 |
| 2558670517 | DRAFT_01185 | pfam00579      | tRNA-synt_1b                                          | 2.40E-26 |
| 2558670517 | DRAFT_01185 | EC:6.1.1.1     | Tyrosine--tRNA ligase.                                |          |
| 2558670517 | DRAFT_01185 | KO:K01866      | tyrosyl-tRNA synthetase [EC:6.1.1.1]                  | 0.00E+00 |
| 2558670517 | DRAFT_01185 | Locus_type     | CDS                                                   |          |
| 2558670517 | DRAFT_01185 | Product_name   | Tyrosyl-tRNA synthetase                               |          |
| 2558670517 | DRAFT_01185 | Scaffold       | DRAFT_contig_70_139_len_25505_read_count_420782.23    |          |
| 2558670517 | DRAFT_01185 | Coordinates    | 3967..5055(-)                                         |          |
| 2558670517 | DRAFT_01185 | DNA_length     | 1089bp                                                |          |
| 2558670517 | DRAFT_01185 | Protein_length | 362aa                                                 |          |
| 2558670517 | DRAFT_01185 | GC             |                                                       | 0.58     |
|            |             |                |                                                       |          |
| 2558670518 | DRAFT_01186 | IMG_pathway    | 964: DsbC-DsbD disulfide-isomerizing reductive system |          |
| 2558670518 | DRAFT_01186 | pfam00085      | Thioredoxin                                           | 3.60E-31 |
| 2558670518 | DRAFT_01186 | TIGR01068      | thioredoxin                                           | 7.00E-40 |
| 2558670518 | DRAFT_01186 | KO:K03671      | thioredoxin 1                                         | 1.50E-28 |
| 2558670518 | DRAFT_01186 | ITERM:01894    | thioredoxin                                           |          |
| 2558670518 | DRAFT_01186 | Locus_type     | CDS                                                   |          |
| 2558670518 | DRAFT_01186 | Product_name   | thioredoxin                                           |          |
| 2558670518 | DRAFT_01186 | Scaffold       | DRAFT_contig_70_139_len_25505_read_count_420782.23    |          |
| 2558670518 | DRAFT_01186 | Coordinates    | 5177..5512(-)                                         |          |

|            |             |                |                                                              |          |
|------------|-------------|----------------|--------------------------------------------------------------|----------|
| 2558670518 | DRAFT_01186 | DNA_length     | 336bp                                                        |          |
| 2558670518 | DRAFT_01186 | Protein_length | 111aa                                                        |          |
| 2558670518 | DRAFT_01186 | GC             |                                                              | 0.57     |
| 2558670519 | DRAFT_01187 | COG_category   | [H] Coenzyme transport and metabolism                        |          |
| 2558670519 | DRAFT_01187 | COG0301        | Thiamine biosynthesis ATP pyrophosphatase                    | 3.00E-87 |
| 2558670519 | DRAFT_01187 | pfam02926      | THUMP                                                        | 4.60E-14 |
| 2558670519 | DRAFT_01187 | pfam02568      | Thil                                                         | 1.30E-53 |
| 2558670519 | DRAFT_01187 | TIGR00342      | tRNA sulfurtransferase Thil                                  | 2.40E-94 |
| 2558670519 | DRAFT_01187 | KO:K03151      | thiamine biosynthesis protein Thil                           | 0.00E+00 |
| 2558670519 | DRAFT_01187 | Locus_type     | CDS                                                          |          |
| 2558670519 | DRAFT_01187 | Product_name   | Thiamine biosynthesis ATP pyrophosphatase                    |          |
| 2558670519 | DRAFT_01187 | Scaffold       | DRAFT_contig_70_139_len_25505_read_count_420782.23           |          |
| 2558670519 | DRAFT_01187 | Coordinates    | 5580..6773(-)                                                |          |
| 2558670519 | DRAFT_01187 | DNA_length     | 1194bp                                                       |          |
| 2558670519 | DRAFT_01187 | Protein_length | 397aa                                                        |          |
| 2558670519 | DRAFT_01187 | GC             |                                                              | 0.61     |
| 2558670520 | DRAFT_01188 | Metacyc        | PWY-2681: <i>trans</i>-zeatin biosynthesis                   |          |
| 2558670520 | DRAFT_01188 | Metacyc        | PWY-5381: pyridine nucleotide cycling (plants)               |          |
| 2558670520 | DRAFT_01188 | Metacyc        | PWY-6793: demethylmenaquinol-8 biosynthesis III              |          |
| 2558670520 | DRAFT_01188 | Metacyc        | PWY-5316: nicotine biosynthesis                              |          |
| 2558670520 | DRAFT_01188 | COG_category   | [L] Replication, recombination and repair                    |          |
| 2558670520 | DRAFT_01188 | COG0122        | 3-methyladenine DNA glycosylase/8-oxoguanine DNA glycosylase | 1.00E-33 |
| 2558670520 | DRAFT_01188 | pfam07934      | OGG_N                                                        | 2.00E-23 |
| 2558670520 | DRAFT_01188 | pfam00730      | HhH-GPD                                                      | 7.70E-09 |
| 2558670520 | DRAFT_01188 | EC:4.2.99.18   | DNA-(apurinic or apyrimidinic site) lyase.                   |          |
| 2558670520 | DRAFT_01188 | EC:3.2.2.-     | Hydrolases. Glycosylases. Hydrolyzing N-glycosyl compounds.  |          |
| 2558670520 | DRAFT_01188 | TIGR00588      | 8-oxoguanine DNA-glycosylase (ogg)                           | 5.80E-64 |
| 2558670520 | DRAFT_01188 | KO:K03660      | N-glycosylase/DNA lyase [EC:3.2.2.- 4.2.99.18]               | 0.00E+00 |
| 2558670520 | DRAFT_01188 | Locus_type     | CDS                                                          |          |
| 2558670520 | DRAFT_01188 | Product_name   | 3-methyladenine DNA glycosylase/8-oxoguanine DNA glycosylase |          |
| 2558670520 | DRAFT_01188 | Scaffold       | DRAFT_contig_70_139_len_25505_read_count_420782.23           |          |
| 2558670520 | DRAFT_01188 | Coordinates    | 7330..8244(-)                                                |          |

|            |             |                |                                                            |           |
|------------|-------------|----------------|------------------------------------------------------------|-----------|
| 2558670520 | DRAFT_01188 | DNA_length     | 915bp                                                      |           |
| 2558670520 | DRAFT_01188 | Protein_length | 304aa                                                      |           |
| 2558670520 | DRAFT_01188 | GC             |                                                            | 0.57      |
| 2558670521 | DRAFT_01189 | KEGG_module    | M00121: Heme biosynthesis, glutamate => protoheme/siroheme |           |
| 2558670521 | DRAFT_01189 | Metacyc        | PWY-5188: tetrapyrrole biosynthesis I (from glutamate)     |           |
| 2558670521 | DRAFT_01189 | COG_category   | [H] Coenzyme transport and metabolism                      |           |
| 2558670521 | DRAFT_01189 | COG0001        | Glutamate-1-semialdehyde aminotransferase                  | 2.00E-109 |
| 2558670521 | DRAFT_01189 | pfam00202      | Aminotran_3                                                | 9.70E-48  |
| 2558670521 | DRAFT_01189 | EC:5.4.3.8     | Glutamate-1-semialdehyde 2,1-aminomutase.                  |           |
| 2558670521 | DRAFT_01189 | TIGR00713      | glutamate-1-semialdehyde-2,1-aminomutase                   | 3.70E-105 |
| 2558670521 | DRAFT_01189 | KO:K01845      | glutamate-1-semialdehyde 2,1-aminomutase [EC:5.4.3.8]      | 0.00E+00  |
| 2558670521 | DRAFT_01189 | Locus_type     | CDS                                                        |           |
| 2558670521 | DRAFT_01189 | Product_name   | Glutamate-1-semialdehyde aminotransferase                  |           |
| 2558670521 | DRAFT_01189 | Scaffold       | DRAFT_contig_70_139_len_25505_read_count_420782.23         |           |
| 2558670521 | DRAFT_01189 | Coordinates    | 8332..9642(+)                                              |           |
| 2558670521 | DRAFT_01189 | DNA_length     | 1311bp                                                     |           |
| 2558670521 | DRAFT_01189 | Protein_length | 436aa                                                      |           |
| 2558670521 | DRAFT_01189 | GC             |                                                            | 0.59      |
| 2558670522 | DRAFT_01190 | Metacyc        | DETOX1-PWY: superoxide radicals degradation                |           |
| 2558670522 | DRAFT_01190 | Metacyc        | PWY-6854: ethylene biosynthesis III (microbes)             |           |
| 2558670522 | DRAFT_01190 | COG_category   | [P] Inorganic ion transport and metabolism                 |           |
| 2558670522 | DRAFT_01190 | COG0605        | Superoxide dismutase                                       | 2.00E-57  |
| 2558670522 | DRAFT_01190 | pfam02777      | Sod_Fe_C                                                   | 6.80E-33  |
| 2558670522 | DRAFT_01190 | pfam00081      | Sod_Fe_N                                                   | 2.80E-26  |
| 2558670522 | DRAFT_01190 | EC:1.15.1.1    | Superoxide dismutase.                                      |           |
| 2558670522 | DRAFT_01190 | KO:K04564      | superoxide dismutase, Fe-Mn family [EC:1.15.1.1]           | 0.00E+00  |
| 2558670522 | DRAFT_01190 | Locus_type     | CDS                                                        |           |
| 2558670522 | DRAFT_01190 | Product_name   | Superoxide dismutase                                       |           |
| 2558670522 | DRAFT_01190 | Scaffold       | DRAFT_contig_70_139_len_25505_read_count_420782.23         |           |
| 2558670522 | DRAFT_01190 | Coordinates    | 9654..10262(-)                                             |           |
| 2558670522 | DRAFT_01190 | DNA_length     | 609bp                                                      |           |
| 2558670522 | DRAFT_01190 | Protein_length | 202aa                                                      |           |

|            |             |                |                                                                                  |          |
|------------|-------------|----------------|----------------------------------------------------------------------------------|----------|
| 2558670522 | DRAFT_01190 | GC             |                                                                                  | 0.56     |
| 2558670523 | DRAFT_01191 | KEGG_module    | M00004: Pentose phosphate pathway (Pentose phosphate cycle)                      |          |
| 2558670523 | DRAFT_01191 | KEGG_module    | M00007: Pentose phosphate pathway, non-oxidative phase, fructose 6P => ribose 5P |          |
| 2558670523 | DRAFT_01191 | Metacyc        | PWY-1861: formaldehyde assimilation II (RuMP Cycle)                              |          |
| 2558670523 | DRAFT_01191 | Metacyc        | P185-PWY: formaldehyde assimilation III (dihydroxyacetone cycle)                 |          |
| 2558670523 | DRAFT_01191 | Metacyc        | PWY-5723: Rubisco shunt                                                          |          |
| 2558670523 | DRAFT_01191 | Metacyc        | P124-PWY: Bifidobacterium shunt                                                  |          |
| 2558670523 | DRAFT_01191 | Metacyc        | NONOXIPENT-PWY: pentose phosphate pathway (non-oxidative branch)                 |          |
| 2558670523 | DRAFT_01191 | COG_category   | [G] Carbohydrate transport and metabolism                                        |          |
| 2558670523 | DRAFT_01191 | COG0176        | Transaldolase                                                                    | 1.00E-60 |
| 2558670523 | DRAFT_01191 | pfam00923      | Transaldolase                                                                    | 7.40E-55 |
| 2558670523 | DRAFT_01191 | EC:2.2.1.2     | Transaldolase.                                                                   |          |
| 2558670523 | DRAFT_01191 | TIGR00875      | fructose-6-phosphate aldolase, TalC/MipB family                                  | 9.60E-95 |
| 2558670523 | DRAFT_01191 | KO:K00616      | transaldolase [EC:2.2.1.2]                                                       | 0.00E+00 |
| 2558670523 | DRAFT_01191 | Locus_type     | CDS                                                                              |          |
| 2558670523 | DRAFT_01191 | Product_name   | fructose-6-phosphate aldolase, TalC/MipB family                                  |          |
| 2558670523 | DRAFT_01191 | Scaffold       | DRAFT_contig_70_139_len_25505_read_count_420782.23                               |          |
| 2558670523 | DRAFT_01191 | Coordinates    | 10305..10970(-)                                                                  |          |
| 2558670523 | DRAFT_01191 | DNA_length     | 666bp                                                                            |          |
| 2558670523 | DRAFT_01191 | Protein_length | 221aa                                                                            |          |
| 2558670523 | DRAFT_01191 | GC             |                                                                                  | 0.6      |
| 2558670524 | DRAFT_01192 | KEGG_module    | M00165: Reductive pentose phosphate cycle (Calvin cycle)                         |          |
| 2558670524 | DRAFT_01192 | KEGG_module    | M00007: Pentose phosphate pathway, non-oxidative phase, fructose 6P => ribose 5P |          |
| 2558670524 | DRAFT_01192 | KEGG_module    | M00004: Pentose phosphate pathway (Pentose phosphate cycle)                      |          |
| 2558670524 | DRAFT_01192 | KEGG_module    | M00167: Reductive pentose phosphate cycle, glyceraldehyde-3P => RuBP             |          |
| 2558670524 | DRAFT_01192 | Metacyc        | PWY-5723: Rubisco shunt                                                          |          |
| 2558670524 | DRAFT_01192 | Metacyc        | P185-PWY: formaldehyde assimilation III (dihydroxyacetone cycle)                 |          |
| 2558670524 | DRAFT_01192 | Metacyc        | P21-PWY: pentose phosphate pathway (partial)                                     |          |
| 2558670524 | DRAFT_01192 | Metacyc        | PWY-1861: formaldehyde assimilation II (RuMP Cycle)                              |          |
| 2558670524 | DRAFT_01192 | Metacyc        | NONOXIPENT-PWY: pentose phosphate pathway (non-oxidative branch)                 |          |
| 2558670524 | DRAFT_01192 | Metacyc        | CALVIN-PWY: Calvin-Benson-Bassham cycle                                          |          |
| 2558670524 | DRAFT_01192 | Metacyc        | P124-PWY: Bifidobacterium shunt                                                  |          |

|            |             |                |                                                                                  |           |
|------------|-------------|----------------|----------------------------------------------------------------------------------|-----------|
| 2558670524 | DRAFT_01192 | Metacyc        | PWY-6901: xylose degradation IV                                                  |           |
| 2558670524 | DRAFT_01192 | COG_category   | [G] Carbohydrate transport and metabolism                                        |           |
| 2558670524 | DRAFT_01192 | COG3958        | Transketolase, C-terminal subunit                                                | 8.00E-105 |
| 2558670524 | DRAFT_01192 | pfam02780      | Transketolase_C                                                                  | 3.70E-30  |
| 2558670524 | DRAFT_01192 | pfam02779      | Transket_pyr                                                                     | 5.40E-39  |
| 2558670524 | DRAFT_01192 | EC:2.2.1.1     | Transketolase.                                                                   |           |
| 2558670524 | DRAFT_01192 | KO:K00615      | transketolase [EC:2.2.1.1]                                                       | 0.00E+00  |
| 2558670524 | DRAFT_01192 | Locus_type     | CDS                                                                              |           |
| 2558670524 | DRAFT_01192 | Product_name   | Transketolase, C-terminal subunit                                                |           |
| 2558670524 | DRAFT_01192 | Scaffold       | DRAFT_contig_70_139_len_25505_read_count_420782.23                               |           |
| 2558670524 | DRAFT_01192 | Coordinates    | 11005..11952(-)                                                                  |           |
| 2558670524 | DRAFT_01192 | DNA_length     | 948bp                                                                            |           |
| 2558670524 | DRAFT_01192 | Protein_length | 315aa                                                                            |           |
| 2558670524 | DRAFT_01192 | GC             |                                                                                  | 0.59      |
| 2558670525 | DRAFT_01193 | KEGG_module    | M00004: Pentose phosphate pathway (Pentose phosphate cycle)                      |           |
| 2558670525 | DRAFT_01193 | KEGG_module    | M00007: Pentose phosphate pathway, non-oxidative phase, fructose 6P => ribose 5P |           |
| 2558670525 | DRAFT_01193 | Metacyc        | P21-PWY: pentose phosphate pathway (partial)                                     |           |
| 2558670525 | DRAFT_01193 | Metacyc        | P124-PWY: Bifidobacterium shunt                                                  |           |
| 2558670525 | DRAFT_01193 | Metacyc        | RIBITOLUTIL-PWY: ribitol degradation                                             |           |
| 2558670525 | DRAFT_01193 | Metacyc        | P185-PWY: formaldehyde assimilation III (dihydroxyacetone cycle)                 |           |
| 2558670525 | DRAFT_01193 | Metacyc        | DARABCAT-PWY: D-arabinose degradation II                                         |           |
| 2558670525 | DRAFT_01193 | Metacyc        | NONOXIPENT-PWY: pentose phosphate pathway (non-oxidative branch)                 |           |
| 2558670525 | DRAFT_01193 | Metacyc        | P122-PWY: heterolactic fermentation                                              |           |
| 2558670525 | DRAFT_01193 | Metacyc        | PWY-1861: formaldehyde assimilation II (RuMP Cycle)                              |           |
| 2558670525 | DRAFT_01193 | Metacyc        | CALVIN-PWY: Calvin-Benson-Bassham cycle                                          |           |
| 2558670525 | DRAFT_01193 | Metacyc        | PWY-5723: Rubisco shunt                                                          |           |
| 2558670525 | DRAFT_01193 | COG_category   | [G] Carbohydrate transport and metabolism                                        |           |
| 2558670525 | DRAFT_01193 | COG0036        | Pentose-5-phosphate-3-epimerase                                                  | 2.00E-53  |
| 2558670525 | DRAFT_01193 | pfam00834      | Ribul_P_3_epim                                                                   | 4.60E-54  |
| 2558670525 | DRAFT_01193 | EC:5.1.3.1     | Ribulose-phosphate 3-epimerase.                                                  |           |
| 2558670525 | DRAFT_01193 | TIGR01163      | ribulose-phosphate 3-epimerase                                                   | 9.90E-60  |
| 2558670525 | DRAFT_01193 | KO:K01783      | ribulose-phosphate 3-epimerase [EC:5.1.3.1]                                      | 2.80E-45  |
| 2558670525 | DRAFT_01193 | Locus_type     | CDS                                                                              |           |

|            |             |                |                                                                                  |          |
|------------|-------------|----------------|----------------------------------------------------------------------------------|----------|
| 2558670525 | DRAFT_01193 | Product_name   | Pentose-5-phosphate-3-epimerase                                                  |          |
| 2558670525 | DRAFT_01193 | Scaffold       | DRAFT_contig_70_139_len_25505_read_count_420782.23                               |          |
| 2558670525 | DRAFT_01193 | Coordinates    | 11949..12635(-)                                                                  |          |
| 2558670525 | DRAFT_01193 | DNA_length     | 687bp                                                                            |          |
| 2558670525 | DRAFT_01193 | Protein_length | 228aa                                                                            |          |
| 2558670525 | DRAFT_01193 | GC             |                                                                                  | 0.6      |
| 2558670526 | DRAFT_01194 | KEGG_module    | M00165: Reductive pentose phosphate cycle (Calvin cycle)                         |          |
| 2558670526 | DRAFT_01194 | KEGG_module    | M00004: Pentose phosphate pathway (Pentose phosphate cycle)                      |          |
| 2558670526 | DRAFT_01194 | KEGG_module    | M00167: Reductive pentose phosphate cycle, glyceraldehyde-3P => RuBP             |          |
| 2558670526 | DRAFT_01194 | KEGG_module    | M00007: Pentose phosphate pathway, non-oxidative phase, fructose 6P => ribose 5P |          |
| 2558670526 | DRAFT_01194 | Metacyc        | P124-PWY: Bifidobacterium shunt                                                  |          |
| 2558670526 | DRAFT_01194 | Metacyc        | NONOXIPENT-PWY: pentose phosphate pathway (non-oxidative branch)                 |          |
| 2558670526 | DRAFT_01194 | Metacyc        | PWY-1861: formaldehyde assimilation II (RuMP Cycle)                              |          |
| 2558670526 | DRAFT_01194 | Metacyc        | PWY-6901: xylose degradation IV                                                  |          |
| 2558670526 | DRAFT_01194 | Metacyc        | CALVIN-PWY: Calvin-Benson-Bassham cycle                                          |          |
| 2558670526 | DRAFT_01194 | Metacyc        | P21-PWY: pentose phosphate pathway (partial)                                     |          |
| 2558670526 | DRAFT_01194 | Metacyc        | PWY-5723: Rubisco shunt                                                          |          |
| 2558670526 | DRAFT_01194 | Metacyc        | P185-PWY: formaldehyde assimilation III (dihydroxyacetone cycle)                 |          |
| 2558670526 | DRAFT_01194 | COG_category   | [G] Carbohydrate transport and metabolism                                        |          |
| 2558670526 | DRAFT_01194 | COG3959        | Transketolase, N-terminal subunit                                                | 2.00E-88 |
| 2558670526 | DRAFT_01194 | pfam00456      | Transketolase_N                                                                  | 9.00E-64 |
| 2558670526 | DRAFT_01194 | EC:2.2.1.1     | Transketolase.                                                                   |          |
| 2558670526 | DRAFT_01194 | KO:K00615      | transketolase [EC:2.2.1.1]                                                       | 0.00E+00 |
| 2558670526 | DRAFT_01194 | Locus_type     | CDS                                                                              |          |
| 2558670526 | DRAFT_01194 | Product_name   | transketolase subunit A (EC 2.2.1.1)                                             |          |
| 2558670526 | DRAFT_01194 | Scaffold       | DRAFT_contig_70_139_len_25505_read_count_420782.23                               |          |
| 2558670526 | DRAFT_01194 | Coordinates    | 12640..13458(-)                                                                  |          |
| 2558670526 | DRAFT_01194 | DNA_length     | 819bp                                                                            |          |
| 2558670526 | DRAFT_01194 | Protein_length | 272aa                                                                            |          |
| 2558670526 | DRAFT_01194 | GC             |                                                                                  | 0.6      |
| 2558670527 | DRAFT_01195 | pfam00294      | PfkB                                                                             | 5.30E-21 |
| 2558670527 | DRAFT_01195 | TIGR02198      | rfaE bifunctional protein, domain I                                              | 1.10E-67 |



|            |             |                |                                                                                        |          |
|------------|-------------|----------------|----------------------------------------------------------------------------------------|----------|
| 2558670527 | DRAFT_01195 | Locus_type     | CDS                                                                                    |          |
| 2558670527 | DRAFT_01195 | Product_name   | ADP-heptose synthase, bifunctional sugar kinase/adenylyltransferase                    |          |
| 2558670527 | DRAFT_01195 | Scaffold       | DRAFT_contig_70_139_len_25505_read_count_420782.23                                     |          |
| 2558670527 | DRAFT_01195 | Coordinates    | 13458..14498(-)                                                                        |          |
| 2558670527 | DRAFT_01195 | DNA_length     | 1041bp                                                                                 |          |
| 2558670527 | DRAFT_01195 | Protein_length | 346aa                                                                                  |          |
| 2558670527 | DRAFT_01195 | GC             |                                                                                        | 0.6      |
|            |             |                |                                                                                        |          |
| 2558670528 | DRAFT_01196 | Locus_type     | CDS                                                                                    |          |
| 2558670528 | DRAFT_01196 | Product_name   | hypothetical protein                                                                   |          |
| 2558670528 | DRAFT_01196 | Scaffold       | DRAFT_contig_70_139_len_25505_read_count_420782.23                                     |          |
| 2558670528 | DRAFT_01196 | Coordinates    | 14528..15049(-)                                                                        |          |
| 2558670528 | DRAFT_01196 | DNA_length     | 522bp                                                                                  |          |
| 2558670528 | DRAFT_01196 | Protein_length | 173aa                                                                                  |          |
| 2558670528 | DRAFT_01196 | GC             |                                                                                        | 0.58     |
|            |             |                |                                                                                        |          |
| 2558670529 | DRAFT_01197 | pfam03176      | MMPL                                                                                   | 2.80E-44 |
| 2558670529 | DRAFT_01197 | pfam03176      | MMPL                                                                                   | 3.40E-44 |
| 2558670529 | DRAFT_01197 | Locus_type     | CDS                                                                                    |          |
| 2558670529 | DRAFT_01197 | Product_name   | Predicted drug exporters of the RND superfamily                                        |          |
| 2558670529 | DRAFT_01197 | Scaffold       | DRAFT_contig_70_139_len_25505_read_count_420782.23                                     |          |
| 2558670529 | DRAFT_01197 | Coordinates    | 15084..18026(-)                                                                        |          |
| 2558670529 | DRAFT_01197 | DNA_length     | 2943bp                                                                                 |          |
| 2558670529 | DRAFT_01197 | Protein_length | 980aa                                                                                  |          |
| 2558670529 | DRAFT_01197 | GC             |                                                                                        | 0.59     |
| 2558670529 | DRAFT_01197 | Transmembrane  | Yes                                                                                    |          |
|            |             |                |                                                                                        |          |
| 2558670530 | DRAFT_01198 | KEGG_module    | M00545: Trans-cinnamate degradation, trans-cinnamate => 2-oxopent-4-enoate + fumarate  |          |
| 2558670530 | DRAFT_01198 | KEGG_module    | M00543: Biphenyl degradation, biphenyl => 2-oxopent-4-enoate + benzoate                |          |
| 2558670530 | DRAFT_01198 | KEGG_module    | M00539: Cumate degradation, p-cumate => 2-oxopent-4-enoate + 2-methylpropanoate        |          |
| 2558670530 | DRAFT_01198 | KEGG_module    | M00547: Benzene/toluene degradation, benzene => catechol / toluene => 3-methylcatechol |          |
| 2558670530 | DRAFT_01198 | COG_category   | [P] Inorganic ion transport and metabolism                                             |          |
| 2558670530 | DRAFT_01198 | COG_category   | [R] General function prediction only                                                   |          |
| 2558670530 | DRAFT_01198 | COG2146        | Ferredoxin subunits of nitrite reductase and ring-hydroxylating dioxyge                | 3.00E-16 |

|            |             |                |                                                                        |          |
|------------|-------------|----------------|------------------------------------------------------------------------|----------|
| 2558670530 | DRAFT_01198 | pfam00355      | Rieske                                                                 | 1.70E-13 |
| 2558670530 | DRAFT_01198 | KO:K05710      | dioxygenase ferredoxin subunit                                         | 1.30E-14 |
| 2558670530 | DRAFT_01198 | Locus_type     | CDS                                                                    |          |
| 2558670530 | DRAFT_01198 | Product_name   | Ferredoxin subunits of nitrite reductase and ring-hydroxylating dioxyg |          |
| 2558670530 | DRAFT_01198 | Scaffold       | DRAFT_contig_70_139_len_25505_read_count_420782.23                     |          |
| 2558670530 | DRAFT_01198 | Coordinates    | 18089..18400(-)                                                        |          |
| 2558670530 | DRAFT_01198 | DNA_length     | 312bp                                                                  |          |
| 2558670530 | DRAFT_01198 | Protein_length | 103aa                                                                  |          |
| 2558670530 | DRAFT_01198 | GC             |                                                                        | 0.57     |
| 2558670531 | DRAFT_01199 | pfam00483      | NTP_transferase                                                        | 6.70E-31 |
| 2558670531 | DRAFT_01199 | Locus_type     | CDS                                                                    |          |
| 2558670531 | DRAFT_01199 | Product_name   | Nucleoside-diphosphate-sugar pyrophosphorylase involved in lipopol     |          |
| 2558670531 | DRAFT_01199 | Scaffold       | DRAFT_contig_70_139_len_25505_read_count_420782.23                     |          |
| 2558670531 | DRAFT_01199 | Coordinates    | 18439..19134(-)                                                        |          |
| 2558670531 | DRAFT_01199 | DNA_length     | 696bp                                                                  |          |
| 2558670531 | DRAFT_01199 | Protein_length | 231aa                                                                  |          |
| 2558670531 | DRAFT_01199 | GC             |                                                                        | 0.57     |
| 2558670532 | DRAFT_01200 | Locus_type     | CDS                                                                    |          |
| 2558670532 | DRAFT_01200 | Product_name   | hypothetical protein                                                   |          |
| 2558670532 | DRAFT_01200 | Scaffold       | DRAFT_contig_70_139_len_25505_read_count_420782.23                     |          |
| 2558670532 | DRAFT_01200 | Coordinates    | 19364..19798(-)                                                        |          |
| 2558670532 | DRAFT_01200 | DNA_length     | 435bp                                                                  |          |
| 2558670532 | DRAFT_01200 | Protein_length | 144aa                                                                  |          |
| 2558670532 | DRAFT_01200 | GC             |                                                                        | 0.53     |
| 2558670532 | DRAFT_01200 | Transmembrane  | Yes                                                                    |          |
| 2558670533 | DRAFT_01201 | Locus_type     | CDS                                                                    |          |
| 2558670533 | DRAFT_01201 | Product_name   | hypothetical protein                                                   |          |
| 2558670533 | DRAFT_01201 | Scaffold       | DRAFT_contig_70_139_len_25505_read_count_420782.23                     |          |
| 2558670533 | DRAFT_01201 | Coordinates    | 19937..20350(-)                                                        |          |
| 2558670533 | DRAFT_01201 | DNA_length     | 414bp                                                                  |          |
| 2558670533 | DRAFT_01201 | Protein_length | 137aa                                                                  |          |

|            |             |                |                                                    |          |
|------------|-------------|----------------|----------------------------------------------------|----------|
| 2558670533 | DRAFT_01201 | GC             |                                                    | 0.5      |
| 2558670533 | DRAFT_01201 | Transmembrane  | Yes                                                |          |
| 2558670534 | DRAFT_01202 | Locus_type     | CDS                                                |          |
| 2558670534 | DRAFT_01202 | Product_name   | hypothetical protein                               |          |
| 2558670534 | DRAFT_01202 | Scaffold       | DRAFT_contig_70_139_len_25505_read_count_420782.23 |          |
| 2558670534 | DRAFT_01202 | Coordinates    | 20355..20486(-)                                    |          |
| 2558670534 | DRAFT_01202 | DNA_length     | 132bp                                              |          |
| 2558670534 | DRAFT_01202 | Protein_length | 43aa                                               |          |
| 2558670534 | DRAFT_01202 | GC             |                                                    | 0.52     |
| 2558670535 | DRAFT_01203 | COG_category   | [L] Replication, recombination and repair          |          |
| 2558670535 | DRAFT_01203 | COG3316        | Transposase and inactivated derivatives            | 6.00E-17 |
| 2558670535 | DRAFT_01203 | pfam13610      | DDE_Tnp_IS240                                      | 7.30E-24 |
| 2558670535 | DRAFT_01203 | Locus_type     | CDS                                                |          |
| 2558670535 | DRAFT_01203 | Product_name   | Transposase and inactivated derivatives            |          |
| 2558670535 | DRAFT_01203 | Scaffold       | DRAFT_contig_70_139_len_25505_read_count_420782.23 |          |
| 2558670535 | DRAFT_01203 | Coordinates    | 20555..21778(+)                                    |          |
| 2558670535 | DRAFT_01203 | DNA_length     | 1224bp                                             |          |
| 2558670535 | DRAFT_01203 | Protein_length | 407aa                                              |          |
| 2558670535 | DRAFT_01203 | GC             |                                                    | 0.55     |
| 2558670536 | DRAFT_01204 | Locus_type     | CDS                                                |          |
| 2558670536 | DRAFT_01204 | Product_name   | hypothetical protein                               |          |
| 2558670536 | DRAFT_01204 | Scaffold       | DRAFT_contig_70_139_len_25505_read_count_420782.23 |          |
| 2558670536 | DRAFT_01204 | Coordinates    | 21750..21959(-)                                    |          |
| 2558670536 | DRAFT_01204 | DNA_length     | 210bp                                              |          |
| 2558670536 | DRAFT_01204 | Protein_length | 69aa                                               |          |
| 2558670536 | DRAFT_01204 | GC             |                                                    | 0.52     |
| 2558670537 | DRAFT_01205 | Locus_type     | CDS                                                |          |
| 2558670537 | DRAFT_01205 | Product_name   | hypothetical protein                               |          |
| 2558670537 | DRAFT_01205 | Scaffold       | DRAFT_contig_70_139_len_25505_read_count_420782.23 |          |
| 2558670537 | DRAFT_01205 | Coordinates    | 22024..22290(-)                                    |          |

|            |             |                |                                                    |          |
|------------|-------------|----------------|----------------------------------------------------|----------|
| 2558670537 | DRAFT_01205 | DNA_length     | 267bp                                              |          |
| 2558670537 | DRAFT_01205 | Protein_length | 88aa                                               |          |
| 2558670537 | DRAFT_01205 | GC             |                                                    | 0.57     |
| 2558670537 | DRAFT_01205 | Transmembrane  | Yes                                                |          |
| 2558670538 | DRAFT_01206 | Locus_type     | CDS                                                |          |
| 2558670538 | DRAFT_01206 | Product_name   | hypothetical protein                               |          |
| 2558670538 | DRAFT_01206 | Scaffold       | DRAFT_contig_70_139_len_25505_read_count_420782.23 |          |
| 2558670538 | DRAFT_01206 | Coordinates    | 22343..24739(-)                                    |          |
| 2558670538 | DRAFT_01206 | DNA_length     | 2397bp                                             |          |
| 2558670538 | DRAFT_01206 | Protein_length | 798aa                                              |          |
| 2558670538 | DRAFT_01206 | GC             |                                                    | 0.52     |
| 2558670538 | DRAFT_01206 | Transmembrane  | Yes                                                |          |
| 2558670539 | DRAFT_01207 | Locus_type     | CDS                                                |          |
| 2558670539 | DRAFT_01207 | Product_name   | hypothetical protein                               |          |
| 2558670539 | DRAFT_01207 | Scaffold       | DRAFT_contig_70_139_len_25505_read_count_420782.23 |          |
| 2558670539 | DRAFT_01207 | Coordinates    | 25277..25420(+)                                    |          |
| 2558670539 | DRAFT_01207 | DNA_length     | 144bp                                              |          |
| 2558670539 | DRAFT_01207 | Protein_length | 47aa                                               |          |
| 2558670539 | DRAFT_01207 | GC             |                                                    | 0.59     |
| 2558670540 | DRAFT_01208 | Locus_type     | CDS                                                |          |
| 2558670540 | DRAFT_01208 | Product_name   | hypothetical protein                               |          |
| 2558670540 | DRAFT_01208 | Scaffold       | DRAFT_contig_70_158_len_24011_read_count_400064.24 |          |
| 2558670540 | DRAFT_01208 | Coordinates    | 100..774(-)                                        |          |
| 2558670540 | DRAFT_01208 | DNA_length     | 675bp                                              |          |
| 2558670540 | DRAFT_01208 | Protein_length | 224aa                                              |          |
| 2558670540 | DRAFT_01208 | GC             |                                                    | 0.57     |
| 2558670540 | DRAFT_01208 | Transmembrane  | Yes                                                |          |
| 2558670541 | DRAFT_01209 | COG_category   | [S] Function unknown                               |          |
| 2558670541 | DRAFT_01209 | COG1814        | Uncharacterized membrane protein                   | 2.00E-14 |
| 2558670541 | DRAFT_01209 | pfam01988      | VIT1                                               | 9.70E-11 |

|            |             |                |                                                       |          |
|------------|-------------|----------------|-------------------------------------------------------|----------|
| 2558670541 | DRAFT_01209 | Locus_type     | CDS                                                   |          |
| 2558670541 | DRAFT_01209 | Product_name   | Uncharacterized membrane protein                      |          |
| 2558670541 | DRAFT_01209 | Scaffold       | DRAFT_contig_70_158_len_24011_read_count_400064.24    |          |
| 2558670541 | DRAFT_01209 | Coordinates    | 946..1839(-)                                          |          |
| 2558670541 | DRAFT_01209 | DNA_length     | 894bp                                                 |          |
| 2558670541 | DRAFT_01209 | Protein_length | 297aa                                                 |          |
| 2558670541 | DRAFT_01209 | GC             |                                                       | 0.56     |
| 2558670541 | DRAFT_01209 | Transmembrane  | Yes                                                   |          |
| 2558670542 | DRAFT_01210 | KEGG_module    | M00360: Aminoacyl-tRNA biosynthesis, prokaryotes      |          |
| 2558670542 | DRAFT_01210 | KEGG_module    | M00359: Aminoacyl-tRNA biosynthesis, eukaryotes       |          |
| 2558670542 | DRAFT_01210 | Metacyc        | TRNA-CHARGING-PWY: tRNA charging                      |          |
| 2558670542 | DRAFT_01210 | IMG_pathway    | 495: L-leucine ligation to tRNA(Leu)                  |          |
| 2558670542 | DRAFT_01210 | COG_category   | [J] Translation, ribosomal structure and biogenesis   |          |
| 2558670542 | DRAFT_01210 | COG0495        | Leucyl-tRNA synthetase                                | 0.00E+00 |
| 2558670542 | DRAFT_01210 | pfam00133      | tRNA-synt_1                                           | 8.80E-06 |
| 2558670542 | DRAFT_01210 | pfam00133      | tRNA-synt_1                                           | 4.60E-35 |
| 2558670542 | DRAFT_01210 | pfam09334      | tRNA-synt_1g                                          | 3.70E-08 |
| 2558670542 | DRAFT_01210 | pfam08264      | Anticodon_1                                           | 4.90E-21 |
| 2558670542 | DRAFT_01210 | EC:6.1.1.4     | Leucine--tRNA ligase.                                 |          |
| 2558670542 | DRAFT_01210 | TIGR00395      | leucyl-tRNA synthetase, archaeal and cytosolic family | 0.00E+00 |
| 2558670542 | DRAFT_01210 | KO:K01869      | leucyl-tRNA synthetase [EC:6.1.1.4]                   | 0.00E+00 |
| 2558670542 | DRAFT_01210 | ITERM:00405    | leucyl-tRNA synthetase (EC 6.1.1.4)                   |          |
| 2558670542 | DRAFT_01210 | Locus_type     | CDS                                                   |          |
| 2558670542 | DRAFT_01210 | Product_name   | leucyl-tRNA synthetase (EC 6.1.1.4)                   |          |
| 2558670542 | DRAFT_01210 | Scaffold       | DRAFT_contig_70_158_len_24011_read_count_400064.24    |          |
| 2558670542 | DRAFT_01210 | Coordinates    | 1939..4770(-)                                         |          |
| 2558670542 | DRAFT_01210 | DNA_length     | 2832bp                                                |          |
| 2558670542 | DRAFT_01210 | Protein_length | 943aa                                                 |          |
| 2558670542 | DRAFT_01210 | GC             |                                                       | 0.6      |
| 2558670543 | DRAFT_01211 | KEGG_module    | M00359: Aminoacyl-tRNA biosynthesis, eukaryotes       |          |
| 2558670543 | DRAFT_01211 | KEGG_module    | M00360: Aminoacyl-tRNA biosynthesis, prokaryotes      |          |
| 2558670543 | DRAFT_01211 | Metacyc        | TRNA-CHARGING-PWY: tRNA charging                      |          |

|            |             |                |                                                     |          |
|------------|-------------|----------------|-----------------------------------------------------|----------|
| 2558670543 | DRAFT_01211 | IMG_pathway    | 487: L-alanine ligation to tRNA(Ala)                |          |
| 2558670543 | DRAFT_01211 | COG_category   | [J] Translation, ribosomal structure and biogenesis |          |
| 2558670543 | DRAFT_01211 | COG0013        | Alanyl-tRNA synthetase                              | 0.00E+00 |
| 2558670543 | DRAFT_01211 | pfam02272      | DHHA1                                               | 1.30E-04 |
| 2558670543 | DRAFT_01211 | pfam07973      | tRNA_SAD                                            | 5.50E-14 |
| 2558670543 | DRAFT_01211 | pfam01411      | tRNA-synt_2c                                        | 2.70E-79 |
| 2558670543 | DRAFT_01211 | EC:6.1.1.7     | Alanine--tRNA ligase.                               |          |
| 2558670543 | DRAFT_01211 | TIGR00344      | alanine--tRNA ligase                                | 0.00E+00 |
| 2558670543 | DRAFT_01211 | TIGR03683      | alanyl-tRNA synthetase                              | 0.00E+00 |
| 2558670543 | DRAFT_01211 | KO:K01872      | alanyl-tRNA synthetase [EC:6.1.1.7]                 | 0.00E+00 |
| 2558670543 | DRAFT_01211 | ITERM:00391    | alanyl-tRNA synthetase (EC 6.1.1.7)                 |          |
| 2558670543 | DRAFT_01211 | Locus_type     | CDS                                                 |          |
| 2558670543 | DRAFT_01211 | Product_name   | alanyl-tRNA synthetase (EC 6.1.1.7)                 |          |
| 2558670543 | DRAFT_01211 | Scaffold       | DRAFT_contig_70_158_len_24011_read_count_400064.24  |          |
| 2558670543 | DRAFT_01211 | Coordinates    | 4767..7598(-)                                       |          |
| 2558670543 | DRAFT_01211 | DNA_length     | 2832bp                                              |          |
| 2558670543 | DRAFT_01211 | Protein_length | 943aa                                               |          |
| 2558670543 | DRAFT_01211 | GC             |                                                     | 0.57     |
| 2558670544 | DRAFT_01212 | KEGG_module    | M00179: Ribosome, archaea                           |          |
| 2558670544 | DRAFT_01212 | COG_category   | [J] Translation, ribosomal structure and biogenesis |          |
| 2558670544 | DRAFT_01212 | COG2058        | Ribosomal protein L12E/L44/L45/RPP1/RPP2            | 1.00E-10 |
| 2558670544 | DRAFT_01212 | pfam00428      | Ribosomal_60s                                       | 1.80E-15 |
| 2558670544 | DRAFT_01212 | TIGR03685      | 50S ribosomal protein L12P                          | 5.90E-37 |
| 2558670544 | DRAFT_01212 | KO:K02869      | large subunit ribosomal protein L12                 | 2.80E-28 |
| 2558670544 | DRAFT_01212 | Locus_type     | CDS                                                 |          |
| 2558670544 | DRAFT_01212 | Product_name   | 50S ribosomal protein L12P                          |          |
| 2558670544 | DRAFT_01212 | Scaffold       | DRAFT_contig_70_158_len_24011_read_count_400064.24  |          |
| 2558670544 | DRAFT_01212 | Coordinates    | 7733..8098(+)                                       |          |
| 2558670544 | DRAFT_01212 | DNA_length     | 366bp                                               |          |
| 2558670544 | DRAFT_01212 | Protein_length | 121aa                                               |          |
| 2558670544 | DRAFT_01212 | GC             |                                                     | 0.59     |
| 2558670545 | DRAFT_01213 | KEGG_module    | M00178: Ribosome, bacteria                          |          |

|            |             |                |                                                     |          |
|------------|-------------|----------------|-----------------------------------------------------|----------|
| 2558670545 | DRAFT_01213 | KEGG_module    | M00179: Ribosome, archaea                           |          |
| 2558670545 | DRAFT_01213 | COG_category   | [J] Translation, ribosomal structure and biogenesis |          |
| 2558670545 | DRAFT_01213 | COG0244        | Ribosomal protein L10                               | 1.00E-19 |
| 2558670545 | DRAFT_01213 | pfam00466      | Ribosomal_L10                                       | 1.80E-20 |
| 2558670545 | DRAFT_01213 | KO:K02864      | large subunit ribosomal protein L10                 | 0.00E+00 |
| 2558670545 | DRAFT_01213 | ITERM:00276    | LSU ribosomal protein L10P                          |          |
| 2558670545 | DRAFT_01213 | Locus_type     | CDS                                                 |          |
| 2558670545 | DRAFT_01213 | Product_name   | LSU ribosomal protein L10P                          |          |
| 2558670545 | DRAFT_01213 | Scaffold       | DRAFT_contig_70_158_len_24011_read_count_400064.24  |          |
| 2558670545 | DRAFT_01213 | Coordinates    | 8117..8989(-)                                       |          |
| 2558670545 | DRAFT_01213 | DNA_length     | 873bp                                               |          |
| 2558670545 | DRAFT_01213 | Protein_length | 290aa                                               |          |
| 2558670545 | DRAFT_01213 | GC             |                                                     | 0.6      |
| 2558670546 | DRAFT_01214 | KEGG_module    | M00178: Ribosome, bacteria                          |          |
| 2558670546 | DRAFT_01214 | KEGG_module    | M00179: Ribosome, archaea                           |          |
| 2558670546 | DRAFT_01214 | COG_category   | [J] Translation, ribosomal structure and biogenesis |          |
| 2558670546 | DRAFT_01214 | COG0081        | Ribosomal protein L1                                | 1.00E-32 |
| 2558670546 | DRAFT_01214 | pfam00687      | Ribosomal_L1                                        | 3.70E-42 |
| 2558670546 | DRAFT_01214 | KO:K02863      | large subunit ribosomal protein L1                  | 0.00E+00 |
| 2558670546 | DRAFT_01214 | Locus_type     | CDS                                                 |          |
| 2558670546 | DRAFT_01214 | Product_name   | Ribosomal protein L1                                |          |
| 2558670546 | DRAFT_01214 | Scaffold       | DRAFT_contig_70_158_len_24011_read_count_400064.24  |          |
| 2558670546 | DRAFT_01214 | Coordinates    | 8991..9641(-)                                       |          |
| 2558670546 | DRAFT_01214 | DNA_length     | 651bp                                               |          |
| 2558670546 | DRAFT_01214 | Protein_length | 216aa                                               |          |
| 2558670546 | DRAFT_01214 | GC             |                                                     | 0.6      |
| 2558670547 | DRAFT_01215 | KEGG_module    | M00179: Ribosome, archaea                           |          |
| 2558670547 | DRAFT_01215 | KEGG_module    | M00178: Ribosome, bacteria                          |          |
| 2558670547 | DRAFT_01215 | COG_category   | [J] Translation, ribosomal structure and biogenesis |          |
| 2558670547 | DRAFT_01215 | COG0080        | Ribosomal protein L11                               | 3.00E-36 |
| 2558670547 | DRAFT_01215 | pfam00298      | Ribosomal_L11                                       | 4.50E-19 |
| 2558670547 | DRAFT_01215 | pfam03946      | Ribosomal_L11_N                                     | 9.80E-22 |

|            |             |                |                                                                   |          |
|------------|-------------|----------------|-------------------------------------------------------------------|----------|
| 2558670547 | DRAFT_01215 | KO:K02867      | large subunit ribosomal protein L11                               | 0.00E+00 |
| 2558670547 | DRAFT_01215 | Locus_type     | CDS                                                               |          |
| 2558670547 | DRAFT_01215 | Product_name   | LSU ribosomal protein L11P                                        |          |
| 2558670547 | DRAFT_01215 | Scaffold       | DRAFT_contig_70_158_len_24011_read_count_400064.24                |          |
| 2558670547 | DRAFT_01215 | Coordinates    | 9710..10192(-)                                                    |          |
| 2558670547 | DRAFT_01215 | DNA_length     | 483bp                                                             |          |
| 2558670547 | DRAFT_01215 | Protein_length | 160aa                                                             |          |
| 2558670547 | DRAFT_01215 | GC             |                                                                   | 0.59     |
| 2558670548 | DRAFT_01216 | COG_category   | [K] Transcription                                                 |          |
| 2558670548 | DRAFT_01216 | COG0250        | Transcription antiterminator                                      | 1.00E-11 |
| 2558670548 | DRAFT_01216 | pfam00467      | KOW                                                               | 2.40E-07 |
| 2558670548 | DRAFT_01216 | pfam03439      | Spt5-NGN                                                          | 4.10E-20 |
| 2558670548 | DRAFT_01216 | TIGR00405      | ribosomal protein L24p/L26e, archaeal                             | 2.00E-41 |
| 2558670548 | DRAFT_01216 | KO:K02601      | transcriptional antiterminator NusG                               | 1.90E-32 |
| 2558670548 | DRAFT_01216 | Locus_type     | CDS                                                               |          |
| 2558670548 | DRAFT_01216 | Product_name   | ribosomal protein L24p/L26e, archaeal                             |          |
| 2558670548 | DRAFT_01216 | Scaffold       | DRAFT_contig_70_158_len_24011_read_count_400064.24                |          |
| 2558670548 | DRAFT_01216 | Coordinates    | 10389..10880(-)                                                   |          |
| 2558670548 | DRAFT_01216 | DNA_length     | 492bp                                                             |          |
| 2558670548 | DRAFT_01216 | Protein_length | 163aa                                                             |          |
| 2558670548 | DRAFT_01216 | GC             |                                                                   | 0.58     |
| 2558670549 | DRAFT_01217 | COG_category   | [U] Intracellular trafficking, secretion, and vesicular transport |          |
| 2558670549 | DRAFT_01217 | COG2443        | Preprotein translocase subunit Sss1                               | 4.00E-06 |
| 2558670549 | DRAFT_01217 | TIGR00327      | protein translocase SEC61 complex gamma subunit, archaeal and euk | 5.20E-15 |
| 2558670549 | DRAFT_01217 | Locus_type     | CDS                                                               |          |
| 2558670549 | DRAFT_01217 | Product_name   | protein translocase SEC61 complex gamma subunit, archaeal and euk |          |
| 2558670549 | DRAFT_01217 | Scaffold       | DRAFT_contig_70_158_len_24011_read_count_400064.24                |          |
| 2558670549 | DRAFT_01217 | Coordinates    | 10942..11109(-)                                                   |          |
| 2558670549 | DRAFT_01217 | DNA_length     | 168bp                                                             |          |
| 2558670549 | DRAFT_01217 | Protein_length | 55aa                                                              |          |
| 2558670549 | DRAFT_01217 | GC             |                                                                   | 0.5      |
| 2558670549 | DRAFT_01217 | Transmembrane  | Yes                                                               |          |



|            |             |                |                                                                       |          |
|------------|-------------|----------------|-----------------------------------------------------------------------|----------|
| 2558670550 | DRAFT_01218 | COG_category   | [S] Function unknown                                                  |          |
| 2558670550 | DRAFT_01218 | COG1650        | Uncharacterized protein conserved in archaea                          | 3.00E-53 |
| 2558670550 | DRAFT_01218 | pfam04414      | tRNA_deacylase                                                        | 3.00E-61 |
| 2558670550 | DRAFT_01218 | KO:K09716      | hypothetical protein                                                  | 0.00E+00 |
| 2558670550 | DRAFT_01218 | Locus_type     | CDS                                                                   |          |
| 2558670550 | DRAFT_01218 | Product_name   | Uncharacterized protein conserved in archaea                          |          |
| 2558670550 | DRAFT_01218 | Scaffold       | DRAFT_contig_70_158_len_24011_read_count_400064.24                    |          |
| 2558670550 | DRAFT_01218 | Coordinates    | 11215..12042(+)                                                       |          |
| 2558670550 | DRAFT_01218 | DNA_length     | 828bp                                                                 |          |
| 2558670550 | DRAFT_01218 | Protein_length | 275aa                                                                 |          |
| 2558670550 | DRAFT_01218 | GC             |                                                                       | 0.59     |
| 2558670551 | DRAFT_01219 | KEGG_module    | M00335: Sec (secretion) system                                        |          |
| 2558670551 | DRAFT_01219 | COG_category   | [U] Intracellular trafficking, secretion, and vesicular transport     |          |
| 2558670551 | DRAFT_01219 | COG0552        | Signal recognition particle GTPase                                    | 8.00E-80 |
| 2558670551 | DRAFT_01219 | pfam00448      | SRP54                                                                 | 5.20E-69 |
| 2558670551 | DRAFT_01219 | pfam02881      | SRP54_N                                                               | 1.00E-05 |
| 2558670551 | DRAFT_01219 | TIGR00064      | signal recognition particle-docking protein FtsY                      | 3.60E-93 |
| 2558670551 | DRAFT_01219 | KO:K03110      | fused signal recognition particle receptor                            | 0.00E+00 |
| 2558670551 | DRAFT_01219 | Locus_type     | CDS                                                                   |          |
| 2558670551 | DRAFT_01219 | Product_name   | signal recognition particle-docking protein FtsY                      |          |
| 2558670551 | DRAFT_01219 | Scaffold       | DRAFT_contig_70_158_len_24011_read_count_400064.24                    |          |
| 2558670551 | DRAFT_01219 | Coordinates    | 12119..13030(-)                                                       |          |
| 2558670551 | DRAFT_01219 | DNA_length     | 912bp                                                                 |          |
| 2558670551 | DRAFT_01219 | Protein_length | 303aa                                                                 |          |
| 2558670551 | DRAFT_01219 | GC             |                                                                       | 0.6      |
| 2558670552 | DRAFT_01220 | COG_category   | [O] Posttranslational modification, protein turnover, chaperones      |          |
| 2558670552 | DRAFT_01220 | COG1730        | Predicted prefoldin, molecular chaperone implicated in de novo protei | 2.00E-08 |
| 2558670552 | DRAFT_01220 | pfam02996      | Prefoldin                                                             | 1.60E-14 |
| 2558670552 | DRAFT_01220 | TIGR00293      | prefoldin, archaeal alpha subunit/eukaryotic subunit 5                | 2.00E-19 |
| 2558670552 | DRAFT_01220 | KO:K04797      | prefoldin alpha subunit                                               | 2.80E-11 |
| 2558670552 | DRAFT_01220 | Locus_type     | CDS                                                                   |          |

|            |             |                |                                                        |          |
|------------|-------------|----------------|--------------------------------------------------------|----------|
| 2558670552 | DRAFT_01220 | Product_name   | prefoldin, archaeal alpha subunit/eukaryotic subunit 5 |          |
| 2558670552 | DRAFT_01220 | Scaffold       | DRAFT_contig_70_158_len_24011_read_count_400064.24     |          |
| 2558670552 | DRAFT_01220 | Coordinates    | 13038..13469(-)                                        |          |
| 2558670552 | DRAFT_01220 | DNA_length     | 432bp                                                  |          |
| 2558670552 | DRAFT_01220 | Protein_length | 143aa                                                  |          |
| 2558670552 | DRAFT_01220 | GC             |                                                        | 0.63     |
|            |             |                |                                                        |          |
| 2558670553 | DRAFT_01221 | COG_category   | [J] Translation, ribosomal structure and biogenesis    |          |
| 2558670553 | DRAFT_01221 | COG1976        | Translation initiation factor 6 (eIF-6)                | 7.00E-51 |
| 2558670553 | DRAFT_01221 | pfam01912      | eIF-6                                                  | 5.00E-62 |
| 2558670553 | DRAFT_01221 | TIGR00323      | translation initiation factor eIF-6, putative          | 5.40E-59 |
| 2558670553 | DRAFT_01221 | KO:K03264      | translation initiation factor 6                        | 0.00E+00 |
| 2558670553 | DRAFT_01221 | ITERM:01949    | translation initiation factor 6 (aeIF-6)               |          |
| 2558670553 | DRAFT_01221 | Locus_type     | CDS                                                    |          |
| 2558670553 | DRAFT_01221 | Product_name   | translation initiation factor 6 (aeIF-6)               |          |
| 2558670553 | DRAFT_01221 | Scaffold       | DRAFT_contig_70_158_len_24011_read_count_400064.24     |          |
| 2558670553 | DRAFT_01221 | Coordinates    | 13489..14154(-)                                        |          |
| 2558670553 | DRAFT_01221 | DNA_length     | 666bp                                                  |          |
| 2558670553 | DRAFT_01221 | Protein_length | 221aa                                                  |          |
| 2558670553 | DRAFT_01221 | GC             |                                                        | 0.6      |
|            |             |                |                                                        |          |
| 2558670554 | DRAFT_01222 | KEGG_module    | M00179: Ribosome, archaea                              |          |
| 2558670554 | DRAFT_01222 | KEGG_module    | M00177: Ribosome, eukaryotes                           |          |
| 2558670554 | DRAFT_01222 | COG_category   | [J] Translation, ribosomal structure and biogenesis    |          |
| 2558670554 | DRAFT_01222 | COG2097        | Ribosomal protein L31E                                 | 6.00E-14 |
| 2558670554 | DRAFT_01222 | pfam01198      | Ribosomal_L31e                                         | 4.10E-22 |
| 2558670554 | DRAFT_01222 | KO:K02910      | large subunit ribosomal protein L31e                   | 7.80E-13 |
| 2558670554 | DRAFT_01222 | Locus_type     | CDS                                                    |          |
| 2558670554 | DRAFT_01222 | Product_name   | Ribosomal protein L31E                                 |          |
| 2558670554 | DRAFT_01222 | Scaffold       | DRAFT_contig_70_158_len_24011_read_count_400064.24     |          |
| 2558670554 | DRAFT_01222 | Coordinates    | 14158..14451(-)                                        |          |
| 2558670554 | DRAFT_01222 | DNA_length     | 294bp                                                  |          |
| 2558670554 | DRAFT_01222 | Protein_length | 97aa                                                   |          |
| 2558670554 | DRAFT_01222 | GC             |                                                        | 0.56     |

|            |             |                |                                                     |          |
|------------|-------------|----------------|-----------------------------------------------------|----------|
| 2558670555 | DRAFT_01223 | KEGG_module    | M00177: Ribosome, eukaryotes                        |          |
| 2558670555 | DRAFT_01223 | KEGG_module    | M00179: Ribosome, archaea                           |          |
| 2558670555 | DRAFT_01223 | pfam00832      | Ribosomal_L39                                       | 2.50E-14 |
| 2558670555 | DRAFT_01223 | KO:K02924      | large subunit ribosomal protein L39e                | 2.40E-08 |
| 2558670555 | DRAFT_01223 | ITERM:00272    | LSU ribosomal protein L39E                          |          |
| 2558670555 | DRAFT_01223 | Locus_type     | CDS                                                 |          |
| 2558670555 | DRAFT_01223 | Product_name   | LSU ribosomal protein L39E                          |          |
| 2558670555 | DRAFT_01223 | Scaffold       | DRAFT_contig_70_158_len_24011_read_count_400064.24  |          |
| 2558670555 | DRAFT_01223 | Coordinates    | 14458..14616(-)                                     |          |
| 2558670555 | DRAFT_01223 | DNA_length     | 159bp                                               |          |
| 2558670555 | DRAFT_01223 | Protein_length | 52aa                                                |          |
| 2558670555 | DRAFT_01223 | GC             |                                                     | 0.55     |
|            |             |                |                                                     |          |
| 2558670556 | DRAFT_01224 | pfam01984      | dsDNA_bind                                          | 5.90E-22 |
| 2558670556 | DRAFT_01224 | KO:K06875      | programmed cell death protein 5                     | 2.20E-17 |
| 2558670556 | DRAFT_01224 | ITERM:01948    | DNA-binding TFAR19-related protein                  |          |
| 2558670556 | DRAFT_01224 | Locus_type     | CDS                                                 |          |
| 2558670556 | DRAFT_01224 | Product_name   | DNA-binding TFAR19-related protein                  |          |
| 2558670556 | DRAFT_01224 | Scaffold       | DRAFT_contig_70_158_len_24011_read_count_400064.24  |          |
| 2558670556 | DRAFT_01224 | Coordinates    | 14618..14893(-)                                     |          |
| 2558670556 | DRAFT_01224 | DNA_length     | 276bp                                               |          |
| 2558670556 | DRAFT_01224 | Protein_length | 91aa                                                |          |
| 2558670556 | DRAFT_01224 | GC             |                                                     | 0.59     |
|            |             |                |                                                     |          |
| 2558670557 | DRAFT_01225 | KEGG_module    | M00177: Ribosome, eukaryotes                        |          |
| 2558670557 | DRAFT_01225 | KEGG_module    | M00179: Ribosome, archaea                           |          |
| 2558670557 | DRAFT_01225 | COG_category   | [J] Translation, ribosomal structure and biogenesis |          |
| 2558670557 | DRAFT_01225 | COG2238        | Ribosomal protein S19E (S16A)                       | 2.00E-45 |
| 2558670557 | DRAFT_01225 | pfam01090      | Ribosomal_S19e                                      | 8.40E-49 |
| 2558670557 | DRAFT_01225 | KO:K02966      | small subunit ribosomal protein S19e                | 2.30E-40 |
| 2558670557 | DRAFT_01225 | Locus_type     | CDS                                                 |          |
| 2558670557 | DRAFT_01225 | Product_name   | Ribosomal protein S19E (S16A)                       |          |
| 2558670557 | DRAFT_01225 | Scaffold       | DRAFT_contig_70_158_len_24011_read_count_400064.24  |          |

|            |             |                |                                                     |          |
|------------|-------------|----------------|-----------------------------------------------------|----------|
| 2558670557 | DRAFT_01225 | Coordinates    | 14896..15348(-)                                     |          |
| 2558670557 | DRAFT_01225 | DNA_length     | 453bp                                               |          |
| 2558670557 | DRAFT_01225 | Protein_length | 150aa                                               |          |
| 2558670557 | DRAFT_01225 | GC             |                                                     | 0.61     |
| 2558670558 | DRAFT_01226 | Metacyc        | PWY0-1479: tRNA processing                          |          |
| 2558670558 | DRAFT_01226 | COG_category   | [J] Translation, ribosomal structure and biogenesis |          |
| 2558670558 | DRAFT_01226 | COG2023        | RNase P subunit RPR2                                | 9.00E-10 |
| 2558670558 | DRAFT_01226 | pfam04032      | Rpr2                                                | 3.40E-13 |
| 2558670558 | DRAFT_01226 | EC:3.1.26.5    | Ribonuclease P.                                     |          |
| 2558670558 | DRAFT_01226 | KO:K03540      | ribonuclease P protein subunit RPR2 [EC:3.1.26.5]   | 1.00E-12 |
| 2558670558 | DRAFT_01226 | Locus_type     | CDS                                                 |          |
| 2558670558 | DRAFT_01226 | Product_name   | RNase P subunit RPR2                                |          |
| 2558670558 | DRAFT_01226 | Scaffold       | DRAFT_contig_70_158_len_24011_read_count_400064.24  |          |
| 2558670558 | DRAFT_01226 | Coordinates    | 15355..15735(-)                                     |          |
| 2558670558 | DRAFT_01226 | DNA_length     | 381bp                                               |          |
| 2558670558 | DRAFT_01226 | Protein_length | 126aa                                               |          |
| 2558670558 | DRAFT_01226 | GC             |                                                     | 0.61     |
| 2558670559 | DRAFT_01227 | COG_category   | [S] Function unknown                                |          |
| 2558670559 | DRAFT_01227 | COG1756        | Uncharacterized conserved protein                   | 3.00E-44 |
| 2558670559 | DRAFT_01227 | pfam03587      | EMG1                                                | 1.90E-38 |
| 2558670559 | DRAFT_01227 | KO:K14568      | essential for mitotic growth 1                      | 4.20E-45 |
| 2558670559 | DRAFT_01227 | Locus_type     | CDS                                                 |          |
| 2558670559 | DRAFT_01227 | Product_name   | Uncharacterized conserved protein                   |          |
| 2558670559 | DRAFT_01227 | Scaffold       | DRAFT_contig_70_158_len_24011_read_count_400064.24  |          |
| 2558670559 | DRAFT_01227 | Coordinates    | 15769..16434(+)                                     |          |
| 2558670559 | DRAFT_01227 | DNA_length     | 666bp                                               |          |
| 2558670559 | DRAFT_01227 | Protein_length | 221aa                                               |          |
| 2558670559 | DRAFT_01227 | GC             |                                                     | 0.64     |
| 2558670560 | DRAFT_01228 | Locus_type     | CDS                                                 |          |
| 2558670560 | DRAFT_01228 | Product_name   | hypothetical protein                                |          |
| 2558670560 | DRAFT_01228 | Scaffold       | DRAFT_contig_70_158_len_24011_read_count_400064.24  |          |

|            |             |                |                                                                                |          |
|------------|-------------|----------------|--------------------------------------------------------------------------------|----------|
| 2558670560 | DRAFT_01228 | Coordinates    | 16742..17083(+)                                                                |          |
| 2558670560 | DRAFT_01228 | DNA_length     | 342bp                                                                          |          |
| 2558670560 | DRAFT_01228 | Protein_length | 113aa                                                                          |          |
| 2558670560 | DRAFT_01228 | GC             |                                                                                | 0.52     |
| 2558670561 | DRAFT_01229 | pfam12847      | Methyltransf_18                                                                | 2.80E-15 |
| 2558670561 | DRAFT_01229 | Locus_type     | CDS                                                                            |          |
| 2558670561 | DRAFT_01229 | Product_name   | Methyltransferase domain                                                       |          |
| 2558670561 | DRAFT_01229 | Scaffold       | DRAFT_contig_70_158_len_24011_read_count_400064.24                             |          |
| 2558670561 | DRAFT_01229 | Coordinates    | 17416..18276(+)                                                                |          |
| 2558670561 | DRAFT_01229 | DNA_length     | 861bp                                                                          |          |
| 2558670561 | DRAFT_01229 | Protein_length | 286aa                                                                          |          |
| 2558670561 | DRAFT_01229 | GC             |                                                                                | 0.51     |
| 2558670562 | DRAFT_01230 | Metacyc        | PWY-6575: juvenile hormone III biosynthesis I                                  |          |
| 2558670562 | DRAFT_01230 | Metacyc        | PWY-6147: 6-hydroxymethyl-dihydropterin diphosphate biosynthesis I             |          |
| 2558670562 | DRAFT_01230 | Metacyc        | PWY-7206: pyrimidine deoxyribonucleotides dephosphorylation                    |          |
| 2558670562 | DRAFT_01230 | Metacyc        | PWY-6502: oxidized GTP and dGTP detoxification                                 |          |
| 2558670562 | DRAFT_01230 | Metacyc        | PWY-6797: 6-hydroxymethyl-dihydropterin diphosphate biosynthesis II (archaea)  |          |
| 2558670562 | DRAFT_01230 | Metacyc        | PWY-6383: mono-<i>trans</i>, poly-<i>cis</i> decaprenyl phosphate biosynthesis |          |
| 2558670562 | DRAFT_01230 | COG_category   | [F] Nucleotide transport and metabolism                                        |          |
| 2558670562 | DRAFT_01230 | COG1051        | ADP-ribose pyrophosphatase                                                     | 1.00E-10 |
| 2558670562 | DRAFT_01230 | pfam00293      | NUDIX                                                                          | 5.80E-22 |
| 2558670562 | DRAFT_01230 | EC:3.6.1.-     | Hydrolases. Acting on acid anhydrides. In phosphorous-containing anhydrides.   |          |
| 2558670562 | DRAFT_01230 | KO:K03574      | 7,8-dihydro-8-oxoguanine triphosphatase [EC:3.6.1.-]                           | 2.80E-11 |
| 2558670562 | DRAFT_01230 | Locus_type     | CDS                                                                            |          |
| 2558670562 | DRAFT_01230 | Product_name   | ADP-ribose pyrophosphatase                                                     |          |
| 2558670562 | DRAFT_01230 | Scaffold       | DRAFT_contig_70_158_len_24011_read_count_400064.24                             |          |
| 2558670562 | DRAFT_01230 | Coordinates    | 18284..18709(+)                                                                |          |
| 2558670562 | DRAFT_01230 | DNA_length     | 426bp                                                                          |          |
| 2558670562 | DRAFT_01230 | Protein_length | 141aa                                                                          |          |
| 2558670562 | DRAFT_01230 | GC             |                                                                                | 0.56     |
| 2558670563 | DRAFT_01231 | Metacyc        | NAD-BIOSYNTHESIS-III: NAD biosynthesis III                                     |          |

|            |             |                |                                                           |          |
|------------|-------------|----------------|-----------------------------------------------------------|----------|
| 2558670563 | DRAFT_01231 | Metacyc        | PWY30-4106: NAD salvage pathway III                       |          |
| 2558670563 | DRAFT_01231 | COG_category   | [H] Coenzyme transport and metabolism                     |          |
| 2558670563 | DRAFT_01231 | COG1056        | Nicotinamide mononucleotide adenylyltransferase           | 1.00E-19 |
| 2558670563 | DRAFT_01231 | pfam01467      | CTP_transf_2                                              | 6.60E-13 |
| 2558670563 | DRAFT_01231 | EC:2.7.7.1     | Nicotinamide-nucleotide adenylyltransferase.              |          |
| 2558670563 | DRAFT_01231 | TIGR00125      | cytidyltransferase-like domain                            | 5.10E-18 |
| 2558670563 | DRAFT_01231 | TIGR01527      | nicotinamide-nucleotide adenylyltransferase               | 3.20E-32 |
| 2558670563 | DRAFT_01231 | KO:K00952      | nicotinamide-nucleotide adenylyltransferase [EC:2.7.7.1]  | 3.00E-20 |
| 2558670563 | DRAFT_01231 | Locus_type     | CDS                                                       |          |
| 2558670563 | DRAFT_01231 | Product_name   | cytidyltransferase-like domain                            |          |
| 2558670563 | DRAFT_01231 | Scaffold       | DRAFT_contig_70_158_len_24011_read_count_400064.24        |          |
| 2558670563 | DRAFT_01231 | Coordinates    | 18787..19296(-)                                           |          |
| 2558670563 | DRAFT_01231 | DNA_length     | 510bp                                                     |          |
| 2558670563 | DRAFT_01231 | Protein_length | 169aa                                                     |          |
| 2558670563 | DRAFT_01231 | GC             |                                                           | 0.48     |
|            |             |                |                                                           |          |
| 2558670564 | DRAFT_01232 | COG_category   | [I] Lipid transport and metabolism                        |          |
| 2558670564 | DRAFT_01232 | COG1443        | Isopentenylidiphosphate isomerase                         | 2.00E-16 |
| 2558670564 | DRAFT_01232 | pfam00293      | NUDIX                                                     | 2.40E-16 |
| 2558670564 | DRAFT_01232 | Locus_type     | CDS                                                       |          |
| 2558670564 | DRAFT_01232 | Product_name   | Isopentenylidiphosphate isomerase                         |          |
| 2558670564 | DRAFT_01232 | Scaffold       | DRAFT_contig_70_158_len_24011_read_count_400064.24        |          |
| 2558670564 | DRAFT_01232 | Coordinates    | 19361..19852(-)                                           |          |
| 2558670564 | DRAFT_01232 | DNA_length     | 492bp                                                     |          |
| 2558670564 | DRAFT_01232 | Protein_length | 163aa                                                     |          |
| 2558670564 | DRAFT_01232 | GC             |                                                           | 0.56     |
|            |             |                |                                                           |          |
| 2558670565 | DRAFT_01233 | pfam08241      | Methyltransf_11                                           | 1.10E-12 |
| 2558670565 | DRAFT_01233 | Locus_type     | CDS                                                       |          |
| 2558670565 | DRAFT_01233 | Product_name   | Methylase involved in ubiquinone/menaquinone biosynthesis |          |
| 2558670565 | DRAFT_01233 | Scaffold       | DRAFT_contig_70_158_len_24011_read_count_400064.24        |          |
| 2558670565 | DRAFT_01233 | Coordinates    | 19990..20811(-)                                           |          |
| 2558670565 | DRAFT_01233 | DNA_length     | 822bp                                                     |          |
| 2558670565 | DRAFT_01233 | Protein_length | 273aa                                                     |          |

|            |             |                |                                                           |          |
|------------|-------------|----------------|-----------------------------------------------------------|----------|
| 2558670565 | DRAFT_01233 | GC             |                                                           | 0.54     |
| 2558670566 | DRAFT_01234 | COG_category   | [R] General function prediction only                      |          |
| 2558670566 | DRAFT_01234 | COG0456        | Acetyltransferases                                        | 6.00E-09 |
| 2558670566 | DRAFT_01234 | pfam00583      | Acetyltransf_1                                            | 1.00E-14 |
| 2558670566 | DRAFT_01234 | Locus_type     | CDS                                                       |          |
| 2558670566 | DRAFT_01234 | Product_name   | Acetyltransferases                                        |          |
| 2558670566 | DRAFT_01234 | Scaffold       | DRAFT_contig_70_158_len_24011_read_count_400064.24        |          |
| 2558670566 | DRAFT_01234 | Coordinates    | 20911..21375(-)                                           |          |
| 2558670566 | DRAFT_01234 | DNA_length     | 465bp                                                     |          |
| 2558670566 | DRAFT_01234 | Protein_length | 154aa                                                     |          |
| 2558670566 | DRAFT_01234 | GC             |                                                           | 0.57     |
| 2558670567 | DRAFT_01235 | Locus_type     | CDS                                                       |          |
| 2558670567 | DRAFT_01235 | Product_name   | hypothetical protein                                      |          |
| 2558670567 | DRAFT_01235 | Scaffold       | DRAFT_contig_70_158_len_24011_read_count_400064.24        |          |
| 2558670567 | DRAFT_01235 | Coordinates    | 21569..21961(-)                                           |          |
| 2558670567 | DRAFT_01235 | DNA_length     | 393bp                                                     |          |
| 2558670567 | DRAFT_01235 | Protein_length | 130aa                                                     |          |
| 2558670567 | DRAFT_01235 | GC             |                                                           | 0.5      |
| 2558670567 | DRAFT_01235 | Transmembrane  | Yes                                                       |          |
| 2558670568 | DRAFT_01236 | pfam08241      | Methyltransf_11                                           | 5.40E-13 |
| 2558670568 | DRAFT_01236 | Locus_type     | CDS                                                       |          |
| 2558670568 | DRAFT_01236 | Product_name   | Methylase involved in ubiquinone/menaquinone biosynthesis |          |
| 2558670568 | DRAFT_01236 | Scaffold       | DRAFT_contig_70_158_len_24011_read_count_400064.24        |          |
| 2558670568 | DRAFT_01236 | Coordinates    | 22327..23103(+)                                           |          |
| 2558670568 | DRAFT_01236 | DNA_length     | 777bp                                                     |          |
| 2558670568 | DRAFT_01236 | Protein_length | 258aa                                                     |          |
| 2558670568 | DRAFT_01236 | GC             |                                                           | 0.59     |
| 2558670569 | DRAFT_01237 | pfam00583      | Acetyltransf_1                                            | 1.20E-12 |
| 2558670569 | DRAFT_01237 | Locus_type     | CDS                                                       |          |
| 2558670569 | DRAFT_01237 | Product_name   | Acetyltransferases                                        |          |

|            |             |                |                                                                        |                                                                       |          |
|------------|-------------|----------------|------------------------------------------------------------------------|-----------------------------------------------------------------------|----------|
| 2558670569 | DRAFT_01237 | Scaffold       |                                                                        | DRAFT_contig_70_158_len_24011_read_count_400064.24                    |          |
| 2558670569 | DRAFT_01237 | Coordinates    |                                                                        | 23272..23745(+)                                                       |          |
| 2558670569 | DRAFT_01237 | DNA_length     |                                                                        | 474bp                                                                 |          |
| 2558670569 | DRAFT_01237 | Protein_length |                                                                        | 157aa                                                                 |          |
| 2558670569 | DRAFT_01237 | GC             |                                                                        |                                                                       | 0.55     |
| 2558670570 | DRAFT_01238 | pfam12697      | Abhydrolase_6                                                          |                                                                       | 6.70E-19 |
| 2558670570 | DRAFT_01238 | Locus_type     |                                                                        | CDS                                                                   |          |
| 2558670570 | DRAFT_01238 | Product_name   |                                                                        | Predicted hydrolases or acyltransferases (alpha/beta hydrolase superi |          |
| 2558670570 | DRAFT_01238 | Scaffold       |                                                                        | DRAFT_contig_70_169_len_23014_read_count_390000.25                    |          |
| 2558670570 | DRAFT_01238 | Coordinates    |                                                                        | 2..439(-)                                                             |          |
| 2558670570 | DRAFT_01238 | DNA_length     |                                                                        | 438bp                                                                 |          |
| 2558670570 | DRAFT_01238 | Protein_length |                                                                        | 146aa                                                                 |          |
| 2558670570 | DRAFT_01238 | GC             |                                                                        |                                                                       | 0.6      |
| 2558670571 | DRAFT_01239 | COG_category   | [E] Amino acid transport and metabolism                                |                                                                       |          |
| 2558670571 | DRAFT_01239 | COG1703        | Putative periplasmic protein kinase ArgK and related GTPases of G3E fa | 8.00E-70                                                              |          |
| 2558670571 | DRAFT_01239 | pfam03308      | ArgK                                                                   | 6.10E-84                                                              |          |
| 2558670571 | DRAFT_01239 | EC:2.7.-       | Transferases. Transferring phosphorous-containing groups.              |                                                                       |          |
| 2558670571 | DRAFT_01239 | TIGR00750      | LAO/AO transport system ATPase                                         | 9.80E-93                                                              |          |
| 2558670571 | DRAFT_01239 | KO:K07588      | LAO/AO transport system kinase [EC:2.7.-.-]                            | 0.00E+00                                                              |          |
| 2558670571 | DRAFT_01239 | Locus_type     |                                                                        | CDS                                                                   |          |
| 2558670571 | DRAFT_01239 | Product_name   |                                                                        | LAO/AO transport system ATPase                                        |          |
| 2558670571 | DRAFT_01239 | Scaffold       |                                                                        | DRAFT_contig_70_169_len_23014_read_count_390000.25                    |          |
| 2558670571 | DRAFT_01239 | Coordinates    |                                                                        | 507..1442(-)                                                          |          |
| 2558670571 | DRAFT_01239 | DNA_length     |                                                                        | 936bp                                                                 |          |
| 2558670571 | DRAFT_01239 | Protein_length |                                                                        | 311aa                                                                 |          |
| 2558670571 | DRAFT_01239 | GC             |                                                                        |                                                                       | 0.61     |
| 2558670572 | DRAFT_01240 | KEGG_module    | M00376: 3-Hydroxypropionate bicycle                                    |                                                                       |          |
| 2558670572 | DRAFT_01240 | KEGG_module    | M00375: Hydroxypropionate-hydroxybutylate cycle                        |                                                                       |          |
| 2558670572 | DRAFT_01240 | Metacyc        | PWY0-43: conversion of succinate to propionate                         |                                                                       |          |
| 2558670572 | DRAFT_01240 | Metacyc        | P108-PWY: pyruvate fermentation to propionate I                        |                                                                       |          |
| 2558670572 | DRAFT_01240 | Metacyc        | PWY-5789: 3-hydroxypropionate/4-hydroxybutyrate cycle                  |                                                                       |          |



|            |             |                |                                                                         |          |
|------------|-------------|----------------|-------------------------------------------------------------------------|----------|
| 2558670572 | DRAFT_01240 | Metacyc        | PROPIONMET-PWY: methylmalonyl pathway                                   |          |
| 2558670572 | DRAFT_01240 | Metacyc        | PWY-6728: methylaspartate cycle                                         |          |
| 2558670572 | DRAFT_01240 | Metacyc        | PWY-5743: 3-hydroxypropionate cycle                                     |          |
| 2558670572 | DRAFT_01240 | IMG_pathway    | 370: Oxaloacetate conversion to propionate via methylmalonyl-CoA        |          |
| 2558670572 | DRAFT_01240 | IMG_pathway    | 525: Hydroxypropionate cycle                                            |          |
| 2558670572 | DRAFT_01240 | IMG_pathway    | 596: 3-hydroxypropionate/4-hydroxybutyrate cycle                        |          |
| 2558670572 | DRAFT_01240 | IMG_pathway    | 837: Propionyl-CoA conversion to succinyl-CoA via methylmalonyl pathway |          |
| 2558670572 | DRAFT_01240 | IMG_pathway    | 962: Glyoxylate from acetyl-CoA via ethylmalonyl-CoA pathway            |          |
| 2558670572 | DRAFT_01240 | COG_category   | [I] Lipid transport and metabolism                                      |          |
| 2558670572 | DRAFT_01240 | COG1884        | Methylmalonyl-CoA mutase, N-terminal domain/subunit                     | 0.00E+00 |
| 2558670572 | DRAFT_01240 | pfam01642      | MM_CoA_mutase                                                           | 0.00E+00 |
| 2558670572 | DRAFT_01240 | EC:5.4.99.2    | Methylmalonyl-CoA mutase.                                               |          |
| 2558670572 | DRAFT_01240 | TIGR00641      | methylmalonyl-CoA mutase N-terminal domain                              | 0.00E+00 |
| 2558670572 | DRAFT_01240 | KO:K01848      | methylmalonyl-CoA mutase, N-terminal domain [EC:5.4.99.2]               | 0.00E+00 |
| 2558670572 | DRAFT_01240 | ITERM:01588    | methylmalonyl-CoA mutase (EC 5.4.99.2)                                  |          |
| 2558670572 | DRAFT_01240 | Locus_type     | CDS                                                                     |          |
| 2558670572 | DRAFT_01240 | Product_name   | methylmalonyl-CoA mutase (EC 5.4.99.2)                                  |          |
| 2558670572 | DRAFT_01240 | Scaffold       | DRAFT_contig_70_169_len_23014_read_count_390000.25                      |          |
| 2558670572 | DRAFT_01240 | Coordinates    | 1487..3262(+)                                                           |          |
| 2558670572 | DRAFT_01240 | DNA_length     | 1776bp                                                                  |          |
| 2558670572 | DRAFT_01240 | Protein_length | 591aa                                                                   |          |
| 2558670572 | DRAFT_01240 | GC             |                                                                         | 0.58     |
| 2558670573 | DRAFT_01241 | KEGG_module    | M00376: 3-Hydroxypropionate bicycle                                     |          |
| 2558670573 | DRAFT_01241 | KEGG_module    | M00375: Hydroxypropionate-hydroxybutylate cycle                         |          |
| 2558670573 | DRAFT_01241 | Metacyc        | PWY-5789: 3-hydroxypropionate/4-hydroxybutyrate cycle                   |          |
| 2558670573 | DRAFT_01241 | Metacyc        | PWY-5743: 3-hydroxypropionate cycle                                     |          |
| 2558670573 | DRAFT_01241 | Metacyc        | P108-PWY: pyruvate fermentation to propionate I                         |          |
| 2558670573 | DRAFT_01241 | Metacyc        | PROPIONMET-PWY: methylmalonyl pathway                                   |          |
| 2558670573 | DRAFT_01241 | Metacyc        | PWY-6728: methylaspartate cycle                                         |          |
| 2558670573 | DRAFT_01241 | Metacyc        | PWY0-43: conversion of succinate to propionate                          |          |
| 2558670573 | DRAFT_01241 | COG_category   | [I] Lipid transport and metabolism                                      |          |
| 2558670573 | DRAFT_01241 | COG2185        | Methylmalonyl-CoA mutase, C-terminal domain/subunit (cobalamin-bi       | 6.00E-36 |
| 2558670573 | DRAFT_01241 | pfam02310      | B12-binding                                                             | 1.10E-18 |

|            |             |                |                                                                 |          |
|------------|-------------|----------------|-----------------------------------------------------------------|----------|
| 2558670573 | DRAFT_01241 | EC:5.4.99.2    | Methylmalonyl-CoA mutase.                                       |          |
| 2558670573 | DRAFT_01241 | TIGR00640      | methylmalonyl-CoA mutase C-terminal domain                      | 3.90E-52 |
| 2558670573 | DRAFT_01241 | KO:K01849      | methylmalonyl-CoA mutase, C-terminal domain [EC:5.4.99.2]       | 6.60E-44 |
| 2558670573 | DRAFT_01241 | Locus_type     | CDS                                                             |          |
| 2558670573 | DRAFT_01241 | Product_name   | methylmalonyl-CoA mutase C-terminal domain                      |          |
| 2558670573 | DRAFT_01241 | Scaffold       | DRAFT_contig_70_169_len_23014_read_count_390000.25              |          |
| 2558670573 | DRAFT_01241 | Coordinates    | 3238..3738(+)                                                   |          |
| 2558670573 | DRAFT_01241 | DNA_length     | 501bp                                                           |          |
| 2558670573 | DRAFT_01241 | Protein_length | 166aa                                                           |          |
| 2558670573 | DRAFT_01241 | GC             |                                                                 | 0.59     |
|            |             |                |                                                                 |          |
| 2558670574 | DRAFT_01242 | COG_category   | [l] Lipid transport and metabolism                              |          |
| 2558670574 | DRAFT_01242 | COG1960        | Acyl-CoA dehydrogenases                                         | 1.00E-69 |
| 2558670574 | DRAFT_01242 | pfam02771      | Acyl-CoA_dh_N                                                   | 8.90E-20 |
| 2558670574 | DRAFT_01242 | pfam00441      | Acyl-CoA_dh_1                                                   | 4.30E-37 |
| 2558670574 | DRAFT_01242 | pfam02770      | Acyl-CoA_dh_M                                                   | 8.00E-14 |
| 2558670574 | DRAFT_01242 | EC:1.3.99.32   | Glutaryl-CoA dehydrogenase (non-decarboxylating).               |          |
| 2558670574 | DRAFT_01242 | KO:K16173      | glutaryl-CoA dehydrogenase (non-decarboxylating) [EC:1.3.99.32] | 0.00E+00 |
| 2558670574 | DRAFT_01242 | Locus_type     | CDS                                                             |          |
| 2558670574 | DRAFT_01242 | Product_name   | Acyl-CoA dehydrogenases                                         |          |
| 2558670574 | DRAFT_01242 | Scaffold       | DRAFT_contig_70_169_len_23014_read_count_390000.25              |          |
| 2558670574 | DRAFT_01242 | Coordinates    | 3743..4963(+)                                                   |          |
| 2558670574 | DRAFT_01242 | DNA_length     | 1221bp                                                          |          |
| 2558670574 | DRAFT_01242 | Protein_length | 406aa                                                           |          |
| 2558670574 | DRAFT_01242 | GC             |                                                                 | 0.58     |
|            |             |                |                                                                 |          |
| 2558670575 | DRAFT_01243 | Locus_type     | CDS                                                             |          |
| 2558670575 | DRAFT_01243 | Product_name   | hypothetical protein                                            |          |
| 2558670575 | DRAFT_01243 | Scaffold       | DRAFT_contig_70_169_len_23014_read_count_390000.25              |          |
| 2558670575 | DRAFT_01243 | Coordinates    | 5060..5290(+)                                                   |          |
| 2558670575 | DRAFT_01243 | DNA_length     | 231bp                                                           |          |
| 2558670575 | DRAFT_01243 | Protein_length | 76aa                                                            |          |
| 2558670575 | DRAFT_01243 | GC             |                                                                 | 0.62     |

|            |             |                |                                                                                             |          |
|------------|-------------|----------------|---------------------------------------------------------------------------------------------|----------|
| 2558670576 | DRAFT_01244 | COG_category   | [C] Energy production and conversion                                                        |          |
| 2558670576 | DRAFT_01244 | COG0644        | Dehydrogenases (flavoproteins)                                                              | 2.00E-55 |
| 2558670576 | DRAFT_01244 | pfam01266      | DAO                                                                                         | 6.30E-15 |
| 2558670576 | DRAFT_01244 | EC:1.5.5.-     | Oxidoreductases. Acting on the CH-NH group of donors. With a quinone or similar compound as |          |
| 2558670576 | DRAFT_01244 | KO:K00313      | electron transfer flavoprotein-quinone oxidoreductase [EC:1.5.5.-]                          | 0.00E+00 |
| 2558670576 | DRAFT_01244 | Locus_type     | CDS                                                                                         |          |
| 2558670576 | DRAFT_01244 | Product_name   | Dehydrogenases (flavoproteins)                                                              |          |
| 2558670576 | DRAFT_01244 | Scaffold       | DRAFT_contig_70_169_len_23014_read_count_390000.25                                          |          |
| 2558670576 | DRAFT_01244 | Coordinates    | 5251..6612(+)                                                                               |          |
| 2558670576 | DRAFT_01244 | DNA_length     | 1362bp                                                                                      |          |
| 2558670576 | DRAFT_01244 | Protein_length | 453aa                                                                                       |          |
| 2558670576 | DRAFT_01244 | GC             |                                                                                             | 0.58     |
| 2558670577 | DRAFT_01245 | COG_category   | [C] Energy production and conversion                                                        |          |
| 2558670577 | DRAFT_01245 | COG2440        | Ferredoxin-like protein                                                                     | 2.00E-20 |
| 2558670577 | DRAFT_01245 | KO:K03855      | ferredoxin like protein                                                                     | 3.40E-20 |
| 2558670577 | DRAFT_01245 | Locus_type     | CDS                                                                                         |          |
| 2558670577 | DRAFT_01245 | Product_name   | Ferredoxin-like protein                                                                     |          |
| 2558670577 | DRAFT_01245 | Scaffold       | DRAFT_contig_70_169_len_23014_read_count_390000.25                                          |          |
| 2558670577 | DRAFT_01245 | Coordinates    | 6609..6893(+)                                                                               |          |
| 2558670577 | DRAFT_01245 | DNA_length     | 285bp                                                                                       |          |
| 2558670577 | DRAFT_01245 | Protein_length | 94aa                                                                                        |          |
| 2558670577 | DRAFT_01245 | GC             |                                                                                             | 0.6      |
| 2558670578 | DRAFT_01246 | COG_category   | [C] Energy production and conversion                                                        |          |
| 2558670578 | DRAFT_01246 | COG2086        | Electron transfer flavoprotein, beta subunit                                                | 6.00E-54 |
| 2558670578 | DRAFT_01246 | pfam01012      | ETF                                                                                         | 2.30E-40 |
| 2558670578 | DRAFT_01246 | KO:K03521      | electron transfer flavoprotein beta subunit                                                 | 0.00E+00 |
| 2558670578 | DRAFT_01246 | ITERM:01639    | electron transfer flavoprotein beta subunit                                                 |          |
| 2558670578 | DRAFT_01246 | Locus_type     | CDS                                                                                         |          |
| 2558670578 | DRAFT_01246 | Product_name   | electron transfer flavoprotein beta subunit                                                 |          |
| 2558670578 | DRAFT_01246 | Scaffold       | DRAFT_contig_70_169_len_23014_read_count_390000.25                                          |          |
| 2558670578 | DRAFT_01246 | Coordinates    | 6931..7704(+)                                                                               |          |
| 2558670578 | DRAFT_01246 | DNA_length     | 774bp                                                                                       |          |

|            |             |                |                                                                    |          |
|------------|-------------|----------------|--------------------------------------------------------------------|----------|
| 2558670578 | DRAFT_01246 | Protein_length | 257aa                                                              |          |
| 2558670578 | DRAFT_01246 | GC             |                                                                    | 0.61     |
| 2558670579 | DRAFT_01247 | COG_category   | [C] Energy production and conversion                               |          |
| 2558670579 | DRAFT_01247 | COG2025        | Electron transfer flavoprotein, alpha subunit                      | 1.00E-81 |
| 2558670579 | DRAFT_01247 | pfam01012      | ETF                                                                | 3.80E-40 |
| 2558670579 | DRAFT_01247 | pfam00766      | ETF_alpha                                                          | 5.20E-30 |
| 2558670579 | DRAFT_01247 | KO:K03522      | electron transfer flavoprotein alpha subunit                       | 0.00E+00 |
| 2558670579 | DRAFT_01247 | ITERM:01638    | electron transfer flavoprotein alpha subunit apoprotein            |          |
| 2558670579 | DRAFT_01247 | Locus_type     | CDS                                                                |          |
| 2558670579 | DRAFT_01247 | Product_name   | electron transfer flavoprotein alpha subunit apoprotein            |          |
| 2558670579 | DRAFT_01247 | Scaffold       | DRAFT_contig_70_169_len_23014_read_count_390000.25                 |          |
| 2558670579 | DRAFT_01247 | Coordinates    | 7709..8692(+)                                                      |          |
| 2558670579 | DRAFT_01247 | DNA_length     | 984bp                                                              |          |
| 2558670579 | DRAFT_01247 | Protein_length | 327aa                                                              |          |
| 2558670579 | DRAFT_01247 | GC             |                                                                    | 0.6      |
| 2558670580 | DRAFT_01248 | KEGG_module    | M00013: Malonate semialdehyde pathway, propanoyl-CoA => Acetyl-CoA |          |
| 2558670580 | DRAFT_01248 | KEGG_module    | M00036: Leucine degradation, leucine => acetoacetate + acetyl-CoA  |          |
| 2558670580 | DRAFT_01248 | KEGG_module    | M00087: beta-Oxidation                                             |          |
| 2558670580 | DRAFT_01248 | Metacyc        | PWY-7094: fatty acid salvage                                       |          |
| 2558670580 | DRAFT_01248 | COG_category   | [I] Lipid transport and metabolism                                 |          |
| 2558670580 | DRAFT_01248 | COG1960        | Acyl-CoA dehydrogenases                                            | 4.00E-57 |
| 2558670580 | DRAFT_01248 | pfam00441      | Acyl-CoA_dh_1                                                      | 2.30E-31 |
| 2558670580 | DRAFT_01248 | pfam02770      | Acyl-CoA_dh_M                                                      | 1.80E-10 |
| 2558670580 | DRAFT_01248 | pfam02771      | Acyl-CoA_dh_N                                                      | 2.80E-27 |
| 2558670580 | DRAFT_01248 | EC:1.3.8.7     | Medium-chain acyl-CoA dehydrogenase.                               |          |
| 2558670580 | DRAFT_01248 | KO:K00249      | acyl-CoA dehydrogenase [EC:1.3.8.7]                                | 0.00E+00 |
| 2558670580 | DRAFT_01248 | Locus_type     | CDS                                                                |          |
| 2558670580 | DRAFT_01248 | Product_name   | Acyl-CoA dehydrogenases                                            |          |
| 2558670580 | DRAFT_01248 | Scaffold       | DRAFT_contig_70_169_len_23014_read_count_390000.25                 |          |
| 2558670580 | DRAFT_01248 | Coordinates    | 8762..10003(+)                                                     |          |
| 2558670580 | DRAFT_01248 | DNA_length     | 1242bp                                                             |          |
| 2558670580 | DRAFT_01248 | Protein_length | 413aa                                                              |          |

|            |             |                |                                                                                |          |
|------------|-------------|----------------|--------------------------------------------------------------------------------|----------|
| 2558670580 | DRAFT_01248 | GC             |                                                                                | 0.59     |
| 2558670581 | DRAFT_01249 | Metacyc        | ASPARAGINESYN-PWY: asparagine biosynthesis II                                  |          |
| 2558670581 | DRAFT_01249 | IMG_pathway    | 107: Asparagine synthesis using NH3                                            |          |
| 2558670581 | DRAFT_01249 | COG_category   | [E] Amino acid transport and metabolism                                        |          |
| 2558670581 | DRAFT_01249 | COG2502        | Asparagine synthetase A                                                        | 8.00E-92 |
| 2558670581 | DRAFT_01249 | pfam03590      | AsnA                                                                           | 5.00E-69 |
| 2558670581 | DRAFT_01249 | EC:6.3.1.1     | Aspartate--ammonia ligase.                                                     |          |
| 2558670581 | DRAFT_01249 | TIGR00669      | aspartate--ammonia ligase, AsnA-type                                           | 9.20E-99 |
| 2558670581 | DRAFT_01249 | KO:K01914      | aspartate--ammonia ligase [EC:6.3.1.1]                                         | 0.00E+00 |
| 2558670581 | DRAFT_01249 | ITRM:00175     | aspartate-ammonia ligase (EC 6.3.1.1)                                          |          |
| 2558670581 | DRAFT_01249 | Locus_type     | CDS                                                                            |          |
| 2558670581 | DRAFT_01249 | Product_name   | aspartate-ammonia ligase (EC 6.3.1.1)                                          |          |
| 2558670581 | DRAFT_01249 | Scaffold       | DRAFT_contig_70_169_len_23014_read_count_390000.25                             |          |
| 2558670581 | DRAFT_01249 | Coordinates    | 10155..11279(+)                                                                |          |
| 2558670581 | DRAFT_01249 | DNA_length     | 1125bp                                                                         |          |
| 2558670581 | DRAFT_01249 | Protein_length | 374aa                                                                          |          |
| 2558670581 | DRAFT_01249 | GC             |                                                                                | 0.56     |
| 2558670582 | DRAFT_01250 | Metacyc        | PWY-7018: paromomycin biosynthesis                                             |          |
| 2558670582 | DRAFT_01250 | Metacyc        | PWY-5706: alliin degradation                                                   |          |
| 2558670582 | DRAFT_01250 | Metacyc        | PWY-5707: isoalliin degradation                                                |          |
| 2558670582 | DRAFT_01250 | Metacyc        | PWY-7000: kanamycin biosynthesis                                               |          |
| 2558670582 | DRAFT_01250 | Metacyc        | PWY-181: photorespiration                                                      |          |
| 2558670582 | DRAFT_01250 | Metacyc        | P421-PWY: 4-nitrotoluene degradation I                                         |          |
| 2558670582 | DRAFT_01250 | COG_category   | [R] General function prediction only                                           |          |
| 2558670582 | DRAFT_01250 | COG0579        | Predicted dehydrogenase                                                        | 1.00E-48 |
| 2558670582 | DRAFT_01250 | pfam01266      | DAO                                                                            | 6.40E-38 |
| 2558670582 | DRAFT_01250 | EC:1.1.3.-     | Oxidoreductases. Acting on the CH-OH group of donors. With oxygen as acceptor. |          |
| 2558670582 | DRAFT_01250 | KO:K15736      | L-2-hydroxyglutarate oxidase [EC:1.1.3.-]                                      | 0.00E+00 |
| 2558670582 | DRAFT_01250 | Locus_type     | CDS                                                                            |          |
| 2558670582 | DRAFT_01250 | Product_name   | Predicted dehydrogenase                                                        |          |
| 2558670582 | DRAFT_01250 | Scaffold       | DRAFT_contig_70_169_len_23014_read_count_390000.25                             |          |
| 2558670582 | DRAFT_01250 | Coordinates    | 11340..12668(-)                                                                |          |

|            |             |                |                                                     |           |
|------------|-------------|----------------|-----------------------------------------------------|-----------|
| 2558670582 | DRAFT_01250 | DNA_length     | 1329bp                                              |           |
| 2558670582 | DRAFT_01250 | Protein_length | 442aa                                               |           |
| 2558670582 | DRAFT_01250 | GC             |                                                     | 0.59      |
| 2558670582 | DRAFT_01250 | Transmembrane  | Yes                                                 |           |
| 2558670583 | DRAFT_01251 | COG_category   | [J] Translation, ribosomal structure and biogenesis |           |
| 2558670583 | DRAFT_01251 | COG0361        | Translation initiation factor 1 (IF-1)              | 2.00E-15  |
| 2558670583 | DRAFT_01251 | pfam01176      | eIF-1a                                              | 2.10E-22  |
| 2558670583 | DRAFT_01251 | TIGR00523      | eukaryotic/archaeal initiation factor 1A            | 6.50E-35  |
| 2558670583 | DRAFT_01251 | KO:K03236      | translation initiation factor 1A                    | 2.30E-31  |
| 2558670583 | DRAFT_01251 | Locus_type     | CDS                                                 |           |
| 2558670583 | DRAFT_01251 | Product_name   | translation initiation factor 1A (aeIF-1A)          |           |
| 2558670583 | DRAFT_01251 | Scaffold       | DRAFT_contig_70_169_len_23014_read_count_390000.25  |           |
| 2558670583 | DRAFT_01251 | Coordinates    | 12764..13069(-)                                     |           |
| 2558670583 | DRAFT_01251 | DNA_length     | 306bp                                               |           |
| 2558670583 | DRAFT_01251 | Protein_length | 101aa                                               |           |
| 2558670583 | DRAFT_01251 | GC             |                                                     | 0.55      |
| 2558670584 | DRAFT_01252 | COG_category   | [K] Transcription                                   |           |
| 2558670584 | DRAFT_01252 | COG_category   | [J] Translation, ribosomal structure and biogenesis |           |
| 2558670584 | DRAFT_01252 | COG_category   | [L] Replication, recombination and repair           |           |
| 2558670584 | DRAFT_01252 | COG0513        | Superfamily II DNA and RNA helicases                | 2.00E-108 |
| 2558670584 | DRAFT_01252 | pfam00270      | DEAD                                                | 2.40E-46  |
| 2558670584 | DRAFT_01252 | pfam00271      | Helicase_C                                          | 2.60E-24  |
| 2558670584 | DRAFT_01252 | EC:3.6.4.13    | RNA helicase.                                       |           |
| 2558670584 | DRAFT_01252 | KO:K05592      | ATP-dependent RNA helicase DeaD [EC:3.6.4.13]       | 0.00E+00  |
| 2558670584 | DRAFT_01252 | Locus_type     | CDS                                                 |           |
| 2558670584 | DRAFT_01252 | Product_name   | Superfamily II DNA and RNA helicases                |           |
| 2558670584 | DRAFT_01252 | Scaffold       | DRAFT_contig_70_169_len_23014_read_count_390000.25  |           |
| 2558670584 | DRAFT_01252 | Coordinates    | 13126..14334(-)                                     |           |
| 2558670584 | DRAFT_01252 | DNA_length     | 1209bp                                              |           |
| 2558670584 | DRAFT_01252 | Protein_length | 402aa                                               |           |
| 2558670584 | DRAFT_01252 | GC             |                                                     | 0.6       |

|            |             |                |                                                    |          |
|------------|-------------|----------------|----------------------------------------------------|----------|
| 2558670585 | DRAFT_01253 | COG_category   | [M] Cell wall/membrane/envelope biogenesis         |          |
| 2558670585 | DRAFT_01253 | COG1970        | Large-conductance mechanosensitive channel         | 1.00E-15 |
| 2558670585 | DRAFT_01253 | pfam01741      | MscL                                               | 1.80E-16 |
| 2558670585 | DRAFT_01253 | TIGR00220      | large conductance mechanosensitive channel protein | 1.30E-19 |
| 2558670585 | DRAFT_01253 | KO:K03282      | large conductance mechanosensitive channel         | 2.80E-14 |
| 2558670585 | DRAFT_01253 | Locus_type     | CDS                                                |          |
| 2558670585 | DRAFT_01253 | Product_name   | Large-conductance mechanosensitive channel         |          |
| 2558670585 | DRAFT_01253 | Scaffold       | DRAFT_contig_70_169_len_23014_read_count_390000.25 |          |
| 2558670585 | DRAFT_01253 | Coordinates    | 14653..15039(-)                                    |          |
| 2558670585 | DRAFT_01253 | DNA_length     | 387bp                                              |          |
| 2558670585 | DRAFT_01253 | Protein_length | 128aa                                              |          |
| 2558670585 | DRAFT_01253 | GC             |                                                    | 0.54     |
| 2558670585 | DRAFT_01253 | Transmembrane  | Yes                                                |          |
|            |             |                |                                                    |          |
| 2558670586 | DRAFT_01254 | Locus_type     | CDS                                                |          |
| 2558670586 | DRAFT_01254 | Product_name   | hypothetical protein                               |          |
| 2558670586 | DRAFT_01254 | Scaffold       | DRAFT_contig_70_169_len_23014_read_count_390000.25 |          |
| 2558670586 | DRAFT_01254 | Coordinates    | 15370..15699(-)                                    |          |
| 2558670586 | DRAFT_01254 | DNA_length     | 330bp                                              |          |
| 2558670586 | DRAFT_01254 | Protein_length | 109aa                                              |          |
| 2558670586 | DRAFT_01254 | GC             |                                                    | 0.55     |
|            |             |                |                                                    |          |
| 2558670587 | DRAFT_01255 | Locus_type     | CDS                                                |          |
| 2558670587 | DRAFT_01255 | Product_name   | hypothetical protein                               |          |
| 2558670587 | DRAFT_01255 | Scaffold       | DRAFT_contig_70_169_len_23014_read_count_390000.25 |          |
| 2558670587 | DRAFT_01255 | Coordinates    | 15748..16485(-)                                    |          |
| 2558670587 | DRAFT_01255 | DNA_length     | 738bp                                              |          |
| 2558670587 | DRAFT_01255 | Protein_length | 245aa                                              |          |
| 2558670587 | DRAFT_01255 | GC             |                                                    | 0.56     |
| 2558670587 | DRAFT_01255 | Transmembrane  | Yes                                                |          |
|            |             |                |                                                    |          |
| 2558670588 | DRAFT_01256 | Locus_type     | tRNA                                               |          |
| 2558670588 | DRAFT_01256 | Product_name   | tRNA_Asp_GTC                                       |          |
| 2558670588 | DRAFT_01256 | Scaffold       | DRAFT_contig_70_169_len_23014_read_count_390000.25 |          |

|            |             |                |                                                     |          |
|------------|-------------|----------------|-----------------------------------------------------|----------|
| 2558670588 | DRAFT_01256 | Coordinates    | 16795..16863(-)                                     |          |
| 2558670588 | DRAFT_01256 | DNA_length     | 69bp                                                |          |
| 2558670588 | DRAFT_01256 | GC             |                                                     | 0.57     |
| 2558670589 | DRAFT_01257 | pfam12847      | Methyltransf_18                                     | 1.00E-08 |
| 2558670589 | DRAFT_01257 | Locus_type     | CDS                                                 |          |
| 2558670589 | DRAFT_01257 | Product_name   | Methyltransferase domain                            |          |
| 2558670589 | DRAFT_01257 | Scaffold       | DRAFT_contig_70_169_len_23014_read_count_390000.25  |          |
| 2558670589 | DRAFT_01257 | Coordinates    | 17323..17913(-)                                     |          |
| 2558670589 | DRAFT_01257 | DNA_length     | 591bp                                               |          |
| 2558670589 | DRAFT_01257 | Protein_length | 196aa                                               |          |
| 2558670589 | DRAFT_01257 | GC             |                                                     | 0.55     |
| 2558670590 | DRAFT_01258 | pfam02353      | CMAS                                                | 1.70E-09 |
| 2558670590 | DRAFT_01258 | Locus_type     | CDS                                                 |          |
| 2558670590 | DRAFT_01258 | Product_name   | Mycolic acid cyclopropane synthetase                |          |
| 2558670590 | DRAFT_01258 | Scaffold       | DRAFT_contig_70_169_len_23014_read_count_390000.25  |          |
| 2558670590 | DRAFT_01258 | Coordinates    | 18020..18490(-)                                     |          |
| 2558670590 | DRAFT_01258 | DNA_length     | 471bp                                               |          |
| 2558670590 | DRAFT_01258 | Protein_length | 156aa                                               |          |
| 2558670590 | DRAFT_01258 | GC             |                                                     | 0.55     |
| 2558670591 | DRAFT_01259 | KEGG_module    | M00178: Ribosome, bacteria                          |          |
| 2558670591 | DRAFT_01259 | KEGG_module    | M00179: Ribosome, archaea                           |          |
| 2558670591 | DRAFT_01259 | COG_category   | [J] Translation, ribosomal structure and biogenesis |          |
| 2558670591 | DRAFT_01259 | COG0051        | Ribosomal protein S10                               | 2.00E-23 |
| 2558670591 | DRAFT_01259 | pfam00338      | Ribosomal_S10                                       | 7.40E-29 |
| 2558670591 | DRAFT_01259 | TIGR01046      | ribosomal protein S10(archaeal)/S20(eukaryotic)     | 2.90E-47 |
| 2558670591 | DRAFT_01259 | KO:K02946      | small subunit ribosomal protein S10                 | 1.40E-31 |
| 2558670591 | DRAFT_01259 | ITERM:00293    | SSU ribosomal protein S10P                          |          |
| 2558670591 | DRAFT_01259 | Locus_type     | CDS                                                 |          |
| 2558670591 | DRAFT_01259 | Product_name   | SSU ribosomal protein S10P                          |          |
| 2558670591 | DRAFT_01259 | Scaffold       | DRAFT_contig_70_169_len_23014_read_count_390000.25  |          |
| 2558670591 | DRAFT_01259 | Coordinates    | 18649..18960(+)                                     |          |



|            |             |                |                                                                  |          |
|------------|-------------|----------------|------------------------------------------------------------------|----------|
| 2558670591 | DRAFT_01259 | DNA_length     | 312bp                                                            |          |
| 2558670591 | DRAFT_01259 | Protein_length | 103aa                                                            |          |
| 2558670591 | DRAFT_01259 | GC             |                                                                  | 0.54     |
|            |             |                |                                                                  |          |
| 2558670592 | DRAFT_01260 | Locus_type     | CDS                                                              |          |
| 2558670592 | DRAFT_01260 | Product_name   | hypothetical protein                                             |          |
| 2558670592 | DRAFT_01260 | Scaffold       | DRAFT_contig_70_169_len_23014_read_count_390000.25               |          |
| 2558670592 | DRAFT_01260 | Coordinates    | 19130..19309(-)                                                  |          |
| 2558670592 | DRAFT_01260 | DNA_length     | 180bp                                                            |          |
| 2558670592 | DRAFT_01260 | Protein_length | 59aa                                                             |          |
| 2558670592 | DRAFT_01260 | GC             |                                                                  | 0.48     |
|            |             |                |                                                                  |          |
| 2558670593 | DRAFT_01261 | Locus_type     | CDS                                                              |          |
| 2558670593 | DRAFT_01261 | Product_name   | hypothetical protein                                             |          |
| 2558670593 | DRAFT_01261 | Scaffold       | DRAFT_contig_70_169_len_23014_read_count_390000.25               |          |
| 2558670593 | DRAFT_01261 | Coordinates    | 19374..19553(+)                                                  |          |
| 2558670593 | DRAFT_01261 | DNA_length     | 180bp                                                            |          |
| 2558670593 | DRAFT_01261 | Protein_length | 59aa                                                             |          |
| 2558670593 | DRAFT_01261 | GC             |                                                                  | 0.54     |
|            |             |                |                                                                  |          |
| 2558670594 | DRAFT_01262 | KEGG_module    | M00403: HRD1/SEL1 ERAD complex                                   |          |
| 2558670594 | DRAFT_01262 | KEGG_module    | M00400: p97-Ufd1-Npl4 complex                                    |          |
| 2558670594 | DRAFT_01262 | COG_category   | [O] Posttranslational modification, protein turnover, chaperones |          |
| 2558670594 | DRAFT_01262 | COG0464        | ATPases of the AAA+ class                                        | 0.00E+00 |
| 2558670594 | DRAFT_01262 | pfam00004      | AAA                                                              | 2.70E-48 |
| 2558670594 | DRAFT_01262 | pfam00004      | AAA                                                              | 2.20E-45 |
| 2558670594 | DRAFT_01262 | pfam02933      | CDC48_2                                                          | 1.00E-08 |
| 2558670594 | DRAFT_01262 | pfam02359      | CDC48_N                                                          | 3.90E-28 |
| 2558670594 | DRAFT_01262 | TIGR01243      | AAA family ATPase, CDC48 subfamily                               | 0.00E+00 |
| 2558670594 | DRAFT_01262 | TIGR01242      | 26S proteasome subunit P45 family                                | 3.00E-96 |
| 2558670594 | DRAFT_01262 | KO:K13525      | transitional endoplasmic reticulum ATPase                        | 0.00E+00 |
| 2558670594 | DRAFT_01262 | Locus_type     | CDS                                                              |          |
| 2558670594 | DRAFT_01262 | Product_name   | AAA family ATPase, CDC48 subfamily                               |          |
| 2558670594 | DRAFT_01262 | Scaffold       | DRAFT_contig_70_169_len_23014_read_count_390000.25               |          |

|            |             |                |                                                                     |      |
|------------|-------------|----------------|---------------------------------------------------------------------|------|
| 2558670594 | DRAFT_01262 | Coordinates    | 19689..21878(-)                                                     |      |
| 2558670594 | DRAFT_01262 | DNA_length     | 2190bp                                                              |      |
| 2558670594 | DRAFT_01262 | Protein_length | 729aa                                                               |      |
| 2558670594 | DRAFT_01262 | GC             |                                                                     | 0.55 |
|            |             |                |                                                                     |      |
| 2558670595 | DRAFT_01263 | Locus_type     | CDS                                                                 |      |
| 2558670595 | DRAFT_01263 | Product_name   | hypothetical protein                                                |      |
| 2558670595 | DRAFT_01263 | Scaffold       | DRAFT_contig_70_169_len_23014_read_count_390000.25                  |      |
| 2558670595 | DRAFT_01263 | Coordinates    | 22849..23013(+)                                                     |      |
| 2558670595 | DRAFT_01263 | DNA_length     | 165bp                                                               |      |
| 2558670595 | DRAFT_01263 | Protein_length | 55aa                                                                |      |
| 2558670595 | DRAFT_01263 | GC             |                                                                     | 0.45 |
|            |             |                |                                                                     |      |
| 2558670596 | DRAFT_01264 | Locus_type     | tRNA                                                                |      |
| 2558670596 | DRAFT_01264 | Product_name   | tRNA_Arg_CCG                                                        |      |
| 2558670596 | DRAFT_01264 | Scaffold       | DRAFT_contig_70_192_len_21347_read_count_357287.26                  |      |
| 2558670596 | DRAFT_01264 | Coordinates    | 50..124(-)                                                          |      |
| 2558670596 | DRAFT_01264 | DNA_length     | 75bp                                                                |      |
| 2558670596 | DRAFT_01264 | GC             |                                                                     | 0.67 |
|            |             |                |                                                                     |      |
| 2558670597 | DRAFT_01265 | Locus_type     | CDS                                                                 |      |
| 2558670597 | DRAFT_01265 | Product_name   | hypothetical protein                                                |      |
| 2558670597 | DRAFT_01265 | Scaffold       | DRAFT_contig_70_192_len_21347_read_count_357287.26                  |      |
| 2558670597 | DRAFT_01265 | Coordinates    | 618..929(-)                                                         |      |
| 2558670597 | DRAFT_01265 | DNA_length     | 312bp                                                               |      |
| 2558670597 | DRAFT_01265 | Protein_length | 103aa                                                               |      |
| 2558670597 | DRAFT_01265 | GC             |                                                                     | 0.54 |
| 2558670597 | DRAFT_01265 | Transmembrane  | Yes                                                                 |      |
|            |             |                |                                                                     |      |
| 2558670598 | DRAFT_01266 | Locus_type     | CDS                                                                 |      |
| 2558670598 | DRAFT_01266 | Product_name   | Uncharacterized protein, possibly involved in aromatic compounds ca |      |
| 2558670598 | DRAFT_01266 | Scaffold       | DRAFT_contig_70_192_len_21347_read_count_357287.26                  |      |
| 2558670598 | DRAFT_01266 | Coordinates    | 1221..1703(-)                                                       |      |
| 2558670598 | DRAFT_01266 | DNA_length     | 483bp                                                               |      |

|            |             |                |                                                               |          |
|------------|-------------|----------------|---------------------------------------------------------------|----------|
| 2558670598 | DRAFT_01266 | Protein_length | 160aa                                                         |          |
| 2558670598 | DRAFT_01266 | GC             |                                                               | 0.58     |
| 2558670599 | DRAFT_01267 | pfam13474      | SnoaL_3                                                       | 7.20E-10 |
| 2558670599 | DRAFT_01267 | Locus_type     | CDS                                                           |          |
| 2558670599 | DRAFT_01267 | Product_name   | SnoaL-like domain                                             |          |
| 2558670599 | DRAFT_01267 | Scaffold       | DRAFT_contig_70_192_len_21347_read_count_357287.26            |          |
| 2558670599 | DRAFT_01267 | Coordinates    | 2101..2484(-)                                                 |          |
| 2558670599 | DRAFT_01267 | DNA_length     | 384bp                                                         |          |
| 2558670599 | DRAFT_01267 | Protein_length | 127aa                                                         |          |
| 2558670599 | DRAFT_01267 | GC             |                                                               | 0.52     |
| 2558670600 | DRAFT_01268 | Locus_type     | CDS                                                           |          |
| 2558670600 | DRAFT_01268 | Product_name   | hypothetical protein                                          |          |
| 2558670600 | DRAFT_01268 | Scaffold       | DRAFT_contig_70_192_len_21347_read_count_357287.26            |          |
| 2558670600 | DRAFT_01268 | Coordinates    | 2952..3242(+)                                                 |          |
| 2558670600 | DRAFT_01268 | DNA_length     | 291bp                                                         |          |
| 2558670600 | DRAFT_01268 | Protein_length | 96aa                                                          |          |
| 2558670600 | DRAFT_01268 | GC             |                                                               | 0.56     |
| 2558670600 | DRAFT_01268 | Transmembrane  | Yes                                                           |          |
| 2558670601 | DRAFT_01269 | COG_category   | [C] Energy production and conversion                          |          |
| 2558670601 | DRAFT_01269 | COG2141        | Coenzyme F420-dependent N5,N10-methylene tetrahydromethanopte | 8.00E-52 |
| 2558670601 | DRAFT_01269 | pfam00296      | Bac_luciferase                                                | 2.20E-73 |
| 2558670601 | DRAFT_01269 | TIGR03560      | probable F420-dependent oxidoreductase, Rv1855c family        | 1.20E-75 |
| 2558670601 | DRAFT_01269 | TIGR03619      | probable F420-dependent oxidoreductase, Rv2161c family        | 6.00E-56 |
| 2558670601 | DRAFT_01269 | TIGR03621      | probable F420-dependent oxidoreductase, MSMEG_2516 family     | 1.50E-52 |
| 2558670601 | DRAFT_01269 | Locus_type     | CDS                                                           |          |
| 2558670601 | DRAFT_01269 | Product_name   | probable F420-dependent oxidoreductase, Rv1855c family        |          |
| 2558670601 | DRAFT_01269 | Scaffold       | DRAFT_contig_70_192_len_21347_read_count_357287.26            |          |
| 2558670601 | DRAFT_01269 | Coordinates    | 3346..4290(-)                                                 |          |
| 2558670601 | DRAFT_01269 | DNA_length     | 945bp                                                         |          |
| 2558670601 | DRAFT_01269 | Protein_length | 314aa                                                         |          |
| 2558670601 | DRAFT_01269 | GC             |                                                               | 0.49     |

|            |             |                |                                                    |          |
|------------|-------------|----------------|----------------------------------------------------|----------|
| 2558670602 | DRAFT_01270 | Locus_type     | CDS                                                |          |
| 2558670602 | DRAFT_01270 | Product_name   | hypothetical protein                               |          |
| 2558670602 | DRAFT_01270 | Scaffold       | DRAFT_contig_70_192_len_21347_read_count_357287.26 |          |
| 2558670602 | DRAFT_01270 | Coordinates    | 4562..5221(-)                                      |          |
| 2558670602 | DRAFT_01270 | DNA_length     | 660bp                                              |          |
| 2558670602 | DRAFT_01270 | Protein_length | 219aa                                              |          |
| 2558670602 | DRAFT_01270 | GC             |                                                    | 0.55     |
| 2558670602 | DRAFT_01270 | Transmembrane  | Yes                                                |          |
| 2558670603 | DRAFT_01271 | COG_category   | [S] Function unknown                               |          |
| 2558670603 | DRAFT_01271 | COG5616        | Predicted integral membrane protein                | 1.00E-36 |
| 2558670603 | DRAFT_01271 | pfam13414      | TPR_11                                             | 7.30E-09 |
| 2558670603 | DRAFT_01271 | pfam00211      | Guanylate_cyc                                      | 2.80E-21 |
| 2558670603 | DRAFT_01271 | EC:4.6.1.1     | Adenylate cyclase.                                 |          |
| 2558670603 | DRAFT_01271 | KO:K01768      | adenylate cyclase [EC:4.6.1.1]                     | 0.00E+00 |
| 2558670603 | DRAFT_01271 | Locus_type     | CDS                                                |          |
| 2558670603 | DRAFT_01271 | Product_name   | Predicted integral membrane protein                |          |
| 2558670603 | DRAFT_01271 | Scaffold       | DRAFT_contig_70_192_len_21347_read_count_357287.26 |          |
| 2558670603 | DRAFT_01271 | Coordinates    | 5428..7365(-)                                      |          |
| 2558670603 | DRAFT_01271 | DNA_length     | 1938bp                                             |          |
| 2558670603 | DRAFT_01271 | Protein_length | 645aa                                              |          |
| 2558670603 | DRAFT_01271 | GC             |                                                    | 0.58     |
| 2558670603 | DRAFT_01271 | Fused_gene     | Yes                                                |          |
| 2558670604 | DRAFT_01272 | COG_category   | [R] General function prediction only               |          |
| 2558670604 | DRAFT_01272 | COG5485        | Predicted ester cyclase                            | 1.00E-12 |
| 2558670604 | DRAFT_01272 | pfam07366      | Snoal                                              | 4.90E-32 |
| 2558670604 | DRAFT_01272 | Locus_type     | CDS                                                |          |
| 2558670604 | DRAFT_01272 | Product_name   | Predicted ester cyclase                            |          |
| 2558670604 | DRAFT_01272 | Scaffold       | DRAFT_contig_70_192_len_21347_read_count_357287.26 |          |
| 2558670604 | DRAFT_01272 | Coordinates    | 7560..7970(+)                                      |          |
| 2558670604 | DRAFT_01272 | DNA_length     | 411bp                                              |          |
| 2558670604 | DRAFT_01272 | Protein_length | 136aa                                              |          |

|            |             |                |                                                                 |          |
|------------|-------------|----------------|-----------------------------------------------------------------|----------|
| 2558670604 | DRAFT_01272 | GC             |                                                                 | 0.54     |
| 2558670605 | DRAFT_01273 | Locus_type     | CDS                                                             |          |
| 2558670605 | DRAFT_01273 | Product_name   | hypothetical protein                                            |          |
| 2558670605 | DRAFT_01273 | Scaffold       | DRAFT_contig_70_192_len_21347_read_count_357287.26              |          |
| 2558670605 | DRAFT_01273 | Coordinates    | 8019..8360(-)                                                   |          |
| 2558670605 | DRAFT_01273 | DNA_length     | 342bp                                                           |          |
| 2558670605 | DRAFT_01273 | Protein_length | 113aa                                                           |          |
| 2558670605 | DRAFT_01273 | GC             |                                                                 | 0.43     |
| 2558670605 | DRAFT_01273 | Transmembrane  | Yes                                                             |          |
| 2558670606 | DRAFT_01274 | COG_category   | [S] Function unknown                                            |          |
| 2558670606 | DRAFT_01274 | COG5616        | Predicted integral membrane protein                             | 5.00E-36 |
| 2558670606 | DRAFT_01274 | pfam00211      | Guanylate_cyc                                                   | 4.80E-22 |
| 2558670606 | DRAFT_01274 | pfam13414      | TPR_11                                                          | 1.30E-12 |
| 2558670606 | DRAFT_01274 | pfam13414      | TPR_11                                                          | 1.80E-06 |
| 2558670606 | DRAFT_01274 | EC:4.6.1.1     | Adenylate cyclase.                                              |          |
| 2558670606 | DRAFT_01274 | KO:K01768      | adenylate cyclase [EC:4.6.1.1]                                  | 0.00E+00 |
| 2558670606 | DRAFT_01274 | Locus_type     | CDS                                                             |          |
| 2558670606 | DRAFT_01274 | Product_name   | Predicted integral membrane protein                             |          |
| 2558670606 | DRAFT_01274 | Scaffold       | DRAFT_contig_70_192_len_21347_read_count_357287.26              |          |
| 2558670606 | DRAFT_01274 | Coordinates    | 8516..10444(-)                                                  |          |
| 2558670606 | DRAFT_01274 | DNA_length     | 1929bp                                                          |          |
| 2558670606 | DRAFT_01274 | Protein_length | 642aa                                                           |          |
| 2558670606 | DRAFT_01274 | GC             |                                                                 | 0.56     |
| 2558670607 | DRAFT_01275 | KEGG_module    | M00114: Ascorbate biosynthesis, plants, glucose-6P => ascorbate |          |
| 2558670607 | DRAFT_01275 | KEGG_module    | M00362: Nucleotide sugar biosynthesis, prokaryotes              |          |
| 2558670607 | DRAFT_01275 | KEGG_module    | M00361: Nucleotide sugar biosynthesis, eukaryotes               |          |
| 2558670607 | DRAFT_01275 | Metacyc        | PWY-5659: GDP-mannose biosynthesis                              |          |
| 2558670607 | DRAFT_01275 | Metacyc        | PWY-6082: alginate biosynthesis II                              |          |
| 2558670607 | DRAFT_01275 | Metacyc        | PWY-6073: alginate biosynthesis I                               |          |
| 2558670607 | DRAFT_01275 | Metacyc        | PWY-882: L-ascorbate biosynthesis I (L-galactose pathway)       |          |
| 2558670607 | DRAFT_01275 | pfam00483      | NTP_transferase                                                 | 1.60E-27 |

|            |             |                |                                                                    |           |
|------------|-------------|----------------|--------------------------------------------------------------------|-----------|
| 2558670607 | DRAFT_01275 | EC:2.7.7.13    | Mannose-1-phosphate guanylyltransferase.                           |           |
| 2558670607 | DRAFT_01275 | KO:K00966      | mannose-1-phosphate guanylyltransferase [EC:2.7.7.13]              | 3.00E-40  |
| 2558670607 | DRAFT_01275 | Locus_type     | CDS                                                                |           |
| 2558670607 | DRAFT_01275 | Product_name   | Nucleoside-diphosphate-sugar pyrophosphorylase involved in lipopol |           |
| 2558670607 | DRAFT_01275 | Scaffold       | DRAFT_contig_70_192_len_21347_read_count_357287.26                 |           |
| 2558670607 | DRAFT_01275 | Coordinates    | 10920..11681(+)                                                    |           |
| 2558670607 | DRAFT_01275 | DNA_length     | 762bp                                                              |           |
| 2558670607 | DRAFT_01275 | Protein_length | 253aa                                                              |           |
| 2558670607 | DRAFT_01275 | GC             |                                                                    | 0.58      |
| 2558670608 | DRAFT_01276 | KEGG_module    | M00360: Aminoacyl-tRNA biosynthesis, prokaryotes                   |           |
| 2558670608 | DRAFT_01276 | Metacyc        | TRNA-CHARGING-PWY: tRNA charging                                   |           |
| 2558670608 | DRAFT_01276 | IMG_pathway    | 497: L-lysine ligation to tRNA(Lys)                                |           |
| 2558670608 | DRAFT_01276 | COG_category   | [J] Translation, ribosomal structure and biogenesis                |           |
| 2558670608 | DRAFT_01276 | COG1384        | Lysyl-tRNA synthetase (class I)                                    | 1.00E-92  |
| 2558670608 | DRAFT_01276 | pfam01921      | tRNA-synt_1f                                                       | 6.80E-101 |
| 2558670608 | DRAFT_01276 | EC:6.1.1.6     | Lysine--tRNA ligase.                                               |           |
| 2558670608 | DRAFT_01276 | TIGR00467      | lysyl-tRNA synthetase, archaeal and spirochete                     | 3.20E-76  |
| 2558670608 | DRAFT_01276 | KO:K04566      | lysyl-tRNA synthetase, class I [EC:6.1.1.6]                        | 0.00E+00  |
| 2558670608 | DRAFT_01276 | ITERM:00395    | lysyl-tRNA synthetase, class I (EC 6.1.1.6)                        |           |
| 2558670608 | DRAFT_01276 | Locus_type     | CDS                                                                |           |
| 2558670608 | DRAFT_01276 | Product_name   | lysyl-tRNA synthetase, class I (EC 6.1.1.6)                        |           |
| 2558670608 | DRAFT_01276 | Scaffold       | DRAFT_contig_70_192_len_21347_read_count_357287.26                 |           |
| 2558670608 | DRAFT_01276 | Coordinates    | 11728..13326(-)                                                    |           |
| 2558670608 | DRAFT_01276 | DNA_length     | 1599bp                                                             |           |
| 2558670608 | DRAFT_01276 | Protein_length | 532aa                                                              |           |
| 2558670608 | DRAFT_01276 | GC             |                                                                    | 0.58      |
| 2558670609 | DRAFT_01277 | KEGG_module    | M00400: p97-Ufd1-Npl4 complex                                      |           |
| 2558670609 | DRAFT_01277 | KEGG_module    | M00403: HRD1/SEL1 ERAD complex                                     |           |
| 2558670609 | DRAFT_01277 | COG_category   | [O] Posttranslational modification, protein turnover, chaperones   |           |
| 2558670609 | DRAFT_01277 | COG0464        | ATPases of the AAA+ class                                          | 4.00E-130 |
| 2558670609 | DRAFT_01277 | pfam00004      | AAA                                                                | 1.30E-49  |
| 2558670609 | DRAFT_01277 | pfam02359      | CDC48_N                                                            | 2.30E-29  |

|            |             |                |                                                    |          |
|------------|-------------|----------------|----------------------------------------------------|----------|
| 2558670609 | DRAFT_01277 | pfam00004      | AAA                                                | 1.30E-44 |
| 2558670609 | DRAFT_01277 | pfam02933      | CDC48_2                                            | 1.10E-08 |
| 2558670609 | DRAFT_01277 | TIGR01243      | AAA family ATPase, CDC48 subfamily                 | 0.00E+00 |
| 2558670609 | DRAFT_01277 | KO:K13525      | transitional endoplasmic reticulum ATPase          | 0.00E+00 |
| 2558670609 | DRAFT_01277 | Locus_type     | CDS                                                |          |
| 2558670609 | DRAFT_01277 | Product_name   | AAA family ATPase, CDC48 subfamily                 |          |
| 2558670609 | DRAFT_01277 | Scaffold       | DRAFT_contig_70_192_len_21347_read_count_357287.26 |          |
| 2558670609 | DRAFT_01277 | Coordinates    | 13487..15688(-)                                    |          |
| 2558670609 | DRAFT_01277 | DNA_length     | 2202bp                                             |          |
| 2558670609 | DRAFT_01277 | Protein_length | 733aa                                              |          |
| 2558670609 | DRAFT_01277 | GC             |                                                    | 0.58     |
| 2558670609 | DRAFT_01277 | Fused_gene     | Yes                                                |          |
| 2558670610 | DRAFT_01278 | pfam00011      | HSP20                                              | 7.60E-06 |
| 2558670610 | DRAFT_01278 | KO:K13993      | HSP20 family protein                               | 1.60E-21 |
| 2558670610 | DRAFT_01278 | Locus_type     | CDS                                                |          |
| 2558670610 | DRAFT_01278 | Product_name   | Molecular chaperone (small heat shock protein)     |          |
| 2558670610 | DRAFT_01278 | Scaffold       | DRAFT_contig_70_192_len_21347_read_count_357287.26 |          |
| 2558670610 | DRAFT_01278 | Coordinates    | 15702..16208(-)                                    |          |
| 2558670610 | DRAFT_01278 | DNA_length     | 507bp                                              |          |
| 2558670610 | DRAFT_01278 | Protein_length | 168aa                                              |          |
| 2558670610 | DRAFT_01278 | GC             |                                                    | 0.55     |
| 2558670611 | DRAFT_01279 | COG_category   | [K] Transcription                                  |          |
| 2558670611 | DRAFT_01279 | COG1777        | Predicted transcriptional regulators               | 7.00E-05 |
| 2558670611 | DRAFT_01279 | pfam12840      | HTH_20                                             | 1.10E-08 |
| 2558670611 | DRAFT_01279 | Locus_type     | CDS                                                |          |
| 2558670611 | DRAFT_01279 | Product_name   | Predicted transcriptional regulators               |          |
| 2558670611 | DRAFT_01279 | Scaffold       | DRAFT_contig_70_192_len_21347_read_count_357287.26 |          |
| 2558670611 | DRAFT_01279 | Coordinates    | 16220..16900(+)                                    |          |
| 2558670611 | DRAFT_01279 | DNA_length     | 681bp                                              |          |
| 2558670611 | DRAFT_01279 | Protein_length | 226aa                                              |          |
| 2558670611 | DRAFT_01279 | GC             |                                                    | 0.57     |

|            |             |                |                                                    |          |
|------------|-------------|----------------|----------------------------------------------------|----------|
| 2558670612 | DRAFT_01280 | Locus_type     | CDS                                                |          |
| 2558670612 | DRAFT_01280 | Product_name   | hypothetical protein                               |          |
| 2558670612 | DRAFT_01280 | Scaffold       | DRAFT_contig_70_192_len_21347_read_count_357287.26 |          |
| 2558670612 | DRAFT_01280 | Coordinates    | 17004..17507(+)                                    |          |
| 2558670612 | DRAFT_01280 | DNA_length     | 504bp                                              |          |
| 2558670612 | DRAFT_01280 | Protein_length | 167aa                                              |          |
| 2558670612 | DRAFT_01280 | GC             |                                                    | 0.59     |
| 2558670612 | DRAFT_01280 | Transmembrane  | Yes                                                |          |
| 2558670613 | DRAFT_01281 | COG_category   | [R] General function prediction only               |          |
| 2558670613 | DRAFT_01281 | COG1245        | Predicted ATPase, RNase L inhibitor (RLI) homolog  | 0.00E+00 |
| 2558670613 | DRAFT_01281 | pfam04068      | RLI                                                | 2.00E-08 |
| 2558670613 | DRAFT_01281 | pfam00037      | Fer4                                               | 1.10E-08 |
| 2558670613 | DRAFT_01281 | pfam00005      | ABC_tran                                           | 7.50E-19 |
| 2558670613 | DRAFT_01281 | pfam00005      | ABC_tran                                           | 8.90E-16 |
| 2558670613 | DRAFT_01281 | KO:K06174      | ATP-binding cassette, sub-family E, member 1       | 0.00E+00 |
| 2558670613 | DRAFT_01281 | Locus_type     | CDS                                                |          |
| 2558670613 | DRAFT_01281 | Product_name   | Predicted ATPase, RNase L inhibitor (RLI) homolog  |          |
| 2558670613 | DRAFT_01281 | Scaffold       | DRAFT_contig_70_192_len_21347_read_count_357287.26 |          |
| 2558670613 | DRAFT_01281 | Coordinates    | 17518..19344(+)                                    |          |
| 2558670613 | DRAFT_01281 | DNA_length     | 1827bp                                             |          |
| 2558670613 | DRAFT_01281 | Protein_length | 608aa                                              |          |
| 2558670613 | DRAFT_01281 | GC             |                                                    | 0.59     |
| 2558670614 | DRAFT_01282 | Locus_type     | CDS                                                |          |
| 2558670614 | DRAFT_01282 | Product_name   | hypothetical protein                               |          |
| 2558670614 | DRAFT_01282 | Scaffold       | DRAFT_contig_70_192_len_21347_read_count_357287.26 |          |
| 2558670614 | DRAFT_01282 | Coordinates    | 19452..19964(+)                                    |          |
| 2558670614 | DRAFT_01282 | DNA_length     | 513bp                                              |          |
| 2558670614 | DRAFT_01282 | Protein_length | 170aa                                              |          |
| 2558670614 | DRAFT_01282 | GC             |                                                    | 0.59     |
| 2558670614 | DRAFT_01282 | Transmembrane  | Yes                                                |          |
| 2558670615 | DRAFT_01283 | Locus_type     | CDS                                                |          |



|            |             |                |                                                                       |          |
|------------|-------------|----------------|-----------------------------------------------------------------------|----------|
| 2558670615 | DRAFT_01283 | Product_name   | hypothetical protein                                                  |          |
| 2558670615 | DRAFT_01283 | Scaffold       | DRAFT_contig_70_192_len_21347_read_count_357287.26                    |          |
| 2558670615 | DRAFT_01283 | Coordinates    | 19961..20125(+)                                                       |          |
| 2558670615 | DRAFT_01283 | DNA_length     | 165bp                                                                 |          |
| 2558670615 | DRAFT_01283 | Protein_length | 54aa                                                                  |          |
| 2558670615 | DRAFT_01283 | GC             |                                                                       | 0.6      |
|            |             |                |                                                                       |          |
| 2558670616 | DRAFT_01284 | KEGG_module    | M00239: Peptides/nickel transport system                              |          |
| 2558670616 | DRAFT_01284 | COG_category   | [E] Amino acid transport and metabolism                               |          |
| 2558670616 | DRAFT_01284 | COG4608        | ABC-type oligopeptide transport system, ATPase component              | 2.00E-93 |
| 2558670616 | DRAFT_01284 | pfam08352      | oligo_HPY                                                             | 5.40E-20 |
| 2558670616 | DRAFT_01284 | pfam00005      | ABC_tran                                                              | 2.10E-29 |
| 2558670616 | DRAFT_01284 | TIGR01727      | oligopeptide/dipeptide ABC transporter, ATP-binding protein, C-termin | 2.10E-31 |
| 2558670616 | DRAFT_01284 | KO:K02032      | peptide/nickel transport system ATP-binding protein                   | 0.00E+00 |
| 2558670616 | DRAFT_01284 | Locus_type     | CDS                                                                   |          |
| 2558670616 | DRAFT_01284 | Product_name   | oligopeptide/dipeptide ABC transporter, ATP-binding protein, C-termi  |          |
| 2558670616 | DRAFT_01284 | Scaffold       | DRAFT_contig_70_192_len_21347_read_count_357287.26                    |          |
| 2558670616 | DRAFT_01284 | Coordinates    | 20198..21274(-)                                                       |          |
| 2558670616 | DRAFT_01284 | DNA_length     | 1077bp                                                                |          |
| 2558670616 | DRAFT_01284 | Protein_length | 358aa                                                                 |          |
| 2558670616 | DRAFT_01284 | GC             |                                                                       | 0.6      |
|            |             |                |                                                                       |          |
| 2558670617 | DRAFT_01285 | pfam12849      | PBP_like_2                                                            | 1.60E-31 |
| 2558670617 | DRAFT_01285 | Locus_type     | CDS                                                                   |          |
| 2558670617 | DRAFT_01285 | Product_name   | ABC-type phosphate transport system, periplasmic component            |          |
| 2558670617 | DRAFT_01285 | Scaffold       | DRAFT_contig_70_197_len_20500_read_count_357023.27                    |          |
| 2558670617 | DRAFT_01285 | Coordinates    | 3..752(-)                                                             |          |
| 2558670617 | DRAFT_01285 | DNA_length     | 750bp                                                                 |          |
| 2558670617 | DRAFT_01285 | Protein_length | 250aa                                                                 |          |
| 2558670617 | DRAFT_01285 | GC             |                                                                       | 0.57     |
| 2558670617 | DRAFT_01285 | Signal_peptide | Yes                                                                   |          |
| 2558670617 | DRAFT_01285 | Transmembrane  | Yes                                                                   |          |
|            |             |                |                                                                       |          |
| 2558670618 | DRAFT_01286 | Locus_type     | CDS                                                                   |          |

|            |             |                |                                                    |          |
|------------|-------------|----------------|----------------------------------------------------|----------|
| 2558670618 | DRAFT_01286 | Product_name   | hypothetical protein                               |          |
| 2558670618 | DRAFT_01286 | Scaffold       | DRAFT_contig_70_197_len_20500_read_count_357023.27 |          |
| 2558670618 | DRAFT_01286 | Coordinates    | 1617..1952(-)                                      |          |
| 2558670618 | DRAFT_01286 | DNA_length     | 336bp                                              |          |
| 2558670618 | DRAFT_01286 | Protein_length | 111aa                                              |          |
| 2558670618 | DRAFT_01286 | GC             |                                                    | 0.54     |
|            |             |                |                                                    |          |
| 2558670619 | DRAFT_01287 | Locus_type     | CDS                                                |          |
| 2558670619 | DRAFT_01287 | Product_name   | hypothetical protein                               |          |
| 2558670619 | DRAFT_01287 | Scaffold       | DRAFT_contig_70_197_len_20500_read_count_357023.27 |          |
| 2558670619 | DRAFT_01287 | Coordinates    | 2031..2495(-)                                      |          |
| 2558670619 | DRAFT_01287 | DNA_length     | 465bp                                              |          |
| 2558670619 | DRAFT_01287 | Protein_length | 154aa                                              |          |
| 2558670619 | DRAFT_01287 | GC             |                                                    | 0.56     |
|            |             |                |                                                    |          |
| 2558670620 | DRAFT_01288 | Locus_type     | CDS                                                |          |
| 2558670620 | DRAFT_01288 | Product_name   | hypothetical protein                               |          |
| 2558670620 | DRAFT_01288 | Scaffold       | DRAFT_contig_70_197_len_20500_read_count_357023.27 |          |
| 2558670620 | DRAFT_01288 | Coordinates    | 3008..3427(-)                                      |          |
| 2558670620 | DRAFT_01288 | DNA_length     | 420bp                                              |          |
| 2558670620 | DRAFT_01288 | Protein_length | 139aa                                              |          |
| 2558670620 | DRAFT_01288 | GC             |                                                    | 0.53     |
|            |             |                |                                                    |          |
| 2558670621 | DRAFT_01289 | COG_category   | [K] Transcription                                  |          |
| 2558670621 | DRAFT_01289 | COG1378        | Predicted transcriptional regulators               | 2.00E-28 |
| 2558670621 | DRAFT_01289 | pfam11495      | Regulator_TrmB                                     | 2.60E-08 |
| 2558670621 | DRAFT_01289 | pfam01978      | TrmB                                               | 4.10E-24 |
| 2558670621 | DRAFT_01289 | Locus_type     | CDS                                                |          |
| 2558670621 | DRAFT_01289 | Product_name   | Predicted transcriptional regulators               |          |
| 2558670621 | DRAFT_01289 | Scaffold       | DRAFT_contig_70_197_len_20500_read_count_357023.27 |          |
| 2558670621 | DRAFT_01289 | Coordinates    | 3672..4472(-)                                      |          |
| 2558670621 | DRAFT_01289 | DNA_length     | 801bp                                              |          |
| 2558670621 | DRAFT_01289 | Protein_length | 266aa                                              |          |
| 2558670621 | DRAFT_01289 | GC             |                                                    | 0.57     |

|            |             |                |                                                    |          |
|------------|-------------|----------------|----------------------------------------------------|----------|
| 2558670622 | DRAFT_01290 | COG_category   | [R] General function prediction only               |          |
| 2558670622 | DRAFT_01290 | COG1964        | Predicted Fe-S oxidoreductases                     | 0.00E+00 |
| 2558670622 | DRAFT_01290 | pfam04055      | Radical_SAM                                        | 2.60E-19 |
| 2558670622 | DRAFT_01290 | pfam13394      | Fer4_14                                            | 9.80E-07 |
| 2558670622 | DRAFT_01290 | Locus_type     | CDS                                                |          |
| 2558670622 | DRAFT_01290 | Product_name   | Predicted Fe-S oxidoreductases                     |          |
| 2558670622 | DRAFT_01290 | Scaffold       | DRAFT_contig_70_197_len_20500_read_count_357023.27 |          |
| 2558670622 | DRAFT_01290 | Coordinates    | 4818..6491(+)                                      |          |
| 2558670622 | DRAFT_01290 | DNA_length     | 1674bp                                             |          |
| 2558670622 | DRAFT_01290 | Protein_length | 557aa                                              |          |
| 2558670622 | DRAFT_01290 | GC             |                                                    | 0.55     |
| 2558670623 | DRAFT_01291 | Locus_type     | CDS                                                |          |
| 2558670623 | DRAFT_01291 | Product_name   | hypothetical protein                               |          |
| 2558670623 | DRAFT_01291 | Scaffold       | DRAFT_contig_70_197_len_20500_read_count_357023.27 |          |
| 2558670623 | DRAFT_01291 | Coordinates    | 6642..7394(-)                                      |          |
| 2558670623 | DRAFT_01291 | DNA_length     | 753bp                                              |          |
| 2558670623 | DRAFT_01291 | Protein_length | 250aa                                              |          |
| 2558670623 | DRAFT_01291 | GC             |                                                    | 0.56     |
| 2558670624 | DRAFT_01292 | COG_category   | [R] General function prediction only               |          |
| 2558670624 | DRAFT_01292 | COG2047        | Uncharacterized protein (ATP-grasp superfamily)    | 5.00E-17 |
| 2558670624 | DRAFT_01292 | pfam09754      | PAC2                                               | 1.60E-11 |
| 2558670624 | DRAFT_01292 | Locus_type     | CDS                                                |          |
| 2558670624 | DRAFT_01292 | Product_name   | Uncharacterized protein (ATP-grasp superfamily)    |          |
| 2558670624 | DRAFT_01292 | Scaffold       | DRAFT_contig_70_197_len_20500_read_count_357023.27 |          |
| 2558670624 | DRAFT_01292 | Coordinates    | 7666..8391(-)                                      |          |
| 2558670624 | DRAFT_01292 | DNA_length     | 726bp                                              |          |
| 2558670624 | DRAFT_01292 | Protein_length | 241aa                                              |          |
| 2558670624 | DRAFT_01292 | GC             |                                                    | 0.6      |
| 2558670625 | DRAFT_01293 | COG_category   | [L] Replication, recombination and repair          |          |
| 2558670625 | DRAFT_01293 | COG3569        | Topoisomerase IB                                   | 2.00E-14 |

|            |             |                |                                                                  |          |
|------------|-------------|----------------|------------------------------------------------------------------|----------|
| 2558670625 | DRAFT_01293 | pfam14370      | Topo_C_assoc                                                     | 2.50E-18 |
| 2558670625 | DRAFT_01293 | pfam02919      | Topoisom_I_N                                                     | 2.20E-60 |
| 2558670625 | DRAFT_01293 | pfam01028      | Topoisom_I                                                       | 7.70E-62 |
| 2558670625 | DRAFT_01293 | EC:5.99.1.2    | DNA topoisomerase.                                               |          |
| 2558670625 | DRAFT_01293 | KO:K03163      | DNA topoisomerase I [EC:5.99.1.2]                                | 0.00E+00 |
| 2558670625 | DRAFT_01293 | Locus_type     | CDS                                                              |          |
| 2558670625 | DRAFT_01293 | Product_name   | Topoisomerase IB                                                 |          |
| 2558670625 | DRAFT_01293 | Scaffold       | DRAFT_contig_70_197_len_20500_read_count_357023.27               |          |
| 2558670625 | DRAFT_01293 | Coordinates    | 8516..10093(+)                                                   |          |
| 2558670625 | DRAFT_01293 | DNA_length     | 1578bp                                                           |          |
| 2558670625 | DRAFT_01293 | Protein_length | 525aa                                                            |          |
| 2558670625 | DRAFT_01293 | GC             |                                                                  | 0.57     |
|            |             |                |                                                                  |          |
| 2558670626 | DRAFT_01294 | COG_category   | [O] Posttranslational modification, protein turnover, chaperones |          |
| 2558670626 | DRAFT_01294 | COG0309        | Hydrogenase maturation factor                                    | 5.00E-62 |
| 2558670626 | DRAFT_01294 | pfam00586      | AIRS                                                             | 3.70E-06 |
| 2558670626 | DRAFT_01294 | pfam02769      | AIRS_C                                                           | 7.20E-22 |
| 2558670626 | DRAFT_01294 | Locus_type     | CDS                                                              |          |
| 2558670626 | DRAFT_01294 | Product_name   | Hydrogenase maturation factor                                    |          |
| 2558670626 | DRAFT_01294 | Scaffold       | DRAFT_contig_70_197_len_20500_read_count_357023.27               |          |
| 2558670626 | DRAFT_01294 | Coordinates    | 10064..11059(-)                                                  |          |
| 2558670626 | DRAFT_01294 | DNA_length     | 996bp                                                            |          |
| 2558670626 | DRAFT_01294 | Protein_length | 331aa                                                            |          |
| 2558670626 | DRAFT_01294 | GC             |                                                                  | 0.61     |
|            |             |                |                                                                  |          |
| 2558670627 | DRAFT_01295 | COG_category   | [S] Function unknown                                             |          |
| 2558670627 | DRAFT_01295 | COG4720        | Predicted membrane protein                                       | 8.00E-12 |
| 2558670627 | DRAFT_01295 | pfam07155      | ECF-ribofla_trS                                                  | 1.60E-26 |
| 2558670627 | DRAFT_01295 | pfam07155      | ECF-ribofla_trS                                                  | 3.80E-06 |
| 2558670627 | DRAFT_01295 | Locus_type     | CDS                                                              |          |
| 2558670627 | DRAFT_01295 | Product_name   | Predicted membrane protein                                       |          |
| 2558670627 | DRAFT_01295 | Scaffold       | DRAFT_contig_70_197_len_20500_read_count_357023.27               |          |
| 2558670627 | DRAFT_01295 | Coordinates    | 11056..11889(-)                                                  |          |
| 2558670627 | DRAFT_01295 | DNA_length     | 834bp                                                            |          |

|            |             |                |                                                                      |          |
|------------|-------------|----------------|----------------------------------------------------------------------|----------|
| 2558670627 | DRAFT_01295 | Protein_length | 277aa                                                                |          |
| 2558670627 | DRAFT_01295 | GC             |                                                                      | 0.55     |
| 2558670627 | DRAFT_01295 | Transmembrane  | Yes                                                                  |          |
| 2558670628 | DRAFT_01296 | KEGG_module    | M00018: Threonine biosynthesis, aspartate => homoserine => threonine |          |
| 2558670628 | DRAFT_01296 | Metacyc        | HOMOSER-THRESYN-PWY: threonine biosynthesis from homoserine          |          |
| 2558670628 | DRAFT_01296 | IMG_pathway    | 133: L-threonine synthesis from L-homoserine                         |          |
| 2558670628 | DRAFT_01296 | COG_category   | [E] Amino acid transport and metabolism                              |          |
| 2558670628 | DRAFT_01296 | COG0498        | Threonine synthase                                                   | 2.00E-65 |
| 2558670628 | DRAFT_01296 | pfam03551      | PadR                                                                 | 1.50E-09 |
| 2558670628 | DRAFT_01296 | pfam00291      | PALP                                                                 | 2.20E-55 |
| 2558670628 | DRAFT_01296 | EC:4.2.3.1     | Threonine synthase.                                                  |          |
| 2558670628 | DRAFT_01296 | TIGR00260      | threonine synthase                                                   | 3.90E-46 |
| 2558670628 | DRAFT_01296 | KO:K01733      | threonine synthase [EC:4.2.3.1]                                      | 0.00E+00 |
| 2558670628 | DRAFT_01296 | ITERM:00220    | L-threonine synthase (EC 4.2.3.1)                                    |          |
| 2558670628 | DRAFT_01296 | Locus_type     | CDS                                                                  |          |
| 2558670628 | DRAFT_01296 | Product_name   | L-threonine synthase (EC 4.2.3.1)                                    |          |
| 2558670628 | DRAFT_01296 | Scaffold       | DRAFT_contig_70_197_len_20500_read_count_357023.27                   |          |
| 2558670628 | DRAFT_01296 | Coordinates    | 12005..13435(+)                                                      |          |
| 2558670628 | DRAFT_01296 | DNA_length     | 1431bp                                                               |          |
| 2558670628 | DRAFT_01296 | Protein_length | 476aa                                                                |          |
| 2558670628 | DRAFT_01296 | GC             |                                                                      | 0.59     |
| 2558670629 | DRAFT_01297 | pfam01944      | DUF95                                                                | 1.10E-07 |
| 2558670629 | DRAFT_01297 | Locus_type     | CDS                                                                  |          |
| 2558670629 | DRAFT_01297 | Product_name   | Integral membrane protein DUF95                                      |          |
| 2558670629 | DRAFT_01297 | Scaffold       | DRAFT_contig_70_197_len_20500_read_count_357023.27                   |          |
| 2558670629 | DRAFT_01297 | Coordinates    | 13476..14159(-)                                                      |          |
| 2558670629 | DRAFT_01297 | DNA_length     | 684bp                                                                |          |
| 2558670629 | DRAFT_01297 | Protein_length | 227aa                                                                |          |
| 2558670629 | DRAFT_01297 | GC             |                                                                      | 0.58     |
| 2558670629 | DRAFT_01297 | Transmembrane  | Yes                                                                  |          |
| 2558670630 | DRAFT_01298 | COG_category   | [S] Function unknown                                                 |          |

|            |             |                |                                                    |          |
|------------|-------------|----------------|----------------------------------------------------|----------|
| 2558670630 | DRAFT_01298 | COG1814        | Uncharacterized membrane protein                   | 2.00E-08 |
| 2558670630 | DRAFT_01298 | pfam01988      | VIT1                                               | 1.50E-31 |
| 2558670630 | DRAFT_01298 | Locus_type     | CDS                                                |          |
| 2558670630 | DRAFT_01298 | Product_name   | Uncharacterized membrane protein                   |          |
| 2558670630 | DRAFT_01298 | Scaffold       | DRAFT_contig_70_197_len_20500_read_count_357023.27 |          |
| 2558670630 | DRAFT_01298 | Coordinates    | 14204..14806(-)                                    |          |
| 2558670630 | DRAFT_01298 | DNA_length     | 603bp                                              |          |
| 2558670630 | DRAFT_01298 | Protein_length | 200aa                                              |          |
| 2558670630 | DRAFT_01298 | GC             |                                                    | 0.56     |
| 2558670630 | DRAFT_01298 | Transmembrane  | Yes                                                |          |
| 2558670631 | DRAFT_01299 | Locus_type     | CDS                                                |          |
| 2558670631 | DRAFT_01299 | Product_name   | hypothetical protein                               |          |
| 2558670631 | DRAFT_01299 | Scaffold       | DRAFT_contig_70_197_len_20500_read_count_357023.27 |          |
| 2558670631 | DRAFT_01299 | Coordinates    | 15084..15206(+)                                    |          |
| 2558670631 | DRAFT_01299 | DNA_length     | 123bp                                              |          |
| 2558670631 | DRAFT_01299 | Protein_length | 40aa                                               |          |
| 2558670631 | DRAFT_01299 | GC             |                                                    | 0.54     |
| 2558670631 | DRAFT_01299 | Transmembrane  | Yes                                                |          |
| 2558670632 | DRAFT_01300 | Locus_type     | CDS                                                |          |
| 2558670632 | DRAFT_01300 | Product_name   | hypothetical protein                               |          |
| 2558670632 | DRAFT_01300 | Scaffold       | DRAFT_contig_70_197_len_20500_read_count_357023.27 |          |
| 2558670632 | DRAFT_01300 | Coordinates    | 15213..16355(-)                                    |          |
| 2558670632 | DRAFT_01300 | DNA_length     | 1143bp                                             |          |
| 2558670632 | DRAFT_01300 | Protein_length | 380aa                                              |          |
| 2558670632 | DRAFT_01300 | GC             |                                                    | 0.53     |
| 2558670633 | DRAFT_01301 | Locus_type     | CDS                                                |          |
| 2558670633 | DRAFT_01301 | Product_name   | hypothetical protein                               |          |
| 2558670633 | DRAFT_01301 | Scaffold       | DRAFT_contig_70_197_len_20500_read_count_357023.27 |          |
| 2558670633 | DRAFT_01301 | Coordinates    | 16798..17361(+)                                    |          |
| 2558670633 | DRAFT_01301 | DNA_length     | 564bp                                              |          |
| 2558670633 | DRAFT_01301 | Protein_length | 187aa                                              |          |

|            |             |                |                                                                  |          |
|------------|-------------|----------------|------------------------------------------------------------------|----------|
| 2558670633 | DRAFT_01301 | GC             |                                                                  | 0.56     |
| 2558670634 | DRAFT_01302 | COG_category   | [O] Posttranslational modification, protein turnover, chaperones |          |
| 2558670634 | DRAFT_01302 | COG1765        | Predicted redox protein, regulator of disulfide bond formation   | 1.00E-17 |
| 2558670634 | DRAFT_01302 | pfam02566      | OsmC                                                             | 1.50E-14 |
| 2558670634 | DRAFT_01302 | KO:K07397      | putative redox protein                                           | 2.40E-19 |
| 2558670634 | DRAFT_01302 | Locus_type     | CDS                                                              |          |
| 2558670634 | DRAFT_01302 | Product_name   | Predicted redox protein, regulator of disulfide bond formation   |          |
| 2558670634 | DRAFT_01302 | Scaffold       | DRAFT_contig_70_197_len_20500_read_count_357023.27               |          |
| 2558670634 | DRAFT_01302 | Coordinates    | 17462..17776(+)                                                  |          |
| 2558670634 | DRAFT_01302 | DNA_length     | 315bp                                                            |          |
| 2558670634 | DRAFT_01302 | Protein_length | 104aa                                                            |          |
| 2558670634 | DRAFT_01302 | GC             |                                                                  | 0.57     |
| 2558670634 | DRAFT_01302 | Transmembrane  | Yes                                                              |          |
| 2558670635 | DRAFT_01303 | COG_category   | [C] Energy production and conversion                             |          |
| 2558670635 | DRAFT_01303 | COG_category   | [R] General function prediction only                             |          |
| 2558670635 | DRAFT_01303 | COG0604        | NADPH:quinone reductase and related Zn-dependent oxidoreductases | 2.00E-77 |
| 2558670635 | DRAFT_01303 | pfam08240      | ADH_N                                                            | 4.10E-26 |
| 2558670635 | DRAFT_01303 | pfam00107      | ADH_zinc_N                                                       | 3.00E-38 |
| 2558670635 | DRAFT_01303 | Locus_type     | CDS                                                              |          |
| 2558670635 | DRAFT_01303 | Product_name   | NADPH:quinone reductase and related Zn-dependent oxidoreductase  |          |
| 2558670635 | DRAFT_01303 | Scaffold       | DRAFT_contig_70_197_len_20500_read_count_357023.27               |          |
| 2558670635 | DRAFT_01303 | Coordinates    | 17773..18801(-)                                                  |          |
| 2558670635 | DRAFT_01303 | DNA_length     | 1029bp                                                           |          |
| 2558670635 | DRAFT_01303 | Protein_length | 342aa                                                            |          |
| 2558670635 | DRAFT_01303 | GC             |                                                                  | 0.6      |
| 2558670636 | DRAFT_01304 | Locus_type     | CDS                                                              |          |
| 2558670636 | DRAFT_01304 | Product_name   | hypothetical protein                                             |          |
| 2558670636 | DRAFT_01304 | Scaffold       | DRAFT_contig_70_197_len_20500_read_count_357023.27               |          |
| 2558670636 | DRAFT_01304 | Coordinates    | 19286..19510(+)                                                  |          |
| 2558670636 | DRAFT_01304 | DNA_length     | 225bp                                                            |          |
| 2558670636 | DRAFT_01304 | Protein_length | 74aa                                                             |          |

|            |             |                |                                                    |          |
|------------|-------------|----------------|----------------------------------------------------|----------|
| 2558670636 | DRAFT_01304 | GC             |                                                    | 0.49     |
| 2558670637 | DRAFT_01305 | Locus_type     | CDS                                                |          |
| 2558670637 | DRAFT_01305 | Product_name   | hypothetical protein                               |          |
| 2558670637 | DRAFT_01305 | Scaffold       | DRAFT_contig_70_197_len_20500_read_count_357023.27 |          |
| 2558670637 | DRAFT_01305 | Coordinates    | 19631..20497(+)                                    |          |
| 2558670637 | DRAFT_01305 | DNA_length     | 867bp                                              |          |
| 2558670637 | DRAFT_01305 | Protein_length | 289aa                                              |          |
| 2558670637 | DRAFT_01305 | GC             |                                                    | 0.54     |
| 2558670638 | DRAFT_01306 | Locus_type     | CDS                                                |          |
| 2558670638 | DRAFT_01306 | Product_name   | hypothetical protein                               |          |
| 2558670638 | DRAFT_01306 | Scaffold       | DRAFT_contig_70_219_len_19329_read_count_354966.28 |          |
| 2558670638 | DRAFT_01306 | Coordinates    | 53..973(+)                                         |          |
| 2558670638 | DRAFT_01306 | DNA_length     | 921bp                                              |          |
| 2558670638 | DRAFT_01306 | Protein_length | 306aa                                              |          |
| 2558670638 | DRAFT_01306 | GC             |                                                    | 0.55     |
| 2558670638 | DRAFT_01306 | Transmembrane  | Yes                                                |          |
| 2558670639 | DRAFT_01307 | Locus_type     | CDS                                                |          |
| 2558670639 | DRAFT_01307 | Product_name   | hypothetical protein                               |          |
| 2558670639 | DRAFT_01307 | Scaffold       | DRAFT_contig_70_219_len_19329_read_count_354966.28 |          |
| 2558670639 | DRAFT_01307 | Coordinates    | 1159..3102(-)                                      |          |
| 2558670639 | DRAFT_01307 | DNA_length     | 1944bp                                             |          |
| 2558670639 | DRAFT_01307 | Protein_length | 647aa                                              |          |
| 2558670639 | DRAFT_01307 | GC             |                                                    | 0.58     |
| 2558670639 | DRAFT_01307 | Transmembrane  | Yes                                                |          |
| 2558670640 | DRAFT_01308 | pfam05048      | NosD                                               | 5.90E-23 |
| 2558670640 | DRAFT_01308 | TIGR03804      | parallel beta-helix repeat (two copies)            | 2.30E-13 |
| 2558670640 | DRAFT_01308 | Locus_type     | CDS                                                |          |
| 2558670640 | DRAFT_01308 | Product_name   | parallel beta-helix repeat (two copies)            |          |
| 2558670640 | DRAFT_01308 | Scaffold       | DRAFT_contig_70_219_len_19329_read_count_354966.28 |          |
| 2558670640 | DRAFT_01308 | Coordinates    | 3422..4417(+)                                      |          |



|            |             |                |                                                                      |          |
|------------|-------------|----------------|----------------------------------------------------------------------|----------|
| 2558670640 | DRAFT_01308 | DNA_length     | 996bp                                                                |          |
| 2558670640 | DRAFT_01308 | Protein_length | 331aa                                                                |          |
| 2558670640 | DRAFT_01308 | GC             |                                                                      | 0.54     |
| 2558670640 | DRAFT_01308 | Transmembrane  | Yes                                                                  |          |
| 2558670641 | DRAFT_01309 | KEGG_module    | M00362: Nucleotide sugar biosynthesis, prokaryotes                   |          |
| 2558670641 | DRAFT_01309 | KEGG_module    | M00361: Nucleotide sugar biosynthesis, eukaryotes                    |          |
| 2558670641 | DRAFT_01309 | Metacyc        | PWY-3821: galactose degradation III                                  |          |
| 2558670641 | DRAFT_01309 | Metacyc        | PWY-6317: galactose degradation I (Leloir pathway)                   |          |
| 2558670641 | DRAFT_01309 | Metacyc        | PWY-6397: mycolyl-arabinogalactan-peptidoglycan complex biosynthesis |          |
| 2558670641 | DRAFT_01309 | Metacyc        | COLANSYN-PWY: colanic acid building blocks biosynthesis              |          |
| 2558670641 | DRAFT_01309 | Metacyc        | PWY-6527: stachyose degradation                                      |          |
| 2558670641 | DRAFT_01309 | COG_category   | [G] Carbohydrate transport and metabolism                            |          |
| 2558670641 | DRAFT_01309 | COG_category   | [M] Cell wall/membrane/envelope biogenesis                           |          |
| 2558670641 | DRAFT_01309 | COG0451        | Nucleoside-diphosphate-sugar epimerases                              | 2.00E-58 |
| 2558670641 | DRAFT_01309 | pfam01370      | Epimerase                                                            | 1.00E-63 |
| 2558670641 | DRAFT_01309 | EC:5.1.3.2     | UDP-glucose 4-epimerase.                                             |          |
| 2558670641 | DRAFT_01309 | KO:K01784      | UDP-glucose 4-epimerase [EC:5.1.3.2]                                 | 0.00E+00 |
| 2558670641 | DRAFT_01309 | Locus_type     | CDS                                                                  |          |
| 2558670641 | DRAFT_01309 | Product_name   | Nucleoside-diphosphate-sugar epimerases                              |          |
| 2558670641 | DRAFT_01309 | Scaffold       | DRAFT_contig_70_219_len_19329_read_count_354966.28                   |          |
| 2558670641 | DRAFT_01309 | Coordinates    | 4803..5726(+)                                                        |          |
| 2558670641 | DRAFT_01309 | DNA_length     | 924bp                                                                |          |
| 2558670641 | DRAFT_01309 | Protein_length | 307aa                                                                |          |
| 2558670641 | DRAFT_01309 | GC             |                                                                      | 0.55     |
| 2558670642 | DRAFT_01310 | pfam00535      | Glycos_transf_2                                                      | 1.80E-23 |
| 2558670642 | DRAFT_01310 | Locus_type     | CDS                                                                  |          |
| 2558670642 | DRAFT_01310 | Product_name   | Glycosyltransferases involved in cell wall biogenesis                |          |
| 2558670642 | DRAFT_01310 | Scaffold       | DRAFT_contig_70_219_len_19329_read_count_354966.28                   |          |
| 2558670642 | DRAFT_01310 | Coordinates    | 5737..6585(+)                                                        |          |
| 2558670642 | DRAFT_01310 | DNA_length     | 849bp                                                                |          |
| 2558670642 | DRAFT_01310 | Protein_length | 282aa                                                                |          |
| 2558670642 | DRAFT_01310 | GC             |                                                                      | 0.54     |

|            |             |                |                                                              |          |
|------------|-------------|----------------|--------------------------------------------------------------|----------|
| 2558670642 | DRAFT_01310 | Transmembrane  | Yes                                                          |          |
| 2558670643 | DRAFT_01311 | COG_category   | [M] Cell wall/membrane/envelope biogenesis                   |          |
| 2558670643 | DRAFT_01311 | COG0438        | Glycosyltransferase                                          | 9.00E-30 |
| 2558670643 | DRAFT_01311 | pfam00534      | Glycos_transf_1                                              | 1.90E-22 |
| 2558670643 | DRAFT_01311 | Locus_type     | CDS                                                          |          |
| 2558670643 | DRAFT_01311 | Product_name   | Glycosyltransferase                                          |          |
| 2558670643 | DRAFT_01311 | Scaffold       | DRAFT_contig_70_219_len_19329_read_count_354966.28           |          |
| 2558670643 | DRAFT_01311 | Coordinates    | 6552..7871(+)                                                |          |
| 2558670643 | DRAFT_01311 | DNA_length     | 1320bp                                                       |          |
| 2558670643 | DRAFT_01311 | Protein_length | 439aa                                                        |          |
| 2558670643 | DRAFT_01311 | GC             |                                                              | 0.54     |
| 2558670643 | DRAFT_01311 | Transmembrane  | Yes                                                          |          |
| 2558670644 | DRAFT_01312 | COG_category   | [M] Cell wall/membrane/envelope biogenesis                   |          |
| 2558670644 | DRAFT_01312 | COG0438        | Glycosyltransferase                                          | 3.00E-15 |
| 2558670644 | DRAFT_01312 | pfam13579      | Glyco_trans_4_4                                              | 5.00E-10 |
| 2558670644 | DRAFT_01312 | pfam13692      | Glyco_trans_1_4                                              | 6.10E-09 |
| 2558670644 | DRAFT_01312 | Locus_type     | CDS                                                          |          |
| 2558670644 | DRAFT_01312 | Product_name   | Glycosyltransferase                                          |          |
| 2558670644 | DRAFT_01312 | Scaffold       | DRAFT_contig_70_219_len_19329_read_count_354966.28           |          |
| 2558670644 | DRAFT_01312 | Coordinates    | 7950..9062(+)                                                |          |
| 2558670644 | DRAFT_01312 | DNA_length     | 1113bp                                                       |          |
| 2558670644 | DRAFT_01312 | Protein_length | 370aa                                                        |          |
| 2558670644 | DRAFT_01312 | GC             |                                                              | 0.52     |
| 2558670644 | DRAFT_01312 | Transmembrane  | Yes                                                          |          |
| 2558670645 | DRAFT_01313 | KEGG_module    | M00362: Nucleotide sugar biosynthesis, prokaryotes           |          |
| 2558670645 | DRAFT_01313 | Metacyc        | ECASYN-PWY: enterobacterial common antigen biosynthesis      |          |
| 2558670645 | DRAFT_01313 | Metacyc        | TEICHOICACID-PWY: teichoic acid (poly-glycerol) biosynthesis |          |
| 2558670645 | DRAFT_01313 | COG_category   | [M] Cell wall/membrane/envelope biogenesis                   |          |
| 2558670645 | DRAFT_01313 | COG0381        | UDP-N-acetylglucosamine 2-epimerase                          | 1.00E-85 |
| 2558670645 | DRAFT_01313 | pfam02350      | Epimerase_2                                                  | 3.00E-99 |
| 2558670645 | DRAFT_01313 | EC:5.1.3.14    | UDP-N-acetylglucosamine 2-epimerase (non-hydrolyzing).       |          |

|            |             |                |                                                                        |           |
|------------|-------------|----------------|------------------------------------------------------------------------|-----------|
| 2558670645 | DRAFT_01313 | TIGR00236      | UDP-N-acetylglucosamine 2-epimerase                                    | 1.30E-105 |
| 2558670645 | DRAFT_01313 | KO:K01791      | UDP-N-acetylglucosamine 2-epimerase [EC:5.1.3.14]                      | 0.00E+00  |
| 2558670645 | DRAFT_01313 | Locus_type     | CDS                                                                    |           |
| 2558670645 | DRAFT_01313 | Product_name   | UDP-N-acetylglucosamine 2-epimerase                                    |           |
| 2558670645 | DRAFT_01313 | Scaffold       | DRAFT_contig_70_219_len_19329_read_count_354966.28                     |           |
| 2558670645 | DRAFT_01313 | Coordinates    | 9126..10229(+)                                                         |           |
| 2558670645 | DRAFT_01313 | DNA_length     | 1104bp                                                                 |           |
| 2558670645 | DRAFT_01313 | Protein_length | 367aa                                                                  |           |
| 2558670645 | DRAFT_01313 | GC             |                                                                        | 0.51      |
|            |             |                |                                                                        |           |
| 2558670646 | DRAFT_01314 | COG_category   | [R] General function prediction only                                   |           |
| 2558670646 | DRAFT_01314 | COG2244        | Membrane protein involved in the export of O-antigen and teichoic aci  | 8.00E-12  |
| 2558670646 | DRAFT_01314 | pfam01943      | Polysacc_synt                                                          | 2.40E-20  |
| 2558670646 | DRAFT_01314 | Locus_type     | CDS                                                                    |           |
| 2558670646 | DRAFT_01314 | Product_name   | Membrane protein involved in the export of O-antigen and teichoic a    |           |
| 2558670646 | DRAFT_01314 | Scaffold       | DRAFT_contig_70_219_len_19329_read_count_354966.28                     |           |
| 2558670646 | DRAFT_01314 | Coordinates    | 10390..11967(+)                                                        |           |
| 2558670646 | DRAFT_01314 | DNA_length     | 1578bp                                                                 |           |
| 2558670646 | DRAFT_01314 | Protein_length | 525aa                                                                  |           |
| 2558670646 | DRAFT_01314 | GC             |                                                                        | 0.57      |
| 2558670646 | DRAFT_01314 | Transmembrane  | Yes                                                                    |           |
|            |             |                |                                                                        |           |
| 2558670647 | DRAFT_01315 | pfam05159      | Capsule_synt                                                           | 1.20E-08  |
| 2558670647 | DRAFT_01315 | Locus_type     | CDS                                                                    |           |
| 2558670647 | DRAFT_01315 | Product_name   | Putative glycosyl/glycerophosphate transferases involved in teichoic a |           |
| 2558670647 | DRAFT_01315 | Scaffold       | DRAFT_contig_70_219_len_19329_read_count_354966.28                     |           |
| 2558670647 | DRAFT_01315 | Coordinates    | 12017..13696(+)                                                        |           |
| 2558670647 | DRAFT_01315 | DNA_length     | 1680bp                                                                 |           |
| 2558670647 | DRAFT_01315 | Protein_length | 559aa                                                                  |           |
| 2558670647 | DRAFT_01315 | GC             |                                                                        | 0.52      |
|            |             |                |                                                                        |           |
| 2558670648 | DRAFT_01316 | Locus_type     | CDS                                                                    |           |
| 2558670648 | DRAFT_01316 | Product_name   | hypothetical protein                                                   |           |
| 2558670648 | DRAFT_01316 | Scaffold       | DRAFT_contig_70_219_len_19329_read_count_354966.28                     |           |

|            |             |                |                                                                     |          |
|------------|-------------|----------------|---------------------------------------------------------------------|----------|
| 2558670648 | DRAFT_01316 | Coordinates    | 13708..15921(+)                                                     |          |
| 2558670648 | DRAFT_01316 | DNA_length     | 2214bp                                                              |          |
| 2558670648 | DRAFT_01316 | Protein_length | 737aa                                                               |          |
| 2558670648 | DRAFT_01316 | GC             |                                                                     | 0.52     |
| 2558670648 | DRAFT_01316 | Transmembrane  | Yes                                                                 |          |
| 2558670649 | DRAFT_01317 | COG_category   | [M] Cell wall/membrane/envelope biogenesis                          |          |
| 2558670649 | DRAFT_01317 | COG1083        | CMP-N-acetylneuraminic acid synthetase                              | 1.00E-33 |
| 2558670649 | DRAFT_01317 | pfam02348      | CTP_transf_3                                                        | 2.20E-21 |
| 2558670649 | DRAFT_01317 | Locus_type     | CDS                                                                 |          |
| 2558670649 | DRAFT_01317 | Product_name   | CMP-N-acetylneuraminic acid synthetase                              |          |
| 2558670649 | DRAFT_01317 | Scaffold       | DRAFT_contig_70_219_len_19329_read_count_354966.28                  |          |
| 2558670649 | DRAFT_01317 | Coordinates    | 16106..17785(+)                                                     |          |
| 2558670649 | DRAFT_01317 | DNA_length     | 1680bp                                                              |          |
| 2558670649 | DRAFT_01317 | Protein_length | 559aa                                                               |          |
| 2558670649 | DRAFT_01317 | GC             |                                                                     | 0.53     |
| 2558670649 | DRAFT_01317 | Fused_gene     | Yes                                                                 |          |
| 2558670650 | DRAFT_01318 | Metacyc        | PWY-6139: CMP-<i>N</i>-acetylneuraminate biosynthesis II (bacteria) |          |
| 2558670650 | DRAFT_01318 | COG_category   | [M] Cell wall/membrane/envelope biogenesis                          |          |
| 2558670650 | DRAFT_01318 | COG2089        | Sialic acid synthase                                                | 3.00E-69 |
| 2558670650 | DRAFT_01318 | pfam03102      | NeuB                                                                | 1.30E-67 |
| 2558670650 | DRAFT_01318 | pfam08666      | SAF                                                                 | 8.10E-06 |
| 2558670650 | DRAFT_01318 | EC:2.5.1.56    | N-acetylneuraminate synthase.                                       |          |
| 2558670650 | DRAFT_01318 | KO:K01654      | N-acetylneuraminate synthase [EC:2.5.1.56]                          | 0.00E+00 |
| 2558670650 | DRAFT_01318 | Locus_type     | CDS                                                                 |          |
| 2558670650 | DRAFT_01318 | Product_name   | N-acetylneuraminate synthase (EC 2.5.1.56)                          |          |
| 2558670650 | DRAFT_01318 | Scaffold       | DRAFT_contig_70_219_len_19329_read_count_354966.28                  |          |
| 2558670650 | DRAFT_01318 | Coordinates    | 17778..18863(+)                                                     |          |
| 2558670650 | DRAFT_01318 | DNA_length     | 1086bp                                                              |          |
| 2558670650 | DRAFT_01318 | Protein_length | 361aa                                                               |          |
| 2558670650 | DRAFT_01318 | GC             |                                                                     | 0.52     |
| 2558670651 | DRAFT_01319 | pfam01436      | NHL                                                                 | 4.70E-06 |

|            |             |                |                                                    |          |
|------------|-------------|----------------|----------------------------------------------------|----------|
| 2558670651 | DRAFT_01319 | Locus_type     | CDS                                                |          |
| 2558670651 | DRAFT_01319 | Product_name   | NHL repeat                                         |          |
| 2558670651 | DRAFT_01319 | Scaffold       | DRAFT_contig_70_219_len_19329_read_count_354966.28 |          |
| 2558670651 | DRAFT_01319 | Coordinates    | 19008..19328(+)                                    |          |
| 2558670651 | DRAFT_01319 | DNA_length     | 321bp                                              |          |
| 2558670651 | DRAFT_01319 | Protein_length | 107aa                                              |          |
| 2558670651 | DRAFT_01319 | GC             |                                                    | 0.52     |
| 2558670651 | DRAFT_01319 | Transmembrane  | Yes                                                |          |
|            |             |                |                                                    |          |
| 2558670652 | DRAFT_01320 | Locus_type     | CDS                                                |          |
| 2558670652 | DRAFT_01320 | Product_name   | hypothetical protein                               |          |
| 2558670652 | DRAFT_01320 | Scaffold       | DRAFT_contig_70_220_len_19073_read_count_329530.29 |          |
| 2558670652 | DRAFT_01320 | Coordinates    | 1..315(+)                                          |          |
| 2558670652 | DRAFT_01320 | DNA_length     | 315bp                                              |          |
| 2558670652 | DRAFT_01320 | Protein_length | 104aa                                              |          |
| 2558670652 | DRAFT_01320 | GC             |                                                    | 0.53     |
| 2558670652 | DRAFT_01320 | Transmembrane  | Yes                                                |          |
|            |             |                |                                                    |          |
| 2558670653 | DRAFT_01321 | COG_category   | [S] Function unknown                               |          |
| 2558670653 | DRAFT_01321 | COG1872        | Uncharacterized conserved protein                  | 8.00E-11 |
| 2558670653 | DRAFT_01321 | pfam02594      | DUF167                                             | 4.60E-22 |
| 2558670653 | DRAFT_01321 | TIGR00251      | TIGR00251 family protein                           | 5.10E-16 |
| 2558670653 | DRAFT_01321 | KO:K09131      | hypothetical protein                               | 2.20E-11 |
| 2558670653 | DRAFT_01321 | Locus_type     | CDS                                                |          |
| 2558670653 | DRAFT_01321 | Product_name   | Uncharacterized conserved protein                  |          |
| 2558670653 | DRAFT_01321 | Scaffold       | DRAFT_contig_70_220_len_19073_read_count_329530.29 |          |
| 2558670653 | DRAFT_01321 | Coordinates    | 721..942(+)                                        |          |
| 2558670653 | DRAFT_01321 | DNA_length     | 222bp                                              |          |
| 2558670653 | DRAFT_01321 | Protein_length | 73aa                                               |          |
| 2558670653 | DRAFT_01321 | GC             |                                                    | 0.51     |
|            |             |                |                                                    |          |
| 2558670654 | DRAFT_01322 | Locus_type     | CDS                                                |          |
| 2558670654 | DRAFT_01322 | Product_name   | hypothetical protein                               |          |
| 2558670654 | DRAFT_01322 | Scaffold       | DRAFT_contig_70_220_len_19073_read_count_329530.29 |          |

|            |             |                |                                                    |          |
|------------|-------------|----------------|----------------------------------------------------|----------|
| 2558670654 | DRAFT_01322 | Coordinates    | 1257..1691(-)                                      |          |
| 2558670654 | DRAFT_01322 | DNA_length     | 435bp                                              |          |
| 2558670654 | DRAFT_01322 | Protein_length | 144aa                                              |          |
| 2558670654 | DRAFT_01322 | GC             |                                                    | 0.57     |
| 2558670654 | DRAFT_01322 | Transmembrane  | Yes                                                |          |
| 2558670655 | DRAFT_01323 | Locus_type     | CDS                                                |          |
| 2558670655 | DRAFT_01323 | Product_name   | hypothetical protein                               |          |
| 2558670655 | DRAFT_01323 | Scaffold       | DRAFT_contig_70_220_len_19073_read_count_329530.29 |          |
| 2558670655 | DRAFT_01323 | Coordinates    | 1688..1894(-)                                      |          |
| 2558670655 | DRAFT_01323 | DNA_length     | 207bp                                              |          |
| 2558670655 | DRAFT_01323 | Protein_length | 68aa                                               |          |
| 2558670655 | DRAFT_01323 | GC             |                                                    | 0.54     |
| 2558670656 | DRAFT_01324 | Locus_type     | CDS                                                |          |
| 2558670656 | DRAFT_01324 | Product_name   | hypothetical protein                               |          |
| 2558670656 | DRAFT_01324 | Scaffold       | DRAFT_contig_70_220_len_19073_read_count_329530.29 |          |
| 2558670656 | DRAFT_01324 | Coordinates    | 1934..3055(+)                                      |          |
| 2558670656 | DRAFT_01324 | DNA_length     | 1122bp                                             |          |
| 2558670656 | DRAFT_01324 | Protein_length | 373aa                                              |          |
| 2558670656 | DRAFT_01324 | GC             |                                                    | 0.57     |
| 2558670656 | DRAFT_01324 | Transmembrane  | Yes                                                |          |
| 2558670657 | DRAFT_01325 | COG_category   | [R] General function prediction only               |          |
| 2558670657 | DRAFT_01325 | COG1011        | Predicted hydrolase (HAD superfamily)              | 4.00E-16 |
| 2558670657 | DRAFT_01325 | pfam13419      | HAD_2                                              | 5.80E-13 |
| 2558670657 | DRAFT_01325 | Locus_type     | CDS                                                |          |
| 2558670657 | DRAFT_01325 | Product_name   | Predicted hydrolase (HAD superfamily)              |          |
| 2558670657 | DRAFT_01325 | Scaffold       | DRAFT_contig_70_220_len_19073_read_count_329530.29 |          |
| 2558670657 | DRAFT_01325 | Coordinates    | 3338..4093(-)                                      |          |
| 2558670657 | DRAFT_01325 | DNA_length     | 756bp                                              |          |
| 2558670657 | DRAFT_01325 | Protein_length | 251aa                                              |          |
| 2558670657 | DRAFT_01325 | GC             |                                                    | 0.59     |

|            |             |                |                                                                      |          |
|------------|-------------|----------------|----------------------------------------------------------------------|----------|
| 2558670658 | DRAFT_01326 | pfam00583      | Acetyltransf_1                                                       | 7.30E-17 |
| 2558670658 | DRAFT_01326 | Locus_type     | CDS                                                                  |          |
| 2558670658 | DRAFT_01326 | Product_name   | Acetyltransferases                                                   |          |
| 2558670658 | DRAFT_01326 | Scaffold       | DRAFT_contig_70_220_len_19073_read_count_329530.29                   |          |
| 2558670658 | DRAFT_01326 | Coordinates    | 4181..4669(-)                                                        |          |
| 2558670658 | DRAFT_01326 | DNA_length     | 489bp                                                                |          |
| 2558670658 | DRAFT_01326 | Protein_length | 162aa                                                                |          |
| 2558670658 | DRAFT_01326 | GC             |                                                                      | 0.53     |
| 2558670659 | DRAFT_01327 | COG_category   | [K] Transcription                                                    |          |
| 2558670659 | DRAFT_01327 | COG1321        | Mn-dependent transcriptional regulator                               | 7.00E-25 |
| 2558670659 | DRAFT_01327 | pfam01325      | Fe_dep_repress                                                       | 1.40E-19 |
| 2558670659 | DRAFT_01327 | pfam02742      | Fe_dep_repr_C                                                        | 4.50E-14 |
| 2558670659 | DRAFT_01327 | ITERM:02272    | iron (metal) dependent repressor, DtxR family                        |          |
| 2558670659 | DRAFT_01327 | Locus_type     | CDS                                                                  |          |
| 2558670659 | DRAFT_01327 | Product_name   | iron (metal) dependent repressor, DtxR family                        |          |
| 2558670659 | DRAFT_01327 | Scaffold       | DRAFT_contig_70_220_len_19073_read_count_329530.29                   |          |
| 2558670659 | DRAFT_01327 | Coordinates    | 5230..5700(-)                                                        |          |
| 2558670659 | DRAFT_01327 | DNA_length     | 471bp                                                                |          |
| 2558670659 | DRAFT_01327 | Protein_length | 156aa                                                                |          |
| 2558670659 | DRAFT_01327 | GC             |                                                                      | 0.53     |
| 2558670660 | DRAFT_01328 | pfam01566      | Nramp                                                                | 4.90E-19 |
| 2558670660 | DRAFT_01328 | TIGR01197      | NRAMP (natural resistance-associated macrophage protein) metal ion t | 4.50E-20 |
| 2558670660 | DRAFT_01328 | Locus_type     | CDS                                                                  |          |
| 2558670660 | DRAFT_01328 | Product_name   | Mn2+ and Fe2+ transporters of the NRAMP family                       |          |
| 2558670660 | DRAFT_01328 | Scaffold       | DRAFT_contig_70_220_len_19073_read_count_329530.29                   |          |
| 2558670660 | DRAFT_01328 | Coordinates    | 6042..6383(+)                                                        |          |
| 2558670660 | DRAFT_01328 | DNA_length     | 342bp                                                                |          |
| 2558670660 | DRAFT_01328 | Protein_length | 113aa                                                                |          |
| 2558670660 | DRAFT_01328 | GC             |                                                                      | 0.6      |
| 2558670661 | DRAFT_01329 | pfam00383      | dCMP_cyt_deam_1                                                      | 5.70E-15 |
| 2558670661 | DRAFT_01329 | Locus_type     | CDS                                                                  |          |

|            |             |                |                                                                  |          |
|------------|-------------|----------------|------------------------------------------------------------------|----------|
| 2558670661 | DRAFT_01329 | Product_name   | Deoxycytidylate deaminase                                        |          |
| 2558670661 | DRAFT_01329 | Scaffold       | DRAFT_contig_70_220_len_19073_read_count_329530.29               |          |
| 2558670661 | DRAFT_01329 | Coordinates    | 6265..6516(-)                                                    |          |
| 2558670661 | DRAFT_01329 | DNA_length     | 252bp                                                            |          |
| 2558670661 | DRAFT_01329 | Protein_length | 83aa                                                             |          |
| 2558670661 | DRAFT_01329 | GC             |                                                                  | 0.5      |
|            |             |                |                                                                  |          |
| 2558670662 | DRAFT_01330 | COG_category   | [J] Translation, ribosomal structure and biogenesis              |          |
| 2558670662 | DRAFT_01330 | COG1670        | Acetyltransferases, including N-acetylases of ribosomal proteins | 2.00E-11 |
| 2558670662 | DRAFT_01330 | pfam00583      | Acetyltransf_1                                                   | 1.50E-15 |
| 2558670662 | DRAFT_01330 | Locus_type     | CDS                                                              |          |
| 2558670662 | DRAFT_01330 | Product_name   | Acetyltransferases, including N-acetylases of ribosomal proteins |          |
| 2558670662 | DRAFT_01330 | Scaffold       | DRAFT_contig_70_220_len_19073_read_count_329530.29               |          |
| 2558670662 | DRAFT_01330 | Coordinates    | 6937..7545(+)                                                    |          |
| 2558670662 | DRAFT_01330 | DNA_length     | 609bp                                                            |          |
| 2558670662 | DRAFT_01330 | Protein_length | 202aa                                                            |          |
| 2558670662 | DRAFT_01330 | GC             |                                                                  | 0.57     |
|            |             |                |                                                                  |          |
| 2558670663 | DRAFT_01331 | Locus_type     | CDS                                                              |          |
| 2558670663 | DRAFT_01331 | Product_name   | hypothetical protein                                             |          |
| 2558670663 | DRAFT_01331 | Scaffold       | DRAFT_contig_70_220_len_19073_read_count_329530.29               |          |
| 2558670663 | DRAFT_01331 | Coordinates    | 7655..8347(-)                                                    |          |
| 2558670663 | DRAFT_01331 | DNA_length     | 693bp                                                            |          |
| 2558670663 | DRAFT_01331 | Protein_length | 230aa                                                            |          |
| 2558670663 | DRAFT_01331 | GC             |                                                                  | 0.52     |
|            |             |                |                                                                  |          |
| 2558670664 | DRAFT_01332 | COG_category   | [E] Amino acid transport and metabolism                          |          |
| 2558670664 | DRAFT_01332 | COG1506        | Dipeptidyl aminopeptidases/acylaminoacyl-peptidases              | 5.00E-89 |
| 2558670664 | DRAFT_01332 | pfam00326      | Peptidase_S9                                                     | 8.30E-56 |
| 2558670664 | DRAFT_01332 | pfam07676      | PD40                                                             | 3.60E-09 |
| 2558670664 | DRAFT_01332 | Locus_type     | CDS                                                              |          |
| 2558670664 | DRAFT_01332 | Product_name   | Dipeptidyl aminopeptidases/acylaminoacyl-peptidases              |          |
| 2558670664 | DRAFT_01332 | Scaffold       | DRAFT_contig_70_220_len_19073_read_count_329530.29               |          |
| 2558670664 | DRAFT_01332 | Coordinates    | 8589..10631(-)                                                   |          |



|            |             |                |                                                                  |          |
|------------|-------------|----------------|------------------------------------------------------------------|----------|
| 2558670664 | DRAFT_01332 | DNA_length     | 2043bp                                                           |          |
| 2558670664 | DRAFT_01332 | Protein_length | 680aa                                                            |          |
| 2558670664 | DRAFT_01332 | GC             |                                                                  | 0.62     |
| 2558670665 | DRAFT_01333 | IMG_pathway    | 217: N-3-alkylpurine repair via base excision                    |          |
| 2558670665 | DRAFT_01333 | COG_category   | [L] Replication, recombination and repair                        |          |
| 2558670665 | DRAFT_01333 | COG2231        | Uncharacterized protein related to Endonuclease III              | 4.00E-34 |
| 2558670665 | DRAFT_01333 | pfam00633      | HHH                                                              | 1.80E-05 |
| 2558670665 | DRAFT_01333 | pfam00730      | HhH-GPD                                                          | 2.40E-07 |
| 2558670665 | DRAFT_01333 | KO:K07457      | endonuclease III related protein                                 | 0.00E+00 |
| 2558670665 | DRAFT_01333 | ITERM:00576    | DNA-3-methyladenine glycosylase III (EC 3.2.2.-)                 |          |
| 2558670665 | DRAFT_01333 | Locus_type     | CDS                                                              |          |
| 2558670665 | DRAFT_01333 | Product_name   | DNA-3-methyladenine glycosylase III (EC 3.2.2.-)                 |          |
| 2558670665 | DRAFT_01333 | Scaffold       | DRAFT_contig_70_220_len_19073_read_count_329530.29               |          |
| 2558670665 | DRAFT_01333 | Coordinates    | 10736..11437(-)                                                  |          |
| 2558670665 | DRAFT_01333 | DNA_length     | 702bp                                                            |          |
| 2558670665 | DRAFT_01333 | Protein_length | 233aa                                                            |          |
| 2558670665 | DRAFT_01333 | GC             |                                                                  | 0.54     |
| 2558670666 | DRAFT_01334 | COG_category   | [O] Posttranslational modification, protein turnover, chaperones |          |
| 2558670666 | DRAFT_01334 | COG4870        | Cysteine protease                                                | 2.00E-19 |
| 2558670666 | DRAFT_01334 | pfam00112      | Peptidase_C1                                                     | 4.60E-11 |
| 2558670666 | DRAFT_01334 | Locus_type     | CDS                                                              |          |
| 2558670666 | DRAFT_01334 | Product_name   | Cysteine protease                                                |          |
| 2558670666 | DRAFT_01334 | Scaffold       | DRAFT_contig_70_220_len_19073_read_count_329530.29               |          |
| 2558670666 | DRAFT_01334 | Coordinates    | 11675..12367(+)                                                  |          |
| 2558670666 | DRAFT_01334 | DNA_length     | 693bp                                                            |          |
| 2558670666 | DRAFT_01334 | Protein_length | 230aa                                                            |          |
| 2558670666 | DRAFT_01334 | GC             |                                                                  | 0.58     |
| 2558670667 | DRAFT_01335 | COG_category   | [K] Transcription                                                |          |
| 2558670667 | DRAFT_01335 | COG1846        | Transcriptional regulators                                       | 3.00E-11 |
| 2558670667 | DRAFT_01335 | pfam01047      | MarR                                                             | 2.40E-16 |
| 2558670667 | DRAFT_01335 | Locus_type     | CDS                                                              |          |

|            |             |                |                                                                        |          |
|------------|-------------|----------------|------------------------------------------------------------------------|----------|
| 2558670667 | DRAFT_01335 | Product_name   | Transcriptional regulators                                             |          |
| 2558670667 | DRAFT_01335 | Scaffold       | DRAFT_contig_70_220_len_19073_read_count_329530.29                     |          |
| 2558670667 | DRAFT_01335 | Coordinates    | 12464..12910(+)                                                        |          |
| 2558670667 | DRAFT_01335 | DNA_length     | 447bp                                                                  |          |
| 2558670667 | DRAFT_01335 | Protein_length | 148aa                                                                  |          |
| 2558670667 | DRAFT_01335 | GC             |                                                                        | 0.57     |
| 2558670668 | DRAFT_01336 | pfam07690      | MFS_1                                                                  | 3.80E-44 |
| 2558670668 | DRAFT_01336 | TIGR00711      | drug resistance transporter, EmrB/QacA subfamily                       | 7.70E-63 |
| 2558670668 | DRAFT_01336 | Locus_type     | CDS                                                                    |          |
| 2558670668 | DRAFT_01336 | Product_name   | Arabinose efflux permease                                              |          |
| 2558670668 | DRAFT_01336 | Scaffold       | DRAFT_contig_70_220_len_19073_read_count_329530.29                     |          |
| 2558670668 | DRAFT_01336 | Coordinates    | 12920..14386(+)                                                        |          |
| 2558670668 | DRAFT_01336 | DNA_length     | 1467bp                                                                 |          |
| 2558670668 | DRAFT_01336 | Protein_length | 488aa                                                                  |          |
| 2558670668 | DRAFT_01336 | GC             |                                                                        | 0.6      |
| 2558670668 | DRAFT_01336 | Transmembrane  | Yes                                                                    |          |
| 2558670669 | DRAFT_01337 | pfam00924      | MS_channel                                                             | 2.20E-22 |
| 2558670669 | DRAFT_01337 | Locus_type     | CDS                                                                    |          |
| 2558670669 | DRAFT_01337 | Product_name   | Small-conductance mechanosensitive channel                             |          |
| 2558670669 | DRAFT_01337 | Scaffold       | DRAFT_contig_70_220_len_19073_read_count_329530.29                     |          |
| 2558670669 | DRAFT_01337 | Coordinates    | 14541..15086(-)                                                        |          |
| 2558670669 | DRAFT_01337 | DNA_length     | 546bp                                                                  |          |
| 2558670669 | DRAFT_01337 | Protein_length | 181aa                                                                  |          |
| 2558670669 | DRAFT_01337 | GC             |                                                                        | 0.64     |
| 2558670669 | DRAFT_01337 | Transmembrane  | Yes                                                                    |          |
| 2558670670 | DRAFT_01338 | pfam00230      | MIP                                                                    | 4.10E-14 |
| 2558670670 | DRAFT_01338 | Locus_type     | CDS                                                                    |          |
| 2558670670 | DRAFT_01338 | Product_name   | Glycerol uptake facilitator and related permeases (Major Intrinsic Pro |          |
| 2558670670 | DRAFT_01338 | Scaffold       | DRAFT_contig_70_220_len_19073_read_count_329530.29                     |          |
| 2558670670 | DRAFT_01338 | Coordinates    | 15287..15784(+)                                                        |          |
| 2558670670 | DRAFT_01338 | DNA_length     | 498bp                                                                  |          |

|            |             |                |                                                                            |          |
|------------|-------------|----------------|----------------------------------------------------------------------------|----------|
| 2558670670 | DRAFT_01338 | Protein_length | 165aa                                                                      |          |
| 2558670670 | DRAFT_01338 | GC             |                                                                            | 0.55     |
| 2558670670 | DRAFT_01338 | Transmembrane  | Yes                                                                        |          |
| 2558670671 | DRAFT_01339 | TIGR02276      | 40-residue YVTN family beta-propeller repeat                               | 1.70E-11 |
| 2558670671 | DRAFT_01339 | Locus_type     | CDS                                                                        |          |
| 2558670671 | DRAFT_01339 | Product_name   | 40-residue YVTN family beta-propeller repeat                               |          |
| 2558670671 | DRAFT_01339 | Scaffold       | DRAFT_contig_70_220_len_19073_read_count_329530.29                         |          |
| 2558670671 | DRAFT_01339 | Coordinates    | 15757..19071(+)                                                            |          |
| 2558670671 | DRAFT_01339 | DNA_length     | 3315bp                                                                     |          |
| 2558670671 | DRAFT_01339 | Protein_length | 1105aa                                                                     |          |
| 2558670671 | DRAFT_01339 | GC             |                                                                            | 0.58     |
| 2558670671 | DRAFT_01339 | Transmembrane  | Yes                                                                        |          |
| 2558670672 | DRAFT_01340 | Metacyc        | 3-HYDROXYPHENYLACETATE-DEGRADATION-PWY: 4-hydroxyphenylacetate degradation |          |
| 2558670672 | DRAFT_01340 | Metacyc        | PWY-7153: grixazone biosynthesis                                           |          |
| 2558670672 | DRAFT_01340 | Metacyc        | PWY-7046: 4-coumarate degradation (anaerobic)                              |          |
| 2558670672 | DRAFT_01340 | Metacyc        | NPGLUCAT-PWY: Entner-Doudoroff pathway II (non-phosphorylative)            |          |
| 2558670672 | DRAFT_01340 | Metacyc        | PWY-6713: L-rhamnose degradation II                                        |          |
| 2558670672 | DRAFT_01340 | Metacyc        | CALVIN-PWY: Calvin-Benson-Bassham cycle                                    |          |
| 2558670672 | DRAFT_01340 | Metacyc        | PWY-7085: triethylamine degradation                                        |          |
| 2558670672 | DRAFT_01340 | Metacyc        | PWY0-1517: sedoheptulose bisphosphate bypass                               |          |
| 2558670672 | DRAFT_01340 | COG_category   | [G] Carbohydrate transport and metabolism                                  |          |
| 2558670672 | DRAFT_01340 | COG1830        | DhnA-type fructose-1,6-bisphosphate aldolase and related enzymes           | 2.00E-63 |
| 2558670672 | DRAFT_01340 | pfam01791      | DeoC                                                                       | 3.10E-22 |
| 2558670672 | DRAFT_01340 | EC:4.1.2.-     | Lyases. Carbon-carbon lyases. Aldehyde-lyases.                             |          |
| 2558670672 | DRAFT_01340 | KO:K08321      | putative autoinducer-2 (AI-2) aldolase [EC:4.1.2.-]                        | 0.00E+00 |
| 2558670672 | DRAFT_01340 | Locus_type     | CDS                                                                        |          |
| 2558670672 | DRAFT_01340 | Product_name   | DhnA-type fructose-1,6-bisphosphate aldolase and related enzymes           |          |
| 2558670672 | DRAFT_01340 | Scaffold       | DRAFT_contig_70_226_len_18807_read_count_299628.30                         |          |
| 2558670672 | DRAFT_01340 | Coordinates    | 226..1002(-)                                                               |          |
| 2558670672 | DRAFT_01340 | DNA_length     | 777bp                                                                      |          |
| 2558670672 | DRAFT_01340 | Protein_length | 258aa                                                                      |          |
| 2558670672 | DRAFT_01340 | GC             |                                                                            | 0.57     |

|            |             |                |                                                                 |           |
|------------|-------------|----------------|-----------------------------------------------------------------|-----------|
| 2558670673 | DRAFT_01341 | Metacyc        | PWY-4101: sorbitol degradation I                                |           |
| 2558670673 | DRAFT_01341 | Metacyc        | PWY-6693: galactose degradation IV                              |           |
| 2558670673 | DRAFT_01341 | COG_category   | [R] General function prediction only                            |           |
| 2558670673 | DRAFT_01341 | COG_category   | [E] Amino acid transport and metabolism                         |           |
| 2558670673 | DRAFT_01341 | COG1063        | Threonine dehydrogenase and related Zn-dependent dehydrogenases | 5.00E-55  |
| 2558670673 | DRAFT_01341 | pfam08240      | ADH_N                                                           | 8.20E-26  |
| 2558670673 | DRAFT_01341 | pfam00107      | ADH_zinc_N                                                      | 5.90E-19  |
| 2558670673 | DRAFT_01341 | EC:1.1.1.14    | L-Iditol 2-dehydrogenase.                                       |           |
| 2558670673 | DRAFT_01341 | KO:K00008      | L-Iditol 2-dehydrogenase [EC:1.1.1.14]                          | 0.00E+00  |
| 2558670673 | DRAFT_01341 | Locus_type     | CDS                                                             |           |
| 2558670673 | DRAFT_01341 | Product_name   | Threonine dehydrogenase and related Zn-dependent dehydrogenases |           |
| 2558670673 | DRAFT_01341 | Scaffold       | DRAFT_contig_70_226_len_18807_read_count_299628.30              |           |
| 2558670673 | DRAFT_01341 | Coordinates    | 1073..2095(-)                                                   |           |
| 2558670673 | DRAFT_01341 | DNA_length     | 1023bp                                                          |           |
| 2558670673 | DRAFT_01341 | Protein_length | 340aa                                                           |           |
| 2558670673 | DRAFT_01341 | GC             |                                                                 | 0.57      |
| 2558670674 | DRAFT_01342 | Locus_type     | CDS                                                             |           |
| 2558670674 | DRAFT_01342 | Product_name   | hypothetical protein                                            |           |
| 2558670674 | DRAFT_01342 | Scaffold       | DRAFT_contig_70_226_len_18807_read_count_299628.30              |           |
| 2558670674 | DRAFT_01342 | Coordinates    | 2512..2760(-)                                                   |           |
| 2558670674 | DRAFT_01342 | DNA_length     | 249bp                                                           |           |
| 2558670674 | DRAFT_01342 | Protein_length | 82aa                                                            |           |
| 2558670674 | DRAFT_01342 | GC             |                                                                 | 0.51      |
| 2558670674 | DRAFT_01342 | Transmembrane  | Yes                                                             |           |
| 2558670675 | DRAFT_01343 | COG_category   | [R] General function prediction only                            |           |
| 2558670675 | DRAFT_01343 | COG1163        | Predicted GTPase                                                | 5.00E-123 |
| 2558670675 | DRAFT_01343 | pfam01926      | MMR_HSR1                                                        | 2.50E-21  |
| 2558670675 | DRAFT_01343 | pfam02824      | TGS                                                             | 1.90E-15  |
| 2558670675 | DRAFT_01343 | TIGR00231      | small GTP-binding protein domain                                | 3.80E-23  |
| 2558670675 | DRAFT_01343 | Locus_type     | CDS                                                             |           |
| 2558670675 | DRAFT_01343 | Product_name   | small GTP-binding protein domain                                |           |

|            |             |                |                                                       |          |
|------------|-------------|----------------|-------------------------------------------------------|----------|
| 2558670675 | DRAFT_01343 | Scaffold       | DRAFT_contig_70_226_len_18807_read_count_299628.30    |          |
| 2558670675 | DRAFT_01343 | Coordinates    | 2881..3978(+)                                         |          |
| 2558670675 | DRAFT_01343 | DNA_length     | 1098bp                                                |          |
| 2558670675 | DRAFT_01343 | Protein_length | 365aa                                                 |          |
| 2558670675 | DRAFT_01343 | GC             |                                                       | 0.55     |
|            |             |                |                                                       |          |
| 2558670676 | DRAFT_01344 | KEGG_module    | M00003: Gluconeogenesis, oxaloacetate => fructose-6P  |          |
| 2558670676 | DRAFT_01344 | COG_category   | [C] Energy production and conversion                  |          |
| 2558670676 | DRAFT_01344 | COG1274        | Phosphoenolpyruvate carboxykinase (GTP)               | 0.00E+00 |
| 2558670676 | DRAFT_01344 | pfam00821      | PEPCK                                                 | 0.00E+00 |
| 2558670676 | DRAFT_01344 | EC:4.1.1.32    | Phosphoenolpyruvate carboxykinase (GTP).              |          |
| 2558670676 | DRAFT_01344 | KO:K01596      | phosphoenolpyruvate carboxykinase (GTP) [EC:4.1.1.32] | 0.00E+00 |
| 2558670676 | DRAFT_01344 | Locus_type     | CDS                                                   |          |
| 2558670676 | DRAFT_01344 | Product_name   | Phosphoenolpyruvate carboxykinase (GTP)               |          |
| 2558670676 | DRAFT_01344 | Scaffold       | DRAFT_contig_70_226_len_18807_read_count_299628.30    |          |
| 2558670676 | DRAFT_01344 | Coordinates    | 4012..5853(-)                                         |          |
| 2558670676 | DRAFT_01344 | DNA_length     | 1842bp                                                |          |
| 2558670676 | DRAFT_01344 | Protein_length | 613aa                                                 |          |
| 2558670676 | DRAFT_01344 | GC             |                                                       | 0.58     |
|            |             |                |                                                       |          |
| 2558670677 | DRAFT_01345 | Locus_type     | CDS                                                   |          |
| 2558670677 | DRAFT_01345 | Product_name   | hypothetical protein                                  |          |
| 2558670677 | DRAFT_01345 | Scaffold       | DRAFT_contig_70_226_len_18807_read_count_299628.30    |          |
| 2558670677 | DRAFT_01345 | Coordinates    | 6006..6704(+)                                         |          |
| 2558670677 | DRAFT_01345 | DNA_length     | 699bp                                                 |          |
| 2558670677 | DRAFT_01345 | Protein_length | 232aa                                                 |          |
| 2558670677 | DRAFT_01345 | GC             |                                                       | 0.52     |
| 2558670677 | DRAFT_01345 | Transmembrane  | Yes                                                   |          |
|            |             |                |                                                       |          |
| 2558670678 | DRAFT_01346 | COG_category   | [K] Transcription                                     |          |
| 2558670678 | DRAFT_01346 | COG3432        | Predicted transcriptional regulator                   | 6.00E-08 |
| 2558670678 | DRAFT_01346 | pfam14947      | HTH_45                                                | 4.10E-11 |
| 2558670678 | DRAFT_01346 | Locus_type     | CDS                                                   |          |
| 2558670678 | DRAFT_01346 | Product_name   | Predicted transcriptional regulator                   |          |

|            |             |                |                                                                                |
|------------|-------------|----------------|--------------------------------------------------------------------------------|
| 2558670678 | DRAFT_01346 | Scaffold       | DRAFT_contig_70_226_len_18807_read_count_299628.30                             |
| 2558670678 | DRAFT_01346 | Coordinates    | 6691..6978(+)                                                                  |
| 2558670678 | DRAFT_01346 | DNA_length     | 288bp                                                                          |
| 2558670678 | DRAFT_01346 | Protein_length | 95aa                                                                           |
| 2558670678 | DRAFT_01346 | GC             | 0.53                                                                           |
| 2558670679 | DRAFT_01347 | KEGG_module    | M00171: C4-dicarboxylic acid cycle, NAD+ -malic enzyme type                    |
| 2558670679 | DRAFT_01347 | KEGG_module    | M00168: CAM (Crassulacean acid metabolism), dark                               |
| 2558670679 | DRAFT_01347 | KEGG_module    | M00012: Glyoxylate cycle                                                       |
| 2558670679 | DRAFT_01347 | KEGG_module    | M00173: Reductive citric acid cycle (Arnon-Buchanan cycle)                     |
| 2558670679 | DRAFT_01347 | KEGG_module    | M00011: Citrate cycle, second carbon oxidation, 2-oxoglutarate => oxaloacetate |
| 2558670679 | DRAFT_01347 | KEGG_module    | M00374: Dicarboxylate-hydroxybutyrate cycle                                    |
| 2558670679 | DRAFT_01347 | KEGG_module    | M00009: Citrate cycle (TCA cycle, Krebs cycle)                                 |
| 2558670679 | DRAFT_01347 | KEGG_module    | M00346: Formaldehyde assimilation, serine pathway                              |
| 2558670679 | DRAFT_01347 | Metacyc        | PWY-7115: C4 photosynthetic carbon assimilation cycle, NAD-ME type             |
| 2558670679 | DRAFT_01347 | Metacyc        | GLYOXYLATE-BYPASS: glyoxylate cycle                                            |
| 2558670679 | DRAFT_01347 | Metacyc        | P42-PWY: incomplete reductive TCA cycle                                        |
| 2558670679 | DRAFT_01347 | Metacyc        | GLUCONEO-PWY: gluconeogenesis I                                                |
| 2558670679 | DRAFT_01347 | Metacyc        | FERMENTATION-PWY: mixed acid fermentation                                      |
| 2558670679 | DRAFT_01347 | Metacyc        | PWY-6969: TCA cycle V (2-oxoglutarate:ferredoxin oxidoreductase)               |
| 2558670679 | DRAFT_01347 | Metacyc        | PWY-1622: formaldehyde assimilation I (serine pathway)                         |
| 2558670679 | DRAFT_01347 | Metacyc        | P108-PWY: pyruvate fermentation to propionate I                                |
| 2558670679 | DRAFT_01347 | Metacyc        | PWY-5913: TCA cycle VI (obligate autotrophs)                                   |
| 2558670679 | DRAFT_01347 | Metacyc        | TCA: TCA cycle I (prokaryotic)                                                 |
| 2558670679 | DRAFT_01347 | Metacyc        | P23-PWY: reductive TCA cycle I                                                 |
| 2558670679 | DRAFT_01347 | Metacyc        | PWY-6728: methylaspartate cycle                                                |
| 2558670679 | DRAFT_01347 | Metacyc        | PWY-5690: TCA cycle II (eukaryotic)                                            |
| 2558670679 | DRAFT_01347 | Metacyc        | P105-PWY: TCA cycle IV (2-oxoglutarate decarboxylase)                          |
| 2558670679 | DRAFT_01347 | Metacyc        | ANARESP1-PWY: respiration (anaerobic)                                          |
| 2558670679 | DRAFT_01347 | Metacyc        | MALATE-ASPARTATE-SHUTTLE-PWY: aspartate degradation II                         |
| 2558670679 | DRAFT_01347 | Metacyc        | PWY-561: superpathway of glyoxylate cycle and fatty acid degradation           |
| 2558670679 | DRAFT_01347 | Metacyc        | PWY-5392: reductive TCA cycle II                                               |
| 2558670679 | DRAFT_01347 | COG_category   | [C] Energy production and conversion                                           |
| 2558670679 | DRAFT_01347 | COG0039        | Malate/lactate dehydrogenases                                                  |

5.00E-81

|            |             |                |                                                    |          |
|------------|-------------|----------------|----------------------------------------------------|----------|
| 2558670679 | DRAFT_01347 | pfam00056      | Ldh_1_N                                            | 6.90E-32 |
| 2558670679 | DRAFT_01347 | pfam02866      | Ldh_1_C                                            | 1.10E-28 |
| 2558670679 | DRAFT_01347 | EC:1.1.1.37    | Malate dehydrogenase.                              |          |
| 2558670679 | DRAFT_01347 | TIGR01763      | malate dehydrogenase, NAD-dependent                | 4.10E-91 |
| 2558670679 | DRAFT_01347 | KO:K00024      | malate dehydrogenase [EC:1.1.1.37]                 | 0.00E+00 |
| 2558670679 | DRAFT_01347 | Locus_type     | CDS                                                |          |
| 2558670679 | DRAFT_01347 | Product_name   | Malate/lactate dehydrogenases                      |          |
| 2558670679 | DRAFT_01347 | Scaffold       | DRAFT_contig_70_226_len_18807_read_count_299628.30 |          |
| 2558670679 | DRAFT_01347 | Coordinates    | 7056..7967(+)                                      |          |
| 2558670679 | DRAFT_01347 | DNA_length     | 912bp                                              |          |
| 2558670679 | DRAFT_01347 | Protein_length | 303aa                                              |          |
| 2558670679 | DRAFT_01347 | GC             |                                                    | 0.59     |
| 2558670680 | DRAFT_01348 | Locus_type     | CDS                                                |          |
| 2558670680 | DRAFT_01348 | Product_name   | hypothetical protein                               |          |
| 2558670680 | DRAFT_01348 | Scaffold       | DRAFT_contig_70_226_len_18807_read_count_299628.30 |          |
| 2558670680 | DRAFT_01348 | Coordinates    | 7877..8098(-)                                      |          |
| 2558670680 | DRAFT_01348 | DNA_length     | 222bp                                              |          |
| 2558670680 | DRAFT_01348 | Protein_length | 73aa                                               |          |
| 2558670680 | DRAFT_01348 | GC             |                                                    | 0.47     |
| 2558670680 | DRAFT_01348 | Transmembrane  | Yes                                                |          |
| 2558670681 | DRAFT_01349 | pfam01012      | ETF                                                | 5.20E-12 |
| 2558670681 | DRAFT_01349 | ITRM:01639     | electron transfer flavoprotein beta subunit        |          |
| 2558670681 | DRAFT_01349 | Locus_type     | CDS                                                |          |
| 2558670681 | DRAFT_01349 | Product_name   | electron transfer flavoprotein beta subunit        |          |
| 2558670681 | DRAFT_01349 | Scaffold       | DRAFT_contig_70_226_len_18807_read_count_299628.30 |          |
| 2558670681 | DRAFT_01349 | Coordinates    | 8222..9400(+)                                      |          |
| 2558670681 | DRAFT_01349 | DNA_length     | 1179bp                                             |          |
| 2558670681 | DRAFT_01349 | Protein_length | 392aa                                              |          |
| 2558670681 | DRAFT_01349 | GC             |                                                    | 0.59     |
| 2558670682 | DRAFT_01350 | COG_category   | [C] Energy production and conversion               |          |
| 2558670682 | DRAFT_01350 | COG2025        | Electron transfer flavoprotein, alpha subunit      | 6.00E-67 |

|            |             |                |                                                                                             |          |
|------------|-------------|----------------|---------------------------------------------------------------------------------------------|----------|
| 2558670682 | DRAFT_01350 | pfam01012      | ETF                                                                                         | 1.40E-31 |
| 2558670682 | DRAFT_01350 | pfam00766      | ETF_alpha                                                                                   | 7.40E-18 |
| 2558670682 | DRAFT_01350 | KO:K03522      | electron transfer flavoprotein alpha subunit                                                | 0.00E+00 |
| 2558670682 | DRAFT_01350 | Locus_type     | CDS                                                                                         |          |
| 2558670682 | DRAFT_01350 | Product_name   | Electron transfer flavoprotein, alpha subunit                                               |          |
| 2558670682 | DRAFT_01350 | Scaffold       | DRAFT_contig_70_226_len_18807_read_count_299628.30                                          |          |
| 2558670682 | DRAFT_01350 | Coordinates    | 9397..10482(+)                                                                              |          |
| 2558670682 | DRAFT_01350 | DNA_length     | 1086bp                                                                                      |          |
| 2558670682 | DRAFT_01350 | Protein_length | 361aa                                                                                       |          |
| 2558670682 | DRAFT_01350 | GC             |                                                                                             | 0.6      |
| 2558670683 | DRAFT_01351 | COG_category   | [C] Energy production and conversion                                                        |          |
| 2558670683 | DRAFT_01351 | COG0644        | Dehydrogenases (flavoproteins)                                                              | 2.00E-41 |
| 2558670683 | DRAFT_01351 | pfam01266      | DAO                                                                                         | 1.10E-17 |
| 2558670683 | DRAFT_01351 | EC:1.5.5.-     | Oxidoreductases. Acting on the CH-NH group of donors. With a quinone or similar compound as |          |
| 2558670683 | DRAFT_01351 | KO:K00313      | electron transfer flavoprotein-quinone oxidoreductase [EC:1.5.5.-]                          | 0.00E+00 |
| 2558670683 | DRAFT_01351 | Locus_type     | CDS                                                                                         |          |
| 2558670683 | DRAFT_01351 | Product_name   | Dehydrogenases (flavoproteins)                                                              |          |
| 2558670683 | DRAFT_01351 | Scaffold       | DRAFT_contig_70_226_len_18807_read_count_299628.30                                          |          |
| 2558670683 | DRAFT_01351 | Coordinates    | 10472..12166(+)                                                                             |          |
| 2558670683 | DRAFT_01351 | DNA_length     | 1695bp                                                                                      |          |
| 2558670683 | DRAFT_01351 | Protein_length | 564aa                                                                                       |          |
| 2558670683 | DRAFT_01351 | GC             |                                                                                             | 0.59     |
| 2558670684 | DRAFT_01352 | KEGG_module    | M00141: C1-unit interconversion, eukaryotes                                                 |          |
| 2558670684 | DRAFT_01352 | KEGG_module    | M00532: Photorespiration                                                                    |          |
| 2558670684 | DRAFT_01352 | KEGG_module    | M00346: Formaldehyde assimilation, serine pathway                                           |          |
| 2558670684 | DRAFT_01352 | KEGG_module    | M00140: C1-unit interconversion, prokaryotes                                                |          |
| 2558670684 | DRAFT_01352 | Metacyc        | 1CMET2-PWY: formylTHF biosynthesis I                                                        |          |
| 2558670684 | DRAFT_01352 | Metacyc        | PWY-1622: formaldehyde assimilation I (serine pathway)                                      |          |
| 2558670684 | DRAFT_01352 | Metacyc        | PWY-2161: folate polyglutamylatation                                                        |          |
| 2558670684 | DRAFT_01352 | Metacyc        | PWY-3661: glycine betaine degradation                                                       |          |
| 2558670684 | DRAFT_01352 | Metacyc        | PWY-3841: folate transformations II                                                         |          |
| 2558670684 | DRAFT_01352 | Metacyc        | PWY-181: photorespiration                                                                   |          |



|            |             |                |                                                                            |          |
|------------|-------------|----------------|----------------------------------------------------------------------------|----------|
| 2558670684 | DRAFT_01352 | Metacyc        | PWY-5497: purine nucleobases degradation II (anaerobic)                    |          |
| 2558670684 | DRAFT_01352 | Metacyc        | GLYSYN-PWY: glycine biosynthesis I                                         |          |
| 2558670684 | DRAFT_01352 | Metacyc        | PWY-2201: folate transformations I                                         |          |
| 2558670684 | DRAFT_01352 | COG_category   | [E] Amino acid transport and metabolism                                    |          |
| 2558670684 | DRAFT_01352 | COG0112        | Glycine/serine hydroxymethyltransferase                                    | 3.00E-82 |
| 2558670684 | DRAFT_01352 | pfam00464      | SHMT                                                                       | 2.10E-33 |
| 2558670684 | DRAFT_01352 | EC:2.1.2.1     | Glycine hydroxymethyltransferase.                                          |          |
| 2558670684 | DRAFT_01352 | KO:K00600      | glycine hydroxymethyltransferase [EC:2.1.2.1]                              | 0.00E+00 |
| 2558670684 | DRAFT_01352 | Locus_type     | CDS                                                                        |          |
| 2558670684 | DRAFT_01352 | Product_name   | Glycine/serine hydroxymethyltransferase                                    |          |
| 2558670684 | DRAFT_01352 | Scaffold       | DRAFT_contig_70_226_len_18807_read_count_299628.30                         |          |
| 2558670684 | DRAFT_01352 | Coordinates    | 12227..13429(+)                                                            |          |
| 2558670684 | DRAFT_01352 | DNA_length     | 1203bp                                                                     |          |
| 2558670684 | DRAFT_01352 | Protein_length | 400aa                                                                      |          |
| 2558670684 | DRAFT_01352 | GC             |                                                                            | 0.58     |
| 2558670685 | DRAFT_01353 | KEGG_module    | M00002: Glycolysis, core module involving three-carbon compounds           |          |
| 2558670685 | DRAFT_01353 | KEGG_module    | M00001: Glycolysis (Embden-Meyerhof pathway), glucose => pyruvate          |          |
| 2558670685 | DRAFT_01353 | KEGG_module    | M00166: Reductive pentose phosphate cycle, RuBP + CO2 => glyceraldehyde-3P |          |
| 2558670685 | DRAFT_01353 | KEGG_module    | M00165: Reductive pentose phosphate cycle (Calvin cycle)                   |          |
| 2558670685 | DRAFT_01353 | IMG_pathway    | 336: Standard Embden-Meyerhof pathway                                      |          |
| 2558670685 | DRAFT_01353 | IMG_pathway    | 359: Conversion of glyceraldehyde-3-phosphate to pyruvate                  |          |
| 2558670685 | DRAFT_01353 | IMG_pathway    | 527: Calvin cycle                                                          |          |
| 2558670685 | DRAFT_01353 | COG_category   | [G] Carbohydrate transport and metabolism                                  |          |
| 2558670685 | DRAFT_01353 | COG0057        | Glyceraldehyde-3-phosphate dehydrogenase/erythrose-4-phosphate d           | 9.00E-62 |
| 2558670685 | DRAFT_01353 | pfam00044      | Gp_dh_N                                                                    | 4.50E-19 |
| 2558670685 | DRAFT_01353 | pfam02800      | Gp_dh_C                                                                    | 3.90E-21 |
| 2558670685 | DRAFT_01353 | EC:1.2.1.59    | Glyceraldehyde-3-phosphate dehydrogenase (NAD(P)(+)) (phosphorylating).    |          |
| 2558670685 | DRAFT_01353 | TIGR01546      | glyceraldehyde-3-phosphate dehydrogenase, type II                          | 0.00E+00 |
| 2558670685 | DRAFT_01353 | KO:K00150      | glyceraldehyde-3-phosphate dehydrogenase (NAD(P)) [EC:1.2.1.59]            | 0.00E+00 |
| 2558670685 | DRAFT_01353 | ITERM:07087    | glyceraldehyde 3-phosphate dehydrogenase (NAD(P)+) (EC 1.2.1.59)           |          |
| 2558670685 | DRAFT_01353 | Locus_type     | CDS                                                                        |          |
| 2558670685 | DRAFT_01353 | Product_name   | glyceraldehyde 3-phosphate dehydrogenase (NAD(P)+) (EC 1.2.1.59)           |          |
| 2558670685 | DRAFT_01353 | Scaffold       | DRAFT_contig_70_226_len_18807_read_count_299628.30                         |          |

|            |             |                |                                                                            |           |
|------------|-------------|----------------|----------------------------------------------------------------------------|-----------|
| 2558670685 | DRAFT_01353 | Coordinates    | 13430..14446(-)                                                            |           |
| 2558670685 | DRAFT_01353 | DNA_length     | 1017bp                                                                     |           |
| 2558670685 | DRAFT_01353 | Protein_length | 338aa                                                                      |           |
| 2558670685 | DRAFT_01353 | GC             |                                                                            | 0.6       |
| 2558670686 | DRAFT_01354 | KEGG_module    | M00166: Reductive pentose phosphate cycle, RuBP + CO2 => glyceraldehyde-3P |           |
| 2558670686 | DRAFT_01354 | KEGG_module    | M00165: Reductive pentose phosphate cycle (Calvin cycle)                   |           |
| 2558670686 | DRAFT_01354 | KEGG_module    | M00003: Gluconeogenesis, oxaloacetate => fructose-6P                       |           |
| 2558670686 | DRAFT_01354 | KEGG_module    | M00002: Glycolysis, core module involving three-carbon compounds           |           |
| 2558670686 | DRAFT_01354 | KEGG_module    | M00001: Glycolysis (Embden-Meyerhof pathway), glucose => pyruvate          |           |
| 2558670686 | DRAFT_01354 | Metacyc        | GLUCONEO-PWY: gluconeogenesis I                                            |           |
| 2558670686 | DRAFT_01354 | Metacyc        | SUCSYN-PWY: sucrose biosynthesis                                           |           |
| 2558670686 | DRAFT_01354 | Metacyc        | GLYCOLYSIS: glycolysis I                                                   |           |
| 2558670686 | DRAFT_01354 | Metacyc        | PWY-1042: glycolysis IV (plant cytosol)                                    |           |
| 2558670686 | DRAFT_01354 | Metacyc        | PWY-6886: 1-butanol autotrophic biosynthesis                               |           |
| 2558670686 | DRAFT_01354 | Metacyc        | PWY-6901: xylose degradation IV                                            |           |
| 2558670686 | DRAFT_01354 | Metacyc        | P185-PWY: formaldehyde assimilation III (dihydroxyacetone cycle)           |           |
| 2558670686 | DRAFT_01354 | Metacyc        | PWY-7003: glycerol degradation to butanol                                  |           |
| 2558670686 | DRAFT_01354 | Metacyc        | ANAGLYCOLYSIS-PWY: glycolysis III (glucokinase)                            |           |
| 2558670686 | DRAFT_01354 | Metacyc        | CALVIN-PWY: Calvin-Benson-Bassham cycle                                    |           |
| 2558670686 | DRAFT_01354 | Metacyc        | P124-PWY: Bifidobacterium shunt                                            |           |
| 2558670686 | DRAFT_01354 | Metacyc        | P122-PWY: heterolactic fermentation                                        |           |
| 2558670686 | DRAFT_01354 | Metacyc        | PWY-5484: glycolysis II (from fructose-6P)                                 |           |
| 2558670686 | DRAFT_01354 | IMG_pathway    | 336: Standard Embden-Meyerhof pathway                                      |           |
| 2558670686 | DRAFT_01354 | IMG_pathway    | 359: Conversion of glyceraldehyde-3-phosphate to pyruvate                  |           |
| 2558670686 | DRAFT_01354 | IMG_pathway    | 527: Calvin cycle                                                          |           |
| 2558670686 | DRAFT_01354 | COG_category   | [G] Carbohydrate transport and metabolism                                  |           |
| 2558670686 | DRAFT_01354 | COG0126        | 3-phosphoglycerate kinase                                                  | 2.00E-97  |
| 2558670686 | DRAFT_01354 | pfam00162      | PGK                                                                        | 4.40E-105 |
| 2558670686 | DRAFT_01354 | EC:2.7.2.3     | Phosphoglycerate kinase.                                                   |           |
| 2558670686 | DRAFT_01354 | KO:K00927      | phosphoglycerate kinase [EC:2.7.2.3]                                       | 0.00E+00  |
| 2558670686 | DRAFT_01354 | ITERM:01477    | phosphoglycerate kinase (EC 2.7.2.3)                                       |           |
| 2558670686 | DRAFT_01354 | Locus_type     | CDS                                                                        |           |
| 2558670686 | DRAFT_01354 | Product_name   | phosphoglycerate kinase (EC 2.7.2.3)                                       |           |

|            |             |                |                                                    |          |
|------------|-------------|----------------|----------------------------------------------------|----------|
| 2558670686 | DRAFT_01354 | Scaffold       | DRAFT_contig_70_226_len_18807_read_count_299628.30 |          |
| 2558670686 | DRAFT_01354 | Coordinates    | 14471..15700(-)                                    |          |
| 2558670686 | DRAFT_01354 | DNA_length     | 1230bp                                             |          |
| 2558670686 | DRAFT_01354 | Protein_length | 409aa                                              |          |
| 2558670686 | DRAFT_01354 | GC             |                                                    | 0.58     |
|            |             |                |                                                    |          |
| 2558670687 | DRAFT_01355 | Locus_type     | CDS                                                |          |
| 2558670687 | DRAFT_01355 | Product_name   | hypothetical protein                               |          |
| 2558670687 | DRAFT_01355 | Scaffold       | DRAFT_contig_70_226_len_18807_read_count_299628.30 |          |
| 2558670687 | DRAFT_01355 | Coordinates    | 15979..16101(-)                                    |          |
| 2558670687 | DRAFT_01355 | DNA_length     | 123bp                                              |          |
| 2558670687 | DRAFT_01355 | Protein_length | 40aa                                               |          |
| 2558670687 | DRAFT_01355 | GC             |                                                    | 0.51     |
| 2558670687 | DRAFT_01355 | Transmembrane  | Yes                                                |          |
|            |             |                |                                                    |          |
| 2558670688 | DRAFT_01356 | COG_category   | [V] Defense mechanisms                             |          |
| 2558670688 | DRAFT_01356 | COG1968        | Uncharacterized bacitracin resistance protein      | 2.00E-31 |
| 2558670688 | DRAFT_01356 | pfam02673      | BacA                                               | 6.30E-49 |
| 2558670688 | DRAFT_01356 | EC:3.6.1.27    | Undecaprenyl-diphosphate phosphatase.              |          |
| 2558670688 | DRAFT_01356 | TIGR00753      | undecaprenyl-diphosphate UppP                      | 3.00E-40 |
| 2558670688 | DRAFT_01356 | KO:K06153      | undecaprenyl-diphosphate [EC:3.6.1.27]             | 0.00E+00 |
| 2558670688 | DRAFT_01356 | Locus_type     | CDS                                                |          |
| 2558670688 | DRAFT_01356 | Product_name   | Uncharacterized bacitracin resistance protein      |          |
| 2558670688 | DRAFT_01356 | Scaffold       | DRAFT_contig_70_226_len_18807_read_count_299628.30 |          |
| 2558670688 | DRAFT_01356 | Coordinates    | 16747..17565(-)                                    |          |
| 2558670688 | DRAFT_01356 | DNA_length     | 819bp                                              |          |
| 2558670688 | DRAFT_01356 | Protein_length | 272aa                                              |          |
| 2558670688 | DRAFT_01356 | GC             |                                                    | 0.58     |
| 2558670688 | DRAFT_01356 | Transmembrane  | Yes                                                |          |
| 2558670688 | DRAFT_01356 | Fused_gene     | Yes                                                |          |
|            |             |                |                                                    |          |
| 2558670689 | DRAFT_01357 | Locus_type     | CDS                                                |          |
| 2558670689 | DRAFT_01357 | Product_name   | hypothetical protein                               |          |
| 2558670689 | DRAFT_01357 | Scaffold       | DRAFT_contig_70_226_len_18807_read_count_299628.30 |          |

|            |             |                |                                                         |          |
|------------|-------------|----------------|---------------------------------------------------------|----------|
| 2558670689 | DRAFT_01357 | Coordinates    | 17686..18069(+)                                         |          |
| 2558670689 | DRAFT_01357 | DNA_length     | 384bp                                                   |          |
| 2558670689 | DRAFT_01357 | Protein_length | 127aa                                                   |          |
| 2558670689 | DRAFT_01357 | GC             |                                                         | 0.53     |
| 2558670689 | DRAFT_01357 | Transmembrane  | Yes                                                     |          |
|            |             |                |                                                         |          |
| 2558670690 | DRAFT_01358 | Locus_type     | CDS                                                     |          |
| 2558670690 | DRAFT_01358 | Product_name   | hypothetical protein                                    |          |
| 2558670690 | DRAFT_01358 | Scaffold       | DRAFT_contig_70_226_len_18807_read_count_299628.30      |          |
| 2558670690 | DRAFT_01358 | Coordinates    | 18117..18515(-)                                         |          |
| 2558670690 | DRAFT_01358 | DNA_length     | 399bp                                                   |          |
| 2558670690 | DRAFT_01358 | Protein_length | 132aa                                                   |          |
| 2558670690 | DRAFT_01358 | GC             |                                                         | 0.57     |
|            |             |                |                                                         |          |
| 2558670691 | DRAFT_01359 | Locus_type     | CDS                                                     |          |
| 2558670691 | DRAFT_01359 | Product_name   | hypothetical protein                                    |          |
| 2558670691 | DRAFT_01359 | Scaffold       | DRAFT_contig_70_226_len_18807_read_count_299628.30      |          |
| 2558670691 | DRAFT_01359 | Coordinates    | 18512..18739(-)                                         |          |
| 2558670691 | DRAFT_01359 | DNA_length     | 228bp                                                   |          |
| 2558670691 | DRAFT_01359 | Protein_length | 75aa                                                    |          |
| 2558670691 | DRAFT_01359 | GC             |                                                         | 0.57     |
|            |             |                |                                                         |          |
| 2558670692 | DRAFT_01360 | COG_category   | [C] Energy production and conversion                    |          |
| 2558670692 | DRAFT_01360 | COG2025        | Electron transfer flavoprotein, alpha subunit           | 9.00E-34 |
| 2558670692 | DRAFT_01360 | pfam01012      | ETF                                                     | 5.50E-34 |
| 2558670692 | DRAFT_01360 | KO:K03522      | electron transfer flavoprotein alpha subunit            | 4.10E-44 |
| 2558670692 | DRAFT_01360 | ITERM:01638    | electron transfer flavoprotein alpha subunit apoprotein |          |
| 2558670692 | DRAFT_01360 | Locus_type     | CDS                                                     |          |
| 2558670692 | DRAFT_01360 | Product_name   | electron transfer flavoprotein alpha subunit apoprotein |          |
| 2558670692 | DRAFT_01360 | Scaffold       | DRAFT_contig_70_236_len_18515_read_count_318899.31      |          |
| 2558670692 | DRAFT_01360 | Coordinates    | 3..761(-)                                               |          |
| 2558670692 | DRAFT_01360 | DNA_length     | 759bp                                                   |          |
| 2558670692 | DRAFT_01360 | Protein_length | 253aa                                                   |          |
| 2558670692 | DRAFT_01360 | GC             |                                                         | 0.61     |

|            |             |                |                                                                    |          |
|------------|-------------|----------------|--------------------------------------------------------------------|----------|
| 2558670693 | DRAFT_01361 | COG_category   | [C] Energy production and conversion                               |          |
| 2558670693 | DRAFT_01361 | COG0247        | Fe-S oxidoreductase                                                | 8.00E-58 |
| 2558670693 | DRAFT_01361 | pfam02754      | CCG                                                                | 9.50E-18 |
| 2558670693 | DRAFT_01361 | pfam02754      | CCG                                                                | 5.70E-16 |
| 2558670693 | DRAFT_01361 | pfam13183      | Fer4_8                                                             | 1.00E-09 |
| 2558670693 | DRAFT_01361 | Locus_type     | CDS                                                                |          |
| 2558670693 | DRAFT_01361 | Product_name   | Fe-S oxidoreductase                                                |          |
| 2558670693 | DRAFT_01361 | Scaffold       | DRAFT_contig_70_236_len_18515_read_count_318899.31                 |          |
| 2558670693 | DRAFT_01361 | Coordinates    | 745..1881(-)                                                       |          |
| 2558670693 | DRAFT_01361 | DNA_length     | 1137bp                                                             |          |
| 2558670693 | DRAFT_01361 | Protein_length | 378aa                                                              |          |
| 2558670693 | DRAFT_01361 | GC             |                                                                    | 0.63     |
| 2558670694 | DRAFT_01362 | KEGG_module    | M00563: Methanogenesis, methylamine => methane                     |          |
| 2558670694 | DRAFT_01362 | KEGG_module    | M00562: Methanogenesis, dimethylamine => methane                   |          |
| 2558670694 | DRAFT_01362 | KEGG_module    | M00561: Methanogenesis, trimethylamine => methane                  |          |
| 2558670694 | DRAFT_01362 | KEGG_module    | M00567: Methanogenesis, CO2 => methane                             |          |
| 2558670694 | DRAFT_01362 | KEGG_module    | M00356: Methanogenesis, methanol => methane                        |          |
| 2558670694 | DRAFT_01362 | KEGG_module    | M00357: Methanogenesis, acetate => methane                         |          |
| 2558670694 | DRAFT_01362 | KEGG_module    | M00347: Methanogenesis, formate => methane                         |          |
| 2558670694 | DRAFT_01362 | Metacyc        | PWY-5207: coenzyme B/coenzyme M regeneration                       |          |
| 2558670694 | DRAFT_01362 | pfam07992      | Pyr_redox_2                                                        | 1.40E-08 |
| 2558670694 | DRAFT_01362 | pfam02662      | FlpD                                                               | 8.10E-42 |
| 2558670694 | DRAFT_01362 | pfam12838      | Fer4_7                                                             | 3.10E-08 |
| 2558670694 | DRAFT_01362 | pfam07992      | Pyr_redox_2                                                        | 6.10E-10 |
| 2558670694 | DRAFT_01362 | EC:1.8.98.1    | CoB--CoM heterodisulfide reductase.                                |          |
| 2558670694 | DRAFT_01362 | KO:K03388      | heterodisulfide reductase subunit A [EC:1.8.98.1]                  | 0.00E+00 |
| 2558670694 | DRAFT_01362 | Locus_type     | CDS                                                                |          |
| 2558670694 | DRAFT_01362 | Product_name   | Pyridine nucleotide-disulphide oxidoreductase/Methyl-viologen-redu |          |
| 2558670694 | DRAFT_01362 | Scaffold       | DRAFT_contig_70_236_len_18515_read_count_318899.31                 |          |
| 2558670694 | DRAFT_01362 | Coordinates    | 1878..5297(-)                                                      |          |
| 2558670694 | DRAFT_01362 | DNA_length     | 3420bp                                                             |          |
| 2558670694 | DRAFT_01362 | Protein_length | 1139aa                                                             |          |

|            |             |                |                                                                                |          |
|------------|-------------|----------------|--------------------------------------------------------------------------------|----------|
| 2558670694 | DRAFT_01362 | GC             |                                                                                | 0.62     |
| 2558670694 | DRAFT_01362 | Fused_gene     | Yes                                                                            |          |
| 2558670695 | DRAFT_01363 | KEGG_module    | M00311: 2-oxoglutarate:ferredoxin oxidoreductase                               |          |
| 2558670695 | DRAFT_01363 | KEGG_module    | M00011: Citrate cycle, second carbon oxidation, 2-oxoglutarate => oxaloacetate |          |
| 2558670695 | DRAFT_01363 | Metacyc        | PWY-6969: TCA cycle V (2-oxoglutarate:ferredoxin oxidoreductase)               |          |
| 2558670695 | DRAFT_01363 | Metacyc        | P23-PWY: reductive TCA cycle I                                                 |          |
| 2558670695 | DRAFT_01363 | Metacyc        | PWY-5392: reductive TCA cycle II                                               |          |
| 2558670695 | DRAFT_01363 | Metacyc        | P42-PWY: incomplete reductive TCA cycle                                        |          |
| 2558670695 | DRAFT_01363 | Metacyc        | REDCITCYC: TCA cycle III (helicobacter)                                        |          |
| 2558670695 | DRAFT_01363 | COG_category   | [C] Energy production and conversion                                           |          |
| 2558670695 | DRAFT_01363 | COG1014        | Pyruvate:ferredoxin oxidoreductase and related 2-oxoacid:ferredoxin c          | 4.00E-16 |
| 2558670695 | DRAFT_01363 | pfam01558      | POR                                                                            | 2.10E-26 |
| 2558670695 | DRAFT_01363 | EC:1.2.7.3     | 2-oxoglutarate synthase.                                                       |          |
| 2558670695 | DRAFT_01363 | KO:K00177      | 2-oxoglutarate ferredoxin oxidoreductase subunit gamma [EC:1.2.7.3]            | 3.30E-28 |
| 2558670695 | DRAFT_01363 | Locus_type     | CDS                                                                            |          |
| 2558670695 | DRAFT_01363 | Product_name   | Pyruvate:ferredoxin oxidoreductase and related 2-oxoacid:ferredoxin            |          |
| 2558670695 | DRAFT_01363 | Scaffold       | DRAFT_contig_70_236_len_18515_read_count_318899.31                             |          |
| 2558670695 | DRAFT_01363 | Coordinates    | 5290..5844(-)                                                                  |          |
| 2558670695 | DRAFT_01363 | DNA_length     | 555bp                                                                          |          |
| 2558670695 | DRAFT_01363 | Protein_length | 184aa                                                                          |          |
| 2558670695 | DRAFT_01363 | GC             |                                                                                | 0.62     |
| 2558670696 | DRAFT_01364 | KEGG_module    | M00011: Citrate cycle, second carbon oxidation, 2-oxoglutarate => oxaloacetate |          |
| 2558670696 | DRAFT_01364 | KEGG_module    | M00311: 2-oxoglutarate:ferredoxin oxidoreductase                               |          |
| 2558670696 | DRAFT_01364 | Metacyc        | REDCITCYC: TCA cycle III (helicobacter)                                        |          |
| 2558670696 | DRAFT_01364 | Metacyc        | P42-PWY: incomplete reductive TCA cycle                                        |          |
| 2558670696 | DRAFT_01364 | Metacyc        | P23-PWY: reductive TCA cycle I                                                 |          |
| 2558670696 | DRAFT_01364 | Metacyc        | PWY-5392: reductive TCA cycle II                                               |          |
| 2558670696 | DRAFT_01364 | Metacyc        | PWY-6969: TCA cycle V (2-oxoglutarate:ferredoxin oxidoreductase)               |          |
| 2558670696 | DRAFT_01364 | COG_category   | [C] Energy production and conversion                                           |          |
| 2558670696 | DRAFT_01364 | COG1013        | Pyruvate:ferredoxin oxidoreductase and related 2-oxoacid:ferredoxin c          | 5.00E-64 |
| 2558670696 | DRAFT_01364 | pfam02775      | TPP_enzyme_C                                                                   | 1.80E-33 |
| 2558670696 | DRAFT_01364 | EC:1.2.7.3     | 2-oxoglutarate synthase.                                                       |          |

|            |             |                |                                                                                |          |
|------------|-------------|----------------|--------------------------------------------------------------------------------|----------|
| 2558670696 | DRAFT_01364 | KO:K00175      | 2-oxoglutarate ferredoxin oxidoreductase subunit beta [EC:1.2.7.3]             | 0.00E+00 |
| 2558670696 | DRAFT_01364 | Locus_type     | CDS                                                                            |          |
| 2558670696 | DRAFT_01364 | Product_name   | 2-oxoglutarate ferredoxin oxidoreductase, beta subunit (EC 1.2.7.3)            |          |
| 2558670696 | DRAFT_01364 | Scaffold       | DRAFT_contig_70_236_len_18515_read_count_318899.31                             |          |
| 2558670696 | DRAFT_01364 | Coordinates    | 5841..6719(-)                                                                  |          |
| 2558670696 | DRAFT_01364 | DNA_length     | 879bp                                                                          |          |
| 2558670696 | DRAFT_01364 | Protein_length | 292aa                                                                          |          |
| 2558670696 | DRAFT_01364 | GC             |                                                                                | 0.62     |
| 2558670697 | DRAFT_01365 | KEGG_module    | M00311: 2-oxoglutarate:ferredoxin oxidoreductase                               |          |
| 2558670697 | DRAFT_01365 | KEGG_module    | M00173: Reductive citric acid cycle (Arnon-Buchanan cycle)                     |          |
| 2558670697 | DRAFT_01365 | KEGG_module    | M00011: Citrate cycle, second carbon oxidation, 2-oxoglutarate => oxaloacetate |          |
| 2558670697 | DRAFT_01365 | Metacyc        | REDCITCYC: TCA cycle III (helicobacter)                                        |          |
| 2558670697 | DRAFT_01365 | Metacyc        | PWY-5392: reductive TCA cycle II                                               |          |
| 2558670697 | DRAFT_01365 | Metacyc        | PWY-6969: TCA cycle V (2-oxoglutarate:ferredoxin oxidoreductase)               |          |
| 2558670697 | DRAFT_01365 | Metacyc        | P42-PWY: incomplete reductive TCA cycle                                        |          |
| 2558670697 | DRAFT_01365 | Metacyc        | P23-PWY: reductive TCA cycle I                                                 |          |
| 2558670697 | DRAFT_01365 | COG_category   | [C] Energy production and conversion                                           |          |
| 2558670697 | DRAFT_01365 | COG0674        | Pyruvate:ferredoxin oxidoreductase and related 2-oxoacid:ferredoxin c          | 9.00E-72 |
| 2558670697 | DRAFT_01365 | pfam01855      | POR_N                                                                          | 3.20E-63 |
| 2558670697 | DRAFT_01365 | pfam02780      | Transketolase_C                                                                | 1.30E-08 |
| 2558670697 | DRAFT_01365 | EC:1.2.7.3     | 2-oxoglutarate synthase.                                                       |          |
| 2558670697 | DRAFT_01365 | KO:K00174      | 2-oxoglutarate ferredoxin oxidoreductase subunit alpha [EC:1.2.7.3]            | 0.00E+00 |
| 2558670697 | DRAFT_01365 | Locus_type     | CDS                                                                            |          |
| 2558670697 | DRAFT_01365 | Product_name   | 2-oxoglutarate ferredoxin oxidoreductase, alpha subunit (EC 1.2.7.3)           |          |
| 2558670697 | DRAFT_01365 | Scaffold       | DRAFT_contig_70_236_len_18515_read_count_318899.31                             |          |
| 2558670697 | DRAFT_01365 | Coordinates    | 6719..7873(-)                                                                  |          |
| 2558670697 | DRAFT_01365 | DNA_length     | 1155bp                                                                         |          |
| 2558670697 | DRAFT_01365 | Protein_length | 384aa                                                                          |          |
| 2558670697 | DRAFT_01365 | GC             |                                                                                | 0.61     |
| 2558670698 | DRAFT_01366 | KEGG_module    | M00311: 2-oxoglutarate:ferredoxin oxidoreductase                               |          |
| 2558670698 | DRAFT_01366 | KEGG_module    | M00011: Citrate cycle, second carbon oxidation, 2-oxoglutarate => oxaloacetate |          |
| 2558670698 | DRAFT_01366 | Metacyc        | PWY-5392: reductive TCA cycle II                                               |          |

|            |             |                |                                                                     |          |
|------------|-------------|----------------|---------------------------------------------------------------------|----------|
| 2558670698 | DRAFT_01366 | Metacyc        | REDCITCYC: TCA cycle III (helicobacter)                             |          |
| 2558670698 | DRAFT_01366 | Metacyc        | PWY-6969: TCA cycle V (2-oxoglutarate:ferredoxin oxidoreductase)    |          |
| 2558670698 | DRAFT_01366 | Metacyc        | P23-PWY: reductive TCA cycle I                                      |          |
| 2558670698 | DRAFT_01366 | Metacyc        | P42-PWY: incomplete reductive TCA cycle                             |          |
| 2558670698 | DRAFT_01366 | COG_category   | [C] Energy production and conversion                                |          |
| 2558670698 | DRAFT_01366 | COG1146        | Ferredoxin                                                          | 2.00E-04 |
| 2558670698 | DRAFT_01366 | pfam12838      | Fer4_7                                                              | 7.30E-08 |
| 2558670698 | DRAFT_01366 | EC:1.2.7.3     | 2-oxoglutarate synthase.                                            |          |
| 2558670698 | DRAFT_01366 | KO:K00176      | 2-oxoglutarate ferredoxin oxidoreductase subunit delta [EC:1.2.7.3] | 6.80E-17 |
| 2558670698 | DRAFT_01366 | Locus_type     | CDS                                                                 |          |
| 2558670698 | DRAFT_01366 | Product_name   | Ferredoxin                                                          |          |
| 2558670698 | DRAFT_01366 | Scaffold       | DRAFT_contig_70_236_len_18515_read_count_318899.31                  |          |
| 2558670698 | DRAFT_01366 | Coordinates    | 7876..8199(-)                                                       |          |
| 2558670698 | DRAFT_01366 | DNA_length     | 324bp                                                               |          |
| 2558670698 | DRAFT_01366 | Protein_length | 107aa                                                               |          |
| 2558670698 | DRAFT_01366 | GC             |                                                                     | 0.54     |
|            |             |                |                                                                     |          |
| 2558670699 | DRAFT_01367 | Locus_type     | tRNA                                                                |          |
| 2558670699 | DRAFT_01367 | Product_name   | tRNA_Leu_CAA                                                        |          |
| 2558670699 | DRAFT_01367 | Scaffold       | DRAFT_contig_70_236_len_18515_read_count_318899.31                  |          |
| 2558670699 | DRAFT_01367 | Coordinates    | 8422..8530(+)                                                       |          |
| 2558670699 | DRAFT_01367 | DNA_length     | 87bp                                                                |          |
| 2558670699 | DRAFT_01367 | GC             |                                                                     | 0.61     |
|            |             |                |                                                                     |          |
| 2558670700 | DRAFT_01368 | KEGG_module    | M00357: Methanogenesis, acetate => methane                          |          |
| 2558670700 | DRAFT_01368 | Metacyc        | PWY0-1313: acetate conversion to acetyl-CoA                         |          |
| 2558670700 | DRAFT_01368 | Metacyc        | PWY66-161: oxidative ethanol degradation III                        |          |
| 2558670700 | DRAFT_01368 | Metacyc        | GLUDEG-II-PWY: glutamate degradation VII (to butanoate)             |          |
| 2558670700 | DRAFT_01368 | Metacyc        | PWY-6672: <i>cis</i>-genanyl-CoA degradation                        |          |
| 2558670700 | DRAFT_01368 | Metacyc        | PWY66-21: ethanol degradation II                                    |          |
| 2558670700 | DRAFT_01368 | Metacyc        | PWY66-162: ethanol degradation IV                                   |          |
| 2558670700 | DRAFT_01368 | COG_category   | [I] Lipid transport and metabolism                                  |          |
| 2558670700 | DRAFT_01368 | COG0365        | Acyl-coenzyme A synthetases/AMP-(fatty) acid ligases                | 0.00E+00 |
| 2558670700 | DRAFT_01368 | pfam13193      | AMP-binding_C                                                       | 1.60E-18 |



|            |             |                |                                                                                |          |
|------------|-------------|----------------|--------------------------------------------------------------------------------|----------|
| 2558670700 | DRAFT_01368 | pfam00501      | AMP-binding                                                                    | 1.00E-76 |
| 2558670700 | DRAFT_01368 | EC:6.2.1.1     | Acetate--CoA ligase.                                                           |          |
| 2558670700 | DRAFT_01368 | TIGR02188      | acetate--CoA ligase                                                            | 0.00E+00 |
| 2558670700 | DRAFT_01368 | KO:K01895      | acetyl-CoA synthetase [EC:6.2.1.1]                                             | 0.00E+00 |
| 2558670700 | DRAFT_01368 | Locus_type     | CDS                                                                            |          |
| 2558670700 | DRAFT_01368 | Product_name   | Acyl-coenzyme A synthetases/AMP-(fatty) acid ligases                           |          |
| 2558670700 | DRAFT_01368 | Scaffold       | DRAFT_contig_70_236_len_18515_read_count_318899.31                             |          |
| 2558670700 | DRAFT_01368 | Coordinates    | 8797..10728(-)                                                                 |          |
| 2558670700 | DRAFT_01368 | DNA_length     | 1932bp                                                                         |          |
| 2558670700 | DRAFT_01368 | Protein_length | 643aa                                                                          |          |
| 2558670700 | DRAFT_01368 | GC             |                                                                                | 0.58     |
| 2558670701 | DRAFT_01369 | KEGG_module    | M00311: 2-oxoglutarate:ferredoxin oxidoreductase                               |          |
| 2558670701 | DRAFT_01369 | KEGG_module    | M00011: Citrate cycle, second carbon oxidation, 2-oxoglutarate => oxaloacetate |          |
| 2558670701 | DRAFT_01369 | Metacyc        | PWY-5392: reductive TCA cycle II                                               |          |
| 2558670701 | DRAFT_01369 | Metacyc        | PWY-6969: TCA cycle V (2-oxoglutarate:ferredoxin oxidoreductase)               |          |
| 2558670701 | DRAFT_01369 | Metacyc        | P42-PWY: incomplete reductive TCA cycle                                        |          |
| 2558670701 | DRAFT_01369 | Metacyc        | REDCITCYC: TCA cycle III (helicobacter)                                        |          |
| 2558670701 | DRAFT_01369 | Metacyc        | P23-PWY: reductive TCA cycle I                                                 |          |
| 2558670701 | DRAFT_01369 | COG_category   | [C] Energy production and conversion                                           |          |
| 2558670701 | DRAFT_01369 | COG1014        | Pyruvate:ferredoxin oxidoreductase and related 2-oxoacid:ferredoxin c          | 6.00E-26 |
| 2558670701 | DRAFT_01369 | pfam01558      | POR                                                                            | 4.80E-38 |
| 2558670701 | DRAFT_01369 | EC:1.2.7.3     | 2-oxoglutarate synthase.                                                       |          |
| 2558670701 | DRAFT_01369 | TIGR02175      | 2-oxoacid:acceptor oxidoreductase, gamma subunit, pyruvate/2-ketois            | 1.90E-33 |
| 2558670701 | DRAFT_01369 | KO:K00177      | 2-oxoglutarate ferredoxin oxidoreductase subunit gamma [EC:1.2.7.3]            | 1.50E-37 |
| 2558670701 | DRAFT_01369 | Locus_type     | CDS                                                                            |          |
| 2558670701 | DRAFT_01369 | Product_name   | 2-oxoacid:acceptor oxidoreductase, gamma subunit, pyruvate/2-keto              |          |
| 2558670701 | DRAFT_01369 | Scaffold       | DRAFT_contig_70_236_len_18515_read_count_318899.31                             |          |
| 2558670701 | DRAFT_01369 | Coordinates    | 10949..11488(-)                                                                |          |
| 2558670701 | DRAFT_01369 | DNA_length     | 540bp                                                                          |          |
| 2558670701 | DRAFT_01369 | Protein_length | 179aa                                                                          |          |
| 2558670701 | DRAFT_01369 | GC             |                                                                                | 0.58     |
| 2558670702 | DRAFT_01370 | KEGG_module    | M00011: Citrate cycle, second carbon oxidation, 2-oxoglutarate => oxaloacetate |          |

|            |             |                |                                                                                |          |
|------------|-------------|----------------|--------------------------------------------------------------------------------|----------|
| 2558670702 | DRAFT_01370 | KEGG_module    | M00311: 2-oxoglutarate:ferredoxin oxidoreductase                               |          |
| 2558670702 | DRAFT_01370 | Metacyc        | P23-PWY: reductive TCA cycle I                                                 |          |
| 2558670702 | DRAFT_01370 | Metacyc        | PWY-5392: reductive TCA cycle II                                               |          |
| 2558670702 | DRAFT_01370 | Metacyc        | PWY-6969: TCA cycle V (2-oxoglutarate:ferredoxin oxidoreductase)               |          |
| 2558670702 | DRAFT_01370 | Metacyc        | REDCITCYC: TCA cycle III (helicobacter)                                        |          |
| 2558670702 | DRAFT_01370 | Metacyc        | P42-PWY: incomplete reductive TCA cycle                                        |          |
| 2558670702 | DRAFT_01370 | COG_category   | [C] Energy production and conversion                                           |          |
| 2558670702 | DRAFT_01370 | COG1013        | Pyruvate:ferredoxin oxidoreductase and related 2-oxoacid:ferredoxin c          | 2.00E-64 |
| 2558670702 | DRAFT_01370 | pfam02775      | TPP_enzyme_C                                                                   | 4.40E-36 |
| 2558670702 | DRAFT_01370 | EC:1.2.7.3     | 2-oxoglutarate synthase.                                                       |          |
| 2558670702 | DRAFT_01370 | KO:K00175      | 2-oxoglutarate ferredoxin oxidoreductase subunit beta [EC:1.2.7.3]             | 0.00E+00 |
| 2558670702 | DRAFT_01370 | Locus_type     | CDS                                                                            |          |
| 2558670702 | DRAFT_01370 | Product_name   | 2-oxoglutarate ferredoxin oxidoreductase, beta subunit (EC 1.2.7.3)            |          |
| 2558670702 | DRAFT_01370 | Scaffold       | DRAFT_contig_70_236_len_18515_read_count_318899.31                             |          |
| 2558670702 | DRAFT_01370 | Coordinates    | 11472..12305(-)                                                                |          |
| 2558670702 | DRAFT_01370 | DNA_length     | 834bp                                                                          |          |
| 2558670702 | DRAFT_01370 | Protein_length | 277aa                                                                          |          |
| 2558670702 | DRAFT_01370 | GC             |                                                                                | 0.59     |
| 2558670703 | DRAFT_01371 | KEGG_module    | M00173: Reductive citric acid cycle (Arnon-Buchanan cycle)                     |          |
| 2558670703 | DRAFT_01371 | KEGG_module    | M00011: Citrate cycle, second carbon oxidation, 2-oxoglutarate => oxaloacetate |          |
| 2558670703 | DRAFT_01371 | KEGG_module    | M00311: 2-oxoglutarate:ferredoxin oxidoreductase                               |          |
| 2558670703 | DRAFT_01371 | Metacyc        | PWY-5392: reductive TCA cycle II                                               |          |
| 2558670703 | DRAFT_01371 | Metacyc        | REDCITCYC: TCA cycle III (helicobacter)                                        |          |
| 2558670703 | DRAFT_01371 | Metacyc        | P42-PWY: incomplete reductive TCA cycle                                        |          |
| 2558670703 | DRAFT_01371 | Metacyc        | P23-PWY: reductive TCA cycle I                                                 |          |
| 2558670703 | DRAFT_01371 | Metacyc        | PWY-6969: TCA cycle V (2-oxoglutarate:ferredoxin oxidoreductase)               |          |
| 2558670703 | DRAFT_01371 | COG_category   | [C] Energy production and conversion                                           |          |
| 2558670703 | DRAFT_01371 | COG0674        | Pyruvate:ferredoxin oxidoreductase and related 2-oxoacid:ferredoxin c          | 2.00E-70 |
| 2558670703 | DRAFT_01371 | pfam01855      | POR_N                                                                          | 2.90E-70 |
| 2558670703 | DRAFT_01371 | pfam02780      | Transketolase_C                                                                | 5.80E-07 |
| 2558670703 | DRAFT_01371 | EC:1.2.7.3     | 2-oxoglutarate synthase.                                                       |          |
| 2558670703 | DRAFT_01371 | KO:K00174      | 2-oxoglutarate ferredoxin oxidoreductase subunit alpha [EC:1.2.7.3]            | 0.00E+00 |
| 2558670703 | DRAFT_01371 | ITERM:01389    | 2-oxoglutarate ferredoxin oxidoreductase, alpha subunit (EC 1.2.7.3)           |          |

|            |             |                |                                                                      |           |
|------------|-------------|----------------|----------------------------------------------------------------------|-----------|
| 2558670703 | DRAFT_01371 | Locus_type     | CDS                                                                  |           |
| 2558670703 | DRAFT_01371 | Product_name   | 2-oxoglutarate ferredoxin oxidoreductase, alpha subunit (EC 1.2.7.3) |           |
| 2558670703 | DRAFT_01371 | Scaffold       | DRAFT_contig_70_236_len_18515_read_count_318899.31                   |           |
| 2558670703 | DRAFT_01371 | Coordinates    | 12307..13443(-)                                                      |           |
| 2558670703 | DRAFT_01371 | DNA_length     | 1137bp                                                               |           |
| 2558670703 | DRAFT_01371 | Protein_length | 378aa                                                                |           |
| 2558670703 | DRAFT_01371 | GC             |                                                                      | 0.55      |
|            |             |                |                                                                      |           |
| 2558670704 | DRAFT_01372 | COG_category   | [F] Nucleotide transport and metabolism                              |           |
| 2558670704 | DRAFT_01372 | COG0528        | Uridylate kinase                                                     | 6.00E-36  |
| 2558670704 | DRAFT_01372 | pfam00696      | AA_kinase                                                            | 1.60E-29  |
| 2558670704 | DRAFT_01372 | EC:2.7.4.22    | UMP kinase.                                                          |           |
| 2558670704 | DRAFT_01372 | TIGR02076      | uridylate kinase, putative                                           | 9.70E-60  |
| 2558670704 | DRAFT_01372 | KO:K09903      | uridylate kinase [EC:2.7.4.22]                                       | 1.40E-38  |
| 2558670704 | DRAFT_01372 | Locus_type     | CDS                                                                  |           |
| 2558670704 | DRAFT_01372 | Product_name   | uridylate kinase, putative                                           |           |
| 2558670704 | DRAFT_01372 | Scaffold       | DRAFT_contig_70_236_len_18515_read_count_318899.31                   |           |
| 2558670704 | DRAFT_01372 | Coordinates    | 13600..14265(-)                                                      |           |
| 2558670704 | DRAFT_01372 | DNA_length     | 666bp                                                                |           |
| 2558670704 | DRAFT_01372 | Protein_length | 221aa                                                                |           |
| 2558670704 | DRAFT_01372 | GC             |                                                                      | 0.6       |
|            |             |                |                                                                      |           |
| 2558670705 | DRAFT_01373 | COG_category   | [J] Translation, ribosomal structure and biogenesis                  |           |
| 2558670705 | DRAFT_01373 | COG1503        | Peptide chain release factor 1 (eRF1)                                | 2.00E-106 |
| 2558670705 | DRAFT_01373 | pfam03464      | eRF1_2                                                               | 1.20E-31  |
| 2558670705 | DRAFT_01373 | pfam03465      | eRF1_3                                                               | 7.70E-24  |
| 2558670705 | DRAFT_01373 | pfam03463      | eRF1_1                                                               | 1.50E-19  |
| 2558670705 | DRAFT_01373 | TIGR03676      | peptide chain release factor 1, archaeal and eukaryotic forms        | 0.00E+00  |
| 2558670705 | DRAFT_01373 | KO:K03265      | peptide chain release factor subunit 1                               | 0.00E+00  |
| 2558670705 | DRAFT_01373 | Locus_type     | CDS                                                                  |           |
| 2558670705 | DRAFT_01373 | Product_name   | peptide chain release factor 1, archaeal and eukaryotic forms        |           |
| 2558670705 | DRAFT_01373 | Scaffold       | DRAFT_contig_70_236_len_18515_read_count_318899.31                   |           |
| 2558670705 | DRAFT_01373 | Coordinates    | 14403..15653(+)                                                      |           |
| 2558670705 | DRAFT_01373 | DNA_length     | 1251bp                                                               |           |

|            |             |                |                                                      |          |
|------------|-------------|----------------|------------------------------------------------------|----------|
| 2558670705 | DRAFT_01373 | Protein_length | 416aa                                                |          |
| 2558670705 | DRAFT_01373 | GC             |                                                      | 0.57     |
| 2558670706 | DRAFT_01374 | Locus_type     | CDS                                                  |          |
| 2558670706 | DRAFT_01374 | Product_name   | hypothetical protein                                 |          |
| 2558670706 | DRAFT_01374 | Scaffold       | DRAFT_contig_70_236_len_18515_read_count_318899.31   |          |
| 2558670706 | DRAFT_01374 | Coordinates    | 15810..16235(+)                                      |          |
| 2558670706 | DRAFT_01374 | DNA_length     | 426bp                                                |          |
| 2558670706 | DRAFT_01374 | Protein_length | 141aa                                                |          |
| 2558670706 | DRAFT_01374 | GC             |                                                      | 0.55     |
| 2558670706 | DRAFT_01374 | Transmembrane  | Yes                                                  |          |
| 2558670707 | DRAFT_01375 | COG_category   | [J] Translation, ribosomal structure and biogenesis  |          |
| 2558670707 | DRAFT_01375 | COG0012        | Predicted GTPase, probable translation factor        | 1.00E-69 |
| 2558670707 | DRAFT_01375 | pfam01926      | MMR_HSR1                                             | 6.10E-17 |
| 2558670707 | DRAFT_01375 | pfam08438      | MMR_HSR1_C                                           | 2.10E-31 |
| 2558670707 | DRAFT_01375 | pfam02824      | TGS                                                  | 4.30E-08 |
| 2558670707 | DRAFT_01375 | Locus_type     | CDS                                                  |          |
| 2558670707 | DRAFT_01375 | Product_name   | GTP-binding conserved hypothetical protein TIGR00650 |          |
| 2558670707 | DRAFT_01375 | Scaffold       | DRAFT_contig_70_236_len_18515_read_count_318899.31   |          |
| 2558670707 | DRAFT_01375 | Coordinates    | 16308..17522(+)                                      |          |
| 2558670707 | DRAFT_01375 | DNA_length     | 1215bp                                               |          |
| 2558670707 | DRAFT_01375 | Protein_length | 404aa                                                |          |
| 2558670707 | DRAFT_01375 | GC             |                                                      | 0.58     |
| 2558670708 | DRAFT_01376 | Locus_type     | CDS                                                  |          |
| 2558670708 | DRAFT_01376 | Product_name   | hypothetical protein                                 |          |
| 2558670708 | DRAFT_01376 | Scaffold       | DRAFT_contig_70_236_len_18515_read_count_318899.31   |          |
| 2558670708 | DRAFT_01376 | Coordinates    | 17536..18513(+)                                      |          |
| 2558670708 | DRAFT_01376 | DNA_length     | 978bp                                                |          |
| 2558670708 | DRAFT_01376 | Protein_length | 326aa                                                |          |
| 2558670708 | DRAFT_01376 | GC             |                                                      | 0.58     |
| 2558670709 | DRAFT_01377 | Locus_type     | CDS                                                  |          |

|            |             |                |         |                                                    |          |
|------------|-------------|----------------|---------|----------------------------------------------------|----------|
| 2558670709 | DRAFT_01377 | Product_name   |         | hypothetical protein                               |          |
| 2558670709 | DRAFT_01377 | Scaffold       |         | DRAFT_contig_70_243_len_18171_read_count_294079.32 |          |
| 2558670709 | DRAFT_01377 | Coordinates    |         | 152..661(-)                                        |          |
| 2558670709 | DRAFT_01377 | DNA_length     |         | 510bp                                              |          |
| 2558670709 | DRAFT_01377 | Protein_length |         | 169aa                                              |          |
| 2558670709 | DRAFT_01377 | GC             |         |                                                    | 0.53     |
| 2558670709 | DRAFT_01377 | Signal_peptide |         | Yes                                                |          |
| 2558670709 | DRAFT_01377 | Transmembrane  |         | Yes                                                |          |
| 2558670710 | DRAFT_01378 | pfam07760      | DUF1616 |                                                    | 1.80E-19 |
| 2558670710 | DRAFT_01378 | Locus_type     |         | CDS                                                |          |
| 2558670710 | DRAFT_01378 | Product_name   |         | Protein of unknown function (DUF1616)              |          |
| 2558670710 | DRAFT_01378 | Scaffold       |         | DRAFT_contig_70_243_len_18171_read_count_294079.32 |          |
| 2558670710 | DRAFT_01378 | Coordinates    |         | 866..1456(-)                                       |          |
| 2558670710 | DRAFT_01378 | DNA_length     |         | 591bp                                              |          |
| 2558670710 | DRAFT_01378 | Protein_length |         | 196aa                                              |          |
| 2558670710 | DRAFT_01378 | GC             |         |                                                    | 0.54     |
| 2558670710 | DRAFT_01378 | Transmembrane  |         | Yes                                                |          |
| 2558670711 | DRAFT_01379 | pfam07760      | DUF1616 |                                                    | 1.90E-15 |
| 2558670711 | DRAFT_01379 | Locus_type     |         | CDS                                                |          |
| 2558670711 | DRAFT_01379 | Product_name   |         | Protein of unknown function (DUF1616)              |          |
| 2558670711 | DRAFT_01379 | Scaffold       |         | DRAFT_contig_70_243_len_18171_read_count_294079.32 |          |
| 2558670711 | DRAFT_01379 | Coordinates    |         | 1469..1954(-)                                      |          |
| 2558670711 | DRAFT_01379 | DNA_length     |         | 486bp                                              |          |
| 2558670711 | DRAFT_01379 | Protein_length |         | 161aa                                              |          |
| 2558670711 | DRAFT_01379 | GC             |         |                                                    | 0.55     |
| 2558670711 | DRAFT_01379 | Transmembrane  |         | Yes                                                |          |
| 2558670712 | DRAFT_01380 | Locus_type     |         | CDS                                                |          |
| 2558670712 | DRAFT_01380 | Product_name   |         | hypothetical protein                               |          |
| 2558670712 | DRAFT_01380 | Scaffold       |         | DRAFT_contig_70_243_len_18171_read_count_294079.32 |          |
| 2558670712 | DRAFT_01380 | Coordinates    |         | 1951..2442(-)                                      |          |
| 2558670712 | DRAFT_01380 | DNA_length     |         | 492bp                                              |          |

|            |             |                |                                                    |          |
|------------|-------------|----------------|----------------------------------------------------|----------|
| 2558670712 | DRAFT_01380 | Protein_length | 163aa                                              |          |
| 2558670712 | DRAFT_01380 | GC             |                                                    | 0.55     |
| 2558670712 | DRAFT_01380 | Signal_peptide | Yes                                                |          |
| 2558670712 | DRAFT_01380 | Transmembrane  | Yes                                                |          |
| 2558670713 | DRAFT_01381 | Locus_type     | CDS                                                |          |
| 2558670713 | DRAFT_01381 | Product_name   | hypothetical protein                               |          |
| 2558670713 | DRAFT_01381 | Scaffold       | DRAFT_contig_70_243_len_18171_read_count_294079.32 |          |
| 2558670713 | DRAFT_01381 | Coordinates    | 2575..2976(-)                                      |          |
| 2558670713 | DRAFT_01381 | DNA_length     | 402bp                                              |          |
| 2558670713 | DRAFT_01381 | Protein_length | 133aa                                              |          |
| 2558670713 | DRAFT_01381 | GC             |                                                    | 0.53     |
| 2558670714 | DRAFT_01382 | Locus_type     | CDS                                                |          |
| 2558670714 | DRAFT_01382 | Product_name   | hypothetical protein                               |          |
| 2558670714 | DRAFT_01382 | Scaffold       | DRAFT_contig_70_243_len_18171_read_count_294079.32 |          |
| 2558670714 | DRAFT_01382 | Coordinates    | 3104..3334(+)                                      |          |
| 2558670714 | DRAFT_01382 | DNA_length     | 231bp                                              |          |
| 2558670714 | DRAFT_01382 | Protein_length | 76aa                                               |          |
| 2558670714 | DRAFT_01382 | GC             |                                                    | 0.55     |
| 2558670715 | DRAFT_01383 | COG_category   | [K] Transcription                                  |          |
| 2558670715 | DRAFT_01383 | COG3432        | Predicted transcriptional regulator                | 4.00E-08 |
| 2558670715 | DRAFT_01383 | pfam14947      | HTH_45                                             | 2.30E-18 |
| 2558670715 | DRAFT_01383 | Locus_type     | CDS                                                |          |
| 2558670715 | DRAFT_01383 | Product_name   | Predicted transcriptional regulator                |          |
| 2558670715 | DRAFT_01383 | Scaffold       | DRAFT_contig_70_243_len_18171_read_count_294079.32 |          |
| 2558670715 | DRAFT_01383 | Coordinates    | 3515..3835(-)                                      |          |
| 2558670715 | DRAFT_01383 | DNA_length     | 321bp                                              |          |
| 2558670715 | DRAFT_01383 | Protein_length | 106aa                                              |          |
| 2558670715 | DRAFT_01383 | GC             |                                                    | 0.54     |
| 2558670716 | DRAFT_01384 | Locus_type     | CDS                                                |          |
| 2558670716 | DRAFT_01384 | Product_name   | hypothetical protein                               |          |

|            |             |                |                                                                      |          |
|------------|-------------|----------------|----------------------------------------------------------------------|----------|
| 2558670716 | DRAFT_01384 | Scaffold       | DRAFT_contig_70_243_len_18171_read_count_294079.32                   |          |
| 2558670716 | DRAFT_01384 | Coordinates    | 3863..4150(-)                                                        |          |
| 2558670716 | DRAFT_01384 | DNA_length     | 288bp                                                                |          |
| 2558670716 | DRAFT_01384 | Protein_length | 95aa                                                                 |          |
| 2558670716 | DRAFT_01384 | GC             |                                                                      | 0.54     |
|            |             |                |                                                                      |          |
| 2558670717 | DRAFT_01385 | KEGG_module    | M00361: Nucleotide sugar biosynthesis, eukaryotes                    |          |
| 2558670717 | DRAFT_01385 | KEGG_module    | M00362: Nucleotide sugar biosynthesis, prokaryotes                   |          |
| 2558670717 | DRAFT_01385 | Metacyc        | PWY-6527: stachyose degradation                                      |          |
| 2558670717 | DRAFT_01385 | Metacyc        | PWY-6317: galactose degradation I (Leloir pathway)                   |          |
| 2558670717 | DRAFT_01385 | Metacyc        | PWY-3821: galactose degradation III                                  |          |
| 2558670717 | DRAFT_01385 | Metacyc        | COLANSYN-PWY: colanic acid building blocks biosynthesis              |          |
| 2558670717 | DRAFT_01385 | Metacyc        | PWY-6397: mycolyl-arabinogalactan-peptidoglycan complex biosynthesis |          |
| 2558670717 | DRAFT_01385 | COG_category   | [M] Cell wall/membrane/envelope biogenesis                           |          |
| 2558670717 | DRAFT_01385 | COG_category   | [G] Carbohydrate transport and metabolism                            |          |
| 2558670717 | DRAFT_01385 | COG0451        | Nucleoside-diphosphate-sugar epimerases                              | 1.00E-47 |
| 2558670717 | DRAFT_01385 | pfam01370      | Epimerase                                                            | 1.40E-41 |
| 2558670717 | DRAFT_01385 | EC:5.1.3.2     | UDP-glucose 4-epimerase.                                             |          |
| 2558670717 | DRAFT_01385 | KO:K01784      | UDP-glucose 4-epimerase [EC:5.1.3.2]                                 | 0.00E+00 |
| 2558670717 | DRAFT_01385 | Locus_type     | CDS                                                                  |          |
| 2558670717 | DRAFT_01385 | Product_name   | Nucleoside-diphosphate-sugar epimerases                              |          |
| 2558670717 | DRAFT_01385 | Scaffold       | DRAFT_contig_70_243_len_18171_read_count_294079.32                   |          |
| 2558670717 | DRAFT_01385 | Coordinates    | 4482..5453(-)                                                        |          |
| 2558670717 | DRAFT_01385 | DNA_length     | 972bp                                                                |          |
| 2558670717 | DRAFT_01385 | Protein_length | 323aa                                                                |          |
| 2558670717 | DRAFT_01385 | GC             |                                                                      | 0.53     |
|            |             |                |                                                                      |          |
| 2558670718 | DRAFT_01386 | Locus_type     | CDS                                                                  |          |
| 2558670718 | DRAFT_01386 | Product_name   | hypothetical protein                                                 |          |
| 2558670718 | DRAFT_01386 | Scaffold       | DRAFT_contig_70_243_len_18171_read_count_294079.32                   |          |
| 2558670718 | DRAFT_01386 | Coordinates    | 5922..6341(+)                                                        |          |
| 2558670718 | DRAFT_01386 | DNA_length     | 420bp                                                                |          |
| 2558670718 | DRAFT_01386 | Protein_length | 139aa                                                                |          |
| 2558670718 | DRAFT_01386 | GC             |                                                                      | 0.56     |

|            |             |                |                                     |                                                    |          |
|------------|-------------|----------------|-------------------------------------|----------------------------------------------------|----------|
| 2558670718 | DRAFT_01386 | Transmembrane  |                                     | Yes                                                |          |
| 2558670719 | DRAFT_01387 | Locus_type     |                                     | CDS                                                |          |
| 2558670719 | DRAFT_01387 | Product_name   |                                     | hypothetical protein                               |          |
| 2558670719 | DRAFT_01387 | Scaffold       |                                     | DRAFT_contig_70_243_len_18171_read_count_294079.32 |          |
| 2558670719 | DRAFT_01387 | Coordinates    |                                     | 6427..6951(+)                                      |          |
| 2558670719 | DRAFT_01387 | DNA_length     |                                     | 525bp                                              |          |
| 2558670719 | DRAFT_01387 | Protein_length |                                     | 174aa                                              |          |
| 2558670719 | DRAFT_01387 | GC             |                                     |                                                    | 0.57     |
| 2558670719 | DRAFT_01387 | Transmembrane  |                                     | Yes                                                |          |
| 2558670720 | DRAFT_01388 | Locus_type     |                                     | CDS                                                |          |
| 2558670720 | DRAFT_01388 | Product_name   |                                     | hypothetical protein                               |          |
| 2558670720 | DRAFT_01388 | Scaffold       |                                     | DRAFT_contig_70_243_len_18171_read_count_294079.32 |          |
| 2558670720 | DRAFT_01388 | Coordinates    |                                     | 7094..7498(+)                                      |          |
| 2558670720 | DRAFT_01388 | DNA_length     |                                     | 405bp                                              |          |
| 2558670720 | DRAFT_01388 | Protein_length |                                     | 134aa                                              |          |
| 2558670720 | DRAFT_01388 | GC             |                                     |                                                    | 0.58     |
| 2558670721 | DRAFT_01389 | COG_category   | [K] Transcription                   |                                                    |          |
| 2558670721 | DRAFT_01389 | COG3432        | Predicted transcriptional regulator |                                                    | 2.00E-11 |
| 2558670721 | DRAFT_01389 | pfam14947      | HTH_45                              |                                                    | 1.60E-16 |
| 2558670721 | DRAFT_01389 | Locus_type     |                                     | CDS                                                |          |
| 2558670721 | DRAFT_01389 | Product_name   |                                     | Predicted transcriptional regulator                |          |
| 2558670721 | DRAFT_01389 | Scaffold       |                                     | DRAFT_contig_70_243_len_18171_read_count_294079.32 |          |
| 2558670721 | DRAFT_01389 | Coordinates    |                                     | 7588..7902(-)                                      |          |
| 2558670721 | DRAFT_01389 | DNA_length     |                                     | 315bp                                              |          |
| 2558670721 | DRAFT_01389 | Protein_length |                                     | 104aa                                              |          |
| 2558670721 | DRAFT_01389 | GC             |                                     |                                                    | 0.59     |
| 2558670722 | DRAFT_01390 | Locus_type     |                                     | CDS                                                |          |
| 2558670722 | DRAFT_01390 | Product_name   |                                     | hypothetical protein                               |          |
| 2558670722 | DRAFT_01390 | Scaffold       |                                     | DRAFT_contig_70_243_len_18171_read_count_294079.32 |          |
| 2558670722 | DRAFT_01390 | Coordinates    |                                     | 8307..8930(+)                                      |          |



|            |             |                |                                                    |          |
|------------|-------------|----------------|----------------------------------------------------|----------|
| 2558670722 | DRAFT_01390 | DNA_length     | 624bp                                              |          |
| 2558670722 | DRAFT_01390 | Protein_length | 207aa                                              |          |
| 2558670722 | DRAFT_01390 | GC             |                                                    | 0.57     |
|            |             |                |                                                    |          |
| 2558670723 | DRAFT_01391 | Locus_type     | CDS                                                |          |
| 2558670723 | DRAFT_01391 | Product_name   | hypothetical protein                               |          |
| 2558670723 | DRAFT_01391 | Scaffold       | DRAFT_contig_70_243_len_18171_read_count_294079.32 |          |
| 2558670723 | DRAFT_01391 | Coordinates    | 8989..9438(+)                                      |          |
| 2558670723 | DRAFT_01391 | DNA_length     | 450bp                                              |          |
| 2558670723 | DRAFT_01391 | Protein_length | 149aa                                              |          |
| 2558670723 | DRAFT_01391 | GC             |                                                    | 0.56     |
| 2558670723 | DRAFT_01391 | Transmembrane  | Yes                                                |          |
|            |             |                |                                                    |          |
| 2558670724 | DRAFT_01392 | Locus_type     | CDS                                                |          |
| 2558670724 | DRAFT_01392 | Product_name   | hypothetical protein                               |          |
| 2558670724 | DRAFT_01392 | Scaffold       | DRAFT_contig_70_243_len_18171_read_count_294079.32 |          |
| 2558670724 | DRAFT_01392 | Coordinates    | 9489..9950(+)                                      |          |
| 2558670724 | DRAFT_01392 | DNA_length     | 462bp                                              |          |
| 2558670724 | DRAFT_01392 | Protein_length | 153aa                                              |          |
| 2558670724 | DRAFT_01392 | GC             |                                                    | 0.57     |
|            |             |                |                                                    |          |
| 2558670725 | DRAFT_01393 | Locus_type     | CDS                                                |          |
| 2558670725 | DRAFT_01393 | Product_name   | hypothetical protein                               |          |
| 2558670725 | DRAFT_01393 | Scaffold       | DRAFT_contig_70_243_len_18171_read_count_294079.32 |          |
| 2558670725 | DRAFT_01393 | Coordinates    | 10056..10442(+)                                    |          |
| 2558670725 | DRAFT_01393 | DNA_length     | 387bp                                              |          |
| 2558670725 | DRAFT_01393 | Protein_length | 128aa                                              |          |
| 2558670725 | DRAFT_01393 | GC             |                                                    | 0.56     |
|            |             |                |                                                    |          |
| 2558670726 | DRAFT_01394 | COG_category   | [K] Transcription                                  |          |
| 2558670726 | DRAFT_01394 | COG3432        | Predicted transcriptional regulator                | 8.00E-17 |
| 2558670726 | DRAFT_01394 | pfam14947      | HTH_45                                             | 2.60E-19 |
| 2558670726 | DRAFT_01394 | Locus_type     | CDS                                                |          |
| 2558670726 | DRAFT_01394 | Product_name   | Predicted transcriptional regulator                |          |

|            |             |                |                                                             |                                                             |          |
|------------|-------------|----------------|-------------------------------------------------------------|-------------------------------------------------------------|----------|
| 2558670726 | DRAFT_01394 | Scaffold       |                                                             | DRAFT_contig_70_243_len_18171_read_count_294079.32          |          |
| 2558670726 | DRAFT_01394 | Coordinates    |                                                             | 10612..11010(+)                                             |          |
| 2558670726 | DRAFT_01394 | DNA_length     |                                                             | 399bp                                                       |          |
| 2558670726 | DRAFT_01394 | Protein_length |                                                             | 132aa                                                       |          |
| 2558670726 | DRAFT_01394 | GC             |                                                             |                                                             | 0.56     |
|            |             |                |                                                             |                                                             |          |
| 2558670727 | DRAFT_01395 | COG_category   | [K] Transcription                                           |                                                             |          |
| 2558670727 | DRAFT_01395 | COG3432        | Predicted transcriptional regulator                         |                                                             | 3.00E-09 |
| 2558670727 | DRAFT_01395 | pfam14947      | HTH_45                                                      |                                                             | 1.50E-17 |
| 2558670727 | DRAFT_01395 | Locus_type     |                                                             | CDS                                                         |          |
| 2558670727 | DRAFT_01395 | Product_name   |                                                             | Predicted transcriptional regulator                         |          |
| 2558670727 | DRAFT_01395 | Scaffold       |                                                             | DRAFT_contig_70_243_len_18171_read_count_294079.32          |          |
| 2558670727 | DRAFT_01395 | Coordinates    |                                                             | 10970..11296(-)                                             |          |
| 2558670727 | DRAFT_01395 | DNA_length     |                                                             | 327bp                                                       |          |
| 2558670727 | DRAFT_01395 | Protein_length |                                                             | 108aa                                                       |          |
| 2558670727 | DRAFT_01395 | GC             |                                                             |                                                             | 0.55     |
|            |             |                |                                                             |                                                             |          |
| 2558670728 | DRAFT_01396 | COG_category   | [R] General function prediction only                        |                                                             |          |
| 2558670728 | DRAFT_01396 | COG1719        | Predicted hydrocarbon binding protein (contains V4R domain) |                                                             | 3.00E-10 |
| 2558670728 | DRAFT_01396 | pfam02830      | V4R                                                         |                                                             | 5.90E-13 |
| 2558670728 | DRAFT_01396 | Locus_type     |                                                             | CDS                                                         |          |
| 2558670728 | DRAFT_01396 | Product_name   |                                                             | Predicted hydrocarbon binding protein (contains V4R domain) |          |
| 2558670728 | DRAFT_01396 | Scaffold       |                                                             | DRAFT_contig_70_243_len_18171_read_count_294079.32          |          |
| 2558670728 | DRAFT_01396 | Coordinates    |                                                             | 11436..11963(-)                                             |          |
| 2558670728 | DRAFT_01396 | DNA_length     |                                                             | 528bp                                                       |          |
| 2558670728 | DRAFT_01396 | Protein_length |                                                             | 175aa                                                       |          |
| 2558670728 | DRAFT_01396 | GC             |                                                             |                                                             | 0.6      |
|            |             |                |                                                             |                                                             |          |
| 2558670729 | DRAFT_01397 | pfam08241      | Methyltransf_11                                             |                                                             | 7.40E-17 |
| 2558670729 | DRAFT_01397 | Locus_type     |                                                             | CDS                                                         |          |
| 2558670729 | DRAFT_01397 | Product_name   |                                                             | Methylase involved in ubiquinone/menaquinone biosynthesis   |          |
| 2558670729 | DRAFT_01397 | Scaffold       |                                                             | DRAFT_contig_70_243_len_18171_read_count_294079.32          |          |
| 2558670729 | DRAFT_01397 | Coordinates    |                                                             | 12042..12842(-)                                             |          |
| 2558670729 | DRAFT_01397 | DNA_length     |                                                             | 801bp                                                       |          |

|            |             |                |                                                                      |          |
|------------|-------------|----------------|----------------------------------------------------------------------|----------|
| 2558670729 | DRAFT_01397 | Protein_length | 266aa                                                                |          |
| 2558670729 | DRAFT_01397 | GC             |                                                                      | 0.61     |
| 2558670729 | DRAFT_01397 | Transmembrane  | Yes                                                                  |          |
| 2558670730 | DRAFT_01398 | COG_category   | [U] Intracellular trafficking, secretion, and vesicular transport    |          |
| 2558670730 | DRAFT_01398 | COG_category   | [N] Cell motility                                                    |          |
| 2558670730 | DRAFT_01398 | COG1955        | Archaeal flagella assembly protein J                                 | 3.00E-23 |
| 2558670730 | DRAFT_01398 | pfam00482      | T2SF                                                                 | 4.80E-06 |
| 2558670730 | DRAFT_01398 | pfam00482      | T2SF                                                                 | 1.70E-09 |
| 2558670730 | DRAFT_01398 | KO:K07333      | archaeal flagellar protein FlaJ                                      | 0.00E+00 |
| 2558670730 | DRAFT_01398 | Locus_type     | CDS                                                                  |          |
| 2558670730 | DRAFT_01398 | Product_name   | Archaeal flagella assembly protein J                                 |          |
| 2558670730 | DRAFT_01398 | Scaffold       | DRAFT_contig_70_243_len_18171_read_count_294079.32                   |          |
| 2558670730 | DRAFT_01398 | Coordinates    | 12900..14645(-)                                                      |          |
| 2558670730 | DRAFT_01398 | DNA_length     | 1746bp                                                               |          |
| 2558670730 | DRAFT_01398 | Protein_length | 581aa                                                                |          |
| 2558670730 | DRAFT_01398 | GC             |                                                                      | 0.56     |
| 2558670730 | DRAFT_01398 | Transmembrane  | Yes                                                                  |          |
| 2558670730 | DRAFT_01398 | Fused_gene     | Yes                                                                  |          |
| 2558670731 | DRAFT_01399 | COG_category   | [U] Intracellular trafficking, secretion, and vesicular transport    |          |
| 2558670731 | DRAFT_01399 | COG_category   | [N] Cell motility                                                    |          |
| 2558670731 | DRAFT_01399 | COG0630        | Type IV secretory pathway, VirB11 components, and related ATPases ir | 3.00E-77 |
| 2558670731 | DRAFT_01399 | pfam00437      | T2SE                                                                 | 1.90E-47 |
| 2558670731 | DRAFT_01399 | KO:K07332      | archaeal flagellar protein FlaI                                      | 0.00E+00 |
| 2558670731 | DRAFT_01399 | Locus_type     | CDS                                                                  |          |
| 2558670731 | DRAFT_01399 | Product_name   | Type IV secretory pathway, VirB11 components, and related ATPases    |          |
| 2558670731 | DRAFT_01399 | Scaffold       | DRAFT_contig_70_243_len_18171_read_count_294079.32                   |          |
| 2558670731 | DRAFT_01399 | Coordinates    | 14642..16267(-)                                                      |          |
| 2558670731 | DRAFT_01399 | DNA_length     | 1626bp                                                               |          |
| 2558670731 | DRAFT_01399 | Protein_length | 541aa                                                                |          |
| 2558670731 | DRAFT_01399 | GC             |                                                                      | 0.57     |
| 2558670732 | DRAFT_01400 | Locus_type     | CDS                                                                  |          |

|            |             |                |                                                    |          |
|------------|-------------|----------------|----------------------------------------------------|----------|
| 2558670732 | DRAFT_01400 | Product_name   | hypothetical protein                               |          |
| 2558670732 | DRAFT_01400 | Scaffold       | DRAFT_contig_70_243_len_18171_read_count_294079.32 |          |
| 2558670732 | DRAFT_01400 | Coordinates    | 16736..16957(-)                                    |          |
| 2558670732 | DRAFT_01400 | DNA_length     | 222bp                                              |          |
| 2558670732 | DRAFT_01400 | Protein_length | 73aa                                               |          |
| 2558670732 | DRAFT_01400 | GC             |                                                    | 0.52     |
|            |             |                |                                                    |          |
| 2558670733 | DRAFT_01401 | Locus_type     | CDS                                                |          |
| 2558670733 | DRAFT_01401 | Product_name   | hypothetical protein                               |          |
| 2558670733 | DRAFT_01401 | Scaffold       | DRAFT_contig_70_243_len_18171_read_count_294079.32 |          |
| 2558670733 | DRAFT_01401 | Coordinates    | 17005..17436(+)                                    |          |
| 2558670733 | DRAFT_01401 | DNA_length     | 432bp                                              |          |
| 2558670733 | DRAFT_01401 | Protein_length | 143aa                                              |          |
| 2558670733 | DRAFT_01401 | GC             |                                                    | 0.57     |
|            |             |                |                                                    |          |
| 2558670734 | DRAFT_01402 | Locus_type     | CDS                                                |          |
| 2558670734 | DRAFT_01402 | Product_name   | hypothetical protein                               |          |
| 2558670734 | DRAFT_01402 | Scaffold       | DRAFT_contig_70_243_len_18171_read_count_294079.32 |          |
| 2558670734 | DRAFT_01402 | Coordinates    | 17455..18000(+)                                    |          |
| 2558670734 | DRAFT_01402 | DNA_length     | 546bp                                              |          |
| 2558670734 | DRAFT_01402 | Protein_length | 181aa                                              |          |
| 2558670734 | DRAFT_01402 | GC             |                                                    | 0.6      |
|            |             |                |                                                    |          |
| 2558670735 | DRAFT_01403 | Locus_type     | CDS                                                |          |
| 2558670735 | DRAFT_01403 | Product_name   | hypothetical protein                               |          |
| 2558670735 | DRAFT_01403 | Scaffold       | DRAFT_contig_70_243_len_18171_read_count_294079.32 |          |
| 2558670735 | DRAFT_01403 | Coordinates    | 18019..18168(+)                                    |          |
| 2558670735 | DRAFT_01403 | DNA_length     | 150bp                                              |          |
| 2558670735 | DRAFT_01403 | Protein_length | 50aa                                               |          |
| 2558670735 | DRAFT_01403 | GC             |                                                    | 0.55     |
|            |             |                |                                                    |          |
| 2558670736 | DRAFT_01404 | COG_category   | [R] General function prediction only               |          |
| 2558670736 | DRAFT_01404 | COG1201        | Lhr-like helicases                                 | 0.00E+00 |
| 2558670736 | DRAFT_01404 | pfam00271      | Helicase_C                                         | 5.00E-13 |

|            |             |                |                                                                                                 |           |
|------------|-------------|----------------|-------------------------------------------------------------------------------------------------|-----------|
| 2558670736 | DRAFT_01404 | pfam08494      | DEAD_assoc                                                                                      | 4.40E-11  |
| 2558670736 | DRAFT_01404 | pfam00270      | DEAD                                                                                            | 9.90E-31  |
| 2558670736 | DRAFT_01404 | EC:3.6.4.-     | Hydrolases. Acting on acid anhydrides. Acting on acid anhydrides; involved in cellular and subc |           |
| 2558670736 | DRAFT_01404 | KO:K03724      | ATP-dependent helicase Lhr and Lhr-like helicase [EC:3.6.4.-]                                   | 0.00E+00  |
| 2558670736 | DRAFT_01404 | ITERM:05263    | ATP dependent helicase, Lhr family                                                              |           |
| 2558670736 | DRAFT_01404 | Locus_type     | CDS                                                                                             |           |
| 2558670736 | DRAFT_01404 | Product_name   | ATP dependent helicase, Lhr family                                                              |           |
| 2558670736 | DRAFT_01404 | Scaffold       | DRAFT_contig_70_262_len_17398_read_count_287202.33                                              |           |
| 2558670736 | DRAFT_01404 | Coordinates    | 3..2051(-)                                                                                      |           |
| 2558670736 | DRAFT_01404 | DNA_length     | 2049bp                                                                                          |           |
| 2558670736 | DRAFT_01404 | Protein_length | 683aa                                                                                           |           |
| 2558670736 | DRAFT_01404 | GC             |                                                                                                 | 0.59      |
| 2558670737 | DRAFT_01405 | COG_category   | [R] General function prediction only                                                            |           |
| 2558670737 | DRAFT_01405 | COG2522        | Predicted transcriptional regulator                                                             | 4.00E-12  |
| 2558670737 | DRAFT_01405 | Locus_type     | CDS                                                                                             |           |
| 2558670737 | DRAFT_01405 | Product_name   | Predicted transcriptional regulator                                                             |           |
| 2558670737 | DRAFT_01405 | Scaffold       | DRAFT_contig_70_262_len_17398_read_count_287202.33                                              |           |
| 2558670737 | DRAFT_01405 | Coordinates    | 2240..2665(+)                                                                                   |           |
| 2558670737 | DRAFT_01405 | DNA_length     | 426bp                                                                                           |           |
| 2558670737 | DRAFT_01405 | Protein_length | 141aa                                                                                           |           |
| 2558670737 | DRAFT_01405 | GC             |                                                                                                 | 0.58      |
| 2558670738 | DRAFT_01406 | Metacyc        | PWY-6987: lipoate biosynthesis and incorporation III (Bacillus)                                 |           |
| 2558670738 | DRAFT_01406 | Metacyc        | PWY0-1275: lipoate biosynthesis and incorporation II                                            |           |
| 2558670738 | DRAFT_01406 | Metacyc        | PWY0-501: lipoate biosynthesis and incorporation I                                              |           |
| 2558670738 | DRAFT_01406 | COG_category   | [H] Coenzyme transport and metabolism                                                           |           |
| 2558670738 | DRAFT_01406 | COG0320        | Lipoate synthase                                                                                | 3.00E-114 |
| 2558670738 | DRAFT_01406 | pfam04055      | Radical_SAM                                                                                     | 3.30E-09  |
| 2558670738 | DRAFT_01406 | EC:2.8.1.8     | Lipoyl synthase.                                                                                |           |
| 2558670738 | DRAFT_01406 | TIGR00510      | lipoate synthase                                                                                | 2.40E-113 |
| 2558670738 | DRAFT_01406 | KO:K03644      | lipoic acid synthetase [EC:2.8.1.8]                                                             | 0.00E+00  |
| 2558670738 | DRAFT_01406 | Locus_type     | CDS                                                                                             |           |
| 2558670738 | DRAFT_01406 | Product_name   | lipoate synthase                                                                                |           |

|            |             |                |                                                                                |                                                                   |          |
|------------|-------------|----------------|--------------------------------------------------------------------------------|-------------------------------------------------------------------|----------|
| 2558670738 | DRAFT_01406 | Scaffold       |                                                                                | DRAFT_contig_70_262_len_17398_read_count_287202.33                |          |
| 2558670738 | DRAFT_01406 | Coordinates    |                                                                                | 2667..3581(+)                                                     |          |
| 2558670738 | DRAFT_01406 | DNA_length     |                                                                                | 915bp                                                             |          |
| 2558670738 | DRAFT_01406 | Protein_length |                                                                                | 304aa                                                             |          |
| 2558670738 | DRAFT_01406 | GC             |                                                                                |                                                                   | 0.6      |
| 2558670739 | DRAFT_01407 | pfam00364      | Biotin_lipoyl                                                                  |                                                                   | 1.20E-24 |
| 2558670739 | DRAFT_01407 | Locus_type     |                                                                                | CDS                                                               |          |
| 2558670739 | DRAFT_01407 | Product_name   |                                                                                | Pyruvate/2-oxoglutarate dehydrogenase complex, dihydrolipoamide ; |          |
| 2558670739 | DRAFT_01407 | Scaffold       |                                                                                | DRAFT_contig_70_262_len_17398_read_count_287202.33                |          |
| 2558670739 | DRAFT_01407 | Coordinates    |                                                                                | 3646..3930(+)                                                     |          |
| 2558670739 | DRAFT_01407 | DNA_length     |                                                                                | 285bp                                                             |          |
| 2558670739 | DRAFT_01407 | Protein_length |                                                                                | 94aa                                                              |          |
| 2558670739 | DRAFT_01407 | GC             |                                                                                |                                                                   | 0.56     |
| 2558670740 | DRAFT_01408 | KEGG_module    | M00036: Leucine degradation, leucine => acetoacetate + acetyl-CoA              |                                                                   |          |
| 2558670740 | DRAFT_01408 | KEGG_module    | M00009: Citrate cycle (TCA cycle, Krebs cycle)                                 |                                                                   |          |
| 2558670740 | DRAFT_01408 | KEGG_module    | M00011: Citrate cycle, second carbon oxidation, 2-oxoglutarate => oxaloacetate |                                                                   |          |
| 2558670740 | DRAFT_01408 | KEGG_module    | M00307: Pyruvate oxidation, pyruvate => acetyl-CoA                             |                                                                   |          |
| 2558670740 | DRAFT_01408 | Metacyc        | PWY-5084: 2-oxoglutarate decarboxylation to succinyl-CoA                       |                                                                   |          |
| 2558670740 | DRAFT_01408 | Metacyc        | PWY-5046: 2-oxoisovalerate decarboxylation to isobutanoyl-CoA                  |                                                                   |          |
| 2558670740 | DRAFT_01408 | Metacyc        | PYRUVDEHYD-PWY: pyruvate decarboxylation to acetyl CoA                         |                                                                   |          |
| 2558670740 | DRAFT_01408 | Metacyc        | GLYCLEAV-PWY: glycine cleavage                                                 |                                                                   |          |
| 2558670740 | DRAFT_01408 | COG_category   | [C] Energy production and conversion                                           |                                                                   |          |
| 2558670740 | DRAFT_01408 | COG1249        | Pyruvate/2-oxoglutarate dehydrogenase complex, dihydrolipoamide de             | 0.00E+00                                                          |          |
| 2558670740 | DRAFT_01408 | pfam00070      | Pyr_redox                                                                      |                                                                   | 1.80E-21 |
| 2558670740 | DRAFT_01408 | pfam02852      | Pyr_redox_dim                                                                  |                                                                   | 7.40E-37 |
| 2558670740 | DRAFT_01408 | pfam07992      | Pyr_redox_2                                                                    |                                                                   | 8.30E-38 |
| 2558670740 | DRAFT_01408 | EC:1.8.1.4     | Dihydrolipoyl dehydrogenase.                                                   |                                                                   |          |
| 2558670740 | DRAFT_01408 | TIGR01350      | dihydrolipoamide dehydrogenase                                                 |                                                                   | 0.00E+00 |
| 2558670740 | DRAFT_01408 | KO:K00382      | dihydrolipoamide dehydrogenase [EC:1.8.1.4]                                    |                                                                   | 0.00E+00 |
| 2558670740 | DRAFT_01408 | Locus_type     |                                                                                | CDS                                                               |          |
| 2558670740 | DRAFT_01408 | Product_name   |                                                                                | dihydrolipoamide dehydrogenase                                    |          |
| 2558670740 | DRAFT_01408 | Scaffold       |                                                                                | DRAFT_contig_70_262_len_17398_read_count_287202.33                |          |

|            |             |                |                                                                 |           |
|------------|-------------|----------------|-----------------------------------------------------------------|-----------|
| 2558670740 | DRAFT_01408 | Coordinates    | 3992..5389(+)                                                   |           |
| 2558670740 | DRAFT_01408 | DNA_length     | 1398bp                                                          |           |
| 2558670740 | DRAFT_01408 | Protein_length | 465aa                                                           |           |
| 2558670740 | DRAFT_01408 | GC             |                                                                 | 0.6       |
| 2558670741 | DRAFT_01409 | Metacyc        | PWY-6987: lipoate biosynthesis and incorporation III (Bacillus) |           |
| 2558670741 | DRAFT_01409 | Metacyc        | PWY0-501: lipoate biosynthesis and incorporation I              |           |
| 2558670741 | DRAFT_01409 | COG_category   | [H] Coenzyme transport and metabolism                           |           |
| 2558670741 | DRAFT_01409 | COG0321        | Lipoate-protein ligase B                                        | 2.00E-54  |
| 2558670741 | DRAFT_01409 | pfam03099      | BPL_LplA_LipB                                                   | 1.10E-17  |
| 2558670741 | DRAFT_01409 | EC:2.3.1.181   | Lipoyl(octanoyl) transferase.                                   |           |
| 2558670741 | DRAFT_01409 | TIGR00214      | lipoate-protein ligase B                                        | 9.50E-49  |
| 2558670741 | DRAFT_01409 | KO:K03801      | lipoyl(octanoyl) transferase [EC:2.3.1.181]                     | 2.80E-45  |
| 2558670741 | DRAFT_01409 | Locus_type     | CDS                                                             |           |
| 2558670741 | DRAFT_01409 | Product_name   | lipoate-protein ligase B                                        |           |
| 2558670741 | DRAFT_01409 | Scaffold       | DRAFT_contig_70_262_len_17398_read_count_287202.33              |           |
| 2558670741 | DRAFT_01409 | Coordinates    | 5386..6042(+)                                                   |           |
| 2558670741 | DRAFT_01409 | DNA_length     | 657bp                                                           |           |
| 2558670741 | DRAFT_01409 | Protein_length | 218aa                                                           |           |
| 2558670741 | DRAFT_01409 | GC             |                                                                 | 0.61      |
| 2558670742 | DRAFT_01410 | Metacyc        | HYDROXYPRODEG-PWY: 4-hydroxyproline degradation I               |           |
| 2558670742 | DRAFT_01410 | COG_category   | [C] Energy production and conversion                            |           |
| 2558670742 | DRAFT_01410 | COG1012        | NAD-dependent aldehyde dehydrogenases                           | 4.00E-104 |
| 2558670742 | DRAFT_01410 | pfam00171      | Aldedh                                                          | 0.00E+00  |
| 2558670742 | DRAFT_01410 | EC:1.5.1.12    | 1-pyrroline-5-carboxylate dehydrogenase.                        |           |
| 2558670742 | DRAFT_01410 | KO:K00294      | 1-pyrroline-5-carboxylate dehydrogenase [EC:1.5.1.12]           | 0.00E+00  |
| 2558670742 | DRAFT_01410 | Locus_type     | CDS                                                             |           |
| 2558670742 | DRAFT_01410 | Product_name   | NAD-dependent aldehyde dehydrogenases                           |           |
| 2558670742 | DRAFT_01410 | Scaffold       | DRAFT_contig_70_262_len_17398_read_count_287202.33              |           |
| 2558670742 | DRAFT_01410 | Coordinates    | 6066..7646(+)                                                   |           |
| 2558670742 | DRAFT_01410 | DNA_length     | 1581bp                                                          |           |
| 2558670742 | DRAFT_01410 | Protein_length | 526aa                                                           |           |
| 2558670742 | DRAFT_01410 | GC             |                                                                 | 0.61      |

|            |             |                |                                                     |          |
|------------|-------------|----------------|-----------------------------------------------------|----------|
| 2558670743 | DRAFT_01411 | KEGG_module    | M00178: Ribosome, bacteria                          |          |
| 2558670743 | DRAFT_01411 | KEGG_module    | M00179: Ribosome, archaea                           |          |
| 2558670743 | DRAFT_01411 | COG_category   | [J] Translation, ribosomal structure and biogenesis |          |
| 2558670743 | DRAFT_01411 | COG0185        | Ribosomal protein S19                               | 2.00E-26 |
| 2558670743 | DRAFT_01411 | pfam00203      | Ribosomal_S19                                       | 2.00E-25 |
| 2558670743 | DRAFT_01411 | TIGR01025      | ribosomal protein S19(archaeal)/S15(eukaryotic)     | 1.90E-56 |
| 2558670743 | DRAFT_01411 | KO:K02965      | small subunit ribosomal protein S19                 | 4.10E-41 |
| 2558670743 | DRAFT_01411 | Locus_type     | CDS                                                 |          |
| 2558670743 | DRAFT_01411 | Product_name   | SSU ribosomal protein S19P                          |          |
| 2558670743 | DRAFT_01411 | Scaffold       | DRAFT_contig_70_262_len_17398_read_count_287202.33  |          |
| 2558670743 | DRAFT_01411 | Coordinates    | 7819..8214(-)                                       |          |
| 2558670743 | DRAFT_01411 | DNA_length     | 396bp                                               |          |
| 2558670743 | DRAFT_01411 | Protein_length | 131aa                                               |          |
| 2558670743 | DRAFT_01411 | GC             |                                                     | 0.58     |
|            |             |                |                                                     |          |
| 2558670744 | DRAFT_01412 | KEGG_module    | M00179: Ribosome, archaea                           |          |
| 2558670744 | DRAFT_01412 | KEGG_module    | M00178: Ribosome, bacteria                          |          |
| 2558670744 | DRAFT_01412 | COG_category   | [J] Translation, ribosomal structure and biogenesis |          |
| 2558670744 | DRAFT_01412 | COG0090        | Ribosomal protein L2                                | 1.00E-51 |
| 2558670744 | DRAFT_01412 | pfam03947      | Ribosomal_L2_C                                      | 2.20E-38 |
| 2558670744 | DRAFT_01412 | KO:K02886      | large subunit ribosomal protein L2                  | 0.00E+00 |
| 2558670744 | DRAFT_01412 | Locus_type     | CDS                                                 |          |
| 2558670744 | DRAFT_01412 | Product_name   | Ribosomal protein L2                                |          |
| 2558670744 | DRAFT_01412 | Scaffold       | DRAFT_contig_70_262_len_17398_read_count_287202.33  |          |
| 2558670744 | DRAFT_01412 | Coordinates    | 8215..8958(-)                                       |          |
| 2558670744 | DRAFT_01412 | DNA_length     | 744bp                                               |          |
| 2558670744 | DRAFT_01412 | Protein_length | 247aa                                               |          |
| 2558670744 | DRAFT_01412 | GC             |                                                     | 0.6      |
|            |             |                |                                                     |          |
| 2558670745 | DRAFT_01413 | KEGG_module    | M00178: Ribosome, bacteria                          |          |
| 2558670745 | DRAFT_01413 | KEGG_module    | M00179: Ribosome, archaea                           |          |
| 2558670745 | DRAFT_01413 | COG_category   | [J] Translation, ribosomal structure and biogenesis |          |
| 2558670745 | DRAFT_01413 | COG0089        | Ribosomal protein L23                               | 6.00E-13 |



|            |             |                |                                                     |          |
|------------|-------------|----------------|-----------------------------------------------------|----------|
| 2558670745 | DRAFT_01413 | pfam00276      | Ribosomal_L23                                       | 7.10E-15 |
| 2558670745 | DRAFT_01413 | TIGR03636      | archaeal ribosomal protein L23                      | 4.30E-31 |
| 2558670745 | DRAFT_01413 | KO:K02892      | large subunit ribosomal protein L23                 | 7.10E-21 |
| 2558670745 | DRAFT_01413 | Locus_type     | CDS                                                 |          |
| 2558670745 | DRAFT_01413 | Product_name   | Ribosomal protein L23                               |          |
| 2558670745 | DRAFT_01413 | Scaffold       | DRAFT_contig_70_262_len_17398_read_count_287202.33  |          |
| 2558670745 | DRAFT_01413 | Coordinates    | 8962..9228(-)                                       |          |
| 2558670745 | DRAFT_01413 | DNA_length     | 267bp                                               |          |
| 2558670745 | DRAFT_01413 | Protein_length | 88aa                                                |          |
| 2558670745 | DRAFT_01413 | GC             |                                                     | 0.56     |
|            |             |                |                                                     |          |
| 2558670746 | DRAFT_01414 | KEGG_module    | M00177: Ribosome, eukaryotes                        |          |
| 2558670746 | DRAFT_01414 | KEGG_module    | M00179: Ribosome, archaea                           |          |
| 2558670746 | DRAFT_01414 | COG_category   | [J] Translation, ribosomal structure and biogenesis |          |
| 2558670746 | DRAFT_01414 | COG0088        | Ribosomal protein L4                                | 4.00E-20 |
| 2558670746 | DRAFT_01414 | pfam00573      | Ribosomal_L4                                        | 2.40E-28 |
| 2558670746 | DRAFT_01414 | KO:K02930      | large subunit ribosomal protein L4e                 | 4.00E-41 |
| 2558670746 | DRAFT_01414 | Locus_type     | CDS                                                 |          |
| 2558670746 | DRAFT_01414 | Product_name   | Ribosomal protein L4                                |          |
| 2558670746 | DRAFT_01414 | Scaffold       | DRAFT_contig_70_262_len_17398_read_count_287202.33  |          |
| 2558670746 | DRAFT_01414 | Coordinates    | 9218..9874(-)                                       |          |
| 2558670746 | DRAFT_01414 | DNA_length     | 657bp                                               |          |
| 2558670746 | DRAFT_01414 | Protein_length | 218aa                                               |          |
| 2558670746 | DRAFT_01414 | GC             |                                                     | 0.61     |
|            |             |                |                                                     |          |
| 2558670747 | DRAFT_01415 | KEGG_module    | M00178: Ribosome, bacteria                          |          |
| 2558670747 | DRAFT_01415 | KEGG_module    | M00179: Ribosome, archaea                           |          |
| 2558670747 | DRAFT_01415 | COG_category   | [J] Translation, ribosomal structure and biogenesis |          |
| 2558670747 | DRAFT_01415 | COG0087        | Ribosomal protein L3                                | 3.00E-28 |
| 2558670747 | DRAFT_01415 | pfam00297      | Ribosomal_L3                                        | 2.50E-48 |
| 2558670747 | DRAFT_01415 | KO:K02906      | large subunit ribosomal protein L3                  | 0.00E+00 |
| 2558670747 | DRAFT_01415 | Locus_type     | CDS                                                 |          |
| 2558670747 | DRAFT_01415 | Product_name   | Ribosomal protein L3                                |          |
| 2558670747 | DRAFT_01415 | Scaffold       | DRAFT_contig_70_262_len_17398_read_count_287202.33  |          |

|            |             |                |                                                    |          |
|------------|-------------|----------------|----------------------------------------------------|----------|
| 2558670747 | DRAFT_01415 | Coordinates    | 10030..10977(-)                                    |          |
| 2558670747 | DRAFT_01415 | DNA_length     | 948bp                                              |          |
| 2558670747 | DRAFT_01415 | Protein_length | 315aa                                              |          |
| 2558670747 | DRAFT_01415 | GC             |                                                    | 0.6      |
| 2558670748 | DRAFT_01416 | COG_category   | [S] Function unknown                               |          |
| 2558670748 | DRAFT_01416 | COG2106        | Uncharacterized conserved protein                  | 3.00E-45 |
| 2558670748 | DRAFT_01416 | pfam02598      | Methyltrn_RNA_3                                    | 9.40E-47 |
| 2558670748 | DRAFT_01416 | KO:K09142      | hypothetical protein                               | 1.80E-43 |
| 2558670748 | DRAFT_01416 | Locus_type     | CDS                                                |          |
| 2558670748 | DRAFT_01416 | Product_name   | Uncharacterized conserved protein                  |          |
| 2558670748 | DRAFT_01416 | Scaffold       | DRAFT_contig_70_262_len_17398_read_count_287202.33 |          |
| 2558670748 | DRAFT_01416 | Coordinates    | 11029..11844(-)                                    |          |
| 2558670748 | DRAFT_01416 | DNA_length     | 816bp                                              |          |
| 2558670748 | DRAFT_01416 | Protein_length | 271aa                                              |          |
| 2558670748 | DRAFT_01416 | GC             |                                                    | 0.59     |
| 2558670749 | DRAFT_01417 | Locus_type     | CDS                                                |          |
| 2558670749 | DRAFT_01417 | Product_name   | hypothetical protein                               |          |
| 2558670749 | DRAFT_01417 | Scaffold       | DRAFT_contig_70_262_len_17398_read_count_287202.33 |          |
| 2558670749 | DRAFT_01417 | Coordinates    | 11928..13247(+)                                    |          |
| 2558670749 | DRAFT_01417 | DNA_length     | 1320bp                                             |          |
| 2558670749 | DRAFT_01417 | Protein_length | 439aa                                              |          |
| 2558670749 | DRAFT_01417 | GC             |                                                    | 0.6      |
| 2558670749 | DRAFT_01417 | Transmembrane  | Yes                                                |          |
| 2558670750 | DRAFT_01418 | Locus_type     | CDS                                                |          |
| 2558670750 | DRAFT_01418 | Product_name   | hypothetical protein                               |          |
| 2558670750 | DRAFT_01418 | Scaffold       | DRAFT_contig_70_262_len_17398_read_count_287202.33 |          |
| 2558670750 | DRAFT_01418 | Coordinates    | 13300..13602(+)                                    |          |
| 2558670750 | DRAFT_01418 | DNA_length     | 303bp                                              |          |
| 2558670750 | DRAFT_01418 | Protein_length | 100aa                                              |          |
| 2558670750 | DRAFT_01418 | GC             |                                                    | 0.55     |

|            |             |                |                                                    |           |
|------------|-------------|----------------|----------------------------------------------------|-----------|
| 2558670751 | DRAFT_01419 | COG_category   | [G] Carbohydrate transport and metabolism          |           |
| 2558670751 | DRAFT_01419 | COG2814        | Arabinose efflux permease                          | 8.00E-11  |
| 2558670751 | DRAFT_01419 | pfam07690      | MFS_1                                              | 6.10E-53  |
| 2558670751 | DRAFT_01419 | TIGR00711      | drug resistance transporter, EmrB/QacA subfamily   | 2.20E-59  |
| 2558670751 | DRAFT_01419 | Locus_type     | CDS                                                |           |
| 2558670751 | DRAFT_01419 | Product_name   | Arabinose efflux permease                          |           |
| 2558670751 | DRAFT_01419 | Scaffold       | DRAFT_contig_70_262_len_17398_read_count_287202.33 |           |
| 2558670751 | DRAFT_01419 | Coordinates    | 13614..15101(+)                                    |           |
| 2558670751 | DRAFT_01419 | DNA_length     | 1488bp                                             |           |
| 2558670751 | DRAFT_01419 | Protein_length | 495aa                                              |           |
| 2558670751 | DRAFT_01419 | GC             |                                                    | 0.58      |
| 2558670751 | DRAFT_01419 | Transmembrane  | Yes                                                |           |
| 2558670752 | DRAFT_01420 | COG_category   | [S] Function unknown                               |           |
| 2558670752 | DRAFT_01420 | COG3372        | Uncharacterized conserved protein                  | 3.00E-86  |
| 2558670752 | DRAFT_01420 | pfam05626      | DUF790                                             | 1.70E-117 |
| 2558670752 | DRAFT_01420 | KO:K09744      | hypothetical protein                               | 0.00E+00  |
| 2558670752 | DRAFT_01420 | Locus_type     | CDS                                                |           |
| 2558670752 | DRAFT_01420 | Product_name   | Uncharacterized conserved protein                  |           |
| 2558670752 | DRAFT_01420 | Scaffold       | DRAFT_contig_70_262_len_17398_read_count_287202.33 |           |
| 2558670752 | DRAFT_01420 | Coordinates    | 15232..16818(-)                                    |           |
| 2558670752 | DRAFT_01420 | DNA_length     | 1587bp                                             |           |
| 2558670752 | DRAFT_01420 | Protein_length | 528aa                                              |           |
| 2558670752 | DRAFT_01420 | GC             |                                                    | 0.57      |
| 2558670753 | DRAFT_01421 | pfam00271      | Helicase_C                                         | 1.40E-14  |
| 2558670753 | DRAFT_01421 | Locus_type     | CDS                                                |           |
| 2558670753 | DRAFT_01421 | Product_name   | DNA or RNA helicases of superfamily II             |           |
| 2558670753 | DRAFT_01421 | Scaffold       | DRAFT_contig_70_262_len_17398_read_count_287202.33 |           |
| 2558670753 | DRAFT_01421 | Coordinates    | 16818..17396(-)                                    |           |
| 2558670753 | DRAFT_01421 | DNA_length     | 579bp                                              |           |
| 2558670753 | DRAFT_01421 | Protein_length | 192aa                                              |           |
| 2558670753 | DRAFT_01421 | GC             |                                                    | 0.59      |

|            |             |                |                                                                       |          |
|------------|-------------|----------------|-----------------------------------------------------------------------|----------|
| 2558670754 | DRAFT_01422 | COG_category   | [J] Translation, ribosomal structure and biogenesis                   |          |
| 2558670754 | DRAFT_01422 | COG1236        | Predicted exonuclease of the beta-lactamase fold involved in RNA proc | 3.00E-78 |
| 2558670754 | DRAFT_01422 | pfam10996      | Beta-Casp                                                             | 2.90E-17 |
| 2558670754 | DRAFT_01422 | pfam00753      | Lactamase_B                                                           | 9.50E-15 |
| 2558670754 | DRAFT_01422 | pfam07521      | RMMBL                                                                 | 3.20E-05 |
| 2558670754 | DRAFT_01422 | KO:K07577      | putative mRNA 3-end processing factor                                 | 0.00E+00 |
| 2558670754 | DRAFT_01422 | Locus_type     | CDS                                                                   |          |
| 2558670754 | DRAFT_01422 | Product_name   | Predicted exonuclease of the beta-lactamase fold involved in RNA proc |          |
| 2558670754 | DRAFT_01422 | Scaffold       | DRAFT_contig_70_273_len_16991_read_count_274243.34                    |          |
| 2558670754 | DRAFT_01422 | Coordinates    | 2..1276(+)                                                            |          |
| 2558670754 | DRAFT_01422 | DNA_length     | 1275bp                                                                |          |
| 2558670754 | DRAFT_01422 | Protein_length | 424aa                                                                 |          |
| 2558670754 | DRAFT_01422 | GC             |                                                                       | 0.58     |
| 2558670755 | DRAFT_01423 | Locus_type     | CDS                                                                   |          |
| 2558670755 | DRAFT_01423 | Product_name   | hypothetical protein                                                  |          |
| 2558670755 | DRAFT_01423 | Scaffold       | DRAFT_contig_70_273_len_16991_read_count_274243.34                    |          |
| 2558670755 | DRAFT_01423 | Coordinates    | 1273..2151(+)                                                         |          |
| 2558670755 | DRAFT_01423 | DNA_length     | 879bp                                                                 |          |
| 2558670755 | DRAFT_01423 | Protein_length | 292aa                                                                 |          |
| 2558670755 | DRAFT_01423 | GC             |                                                                       | 0.6      |
| 2558670755 | DRAFT_01423 | Transmembrane  | Yes                                                                   |          |
| 2558670756 | DRAFT_01424 | pfam01781      | Ribosomal_L38e                                                        | 3.40E-05 |
| 2558670756 | DRAFT_01424 | Locus_type     | CDS                                                                   |          |
| 2558670756 | DRAFT_01424 | Product_name   | Ribosomal L38e protein family                                         |          |
| 2558670756 | DRAFT_01424 | Scaffold       | DRAFT_contig_70_273_len_16991_read_count_274243.34                    |          |
| 2558670756 | DRAFT_01424 | Coordinates    | 2139..2345(-)                                                         |          |
| 2558670756 | DRAFT_01424 | DNA_length     | 207bp                                                                 |          |
| 2558670756 | DRAFT_01424 | Protein_length | 68aa                                                                  |          |
| 2558670756 | DRAFT_01424 | GC             |                                                                       | 0.56     |
| 2558670757 | DRAFT_01425 | COG_category   | [R] General function prediction only                                  |          |
| 2558670757 | DRAFT_01425 | COG3269        | Predicted RNA-binding protein, contains TRAM domain                   | 9.00E-13 |

|            |             |                |                                                                        |                                                     |          |
|------------|-------------|----------------|------------------------------------------------------------------------|-----------------------------------------------------|----------|
| 2558670757 | DRAFT_01425 | pfam01938      | TRAM                                                                   |                                                     | 1.00E-11 |
| 2558670757 | DRAFT_01425 | Locus_type     |                                                                        | CDS                                                 |          |
| 2558670757 | DRAFT_01425 | Product_name   |                                                                        | Predicted RNA-binding protein, contains TRAM domain |          |
| 2558670757 | DRAFT_01425 | Scaffold       |                                                                        | DRAFT_contig_70_273_len_16991_read_count_274243.34  |          |
| 2558670757 | DRAFT_01425 | Coordinates    |                                                                        | 2620..2928(+)                                       |          |
| 2558670757 | DRAFT_01425 | DNA_length     |                                                                        | 309bp                                               |          |
| 2558670757 | DRAFT_01425 | Protein_length |                                                                        | 102aa                                               |          |
| 2558670757 | DRAFT_01425 | GC             |                                                                        |                                                     | 0.58     |
| 2558670758 | DRAFT_01426 | COG_category   | [L] Replication, recombination and repair                              |                                                     |          |
| 2558670758 | DRAFT_01426 | COG0328        | Ribonuclease HI                                                        |                                                     | 7.00E-16 |
| 2558670758 | DRAFT_01426 | pfam13456      | RVT_3                                                                  |                                                     | 9.00E-18 |
| 2558670758 | DRAFT_01426 | EC:3.1.26.4    | Ribonuclease H.                                                        |                                                     |          |
| 2558670758 | DRAFT_01426 | KO:K03469      | ribonuclease HI [EC:3.1.26.4]                                          |                                                     | 1.70E-26 |
| 2558670758 | DRAFT_01426 | Locus_type     |                                                                        | CDS                                                 |          |
| 2558670758 | DRAFT_01426 | Product_name   |                                                                        | Ribonuclease HI                                     |          |
| 2558670758 | DRAFT_01426 | Scaffold       |                                                                        | DRAFT_contig_70_273_len_16991_read_count_274243.34  |          |
| 2558670758 | DRAFT_01426 | Coordinates    |                                                                        | 3236..3646(+)                                       |          |
| 2558670758 | DRAFT_01426 | DNA_length     |                                                                        | 411bp                                               |          |
| 2558670758 | DRAFT_01426 | Protein_length |                                                                        | 136aa                                               |          |
| 2558670758 | DRAFT_01426 | GC             |                                                                        |                                                     | 0.54     |
| 2558670759 | DRAFT_01427 | pfam13508      | Acetyltransf_7                                                         |                                                     | 6.30E-12 |
| 2558670759 | DRAFT_01427 | Locus_type     |                                                                        | CDS                                                 |          |
| 2558670759 | DRAFT_01427 | Product_name   |                                                                        | Acetyltransferases                                  |          |
| 2558670759 | DRAFT_01427 | Scaffold       |                                                                        | DRAFT_contig_70_273_len_16991_read_count_274243.34  |          |
| 2558670759 | DRAFT_01427 | Coordinates    |                                                                        | 4395..4832(+)                                       |          |
| 2558670759 | DRAFT_01427 | DNA_length     |                                                                        | 438bp                                               |          |
| 2558670759 | DRAFT_01427 | Protein_length |                                                                        | 145aa                                               |          |
| 2558670759 | DRAFT_01427 | GC             |                                                                        |                                                     | 0.5      |
| 2558670760 | DRAFT_01428 | KEGG_module    | M00258: Putative ABC transport system                                  |                                                     |          |
| 2558670760 | DRAFT_01428 | COG_category   | [M] Cell wall/membrane/envelope biogenesis                             |                                                     |          |
| 2558670760 | DRAFT_01428 | COG4591        | ABC-type transport system, involved in lipoprotein release, permease c |                                                     | 2.00E-36 |

|            |             |                |                                                                      |          |
|------------|-------------|----------------|----------------------------------------------------------------------|----------|
| 2558670760 | DRAFT_01428 | pfam12704      | MacB_PCD                                                             | 4.20E-33 |
| 2558670760 | DRAFT_01428 | pfam02687      | FtsX                                                                 | 3.10E-25 |
| 2558670760 | DRAFT_01428 | KO:K02004      | putative ABC transport system permease protein                       | 0.00E+00 |
| 2558670760 | DRAFT_01428 | Locus_type     | CDS                                                                  |          |
| 2558670760 | DRAFT_01428 | Product_name   | ABC-type transport system, involved in lipoprotein release, permease |          |
| 2558670760 | DRAFT_01428 | Scaffold       | DRAFT_contig_70_273_len_16991_read_count_274243.34                   |          |
| 2558670760 | DRAFT_01428 | Coordinates    | 5428..6687(+)                                                        |          |
| 2558670760 | DRAFT_01428 | DNA_length     | 1260bp                                                               |          |
| 2558670760 | DRAFT_01428 | Protein_length | 419aa                                                                |          |
| 2558670760 | DRAFT_01428 | GC             |                                                                      | 0.59     |
| 2558670760 | DRAFT_01428 | Transmembrane  | Yes                                                                  |          |
| 2558670761 | DRAFT_01429 | KEGG_module    | M00258: Putative ABC transport system                                |          |
| 2558670761 | DRAFT_01429 | COG_category   | [V] Defense mechanisms                                               |          |
| 2558670761 | DRAFT_01429 | COG1136        | ABC-type antimicrobial peptide transport system, ATPase component    | 3.00E-79 |
| 2558670761 | DRAFT_01429 | pfam00005      | ABC_tran                                                             | 3.20E-34 |
| 2558670761 | DRAFT_01429 | KO:K02003      | putative ABC transport system ATP-binding protein                    | 0.00E+00 |
| 2558670761 | DRAFT_01429 | Locus_type     | CDS                                                                  |          |
| 2558670761 | DRAFT_01429 | Product_name   | ABC-type antimicrobial peptide transport system, ATPase component    |          |
| 2558670761 | DRAFT_01429 | Scaffold       | DRAFT_contig_70_273_len_16991_read_count_274243.34                   |          |
| 2558670761 | DRAFT_01429 | Coordinates    | 6680..7423(+)                                                        |          |
| 2558670761 | DRAFT_01429 | DNA_length     | 744bp                                                                |          |
| 2558670761 | DRAFT_01429 | Protein_length | 247aa                                                                |          |
| 2558670761 | DRAFT_01429 | GC             |                                                                      | 0.59     |
| 2558670762 | DRAFT_01430 | Locus_type     | CDS                                                                  |          |
| 2558670762 | DRAFT_01430 | Product_name   | hypothetical protein                                                 |          |
| 2558670762 | DRAFT_01430 | Scaffold       | DRAFT_contig_70_273_len_16991_read_count_274243.34                   |          |
| 2558670762 | DRAFT_01430 | Coordinates    | 7566..8072(-)                                                        |          |
| 2558670762 | DRAFT_01430 | DNA_length     | 507bp                                                                |          |
| 2558670762 | DRAFT_01430 | Protein_length | 168aa                                                                |          |
| 2558670762 | DRAFT_01430 | GC             |                                                                      | 0.54     |
| 2558670763 | DRAFT_01431 | pfam13659      | Methyltransf_26                                                      | 1.70E-06 |

|            |             |                |                                                                  |          |
|------------|-------------|----------------|------------------------------------------------------------------|----------|
| 2558670763 | DRAFT_01431 | Locus_type     | CDS                                                              |          |
| 2558670763 | DRAFT_01431 | Product_name   | Methyltransferase domain                                         |          |
| 2558670763 | DRAFT_01431 | Scaffold       | DRAFT_contig_70_273_len_16991_read_count_274243.34               |          |
| 2558670763 | DRAFT_01431 | Coordinates    | 8294..8722(-)                                                    |          |
| 2558670763 | DRAFT_01431 | DNA_length     | 429bp                                                            |          |
| 2558670763 | DRAFT_01431 | Protein_length | 142aa                                                            |          |
| 2558670763 | DRAFT_01431 | GC             |                                                                  | 0.57     |
| 2558670763 | DRAFT_01431 | Transmembrane  | Yes                                                              |          |
| 2558670764 | DRAFT_01432 | COG_category   | [C] Energy production and conversion                             |          |
| 2558670764 | DRAFT_01432 | COG0778        | Nitroreductase                                                   | 5.00E-18 |
| 2558670764 | DRAFT_01432 | pfam00881      | Nitroreductase                                                   | 2.00E-30 |
| 2558670764 | DRAFT_01432 | Locus_type     | CDS                                                              |          |
| 2558670764 | DRAFT_01432 | Product_name   | Nitroreductase                                                   |          |
| 2558670764 | DRAFT_01432 | Scaffold       | DRAFT_contig_70_273_len_16991_read_count_274243.34               |          |
| 2558670764 | DRAFT_01432 | Coordinates    | 8949..9668(+)                                                    |          |
| 2558670764 | DRAFT_01432 | DNA_length     | 720bp                                                            |          |
| 2558670764 | DRAFT_01432 | Protein_length | 239aa                                                            |          |
| 2558670764 | DRAFT_01432 | GC             |                                                                  | 0.57     |
| 2558670765 | DRAFT_01433 | COG_category   | [R] General function prediction only                             |          |
| 2558670765 | DRAFT_01433 | COG0300        | Short-chain dehydrogenases of various substrate specificities    | 2.00E-40 |
| 2558670765 | DRAFT_01433 | pfam00106      | adh_short                                                        | 4.10E-26 |
| 2558670765 | DRAFT_01433 | Locus_type     | CDS                                                              |          |
| 2558670765 | DRAFT_01433 | Product_name   | Short-chain dehydrogenases of various substrate specificities    |          |
| 2558670765 | DRAFT_01433 | Scaffold       | DRAFT_contig_70_273_len_16991_read_count_274243.34               |          |
| 2558670765 | DRAFT_01433 | Coordinates    | 9722..10513(+)                                                   |          |
| 2558670765 | DRAFT_01433 | DNA_length     | 792bp                                                            |          |
| 2558670765 | DRAFT_01433 | Protein_length | 263aa                                                            |          |
| 2558670765 | DRAFT_01433 | GC             |                                                                  | 0.59     |
| 2558670766 | DRAFT_01434 | COG_category   | [O] Posttranslational modification, protein turnover, chaperones |          |
| 2558670766 | DRAFT_01434 | COG1180        | Pyruvate-formate lyase-activating enzyme                         | 1.00E-38 |
| 2558670766 | DRAFT_01434 | pfam04055      | Radical_SAM                                                      | 2.80E-26 |

|            |             |                |                                                                             |           |
|------------|-------------|----------------|-----------------------------------------------------------------------------|-----------|
| 2558670766 | DRAFT_01434 | pfam13353      | Fer4_12                                                                     | 7.00E-12  |
| 2558670766 | DRAFT_01434 | EC:1.97.1.4    | [Formate-C-acetyltransferase]-activating enzyme.                            |           |
| 2558670766 | DRAFT_01434 | TIGR02494      | glycyl-radical enzyme activating protein family                             | 5.90E-105 |
| 2558670766 | DRAFT_01434 | KO:K04069      | pyruvate formate lyase activating enzyme [EC:1.97.1.4]                      | 0.00E+00  |
| 2558670766 | DRAFT_01434 | Locus_type     | CDS                                                                         |           |
| 2558670766 | DRAFT_01434 | Product_name   | glycyl-radical enzyme activating protein family                             |           |
| 2558670766 | DRAFT_01434 | Scaffold       | DRAFT_contig_70_273_len_16991_read_count_274243.34                          |           |
| 2558670766 | DRAFT_01434 | Coordinates    | 10660..11649(-)                                                             |           |
| 2558670766 | DRAFT_01434 | DNA_length     | 990bp                                                                       |           |
| 2558670766 | DRAFT_01434 | Protein_length | 329aa                                                                       |           |
| 2558670766 | DRAFT_01434 | GC             |                                                                             | 0.55      |
| 2558670767 | DRAFT_01435 | Metacyc        | PWY-5493: reductive monocarboxylic acid cycle                               |           |
| 2558670767 | DRAFT_01435 | Metacyc        | PWY4LZ-257: superpathway of fermentation (<i>Chlamydomonas reinhardtii</i>) |           |
| 2558670767 | DRAFT_01435 | Metacyc        | ANARESP1-PWY: respiration (anaerobic)                                       |           |
| 2558670767 | DRAFT_01435 | Metacyc        | FERMENTATION-PWY: mixed acid fermentation                                   |           |
| 2558670767 | DRAFT_01435 | Metacyc        | PWY-5480: pyruvate fermentation to ethanol I                                |           |
| 2558670767 | DRAFT_01435 | Metacyc        | PWY-5485: pyruvate fermentation to acetate IV                               |           |
| 2558670767 | DRAFT_01435 | COG_category   | [C] Energy production and conversion                                        |           |
| 2558670767 | DRAFT_01435 | COG1882        | Pyruvate-formate lyase                                                      | 4.00E-113 |
| 2558670767 | DRAFT_01435 | pfam02901      | PFL                                                                         | 0.00E+00  |
| 2558670767 | DRAFT_01435 | pfam01228      | Gly_radical                                                                 | 1.20E-25  |
| 2558670767 | DRAFT_01435 | EC:2.3.1.54    | Formate C-acetyltransferase.                                                |           |
| 2558670767 | DRAFT_01435 | TIGR01774      | glycyl radical enzyme, PFL2/glycerol dehydratase family                     | 0.00E+00  |
| 2558670767 | DRAFT_01435 | KO:K00656      | formate C-acetyltransferase [EC:2.3.1.54]                                   | 0.00E+00  |
| 2558670767 | DRAFT_01435 | Locus_type     | CDS                                                                         |           |
| 2558670767 | DRAFT_01435 | Product_name   | Pyruvate-formate lyase                                                      |           |
| 2558670767 | DRAFT_01435 | Scaffold       | DRAFT_contig_70_273_len_16991_read_count_274243.34                          |           |
| 2558670767 | DRAFT_01435 | Coordinates    | 11621..14017(-)                                                             |           |
| 2558670767 | DRAFT_01435 | DNA_length     | 2397bp                                                                      |           |
| 2558670767 | DRAFT_01435 | Protein_length | 798aa                                                                       |           |
| 2558670767 | DRAFT_01435 | GC             |                                                                             | 0.55      |
| 2558670768 | DRAFT_01436 | COG_category   | [E] Amino acid transport and metabolism                                     |           |



|            |             |                |                                                                      |          |
|------------|-------------|----------------|----------------------------------------------------------------------|----------|
| 2558670768 | DRAFT_01436 | COG2317        | Zn-dependent carboxypeptidase                                        | 0.00E+00 |
| 2558670768 | DRAFT_01436 | pfam02074      | Peptidase_M32                                                        | 0.00E+00 |
| 2558670768 | DRAFT_01436 | EC:3.4.17.19   | Carboxypeptidase Taq.                                                |          |
| 2558670768 | DRAFT_01436 | KO:K01299      | carboxypeptidase Taq [EC:3.4.17.19]                                  | 0.00E+00 |
| 2558670768 | DRAFT_01436 | Locus_type     | CDS                                                                  |          |
| 2558670768 | DRAFT_01436 | Product_name   | carboxypeptidase Pfu. Metallo peptidase. MEROPS family M32           |          |
| 2558670768 | DRAFT_01436 | Scaffold       | DRAFT_contig_70_273_len_16991_read_count_274243.34                   |          |
| 2558670768 | DRAFT_01436 | Coordinates    | 14188..15858(+)                                                      |          |
| 2558670768 | DRAFT_01436 | DNA_length     | 1671bp                                                               |          |
| 2558670768 | DRAFT_01436 | Protein_length | 556aa                                                                |          |
| 2558670768 | DRAFT_01436 | GC             |                                                                      | 0.6      |
| 2558670769 | DRAFT_01437 | pfam00571      | CBS                                                                  | 9.30E-15 |
| 2558670769 | DRAFT_01437 | pfam00571      | CBS                                                                  | 1.10E-15 |
| 2558670769 | DRAFT_01437 | Locus_type     | CDS                                                                  |          |
| 2558670769 | DRAFT_01437 | Product_name   | Predicted signal-transduction protein containing cAMP-binding and Cl |          |
| 2558670769 | DRAFT_01437 | Scaffold       | DRAFT_contig_70_273_len_16991_read_count_274243.34                   |          |
| 2558670769 | DRAFT_01437 | Coordinates    | 16052..16543(+)                                                      |          |
| 2558670769 | DRAFT_01437 | DNA_length     | 492bp                                                                |          |
| 2558670769 | DRAFT_01437 | Protein_length | 163aa                                                                |          |
| 2558670769 | DRAFT_01437 | GC             |                                                                      | 0.53     |
| 2558670770 | DRAFT_01438 | Locus_type     | CDS                                                                  |          |
| 2558670770 | DRAFT_01438 | Product_name   | hypothetical protein                                                 |          |
| 2558670770 | DRAFT_01438 | Scaffold       | DRAFT_contig_70_273_len_16991_read_count_274243.34                   |          |
| 2558670770 | DRAFT_01438 | Coordinates    | 16703..16990(+)                                                      |          |
| 2558670770 | DRAFT_01438 | DNA_length     | 288bp                                                                |          |
| 2558670770 | DRAFT_01438 | Protein_length | 96aa                                                                 |          |
| 2558670770 | DRAFT_01438 | GC             |                                                                      | 0.52     |
| 2558670771 | DRAFT_01439 | pfam02239      | Cytochrom_D1                                                         | 4.00E-05 |
| 2558670771 | DRAFT_01439 | pfam05568      | ASFV_J13L                                                            | 3.40E-05 |
| 2558670771 | DRAFT_01439 | TIGR02276      | 40-residue YVTN family beta-propeller repeat                         | 2.40E-13 |
| 2558670771 | DRAFT_01439 | Locus_type     | CDS                                                                  |          |

|            |             |                |                                              |                                                                      |          |
|------------|-------------|----------------|----------------------------------------------|----------------------------------------------------------------------|----------|
| 2558670771 | DRAFT_01439 | Product_name   |                                              | 40-residue YVTN family beta-propeller repeat                         |          |
| 2558670771 | DRAFT_01439 | Scaffold       |                                              | DRAFT_contig_70_281_len_16680_read_count_284862.35                   |          |
| 2558670771 | DRAFT_01439 | Coordinates    |                                              | 1..510(+)                                                            |          |
| 2558670771 | DRAFT_01439 | DNA_length     |                                              | 510bp                                                                |          |
| 2558670771 | DRAFT_01439 | Protein_length |                                              | 169aa                                                                |          |
| 2558670771 | DRAFT_01439 | GC             |                                              |                                                                      | 0.55     |
| 2558670771 | DRAFT_01439 | Transmembrane  |                                              | Yes                                                                  |          |
| 2558670772 | DRAFT_01440 | pfam00801      | PKD                                          |                                                                      | 1.50E-08 |
| 2558670772 | DRAFT_01440 | Locus_type     |                                              | CDS                                                                  |          |
| 2558670772 | DRAFT_01440 | Product_name   |                                              | Uncharacterized protein involved in biosynthesis of c-type cytochrom |          |
| 2558670772 | DRAFT_01440 | Scaffold       |                                              | DRAFT_contig_70_281_len_16680_read_count_284862.35                   |          |
| 2558670772 | DRAFT_01440 | Coordinates    |                                              | 709..1818(-)                                                         |          |
| 2558670772 | DRAFT_01440 | DNA_length     |                                              | 1110bp                                                               |          |
| 2558670772 | DRAFT_01440 | Protein_length |                                              | 369aa                                                                |          |
| 2558670772 | DRAFT_01440 | GC             |                                              |                                                                      | 0.57     |
| 2558670772 | DRAFT_01440 | Transmembrane  |                                              | Yes                                                                  |          |
| 2558670773 | DRAFT_01441 | Locus_type     |                                              | CDS                                                                  |          |
| 2558670773 | DRAFT_01441 | Product_name   |                                              | hypothetical protein                                                 |          |
| 2558670773 | DRAFT_01441 | Scaffold       |                                              | DRAFT_contig_70_281_len_16680_read_count_284862.35                   |          |
| 2558670773 | DRAFT_01441 | Coordinates    |                                              | 2084..2755(-)                                                        |          |
| 2558670773 | DRAFT_01441 | DNA_length     |                                              | 672bp                                                                |          |
| 2558670773 | DRAFT_01441 | Protein_length |                                              | 223aa                                                                |          |
| 2558670773 | DRAFT_01441 | GC             |                                              |                                                                      | 0.53     |
| 2558670773 | DRAFT_01441 | Transmembrane  |                                              | Yes                                                                  |          |
| 2558670774 | DRAFT_01442 | COG_category   | [S] Function unknown                         |                                                                      |          |
| 2558670774 | DRAFT_01442 | COG3391        | Uncharacterized conserved protein            |                                                                      | 2.00E-13 |
| 2558670774 | DRAFT_01442 | pfam10282      | Lactonase                                    |                                                                      | 2.10E-04 |
| 2558670774 | DRAFT_01442 | pfam10282      | Lactonase                                    |                                                                      | 2.90E-04 |
| 2558670774 | DRAFT_01442 | TIGR02276      | 40-residue YVTN family beta-propeller repeat |                                                                      | 2.90E-09 |
| 2558670774 | DRAFT_01442 | Locus_type     |                                              | CDS                                                                  |          |
| 2558670774 | DRAFT_01442 | Product_name   |                                              | Uncharacterized conserved protein                                    |          |

|            |             |                |                                                    |
|------------|-------------|----------------|----------------------------------------------------|
| 2558670774 | DRAFT_01442 | Scaffold       | DRAFT_contig_70_281_len_16680_read_count_284862.35 |
| 2558670774 | DRAFT_01442 | Coordinates    | 3044..4408(+)                                      |
| 2558670774 | DRAFT_01442 | DNA_length     | 1365bp                                             |
| 2558670774 | DRAFT_01442 | Protein_length | 454aa                                              |
| 2558670774 | DRAFT_01442 | GC             | 0.56                                               |
| 2558670774 | DRAFT_01442 | Transmembrane  | Yes                                                |
| 2558670775 | DRAFT_01443 | Locus_type     | CDS                                                |
| 2558670775 | DRAFT_01443 | Product_name   | hypothetical protein                               |
| 2558670775 | DRAFT_01443 | Scaffold       | DRAFT_contig_70_281_len_16680_read_count_284862.35 |
| 2558670775 | DRAFT_01443 | Coordinates    | 4834..7479(+)                                      |
| 2558670775 | DRAFT_01443 | DNA_length     | 2646bp                                             |
| 2558670775 | DRAFT_01443 | Protein_length | 881aa                                              |
| 2558670775 | DRAFT_01443 | GC             | 0.56                                               |
| 2558670775 | DRAFT_01443 | Signal_peptide | Yes                                                |
| 2558670775 | DRAFT_01443 | Transmembrane  | Yes                                                |
| 2558670776 | DRAFT_01444 | Locus_type     | CDS                                                |
| 2558670776 | DRAFT_01444 | Product_name   | hypothetical protein                               |
| 2558670776 | DRAFT_01444 | Scaffold       | DRAFT_contig_70_281_len_16680_read_count_284862.35 |
| 2558670776 | DRAFT_01444 | Coordinates    | 7611..8003(+)                                      |
| 2558670776 | DRAFT_01444 | DNA_length     | 393bp                                              |
| 2558670776 | DRAFT_01444 | Protein_length | 130aa                                              |
| 2558670776 | DRAFT_01444 | GC             | 0.59                                               |
| 2558670777 | DRAFT_01445 | Locus_type     | CDS                                                |
| 2558670777 | DRAFT_01445 | Product_name   | hypothetical protein                               |
| 2558670777 | DRAFT_01445 | Scaffold       | DRAFT_contig_70_281_len_16680_read_count_284862.35 |
| 2558670777 | DRAFT_01445 | Coordinates    | 8109..8627(-)                                      |
| 2558670777 | DRAFT_01445 | DNA_length     | 519bp                                              |
| 2558670777 | DRAFT_01445 | Protein_length | 172aa                                              |
| 2558670777 | DRAFT_01445 | GC             | 0.58                                               |
| 2558670777 | DRAFT_01445 | Transmembrane  | Yes                                                |

|            |             |                |                                                                       |           |
|------------|-------------|----------------|-----------------------------------------------------------------------|-----------|
| 2558670778 | DRAFT_01446 | Locus_type     | CDS                                                                   |           |
| 2558670778 | DRAFT_01446 | Product_name   | hypothetical protein                                                  |           |
| 2558670778 | DRAFT_01446 | Scaffold       | DRAFT_contig_70_281_len_16680_read_count_284862.35                    |           |
| 2558670778 | DRAFT_01446 | Coordinates    | 8658..9485(-)                                                         |           |
| 2558670778 | DRAFT_01446 | DNA_length     | 828bp                                                                 |           |
| 2558670778 | DRAFT_01446 | Protein_length | 275aa                                                                 |           |
| 2558670778 | DRAFT_01446 | GC             |                                                                       | 0.55      |
| 2558670778 | DRAFT_01446 | Transmembrane  | Yes                                                                   |           |
| 2558670779 | DRAFT_01447 | KEGG_module    | M00239: Peptides/nickel transport system                              |           |
| 2558670779 | DRAFT_01447 | COG_category   | [E] Amino acid transport and metabolism                               |           |
| 2558670779 | DRAFT_01447 | COG_category   | [P] Inorganic ion transport and metabolism                            |           |
| 2558670779 | DRAFT_01447 | COG0444        | ABC-type dipeptide/oligopeptide/nickel transport system, ATPase com   | 1.00E-90  |
| 2558670779 | DRAFT_01447 | pfam00005      | ABC_tran                                                              | 1.20E-32  |
| 2558670779 | DRAFT_01447 | pfam08352      | oligo_HPY                                                             | 6.70E-18  |
| 2558670779 | DRAFT_01447 | TIGR01727      | oligopeptide/dipeptide ABC transporter, ATP-binding protein, C-termin | 5.00E-28  |
| 2558670779 | DRAFT_01447 | KO:K02032      | peptide/nickel transport system ATP-binding protein                   | 0.00E+00  |
| 2558670779 | DRAFT_01447 | Locus_type     | CDS                                                                   |           |
| 2558670779 | DRAFT_01447 | Product_name   | oligopeptide/dipeptide ABC transporter, ATP-binding protein, C-termin |           |
| 2558670779 | DRAFT_01447 | Scaffold       | DRAFT_contig_70_281_len_16680_read_count_284862.35                    |           |
| 2558670779 | DRAFT_01447 | Coordinates    | 9472..10527(-)                                                        |           |
| 2558670779 | DRAFT_01447 | DNA_length     | 1056bp                                                                |           |
| 2558670779 | DRAFT_01447 | Protein_length | 351aa                                                                 |           |
| 2558670779 | DRAFT_01447 | GC             |                                                                       | 0.58      |
| 2558670780 | DRAFT_01448 | KEGG_module    | M00239: Peptides/nickel transport system                              |           |
| 2558670780 | DRAFT_01448 | COG_category   | [E] Amino acid transport and metabolism                               |           |
| 2558670780 | DRAFT_01448 | COG_category   | [P] Inorganic ion transport and metabolism                            |           |
| 2558670780 | DRAFT_01448 | COG0444        | ABC-type dipeptide/oligopeptide/nickel transport system, ATPase com   | 8.00E-114 |
| 2558670780 | DRAFT_01448 | pfam00005      | ABC_tran                                                              | 6.90E-25  |
| 2558670780 | DRAFT_01448 | pfam08352      | oligo_HPY                                                             | 4.00E-19  |
| 2558670780 | DRAFT_01448 | TIGR01727      | oligopeptide/dipeptide ABC transporter, ATP-binding protein, C-termin | 4.50E-30  |
| 2558670780 | DRAFT_01448 | KO:K02031      | peptide/nickel transport system ATP-binding protein                   | 0.00E+00  |
| 2558670780 | DRAFT_01448 | Locus_type     | CDS                                                                   |           |

|            |             |                |                                                                      |          |
|------------|-------------|----------------|----------------------------------------------------------------------|----------|
| 2558670780 | DRAFT_01448 | Product_name   | ABC-type dipeptide/oligopeptide/nickel transport system, ATPase cor  |          |
| 2558670780 | DRAFT_01448 | Scaffold       | DRAFT_contig_70_281_len_16680_read_count_284862.35                   |          |
| 2558670780 | DRAFT_01448 | Coordinates    | 10527..11480(-)                                                      |          |
| 2558670780 | DRAFT_01448 | DNA_length     | 954bp                                                                |          |
| 2558670780 | DRAFT_01448 | Protein_length | 317aa                                                                |          |
| 2558670780 | DRAFT_01448 | GC             |                                                                      | 0.58     |
| 2558670781 | DRAFT_01449 | KEGG_module    | M00239: Peptides/nickel transport system                             |          |
| 2558670781 | DRAFT_01449 | COG_category   | [P] Inorganic ion transport and metabolism                           |          |
| 2558670781 | DRAFT_01449 | COG_category   | [E] Amino acid transport and metabolism                              |          |
| 2558670781 | DRAFT_01449 | COG1173        | ABC-type dipeptide/oligopeptide/nickel transport systems, permease c | 9.00E-53 |
| 2558670781 | DRAFT_01449 | pfam00528      | BPD_transp_1                                                         | 1.30E-21 |
| 2558670781 | DRAFT_01449 | pfam12911      | OppC_N                                                               | 3.40E-08 |
| 2558670781 | DRAFT_01449 | KO:K02034      | peptide/nickel transport system permease protein                     | 0.00E+00 |
| 2558670781 | DRAFT_01449 | Locus_type     | CDS                                                                  |          |
| 2558670781 | DRAFT_01449 | Product_name   | ABC-type dipeptide/oligopeptide/nickel transport systems, permease   |          |
| 2558670781 | DRAFT_01449 | Scaffold       | DRAFT_contig_70_281_len_16680_read_count_284862.35                   |          |
| 2558670781 | DRAFT_01449 | Coordinates    | 11517..13088(-)                                                      |          |
| 2558670781 | DRAFT_01449 | DNA_length     | 1572bp                                                               |          |
| 2558670781 | DRAFT_01449 | Protein_length | 523aa                                                                |          |
| 2558670781 | DRAFT_01449 | GC             |                                                                      | 0.57     |
| 2558670781 | DRAFT_01449 | Transmembrane  | Yes                                                                  |          |
| 2558670782 | DRAFT_01450 | KEGG_module    | M00239: Peptides/nickel transport system                             |          |
| 2558670782 | DRAFT_01450 | COG_category   | [P] Inorganic ion transport and metabolism                           |          |
| 2558670782 | DRAFT_01450 | COG_category   | [E] Amino acid transport and metabolism                              |          |
| 2558670782 | DRAFT_01450 | COG0601        | ABC-type dipeptide/oligopeptide/nickel transport systems, permease c | 5.00E-58 |
| 2558670782 | DRAFT_01450 | pfam00528      | BPD_transp_1                                                         | 3.60E-39 |
| 2558670782 | DRAFT_01450 | KO:K02033      | peptide/nickel transport system permease protein                     | 0.00E+00 |
| 2558670782 | DRAFT_01450 | Locus_type     | CDS                                                                  |          |
| 2558670782 | DRAFT_01450 | Product_name   | ABC-type dipeptide/oligopeptide/nickel transport systems, permease   |          |
| 2558670782 | DRAFT_01450 | Scaffold       | DRAFT_contig_70_281_len_16680_read_count_284862.35                   |          |
| 2558670782 | DRAFT_01450 | Coordinates    | 13090..14130(-)                                                      |          |
| 2558670782 | DRAFT_01450 | DNA_length     | 1041bp                                                               |          |

|            |             |                |                                                                  |          |
|------------|-------------|----------------|------------------------------------------------------------------|----------|
| 2558670782 | DRAFT_01450 | Protein_length | 346aa                                                            |          |
| 2558670782 | DRAFT_01450 | GC             |                                                                  | 0.52     |
| 2558670782 | DRAFT_01450 | Transmembrane  | Yes                                                              |          |
| 2558670783 | DRAFT_01451 | COG_category   | [S] Function unknown                                             |          |
| 2558670783 | DRAFT_01451 | COG3391        | Uncharacterized conserved protein                                | 4.00E-14 |
| 2558670783 | DRAFT_01451 | pfam10282      | Lactonase                                                        | 3.30E-05 |
| 2558670783 | DRAFT_01451 | TIGR02276      | 40-residue YVTN family beta-propeller repeat                     | 5.40E-15 |
| 2558670783 | DRAFT_01451 | Locus_type     | CDS                                                              |          |
| 2558670783 | DRAFT_01451 | Product_name   | 40-residue YVTN family beta-propeller repeat                     |          |
| 2558670783 | DRAFT_01451 | Scaffold       | DRAFT_contig_70_281_len_16680_read_count_284862.35               |          |
| 2558670783 | DRAFT_01451 | Coordinates    | 14240..15475(+)                                                  |          |
| 2558670783 | DRAFT_01451 | DNA_length     | 1236bp                                                           |          |
| 2558670783 | DRAFT_01451 | Protein_length | 411aa                                                            |          |
| 2558670783 | DRAFT_01451 | GC             |                                                                  | 0.53     |
| 2558670783 | DRAFT_01451 | Transmembrane  | Yes                                                              |          |
| 2558670784 | DRAFT_01452 | COG_category   | [C] Energy production and conversion                             |          |
| 2558670784 | DRAFT_01452 | COG_category   | [O] Posttranslational modification, protein turnover, chaperones |          |
| 2558670784 | DRAFT_01452 | COG0526        | Thiol-disulfide isomerase and thioredoxins                       | 4.00E-07 |
| 2558670784 | DRAFT_01452 | pfam08534      | Redoxin                                                          | 1.40E-12 |
| 2558670784 | DRAFT_01452 | Locus_type     | CDS                                                              |          |
| 2558670784 | DRAFT_01452 | Product_name   | Thiol-disulfide isomerase and thioredoxins                       |          |
| 2558670784 | DRAFT_01452 | Scaffold       | DRAFT_contig_70_281_len_16680_read_count_284862.35               |          |
| 2558670784 | DRAFT_01452 | Coordinates    | 15620..16678(-)                                                  |          |
| 2558670784 | DRAFT_01452 | DNA_length     | 1059bp                                                           |          |
| 2558670784 | DRAFT_01452 | Protein_length | 352aa                                                            |          |
| 2558670784 | DRAFT_01452 | GC             |                                                                  | 0.53     |
| 2558670785 | DRAFT_01453 | KEGG_module    | M00359: Aminoacyl-tRNA biosynthesis, eukaryotes                  |          |
| 2558670785 | DRAFT_01453 | KEGG_module    | M00360: Aminoacyl-tRNA biosynthesis, prokaryotes                 |          |
| 2558670785 | DRAFT_01453 | Metacyc        | TRNA-CHARGING-PWY: tRNA charging                                 |          |
| 2558670785 | DRAFT_01453 | IMG_pathway    | 505: L-valine ligation to tRNA(Val)                              |          |
| 2558670785 | DRAFT_01453 | COG_category   | [J] Translation, ribosomal structure and biogenesis              |          |

|            |             |                |                                                           |           |
|------------|-------------|----------------|-----------------------------------------------------------|-----------|
| 2558670785 | DRAFT_01453 | COG0525        | Valyl-tRNA synthetase                                     | 0.00E+00  |
| 2558670785 | DRAFT_01453 | pfam08264      | Anticodon_1                                               | 1.10E-29  |
| 2558670785 | DRAFT_01453 | pfam00133      | tRNA-synt_1                                               | 2.70E-104 |
| 2558670785 | DRAFT_01453 | EC:6.1.1.9     | Valine--tRNA ligase.                                      |           |
| 2558670785 | DRAFT_01453 | TIGR00422      | valyl-tRNA synthetase                                     | 0.00E+00  |
| 2558670785 | DRAFT_01453 | KO:K01873      | valyl-tRNA synthetase [EC:6.1.1.9]                        | 0.00E+00  |
| 2558670785 | DRAFT_01453 | ITERM:00407    | valyl-tRNA synthetase (EC 6.1.1.9)                        |           |
| 2558670785 | DRAFT_01453 | Locus_type     | CDS                                                       |           |
| 2558670785 | DRAFT_01453 | Product_name   | valyl-tRNA synthetase (EC 6.1.1.9)                        |           |
| 2558670785 | DRAFT_01453 | Scaffold       | DRAFT_contig_70_288_len_16535_read_count_319708.36        |           |
| 2558670785 | DRAFT_01453 | Coordinates    | 51..2390(+)                                               |           |
| 2558670785 | DRAFT_01453 | DNA_length     | 2340bp                                                    |           |
| 2558670785 | DRAFT_01453 | Protein_length | 779aa                                                     |           |
| 2558670785 | DRAFT_01453 | GC             |                                                           | 0.56      |
| 2558670786 | DRAFT_01454 | COG_category   | [R] General function prediction only                      |           |
| 2558670786 | DRAFT_01454 | COG0656        | Aldo/keto reductases, related to diketogulonate reductase | 5.00E-64  |
| 2558670786 | DRAFT_01454 | pfam00248      | Aldo_ket_red                                              | 1.30E-66  |
| 2558670786 | DRAFT_01454 | Locus_type     | CDS                                                       |           |
| 2558670786 | DRAFT_01454 | Product_name   | Aldo/keto reductases, related to diketogulonate reductase |           |
| 2558670786 | DRAFT_01454 | Scaffold       | DRAFT_contig_70_288_len_16535_read_count_319708.36        |           |
| 2558670786 | DRAFT_01454 | Coordinates    | 2473..3279(-)                                             |           |
| 2558670786 | DRAFT_01454 | DNA_length     | 807bp                                                     |           |
| 2558670786 | DRAFT_01454 | Protein_length | 268aa                                                     |           |
| 2558670786 | DRAFT_01454 | GC             |                                                           | 0.56      |
| 2558670787 | DRAFT_01455 | COG_category   | [R] General function prediction only                      |           |
| 2558670787 | DRAFT_01455 | COG1373        | Predicted ATPase (AAA+ superfamily)                       | 1.00E-39  |
| 2558670787 | DRAFT_01455 | pfam13173      | AAA_14                                                    | 1.30E-21  |
| 2558670787 | DRAFT_01455 | pfam13635      | DUF4143                                                   | 2.20E-08  |
| 2558670787 | DRAFT_01455 | Locus_type     | CDS                                                       |           |
| 2558670787 | DRAFT_01455 | Product_name   | Predicted ATPase (AAA+ superfamily)                       |           |
| 2558670787 | DRAFT_01455 | Scaffold       | DRAFT_contig_70_288_len_16535_read_count_319708.36        |           |
| 2558670787 | DRAFT_01455 | Coordinates    | 3957..5459(-)                                             |           |

|            |             |                |                                                    |      |
|------------|-------------|----------------|----------------------------------------------------|------|
| 2558670787 | DRAFT_01455 | DNA_length     | 1503bp                                             |      |
| 2558670787 | DRAFT_01455 | Protein_length | 500aa                                              |      |
| 2558670787 | DRAFT_01455 | GC             |                                                    | 0.46 |
|            |             |                |                                                    |      |
| 2558670788 | DRAFT_01456 | Locus_type     | CDS                                                |      |
| 2558670788 | DRAFT_01456 | Product_name   | hypothetical protein                               |      |
| 2558670788 | DRAFT_01456 | Scaffold       | DRAFT_contig_70_288_len_16535_read_count_319708.36 |      |
| 2558670788 | DRAFT_01456 | Coordinates    | 5594..6580(-)                                      |      |
| 2558670788 | DRAFT_01456 | DNA_length     | 987bp                                              |      |
| 2558670788 | DRAFT_01456 | Protein_length | 328aa                                              |      |
| 2558670788 | DRAFT_01456 | GC             |                                                    | 0.46 |
|            |             |                |                                                    |      |
| 2558670789 | DRAFT_01457 | Locus_type     | CDS                                                |      |
| 2558670789 | DRAFT_01457 | Product_name   | hypothetical protein                               |      |
| 2558670789 | DRAFT_01457 | Scaffold       | DRAFT_contig_70_288_len_16535_read_count_319708.36 |      |
| 2558670789 | DRAFT_01457 | Coordinates    | 6720..6857(+)                                      |      |
| 2558670789 | DRAFT_01457 | DNA_length     | 138bp                                              |      |
| 2558670789 | DRAFT_01457 | Protein_length | 45aa                                               |      |
| 2558670789 | DRAFT_01457 | GC             |                                                    | 0.45 |
|            |             |                |                                                    |      |
| 2558670790 | DRAFT_01458 | Locus_type     | CDS                                                |      |
| 2558670790 | DRAFT_01458 | Product_name   | hypothetical protein                               |      |
| 2558670790 | DRAFT_01458 | Scaffold       | DRAFT_contig_70_288_len_16535_read_count_319708.36 |      |
| 2558670790 | DRAFT_01458 | Coordinates    | 7049..7330(+)                                      |      |
| 2558670790 | DRAFT_01458 | DNA_length     | 282bp                                              |      |
| 2558670790 | DRAFT_01458 | Protein_length | 93aa                                               |      |
| 2558670790 | DRAFT_01458 | GC             |                                                    | 0.49 |
|            |             |                |                                                    |      |
| 2558670791 | DRAFT_01459 | Locus_type     | CDS                                                |      |
| 2558670791 | DRAFT_01459 | Product_name   | hypothetical protein                               |      |
| 2558670791 | DRAFT_01459 | Scaffold       | DRAFT_contig_70_288_len_16535_read_count_319708.36 |      |
| 2558670791 | DRAFT_01459 | Coordinates    | 7327..8043(+)                                      |      |
| 2558670791 | DRAFT_01459 | DNA_length     | 717bp                                              |      |
| 2558670791 | DRAFT_01459 | Protein_length | 238aa                                              |      |



|            |             |                |                                                    |          |
|------------|-------------|----------------|----------------------------------------------------|----------|
| 2558670791 | DRAFT_01459 | GC             |                                                    | 0.48     |
| 2558670791 | DRAFT_01459 | Transmembrane  | Yes                                                |          |
| 2558670792 | DRAFT_01460 | Locus_type     | CDS                                                |          |
| 2558670792 | DRAFT_01460 | Product_name   | hypothetical protein                               |          |
| 2558670792 | DRAFT_01460 | Scaffold       | DRAFT_contig_70_288_len_16535_read_count_319708.36 |          |
| 2558670792 | DRAFT_01460 | Coordinates    | 8206..8964(-)                                      |          |
| 2558670792 | DRAFT_01460 | DNA_length     | 759bp                                              |          |
| 2558670792 | DRAFT_01460 | Protein_length | 252aa                                              |          |
| 2558670792 | DRAFT_01460 | GC             |                                                    | 0.48     |
| 2558670792 | DRAFT_01460 | Transmembrane  | Yes                                                |          |
| 2558670793 | DRAFT_01461 | pfam09195      | Endonuc-BglII                                      | 2.80E-06 |
| 2558670793 | DRAFT_01461 | Locus_type     | CDS                                                |          |
| 2558670793 | DRAFT_01461 | Product_name   | Restriction endonuclease BglII                     |          |
| 2558670793 | DRAFT_01461 | Scaffold       | DRAFT_contig_70_288_len_16535_read_count_319708.36 |          |
| 2558670793 | DRAFT_01461 | Coordinates    | 8984..9277(-)                                      |          |
| 2558670793 | DRAFT_01461 | DNA_length     | 294bp                                              |          |
| 2558670793 | DRAFT_01461 | Protein_length | 97aa                                               |          |
| 2558670793 | DRAFT_01461 | GC             |                                                    | 0.47     |
| 2558670794 | DRAFT_01462 | pfam04014      | Antitoxin-MazE                                     | 1.20E-05 |
| 2558670794 | DRAFT_01462 | Locus_type     | CDS                                                |          |
| 2558670794 | DRAFT_01462 | Product_name   | Antidote-toxin recognition MazE                    |          |
| 2558670794 | DRAFT_01462 | Scaffold       | DRAFT_contig_70_288_len_16535_read_count_319708.36 |          |
| 2558670794 | DRAFT_01462 | Coordinates    | 9316..9486(-)                                      |          |
| 2558670794 | DRAFT_01462 | DNA_length     | 171bp                                              |          |
| 2558670794 | DRAFT_01462 | Protein_length | 56aa                                               |          |
| 2558670794 | DRAFT_01462 | GC             |                                                    | 0.45     |
| 2558670795 | DRAFT_01463 | Locus_type     | CDS                                                |          |
| 2558670795 | DRAFT_01463 | Product_name   | hypothetical protein                               |          |
| 2558670795 | DRAFT_01463 | Scaffold       | DRAFT_contig_70_288_len_16535_read_count_319708.36 |          |
| 2558670795 | DRAFT_01463 | Coordinates    | 9554..10261(+)                                     |          |

|            |             |                |                 |                                                    |          |
|------------|-------------|----------------|-----------------|----------------------------------------------------|----------|
| 2558670795 | DRAFT_01463 | DNA_length     |                 | 708bp                                              |          |
| 2558670795 | DRAFT_01463 | Protein_length |                 | 235aa                                              |          |
| 2558670795 | DRAFT_01463 | GC             |                 |                                                    | 0.52     |
|            |             |                |                 |                                                    |          |
| 2558670796 | DRAFT_01464 | Locus_type     |                 | CDS                                                |          |
| 2558670796 | DRAFT_01464 | Product_name   |                 | hypothetical protein                               |          |
| 2558670796 | DRAFT_01464 | Scaffold       |                 | DRAFT_contig_70_288_len_16535_read_count_319708.36 |          |
| 2558670796 | DRAFT_01464 | Coordinates    |                 | 10689..10832(+)                                    |          |
| 2558670796 | DRAFT_01464 | DNA_length     |                 | 144bp                                              |          |
| 2558670796 | DRAFT_01464 | Protein_length |                 | 47aa                                               |          |
| 2558670796 | DRAFT_01464 | GC             |                 |                                                    | 0.53     |
|            |             |                |                 |                                                    |          |
| 2558670797 | DRAFT_01465 | Locus_type     |                 | CDS                                                |          |
| 2558670797 | DRAFT_01465 | Product_name   |                 | hypothetical protein                               |          |
| 2558670797 | DRAFT_01465 | Scaffold       |                 | DRAFT_contig_70_288_len_16535_read_count_319708.36 |          |
| 2558670797 | DRAFT_01465 | Coordinates    |                 | 10829..11290(+)                                    |          |
| 2558670797 | DRAFT_01465 | DNA_length     |                 | 462bp                                              |          |
| 2558670797 | DRAFT_01465 | Protein_length |                 | 153aa                                              |          |
| 2558670797 | DRAFT_01465 | GC             |                 |                                                    | 0.48     |
|            |             |                |                 |                                                    |          |
| 2558670798 | DRAFT_01466 | Locus_type     |                 | CDS                                                |          |
| 2558670798 | DRAFT_01466 | Product_name   |                 | hypothetical protein                               |          |
| 2558670798 | DRAFT_01466 | Scaffold       |                 | DRAFT_contig_70_288_len_16535_read_count_319708.36 |          |
| 2558670798 | DRAFT_01466 | Coordinates    |                 | 11937..12617(+)                                    |          |
| 2558670798 | DRAFT_01466 | DNA_length     |                 | 681bp                                              |          |
| 2558670798 | DRAFT_01466 | Protein_length |                 | 226aa                                              |          |
| 2558670798 | DRAFT_01466 | GC             |                 |                                                    | 0.47     |
|            |             |                |                 |                                                    |          |
| 2558670799 | DRAFT_01467 | pfam00589      | Phage_integrase |                                                    | 9.20E-18 |
| 2558670799 | DRAFT_01467 | Locus_type     |                 | CDS                                                |          |
| 2558670799 | DRAFT_01467 | Product_name   |                 | Site-specific recombinase XerD                     |          |
| 2558670799 | DRAFT_01467 | Scaffold       |                 | DRAFT_contig_70_288_len_16535_read_count_319708.36 |          |
| 2558670799 | DRAFT_01467 | Coordinates    |                 | 12827..13645(-)                                    |          |
| 2558670799 | DRAFT_01467 | DNA_length     |                 | 819bp                                              |          |

|            |             |                |                                                                    |          |
|------------|-------------|----------------|--------------------------------------------------------------------|----------|
| 2558670799 | DRAFT_01467 | Protein_length | 272aa                                                              |          |
| 2558670799 | DRAFT_01467 | GC             |                                                                    | 0.51     |
| 2558670800 | DRAFT_01468 | Locus_type     | tRNA                                                               |          |
| 2558670800 | DRAFT_01468 | Product_name   | tRNA_Thr_TGT                                                       |          |
| 2558670800 | DRAFT_01468 | Scaffold       | DRAFT_contig_70_288_len_16535_read_count_319708.36                 |          |
| 2558670800 | DRAFT_01468 | Coordinates    | 13879..13952(-)                                                    |          |
| 2558670800 | DRAFT_01468 | DNA_length     | 74bp                                                               |          |
| 2558670800 | DRAFT_01468 | GC             |                                                                    | 0.62     |
| 2558670801 | DRAFT_01469 | Locus_type     | CDS                                                                |          |
| 2558670801 | DRAFT_01469 | Product_name   | hypothetical protein                                               |          |
| 2558670801 | DRAFT_01469 | Scaffold       | DRAFT_contig_70_288_len_16535_read_count_319708.36                 |          |
| 2558670801 | DRAFT_01469 | Coordinates    | 13999..14379(-)                                                    |          |
| 2558670801 | DRAFT_01469 | DNA_length     | 381bp                                                              |          |
| 2558670801 | DRAFT_01469 | Protein_length | 126aa                                                              |          |
| 2558670801 | DRAFT_01469 | GC             |                                                                    | 0.57     |
| 2558670802 | DRAFT_01470 | COG_category   | [L] Replication, recombination and repair                          |          |
| 2558670802 | DRAFT_01470 | COG0389        | Nucleotidyltransferase/DNA polymerase involved in DNA repair       | 1.00E-58 |
| 2558670802 | DRAFT_01470 | pfam11798      | IMS_HHH                                                            | 1.00E-05 |
| 2558670802 | DRAFT_01470 | pfam00817      | IMS                                                                | 1.90E-35 |
| 2558670802 | DRAFT_01470 | pfam11799      | IMS_C                                                              | 9.30E-12 |
| 2558670802 | DRAFT_01470 | EC:2.7.7.7     | DNA-directed DNA polymerase.                                       |          |
| 2558670802 | DRAFT_01470 | KO:K04479      | DNA polymerase IV (archaeal DinB-like DNA polymerase) [EC:2.7.7.7] | 0.00E+00 |
| 2558670802 | DRAFT_01470 | Locus_type     | CDS                                                                |          |
| 2558670802 | DRAFT_01470 | Product_name   | Nucleotidyltransferase/DNA polymerase involved in DNA repair       |          |
| 2558670802 | DRAFT_01470 | Scaffold       | DRAFT_contig_70_288_len_16535_read_count_319708.36                 |          |
| 2558670802 | DRAFT_01470 | Coordinates    | 14384..15484(-)                                                    |          |
| 2558670802 | DRAFT_01470 | DNA_length     | 1101bp                                                             |          |
| 2558670802 | DRAFT_01470 | Protein_length | 366aa                                                              |          |
| 2558670802 | DRAFT_01470 | GC             |                                                                    | 0.57     |
| 2558670803 | DRAFT_01471 | Locus_type     | CDS                                                                |          |

|            |             |                |     |                                                    |          |
|------------|-------------|----------------|-----|----------------------------------------------------|----------|
| 2558670803 | DRAFT_01471 | Product_name   |     | hypothetical protein                               |          |
| 2558670803 | DRAFT_01471 | Scaffold       |     | DRAFT_contig_70_288_len_16535_read_count_319708.36 |          |
| 2558670803 | DRAFT_01471 | Coordinates    |     | 15592..16431(+)                                    |          |
| 2558670803 | DRAFT_01471 | DNA_length     |     | 840bp                                              |          |
| 2558670803 | DRAFT_01471 | Protein_length |     | 279aa                                              |          |
| 2558670803 | DRAFT_01471 | GC             |     |                                                    | 0.57     |
| 2558670803 | DRAFT_01471 | Transmembrane  |     | Yes                                                |          |
| 2558670804 | DRAFT_01472 | pfam01844      | HNH |                                                    | 1.50E-08 |
| 2558670804 | DRAFT_01472 | Locus_type     |     | CDS                                                |          |
| 2558670804 | DRAFT_01472 | Product_name   |     | HNH endonuclease                                   |          |
| 2558670804 | DRAFT_01472 | Scaffold       |     | DRAFT_contig_70_424_len_12921_read_count_259234.37 |          |
| 2558670804 | DRAFT_01472 | Coordinates    |     | 339..659(-)                                        |          |
| 2558670804 | DRAFT_01472 | DNA_length     |     | 321bp                                              |          |
| 2558670804 | DRAFT_01472 | Protein_length |     | 106aa                                              |          |
| 2558670804 | DRAFT_01472 | GC             |     |                                                    | 0.51     |
| 2558670805 | DRAFT_01473 | Locus_type     |     | CDS                                                |          |
| 2558670805 | DRAFT_01473 | Product_name   |     | hypothetical protein                               |          |
| 2558670805 | DRAFT_01473 | Scaffold       |     | DRAFT_contig_70_424_len_12921_read_count_259234.37 |          |
| 2558670805 | DRAFT_01473 | Coordinates    |     | 653..907(-)                                        |          |
| 2558670805 | DRAFT_01473 | DNA_length     |     | 255bp                                              |          |
| 2558670805 | DRAFT_01473 | Protein_length |     | 84aa                                               |          |
| 2558670805 | DRAFT_01473 | GC             |     |                                                    | 0.51     |
| 2558670805 | DRAFT_01473 | Transmembrane  |     | Yes                                                |          |
| 2558670806 | DRAFT_01474 | Locus_type     |     | CDS                                                |          |
| 2558670806 | DRAFT_01474 | Product_name   |     | hypothetical protein                               |          |
| 2558670806 | DRAFT_01474 | Scaffold       |     | DRAFT_contig_70_424_len_12921_read_count_259234.37 |          |
| 2558670806 | DRAFT_01474 | Coordinates    |     | 888..1223(-)                                       |          |
| 2558670806 | DRAFT_01474 | DNA_length     |     | 336bp                                              |          |
| 2558670806 | DRAFT_01474 | Protein_length |     | 111aa                                              |          |
| 2558670806 | DRAFT_01474 | GC             |     |                                                    | 0.51     |
| 2558670806 | DRAFT_01474 | Transmembrane  |     | Yes                                                |          |

|            |             |                |              |                                                             |          |
|------------|-------------|----------------|--------------|-------------------------------------------------------------|----------|
| 2558670807 | DRAFT_01475 | pfam01828      | Peptidase_A4 |                                                             | 9.50E-10 |
| 2558670807 | DRAFT_01475 | Locus_type     |              | CDS                                                         |          |
| 2558670807 | DRAFT_01475 | Product_name   |              | Peptidase A4 family                                         |          |
| 2558670807 | DRAFT_01475 | Scaffold       |              | DRAFT_contig_70_424_len_12921_read_count_259234.37          |          |
| 2558670807 | DRAFT_01475 | Coordinates    |              | 1338..2489(+)                                               |          |
| 2558670807 | DRAFT_01475 | DNA_length     |              | 1152bp                                                      |          |
| 2558670807 | DRAFT_01475 | Protein_length |              | 383aa                                                       |          |
| 2558670807 | DRAFT_01475 | GC             |              |                                                             | 0.51     |
| 2558670807 | DRAFT_01475 | Transmembrane  |              | Yes                                                         |          |
| 2558670808 | DRAFT_01476 | Locus_type     |              | CDS                                                         |          |
| 2558670808 | DRAFT_01476 | Product_name   |              | hypothetical protein                                        |          |
| 2558670808 | DRAFT_01476 | Scaffold       |              | DRAFT_contig_70_424_len_12921_read_count_259234.37          |          |
| 2558670808 | DRAFT_01476 | Coordinates    |              | 2513..3040(-)                                               |          |
| 2558670808 | DRAFT_01476 | DNA_length     |              | 528bp                                                       |          |
| 2558670808 | DRAFT_01476 | Protein_length |              | 175aa                                                       |          |
| 2558670808 | DRAFT_01476 | GC             |              |                                                             | 0.54     |
| 2558670808 | DRAFT_01476 | Transmembrane  |              | Yes                                                         |          |
| 2558670809 | DRAFT_01477 | Locus_type     |              | CDS                                                         |          |
| 2558670809 | DRAFT_01477 | Product_name   |              | hypothetical protein                                        |          |
| 2558670809 | DRAFT_01477 | Scaffold       |              | DRAFT_contig_70_424_len_12921_read_count_259234.37          |          |
| 2558670809 | DRAFT_01477 | Coordinates    |              | 3129..3632(+)                                               |          |
| 2558670809 | DRAFT_01477 | DNA_length     |              | 504bp                                                       |          |
| 2558670809 | DRAFT_01477 | Protein_length |              | 167aa                                                       |          |
| 2558670809 | DRAFT_01477 | GC             |              |                                                             | 0.54     |
| 2558670809 | DRAFT_01477 | Transmembrane  |              | Yes                                                         |          |
| 2558670810 | DRAFT_01478 | pfam04307      | DUF457       |                                                             | 5.60E-14 |
| 2558670810 | DRAFT_01478 | Locus_type     |              | CDS                                                         |          |
| 2558670810 | DRAFT_01478 | Product_name   |              | Predicted membrane-bound metal-dependent hydrolase (DUF457) |          |
| 2558670810 | DRAFT_01478 | Scaffold       |              | DRAFT_contig_70_424_len_12921_read_count_259234.37          |          |
| 2558670810 | DRAFT_01478 | Coordinates    |              | 4064..4993(+)                                               |          |

|            |             |                |                                                    |      |
|------------|-------------|----------------|----------------------------------------------------|------|
| 2558670810 | DRAFT_01478 | DNA_length     | 930bp                                              |      |
| 2558670810 | DRAFT_01478 | Protein_length | 309aa                                              |      |
| 2558670810 | DRAFT_01478 | GC             |                                                    | 0.52 |
| 2558670810 | DRAFT_01478 | Transmembrane  | Yes                                                |      |
| 2558670811 | DRAFT_01479 | Locus_type     | CDS                                                |      |
| 2558670811 | DRAFT_01479 | Product_name   | hypothetical protein                               |      |
| 2558670811 | DRAFT_01479 | Scaffold       | DRAFT_contig_70_424_len_12921_read_count_259234.37 |      |
| 2558670811 | DRAFT_01479 | Coordinates    | 5277..5402(+)                                      |      |
| 2558670811 | DRAFT_01479 | DNA_length     | 126bp                                              |      |
| 2558670811 | DRAFT_01479 | Protein_length | 41aa                                               |      |
| 2558670811 | DRAFT_01479 | GC             |                                                    | 0.56 |
| 2558670811 | DRAFT_01479 | Transmembrane  | Yes                                                |      |
| 2558670812 | DRAFT_01480 | Locus_type     | CDS                                                |      |
| 2558670812 | DRAFT_01480 | Product_name   | hypothetical protein                               |      |
| 2558670812 | DRAFT_01480 | Scaffold       | DRAFT_contig_70_424_len_12921_read_count_259234.37 |      |
| 2558670812 | DRAFT_01480 | Coordinates    | 5399..6523(-)                                      |      |
| 2558670812 | DRAFT_01480 | DNA_length     | 1125bp                                             |      |
| 2558670812 | DRAFT_01480 | Protein_length | 374aa                                              |      |
| 2558670812 | DRAFT_01480 | GC             |                                                    | 0.53 |
| 2558670813 | DRAFT_01481 | Locus_type     | CDS                                                |      |
| 2558670813 | DRAFT_01481 | Product_name   | hypothetical protein                               |      |
| 2558670813 | DRAFT_01481 | Scaffold       | DRAFT_contig_70_424_len_12921_read_count_259234.37 |      |
| 2558670813 | DRAFT_01481 | Coordinates    | 6726..8141(+)                                      |      |
| 2558670813 | DRAFT_01481 | DNA_length     | 1416bp                                             |      |
| 2558670813 | DRAFT_01481 | Protein_length | 471aa                                              |      |
| 2558670813 | DRAFT_01481 | GC             |                                                    | 0.51 |
| 2558670813 | DRAFT_01481 | Transmembrane  | Yes                                                |      |
| 2558670814 | DRAFT_01482 | Locus_type     | CDS                                                |      |
| 2558670814 | DRAFT_01482 | Product_name   | hypothetical protein                               |      |
| 2558670814 | DRAFT_01482 | Scaffold       | DRAFT_contig_70_424_len_12921_read_count_259234.37 |      |

|            |             |                |                                                    |          |
|------------|-------------|----------------|----------------------------------------------------|----------|
| 2558670814 | DRAFT_01482 | Coordinates    | 8600..9202(+)                                      |          |
| 2558670814 | DRAFT_01482 | DNA_length     | 603bp                                              |          |
| 2558670814 | DRAFT_01482 | Protein_length | 200aa                                              |          |
| 2558670814 | DRAFT_01482 | GC             |                                                    | 0.49     |
| 2558670814 | DRAFT_01482 | Transmembrane  | Yes                                                |          |
| 2558670815 | DRAFT_01483 | COG_category   | [R] General function prediction only               |          |
| 2558670815 | DRAFT_01483 | COG0456        | Acetyltransferases                                 | 9.00E-08 |
| 2558670815 | DRAFT_01483 | pfam00583      | Acetyltransf_1                                     | 5.90E-15 |
| 2558670815 | DRAFT_01483 | pfam13673      | Acetyltransf_10                                    | 7.00E-09 |
| 2558670815 | DRAFT_01483 | Locus_type     | CDS                                                |          |
| 2558670815 | DRAFT_01483 | Product_name   | Acetyltransferases                                 |          |
| 2558670815 | DRAFT_01483 | Scaffold       | DRAFT_contig_70_424_len_12921_read_count_259234.37 |          |
| 2558670815 | DRAFT_01483 | Coordinates    | 9278..10243(-)                                     |          |
| 2558670815 | DRAFT_01483 | DNA_length     | 966bp                                              |          |
| 2558670815 | DRAFT_01483 | Protein_length | 321aa                                              |          |
| 2558670815 | DRAFT_01483 | GC             |                                                    | 0.5      |
| 2558670816 | DRAFT_01484 | pfam05977      | MFS_3                                              | 9.70E-21 |
| 2558670816 | DRAFT_01484 | Locus_type     | CDS                                                |          |
| 2558670816 | DRAFT_01484 | Product_name   | Transmembrane secretion effector                   |          |
| 2558670816 | DRAFT_01484 | Scaffold       | DRAFT_contig_70_424_len_12921_read_count_259234.37 |          |
| 2558670816 | DRAFT_01484 | Coordinates    | 10364..11605(-)                                    |          |
| 2558670816 | DRAFT_01484 | DNA_length     | 1242bp                                             |          |
| 2558670816 | DRAFT_01484 | Protein_length | 413aa                                              |          |
| 2558670816 | DRAFT_01484 | GC             |                                                    | 0.57     |
| 2558670816 | DRAFT_01484 | Transmembrane  | Yes                                                |          |
| 2558670817 | DRAFT_01485 | Locus_type     | CDS                                                |          |
| 2558670817 | DRAFT_01485 | Product_name   | hypothetical protein                               |          |
| 2558670817 | DRAFT_01485 | Scaffold       | DRAFT_contig_70_424_len_12921_read_count_259234.37 |          |
| 2558670817 | DRAFT_01485 | Coordinates    | 11936..12487(+)                                    |          |
| 2558670817 | DRAFT_01485 | DNA_length     | 552bp                                              |          |
| 2558670817 | DRAFT_01485 | Protein_length | 183aa                                              |          |

|            |             |                |                                                    |          |
|------------|-------------|----------------|----------------------------------------------------|----------|
| 2558670817 | DRAFT_01485 | GC             |                                                    | 0.51     |
| 2558670818 | DRAFT_01486 | pfam00766      | ETF_alpha                                          | 8.60E-15 |
| 2558670818 | DRAFT_01486 | Locus_type     | CDS                                                |          |
| 2558670818 | DRAFT_01486 | Product_name   | Electron transfer flavoprotein, alpha subunit      |          |
| 2558670818 | DRAFT_01486 | Scaffold       | DRAFT_contig_70_444_len_12584_read_count_230646.38 |          |
| 2558670818 | DRAFT_01486 | Coordinates    | 3..338(+)                                          |          |
| 2558670818 | DRAFT_01486 | DNA_length     | 336bp                                              |          |
| 2558670818 | DRAFT_01486 | Protein_length | 111aa                                              |          |
| 2558670818 | DRAFT_01486 | GC             |                                                    | 0.64     |
| 2558670819 | DRAFT_01487 | COG_category   | [C] Energy production and conversion               |          |
| 2558670819 | DRAFT_01487 | COG2086        | Electron transfer flavoprotein, beta subunit       | 3.00E-53 |
| 2558670819 | DRAFT_01487 | pfam01012      | ETF                                                | 3.00E-41 |
| 2558670819 | DRAFT_01487 | KO:K03521      | electron transfer flavoprotein beta subunit        | 0.00E+00 |
| 2558670819 | DRAFT_01487 | ITRM:01639     | electron transfer flavoprotein beta subunit        |          |
| 2558670819 | DRAFT_01487 | Locus_type     | CDS                                                |          |
| 2558670819 | DRAFT_01487 | Product_name   | electron transfer flavoprotein beta subunit        |          |
| 2558670819 | DRAFT_01487 | Scaffold       | DRAFT_contig_70_444_len_12584_read_count_230646.38 |          |
| 2558670819 | DRAFT_01487 | Coordinates    | 335..1120(+)                                       |          |
| 2558670819 | DRAFT_01487 | DNA_length     | 786bp                                              |          |
| 2558670819 | DRAFT_01487 | Protein_length | 261aa                                              |          |
| 2558670819 | DRAFT_01487 | GC             |                                                    | 0.62     |
| 2558670820 | DRAFT_01488 | Locus_type     | CDS                                                |          |
| 2558670820 | DRAFT_01488 | Product_name   | hypothetical protein                               |          |
| 2558670820 | DRAFT_01488 | Scaffold       | DRAFT_contig_70_444_len_12584_read_count_230646.38 |          |
| 2558670820 | DRAFT_01488 | Coordinates    | 1221..2273(+)                                      |          |
| 2558670820 | DRAFT_01488 | DNA_length     | 1053bp                                             |          |
| 2558670820 | DRAFT_01488 | Protein_length | 350aa                                              |          |
| 2558670820 | DRAFT_01488 | GC             |                                                    | 0.6      |
| 2558670821 | DRAFT_01489 | Locus_type     | CDS                                                |          |
| 2558670821 | DRAFT_01489 | Product_name   | hypothetical protein                               |          |



|            |             |                |                                                                                |          |
|------------|-------------|----------------|--------------------------------------------------------------------------------|----------|
| 2558670821 | DRAFT_01489 | Scaffold       | DRAFT_contig_70_444_len_12584_read_count_230646.38                             |          |
| 2558670821 | DRAFT_01489 | Coordinates    | 2529..2768(+)                                                                  |          |
| 2558670821 | DRAFT_01489 | DNA_length     | 240bp                                                                          |          |
| 2558670821 | DRAFT_01489 | Protein_length | 79aa                                                                           |          |
| 2558670821 | DRAFT_01489 | GC             |                                                                                | 0.62     |
| 2558670822 | DRAFT_01490 | COG_category   | [P] Inorganic ion transport and metabolism                                     |          |
| 2558670822 | DRAFT_01490 | COG0704        | Phosphate uptake regulator                                                     | 2.00E-13 |
| 2558670822 | DRAFT_01490 | pfam04014      | Antitoxin-MazE                                                                 | 1.60E-08 |
| 2558670822 | DRAFT_01490 | pfam01895      | PhoU                                                                           | 7.80E-07 |
| 2558670822 | DRAFT_01490 | Locus_type     | CDS                                                                            |          |
| 2558670822 | DRAFT_01490 | Product_name   | Phosphate uptake regulator                                                     |          |
| 2558670822 | DRAFT_01490 | Scaffold       | DRAFT_contig_70_444_len_12584_read_count_230646.38                             |          |
| 2558670822 | DRAFT_01490 | Coordinates    | 2782..3813(-)                                                                  |          |
| 2558670822 | DRAFT_01490 | DNA_length     | 1032bp                                                                         |          |
| 2558670822 | DRAFT_01490 | Protein_length | 343aa                                                                          |          |
| 2558670822 | DRAFT_01490 | GC             |                                                                                | 0.56     |
| 2558670823 | DRAFT_01491 | KEGG_module    | M00173: Reductive citric acid cycle (Arnon-Buchanan cycle)                     |          |
| 2558670823 | DRAFT_01491 | KEGG_module    | M00311: 2-oxoglutarate:ferredoxin oxidoreductase                               |          |
| 2558670823 | DRAFT_01491 | KEGG_module    | M00011: Citrate cycle, second carbon oxidation, 2-oxoglutarate => oxaloacetate |          |
| 2558670823 | DRAFT_01491 | Metacyc        | PWY-6969: TCA cycle V (2-oxoglutarate:ferredoxin oxidoreductase)               |          |
| 2558670823 | DRAFT_01491 | Metacyc        | P42-PWY: incomplete reductive TCA cycle                                        |          |
| 2558670823 | DRAFT_01491 | Metacyc        | P23-PWY: reductive TCA cycle I                                                 |          |
| 2558670823 | DRAFT_01491 | Metacyc        | REDCITCYC: TCA cycle III (helicobacter)                                        |          |
| 2558670823 | DRAFT_01491 | Metacyc        | PWY-5392: reductive TCA cycle II                                               |          |
| 2558670823 | DRAFT_01491 | COG_category   | [C] Energy production and conversion                                           |          |
| 2558670823 | DRAFT_01491 | COG0674        | Pyruvate:ferredoxin oxidoreductase and related 2-oxoacid:ferredoxin c          | 5.00E-71 |
| 2558670823 | DRAFT_01491 | pfam01855      | POR_N                                                                          | 1.10E-55 |
| 2558670823 | DRAFT_01491 | pfam02780      | Transketolase_C                                                                | 3.40E-08 |
| 2558670823 | DRAFT_01491 | pfam01558      | POR                                                                            | 2.80E-38 |
| 2558670823 | DRAFT_01491 | EC:1.2.7.3     | 2-oxoglutarate synthase.                                                       |          |
| 2558670823 | DRAFT_01491 | KO:K00174      | 2-oxoglutarate ferredoxin oxidoreductase subunit alpha [EC:1.2.7.3]            | 0.00E+00 |
| 2558670823 | DRAFT_01491 | Locus_type     | CDS                                                                            |          |

|            |             |                |                                                                                |           |
|------------|-------------|----------------|--------------------------------------------------------------------------------|-----------|
| 2558670823 | DRAFT_01491 | Product_name   | Pyruvate:ferredoxin oxidoreductase and related 2-oxoacid:ferredoxin            |           |
| 2558670823 | DRAFT_01491 | Scaffold       | DRAFT_contig_70_444_len_12584_read_count_230646.38                             |           |
| 2558670823 | DRAFT_01491 | Coordinates    | 3899..5878(+)                                                                  |           |
| 2558670823 | DRAFT_01491 | DNA_length     | 1980bp                                                                         |           |
| 2558670823 | DRAFT_01491 | Protein_length | 659aa                                                                          |           |
| 2558670823 | DRAFT_01491 | GC             |                                                                                | 0.59      |
| 2558670823 | DRAFT_01491 | Fused_gene     | Yes                                                                            |           |
| 2558670824 | DRAFT_01492 | KEGG_module    | M00311: 2-oxoglutarate:ferredoxin oxidoreductase                               |           |
| 2558670824 | DRAFT_01492 | KEGG_module    | M00011: Citrate cycle, second carbon oxidation, 2-oxoglutarate => oxaloacetate |           |
| 2558670824 | DRAFT_01492 | Metacyc        | PWY-5392: reductive TCA cycle II                                               |           |
| 2558670824 | DRAFT_01492 | Metacyc        | P42-PWY: incomplete reductive TCA cycle                                        |           |
| 2558670824 | DRAFT_01492 | Metacyc        | PWY-6969: TCA cycle V (2-oxoglutarate:ferredoxin oxidoreductase)               |           |
| 2558670824 | DRAFT_01492 | Metacyc        | REDCITCYC: TCA cycle III (helicobacter)                                        |           |
| 2558670824 | DRAFT_01492 | Metacyc        | P23-PWY: reductive TCA cycle I                                                 |           |
| 2558670824 | DRAFT_01492 | COG_category   | [C] Energy production and conversion                                           |           |
| 2558670824 | DRAFT_01492 | COG1013        | Pyruvate:ferredoxin oxidoreductase and related 2-oxoacid:ferredoxin c          | 8.00E-77  |
| 2558670824 | DRAFT_01492 | pfam02775      | TPP_enzyme_C                                                                   | 4.10E-29  |
| 2558670824 | DRAFT_01492 | pfam12367      | PFO_beta_C                                                                     | 2.30E-05  |
| 2558670824 | DRAFT_01492 | EC:1.2.7.3     | 2-oxoglutarate synthase.                                                       |           |
| 2558670824 | DRAFT_01492 | TIGR02177      | 2-oxoacid:acceptor oxidoreductase, beta subunit, pyruvate/2-ketoiso            | 8.20E-130 |
| 2558670824 | DRAFT_01492 | KO:K00175      | 2-oxoglutarate ferredoxin oxidoreductase subunit beta [EC:1.2.7.3]             | 0.00E+00  |
| 2558670824 | DRAFT_01492 | Locus_type     | CDS                                                                            |           |
| 2558670824 | DRAFT_01492 | Product_name   | 2-oxoacid:acceptor oxidoreductase, beta subunit, pyruvate/2-ketoiso            |           |
| 2558670824 | DRAFT_01492 | Scaffold       | DRAFT_contig_70_444_len_12584_read_count_230646.38                             |           |
| 2558670824 | DRAFT_01492 | Coordinates    | 5868..6833(+)                                                                  |           |
| 2558670824 | DRAFT_01492 | DNA_length     | 966bp                                                                          |           |
| 2558670824 | DRAFT_01492 | Protein_length | 321aa                                                                          |           |
| 2558670824 | DRAFT_01492 | GC             |                                                                                | 0.61      |
| 2558670825 | DRAFT_01493 | Locus_type     | rRNA                                                                           |           |
| 2558670825 | DRAFT_01493 | Gene_symbol    | 16S                                                                            |           |
| 2558670825 | DRAFT_01493 | Product_name   | 16S rRNA. Archaeal SSU                                                         |           |
| 2558670825 | DRAFT_01493 | Scaffold       | DRAFT_contig_70_444_len_12584_read_count_230646.38                             |           |

|            |             |                |                                                    |          |
|------------|-------------|----------------|----------------------------------------------------|----------|
| 2558670825 | DRAFT_01493 | Coordinates    | 7258..8612(+)                                      |          |
| 2558670825 | DRAFT_01493 | DNA_length     | 1355bp                                             |          |
| 2558670825 | DRAFT_01493 | GC             |                                                    | 0.58     |
|            |             |                |                                                    |          |
| 2558670826 | DRAFT_01494 | Locus_type     | CDS                                                |          |
| 2558670826 | DRAFT_01494 | Product_name   | hypothetical protein                               |          |
| 2558670826 | DRAFT_01494 | Scaffold       | DRAFT_contig_70_444_len_12584_read_count_230646.38 |          |
| 2558670826 | DRAFT_01494 | Coordinates    | 8769..8969(-)                                      |          |
| 2558670826 | DRAFT_01494 | DNA_length     | 201bp                                              |          |
| 2558670826 | DRAFT_01494 | Protein_length | 66aa                                               |          |
| 2558670826 | DRAFT_01494 | GC             |                                                    | 0.56     |
|            |             |                |                                                    |          |
| 2558670827 | DRAFT_01495 | Locus_type     | rRNA                                               |          |
| 2558670827 | DRAFT_01495 | Gene_symbol    | 23S                                                |          |
| 2558670827 | DRAFT_01495 | Product_name   | 23S rRNA. Archaeal LSU                             |          |
| 2558670827 | DRAFT_01495 | Scaffold       | DRAFT_contig_70_444_len_12584_read_count_230646.38 |          |
| 2558670827 | DRAFT_01495 | Coordinates    | 8970..12544(+)                                     |          |
| 2558670827 | DRAFT_01495 | DNA_length     | 3060bp                                             |          |
| 2558670827 | DRAFT_01495 | GC             |                                                    | 0.57     |
|            |             |                |                                                    |          |
| 2558670828 | DRAFT_01496 | COG_category   | [S] Function unknown                               |          |
| 2558670828 | DRAFT_01496 | COG5616        | Predicted integral membrane protein                | 4.00E-34 |
| 2558670828 | DRAFT_01496 | pfam13414      | TPR_11                                             | 2.30E-07 |
| 2558670828 | DRAFT_01496 | pfam13414      | TPR_11                                             | 3.00E-09 |
| 2558670828 | DRAFT_01496 | pfam13414      | TPR_11                                             | 8.50E-07 |
| 2558670828 | DRAFT_01496 | Locus_type     | CDS                                                |          |
| 2558670828 | DRAFT_01496 | Product_name   | Predicted integral membrane protein                |          |
| 2558670828 | DRAFT_01496 | Scaffold       | DRAFT_contig_70_456_len_12330_read_count_203941.39 |          |
| 2558670828 | DRAFT_01496 | Coordinates    | 1..1587(+)                                         |          |
| 2558670828 | DRAFT_01496 | DNA_length     | 1587bp                                             |          |
| 2558670828 | DRAFT_01496 | Protein_length | 528aa                                              |          |
| 2558670828 | DRAFT_01496 | GC             |                                                    | 0.57     |
|            |             |                |                                                    |          |
| 2558670829 | DRAFT_01497 | Locus_type     | CDS                                                |          |

|            |             |                |                                                    |           |
|------------|-------------|----------------|----------------------------------------------------|-----------|
| 2558670829 | DRAFT_01497 | Product_name   | hypothetical protein                               |           |
| 2558670829 | DRAFT_01497 | Scaffold       | DRAFT_contig_70_456_len_12330_read_count_203941.39 |           |
| 2558670829 | DRAFT_01497 | Coordinates    | 1913..2230(-)                                      |           |
| 2558670829 | DRAFT_01497 | DNA_length     | 318bp                                              |           |
| 2558670829 | DRAFT_01497 | Protein_length | 105aa                                              |           |
| 2558670829 | DRAFT_01497 | GC             |                                                    | 0.49      |
|            |             |                |                                                    |           |
| 2558670830 | DRAFT_01498 | COG_category   | [E] Amino acid transport and metabolism            |           |
| 2558670830 | DRAFT_01498 | COG3579        | Aminopeptidase C                                   | 0.00E+00  |
| 2558670830 | DRAFT_01498 | pfam03051      | Peptidase_C1_2                                     | 0.00E+00  |
| 2558670830 | DRAFT_01498 | EC:3.4.22.40   | Bleomycin hydrolase.                               |           |
| 2558670830 | DRAFT_01498 | KO:K01372      | bleomycin hydrolase [EC:3.4.22.40]                 | 0.00E+00  |
| 2558670830 | DRAFT_01498 | Locus_type     | CDS                                                |           |
| 2558670830 | DRAFT_01498 | Product_name   | Aminopeptidase C                                   |           |
| 2558670830 | DRAFT_01498 | Scaffold       | DRAFT_contig_70_456_len_12330_read_count_203941.39 |           |
| 2558670830 | DRAFT_01498 | Coordinates    | 2350..3693(-)                                      |           |
| 2558670830 | DRAFT_01498 | DNA_length     | 1344bp                                             |           |
| 2558670830 | DRAFT_01498 | Protein_length | 447aa                                              |           |
| 2558670830 | DRAFT_01498 | GC             |                                                    | 0.49      |
|            |             |                |                                                    |           |
| 2558670831 | DRAFT_01499 | COG_category   | [G] Carbohydrate transport and metabolism          |           |
| 2558670831 | DRAFT_01499 | COG0383        | Alpha-mannosidase                                  | 4.00E-127 |
| 2558670831 | DRAFT_01499 | pfam01074      | Glyco_hydro_38                                     | 1.10E-74  |
| 2558670831 | DRAFT_01499 | pfam09261      | Alpha-mann_mid                                     | 1.70E-24  |
| 2558670831 | DRAFT_01499 | pfam07748      | Glyco_hydro_38C                                    | 2.10E-74  |
| 2558670831 | DRAFT_01499 | EC:3.2.1.24    | Alpha-mannosidase.                                 |           |
| 2558670831 | DRAFT_01499 | KO:K01191      | alpha-mannosidase [EC:3.2.1.24]                    | 0.00E+00  |
| 2558670831 | DRAFT_01499 | Locus_type     | CDS                                                |           |
| 2558670831 | DRAFT_01499 | Product_name   | Alpha-mannosidase                                  |           |
| 2558670831 | DRAFT_01499 | Scaffold       | DRAFT_contig_70_456_len_12330_read_count_203941.39 |           |
| 2558670831 | DRAFT_01499 | Coordinates    | 4087..6765(+)                                      |           |
| 2558670831 | DRAFT_01499 | DNA_length     | 2679bp                                             |           |
| 2558670831 | DRAFT_01499 | Protein_length | 892aa                                              |           |
| 2558670831 | DRAFT_01499 | GC             |                                                    | 0.58      |

|            |             |                |                                                    |          |
|------------|-------------|----------------|----------------------------------------------------|----------|
| 2558670832 | DRAFT_01500 | Locus_type     | CDS                                                |          |
| 2558670832 | DRAFT_01500 | Product_name   | hypothetical protein                               |          |
| 2558670832 | DRAFT_01500 | Scaffold       | DRAFT_contig_70_456_len_12330_read_count_203941.39 |          |
| 2558670832 | DRAFT_01500 | Coordinates    | 6762..6938(+)                                      |          |
| 2558670832 | DRAFT_01500 | DNA_length     | 177bp                                              |          |
| 2558670832 | DRAFT_01500 | Protein_length | 58aa                                               |          |
| 2558670832 | DRAFT_01500 | GC             |                                                    | 0.58     |
| 2558670833 | DRAFT_01501 | COG_category   | [G] Carbohydrate transport and metabolism          |          |
| 2558670833 | DRAFT_01501 | COG2814        | Arabinose efflux permease                          | 4.00E-05 |
| 2558670833 | DRAFT_01501 | pfam07690      | MFS_1                                              | 2.30E-16 |
| 2558670833 | DRAFT_01501 | pfam07690      | MFS_1                                              | 3.20E-13 |
| 2558670833 | DRAFT_01501 | Locus_type     | CDS                                                |          |
| 2558670833 | DRAFT_01501 | Product_name   | Arabinose efflux permease                          |          |
| 2558670833 | DRAFT_01501 | Scaffold       | DRAFT_contig_70_456_len_12330_read_count_203941.39 |          |
| 2558670833 | DRAFT_01501 | Coordinates    | 7150..8520(-)                                      |          |
| 2558670833 | DRAFT_01501 | DNA_length     | 1371bp                                             |          |
| 2558670833 | DRAFT_01501 | Protein_length | 456aa                                              |          |
| 2558670833 | DRAFT_01501 | GC             |                                                    | 0.62     |
| 2558670833 | DRAFT_01501 | Transmembrane  | Yes                                                |          |
| 2558670834 | DRAFT_01502 | COG_category   | [G] Carbohydrate transport and metabolism          |          |
| 2558670834 | DRAFT_01502 | COG2814        | Arabinose efflux permease                          | 2.00E-05 |
| 2558670834 | DRAFT_01502 | pfam05977      | MFS_3                                              | 2.00E-32 |
| 2558670834 | DRAFT_01502 | Locus_type     | CDS                                                |          |
| 2558670834 | DRAFT_01502 | Product_name   | Arabinose efflux permease                          |          |
| 2558670834 | DRAFT_01502 | Scaffold       | DRAFT_contig_70_456_len_12330_read_count_203941.39 |          |
| 2558670834 | DRAFT_01502 | Coordinates    | 8943..10217(-)                                     |          |
| 2558670834 | DRAFT_01502 | DNA_length     | 1275bp                                             |          |
| 2558670834 | DRAFT_01502 | Protein_length | 424aa                                              |          |
| 2558670834 | DRAFT_01502 | GC             |                                                    | 0.55     |
| 2558670834 | DRAFT_01502 | Transmembrane  | Yes                                                |          |

|            |             |                |                                                    |          |
|------------|-------------|----------------|----------------------------------------------------|----------|
| 2558670835 | DRAFT_01503 | pfam01037      | AsnC_trans_reg                                     | 5.20E-08 |
| 2558670835 | DRAFT_01503 | Locus_type     | CDS                                                |          |
| 2558670835 | DRAFT_01503 | Product_name   | Transcriptional regulators                         |          |
| 2558670835 | DRAFT_01503 | Scaffold       | DRAFT_contig_70_456_len_12330_read_count_203941.39 |          |
| 2558670835 | DRAFT_01503 | Coordinates    | 10735..11094(-)                                    |          |
| 2558670835 | DRAFT_01503 | DNA_length     | 360bp                                              |          |
| 2558670835 | DRAFT_01503 | Protein_length | 119aa                                              |          |
| 2558670835 | DRAFT_01503 | GC             |                                                    | 0.53     |
|            |             |                |                                                    |          |
| 2558670836 | DRAFT_01504 | pfam01037      | AsnC_trans_reg                                     | 6.40E-12 |
| 2558670836 | DRAFT_01504 | Locus_type     | CDS                                                |          |
| 2558670836 | DRAFT_01504 | Product_name   | Transcriptional regulators                         |          |
| 2558670836 | DRAFT_01504 | Scaffold       | DRAFT_contig_70_456_len_12330_read_count_203941.39 |          |
| 2558670836 | DRAFT_01504 | Coordinates    | 11101..11349(-)                                    |          |
| 2558670836 | DRAFT_01504 | DNA_length     | 249bp                                              |          |
| 2558670836 | DRAFT_01504 | Protein_length | 82aa                                               |          |
| 2558670836 | DRAFT_01504 | GC             |                                                    | 0.53     |
|            |             |                |                                                    |          |
| 2558670837 | DRAFT_01505 | COG_category   | [R] General function prediction only               |          |
| 2558670837 | DRAFT_01505 | COG0121        | Predicted glutamine amidotransferase               | 4.00E-19 |
| 2558670837 | DRAFT_01505 | pfam13522      | GATase_6                                           | 1.60E-08 |
| 2558670837 | DRAFT_01505 | KO:K07008      | glutamine amidotransferase                         | 1.10E-42 |
| 2558670837 | DRAFT_01505 | Locus_type     | CDS                                                |          |
| 2558670837 | DRAFT_01505 | Product_name   | Predicted glutamine amidotransferase               |          |
| 2558670837 | DRAFT_01505 | Scaffold       | DRAFT_contig_70_456_len_12330_read_count_203941.39 |          |
| 2558670837 | DRAFT_01505 | Coordinates    | 11412..12140(-)                                    |          |
| 2558670837 | DRAFT_01505 | DNA_length     | 729bp                                              |          |
| 2558670837 | DRAFT_01505 | Protein_length | 242aa                                              |          |
| 2558670837 | DRAFT_01505 | GC             |                                                    | 0.54     |
|            |             |                |                                                    |          |
| 2558670838 | DRAFT_01506 | pfam04434      | SWIM                                               | 7.30E-08 |
| 2558670838 | DRAFT_01506 | Locus_type     | CDS                                                |          |
| 2558670838 | DRAFT_01506 | Product_name   | SWIM zinc finger                                   |          |
| 2558670838 | DRAFT_01506 | Scaffold       | DRAFT_contig_70_462_len_12209_read_count_202887.40 |          |

|            |             |                |                 |                                                           |          |
|------------|-------------|----------------|-----------------|-----------------------------------------------------------|----------|
| 2558670838 | DRAFT_01506 | Coordinates    |                 | 2..316(-)                                                 |          |
| 2558670838 | DRAFT_01506 | DNA_length     |                 | 315bp                                                     |          |
| 2558670838 | DRAFT_01506 | Protein_length |                 | 105aa                                                     |          |
| 2558670838 | DRAFT_01506 | GC             |                 |                                                           | 0.53     |
| 2558670839 | DRAFT_01507 | Locus_type     |                 | CDS                                                       |          |
| 2558670839 | DRAFT_01507 | Product_name   |                 | hypothetical protein                                      |          |
| 2558670839 | DRAFT_01507 | Scaffold       |                 | DRAFT_contig_70_462_len_12209_read_count_202887.40        |          |
| 2558670839 | DRAFT_01507 | Coordinates    |                 | 434..577(+)                                               |          |
| 2558670839 | DRAFT_01507 | DNA_length     |                 | 144bp                                                     |          |
| 2558670839 | DRAFT_01507 | Protein_length |                 | 47aa                                                      |          |
| 2558670839 | DRAFT_01507 | GC             |                 |                                                           | 0.53     |
| 2558670840 | DRAFT_01508 | Locus_type     |                 | CDS                                                       |          |
| 2558670840 | DRAFT_01508 | Product_name   |                 | hypothetical protein                                      |          |
| 2558670840 | DRAFT_01508 | Scaffold       |                 | DRAFT_contig_70_462_len_12209_read_count_202887.40        |          |
| 2558670840 | DRAFT_01508 | Coordinates    |                 | 579..1118(-)                                              |          |
| 2558670840 | DRAFT_01508 | DNA_length     |                 | 540bp                                                     |          |
| 2558670840 | DRAFT_01508 | Protein_length |                 | 179aa                                                     |          |
| 2558670840 | DRAFT_01508 | GC             |                 |                                                           | 0.5      |
| 2558670840 | DRAFT_01508 | Transmembrane  |                 | Yes                                                       |          |
| 2558670841 | DRAFT_01509 | Locus_type     |                 | CDS                                                       |          |
| 2558670841 | DRAFT_01509 | Product_name   |                 | hypothetical protein                                      |          |
| 2558670841 | DRAFT_01509 | Scaffold       |                 | DRAFT_contig_70_462_len_12209_read_count_202887.40        |          |
| 2558670841 | DRAFT_01509 | Coordinates    |                 | 1265..1918(-)                                             |          |
| 2558670841 | DRAFT_01509 | DNA_length     |                 | 654bp                                                     |          |
| 2558670841 | DRAFT_01509 | Protein_length |                 | 217aa                                                     |          |
| 2558670841 | DRAFT_01509 | GC             |                 |                                                           | 0.54     |
| 2558670841 | DRAFT_01509 | Transmembrane  |                 | Yes                                                       |          |
| 2558670842 | DRAFT_01510 | pfam13847      | Methyltransf_31 |                                                           | 5.80E-08 |
| 2558670842 | DRAFT_01510 | Locus_type     |                 | CDS                                                       |          |
| 2558670842 | DRAFT_01510 | Product_name   |                 | Methylase involved in ubiquinone/menaquinone biosynthesis |          |

|            |             |                |                                                   |                                                    |          |
|------------|-------------|----------------|---------------------------------------------------|----------------------------------------------------|----------|
| 2558670842 | DRAFT_01510 | Scaffold       |                                                   | DRAFT_contig_70_462_len_12209_read_count_202887.40 |          |
| 2558670842 | DRAFT_01510 | Coordinates    |                                                   | 2046..2474(+)                                      |          |
| 2558670842 | DRAFT_01510 | DNA_length     |                                                   | 429bp                                              |          |
| 2558670842 | DRAFT_01510 | Protein_length |                                                   | 142aa                                              |          |
| 2558670842 | DRAFT_01510 | GC             |                                                   |                                                    | 0.54     |
|            |             |                |                                                   |                                                    |          |
| 2558670843 | DRAFT_01511 | Locus_type     |                                                   | tRNA                                               |          |
| 2558670843 | DRAFT_01511 | Product_name   |                                                   | tRNA_Gln_TTG                                       |          |
| 2558670843 | DRAFT_01511 | Scaffold       |                                                   | DRAFT_contig_70_462_len_12209_read_count_202887.40 |          |
| 2558670843 | DRAFT_01511 | Coordinates    |                                                   | 2557..2629(-)                                      |          |
| 2558670843 | DRAFT_01511 | DNA_length     |                                                   | 73bp                                               |          |
| 2558670843 | DRAFT_01511 | GC             |                                                   |                                                    | 0.64     |
|            |             |                |                                                   |                                                    |          |
| 2558670844 | DRAFT_01512 | COG_category   | [S] Function unknown                              |                                                    |          |
| 2558670844 | DRAFT_01512 | COG1817        | Uncharacterized protein conserved in archaea      |                                                    | 3.00E-48 |
| 2558670844 | DRAFT_01512 | pfam04007      | DUF354                                            |                                                    | 1.10E-38 |
| 2558670844 | DRAFT_01512 | KO:K09726      | hypothetical protein                              |                                                    | 0.00E+00 |
| 2558670844 | DRAFT_01512 | Locus_type     |                                                   | CDS                                                |          |
| 2558670844 | DRAFT_01512 | Product_name   |                                                   | Uncharacterized protein conserved in archaea       |          |
| 2558670844 | DRAFT_01512 | Scaffold       |                                                   | DRAFT_contig_70_462_len_12209_read_count_202887.40 |          |
| 2558670844 | DRAFT_01512 | Coordinates    |                                                   | 2659..3720(-)                                      |          |
| 2558670844 | DRAFT_01512 | DNA_length     |                                                   | 1062bp                                             |          |
| 2558670844 | DRAFT_01512 | Protein_length |                                                   | 353aa                                              |          |
| 2558670844 | DRAFT_01512 | GC             |                                                   |                                                    | 0.6      |
|            |             |                |                                                   |                                                    |          |
| 2558670845 | DRAFT_01513 | KEGG_module    | M00126: Tetrahydrofolate biosynthesis, GTP => THF |                                                    |          |
| 2558670845 | DRAFT_01513 | Metacyc        | PWY-6614: tetrahydrofolate biosynthesis           |                                                    |          |
| 2558670845 | DRAFT_01513 | Metacyc        | 1CMET2-PWY: formylTHF biosynthesis I              |                                                    |          |
| 2558670845 | DRAFT_01513 | Metacyc        | PWY-2161: folate polyglutamylation                |                                                    |          |
| 2558670845 | DRAFT_01513 | COG_category   | [H] Coenzyme transport and metabolism             |                                                    |          |
| 2558670845 | DRAFT_01513 | COG0285        | Folylpolyglutamate synthase                       |                                                    | 1.00E-90 |
| 2558670845 | DRAFT_01513 | pfam02875      | Mur_ligase_C                                      |                                                    | 8.10E-07 |
| 2558670845 | DRAFT_01513 | pfam08245      | Mur_ligase_M                                      |                                                    | 3.50E-15 |
| 2558670845 | DRAFT_01513 | EC:6.3.2.17    | Tetrahydrofolate synthase.                        |                                                    |          |



|            |             |                |                                                                            |          |
|------------|-------------|----------------|----------------------------------------------------------------------------|----------|
| 2558670845 | DRAFT_01513 | EC:6.3.2.12    | Dihydrofolate synthase.                                                    |          |
| 2558670845 | DRAFT_01513 | TIGR01499      | folylpolyglutamate synthase/dihydrofolate synthase                         | 2.80E-96 |
| 2558670845 | DRAFT_01513 | KO:K11754      | dihydrofolate synthase / folylpolyglutamate synthase [EC:6.3.2.12 6.3.2.12 | 0.00E+00 |
| 2558670845 | DRAFT_01513 | Locus_type     | CDS                                                                        |          |
| 2558670845 | DRAFT_01513 | Product_name   | folylpolyglutamate synthase/dihydrofolate synthase                         |          |
| 2558670845 | DRAFT_01513 | Scaffold       | DRAFT_contig_70_462_len_12209_read_count_202887.40                         |          |
| 2558670845 | DRAFT_01513 | Coordinates    | 4055..5407(+)                                                              |          |
| 2558670845 | DRAFT_01513 | DNA_length     | 1353bp                                                                     |          |
| 2558670845 | DRAFT_01513 | Protein_length | 450aa                                                                      |          |
| 2558670845 | DRAFT_01513 | GC             |                                                                            | 0.6      |
|            |             |                |                                                                            |          |
| 2558670846 | DRAFT_01514 | Locus_type     | CDS                                                                        |          |
| 2558670846 | DRAFT_01514 | Product_name   | hypothetical protein                                                       |          |
| 2558670846 | DRAFT_01514 | Scaffold       | DRAFT_contig_70_462_len_12209_read_count_202887.40                         |          |
| 2558670846 | DRAFT_01514 | Coordinates    | 5502..6632(+)                                                              |          |
| 2558670846 | DRAFT_01514 | DNA_length     | 1131bp                                                                     |          |
| 2558670846 | DRAFT_01514 | Protein_length | 376aa                                                                      |          |
| 2558670846 | DRAFT_01514 | GC             |                                                                            | 0.58     |
|            |             |                |                                                                            |          |
| 2558670847 | DRAFT_01515 | Locus_type     | CDS                                                                        |          |
| 2558670847 | DRAFT_01515 | Product_name   | hypothetical protein                                                       |          |
| 2558670847 | DRAFT_01515 | Scaffold       | DRAFT_contig_70_462_len_12209_read_count_202887.40                         |          |
| 2558670847 | DRAFT_01515 | Coordinates    | 6692..6955(+)                                                              |          |
| 2558670847 | DRAFT_01515 | DNA_length     | 264bp                                                                      |          |
| 2558670847 | DRAFT_01515 | Protein_length | 87aa                                                                       |          |
| 2558670847 | DRAFT_01515 | GC             |                                                                            | 0.49     |
| 2558670847 | DRAFT_01515 | Transmembrane  | Yes                                                                        |          |
|            |             |                |                                                                            |          |
| 2558670848 | DRAFT_01516 | COG_category   | [R] General function prediction only                                       |          |
| 2558670848 | DRAFT_01516 | COG0673        | Predicted dehydrogenases and related proteins                              | 8.00E-50 |
| 2558670848 | DRAFT_01516 | pfam01408      | GFO_IDH_MocA                                                               | 6.20E-28 |
| 2558670848 | DRAFT_01516 | pfam02894      | GFO_IDH_MocA_C                                                             | 1.10E-05 |
| 2558670848 | DRAFT_01516 | Locus_type     | CDS                                                                        |          |
| 2558670848 | DRAFT_01516 | Product_name   | Predicted dehydrogenases and related proteins                              |          |

|            |             |                |                                                                                      |                                                                     |          |
|------------|-------------|----------------|--------------------------------------------------------------------------------------|---------------------------------------------------------------------|----------|
| 2558670848 | DRAFT_01516 | Scaffold       |                                                                                      | DRAFT_contig_70_462_len_12209_read_count_202887.40                  |          |
| 2558670848 | DRAFT_01516 | Coordinates    |                                                                                      | 7081..8019(+)                                                       |          |
| 2558670848 | DRAFT_01516 | DNA_length     |                                                                                      | 939bp                                                               |          |
| 2558670848 | DRAFT_01516 | Protein_length |                                                                                      | 312aa                                                               |          |
| 2558670848 | DRAFT_01516 | GC             |                                                                                      |                                                                     | 0.58     |
| 2558670849 | DRAFT_01517 | pfam00132      | Hexapep                                                                              |                                                                     | 1.90E-05 |
| 2558670849 | DRAFT_01517 | pfam00132      | Hexapep                                                                              |                                                                     | 2.30E-08 |
| 2558670849 | DRAFT_01517 | pfam14602      | Hexapep_2                                                                            |                                                                     | 2.00E-09 |
| 2558670849 | DRAFT_01517 | Locus_type     |                                                                                      | CDS                                                                 |          |
| 2558670849 | DRAFT_01517 | Product_name   |                                                                                      | N-acetylglucosamine-1-phosphate uridyltransferase (contains nucleot |          |
| 2558670849 | DRAFT_01517 | Scaffold       |                                                                                      | DRAFT_contig_70_462_len_12209_read_count_202887.40                  |          |
| 2558670849 | DRAFT_01517 | Coordinates    |                                                                                      | 8024..8509(+)                                                       |          |
| 2558670849 | DRAFT_01517 | DNA_length     |                                                                                      | 486bp                                                               |          |
| 2558670849 | DRAFT_01517 | Protein_length |                                                                                      | 161aa                                                               |          |
| 2558670849 | DRAFT_01517 | GC             |                                                                                      |                                                                     | 0.57     |
| 2558670850 | DRAFT_01518 | Locus_type     |                                                                                      | CDS                                                                 |          |
| 2558670850 | DRAFT_01518 | Product_name   |                                                                                      | hypothetical protein                                                |          |
| 2558670850 | DRAFT_01518 | Scaffold       |                                                                                      | DRAFT_contig_70_462_len_12209_read_count_202887.40                  |          |
| 2558670850 | DRAFT_01518 | Coordinates    |                                                                                      | 8478..8732(-)                                                       |          |
| 2558670850 | DRAFT_01518 | DNA_length     |                                                                                      | 255bp                                                               |          |
| 2558670850 | DRAFT_01518 | Protein_length |                                                                                      | 84aa                                                                |          |
| 2558670850 | DRAFT_01518 | GC             |                                                                                      |                                                                     | 0.58     |
| 2558670850 | DRAFT_01518 | Transmembrane  |                                                                                      | Yes                                                                 |          |
| 2558670851 | DRAFT_01519 | KEGG_module    | M00055: N-glycan precursor biosynthesis                                              |                                                                     |          |
| 2558670851 | DRAFT_01519 | Metacyc        | MANNOSYL-CHITO-DOLICHOL-BIOSYNTHESIS: dolichyl-diphosphooligosaccharide biosynthesis |                                                                     |          |
| 2558670851 | DRAFT_01519 | COG_category   | [M] Cell wall/membrane/envelope biogenesis                                           |                                                                     |          |
| 2558670851 | DRAFT_01519 | COG0472        | UDP-N-acetylmuramyl pentapeptide phosphotransferase/UDP-N-acety                      | 7.00E-19                                                            |          |
| 2558670851 | DRAFT_01519 | pfam00953      | Glycos_transf_4                                                                      |                                                                     | 1.10E-24 |
| 2558670851 | DRAFT_01519 | EC:2.7.8.15    | UDP-N-acetylglucosamine--dolichyl-phosphate N-acetylglucosaminephosphotransferase.   |                                                                     |          |
| 2558670851 | DRAFT_01519 | KO:K01001      | UDP-N-acetylglucosamine--dolichyl-phosphate N-acetylglucosamineph                    | 0.00E+00                                                            |          |
| 2558670851 | DRAFT_01519 | Locus_type     |                                                                                      | CDS                                                                 |          |

|            |             |                |                                                                |          |
|------------|-------------|----------------|----------------------------------------------------------------|----------|
| 2558670851 | DRAFT_01519 | Product_name   | UDP-N-acetylmuramyl pentapeptide phosphotransferase/UDP-N-acet |          |
| 2558670851 | DRAFT_01519 | Scaffold       | DRAFT_contig_70_462_len_12209_read_count_202887.40             |          |
| 2558670851 | DRAFT_01519 | Coordinates    | 8734..9768(-)                                                  |          |
| 2558670851 | DRAFT_01519 | DNA_length     | 1035bp                                                         |          |
| 2558670851 | DRAFT_01519 | Protein_length | 344aa                                                          |          |
| 2558670851 | DRAFT_01519 | GC             |                                                                | 0.59     |
| 2558670851 | DRAFT_01519 | Transmembrane  | Yes                                                            |          |
| 2558670852 | DRAFT_01520 | KEGG_module    | M00288: RPA complex                                            |          |
| 2558670852 | DRAFT_01520 | pfam01336      | tRNA_anti-codon                                                | 4.80E-09 |
| 2558670852 | DRAFT_01520 | KO:K07466      | replication factor A1                                          | 3.00E-20 |
| 2558670852 | DRAFT_01520 | Locus_type     | CDS                                                            |          |
| 2558670852 | DRAFT_01520 | Product_name   | OB-fold nucleic acid binding domain                            |          |
| 2558670852 | DRAFT_01520 | Scaffold       | DRAFT_contig_70_462_len_12209_read_count_202887.40             |          |
| 2558670852 | DRAFT_01520 | Coordinates    | 9865..10158(+)                                                 |          |
| 2558670852 | DRAFT_01520 | DNA_length     | 294bp                                                          |          |
| 2558670852 | DRAFT_01520 | Protein_length | 97aa                                                           |          |
| 2558670852 | DRAFT_01520 | GC             |                                                                | 0.59     |
| 2558670853 | DRAFT_01521 | COG_category   | [T] Signal transduction mechanisms                             |          |
| 2558670853 | DRAFT_01521 | COG2453        | Predicted protein-tyrosine phosphatase                         | 1.00E-16 |
| 2558670853 | DRAFT_01521 | pfam00782      | DSPc                                                           | 4.70E-19 |
| 2558670853 | DRAFT_01521 | EC:3.1.3.16    | Phosphoprotein phosphatase.                                    |          |
| 2558670853 | DRAFT_01521 | EC:3.1.3.48    | Protein-tyrosine-phosphatase.                                  |          |
| 2558670853 | DRAFT_01521 | KO:K14165      | dual specificity phosphatase [EC:3.1.3.16 3.1.3.48]            | 2.60E-32 |
| 2558670853 | DRAFT_01521 | Locus_type     | CDS                                                            |          |
| 2558670853 | DRAFT_01521 | Product_name   | Predicted protein-tyrosine phosphatase                         |          |
| 2558670853 | DRAFT_01521 | Scaffold       | DRAFT_contig_70_462_len_12209_read_count_202887.40             |          |
| 2558670853 | DRAFT_01521 | Coordinates    | 10202..10699(+)                                                |          |
| 2558670853 | DRAFT_01521 | DNA_length     | 498bp                                                          |          |
| 2558670853 | DRAFT_01521 | Protein_length | 165aa                                                          |          |
| 2558670853 | DRAFT_01521 | GC             |                                                                | 0.6      |
| 2558670854 | DRAFT_01522 | COG_category   | [T] Signal transduction mechanisms                             |          |

|            |             |                |                                                                   |          |
|------------|-------------|----------------|-------------------------------------------------------------------|----------|
| 2558670854 | DRAFT_01522 | COG2114        | Adenylate cyclase, family 3 (some proteins contain HAMP domain)   | 3.00E-27 |
| 2558670854 | DRAFT_01522 | pfam00211      | Guanylate_cyc                                                     | 4.70E-26 |
| 2558670854 | DRAFT_01522 | Locus_type     | CDS                                                               |          |
| 2558670854 | DRAFT_01522 | Product_name   | Adenylate cyclase, family 3 (some proteins contain HAMP domain)   |          |
| 2558670854 | DRAFT_01522 | Scaffold       | DRAFT_contig_70_462_len_12209_read_count_202887.40                |          |
| 2558670854 | DRAFT_01522 | Coordinates    | 10850..11884(+)                                                   |          |
| 2558670854 | DRAFT_01522 | DNA_length     | 1035bp                                                            |          |
| 2558670854 | DRAFT_01522 | Protein_length | 344aa                                                             |          |
| 2558670854 | DRAFT_01522 | GC             |                                                                   | 0.53     |
| 2558670855 | DRAFT_01523 | Locus_type     | tRNA                                                              |          |
| 2558670855 | DRAFT_01523 | Product_name   | tRNA_Leu_GAG                                                      |          |
| 2558670855 | DRAFT_01523 | Scaffold       | DRAFT_contig_70_462_len_12209_read_count_202887.40                |          |
| 2558670855 | DRAFT_01523 | Coordinates    | 11944..12031(-)                                                   |          |
| 2558670855 | DRAFT_01523 | DNA_length     | 88bp                                                              |          |
| 2558670855 | DRAFT_01523 | GC             |                                                                   | 0.68     |
| 2558670856 | DRAFT_01524 | Locus_type     | tRNA                                                              |          |
| 2558670856 | DRAFT_01524 | Product_name   | tRNA_Gly_TCC                                                      |          |
| 2558670856 | DRAFT_01524 | Scaffold       | DRAFT_contig_70_462_len_12209_read_count_202887.40                |          |
| 2558670856 | DRAFT_01524 | Coordinates    | 12119..12208(+)                                                   |          |
| 2558670856 | DRAFT_01524 | DNA_length     | 74bp                                                              |          |
| 2558670856 | DRAFT_01524 | GC             |                                                                   | 0.69     |
| 2558670857 | DRAFT_01525 | pfam02771      | Acyl-CoA_dh_N                                                     | 8.10E-16 |
| 2558670857 | DRAFT_01525 | Locus_type     | CDS                                                               |          |
| 2558670857 | DRAFT_01525 | Product_name   | Acyl-CoA dehydrogenases                                           |          |
| 2558670857 | DRAFT_01525 | Scaffold       | DRAFT_contig_70_472_len_12013_read_count_183073.41                |          |
| 2558670857 | DRAFT_01525 | Coordinates    | 2..226(-)                                                         |          |
| 2558670857 | DRAFT_01525 | DNA_length     | 225bp                                                             |          |
| 2558670857 | DRAFT_01525 | Protein_length | 75aa                                                              |          |
| 2558670857 | DRAFT_01525 | GC             |                                                                   | 0.59     |
| 2558670858 | DRAFT_01526 | KEGG_module    | M00036: Leucine degradation, leucine => acetoacetate + acetyl-CoA |          |

|            |             |                |                                                                                        |          |
|------------|-------------|----------------|----------------------------------------------------------------------------------------|----------|
| 2558670858 | DRAFT_01526 | KEGG_module    | M00087: beta-Oxidation                                                                 |          |
| 2558670858 | DRAFT_01526 | KEGG_module    | M00013: Malonate semialdehyde pathway, propanoyl-CoA => Acetyl-CoA                     |          |
| 2558670858 | DRAFT_01526 | Metacyc        | PWY-7094: fatty acid salvage                                                           |          |
| 2558670858 | DRAFT_01526 | COG_category   | [I] Lipid transport and metabolism                                                     |          |
| 2558670858 | DRAFT_01526 | COG1960        | Acyl-CoA dehydrogenases                                                                | 5.00E-74 |
| 2558670858 | DRAFT_01526 | pfam00441      | Acyl-CoA_dh_1                                                                          | 8.20E-37 |
| 2558670858 | DRAFT_01526 | pfam02770      | Acyl-CoA_dh_M                                                                          | 1.10E-19 |
| 2558670858 | DRAFT_01526 | pfam02771      | Acyl-CoA_dh_N                                                                          | 3.80E-14 |
| 2558670858 | DRAFT_01526 | EC:1.3.8.7     | Medium-chain acyl-CoA dehydrogenase.                                                   |          |
| 2558670858 | DRAFT_01526 | KO:K00249      | acyl-CoA dehydrogenase [EC:1.3.8.7]                                                    | 0.00E+00 |
| 2558670858 | DRAFT_01526 | Locus_type     | CDS                                                                                    |          |
| 2558670858 | DRAFT_01526 | Product_name   | Acyl-CoA dehydrogenases                                                                |          |
| 2558670858 | DRAFT_01526 | Scaffold       | DRAFT_contig_70_472_len_12013_read_count_183073.41                                     |          |
| 2558670858 | DRAFT_01526 | Coordinates    | 231..1373(-)                                                                           |          |
| 2558670858 | DRAFT_01526 | DNA_length     | 1143bp                                                                                 |          |
| 2558670858 | DRAFT_01526 | Protein_length | 380aa                                                                                  |          |
| 2558670858 | DRAFT_01526 | GC             |                                                                                        | 0.58     |
| 2558670859 | DRAFT_01527 | KEGG_module    | M00375: Hydroxypropionate-hydroxybutylate cycle                                        |          |
| 2558670859 | DRAFT_01527 | KEGG_module    | M00373: Ethylmalonyl pathway                                                           |          |
| 2558670859 | DRAFT_01527 | KEGG_module    | M00374: Dicarboxylate-hydroxybutyrate cycle                                            |          |
| 2558670859 | DRAFT_01527 | KEGG_module    | M00088: Ketone body biosynthesis, acetyl-CoA => acetoacetate/3-hydroxybutyrate/acetone |          |
| 2558670859 | DRAFT_01527 | KEGG_module    | M00095: C5 isoprenoid biosynthesis, mevalonate pathway                                 |          |
| 2558670859 | DRAFT_01527 | Metacyc        | PWY-922: mevalonate pathway I                                                          |          |
| 2558670859 | DRAFT_01527 | Metacyc        | PWY1-3: polyhydroxybutyrate biosynthesis                                               |          |
| 2558670859 | DRAFT_01527 | Metacyc        | PWY-6583: pyruvate fermentation to butanol I                                           |          |
| 2558670859 | DRAFT_01527 | Metacyc        | CENTFERM-PWY: pyruvate fermentation to butanoate                                       |          |
| 2558670859 | DRAFT_01527 | Metacyc        | PWY66-368: ketolysis                                                                   |          |
| 2558670859 | DRAFT_01527 | Metacyc        | PWY66-367: ketogenesis                                                                 |          |
| 2558670859 | DRAFT_01527 | Metacyc        | PWY-7003: glycerol degradation to butanol                                              |          |
| 2558670859 | DRAFT_01527 | Metacyc        | ACETOACETATE-DEG-PWY: acetoacetate degradation (to acetyl CoA)                         |          |
| 2558670859 | DRAFT_01527 | Metacyc        | PWY-6174: mevalonate pathway II (archaea)                                              |          |
| 2558670859 | DRAFT_01527 | Metacyc        | PWY-5741: ethylmalonyl pathway                                                         |          |
| 2558670859 | DRAFT_01527 | Metacyc        | PWY-5177: glutaryl-CoA degradation                                                     |          |

|            |             |                |                                                                              |          |
|------------|-------------|----------------|------------------------------------------------------------------------------|----------|
| 2558670859 | DRAFT_01527 | Metacyc        | PWY-6876: isopropanol biosynthesis                                           |          |
| 2558670859 | DRAFT_01527 | Metacyc        | PWY-6588: pyruvate fermentation to acetone                                   |          |
| 2558670859 | DRAFT_01527 | Metacyc        | P163-PWY: lysine fermentation to acetate and butyrate                        |          |
| 2558670859 | DRAFT_01527 | Metacyc        | ILEUDEG-PWY: isoleucine degradation I                                        |          |
| 2558670859 | DRAFT_01527 | Metacyc        | PWY-5789: 3-hydroxypropionate/4-hydroxybutyrate cycle                        |          |
| 2558670859 | DRAFT_01527 | Metacyc        | PWY-5109: 2-methylbutyrate biosynthesis                                      |          |
| 2558670859 | DRAFT_01527 | Metacyc        | PWY-6883: pyruvate fermentation to butanol II                                |          |
| 2558670859 | DRAFT_01527 | Metacyc        | PWY-6863: pyruvate fermentation to hexanol                                   |          |
| 2558670859 | DRAFT_01527 | Metacyc        | PWY-5676: acetyl-CoA fermentation to butyrate II                             |          |
| 2558670859 | DRAFT_01527 | COG_category   | [I] Lipid transport and metabolism                                           |          |
| 2558670859 | DRAFT_01527 | COG0183        | Acetyl-CoA acetyltransferase                                                 | 1.00E-85 |
| 2558670859 | DRAFT_01527 | pfam02803      | Thiolase_C                                                                   | 4.30E-46 |
| 2558670859 | DRAFT_01527 | pfam00108      | Thiolase_N                                                                   | 2.60E-63 |
| 2558670859 | DRAFT_01527 | EC:2.3.1.9     | Acetyl-CoA C-acetyltransferase.                                              |          |
| 2558670859 | DRAFT_01527 | TIGR01930      | acetyl-CoA acetyltransferases                                                | 0.00E+00 |
| 2558670859 | DRAFT_01527 | KO:K00626      | acetyl-CoA C-acetyltransferase [EC:2.3.1.9]                                  | 0.00E+00 |
| 2558670859 | DRAFT_01527 | Locus_type     | CDS                                                                          |          |
| 2558670859 | DRAFT_01527 | Product_name   | acetyl-CoA acetyltransferases                                                |          |
| 2558670859 | DRAFT_01527 | Scaffold       | DRAFT_contig_70_472_len_12013_read_count_183073.41                           |          |
| 2558670859 | DRAFT_01527 | Coordinates    | 1465..2649(-)                                                                |          |
| 2558670859 | DRAFT_01527 | DNA_length     | 1185bp                                                                       |          |
| 2558670859 | DRAFT_01527 | Protein_length | 394aa                                                                        |          |
| 2558670859 | DRAFT_01527 | GC             |                                                                              | 0.6      |
| 2558670860 | DRAFT_01528 | KEGG_module    | M00374: Dicarboxylate-hydroxybutyrate cycle                                  |          |
| 2558670860 | DRAFT_01528 | KEGG_module    | M00375: Hydroxypropionate-hydroxybutylate cycle                              |          |
| 2558670860 | DRAFT_01528 | Metacyc        | PWY-7007: methyl ketone biosynthesis                                         |          |
| 2558670860 | DRAFT_01528 | Metacyc        | PWY-6948: sitosterol degradation to androstenedione                          |          |
| 2558670860 | DRAFT_01528 | Metacyc        | PWY-6945: cholesterol degradation to androstenedione I (cholesterol oxidase) |          |
| 2558670860 | DRAFT_01528 | Metacyc        | PWY-735: jasmonic acid biosynthesis                                          |          |
| 2558670860 | DRAFT_01528 | Metacyc        | PWY-6863: pyruvate fermentation to hexanol                                   |          |
| 2558670860 | DRAFT_01528 | Metacyc        | PWY-5676: acetyl-CoA fermentation to butyrate II                             |          |
| 2558670860 | DRAFT_01528 | Metacyc        | PWY-1361: benzoyl-CoA degradation I (aerobic)                                |          |
| 2558670860 | DRAFT_01528 | Metacyc        | PWY-7094: fatty acid salvage                                                 |          |

|            |             |              |                                                                                     |          |
|------------|-------------|--------------|-------------------------------------------------------------------------------------|----------|
| 2558670860 | DRAFT_01528 | Metacyc      | PWY-6883: pyruvate fermentation to butanol II                                       |          |
| 2558670860 | DRAFT_01528 | Metacyc      | CENTFERM-PWY: pyruvate fermentation to butanoate                                    |          |
| 2558670860 | DRAFT_01528 | Metacyc      | PWY0-321: phenylacetate degradation I (aerobic)                                     |          |
| 2558670860 | DRAFT_01528 | Metacyc      | PWY66-391: fatty acid &beta;-oxidation VI (peroxisome)                              |          |
| 2558670860 | DRAFT_01528 | Metacyc      | FAO-PWY: fatty acid &beta;-oxidation I                                              |          |
| 2558670860 | DRAFT_01528 | Metacyc      | PWY-6944: androstenedione degradation                                               |          |
| 2558670860 | DRAFT_01528 | Metacyc      | PWY-5136: fatty acid &beta;-oxidation II (peroxisome)                               |          |
| 2558670860 | DRAFT_01528 | Metacyc      | PWY-6946: cholesterol degradation to androstenedione II (cholesterol dehydrogenase) |          |
| 2558670860 | DRAFT_01528 | Metacyc      | PWY-5789: 3-hydroxypropionate/4-hydroxybutyrate cycle                               |          |
| 2558670860 | DRAFT_01528 | Metacyc      | PWY-5741: ethylmalonyl pathway                                                      |          |
| 2558670860 | DRAFT_01528 | Metacyc      | PWY-6583: pyruvate fermentation to butanol I                                        |          |
| 2558670860 | DRAFT_01528 | Metacyc      | PWY-6435: 4-hydroxybenzoate biosynthesis V                                          |          |
| 2558670860 | DRAFT_01528 | Metacyc      | PWY-5177: glutaryl-CoA degradation                                                  |          |
| 2558670860 | DRAFT_01528 | IMG_pathway  | 1014: Dicarboxylate/4-hydroxybutyrate cycle                                         |          |
| 2558670860 | DRAFT_01528 | IMG_pathway  | 222: L-isoleucine degradation to propionyl-CoA and acetyl-CoA                       |          |
| 2558670860 | DRAFT_01528 | IMG_pathway  | 369: Pyruvate conversion to butyrate                                                |          |
| 2558670860 | DRAFT_01528 | IMG_pathway  | 389: Crotonyl-CoA conversion to acetate                                             |          |
| 2558670860 | DRAFT_01528 | IMG_pathway  | 596: 3-hydroxypropionate/4-hydroxybutyrate cycle                                    |          |
| 2558670860 | DRAFT_01528 | IMG_pathway  | 962: Glyoxylate from acetyl-CoA via ethylmalonyl-CoA pathway                        |          |
| 2558670860 | DRAFT_01528 | COG_category | [I] Lipid transport and metabolism                                                  |          |
| 2558670860 | DRAFT_01528 | COG1250      | 3-hydroxyacyl-CoA dehydrogenase                                                     | 2.00E-79 |
| 2558670860 | DRAFT_01528 | pfam00725    | 3HCDH                                                                               | 2.80E-18 |
| 2558670860 | DRAFT_01528 | pfam00378    | ECH                                                                                 | 2.90E-55 |
| 2558670860 | DRAFT_01528 | pfam00725    | 3HCDH                                                                               | 2.20E-06 |
| 2558670860 | DRAFT_01528 | pfam02737    | 3HCDH_N                                                                             | 4.80E-64 |
| 2558670860 | DRAFT_01528 | EC:1.1.1.35  | 3-hydroxyacyl-CoA dehydrogenase.                                                    |          |
| 2558670860 | DRAFT_01528 | EC:4.2.1.55  | 3-hydroxybutyryl-CoA dehydratase.                                                   |          |
| 2558670860 | DRAFT_01528 | KO:K15016    | 3-hydroxybutyryl-CoA dehydratase / 3-hydroxyacyl-CoA dehydrogenase                  | 0.00E+00 |
| 2558670860 | DRAFT_01528 | ITERM:00577  | 3-hydroxyacyl-CoA dehydrogenase (EC 1.1.1.35)                                       |          |
| 2558670860 | DRAFT_01528 | ITERM:00611  | Enoyl-CoA hydratase (EC 4.2.1.17)                                                   |          |
| 2558670860 | DRAFT_01528 | Locus_type   | CDS                                                                                 |          |
| 2558670860 | DRAFT_01528 | Product_name | 3-hydroxyacyl-CoA dehydrogenase (EC 1.1.1.35)/Enoyl-CoA hydratase                   |          |
| 2558670860 | DRAFT_01528 | Scaffold     | DRAFT_contig_70_472_len_12013_read_count_183073.41                                  |          |
| 2558670860 | DRAFT_01528 | Coordinates  | 2671..4668(-)                                                                       |          |

|            |             |                |                                                                      |          |
|------------|-------------|----------------|----------------------------------------------------------------------|----------|
| 2558670860 | DRAFT_01528 | DNA_length     | 1998bp                                                               |          |
| 2558670860 | DRAFT_01528 | Protein_length | 665aa                                                                |          |
| 2558670860 | DRAFT_01528 | GC             |                                                                      | 0.6      |
| 2558670860 | DRAFT_01528 | Fused_gene     | Yes                                                                  |          |
| 2558670861 | DRAFT_01529 | Metacyc        | PWY-7027: hentriaconta-3,6,9,12,15,19,22,25,28-nonaene biosynthesis  |          |
| 2558670861 | DRAFT_01529 | Metacyc        | PWY-5996: oleate biosynthesis II (animals and fungi)                 |          |
| 2558670861 | DRAFT_01529 | Metacyc        | PWY-6039: chlorogenic acid biosynthesis I                            |          |
| 2558670861 | DRAFT_01529 | Metacyc        | PWY-7007: methyl ketone biosynthesis                                 |          |
| 2558670861 | DRAFT_01529 | Metacyc        | PWY-981: salicylate biosynthesis II                                  |          |
| 2558670861 | DRAFT_01529 | Metacyc        | PWY-6320: phaselate biosynthesis                                     |          |
| 2558670861 | DRAFT_01529 | Metacyc        | PWY-361: phenylpropanoid biosynthesis                                |          |
| 2558670861 | DRAFT_01529 | Metacyc        | PWY-6453: stigma estolide biosynthesis                               |          |
| 2558670861 | DRAFT_01529 | Metacyc        | PWY-6944: androstenedione degradation                                |          |
| 2558670861 | DRAFT_01529 | Metacyc        | PWY-6585: 2-tridecanone biosynthesis                                 |          |
| 2558670861 | DRAFT_01529 | Metacyc        | PWY-6673: caffeoylglucarate biosynthesis                             |          |
| 2558670861 | DRAFT_01529 | Metacyc        | PWY-7053: docosahexanoate biosynthesis I                             |          |
| 2558670861 | DRAFT_01529 | Metacyc        | PWY-6948: sitosterol degradation to androstenedione                  |          |
| 2558670861 | DRAFT_01529 | Metacyc        | PWY-6951: docosahexanoate biosynthesis II                            |          |
| 2558670861 | DRAFT_01529 | Metacyc        | PWY0-1337: oleate &beta;-oxidation                                   |          |
| 2558670861 | DRAFT_01529 | Metacyc        | PWY-6048: methylthiopropionate degradation I (cleavage)              |          |
| 2558670861 | DRAFT_01529 | COG_category   | [Q] Secondary metabolites biosynthesis, transport and catabolism     |          |
| 2558670861 | DRAFT_01529 | COG2050        | Uncharacterized protein, possibly involved in aromatic compounds cat | 1.00E-20 |
| 2558670861 | DRAFT_01529 | pfam03061      | 4HBT                                                                 | 5.10E-14 |
| 2558670861 | DRAFT_01529 | EC:3.1.2.-     | Hydrolases. Acting on ester bonds. Thiolester hydrolases.            |          |
| 2558670861 | DRAFT_01529 | TIGR00369      | uncharacterized domain 1                                             | 2.20E-24 |
| 2558670861 | DRAFT_01529 | KO:K02614      | acyl-CoA thioesterase [EC:3.1.2.-]                                   | 3.20E-32 |
| 2558670861 | DRAFT_01529 | Locus_type     | CDS                                                                  |          |
| 2558670861 | DRAFT_01529 | Product_name   | uncharacterized domain 1                                             |          |
| 2558670861 | DRAFT_01529 | Scaffold       | DRAFT_contig_70_472_len_12013_read_count_183073.41                   |          |
| 2558670861 | DRAFT_01529 | Coordinates    | 4787..5260(-)                                                        |          |
| 2558670861 | DRAFT_01529 | DNA_length     | 474bp                                                                |          |
| 2558670861 | DRAFT_01529 | Protein_length | 157aa                                                                |          |
| 2558670861 | DRAFT_01529 | GC             |                                                                      | 0.52     |



|            |             |                |                                                                      |          |
|------------|-------------|----------------|----------------------------------------------------------------------|----------|
| 2558670862 | DRAFT_01530 | pfam00571      | CBS                                                                  | 1.20E-15 |
| 2558670862 | DRAFT_01530 | pfam00571      | CBS                                                                  | 1.80E-07 |
| 2558670862 | DRAFT_01530 | Locus_type     | CDS                                                                  |          |
| 2558670862 | DRAFT_01530 | Product_name   | Predicted signal-transduction protein containing cAMP-binding and CI |          |
| 2558670862 | DRAFT_01530 | Scaffold       | DRAFT_contig_70_472_len_12013_read_count_183073.41                   |          |
| 2558670862 | DRAFT_01530 | Coordinates    | 5458..6027(+)                                                        |          |
| 2558670862 | DRAFT_01530 | DNA_length     | 570bp                                                                |          |
| 2558670862 | DRAFT_01530 | Protein_length | 189aa                                                                |          |
| 2558670862 | DRAFT_01530 | GC             |                                                                      | 0.56     |
| 2558670863 | DRAFT_01531 | Locus_type     | CDS                                                                  |          |
| 2558670863 | DRAFT_01531 | Product_name   | hypothetical protein                                                 |          |
| 2558670863 | DRAFT_01531 | Scaffold       | DRAFT_contig_70_472_len_12013_read_count_183073.41                   |          |
| 2558670863 | DRAFT_01531 | Coordinates    | 6188..6433(+)                                                        |          |
| 2558670863 | DRAFT_01531 | DNA_length     | 246bp                                                                |          |
| 2558670863 | DRAFT_01531 | Protein_length | 81aa                                                                 |          |
| 2558670863 | DRAFT_01531 | GC             |                                                                      | 0.61     |
| 2558670864 | DRAFT_01532 | pfam07690      | MFS_1                                                                | 1.90E-45 |
| 2558670864 | DRAFT_01532 | TIGR00711      | drug resistance transporter, EmrB/QacA subfamily                     | 1.00E-57 |
| 2558670864 | DRAFT_01532 | Locus_type     | CDS                                                                  |          |
| 2558670864 | DRAFT_01532 | Product_name   | Arabinose efflux permease                                            |          |
| 2558670864 | DRAFT_01532 | Scaffold       | DRAFT_contig_70_472_len_12013_read_count_183073.41                   |          |
| 2558670864 | DRAFT_01532 | Coordinates    | 6589..7962(+)                                                        |          |
| 2558670864 | DRAFT_01532 | DNA_length     | 1374bp                                                               |          |
| 2558670864 | DRAFT_01532 | Protein_length | 457aa                                                                |          |
| 2558670864 | DRAFT_01532 | GC             |                                                                      | 0.6      |
| 2558670864 | DRAFT_01532 | Transmembrane  | Yes                                                                  |          |
| 2558670865 | DRAFT_01533 | COG_category   | [S] Function unknown                                                 |          |
| 2558670865 | DRAFT_01533 | COG3189        | Uncharacterized conserved protein                                    | 2.00E-19 |
| 2558670865 | DRAFT_01533 | pfam04343      | DUF488                                                               | 1.30E-20 |
| 2558670865 | DRAFT_01533 | Locus_type     | CDS                                                                  |          |

|            |             |                |                                                             |           |
|------------|-------------|----------------|-------------------------------------------------------------|-----------|
| 2558670865 | DRAFT_01533 | Product_name   | Uncharacterized conserved protein                           |           |
| 2558670865 | DRAFT_01533 | Scaffold       | DRAFT_contig_70_472_len_12013_read_count_183073.41          |           |
| 2558670865 | DRAFT_01533 | Coordinates    | 8152..8496(+)                                               |           |
| 2558670865 | DRAFT_01533 | DNA_length     | 345bp                                                       |           |
| 2558670865 | DRAFT_01533 | Protein_length | 114aa                                                       |           |
| 2558670865 | DRAFT_01533 | GC             |                                                             | 0.57      |
|            |             |                |                                                             |           |
| 2558670866 | DRAFT_01534 | COG_category   | [S] Function unknown                                        |           |
| 2558670866 | DRAFT_01534 | COG4832        | Uncharacterized conserved protein                           | 1.00E-54  |
| 2558670866 | DRAFT_01534 | pfam06445      | Gyrl-like                                                   | 2.50E-21  |
| 2558670866 | DRAFT_01534 | Locus_type     | CDS                                                         |           |
| 2558670866 | DRAFT_01534 | Product_name   | Uncharacterized conserved protein                           |           |
| 2558670866 | DRAFT_01534 | Scaffold       | DRAFT_contig_70_472_len_12013_read_count_183073.41          |           |
| 2558670866 | DRAFT_01534 | Coordinates    | 8690..9310(+)                                               |           |
| 2558670866 | DRAFT_01534 | DNA_length     | 621bp                                                       |           |
| 2558670866 | DRAFT_01534 | Protein_length | 206aa                                                       |           |
| 2558670866 | DRAFT_01534 | GC             |                                                             | 0.53      |
|            |             |                |                                                             |           |
| 2558670867 | DRAFT_01535 | Locus_type     | CDS                                                         |           |
| 2558670867 | DRAFT_01535 | Product_name   | hypothetical protein                                        |           |
| 2558670867 | DRAFT_01535 | Scaffold       | DRAFT_contig_70_472_len_12013_read_count_183073.41          |           |
| 2558670867 | DRAFT_01535 | Coordinates    | 9378..10436(-)                                              |           |
| 2558670867 | DRAFT_01535 | DNA_length     | 1059bp                                                      |           |
| 2558670867 | DRAFT_01535 | Protein_length | 352aa                                                       |           |
| 2558670867 | DRAFT_01535 | GC             |                                                             | 0.58      |
|            |             |                |                                                             |           |
| 2558670868 | DRAFT_01536 | COG_category   | [E] Amino acid transport and metabolism                     |           |
| 2558670868 | DRAFT_01536 | COG1505        | Serine proteases of the peptidase family S9A                | 2.00E-100 |
| 2558670868 | DRAFT_01536 | pfam00326      | Peptidase_S9                                                | 5.20E-56  |
| 2558670868 | DRAFT_01536 | EC:3.4.21.26   | Prolyl oligopeptidase.                                      |           |
| 2558670868 | DRAFT_01536 | KO:K01322      | prolyl oligopeptidase [EC:3.4.21.26]                        | 0.00E+00  |
| 2558670868 | DRAFT_01536 | ITERM:04609    | prolyl oligopeptidase. Serine peptidase. MEROPS family S09A |           |
| 2558670868 | DRAFT_01536 | Locus_type     | CDS                                                         |           |
| 2558670868 | DRAFT_01536 | Product_name   | prolyl oligopeptidase. Serine peptidase. MEROPS family S09A |           |

|            |             |                |                                                     |                                                     |          |
|------------|-------------|----------------|-----------------------------------------------------|-----------------------------------------------------|----------|
| 2558670868 | DRAFT_01536 | Scaffold       |                                                     | DRAFT_contig_70_472_len_12013_read_count_183073.41  |          |
| 2558670868 | DRAFT_01536 | Coordinates    |                                                     | 10532..12010(-)                                     |          |
| 2558670868 | DRAFT_01536 | DNA_length     |                                                     | 1479bp                                              |          |
| 2558670868 | DRAFT_01536 | Protein_length |                                                     | 492aa                                               |          |
| 2558670868 | DRAFT_01536 | GC             |                                                     |                                                     | 0.62     |
|            |             |                |                                                     |                                                     |          |
| 2558670869 | DRAFT_01537 | Locus_type     |                                                     | CDS                                                 |          |
| 2558670869 | DRAFT_01537 | Product_name   |                                                     | hypothetical protein                                |          |
| 2558670869 | DRAFT_01537 | Scaffold       |                                                     | DRAFT_contig_70_494_len_11744_read_count_211670.42  |          |
| 2558670869 | DRAFT_01537 | Coordinates    |                                                     | 183..608(-)                                         |          |
| 2558670869 | DRAFT_01537 | DNA_length     |                                                     | 426bp                                               |          |
| 2558670869 | DRAFT_01537 | Protein_length |                                                     | 141aa                                               |          |
| 2558670869 | DRAFT_01537 | GC             |                                                     |                                                     | 0.5      |
|            |             |                |                                                     |                                                     |          |
| 2558670870 | DRAFT_01538 | pfam09721      | Exosortase_EpsH                                     |                                                     | 7.70E-16 |
| 2558670870 | DRAFT_01538 | TIGR04178      | exosortase/archaeosortase family protein            |                                                     | 1.60E-17 |
| 2558670870 | DRAFT_01538 | Locus_type     |                                                     | CDS                                                 |          |
| 2558670870 | DRAFT_01538 | Product_name   |                                                     | exosortase/archaeosortase family protein            |          |
| 2558670870 | DRAFT_01538 | Scaffold       |                                                     | DRAFT_contig_70_494_len_11744_read_count_211670.42  |          |
| 2558670870 | DRAFT_01538 | Coordinates    |                                                     | 741..1682(+)                                        |          |
| 2558670870 | DRAFT_01538 | DNA_length     |                                                     | 942bp                                               |          |
| 2558670870 | DRAFT_01538 | Protein_length |                                                     | 313aa                                               |          |
| 2558670870 | DRAFT_01538 | GC             |                                                     |                                                     | 0.5      |
| 2558670870 | DRAFT_01538 | Transmembrane  |                                                     | Yes                                                 |          |
|            |             |                |                                                     |                                                     |          |
| 2558670871 | DRAFT_01539 | COG_category   | [E] Amino acid transport and metabolism             |                                                     |          |
| 2558670871 | DRAFT_01539 | COG1506        | Dipeptidyl aminopeptidases/acylaminoacyl-peptidases |                                                     | 2.00E-47 |
| 2558670871 | DRAFT_01539 | pfam00326      | Peptidase_S9                                        |                                                     | 6.00E-36 |
| 2558670871 | DRAFT_01539 | Locus_type     |                                                     | CDS                                                 |          |
| 2558670871 | DRAFT_01539 | Product_name   |                                                     | Dipeptidyl aminopeptidases/acylaminoacyl-peptidases |          |
| 2558670871 | DRAFT_01539 | Scaffold       |                                                     | DRAFT_contig_70_494_len_11744_read_count_211670.42  |          |
| 2558670871 | DRAFT_01539 | Coordinates    |                                                     | 2074..3909(+)                                       |          |
| 2558670871 | DRAFT_01539 | DNA_length     |                                                     | 1836bp                                              |          |
| 2558670871 | DRAFT_01539 | Protein_length |                                                     | 611aa                                               |          |

|            |             |                |                                                    |          |
|------------|-------------|----------------|----------------------------------------------------|----------|
| 2558670871 | DRAFT_01539 | GC             |                                                    | 0.62     |
| 2558670872 | DRAFT_01540 | COG_category   | [R] General function prediction only               |          |
| 2558670872 | DRAFT_01540 | COG0456        | Acetyltransferases                                 | 9.00E-09 |
| 2558670872 | DRAFT_01540 | pfam00583      | Acetyltransf_1                                     | 1.70E-13 |
| 2558670872 | DRAFT_01540 | Locus_type     | CDS                                                |          |
| 2558670872 | DRAFT_01540 | Product_name   | Acetyltransferases                                 |          |
| 2558670872 | DRAFT_01540 | Scaffold       | DRAFT_contig_70_494_len_11744_read_count_211670.42 |          |
| 2558670872 | DRAFT_01540 | Coordinates    | 4044..4502(-)                                      |          |
| 2558670872 | DRAFT_01540 | DNA_length     | 459bp                                              |          |
| 2558670872 | DRAFT_01540 | Protein_length | 152aa                                              |          |
| 2558670872 | DRAFT_01540 | GC             |                                                    | 0.51     |
| 2558670873 | DRAFT_01541 | COG_category   | [E] Amino acid transport and metabolism            |          |
| 2558670873 | DRAFT_01541 | COG2309        | Leucyl aminopeptidase (aminopeptidase T)           | 1.00E-21 |
| 2558670873 | DRAFT_01541 | pfam02073      | Peptidase_M29                                      | 6.00E-17 |
| 2558670873 | DRAFT_01541 | Locus_type     | CDS                                                |          |
| 2558670873 | DRAFT_01541 | Product_name   | Leucyl aminopeptidase (aminopeptidase T)           |          |
| 2558670873 | DRAFT_01541 | Scaffold       | DRAFT_contig_70_494_len_11744_read_count_211670.42 |          |
| 2558670873 | DRAFT_01541 | Coordinates    | 4644..5789(+)                                      |          |
| 2558670873 | DRAFT_01541 | DNA_length     | 1146bp                                             |          |
| 2558670873 | DRAFT_01541 | Protein_length | 381aa                                              |          |
| 2558670873 | DRAFT_01541 | GC             |                                                    | 0.53     |
| 2558670874 | DRAFT_01542 | Locus_type     | CDS                                                |          |
| 2558670874 | DRAFT_01542 | Product_name   | hypothetical protein                               |          |
| 2558670874 | DRAFT_01542 | Scaffold       | DRAFT_contig_70_494_len_11744_read_count_211670.42 |          |
| 2558670874 | DRAFT_01542 | Coordinates    | 5876..6070(+)                                      |          |
| 2558670874 | DRAFT_01542 | DNA_length     | 195bp                                              |          |
| 2558670874 | DRAFT_01542 | Protein_length | 64aa                                               |          |
| 2558670874 | DRAFT_01542 | GC             |                                                    | 0.54     |
| 2558670875 | DRAFT_01543 | Locus_type     | CDS                                                |          |
| 2558670875 | DRAFT_01543 | Product_name   | hypothetical protein                               |          |

|            |             |                |                                      |                                                    |
|------------|-------------|----------------|--------------------------------------|----------------------------------------------------|
| 2558670875 | DRAFT_01543 | Scaffold       |                                      | DRAFT_contig_70_494_len_11744_read_count_211670.42 |
| 2558670875 | DRAFT_01543 | Coordinates    |                                      | 6083..6775(-)                                      |
| 2558670875 | DRAFT_01543 | DNA_length     |                                      | 693bp                                              |
| 2558670875 | DRAFT_01543 | Protein_length |                                      | 230aa                                              |
| 2558670875 | DRAFT_01543 | GC             |                                      | 0.5                                                |
| 2558670875 | DRAFT_01543 | Transmembrane  |                                      | Yes                                                |
|            |             |                |                                      |                                                    |
| 2558670876 | DRAFT_01544 | Locus_type     |                                      | tRNA                                               |
| 2558670876 | DRAFT_01544 | Product_name   |                                      | tRNA_Pro_GGG                                       |
| 2558670876 | DRAFT_01544 | Scaffold       |                                      | DRAFT_contig_70_494_len_11744_read_count_211670.42 |
| 2558670876 | DRAFT_01544 | Coordinates    |                                      | 7789..7864(+)                                      |
| 2558670876 | DRAFT_01544 | DNA_length     |                                      | 76bp                                               |
| 2558670876 | DRAFT_01544 | GC             |                                      | 0.64                                               |
|            |             |                |                                      |                                                    |
| 2558670877 | DRAFT_01545 | pfam01040      | UbiA                                 | 1.10E-20                                           |
| 2558670877 | DRAFT_01545 | Locus_type     |                                      | CDS                                                |
| 2558670877 | DRAFT_01545 | Product_name   |                                      | 1,4-dihydroxy-2-naphthoate octaprenyltransferase   |
| 2558670877 | DRAFT_01545 | Scaffold       |                                      | DRAFT_contig_70_494_len_11744_read_count_211670.42 |
| 2558670877 | DRAFT_01545 | Coordinates    |                                      | 7943..8581(-)                                      |
| 2558670877 | DRAFT_01545 | DNA_length     |                                      | 639bp                                              |
| 2558670877 | DRAFT_01545 | Protein_length |                                      | 212aa                                              |
| 2558670877 | DRAFT_01545 | GC             |                                      | 0.57                                               |
| 2558670877 | DRAFT_01545 | Transmembrane  |                                      | Yes                                                |
|            |             |                |                                      |                                                    |
| 2558670878 | DRAFT_01546 | pfam13426      | PAS_9                                | 5.70E-07                                           |
| 2558670878 | DRAFT_01546 | Locus_type     |                                      | CDS                                                |
| 2558670878 | DRAFT_01546 | Product_name   |                                      | PAS domain                                         |
| 2558670878 | DRAFT_01546 | Scaffold       |                                      | DRAFT_contig_70_494_len_11744_read_count_211670.42 |
| 2558670878 | DRAFT_01546 | Coordinates    |                                      | 8858..9202(-)                                      |
| 2558670878 | DRAFT_01546 | DNA_length     |                                      | 345bp                                              |
| 2558670878 | DRAFT_01546 | Protein_length |                                      | 114aa                                              |
| 2558670878 | DRAFT_01546 | GC             |                                      | 0.58                                               |
|            |             |                |                                      |                                                    |
| 2558670879 | DRAFT_01547 | COG_category   | [R] General function prediction only |                                                    |

|            |             |                |                                                                       |          |
|------------|-------------|----------------|-----------------------------------------------------------------------|----------|
| 2558670879 | DRAFT_01547 | COG3654        | Prophage maintenance system killer protein                            | 5.00E-09 |
| 2558670879 | DRAFT_01547 | pfam02661      | Fic                                                                   | 1.00E-05 |
| 2558670879 | DRAFT_01547 | TIGR01550      | death-on-curing family protein                                        | 5.00E-16 |
| 2558670879 | DRAFT_01547 | KO:K07341      | death on curing protein                                               | 2.10E-06 |
| 2558670879 | DRAFT_01547 | Locus_type     | CDS                                                                   |          |
| 2558670879 | DRAFT_01547 | Product_name   | death-on-curing family protein                                        |          |
| 2558670879 | DRAFT_01547 | Scaffold       | DRAFT_contig_70_494_len_11744_read_count_211670.42                    |          |
| 2558670879 | DRAFT_01547 | Coordinates    | 9397..9888(+)                                                         |          |
| 2558670879 | DRAFT_01547 | DNA_length     | 492bp                                                                 |          |
| 2558670879 | DRAFT_01547 | Protein_length | 163aa                                                                 |          |
| 2558670879 | DRAFT_01547 | GC             |                                                                       | 0.58     |
| 2558670880 | DRAFT_01548 | COG_category   | [R] General function prediction only                                  |          |
| 2558670880 | DRAFT_01548 | COG0375        | Zn finger protein HypA/HybF (possibly regulating hydrogenase expressi | 8.00E-13 |
| 2558670880 | DRAFT_01548 | pfam01155      | HypA                                                                  | 7.30E-19 |
| 2558670880 | DRAFT_01548 | KO:K04651      | hydrogenase nickel incorporation protein HypA/HybF                    | 8.70E-10 |
| 2558670880 | DRAFT_01548 | Locus_type     | CDS                                                                   |          |
| 2558670880 | DRAFT_01548 | Product_name   | Zn finger protein HypA/HybF (possibly regulating hydrogenase expres   |          |
| 2558670880 | DRAFT_01548 | Scaffold       | DRAFT_contig_70_494_len_11744_read_count_211670.42                    |          |
| 2558670880 | DRAFT_01548 | Coordinates    | 10080..10433(+)                                                       |          |
| 2558670880 | DRAFT_01548 | DNA_length     | 354bp                                                                 |          |
| 2558670880 | DRAFT_01548 | Protein_length | 117aa                                                                 |          |
| 2558670880 | DRAFT_01548 | GC             |                                                                       | 0.61     |
| 2558670881 | DRAFT_01549 | COG_category   | [C] Energy production and conversion                                  |          |
| 2558670881 | DRAFT_01549 | COG0680        | Ni,Fe-hydrogenase maturation factor                                   | 5.00E-11 |
| 2558670881 | DRAFT_01549 | pfam01750      | Hycl                                                                  | 2.50E-08 |
| 2558670881 | DRAFT_01549 | TIGR00072      | hydrogenase maturation protease                                       | 7.80E-30 |
| 2558670881 | DRAFT_01549 | Locus_type     | CDS                                                                   |          |
| 2558670881 | DRAFT_01549 | Product_name   | hydrogenase maturation protease                                       |          |
| 2558670881 | DRAFT_01549 | Scaffold       | DRAFT_contig_70_494_len_11744_read_count_211670.42                    |          |
| 2558670881 | DRAFT_01549 | Coordinates    | 10472..10957(+)                                                       |          |
| 2558670881 | DRAFT_01549 | DNA_length     | 486bp                                                                 |          |
| 2558670881 | DRAFT_01549 | Protein_length | 161aa                                                                 |          |

|            |             |                |                                                    |          |
|------------|-------------|----------------|----------------------------------------------------|----------|
| 2558670881 | DRAFT_01549 | GC             |                                                    | 0.56     |
| 2558670882 | DRAFT_01550 | Locus_type     | CDS                                                |          |
| 2558670882 | DRAFT_01550 | Product_name   | hypothetical protein                               |          |
| 2558670882 | DRAFT_01550 | Scaffold       | DRAFT_contig_70_494_len_11744_read_count_211670.42 |          |
| 2558670882 | DRAFT_01550 | Coordinates    | 10954..11298(+)                                    |          |
| 2558670882 | DRAFT_01550 | DNA_length     | 345bp                                              |          |
| 2558670882 | DRAFT_01550 | Protein_length | 114aa                                              |          |
| 2558670882 | DRAFT_01550 | GC             |                                                    | 0.6      |
| 2558670882 | DRAFT_01550 | Transmembrane  | Yes                                                |          |
| 2558670883 | DRAFT_01551 | COG_category   | [C] Energy production and conversion               |          |
| 2558670883 | DRAFT_01551 | COG3260        | Ni,Fe-hydrogenase III small subunit                | 3.00E-47 |
| 2558670883 | DRAFT_01551 | pfam01058      | Oxidored_q6                                        | 4.10E-26 |
| 2558670883 | DRAFT_01551 | EC:1.6.99.3    | NADH dehydrogenase.                                |          |
| 2558670883 | DRAFT_01551 | TIGR01957      | NADH-quinone oxidoreductase, B subunit             | 3.10E-47 |
| 2558670883 | DRAFT_01551 | KO:K00356      | NADH dehydrogenase [EC:1.6.99.3]                   | 4.60E-44 |
| 2558670883 | DRAFT_01551 | Locus_type     | CDS                                                |          |
| 2558670883 | DRAFT_01551 | Product_name   | Membrane bound hydrogenase subunit mbhJ            |          |
| 2558670883 | DRAFT_01551 | Scaffold       | DRAFT_contig_70_494_len_11744_read_count_211670.42 |          |
| 2558670883 | DRAFT_01551 | Coordinates    | 11285..11743(+)                                    |          |
| 2558670883 | DRAFT_01551 | DNA_length     | 459bp                                              |          |
| 2558670883 | DRAFT_01551 | Protein_length | 153aa                                              |          |
| 2558670883 | DRAFT_01551 | GC             |                                                    | 0.6      |
| 2558670884 | DRAFT_01552 | pfam00188      | CAP                                                | 1.30E-07 |
| 2558670884 | DRAFT_01552 | Locus_type     | CDS                                                |          |
| 2558670884 | DRAFT_01552 | Product_name   | Cysteine-rich secretory protein family             |          |
| 2558670884 | DRAFT_01552 | Scaffold       | DRAFT_contig_70_498_len_11660_read_count_202600.43 |          |
| 2558670884 | DRAFT_01552 | Coordinates    | 297..1418(+)                                       |          |
| 2558670884 | DRAFT_01552 | DNA_length     | 1122bp                                             |          |
| 2558670884 | DRAFT_01552 | Protein_length | 373aa                                              |          |
| 2558670884 | DRAFT_01552 | GC             |                                                    | 0.57     |
| 2558670884 | DRAFT_01552 | Transmembrane  | Yes                                                |          |

|            |             |                |                                                                      |          |
|------------|-------------|----------------|----------------------------------------------------------------------|----------|
| 2558670885 | DRAFT_01553 | COG_category   | [R] General function prediction only                                 |          |
| 2558670885 | DRAFT_01553 | COG_category   | [G] Carbohydrate transport and metabolism                            |          |
| 2558670885 | DRAFT_01553 | COG_category   | [F] Nucleotide transport and metabolism                              |          |
| 2558670885 | DRAFT_01553 | COG0537        | Diadenosine tetraphosphate (Ap4A) hydrolase and other HIT family hyc | 3.00E-31 |
| 2558670885 | DRAFT_01553 | pfam01230      | HIT                                                                  | 1.20E-24 |
| 2558670885 | DRAFT_01553 | KO:K02503      | Hit-like protein involved in cell-cycle regulation                   | 2.30E-24 |
| 2558670885 | DRAFT_01553 | Locus_type     | CDS                                                                  |          |
| 2558670885 | DRAFT_01553 | Product_name   | Diadenosine tetraphosphate (Ap4A) hydrolase and other HIT family h   |          |
| 2558670885 | DRAFT_01553 | Scaffold       | DRAFT_contig_70_498_len_11660_read_count_202600.43                   |          |
| 2558670885 | DRAFT_01553 | Coordinates    | 1428..1880(-)                                                        |          |
| 2558670885 | DRAFT_01553 | DNA_length     | 453bp                                                                |          |
| 2558670885 | DRAFT_01553 | Protein_length | 150aa                                                                |          |
| 2558670885 | DRAFT_01553 | GC             |                                                                      | 0.57     |
| 2558670886 | DRAFT_01554 | Locus_type     | CDS                                                                  |          |
| 2558670886 | DRAFT_01554 | Product_name   | hypothetical protein                                                 |          |
| 2558670886 | DRAFT_01554 | Scaffold       | DRAFT_contig_70_498_len_11660_read_count_202600.43                   |          |
| 2558670886 | DRAFT_01554 | Coordinates    | 1971..2129(+)                                                        |          |
| 2558670886 | DRAFT_01554 | DNA_length     | 159bp                                                                |          |
| 2558670886 | DRAFT_01554 | Protein_length | 52aa                                                                 |          |
| 2558670886 | DRAFT_01554 | GC             |                                                                      | 0.57     |
| 2558670887 | DRAFT_01555 | Locus_type     | CDS                                                                  |          |
| 2558670887 | DRAFT_01555 | Product_name   | hypothetical protein                                                 |          |
| 2558670887 | DRAFT_01555 | Scaffold       | DRAFT_contig_70_498_len_11660_read_count_202600.43                   |          |
| 2558670887 | DRAFT_01555 | Coordinates    | 2152..2520(-)                                                        |          |
| 2558670887 | DRAFT_01555 | DNA_length     | 369bp                                                                |          |
| 2558670887 | DRAFT_01555 | Protein_length | 122aa                                                                |          |
| 2558670887 | DRAFT_01555 | GC             |                                                                      | 0.56     |
| 2558670888 | DRAFT_01556 | Locus_type     | CDS                                                                  |          |
| 2558670888 | DRAFT_01556 | Product_name   | hypothetical protein                                                 |          |
| 2558670888 | DRAFT_01556 | Scaffold       | DRAFT_contig_70_498_len_11660_read_count_202600.43                   |          |



|            |             |                |                                                    |          |
|------------|-------------|----------------|----------------------------------------------------|----------|
| 2558670888 | DRAFT_01556 | Coordinates    | 2825..3508(-)                                      |          |
| 2558670888 | DRAFT_01556 | DNA_length     | 684bp                                              |          |
| 2558670888 | DRAFT_01556 | Protein_length | 227aa                                              |          |
| 2558670888 | DRAFT_01556 | GC             |                                                    | 0.58     |
| 2558670888 | DRAFT_01556 | Transmembrane  | Yes                                                |          |
|            |             |                |                                                    |          |
| 2558670889 | DRAFT_01557 | Locus_type     | CDS                                                |          |
| 2558670889 | DRAFT_01557 | Product_name   | hypothetical protein                               |          |
| 2558670889 | DRAFT_01557 | Scaffold       | DRAFT_contig_70_498_len_11660_read_count_202600.43 |          |
| 2558670889 | DRAFT_01557 | Coordinates    | 3495..4079(-)                                      |          |
| 2558670889 | DRAFT_01557 | DNA_length     | 585bp                                              |          |
| 2558670889 | DRAFT_01557 | Protein_length | 194aa                                              |          |
| 2558670889 | DRAFT_01557 | GC             |                                                    | 0.6      |
| 2558670889 | DRAFT_01557 | Transmembrane  | Yes                                                |          |
|            |             |                |                                                    |          |
| 2558670890 | DRAFT_01558 | Locus_type     | CDS                                                |          |
| 2558670890 | DRAFT_01558 | Product_name   | hypothetical protein                               |          |
| 2558670890 | DRAFT_01558 | Scaffold       | DRAFT_contig_70_498_len_11660_read_count_202600.43 |          |
| 2558670890 | DRAFT_01558 | Coordinates    | 4159..4779(+)                                      |          |
| 2558670890 | DRAFT_01558 | DNA_length     | 621bp                                              |          |
| 2558670890 | DRAFT_01558 | Protein_length | 206aa                                              |          |
| 2558670890 | DRAFT_01558 | GC             |                                                    | 0.62     |
|            |             |                |                                                    |          |
| 2558670891 | DRAFT_01559 | COG_category   | [R] General function prediction only               |          |
| 2558670891 | DRAFT_01559 | COG2151        | Predicted metal-sulfur cluster biosynthetic enzyme | 6.00E-07 |
| 2558670891 | DRAFT_01559 | pfam01883      | DUF59                                              | 2.30E-11 |
| 2558670891 | DRAFT_01559 | Locus_type     | CDS                                                |          |
| 2558670891 | DRAFT_01559 | Product_name   | Predicted metal-sulfur cluster biosynthetic enzyme |          |
| 2558670891 | DRAFT_01559 | Scaffold       | DRAFT_contig_70_498_len_11660_read_count_202600.43 |          |
| 2558670891 | DRAFT_01559 | Coordinates    | 4780..5124(-)                                      |          |
| 2558670891 | DRAFT_01559 | DNA_length     | 345bp                                              |          |
| 2558670891 | DRAFT_01559 | Protein_length | 114aa                                              |          |
| 2558670891 | DRAFT_01559 | GC             |                                                    | 0.52     |

|            |             |                |                                                                      |           |
|------------|-------------|----------------|----------------------------------------------------------------------|-----------|
| 2558670892 | DRAFT_01560 | COG_category   | [C] Energy production and conversion                                 |           |
| 2558670892 | DRAFT_01560 | COG2141        | Coenzyme F420-dependent N5,N10-methylene tetrahydromethanopte        | 1.00E-25  |
| 2558670892 | DRAFT_01560 | pfam00296      | Bac_luciferase                                                       | 1.30E-54  |
| 2558670892 | DRAFT_01560 | TIGR03617      | probable F420-dependent oxidoreductase, MSMEG_2256 family            | 1.60E-127 |
| 2558670892 | DRAFT_01560 | Locus_type     | CDS                                                                  |           |
| 2558670892 | DRAFT_01560 | Product_name   | probable F420-dependent oxidoreductase, MSMEG_2256 family            |           |
| 2558670892 | DRAFT_01560 | Scaffold       | DRAFT_contig_70_498_len_11660_read_count_202600.43                   |           |
| 2558670892 | DRAFT_01560 | Coordinates    | 5259..6266(-)                                                        |           |
| 2558670892 | DRAFT_01560 | DNA_length     | 1008bp                                                               |           |
| 2558670892 | DRAFT_01560 | Protein_length | 335aa                                                                |           |
| 2558670892 | DRAFT_01560 | GC             |                                                                      | 0.61      |
| 2558670893 | DRAFT_01561 | pfam13463      | HTH_27                                                               | 7.80E-05  |
| 2558670893 | DRAFT_01561 | Locus_type     | CDS                                                                  |           |
| 2558670893 | DRAFT_01561 | Product_name   | Winged helix DNA-binding domain                                      |           |
| 2558670893 | DRAFT_01561 | Scaffold       | DRAFT_contig_70_498_len_11660_read_count_202600.43                   |           |
| 2558670893 | DRAFT_01561 | Coordinates    | 6867..7091(+)                                                        |           |
| 2558670893 | DRAFT_01561 | DNA_length     | 225bp                                                                |           |
| 2558670893 | DRAFT_01561 | Protein_length | 74aa                                                                 |           |
| 2558670893 | DRAFT_01561 | GC             |                                                                      | 0.54      |
| 2558670894 | DRAFT_01562 | Locus_type     | CDS                                                                  |           |
| 2558670894 | DRAFT_01562 | Product_name   | hypothetical protein                                                 |           |
| 2558670894 | DRAFT_01562 | Scaffold       | DRAFT_contig_70_498_len_11660_read_count_202600.43                   |           |
| 2558670894 | DRAFT_01562 | Coordinates    | 7045..7179(+)                                                        |           |
| 2558670894 | DRAFT_01562 | DNA_length     | 135bp                                                                |           |
| 2558670894 | DRAFT_01562 | Protein_length | 44aa                                                                 |           |
| 2558670894 | DRAFT_01562 | GC             |                                                                      | 0.53      |
| 2558670895 | DRAFT_01563 | COG_category   | [R] General function prediction only                                 |           |
| 2558670895 | DRAFT_01563 | COG2872        | Predicted metal-dependent hydrolases related to alanyl-tRNA syntheta | 3.00E-56  |
| 2558670895 | DRAFT_01563 | pfam01411      | tRNA-synt_2c                                                         | 3.80E-07  |
| 2558670895 | DRAFT_01563 | pfam07973      | tRNA_SAD                                                             | 6.70E-12  |
| 2558670895 | DRAFT_01563 | Locus_type     | CDS                                                                  |           |

|            |             |                |                                                                     |           |
|------------|-------------|----------------|---------------------------------------------------------------------|-----------|
| 2558670895 | DRAFT_01563 | Product_name   | Predicted metal-dependent hydrolases related to alanyl-tRNA synthet |           |
| 2558670895 | DRAFT_01563 | Scaffold       | DRAFT_contig_70_498_len_11660_read_count_202600.43                  |           |
| 2558670895 | DRAFT_01563 | Coordinates    | 7262..7930(-)                                                       |           |
| 2558670895 | DRAFT_01563 | DNA_length     | 669bp                                                               |           |
| 2558670895 | DRAFT_01563 | Protein_length | 222aa                                                               |           |
| 2558670895 | DRAFT_01563 | GC             |                                                                     | 0.57      |
|            |             |                |                                                                     |           |
| 2558670896 | DRAFT_01564 | COG_category   | [S] Function unknown                                                |           |
| 2558670896 | DRAFT_01564 | COG1602        | Uncharacterized conserved protein                                   | 2.00E-119 |
| 2558670896 | DRAFT_01564 | pfam04894      | DUF650                                                              | 4.60E-100 |
| 2558670896 | DRAFT_01564 | pfam04895      | DUF651                                                              | 4.10E-33  |
| 2558670896 | DRAFT_01564 | Locus_type     | CDS                                                                 |           |
| 2558670896 | DRAFT_01564 | Product_name   | Uncharacterized conserved protein                                   |           |
| 2558670896 | DRAFT_01564 | Scaffold       | DRAFT_contig_70_498_len_11660_read_count_202600.43                  |           |
| 2558670896 | DRAFT_01564 | Coordinates    | 8000..9316(-)                                                       |           |
| 2558670896 | DRAFT_01564 | DNA_length     | 1317bp                                                              |           |
| 2558670896 | DRAFT_01564 | Protein_length | 438aa                                                               |           |
| 2558670896 | DRAFT_01564 | GC             |                                                                     | 0.62      |
|            |             |                |                                                                     |           |
| 2558670897 | DRAFT_01565 | COG_category   | [L] Replication, recombination and repair                           |           |
| 2558670897 | DRAFT_01565 | COG0420        | DNA repair exonuclease                                              | 2.00E-30  |
| 2558670897 | DRAFT_01565 | pfam12850      | Metallophos_2                                                       | 1.60E-14  |
| 2558670897 | DRAFT_01565 | Locus_type     | CDS                                                                 |           |
| 2558670897 | DRAFT_01565 | Product_name   | DNA repair exonuclease                                              |           |
| 2558670897 | DRAFT_01565 | Scaffold       | DRAFT_contig_70_498_len_11660_read_count_202600.43                  |           |
| 2558670897 | DRAFT_01565 | Coordinates    | 9425..10675(+)                                                      |           |
| 2558670897 | DRAFT_01565 | DNA_length     | 1251bp                                                              |           |
| 2558670897 | DRAFT_01565 | Protein_length | 416aa                                                               |           |
| 2558670897 | DRAFT_01565 | GC             |                                                                     | 0.58      |
|            |             |                |                                                                     |           |
| 2558670898 | DRAFT_01566 | pfam13476      | AAA_23                                                              | 1.40E-15  |
| 2558670898 | DRAFT_01566 | Locus_type     | CDS                                                                 |           |
| 2558670898 | DRAFT_01566 | Product_name   | AAA domain                                                          |           |
| 2558670898 | DRAFT_01566 | Scaffold       | DRAFT_contig_70_498_len_11660_read_count_202600.43                  |           |

|            |             |                |                                                            |          |
|------------|-------------|----------------|------------------------------------------------------------|----------|
| 2558670898 | DRAFT_01566 | Coordinates    | 10696..11658(+)                                            |          |
| 2558670898 | DRAFT_01566 | DNA_length     | 963bp                                                      |          |
| 2558670898 | DRAFT_01566 | Protein_length | 321aa                                                      |          |
| 2558670898 | DRAFT_01566 | GC             |                                                            | 0.6      |
| 2558670899 | DRAFT_01567 | pfam01269      | Fibrillarin                                                | 8.20E-53 |
| 2558670899 | DRAFT_01567 | Locus_type     | CDS                                                        |          |
| 2558670899 | DRAFT_01567 | Product_name   | Fibrillarin-like rRNA methylase                            |          |
| 2558670899 | DRAFT_01567 | Scaffold       | DRAFT_contig_70_523_len_11378_read_count_163908.44         |          |
| 2558670899 | DRAFT_01567 | Coordinates    | 2..439(-)                                                  |          |
| 2558670899 | DRAFT_01567 | DNA_length     | 438bp                                                      |          |
| 2558670899 | DRAFT_01567 | Protein_length | 146aa                                                      |          |
| 2558670899 | DRAFT_01567 | GC             |                                                            | 0.6      |
| 2558670900 | DRAFT_01568 | COG_category   | [J] Translation, ribosomal structure and biogenesis        |          |
| 2558670900 | DRAFT_01568 | COG1498        | Protein implicated in ribosomal biogenesis, Nop56p homolog | 9.00E-76 |
| 2558670900 | DRAFT_01568 | pfam08060      | NOSIC                                                      | 1.30E-15 |
| 2558670900 | DRAFT_01568 | pfam01798      | Nop                                                        | 1.20E-50 |
| 2558670900 | DRAFT_01568 | KO:K14564      | nucleolar protein 56                                       | 0.00E+00 |
| 2558670900 | DRAFT_01568 | ITERM:02514    | rRNA biogenesis protein Nop56/Nop58                        |          |
| 2558670900 | DRAFT_01568 | Locus_type     | CDS                                                        |          |
| 2558670900 | DRAFT_01568 | Product_name   | rRNA biogenesis protein Nop56/Nop58                        |          |
| 2558670900 | DRAFT_01568 | Scaffold       | DRAFT_contig_70_523_len_11378_read_count_163908.44         |          |
| 2558670900 | DRAFT_01568 | Coordinates    | 436..1392(-)                                               |          |
| 2558670900 | DRAFT_01568 | DNA_length     | 957bp                                                      |          |
| 2558670900 | DRAFT_01568 | Protein_length | 318aa                                                      |          |
| 2558670900 | DRAFT_01568 | GC             |                                                            | 0.6      |
| 2558670901 | DRAFT_01569 | COG_category   | [B] Chromatin structure and dynamics                       |          |
| 2558670901 | DRAFT_01569 | COG_category   | [K] Transcription                                          |          |
| 2558670901 | DRAFT_01569 | COG1243        | Histone acetyltransferase                                  | 0.00E+00 |
| 2558670901 | DRAFT_01569 | pfam04055      | Radical_SAM                                                | 5.10E-15 |
| 2558670901 | DRAFT_01569 | pfam00583      | Acetyltransf_1                                             | 2.80E-06 |
| 2558670901 | DRAFT_01569 | EC:2.3.1.48    | Histone acetyltransferase.                                 |          |

|            |             |                |                                                         |          |
|------------|-------------|----------------|---------------------------------------------------------|----------|
| 2558670901 | DRAFT_01569 | TIGR01211      | histone acetyltransferase, ELP3 family                  | 0.00E+00 |
| 2558670901 | DRAFT_01569 | KO:K07739      | elongator complex protein 3 [EC:2.3.1.48]               | 0.00E+00 |
| 2558670901 | DRAFT_01569 | Locus_type     | CDS                                                     |          |
| 2558670901 | DRAFT_01569 | Product_name   | histone acetyltransferase, ELP3 family                  |          |
| 2558670901 | DRAFT_01569 | Scaffold       | DRAFT_contig_70_523_len_11378_read_count_163908.44      |          |
| 2558670901 | DRAFT_01569 | Coordinates    | 1784..3379(+)                                           |          |
| 2558670901 | DRAFT_01569 | DNA_length     | 1596bp                                                  |          |
| 2558670901 | DRAFT_01569 | Protein_length | 531aa                                                   |          |
| 2558670901 | DRAFT_01569 | GC             |                                                         | 0.62     |
| 2558670902 | DRAFT_01570 | Locus_type     | CDS                                                     |          |
| 2558670902 | DRAFT_01570 | Product_name   | hypothetical protein                                    |          |
| 2558670902 | DRAFT_01570 | Scaffold       | DRAFT_contig_70_523_len_11378_read_count_163908.44      |          |
| 2558670902 | DRAFT_01570 | Coordinates    | 3399..4244(-)                                           |          |
| 2558670902 | DRAFT_01570 | DNA_length     | 846bp                                                   |          |
| 2558670902 | DRAFT_01570 | Protein_length | 281aa                                                   |          |
| 2558670902 | DRAFT_01570 | GC             |                                                         | 0.63     |
| 2558670902 | DRAFT_01570 | Transmembrane  | Yes                                                     |          |
| 2558670903 | DRAFT_01571 | KEGG_module    | M00248: Putative antibiotic transport system            |          |
| 2558670903 | DRAFT_01571 | COG_category   | [V] Defense mechanisms                                  |          |
| 2558670903 | DRAFT_01571 | COG0842        | ABC-type multidrug transport system, permease component | 1.00E-06 |
| 2558670903 | DRAFT_01571 | pfam01061      | ABC2_membrane                                           | 9.00E-10 |
| 2558670903 | DRAFT_01571 | KO:K09686      | antibiotic transport system permease protein            | 9.70E-44 |
| 2558670903 | DRAFT_01571 | Locus_type     | CDS                                                     |          |
| 2558670903 | DRAFT_01571 | Product_name   | ABC-type multidrug transport system, permease component |          |
| 2558670903 | DRAFT_01571 | Scaffold       | DRAFT_contig_70_523_len_11378_read_count_163908.44      |          |
| 2558670903 | DRAFT_01571 | Coordinates    | 4241..5050(-)                                           |          |
| 2558670903 | DRAFT_01571 | DNA_length     | 810bp                                                   |          |
| 2558670903 | DRAFT_01571 | Protein_length | 269aa                                                   |          |
| 2558670903 | DRAFT_01571 | GC             |                                                         | 0.59     |
| 2558670903 | DRAFT_01571 | Transmembrane  | Yes                                                     |          |
| 2558670904 | DRAFT_01572 | KEGG_module    | M00248: Putative antibiotic transport system            |          |

|            |             |                |                                                                    |           |
|------------|-------------|----------------|--------------------------------------------------------------------|-----------|
| 2558670904 | DRAFT_01572 | COG_category   | [V] Defense mechanisms                                             |           |
| 2558670904 | DRAFT_01572 | COG1131        | ABC-type multidrug transport system, ATPase component              | 1.00E-65  |
| 2558670904 | DRAFT_01572 | pfam00005      | ABC_tran                                                           | 1.20E-23  |
| 2558670904 | DRAFT_01572 | KO:K09687      | antibiotic transport system ATP-binding protein                    | 0.00E+00  |
| 2558670904 | DRAFT_01572 | Locus_type     | CDS                                                                |           |
| 2558670904 | DRAFT_01572 | Product_name   | ABC-type multidrug transport system, ATPase component              |           |
| 2558670904 | DRAFT_01572 | Scaffold       | DRAFT_contig_70_523_len_11378_read_count_163908.44                 |           |
| 2558670904 | DRAFT_01572 | Coordinates    | 5040..6038(-)                                                      |           |
| 2558670904 | DRAFT_01572 | DNA_length     | 999bp                                                              |           |
| 2558670904 | DRAFT_01572 | Protein_length | 332aa                                                              |           |
| 2558670904 | DRAFT_01572 | GC             |                                                                    | 0.59      |
| 2558670905 | DRAFT_01573 | Metacyc        | PWY-5921: L-glutamine biosynthesis II (tRNA-dependent)             |           |
| 2558670905 | DRAFT_01573 | COG_category   | [J] Translation, ribosomal structure and biogenesis                |           |
| 2558670905 | DRAFT_01573 | COG_category   | [E] Amino acid transport and metabolism                            |           |
| 2558670905 | DRAFT_01573 | COG0252        | L-asparaginase/archaeal Glu-tRNAGln amidotransferase subunit D     | 2.00E-81  |
| 2558670905 | DRAFT_01573 | pfam00710      | Asparaginase                                                       | 2.40E-87  |
| 2558670905 | DRAFT_01573 | EC:6.3.5.7     | Glutamyl-tRNA synthase (glutamine-hydrolyzing).                    |           |
| 2558670905 | DRAFT_01573 | TIGR00519      | L-asparaginase, type I                                             | 8.40E-107 |
| 2558670905 | DRAFT_01573 | TIGR02153      | glutamyl-tRNA(Gln) amidotransferase, subunit D                     | 0.00E+00  |
| 2558670905 | DRAFT_01573 | KO:K09482      | glutamyl-tRNA(Gln) amidotransferase subunit D [EC:6.3.5.7]         | 0.00E+00  |
| 2558670905 | DRAFT_01573 | ITERM:01532    | glutamyl-tRNA(Gln) amidotransferase subunit D (EC 6.3.5.7)         |           |
| 2558670905 | DRAFT_01573 | Locus_type     | CDS                                                                |           |
| 2558670905 | DRAFT_01573 | Product_name   | glutamyl-tRNA(Gln) amidotransferase subunit D (EC 6.3.5.7)         |           |
| 2558670905 | DRAFT_01573 | Scaffold       | DRAFT_contig_70_523_len_11378_read_count_163908.44                 |           |
| 2558670905 | DRAFT_01573 | Coordinates    | 6147..7469(+)                                                      |           |
| 2558670905 | DRAFT_01573 | DNA_length     | 1323bp                                                             |           |
| 2558670905 | DRAFT_01573 | Protein_length | 440aa                                                              |           |
| 2558670905 | DRAFT_01573 | GC             |                                                                    | 0.63      |
| 2558670906 | DRAFT_01574 | Metacyc        | PWY-5921: L-glutamine biosynthesis II (tRNA-dependent)             |           |
| 2558670906 | DRAFT_01574 | COG_category   | [J] Translation, ribosomal structure and biogenesis                |           |
| 2558670906 | DRAFT_01574 | COG2511        | Archaeal Glu-tRNAGln amidotransferase subunit E (contains GAD doma | 0.00E+00  |
| 2558670906 | DRAFT_01574 | pfam02938      | GAD                                                                | 3.60E-05  |

|            |             |                |                                                                    |          |
|------------|-------------|----------------|--------------------------------------------------------------------|----------|
| 2558670906 | DRAFT_01574 | pfam02637      | GatB_Yqey                                                          | 2.40E-21 |
| 2558670906 | DRAFT_01574 | pfam02934      | GatB_N                                                             | 5.20E-67 |
| 2558670906 | DRAFT_01574 | EC:6.3.5.7     | Glutamyl-tRNA synthase (glutamine-hydrolyzing).                    |          |
| 2558670906 | DRAFT_01574 | TIGR00134      | glutamyl-tRNA(Gln) amidotransferase, subunit E                     | 0.00E+00 |
| 2558670906 | DRAFT_01574 | KO:K03330      | glutamyl-tRNA(Gln) amidotransferase subunit E [EC:6.3.5.7]         | 0.00E+00 |
| 2558670906 | DRAFT_01574 | ITERM:01533    | glutamyl-tRNA(Gln) amidotransferase subunit E (EC 6.3.5.7)         |          |
| 2558670906 | DRAFT_01574 | Locus_type     | CDS                                                                |          |
| 2558670906 | DRAFT_01574 | Product_name   | glutamyl-tRNA(Gln) amidotransferase subunit E (EC 6.3.5.7)         |          |
| 2558670906 | DRAFT_01574 | Scaffold       | DRAFT_contig_70_523_len_11378_read_count_163908.44                 |          |
| 2558670906 | DRAFT_01574 | Coordinates    | 7466..9385(+)                                                      |          |
| 2558670906 | DRAFT_01574 | DNA_length     | 1920bp                                                             |          |
| 2558670906 | DRAFT_01574 | Protein_length | 639aa                                                              |          |
| 2558670906 | DRAFT_01574 | GC             |                                                                    | 0.59     |
| 2558670907 | DRAFT_01575 | Locus_type     | CDS                                                                |          |
| 2558670907 | DRAFT_01575 | Product_name   | hypothetical protein                                               |          |
| 2558670907 | DRAFT_01575 | Scaffold       | DRAFT_contig_70_523_len_11378_read_count_163908.44                 |          |
| 2558670907 | DRAFT_01575 | Coordinates    | 9454..10005(-)                                                     |          |
| 2558670907 | DRAFT_01575 | DNA_length     | 552bp                                                              |          |
| 2558670907 | DRAFT_01575 | Protein_length | 183aa                                                              |          |
| 2558670907 | DRAFT_01575 | GC             |                                                                    | 0.59     |
| 2558670907 | DRAFT_01575 | Transmembrane  | Yes                                                                |          |
| 2558670908 | DRAFT_01576 | COG_category   | [R] General function prediction only                               |          |
| 2558670908 | DRAFT_01576 | COG1721        | Uncharacterized conserved protein (some members contain a von Will | 5.00E-27 |
| 2558670908 | DRAFT_01576 | pfam01882      | DUF58                                                              | 5.40E-13 |
| 2558670908 | DRAFT_01576 | Locus_type     | CDS                                                                |          |
| 2558670908 | DRAFT_01576 | Product_name   | Uncharacterized conserved protein (some members contain a von Wi   |          |
| 2558670908 | DRAFT_01576 | Scaffold       | DRAFT_contig_70_523_len_11378_read_count_163908.44                 |          |
| 2558670908 | DRAFT_01576 | Coordinates    | 9954..11375(-)                                                     |          |
| 2558670908 | DRAFT_01576 | DNA_length     | 1422bp                                                             |          |
| 2558670908 | DRAFT_01576 | Protein_length | 473aa                                                              |          |
| 2558670908 | DRAFT_01576 | GC             |                                                                    | 0.59     |
| 2558670908 | DRAFT_01576 | Transmembrane  | Yes                                                                |          |

|            |             |                |        |                                                    |          |
|------------|-------------|----------------|--------|----------------------------------------------------|----------|
| 2558670909 | DRAFT_01577 | Locus_type     |        | CDS                                                |          |
| 2558670909 | DRAFT_01577 | Product_name   |        | hypothetical protein                               |          |
| 2558670909 | DRAFT_01577 | Scaffold       |        | DRAFT_contig_70_531_len_11320_read_count_197274.45 |          |
| 2558670909 | DRAFT_01577 | Coordinates    |        | 3..539(+)                                          |          |
| 2558670909 | DRAFT_01577 | DNA_length     |        | 537bp                                              |          |
| 2558670909 | DRAFT_01577 | Protein_length |        | 178aa                                              |          |
| 2558670909 | DRAFT_01577 | GC             |        |                                                    | 0.52     |
|            |             |                |        |                                                    |          |
| 2558670910 | DRAFT_01578 | Locus_type     |        | CDS                                                |          |
| 2558670910 | DRAFT_01578 | Product_name   |        | hypothetical protein                               |          |
| 2558670910 | DRAFT_01578 | Scaffold       |        | DRAFT_contig_70_531_len_11320_read_count_197274.45 |          |
| 2558670910 | DRAFT_01578 | Coordinates    |        | 962..1258(+)                                       |          |
| 2558670910 | DRAFT_01578 | DNA_length     |        | 297bp                                              |          |
| 2558670910 | DRAFT_01578 | Protein_length |        | 98aa                                               |          |
| 2558670910 | DRAFT_01578 | GC             |        |                                                    | 0.59     |
|            |             |                |        |                                                    |          |
| 2558670911 | DRAFT_01579 | Locus_type     |        | CDS                                                |          |
| 2558670911 | DRAFT_01579 | Product_name   |        | hypothetical protein                               |          |
| 2558670911 | DRAFT_01579 | Scaffold       |        | DRAFT_contig_70_531_len_11320_read_count_197274.45 |          |
| 2558670911 | DRAFT_01579 | Coordinates    |        | 1255..1416(+)                                      |          |
| 2558670911 | DRAFT_01579 | DNA_length     |        | 162bp                                              |          |
| 2558670911 | DRAFT_01579 | Protein_length |        | 53aa                                               |          |
| 2558670911 | DRAFT_01579 | GC             |        |                                                    | 0.51     |
|            |             |                |        |                                                    |          |
| 2558670912 | DRAFT_01580 | Locus_type     |        | CDS                                                |          |
| 2558670912 | DRAFT_01580 | Product_name   |        | hypothetical protein                               |          |
| 2558670912 | DRAFT_01580 | Scaffold       |        | DRAFT_contig_70_531_len_11320_read_count_197274.45 |          |
| 2558670912 | DRAFT_01580 | Coordinates    |        | 1413..1535(+)                                      |          |
| 2558670912 | DRAFT_01580 | DNA_length     |        | 123bp                                              |          |
| 2558670912 | DRAFT_01580 | Protein_length |        | 40aa                                               |          |
| 2558670912 | DRAFT_01580 | GC             |        |                                                    | 0.5      |
|            |             |                |        |                                                    |          |
| 2558670913 | DRAFT_01581 | pfam04307      | DUF457 |                                                    | 5.80E-14 |



|            |             |                |         |                                                             |          |
|------------|-------------|----------------|---------|-------------------------------------------------------------|----------|
| 2558670913 | DRAFT_01581 | Locus_type     |         | CDS                                                         |          |
| 2558670913 | DRAFT_01581 | Product_name   |         | Predicted membrane-bound metal-dependent hydrolase (DUF457) |          |
| 2558670913 | DRAFT_01581 | Scaffold       |         | DRAFT_contig_70_531_len_11320_read_count_197274.45          |          |
| 2558670913 | DRAFT_01581 | Coordinates    |         | 1815..2720(+)                                               |          |
| 2558670913 | DRAFT_01581 | DNA_length     |         | 906bp                                                       |          |
| 2558670913 | DRAFT_01581 | Protein_length |         | 301aa                                                       |          |
| 2558670913 | DRAFT_01581 | GC             |         |                                                             | 0.51     |
| 2558670913 | DRAFT_01581 | Transmembrane  |         | Yes                                                         |          |
|            |             |                |         |                                                             |          |
| 2558670914 | DRAFT_01582 | Locus_type     |         | CDS                                                         |          |
| 2558670914 | DRAFT_01582 | Product_name   |         | hypothetical protein                                        |          |
| 2558670914 | DRAFT_01582 | Scaffold       |         | DRAFT_contig_70_531_len_11320_read_count_197274.45          |          |
| 2558670914 | DRAFT_01582 | Coordinates    |         | 2835..3308(-)                                               |          |
| 2558670914 | DRAFT_01582 | DNA_length     |         | 474bp                                                       |          |
| 2558670914 | DRAFT_01582 | Protein_length |         | 157aa                                                       |          |
| 2558670914 | DRAFT_01582 | GC             |         |                                                             | 0.46     |
| 2558670914 | DRAFT_01582 | Transmembrane  |         | Yes                                                         |          |
|            |             |                |         |                                                             |          |
| 2558670915 | DRAFT_01583 | Locus_type     |         | CDS                                                         |          |
| 2558670915 | DRAFT_01583 | Product_name   |         | hypothetical protein                                        |          |
| 2558670915 | DRAFT_01583 | Scaffold       |         | DRAFT_contig_70_531_len_11320_read_count_197274.45          |          |
| 2558670915 | DRAFT_01583 | Coordinates    |         | 3317..3532(+)                                               |          |
| 2558670915 | DRAFT_01583 | DNA_length     |         | 216bp                                                       |          |
| 2558670915 | DRAFT_01583 | Protein_length |         | 71aa                                                        |          |
| 2558670915 | DRAFT_01583 | GC             |         |                                                             | 0.53     |
|            |             |                |         |                                                             |          |
| 2558670916 | DRAFT_01584 | pfam11177      | DUF2964 |                                                             | 1.40E-04 |
| 2558670916 | DRAFT_01584 | Locus_type     |         | CDS                                                         |          |
| 2558670916 | DRAFT_01584 | Product_name   |         | Protein of unknown function (DUF2964)                       |          |
| 2558670916 | DRAFT_01584 | Scaffold       |         | DRAFT_contig_70_531_len_11320_read_count_197274.45          |          |
| 2558670916 | DRAFT_01584 | Coordinates    |         | 3635..4570(+)                                               |          |
| 2558670916 | DRAFT_01584 | DNA_length     |         | 936bp                                                       |          |
| 2558670916 | DRAFT_01584 | Protein_length |         | 311aa                                                       |          |
| 2558670916 | DRAFT_01584 | GC             |         |                                                             | 0.61     |

|            |             |                |                                                                    |          |
|------------|-------------|----------------|--------------------------------------------------------------------|----------|
| 2558670916 | DRAFT_01584 | Transmembrane  | Yes                                                                |          |
| 2558670917 | DRAFT_01585 | Locus_type     | CDS                                                                |          |
| 2558670917 | DRAFT_01585 | Product_name   | hypothetical protein                                               |          |
| 2558670917 | DRAFT_01585 | Scaffold       | DRAFT_contig_70_531_len_11320_read_count_197274.45                 |          |
| 2558670917 | DRAFT_01585 | Coordinates    | 4866..5174(-)                                                      |          |
| 2558670917 | DRAFT_01585 | DNA_length     | 309bp                                                              |          |
| 2558670917 | DRAFT_01585 | Protein_length | 102aa                                                              |          |
| 2558670917 | DRAFT_01585 | GC             |                                                                    | 0.56     |
| 2558670918 | DRAFT_01586 | COG_category   | [C] Energy production and conversion                               |          |
| 2558670918 | DRAFT_01586 | COG0667        | Predicted oxidoreductases (related to aryl-alcohol dehydrogenases) | 2.00E-88 |
| 2558670918 | DRAFT_01586 | pfam00248      | Aldo_ket_red                                                       | 2.50E-79 |
| 2558670918 | DRAFT_01586 | EC:1.1.1.91    | Aryl-alcohol dehydrogenase (NADP(+)).                              |          |
| 2558670918 | DRAFT_01586 | KO:K05882      | aryl-alcohol dehydrogenase (NADP+) [EC:1.1.1.91]                   | 0.00E+00 |
| 2558670918 | DRAFT_01586 | Locus_type     | CDS                                                                |          |
| 2558670918 | DRAFT_01586 | Product_name   | Predicted oxidoreductases (related to aryl-alcohol dehydrogenases) |          |
| 2558670918 | DRAFT_01586 | Scaffold       | DRAFT_contig_70_531_len_11320_read_count_197274.45                 |          |
| 2558670918 | DRAFT_01586 | Coordinates    | 5332..6315(+)                                                      |          |
| 2558670918 | DRAFT_01586 | DNA_length     | 984bp                                                              |          |
| 2558670918 | DRAFT_01586 | Protein_length | 327aa                                                              |          |
| 2558670918 | DRAFT_01586 | GC             |                                                                    | 0.59     |
| 2558670919 | DRAFT_01587 | COG_category   | [G] Carbohydrate transport and metabolism                          |          |
| 2558670919 | DRAFT_01587 | COG_category   | [M] Cell wall/membrane/envelope biogenesis                         |          |
| 2558670919 | DRAFT_01587 | COG0451        | Nucleoside-diphosphate-sugar epimerases                            | 1.00E-39 |
| 2558670919 | DRAFT_01587 | pfam01370      | Epimerase                                                          | 3.50E-37 |
| 2558670919 | DRAFT_01587 | Locus_type     | CDS                                                                |          |
| 2558670919 | DRAFT_01587 | Product_name   | Nucleoside-diphosphate-sugar epimerases                            |          |
| 2558670919 | DRAFT_01587 | Scaffold       | DRAFT_contig_70_531_len_11320_read_count_197274.45                 |          |
| 2558670919 | DRAFT_01587 | Coordinates    | 6502..7590(-)                                                      |          |
| 2558670919 | DRAFT_01587 | DNA_length     | 1089bp                                                             |          |
| 2558670919 | DRAFT_01587 | Protein_length | 362aa                                                              |          |
| 2558670919 | DRAFT_01587 | GC             |                                                                    | 0.57     |

|            |             |                |                                                             |                                                                         |           |
|------------|-------------|----------------|-------------------------------------------------------------|-------------------------------------------------------------------------|-----------|
| 2558670920 | DRAFT_01588 | pfam13231      | PMT_2                                                       |                                                                         | 2.60E-10  |
| 2558670920 | DRAFT_01588 | Locus_type     |                                                             | CDS                                                                     |           |
| 2558670920 | DRAFT_01588 | Product_name   |                                                             | 4-amino-4-deoxy-L-arabinose transferase and related glycosyltransferase |           |
| 2558670920 | DRAFT_01588 | Scaffold       |                                                             | DRAFT_contig_70_531_len_11320_read_count_197274.45                      |           |
| 2558670920 | DRAFT_01588 | Coordinates    |                                                             | 7803..9206(-)                                                           |           |
| 2558670920 | DRAFT_01588 | DNA_length     |                                                             | 1404bp                                                                  |           |
| 2558670920 | DRAFT_01588 | Protein_length |                                                             | 467aa                                                                   |           |
| 2558670920 | DRAFT_01588 | GC             |                                                             |                                                                         | 0.56      |
| 2558670920 | DRAFT_01588 | Transmembrane  |                                                             | Yes                                                                     |           |
| 2558670921 | DRAFT_01589 | KEGG_module    | M00248: Putative antibiotic transport system                |                                                                         |           |
| 2558670921 | DRAFT_01589 | COG_category   | [V] Defense mechanisms                                      |                                                                         |           |
| 2558670921 | DRAFT_01589 | COG0842        | ABC-type multidrug transport system, permease component     |                                                                         | 2.00E-05  |
| 2558670921 | DRAFT_01589 | pfam01061      | ABC2_membrane                                               |                                                                         | 6.60E-27  |
| 2558670921 | DRAFT_01589 | TIGR00025      | ABC transporter efflux protein, DrrB family                 |                                                                         | 1.90E-21  |
| 2558670921 | DRAFT_01589 | KO:K09686      | antibiotic transport system permease protein                |                                                                         | 4.20E-45  |
| 2558670921 | DRAFT_01589 | Locus_type     |                                                             | CDS                                                                     |           |
| 2558670921 | DRAFT_01589 | Product_name   |                                                             | ABC-type multidrug transport system, permease component                 |           |
| 2558670921 | DRAFT_01589 | Scaffold       |                                                             | DRAFT_contig_70_531_len_11320_read_count_197274.45                      |           |
| 2558670921 | DRAFT_01589 | Coordinates    |                                                             | 9456..10286(-)                                                          |           |
| 2558670921 | DRAFT_01589 | DNA_length     |                                                             | 831bp                                                                   |           |
| 2558670921 | DRAFT_01589 | Protein_length |                                                             | 276aa                                                                   |           |
| 2558670921 | DRAFT_01589 | GC             |                                                             |                                                                         | 0.62      |
| 2558670921 | DRAFT_01589 | Transmembrane  |                                                             | Yes                                                                     |           |
| 2558670922 | DRAFT_01590 | KEGG_module    | M00248: Putative antibiotic transport system                |                                                                         |           |
| 2558670922 | DRAFT_01590 | COG_category   | [V] Defense mechanisms                                      |                                                                         |           |
| 2558670922 | DRAFT_01590 | COG1131        | ABC-type multidrug transport system, ATPase component       |                                                                         | 1.00E-76  |
| 2558670922 | DRAFT_01590 | pfam13732      | DUF4162                                                     |                                                                         | 1.60E-07  |
| 2558670922 | DRAFT_01590 | pfam00005      | ABC_tran                                                    |                                                                         | 2.90E-29  |
| 2558670922 | DRAFT_01590 | TIGR01188      | daunorubicin resistance ABC transporter ATP-binding subunit |                                                                         | 1.30E-109 |
| 2558670922 | DRAFT_01590 | KO:K09687      | antibiotic transport system ATP-binding protein             |                                                                         | 0.00E+00  |
| 2558670922 | DRAFT_01590 | Locus_type     |                                                             | CDS                                                                     |           |

|            |             |                |                                                                  |          |
|------------|-------------|----------------|------------------------------------------------------------------|----------|
| 2558670922 | DRAFT_01590 | Product_name   | daunorubicin resistance ABC transporter ATP-binding subunit      |          |
| 2558670922 | DRAFT_01590 | Scaffold       | DRAFT_contig_70_531_len_11320_read_count_197274.45               |          |
| 2558670922 | DRAFT_01590 | Coordinates    | 10289..11317(-)                                                  |          |
| 2558670922 | DRAFT_01590 | DNA_length     | 1029bp                                                           |          |
| 2558670922 | DRAFT_01590 | Protein_length | 342aa                                                            |          |
| 2558670922 | DRAFT_01590 | GC             |                                                                  | 0.62     |
|            |             |                |                                                                  |          |
| 2558670923 | DRAFT_01591 | Locus_type     | CDS                                                              |          |
| 2558670923 | DRAFT_01591 | Product_name   | hypothetical protein                                             |          |
| 2558670923 | DRAFT_01591 | Scaffold       | DRAFT_contig_70_538_len_11243_read_count_219486.46               |          |
| 2558670923 | DRAFT_01591 | Coordinates    | 160..627(+)                                                      |          |
| 2558670923 | DRAFT_01591 | DNA_length     | 468bp                                                            |          |
| 2558670923 | DRAFT_01591 | Protein_length | 155aa                                                            |          |
| 2558670923 | DRAFT_01591 | GC             |                                                                  | 0.54     |
|            |             |                |                                                                  |          |
| 2558670924 | DRAFT_01592 | COG_category   | [Q] Secondary metabolites biosynthesis, transport and catabolism |          |
| 2558670924 | DRAFT_01592 | COG1228        | Imidazolonepropionase and related amidohydrolases                | 2.00E-44 |
| 2558670924 | DRAFT_01592 | pfam01979      | Amidohydro_1                                                     | 6.90E-27 |
| 2558670924 | DRAFT_01592 | Locus_type     | CDS                                                              |          |
| 2558670924 | DRAFT_01592 | Product_name   | Imidazolonepropionase and related amidohydrolases                |          |
| 2558670924 | DRAFT_01592 | Scaffold       | DRAFT_contig_70_538_len_11243_read_count_219486.46               |          |
| 2558670924 | DRAFT_01592 | Coordinates    | 1006..2217(-)                                                    |          |
| 2558670924 | DRAFT_01592 | DNA_length     | 1212bp                                                           |          |
| 2558670924 | DRAFT_01592 | Protein_length | 403aa                                                            |          |
| 2558670924 | DRAFT_01592 | GC             |                                                                  | 0.61     |
|            |             |                |                                                                  |          |
| 2558670925 | DRAFT_01593 | Locus_type     | CDS                                                              |          |
| 2558670925 | DRAFT_01593 | Product_name   | hypothetical protein                                             |          |
| 2558670925 | DRAFT_01593 | Scaffold       | DRAFT_contig_70_538_len_11243_read_count_219486.46               |          |
| 2558670925 | DRAFT_01593 | Coordinates    | 2378..5122(+)                                                    |          |
| 2558670925 | DRAFT_01593 | DNA_length     | 2745bp                                                           |          |
| 2558670925 | DRAFT_01593 | Protein_length | 914aa                                                            |          |
| 2558670925 | DRAFT_01593 | GC             |                                                                  | 0.6      |
| 2558670925 | DRAFT_01593 | Transmembrane  | Yes                                                              |          |

|            |             |                |                                                                 |          |
|------------|-------------|----------------|-----------------------------------------------------------------|----------|
| 2558670926 | DRAFT_01594 | Locus_type     | CDS                                                             |          |
| 2558670926 | DRAFT_01594 | Product_name   | hypothetical protein                                            |          |
| 2558670926 | DRAFT_01594 | Scaffold       | DRAFT_contig_70_538_len_11243_read_count_219486.46              |          |
| 2558670926 | DRAFT_01594 | Coordinates    | 5134..5421(-)                                                   |          |
| 2558670926 | DRAFT_01594 | DNA_length     | 288bp                                                           |          |
| 2558670926 | DRAFT_01594 | Protein_length | 95aa                                                            |          |
| 2558670926 | DRAFT_01594 | GC             |                                                                 | 0.57     |
| 2558670926 | DRAFT_01594 | Transmembrane  | Yes                                                             |          |
|            |             |                |                                                                 |          |
| 2558670927 | DRAFT_01595 | COG_category   | [R] General function prediction only                            |          |
| 2558670927 | DRAFT_01595 | COG_category   | [E] Amino acid transport and metabolism                         |          |
| 2558670927 | DRAFT_01595 | COG1387        | Histidinol phosphatase and related hydrolases of the PHP family | 6.00E-14 |
| 2558670927 | DRAFT_01595 | pfam02811      | PHP                                                             | 7.90E-05 |
| 2558670927 | DRAFT_01595 | TIGR01856      | histidinol phosphate phosphatase, HisJ family                   | 6.40E-19 |
| 2558670927 | DRAFT_01595 | Locus_type     | CDS                                                             |          |
| 2558670927 | DRAFT_01595 | Product_name   | Histidinol phosphatase and related hydrolases of the PHP family |          |
| 2558670927 | DRAFT_01595 | Scaffold       | DRAFT_contig_70_538_len_11243_read_count_219486.46              |          |
| 2558670927 | DRAFT_01595 | Coordinates    | 5510..6280(-)                                                   |          |
| 2558670927 | DRAFT_01595 | DNA_length     | 771bp                                                           |          |
| 2558670927 | DRAFT_01595 | Protein_length | 256aa                                                           |          |
| 2558670927 | DRAFT_01595 | GC             |                                                                 | 0.52     |
|            |             |                |                                                                 |          |
| 2558670928 | DRAFT_01596 | Locus_type     | CDS                                                             |          |
| 2558670928 | DRAFT_01596 | Product_name   | hypothetical protein                                            |          |
| 2558670928 | DRAFT_01596 | Scaffold       | DRAFT_contig_70_538_len_11243_read_count_219486.46              |          |
| 2558670928 | DRAFT_01596 | Coordinates    | 6302..6460(-)                                                   |          |
| 2558670928 | DRAFT_01596 | DNA_length     | 159bp                                                           |          |
| 2558670928 | DRAFT_01596 | Protein_length | 52aa                                                            |          |
| 2558670928 | DRAFT_01596 | GC             |                                                                 | 0.54     |
|            |             |                |                                                                 |          |
| 2558670929 | DRAFT_01597 | Locus_type     | CDS                                                             |          |
| 2558670929 | DRAFT_01597 | Product_name   | hypothetical protein                                            |          |
| 2558670929 | DRAFT_01597 | Scaffold       | DRAFT_contig_70_538_len_11243_read_count_219486.46              |          |

|            |             |                |                                                    |          |
|------------|-------------|----------------|----------------------------------------------------|----------|
| 2558670929 | DRAFT_01597 | Coordinates    | 6525..6668(-)                                      |          |
| 2558670929 | DRAFT_01597 | DNA_length     | 144bp                                              |          |
| 2558670929 | DRAFT_01597 | Protein_length | 47aa                                               |          |
| 2558670929 | DRAFT_01597 | GC             |                                                    | 0.43     |
| 2558670930 | DRAFT_01598 | pfam13847      | Methyltransf_31                                    | 5.90E-08 |
| 2558670930 | DRAFT_01598 | Locus_type     | CDS                                                |          |
| 2558670930 | DRAFT_01598 | Product_name   | Methyltransferase domain                           |          |
| 2558670930 | DRAFT_01598 | Scaffold       | DRAFT_contig_70_538_len_11243_read_count_219486.46 |          |
| 2558670930 | DRAFT_01598 | Coordinates    | 6976..7296(-)                                      |          |
| 2558670930 | DRAFT_01598 | DNA_length     | 321bp                                              |          |
| 2558670930 | DRAFT_01598 | Protein_length | 106aa                                              |          |
| 2558670930 | DRAFT_01598 | GC             |                                                    | 0.53     |
| 2558670931 | DRAFT_01599 | Locus_type     | CDS                                                |          |
| 2558670931 | DRAFT_01599 | Product_name   | hypothetical protein                               |          |
| 2558670931 | DRAFT_01599 | Scaffold       | DRAFT_contig_70_538_len_11243_read_count_219486.46 |          |
| 2558670931 | DRAFT_01599 | Coordinates    | 7323..8084(+)                                      |          |
| 2558670931 | DRAFT_01599 | DNA_length     | 762bp                                              |          |
| 2558670931 | DRAFT_01599 | Protein_length | 253aa                                              |          |
| 2558670931 | DRAFT_01599 | GC             |                                                    | 0.5      |
| 2558670931 | DRAFT_01599 | Transmembrane  | Yes                                                |          |
| 2558670932 | DRAFT_01600 | Locus_type     | CDS                                                |          |
| 2558670932 | DRAFT_01600 | Product_name   | hypothetical protein                               |          |
| 2558670932 | DRAFT_01600 | Scaffold       | DRAFT_contig_70_538_len_11243_read_count_219486.46 |          |
| 2558670932 | DRAFT_01600 | Coordinates    | 8110..8547(-)                                      |          |
| 2558670932 | DRAFT_01600 | DNA_length     | 438bp                                              |          |
| 2558670932 | DRAFT_01600 | Protein_length | 145aa                                              |          |
| 2558670932 | DRAFT_01600 | GC             |                                                    | 0.53     |
| 2558670932 | DRAFT_01600 | Transmembrane  | Yes                                                |          |
| 2558670933 | DRAFT_01601 | Locus_type     | CDS                                                |          |
| 2558670933 | DRAFT_01601 | Product_name   | hypothetical protein                               |          |

|            |             |                |                                                           |          |
|------------|-------------|----------------|-----------------------------------------------------------|----------|
| 2558670933 | DRAFT_01601 | Scaffold       | DRAFT_contig_70_538_len_11243_read_count_219486.46        |          |
| 2558670933 | DRAFT_01601 | Coordinates    | 8924..9526(+)                                             |          |
| 2558670933 | DRAFT_01601 | DNA_length     | 603bp                                                     |          |
| 2558670933 | DRAFT_01601 | Protein_length | 200aa                                                     |          |
| 2558670933 | DRAFT_01601 | GC             |                                                           | 0.49     |
| 2558670933 | DRAFT_01601 | Transmembrane  | Yes                                                       |          |
|            |             |                |                                                           |          |
| 2558670934 | DRAFT_01602 | Locus_type     | CDS                                                       |          |
| 2558670934 | DRAFT_01602 | Product_name   | hypothetical protein                                      |          |
| 2558670934 | DRAFT_01602 | Scaffold       | DRAFT_contig_70_538_len_11243_read_count_219486.46        |          |
| 2558670934 | DRAFT_01602 | Coordinates    | 10131..10349(-)                                           |          |
| 2558670934 | DRAFT_01602 | DNA_length     | 219bp                                                     |          |
| 2558670934 | DRAFT_01602 | Protein_length | 72aa                                                      |          |
| 2558670934 | DRAFT_01602 | GC             |                                                           | 0.52     |
| 2558670934 | DRAFT_01602 | Transmembrane  | Yes                                                       |          |
|            |             |                |                                                           |          |
| 2558670935 | DRAFT_01603 | KEGG_module    | M00135: GABA biosynthesis, eukaryotes, putrescine => GABA |          |
| 2558670935 | DRAFT_01603 | Metacyc        | PWY-0: putrescine degradation III                         |          |
| 2558670935 | DRAFT_01603 | Metacyc        | PWY-6117: spermine and spermidine degradation I           |          |
| 2558670935 | DRAFT_01603 | pfam00583      | Acetyltransf_1                                            | 2.20E-13 |
| 2558670935 | DRAFT_01603 | EC:2.3.1.57    | Diamine N-acetyltransferase.                              |          |
| 2558670935 | DRAFT_01603 | KO:K00657      | diamine N-acetyltransferase [EC:2.3.1.57]                 | 5.40E-29 |
| 2558670935 | DRAFT_01603 | Locus_type     | CDS                                                       |          |
| 2558670935 | DRAFT_01603 | Product_name   | Acetyltransferases                                        |          |
| 2558670935 | DRAFT_01603 | Scaffold       | DRAFT_contig_70_538_len_11243_read_count_219486.46        |          |
| 2558670935 | DRAFT_01603 | Coordinates    | 10477..10977(-)                                           |          |
| 2558670935 | DRAFT_01603 | DNA_length     | 501bp                                                     |          |
| 2558670935 | DRAFT_01603 | Protein_length | 166aa                                                     |          |
| 2558670935 | DRAFT_01603 | GC             |                                                           | 0.51     |
|            |             |                |                                                           |          |
| 2558670936 | DRAFT_01604 | Locus_type     | CDS                                                       |          |
| 2558670936 | DRAFT_01604 | Product_name   | hypothetical protein                                      |          |
| 2558670936 | DRAFT_01604 | Scaffold       | DRAFT_contig_70_589_len_10771_read_count_176040.47        |          |
| 2558670936 | DRAFT_01604 | Coordinates    | 2..331(-)                                                 |          |

|            |             |                |                                                    |          |
|------------|-------------|----------------|----------------------------------------------------|----------|
| 2558670936 | DRAFT_01604 | DNA_length     | 330bp                                              |          |
| 2558670936 | DRAFT_01604 | Protein_length | 110aa                                              |          |
| 2558670936 | DRAFT_01604 | GC             |                                                    | 0.57     |
| 2558670936 | DRAFT_01604 | Transmembrane  | Yes                                                |          |
| 2558670937 | DRAFT_01605 | IMG_pathway    | 433: Archaeal nucleoid proteins                    |          |
| 2558670937 | DRAFT_01605 | COG_category   | [K] Transcription                                  |          |
| 2558670937 | DRAFT_01605 | COG1581        | Archaeal DNA-binding protein                       | 6.00E-21 |
| 2558670937 | DRAFT_01605 | pfam01918      | Alba                                               | 1.50E-18 |
| 2558670937 | DRAFT_01605 | TIGR00285      | DNA-binding protein Alba                           | 3.20E-39 |
| 2558670937 | DRAFT_01605 | KO:K03622      | archaea-specific DNA-binding protein               | 2.70E-21 |
| 2558670937 | DRAFT_01605 | ITERM:00143    | nucleoid protein Alba                              |          |
| 2558670937 | DRAFT_01605 | Locus_type     | CDS                                                |          |
| 2558670937 | DRAFT_01605 | Product_name   | nucleoid protein Alba                              |          |
| 2558670937 | DRAFT_01605 | Scaffold       | DRAFT_contig_70_589_len_10771_read_count_176040.47 |          |
| 2558670937 | DRAFT_01605 | Coordinates    | 692..988(-)                                        |          |
| 2558670937 | DRAFT_01605 | DNA_length     | 297bp                                              |          |
| 2558670937 | DRAFT_01605 | Protein_length | 98aa                                               |          |
| 2558670937 | DRAFT_01605 | GC             |                                                    | 0.52     |
| 2558670938 | DRAFT_01606 | Locus_type     | CDS                                                |          |
| 2558670938 | DRAFT_01606 | Product_name   | hypothetical protein                               |          |
| 2558670938 | DRAFT_01606 | Scaffold       | DRAFT_contig_70_589_len_10771_read_count_176040.47 |          |
| 2558670938 | DRAFT_01606 | Coordinates    | 1261..1440(-)                                      |          |
| 2558670938 | DRAFT_01606 | DNA_length     | 180bp                                              |          |
| 2558670938 | DRAFT_01606 | Protein_length | 59aa                                               |          |
| 2558670938 | DRAFT_01606 | GC             |                                                    | 0.52     |
| 2558670939 | DRAFT_01607 | COG_category   | [L] Replication, recombination and repair          |          |
| 2558670939 | DRAFT_01607 | COG3316        | Transposase and inactivated derivatives            | 3.00E-09 |
| 2558670939 | DRAFT_01607 | pfam13610      | DDE_Tnp_IS240                                      | 5.50E-16 |
| 2558670939 | DRAFT_01607 | Locus_type     | CDS                                                |          |
| 2558670939 | DRAFT_01607 | Product_name   | Transposase and inactivated derivatives            |          |
| 2558670939 | DRAFT_01607 | Scaffold       | DRAFT_contig_70_589_len_10771_read_count_176040.47 |          |



|            |             |                |                                                                                |          |
|------------|-------------|----------------|--------------------------------------------------------------------------------|----------|
| 2558670939 | DRAFT_01607 | Coordinates    | 1622..2782(+)                                                                  |          |
| 2558670939 | DRAFT_01607 | DNA_length     | 1161bp                                                                         |          |
| 2558670939 | DRAFT_01607 | Protein_length | 386aa                                                                          |          |
| 2558670939 | DRAFT_01607 | GC             |                                                                                | 0.55     |
| 2558670940 | DRAFT_01608 | Locus_type     | CDS                                                                            |          |
| 2558670940 | DRAFT_01608 | Product_name   | hypothetical protein                                                           |          |
| 2558670940 | DRAFT_01608 | Scaffold       | DRAFT_contig_70_589_len_10771_read_count_176040.47                             |          |
| 2558670940 | DRAFT_01608 | Coordinates    | 2808..3026(+)                                                                  |          |
| 2558670940 | DRAFT_01608 | DNA_length     | 219bp                                                                          |          |
| 2558670940 | DRAFT_01608 | Protein_length | 72aa                                                                           |          |
| 2558670940 | DRAFT_01608 | GC             |                                                                                | 0.57     |
| 2558670941 | DRAFT_01609 | KEGG_module    | M00374: Dicarboxylate-hydroxybutyrate cycle                                    |          |
| 2558670941 | DRAFT_01609 | KEGG_module    | M00173: Reductive citric acid cycle (Arnon-Buchanan cycle)                     |          |
| 2558670941 | DRAFT_01609 | KEGG_module    | M00009: Citrate cycle (TCA cycle, Krebs cycle)                                 |          |
| 2558670941 | DRAFT_01609 | KEGG_module    | M00011: Citrate cycle, second carbon oxidation, 2-oxoglutarate => oxaloacetate |          |
| 2558670941 | DRAFT_01609 | Metacyc        | PWY-5538: pyruvate fermentation to acetate VI                                  |          |
| 2558670941 | DRAFT_01609 | Metacyc        | PWY-5392: reductive TCA cycle II                                               |          |
| 2558670941 | DRAFT_01609 | Metacyc        | PWY-5913: TCA cycle VI (obligate autotrophs)                                   |          |
| 2558670941 | DRAFT_01609 | Metacyc        | P23-PWY: reductive TCA cycle I                                                 |          |
| 2558670941 | DRAFT_01609 | Metacyc        | PWY-6728: methylaspartate cycle                                                |          |
| 2558670941 | DRAFT_01609 | Metacyc        | PWY-5537: pyruvate fermentation to acetate V                                   |          |
| 2558670941 | DRAFT_01609 | Metacyc        | P42-PWY: incomplete reductive TCA cycle                                        |          |
| 2558670941 | DRAFT_01609 | Metacyc        | PWY-5690: TCA cycle II (eukaryotic)                                            |          |
| 2558670941 | DRAFT_01609 | Metacyc        | PWY-6969: TCA cycle V (2-oxoglutarate:ferredoxin oxidoreductase)               |          |
| 2558670941 | DRAFT_01609 | Metacyc        | TCA: TCA cycle I (prokaryotic)                                                 |          |
| 2558670941 | DRAFT_01609 | COG_category   | [C] Energy production and conversion                                           |          |
| 2558670941 | DRAFT_01609 | COG0045        | Succinyl-CoA synthetase, beta subunit                                          | 8.00E-88 |
| 2558670941 | DRAFT_01609 | pfam08442      | ATP-grasp_2                                                                    | 1.90E-41 |
| 2558670941 | DRAFT_01609 | pfam00549      | Ligase_CoA                                                                     | 3.60E-06 |
| 2558670941 | DRAFT_01609 | EC:6.2.1.5     | Succinate--CoA ligase (ADP-forming).                                           |          |
| 2558670941 | DRAFT_01609 | TIGR01016      | succinyl-CoA synthetase, beta subunit                                          | 4.60E-99 |
| 2558670941 | DRAFT_01609 | KO:K01903      | succinyl-CoA synthetase beta subunit [EC:6.2.1.5]                              | 0.00E+00 |

|            |             |                |                                                                                |           |
|------------|-------------|----------------|--------------------------------------------------------------------------------|-----------|
| 2558670941 | DRAFT_01609 | Locus_type     | CDS                                                                            |           |
| 2558670941 | DRAFT_01609 | Product_name   | Succinyl-CoA synthetase, beta subunit                                          |           |
| 2558670941 | DRAFT_01609 | Scaffold       | DRAFT_contig_70_589_len_10771_read_count_176040.47                             |           |
| 2558670941 | DRAFT_01609 | Coordinates    | 3214..4311(+)                                                                  |           |
| 2558670941 | DRAFT_01609 | DNA_length     | 1098bp                                                                         |           |
| 2558670941 | DRAFT_01609 | Protein_length | 365aa                                                                          |           |
| 2558670941 | DRAFT_01609 | GC             |                                                                                | 0.6       |
|            |             |                |                                                                                |           |
| 2558670942 | DRAFT_01610 | KEGG_module    | M00009: Citrate cycle (TCA cycle, Krebs cycle)                                 |           |
| 2558670942 | DRAFT_01610 | KEGG_module    | M00173: Reductive citric acid cycle (Arnon-Buchanan cycle)                     |           |
| 2558670942 | DRAFT_01610 | KEGG_module    | M00011: Citrate cycle, second carbon oxidation, 2-oxoglutarate => oxaloacetate |           |
| 2558670942 | DRAFT_01610 | KEGG_module    | M00374: Dicarboxylate-hydroxybutyrate cycle                                    |           |
| 2558670942 | DRAFT_01610 | Metacyc        | TCA: TCA cycle I (prokaryotic)                                                 |           |
| 2558670942 | DRAFT_01610 | Metacyc        | PWY-5690: TCA cycle II (eukaryotic)                                            |           |
| 2558670942 | DRAFT_01610 | Metacyc        | PWY-5392: reductive TCA cycle II                                               |           |
| 2558670942 | DRAFT_01610 | Metacyc        | PWY-6969: TCA cycle V (2-oxoglutarate:ferredoxin oxidoreductase)               |           |
| 2558670942 | DRAFT_01610 | Metacyc        | PWY-6728: methylaspartate cycle                                                |           |
| 2558670942 | DRAFT_01610 | Metacyc        | PWY-5537: pyruvate fermentation to acetate V                                   |           |
| 2558670942 | DRAFT_01610 | Metacyc        | PWY-5913: TCA cycle VI (obligate autotrophs)                                   |           |
| 2558670942 | DRAFT_01610 | Metacyc        | P23-PWY: reductive TCA cycle I                                                 |           |
| 2558670942 | DRAFT_01610 | Metacyc        | P42-PWY: incomplete reductive TCA cycle                                        |           |
| 2558670942 | DRAFT_01610 | Metacyc        | PWY-5538: pyruvate fermentation to acetate VI                                  |           |
| 2558670942 | DRAFT_01610 | COG_category   | [C] Energy production and conversion                                           |           |
| 2558670942 | DRAFT_01610 | COG0074        | Succinyl-CoA synthetase, alpha subunit                                         | 4.00E-88  |
| 2558670942 | DRAFT_01610 | pfam02629      | CoA_binding                                                                    | 2.30E-20  |
| 2558670942 | DRAFT_01610 | pfam13607      | Succ_CoA_lig                                                                   | 8.80E-11  |
| 2558670942 | DRAFT_01610 | EC:6.2.1.5     | Succinate--CoA ligase (ADP-forming).                                           |           |
| 2558670942 | DRAFT_01610 | TIGR01019      | succinyl-CoA synthetase, alpha subunit                                         | 2.80E-108 |
| 2558670942 | DRAFT_01610 | KO:K01902      | succinyl-CoA synthetase alpha subunit [EC:6.2.1.5]                             | 0.00E+00  |
| 2558670942 | DRAFT_01610 | Locus_type     | CDS                                                                            |           |
| 2558670942 | DRAFT_01610 | Product_name   | succinyl-CoA synthetase (ADP-forming) alpha subunit (EC 6.2.1.5)               |           |
| 2558670942 | DRAFT_01610 | Scaffold       | DRAFT_contig_70_589_len_10771_read_count_176040.47                             |           |
| 2558670942 | DRAFT_01610 | Coordinates    | 4311..5180(+)                                                                  |           |
| 2558670942 | DRAFT_01610 | DNA_length     | 870bp                                                                          |           |

|            |             |                |                                                     |          |
|------------|-------------|----------------|-----------------------------------------------------|----------|
| 2558670942 | DRAFT_01610 | Protein_length | 289aa                                               |          |
| 2558670942 | DRAFT_01610 | GC             |                                                     | 0.62     |
| 2558670943 | DRAFT_01611 | KEGG_module    | M00177: Ribosome, eukaryotes                        |          |
| 2558670943 | DRAFT_01611 | KEGG_module    | M00179: Ribosome, archaea                           |          |
| 2558670943 | DRAFT_01611 | COG_category   | [J] Translation, ribosomal structure and biogenesis |          |
| 2558670943 | DRAFT_01611 | COG1552        | Ribosomal protein L40E                              | 3.00E-04 |
| 2558670943 | DRAFT_01611 | KO:K02927      | large subunit ribosomal protein L40e                | 5.60E-16 |
| 2558670943 | DRAFT_01611 | Locus_type     | CDS                                                 |          |
| 2558670943 | DRAFT_01611 | Product_name   | Ribosomal protein L40E                              |          |
| 2558670943 | DRAFT_01611 | Scaffold       | DRAFT_contig_70_589_len_10771_read_count_176040.47  |          |
| 2558670943 | DRAFT_01611 | Coordinates    | 5251..5418(+)                                       |          |
| 2558670943 | DRAFT_01611 | DNA_length     | 168bp                                               |          |
| 2558670943 | DRAFT_01611 | Protein_length | 55aa                                                |          |
| 2558670943 | DRAFT_01611 | GC             |                                                     | 0.56     |
| 2558670944 | DRAFT_01612 | Locus_type     | tRNA                                                |          |
| 2558670944 | DRAFT_01612 | Product_name   | tRNA_Undet_???                                      |          |
| 2558670944 | DRAFT_01612 | Scaffold       | DRAFT_contig_70_589_len_10771_read_count_176040.47  |          |
| 2558670944 | DRAFT_01612 | Coordinates    | 5453..5576(+)                                       |          |
| 2558670944 | DRAFT_01612 | DNA_length     | 124bp                                               |          |
| 2558670944 | DRAFT_01612 | GC             |                                                     | 0.65     |
| 2558670945 | DRAFT_01613 | Locus_type     | CDS                                                 |          |
| 2558670945 | DRAFT_01613 | Product_name   | hypothetical protein                                |          |
| 2558670945 | DRAFT_01613 | Scaffold       | DRAFT_contig_70_589_len_10771_read_count_176040.47  |          |
| 2558670945 | DRAFT_01613 | Coordinates    | 5645..6115(+)                                       |          |
| 2558670945 | DRAFT_01613 | DNA_length     | 471bp                                               |          |
| 2558670945 | DRAFT_01613 | Protein_length | 156aa                                               |          |
| 2558670945 | DRAFT_01613 | GC             |                                                     | 0.55     |
| 2558670946 | DRAFT_01614 | Locus_type     | CDS                                                 |          |
| 2558670946 | DRAFT_01614 | Product_name   | hypothetical protein                                |          |
| 2558670946 | DRAFT_01614 | Scaffold       | DRAFT_contig_70_589_len_10771_read_count_176040.47  |          |

|            |             |                |                      |                                                    |          |
|------------|-------------|----------------|----------------------|----------------------------------------------------|----------|
| 2558670946 | DRAFT_01614 | Coordinates    |                      | 6112..6303(+)                                      |          |
| 2558670946 | DRAFT_01614 | DNA_length     |                      | 192bp                                              |          |
| 2558670946 | DRAFT_01614 | Protein_length |                      | 63aa                                               |          |
| 2558670946 | DRAFT_01614 | GC             |                      |                                                    | 0.54     |
| 2558670947 | DRAFT_01615 | pfam04055      | Radical_SAM          |                                                    | 3.00E-10 |
| 2558670947 | DRAFT_01615 | Locus_type     |                      | CDS                                                |          |
| 2558670947 | DRAFT_01615 | Product_name   |                      | DNA repair photolyase                              |          |
| 2558670947 | DRAFT_01615 | Scaffold       |                      | DRAFT_contig_70_589_len_10771_read_count_176040.47 |          |
| 2558670947 | DRAFT_01615 | Coordinates    |                      | 6315..7058(+)                                      |          |
| 2558670947 | DRAFT_01615 | DNA_length     |                      | 744bp                                              |          |
| 2558670947 | DRAFT_01615 | Protein_length |                      | 247aa                                              |          |
| 2558670947 | DRAFT_01615 | GC             |                      |                                                    | 0.52     |
| 2558670948 | DRAFT_01616 | pfam13520      | AA_permease_2        |                                                    | 2.20E-18 |
| 2558670948 | DRAFT_01616 | Locus_type     |                      | CDS                                                |          |
| 2558670948 | DRAFT_01616 | Product_name   |                      | Amino acid transporters                            |          |
| 2558670948 | DRAFT_01616 | Scaffold       |                      | DRAFT_contig_70_589_len_10771_read_count_176040.47 |          |
| 2558670948 | DRAFT_01616 | Coordinates    |                      | 7048..7560(-)                                      |          |
| 2558670948 | DRAFT_01616 | DNA_length     |                      | 513bp                                              |          |
| 2558670948 | DRAFT_01616 | Protein_length |                      | 170aa                                              |          |
| 2558670948 | DRAFT_01616 | GC             |                      |                                                    | 0.57     |
| 2558670948 | DRAFT_01616 | Transmembrane  |                      | Yes                                                |          |
| 2558670949 | DRAFT_01617 | Locus_type     |                      | CDS                                                |          |
| 2558670949 | DRAFT_01617 | Product_name   |                      | hypothetical protein                               |          |
| 2558670949 | DRAFT_01617 | Scaffold       |                      | DRAFT_contig_70_589_len_10771_read_count_176040.47 |          |
| 2558670949 | DRAFT_01617 | Coordinates    |                      | 7542..7742(-)                                      |          |
| 2558670949 | DRAFT_01617 | DNA_length     |                      | 201bp                                              |          |
| 2558670949 | DRAFT_01617 | Protein_length |                      | 66aa                                               |          |
| 2558670949 | DRAFT_01617 | GC             |                      |                                                    | 0.63     |
| 2558670949 | DRAFT_01617 | Transmembrane  |                      | Yes                                                |          |
| 2558670950 | DRAFT_01618 | COG_category   | [S] Function unknown |                                                    |          |

|            |             |                |                                                                |          |
|------------|-------------|----------------|----------------------------------------------------------------|----------|
| 2558670950 | DRAFT_01618 | COG4089        | Predicted membrane protein                                     | 1.00E-37 |
| 2558670950 | DRAFT_01618 | pfam07758      | DUF1614                                                        | 1.00E-48 |
| 2558670950 | DRAFT_01618 | Locus_type     | CDS                                                            |          |
| 2558670950 | DRAFT_01618 | Product_name   | Predicted membrane protein                                     |          |
| 2558670950 | DRAFT_01618 | Scaffold       | DRAFT_contig_70_589_len_10771_read_count_176040.47             |          |
| 2558670950 | DRAFT_01618 | Coordinates    | 7876..8577(-)                                                  |          |
| 2558670950 | DRAFT_01618 | DNA_length     | 702bp                                                          |          |
| 2558670950 | DRAFT_01618 | Protein_length | 233aa                                                          |          |
| 2558670950 | DRAFT_01618 | GC             |                                                                | 0.61     |
| 2558670950 | DRAFT_01618 | Transmembrane  | Yes                                                            |          |
| 2558670951 | DRAFT_01619 | pfam03477      | ATP-cone                                                       | 2.40E-07 |
| 2558670951 | DRAFT_01619 | Locus_type     | CDS                                                            |          |
| 2558670951 | DRAFT_01619 | Product_name   | ATP cone domain                                                |          |
| 2558670951 | DRAFT_01619 | Scaffold       | DRAFT_contig_70_589_len_10771_read_count_176040.47             |          |
| 2558670951 | DRAFT_01619 | Coordinates    | 8629..8898(-)                                                  |          |
| 2558670951 | DRAFT_01619 | DNA_length     | 270bp                                                          |          |
| 2558670951 | DRAFT_01619 | Protein_length | 89aa                                                           |          |
| 2558670951 | DRAFT_01619 | GC             |                                                                | 0.53     |
| 2558670952 | DRAFT_01620 | COG_category   | [K] Transcription                                              |          |
| 2558670952 | DRAFT_01620 | COG2101        | TATA-box binding protein (TBP), component of TFIID and TFIIB   | 3.00E-56 |
| 2558670952 | DRAFT_01620 | pfam00352      | TBP                                                            | 7.80E-29 |
| 2558670952 | DRAFT_01620 | pfam00352      | TBP                                                            | 7.50E-30 |
| 2558670952 | DRAFT_01620 | KO:K03120      | transcription initiation factor TFIID TATA-box-binding protein | 0.00E+00 |
| 2558670952 | DRAFT_01620 | ITERM:01960    | TATA binding protein of transcription factor TFIID             |          |
| 2558670952 | DRAFT_01620 | Locus_type     | CDS                                                            |          |
| 2558670952 | DRAFT_01620 | Product_name   | TATA binding protein of transcription factor TFIID             |          |
| 2558670952 | DRAFT_01620 | Scaffold       | DRAFT_contig_70_589_len_10771_read_count_176040.47             |          |
| 2558670952 | DRAFT_01620 | Coordinates    | 9698..10282(+)                                                 |          |
| 2558670952 | DRAFT_01620 | DNA_length     | 585bp                                                          |          |
| 2558670952 | DRAFT_01620 | Protein_length | 194aa                                                          |          |
| 2558670952 | DRAFT_01620 | GC             |                                                                | 0.52     |

|            |             |                |                                                            |          |
|------------|-------------|----------------|------------------------------------------------------------|----------|
| 2558670953 | DRAFT_01621 | Locus_type     | CDS                                                        |          |
| 2558670953 | DRAFT_01621 | Product_name   | hypothetical protein                                       |          |
| 2558670953 | DRAFT_01621 | Scaffold       | DRAFT_contig_70_589_len_10771_read_count_176040.47         |          |
| 2558670953 | DRAFT_01621 | Coordinates    | 10370..10645(-)                                            |          |
| 2558670953 | DRAFT_01621 | DNA_length     | 276bp                                                      |          |
| 2558670953 | DRAFT_01621 | Protein_length | 91aa                                                       |          |
| 2558670953 | DRAFT_01621 | GC             |                                                            | 0.46     |
|            |             |                |                                                            |          |
| 2558670954 | DRAFT_01622 | pfam12849      | PBP_like_2                                                 | 3.60E-35 |
| 2558670954 | DRAFT_01622 | TIGR00975      | phosphate ABC transporter, phosphate-binding protein       | 2.40E-56 |
| 2558670954 | DRAFT_01622 | Locus_type     | CDS                                                        |          |
| 2558670954 | DRAFT_01622 | Product_name   | ABC-type phosphate transport system, periplasmic component |          |
| 2558670954 | DRAFT_01622 | Scaffold       | DRAFT_contig_70_600_len_10654_read_count_197271.48         |          |
| 2558670954 | DRAFT_01622 | Coordinates    | 3..755(-)                                                  |          |
| 2558670954 | DRAFT_01622 | DNA_length     | 753bp                                                      |          |
| 2558670954 | DRAFT_01622 | Protein_length | 251aa                                                      |          |
| 2558670954 | DRAFT_01622 | GC             |                                                            | 0.55     |
| 2558670954 | DRAFT_01622 | Transmembrane  | Yes                                                        |          |
|            |             |                |                                                            |          |
| 2558670955 | DRAFT_01623 | COG_category   | [P] Inorganic ion transport and metabolism                 |          |
| 2558670955 | DRAFT_01623 | COG0704        | Phosphate uptake regulator                                 | 2.00E-24 |
| 2558670955 | DRAFT_01623 | pfam01895      | PhoU                                                       | 1.30E-16 |
| 2558670955 | DRAFT_01623 | pfam04014      | Antitoxin-MazE                                             | 1.30E-08 |
| 2558670955 | DRAFT_01623 | pfam01895      | PhoU                                                       | 5.50E-05 |
| 2558670955 | DRAFT_01623 | Locus_type     | CDS                                                        |          |
| 2558670955 | DRAFT_01623 | Product_name   | Phosphate uptake regulator                                 |          |
| 2558670955 | DRAFT_01623 | Scaffold       | DRAFT_contig_70_600_len_10654_read_count_197271.48         |          |
| 2558670955 | DRAFT_01623 | Coordinates    | 894..1904(+)                                               |          |
| 2558670955 | DRAFT_01623 | DNA_length     | 1011bp                                                     |          |
| 2558670955 | DRAFT_01623 | Protein_length | 336aa                                                      |          |
| 2558670955 | DRAFT_01623 | GC             |                                                            | 0.55     |
|            |             |                |                                                            |          |
| 2558670956 | DRAFT_01624 | Locus_type     | CDS                                                        |          |
| 2558670956 | DRAFT_01624 | Product_name   | hypothetical protein                                       |          |

|            |             |                |                                                          |          |
|------------|-------------|----------------|----------------------------------------------------------|----------|
| 2558670956 | DRAFT_01624 | Scaffold       | DRAFT_contig_70_600_len_10654_read_count_197271.48       |          |
| 2558670956 | DRAFT_01624 | Coordinates    | 1940..2248(-)                                            |          |
| 2558670956 | DRAFT_01624 | DNA_length     | 309bp                                                    |          |
| 2558670956 | DRAFT_01624 | Protein_length | 102aa                                                    |          |
| 2558670956 | DRAFT_01624 | GC             |                                                          | 0.55     |
| 2558670957 | DRAFT_01625 | KEGG_module    | M00248: Putative antibiotic transport system             |          |
| 2558670957 | DRAFT_01625 | COG_category   | [V] Defense mechanisms                                   |          |
| 2558670957 | DRAFT_01625 | COG0842        | ABC-type multidrug transport system, permease component  | 1.00E-08 |
| 2558670957 | DRAFT_01625 | pfam01061      | ABC2_membrane                                            | 5.40E-37 |
| 2558670957 | DRAFT_01625 | TIGR00025      | ABC transporter efflux protein, DrrB family              | 4.90E-20 |
| 2558670957 | DRAFT_01625 | TIGR01247      | daunorubicin resistance ABC transporter membrane protein | 6.50E-44 |
| 2558670957 | DRAFT_01625 | KO:K09686      | antibiotic transport system permease protein             | 0.00E+00 |
| 2558670957 | DRAFT_01625 | Locus_type     | CDS                                                      |          |
| 2558670957 | DRAFT_01625 | Product_name   | ABC-type multidrug transport system, permease component  |          |
| 2558670957 | DRAFT_01625 | Scaffold       | DRAFT_contig_70_600_len_10654_read_count_197271.48       |          |
| 2558670957 | DRAFT_01625 | Coordinates    | 2357..3163(-)                                            |          |
| 2558670957 | DRAFT_01625 | DNA_length     | 807bp                                                    |          |
| 2558670957 | DRAFT_01625 | Protein_length | 268aa                                                    |          |
| 2558670957 | DRAFT_01625 | GC             |                                                          | 0.57     |
| 2558670957 | DRAFT_01625 | Transmembrane  | Yes                                                      |          |
| 2558670958 | DRAFT_01626 | KEGG_module    | M00248: Putative antibiotic transport system             |          |
| 2558670958 | DRAFT_01626 | COG_category   | [V] Defense mechanisms                                   |          |
| 2558670958 | DRAFT_01626 | COG1131        | ABC-type multidrug transport system, ATPase component    | 7.00E-73 |
| 2558670958 | DRAFT_01626 | pfam00005      | ABC_tran                                                 | 3.00E-27 |
| 2558670958 | DRAFT_01626 | KO:K09687      | antibiotic transport system ATP-binding protein          | 0.00E+00 |
| 2558670958 | DRAFT_01626 | Locus_type     | CDS                                                      |          |
| 2558670958 | DRAFT_01626 | Product_name   | ABC-type multidrug transport system, ATPase component    |          |
| 2558670958 | DRAFT_01626 | Scaffold       | DRAFT_contig_70_600_len_10654_read_count_197271.48       |          |
| 2558670958 | DRAFT_01626 | Coordinates    | 3165..3959(-)                                            |          |
| 2558670958 | DRAFT_01626 | DNA_length     | 795bp                                                    |          |
| 2558670958 | DRAFT_01626 | Protein_length | 264aa                                                    |          |
| 2558670958 | DRAFT_01626 | GC             |                                                          | 0.57     |

|            |             |                |                                                         |          |
|------------|-------------|----------------|---------------------------------------------------------|----------|
| 2558670959 | DRAFT_01627 | Locus_type     | CDS                                                     |          |
| 2558670959 | DRAFT_01627 | Product_name   | hypothetical protein                                    |          |
| 2558670959 | DRAFT_01627 | Scaffold       | DRAFT_contig_70_600_len_10654_read_count_197271.48      |          |
| 2558670959 | DRAFT_01627 | Coordinates    | 4596..5411(-)                                           |          |
| 2558670959 | DRAFT_01627 | DNA_length     | 816bp                                                   |          |
| 2558670959 | DRAFT_01627 | Protein_length | 271aa                                                   |          |
| 2558670959 | DRAFT_01627 | GC             |                                                         | 0.51     |
|            |             |                |                                                         |          |
| 2558670960 | DRAFT_01628 | COG_category   | [R] General function prediction only                    |          |
| 2558670960 | DRAFT_01628 | COG2910        | Putative NADH-flavin reductase                          | 3.00E-16 |
| 2558670960 | DRAFT_01628 | pfam13460      | NAD_binding_10                                          | 1.30E-37 |
| 2558670960 | DRAFT_01628 | Locus_type     | CDS                                                     |          |
| 2558670960 | DRAFT_01628 | Product_name   | Putative NADH-flavin reductase                          |          |
| 2558670960 | DRAFT_01628 | Scaffold       | DRAFT_contig_70_600_len_10654_read_count_197271.48      |          |
| 2558670960 | DRAFT_01628 | Coordinates    | 5593..6228(-)                                           |          |
| 2558670960 | DRAFT_01628 | DNA_length     | 636bp                                                   |          |
| 2558670960 | DRAFT_01628 | Protein_length | 211aa                                                   |          |
| 2558670960 | DRAFT_01628 | GC             |                                                         | 0.52     |
|            |             |                |                                                         |          |
| 2558670961 | DRAFT_01629 | KEGG_module    | M00248: Putative antibiotic transport system            |          |
| 2558670961 | DRAFT_01629 | COG_category   | [V] Defense mechanisms                                  |          |
| 2558670961 | DRAFT_01629 | COG0842        | ABC-type multidrug transport system, permease component | 3.00E-17 |
| 2558670961 | DRAFT_01629 | pfam12698      | ABC2_membrane_3                                         | 1.50E-50 |
| 2558670961 | DRAFT_01629 | KO:K09686      | antibiotic transport system permease protein            | 0.00E+00 |
| 2558670961 | DRAFT_01629 | Locus_type     | CDS                                                     |          |
| 2558670961 | DRAFT_01629 | Product_name   | ABC-type multidrug transport system, permease component |          |
| 2558670961 | DRAFT_01629 | Scaffold       | DRAFT_contig_70_600_len_10654_read_count_197271.48      |          |
| 2558670961 | DRAFT_01629 | Coordinates    | 6289..7482(-)                                           |          |
| 2558670961 | DRAFT_01629 | DNA_length     | 1194bp                                                  |          |
| 2558670961 | DRAFT_01629 | Protein_length | 397aa                                                   |          |
| 2558670961 | DRAFT_01629 | GC             |                                                         | 0.57     |
| 2558670961 | DRAFT_01629 | Transmembrane  | Yes                                                     |          |



|            |             |                |                                                             |           |
|------------|-------------|----------------|-------------------------------------------------------------|-----------|
| 2558670962 | DRAFT_01630 | KEGG_module    | M00248: Putative antibiotic transport system                |           |
| 2558670962 | DRAFT_01630 | COG_category   | [V] Defense mechanisms                                      |           |
| 2558670962 | DRAFT_01630 | COG1131        | ABC-type multidrug transport system, ATPase component       | 9.00E-76  |
| 2558670962 | DRAFT_01630 | pfam00005      | ABC_tran                                                    | 6.50E-31  |
| 2558670962 | DRAFT_01630 | TIGR01188      | daunorubicin resistance ABC transporter ATP-binding subunit | 1.10E-103 |
| 2558670962 | DRAFT_01630 | KO:K09687      | antibiotic transport system ATP-binding protein             | 0.00E+00  |
| 2558670962 | DRAFT_01630 | Locus_type     | CDS                                                         |           |
| 2558670962 | DRAFT_01630 | Product_name   | daunorubicin resistance ABC transporter ATP-binding subunit |           |
| 2558670962 | DRAFT_01630 | Scaffold       | DRAFT_contig_70_600_len_10654_read_count_197271.48          |           |
| 2558670962 | DRAFT_01630 | Coordinates    | 7489..8493(-)                                               |           |
| 2558670962 | DRAFT_01630 | DNA_length     | 1005bp                                                      |           |
| 2558670962 | DRAFT_01630 | Protein_length | 334aa                                                       |           |
| 2558670962 | DRAFT_01630 | GC             |                                                             | 0.56      |
| 2558670963 | DRAFT_01631 | pfam03551      | PadR                                                        | 1.80E-18  |
| 2558670963 | DRAFT_01631 | Locus_type     | CDS                                                         |           |
| 2558670963 | DRAFT_01631 | Product_name   | Predicted transcriptional regulators                        |           |
| 2558670963 | DRAFT_01631 | Scaffold       | DRAFT_contig_70_600_len_10654_read_count_197271.48          |           |
| 2558670963 | DRAFT_01631 | Coordinates    | 8541..9185(-)                                               |           |
| 2558670963 | DRAFT_01631 | DNA_length     | 645bp                                                       |           |
| 2558670963 | DRAFT_01631 | Protein_length | 214aa                                                       |           |
| 2558670963 | DRAFT_01631 | GC             |                                                             | 0.58      |
| 2558670964 | DRAFT_01632 | Locus_type     | CDS                                                         |           |
| 2558670964 | DRAFT_01632 | Product_name   | hypothetical protein                                        |           |
| 2558670964 | DRAFT_01632 | Scaffold       | DRAFT_contig_70_600_len_10654_read_count_197271.48          |           |
| 2558670964 | DRAFT_01632 | Coordinates    | 9420..9620(-)                                               |           |
| 2558670964 | DRAFT_01632 | DNA_length     | 201bp                                                       |           |
| 2558670964 | DRAFT_01632 | Protein_length | 66aa                                                        |           |
| 2558670964 | DRAFT_01632 | GC             |                                                             | 0.5       |
| 2558670965 | DRAFT_01633 | Locus_type     | CDS                                                         |           |
| 2558670965 | DRAFT_01633 | Product_name   | hypothetical protein                                        |           |
| 2558670965 | DRAFT_01633 | Scaffold       | DRAFT_contig_70_600_len_10654_read_count_197271.48          |           |

|            |             |                |                                                    |          |
|------------|-------------|----------------|----------------------------------------------------|----------|
| 2558670965 | DRAFT_01633 | Coordinates    | 9617..9880(-)                                      |          |
| 2558670965 | DRAFT_01633 | DNA_length     | 264bp                                              |          |
| 2558670965 | DRAFT_01633 | Protein_length | 87aa                                               |          |
| 2558670965 | DRAFT_01633 | GC             |                                                    | 0.49     |
| 2558670966 | DRAFT_01634 | Locus_type     | CDS                                                |          |
| 2558670966 | DRAFT_01634 | Product_name   | hypothetical protein                               |          |
| 2558670966 | DRAFT_01634 | Scaffold       | DRAFT_contig_70_600_len_10654_read_count_197271.48 |          |
| 2558670966 | DRAFT_01634 | Coordinates    | 9893..10018(-)                                     |          |
| 2558670966 | DRAFT_01634 | DNA_length     | 126bp                                              |          |
| 2558670966 | DRAFT_01634 | Protein_length | 41aa                                               |          |
| 2558670966 | DRAFT_01634 | GC             |                                                    | 0.43     |
| 2558670967 | DRAFT_01635 | pfam07883      | Cupin_2                                            | 4.70E-05 |
| 2558670967 | DRAFT_01635 | Locus_type     | CDS                                                |          |
| 2558670967 | DRAFT_01635 | Product_name   | Cupin domain                                       |          |
| 2558670967 | DRAFT_01635 | Scaffold       | DRAFT_contig_70_600_len_10654_read_count_197271.48 |          |
| 2558670967 | DRAFT_01635 | Coordinates    | 10066..10218(-)                                    |          |
| 2558670967 | DRAFT_01635 | DNA_length     | 153bp                                              |          |
| 2558670967 | DRAFT_01635 | Protein_length | 50aa                                               |          |
| 2558670967 | DRAFT_01635 | GC             |                                                    | 0.54     |
| 2558670968 | DRAFT_01636 | Locus_type     | CDS                                                |          |
| 2558670968 | DRAFT_01636 | Product_name   | hypothetical protein                               |          |
| 2558670968 | DRAFT_01636 | Scaffold       | DRAFT_contig_70_607_len_10577_read_count_184089.49 |          |
| 2558670968 | DRAFT_01636 | Coordinates    | 1..174(-)                                          |          |
| 2558670968 | DRAFT_01636 | DNA_length     | 174bp                                              |          |
| 2558670968 | DRAFT_01636 | Protein_length | 58aa                                               |          |
| 2558670968 | DRAFT_01636 | GC             |                                                    | 0.6      |
| 2558670969 | DRAFT_01637 | COG_category   | [G] Carbohydrate transport and metabolism          |          |
| 2558670969 | DRAFT_01637 | COG2814        | Arabinose efflux permease                          | 8.00E-12 |
| 2558670969 | DRAFT_01637 | pfam07690      | MFS_1                                              | 3.30E-20 |
| 2558670969 | DRAFT_01637 | pfam07690      | MFS_1                                              | 4.50E-27 |

|            |             |                |                                                             |          |
|------------|-------------|----------------|-------------------------------------------------------------|----------|
| 2558670969 | DRAFT_01637 | Locus_type     | CDS                                                         |          |
| 2558670969 | DRAFT_01637 | Product_name   | Arabinose efflux permease                                   |          |
| 2558670969 | DRAFT_01637 | Scaffold       | DRAFT_contig_70_607_len_10577_read_count_184089.49          |          |
| 2558670969 | DRAFT_01637 | Coordinates    | 217..1395(-)                                                |          |
| 2558670969 | DRAFT_01637 | DNA_length     | 1179bp                                                      |          |
| 2558670969 | DRAFT_01637 | Protein_length | 392aa                                                       |          |
| 2558670969 | DRAFT_01637 | GC             |                                                             | 0.63     |
| 2558670969 | DRAFT_01637 | Transmembrane  | Yes                                                         |          |
| 2558670970 | DRAFT_01638 | COG_category   | [S] Function unknown                                        |          |
| 2558670970 | DRAFT_01638 | COG4275        | Uncharacterized conserved protein                           | 6.00E-17 |
| 2558670970 | DRAFT_01638 | pfam09828      | Chrome_Resist                                               | 1.80E-29 |
| 2558670970 | DRAFT_01638 | Locus_type     | CDS                                                         |          |
| 2558670970 | DRAFT_01638 | Product_name   | Uncharacterized conserved protein                           |          |
| 2558670970 | DRAFT_01638 | Scaffold       | DRAFT_contig_70_607_len_10577_read_count_184089.49          |          |
| 2558670970 | DRAFT_01638 | Coordinates    | 1392..1841(-)                                               |          |
| 2558670970 | DRAFT_01638 | DNA_length     | 450bp                                                       |          |
| 2558670970 | DRAFT_01638 | Protein_length | 149aa                                                       |          |
| 2558670970 | DRAFT_01638 | GC             |                                                             | 0.63     |
| 2558670971 | DRAFT_01639 | COG_category   | [S] Function unknown                                        |          |
| 2558670971 | DRAFT_01639 | COG4275        | Uncharacterized conserved protein                           | 2.00E-41 |
| 2558670971 | DRAFT_01639 | pfam09828      | Chrome_Resist                                               | 4.40E-49 |
| 2558670971 | DRAFT_01639 | Locus_type     | CDS                                                         |          |
| 2558670971 | DRAFT_01639 | Product_name   | Uncharacterized conserved protein                           |          |
| 2558670971 | DRAFT_01639 | Scaffold       | DRAFT_contig_70_607_len_10577_read_count_184089.49          |          |
| 2558670971 | DRAFT_01639 | Coordinates    | 1845..2276(-)                                               |          |
| 2558670971 | DRAFT_01639 | DNA_length     | 432bp                                                       |          |
| 2558670971 | DRAFT_01639 | Protein_length | 143aa                                                       |          |
| 2558670971 | DRAFT_01639 | GC             |                                                             | 0.6      |
| 2558670972 | DRAFT_01640 | COG_category   | [R] General function prediction only                        |          |
| 2558670972 | DRAFT_01640 | COG2405        | Predicted nucleic acid-binding protein, contains PIN domain | 1.00E-03 |
| 2558670972 | DRAFT_01640 | Locus_type     | CDS                                                         |          |

|            |             |                |                                                                  |          |
|------------|-------------|----------------|------------------------------------------------------------------|----------|
| 2558670972 | DRAFT_01640 | Product_name   | Predicted nucleic acid-binding protein, contains PIN domain      |          |
| 2558670972 | DRAFT_01640 | Scaffold       | DRAFT_contig_70_607_len_10577_read_count_184089.49               |          |
| 2558670972 | DRAFT_01640 | Coordinates    | 2499..2981(-)                                                    |          |
| 2558670972 | DRAFT_01640 | DNA_length     | 483bp                                                            |          |
| 2558670972 | DRAFT_01640 | Protein_length | 160aa                                                            |          |
| 2558670972 | DRAFT_01640 | GC             |                                                                  | 0.5      |
|            |             |                |                                                                  |          |
| 2558670973 | DRAFT_01641 | Locus_type     | CDS                                                              |          |
| 2558670973 | DRAFT_01641 | Product_name   | hypothetical protein                                             |          |
| 2558670973 | DRAFT_01641 | Scaffold       | DRAFT_contig_70_607_len_10577_read_count_184089.49               |          |
| 2558670973 | DRAFT_01641 | Coordinates    | 2978..3550(-)                                                    |          |
| 2558670973 | DRAFT_01641 | DNA_length     | 573bp                                                            |          |
| 2558670973 | DRAFT_01641 | Protein_length | 190aa                                                            |          |
| 2558670973 | DRAFT_01641 | GC             |                                                                  | 0.51     |
|            |             |                |                                                                  |          |
| 2558670974 | DRAFT_01642 | Locus_type     | CDS                                                              |          |
| 2558670974 | DRAFT_01642 | Product_name   | hypothetical protein                                             |          |
| 2558670974 | DRAFT_01642 | Scaffold       | DRAFT_contig_70_607_len_10577_read_count_184089.49               |          |
| 2558670974 | DRAFT_01642 | Coordinates    | 3584..4663(+)                                                    |          |
| 2558670974 | DRAFT_01642 | DNA_length     | 1080bp                                                           |          |
| 2558670974 | DRAFT_01642 | Protein_length | 359aa                                                            |          |
| 2558670974 | DRAFT_01642 | GC             |                                                                  | 0.5      |
|            |             |                |                                                                  |          |
| 2558670975 | DRAFT_01643 | COG_category   | [O] Posttranslational modification, protein turnover, chaperones |          |
| 2558670975 | DRAFT_01643 | COG0638        | 20S proteasome, alpha and beta subunits                          | 3.00E-07 |
| 2558670975 | DRAFT_01643 | pfam00227      | Proteasome                                                       | 1.40E-09 |
| 2558670975 | DRAFT_01643 | Locus_type     | CDS                                                              |          |
| 2558670975 | DRAFT_01643 | Product_name   | 20S proteasome, alpha and beta subunits                          |          |
| 2558670975 | DRAFT_01643 | Scaffold       | DRAFT_contig_70_607_len_10577_read_count_184089.49               |          |
| 2558670975 | DRAFT_01643 | Coordinates    | 4788..5702(+)                                                    |          |
| 2558670975 | DRAFT_01643 | DNA_length     | 915bp                                                            |          |
| 2558670975 | DRAFT_01643 | Protein_length | 304aa                                                            |          |
| 2558670975 | DRAFT_01643 | GC             |                                                                  | 0.51     |

|            |             |                |                                                                      |                                                                    |           |
|------------|-------------|----------------|----------------------------------------------------------------------|--------------------------------------------------------------------|-----------|
| 2558670976 | DRAFT_01644 | pfam01545      | Cation_efflux                                                        |                                                                    | 1.60E-05  |
| 2558670976 | DRAFT_01644 | Locus_type     |                                                                      | CDS                                                                |           |
| 2558670976 | DRAFT_01644 | Product_name   |                                                                      | Predicted Co/Zn/Cd cation transporters                             |           |
| 2558670976 | DRAFT_01644 | Scaffold       |                                                                      | DRAFT_contig_70_607_len_10577_read_count_184089.49                 |           |
| 2558670976 | DRAFT_01644 | Coordinates    |                                                                      | 6190..6780(-)                                                      |           |
| 2558670976 | DRAFT_01644 | DNA_length     |                                                                      | 591bp                                                              |           |
| 2558670976 | DRAFT_01644 | Protein_length |                                                                      | 196aa                                                              |           |
| 2558670976 | DRAFT_01644 | GC             |                                                                      |                                                                    | 0.53      |
| 2558670976 | DRAFT_01644 | Transmembrane  |                                                                      | Yes                                                                |           |
| 2558670977 | DRAFT_01645 | COG_category   | [P] Inorganic ion transport and metabolism                           |                                                                    |           |
| 2558670977 | DRAFT_01645 | COG1914        | Mn2+ and Fe2+ transporters of the NRAMP family                       |                                                                    | 8.00E-66  |
| 2558670977 | DRAFT_01645 | pfam01566      | Nramp                                                                |                                                                    | 1.50E-105 |
| 2558670977 | DRAFT_01645 | TIGR01197      | NRAMP (natural resistance-associated macrophage protein) metal ion t |                                                                    | 2.50E-86  |
| 2558670977 | DRAFT_01645 | KO:K03322      | manganese transport protein                                          |                                                                    | 0.00E+00  |
| 2558670977 | DRAFT_01645 | Locus_type     |                                                                      | CDS                                                                |           |
| 2558670977 | DRAFT_01645 | Product_name   |                                                                      | NRAMP (natural resistance-associated macrophage protein) metal ior |           |
| 2558670977 | DRAFT_01645 | Scaffold       |                                                                      | DRAFT_contig_70_607_len_10577_read_count_184089.49                 |           |
| 2558670977 | DRAFT_01645 | Coordinates    |                                                                      | 7160..8452(-)                                                      |           |
| 2558670977 | DRAFT_01645 | DNA_length     |                                                                      | 1293bp                                                             |           |
| 2558670977 | DRAFT_01645 | Protein_length |                                                                      | 430aa                                                              |           |
| 2558670977 | DRAFT_01645 | GC             |                                                                      |                                                                    | 0.55      |
| 2558670977 | DRAFT_01645 | Transmembrane  |                                                                      | Yes                                                                |           |
| 2558670978 | DRAFT_01646 | COG_category   | [K] Transcription                                                    |                                                                    |           |
| 2558670978 | DRAFT_01646 | COG1321        | Mn-dependent transcriptional regulator                               |                                                                    | 2.00E-24  |
| 2558670978 | DRAFT_01646 | pfam01325      | Fe_dep_repress                                                       |                                                                    | 2.40E-19  |
| 2558670978 | DRAFT_01646 | pfam02742      | Fe_dep_repr_C                                                        |                                                                    | 7.00E-14  |
| 2558670978 | DRAFT_01646 | ITERM:02272    | iron (metal) dependent repressor, DtxR family                        |                                                                    |           |
| 2558670978 | DRAFT_01646 | Locus_type     |                                                                      | CDS                                                                |           |
| 2558670978 | DRAFT_01646 | Product_name   |                                                                      | iron (metal) dependent repressor, DtxR family                      |           |
| 2558670978 | DRAFT_01646 | Scaffold       |                                                                      | DRAFT_contig_70_607_len_10577_read_count_184089.49                 |           |
| 2558670978 | DRAFT_01646 | Coordinates    |                                                                      | 8569..9042(+)                                                      |           |
| 2558670978 | DRAFT_01646 | DNA_length     |                                                                      | 474bp                                                              |           |

|            |             |                |                                                      |                                                    |          |
|------------|-------------|----------------|------------------------------------------------------|----------------------------------------------------|----------|
| 2558670978 | DRAFT_01646 | Protein_length |                                                      | 157aa                                              |          |
| 2558670978 | DRAFT_01646 | GC             |                                                      |                                                    | 0.53     |
| 2558670979 | DRAFT_01647 | pfam13240      | zinc_ribbon_2                                        |                                                    | 8.90E-08 |
| 2558670979 | DRAFT_01647 | Locus_type     |                                                      | CDS                                                |          |
| 2558670979 | DRAFT_01647 | Product_name   |                                                      | zinc-ribbon domain                                 |          |
| 2558670979 | DRAFT_01647 | Scaffold       |                                                      | DRAFT_contig_70_607_len_10577_read_count_184089.49 |          |
| 2558670979 | DRAFT_01647 | Coordinates    |                                                      | 9338..9745(-)                                      |          |
| 2558670979 | DRAFT_01647 | DNA_length     |                                                      | 408bp                                              |          |
| 2558670979 | DRAFT_01647 | Protein_length |                                                      | 135aa                                              |          |
| 2558670979 | DRAFT_01647 | GC             |                                                      |                                                    | 0.55     |
| 2558670979 | DRAFT_01647 | Transmembrane  |                                                      | Yes                                                |          |
| 2558670980 | DRAFT_01648 | pfam13414      | TPR_11                                               |                                                    | 3.10E-09 |
| 2558670980 | DRAFT_01648 | Locus_type     |                                                      | CDS                                                |          |
| 2558670980 | DRAFT_01648 | Product_name   |                                                      | TPR repeat                                         |          |
| 2558670980 | DRAFT_01648 | Scaffold       |                                                      | DRAFT_contig_70_607_len_10577_read_count_184089.49 |          |
| 2558670980 | DRAFT_01648 | Coordinates    |                                                      | 9883..10575(-)                                     |          |
| 2558670980 | DRAFT_01648 | DNA_length     |                                                      | 693bp                                              |          |
| 2558670980 | DRAFT_01648 | Protein_length |                                                      | 230aa                                              |          |
| 2558670980 | DRAFT_01648 | GC             |                                                      |                                                    | 0.56     |
| 2558670981 | DRAFT_01649 | Locus_type     |                                                      | tRNA                                               |          |
| 2558670981 | DRAFT_01649 | Product_name   |                                                      | tRNA_Undet_???                                     |          |
| 2558670981 | DRAFT_01649 | Scaffold       |                                                      | DRAFT_contig_70_610_len_10561_read_count_224801.50 |          |
| 2558670981 | DRAFT_01649 | Coordinates    |                                                      | 42..143(+)                                         |          |
| 2558670981 | DRAFT_01649 | DNA_length     |                                                      | 102bp                                              |          |
| 2558670981 | DRAFT_01649 | GC             |                                                      |                                                    | 0.61     |
| 2558670982 | DRAFT_01650 | TIGR01376      | Chlamydial polymorphic outer membrane protein repeat |                                                    | 4.00E-06 |
| 2558670982 | DRAFT_01650 | Locus_type     |                                                      | CDS                                                |          |
| 2558670982 | DRAFT_01650 | Product_name   |                                                      | hypothetical protein                               |          |
| 2558670982 | DRAFT_01650 | Scaffold       |                                                      | DRAFT_contig_70_610_len_10561_read_count_224801.50 |          |
| 2558670982 | DRAFT_01650 | Coordinates    |                                                      | 441..602(+)                                        |          |

|            |             |                |                            |                                                                      |          |
|------------|-------------|----------------|----------------------------|----------------------------------------------------------------------|----------|
| 2558670982 | DRAFT_01650 | DNA_length     |                            | 162bp                                                                |          |
| 2558670982 | DRAFT_01650 | Protein_length |                            | 53aa                                                                 |          |
| 2558670982 | DRAFT_01650 | GC             |                            |                                                                      | 0.6      |
| 2558670983 | DRAFT_01651 | Locus_type     |                            | CDS                                                                  |          |
| 2558670983 | DRAFT_01651 | Product_name   |                            | hypothetical protein                                                 |          |
| 2558670983 | DRAFT_01651 | Scaffold       |                            | DRAFT_contig_70_610_len_10561_read_count_224801.50                   |          |
| 2558670983 | DRAFT_01651 | Coordinates    |                            | 728..3334(-)                                                         |          |
| 2558670983 | DRAFT_01651 | DNA_length     |                            | 2607bp                                                               |          |
| 2558670983 | DRAFT_01651 | Protein_length |                            | 868aa                                                                |          |
| 2558670983 | DRAFT_01651 | GC             |                            |                                                                      | 0.48     |
| 2558670983 | DRAFT_01651 | Transmembrane  |                            | Yes                                                                  |          |
| 2558670984 | DRAFT_01652 | pfam13231      | PMT_2                      |                                                                      | 4.30E-10 |
| 2558670984 | DRAFT_01652 | Locus_type     |                            | CDS                                                                  |          |
| 2558670984 | DRAFT_01652 | Product_name   |                            | 4-amino-4-deoxy-L-arabinose transferase and related glycosyltransfer |          |
| 2558670984 | DRAFT_01652 | Scaffold       |                            | DRAFT_contig_70_610_len_10561_read_count_224801.50                   |          |
| 2558670984 | DRAFT_01652 | Coordinates    |                            | 3337..5178(-)                                                        |          |
| 2558670984 | DRAFT_01652 | DNA_length     |                            | 1842bp                                                               |          |
| 2558670984 | DRAFT_01652 | Protein_length |                            | 613aa                                                                |          |
| 2558670984 | DRAFT_01652 | GC             |                            |                                                                      | 0.48     |
| 2558670984 | DRAFT_01652 | Transmembrane  |                            | Yes                                                                  |          |
| 2558670985 | DRAFT_01653 | COG_category   | [S] Function unknown       |                                                                      |          |
| 2558670985 | DRAFT_01653 | COG2246        | Predicted membrane protein |                                                                      | 1.00E-15 |
| 2558670985 | DRAFT_01653 | pfam00535      | Glycos_transf_2            |                                                                      | 8.50E-24 |
| 2558670985 | DRAFT_01653 | pfam04138      | GtrA                       |                                                                      | 4.60E-20 |
| 2558670985 | DRAFT_01653 | Locus_type     |                            | CDS                                                                  |          |
| 2558670985 | DRAFT_01653 | Product_name   |                            | Predicted membrane protein                                           |          |
| 2558670985 | DRAFT_01653 | Scaffold       |                            | DRAFT_contig_70_610_len_10561_read_count_224801.50                   |          |
| 2558670985 | DRAFT_01653 | Coordinates    |                            | 5262..6518(-)                                                        |          |
| 2558670985 | DRAFT_01653 | DNA_length     |                            | 1257bp                                                               |          |
| 2558670985 | DRAFT_01653 | Protein_length |                            | 418aa                                                                |          |
| 2558670985 | DRAFT_01653 | GC             |                            |                                                                      | 0.51     |

|            |             |                |                                                                      |          |
|------------|-------------|----------------|----------------------------------------------------------------------|----------|
| 2558670985 | DRAFT_01653 | Transmembrane  | Yes                                                                  |          |
| 2558670986 | DRAFT_01654 | KEGG_module    | M00362: Nucleotide sugar biosynthesis, prokaryotes                   |          |
| 2558670986 | DRAFT_01654 | KEGG_module    | M00361: Nucleotide sugar biosynthesis, eukaryotes                    |          |
| 2558670986 | DRAFT_01654 | Metacyc        | COLANSYN-PWY: colanic acid building blocks biosynthesis              |          |
| 2558670986 | DRAFT_01654 | Metacyc        | PWY-6317: galactose degradation I (Leloir pathway)                   |          |
| 2558670986 | DRAFT_01654 | Metacyc        | PWY-6397: mycolyl-arabinogalactan-peptidoglycan complex biosynthesis |          |
| 2558670986 | DRAFT_01654 | Metacyc        | PWY-3821: galactose degradation III                                  |          |
| 2558670986 | DRAFT_01654 | Metacyc        | PWY-6527: stachyose degradation                                      |          |
| 2558670986 | DRAFT_01654 | COG_category   | [M] Cell wall/membrane/envelope biogenesis                           |          |
| 2558670986 | DRAFT_01654 | COG_category   | [G] Carbohydrate transport and metabolism                            |          |
| 2558670986 | DRAFT_01654 | COG0451        | Nucleoside-diphosphate-sugar epimerases                              | 7.00E-46 |
| 2558670986 | DRAFT_01654 | pfam01370      | Epimerase                                                            | 1.70E-44 |
| 2558670986 | DRAFT_01654 | EC:5.1.3.2     | UDP-glucose 4-epimerase.                                             |          |
| 2558670986 | DRAFT_01654 | KO:K01784      | UDP-glucose 4-epimerase [EC:5.1.3.2]                                 | 0.00E+00 |
| 2558670986 | DRAFT_01654 | Locus_type     | CDS                                                                  |          |
| 2558670986 | DRAFT_01654 | Product_name   | Nucleoside-diphosphate-sugar epimerases                              |          |
| 2558670986 | DRAFT_01654 | Scaffold       | DRAFT_contig_70_610_len_10561_read_count_224801.50                   |          |
| 2558670986 | DRAFT_01654 | Coordinates    | 6543..7568(-)                                                        |          |
| 2558670986 | DRAFT_01654 | DNA_length     | 1026bp                                                               |          |
| 2558670986 | DRAFT_01654 | Protein_length | 341aa                                                                |          |
| 2558670986 | DRAFT_01654 | GC             |                                                                      | 0.52     |
| 2558670987 | DRAFT_01655 | Locus_type     | CDS                                                                  |          |
| 2558670987 | DRAFT_01655 | Product_name   | hypothetical protein                                                 |          |
| 2558670987 | DRAFT_01655 | Scaffold       | DRAFT_contig_70_610_len_10561_read_count_224801.50                   |          |
| 2558670987 | DRAFT_01655 | Coordinates    | 7625..7843(-)                                                        |          |
| 2558670987 | DRAFT_01655 | DNA_length     | 219bp                                                                |          |
| 2558670987 | DRAFT_01655 | Protein_length | 72aa                                                                 |          |
| 2558670987 | DRAFT_01655 | GC             |                                                                      | 0.45     |
| 2558670987 | DRAFT_01655 | Transmembrane  | Yes                                                                  |          |
| 2558670988 | DRAFT_01656 | pfam08241      | Methyltransf_11                                                      | 2.10E-05 |
| 2558670988 | DRAFT_01656 | Locus_type     | CDS                                                                  |          |



|            |             |                |        |                                                    |          |
|------------|-------------|----------------|--------|----------------------------------------------------|----------|
| 2558670988 | DRAFT_01656 | Product_name   |        | Predicted RNA methylase                            |          |
| 2558670988 | DRAFT_01656 | Scaffold       |        | DRAFT_contig_70_610_len_10561_read_count_224801.50 |          |
| 2558670988 | DRAFT_01656 | Coordinates    |        | 8089..8667(-)                                      |          |
| 2558670988 | DRAFT_01656 | DNA_length     |        | 579bp                                              |          |
| 2558670988 | DRAFT_01656 | Protein_length |        | 192aa                                              |          |
| 2558670988 | DRAFT_01656 | GC             |        |                                                    | 0.55     |
|            |             |                |        |                                                    |          |
| 2558670989 | DRAFT_01657 | Locus_type     |        | CDS                                                |          |
| 2558670989 | DRAFT_01657 | Product_name   |        | hypothetical protein                               |          |
| 2558670989 | DRAFT_01657 | Scaffold       |        | DRAFT_contig_70_610_len_10561_read_count_224801.50 |          |
| 2558670989 | DRAFT_01657 | Coordinates    |        | 8973..9239(-)                                      |          |
| 2558670989 | DRAFT_01657 | DNA_length     |        | 267bp                                              |          |
| 2558670989 | DRAFT_01657 | Protein_length |        | 88aa                                               |          |
| 2558670989 | DRAFT_01657 | GC             |        |                                                    | 0.47     |
|            |             |                |        |                                                    |          |
| 2558670990 | DRAFT_01658 | pfam04851      | ResIII |                                                    | 1.20E-21 |
| 2558670990 | DRAFT_01658 | Locus_type     |        | CDS                                                |          |
| 2558670990 | DRAFT_01658 | Product_name   |        | DNA or RNA helicases of superfamily II             |          |
| 2558670990 | DRAFT_01658 | Scaffold       |        | DRAFT_contig_70_610_len_10561_read_count_224801.50 |          |
| 2558670990 | DRAFT_01658 | Coordinates    |        | 9617..10558(+)                                     |          |
| 2558670990 | DRAFT_01658 | DNA_length     |        | 942bp                                              |          |
| 2558670990 | DRAFT_01658 | Protein_length |        | 314aa                                              |          |
| 2558670990 | DRAFT_01658 | GC             |        |                                                    | 0.56     |
|            |             |                |        |                                                    |          |
| 2558670991 | DRAFT_01659 | Locus_type     |        | CDS                                                |          |
| 2558670991 | DRAFT_01659 | Product_name   |        | hypothetical protein                               |          |
| 2558670991 | DRAFT_01659 | Scaffold       |        | DRAFT_contig_70_633_len_10267_read_count_171144.51 |          |
| 2558670991 | DRAFT_01659 | Coordinates    |        | 2..373(-)                                          |          |
| 2558670991 | DRAFT_01659 | DNA_length     |        | 372bp                                              |          |
| 2558670991 | DRAFT_01659 | Protein_length |        | 124aa                                              |          |
| 2558670991 | DRAFT_01659 | GC             |        |                                                    | 0.56     |
| 2558670991 | DRAFT_01659 | Transmembrane  |        | Yes                                                |          |
|            |             |                |        |                                                    |          |
| 2558670992 | DRAFT_01660 | Locus_type     |        | CDS                                                |          |

|            |             |                |                                                            |          |
|------------|-------------|----------------|------------------------------------------------------------|----------|
| 2558670992 | DRAFT_01660 | Product_name   | hypothetical protein                                       |          |
| 2558670992 | DRAFT_01660 | Scaffold       | DRAFT_contig_70_633_len_10267_read_count_171144.51         |          |
| 2558670992 | DRAFT_01660 | Coordinates    | 508..1158(+)                                               |          |
| 2558670992 | DRAFT_01660 | DNA_length     | 651bp                                                      |          |
| 2558670992 | DRAFT_01660 | Protein_length | 216aa                                                      |          |
| 2558670992 | DRAFT_01660 | GC             |                                                            | 0.52     |
| 2558670992 | DRAFT_01660 | Transmembrane  | Yes                                                        |          |
| 2558670993 | DRAFT_01661 | COG_category   | [M] Cell wall/membrane/envelope biogenesis                 |          |
| 2558670993 | DRAFT_01661 | COG_category   | [G] Carbohydrate transport and metabolism                  |          |
| 2558670993 | DRAFT_01661 | COG0451        | Nucleoside-diphosphate-sugar epimerases                    | 9.00E-09 |
| 2558670993 | DRAFT_01661 | pfam13460      | NAD_binding_10                                             | 4.00E-05 |
| 2558670993 | DRAFT_01661 | pfam01370      | Epimerase                                                  | 5.20E-05 |
| 2558670993 | DRAFT_01661 | Locus_type     | CDS                                                        |          |
| 2558670993 | DRAFT_01661 | Product_name   | NADH(P)-binding/NAD dependent epimerase/dehydratase family |          |
| 2558670993 | DRAFT_01661 | Scaffold       | DRAFT_contig_70_633_len_10267_read_count_171144.51         |          |
| 2558670993 | DRAFT_01661 | Coordinates    | 1345..2325(-)                                              |          |
| 2558670993 | DRAFT_01661 | DNA_length     | 981bp                                                      |          |
| 2558670993 | DRAFT_01661 | Protein_length | 326aa                                                      |          |
| 2558670993 | DRAFT_01661 | GC             |                                                            | 0.6      |
| 2558670994 | DRAFT_01662 | Locus_type     | CDS                                                        |          |
| 2558670994 | DRAFT_01662 | Product_name   | hypothetical protein                                       |          |
| 2558670994 | DRAFT_01662 | Scaffold       | DRAFT_contig_70_633_len_10267_read_count_171144.51         |          |
| 2558670994 | DRAFT_01662 | Coordinates    | 2642..3289(-)                                              |          |
| 2558670994 | DRAFT_01662 | DNA_length     | 648bp                                                      |          |
| 2558670994 | DRAFT_01662 | Protein_length | 215aa                                                      |          |
| 2558670994 | DRAFT_01662 | GC             |                                                            | 0.57     |
| 2558670994 | DRAFT_01662 | Transmembrane  | Yes                                                        |          |
| 2558670995 | DRAFT_01663 | pfam14417      | MEDS                                                       | 8.20E-09 |
| 2558670995 | DRAFT_01663 | Locus_type     | CDS                                                        |          |
| 2558670995 | DRAFT_01663 | Product_name   | MEDS: MEthanogen/methylotroph, DcmR Sensory domain         |          |
| 2558670995 | DRAFT_01663 | Scaffold       | DRAFT_contig_70_633_len_10267_read_count_171144.51         |          |

|            |             |                |      |                                                    |          |
|------------|-------------|----------------|------|----------------------------------------------------|----------|
| 2558670995 | DRAFT_01663 | Coordinates    |      | 3404..4009(-)                                      |          |
| 2558670995 | DRAFT_01663 | DNA_length     |      | 606bp                                              |          |
| 2558670995 | DRAFT_01663 | Protein_length |      | 201aa                                              |          |
| 2558670995 | DRAFT_01663 | GC             |      |                                                    | 0.55     |
|            |             |                |      |                                                    |          |
| 2558670996 | DRAFT_01664 | Locus_type     |      | CDS                                                |          |
| 2558670996 | DRAFT_01664 | Product_name   |      | hypothetical protein                               |          |
| 2558670996 | DRAFT_01664 | Scaffold       |      | DRAFT_contig_70_633_len_10267_read_count_171144.51 |          |
| 2558670996 | DRAFT_01664 | Coordinates    |      | 4193..4543(+)                                      |          |
| 2558670996 | DRAFT_01664 | DNA_length     |      | 351bp                                              |          |
| 2558670996 | DRAFT_01664 | Protein_length |      | 116aa                                              |          |
| 2558670996 | DRAFT_01664 | GC             |      |                                                    | 0.54     |
|            |             |                |      |                                                    |          |
| 2558670997 | DRAFT_01665 | Locus_type     |      | CDS                                                |          |
| 2558670997 | DRAFT_01665 | Product_name   |      | hypothetical protein                               |          |
| 2558670997 | DRAFT_01665 | Scaffold       |      | DRAFT_contig_70_633_len_10267_read_count_171144.51 |          |
| 2558670997 | DRAFT_01665 | Coordinates    |      | 4540..4737(+)                                      |          |
| 2558670997 | DRAFT_01665 | DNA_length     |      | 198bp                                              |          |
| 2558670997 | DRAFT_01665 | Protein_length |      | 65aa                                               |          |
| 2558670997 | DRAFT_01665 | GC             |      |                                                    | 0.53     |
|            |             |                |      |                                                    |          |
| 2558670998 | DRAFT_01666 | Locus_type     |      | CDS                                                |          |
| 2558670998 | DRAFT_01666 | Product_name   |      | hypothetical protein                               |          |
| 2558670998 | DRAFT_01666 | Scaffold       |      | DRAFT_contig_70_633_len_10267_read_count_171144.51 |          |
| 2558670998 | DRAFT_01666 | Coordinates    |      | 4894..5829(+)                                      |          |
| 2558670998 | DRAFT_01666 | DNA_length     |      | 936bp                                              |          |
| 2558670998 | DRAFT_01666 | Protein_length |      | 311aa                                              |          |
| 2558670998 | DRAFT_01666 | GC             |      |                                                    | 0.57     |
|            |             |                |      |                                                    |          |
| 2558670999 | DRAFT_01667 | pfam01978      | TrmB |                                                    | 1.30E-05 |
| 2558670999 | DRAFT_01667 | Locus_type     |      | CDS                                                |          |
| 2558670999 | DRAFT_01667 | Product_name   |      | Sugar-specific transcriptional regulator TrmB      |          |
| 2558670999 | DRAFT_01667 | Scaffold       |      | DRAFT_contig_70_633_len_10267_read_count_171144.51 |          |
| 2558670999 | DRAFT_01667 | Coordinates    |      | 5970..6353(+)                                      |          |

|            |             |                |         |                                                    |          |
|------------|-------------|----------------|---------|----------------------------------------------------|----------|
| 2558670999 | DRAFT_01667 | DNA_length     |         | 384bp                                              |          |
| 2558670999 | DRAFT_01667 | Protein_length |         | 127aa                                              |          |
| 2558670999 | DRAFT_01667 | GC             |         |                                                    | 0.58     |
|            |             |                |         |                                                    |          |
| 2558671000 | DRAFT_01668 | Locus_type     |         | CDS                                                |          |
| 2558671000 | DRAFT_01668 | Product_name   |         | hypothetical protein                               |          |
| 2558671000 | DRAFT_01668 | Scaffold       |         | DRAFT_contig_70_633_len_10267_read_count_171144.51 |          |
| 2558671000 | DRAFT_01668 | Coordinates    |         | 6454..6792(+)                                      |          |
| 2558671000 | DRAFT_01668 | DNA_length     |         | 339bp                                              |          |
| 2558671000 | DRAFT_01668 | Protein_length |         | 112aa                                              |          |
| 2558671000 | DRAFT_01668 | GC             |         |                                                    | 0.58     |
| 2558671000 | DRAFT_01668 | Transmembrane  |         | Yes                                                |          |
|            |             |                |         |                                                    |          |
| 2558671001 | DRAFT_01669 | Locus_type     |         | CDS                                                |          |
| 2558671001 | DRAFT_01669 | Product_name   |         | hypothetical protein                               |          |
| 2558671001 | DRAFT_01669 | Scaffold       |         | DRAFT_contig_70_633_len_10267_read_count_171144.51 |          |
| 2558671001 | DRAFT_01669 | Coordinates    |         | 7053..7217(+)                                      |          |
| 2558671001 | DRAFT_01669 | DNA_length     |         | 165bp                                              |          |
| 2558671001 | DRAFT_01669 | Protein_length |         | 54aa                                               |          |
| 2558671001 | DRAFT_01669 | GC             |         |                                                    | 0.56     |
|            |             |                |         |                                                    |          |
| 2558671002 | DRAFT_01670 | pfam14321      | DUF4382 |                                                    | 8.80E-18 |
| 2558671002 | DRAFT_01670 | Locus_type     |         | CDS                                                |          |
| 2558671002 | DRAFT_01670 | Product_name   |         | Domain of unknown function (DUF4382)               |          |
| 2558671002 | DRAFT_01670 | Scaffold       |         | DRAFT_contig_70_633_len_10267_read_count_171144.51 |          |
| 2558671002 | DRAFT_01670 | Coordinates    |         | 7578..8705(-)                                      |          |
| 2558671002 | DRAFT_01670 | DNA_length     |         | 1128bp                                             |          |
| 2558671002 | DRAFT_01670 | Protein_length |         | 375aa                                              |          |
| 2558671002 | DRAFT_01670 | GC             |         |                                                    | 0.57     |
|            |             |                |         |                                                    |          |
| 2558671003 | DRAFT_01671 | Locus_type     |         | CDS                                                |          |
| 2558671003 | DRAFT_01671 | Product_name   |         | hypothetical protein                               |          |
| 2558671003 | DRAFT_01671 | Scaffold       |         | DRAFT_contig_70_633_len_10267_read_count_171144.51 |          |
| 2558671003 | DRAFT_01671 | Coordinates    |         | 8921..9376(-)                                      |          |

|            |             |                |                                                    |          |
|------------|-------------|----------------|----------------------------------------------------|----------|
| 2558671003 | DRAFT_01671 | DNA_length     | 456bp                                              |          |
| 2558671003 | DRAFT_01671 | Protein_length | 151aa                                              |          |
| 2558671003 | DRAFT_01671 | GC             |                                                    | 0.54     |
| 2558671004 | DRAFT_01672 | Locus_type     | CDS                                                |          |
| 2558671004 | DRAFT_01672 | Product_name   | hypothetical protein                               |          |
| 2558671004 | DRAFT_01672 | Scaffold       | DRAFT_contig_70_633_len_10267_read_count_171144.51 |          |
| 2558671004 | DRAFT_01672 | Coordinates    | 9504..9809(-)                                      |          |
| 2558671004 | DRAFT_01672 | DNA_length     | 306bp                                              |          |
| 2558671004 | DRAFT_01672 | Protein_length | 101aa                                              |          |
| 2558671004 | DRAFT_01672 | GC             |                                                    | 0.56     |
| 2558671005 | DRAFT_01673 | pfam07790      | DUF1628                                            | 5.60E-08 |
| 2558671005 | DRAFT_01673 | TIGR02537      | archaeal flagellin N-terminal-like domain          | 5.20E-11 |
| 2558671005 | DRAFT_01673 | Locus_type     | CDS                                                |          |
| 2558671005 | DRAFT_01673 | Product_name   | archaeal flagellin N-terminal-like domain          |          |
| 2558671005 | DRAFT_01673 | Scaffold       | DRAFT_contig_70_633_len_10267_read_count_171144.51 |          |
| 2558671005 | DRAFT_01673 | Coordinates    | 9946..10266(+)                                     |          |
| 2558671005 | DRAFT_01673 | DNA_length     | 321bp                                              |          |
| 2558671005 | DRAFT_01673 | Protein_length | 107aa                                              |          |
| 2558671005 | DRAFT_01673 | GC             |                                                    | 0.53     |
| 2558671005 | DRAFT_01673 | Transmembrane  | Yes                                                |          |
| 2558671006 | DRAFT_01674 | pfam02683      | DsbD                                               | 6.30E-08 |
| 2558671006 | DRAFT_01674 | pfam02683      | DsbD                                               | 2.60E-24 |
| 2558671006 | DRAFT_01674 | KO:K06196      | cytochrome c-type biogenesis protein               | 8.90E-36 |
| 2558671006 | DRAFT_01674 | Locus_type     | CDS                                                |          |
| 2558671006 | DRAFT_01674 | Product_name   | Cytochrome c biogenesis protein                    |          |
| 2558671006 | DRAFT_01674 | Scaffold       | DRAFT_contig_70_700_len_9743_read_count_155629.52  |          |
| 2558671006 | DRAFT_01674 | Coordinates    | 94..771(-)                                         |          |
| 2558671006 | DRAFT_01674 | DNA_length     | 678bp                                              |          |
| 2558671006 | DRAFT_01674 | Protein_length | 225aa                                              |          |
| 2558671006 | DRAFT_01674 | GC             |                                                    | 0.52     |
| 2558671006 | DRAFT_01674 | Transmembrane  | Yes                                                |          |

|            |             |                |                                                      |          |
|------------|-------------|----------------|------------------------------------------------------|----------|
| 2558671007 | DRAFT_01675 | Locus_type     | CDS                                                  |          |
| 2558671007 | DRAFT_01675 | Product_name   | hypothetical protein                                 |          |
| 2558671007 | DRAFT_01675 | Scaffold       | DRAFT_contig_70_700_len_9743_read_count_155629.52    |          |
| 2558671007 | DRAFT_01675 | Coordinates    | 1148..1939(+)                                        |          |
| 2558671007 | DRAFT_01675 | DNA_length     | 792bp                                                |          |
| 2558671007 | DRAFT_01675 | Protein_length | 263aa                                                |          |
| 2558671007 | DRAFT_01675 | GC             |                                                      | 0.58     |
| 2558671007 | DRAFT_01675 | Transmembrane  | Yes                                                  |          |
| 2558671008 | DRAFT_01676 | Metacyc        | PWY-6654: phosphopantothenate biosynthesis III       |          |
| 2558671008 | DRAFT_01676 | COG_category   | [R] General function prediction only                 |          |
| 2558671008 | DRAFT_01676 | COG1829        | Predicted archaeal kinase (sugar kinase superfamily) | 6.00E-24 |
| 2558671008 | DRAFT_01676 | pfam00288      | GHMP_kinases_N                                       | 1.10E-04 |
| 2558671008 | DRAFT_01676 | EC:2.7.1.169   | Pantoate kinase.                                     |          |
| 2558671008 | DRAFT_01676 | KO:K06982      | pantoate kinase [EC:2.7.1.169]                       | 5.20E-24 |
| 2558671008 | DRAFT_01676 | Locus_type     | CDS                                                  |          |
| 2558671008 | DRAFT_01676 | Product_name   | Predicted archaeal kinase (sugar kinase superfamily) |          |
| 2558671008 | DRAFT_01676 | Scaffold       | DRAFT_contig_70_700_len_9743_read_count_155629.52    |          |
| 2558671008 | DRAFT_01676 | Coordinates    | 2049..2879(+)                                        |          |
| 2558671008 | DRAFT_01676 | DNA_length     | 831bp                                                |          |
| 2558671008 | DRAFT_01676 | Protein_length | 276aa                                                |          |
| 2558671008 | DRAFT_01676 | GC             |                                                      | 0.61     |
| 2558671008 | DRAFT_01676 | Transmembrane  | Yes                                                  |          |
| 2558671009 | DRAFT_01677 | COG_category   | [E] Amino acid transport and metabolism              |          |
| 2558671009 | DRAFT_01677 | COG0006        | Xaa-Pro aminopeptidase                               | 3.00E-57 |
| 2558671009 | DRAFT_01677 | pfam00557      | Peptidase_M24                                        | 1.80E-50 |
| 2558671009 | DRAFT_01677 | EC:3.4.13.9    | Xaa-Pro dipeptidase.                                 |          |
| 2558671009 | DRAFT_01677 | KO:K01271      | Xaa-Pro dipeptidase [EC:3.4.13.9]                    | 0.00E+00 |
| 2558671009 | DRAFT_01677 | Locus_type     | CDS                                                  |          |
| 2558671009 | DRAFT_01677 | Product_name   | Xaa-Pro aminopeptidase                               |          |
| 2558671009 | DRAFT_01677 | Scaffold       | DRAFT_contig_70_700_len_9743_read_count_155629.52    |          |
| 2558671009 | DRAFT_01677 | Coordinates    | 2876..3922(-)                                        |          |

|            |             |                |                                                                |           |
|------------|-------------|----------------|----------------------------------------------------------------|-----------|
| 2558671009 | DRAFT_01677 | DNA_length     | 1047bp                                                         |           |
| 2558671009 | DRAFT_01677 | Protein_length | 348aa                                                          |           |
| 2558671009 | DRAFT_01677 | GC             |                                                                | 0.61      |
| 2558671010 | DRAFT_01678 | COG_category   | [D] Cell cycle control, cell division, chromosome partitioning |           |
| 2558671010 | DRAFT_01678 | COG1196        | Chromosome segregation ATPases                                 | 7.00E-125 |
| 2558671010 | DRAFT_01678 | pfam02463      | SMC_N                                                          | 8.10E-57  |
| 2558671010 | DRAFT_01678 | pfam06470      | SMC_hinge                                                      | 3.50E-15  |
| 2558671010 | DRAFT_01678 | KO:K03529      | chromosome segregation protein                                 | 0.00E+00  |
| 2558671010 | DRAFT_01678 | Locus_type     | CDS                                                            |           |
| 2558671010 | DRAFT_01678 | Product_name   | Chromosome segregation ATPases                                 |           |
| 2558671010 | DRAFT_01678 | Scaffold       | DRAFT_contig_70_700_len_9743_read_count_155629.52              |           |
| 2558671010 | DRAFT_01678 | Coordinates    | 3964..7554(+)                                                  |           |
| 2558671010 | DRAFT_01678 | DNA_length     | 3591bp                                                         |           |
| 2558671010 | DRAFT_01678 | Protein_length | 1196aa                                                         |           |
| 2558671010 | DRAFT_01678 | GC             |                                                                | 0.61      |
| 2558671011 | DRAFT_01679 | COG_category   | [S] Function unknown                                           |           |
| 2558671011 | DRAFT_01679 | COG1354        | Uncharacterized conserved protein                              | 1.00E-04  |
| 2558671011 | DRAFT_01679 | KO:K05896      | segregation and condensation protein A                         | 4.20E-30  |
| 2558671011 | DRAFT_01679 | ITERM:00133    | condensin subunit ScpA                                         |           |
| 2558671011 | DRAFT_01679 | Locus_type     | CDS                                                            |           |
| 2558671011 | DRAFT_01679 | Product_name   | condensin subunit ScpA                                         |           |
| 2558671011 | DRAFT_01679 | Scaffold       | DRAFT_contig_70_700_len_9743_read_count_155629.52              |           |
| 2558671011 | DRAFT_01679 | Coordinates    | 7547..8212(+)                                                  |           |
| 2558671011 | DRAFT_01679 | DNA_length     | 666bp                                                          |           |
| 2558671011 | DRAFT_01679 | Protein_length | 221aa                                                          |           |
| 2558671011 | DRAFT_01679 | GC             |                                                                | 0.59      |
| 2558671012 | DRAFT_01680 | COG_category   | [K] Transcription                                              |           |
| 2558671012 | DRAFT_01680 | COG1386        | Predicted transcriptional regulator containing the HTH domain  | 1.00E-20  |
| 2558671012 | DRAFT_01680 | pfam04079      | DUF387                                                         | 2.60E-30  |
| 2558671012 | DRAFT_01680 | TIGR00281      | segregation and condensation protein B                         | 1.90E-28  |
| 2558671012 | DRAFT_01680 | KO:K06024      | segregation and condensation protein B                         | 1.50E-33  |

|            |             |                |                                                                   |          |
|------------|-------------|----------------|-------------------------------------------------------------------|----------|
| 2558671012 | DRAFT_01680 | Locus_type     | CDS                                                               |          |
| 2558671012 | DRAFT_01680 | Product_name   | Predicted transcriptional regulator containing the HTH domain     |          |
| 2558671012 | DRAFT_01680 | Scaffold       | DRAFT_contig_70_700_len_9743_read_count_155629.52                 |          |
| 2558671012 | DRAFT_01680 | Coordinates    | 8214..8744(+)                                                     |          |
| 2558671012 | DRAFT_01680 | DNA_length     | 531bp                                                             |          |
| 2558671012 | DRAFT_01680 | Protein_length | 176aa                                                             |          |
| 2558671012 | DRAFT_01680 | GC             |                                                                   | 0.61     |
|            |             |                |                                                                   |          |
| 2558671013 | DRAFT_01681 | KEGG_module    | M00179: Ribosome, archaea                                         |          |
| 2558671013 | DRAFT_01681 | KEGG_module    | M00177: Ribosome, eukaryotes                                      |          |
| 2558671013 | DRAFT_01681 | COG_category   | [J] Translation, ribosomal structure and biogenesis               |          |
| 2558671013 | DRAFT_01681 | COG2007        | Ribosomal protein S8E                                             | 5.00E-23 |
| 2558671013 | DRAFT_01681 | pfam01201      | Ribosomal_S8e                                                     | 2.90E-23 |
| 2558671013 | DRAFT_01681 | TIGR00307      | ribosomal protein S8.e                                            | 9.30E-31 |
| 2558671013 | DRAFT_01681 | KO:K02995      | small subunit ribosomal protein S8e                               | 8.30E-31 |
| 2558671013 | DRAFT_01681 | Locus_type     | CDS                                                               |          |
| 2558671013 | DRAFT_01681 | Product_name   | ribosomal protein S8.e                                            |          |
| 2558671013 | DRAFT_01681 | Scaffold       | DRAFT_contig_70_700_len_9743_read_count_155629.52                 |          |
| 2558671013 | DRAFT_01681 | Coordinates    | 8905..9402(+)                                                     |          |
| 2558671013 | DRAFT_01681 | DNA_length     | 498bp                                                             |          |
| 2558671013 | DRAFT_01681 | Protein_length | 165aa                                                             |          |
| 2558671013 | DRAFT_01681 | GC             |                                                                   | 0.58     |
|            |             |                |                                                                   |          |
| 2558671014 | DRAFT_01682 | COG_category   | [U] Intracellular trafficking, secretion, and vesicular transport |          |
| 2558671014 | DRAFT_01682 | COG1400        | Signal recognition particle 19 kDa protein                        | 3.00E-10 |
| 2558671014 | DRAFT_01682 | pfam01922      | SRP19                                                             | 5.90E-17 |
| 2558671014 | DRAFT_01682 | KO:K03105      | signal recognition particle subunit SRP19                         | 4.40E-12 |
| 2558671014 | DRAFT_01682 | Locus_type     | CDS                                                               |          |
| 2558671014 | DRAFT_01682 | Product_name   | Signal recognition particle 19 kDa protein                        |          |
| 2558671014 | DRAFT_01682 | Scaffold       | DRAFT_contig_70_700_len_9743_read_count_155629.52                 |          |
| 2558671014 | DRAFT_01682 | Coordinates    | 9403..9732(+)                                                     |          |
| 2558671014 | DRAFT_01682 | DNA_length     | 330bp                                                             |          |
| 2558671014 | DRAFT_01682 | Protein_length | 109aa                                                             |          |
| 2558671014 | DRAFT_01682 | GC             |                                                                   | 0.56     |



|            |             |                |                                                    |          |
|------------|-------------|----------------|----------------------------------------------------|----------|
| 2558671015 | DRAFT_01683 | Locus_type     | CDS                                                |          |
| 2558671015 | DRAFT_01683 | Product_name   | hypothetical protein                               |          |
| 2558671015 | DRAFT_01683 | Scaffold       | DRAFT_contig_70_711_len_9632_read_count_162759.53  |          |
| 2558671015 | DRAFT_01683 | Coordinates    | 204..614(+)                                        |          |
| 2558671015 | DRAFT_01683 | DNA_length     | 411bp                                              |          |
| 2558671015 | DRAFT_01683 | Protein_length | 136aa                                              |          |
| 2558671015 | DRAFT_01683 | GC             |                                                    | 0.52     |
|            |             |                |                                                    |          |
| 2558671016 | DRAFT_01684 | Locus_type     | CDS                                                |          |
| 2558671016 | DRAFT_01684 | Product_name   | hypothetical protein                               |          |
| 2558671016 | DRAFT_01684 | Scaffold       | DRAFT_contig_70_711_len_9632_read_count_162759.53  |          |
| 2558671016 | DRAFT_01684 | Coordinates    | 940..1371(-)                                       |          |
| 2558671016 | DRAFT_01684 | DNA_length     | 432bp                                              |          |
| 2558671016 | DRAFT_01684 | Protein_length | 143aa                                              |          |
| 2558671016 | DRAFT_01684 | GC             |                                                    | 0.53     |
|            |             |                |                                                    |          |
| 2558671017 | DRAFT_01685 | pfam05594      | Fil_haemagg                                        | 9.10E+01 |
| 2558671017 | DRAFT_01685 | pfam05594      | Fil_haemagg                                        | 1.50E-01 |
| 2558671017 | DRAFT_01685 | pfam05594      | Fil_haemagg                                        | 7.50E-02 |
| 2558671017 | DRAFT_01685 | pfam05594      | Fil_haemagg                                        | 2.60E+00 |
| 2558671017 | DRAFT_01685 | TIGR01731      | adhesin HecA family 20-residue repeat (two copies) | 2.30E-04 |
| 2558671017 | DRAFT_01685 | Locus_type     | CDS                                                |          |
| 2558671017 | DRAFT_01685 | Product_name   | Haemagglutinin repeat                              |          |
| 2558671017 | DRAFT_01685 | Scaffold       | DRAFT_contig_70_711_len_9632_read_count_162759.53  |          |
| 2558671017 | DRAFT_01685 | Coordinates    | 1796..3256(+)                                      |          |
| 2558671017 | DRAFT_01685 | DNA_length     | 1461bp                                             |          |
| 2558671017 | DRAFT_01685 | Protein_length | 486aa                                              |          |
| 2558671017 | DRAFT_01685 | GC             |                                                    | 0.5      |
| 2558671017 | DRAFT_01685 | Signal_peptide | Yes                                                |          |
| 2558671017 | DRAFT_01685 | Transmembrane  | Yes                                                |          |
|            |             |                |                                                    |          |
| 2558671018 | DRAFT_01686 | KEGG_module    | M00360: Aminoacyl-tRNA biosynthesis, prokaryotes   |          |
| 2558671018 | DRAFT_01686 | KEGG_module    | M00359: Aminoacyl-tRNA biosynthesis, eukaryotes    |          |

|            |             |                |                                                   |           |
|------------|-------------|----------------|---------------------------------------------------|-----------|
| 2558671018 | DRAFT_01686 | Metacyc        | TRNA-CHARGING-PWY: tRNA charging                  |           |
| 2558671018 | DRAFT_01686 | IMG_pathway    | 492: Glycine ligation to tRNA(Gly)                |           |
| 2558671018 | DRAFT_01686 | pfam03129      | HGTP_anticodon                                    | 8.40E-19  |
| 2558671018 | DRAFT_01686 | pfam00587      | tRNA-synt_2b                                      | 1.90E-43  |
| 2558671018 | DRAFT_01686 | EC:6.1.1.14    | Glycine--tRNA ligase.                             |           |
| 2558671018 | DRAFT_01686 | TIGR00389      | glycyl-tRNA synthetase, dimeric type              | 2.00E-106 |
| 2558671018 | DRAFT_01686 | KO:K01880      | glycyl-tRNA synthetase [EC:6.1.1.14]              | 0.00E+00  |
| 2558671018 | DRAFT_01686 | ITERM:01945    | glycyl-tRNA synthetase (EC 6.1.1.14)              |           |
| 2558671018 | DRAFT_01686 | Locus_type     | CDS                                               |           |
| 2558671018 | DRAFT_01686 | Product_name   | glycyl-tRNA synthetase (EC 6.1.1.14)              |           |
| 2558671018 | DRAFT_01686 | Scaffold       | DRAFT_contig_70_711_len_9632_read_count_162759.53 |           |
| 2558671018 | DRAFT_01686 | Coordinates    | 3634..5097(+)                                     |           |
| 2558671018 | DRAFT_01686 | DNA_length     | 1464bp                                            |           |
| 2558671018 | DRAFT_01686 | Protein_length | 487aa                                             |           |
| 2558671018 | DRAFT_01686 | GC             |                                                   | 0.57      |
|            |             |                |                                                   |           |
| 2558671019 | DRAFT_01687 | COG_category   | [S] Function unknown                              |           |
| 2558671019 | DRAFT_01687 | COG1836        | Predicted membrane protein                        | 2.00E-30  |
| 2558671019 | DRAFT_01687 | pfam01940      | DUF92                                             | 1.80E-56  |
| 2558671019 | DRAFT_01687 | TIGR00297      | TIGR00297 family protein                          | 3.80E-45  |
| 2558671019 | DRAFT_01687 | Locus_type     | CDS                                               |           |
| 2558671019 | DRAFT_01687 | Product_name   | Predicted membrane protein                        |           |
| 2558671019 | DRAFT_01687 | Scaffold       | DRAFT_contig_70_711_len_9632_read_count_162759.53 |           |
| 2558671019 | DRAFT_01687 | Coordinates    | 5081..5896(-)                                     |           |
| 2558671019 | DRAFT_01687 | DNA_length     | 816bp                                             |           |
| 2558671019 | DRAFT_01687 | Protein_length | 271aa                                             |           |
| 2558671019 | DRAFT_01687 | GC             |                                                   | 0.56      |
| 2558671019 | DRAFT_01687 | Transmembrane  | Yes                                               |           |
|            |             |                |                                                   |           |
| 2558671020 | DRAFT_01688 | Locus_type     | CDS                                               |           |
| 2558671020 | DRAFT_01688 | Product_name   | hypothetical protein                              |           |
| 2558671020 | DRAFT_01688 | Scaffold       | DRAFT_contig_70_711_len_9632_read_count_162759.53 |           |
| 2558671020 | DRAFT_01688 | Coordinates    | 5979..6971(-)                                     |           |
| 2558671020 | DRAFT_01688 | DNA_length     | 993bp                                             |           |

|            |             |                |                                                                              |                                                                              |          |
|------------|-------------|----------------|------------------------------------------------------------------------------|------------------------------------------------------------------------------|----------|
| 2558671020 | DRAFT_01688 | Protein_length |                                                                              | 330aa                                                                        |          |
| 2558671020 | DRAFT_01688 | GC             |                                                                              |                                                                              | 0.59     |
| 2558671021 | DRAFT_01689 | COG_category   | [K] Transcription                                                            |                                                                              |          |
| 2558671021 | DRAFT_01689 | COG1405        | Transcription initiation factor TFIIIB, Brf1 subunit/Transcription initiatic |                                                                              | 2.00E-74 |
| 2558671021 | DRAFT_01689 | pfam08271      | TF_Zn_Ribbon                                                                 |                                                                              | 3.60E-12 |
| 2558671021 | DRAFT_01689 | pfam00382      | TFIIB                                                                        |                                                                              | 8.50E-18 |
| 2558671021 | DRAFT_01689 | pfam00382      | TFIIB                                                                        |                                                                              | 7.90E-20 |
| 2558671021 | DRAFT_01689 | KO:K03124      | transcription initiation factor TFIIIB                                       |                                                                              | 0.00E+00 |
| 2558671021 | DRAFT_01689 | Locus_type     |                                                                              | CDS                                                                          |          |
| 2558671021 | DRAFT_01689 | Product_name   |                                                                              | Transcription initiation factor TFIIIB, Brf1 subunit/Transcription initiatic |          |
| 2558671021 | DRAFT_01689 | Scaffold       |                                                                              | DRAFT_contig_70_711_len_9632_read_count_162759.53                            |          |
| 2558671021 | DRAFT_01689 | Coordinates    |                                                                              | 7073..8101(+)                                                                |          |
| 2558671021 | DRAFT_01689 | DNA_length     |                                                                              | 1029bp                                                                       |          |
| 2558671021 | DRAFT_01689 | Protein_length |                                                                              | 342aa                                                                        |          |
| 2558671021 | DRAFT_01689 | GC             |                                                                              |                                                                              | 0.56     |
| 2558671021 | DRAFT_01689 | Transmembrane  |                                                                              | Yes                                                                          |          |
| 2558671022 | DRAFT_01690 | pfam02517      | Abi                                                                          |                                                                              | 2.40E-09 |
| 2558671022 | DRAFT_01690 | Locus_type     |                                                                              | CDS                                                                          |          |
| 2558671022 | DRAFT_01690 | Product_name   |                                                                              | CAAX protease self-immunity                                                  |          |
| 2558671022 | DRAFT_01690 | Scaffold       |                                                                              | DRAFT_contig_70_711_len_9632_read_count_162759.53                            |          |
| 2558671022 | DRAFT_01690 | Coordinates    |                                                                              | 8265..9296(-)                                                                |          |
| 2558671022 | DRAFT_01690 | DNA_length     |                                                                              | 1032bp                                                                       |          |
| 2558671022 | DRAFT_01690 | Protein_length |                                                                              | 343aa                                                                        |          |
| 2558671022 | DRAFT_01690 | GC             |                                                                              |                                                                              | 0.6      |
| 2558671022 | DRAFT_01690 | Transmembrane  |                                                                              | Yes                                                                          |          |
| 2558671023 | DRAFT_01691 | Locus_type     |                                                                              | CDS                                                                          |          |
| 2558671023 | DRAFT_01691 | Product_name   |                                                                              | hypothetical protein                                                         |          |
| 2558671023 | DRAFT_01691 | Scaffold       |                                                                              | DRAFT_contig_70_711_len_9632_read_count_162759.53                            |          |
| 2558671023 | DRAFT_01691 | Coordinates    |                                                                              | 9299..9631(-)                                                                |          |
| 2558671023 | DRAFT_01691 | DNA_length     |                                                                              | 333bp                                                                        |          |
| 2558671023 | DRAFT_01691 | Protein_length |                                                                              | 110aa                                                                        |          |

|            |             |                |                                                                    |           |
|------------|-------------|----------------|--------------------------------------------------------------------|-----------|
| 2558671023 | DRAFT_01691 | GC             |                                                                    | 0.56      |
| 2558671024 | DRAFT_01692 | COG_category   | [L] Replication, recombination and repair                          |           |
| 2558671024 | DRAFT_01692 | COG0417        | DNA polymerase elongation subunit (family B)                       | 7.00E-105 |
| 2558671024 | DRAFT_01692 | pfam00136      | DNA_pol_B                                                          | 3.30E-77  |
| 2558671024 | DRAFT_01692 | pfam03104      | DNA_pol_B_exo1                                                     | 4.10E-31  |
| 2558671024 | DRAFT_01692 | EC:2.7.7.7     | DNA-directed DNA polymerase.                                       |           |
| 2558671024 | DRAFT_01692 | KO:K02319      | DNA polymerase I [EC:2.7.7.7]                                      | 0.00E+00  |
| 2558671024 | DRAFT_01692 | Locus_type     | CDS                                                                |           |
| 2558671024 | DRAFT_01692 | Product_name   | DNA polymerase elongation subunit (family B)                       |           |
| 2558671024 | DRAFT_01692 | Scaffold       | DRAFT_contig_70_728_len_9512_read_count_148120.54                  |           |
| 2558671024 | DRAFT_01692 | Coordinates    | 237..2777(-)                                                       |           |
| 2558671024 | DRAFT_01692 | DNA_length     | 2541bp                                                             |           |
| 2558671024 | DRAFT_01692 | Protein_length | 846aa                                                              |           |
| 2558671024 | DRAFT_01692 | GC             |                                                                    | 0.57      |
| 2558671025 | DRAFT_01693 | Locus_type     | CDS                                                                |           |
| 2558671025 | DRAFT_01693 | Product_name   | hypothetical protein                                               |           |
| 2558671025 | DRAFT_01693 | Scaffold       | DRAFT_contig_70_728_len_9512_read_count_148120.54                  |           |
| 2558671025 | DRAFT_01693 | Coordinates    | 2879..3247(+)                                                      |           |
| 2558671025 | DRAFT_01693 | DNA_length     | 369bp                                                              |           |
| 2558671025 | DRAFT_01693 | Protein_length | 122aa                                                              |           |
| 2558671025 | DRAFT_01693 | GC             |                                                                    | 0.55      |
| 2558671025 | DRAFT_01693 | Transmembrane  | Yes                                                                |           |
| 2558671026 | DRAFT_01694 | COG_category   | [M] Cell wall/membrane/envelope biogenesis                         |           |
| 2558671026 | DRAFT_01694 | COG0399        | Predicted pyridoxal phosphate-dependent enzyme apparently involved | 3.00E-106 |
| 2558671026 | DRAFT_01694 | pfam01041      | DegT_DnrJ_EryC1                                                    | 3.40E-116 |
| 2558671026 | DRAFT_01694 | Locus_type     | CDS                                                                |           |
| 2558671026 | DRAFT_01694 | Product_name   | Predicted pyridoxal phosphate-dependent enzyme apparently involve  |           |
| 2558671026 | DRAFT_01694 | Scaffold       | DRAFT_contig_70_728_len_9512_read_count_148120.54                  |           |
| 2558671026 | DRAFT_01694 | Coordinates    | 3448..4560(+)                                                      |           |
| 2558671026 | DRAFT_01694 | DNA_length     | 1113bp                                                             |           |
| 2558671026 | DRAFT_01694 | Protein_length | 370aa                                                              |           |

|            |             |                |                                                                                        |          |
|------------|-------------|----------------|----------------------------------------------------------------------------------------|----------|
| 2558671026 | DRAFT_01694 | GC             |                                                                                        | 0.57     |
| 2558671027 | DRAFT_01695 | Metacyc        | MANNOSYL-CHITO-DOLICHOL-BIOSYNTHESIS: dolichyl-diphosphooligosaccharide biosynthesis   |          |
| 2558671027 | DRAFT_01695 | COG_category   | [M] Cell wall/membrane/envelope biogenesis                                             |          |
| 2558671027 | DRAFT_01695 | COG0463        | Glycosyltransferases involved in cell wall biogenesis                                  | 6.00E-17 |
| 2558671027 | DRAFT_01695 | pfam00535      | Glycos_transf_2                                                                        | 7.60E-26 |
| 2558671027 | DRAFT_01695 | EC:2.4.1.83    | Dolichyl-phosphate beta-D-mannosyltransferase.                                         |          |
| 2558671027 | DRAFT_01695 | KO:K00721      | dolichol-phosphate mannosyltransferase [EC:2.4.1.83]                                   | 1.40E-45 |
| 2558671027 | DRAFT_01695 | Locus_type     | CDS                                                                                    |          |
| 2558671027 | DRAFT_01695 | Product_name   | Glycosyltransferases involved in cell wall biogenesis                                  |          |
| 2558671027 | DRAFT_01695 | Scaffold       | DRAFT_contig_70_728_len_9512_read_count_148120.54                                      |          |
| 2558671027 | DRAFT_01695 | Coordinates    | 4572..5285(+)                                                                          |          |
| 2558671027 | DRAFT_01695 | DNA_length     | 714bp                                                                                  |          |
| 2558671027 | DRAFT_01695 | Protein_length | 237aa                                                                                  |          |
| 2558671027 | DRAFT_01695 | GC             |                                                                                        | 0.59     |
| 2558671028 | DRAFT_01696 | KEGG_module    | M00184: RNA polymerase, archaea                                                        |          |
| 2558671028 | DRAFT_01696 | COG_category   | [K] Transcription                                                                      |          |
| 2558671028 | DRAFT_01696 | COG1996        | DNA-directed RNA polymerase, subunit RPC10 (contains C4-type Zn-fin                    | 1.00E-03 |
| 2558671028 | DRAFT_01696 | EC:2.7.7.6     | DNA-directed RNA polymerase.                                                           |          |
| 2558671028 | DRAFT_01696 | KO:K03059      | DNA-directed RNA polymerase subunit P [EC:2.7.7.6]                                     | 4.10E-15 |
| 2558671028 | DRAFT_01696 | Locus_type     | CDS                                                                                    |          |
| 2558671028 | DRAFT_01696 | Product_name   | DNA-directed RNA polymerase, subunit RPC10 (contains C4-type Zn-fi                     |          |
| 2558671028 | DRAFT_01696 | Scaffold       | DRAFT_contig_70_728_len_9512_read_count_148120.54                                      |          |
| 2558671028 | DRAFT_01696 | Coordinates    | 5420..5608(+)                                                                          |          |
| 2558671028 | DRAFT_01696 | DNA_length     | 189bp                                                                                  |          |
| 2558671028 | DRAFT_01696 | Protein_length | 62aa                                                                                   |          |
| 2558671028 | DRAFT_01696 | GC             |                                                                                        | 0.53     |
| 2558671029 | DRAFT_01697 | KEGG_module    | M00095: C5 isoprenoid biosynthesis, mevalonate pathway                                 |          |
| 2558671029 | DRAFT_01697 | KEGG_module    | M00088: Ketone body biosynthesis, acetyl-CoA => acetoacetate/3-hydroxybutyrate/acetone |          |
| 2558671029 | DRAFT_01697 | Metacyc        | PWY66-367: ketogenesis                                                                 |          |
| 2558671029 | DRAFT_01697 | Metacyc        | PWY-922: mevalonate pathway I                                                          |          |
| 2558671029 | DRAFT_01697 | Metacyc        | PWY-6174: mevalonate pathway II (archaea)                                              |          |

|                        |                |                                                                          |          |
|------------------------|----------------|--------------------------------------------------------------------------|----------|
| 2558671029 DRAFT_01697 | IMG_pathway    | 178: Mevalonate pathway for isopentenyl pyrophosphate synthesis          |          |
| 2558671029 DRAFT_01697 | IMG_pathway    | 591: Archaeal mevalonate pathway for isopentenyl pyrophosphate synthesis |          |
| 2558671029 DRAFT_01697 | COG_category   | [I] Lipid transport and metabolism                                       |          |
| 2558671029 DRAFT_01697 | COG3425        | 3-hydroxy-3-methylglutaryl CoA synthase                                  | 8.00E-90 |
| 2558671029 DRAFT_01697 | pfam08541      | ACP_syn_III_C                                                            | 2.20E-12 |
| 2558671029 DRAFT_01697 | EC:2.3.3.10    | Hydroxymethylglutaryl-CoA synthase.                                      |          |
| 2558671029 DRAFT_01697 | TIGR00748      | hydroxymethylglutaryl-CoA synthase, putative                             | 0.00E+00 |
| 2558671029 DRAFT_01697 | KO:K01641      | hydroxymethylglutaryl-CoA synthase [EC:2.3.3.10]                         | 0.00E+00 |
| 2558671029 DRAFT_01697 | ITERM:00461    | hydroxymethylglutaryl-CoA synthase (EC 2.3.3.10)                         |          |
| 2558671029 DRAFT_01697 | Locus_type     | CDS                                                                      |          |
| 2558671029 DRAFT_01697 | Product_name   | hydroxymethylglutaryl-CoA synthase (EC 2.3.3.10)                         |          |
| 2558671029 DRAFT_01697 | Scaffold       | DRAFT_contig_70_728_len_9512_read_count_148120.54                        |          |
| 2558671029 DRAFT_01697 | Coordinates    | 5802..6845(+)                                                            |          |
| 2558671029 DRAFT_01697 | DNA_length     | 1044bp                                                                   |          |
| 2558671029 DRAFT_01697 | Protein_length | 347aa                                                                    |          |
| 2558671029 DRAFT_01697 | GC             |                                                                          | 0.56     |

|                        |             |                                                                                        |  |
|------------------------|-------------|----------------------------------------------------------------------------------------|--|
| 2558671030 DRAFT_01698 | KEGG_module | M00374: Dicarboxylate-hydroxybutyrate cycle                                            |  |
| 2558671030 DRAFT_01698 | KEGG_module | M00088: Ketone body biosynthesis, acetyl-CoA => acetoacetate/3-hydroxybutyrate/acetone |  |
| 2558671030 DRAFT_01698 | KEGG_module | M00095: C5 isoprenoid biosynthesis, mevalonate pathway                                 |  |
| 2558671030 DRAFT_01698 | KEGG_module | M00373: Ethylmalonyl pathway                                                           |  |
| 2558671030 DRAFT_01698 | KEGG_module | M00375: Hydroxypropionate-hydroxybutylate cycle                                        |  |
| 2558671030 DRAFT_01698 | Metacyc     | PWY-5741: ethylmalonyl pathway                                                         |  |
| 2558671030 DRAFT_01698 | Metacyc     | PWY66-367: ketogenesis                                                                 |  |
| 2558671030 DRAFT_01698 | Metacyc     | ACETOACETATE-DEG-PWY: acetoacetate degradation (to acetyl CoA)                         |  |
| 2558671030 DRAFT_01698 | Metacyc     | PWY-5789: 3-hydroxypropionate/4-hydroxybutyrate cycle                                  |  |
| 2558671030 DRAFT_01698 | Metacyc     | PWY1-3: polyhydroxybutyrate biosynthesis                                               |  |
| 2558671030 DRAFT_01698 | Metacyc     | PWY-6174: mevalonate pathway II (archaea)                                              |  |
| 2558671030 DRAFT_01698 | Metacyc     | PWY-922: mevalonate pathway I                                                          |  |
| 2558671030 DRAFT_01698 | Metacyc     | PWY-5676: acetyl-CoA fermentation to butyrate II                                       |  |
| 2558671030 DRAFT_01698 | Metacyc     | PWY-6588: pyruvate fermentation to acetone                                             |  |
| 2558671030 DRAFT_01698 | Metacyc     | ILEUDEG-PWY: isoleucine degradation I                                                  |  |
| 2558671030 DRAFT_01698 | Metacyc     | PWY-6883: pyruvate fermentation to butanol II                                          |  |
| 2558671030 DRAFT_01698 | Metacyc     | PWY-5177: glutaryl-CoA degradation                                                     |  |

|            |             |                |                                                               |          |
|------------|-------------|----------------|---------------------------------------------------------------|----------|
| 2558671030 | DRAFT_01698 | Metacyc        | PWY-6863: pyruvate fermentation to hexanol                    |          |
| 2558671030 | DRAFT_01698 | Metacyc        | PWY-6583: pyruvate fermentation to butanol I                  |          |
| 2558671030 | DRAFT_01698 | Metacyc        | CENTFERM-PWY: pyruvate fermentation to butanoate              |          |
| 2558671030 | DRAFT_01698 | Metacyc        | PWY-5109: 2-methylbutyrate biosynthesis                       |          |
| 2558671030 | DRAFT_01698 | Metacyc        | PWY-6876: isopropanol biosynthesis                            |          |
| 2558671030 | DRAFT_01698 | Metacyc        | PWY-7003: glycerol degradation to butanol                     |          |
| 2558671030 | DRAFT_01698 | Metacyc        | P163-PWY: lysine fermentation to acetate and butyrate         |          |
| 2558671030 | DRAFT_01698 | Metacyc        | PWY66-368: ketolysis                                          |          |
| 2558671030 | DRAFT_01698 | COG_category   | [I] Lipid transport and metabolism                            |          |
| 2558671030 | DRAFT_01698 | COG0183        | Acetyl-CoA acetyltransferase                                  | 5.00E-54 |
| 2558671030 | DRAFT_01698 | pfam02803      | Thiolase_C                                                    | 7.50E-09 |
| 2558671030 | DRAFT_01698 | pfam00108      | Thiolase_N                                                    | 4.20E-07 |
| 2558671030 | DRAFT_01698 | EC:2.3.1.9     | Acetyl-CoA C-acetyltransferase.                               |          |
| 2558671030 | DRAFT_01698 | KO:K00626      | acetyl-CoA C-acetyltransferase [EC:2.3.1.9]                   | 0.00E+00 |
| 2558671030 | DRAFT_01698 | Locus_type     | CDS                                                           |          |
| 2558671030 | DRAFT_01698 | Product_name   | Acetyl-CoA acetyltransferase                                  |          |
| 2558671030 | DRAFT_01698 | Scaffold       | DRAFT_contig_70_728_len_9512_read_count_148120.54             |          |
| 2558671030 | DRAFT_01698 | Coordinates    | 6855..8018(+)                                                 |          |
| 2558671030 | DRAFT_01698 | DNA_length     | 1164bp                                                        |          |
| 2558671030 | DRAFT_01698 | Protein_length | 387aa                                                         |          |
| 2558671030 | DRAFT_01698 | GC             |                                                               | 0.59     |
| 2558671031 | DRAFT_01699 | COG_category   | [R] General function prediction only                          |          |
| 2558671031 | DRAFT_01699 | COG1545        | Predicted nucleic-acid-binding protein containing a Zn-ribbon | 8.00E-27 |
| 2558671031 | DRAFT_01699 | pfam01796      | DUF35                                                         | 7.70E-15 |
| 2558671031 | DRAFT_01699 | pfam12172      | DUF35_N                                                       | 1.20E-08 |
| 2558671031 | DRAFT_01699 | Locus_type     | CDS                                                           |          |
| 2558671031 | DRAFT_01699 | Product_name   | Predicted nucleic-acid-binding protein containing a Zn-ribbon |          |
| 2558671031 | DRAFT_01699 | Scaffold       | DRAFT_contig_70_728_len_9512_read_count_148120.54             |          |
| 2558671031 | DRAFT_01699 | Coordinates    | 8019..8408(+)                                                 |          |
| 2558671031 | DRAFT_01699 | DNA_length     | 390bp                                                         |          |
| 2558671031 | DRAFT_01699 | Protein_length | 129aa                                                         |          |
| 2558671031 | DRAFT_01699 | GC             |                                                               | 0.54     |

|            |             |                |                 |                                                                 |          |
|------------|-------------|----------------|-----------------|-----------------------------------------------------------------|----------|
| 2558671032 | DRAFT_01700 | pfam13632      | Glyco_trans_2_3 |                                                                 | 5.20E-19 |
| 2558671032 | DRAFT_01700 | Locus_type     |                 | CDS                                                             |          |
| 2558671032 | DRAFT_01700 | Product_name   |                 | Glycosyltransferases, probably involved in cell wall biogenesis |          |
| 2558671032 | DRAFT_01700 | Scaffold       |                 | DRAFT_contig_70_728_len_9512_read_count_148120.54               |          |
| 2558671032 | DRAFT_01700 | Coordinates    |                 | 8679..9509(+)                                                   |          |
| 2558671032 | DRAFT_01700 | DNA_length     |                 | 831bp                                                           |          |
| 2558671032 | DRAFT_01700 | Protein_length |                 | 277aa                                                           |          |
| 2558671032 | DRAFT_01700 | GC             |                 |                                                                 | 0.54     |
| 2558671033 | DRAFT_01701 | Locus_type     |                 | CDS                                                             |          |
| 2558671033 | DRAFT_01701 | Product_name   |                 | hypothetical protein                                            |          |
| 2558671033 | DRAFT_01701 | Scaffold       |                 | DRAFT_contig_70_800_len_9042_read_count_162732.55               |          |
| 2558671033 | DRAFT_01701 | Coordinates    |                 | 1..168(+)                                                       |          |
| 2558671033 | DRAFT_01701 | DNA_length     |                 | 168bp                                                           |          |
| 2558671033 | DRAFT_01701 | Protein_length |                 | 55aa                                                            |          |
| 2558671033 | DRAFT_01701 | GC             |                 |                                                                 | 0.56     |
| 2558671033 | DRAFT_01701 | Transmembrane  |                 | Yes                                                             |          |
| 2558671034 | DRAFT_01702 | pfam08423      | Rad51           |                                                                 | 7.80E-07 |
| 2558671034 | DRAFT_01702 | Locus_type     |                 | CDS                                                             |          |
| 2558671034 | DRAFT_01702 | Product_name   |                 | Rad51                                                           |          |
| 2558671034 | DRAFT_01702 | Scaffold       |                 | DRAFT_contig_70_800_len_9042_read_count_162732.55               |          |
| 2558671034 | DRAFT_01702 | Coordinates    |                 | 199..1143(+)                                                    |          |
| 2558671034 | DRAFT_01702 | DNA_length     |                 | 945bp                                                           |          |
| 2558671034 | DRAFT_01702 | Protein_length |                 | 314aa                                                           |          |
| 2558671034 | DRAFT_01702 | GC             |                 |                                                                 | 0.61     |
| 2558671035 | DRAFT_01703 | Locus_type     |                 | CDS                                                             |          |
| 2558671035 | DRAFT_01703 | Product_name   |                 | hypothetical protein                                            |          |
| 2558671035 | DRAFT_01703 | Scaffold       |                 | DRAFT_contig_70_800_len_9042_read_count_162732.55               |          |
| 2558671035 | DRAFT_01703 | Coordinates    |                 | 1143..1412(+)                                                   |          |
| 2558671035 | DRAFT_01703 | DNA_length     |                 | 270bp                                                           |          |
| 2558671035 | DRAFT_01703 | Protein_length |                 | 89aa                                                            |          |
| 2558671035 | DRAFT_01703 | GC             |                 |                                                                 | 0.6      |



|            |             |                |                                                   |          |
|------------|-------------|----------------|---------------------------------------------------|----------|
| 2558671036 | DRAFT_01704 | Locus_type     | CDS                                               |          |
| 2558671036 | DRAFT_01704 | Product_name   | hypothetical protein                              |          |
| 2558671036 | DRAFT_01704 | Scaffold       | DRAFT_contig_70_800_len_9042_read_count_162732.55 |          |
| 2558671036 | DRAFT_01704 | Coordinates    | 1409..1675(+)                                     |          |
| 2558671036 | DRAFT_01704 | DNA_length     | 267bp                                             |          |
| 2558671036 | DRAFT_01704 | Protein_length | 88aa                                              |          |
| 2558671036 | DRAFT_01704 | GC             |                                                   | 0.59     |
|            |             |                |                                                   |          |
| 2558671037 | DRAFT_01705 | COG_category   | [L] Replication, recombination and repair         |          |
| 2558671037 | DRAFT_01705 | COG0417        | DNA polymerase elongation subunit (family B)      | 1.00E-87 |
| 2558671037 | DRAFT_01705 | pfam03104      | DNA_pol_B_exo1                                    | 5.40E-05 |
| 2558671037 | DRAFT_01705 | pfam00136      | DNA_pol_B                                         | 1.00E-36 |
| 2558671037 | DRAFT_01705 | EC:2.7.7.7     | DNA-directed DNA polymerase.                      |          |
| 2558671037 | DRAFT_01705 | KO:K02319      | DNA polymerase I [EC:2.7.7.7]                     | 0.00E+00 |
| 2558671037 | DRAFT_01705 | Locus_type     | CDS                                               |          |
| 2558671037 | DRAFT_01705 | Product_name   | DNA polymerase elongation subunit (family B)      |          |
| 2558671037 | DRAFT_01705 | Scaffold       | DRAFT_contig_70_800_len_9042_read_count_162732.55 |          |
| 2558671037 | DRAFT_01705 | Coordinates    | 1656..3911(+)                                     |          |
| 2558671037 | DRAFT_01705 | DNA_length     | 2256bp                                            |          |
| 2558671037 | DRAFT_01705 | Protein_length | 751aa                                             |          |
| 2558671037 | DRAFT_01705 | GC             |                                                   | 0.57     |
|            |             |                |                                                   |          |
| 2558671038 | DRAFT_01706 | pfam01243      | Pyridox_oxidase                                   | 6.40E-22 |
| 2558671038 | DRAFT_01706 | TIGR03618      | PPOX class probable F420-dependent enzyme         | 9.00E-24 |
| 2558671038 | DRAFT_01706 | Locus_type     | CDS                                               |          |
| 2558671038 | DRAFT_01706 | Product_name   | Predicted flavin-nucleotide-binding protein       |          |
| 2558671038 | DRAFT_01706 | Scaffold       | DRAFT_contig_70_800_len_9042_read_count_162732.55 |          |
| 2558671038 | DRAFT_01706 | Coordinates    | 3924..4313(-)                                     |          |
| 2558671038 | DRAFT_01706 | DNA_length     | 390bp                                             |          |
| 2558671038 | DRAFT_01706 | Protein_length | 129aa                                             |          |
| 2558671038 | DRAFT_01706 | GC             |                                                   | 0.53     |
|            |             |                |                                                   |          |
| 2558671039 | DRAFT_01707 | Locus_type     | tRNA                                              |          |

|            |             |                |                                                                          |          |
|------------|-------------|----------------|--------------------------------------------------------------------------|----------|
| 2558671039 | DRAFT_01707 | Product_name   | tRNA_Thr_GGT                                                             |          |
| 2558671039 | DRAFT_01707 | Scaffold       | DRAFT_contig_70_800_len_9042_read_count_162732.55                        |          |
| 2558671039 | DRAFT_01707 | Coordinates    | 4355..4428(-)                                                            |          |
| 2558671039 | DRAFT_01707 | DNA_length     | 74bp                                                                     |          |
| 2558671039 | DRAFT_01707 | GC             |                                                                          | 0.62     |
|            |             |                |                                                                          |          |
| 2558671040 | DRAFT_01708 | Locus_type     | CDS                                                                      |          |
| 2558671040 | DRAFT_01708 | Product_name   | hypothetical protein                                                     |          |
| 2558671040 | DRAFT_01708 | Scaffold       | DRAFT_contig_70_800_len_9042_read_count_162732.55                        |          |
| 2558671040 | DRAFT_01708 | Coordinates    | 4980..5105(+)                                                            |          |
| 2558671040 | DRAFT_01708 | DNA_length     | 126bp                                                                    |          |
| 2558671040 | DRAFT_01708 | Protein_length | 41aa                                                                     |          |
| 2558671040 | DRAFT_01708 | GC             |                                                                          | 0.48     |
| 2558671040 | DRAFT_01708 | Transmembrane  | Yes                                                                      |          |
|            |             |                |                                                                          |          |
| 2558671041 | DRAFT_01709 | KEGG_module    | M00288: RPA complex                                                      |          |
| 2558671041 | DRAFT_01709 | COG_category   | [L] Replication, recombination and repair                                |          |
| 2558671041 | DRAFT_01709 | COG1599        | Single-stranded DNA-binding replication protein A (RPA), large (70 kD) : | 4.00E-09 |
| 2558671041 | DRAFT_01709 | KO:K07466      | replication factor A1                                                    | 0.00E+00 |
| 2558671041 | DRAFT_01709 | Locus_type     | CDS                                                                      |          |
| 2558671041 | DRAFT_01709 | Product_name   | Single-stranded DNA-binding replication protein A (RPA), large (70 kD)   |          |
| 2558671041 | DRAFT_01709 | Scaffold       | DRAFT_contig_70_800_len_9042_read_count_162732.55                        |          |
| 2558671041 | DRAFT_01709 | Coordinates    | 5102..6505(-)                                                            |          |
| 2558671041 | DRAFT_01709 | DNA_length     | 1404bp                                                                   |          |
| 2558671041 | DRAFT_01709 | Protein_length | 467aa                                                                    |          |
| 2558671041 | DRAFT_01709 | GC             |                                                                          | 0.56     |
|            |             |                |                                                                          |          |
| 2558671042 | DRAFT_01710 | KEGG_module    | M00027: GABA (gamma-Aminobutyrate) shunt                                 |          |
| 2558671042 | DRAFT_01710 | Metacyc        | BETA-ALA-DEGRADATION-I-PWY: &beta;-alanine degradation I                 |          |
| 2558671042 | DRAFT_01710 | Metacyc        | PWY-6537: 4-aminobutyrate degradation II                                 |          |
| 2558671042 | DRAFT_01710 | Metacyc        | PWY-6536: 4-aminobutyrate degradation III                                |          |
| 2558671042 | DRAFT_01710 | Metacyc        | GLUDEG-I-PWY: glutamate degradation III (via 4-aminobutyrate)            |          |
| 2558671042 | DRAFT_01710 | Metacyc        | PWY-5022: 4-aminobutyrate degradation V                                  |          |
| 2558671042 | DRAFT_01710 | Metacyc        | P181-PWY: nicotine degradation I                                         |          |

|            |             |                |                                                                     |           |
|------------|-------------|----------------|---------------------------------------------------------------------|-----------|
| 2558671042 | DRAFT_01710 | Metacyc        | PWY-6535: 4-aminobutyrate degradation I                             |           |
| 2558671042 | DRAFT_01710 | Metacyc        | PWY-4321: glutamate degradation IV                                  |           |
| 2558671042 | DRAFT_01710 | COG_category   | [E] Amino acid transport and metabolism                             |           |
| 2558671042 | DRAFT_01710 | COG0160        | 4-aminobutyrate aminotransferase and related aminotransferases      | 0.00E+00  |
| 2558671042 | DRAFT_01710 | pfam00202      | Aminotran_3                                                         | 2.10E-97  |
| 2558671042 | DRAFT_01710 | EC:2.6.1.19    | 4-aminobutyrate--2-oxoglutarate transaminase.                       |           |
| 2558671042 | DRAFT_01710 | TIGR00700      | 4-aminobutyrate aminotransferase, prokaryotic type                  | 2.60E-112 |
| 2558671042 | DRAFT_01710 | KO:K00823      | 4-aminobutyrate aminotransferase [EC:2.6.1.19]                      | 0.00E+00  |
| 2558671042 | DRAFT_01710 | Locus_type     | CDS                                                                 |           |
| 2558671042 | DRAFT_01710 | Product_name   | 4-aminobutyrate aminotransferase and related aminotransferases      |           |
| 2558671042 | DRAFT_01710 | Scaffold       | DRAFT_contig_70_800_len_9042_read_count_162732.55                   |           |
| 2558671042 | DRAFT_01710 | Coordinates    | 6509..7861(-)                                                       |           |
| 2558671042 | DRAFT_01710 | DNA_length     | 1353bp                                                              |           |
| 2558671042 | DRAFT_01710 | Protein_length | 450aa                                                               |           |
| 2558671042 | DRAFT_01710 | GC             |                                                                     | 0.55      |
| 2558671043 | DRAFT_01711 | IMG_pathway    | 433: Archaeal nucleoid proteins                                     |           |
| 2558671043 | DRAFT_01711 | COG_category   | [K] Transcription                                                   |           |
| 2558671043 | DRAFT_01711 | COG1581        | Archaeal DNA-binding protein                                        | 1.00E-16  |
| 2558671043 | DRAFT_01711 | pfam01918      | Alba                                                                | 5.30E-11  |
| 2558671043 | DRAFT_01711 | TIGR00285      | DNA-binding protein Alba                                            | 5.00E-28  |
| 2558671043 | DRAFT_01711 | KO:K03622      | archaea-specific DNA-binding protein                                | 6.60E-17  |
| 2558671043 | DRAFT_01711 | ITERM:00143    | nucleoid protein Alba                                               |           |
| 2558671043 | DRAFT_01711 | Locus_type     | CDS                                                                 |           |
| 2558671043 | DRAFT_01711 | Product_name   | nucleoid protein Alba                                               |           |
| 2558671043 | DRAFT_01711 | Scaffold       | DRAFT_contig_70_800_len_9042_read_count_162732.55                   |           |
| 2558671043 | DRAFT_01711 | Coordinates    | 7903..8187(-)                                                       |           |
| 2558671043 | DRAFT_01711 | DNA_length     | 285bp                                                               |           |
| 2558671043 | DRAFT_01711 | Protein_length | 94aa                                                                |           |
| 2558671043 | DRAFT_01711 | GC             |                                                                     | 0.52      |
| 2558671044 | DRAFT_01712 | COG_category   | [O] Posttranslational modification, protein turnover, chaperones    |           |
| 2558671044 | DRAFT_01712 | COG0652        | Peptidyl-prolyl cis-trans isomerase (rotamase) - cyclophilin family | 2.00E-31  |
| 2558671044 | DRAFT_01712 | pfam00160      | Pro_isomerase                                                       | 4.10E-37  |

|            |             |                |                                                                     |          |
|------------|-------------|----------------|---------------------------------------------------------------------|----------|
| 2558671044 | DRAFT_01712 | EC:5.2.1.8     | Peptidylprolyl isomerase.                                           |          |
| 2558671044 | DRAFT_01712 | KO:K01802      | peptidylprolyl isomerase [EC:5.2.1.8]                               | 3.60E-23 |
| 2558671044 | DRAFT_01712 | Locus_type     | CDS                                                                 |          |
| 2558671044 | DRAFT_01712 | Product_name   | Peptidyl-prolyl cis-trans isomerase (rotamase) - cyclophilin family |          |
| 2558671044 | DRAFT_01712 | Scaffold       | DRAFT_contig_70_800_len_9042_read_count_162732.55                   |          |
| 2558671044 | DRAFT_01712 | Coordinates    | 8284..8979(+)                                                       |          |
| 2558671044 | DRAFT_01712 | DNA_length     | 696bp                                                               |          |
| 2558671044 | DRAFT_01712 | Protein_length | 231aa                                                               |          |
| 2558671044 | DRAFT_01712 | GC             |                                                                     | 0.51     |
| 2558671044 | DRAFT_01712 | Transmembrane  | Yes                                                                 |          |
| 2558671045 | DRAFT_01713 | IMG_pathway    | 433: Archaeal nucleoid proteins                                     |          |
| 2558671045 | DRAFT_01713 | COG_category   | [K] Transcription                                                   |          |
| 2558671045 | DRAFT_01713 | COG1581        | Archaeal DNA-binding protein                                        | 2.00E-15 |
| 2558671045 | DRAFT_01713 | pfam01918      | Alba                                                                | 7.60E-16 |
| 2558671045 | DRAFT_01713 | TIGR00285      | DNA-binding protein Alba                                            | 4.50E-28 |
| 2558671045 | DRAFT_01713 | KO:K03622      | archaea-specific DNA-binding protein                                | 1.60E-15 |
| 2558671045 | DRAFT_01713 | ITERM:00143    | nucleoid protein Alba                                               |          |
| 2558671045 | DRAFT_01713 | Locus_type     | CDS                                                                 |          |
| 2558671045 | DRAFT_01713 | Product_name   | nucleoid protein Alba                                               |          |
| 2558671045 | DRAFT_01713 | Scaffold       | DRAFT_contig_70_809_len_8972_read_count_133314.56                   |          |
| 2558671045 | DRAFT_01713 | Coordinates    | 172..450(+)                                                         |          |
| 2558671045 | DRAFT_01713 | DNA_length     | 279bp                                                               |          |
| 2558671045 | DRAFT_01713 | Protein_length | 92aa                                                                |          |
| 2558671045 | DRAFT_01713 | GC             |                                                                     | 0.54     |
| 2558671046 | DRAFT_01714 | COG_category   | [L] Replication, recombination and repair                           |          |
| 2558671046 | DRAFT_01714 | COG2827        | Predicted endonuclease containing a URI domain                      | 1.00E-24 |
| 2558671046 | DRAFT_01714 | pfam01541      | GIY-YIG                                                             | 3.70E-10 |
| 2558671046 | DRAFT_01714 | KO:K07461      | putative endonuclease                                               | 1.70E-21 |
| 2558671046 | DRAFT_01714 | Locus_type     | CDS                                                                 |          |
| 2558671046 | DRAFT_01714 | Product_name   | Predicted endonuclease containing a URI domain                      |          |
| 2558671046 | DRAFT_01714 | Scaffold       | DRAFT_contig_70_809_len_8972_read_count_133314.56                   |          |
| 2558671046 | DRAFT_01714 | Coordinates    | 491..766(-)                                                         |          |

|            |             |                |                                                                              |          |
|------------|-------------|----------------|------------------------------------------------------------------------------|----------|
| 2558671046 | DRAFT_01714 | DNA_length     | 276bp                                                                        |          |
| 2558671046 | DRAFT_01714 | Protein_length | 91aa                                                                         |          |
| 2558671046 | DRAFT_01714 | GC             |                                                                              | 0.56     |
| 2558671047 | DRAFT_01715 | KEGG_module    | M00002: Glycolysis, core module involving three-carbon compounds             |          |
| 2558671047 | DRAFT_01715 | Metacyc        | P122-PWY: heterolactic fermentation                                          |          |
| 2558671047 | DRAFT_01715 | Metacyc        | PWY-1622: formaldehyde assimilation I (serine pathway)                       |          |
| 2558671047 | DRAFT_01715 | Metacyc        | GLYCOLYSIS: glycolysis I                                                     |          |
| 2558671047 | DRAFT_01715 | Metacyc        | PWY-5484: glycolysis II (from fructose-6P)                                   |          |
| 2558671047 | DRAFT_01715 | Metacyc        | PWY-7003: glycerol degradation to butanol                                    |          |
| 2558671047 | DRAFT_01715 | Metacyc        | P341-PWY: glycolysis V (Pyrococcus)                                          |          |
| 2558671047 | DRAFT_01715 | Metacyc        | PWY-6886: 1-butanol autotrophic biosynthesis                                 |          |
| 2558671047 | DRAFT_01715 | Metacyc        | ANAGLYCOLYSIS-PWY: glycolysis III (glucokinase)                              |          |
| 2558671047 | DRAFT_01715 | Metacyc        | PWY-6901: xylose degradation IV                                              |          |
| 2558671047 | DRAFT_01715 | Metacyc        | GLUCONEO-PWY: gluconeogenesis I                                              |          |
| 2558671047 | DRAFT_01715 | Metacyc        | PWY-6142: gluconeogenesis II ( <i>Methanobacterium thermoautotrophicum</i> ) |          |
| 2558671047 | DRAFT_01715 | Metacyc        | PWY-5723: Rubisco shunt                                                      |          |
| 2558671047 | DRAFT_01715 | Metacyc        | PWY-7124: ethylene biosynthesis V                                            |          |
| 2558671047 | DRAFT_01715 | Metacyc        | PWY-1042: glycolysis IV (plant cytosol)                                      |          |
| 2558671047 | DRAFT_01715 | Metacyc        | P124-PWY: Bifidobacterium shunt                                              |          |
| 2558671047 | DRAFT_01715 | Metacyc        | PWY-2221: Entner-Doudoroff pathway III (semi-phosphorylative)                |          |
| 2558671047 | DRAFT_01715 | COG_category   | [G] Carbohydrate transport and metabolism                                    |          |
| 2558671047 | DRAFT_01715 | COG3635        | Predicted phosphoglycerate mutase, AP superfamily                            | 2.00E-88 |
| 2558671047 | DRAFT_01715 | pfam01676      | Metalloenzyme                                                                | 4.00E-22 |
| 2558671047 | DRAFT_01715 | pfam10143      | PhosphMutase                                                                 | 1.30E-45 |
| 2558671047 | DRAFT_01715 | EC:5.4.2.1     | Phosphoglycerate mutase.                                                     |          |
| 2558671047 | DRAFT_01715 | TIGR00306      | 2,3-bisphosphoglycerate-independent phosphoglycerate mutase, arch            | 5.00E-96 |
| 2558671047 | DRAFT_01715 | KO:K15635      | 2,3-bisphosphoglycerate-independent phosphoglycerate mutase [EC:5.           | 0.00E+00 |
| 2558671047 | DRAFT_01715 | Locus_type     | CDS                                                                          |          |
| 2558671047 | DRAFT_01715 | Product_name   | 2,3-bisphosphoglycerate-independent phosphoglycerate mutase, arch            |          |
| 2558671047 | DRAFT_01715 | Scaffold       | DRAFT_contig_70_809_len_8972_read_count_133314.56                            |          |
| 2558671047 | DRAFT_01715 | Coordinates    | 933..2180(-)                                                                 |          |
| 2558671047 | DRAFT_01715 | DNA_length     | 1248bp                                                                       |          |
| 2558671047 | DRAFT_01715 | Protein_length | 415aa                                                                        |          |

|            |             |                |                                                                   |          |
|------------|-------------|----------------|-------------------------------------------------------------------|----------|
| 2558671047 | DRAFT_01715 | GC             |                                                                   | 0.6      |
| 2558671048 | DRAFT_01716 | KEGG_module    | M00554: Nucleotide sugar biosynthesis, galactose => UDP-galactose |          |
| 2558671048 | DRAFT_01716 | KEGG_module    | M00362: Nucleotide sugar biosynthesis, prokaryotes                |          |
| 2558671048 | DRAFT_01716 | KEGG_module    | M00361: Nucleotide sugar biosynthesis, eukaryotes                 |          |
| 2558671048 | DRAFT_01716 | KEGG_module    | M00549: Nucleotide sugar biosynthesis, glucose => UDP-glucose     |          |
| 2558671048 | DRAFT_01716 | Metacyc        | PWY-6527: stachyose degradation                                   |          |
| 2558671048 | DRAFT_01716 | Metacyc        | COLANSYN-PWY: colanic acid building blocks biosynthesis           |          |
| 2558671048 | DRAFT_01716 | Metacyc        | PWY-6317: galactose degradation I (Leloir pathway)                |          |
| 2558671048 | DRAFT_01716 | COG_category   | [C] Energy production and conversion                              |          |
| 2558671048 | DRAFT_01716 | COG1085        | Galactose-1-phosphate uridylyltransferase                         | 4.00E-41 |
| 2558671048 | DRAFT_01716 | pfam01087      | GalP_UDP_transf                                                   | 5.80E-05 |
| 2558671048 | DRAFT_01716 | EC:2.7.7.12    | UDP-glucose--hexose-1-phosphate uridylyltransferase.              |          |
| 2558671048 | DRAFT_01716 | KO:K00965      | UDPglucose--hexose-1-phosphate uridylyltransferase [EC:2.7.7.12]  | 0.00E+00 |
| 2558671048 | DRAFT_01716 | Locus_type     | CDS                                                               |          |
| 2558671048 | DRAFT_01716 | Product_name   | Galactose-1-phosphate uridylyltransferase                         |          |
| 2558671048 | DRAFT_01716 | Scaffold       | DRAFT_contig_70_809_len_8972_read_count_133314.56                 |          |
| 2558671048 | DRAFT_01716 | Coordinates    | 2277..3311(+)                                                     |          |
| 2558671048 | DRAFT_01716 | DNA_length     | 1035bp                                                            |          |
| 2558671048 | DRAFT_01716 | Protein_length | 344aa                                                             |          |
| 2558671048 | DRAFT_01716 | GC             |                                                                   | 0.58     |
| 2558671049 | DRAFT_01717 | KEGG_module    | M00004: Pentose phosphate pathway (Pentose phosphate cycle)       |          |
| 2558671049 | DRAFT_01717 | KEGG_module    | M00001: Glycolysis (Embden-Meyerhof pathway), glucose => pyruvate |          |
| 2558671049 | DRAFT_01717 | KEGG_module    | M00114: Ascorbate biosynthesis, plants, glucose-6P => ascorbate   |          |
| 2558671049 | DRAFT_01717 | Metacyc        | PWY-5659: GDP-mannose biosynthesis                                |          |
| 2558671049 | DRAFT_01717 | Metacyc        | PWY-5054: sorbitol biosynthesis I                                 |          |
| 2558671049 | DRAFT_01717 | Metacyc        | GLYCOLYSIS: glycolysis I                                          |          |
| 2558671049 | DRAFT_01717 | Metacyc        | ANAGLYCOLYSIS-PWY: glycolysis III (glucokinase)                   |          |
| 2558671049 | DRAFT_01717 | Metacyc        | PWY-6531: mannitol cycle                                          |          |
| 2558671049 | DRAFT_01717 | Metacyc        | PWY-3861: mannitol degradation II                                 |          |
| 2558671049 | DRAFT_01717 | Metacyc        | PWY-5384: sucrose degradation IV                                  |          |
| 2558671049 | DRAFT_01717 | Metacyc        | P341-PWY: glycolysis V (Pyrococcus)                               |          |
| 2558671049 | DRAFT_01717 | Metacyc        | P124-PWY: Bifidobacterium shunt                                   |          |

|            |             |                |                                                                               |          |
|------------|-------------|----------------|-------------------------------------------------------------------------------|----------|
| 2558671049 | DRAFT_01717 | Metacyc        | ANAEROFRUCAT-PWY: homolactic fermentation                                     |          |
| 2558671049 | DRAFT_01717 | Metacyc        | RUMP-PWY: formaldehyde oxidation I                                            |          |
| 2558671049 | DRAFT_01717 | Metacyc        | SUCSYN-PWY: sucrose biosynthesis                                              |          |
| 2558671049 | DRAFT_01717 | Metacyc        | PWY-6142: gluconeogenesis II ( <i>Methanobacterium thermoautotrophicum</i> )  |          |
| 2558671049 | DRAFT_01717 | Metacyc        | PWY-3881: mannitol biosynthesis                                               |          |
| 2558671049 | DRAFT_01717 | Metacyc        | PWY-3801: sucrose degradation VI (anaerobic)                                  |          |
| 2558671049 | DRAFT_01717 | Metacyc        | MANNCAT-PWY: D-mannose degradation                                            |          |
| 2558671049 | DRAFT_01717 | Metacyc        | GLUCONEO-PWY: gluconeogenesis I                                               |          |
| 2558671049 | DRAFT_01717 | Metacyc        | PWY-882: L-ascorbate biosynthesis I (L-galactose pathway)                     |          |
| 2558671049 | DRAFT_01717 | Metacyc        | P122-PWY: heterolactic fermentation                                           |          |
| 2558671049 | DRAFT_01717 | Metacyc        | PWY-6981: chitin biosynthesis                                                 |          |
| 2558671049 | DRAFT_01717 | Metacyc        | PWY-622: starch biosynthesis                                                  |          |
| 2558671049 | DRAFT_01717 | Metacyc        | PWY-5514: UDP-N-acetyl-D-galactosamine biosynthesis II                        |          |
| 2558671049 | DRAFT_01717 | Metacyc        | PWY-621: sucrose degradation III                                              |          |
| 2558671049 | DRAFT_01717 | IMG_pathway    | 404: D-Mannose conversion to fructose-6-phosphate                             |          |
| 2558671049 | DRAFT_01717 | IMG_pathway    | 406: GDP-mannose formation from fructose 6-phosphate                          |          |
| 2558671049 | DRAFT_01717 | pfam10432      | bact-PGI_C                                                                    | 5.30E-37 |
| 2558671049 | DRAFT_01717 | EC:5.3.1.9     | Glucose-6-phosphate isomerase.                                                |          |
| 2558671049 | DRAFT_01717 | EC:5.3.1.8     | Mannose-6-phosphate isomerase.                                                |          |
| 2558671049 | DRAFT_01717 | TIGR02128      | bifunctional phosphoglucose/phosphomannose isomerase                          | 2.60E-59 |
| 2558671049 | DRAFT_01717 | KO:K15916      | glucose/mannose-6-phosphate isomerase [EC:5.3.1.9 5.3.1.8]                    | 1.90E-36 |
| 2558671049 | DRAFT_01717 | ITERM:06272    | bifunctional phosphoglucose/phosphomannose isomerase (EC 5.3.1.8; EC 5.3.1.9) |          |
| 2558671049 | DRAFT_01717 | Locus_type     | CDS                                                                           |          |
| 2558671049 | DRAFT_01717 | Product_name   | bifunctional phosphoglucose/phosphomannose isomerase (EC 5.3.1.8              |          |
| 2558671049 | DRAFT_01717 | Scaffold       | DRAFT_contig_70_809_len_8972_read_count_133314.56                             |          |
| 2558671049 | DRAFT_01717 | Coordinates    | 3315..4340(-)                                                                 |          |
| 2558671049 | DRAFT_01717 | DNA_length     | 1026bp                                                                        |          |
| 2558671049 | DRAFT_01717 | Protein_length | 341aa                                                                         |          |
| 2558671049 | DRAFT_01717 | GC             |                                                                               | 0.59     |
| 2558671050 | DRAFT_01718 | pfam13562      | NTP_transf_4                                                                  | 1.50E-07 |
| 2558671050 | DRAFT_01718 | TIGR03991      | UDP-N-acetylglucosamine diphosphorylase/glucosamine-1-phosphate I             | 8.10E-80 |
| 2558671050 | DRAFT_01718 | Locus_type     | CDS                                                                           |          |
| 2558671050 | DRAFT_01718 | Product_name   | UDP-N-acetylglucosamine diphosphorylase/glucosamine-1-phosphate               |          |

|            |             |                |                                                                    |          |
|------------|-------------|----------------|--------------------------------------------------------------------|----------|
| 2558671050 | DRAFT_01718 | Scaffold       | DRAFT_contig_70_809_len_8972_read_count_133314.56                  |          |
| 2558671050 | DRAFT_01718 | Coordinates    | 4490..5731(-)                                                      |          |
| 2558671050 | DRAFT_01718 | DNA_length     | 1242bp                                                             |          |
| 2558671050 | DRAFT_01718 | Protein_length | 413aa                                                              |          |
| 2558671050 | DRAFT_01718 | GC             |                                                                    | 0.61     |
| 2558671051 | DRAFT_01719 | KEGG_module    | M00361: Nucleotide sugar biosynthesis, eukaryotes                  |          |
| 2558671051 | DRAFT_01719 | KEGG_module    | M00362: Nucleotide sugar biosynthesis, prokaryotes                 |          |
| 2558671051 | DRAFT_01719 | KEGG_module    | M00114: Ascorbate biosynthesis, plants, glucose-6P => ascorbate    |          |
| 2558671051 | DRAFT_01719 | Metacyc        | PWY-5659: GDP-mannose biosynthesis                                 |          |
| 2558671051 | DRAFT_01719 | Metacyc        | PWY-882: L-ascorbate biosynthesis I (L-galactose pathway)          |          |
| 2558671051 | DRAFT_01719 | Metacyc        | PWY-6082: alginate biosynthesis II                                 |          |
| 2558671051 | DRAFT_01719 | Metacyc        | PWY-6073: alginate biosynthesis I                                  |          |
| 2558671051 | DRAFT_01719 | pfam00483      | NTP_transferase                                                    | 9.80E-21 |
| 2558671051 | DRAFT_01719 | EC:2.7.7.13    | Mannose-1-phosphate guanylyltransferase.                           |          |
| 2558671051 | DRAFT_01719 | KO:K00966      | mannose-1-phosphate guanylyltransferase [EC:2.7.7.13]              | 0.00E+00 |
| 2558671051 | DRAFT_01719 | Locus_type     | CDS                                                                |          |
| 2558671051 | DRAFT_01719 | Product_name   | Nucleoside-diphosphate-sugar pyrophosphorylase involved in lipopol |          |
| 2558671051 | DRAFT_01719 | Scaffold       | DRAFT_contig_70_809_len_8972_read_count_133314.56                  |          |
| 2558671051 | DRAFT_01719 | Coordinates    | 5736..6365(-)                                                      |          |
| 2558671051 | DRAFT_01719 | DNA_length     | 630bp                                                              |          |
| 2558671051 | DRAFT_01719 | Protein_length | 209aa                                                              |          |
| 2558671051 | DRAFT_01719 | GC             |                                                                    | 0.54     |
| 2558671052 | DRAFT_01720 | Locus_type     | CDS                                                                |          |
| 2558671052 | DRAFT_01720 | Product_name   | hypothetical protein                                               |          |
| 2558671052 | DRAFT_01720 | Scaffold       | DRAFT_contig_70_809_len_8972_read_count_133314.56                  |          |
| 2558671052 | DRAFT_01720 | Coordinates    | 6439..7170(-)                                                      |          |
| 2558671052 | DRAFT_01720 | DNA_length     | 732bp                                                              |          |
| 2558671052 | DRAFT_01720 | Protein_length | 243aa                                                              |          |
| 2558671052 | DRAFT_01720 | GC             |                                                                    | 0.59     |
| 2558671053 | DRAFT_01721 | Locus_type     | CDS                                                                |          |
| 2558671053 | DRAFT_01721 | Product_name   | hypothetical protein                                               |          |



|            |             |                |                                                   |          |
|------------|-------------|----------------|---------------------------------------------------|----------|
| 2558671053 | DRAFT_01721 | Scaffold       | DRAFT_contig_70_809_len_8972_read_count_133314.56 |          |
| 2558671053 | DRAFT_01721 | Coordinates    | 7306..7311(-)                                     |          |
| 2558671053 | DRAFT_01721 | DNA_length     | 6bp                                               |          |
| 2558671053 | DRAFT_01721 | Protein_length | 1aa                                               |          |
| 2558671053 | DRAFT_01721 | GC             |                                                   | 0.33     |
| 2558671054 | DRAFT_01722 | Locus_type     | CDS                                               |          |
| 2558671054 | DRAFT_01722 | Product_name   | hypothetical protein                              |          |
| 2558671054 | DRAFT_01722 | Scaffold       | DRAFT_contig_70_925_len_8329_read_count_151445.57 |          |
| 2558671054 | DRAFT_01722 | Coordinates    | 2..145(-)                                         |          |
| 2558671054 | DRAFT_01722 | DNA_length     | 144bp                                             |          |
| 2558671054 | DRAFT_01722 | Protein_length | 48aa                                              |          |
| 2558671054 | DRAFT_01722 | GC             |                                                   | 0.54     |
| 2558671054 | DRAFT_01722 | Transmembrane  | Yes                                               |          |
| 2558671055 | DRAFT_01723 | Locus_type     | CDS                                               |          |
| 2558671055 | DRAFT_01723 | Product_name   | hypothetical protein                              |          |
| 2558671055 | DRAFT_01723 | Scaffold       | DRAFT_contig_70_925_len_8329_read_count_151445.57 |          |
| 2558671055 | DRAFT_01723 | Coordinates    | 576..1340(+)                                      |          |
| 2558671055 | DRAFT_01723 | DNA_length     | 765bp                                             |          |
| 2558671055 | DRAFT_01723 | Protein_length | 254aa                                             |          |
| 2558671055 | DRAFT_01723 | GC             |                                                   | 0.52     |
| 2558671055 | DRAFT_01723 | Transmembrane  | Yes                                               |          |
| 2558671056 | DRAFT_01724 | TIGR02537      | archaeal flagellin N-terminal-like domain         | 2.30E-08 |
| 2558671056 | DRAFT_01724 | Locus_type     | CDS                                               |          |
| 2558671056 | DRAFT_01724 | Product_name   | archaeal flagellin N-terminal-like domain         |          |
| 2558671056 | DRAFT_01724 | Scaffold       | DRAFT_contig_70_925_len_8329_read_count_151445.57 |          |
| 2558671056 | DRAFT_01724 | Coordinates    | 1615..3375(+)                                     |          |
| 2558671056 | DRAFT_01724 | DNA_length     | 1761bp                                            |          |
| 2558671056 | DRAFT_01724 | Protein_length | 586aa                                             |          |
| 2558671056 | DRAFT_01724 | GC             |                                                   | 0.55     |
| 2558671056 | DRAFT_01724 | Transmembrane  | Yes                                               |          |

|            |             |                |                                                   |          |
|------------|-------------|----------------|---------------------------------------------------|----------|
| 2558671057 | DRAFT_01725 | Locus_type     | CDS                                               |          |
| 2558671057 | DRAFT_01725 | Product_name   | hypothetical protein                              |          |
| 2558671057 | DRAFT_01725 | Scaffold       | DRAFT_contig_70_925_len_8329_read_count_151445.57 |          |
| 2558671057 | DRAFT_01725 | Coordinates    | 3470..4066(+)                                     |          |
| 2558671057 | DRAFT_01725 | DNA_length     | 597bp                                             |          |
| 2558671057 | DRAFT_01725 | Protein_length | 198aa                                             |          |
| 2558671057 | DRAFT_01725 | GC             |                                                   | 0.54     |
| 2558671057 | DRAFT_01725 | Transmembrane  | Yes                                               |          |
|            |             |                |                                                   |          |
| 2558671058 | DRAFT_01726 | Locus_type     | CDS                                               |          |
| 2558671058 | DRAFT_01726 | Product_name   | hypothetical protein                              |          |
| 2558671058 | DRAFT_01726 | Scaffold       | DRAFT_contig_70_925_len_8329_read_count_151445.57 |          |
| 2558671058 | DRAFT_01726 | Coordinates    | 4076..5845(+)                                     |          |
| 2558671058 | DRAFT_01726 | DNA_length     | 1770bp                                            |          |
| 2558671058 | DRAFT_01726 | Protein_length | 589aa                                             |          |
| 2558671058 | DRAFT_01726 | GC             |                                                   | 0.54     |
| 2558671058 | DRAFT_01726 | Transmembrane  | Yes                                               |          |
|            |             |                |                                                   |          |
| 2558671059 | DRAFT_01727 | TIGR02537      | archaeal flagellin N-terminal-like domain         | 7.60E-08 |
| 2558671059 | DRAFT_01727 | Locus_type     | CDS                                               |          |
| 2558671059 | DRAFT_01727 | Product_name   | archaeal flagellin N-terminal-like domain         |          |
| 2558671059 | DRAFT_01727 | Scaffold       | DRAFT_contig_70_925_len_8329_read_count_151445.57 |          |
| 2558671059 | DRAFT_01727 | Coordinates    | 5857..8328(+)                                     |          |
| 2558671059 | DRAFT_01727 | DNA_length     | 2472bp                                            |          |
| 2558671059 | DRAFT_01727 | Protein_length | 824aa                                             |          |
| 2558671059 | DRAFT_01727 | GC             |                                                   | 0.56     |
| 2558671059 | DRAFT_01727 | Transmembrane  | Yes                                               |          |
|            |             |                |                                                   |          |
| 2558671060 | DRAFT_01728 | pfam12695      | Abhydrolase_5                                     | 9.60E-12 |
| 2558671060 | DRAFT_01728 | Locus_type     | CDS                                               |          |
| 2558671060 | DRAFT_01728 | Product_name   | Dienelactone hydrolase and related enzymes        |          |
| 2558671060 | DRAFT_01728 | Scaffold       | DRAFT_contig_70_970_len_8171_read_count_141304.58 |          |
| 2558671060 | DRAFT_01728 | Coordinates    | 1..450(+)                                         |          |
| 2558671060 | DRAFT_01728 | DNA_length     | 450bp                                             |          |

|            |             |                |                                                                  |          |
|------------|-------------|----------------|------------------------------------------------------------------|----------|
| 2558671060 | DRAFT_01728 | Protein_length | 149aa                                                            |          |
| 2558671060 | DRAFT_01728 | GC             |                                                                  | 0.62     |
| 2558671061 | DRAFT_01729 | Locus_type     | CDS                                                              |          |
| 2558671061 | DRAFT_01729 | Product_name   | hypothetical protein                                             |          |
| 2558671061 | DRAFT_01729 | Scaffold       | DRAFT_contig_70_970_len_8171_read_count_141304.58                |          |
| 2558671061 | DRAFT_01729 | Coordinates    | 526..1005(-)                                                     |          |
| 2558671061 | DRAFT_01729 | DNA_length     | 480bp                                                            |          |
| 2558671061 | DRAFT_01729 | Protein_length | 159aa                                                            |          |
| 2558671061 | DRAFT_01729 | GC             |                                                                  | 0.57     |
| 2558671062 | DRAFT_01730 | COG_category   | [O] Posttranslational modification, protein turnover, chaperones |          |
| 2558671062 | DRAFT_01730 | COG0695        | Glutaredoxin and related proteins                                | 1.00E-02 |
| 2558671062 | DRAFT_01730 | Locus_type     | CDS                                                              |          |
| 2558671062 | DRAFT_01730 | Product_name   | hypothetical protein                                             |          |
| 2558671062 | DRAFT_01730 | Scaffold       | DRAFT_contig_70_970_len_8171_read_count_141304.58                |          |
| 2558671062 | DRAFT_01730 | Coordinates    | 992..1339(-)                                                     |          |
| 2558671062 | DRAFT_01730 | DNA_length     | 348bp                                                            |          |
| 2558671062 | DRAFT_01730 | Protein_length | 115aa                                                            |          |
| 2558671062 | DRAFT_01730 | GC             |                                                                  | 0.55     |
| 2558671063 | DRAFT_01731 | COG_category   | [R] General function prediction only                             |          |
| 2558671063 | DRAFT_01731 | COG0456        | Acetyltransferases                                               | 2.00E-15 |
| 2558671063 | DRAFT_01731 | pfam00583      | Acetyltransf_1                                                   | 8.90E-15 |
| 2558671063 | DRAFT_01731 | EC:2.3.1.128   | Ribosomal-protein-alanine N-acetyltransferase.                   |          |
| 2558671063 | DRAFT_01731 | KO:K03789      | ribosomal-protein-alanine N-acetyltransferase [EC:2.3.1.128]     | 1.50E-13 |
| 2558671063 | DRAFT_01731 | Locus_type     | CDS                                                              |          |
| 2558671063 | DRAFT_01731 | Product_name   | Acetyltransferases                                               |          |
| 2558671063 | DRAFT_01731 | Scaffold       | DRAFT_contig_70_970_len_8171_read_count_141304.58                |          |
| 2558671063 | DRAFT_01731 | Coordinates    | 1549..2025(-)                                                    |          |
| 2558671063 | DRAFT_01731 | DNA_length     | 477bp                                                            |          |
| 2558671063 | DRAFT_01731 | Protein_length | 158aa                                                            |          |
| 2558671063 | DRAFT_01731 | GC             |                                                                  | 0.53     |

|            |             |                |                                                                           |          |
|------------|-------------|----------------|---------------------------------------------------------------------------|----------|
| 2558671064 | DRAFT_01732 | Locus_type     | CDS                                                                       |          |
| 2558671064 | DRAFT_01732 | Product_name   | hypothetical protein                                                      |          |
| 2558671064 | DRAFT_01732 | Scaffold       | DRAFT_contig_70_970_len_8171_read_count_141304.58                         |          |
| 2558671064 | DRAFT_01732 | Coordinates    | 2156..2506(+)                                                             |          |
| 2558671064 | DRAFT_01732 | DNA_length     | 351bp                                                                     |          |
| 2558671064 | DRAFT_01732 | Protein_length | 116aa                                                                     |          |
| 2558671064 | DRAFT_01732 | GC             |                                                                           | 0.62     |
| 2558671065 | DRAFT_01733 | COG_category   | [F] Nucleotide transport and metabolism                                   |          |
| 2558671065 | DRAFT_01733 | COG2169        | Adenosine deaminase                                                       | 2.00E-41 |
| 2558671065 | DRAFT_01733 | pfam01035      | DNA_binding_1                                                             | 5.10E-31 |
| 2558671065 | DRAFT_01733 | pfam02805      | Ada_Zn_binding                                                            | 4.40E-28 |
| 2558671065 | DRAFT_01733 | pfam12833      | HTH_18                                                                    | 3.10E-10 |
| 2558671065 | DRAFT_01733 | EC:2.1.1.63    | Methylated-DNA--[protein]-cysteine S-methyltransferase.                   |          |
| 2558671065 | DRAFT_01733 | TIGR00589      | O-6-methylguanine DNA methyltransferase                                   | 1.30E-37 |
| 2558671065 | DRAFT_01733 | KO:K10778      | AraC family transcriptional regulator, regulatory protein of adaptative r | 0.00E+00 |
| 2558671065 | DRAFT_01733 | Locus_type     | CDS                                                                       |          |
| 2558671065 | DRAFT_01733 | Product_name   | Adenosine deaminase                                                       |          |
| 2558671065 | DRAFT_01733 | Scaffold       | DRAFT_contig_70_970_len_8171_read_count_141304.58                         |          |
| 2558671065 | DRAFT_01733 | Coordinates    | 2558..3736(+)                                                             |          |
| 2558671065 | DRAFT_01733 | DNA_length     | 1179bp                                                                    |          |
| 2558671065 | DRAFT_01733 | Protein_length | 392aa                                                                     |          |
| 2558671065 | DRAFT_01733 | GC             |                                                                           | 0.59     |
| 2558671065 | DRAFT_01733 | Fused_gene     | Yes                                                                       |          |
| 2558671066 | DRAFT_01734 | Locus_type     | CDS                                                                       |          |
| 2558671066 | DRAFT_01734 | Product_name   | hypothetical protein                                                      |          |
| 2558671066 | DRAFT_01734 | Scaffold       | DRAFT_contig_70_970_len_8171_read_count_141304.58                         |          |
| 2558671066 | DRAFT_01734 | Coordinates    | 4018..4539(-)                                                             |          |
| 2558671066 | DRAFT_01734 | DNA_length     | 522bp                                                                     |          |
| 2558671066 | DRAFT_01734 | Protein_length | 173aa                                                                     |          |
| 2558671066 | DRAFT_01734 | GC             |                                                                           | 0.57     |
| 2558671067 | DRAFT_01735 | pfam01844      | HNH                                                                       | 3.00E-09 |

|            |             |                |                                                         |          |
|------------|-------------|----------------|---------------------------------------------------------|----------|
| 2558671067 | DRAFT_01735 | Locus_type     | CDS                                                     |          |
| 2558671067 | DRAFT_01735 | Product_name   | Restriction endonuclease                                |          |
| 2558671067 | DRAFT_01735 | Scaffold       | DRAFT_contig_70_970_len_8171_read_count_141304.58       |          |
| 2558671067 | DRAFT_01735 | Coordinates    | 4925..5464(+)                                           |          |
| 2558671067 | DRAFT_01735 | DNA_length     | 540bp                                                   |          |
| 2558671067 | DRAFT_01735 | Protein_length | 179aa                                                   |          |
| 2558671067 | DRAFT_01735 | GC             |                                                         | 0.56     |
|            |             |                |                                                         |          |
| 2558671068 | DRAFT_01736 | IMG_pathway    | 224: Nucleotide incision repair                         |          |
| 2558671068 | DRAFT_01736 | IMG_pathway    | 616: Abasic site processing by AP endonuclease activity |          |
| 2558671068 | DRAFT_01736 | COG_category   | [L] Replication, recombination and repair               |          |
| 2558671068 | DRAFT_01736 | COG1515        | Deoxyinosine 3'endonuclease (endonuclease V)            | 1.00E-25 |
| 2558671068 | DRAFT_01736 | pfam04493      | Endonuclease_5                                          | 1.60E-30 |
| 2558671068 | DRAFT_01736 | EC:3.1.21.7    | Deoxyribonuclease V.                                    |          |
| 2558671068 | DRAFT_01736 | KO:K05982      | deoxyribonuclease V [EC:3.1.21.7]                       | 1.10E-24 |
| 2558671068 | DRAFT_01736 | ITRM:00592     | Endonuclease V (EC 3.1.21.-)                            |          |
| 2558671068 | DRAFT_01736 | Locus_type     | CDS                                                     |          |
| 2558671068 | DRAFT_01736 | Product_name   | Endonuclease V (EC 3.1.21.-)                            |          |
| 2558671068 | DRAFT_01736 | Scaffold       | DRAFT_contig_70_970_len_8171_read_count_141304.58       |          |
| 2558671068 | DRAFT_01736 | Coordinates    | 5724..6368(+)                                           |          |
| 2558671068 | DRAFT_01736 | DNA_length     | 645bp                                                   |          |
| 2558671068 | DRAFT_01736 | Protein_length | 214aa                                                   |          |
| 2558671068 | DRAFT_01736 | GC             |                                                         | 0.56     |
|            |             |                |                                                         |          |
| 2558671069 | DRAFT_01737 | pfam05048      | NosD                                                    | 6.40E-10 |
| 2558671069 | DRAFT_01737 | pfam05048      | NosD                                                    | 4.60E-13 |
| 2558671069 | DRAFT_01737 | TIGR03804      | parallel beta-helix repeat (two copies)                 | 2.40E-09 |
| 2558671069 | DRAFT_01737 | Locus_type     | CDS                                                     |          |
| 2558671069 | DRAFT_01737 | Product_name   | parallel beta-helix repeat (two copies)                 |          |
| 2558671069 | DRAFT_01737 | Scaffold       | DRAFT_contig_70_970_len_8171_read_count_141304.58       |          |
| 2558671069 | DRAFT_01737 | Coordinates    | 6465..7793(+)                                           |          |
| 2558671069 | DRAFT_01737 | DNA_length     | 1329bp                                                  |          |
| 2558671069 | DRAFT_01737 | Protein_length | 442aa                                                   |          |
| 2558671069 | DRAFT_01737 | GC             |                                                         | 0.56     |

|            |             |                |                                                    |           |
|------------|-------------|----------------|----------------------------------------------------|-----------|
| 2558671069 | DRAFT_01737 | Transmembrane  | Yes                                                |           |
| 2558671070 | DRAFT_01738 | Locus_type     | CDS                                                |           |
| 2558671070 | DRAFT_01738 | Product_name   | hypothetical protein                               |           |
| 2558671070 | DRAFT_01738 | Scaffold       | DRAFT_contig_70_970_len_8171_read_count_141304.58  |           |
| 2558671070 | DRAFT_01738 | Coordinates    | 7983..8168(+)                                      |           |
| 2558671070 | DRAFT_01738 | DNA_length     | 186bp                                              |           |
| 2558671070 | DRAFT_01738 | Protein_length | 62aa                                               |           |
| 2558671070 | DRAFT_01738 | GC             |                                                    | 0.61      |
| 2558671071 | DRAFT_01739 | Locus_type     | CDS                                                |           |
| 2558671071 | DRAFT_01739 | Product_name   | hypothetical protein                               |           |
| 2558671071 | DRAFT_01739 | Scaffold       | DRAFT_contig_70_1011_len_7975_read_count_148262.59 |           |
| 2558671071 | DRAFT_01739 | Coordinates    | 1..231(+)                                          |           |
| 2558671071 | DRAFT_01739 | DNA_length     | 231bp                                              |           |
| 2558671071 | DRAFT_01739 | Protein_length | 76aa                                               |           |
| 2558671071 | DRAFT_01739 | GC             |                                                    | 0.55      |
| 2558671072 | DRAFT_01740 | KEGG_module    | M00358: Coenzyme M biosynthesis                    |           |
| 2558671072 | DRAFT_01740 | COG_category   | [C] Energy production and conversion               |           |
| 2558671072 | DRAFT_01740 | COG2055        | Malate/L-lactate dehydrogenases                    | 2.00E-95  |
| 2558671072 | DRAFT_01740 | pfam02615      | Ldh_2                                              | 7.00E-104 |
| 2558671072 | DRAFT_01740 | EC:1.1.1.272   | (R)-2-hydroxyacid dehydrogenase.                   |           |
| 2558671072 | DRAFT_01740 | KO:K05884      | (R)-2-hydroxyacid dehydrogenase [EC:1.1.1.272]     | 0.00E+00  |
| 2558671072 | DRAFT_01740 | Locus_type     | CDS                                                |           |
| 2558671072 | DRAFT_01740 | Product_name   | Malate/L-lactate dehydrogenases                    |           |
| 2558671072 | DRAFT_01740 | Scaffold       | DRAFT_contig_70_1011_len_7975_read_count_148262.59 |           |
| 2558671072 | DRAFT_01740 | Coordinates    | 299..1339(+)                                       |           |
| 2558671072 | DRAFT_01740 | DNA_length     | 1041bp                                             |           |
| 2558671072 | DRAFT_01740 | Protein_length | 346aa                                              |           |
| 2558671072 | DRAFT_01740 | GC             |                                                    | 0.54      |
| 2558671073 | DRAFT_01741 | Locus_type     | CDS                                                |           |
| 2558671073 | DRAFT_01741 | Product_name   | hypothetical protein                               |           |

|            |             |                |                                                                                           |
|------------|-------------|----------------|-------------------------------------------------------------------------------------------|
| 2558671073 | DRAFT_01741 | Scaffold       | DRAFT_contig_70_1011_len_7975_read_count_148262.59                                        |
| 2558671073 | DRAFT_01741 | Coordinates    | 1405..2790(-)                                                                             |
| 2558671073 | DRAFT_01741 | DNA_length     | 1386bp                                                                                    |
| 2558671073 | DRAFT_01741 | Protein_length | 461aa                                                                                     |
| 2558671073 | DRAFT_01741 | GC             | 0.52                                                                                      |
| 2558671074 | DRAFT_01742 | KEGG_module    | M00119: Pantothenate biosynthesis, valine/L-aspartate => pantothenate                     |
| 2558671074 | DRAFT_01742 | KEGG_module    | M00019: Valine/isoleucine biosynthesis, pyruvate => valine / 2-oxobutanoate => isoleucine |
| 2558671074 | DRAFT_01742 | KEGG_module    | M00570: Isoleucine biosynthesis, threonine => 2-oxobutanoate => isoleucine                |
| 2558671074 | DRAFT_01742 | KEGG_module    | M00036: Leucine degradation, leucine => acetoacetate + acetyl-CoA                         |
| 2558671074 | DRAFT_01742 | Metacyc        | ILEUSYN-PWY: isoleucine biosynthesis I (from threonine)                                   |
| 2558671074 | DRAFT_01742 | Metacyc        | PWY-5108: isoleucine biosynthesis V                                                       |
| 2558671074 | DRAFT_01742 | Metacyc        | PWY-5104: isoleucine biosynthesis IV                                                      |
| 2558671074 | DRAFT_01742 | Metacyc        | LEUSYN-PWY: leucine biosynthesis                                                          |
| 2558671074 | DRAFT_01742 | Metacyc        | ILEUDEG-PWY: isoleucine degradation I                                                     |
| 2558671074 | DRAFT_01742 | Metacyc        | PWY-5076: leucine degradation III                                                         |
| 2558671074 | DRAFT_01742 | Metacyc        | VALDEG-PWY: valine degradation I                                                          |
| 2558671074 | DRAFT_01742 | Metacyc        | PWY-5057: valine degradation II                                                           |
| 2558671074 | DRAFT_01742 | Metacyc        | ALANINE-VALINESYN-PWY: alanine biosynthesis I                                             |
| 2558671074 | DRAFT_01742 | Metacyc        | PWY-5103: isoleucine biosynthesis III                                                     |
| 2558671074 | DRAFT_01742 | Metacyc        | PWY-5101: isoleucine biosynthesis II                                                      |
| 2558671074 | DRAFT_01742 | Metacyc        | VALSYN-PWY: valine biosynthesis                                                           |
| 2558671074 | DRAFT_01742 | Metacyc        | PWY-5078: isoleucine degradation II                                                       |
| 2558671074 | DRAFT_01742 | Metacyc        | LEU-DEG2-PWY: leucine degradation I                                                       |
| 2558671074 | DRAFT_01742 | COG_category   | [H] Coenzyme transport and metabolism                                                     |
| 2558671074 | DRAFT_01742 | COG_category   | [E] Amino acid transport and metabolism                                                   |
| 2558671074 | DRAFT_01742 | COG0115        | Branched-chain amino acid aminotransferase/4-amino-4-deoxychorism 2.00E-65                |
| 2558671074 | DRAFT_01742 | pfam01063      | Aminotran_4 5.90E-44                                                                      |
| 2558671074 | DRAFT_01742 | EC:2.6.1.42    | Branched-chain-amino-acid transaminase.                                                   |
| 2558671074 | DRAFT_01742 | TIGR01122      | branched-chain amino acid aminotransferase, group I 5.10E-120                             |
| 2558671074 | DRAFT_01742 | KO:K00826      | branched-chain amino acid aminotransferase [EC:2.6.1.42] 0.00E+00                         |
| 2558671074 | DRAFT_01742 | Locus_type     | CDS                                                                                       |
| 2558671074 | DRAFT_01742 | Product_name   | branched-chain amino acid aminotransferase, group I                                       |
| 2558671074 | DRAFT_01742 | Scaffold       | DRAFT_contig_70_1011_len_7975_read_count_148262.59                                        |

|            |             |                |                                                            |          |
|------------|-------------|----------------|------------------------------------------------------------|----------|
| 2558671074 | DRAFT_01742 | Coordinates    | 2825..3769(-)                                              |          |
| 2558671074 | DRAFT_01742 | DNA_length     | 945bp                                                      |          |
| 2558671074 | DRAFT_01742 | Protein_length | 314aa                                                      |          |
| 2558671074 | DRAFT_01742 | GC             |                                                            | 0.55     |
| 2558671075 | DRAFT_01743 | COG_category   | [C] Energy production and conversion                       |          |
| 2558671075 | DRAFT_01743 | COG1042        | Acyl-CoA synthetase (NDP forming)                          | 0.00E+00 |
| 2558671075 | DRAFT_01743 | pfam13380      | CoA_binding_2                                              | 6.70E-21 |
| 2558671075 | DRAFT_01743 | pfam13607      | Succ_CoA_lig                                               | 1.20E-54 |
| 2558671075 | DRAFT_01743 | pfam13302      | Acetyltransf_3                                             | 1.90E-08 |
| 2558671075 | DRAFT_01743 | pfam13549      | ATP-grasp_5                                                | 4.40E-69 |
| 2558671075 | DRAFT_01743 | TIGR02717      | acetyl coenzyme A synthetase (ADP forming), alpha domain   | 0.00E+00 |
| 2558671075 | DRAFT_01743 | KO:K09181      | hypothetical protein                                       | 0.00E+00 |
| 2558671075 | DRAFT_01743 | Locus_type     | CDS                                                        |          |
| 2558671075 | DRAFT_01743 | Product_name   | Acyl-CoA synthetase (NDP forming)                          |          |
| 2558671075 | DRAFT_01743 | Scaffold       | DRAFT_contig_70_1011_len_7975_read_count_148262.59         |          |
| 2558671075 | DRAFT_01743 | Coordinates    | 3905..6706(-)                                              |          |
| 2558671075 | DRAFT_01743 | DNA_length     | 2802bp                                                     |          |
| 2558671075 | DRAFT_01743 | Protein_length | 933aa                                                      |          |
| 2558671075 | DRAFT_01743 | GC             |                                                            | 0.6      |
| 2558671075 | DRAFT_01743 | Fused_gene     | Yes                                                        |          |
| 2558671076 | DRAFT_01744 | Locus_type     | CDS                                                        |          |
| 2558671076 | DRAFT_01744 | Product_name   | hypothetical protein                                       |          |
| 2558671076 | DRAFT_01744 | Scaffold       | DRAFT_contig_70_1011_len_7975_read_count_148262.59         |          |
| 2558671076 | DRAFT_01744 | Coordinates    | 6892..7974(-)                                              |          |
| 2558671076 | DRAFT_01744 | DNA_length     | 1083bp                                                     |          |
| 2558671076 | DRAFT_01744 | Protein_length | 360aa                                                      |          |
| 2558671076 | DRAFT_01744 | GC             |                                                            | 0.56     |
| 2558671077 | DRAFT_01745 | COG_category   | [T] Signal transduction mechanisms                         |          |
| 2558671077 | DRAFT_01745 | COG0467        | RecA-superfamily ATPases implicated in signal transduction | 1.00E-09 |
| 2558671077 | DRAFT_01745 | pfam07088      | GvpD                                                       | 9.90E-29 |
| 2558671077 | DRAFT_01745 | Locus_type     | CDS                                                        |          |



|            |             |                |                                                    |          |
|------------|-------------|----------------|----------------------------------------------------|----------|
| 2558671077 | DRAFT_01745 | Product_name   | GvpD gas vesicle protein                           |          |
| 2558671077 | DRAFT_01745 | Scaffold       | DRAFT_contig_70_1019_len_7928_read_count_151901.60 |          |
| 2558671077 | DRAFT_01745 | Coordinates    | 3..962(-)                                          |          |
| 2558671077 | DRAFT_01745 | DNA_length     | 960bp                                              |          |
| 2558671077 | DRAFT_01745 | Protein_length | 320aa                                              |          |
| 2558671077 | DRAFT_01745 | GC             |                                                    | 0.5      |
|            |             |                |                                                    |          |
| 2558671078 | DRAFT_01746 | Locus_type     | CDS                                                |          |
| 2558671078 | DRAFT_01746 | Product_name   | hypothetical protein                               |          |
| 2558671078 | DRAFT_01746 | Scaffold       | DRAFT_contig_70_1019_len_7928_read_count_151901.60 |          |
| 2558671078 | DRAFT_01746 | Coordinates    | 959..1279(-)                                       |          |
| 2558671078 | DRAFT_01746 | DNA_length     | 321bp                                              |          |
| 2558671078 | DRAFT_01746 | Protein_length | 106aa                                              |          |
| 2558671078 | DRAFT_01746 | GC             |                                                    | 0.51     |
|            |             |                |                                                    |          |
| 2558671079 | DRAFT_01747 | Locus_type     | CDS                                                |          |
| 2558671079 | DRAFT_01747 | Product_name   | hypothetical protein                               |          |
| 2558671079 | DRAFT_01747 | Scaffold       | DRAFT_contig_70_1019_len_7928_read_count_151901.60 |          |
| 2558671079 | DRAFT_01747 | Coordinates    | 1682..1972(-)                                      |          |
| 2558671079 | DRAFT_01747 | DNA_length     | 291bp                                              |          |
| 2558671079 | DRAFT_01747 | Protein_length | 96aa                                               |          |
| 2558671079 | DRAFT_01747 | GC             |                                                    | 0.5      |
| 2558671079 | DRAFT_01747 | Transmembrane  | Yes                                                |          |
|            |             |                |                                                    |          |
| 2558671080 | DRAFT_01748 | Locus_type     | CDS                                                |          |
| 2558671080 | DRAFT_01748 | Product_name   | hypothetical protein                               |          |
| 2558671080 | DRAFT_01748 | Scaffold       | DRAFT_contig_70_1019_len_7928_read_count_151901.60 |          |
| 2558671080 | DRAFT_01748 | Coordinates    | 2208..2378(-)                                      |          |
| 2558671080 | DRAFT_01748 | DNA_length     | 171bp                                              |          |
| 2558671080 | DRAFT_01748 | Protein_length | 56aa                                               |          |
| 2558671080 | DRAFT_01748 | GC             |                                                    | 0.49     |
|            |             |                |                                                    |          |
| 2558671081 | DRAFT_01749 | pfam04138      | GtrA                                               | 5.40E-07 |
| 2558671081 | DRAFT_01749 | pfam03706      | UPF0104                                            | 2.00E-13 |

|            |             |                |                |                                                                  |          |
|------------|-------------|----------------|----------------|------------------------------------------------------------------|----------|
| 2558671081 | DRAFT_01749 | Locus_type     |                | CDS                                                              |          |
| 2558671081 | DRAFT_01749 | Product_name   |                | GtrA-like protein/Uncharacterised protein family (UPF0104)       |          |
| 2558671081 | DRAFT_01749 | Scaffold       |                | DRAFT_contig_70_1019_len_7928_read_count_151901.60               |          |
| 2558671081 | DRAFT_01749 | Coordinates    |                | 2801..4333(+)                                                    |          |
| 2558671081 | DRAFT_01749 | DNA_length     |                | 1533bp                                                           |          |
| 2558671081 | DRAFT_01749 | Protein_length |                | 510aa                                                            |          |
| 2558671081 | DRAFT_01749 | GC             |                |                                                                  | 0.56     |
| 2558671081 | DRAFT_01749 | Transmembrane  |                | Yes                                                              |          |
|            |             |                |                |                                                                  |          |
| 2558671082 | DRAFT_01750 | Locus_type     |                | CDS                                                              |          |
| 2558671082 | DRAFT_01750 | Product_name   |                | hypothetical protein                                             |          |
| 2558671082 | DRAFT_01750 | Scaffold       |                | DRAFT_contig_70_1019_len_7928_read_count_151901.60               |          |
| 2558671082 | DRAFT_01750 | Coordinates    |                | 4657..4818(+)                                                    |          |
| 2558671082 | DRAFT_01750 | DNA_length     |                | 162bp                                                            |          |
| 2558671082 | DRAFT_01750 | Protein_length |                | 53aa                                                             |          |
| 2558671082 | DRAFT_01750 | GC             |                |                                                                  | 0.57     |
|            |             |                |                |                                                                  |          |
| 2558671083 | DRAFT_01751 | pfam00583      | Acetyltransf_1 |                                                                  | 4.50E-11 |
| 2558671083 | DRAFT_01751 | Locus_type     |                | CDS                                                              |          |
| 2558671083 | DRAFT_01751 | Product_name   |                | Acetyltransferases, including N-acetylases of ribosomal proteins |          |
| 2558671083 | DRAFT_01751 | Scaffold       |                | DRAFT_contig_70_1019_len_7928_read_count_151901.60               |          |
| 2558671083 | DRAFT_01751 | Coordinates    |                | 5321..5863(+)                                                    |          |
| 2558671083 | DRAFT_01751 | DNA_length     |                | 543bp                                                            |          |
| 2558671083 | DRAFT_01751 | Protein_length |                | 180aa                                                            |          |
| 2558671083 | DRAFT_01751 | GC             |                |                                                                  | 0.51     |
|            |             |                |                |                                                                  |          |
| 2558671084 | DRAFT_01752 | Locus_type     |                | CDS                                                              |          |
| 2558671084 | DRAFT_01752 | Product_name   |                | hypothetical protein                                             |          |
| 2558671084 | DRAFT_01752 | Scaffold       |                | DRAFT_contig_70_1019_len_7928_read_count_151901.60               |          |
| 2558671084 | DRAFT_01752 | Coordinates    |                | 6137..6313(+)                                                    |          |
| 2558671084 | DRAFT_01752 | DNA_length     |                | 177bp                                                            |          |
| 2558671084 | DRAFT_01752 | Protein_length |                | 58aa                                                             |          |
| 2558671084 | DRAFT_01752 | GC             |                |                                                                  | 0.5      |

|            |             |                |                                                    |      |
|------------|-------------|----------------|----------------------------------------------------|------|
| 2558671085 | DRAFT_01753 | Locus_type     | CDS                                                |      |
| 2558671085 | DRAFT_01753 | Product_name   | hypothetical protein                               |      |
| 2558671085 | DRAFT_01753 | Scaffold       | DRAFT_contig_70_1019_len_7928_read_count_151901.60 |      |
| 2558671085 | DRAFT_01753 | Coordinates    | 6540..6995(-)                                      |      |
| 2558671085 | DRAFT_01753 | DNA_length     | 456bp                                              |      |
| 2558671085 | DRAFT_01753 | Protein_length | 151aa                                              |      |
| 2558671085 | DRAFT_01753 | GC             |                                                    | 0.47 |
|            |             |                |                                                    |      |
| 2558671086 | DRAFT_01754 | Locus_type     | CDS                                                |      |
| 2558671086 | DRAFT_01754 | Product_name   | hypothetical protein                               |      |
| 2558671086 | DRAFT_01754 | Scaffold       | DRAFT_contig_70_1019_len_7928_read_count_151901.60 |      |
| 2558671086 | DRAFT_01754 | Coordinates    | 7053..7214(-)                                      |      |
| 2558671086 | DRAFT_01754 | DNA_length     | 162bp                                              |      |
| 2558671086 | DRAFT_01754 | Protein_length | 53aa                                               |      |
| 2558671086 | DRAFT_01754 | GC             |                                                    | 0.51 |
| 2558671086 | DRAFT_01754 | Transmembrane  | Yes                                                |      |
|            |             |                |                                                    |      |
| 2558671087 | DRAFT_01755 | Locus_type     | CDS                                                |      |
| 2558671087 | DRAFT_01755 | Product_name   | hypothetical protein                               |      |
| 2558671087 | DRAFT_01755 | Scaffold       | DRAFT_contig_70_1019_len_7928_read_count_151901.60 |      |
| 2558671087 | DRAFT_01755 | Coordinates    | 7331..7762(+)                                      |      |
| 2558671087 | DRAFT_01755 | DNA_length     | 432bp                                              |      |
| 2558671087 | DRAFT_01755 | Protein_length | 143aa                                              |      |
| 2558671087 | DRAFT_01755 | GC             |                                                    | 0.55 |
| 2558671087 | DRAFT_01755 | Transmembrane  | Yes                                                |      |
|            |             |                |                                                    |      |
| 2558671088 | DRAFT_01756 | Locus_type     | CDS                                                |      |
| 2558671088 | DRAFT_01756 | Product_name   | hypothetical protein                               |      |
| 2558671088 | DRAFT_01756 | Scaffold       | DRAFT_contig_70_1067_len_7725_read_count_134975.61 |      |
| 2558671088 | DRAFT_01756 | Coordinates    | 1..303(+)                                          |      |
| 2558671088 | DRAFT_01756 | DNA_length     | 303bp                                              |      |
| 2558671088 | DRAFT_01756 | Protein_length | 100aa                                              |      |
| 2558671088 | DRAFT_01756 | GC             |                                                    | 0.54 |
| 2558671088 | DRAFT_01756 | Transmembrane  | Yes                                                |      |

|            |             |                |                                                                          |          |
|------------|-------------|----------------|--------------------------------------------------------------------------|----------|
| 2558671089 | DRAFT_01757 | KEGG_module    | M00222: Phosphate transport system                                       |          |
| 2558671089 | DRAFT_01757 | COG_category   | [P] Inorganic ion transport and metabolism                               |          |
| 2558671089 | DRAFT_01757 | COG0573        | ABC-type phosphate transport system, permease component                  | 4.00E-63 |
| 2558671089 | DRAFT_01757 | pfam00528      | BPD_transp_1                                                             | 1.00E-15 |
| 2558671089 | DRAFT_01757 | TIGR02138      | phosphate ABC transporter, permease protein PstC                         | 2.50E-95 |
| 2558671089 | DRAFT_01757 | KO:K02037      | phosphate transport system permease protein                              | 0.00E+00 |
| 2558671089 | DRAFT_01757 | ITERM:05784    | phosphate ABC transporter membrane protein 1, PhoT family (TC 3.A.1.7.1) |          |
| 2558671089 | DRAFT_01757 | Locus_type     | CDS                                                                      |          |
| 2558671089 | DRAFT_01757 | Product_name   | phosphate ABC transporter membrane protein 1, PhoT family (TC 3.A        |          |
| 2558671089 | DRAFT_01757 | Scaffold       | DRAFT_contig_70_1067_len_7725_read_count_134975.61                       |          |
| 2558671089 | DRAFT_01757 | Coordinates    | 350..1294(+)                                                             |          |
| 2558671089 | DRAFT_01757 | DNA_length     | 945bp                                                                    |          |
| 2558671089 | DRAFT_01757 | Protein_length | 314aa                                                                    |          |
| 2558671089 | DRAFT_01757 | GC             |                                                                          | 0.56     |
| 2558671089 | DRAFT_01757 | Transmembrane  | Yes                                                                      |          |
| 2558671090 | DRAFT_01758 | KEGG_module    | M00222: Phosphate transport system                                       |          |
| 2558671090 | DRAFT_01758 | COG_category   | [P] Inorganic ion transport and metabolism                               |          |
| 2558671090 | DRAFT_01758 | COG0581        | ABC-type phosphate transport system, permease component                  | 3.00E-48 |
| 2558671090 | DRAFT_01758 | pfam00528      | BPD_transp_1                                                             | 9.20E-16 |
| 2558671090 | DRAFT_01758 | TIGR00974      | phosphate ABC transporter, permease protein PstA                         | 1.20E-73 |
| 2558671090 | DRAFT_01758 | KO:K02038      | phosphate transport system permease protein                              | 0.00E+00 |
| 2558671090 | DRAFT_01758 | ITERM:06114    | phosphate ABC transporter membrane protein 2, PhoT family (TC 3.A.1.7.1) |          |
| 2558671090 | DRAFT_01758 | Locus_type     | CDS                                                                      |          |
| 2558671090 | DRAFT_01758 | Product_name   | phosphate ABC transporter membrane protein 2, PhoT family (TC 3.A        |          |
| 2558671090 | DRAFT_01758 | Scaffold       | DRAFT_contig_70_1067_len_7725_read_count_134975.61                       |          |
| 2558671090 | DRAFT_01758 | Coordinates    | 1312..2127(+)                                                            |          |
| 2558671090 | DRAFT_01758 | DNA_length     | 816bp                                                                    |          |
| 2558671090 | DRAFT_01758 | Protein_length | 271aa                                                                    |          |
| 2558671090 | DRAFT_01758 | GC             |                                                                          | 0.58     |
| 2558671090 | DRAFT_01758 | Transmembrane  | Yes                                                                      |          |
| 2558671091 | DRAFT_01759 | KEGG_module    | M00222: Phosphate transport system                                       |          |

|            |             |                |                                                                           |           |
|------------|-------------|----------------|---------------------------------------------------------------------------|-----------|
| 2558671091 | DRAFT_01759 | COG_category   | [P] Inorganic ion transport and metabolism                                |           |
| 2558671091 | DRAFT_01759 | COG1117        | ABC-type phosphate transport system, ATPase component                     | 3.00E-118 |
| 2558671091 | DRAFT_01759 | pfam00005      | ABC_tran                                                                  | 3.50E-31  |
| 2558671091 | DRAFT_01759 | EC:3.6.3.27    | Phosphate-transporting ATPase.                                            |           |
| 2558671091 | DRAFT_01759 | TIGR00972      | phosphate ABC transporter, ATP-binding protein                            | 1.70E-121 |
| 2558671091 | DRAFT_01759 | KO:K02036      | phosphate transport system ATP-binding protein [EC:3.6.3.27]              | 0.00E+00  |
| 2558671091 | DRAFT_01759 | ITERM:05785    | phosphate ABC transporter ATP-binding protein, PhoT family (TC 3.A.1.7.1) |           |
| 2558671091 | DRAFT_01759 | Locus_type     | CDS                                                                       |           |
| 2558671091 | DRAFT_01759 | Product_name   | phosphate ABC transporter ATP-binding protein, PhoT family (TC 3.A.1.7.1) |           |
| 2558671091 | DRAFT_01759 | Scaffold       | DRAFT_contig_70_1067_len_7725_read_count_134975.61                        |           |
| 2558671091 | DRAFT_01759 | Coordinates    | 2120..2947(+)                                                             |           |
| 2558671091 | DRAFT_01759 | DNA_length     | 828bp                                                                     |           |
| 2558671091 | DRAFT_01759 | Protein_length | 275aa                                                                     |           |
| 2558671091 | DRAFT_01759 | GC             |                                                                           | 0.57      |
| 2558671092 | DRAFT_01760 | COG_category   | [P] Inorganic ion transport and metabolism                                |           |
| 2558671092 | DRAFT_01760 | COG0704        | Phosphate uptake regulator                                                | 2.00E-23  |
| 2558671092 | DRAFT_01760 | pfam01895      | PhoU                                                                      | 2.00E-06  |
| 2558671092 | DRAFT_01760 | pfam01895      | PhoU                                                                      | 1.10E-15  |
| 2558671092 | DRAFT_01760 | KO:K02039      | phosphate transport system protein                                        | 0.00E+00  |
| 2558671092 | DRAFT_01760 | Locus_type     | CDS                                                                       |           |
| 2558671092 | DRAFT_01760 | Product_name   | Phosphate uptake regulator                                                |           |
| 2558671092 | DRAFT_01760 | Scaffold       | DRAFT_contig_70_1067_len_7725_read_count_134975.61                        |           |
| 2558671092 | DRAFT_01760 | Coordinates    | 2970..3584(+)                                                             |           |
| 2558671092 | DRAFT_01760 | DNA_length     | 615bp                                                                     |           |
| 2558671092 | DRAFT_01760 | Protein_length | 204aa                                                                     |           |
| 2558671092 | DRAFT_01760 | GC             |                                                                           | 0.6       |
| 2558671093 | DRAFT_01761 | pfam01513      | NAD_kinase                                                                | 1.00E-10  |
| 2558671093 | DRAFT_01761 | Locus_type     | CDS                                                                       |           |
| 2558671093 | DRAFT_01761 | Product_name   | Predicted sugar kinase                                                    |           |
| 2558671093 | DRAFT_01761 | Scaffold       | DRAFT_contig_70_1067_len_7725_read_count_134975.61                        |           |
| 2558671093 | DRAFT_01761 | Coordinates    | 3585..4409(-)                                                             |           |
| 2558671093 | DRAFT_01761 | DNA_length     | 825bp                                                                     |           |

|            |             |                |                                                    |          |
|------------|-------------|----------------|----------------------------------------------------|----------|
| 2558671093 | DRAFT_01761 | Protein_length | 274aa                                              |          |
| 2558671093 | DRAFT_01761 | GC             |                                                    | 0.59     |
| 2558671094 | DRAFT_01762 | COG_category   | [S] Function unknown                               |          |
| 2558671094 | DRAFT_01762 | COG1801        | Uncharacterized conserved protein                  | 2.00E-54 |
| 2558671094 | DRAFT_01762 | pfam01904      | DUF72                                              | 1.10E-62 |
| 2558671094 | DRAFT_01762 | Locus_type     | CDS                                                |          |
| 2558671094 | DRAFT_01762 | Product_name   | Uncharacterized conserved protein                  |          |
| 2558671094 | DRAFT_01762 | Scaffold       | DRAFT_contig_70_1067_len_7725_read_count_134975.61 |          |
| 2558671094 | DRAFT_01762 | Coordinates    | 4387..5244(-)                                      |          |
| 2558671094 | DRAFT_01762 | DNA_length     | 858bp                                              |          |
| 2558671094 | DRAFT_01762 | Protein_length | 285aa                                              |          |
| 2558671094 | DRAFT_01762 | GC             |                                                    | 0.57     |
| 2558671095 | DRAFT_01763 | COG_category   | [S] Function unknown                               |          |
| 2558671095 | DRAFT_01763 | COG1469        | Uncharacterized conserved protein                  | 2.00E-17 |
| 2558671095 | DRAFT_01763 | pfam02649      | GCHY-1                                             | 3.70E-20 |
| 2558671095 | DRAFT_01763 | Locus_type     | CDS                                                |          |
| 2558671095 | DRAFT_01763 | Product_name   | Uncharacterized conserved protein                  |          |
| 2558671095 | DRAFT_01763 | Scaffold       | DRAFT_contig_70_1067_len_7725_read_count_134975.61 |          |
| 2558671095 | DRAFT_01763 | Coordinates    | 5298..6047(-)                                      |          |
| 2558671095 | DRAFT_01763 | DNA_length     | 750bp                                              |          |
| 2558671095 | DRAFT_01763 | Protein_length | 249aa                                              |          |
| 2558671095 | DRAFT_01763 | GC             |                                                    | 0.59     |
| 2558671096 | DRAFT_01764 | COG_category   | [R] General function prediction only               |          |
| 2558671096 | DRAFT_01764 | COG0603        | Predicted PP-loop superfamily ATPase               | 4.00E-32 |
| 2558671096 | DRAFT_01764 | pfam06508      | QueC                                               | 2.60E-34 |
| 2558671096 | DRAFT_01764 | TIGR00364      | queuosine biosynthesis protein QueC                | 2.50E-31 |
| 2558671096 | DRAFT_01764 | KO:K06920      | queuosine biosynthesis protein QueC                | 9.50E-34 |
| 2558671096 | DRAFT_01764 | Locus_type     | CDS                                                |          |
| 2558671096 | DRAFT_01764 | Product_name   | Predicted PP-loop superfamily ATPase               |          |
| 2558671096 | DRAFT_01764 | Scaffold       | DRAFT_contig_70_1067_len_7725_read_count_134975.61 |          |
| 2558671096 | DRAFT_01764 | Coordinates    | 6074..6667(-)                                      |          |

|            |             |                |                                                    |          |
|------------|-------------|----------------|----------------------------------------------------|----------|
| 2558671096 | DRAFT_01764 | DNA_length     | 594bp                                              |          |
| 2558671096 | DRAFT_01764 | Protein_length | 197aa                                              |          |
| 2558671096 | DRAFT_01764 | GC             |                                                    | 0.56     |
| 2558671097 | DRAFT_01765 | COG_category   | [H] Coenzyme transport and metabolism              |          |
| 2558671097 | DRAFT_01765 | COG0720        | 6-pyruvoyl-tetrahydropterin synthase               | 2.00E-11 |
| 2558671097 | DRAFT_01765 | pfam01242      | PTPS                                               | 2.40E-19 |
| 2558671097 | DRAFT_01765 | Locus_type     | CDS                                                |          |
| 2558671097 | DRAFT_01765 | Product_name   | 6-pyruvoyl-tetrahydropterin synthase               |          |
| 2558671097 | DRAFT_01765 | Scaffold       | DRAFT_contig_70_1067_len_7725_read_count_134975.61 |          |
| 2558671097 | DRAFT_01765 | Coordinates    | 6712..7557(-)                                      |          |
| 2558671097 | DRAFT_01765 | DNA_length     | 846bp                                              |          |
| 2558671097 | DRAFT_01765 | Protein_length | 281aa                                              |          |
| 2558671097 | DRAFT_01765 | GC             |                                                    | 0.56     |
| 2558671098 | DRAFT_01766 | Locus_type     | tRNA                                               |          |
| 2558671098 | DRAFT_01766 | Product_name   | tRNA_Gly_CCC                                       |          |
| 2558671098 | DRAFT_01766 | Scaffold       | DRAFT_contig_70_1067_len_7725_read_count_134975.61 |          |
| 2558671098 | DRAFT_01766 | Coordinates    | 7632..7724(+)                                      |          |
| 2558671098 | DRAFT_01766 | DNA_length     | 79bp                                               |          |
| 2558671098 | DRAFT_01766 | GC             |                                                    | 0.68     |
| 2558671099 | DRAFT_01767 | Locus_type     | CDS                                                |          |
| 2558671099 | DRAFT_01767 | Product_name   | hypothetical protein                               |          |
| 2558671099 | DRAFT_01767 | Scaffold       | DRAFT_contig_70_1087_len_7658_read_count_135041.62 |          |
| 2558671099 | DRAFT_01767 | Coordinates    | 3..677(+)                                          |          |
| 2558671099 | DRAFT_01767 | DNA_length     | 675bp                                              |          |
| 2558671099 | DRAFT_01767 | Protein_length | 224aa                                              |          |
| 2558671099 | DRAFT_01767 | GC             |                                                    | 0.55     |
| 2558671100 | DRAFT_01768 | pfam13248      | zf-ribbon_3                                        | 1.20E-07 |
| 2558671100 | DRAFT_01768 | Locus_type     | CDS                                                |          |
| 2558671100 | DRAFT_01768 | Product_name   | zinc-ribbon domain                                 |          |
| 2558671100 | DRAFT_01768 | Scaffold       | DRAFT_contig_70_1087_len_7658_read_count_135041.62 |          |

|            |             |                |                                                                        |          |
|------------|-------------|----------------|------------------------------------------------------------------------|----------|
| 2558671100 | DRAFT_01768 | Coordinates    | 1002..1700(+)                                                          |          |
| 2558671100 | DRAFT_01768 | DNA_length     | 699bp                                                                  |          |
| 2558671100 | DRAFT_01768 | Protein_length | 232aa                                                                  |          |
| 2558671100 | DRAFT_01768 | GC             |                                                                        | 0.53     |
| 2558671101 | DRAFT_01769 | Locus_type     | CDS                                                                    |          |
| 2558671101 | DRAFT_01769 | Product_name   | hypothetical protein                                                   |          |
| 2558671101 | DRAFT_01769 | Scaffold       | DRAFT_contig_70_1087_len_7658_read_count_135041.62                     |          |
| 2558671101 | DRAFT_01769 | Coordinates    | 1869..2708(+)                                                          |          |
| 2558671101 | DRAFT_01769 | DNA_length     | 840bp                                                                  |          |
| 2558671101 | DRAFT_01769 | Protein_length | 279aa                                                                  |          |
| 2558671101 | DRAFT_01769 | GC             |                                                                        | 0.53     |
| 2558671102 | DRAFT_01770 | Locus_type     | CDS                                                                    |          |
| 2558671102 | DRAFT_01770 | Product_name   | hypothetical protein                                                   |          |
| 2558671102 | DRAFT_01770 | Scaffold       | DRAFT_contig_70_1087_len_7658_read_count_135041.62                     |          |
| 2558671102 | DRAFT_01770 | Coordinates    | 2828..2974(+)                                                          |          |
| 2558671102 | DRAFT_01770 | DNA_length     | 147bp                                                                  |          |
| 2558671102 | DRAFT_01770 | Protein_length | 48aa                                                                   |          |
| 2558671102 | DRAFT_01770 | GC             |                                                                        | 0.58     |
| 2558671102 | DRAFT_01770 | Transmembrane  | Yes                                                                    |          |
| 2558671103 | DRAFT_01771 | Locus_type     | CDS                                                                    |          |
| 2558671103 | DRAFT_01771 | Product_name   | hypothetical protein                                                   |          |
| 2558671103 | DRAFT_01771 | Scaffold       | DRAFT_contig_70_1087_len_7658_read_count_135041.62                     |          |
| 2558671103 | DRAFT_01771 | Coordinates    | 3203..3457(+)                                                          |          |
| 2558671103 | DRAFT_01771 | DNA_length     | 255bp                                                                  |          |
| 2558671103 | DRAFT_01771 | Protein_length | 84aa                                                                   |          |
| 2558671103 | DRAFT_01771 | GC             |                                                                        | 0.5      |
| 2558671104 | DRAFT_01772 | COG_category   | [R] General function prediction only                                   |          |
| 2558671104 | DRAFT_01772 | COG0596        | Predicted hydrolases or acyltransferases (alpha/beta hydrolase superfa | 4.00E-27 |
| 2558671104 | DRAFT_01772 | pfam12697      | Abhydrolase_6                                                          | 6.10E-37 |
| 2558671104 | DRAFT_01772 | Locus_type     | CDS                                                                    |          |



|            |             |                |               |                                                                       |          |
|------------|-------------|----------------|---------------|-----------------------------------------------------------------------|----------|
| 2558671104 | DRAFT_01772 | Product_name   |               | Predicted hydrolases or acyltransferases (alpha/beta hydrolase superi |          |
| 2558671104 | DRAFT_01772 | Scaffold       |               | DRAFT_contig_70_1087_len_7658_read_count_135041.62                    |          |
| 2558671104 | DRAFT_01772 | Coordinates    |               | 3590..4384(+)                                                         |          |
| 2558671104 | DRAFT_01772 | DNA_length     |               | 795bp                                                                 |          |
| 2558671104 | DRAFT_01772 | Protein_length |               | 264aa                                                                 |          |
| 2558671104 | DRAFT_01772 | GC             |               |                                                                       | 0.5      |
| 2558671105 | DRAFT_01773 | Locus_type     |               | CDS                                                                   |          |
| 2558671105 | DRAFT_01773 | Product_name   |               | hypothetical protein                                                  |          |
| 2558671105 | DRAFT_01773 | Scaffold       |               | DRAFT_contig_70_1087_len_7658_read_count_135041.62                    |          |
| 2558671105 | DRAFT_01773 | Coordinates    |               | 4734..4895(-)                                                         |          |
| 2558671105 | DRAFT_01773 | DNA_length     |               | 162bp                                                                 |          |
| 2558671105 | DRAFT_01773 | Protein_length |               | 53aa                                                                  |          |
| 2558671105 | DRAFT_01773 | GC             |               |                                                                       | 0.49     |
| 2558671105 | DRAFT_01773 | Transmembrane  |               | Yes                                                                   |          |
| 2558671106 | DRAFT_01774 | Locus_type     |               | CDS                                                                   |          |
| 2558671106 | DRAFT_01774 | Product_name   |               | hypothetical protein                                                  |          |
| 2558671106 | DRAFT_01774 | Scaffold       |               | DRAFT_contig_70_1087_len_7658_read_count_135041.62                    |          |
| 2558671106 | DRAFT_01774 | Coordinates    |               | 5069..5215(+)                                                         |          |
| 2558671106 | DRAFT_01774 | DNA_length     |               | 147bp                                                                 |          |
| 2558671106 | DRAFT_01774 | Protein_length |               | 48aa                                                                  |          |
| 2558671106 | DRAFT_01774 | GC             |               |                                                                       | 0.51     |
| 2558671107 | DRAFT_01775 | pfam13240      | zinc_ribbon_2 |                                                                       | 1.30E-07 |
| 2558671107 | DRAFT_01775 | Locus_type     |               | CDS                                                                   |          |
| 2558671107 | DRAFT_01775 | Product_name   |               | zinc-ribbon domain                                                    |          |
| 2558671107 | DRAFT_01775 | Scaffold       |               | DRAFT_contig_70_1087_len_7658_read_count_135041.62                    |          |
| 2558671107 | DRAFT_01775 | Coordinates    |               | 6251..7138(-)                                                         |          |
| 2558671107 | DRAFT_01775 | DNA_length     |               | 888bp                                                                 |          |
| 2558671107 | DRAFT_01775 | Protein_length |               | 295aa                                                                 |          |
| 2558671107 | DRAFT_01775 | GC             |               |                                                                       | 0.59     |
| 2558671107 | DRAFT_01775 | Transmembrane  |               | Yes                                                                   |          |

|            |             |                |                                                    |          |
|------------|-------------|----------------|----------------------------------------------------|----------|
| 2558671108 | DRAFT_01776 | Locus_type     | CDS                                                |          |
| 2558671108 | DRAFT_01776 | Product_name   | hypothetical protein                               |          |
| 2558671108 | DRAFT_01776 | Scaffold       | DRAFT_contig_70_1087_len_7658_read_count_135041.62 |          |
| 2558671108 | DRAFT_01776 | Coordinates    | 7368..7655(+)                                      |          |
| 2558671108 | DRAFT_01776 | DNA_length     | 288bp                                              |          |
| 2558671108 | DRAFT_01776 | Protein_length | 96aa                                               |          |
| 2558671108 | DRAFT_01776 | GC             |                                                    | 0.51     |
| 2558671108 | DRAFT_01776 | Transmembrane  | Yes                                                |          |
| 2558671109 | DRAFT_01777 | COG_category   | [R] General function prediction only               |          |
| 2558671109 | DRAFT_01777 | COG0456        | Acetyltransferases                                 | 6.00E-04 |
| 2558671109 | DRAFT_01777 | pfam13673      | Acetyltransf_10                                    | 1.90E-08 |
| 2558671109 | DRAFT_01777 | Locus_type     | CDS                                                |          |
| 2558671109 | DRAFT_01777 | Product_name   | Acetyltransferases                                 |          |
| 2558671109 | DRAFT_01777 | Scaffold       | DRAFT_contig_70_1231_len_7151_read_count_125048.63 |          |
| 2558671109 | DRAFT_01777 | Coordinates    | 1..972(+)                                          |          |
| 2558671109 | DRAFT_01777 | DNA_length     | 972bp                                              |          |
| 2558671109 | DRAFT_01777 | Protein_length | 323aa                                              |          |
| 2558671109 | DRAFT_01777 | GC             |                                                    | 0.51     |
| 2558671110 | DRAFT_01778 | COG_category   | [S] Function unknown                               |          |
| 2558671110 | DRAFT_01778 | COG5616        | Predicted integral membrane protein                | 2.00E-34 |
| 2558671110 | DRAFT_01778 | pfam13414      | TPR_11                                             | 3.70E-10 |
| 2558671110 | DRAFT_01778 | pfam00211      | Guanylate_cyc                                      | 1.00E-22 |
| 2558671110 | DRAFT_01778 | pfam13414      | TPR_11                                             | 3.30E-09 |
| 2558671110 | DRAFT_01778 | pfam13414      | TPR_11                                             | 1.60E-06 |
| 2558671110 | DRAFT_01778 | EC:4.6.1.1     | Adenylate cyclase.                                 |          |
| 2558671110 | DRAFT_01778 | KO:K01768      | adenylate cyclase [EC:4.6.1.1]                     | 0.00E+00 |
| 2558671110 | DRAFT_01778 | Locus_type     | CDS                                                |          |
| 2558671110 | DRAFT_01778 | Product_name   | Predicted integral membrane protein                |          |
| 2558671110 | DRAFT_01778 | Scaffold       | DRAFT_contig_70_1231_len_7151_read_count_125048.63 |          |
| 2558671110 | DRAFT_01778 | Coordinates    | 1282..3240(+)                                      |          |
| 2558671110 | DRAFT_01778 | DNA_length     | 1959bp                                             |          |
| 2558671110 | DRAFT_01778 | Protein_length | 652aa                                              |          |

|            |             |                |                                                                                |          |
|------------|-------------|----------------|--------------------------------------------------------------------------------|----------|
| 2558671110 | DRAFT_01778 | GC             |                                                                                | 0.57     |
| 2558671111 | DRAFT_01779 | COG_category   | [R] General function prediction only                                           |          |
| 2558671111 | DRAFT_01779 | COG2910        | Putative NADH-flavin reductase                                                 | 5.00E-18 |
| 2558671111 | DRAFT_01779 | pfam13460      | NAD_binding_10                                                                 | 2.00E-33 |
| 2558671111 | DRAFT_01779 | Locus_type     | CDS                                                                            |          |
| 2558671111 | DRAFT_01779 | Product_name   | Putative NADH-flavin reductase                                                 |          |
| 2558671111 | DRAFT_01779 | Scaffold       | DRAFT_contig_70_1231_len_7151_read_count_125048.63                             |          |
| 2558671111 | DRAFT_01779 | Coordinates    | 3362..4060(+)                                                                  |          |
| 2558671111 | DRAFT_01779 | DNA_length     | 699bp                                                                          |          |
| 2558671111 | DRAFT_01779 | Protein_length | 232aa                                                                          |          |
| 2558671111 | DRAFT_01779 | GC             |                                                                                | 0.63     |
| 2558671112 | DRAFT_01780 | Metacyc        | PWY-6147: 6-hydroxymethyl-dihydropterin diphosphate biosynthesis I             |          |
| 2558671112 | DRAFT_01780 | Metacyc        | PWY-6797: 6-hydroxymethyl-dihydropterin diphosphate biosynthesis II (archaea)  |          |
| 2558671112 | DRAFT_01780 | Metacyc        | PWY-7206: pyrimidine deoxyribonucleotides dephosphorylation                    |          |
| 2558671112 | DRAFT_01780 | Metacyc        | PWY-6575: juvenile hormone III biosynthesis I                                  |          |
| 2558671112 | DRAFT_01780 | Metacyc        | PWY-6502: oxidized GTP and dGTP detoxification                                 |          |
| 2558671112 | DRAFT_01780 | Metacyc        | PWY-6383: mono-<i>trans</i>, poly-<i>cis</i> decaprenyl phosphate biosynthesis |          |
| 2558671112 | DRAFT_01780 | COG_category   | [F] Nucleotide transport and metabolism                                        |          |
| 2558671112 | DRAFT_01780 | COG1051        | ADP-ribose pyrophosphatase                                                     | 6.00E-20 |
| 2558671112 | DRAFT_01780 | pfam00293      | NUDIX                                                                          | 7.40E-20 |
| 2558671112 | DRAFT_01780 | EC:3.6.1.-     | Hydrolases. Acting on acid anhydrides. In phosphorous-containing anhydrides.   |          |
| 2558671112 | DRAFT_01780 | KO:K03574      | 7,8-dihydro-8-oxoguanine triphosphatase [EC:3.6.1.-]                           | 9.00E-16 |
| 2558671112 | DRAFT_01780 | Locus_type     | CDS                                                                            |          |
| 2558671112 | DRAFT_01780 | Product_name   | ADP-ribose pyrophosphatase                                                     |          |
| 2558671112 | DRAFT_01780 | Scaffold       | DRAFT_contig_70_1231_len_7151_read_count_125048.63                             |          |
| 2558671112 | DRAFT_01780 | Coordinates    | 4118..4573(-)                                                                  |          |
| 2558671112 | DRAFT_01780 | DNA_length     | 456bp                                                                          |          |
| 2558671112 | DRAFT_01780 | Protein_length | 151aa                                                                          |          |
| 2558671112 | DRAFT_01780 | GC             |                                                                                | 0.55     |
| 2558671113 | DRAFT_01781 | pfam08445      | FR47                                                                           | 1.10E-13 |
| 2558671113 | DRAFT_01781 | Locus_type     | CDS                                                                            |          |

|            |             |                |                                                           |          |
|------------|-------------|----------------|-----------------------------------------------------------|----------|
| 2558671113 | DRAFT_01781 | Product_name   | Sortase and related acyltransferases                      |          |
| 2558671113 | DRAFT_01781 | Scaffold       | DRAFT_contig_70_1231_len_7151_read_count_125048.63        |          |
| 2558671113 | DRAFT_01781 | Coordinates    | 4843..5202(+)                                             |          |
| 2558671113 | DRAFT_01781 | DNA_length     | 360bp                                                     |          |
| 2558671113 | DRAFT_01781 | Protein_length | 119aa                                                     |          |
| 2558671113 | DRAFT_01781 | GC             |                                                           | 0.58     |
| 2558671114 | DRAFT_01782 | pfam13847      | Methyltransf_31                                           | 3.20E-24 |
| 2558671114 | DRAFT_01782 | Locus_type     | CDS                                                       |          |
| 2558671114 | DRAFT_01782 | Product_name   | Methylase involved in ubiquinone/menaquinone biosynthesis |          |
| 2558671114 | DRAFT_01782 | Scaffold       | DRAFT_contig_70_1231_len_7151_read_count_125048.63        |          |
| 2558671114 | DRAFT_01782 | Coordinates    | 5255..6058(-)                                             |          |
| 2558671114 | DRAFT_01782 | DNA_length     | 804bp                                                     |          |
| 2558671114 | DRAFT_01782 | Protein_length | 267aa                                                     |          |
| 2558671114 | DRAFT_01782 | GC             |                                                           | 0.48     |
| 2558671115 | DRAFT_01783 | pfam06197      | DUF998                                                    | 2.90E-08 |
| 2558671115 | DRAFT_01783 | Locus_type     | CDS                                                       |          |
| 2558671115 | DRAFT_01783 | Product_name   | Protein of unknown function (DUF998)                      |          |
| 2558671115 | DRAFT_01783 | Scaffold       | DRAFT_contig_70_1231_len_7151_read_count_125048.63        |          |
| 2558671115 | DRAFT_01783 | Coordinates    | 6143..6532(+)                                             |          |
| 2558671115 | DRAFT_01783 | DNA_length     | 390bp                                                     |          |
| 2558671115 | DRAFT_01783 | Protein_length | 129aa                                                     |          |
| 2558671115 | DRAFT_01783 | GC             |                                                           | 0.57     |
| 2558671115 | DRAFT_01783 | Transmembrane  | Yes                                                       |          |
| 2558671116 | DRAFT_01784 | pfam10604      | Polyketide_cyc2                                           | 6.60E-05 |
| 2558671116 | DRAFT_01784 | Locus_type     | CDS                                                       |          |
| 2558671116 | DRAFT_01784 | Product_name   | Polyketide cyclase / dehydrase and lipid transport        |          |
| 2558671116 | DRAFT_01784 | Scaffold       | DRAFT_contig_70_1231_len_7151_read_count_125048.63        |          |
| 2558671116 | DRAFT_01784 | Coordinates    | 6777..7148(-)                                             |          |
| 2558671116 | DRAFT_01784 | DNA_length     | 372bp                                                     |          |
| 2558671116 | DRAFT_01784 | Protein_length | 123aa                                                     |          |
| 2558671116 | DRAFT_01784 | GC             |                                                           | 0.53     |

|            |             |                |                                                           |          |
|------------|-------------|----------------|-----------------------------------------------------------|----------|
| 2558671117 | DRAFT_01785 | COG_category   | [S] Function unknown                                      |          |
| 2558671117 | DRAFT_01785 | COG1814        | Uncharacterized membrane protein                          | 5.00E-12 |
| 2558671117 | DRAFT_01785 | pfam01988      | VIT1                                                      | 7.60E-44 |
| 2558671117 | DRAFT_01785 | Locus_type     | CDS                                                       |          |
| 2558671117 | DRAFT_01785 | Product_name   | Uncharacterized membrane protein                          |          |
| 2558671117 | DRAFT_01785 | Scaffold       | DRAFT_contig_70_1291_len_6963_read_count_112826.64        |          |
| 2558671117 | DRAFT_01785 | Coordinates    | 3..647(-)                                                 |          |
| 2558671117 | DRAFT_01785 | DNA_length     | 645bp                                                     |          |
| 2558671117 | DRAFT_01785 | Protein_length | 215aa                                                     |          |
| 2558671117 | DRAFT_01785 | GC             |                                                           | 0.55     |
| 2558671117 | DRAFT_01785 | Transmembrane  | Yes                                                       |          |
| 2558671118 | DRAFT_01786 | pfam08241      | Methyltransf_11                                           | 7.80E-21 |
| 2558671118 | DRAFT_01786 | Locus_type     | CDS                                                       |          |
| 2558671118 | DRAFT_01786 | Product_name   | Methylase involved in ubiquinone/menaquinone biosynthesis |          |
| 2558671118 | DRAFT_01786 | Scaffold       | DRAFT_contig_70_1291_len_6963_read_count_112826.64        |          |
| 2558671118 | DRAFT_01786 | Coordinates    | 788..1567(-)                                              |          |
| 2558671118 | DRAFT_01786 | DNA_length     | 780bp                                                     |          |
| 2558671118 | DRAFT_01786 | Protein_length | 259aa                                                     |          |
| 2558671118 | DRAFT_01786 | GC             |                                                           | 0.56     |
| 2558671118 | DRAFT_01786 | Transmembrane  | Yes                                                       |          |
| 2558671119 | DRAFT_01787 | Locus_type     | CDS                                                       |          |
| 2558671119 | DRAFT_01787 | Product_name   | hypothetical protein                                      |          |
| 2558671119 | DRAFT_01787 | Scaffold       | DRAFT_contig_70_1291_len_6963_read_count_112826.64        |          |
| 2558671119 | DRAFT_01787 | Coordinates    | 1775..1984(-)                                             |          |
| 2558671119 | DRAFT_01787 | DNA_length     | 210bp                                                     |          |
| 2558671119 | DRAFT_01787 | Protein_length | 69aa                                                      |          |
| 2558671119 | DRAFT_01787 | GC             |                                                           | 0.47     |
| 2558671120 | DRAFT_01788 | IMG_pathway    | 146: Chorismate synthesis                                 |          |
| 2558671120 | DRAFT_01788 | IMG_pathway    | 519: Archaeal chorismate synthesis                        |          |
| 2558671120 | DRAFT_01788 | COG_category   | [E] Amino acid transport and metabolism                   |          |

|            |             |                |                                                                                          |          |
|------------|-------------|----------------|------------------------------------------------------------------------------------------|----------|
| 2558671120 | DRAFT_01788 | COG0703        | Shikimate kinase                                                                         | 2.00E-03 |
| 2558671120 | DRAFT_01788 | pfam13238      | AAA_18                                                                                   | 3.10E-14 |
| 2558671120 | DRAFT_01788 | ITERM:00339    | shikimate kinase (EC 2.7.1.71)                                                           |          |
| 2558671120 | DRAFT_01788 | Locus_type     | CDS                                                                                      |          |
| 2558671120 | DRAFT_01788 | Product_name   | shikimate kinase (EC 2.7.1.71)                                                           |          |
| 2558671120 | DRAFT_01788 | Scaffold       | DRAFT_contig_70_1291_len_6963_read_count_112826.64                                       |          |
| 2558671120 | DRAFT_01788 | Coordinates    | 2022..2615(-)                                                                            |          |
| 2558671120 | DRAFT_01788 | DNA_length     | 594bp                                                                                    |          |
| 2558671120 | DRAFT_01788 | Protein_length | 197aa                                                                                    |          |
| 2558671120 | DRAFT_01788 | GC             |                                                                                          | 0.57     |
| 2558671121 | DRAFT_01789 | Locus_type     | CDS                                                                                      |          |
| 2558671121 | DRAFT_01789 | Product_name   | hypothetical protein                                                                     |          |
| 2558671121 | DRAFT_01789 | Scaffold       | DRAFT_contig_70_1291_len_6963_read_count_112826.64                                       |          |
| 2558671121 | DRAFT_01789 | Coordinates    | 2734..2919(-)                                                                            |          |
| 2558671121 | DRAFT_01789 | DNA_length     | 186bp                                                                                    |          |
| 2558671121 | DRAFT_01789 | Protein_length | 61aa                                                                                     |          |
| 2558671121 | DRAFT_01789 | GC             |                                                                                          | 0.52     |
| 2558671122 | DRAFT_01790 | Locus_type     | CDS                                                                                      |          |
| 2558671122 | DRAFT_01790 | Product_name   | hypothetical protein                                                                     |          |
| 2558671122 | DRAFT_01790 | Scaffold       | DRAFT_contig_70_1291_len_6963_read_count_112826.64                                       |          |
| 2558671122 | DRAFT_01790 | Coordinates    | 3181..3546(+)                                                                            |          |
| 2558671122 | DRAFT_01790 | DNA_length     | 366bp                                                                                    |          |
| 2558671122 | DRAFT_01790 | Protein_length | 121aa                                                                                    |          |
| 2558671122 | DRAFT_01790 | GC             |                                                                                          | 0.55     |
| 2558671122 | DRAFT_01790 | Transmembrane  | Yes                                                                                      |          |
| 2558671123 | DRAFT_01791 | KEGG_module    | M00577: Biotin biosynthesis, BioW pathway, pimelate => pimeloyl-CoA => biotin            |          |
| 2558671123 | DRAFT_01791 | KEGG_module    | M00573: Biotin biosynthesis, Biol pathway, long-chain-acyl-ACP => pimeloyl-ACP => biotin |          |
| 2558671123 | DRAFT_01791 | KEGG_module    | M00123: Biotin biosynthesis, pimeloyl-ACP/CoA => biotin                                  |          |
| 2558671123 | DRAFT_01791 | Metacyc        | PWY0-1507: biotin biosynthesis from 7-keto-8-aminopelargonate                            |          |
| 2558671123 | DRAFT_01791 | COG_category   | [H] Coenzyme transport and metabolism                                                    |          |
| 2558671123 | DRAFT_01791 | COG0502        | Biotin synthase and related enzymes                                                      | 6.00E-26 |

|            |             |                |                                                    |          |
|------------|-------------|----------------|----------------------------------------------------|----------|
| 2558671123 | DRAFT_01791 | pfam04055      | Radical_SAM                                        | 2.30E-09 |
| 2558671123 | DRAFT_01791 | EC:2.8.1.6     | Biotin synthase.                                   |          |
| 2558671123 | DRAFT_01791 | KO:K01012      | biotin synthase [EC:2.8.1.6]                       | 3.00E-42 |
| 2558671123 | DRAFT_01791 | Locus_type     | CDS                                                |          |
| 2558671123 | DRAFT_01791 | Product_name   | Biotin synthase and related enzymes                |          |
| 2558671123 | DRAFT_01791 | Scaffold       | DRAFT_contig_70_1291_len_6963_read_count_112826.64 |          |
| 2558671123 | DRAFT_01791 | Coordinates    | 3699..4730(-)                                      |          |
| 2558671123 | DRAFT_01791 | DNA_length     | 1032bp                                             |          |
| 2558671123 | DRAFT_01791 | Protein_length | 343aa                                              |          |
| 2558671123 | DRAFT_01791 | GC             |                                                    | 0.56     |
| 2558671124 | DRAFT_01792 | COG_category   | [R] General function prediction only               |          |
| 2558671124 | DRAFT_01792 | COG0384        | Predicted epimerase, PhzC/PhzF homolog             | 3.00E-67 |
| 2558671124 | DRAFT_01792 | pfam02567      | PhzC-PhzF                                          | 1.20E-61 |
| 2558671124 | DRAFT_01792 | TIGR00654      | phenazine biosynthesis protein PhzF family         | 6.40E-66 |
| 2558671124 | DRAFT_01792 | Locus_type     | CDS                                                |          |
| 2558671124 | DRAFT_01792 | Product_name   | phenazine biosynthesis protein PhzF family         |          |
| 2558671124 | DRAFT_01792 | Scaffold       | DRAFT_contig_70_1291_len_6963_read_count_112826.64 |          |
| 2558671124 | DRAFT_01792 | Coordinates    | 4861..5982(+)                                      |          |
| 2558671124 | DRAFT_01792 | DNA_length     | 1122bp                                             |          |
| 2558671124 | DRAFT_01792 | Protein_length | 373aa                                              |          |
| 2558671124 | DRAFT_01792 | GC             |                                                    | 0.59     |
| 2558671125 | DRAFT_01793 | Locus_type     | CDS                                                |          |
| 2558671125 | DRAFT_01793 | Product_name   | hypothetical protein                               |          |
| 2558671125 | DRAFT_01793 | Scaffold       | DRAFT_contig_70_1291_len_6963_read_count_112826.64 |          |
| 2558671125 | DRAFT_01793 | Coordinates    | 6171..6671(+)                                      |          |
| 2558671125 | DRAFT_01793 | DNA_length     | 501bp                                              |          |
| 2558671125 | DRAFT_01793 | Protein_length | 166aa                                              |          |
| 2558671125 | DRAFT_01793 | GC             |                                                    | 0.52     |
| 2558671126 | DRAFT_01794 | Locus_type     | CDS                                                |          |
| 2558671126 | DRAFT_01794 | Product_name   | hypothetical protein                               |          |
| 2558671126 | DRAFT_01794 | Scaffold       | DRAFT_contig_70_1291_len_6963_read_count_112826.64 |          |

|            |             |                |                                                    |          |
|------------|-------------|----------------|----------------------------------------------------|----------|
| 2558671126 | DRAFT_01794 | Coordinates    | 6719..6961(-)                                      |          |
| 2558671126 | DRAFT_01794 | DNA_length     | 243bp                                              |          |
| 2558671126 | DRAFT_01794 | Protein_length | 80aa                                               |          |
| 2558671126 | DRAFT_01794 | GC             |                                                    | 0.57     |
| 2558671127 | DRAFT_01795 | pfam10604      | Polyketide_cyc2                                    | 4.20E-08 |
| 2558671127 | DRAFT_01795 | Locus_type     | CDS                                                |          |
| 2558671127 | DRAFT_01795 | Product_name   | Polyketide cyclase / dehydrase and lipid transport |          |
| 2558671127 | DRAFT_01795 | Scaffold       | DRAFT_contig_70_1364_len_6738_read_count_111437.65 |          |
| 2558671127 | DRAFT_01795 | Coordinates    | 1..135(-)                                          |          |
| 2558671127 | DRAFT_01795 | DNA_length     | 135bp                                              |          |
| 2558671127 | DRAFT_01795 | Protein_length | 45aa                                               |          |
| 2558671127 | DRAFT_01795 | GC             |                                                    | 0.5      |
| 2558671128 | DRAFT_01796 | Metacyc        | PWY-5386: methylglyoxal degradation I              |          |
| 2558671128 | DRAFT_01796 | COG_category   | [E] Amino acid transport and metabolism            |          |
| 2558671128 | DRAFT_01796 | COG0346        | Lactoylglutathione lyase and related lyases        | 2.00E-05 |
| 2558671128 | DRAFT_01796 | pfam13669      | Glyoxalase_4                                       | 1.60E-12 |
| 2558671128 | DRAFT_01796 | EC:4.4.1.5     | Lactoylglutathione lyase.                          |          |
| 2558671128 | DRAFT_01796 | KO:K01759      | lactoylglutathione lyase [EC:4.4.1.5]              | 5.30E-11 |
| 2558671128 | DRAFT_01796 | Locus_type     | CDS                                                |          |
| 2558671128 | DRAFT_01796 | Product_name   | Lactoylglutathione lyase and related lyases        |          |
| 2558671128 | DRAFT_01796 | Scaffold       | DRAFT_contig_70_1364_len_6738_read_count_111437.65 |          |
| 2558671128 | DRAFT_01796 | Coordinates    | 410..817(+)                                        |          |
| 2558671128 | DRAFT_01796 | DNA_length     | 408bp                                              |          |
| 2558671128 | DRAFT_01796 | Protein_length | 135aa                                              |          |
| 2558671128 | DRAFT_01796 | GC             |                                                    | 0.55     |
| 2558671129 | DRAFT_01797 | Locus_type     | CDS                                                |          |
| 2558671129 | DRAFT_01797 | Product_name   | hypothetical protein                               |          |
| 2558671129 | DRAFT_01797 | Scaffold       | DRAFT_contig_70_1364_len_6738_read_count_111437.65 |          |
| 2558671129 | DRAFT_01797 | Coordinates    | 961..1350(+)                                       |          |
| 2558671129 | DRAFT_01797 | DNA_length     | 390bp                                              |          |
| 2558671129 | DRAFT_01797 | Protein_length | 129aa                                              |          |



|            |             |                |                                                    |          |
|------------|-------------|----------------|----------------------------------------------------|----------|
| 2558671129 | DRAFT_01797 | GC             |                                                    | 0.49     |
| 2558671130 | DRAFT_01798 | Locus_type     | CDS                                                |          |
| 2558671130 | DRAFT_01798 | Product_name   | hypothetical protein                               |          |
| 2558671130 | DRAFT_01798 | Scaffold       | DRAFT_contig_70_1364_len_6738_read_count_111437.65 |          |
| 2558671130 | DRAFT_01798 | Coordinates    | 1682..3511(-)                                      |          |
| 2558671130 | DRAFT_01798 | DNA_length     | 1830bp                                             |          |
| 2558671130 | DRAFT_01798 | Protein_length | 609aa                                              |          |
| 2558671130 | DRAFT_01798 | GC             |                                                    | 0.59     |
| 2558671130 | DRAFT_01798 | Transmembrane  | Yes                                                |          |
| 2558671131 | DRAFT_01799 | Locus_type     | CDS                                                |          |
| 2558671131 | DRAFT_01799 | Product_name   | hypothetical protein                               |          |
| 2558671131 | DRAFT_01799 | Scaffold       | DRAFT_contig_70_1364_len_6738_read_count_111437.65 |          |
| 2558671131 | DRAFT_01799 | Coordinates    | 3518..3994(-)                                      |          |
| 2558671131 | DRAFT_01799 | DNA_length     | 477bp                                              |          |
| 2558671131 | DRAFT_01799 | Protein_length | 158aa                                              |          |
| 2558671131 | DRAFT_01799 | GC             |                                                    | 0.59     |
| 2558671131 | DRAFT_01799 | Transmembrane  | Yes                                                |          |
| 2558671132 | DRAFT_01800 | Locus_type     | CDS                                                |          |
| 2558671132 | DRAFT_01800 | Product_name   | hypothetical protein                               |          |
| 2558671132 | DRAFT_01800 | Scaffold       | DRAFT_contig_70_1364_len_6738_read_count_111437.65 |          |
| 2558671132 | DRAFT_01800 | Coordinates    | 4086..5231(+)                                      |          |
| 2558671132 | DRAFT_01800 | DNA_length     | 1146bp                                             |          |
| 2558671132 | DRAFT_01800 | Protein_length | 381aa                                              |          |
| 2558671132 | DRAFT_01800 | GC             |                                                    | 0.59     |
| 2558671133 | DRAFT_01801 | pfam11999      | DUF3494                                            | 1.30E-70 |
| 2558671133 | DRAFT_01801 | Locus_type     | CDS                                                |          |
| 2558671133 | DRAFT_01801 | Product_name   | Protein of unknown function (DUF3494)              |          |
| 2558671133 | DRAFT_01801 | Scaffold       | DRAFT_contig_70_1364_len_6738_read_count_111437.65 |          |
| 2558671133 | DRAFT_01801 | Coordinates    | 5963..6736(-)                                      |          |
| 2558671133 | DRAFT_01801 | DNA_length     | 774bp                                              |          |

|            |             |                |                                                                           |          |
|------------|-------------|----------------|---------------------------------------------------------------------------|----------|
| 2558671133 | DRAFT_01801 | Protein_length | 257aa                                                                     |          |
| 2558671133 | DRAFT_01801 | GC             |                                                                           | 0.55     |
| 2558671134 | DRAFT_01802 | COG_category   | [O] Posttranslational modification, protein turnover, chaperones          |          |
| 2558671134 | DRAFT_01802 | COG_category   | [L] Replication, recombination and repair                                 |          |
| 2558671134 | DRAFT_01802 | COG1474        | Cdc6-related protein, AAA superfamily ATPase                              | 2.00E-44 |
| 2558671134 | DRAFT_01802 | pfam09079      | Cdc6_C                                                                    | 2.20E-17 |
| 2558671134 | DRAFT_01802 | pfam13401      | AAA_22                                                                    | 2.30E-11 |
| 2558671134 | DRAFT_01802 | TIGR02928      | orc1/cdc6 family replication initiation protein                           | 2.40E-74 |
| 2558671134 | DRAFT_01802 | KO:K10725      | archaeal cell division control protein 6                                  | 0.00E+00 |
| 2558671134 | DRAFT_01802 | Locus_type     | CDS                                                                       |          |
| 2558671134 | DRAFT_01802 | Product_name   | orc1/cdc6 family replication initiation protein                           |          |
| 2558671134 | DRAFT_01802 | Scaffold       | DRAFT_contig_70_1487_len_6446_read_count_115261.66                        |          |
| 2558671134 | DRAFT_01802 | Coordinates    | 3..1064(+)                                                                |          |
| 2558671134 | DRAFT_01802 | DNA_length     | 1062bp                                                                    |          |
| 2558671134 | DRAFT_01802 | Protein_length | 353aa                                                                     |          |
| 2558671134 | DRAFT_01802 | GC             |                                                                           | 0.59     |
| 2558671135 | DRAFT_01803 | Locus_type     | CDS                                                                       |          |
| 2558671135 | DRAFT_01803 | Product_name   | hypothetical protein                                                      |          |
| 2558671135 | DRAFT_01803 | Scaffold       | DRAFT_contig_70_1487_len_6446_read_count_115261.66                        |          |
| 2558671135 | DRAFT_01803 | Coordinates    | 1108..1347(+)                                                             |          |
| 2558671135 | DRAFT_01803 | DNA_length     | 240bp                                                                     |          |
| 2558671135 | DRAFT_01803 | Protein_length | 79aa                                                                      |          |
| 2558671135 | DRAFT_01803 | GC             |                                                                           | 0.58     |
| 2558671136 | DRAFT_01804 | pfam00004      | AAA                                                                       | 1.70E-12 |
| 2558671136 | DRAFT_01804 | KO:K04800      | replication factor C large subunit                                        | 0.00E+00 |
| 2558671136 | DRAFT_01804 | Locus_type     | CDS                                                                       |          |
| 2558671136 | DRAFT_01804 | Product_name   | ATPase related to the helicase subunit of the Holliday junction resolvase |          |
| 2558671136 | DRAFT_01804 | Scaffold       | DRAFT_contig_70_1487_len_6446_read_count_115261.66                        |          |
| 2558671136 | DRAFT_01804 | Coordinates    | 1340..2515(-)                                                             |          |
| 2558671136 | DRAFT_01804 | DNA_length     | 1176bp                                                                    |          |
| 2558671136 | DRAFT_01804 | Protein_length | 391aa                                                                     |          |

|            |             |              |                                                                                                  |          |
|------------|-------------|--------------|--------------------------------------------------------------------------------------------------|----------|
| 2558671136 | DRAFT_01804 | GC           |                                                                                                  | 0.59     |
| 2558671137 | DRAFT_01805 | KEGG_module  | M00117: Ubiquinone biosynthesis, prokaryotes, chorismate => ubiquinone                           |          |
| 2558671137 | DRAFT_01805 | Metacyc      | PWY-702: methionine biosynthesis II                                                              |          |
| 2558671137 | DRAFT_01805 | Metacyc      | PWY-4681: kievitone biosynthesis                                                                 |          |
| 2558671137 | DRAFT_01805 | Metacyc      | PWY-6793: demethylmenaquinol-8 biosynthesis III                                                  |          |
| 2558671137 | DRAFT_01805 | Metacyc      | PWY-6834: spermidine biosynthesis III                                                            |          |
| 2558671137 | DRAFT_01805 | Metacyc      | PWY-2681: <i>trans</i> -zeatin biosynthesis                                                      |          |
| 2558671137 | DRAFT_01805 | Metacyc      | PWY-5893: tridecaprenyl diphosphate biosynthesis                                                 |          |
| 2558671137 | DRAFT_01805 | Metacyc      | PWY-6403: carrageenan biosynthesis                                                               |          |
| 2558671137 | DRAFT_01805 | Metacyc      | PWY-5802: alizarin biosynthesis                                                                  |          |
| 2558671137 | DRAFT_01805 | Metacyc      | PWY-5132: humulone biosynthesis                                                                  |          |
| 2558671137 | DRAFT_01805 | Metacyc      | PWY-5027: phylloquinol biosynthesis                                                              |          |
| 2558671137 | DRAFT_01805 | Metacyc      | PWY-5770: phenazine-1-carboxylate biosynthesis                                                   |          |
| 2558671137 | DRAFT_01805 | Metacyc      | PWY-5135: xanthohumol biosynthesis                                                               |          |
| 2558671137 | DRAFT_01805 | Metacyc      | PWY-4502: wighteone and luteone biosynthesis                                                     |          |
| 2558671137 | DRAFT_01805 | Metacyc      | PWY-7169: hyperxanthone E biosynthesis                                                           |          |
| 2558671137 | DRAFT_01805 | Metacyc      | PWY-5068: chlorophyll cycle                                                                      |          |
| 2558671137 | DRAFT_01805 | Metacyc      | PWY-6681: neurosporaxanthin biosynthesis                                                         |          |
| 2558671137 | DRAFT_01805 | Metacyc      | PWY-5808: hyperforin and adhyperforin biosynthesis                                               |          |
| 2558671137 | DRAFT_01805 | Metacyc      | PWY-5817: dodecaprenyl diphosphate biosynthesis                                                  |          |
| 2558671137 | DRAFT_01805 | Metacyc      | PWY-6262: demethylmenaquinol-8 biosynthesis II                                                   |          |
| 2558671137 | DRAFT_01805 | Metacyc      | PWY-6936: seleno-amino acid biosynthesis                                                         |          |
| 2558671137 | DRAFT_01805 | Metacyc      | PWY-5064: chlorophyll <i>a</i> biosynthesis II                                                   |          |
| 2558671137 | DRAFT_01805 | Metacyc      | PWY-5816: all <i>trans</i> undecaprenyl diphosphate biosynthesis                                 |          |
| 2558671137 | DRAFT_01805 | Metacyc      | PWY-5365: linear furanocoumarin biosynthesis                                                     |          |
| 2558671137 | DRAFT_01805 | Metacyc      | PWY-5133: cohumulone biosynthesis                                                                |          |
| 2558671137 | DRAFT_01805 | COG_category | [H] Coenzyme transport and metabolism                                                            |          |
| 2558671137 | DRAFT_01805 | COG0382      | 4-hydroxybenzoate polyprenyltransferase and related prenyltransferases                           | 7.00E-27 |
| 2558671137 | DRAFT_01805 | pfam01040    | UbiA                                                                                             | 5.30E-34 |
| 2558671137 | DRAFT_01805 | EC:2.5.1.-   | Transferases. Transferring alkyl or aryl groups, other than methyl groups. Transferring alkyl or |          |
| 2558671137 | DRAFT_01805 | KO:K03179    | 4-hydroxybenzoate octaprenyltransferase [EC:2.5.1.-]                                             | 1.40E-43 |
| 2558671137 | DRAFT_01805 | Locus_type   | CDS                                                                                              |          |
| 2558671137 | DRAFT_01805 | Product_name | 4-hydroxybenzoate polyprenyltransferase and related prenyltransferases                           |          |

|            |             |                |                                                                              |           |
|------------|-------------|----------------|------------------------------------------------------------------------------|-----------|
| 2558671137 | DRAFT_01805 | Scaffold       | DRAFT_contig_70_1487_len_6446_read_count_115261.66                           |           |
| 2558671137 | DRAFT_01805 | Coordinates    | 2516..3313(-)                                                                |           |
| 2558671137 | DRAFT_01805 | DNA_length     | 798bp                                                                        |           |
| 2558671137 | DRAFT_01805 | Protein_length | 265aa                                                                        |           |
| 2558671137 | DRAFT_01805 | GC             |                                                                              | 0.6       |
| 2558671137 | DRAFT_01805 | Transmembrane  | Yes                                                                          |           |
| 2558671138 | DRAFT_01806 | Metacyc        | PWY-6689: tRNA splicing                                                      |           |
| 2558671138 | DRAFT_01806 | COG_category   | [J] Translation, ribosomal structure and biogenesis                          |           |
| 2558671138 | DRAFT_01806 | COG1676        | tRNA splicing endonuclease                                                   | 1.00E-16  |
| 2558671138 | DRAFT_01806 | pfam02778      | tRNA_int_endo_N                                                              | 1.10E-09  |
| 2558671138 | DRAFT_01806 | pfam01974      | tRNA_int_endo                                                                | 4.50E-19  |
| 2558671138 | DRAFT_01806 | EC:3.1.27.9    | tRNA-intron endonuclease.                                                    |           |
| 2558671138 | DRAFT_01806 | TIGR00324      | tRNA-intron endonuclease                                                     | 4.80E-25  |
| 2558671138 | DRAFT_01806 | KO:K01170      | tRNA-intron endonuclease, archaea type [EC:3.1.27.9]                         | 7.40E-41  |
| 2558671138 | DRAFT_01806 | Locus_type     | CDS                                                                          |           |
| 2558671138 | DRAFT_01806 | Product_name   | tRNA-intron endonuclease                                                     |           |
| 2558671138 | DRAFT_01806 | Scaffold       | DRAFT_contig_70_1487_len_6446_read_count_115261.66                           |           |
| 2558671138 | DRAFT_01806 | Coordinates    | 3366..3914(-)                                                                |           |
| 2558671138 | DRAFT_01806 | DNA_length     | 549bp                                                                        |           |
| 2558671138 | DRAFT_01806 | Protein_length | 182aa                                                                        |           |
| 2558671138 | DRAFT_01806 | GC             |                                                                              | 0.58      |
| 2558671139 | DRAFT_01807 | KEGG_module    | M00034: Methionine salvage pathway                                           |           |
| 2558671139 | DRAFT_01807 | Metacyc        | PWY-7174: <i>S</i>-methyl-5-thio-&alpha;-D-ribose 1-phosphate degradation II |           |
| 2558671139 | DRAFT_01807 | Metacyc        | PWY-6755: <i>S</i>-methyl-5-thio-&alpha;-D-ribose 1-phosphate degradation I  |           |
| 2558671139 | DRAFT_01807 | COG_category   | [J] Translation, ribosomal structure and biogenesis                          |           |
| 2558671139 | DRAFT_01807 | COG0182        | Predicted translation initiation factor 2B subunit, eIF-2B alpha/beta/de     | 5.00E-119 |
| 2558671139 | DRAFT_01807 | pfam01008      | IF-2B                                                                        | 9.70E-83  |
| 2558671139 | DRAFT_01807 | EC:5.3.1.23    | S-methyl-5-thioribose-1-phosphate isomerase.                                 |           |
| 2558671139 | DRAFT_01807 | TIGR00512      | S-methyl-5-thioribose-1-phosphate isomerase                                  | 2.80E-118 |
| 2558671139 | DRAFT_01807 | TIGR00524      | eIF-2B alpha/beta/delta-related uncharacterized proteins                     | 3.80E-117 |
| 2558671139 | DRAFT_01807 | KO:K08963      | methylthioribose-1-phosphate isomerase [EC:5.3.1.23]                         | 0.00E+00  |
| 2558671139 | DRAFT_01807 | Locus_type     | CDS                                                                          |           |

|            |             |                |                                                                      |          |
|------------|-------------|----------------|----------------------------------------------------------------------|----------|
| 2558671139 | DRAFT_01807 | Product_name   | S-methyl-5-thioribose-1-phosphate isomerase                          |          |
| 2558671139 | DRAFT_01807 | Scaffold       | DRAFT_contig_70_1487_len_6446_read_count_115261.66                   |          |
| 2558671139 | DRAFT_01807 | Coordinates    | 4018..5058(+)                                                        |          |
| 2558671139 | DRAFT_01807 | DNA_length     | 1041bp                                                               |          |
| 2558671139 | DRAFT_01807 | Protein_length | 346aa                                                                |          |
| 2558671139 | DRAFT_01807 | GC             |                                                                      | 0.6      |
| 2558671140 | DRAFT_01808 | pfam00571      | CBS                                                                  | 1.60E-12 |
| 2558671140 | DRAFT_01808 | pfam00571      | CBS                                                                  | 1.60E-09 |
| 2558671140 | DRAFT_01808 | Locus_type     | CDS                                                                  |          |
| 2558671140 | DRAFT_01808 | Product_name   | Predicted signal-transduction protein containing cAMP-binding and Cl |          |
| 2558671140 | DRAFT_01808 | Scaffold       | DRAFT_contig_70_1487_len_6446_read_count_115261.66                   |          |
| 2558671140 | DRAFT_01808 | Coordinates    | 5321..5758(+)                                                        |          |
| 2558671140 | DRAFT_01808 | DNA_length     | 438bp                                                                |          |
| 2558671140 | DRAFT_01808 | Protein_length | 145aa                                                                |          |
| 2558671140 | DRAFT_01808 | GC             |                                                                      | 0.53     |
| 2558671141 | DRAFT_01809 | Locus_type     | tRNA                                                                 |          |
| 2558671141 | DRAFT_01809 | Product_name   | tRNA_Arg_TCG                                                         |          |
| 2558671141 | DRAFT_01809 | Scaffold       | DRAFT_contig_70_1487_len_6446_read_count_115261.66                   |          |
| 2558671141 | DRAFT_01809 | Coordinates    | 6369..6443(+)                                                        |          |
| 2558671141 | DRAFT_01809 | DNA_length     | 75bp                                                                 |          |
| 2558671141 | DRAFT_01809 | GC             |                                                                      | 0.57     |
| 2558671142 | DRAFT_01810 | COG_category   | [P] Inorganic ion transport and metabolism                           |          |
| 2558671142 | DRAFT_01810 | COG0474        | Cation transport ATPase                                              | 0.00E+00 |
| 2558671142 | DRAFT_01810 | pfam00702      | Hydrolase                                                            | 1.50E-25 |
| 2558671142 | DRAFT_01810 | pfam00689      | Cation_ATPase_C                                                      | 4.80E-18 |
| 2558671142 | DRAFT_01810 | pfam00122      | E1-E2_ATPase                                                         | 2.70E-57 |
| 2558671142 | DRAFT_01810 | EC:3.6.3.2     | Magnesium-importing ATPase.                                          |          |
| 2558671142 | DRAFT_01810 | TIGR01524      | magnesium-translocating P-type ATPase                                | 0.00E+00 |
| 2558671142 | DRAFT_01810 | TIGR01494      | ATPase, P-type (transporting), HAD superfamily, subfamily IC         | 9.80E-42 |
| 2558671142 | DRAFT_01810 | KO:K01531      | Mg2+-importing ATPase [EC:3.6.3.2]                                   | 0.00E+00 |
| 2558671142 | DRAFT_01810 | Locus_type     | CDS                                                                  |          |

|            |             |                |                                                    |      |
|------------|-------------|----------------|----------------------------------------------------|------|
| 2558671142 | DRAFT_01810 | Product_name   | magnesium-translocating P-type ATPase              |      |
| 2558671142 | DRAFT_01810 | Scaffold       | DRAFT_contig_70_1564_len_6279_read_count_119203.67 |      |
| 2558671142 | DRAFT_01810 | Coordinates    | 776..3052(+)                                       |      |
| 2558671142 | DRAFT_01810 | DNA_length     | 2277bp                                             |      |
| 2558671142 | DRAFT_01810 | Protein_length | 758aa                                              |      |
| 2558671142 | DRAFT_01810 | GC             |                                                    | 0.58 |
| 2558671142 | DRAFT_01810 | Transmembrane  | Yes                                                |      |
|            |             |                |                                                    |      |
| 2558671143 | DRAFT_01811 | Locus_type     | CDS                                                |      |
| 2558671143 | DRAFT_01811 | Product_name   | hypothetical protein                               |      |
| 2558671143 | DRAFT_01811 | Scaffold       | DRAFT_contig_70_1564_len_6279_read_count_119203.67 |      |
| 2558671143 | DRAFT_01811 | Coordinates    | 3397..3939(-)                                      |      |
| 2558671143 | DRAFT_01811 | DNA_length     | 543bp                                              |      |
| 2558671143 | DRAFT_01811 | Protein_length | 180aa                                              |      |
| 2558671143 | DRAFT_01811 | GC             |                                                    | 0.55 |
|            |             |                |                                                    |      |
| 2558671144 | DRAFT_01812 | Locus_type     | CDS                                                |      |
| 2558671144 | DRAFT_01812 | Product_name   | hypothetical protein                               |      |
| 2558671144 | DRAFT_01812 | Scaffold       | DRAFT_contig_70_1564_len_6279_read_count_119203.67 |      |
| 2558671144 | DRAFT_01812 | Coordinates    | 3984..4151(+)                                      |      |
| 2558671144 | DRAFT_01812 | DNA_length     | 168bp                                              |      |
| 2558671144 | DRAFT_01812 | Protein_length | 55aa                                               |      |
| 2558671144 | DRAFT_01812 | GC             |                                                    | 0.52 |
|            |             |                |                                                    |      |
| 2558671145 | DRAFT_01813 | Locus_type     | CDS                                                |      |
| 2558671145 | DRAFT_01813 | Product_name   | hypothetical protein                               |      |
| 2558671145 | DRAFT_01813 | Scaffold       | DRAFT_contig_70_1564_len_6279_read_count_119203.67 |      |
| 2558671145 | DRAFT_01813 | Coordinates    | 5158..5427(-)                                      |      |
| 2558671145 | DRAFT_01813 | DNA_length     | 270bp                                              |      |
| 2558671145 | DRAFT_01813 | Protein_length | 89aa                                               |      |
| 2558671145 | DRAFT_01813 | GC             |                                                    | 0.55 |
|            |             |                |                                                    |      |
| 2558671146 | DRAFT_01814 | Locus_type     | CDS                                                |      |
| 2558671146 | DRAFT_01814 | Product_name   | hypothetical protein                               |      |

|            |             |                |                                                         |          |
|------------|-------------|----------------|---------------------------------------------------------|----------|
| 2558671146 | DRAFT_01814 | Scaffold       | DRAFT_contig_70_1564_len_6279_read_count_119203.67      |          |
| 2558671146 | DRAFT_01814 | Coordinates    | 6008..6277(-)                                           |          |
| 2558671146 | DRAFT_01814 | DNA_length     | 270bp                                                   |          |
| 2558671146 | DRAFT_01814 | Protein_length | 89aa                                                    |          |
| 2558671146 | DRAFT_01814 | GC             |                                                         | 0.5      |
| 2558671147 | DRAFT_01815 | KEGG_module    | M00254: ABC-2 type transport system                     |          |
| 2558671147 | DRAFT_01815 | COG_category   | [V] Defense mechanisms                                  |          |
| 2558671147 | DRAFT_01815 | COG0842        | ABC-type multidrug transport system, permease component | 6.00E-06 |
| 2558671147 | DRAFT_01815 | pfam01061      | ABC2_membrane                                           | 2.60E-14 |
| 2558671147 | DRAFT_01815 | KO:K01992      | ABC-2 type transport system permease protein            | 0.00E+00 |
| 2558671147 | DRAFT_01815 | Locus_type     | CDS                                                     |          |
| 2558671147 | DRAFT_01815 | Product_name   | ABC-type multidrug transport system, permease component |          |
| 2558671147 | DRAFT_01815 | Scaffold       | DRAFT_contig_70_1585_len_6250_read_count_103009.68      |          |
| 2558671147 | DRAFT_01815 | Coordinates    | 66..764(-)                                              |          |
| 2558671147 | DRAFT_01815 | DNA_length     | 699bp                                                   |          |
| 2558671147 | DRAFT_01815 | Protein_length | 232aa                                                   |          |
| 2558671147 | DRAFT_01815 | GC             |                                                         | 0.57     |
| 2558671147 | DRAFT_01815 | Transmembrane  | Yes                                                     |          |
| 2558671148 | DRAFT_01816 | KEGG_module    | M00254: ABC-2 type transport system                     |          |
| 2558671148 | DRAFT_01816 | COG_category   | [V] Defense mechanisms                                  |          |
| 2558671148 | DRAFT_01816 | COG1131        | ABC-type multidrug transport system, ATPase component   | 6.00E-61 |
| 2558671148 | DRAFT_01816 | pfam00005      | ABC_tran                                                | 3.60E-28 |
| 2558671148 | DRAFT_01816 | KO:K01990      | ABC-2 type transport system ATP-binding protein         | 0.00E+00 |
| 2558671148 | DRAFT_01816 | Locus_type     | CDS                                                     |          |
| 2558671148 | DRAFT_01816 | Product_name   | ABC-type multidrug transport system, ATPase component   |          |
| 2558671148 | DRAFT_01816 | Scaffold       | DRAFT_contig_70_1585_len_6250_read_count_103009.68      |          |
| 2558671148 | DRAFT_01816 | Coordinates    | 818..1771(-)                                            |          |
| 2558671148 | DRAFT_01816 | DNA_length     | 954bp                                                   |          |
| 2558671148 | DRAFT_01816 | Protein_length | 317aa                                                   |          |
| 2558671148 | DRAFT_01816 | GC             |                                                         | 0.6      |
| 2558671149 | DRAFT_01817 | pfam05048      | NosD                                                    | 1.10E-05 |

|            |             |                |                                                                                |          |
|------------|-------------|----------------|--------------------------------------------------------------------------------|----------|
| 2558671149 | DRAFT_01817 | Locus_type     | CDS                                                                            |          |
| 2558671149 | DRAFT_01817 | Product_name   | Periplasmic copper-binding protein (NosD)                                      |          |
| 2558671149 | DRAFT_01817 | Scaffold       | DRAFT_contig_70_1585_len_6250_read_count_103009.68                             |          |
| 2558671149 | DRAFT_01817 | Coordinates    | 2170..4044(+)                                                                  |          |
| 2558671149 | DRAFT_01817 | DNA_length     | 1875bp                                                                         |          |
| 2558671149 | DRAFT_01817 | Protein_length | 624aa                                                                          |          |
| 2558671149 | DRAFT_01817 | GC             |                                                                                | 0.54     |
| 2558671149 | DRAFT_01817 | Transmembrane  | Yes                                                                            |          |
| 2558671150 | DRAFT_01818 | pfam05048      | NosD                                                                           | 8.50E-19 |
| 2558671150 | DRAFT_01818 | TIGR03804      | parallel beta-helix repeat (two copies)                                        | 1.40E-14 |
| 2558671150 | DRAFT_01818 | Locus_type     | CDS                                                                            |          |
| 2558671150 | DRAFT_01818 | Product_name   | parallel beta-helix repeat (two copies)                                        |          |
| 2558671150 | DRAFT_01818 | Scaffold       | DRAFT_contig_70_1585_len_6250_read_count_103009.68                             |          |
| 2558671150 | DRAFT_01818 | Coordinates    | 4314..4919(-)                                                                  |          |
| 2558671150 | DRAFT_01818 | DNA_length     | 606bp                                                                          |          |
| 2558671150 | DRAFT_01818 | Protein_length | 201aa                                                                          |          |
| 2558671150 | DRAFT_01818 | GC             |                                                                                | 0.54     |
| 2558671150 | DRAFT_01818 | Transmembrane  | Yes                                                                            |          |
| 2558671151 | DRAFT_01819 | pfam05048      | NosD                                                                           | 1.30E-12 |
| 2558671151 | DRAFT_01819 | pfam05048      | NosD                                                                           | 2.30E-20 |
| 2558671151 | DRAFT_01819 | TIGR03804      | parallel beta-helix repeat (two copies)                                        | 1.30E-13 |
| 2558671151 | DRAFT_01819 | Locus_type     | CDS                                                                            |          |
| 2558671151 | DRAFT_01819 | Product_name   | parallel beta-helix repeat (two copies)                                        |          |
| 2558671151 | DRAFT_01819 | Scaffold       | DRAFT_contig_70_1585_len_6250_read_count_103009.68                             |          |
| 2558671151 | DRAFT_01819 | Coordinates    | 5019..6248(-)                                                                  |          |
| 2558671151 | DRAFT_01819 | DNA_length     | 1230bp                                                                         |          |
| 2558671151 | DRAFT_01819 | Protein_length | 409aa                                                                          |          |
| 2558671151 | DRAFT_01819 | GC             |                                                                                | 0.53     |
| 2558671152 | DRAFT_01820 | KEGG_module    | M00011: Citrate cycle, second carbon oxidation, 2-oxoglutarate => oxaloacetate |          |
| 2558671152 | DRAFT_01820 | KEGG_module    | M00173: Reductive citric acid cycle (Arnon-Buchanan cycle)                     |          |
| 2558671152 | DRAFT_01820 | KEGG_module    | M00009: Citrate cycle (TCA cycle, Krebs cycle)                                 |          |



|            |             |              |                                                                      |          |
|------------|-------------|--------------|----------------------------------------------------------------------|----------|
| 2558671152 | DRAFT_01820 | KEGG_module  | M00374: Dicarboxylate-hydroxybutyrate cycle                          |          |
| 2558671152 | DRAFT_01820 | KEGG_module  | M00376: 3-Hydroxypropionate bicycle                                  |          |
| 2558671152 | DRAFT_01820 | Metacyc      | FERMENTATION-PWY: mixed acid fermentation                            |          |
| 2558671152 | DRAFT_01820 | Metacyc      | TCA: TCA cycle I (prokaryotic)                                       |          |
| 2558671152 | DRAFT_01820 | Metacyc      | ANARESP1-PWY: respiration (anaerobic)                                |          |
| 2558671152 | DRAFT_01820 | Metacyc      | PWY-561: superpathway of glyoxylate cycle and fatty acid degradation |          |
| 2558671152 | DRAFT_01820 | Metacyc      | REDCITCYC: TCA cycle III (helicobacter)                              |          |
| 2558671152 | DRAFT_01820 | Metacyc      | PWY-6969: TCA cycle V (2-oxoglutarate:ferredoxin oxidoreductase)     |          |
| 2558671152 | DRAFT_01820 | Metacyc      | PWY-5913: TCA cycle VI (obligate autotrophs)                         |          |
| 2558671152 | DRAFT_01820 | Metacyc      | P108-PWY: pyruvate fermentation to propionate I                      |          |
| 2558671152 | DRAFT_01820 | Metacyc      | PWY-6728: methylaspartate cycle                                      |          |
| 2558671152 | DRAFT_01820 | Metacyc      | P23-PWY: reductive TCA cycle I                                       |          |
| 2558671152 | DRAFT_01820 | Metacyc      | PWY-5690: TCA cycle II (eukaryotic)                                  |          |
| 2558671152 | DRAFT_01820 | Metacyc      | P105-PWY: TCA cycle IV (2-oxoglutarate decarboxylase)                |          |
| 2558671152 | DRAFT_01820 | Metacyc      | P42-PWY: incomplete reductive TCA cycle                              |          |
| 2558671152 | DRAFT_01820 | Metacyc      | PWY-5392: reductive TCA cycle II                                     |          |
| 2558671152 | DRAFT_01820 | IMG_pathway  | 1014: Dicarboxylate/4-hydroxybutyrate cycle                          |          |
| 2558671152 | DRAFT_01820 | IMG_pathway  | 308: 2-oxoglutarate synthesis by partial reverse TCA cycle           |          |
| 2558671152 | DRAFT_01820 | IMG_pathway  | 334: Tricarboxylic acid cycle                                        |          |
| 2558671152 | DRAFT_01820 | IMG_pathway  | 335: Acetyl-CoA synthesis by reverse TCA cycle                       |          |
| 2558671152 | DRAFT_01820 | IMG_pathway  | 370: Oxaloacetate conversion to propionate via methylmalonyl-CoA     |          |
| 2558671152 | DRAFT_01820 | IMG_pathway  | 525: Hydroxypropionate cycle                                         |          |
| 2558671152 | DRAFT_01820 | IMG_pathway  | 960: Glyoxalate from acetyl-CoA via isocitrate lyase cycle           |          |
| 2558671152 | DRAFT_01820 | IMG_pathway  | 962: Glyoxylate from acetyl-CoA via ethylmalonyl-CoA pathway         |          |
| 2558671152 | DRAFT_01820 | COG_category | [C] Energy production and conversion                                 |          |
| 2558671152 | DRAFT_01820 | COG0114      | Fumarase                                                             | 0.00E+00 |
| 2558671152 | DRAFT_01820 | pfam00206    | Lyase_1                                                              | 3.30E-81 |
| 2558671152 | DRAFT_01820 | pfam10415    | FumaraseC_C                                                          | 3.00E-07 |
| 2558671152 | DRAFT_01820 | EC:4.2.1.2   | Fumarate hydratase.                                                  |          |
| 2558671152 | DRAFT_01820 | KO:K01679    | fumarate hydratase, class II [EC:4.2.1.2]                            | 0.00E+00 |
| 2558671152 | DRAFT_01820 | ITERM:01347  | fumarase, class II (EC 4.2.1.2)                                      |          |
| 2558671152 | DRAFT_01820 | Locus_type   | CDS                                                                  |          |
| 2558671152 | DRAFT_01820 | Product_name | fumarase, class II (EC 4.2.1.2)                                      |          |
| 2558671152 | DRAFT_01820 | Scaffold     | DRAFT_contig_70_1826_len_5843_read_count_86513.69                    |          |

|            |             |                |                                                                 |          |
|------------|-------------|----------------|-----------------------------------------------------------------|----------|
| 2558671152 | DRAFT_01820 | Coordinates    | 45..1370(+)                                                     |          |
| 2558671152 | DRAFT_01820 | DNA_length     | 1326bp                                                          |          |
| 2558671152 | DRAFT_01820 | Protein_length | 441aa                                                           |          |
| 2558671152 | DRAFT_01820 | GC             |                                                                 | 0.59     |
| 2558671153 | DRAFT_01821 | Locus_type     | CDS                                                             |          |
| 2558671153 | DRAFT_01821 | Product_name   | hypothetical protein                                            |          |
| 2558671153 | DRAFT_01821 | Scaffold       | DRAFT_contig_70_1826_len_5843_read_count_86513.69               |          |
| 2558671153 | DRAFT_01821 | Coordinates    | 1399..1923(-)                                                   |          |
| 2558671153 | DRAFT_01821 | DNA_length     | 525bp                                                           |          |
| 2558671153 | DRAFT_01821 | Protein_length | 174aa                                                           |          |
| 2558671153 | DRAFT_01821 | GC             |                                                                 | 0.59     |
| 2558671154 | DRAFT_01822 | KEGG_module    | M00114: Ascorbate biosynthesis, plants, glucose-6P => ascorbate |          |
| 2558671154 | DRAFT_01822 | Metacyc        | PWY-882: L-ascorbate biosynthesis I (L-galactose pathway)       |          |
| 2558671154 | DRAFT_01822 | Metacyc        | PWY-5661: GDP-glucose biosynthesis                              |          |
| 2558671154 | DRAFT_01822 | Metacyc        | PWY-5940: streptomycin biosynthesis                             |          |
| 2558671154 | DRAFT_01822 | Metacyc        | PWY-621: sucrose degradation III                                |          |
| 2558671154 | DRAFT_01822 | Metacyc        | PWY-842: starch degradation I                                   |          |
| 2558671154 | DRAFT_01822 | Metacyc        | PWY-3801: sucrose degradation VI (anaerobic)                    |          |
| 2558671154 | DRAFT_01822 | Metacyc        | GLUCOSE1PMETAB-PWY: glucose and glucose-1-phosphate degradation |          |
| 2558671154 | DRAFT_01822 | Metacyc        | PWY-5384: sucrose degradation IV                                |          |
| 2558671154 | DRAFT_01822 | Metacyc        | PWY-6731: starch degradation III                                |          |
| 2558671154 | DRAFT_01822 | Metacyc        | PWY-5941: glycogen degradation II                               |          |
| 2558671154 | DRAFT_01822 | Metacyc        | SUCSYN-PWY: sucrose biosynthesis                                |          |
| 2558671154 | DRAFT_01822 | Metacyc        | GLYCOCAT-PWY: glycogen degradation I                            |          |
| 2558671154 | DRAFT_01822 | Metacyc        | PWY-622: starch biosynthesis                                    |          |
| 2558671154 | DRAFT_01822 | Metacyc        | PWY-6737: starch degradation V                                  |          |
| 2558671154 | DRAFT_01822 | Metacyc        | PWY-5659: GDP-mannose biosynthesis                              |          |
| 2558671154 | DRAFT_01822 | COG_category   | [G] Carbohydrate transport and metabolism                       |          |
| 2558671154 | DRAFT_01822 | COG1109        | Phosphomannomutase                                              | 6.00E-67 |
| 2558671154 | DRAFT_01822 | pfam02879      | PGM_PMM_II                                                      | 8.80E-13 |
| 2558671154 | DRAFT_01822 | pfam02880      | PGM_PMM_III                                                     | 1.20E-17 |
| 2558671154 | DRAFT_01822 | pfam00408      | PGM_PMM_IV                                                      | 8.50E-07 |

|            |             |                |                                                                 |          |
|------------|-------------|----------------|-----------------------------------------------------------------|----------|
| 2558671154 | DRAFT_01822 | pfam02878      | PGM_PMM_I                                                       | 8.70E-22 |
| 2558671154 | DRAFT_01822 | EC:5.4.2.2     | Phosphoglucomutase.                                             |          |
| 2558671154 | DRAFT_01822 | EC:5.4.2.8     | Phosphomannomutase.                                             |          |
| 2558671154 | DRAFT_01822 | KO:K15778      | phosphomannomutase / phosphoglucomutase [EC:5.4.2.8 5.4.2.2]    | 0.00E+00 |
| 2558671154 | DRAFT_01822 | Locus_type     | CDS                                                             |          |
| 2558671154 | DRAFT_01822 | Product_name   | Phosphomannomutase                                              |          |
| 2558671154 | DRAFT_01822 | Scaffold       | DRAFT_contig_70_1826_len_5843_read_count_86513.69               |          |
| 2558671154 | DRAFT_01822 | Coordinates    | 1991..3292(+)                                                   |          |
| 2558671154 | DRAFT_01822 | DNA_length     | 1302bp                                                          |          |
| 2558671154 | DRAFT_01822 | Protein_length | 433aa                                                           |          |
| 2558671154 | DRAFT_01822 | GC             |                                                                 | 0.6      |
|            |             |                |                                                                 |          |
| 2558671155 | DRAFT_01823 | KEGG_module    | M00127: Thiamine biosynthesis, AIR => thiamine-P/thiamine-2P    |          |
| 2558671155 | DRAFT_01823 | Metacyc        | PWY-6893: thiamin diphosphate biosynthesis II (Bacillus)        |          |
| 2558671155 | DRAFT_01823 | Metacyc        | PWY-6896: thiamin salvage I                                     |          |
| 2558671155 | DRAFT_01823 | Metacyc        | PWY-6894: thiamin diphosphate biosynthesis I (E. coli)          |          |
| 2558671155 | DRAFT_01823 | Metacyc        | PWY-6897: thiamin salvage II                                    |          |
| 2558671155 | DRAFT_01823 | COG_category   | [H] Coenzyme transport and metabolism                           |          |
| 2558671155 | DRAFT_01823 | COG0611        | Thiamine monophosphate kinase                                   | 3.00E-55 |
| 2558671155 | DRAFT_01823 | pfam02769      | AIRS_C                                                          | 3.20E-06 |
| 2558671155 | DRAFT_01823 | pfam00586      | AIRS                                                            | 2.30E-13 |
| 2558671155 | DRAFT_01823 | EC:2.7.4.16    | Thiamine-phosphate kinase.                                      |          |
| 2558671155 | DRAFT_01823 | TIGR01379      | thiamine-monophosphate kinase                                   | 4.00E-72 |
| 2558671155 | DRAFT_01823 | KO:K00946      | thiamine-monophosphate kinase [EC:2.7.4.16]                     | 0.00E+00 |
| 2558671155 | DRAFT_01823 | Locus_type     | CDS                                                             |          |
| 2558671155 | DRAFT_01823 | Product_name   | thiamine-monophosphate kinase                                   |          |
| 2558671155 | DRAFT_01823 | Scaffold       | DRAFT_contig_70_1826_len_5843_read_count_86513.69               |          |
| 2558671155 | DRAFT_01823 | Coordinates    | 3345..4253(+)                                                   |          |
| 2558671155 | DRAFT_01823 | DNA_length     | 909bp                                                           |          |
| 2558671155 | DRAFT_01823 | Protein_length | 302aa                                                           |          |
| 2558671155 | DRAFT_01823 | GC             |                                                                 | 0.58     |
|            |             |                |                                                                 |          |
| 2558671156 | DRAFT_01824 | KEGG_module    | M00114: Ascorbate biosynthesis, plants, glucose-6P => ascorbate |          |
| 2558671156 | DRAFT_01824 | Metacyc        | PWY-622: starch biosynthesis                                    |          |

|            |             |                |                                                                 |           |
|------------|-------------|----------------|-----------------------------------------------------------------|-----------|
| 2558671156 | DRAFT_01824 | Metacyc        | PWY-3801: sucrose degradation VI (anaerobic)                    |           |
| 2558671156 | DRAFT_01824 | Metacyc        | PWY-842: starch degradation I                                   |           |
| 2558671156 | DRAFT_01824 | Metacyc        | PWY-5661: GDP-glucose biosynthesis                              |           |
| 2558671156 | DRAFT_01824 | Metacyc        | PWY-5941: glycogen degradation II                               |           |
| 2558671156 | DRAFT_01824 | Metacyc        | PWY-882: L-ascorbate biosynthesis I (L-galactose pathway)       |           |
| 2558671156 | DRAFT_01824 | Metacyc        | SUCSYN-PWY: sucrose biosynthesis                                |           |
| 2558671156 | DRAFT_01824 | Metacyc        | GLUCOSE1PMETAB-PWY: glucose and glucose-1-phosphate degradation |           |
| 2558671156 | DRAFT_01824 | Metacyc        | PWY-621: sucrose degradation III                                |           |
| 2558671156 | DRAFT_01824 | Metacyc        | PWY-6731: starch degradation III                                |           |
| 2558671156 | DRAFT_01824 | Metacyc        | PWY-5940: streptomycin biosynthesis                             |           |
| 2558671156 | DRAFT_01824 | Metacyc        | PWY-5384: sucrose degradation IV                                |           |
| 2558671156 | DRAFT_01824 | Metacyc        | PWY-6737: starch degradation V                                  |           |
| 2558671156 | DRAFT_01824 | Metacyc        | GLYCOCAT-PWY: glycogen degradation I                            |           |
| 2558671156 | DRAFT_01824 | Metacyc        | PWY-5659: GDP-mannose biosynthesis                              |           |
| 2558671156 | DRAFT_01824 | COG_category   | [G] Carbohydrate transport and metabolism                       |           |
| 2558671156 | DRAFT_01824 | COG1109        | Phosphomannomutase                                              | 1.00E-110 |
| 2558671156 | DRAFT_01824 | pfam02878      | PGM_PMM_I                                                       | 3.30E-37  |
| 2558671156 | DRAFT_01824 | pfam02880      | PGM_PMM_III                                                     | 4.00E-20  |
| 2558671156 | DRAFT_01824 | pfam00408      | PGM_PMM_IV                                                      | 3.60E-10  |
| 2558671156 | DRAFT_01824 | pfam02879      | PGM_PMM_II                                                      | 8.40E-24  |
| 2558671156 | DRAFT_01824 | EC:5.4.2.2     | Phosphoglucomutase.                                             |           |
| 2558671156 | DRAFT_01824 | EC:5.4.2.8     | Phosphomannomutase.                                             |           |
| 2558671156 | DRAFT_01824 | TIGR03990      | phosphoglucosamine mutase                                       | 0.00E+00  |
| 2558671156 | DRAFT_01824 | KO:K15778      | phosphomannomutase / phosphoglucomutase [EC:5.4.2.8 5.4.2.2]    | 0.00E+00  |
| 2558671156 | DRAFT_01824 | Locus_type     | CDS                                                             |           |
| 2558671156 | DRAFT_01824 | Product_name   | phosphoglucosamine mutase                                       |           |
| 2558671156 | DRAFT_01824 | Scaffold       | DRAFT_contig_70_1826_len_5843_read_count_86513.69               |           |
| 2558671156 | DRAFT_01824 | Coordinates    | 4245..5612(-)                                                   |           |
| 2558671156 | DRAFT_01824 | DNA_length     | 1368bp                                                          |           |
| 2558671156 | DRAFT_01824 | Protein_length | 455aa                                                           |           |
| 2558671156 | DRAFT_01824 | GC             |                                                                 | 0.6       |
| 2558671157 | DRAFT_01825 | Locus_type     | tRNA                                                            |           |
| 2558671157 | DRAFT_01825 | Product_name   | tRNA_Ser_CGA                                                    |           |

|            |             |                |      |                                                    |          |
|------------|-------------|----------------|------|----------------------------------------------------|----------|
| 2558671157 | DRAFT_01825 | Scaffold       |      | DRAFT_contig_70_1826_len_5843_read_count_86513.69  |          |
| 2558671157 | DRAFT_01825 | Coordinates    |      | 5728..5840(+)                                      |          |
| 2558671157 | DRAFT_01825 | DNA_length     |      | 71bp                                               |          |
| 2558671157 | DRAFT_01825 | GC             |      |                                                    | 0.66     |
|            |             |                |      |                                                    |          |
| 2558671158 | DRAFT_01826 | Locus_type     |      | CDS                                                |          |
| 2558671158 | DRAFT_01826 | Product_name   |      | hypothetical protein                               |          |
| 2558671158 | DRAFT_01826 | Scaffold       |      | DRAFT_contig_70_2034_len_5512_read_count_100863.70 |          |
| 2558671158 | DRAFT_01826 | Coordinates    |      | 84..842(+)                                         |          |
| 2558671158 | DRAFT_01826 | DNA_length     |      | 759bp                                              |          |
| 2558671158 | DRAFT_01826 | Protein_length |      | 252aa                                              |          |
| 2558671158 | DRAFT_01826 | GC             |      |                                                    | 0.54     |
|            |             |                |      |                                                    |          |
| 2558671159 | DRAFT_01827 | Locus_type     |      | CDS                                                |          |
| 2558671159 | DRAFT_01827 | Product_name   |      | hypothetical protein                               |          |
| 2558671159 | DRAFT_01827 | Scaffold       |      | DRAFT_contig_70_2034_len_5512_read_count_100863.70 |          |
| 2558671159 | DRAFT_01827 | Coordinates    |      | 888..1232(+)                                       |          |
| 2558671159 | DRAFT_01827 | DNA_length     |      | 345bp                                              |          |
| 2558671159 | DRAFT_01827 | Protein_length |      | 114aa                                              |          |
| 2558671159 | DRAFT_01827 | GC             |      |                                                    | 0.58     |
|            |             |                |      |                                                    |          |
| 2558671160 | DRAFT_01828 | Locus_type     |      | CDS                                                |          |
| 2558671160 | DRAFT_01828 | Product_name   |      | hypothetical protein                               |          |
| 2558671160 | DRAFT_01828 | Scaffold       |      | DRAFT_contig_70_2034_len_5512_read_count_100863.70 |          |
| 2558671160 | DRAFT_01828 | Coordinates    |      | 1150..1434(-)                                      |          |
| 2558671160 | DRAFT_01828 | DNA_length     |      | 285bp                                              |          |
| 2558671160 | DRAFT_01828 | Protein_length |      | 94aa                                               |          |
| 2558671160 | DRAFT_01828 | GC             |      |                                                    | 0.57     |
| 2558671160 | DRAFT_01828 | Transmembrane  |      | Yes                                                |          |
|            |             |                |      |                                                    |          |
| 2558671161 | DRAFT_01829 | pfam00782      | DSPc |                                                    | 7.70E-15 |
| 2558671161 | DRAFT_01829 | Locus_type     |      | CDS                                                |          |
| 2558671161 | DRAFT_01829 | Product_name   |      | Predicted protein-tyrosine phosphatase             |          |
| 2558671161 | DRAFT_01829 | Scaffold       |      | DRAFT_contig_70_2034_len_5512_read_count_100863.70 |          |

|            |             |                |                 |                                                                          |          |
|------------|-------------|----------------|-----------------|--------------------------------------------------------------------------|----------|
| 2558671161 | DRAFT_01829 | Coordinates    |                 | 1447..1851(-)                                                            |          |
| 2558671161 | DRAFT_01829 | DNA_length     |                 | 405bp                                                                    |          |
| 2558671161 | DRAFT_01829 | Protein_length |                 | 134aa                                                                    |          |
| 2558671161 | DRAFT_01829 | GC             |                 |                                                                          | 0.52     |
| 2558671162 | DRAFT_01830 | pfam13527      | Acetyltransf_9  |                                                                          | 1.80E-16 |
| 2558671162 | DRAFT_01830 | Locus_type     |                 | CDS                                                                      |          |
| 2558671162 | DRAFT_01830 | Product_name   |                 | Predicted acetyltransferase involved in intracellular survival and relat |          |
| 2558671162 | DRAFT_01830 | Scaffold       |                 | DRAFT_contig_70_2034_len_5512_read_count_100863.70                       |          |
| 2558671162 | DRAFT_01830 | Coordinates    |                 | 2011..2949(-)                                                            |          |
| 2558671162 | DRAFT_01830 | DNA_length     |                 | 939bp                                                                    |          |
| 2558671162 | DRAFT_01830 | Protein_length |                 | 312aa                                                                    |          |
| 2558671162 | DRAFT_01830 | GC             |                 |                                                                          | 0.51     |
| 2558671163 | DRAFT_01831 | pfam12847      | Methyltransf_18 |                                                                          | 2.30E-13 |
| 2558671163 | DRAFT_01831 | Locus_type     |                 | CDS                                                                      |          |
| 2558671163 | DRAFT_01831 | Product_name   |                 | Methylase involved in ubiquinone/menaquinone biosynthesis                |          |
| 2558671163 | DRAFT_01831 | Scaffold       |                 | DRAFT_contig_70_2034_len_5512_read_count_100863.70                       |          |
| 2558671163 | DRAFT_01831 | Coordinates    |                 | 3133..3951(-)                                                            |          |
| 2558671163 | DRAFT_01831 | DNA_length     |                 | 819bp                                                                    |          |
| 2558671163 | DRAFT_01831 | Protein_length |                 | 272aa                                                                    |          |
| 2558671163 | DRAFT_01831 | GC             |                 |                                                                          | 0.5      |
| 2558671164 | DRAFT_01832 | Locus_type     |                 | CDS                                                                      |          |
| 2558671164 | DRAFT_01832 | Product_name   |                 | hypothetical protein                                                     |          |
| 2558671164 | DRAFT_01832 | Scaffold       |                 | DRAFT_contig_70_2034_len_5512_read_count_100863.70                       |          |
| 2558671164 | DRAFT_01832 | Coordinates    |                 | 4230..5279(+)                                                            |          |
| 2558671164 | DRAFT_01832 | DNA_length     |                 | 1050bp                                                                   |          |
| 2558671164 | DRAFT_01832 | Protein_length |                 | 349aa                                                                    |          |
| 2558671164 | DRAFT_01832 | GC             |                 |                                                                          | 0.53     |
| 2558671165 | DRAFT_01833 | Locus_type     |                 | tRNA                                                                     |          |
| 2558671165 | DRAFT_01833 | Product_name   |                 | tRNA_Leu_CAG                                                             |          |
| 2558671165 | DRAFT_01833 | Scaffold       |                 | DRAFT_contig_70_2125_len_5392_read_count_101811.71                       |          |

|            |             |                |                                                                   |          |
|------------|-------------|----------------|-------------------------------------------------------------------|----------|
| 2558671165 | DRAFT_01833 | Coordinates    | 17..101(+)                                                        |          |
| 2558671165 | DRAFT_01833 | DNA_length     | 85bp                                                              |          |
| 2558671165 | DRAFT_01833 | GC             |                                                                   | 0.72     |
| 2558671166 | DRAFT_01834 | KEGG_module    | M00248: Putative antibiotic transport system                      |          |
| 2558671166 | DRAFT_01834 | COG_category   | [V] Defense mechanisms                                            |          |
| 2558671166 | DRAFT_01834 | COG1131        | ABC-type multidrug transport system, ATPase component             | 6.00E-57 |
| 2558671166 | DRAFT_01834 | pfam00005      | ABC_tran                                                          | 1.60E-25 |
| 2558671166 | DRAFT_01834 | KO:K09687      | antibiotic transport system ATP-binding protein                   | 0.00E+00 |
| 2558671166 | DRAFT_01834 | Locus_type     | CDS                                                               |          |
| 2558671166 | DRAFT_01834 | Product_name   | ABC-type multidrug transport system, ATPase component             |          |
| 2558671166 | DRAFT_01834 | Scaffold       | DRAFT_contig_70_2125_len_5392_read_count_101811.71                |          |
| 2558671166 | DRAFT_01834 | Coordinates    | 306..1259(+)                                                      |          |
| 2558671166 | DRAFT_01834 | DNA_length     | 954bp                                                             |          |
| 2558671166 | DRAFT_01834 | Protein_length | 317aa                                                             |          |
| 2558671166 | DRAFT_01834 | GC             |                                                                   | 0.58     |
| 2558671167 | DRAFT_01835 | KEGG_module    | M00248: Putative antibiotic transport system                      |          |
| 2558671167 | DRAFT_01835 | COG_category   | [M] Cell wall/membrane/envelope biogenesis                        |          |
| 2558671167 | DRAFT_01835 | COG_category   | [G] Carbohydrate transport and metabolism                         |          |
| 2558671167 | DRAFT_01835 | COG1682        | ABC-type polysaccharide/polyol phosphate export systems, permease | 2.00E-06 |
| 2558671167 | DRAFT_01835 | pfam01061      | ABC2_membrane                                                     | 7.60E-08 |
| 2558671167 | DRAFT_01835 | KO:K09686      | antibiotic transport system permease protein                      | 1.10E-10 |
| 2558671167 | DRAFT_01835 | Locus_type     | CDS                                                               |          |
| 2558671167 | DRAFT_01835 | Product_name   | ABC-type polysaccharide/polyol phosphate export systems, permease |          |
| 2558671167 | DRAFT_01835 | Scaffold       | DRAFT_contig_70_2125_len_5392_read_count_101811.71                |          |
| 2558671167 | DRAFT_01835 | Coordinates    | 1252..2013(+)                                                     |          |
| 2558671167 | DRAFT_01835 | DNA_length     | 762bp                                                             |          |
| 2558671167 | DRAFT_01835 | Protein_length | 253aa                                                             |          |
| 2558671167 | DRAFT_01835 | GC             |                                                                   | 0.54     |
| 2558671167 | DRAFT_01835 | Transmembrane  | Yes                                                               |          |
| 2558671168 | DRAFT_01836 | pfam01061      | ABC2_membrane                                                     | 3.90E-06 |
| 2558671168 | DRAFT_01836 | Locus_type     | CDS                                                               |          |

|            |             |                |                                                                   |          |
|------------|-------------|----------------|-------------------------------------------------------------------|----------|
| 2558671168 | DRAFT_01836 | Product_name   | ABC-type polysaccharide/polyol phosphate export systems, permease |          |
| 2558671168 | DRAFT_01836 | Scaffold       | DRAFT_contig_70_2125_len_5392_read_count_101811.71                |          |
| 2558671168 | DRAFT_01836 | Coordinates    | 2010..2801(+)                                                     |          |
| 2558671168 | DRAFT_01836 | DNA_length     | 792bp                                                             |          |
| 2558671168 | DRAFT_01836 | Protein_length | 263aa                                                             |          |
| 2558671168 | DRAFT_01836 | GC             |                                                                   | 0.56     |
| 2558671168 | DRAFT_01836 | Transmembrane  | Yes                                                               |          |
|            |             |                |                                                                   |          |
| 2558671169 | DRAFT_01837 | Locus_type     | CDS                                                               |          |
| 2558671169 | DRAFT_01837 | Product_name   | hypothetical protein                                              |          |
| 2558671169 | DRAFT_01837 | Scaffold       | DRAFT_contig_70_2125_len_5392_read_count_101811.71                |          |
| 2558671169 | DRAFT_01837 | Coordinates    | 2820..3194(-)                                                     |          |
| 2558671169 | DRAFT_01837 | DNA_length     | 375bp                                                             |          |
| 2558671169 | DRAFT_01837 | Protein_length | 124aa                                                             |          |
| 2558671169 | DRAFT_01837 | GC             |                                                                   | 0.58     |
|            |             |                |                                                                   |          |
| 2558671170 | DRAFT_01838 | Locus_type     | CDS                                                               |          |
| 2558671170 | DRAFT_01838 | Product_name   | hypothetical protein                                              |          |
| 2558671170 | DRAFT_01838 | Scaffold       | DRAFT_contig_70_2125_len_5392_read_count_101811.71                |          |
| 2558671170 | DRAFT_01838 | Coordinates    | 3326..3592(+)                                                     |          |
| 2558671170 | DRAFT_01838 | DNA_length     | 267bp                                                             |          |
| 2558671170 | DRAFT_01838 | Protein_length | 88aa                                                              |          |
| 2558671170 | DRAFT_01838 | GC             |                                                                   | 0.54     |
|            |             |                |                                                                   |          |
| 2558671171 | DRAFT_01839 | Locus_type     | CDS                                                               |          |
| 2558671171 | DRAFT_01839 | Product_name   | hypothetical protein                                              |          |
| 2558671171 | DRAFT_01839 | Scaffold       | DRAFT_contig_70_2125_len_5392_read_count_101811.71                |          |
| 2558671171 | DRAFT_01839 | Coordinates    | 3595..4020(-)                                                     |          |
| 2558671171 | DRAFT_01839 | DNA_length     | 426bp                                                             |          |
| 2558671171 | DRAFT_01839 | Protein_length | 141aa                                                             |          |
| 2558671171 | DRAFT_01839 | GC             |                                                                   | 0.54     |
|            |             |                |                                                                   |          |
| 2558671172 | DRAFT_01840 | COG_category   | [S] Function unknown                                              |          |
| 2558671172 | DRAFT_01840 | COG1698        | Uncharacterized protein conserved in archaea                      | 7.00E-17 |



|            |             |                |                                                                  |                                                    |          |
|------------|-------------|----------------|------------------------------------------------------------------|----------------------------------------------------|----------|
| 2558671172 | DRAFT_01840 | pfam03685      | UPF0147                                                          |                                                    | 2.40E-29 |
| 2558671172 | DRAFT_01840 | Locus_type     |                                                                  | CDS                                                |          |
| 2558671172 | DRAFT_01840 | Product_name   |                                                                  | Uncharacterized protein conserved in archaea       |          |
| 2558671172 | DRAFT_01840 | Scaffold       |                                                                  | DRAFT_contig_70_2125_len_5392_read_count_101811.71 |          |
| 2558671172 | DRAFT_01840 | Coordinates    |                                                                  | 4055..4435(-)                                      |          |
| 2558671172 | DRAFT_01840 | DNA_length     |                                                                  | 381bp                                              |          |
| 2558671172 | DRAFT_01840 | Protein_length |                                                                  | 126aa                                              |          |
| 2558671172 | DRAFT_01840 | GC             |                                                                  |                                                    | 0.53     |
| 2558671173 | DRAFT_01841 | COG_category   | [R] General function prediction only                             |                                                    |          |
| 2558671173 | DRAFT_01841 | COG1645        | Uncharacterized Zn-finger containing protein                     |                                                    | 1.00E-06 |
| 2558671173 | DRAFT_01841 | pfam06677      | Auto_anti-p27                                                    |                                                    | 3.70E-09 |
| 2558671173 | DRAFT_01841 | Locus_type     |                                                                  | CDS                                                |          |
| 2558671173 | DRAFT_01841 | Product_name   |                                                                  | Uncharacterized Zn-finger containing protein       |          |
| 2558671173 | DRAFT_01841 | Scaffold       |                                                                  | DRAFT_contig_70_2125_len_5392_read_count_101811.71 |          |
| 2558671173 | DRAFT_01841 | Coordinates    |                                                                  | 4537..4884(+)                                      |          |
| 2558671173 | DRAFT_01841 | DNA_length     |                                                                  | 348bp                                              |          |
| 2558671173 | DRAFT_01841 | Protein_length |                                                                  | 115aa                                              |          |
| 2558671173 | DRAFT_01841 | GC             |                                                                  |                                                    | 0.53     |
| 2558671174 | DRAFT_01842 | COG_category   | [O] Posttranslational modification, protein turnover, chaperones |                                                    |          |
| 2558671174 | DRAFT_01842 | COG1225        | Peroxiredoxin                                                    |                                                    | 2.00E-36 |
| 2558671174 | DRAFT_01842 | pfam00578      | AhpC-TSA                                                         |                                                    | 3.00E-34 |
| 2558671174 | DRAFT_01842 | Locus_type     |                                                                  | CDS                                                |          |
| 2558671174 | DRAFT_01842 | Product_name   |                                                                  | Peroxiredoxin                                      |          |
| 2558671174 | DRAFT_01842 | Scaffold       |                                                                  | DRAFT_contig_70_2125_len_5392_read_count_101811.71 |          |
| 2558671174 | DRAFT_01842 | Coordinates    |                                                                  | 4911..5390(+)                                      |          |
| 2558671174 | DRAFT_01842 | DNA_length     |                                                                  | 480bp                                              |          |
| 2558671174 | DRAFT_01842 | Protein_length |                                                                  | 159aa                                              |          |
| 2558671174 | DRAFT_01842 | GC             |                                                                  |                                                    | 0.55     |
| 2558671175 | DRAFT_01843 | pfam12846      | AAA_10                                                           |                                                    | 1.20E-06 |
| 2558671175 | DRAFT_01843 | Locus_type     |                                                                  | CDS                                                |          |
| 2558671175 | DRAFT_01843 | Product_name   |                                                                  | Predicted ATPase                                   |          |

|            |             |                |                                                                  |          |
|------------|-------------|----------------|------------------------------------------------------------------|----------|
| 2558671175 | DRAFT_01843 | Scaffold       | DRAFT_contig_70_2284_len_5201_read_count_82056.72                |          |
| 2558671175 | DRAFT_01843 | Coordinates    | 3..428(+)                                                        |          |
| 2558671175 | DRAFT_01843 | DNA_length     | 426bp                                                            |          |
| 2558671175 | DRAFT_01843 | Protein_length | 141aa                                                            |          |
| 2558671175 | DRAFT_01843 | GC             |                                                                  | 0.51     |
|            |             |                |                                                                  |          |
| 2558671176 | DRAFT_01844 | Locus_type     | CDS                                                              |          |
| 2558671176 | DRAFT_01844 | Product_name   | hypothetical protein                                             |          |
| 2558671176 | DRAFT_01844 | Scaffold       | DRAFT_contig_70_2284_len_5201_read_count_82056.72                |          |
| 2558671176 | DRAFT_01844 | Coordinates    | 539..724(-)                                                      |          |
| 2558671176 | DRAFT_01844 | DNA_length     | 186bp                                                            |          |
| 2558671176 | DRAFT_01844 | Protein_length | 61aa                                                             |          |
| 2558671176 | DRAFT_01844 | GC             |                                                                  | 0.56     |
|            |             |                |                                                                  |          |
| 2558671177 | DRAFT_01845 | COG_category   | [E] Amino acid transport and metabolism                          |          |
| 2558671177 | DRAFT_01845 | COG1506        | Dipeptidyl aminopeptidases/acylaminoacyl-peptidases              | 3.00E-63 |
| 2558671177 | DRAFT_01845 | pfam07676      | PD40                                                             | 1.40E-06 |
| 2558671177 | DRAFT_01845 | pfam00326      | Peptidase_S9                                                     | 1.90E-46 |
| 2558671177 | DRAFT_01845 | Locus_type     | CDS                                                              |          |
| 2558671177 | DRAFT_01845 | Product_name   | Dipeptidyl aminopeptidases/acylaminoacyl-peptidases              |          |
| 2558671177 | DRAFT_01845 | Scaffold       | DRAFT_contig_70_2284_len_5201_read_count_82056.72                |          |
| 2558671177 | DRAFT_01845 | Coordinates    | 742..2739(+)                                                     |          |
| 2558671177 | DRAFT_01845 | DNA_length     | 1998bp                                                           |          |
| 2558671177 | DRAFT_01845 | Protein_length | 665aa                                                            |          |
| 2558671177 | DRAFT_01845 | GC             |                                                                  | 0.61     |
|            |             |                |                                                                  |          |
| 2558671178 | DRAFT_01846 | COG_category   | [J] Translation, ribosomal structure and biogenesis              |          |
| 2558671178 | DRAFT_01846 | COG1670        | Acetyltransferases, including N-acetylases of ribosomal proteins | 2.00E-19 |
| 2558671178 | DRAFT_01846 | pfam13302      | Acetyltransf_3                                                   | 3.10E-24 |
| 2558671178 | DRAFT_01846 | Locus_type     | CDS                                                              |          |
| 2558671178 | DRAFT_01846 | Product_name   | Acetyltransferases, including N-acetylases of ribosomal proteins |          |
| 2558671178 | DRAFT_01846 | Scaffold       | DRAFT_contig_70_2284_len_5201_read_count_82056.72                |          |
| 2558671178 | DRAFT_01846 | Coordinates    | 2755..3294(-)                                                    |          |
| 2558671178 | DRAFT_01846 | DNA_length     | 540bp                                                            |          |

|            |             |                |                                                   |          |
|------------|-------------|----------------|---------------------------------------------------|----------|
| 2558671178 | DRAFT_01846 | Protein_length | 179aa                                             |          |
| 2558671178 | DRAFT_01846 | GC             |                                                   | 0.52     |
| 2558671179 | DRAFT_01847 | COG_category   | [E] Amino acid transport and metabolism           |          |
| 2558671179 | DRAFT_01847 | COG0346        | Lactoylglutathione lyase and related lyases       | 1.00E-03 |
| 2558671179 | DRAFT_01847 | pfam12681      | Glyoxalase_2                                      | 3.70E-14 |
| 2558671179 | DRAFT_01847 | Locus_type     | CDS                                               |          |
| 2558671179 | DRAFT_01847 | Product_name   | Lactoylglutathione lyase and related lyases       |          |
| 2558671179 | DRAFT_01847 | Scaffold       | DRAFT_contig_70_2284_len_5201_read_count_82056.72 |          |
| 2558671179 | DRAFT_01847 | Coordinates    | 3450..3794(+)                                     |          |
| 2558671179 | DRAFT_01847 | DNA_length     | 345bp                                             |          |
| 2558671179 | DRAFT_01847 | Protein_length | 114aa                                             |          |
| 2558671179 | DRAFT_01847 | GC             |                                                   | 0.5      |
| 2558671180 | DRAFT_01848 | Locus_type     | CDS                                               |          |
| 2558671180 | DRAFT_01848 | Product_name   | hypothetical protein                              |          |
| 2558671180 | DRAFT_01848 | Scaffold       | DRAFT_contig_70_2284_len_5201_read_count_82056.72 |          |
| 2558671180 | DRAFT_01848 | Coordinates    | 4037..4894(+)                                     |          |
| 2558671180 | DRAFT_01848 | DNA_length     | 858bp                                             |          |
| 2558671180 | DRAFT_01848 | Protein_length | 285aa                                             |          |
| 2558671180 | DRAFT_01848 | GC             |                                                   | 0.6      |
| 2558671181 | DRAFT_01849 | Locus_type     | CDS                                               |          |
| 2558671181 | DRAFT_01849 | Product_name   | hypothetical protein                              |          |
| 2558671181 | DRAFT_01849 | Scaffold       | DRAFT_contig_70_2284_len_5201_read_count_82056.72 |          |
| 2558671181 | DRAFT_01849 | Coordinates    | 4954..5199(-)                                     |          |
| 2558671181 | DRAFT_01849 | DNA_length     | 246bp                                             |          |
| 2558671181 | DRAFT_01849 | Protein_length | 81aa                                              |          |
| 2558671181 | DRAFT_01849 | GC             |                                                   | 0.57     |
| 2558671182 | DRAFT_01850 | COG_category   | [L] Replication, recombination and repair         |          |
| 2558671182 | DRAFT_01850 | COG1041        | Predicted DNA modification methylase              | 4.00E-35 |
| 2558671182 | DRAFT_01850 | pfam01170      | UPF0020                                           | 5.10E-24 |
| 2558671182 | DRAFT_01850 | EC:2.1.1.213   | tRNA (guanine(10)-N(2))-dimethyltransferase.      |          |

|            |             |                |                                                          |          |
|------------|-------------|----------------|----------------------------------------------------------|----------|
| 2558671182 | DRAFT_01850 | TIGR01177      | TIGR01177 family protein                                 | 4.40E-57 |
| 2558671182 | DRAFT_01850 | KO:K07446      | tRNA (guanine10-N2)-dimethyltransferase [EC:2.1.1.213]   | 3.00E-29 |
| 2558671182 | DRAFT_01850 | ITERM:05594    | N2-methylguanosine tRNA methyltransferase (EC 2.1.1.213) |          |
| 2558671182 | DRAFT_01850 | Locus_type     | CDS                                                      |          |
| 2558671182 | DRAFT_01850 | Product_name   | N2-methylguanosine tRNA methyltransferase (EC 2.1.1.213) |          |
| 2558671182 | DRAFT_01850 | Scaffold       | DRAFT_contig_70_2438_len_5030_read_count_74374.73        |          |
| 2558671182 | DRAFT_01850 | Coordinates    | 2..949(-)                                                |          |
| 2558671182 | DRAFT_01850 | DNA_length     | 948bp                                                    |          |
| 2558671182 | DRAFT_01850 | Protein_length | 316aa                                                    |          |
| 2558671182 | DRAFT_01850 | GC             |                                                          | 0.6      |
| 2558671183 | DRAFT_01851 | KEGG_module    | M00005: PRPP biosynthesis, ribose 5P => PRPP             |          |
| 2558671183 | DRAFT_01851 | Metacyc        | PWY0-662: PRPP biosynthesis I                            |          |
| 2558671183 | DRAFT_01851 | COG_category   | [F] Nucleotide transport and metabolism                  |          |
| 2558671183 | DRAFT_01851 | COG_category   | [E] Amino acid transport and metabolism                  |          |
| 2558671183 | DRAFT_01851 | COG0462        | Phosphoribosylpyrophosphate synthetase                   | 4.00E-74 |
| 2558671183 | DRAFT_01851 | pfam13793      | Pribosyltran_N                                           | 1.30E-24 |
| 2558671183 | DRAFT_01851 | pfam14572      | Pribosyl_synth                                           | 5.00E-13 |
| 2558671183 | DRAFT_01851 | EC:2.7.6.1     | Ribose-phosphate diphosphokinase.                        |          |
| 2558671183 | DRAFT_01851 | TIGR01251      | ribose-phosphate pyrophosphokinase                       | 1.50E-88 |
| 2558671183 | DRAFT_01851 | KO:K00948      | ribose-phosphate pyrophosphokinase [EC:2.7.6.1]          | 0.00E+00 |
| 2558671183 | DRAFT_01851 | Locus_type     | CDS                                                      |          |
| 2558671183 | DRAFT_01851 | Product_name   | Phosphoribosylpyrophosphate synthetase                   |          |
| 2558671183 | DRAFT_01851 | Scaffold       | DRAFT_contig_70_2438_len_5030_read_count_74374.73        |          |
| 2558671183 | DRAFT_01851 | Coordinates    | 942..1832(-)                                             |          |
| 2558671183 | DRAFT_01851 | DNA_length     | 891bp                                                    |          |
| 2558671183 | DRAFT_01851 | Protein_length | 296aa                                                    |          |
| 2558671183 | DRAFT_01851 | GC             |                                                          | 0.59     |
| 2558671184 | DRAFT_01852 | Locus_type     | CDS                                                      |          |
| 2558671184 | DRAFT_01852 | Product_name   | hypothetical protein                                     |          |
| 2558671184 | DRAFT_01852 | Scaffold       | DRAFT_contig_70_2438_len_5030_read_count_74374.73        |          |
| 2558671184 | DRAFT_01852 | Coordinates    | 1947..2165(+)                                            |          |
| 2558671184 | DRAFT_01852 | DNA_length     | 219bp                                                    |          |

|            |             |                |                                                   |          |
|------------|-------------|----------------|---------------------------------------------------|----------|
| 2558671184 | DRAFT_01852 | Protein_length | 72aa                                              |          |
| 2558671184 | DRAFT_01852 | GC             |                                                   | 0.53     |
| 2558671185 | DRAFT_01853 | COG_category   | [F] Nucleotide transport and metabolism           |          |
| 2558671185 | DRAFT_01853 | COG1051        | ADP-ribose pyrophosphatase                        | 5.00E-18 |
| 2558671185 | DRAFT_01853 | pfam00293      | NUDIX                                             | 4.00E-22 |
| 2558671185 | DRAFT_01853 | Locus_type     | CDS                                               |          |
| 2558671185 | DRAFT_01853 | Product_name   | ADP-ribose pyrophosphatase                        |          |
| 2558671185 | DRAFT_01853 | Scaffold       | DRAFT_contig_70_2438_len_5030_read_count_74374.73 |          |
| 2558671185 | DRAFT_01853 | Coordinates    | 2200..2667(-)                                     |          |
| 2558671185 | DRAFT_01853 | DNA_length     | 468bp                                             |          |
| 2558671185 | DRAFT_01853 | Protein_length | 155aa                                             |          |
| 2558671185 | DRAFT_01853 | GC             |                                                   | 0.62     |
| 2558671186 | DRAFT_01854 | COG_category   | [G] Carbohydrate transport and metabolism         |          |
| 2558671186 | DRAFT_01854 | COG2814        | Arabinose efflux permease                         | 9.00E-05 |
| 2558671186 | DRAFT_01854 | pfam05977      | MFS_3                                             | 3.70E-19 |
| 2558671186 | DRAFT_01854 | Locus_type     | CDS                                               |          |
| 2558671186 | DRAFT_01854 | Product_name   | Arabinose efflux permease                         |          |
| 2558671186 | DRAFT_01854 | Scaffold       | DRAFT_contig_70_2438_len_5030_read_count_74374.73 |          |
| 2558671186 | DRAFT_01854 | Coordinates    | 2973..4256(-)                                     |          |
| 2558671186 | DRAFT_01854 | DNA_length     | 1284bp                                            |          |
| 2558671186 | DRAFT_01854 | Protein_length | 427aa                                             |          |
| 2558671186 | DRAFT_01854 | GC             |                                                   | 0.56     |
| 2558671186 | DRAFT_01854 | Transmembrane  | Yes                                               |          |
| 2558671187 | DRAFT_01855 | TIGR02276      | 40-residue YVTN family beta-propeller repeat      | 3.00E-17 |
| 2558671187 | DRAFT_01855 | Locus_type     | CDS                                               |          |
| 2558671187 | DRAFT_01855 | Product_name   | 40-residue YVTN family beta-propeller repeat      |          |
| 2558671187 | DRAFT_01855 | Scaffold       | DRAFT_contig_70_2438_len_5030_read_count_74374.73 |          |
| 2558671187 | DRAFT_01855 | Coordinates    | 4586..5029(+)                                     |          |
| 2558671187 | DRAFT_01855 | DNA_length     | 444bp                                             |          |
| 2558671187 | DRAFT_01855 | Protein_length | 148aa                                             |          |
| 2558671187 | DRAFT_01855 | GC             |                                                   | 0.57     |

|            |             |                |                                                       |          |
|------------|-------------|----------------|-------------------------------------------------------|----------|
| 2558671187 | DRAFT_01855 | Transmembrane  | Yes                                                   |          |
| 2558671188 | DRAFT_01856 | Locus_type     | CDS                                                   |          |
| 2558671188 | DRAFT_01856 | Product_name   | hypothetical protein                                  |          |
| 2558671188 | DRAFT_01856 | Scaffold       | DRAFT_contig_70_2485_len_4972_read_count_79074.74     |          |
| 2558671188 | DRAFT_01856 | Coordinates    | 3..989(-)                                             |          |
| 2558671188 | DRAFT_01856 | DNA_length     | 987bp                                                 |          |
| 2558671188 | DRAFT_01856 | Protein_length | 329aa                                                 |          |
| 2558671188 | DRAFT_01856 | GC             |                                                       | 0.56     |
| 2558671189 | DRAFT_01857 | Locus_type     | CDS                                                   |          |
| 2558671189 | DRAFT_01857 | Product_name   | hypothetical protein                                  |          |
| 2558671189 | DRAFT_01857 | Scaffold       | DRAFT_contig_70_2485_len_4972_read_count_79074.74     |          |
| 2558671189 | DRAFT_01857 | Coordinates    | 1372..2709(-)                                         |          |
| 2558671189 | DRAFT_01857 | DNA_length     | 1338bp                                                |          |
| 2558671189 | DRAFT_01857 | Protein_length | 445aa                                                 |          |
| 2558671189 | DRAFT_01857 | GC             |                                                       | 0.6      |
| 2558671189 | DRAFT_01857 | Transmembrane  | Yes                                                   |          |
| 2558671190 | DRAFT_01858 | KEGG_module    | M00254: ABC-2 type transport system                   |          |
| 2558671190 | DRAFT_01858 | COG_category   | [V] Defense mechanisms                                |          |
| 2558671190 | DRAFT_01858 | COG1131        | ABC-type multidrug transport system, ATPase component | 2.00E-52 |
| 2558671190 | DRAFT_01858 | pfam00005      | ABC_tran                                              | 4.30E-27 |
| 2558671190 | DRAFT_01858 | KO:K01990      | ABC-2 type transport system ATP-binding protein       | 0.00E+00 |
| 2558671190 | DRAFT_01858 | Locus_type     | CDS                                                   |          |
| 2558671190 | DRAFT_01858 | Product_name   | ABC-type multidrug transport system, ATPase component |          |
| 2558671190 | DRAFT_01858 | Scaffold       | DRAFT_contig_70_2485_len_4972_read_count_79074.74     |          |
| 2558671190 | DRAFT_01858 | Coordinates    | 2771..3583(-)                                         |          |
| 2558671190 | DRAFT_01858 | DNA_length     | 813bp                                                 |          |
| 2558671190 | DRAFT_01858 | Protein_length | 270aa                                                 |          |
| 2558671190 | DRAFT_01858 | GC             |                                                       | 0.58     |
| 2558671191 | DRAFT_01859 | COG_category   | [G] Carbohydrate transport and metabolism             |          |
| 2558671191 | DRAFT_01859 | COG2211        | Na+/melibiose symporter and related transporters      | 4.00E-08 |

|            |             |                |                                                                  |                                                   |           |
|------------|-------------|----------------|------------------------------------------------------------------|---------------------------------------------------|-----------|
| 2558671191 | DRAFT_01859 | pfam07690      | MFS_1                                                            |                                                   | 6.20E-24  |
| 2558671191 | DRAFT_01859 | Locus_type     |                                                                  | CDS                                               |           |
| 2558671191 | DRAFT_01859 | Product_name   |                                                                  | Major Facilitator Superfamily                     |           |
| 2558671191 | DRAFT_01859 | Scaffold       |                                                                  | DRAFT_contig_70_2485_len_4972_read_count_79074.74 |           |
| 2558671191 | DRAFT_01859 | Coordinates    |                                                                  | 3907..4971(+)                                     |           |
| 2558671191 | DRAFT_01859 | DNA_length     |                                                                  | 1065bp                                            |           |
| 2558671191 | DRAFT_01859 | Protein_length |                                                                  | 355aa                                             |           |
| 2558671191 | DRAFT_01859 | GC             |                                                                  |                                                   | 0.58      |
| 2558671191 | DRAFT_01859 | Transmembrane  |                                                                  | Yes                                               |           |
| 2558671192 | DRAFT_01860 | COG_category   | [R] General function prediction only                             |                                                   |           |
| 2558671192 | DRAFT_01860 | COG1234        | Metal-dependent hydrolases of the beta-lactamase superfamily III |                                                   | 1.00E-73  |
| 2558671192 | DRAFT_01860 | pfam12706      | Lactamase_B_2                                                    |                                                   | 2.70E-29  |
| 2558671192 | DRAFT_01860 | EC:3.1.26.11   | Ribonuclease Z.                                                  |                                                   |           |
| 2558671192 | DRAFT_01860 | TIGR02651      | ribonuclease Z                                                   |                                                   | 2.20E-104 |
| 2558671192 | DRAFT_01860 | KO:K00784      | ribonuclease Z [EC:3.1.26.11]                                    |                                                   | 0.00E+00  |
| 2558671192 | DRAFT_01860 | Locus_type     |                                                                  | CDS                                               |           |
| 2558671192 | DRAFT_01860 | Product_name   |                                                                  | ribonuclease Z                                    |           |
| 2558671192 | DRAFT_01860 | Scaffold       |                                                                  | DRAFT_contig_70_2628_len_4836_read_count_74891.75 |           |
| 2558671192 | DRAFT_01860 | Coordinates    |                                                                  | 75..995(+)                                        |           |
| 2558671192 | DRAFT_01860 | DNA_length     |                                                                  | 921bp                                             |           |
| 2558671192 | DRAFT_01860 | Protein_length |                                                                  | 306aa                                             |           |
| 2558671192 | DRAFT_01860 | GC             |                                                                  |                                                   | 0.6       |
| 2558671192 | DRAFT_01860 | Fused_gene     |                                                                  | Yes                                               |           |
| 2558671193 | DRAFT_01861 | COG_category   | [S] Function unknown                                             |                                                   |           |
| 2558671193 | DRAFT_01861 | COG1931        | Uncharacterized protein conserved in archaea                     |                                                   | 6.00E-21  |
| 2558671193 | DRAFT_01861 | pfam01877      | RNA_binding                                                      |                                                   | 1.70E-13  |
| 2558671193 | DRAFT_01861 | KO:K09736      | hypothetical protein                                             |                                                   | 6.50E-17  |
| 2558671193 | DRAFT_01861 | Locus_type     |                                                                  | CDS                                               |           |
| 2558671193 | DRAFT_01861 | Product_name   |                                                                  | Uncharacterized protein conserved in archaea      |           |
| 2558671193 | DRAFT_01861 | Scaffold       |                                                                  | DRAFT_contig_70_2628_len_4836_read_count_74891.75 |           |
| 2558671193 | DRAFT_01861 | Coordinates    |                                                                  | 980..1345(-)                                      |           |
| 2558671193 | DRAFT_01861 | DNA_length     |                                                                  | 366bp                                             |           |

|            |             |                |                                                                                    |          |
|------------|-------------|----------------|------------------------------------------------------------------------------------|----------|
| 2558671193 | DRAFT_01861 | Protein_length | 121aa                                                                              |          |
| 2558671193 | DRAFT_01861 | GC             |                                                                                    | 0.56     |
| 2558671194 | DRAFT_01862 | COG_category   | [H] Coenzyme transport and metabolism                                              |          |
| 2558671194 | DRAFT_01862 | COG0237        | Dephospho-CoA kinase                                                               | 6.00E-15 |
| 2558671194 | DRAFT_01862 | pfam13207      | AAA_17                                                                             | 8.60E-13 |
| 2558671194 | DRAFT_01862 | Locus_type     | CDS                                                                                |          |
| 2558671194 | DRAFT_01862 | Product_name   | Dephospho-CoA kinase                                                               |          |
| 2558671194 | DRAFT_01862 | Scaffold       | DRAFT_contig_70_2628_len_4836_read_count_74891.75                                  |          |
| 2558671194 | DRAFT_01862 | Coordinates    | 1377..1958(-)                                                                      |          |
| 2558671194 | DRAFT_01862 | DNA_length     | 582bp                                                                              |          |
| 2558671194 | DRAFT_01862 | Protein_length | 193aa                                                                              |          |
| 2558671194 | DRAFT_01862 | GC             |                                                                                    | 0.61     |
| 2558671195 | DRAFT_01863 | Metacyc        | PWY-6689: tRNA splicing                                                            |          |
| 2558671195 | DRAFT_01863 | COG_category   | [J] Translation, ribosomal structure and biogenesis                                |          |
| 2558671195 | DRAFT_01863 | COG1514        | 2'-5' RNA ligase                                                                   | 1.00E-29 |
| 2558671195 | DRAFT_01863 | pfam02834      | LigT_PEase                                                                         | 1.60E-05 |
| 2558671195 | DRAFT_01863 | pfam02834      | LigT_PEase                                                                         | 6.90E-15 |
| 2558671195 | DRAFT_01863 | EC:6.5.1.-     | Ligases. Forming phosphoric ester bonds. Ligases that form phosphoric-ester bonds. |          |
| 2558671195 | DRAFT_01863 | TIGR02258      | 2'-5' RNA ligase                                                                   | 7.10E-41 |
| 2558671195 | DRAFT_01863 | KO:K01975      | 2'-5' RNA ligase [EC:6.5.1.-]                                                      | 3.30E-36 |
| 2558671195 | DRAFT_01863 | Locus_type     | CDS                                                                                |          |
| 2558671195 | DRAFT_01863 | Product_name   | 2'-5' RNA ligase                                                                   |          |
| 2558671195 | DRAFT_01863 | Scaffold       | DRAFT_contig_70_2628_len_4836_read_count_74891.75                                  |          |
| 2558671195 | DRAFT_01863 | Coordinates    | 1995..2549(+)                                                                      |          |
| 2558671195 | DRAFT_01863 | DNA_length     | 555bp                                                                              |          |
| 2558671195 | DRAFT_01863 | Protein_length | 184aa                                                                              |          |
| 2558671195 | DRAFT_01863 | GC             |                                                                                    | 0.58     |
| 2558671196 | DRAFT_01864 | COG_category   | [J] Translation, ribosomal structure and biogenesis                                |          |
| 2558671196 | DRAFT_01864 | COG1746        | tRNA nucleotidyltransferase (CCA-adding enzyme)                                    | 4.00E-72 |
| 2558671196 | DRAFT_01864 | pfam09249      | tRNA_NucTransf2                                                                    | 1.40E-26 |
| 2558671196 | DRAFT_01864 | pfam01909      | NTP_transf_2                                                                       | 3.90E-08 |



|            |             |                |                                                               |          |
|------------|-------------|----------------|---------------------------------------------------------------|----------|
| 2558671196 | DRAFT_01864 | EC:2.7.7.72    | CCA tRNA nucleotidyltransferase.                              |          |
| 2558671196 | DRAFT_01864 | TIGR03671      | CCA-adding enzyme                                             | 3.50E-93 |
| 2558671196 | DRAFT_01864 | KO:K07558      | tRNA nucleotidyltransferase (CCA-adding enzyme) [EC:2.7.7.72] | 0.00E+00 |
| 2558671196 | DRAFT_01864 | Locus_type     | CDS                                                           |          |
| 2558671196 | DRAFT_01864 | Product_name   | CCA-adding enzyme                                             |          |
| 2558671196 | DRAFT_01864 | Scaffold       | DRAFT_contig_70_2628_len_4836_read_count_74891.75             |          |
| 2558671196 | DRAFT_01864 | Coordinates    | 2546..3874(+)                                                 |          |
| 2558671196 | DRAFT_01864 | DNA_length     | 1329bp                                                        |          |
| 2558671196 | DRAFT_01864 | Protein_length | 442aa                                                         |          |
| 2558671196 | DRAFT_01864 | GC             |                                                               | 0.58     |
| 2558671197 | DRAFT_01865 | COG_category   | [T] Signal transduction mechanisms                            |          |
| 2558671197 | DRAFT_01865 | COG2112        | Predicted Ser/Thr protein kinase                              | 1.00E-29 |
| 2558671197 | DRAFT_01865 | KO:K07176      | putative serine/threonine protein kinase                      | 2.80E-45 |
| 2558671197 | DRAFT_01865 | Locus_type     | CDS                                                           |          |
| 2558671197 | DRAFT_01865 | Product_name   | Predicted Ser/Thr protein kinase                              |          |
| 2558671197 | DRAFT_01865 | Scaffold       | DRAFT_contig_70_2628_len_4836_read_count_74891.75             |          |
| 2558671197 | DRAFT_01865 | Coordinates    | 3879..4619(+)                                                 |          |
| 2558671197 | DRAFT_01865 | DNA_length     | 741bp                                                         |          |
| 2558671197 | DRAFT_01865 | Protein_length | 246aa                                                         |          |
| 2558671197 | DRAFT_01865 | GC             |                                                               | 0.56     |
| 2558671198 | DRAFT_01866 | Locus_type     | CDS                                                           |          |
| 2558671198 | DRAFT_01866 | Product_name   | hypothetical protein                                          |          |
| 2558671198 | DRAFT_01866 | Scaffold       | DRAFT_contig_70_2628_len_4836_read_count_74891.75             |          |
| 2558671198 | DRAFT_01866 | Coordinates    | 4647..4835(+)                                                 |          |
| 2558671198 | DRAFT_01866 | DNA_length     | 189bp                                                         |          |
| 2558671198 | DRAFT_01866 | Protein_length | 63aa                                                          |          |
| 2558671198 | DRAFT_01866 | GC             |                                                               | 0.54     |
| 2558671199 | DRAFT_01867 | COG_category   | [J] Translation, ribosomal structure and biogenesis           |          |
| 2558671199 | DRAFT_01867 | COG3277        | RNA-binding protein involved in rRNA processing               | 4.00E-06 |
| 2558671199 | DRAFT_01867 | KO:K07569      | RNA-binding protein                                           | 2.40E-06 |
| 2558671199 | DRAFT_01867 | Locus_type     | CDS                                                           |          |

|            |             |                |                                                                             |          |
|------------|-------------|----------------|-----------------------------------------------------------------------------|----------|
| 2558671199 | DRAFT_01867 | Product_name   | RNA-binding protein involved in rRNA processing                             |          |
| 2558671199 | DRAFT_01867 | Scaffold       | DRAFT_contig_70_2774_len_4708_read_count_68402.76                           |          |
| 2558671199 | DRAFT_01867 | Coordinates    | 46..267(+)                                                                  |          |
| 2558671199 | DRAFT_01867 | DNA_length     | 222bp                                                                       |          |
| 2558671199 | DRAFT_01867 | Protein_length | 73aa                                                                        |          |
| 2558671199 | DRAFT_01867 | GC             |                                                                             | 0.63     |
| 2558671200 | DRAFT_01868 | COG_category   | [K] Transcription                                                           |          |
| 2558671200 | DRAFT_01868 | COG1405        | Transcription initiation factor TFIIB, Brf1 subunit/Transcription initiatic | 1.00E-57 |
| 2558671200 | DRAFT_01868 | pfam00382      | TFIIB                                                                       | 6.30E-09 |
| 2558671200 | DRAFT_01868 | pfam00382      | TFIIB                                                                       | 3.60E-17 |
| 2558671200 | DRAFT_01868 | pfam08271      | TF_Zn_Ribbon                                                                | 3.30E-08 |
| 2558671200 | DRAFT_01868 | KO:K03124      | transcription initiation factor TFIIB                                       | 0.00E+00 |
| 2558671200 | DRAFT_01868 | Locus_type     | CDS                                                                         |          |
| 2558671200 | DRAFT_01868 | Product_name   | Transcription initiation factor TFIIB, Brf1 subunit/Transcription initiat   |          |
| 2558671200 | DRAFT_01868 | Scaffold       | DRAFT_contig_70_2774_len_4708_read_count_68402.76                           |          |
| 2558671200 | DRAFT_01868 | Coordinates    | 264..1220(+)                                                                |          |
| 2558671200 | DRAFT_01868 | DNA_length     | 957bp                                                                       |          |
| 2558671200 | DRAFT_01868 | Protein_length | 318aa                                                                       |          |
| 2558671200 | DRAFT_01868 | GC             |                                                                             | 0.6      |
| 2558671201 | DRAFT_01869 | Locus_type     | CDS                                                                         |          |
| 2558671201 | DRAFT_01869 | Product_name   | hypothetical protein                                                        |          |
| 2558671201 | DRAFT_01869 | Scaffold       | DRAFT_contig_70_2774_len_4708_read_count_68402.76                           |          |
| 2558671201 | DRAFT_01869 | Coordinates    | 1217..1750(+)                                                               |          |
| 2558671201 | DRAFT_01869 | DNA_length     | 534bp                                                                       |          |
| 2558671201 | DRAFT_01869 | Protein_length | 177aa                                                                       |          |
| 2558671201 | DRAFT_01869 | GC             |                                                                             | 0.62     |
| 2558671202 | DRAFT_01870 | COG_category   | [J] Translation, ribosomal structure and biogenesis                         |          |
| 2558671202 | DRAFT_01870 | COG0293        | 23S rRNA methylase                                                          | 2.00E-47 |
| 2558671202 | DRAFT_01870 | pfam01728      | FtsJ                                                                        | 1.60E-44 |
| 2558671202 | DRAFT_01870 | EC:2.1.1.166   | 23S rRNA (uridine(2552)-2'-O)-methyltransferase.                            |          |
| 2558671202 | DRAFT_01870 | TIGR00438      | cell division protein FtsJ                                                  | 1.60E-56 |

|            |             |                |                                                                           |          |
|------------|-------------|----------------|---------------------------------------------------------------------------|----------|
| 2558671202 | DRAFT_01870 | KO:K02427      | 23S rRNA (uridine2552-2'-O)-methyltransferase [EC:2.1.1.166]              | 1.10E-43 |
| 2558671202 | DRAFT_01870 | ITERM:06068    | 23S rRNA Um-2552 2'-O-methyltransferase (EC 2.1.1.166)                    |          |
| 2558671202 | DRAFT_01870 | Locus_type     | CDS                                                                       |          |
| 2558671202 | DRAFT_01870 | Product_name   | 23S rRNA Um-2552 2'-O-methyltransferase (EC 2.1.1.166)                    |          |
| 2558671202 | DRAFT_01870 | Scaffold       | DRAFT_contig_70_2774_len_4708_read_count_68402.76                         |          |
| 2558671202 | DRAFT_01870 | Coordinates    | 1773..2408(+)                                                             |          |
| 2558671202 | DRAFT_01870 | DNA_length     | 636bp                                                                     |          |
| 2558671202 | DRAFT_01870 | Protein_length | 211aa                                                                     |          |
| 2558671202 | DRAFT_01870 | GC             |                                                                           | 0.61     |
| 2558671203 | DRAFT_01871 | Metacyc        | PWY-6829: tRNA methylation (yeast)                                        |          |
| 2558671203 | DRAFT_01871 | COG_category   | [J] Translation, ribosomal structure and biogenesis                       |          |
| 2558671203 | DRAFT_01871 | COG1867        | N2,N2-dimethylguanosine tRNA methyltransferase                            | 2.00E-86 |
| 2558671203 | DRAFT_01871 | pfam02005      | TRM                                                                       | 5.50E-80 |
| 2558671203 | DRAFT_01871 | EC:2.1.1.216   | tRNA (guanine(26)-N(2))-dimethyltransferase.                              |          |
| 2558671203 | DRAFT_01871 | EC:2.1.1.215   | tRNA (guanine(26)-N(2)/guanine(27)-N(2))-dimethyltransferase.             |          |
| 2558671203 | DRAFT_01871 | TIGR00308      | tRNA(guanine-26,N2-N2) methyltransferase                                  | 2.50E-76 |
| 2558671203 | DRAFT_01871 | KO:K00555      | tRNA (guanine26-N2/guanine27-N2)-dimethyltransferase [EC:2.1.1.215        | 0.00E+00 |
| 2558671203 | DRAFT_01871 | Locus_type     | CDS                                                                       |          |
| 2558671203 | DRAFT_01871 | Product_name   | N2,N2-dimethylguanosine tRNA methyltransferase                            |          |
| 2558671203 | DRAFT_01871 | Scaffold       | DRAFT_contig_70_2774_len_4708_read_count_68402.76                         |          |
| 2558671203 | DRAFT_01871 | Coordinates    | 2425..3570(-)                                                             |          |
| 2558671203 | DRAFT_01871 | DNA_length     | 1146bp                                                                    |          |
| 2558671203 | DRAFT_01871 | Protein_length | 381aa                                                                     |          |
| 2558671203 | DRAFT_01871 | GC             |                                                                           | 0.64     |
| 2558671204 | DRAFT_01872 | Metacyc        | PWY-7198: pyrimidine deoxyribonucleotides <i>de novo</i> biosynthesis IV  |          |
| 2558671204 | DRAFT_01872 | Metacyc        | PWY-7210: pyrimidine deoxyribonucleotides biosynthesis from CTP           |          |
| 2558671204 | DRAFT_01872 | Metacyc        | PWY-7185: UTP and CTP dephosphorylation I                                 |          |
| 2558671204 | DRAFT_01872 | Metacyc        | PWY-6545: pyrimidine deoxyribonucleotides <i>de novo</i> biosynthesis III |          |
| 2558671204 | DRAFT_01872 | Metacyc        | PWY-7184: pyrimidine deoxyribonucleotides <i>de novo</i> biosynthesis I   |          |
| 2558671204 | DRAFT_01872 | COG_category   | [F] Nucleotide transport and metabolism                                   |          |
| 2558671204 | DRAFT_01872 | COG1618        | Predicted nucleotide kinase                                               | 3.00E-35 |
| 2558671204 | DRAFT_01872 | pfam03266      | NTPase_1                                                                  | 5.20E-48 |

|            |             |                |                                                     |          |
|------------|-------------|----------------|-----------------------------------------------------|----------|
| 2558671204 | DRAFT_01872 | EC:3.6.1.15    | Nucleoside-triphosphatase.                          |          |
| 2558671204 | DRAFT_01872 | KO:K06928      | nucleoside-triphosphatase THEP1 [EC:3.6.1.15]       | 6.40E-32 |
| 2558671204 | DRAFT_01872 | Locus_type     | CDS                                                 |          |
| 2558671204 | DRAFT_01872 | Product_name   | Predicted nucleotide kinase                         |          |
| 2558671204 | DRAFT_01872 | Scaffold       | DRAFT_contig_70_2774_len_4708_read_count_68402.76   |          |
| 2558671204 | DRAFT_01872 | Coordinates    | 3672..4223(+)                                       |          |
| 2558671204 | DRAFT_01872 | DNA_length     | 552bp                                               |          |
| 2558671204 | DRAFT_01872 | Protein_length | 183aa                                               |          |
| 2558671204 | DRAFT_01872 | GC             |                                                     | 0.62     |
|            |             |                |                                                     |          |
| 2558671205 | DRAFT_01873 | IMG_pathway    | 437: Archaeal replication elongation                |          |
| 2558671205 | DRAFT_01873 | IMG_pathway    | 46: Okazaki fragment processing                     |          |
| 2558671205 | DRAFT_01873 | pfam01351      | RNase_HII                                           | 1.10E-26 |
| 2558671205 | DRAFT_01873 | TIGR00729      | ribonuclease H, mammalian HI/archaeal HII subfamily | 3.10E-38 |
| 2558671205 | DRAFT_01873 | ITERM:00110    | RNase HII (EC 3.1.26.4)                             |          |
| 2558671205 | DRAFT_01873 | Locus_type     | CDS                                                 |          |
| 2558671205 | DRAFT_01873 | Product_name   | RNase HII (EC 3.1.26.4)                             |          |
| 2558671205 | DRAFT_01873 | Scaffold       | DRAFT_contig_70_2774_len_4708_read_count_68402.76   |          |
| 2558671205 | DRAFT_01873 | Coordinates    | 4250..4705(+)                                       |          |
| 2558671205 | DRAFT_01873 | DNA_length     | 456bp                                               |          |
| 2558671205 | DRAFT_01873 | Protein_length | 152aa                                               |          |
| 2558671205 | DRAFT_01873 | GC             |                                                     | 0.62     |
|            |             |                |                                                     |          |
| 2558671206 | DRAFT_01874 | Locus_type     | CDS                                                 |          |
| 2558671206 | DRAFT_01874 | Product_name   | hypothetical protein                                |          |
| 2558671206 | DRAFT_01874 | Scaffold       | DRAFT_contig_70_2934_len_4568_read_count_79327.77   |          |
| 2558671206 | DRAFT_01874 | Coordinates    | 7..516(-)                                           |          |
| 2558671206 | DRAFT_01874 | DNA_length     | 510bp                                               |          |
| 2558671206 | DRAFT_01874 | Protein_length | 169aa                                               |          |
| 2558671206 | DRAFT_01874 | GC             |                                                     | 0.57     |
|            |             |                |                                                     |          |
| 2558671207 | DRAFT_01875 | pfam12705      | PDDEXK_1                                            | 2.10E-08 |
| 2558671207 | DRAFT_01875 | Locus_type     | CDS                                                 |          |
| 2558671207 | DRAFT_01875 | Product_name   | PD-(D/E)XK nuclease superfamily                     |          |

|            |             |                |                                                   |          |
|------------|-------------|----------------|---------------------------------------------------|----------|
| 2558671207 | DRAFT_01875 | Scaffold       | DRAFT_contig_70_2934_len_4568_read_count_79327.77 |          |
| 2558671207 | DRAFT_01875 | Coordinates    | 789..1589(+)                                      |          |
| 2558671207 | DRAFT_01875 | DNA_length     | 801bp                                             |          |
| 2558671207 | DRAFT_01875 | Protein_length | 266aa                                             |          |
| 2558671207 | DRAFT_01875 | GC             |                                                   | 0.6      |
| 2558671208 | DRAFT_01876 | COG_category   | [K] Transcription                                 |          |
| 2558671208 | DRAFT_01876 | COG1309        | Transcriptional regulator                         | 3.00E-09 |
| 2558671208 | DRAFT_01876 | pfam13977      | TetR_C_6                                          | 1.60E-06 |
| 2558671208 | DRAFT_01876 | pfam00440      | TetR_N                                            | 2.30E-18 |
| 2558671208 | DRAFT_01876 | ITERM:02313    | transcriptional regulator, TetR family            |          |
| 2558671208 | DRAFT_01876 | Locus_type     | CDS                                               |          |
| 2558671208 | DRAFT_01876 | Product_name   | transcriptional regulator, TetR family            |          |
| 2558671208 | DRAFT_01876 | Scaffold       | DRAFT_contig_70_2934_len_4568_read_count_79327.77 |          |
| 2558671208 | DRAFT_01876 | Coordinates    | 1711..2280(-)                                     |          |
| 2558671208 | DRAFT_01876 | DNA_length     | 570bp                                             |          |
| 2558671208 | DRAFT_01876 | Protein_length | 189aa                                             |          |
| 2558671208 | DRAFT_01876 | GC             |                                                   | 0.58     |
| 2558671209 | DRAFT_01877 | Locus_type     | CDS                                               |          |
| 2558671209 | DRAFT_01877 | Product_name   | hypothetical protein                              |          |
| 2558671209 | DRAFT_01877 | Scaffold       | DRAFT_contig_70_2934_len_4568_read_count_79327.77 |          |
| 2558671209 | DRAFT_01877 | Coordinates    | 2385..2681(+)                                     |          |
| 2558671209 | DRAFT_01877 | DNA_length     | 297bp                                             |          |
| 2558671209 | DRAFT_01877 | Protein_length | 98aa                                              |          |
| 2558671209 | DRAFT_01877 | GC             |                                                   | 0.6      |
| 2558671209 | DRAFT_01877 | Transmembrane  | Yes                                               |          |
| 2558671210 | DRAFT_01878 | COG_category   | [G] Carbohydrate transport and metabolism         |          |
| 2558671210 | DRAFT_01878 | COG2814        | Arabinose efflux permease                         | 4.00E-08 |
| 2558671210 | DRAFT_01878 | pfam07690      | MFS_1                                             | 6.40E-19 |
| 2558671210 | DRAFT_01878 | Locus_type     | CDS                                               |          |
| 2558671210 | DRAFT_01878 | Product_name   | Arabinose efflux permease                         |          |
| 2558671210 | DRAFT_01878 | Scaffold       | DRAFT_contig_70_2934_len_4568_read_count_79327.77 |          |

|            |             |                |                                                   |      |
|------------|-------------|----------------|---------------------------------------------------|------|
| 2558671210 | DRAFT_01878 | Coordinates    | 2688..3938(+)                                     |      |
| 2558671210 | DRAFT_01878 | DNA_length     | 1251bp                                            |      |
| 2558671210 | DRAFT_01878 | Protein_length | 416aa                                             |      |
| 2558671210 | DRAFT_01878 | GC             |                                                   | 0.62 |
| 2558671210 | DRAFT_01878 | Transmembrane  | Yes                                               |      |
|            |             |                |                                                   |      |
| 2558671211 | DRAFT_01879 | Locus_type     | CDS                                               |      |
| 2558671211 | DRAFT_01879 | Product_name   | hypothetical protein                              |      |
| 2558671211 | DRAFT_01879 | Scaffold       | DRAFT_contig_70_2934_len_4568_read_count_79327.77 |      |
| 2558671211 | DRAFT_01879 | Coordinates    | 4126..4392(+)                                     |      |
| 2558671211 | DRAFT_01879 | DNA_length     | 267bp                                             |      |
| 2558671211 | DRAFT_01879 | Protein_length | 88aa                                              |      |
| 2558671211 | DRAFT_01879 | GC             |                                                   | 0.52 |
|            |             |                |                                                   |      |
| 2558671212 | DRAFT_01880 | Locus_type     | CDS                                               |      |
| 2558671212 | DRAFT_01880 | Product_name   | hypothetical protein                              |      |
| 2558671212 | DRAFT_01880 | Scaffold       | DRAFT_contig_70_3644_len_4074_read_count_68363.78 |      |
| 2558671212 | DRAFT_01880 | Coordinates    | 1..285(+)                                         |      |
| 2558671212 | DRAFT_01880 | DNA_length     | 285bp                                             |      |
| 2558671212 | DRAFT_01880 | Protein_length | 94aa                                              |      |
| 2558671212 | DRAFT_01880 | GC             |                                                   | 0.52 |
|            |             |                |                                                   |      |
| 2558671213 | DRAFT_01881 | Locus_type     | CDS                                               |      |
| 2558671213 | DRAFT_01881 | Product_name   | hypothetical protein                              |      |
| 2558671213 | DRAFT_01881 | Scaffold       | DRAFT_contig_70_3644_len_4074_read_count_68363.78 |      |
| 2558671213 | DRAFT_01881 | Coordinates    | 369..530(+)                                       |      |
| 2558671213 | DRAFT_01881 | DNA_length     | 162bp                                             |      |
| 2558671213 | DRAFT_01881 | Protein_length | 53aa                                              |      |
| 2558671213 | DRAFT_01881 | GC             |                                                   | 0.44 |
|            |             |                |                                                   |      |
| 2558671214 | DRAFT_01882 | Locus_type     | CDS                                               |      |
| 2558671214 | DRAFT_01882 | Product_name   | hypothetical protein                              |      |
| 2558671214 | DRAFT_01882 | Scaffold       | DRAFT_contig_70_3644_len_4074_read_count_68363.78 |      |
| 2558671214 | DRAFT_01882 | Coordinates    | 499..696(-)                                       |      |

|            |             |                |                                                          |           |
|------------|-------------|----------------|----------------------------------------------------------|-----------|
| 2558671214 | DRAFT_01882 | DNA_length     | 198bp                                                    |           |
| 2558671214 | DRAFT_01882 | Protein_length | 65aa                                                     |           |
| 2558671214 | DRAFT_01882 | GC             |                                                          | 0.51      |
| 2558671215 | DRAFT_01883 | COG_category   | [C] Energy production and conversion                     |           |
| 2558671215 | DRAFT_01883 | COG1042        | Acyl-CoA synthetase (NDP forming)                        | 8.00E-129 |
| 2558671215 | DRAFT_01883 | pfam13380      | CoA_binding_2                                            | 9.40E-23  |
| 2558671215 | DRAFT_01883 | pfam13549      | ATP-grasp_5                                              | 1.00E-65  |
| 2558671215 | DRAFT_01883 | pfam00583      | Acetyltransf_1                                           | 5.70E-08  |
| 2558671215 | DRAFT_01883 | pfam13607      | Succ_CoA_lig                                             | 1.60E-50  |
| 2558671215 | DRAFT_01883 | TIGR02717      | acetyl coenzyme A synthetase (ADP forming), alpha domain | 0.00E+00  |
| 2558671215 | DRAFT_01883 | Locus_type     | CDS                                                      |           |
| 2558671215 | DRAFT_01883 | Product_name   | Acyl-CoA synthetase (NDP forming)                        |           |
| 2558671215 | DRAFT_01883 | Scaffold       | DRAFT_contig_70_3644_len_4074_read_count_68363.78        |           |
| 2558671215 | DRAFT_01883 | Coordinates    | 865..3420(+)                                             |           |
| 2558671215 | DRAFT_01883 | DNA_length     | 2556bp                                                   |           |
| 2558671215 | DRAFT_01883 | Protein_length | 851aa                                                    |           |
| 2558671215 | DRAFT_01883 | GC             |                                                          | 0.57      |
| 2558671215 | DRAFT_01883 | Fused_gene     | Yes                                                      |           |
| 2558671216 | DRAFT_01884 | COG_category   | [S] Function unknown                                     |           |
| 2558671216 | DRAFT_01884 | COG0011        | Uncharacterized conserved protein                        | 5.00E-12  |
| 2558671216 | DRAFT_01884 | pfam01910      | DUF77                                                    | 1.50E-19  |
| 2558671216 | DRAFT_01884 | TIGR00106      | uncharacterized protein, MTH1187 family                  | 1.20E-22  |
| 2558671216 | DRAFT_01884 | Locus_type     | CDS                                                      |           |
| 2558671216 | DRAFT_01884 | Product_name   | Uncharacterized conserved protein                        |           |
| 2558671216 | DRAFT_01884 | Scaffold       | DRAFT_contig_70_3644_len_4074_read_count_68363.78        |           |
| 2558671216 | DRAFT_01884 | Coordinates    | 3647..3994(-)                                            |           |
| 2558671216 | DRAFT_01884 | DNA_length     | 348bp                                                    |           |
| 2558671216 | DRAFT_01884 | Protein_length | 115aa                                                    |           |
| 2558671216 | DRAFT_01884 | GC             |                                                          | 0.49      |
| 2558671217 | DRAFT_01885 | pfam00881      | Nitroreductase                                           | 2.50E-07  |
| 2558671217 | DRAFT_01885 | Locus_type     | CDS                                                      |           |

|            |             |                |                                                                    |          |
|------------|-------------|----------------|--------------------------------------------------------------------|----------|
| 2558671217 | DRAFT_01885 | Product_name   | Nitroreductase                                                     |          |
| 2558671217 | DRAFT_01885 | Scaffold       | DRAFT_contig_70_4003_len_3871_read_count_63941.79                  |          |
| 2558671217 | DRAFT_01885 | Coordinates    | 1..231(-)                                                          |          |
| 2558671217 | DRAFT_01885 | DNA_length     | 231bp                                                              |          |
| 2558671217 | DRAFT_01885 | Protein_length | 77aa                                                               |          |
| 2558671217 | DRAFT_01885 | GC             |                                                                    | 0.54     |
|            |             |                |                                                                    |          |
| 2558671218 | DRAFT_01886 | COG_category   | [G] Carbohydrate transport and metabolism                          |          |
| 2558671218 | DRAFT_01886 | COG2814        | Arabinose efflux permease                                          | 1.00E-15 |
| 2558671218 | DRAFT_01886 | pfam07690      | MFS_1                                                              | 1.40E-26 |
| 2558671218 | DRAFT_01886 | Locus_type     | CDS                                                                |          |
| 2558671218 | DRAFT_01886 | Product_name   | Arabinose efflux permease                                          |          |
| 2558671218 | DRAFT_01886 | Scaffold       | DRAFT_contig_70_4003_len_3871_read_count_63941.79                  |          |
| 2558671218 | DRAFT_01886 | Coordinates    | 287..1474(-)                                                       |          |
| 2558671218 | DRAFT_01886 | DNA_length     | 1188bp                                                             |          |
| 2558671218 | DRAFT_01886 | Protein_length | 395aa                                                              |          |
| 2558671218 | DRAFT_01886 | GC             |                                                                    | 0.59     |
| 2558671218 | DRAFT_01886 | Transmembrane  | Yes                                                                |          |
|            |             |                |                                                                    |          |
| 2558671219 | DRAFT_01887 | Locus_type     | CDS                                                                |          |
| 2558671219 | DRAFT_01887 | Product_name   | hypothetical protein                                               |          |
| 2558671219 | DRAFT_01887 | Scaffold       | DRAFT_contig_70_4003_len_3871_read_count_63941.79                  |          |
| 2558671219 | DRAFT_01887 | Coordinates    | 1599..1832(-)                                                      |          |
| 2558671219 | DRAFT_01887 | DNA_length     | 234bp                                                              |          |
| 2558671219 | DRAFT_01887 | Protein_length | 77aa                                                               |          |
| 2558671219 | DRAFT_01887 | GC             |                                                                    | 0.54     |
|            |             |                |                                                                    |          |
| 2558671220 | DRAFT_01888 | COG_category   | [E] Amino acid transport and metabolism                            |          |
| 2558671220 | DRAFT_01888 | COG0531        | Amino acid transporters                                            | 2.00E-35 |
| 2558671220 | DRAFT_01888 | pfam13520      | AA_permease_2                                                      | 5.70E-47 |
| 2558671220 | DRAFT_01888 | Locus_type     | CDS                                                                |          |
| 2558671220 | DRAFT_01888 | Product_name   | amino acid/polyamine/organocation transporter, APC superfamily (TC |          |
| 2558671220 | DRAFT_01888 | Scaffold       | DRAFT_contig_70_4003_len_3871_read_count_63941.79                  |          |
| 2558671220 | DRAFT_01888 | Coordinates    | 1922..3319(-)                                                      |          |



|            |             |                |                                                   |          |
|------------|-------------|----------------|---------------------------------------------------|----------|
| 2558671220 | DRAFT_01888 | DNA_length     | 1398bp                                            |          |
| 2558671220 | DRAFT_01888 | Protein_length | 465aa                                             |          |
| 2558671220 | DRAFT_01888 | GC             |                                                   | 0.53     |
| 2558671220 | DRAFT_01888 | Transmembrane  | Yes                                               |          |
|            |             |                |                                                   |          |
| 2558671221 | DRAFT_01889 | Locus_type     | CDS                                               |          |
| 2558671221 | DRAFT_01889 | Product_name   | hypothetical protein                              |          |
| 2558671221 | DRAFT_01889 | Scaffold       | DRAFT_contig_70_4003_len_3871_read_count_63941.79 |          |
| 2558671221 | DRAFT_01889 | Coordinates    | 3510..3869(-)                                     |          |
| 2558671221 | DRAFT_01889 | DNA_length     | 360bp                                             |          |
| 2558671221 | DRAFT_01889 | Protein_length | 119aa                                             |          |
| 2558671221 | DRAFT_01889 | GC             |                                                   | 0.52     |
|            |             |                |                                                   |          |
| 2558671222 | DRAFT_01890 | Locus_type     | CDS                                               |          |
| 2558671222 | DRAFT_01890 | Product_name   | hypothetical protein                              |          |
| 2558671222 | DRAFT_01890 | Scaffold       | DRAFT_contig_70_4296_len_3706_read_count_61295.80 |          |
| 2558671222 | DRAFT_01890 | Coordinates    | 3..611(-)                                         |          |
| 2558671222 | DRAFT_01890 | DNA_length     | 609bp                                             |          |
| 2558671222 | DRAFT_01890 | Protein_length | 203aa                                             |          |
| 2558671222 | DRAFT_01890 | GC             |                                                   | 0.58     |
| 2558671222 | DRAFT_01890 | Transmembrane  | Yes                                               |          |
|            |             |                |                                                   |          |
| 2558671223 | DRAFT_01891 | COG_category   | [S] Function unknown                              |          |
| 2558671223 | DRAFT_01891 | COG1478        | Uncharacterized conserved protein                 | 3.00E-53 |
| 2558671223 | DRAFT_01891 | pfam01996      | F420_ligase                                       | 2.20E-57 |
| 2558671223 | DRAFT_01891 | TIGR01916      | F420-0:gamma-glutamyl ligase                      | 2.80E-64 |
| 2558671223 | DRAFT_01891 | Locus_type     | CDS                                               |          |
| 2558671223 | DRAFT_01891 | Product_name   | Uncharacterized conserved protein                 |          |
| 2558671223 | DRAFT_01891 | Scaffold       | DRAFT_contig_70_4296_len_3706_read_count_61295.80 |          |
| 2558671223 | DRAFT_01891 | Coordinates    | 763..1572(-)                                      |          |
| 2558671223 | DRAFT_01891 | DNA_length     | 810bp                                             |          |
| 2558671223 | DRAFT_01891 | Protein_length | 269aa                                             |          |
| 2558671223 | DRAFT_01891 | GC             |                                                   | 0.58     |

|            |             |                |                                                                      |          |
|------------|-------------|----------------|----------------------------------------------------------------------|----------|
| 2558671224 | DRAFT_01892 | COG_category   | [R] General function prediction only                                 |          |
| 2558671224 | DRAFT_01892 | COG1719        | Predicted hydrocarbon binding protein (contains V4R domain)          | 2.00E-09 |
| 2558671224 | DRAFT_01892 | pfam02830      | V4R                                                                  | 6.20E-12 |
| 2558671224 | DRAFT_01892 | Locus_type     | CDS                                                                  |          |
| 2558671224 | DRAFT_01892 | Product_name   | Predicted hydrocarbon binding protein (contains V4R domain)          |          |
| 2558671224 | DRAFT_01892 | Scaffold       | DRAFT_contig_70_4296_len_3706_read_count_61295.80                    |          |
| 2558671224 | DRAFT_01892 | Coordinates    | 2468..3247(-)                                                        |          |
| 2558671224 | DRAFT_01892 | DNA_length     | 780bp                                                                |          |
| 2558671224 | DRAFT_01892 | Protein_length | 259aa                                                                |          |
| 2558671224 | DRAFT_01892 | GC             |                                                                      | 0.58     |
| 2558671225 | DRAFT_01893 | KEGG_module    | M00244: Putative zinc/manganese transport system                     |          |
| 2558671225 | DRAFT_01893 | COG_category   | [P] Inorganic ion transport and metabolism                           |          |
| 2558671225 | DRAFT_01893 | COG0803        | ABC-type metal ion transport system, periplasmic component/surface : | 7.00E-30 |
| 2558671225 | DRAFT_01893 | pfam01297      | TroA                                                                 | 3.00E-40 |
| 2558671225 | DRAFT_01893 | KO:K02077      | zinc/manganese transport system substrate-binding protein            | 0.00E+00 |
| 2558671225 | DRAFT_01893 | Locus_type     | CDS                                                                  |          |
| 2558671225 | DRAFT_01893 | Product_name   | ABC-type metal ion transport system, periplasmic component/surface   |          |
| 2558671225 | DRAFT_01893 | Scaffold       | DRAFT_contig_70_4344_len_3679_read_count_66053.81                    |          |
| 2558671225 | DRAFT_01893 | Coordinates    | 243..1202(+)                                                         |          |
| 2558671225 | DRAFT_01893 | DNA_length     | 960bp                                                                |          |
| 2558671225 | DRAFT_01893 | Protein_length | 319aa                                                                |          |
| 2558671225 | DRAFT_01893 | GC             |                                                                      | 0.55     |
| 2558671225 | DRAFT_01893 | Transmembrane  | Yes                                                                  |          |
| 2558671226 | DRAFT_01894 | KEGG_module    | M00244: Putative zinc/manganese transport system                     |          |
| 2558671226 | DRAFT_01894 | COG_category   | [P] Inorganic ion transport and metabolism                           |          |
| 2558671226 | DRAFT_01894 | COG1121        | ABC-type Mn/Zn transport systems, ATPase component                   | 2.00E-59 |
| 2558671226 | DRAFT_01894 | pfam00005      | ABC_tran                                                             | 9.30E-27 |
| 2558671226 | DRAFT_01894 | KO:K02074      | zinc/manganese transport system ATP-binding protein                  | 0.00E+00 |
| 2558671226 | DRAFT_01894 | Locus_type     | CDS                                                                  |          |
| 2558671226 | DRAFT_01894 | Product_name   | ABC-type Mn/Zn transport systems, ATPase component                   |          |
| 2558671226 | DRAFT_01894 | Scaffold       | DRAFT_contig_70_4344_len_3679_read_count_66053.81                    |          |
| 2558671226 | DRAFT_01894 | Coordinates    | 1209..1997(+)                                                        |          |

|            |             |                |                                                                                    |          |
|------------|-------------|----------------|------------------------------------------------------------------------------------|----------|
| 2558671226 | DRAFT_01894 | DNA_length     | 789bp                                                                              |          |
| 2558671226 | DRAFT_01894 | Protein_length | 262aa                                                                              |          |
| 2558671226 | DRAFT_01894 | GC             |                                                                                    | 0.59     |
| 2558671227 | DRAFT_01895 | KEGG_module    | M00244: Putative zinc/manganese transport system                                   |          |
| 2558671227 | DRAFT_01895 | COG_category   | [P] Inorganic ion transport and metabolism                                         |          |
| 2558671227 | DRAFT_01895 | COG1108        | ABC-type Mn <sup>2+</sup> /Zn <sup>2+</sup> transport systems, permease components | 3.00E-34 |
| 2558671227 | DRAFT_01895 | pfam00950      | ABC-3                                                                              | 6.70E-49 |
| 2558671227 | DRAFT_01895 | KO:K02075      | zinc/manganese transport system permease protein                                   | 0.00E+00 |
| 2558671227 | DRAFT_01895 | Locus_type     | CDS                                                                                |          |
| 2558671227 | DRAFT_01895 | Product_name   | ABC-type Mn <sup>2+</sup> /Zn <sup>2+</sup> transport systems, permease components |          |
| 2558671227 | DRAFT_01895 | Scaffold       | DRAFT_contig_70_4344_len_3679_read_count_66053.81                                  |          |
| 2558671227 | DRAFT_01895 | Coordinates    | 1994..2893(+)                                                                      |          |
| 2558671227 | DRAFT_01895 | DNA_length     | 900bp                                                                              |          |
| 2558671227 | DRAFT_01895 | Protein_length | 299aa                                                                              |          |
| 2558671227 | DRAFT_01895 | GC             |                                                                                    | 0.56     |
| 2558671227 | DRAFT_01895 | Transmembrane  | Yes                                                                                |          |
| 2558671228 | DRAFT_01896 | COG_category   | [K] Transcription                                                                  |          |
| 2558671228 | DRAFT_01896 | COG0864        | Predicted transcriptional regulators containing the CopG/Arc/MetJ DN               | 5.00E-16 |
| 2558671228 | DRAFT_01896 | pfam08753      | NikR_C                                                                             | 1.90E-08 |
| 2558671228 | DRAFT_01896 | KO:K07722      | CopG family transcriptional regulator, nickel-responsive regulator                 | 1.90E-27 |
| 2558671228 | DRAFT_01896 | Locus_type     | CDS                                                                                |          |
| 2558671228 | DRAFT_01896 | Product_name   | Predicted transcriptional regulators containing the CopG/Arc/MetJ DN               |          |
| 2558671228 | DRAFT_01896 | Scaffold       | DRAFT_contig_70_4344_len_3679_read_count_66053.81                                  |          |
| 2558671228 | DRAFT_01896 | Coordinates    | 3013..3396(+)                                                                      |          |
| 2558671228 | DRAFT_01896 | DNA_length     | 384bp                                                                              |          |
| 2558671228 | DRAFT_01896 | Protein_length | 127aa                                                                              |          |
| 2558671228 | DRAFT_01896 | GC             |                                                                                    | 0.52     |
| 2558671229 | DRAFT_01897 | pfam05048      | NosD                                                                               | 2.20E-06 |
| 2558671229 | DRAFT_01897 | TIGR03804      | parallel beta-helix repeat (two copies)                                            | 1.30E-07 |
| 2558671229 | DRAFT_01897 | Locus_type     | CDS                                                                                |          |
| 2558671229 | DRAFT_01897 | Product_name   | Periplasmic copper-binding protein (NosD)                                          |          |

|            |             |                |                                           |                                                   |          |
|------------|-------------|----------------|-------------------------------------------|---------------------------------------------------|----------|
| 2558671229 | DRAFT_01897 | Scaffold       |                                           | DRAFT_contig_70_4376_len_3665_read_count_58296.82 |          |
| 2558671229 | DRAFT_01897 | Coordinates    |                                           | 1..285(+)                                         |          |
| 2558671229 | DRAFT_01897 | DNA_length     |                                           | 285bp                                             |          |
| 2558671229 | DRAFT_01897 | Protein_length |                                           | 94aa                                              |          |
| 2558671229 | DRAFT_01897 | GC             |                                           |                                                   | 0.56     |
|            |             |                |                                           |                                                   |          |
| 2558671230 | DRAFT_01898 | COG_category   | [G] Carbohydrate transport and metabolism |                                                   |          |
| 2558671230 | DRAFT_01898 | COG2814        | Arabinose efflux permease                 |                                                   | 6.00E-08 |
| 2558671230 | DRAFT_01898 | pfam07690      | MFS_1                                     |                                                   | 1.90E-26 |
| 2558671230 | DRAFT_01898 | Locus_type     |                                           | CDS                                               |          |
| 2558671230 | DRAFT_01898 | Product_name   |                                           | Arabinose efflux permease                         |          |
| 2558671230 | DRAFT_01898 | Scaffold       |                                           | DRAFT_contig_70_4376_len_3665_read_count_58296.82 |          |
| 2558671230 | DRAFT_01898 | Coordinates    |                                           | 482..1696(-)                                      |          |
| 2558671230 | DRAFT_01898 | DNA_length     |                                           | 1215bp                                            |          |
| 2558671230 | DRAFT_01898 | Protein_length |                                           | 404aa                                             |          |
| 2558671230 | DRAFT_01898 | GC             |                                           |                                                   | 0.58     |
| 2558671230 | DRAFT_01898 | Transmembrane  |                                           | Yes                                               |          |
|            |             |                |                                           |                                                   |          |
| 2558671231 | DRAFT_01899 | Locus_type     |                                           | CDS                                               |          |
| 2558671231 | DRAFT_01899 | Product_name   |                                           | hypothetical protein                              |          |
| 2558671231 | DRAFT_01899 | Scaffold       |                                           | DRAFT_contig_70_4376_len_3665_read_count_58296.82 |          |
| 2558671231 | DRAFT_01899 | Coordinates    |                                           | 1780..2118(-)                                     |          |
| 2558671231 | DRAFT_01899 | DNA_length     |                                           | 339bp                                             |          |
| 2558671231 | DRAFT_01899 | Protein_length |                                           | 112aa                                             |          |
| 2558671231 | DRAFT_01899 | GC             |                                           |                                                   | 0.56     |
| 2558671231 | DRAFT_01899 | Transmembrane  |                                           | Yes                                               |          |
|            |             |                |                                           |                                                   |          |
| 2558671232 | DRAFT_01900 | Locus_type     |                                           | CDS                                               |          |
| 2558671232 | DRAFT_01900 | Product_name   |                                           | hypothetical protein                              |          |
| 2558671232 | DRAFT_01900 | Scaffold       |                                           | DRAFT_contig_70_4376_len_3665_read_count_58296.82 |          |
| 2558671232 | DRAFT_01900 | Coordinates    |                                           | 2222..2767(-)                                     |          |
| 2558671232 | DRAFT_01900 | DNA_length     |                                           | 546bp                                             |          |
| 2558671232 | DRAFT_01900 | Protein_length |                                           | 181aa                                             |          |
| 2558671232 | DRAFT_01900 | GC             |                                           |                                                   | 0.6      |

|            |             |                |                                                                       |                                                                       |          |
|------------|-------------|----------------|-----------------------------------------------------------------------|-----------------------------------------------------------------------|----------|
| 2558671232 | DRAFT_01900 | Transmembrane  |                                                                       | Yes                                                                   |          |
| 2558671233 | DRAFT_01901 | Locus_type     |                                                                       | CDS                                                                   |          |
| 2558671233 | DRAFT_01901 | Product_name   |                                                                       | hypothetical protein                                                  |          |
| 2558671233 | DRAFT_01901 | Scaffold       |                                                                       | DRAFT_contig_70_4376_len_3665_read_count_58296.82                     |          |
| 2558671233 | DRAFT_01901 | Coordinates    |                                                                       | 3139..3663(+)                                                         |          |
| 2558671233 | DRAFT_01901 | DNA_length     |                                                                       | 525bp                                                                 |          |
| 2558671233 | DRAFT_01901 | Protein_length |                                                                       | 175aa                                                                 |          |
| 2558671233 | DRAFT_01901 | GC             |                                                                       |                                                                       | 0.55     |
| 2558671233 | DRAFT_01901 | Transmembrane  |                                                                       | Yes                                                                   |          |
| 2558671234 | DRAFT_01902 | pfam12697      | Abhydrolase_6                                                         |                                                                       | 1.00E-11 |
| 2558671234 | DRAFT_01902 | Locus_type     |                                                                       | CDS                                                                   |          |
| 2558671234 | DRAFT_01902 | Product_name   |                                                                       | Predicted hydrolases or acyltransferases (alpha/beta hydrolase superi |          |
| 2558671234 | DRAFT_01902 | Scaffold       |                                                                       | DRAFT_contig_70_4496_len_3618_read_count_57001.83                     |          |
| 2558671234 | DRAFT_01902 | Coordinates    |                                                                       | 1..360(+)                                                             |          |
| 2558671234 | DRAFT_01902 | DNA_length     |                                                                       | 360bp                                                                 |          |
| 2558671234 | DRAFT_01902 | Protein_length |                                                                       | 119aa                                                                 |          |
| 2558671234 | DRAFT_01902 | GC             |                                                                       |                                                                       | 0.58     |
| 2558671235 | DRAFT_01903 | pfam03029      | ATP_bind_1                                                            |                                                                       | 1.80E-41 |
| 2558671235 | DRAFT_01903 | Locus_type     |                                                                       | CDS                                                                   |          |
| 2558671235 | DRAFT_01903 | Product_name   |                                                                       | Conserved hypothetical ATP binding protein                            |          |
| 2558671235 | DRAFT_01903 | Scaffold       |                                                                       | DRAFT_contig_70_4496_len_3618_read_count_57001.83                     |          |
| 2558671235 | DRAFT_01903 | Coordinates    |                                                                       | 350..1000(-)                                                          |          |
| 2558671235 | DRAFT_01903 | DNA_length     |                                                                       | 651bp                                                                 |          |
| 2558671235 | DRAFT_01903 | Protein_length |                                                                       | 216aa                                                                 |          |
| 2558671235 | DRAFT_01903 | GC             |                                                                       |                                                                       | 0.59     |
| 2558671236 | DRAFT_01904 | COG_category   | [R] General function prediction only                                  |                                                                       |          |
| 2558671236 | DRAFT_01904 | COG1058        | Predicted nucleotide-utilizing enzyme related to molybdopterin-biosyn |                                                                       | 5.00E-56 |
| 2558671236 | DRAFT_01904 | pfam00994      | MoCF_biosynth                                                         |                                                                       | 1.60E-28 |
| 2558671236 | DRAFT_01904 | TIGR00177      | molybdenum cofactor synthesis domain                                  |                                                                       | 2.00E-24 |
| 2558671236 | DRAFT_01904 | KO:K03742      | competence/damage-inducible protein CinA                              |                                                                       | 0.00E+00 |

|            |             |                |                                                                        |          |
|------------|-------------|----------------|------------------------------------------------------------------------|----------|
| 2558671236 | DRAFT_01904 | Locus_type     | CDS                                                                    |          |
| 2558671236 | DRAFT_01904 | Product_name   | Predicted nucleotide-utilizing enzyme related to molybdopterin-biosy   |          |
| 2558671236 | DRAFT_01904 | Scaffold       | DRAFT_contig_70_4496_len_3618_read_count_57001.83                      |          |
| 2558671236 | DRAFT_01904 | Coordinates    | 1115..1942(-)                                                          |          |
| 2558671236 | DRAFT_01904 | DNA_length     | 828bp                                                                  |          |
| 2558671236 | DRAFT_01904 | Protein_length | 275aa                                                                  |          |
| 2558671236 | DRAFT_01904 | GC             |                                                                        | 0.56     |
|            |             |                |                                                                        |          |
| 2558671237 | DRAFT_01905 | COG_category   | [R] General function prediction only                                   |          |
| 2558671237 | DRAFT_01905 | COG4880        | Secreted protein containing C-terminal beta-propeller domain distantly | 2.00E-43 |
| 2558671237 | DRAFT_01905 | pfam09826      | Beta_propel                                                            | 4.50E-93 |
| 2558671237 | DRAFT_01905 | Locus_type     | CDS                                                                    |          |
| 2558671237 | DRAFT_01905 | Product_name   | Secreted protein containing C-terminal beta-propeller domain distant   |          |
| 2558671237 | DRAFT_01905 | Scaffold       | DRAFT_contig_70_4496_len_3618_read_count_57001.83                      |          |
| 2558671237 | DRAFT_01905 | Coordinates    | 2119..3615(+)                                                          |          |
| 2558671237 | DRAFT_01905 | DNA_length     | 1497bp                                                                 |          |
| 2558671237 | DRAFT_01905 | Protein_length | 499aa                                                                  |          |
| 2558671237 | DRAFT_01905 | GC             |                                                                        | 0.59     |
| 2558671237 | DRAFT_01905 | Transmembrane  | Yes                                                                    |          |
|            |             |                |                                                                        |          |
| 2558671238 | DRAFT_01906 | Locus_type     | CDS                                                                    |          |
| 2558671238 | DRAFT_01906 | Product_name   | hypothetical protein                                                   |          |
| 2558671238 | DRAFT_01906 | Scaffold       | DRAFT_contig_70_4712_len_3533_read_count_55690.84                      |          |
| 2558671238 | DRAFT_01906 | Coordinates    | 3..812(+)                                                              |          |
| 2558671238 | DRAFT_01906 | DNA_length     | 810bp                                                                  |          |
| 2558671238 | DRAFT_01906 | Protein_length | 269aa                                                                  |          |
| 2558671238 | DRAFT_01906 | GC             |                                                                        | 0.56     |
|            |             |                |                                                                        |          |
| 2558671239 | DRAFT_01907 | Locus_type     | CDS                                                                    |          |
| 2558671239 | DRAFT_01907 | Product_name   | hypothetical protein                                                   |          |
| 2558671239 | DRAFT_01907 | Scaffold       | DRAFT_contig_70_4712_len_3533_read_count_55690.84                      |          |
| 2558671239 | DRAFT_01907 | Coordinates    | 780..983(-)                                                            |          |
| 2558671239 | DRAFT_01907 | DNA_length     | 204bp                                                                  |          |
| 2558671239 | DRAFT_01907 | Protein_length | 67aa                                                                   |          |

|            |             |                |                                                   |      |
|------------|-------------|----------------|---------------------------------------------------|------|
| 2558671239 | DRAFT_01907 | GC             |                                                   | 0.55 |
| 2558671240 | DRAFT_01908 | Locus_type     | CDS                                               |      |
| 2558671240 | DRAFT_01908 | Product_name   | hypothetical protein                              |      |
| 2558671240 | DRAFT_01908 | Scaffold       | DRAFT_contig_70_4712_len_3533_read_count_55690.84 |      |
| 2558671240 | DRAFT_01908 | Coordinates    | 1458..2024(+)                                     |      |
| 2558671240 | DRAFT_01908 | DNA_length     | 567bp                                             |      |
| 2558671240 | DRAFT_01908 | Protein_length | 188aa                                             |      |
| 2558671240 | DRAFT_01908 | GC             |                                                   | 0.57 |
| 2558671240 | DRAFT_01908 | Transmembrane  | Yes                                               |      |
| 2558671241 | DRAFT_01909 | Locus_type     | CDS                                               |      |
| 2558671241 | DRAFT_01909 | Product_name   | hypothetical protein                              |      |
| 2558671241 | DRAFT_01909 | Scaffold       | DRAFT_contig_70_4712_len_3533_read_count_55690.84 |      |
| 2558671241 | DRAFT_01909 | Coordinates    | 2259..2561(+)                                     |      |
| 2558671241 | DRAFT_01909 | DNA_length     | 303bp                                             |      |
| 2558671241 | DRAFT_01909 | Protein_length | 100aa                                             |      |
| 2558671241 | DRAFT_01909 | GC             |                                                   | 0.57 |
| 2558671242 | DRAFT_01910 | Locus_type     | CDS                                               |      |
| 2558671242 | DRAFT_01910 | Product_name   | hypothetical protein                              |      |
| 2558671242 | DRAFT_01910 | Scaffold       | DRAFT_contig_70_4712_len_3533_read_count_55690.84 |      |
| 2558671242 | DRAFT_01910 | Coordinates    | 2681..3532(-)                                     |      |
| 2558671242 | DRAFT_01910 | DNA_length     | 852bp                                             |      |
| 2558671242 | DRAFT_01910 | Protein_length | 283aa                                             |      |
| 2558671242 | DRAFT_01910 | GC             |                                                   | 0.58 |
| 2558671242 | DRAFT_01910 | Transmembrane  | Yes                                               |      |
| 2558671243 | DRAFT_01911 | Locus_type     | CDS                                               |      |
| 2558671243 | DRAFT_01911 | Product_name   | hypothetical protein                              |      |
| 2558671243 | DRAFT_01911 | Scaffold       | DRAFT_contig_70_4738_len_3521_read_count_76659.85 |      |
| 2558671243 | DRAFT_01911 | Coordinates    | 1..219(+)                                         |      |
| 2558671243 | DRAFT_01911 | DNA_length     | 219bp                                             |      |
| 2558671243 | DRAFT_01911 | Protein_length | 72aa                                              |      |

|            |             |                |                                                   |          |
|------------|-------------|----------------|---------------------------------------------------|----------|
| 2558671243 | DRAFT_01911 | GC             |                                                   | 0.58     |
| 2558671244 | DRAFT_01912 | pfam13659      | Methyltransf_26                                   | 2.10E-06 |
| 2558671244 | DRAFT_01912 | Locus_type     | CDS                                               |          |
| 2558671244 | DRAFT_01912 | Product_name   | Methyltransferase domain                          |          |
| 2558671244 | DRAFT_01912 | Scaffold       | DRAFT_contig_70_4738_len_3521_read_count_76659.85 |          |
| 2558671244 | DRAFT_01912 | Coordinates    | 391..2721(-)                                      |          |
| 2558671244 | DRAFT_01912 | DNA_length     | 2331bp                                            |          |
| 2558671244 | DRAFT_01912 | Protein_length | 776aa                                             |          |
| 2558671244 | DRAFT_01912 | GC             |                                                   | 0.51     |
| 2558671244 | DRAFT_01912 | Transmembrane  | Yes                                               |          |
| 2558671245 | DRAFT_01913 | Locus_type     | CDS                                               |          |
| 2558671245 | DRAFT_01913 | Product_name   | hypothetical protein                              |          |
| 2558671245 | DRAFT_01913 | Scaffold       | DRAFT_contig_70_4738_len_3521_read_count_76659.85 |          |
| 2558671245 | DRAFT_01913 | Coordinates    | 3391..3519(-)                                     |          |
| 2558671245 | DRAFT_01913 | DNA_length     | 129bp                                             |          |
| 2558671245 | DRAFT_01913 | Protein_length | 42aa                                              |          |
| 2558671245 | DRAFT_01913 | GC             |                                                   | 0.55     |
| 2558671246 | DRAFT_01914 | Locus_type     | CDS                                               |          |
| 2558671246 | DRAFT_01914 | Product_name   | hypothetical protein                              |          |
| 2558671246 | DRAFT_01914 | Scaffold       | DRAFT_contig_70_6074_len_3057_read_count_53839.86 |          |
| 2558671246 | DRAFT_01914 | Coordinates    | 2..145(+)                                         |          |
| 2558671246 | DRAFT_01914 | DNA_length     | 144bp                                             |          |
| 2558671246 | DRAFT_01914 | Protein_length | 47aa                                              |          |
| 2558671246 | DRAFT_01914 | GC             |                                                   | 0.53     |
| 2558671247 | DRAFT_01915 | COG_category   | [F] Nucleotide transport and metabolism           |          |
| 2558671247 | DRAFT_01915 | COG2820        | Uridine phosphorylase                             | 8.00E-18 |
| 2558671247 | DRAFT_01915 | pfam01048      | PNP_UDP_1                                         | 2.50E-34 |
| 2558671247 | DRAFT_01915 | Locus_type     | CDS                                               |          |
| 2558671247 | DRAFT_01915 | Product_name   | Uridine phosphorylase                             |          |
| 2558671247 | DRAFT_01915 | Scaffold       | DRAFT_contig_70_6074_len_3057_read_count_53839.86 |          |



|            |             |                |                                                                      |          |
|------------|-------------|----------------|----------------------------------------------------------------------|----------|
| 2558671247 | DRAFT_01915 | Coordinates    | 239..1009(-)                                                         |          |
| 2558671247 | DRAFT_01915 | DNA_length     | 771bp                                                                |          |
| 2558671247 | DRAFT_01915 | Protein_length | 256aa                                                                |          |
| 2558671247 | DRAFT_01915 | GC             |                                                                      | 0.6      |
| 2558671248 | DRAFT_01916 | COG_category   | [O] Posttranslational modification, protein turnover, chaperones     |          |
| 2558671248 | DRAFT_01916 | COG2039        | Pyrrolidone-carboxylate peptidase (N-terminal pyroglutamyl peptidase | 2.00E-53 |
| 2558671248 | DRAFT_01916 | pfam01470      | Peptidase_C15                                                        | 3.80E-51 |
| 2558671248 | DRAFT_01916 | EC:3.4.19.3    | Pyroglutamyl-peptidase I.                                            |          |
| 2558671248 | DRAFT_01916 | TIGR00504      | pyroglutamyl-peptidase I                                             | 9.30E-55 |
| 2558671248 | DRAFT_01916 | KO:K01304      | pyroglutamyl-peptidase [EC:3.4.19.3]                                 | 0.00E+00 |
| 2558671248 | DRAFT_01916 | Locus_type     | CDS                                                                  |          |
| 2558671248 | DRAFT_01916 | Product_name   | Pyrrolidone-carboxylate peptidase (N-terminal pyroglutamyl peptidas  |          |
| 2558671248 | DRAFT_01916 | Scaffold       | DRAFT_contig_70_6074_len_3057_read_count_53839.86                    |          |
| 2558671248 | DRAFT_01916 | Coordinates    | 1199..1810(-)                                                        |          |
| 2558671248 | DRAFT_01916 | DNA_length     | 612bp                                                                |          |
| 2558671248 | DRAFT_01916 | Protein_length | 203aa                                                                |          |
| 2558671248 | DRAFT_01916 | GC             |                                                                      | 0.57     |
| 2558671249 | DRAFT_01917 | Locus_type     | CDS                                                                  |          |
| 2558671249 | DRAFT_01917 | Product_name   | hypothetical protein                                                 |          |
| 2558671249 | DRAFT_01917 | Scaffold       | DRAFT_contig_70_6074_len_3057_read_count_53839.86                    |          |
| 2558671249 | DRAFT_01917 | Coordinates    | 2009..3055(+)                                                        |          |
| 2558671249 | DRAFT_01917 | DNA_length     | 1047bp                                                               |          |
| 2558671249 | DRAFT_01917 | Protein_length | 349aa                                                                |          |
| 2558671249 | DRAFT_01917 | GC             |                                                                      | 0.55     |
| 2558671250 | DRAFT_01918 | pfam06197      | DUF998                                                               | 1.50E-08 |
| 2558671250 | DRAFT_01918 | Locus_type     | CDS                                                                  |          |
| 2558671250 | DRAFT_01918 | Product_name   | Protein of unknown function (DUF998)                                 |          |
| 2558671250 | DRAFT_01918 | Scaffold       | DRAFT_contig_70_6295_len_2997_read_count_50553.87                    |          |
| 2558671250 | DRAFT_01918 | Coordinates    | 3..308(+)                                                            |          |
| 2558671250 | DRAFT_01918 | DNA_length     | 306bp                                                                |          |
| 2558671250 | DRAFT_01918 | Protein_length | 101aa                                                                |          |

|            |             |                |                                                       |          |
|------------|-------------|----------------|-------------------------------------------------------|----------|
| 2558671250 | DRAFT_01918 | GC             |                                                       | 0.55     |
| 2558671250 | DRAFT_01918 | Transmembrane  | Yes                                                   |          |
| 2558671251 | DRAFT_01919 | Metacyc        | PWY-6556: pyrimidine ribonucleosides salvage II       |          |
| 2558671251 | DRAFT_01919 | Metacyc        | PWY0-1295: pyrimidine ribonucleosides degradation     |          |
| 2558671251 | DRAFT_01919 | Metacyc        | PWY-7181: pyrimidine deoxyribonucleosides degradation |          |
| 2558671251 | DRAFT_01919 | Metacyc        | PWY-7199: pyrimidine deoxyribonucleosides salvage     |          |
| 2558671251 | DRAFT_01919 | Metacyc        | PWY-7193: pyrimidine ribonucleosides salvage I        |          |
| 2558671251 | DRAFT_01919 | COG_category   | [F] Nucleotide transport and metabolism               |          |
| 2558671251 | DRAFT_01919 | COG0295        | Cytidine deaminase                                    | 1.00E-13 |
| 2558671251 | DRAFT_01919 | EC:3.5.4.5     | Cytidine deaminase.                                   |          |
| 2558671251 | DRAFT_01919 | KO:K01489      | cytidine deaminase [EC:3.5.4.5]                       | 1.70E-08 |
| 2558671251 | DRAFT_01919 | Locus_type     | CDS                                                   |          |
| 2558671251 | DRAFT_01919 | Product_name   | Cytidine deaminase                                    |          |
| 2558671251 | DRAFT_01919 | Scaffold       | DRAFT_contig_70_6295_len_2997_read_count_50553.87     |          |
| 2558671251 | DRAFT_01919 | Coordinates    | 493..915(+)                                           |          |
| 2558671251 | DRAFT_01919 | DNA_length     | 423bp                                                 |          |
| 2558671251 | DRAFT_01919 | Protein_length | 140aa                                                 |          |
| 2558671251 | DRAFT_01919 | GC             |                                                       | 0.51     |
| 2558671252 | DRAFT_01920 | COG_category   | [R] General function prediction only                  |          |
| 2558671252 | DRAFT_01920 | COG1524        | Uncharacterized proteins of the AP superfamily        | 2.00E-22 |
| 2558671252 | DRAFT_01920 | pfam01663      | Phosphodiester                                        | 9.30E-21 |
| 2558671252 | DRAFT_01920 | Locus_type     | CDS                                                   |          |
| 2558671252 | DRAFT_01920 | Product_name   | Uncharacterized proteins of the AP superfamily        |          |
| 2558671252 | DRAFT_01920 | Scaffold       | DRAFT_contig_70_6295_len_2997_read_count_50553.87     |          |
| 2558671252 | DRAFT_01920 | Coordinates    | 1061..2368(+)                                         |          |
| 2558671252 | DRAFT_01920 | DNA_length     | 1308bp                                                |          |
| 2558671252 | DRAFT_01920 | Protein_length | 435aa                                                 |          |
| 2558671252 | DRAFT_01920 | GC             |                                                       | 0.52     |
| 2558671253 | DRAFT_01921 | COG_category   | [C] Energy production and conversion                  |          |
| 2558671253 | DRAFT_01921 | COG0778        | Nitroreductase                                        | 2.00E-08 |
| 2558671253 | DRAFT_01921 | pfam00881      | Nitroreductase                                        | 5.60E-18 |

|            |             |                |                                                   |          |
|------------|-------------|----------------|---------------------------------------------------|----------|
| 2558671253 | DRAFT_01921 | TIGR03605      | SagB-type dehydrogenase domain                    | 3.40E-33 |
| 2558671253 | DRAFT_01921 | Locus_type     | CDS                                               |          |
| 2558671253 | DRAFT_01921 | Product_name   | SagB-type dehydrogenase domain                    |          |
| 2558671253 | DRAFT_01921 | Scaffold       | DRAFT_contig_70_6295_len_2997_read_count_50553.87 |          |
| 2558671253 | DRAFT_01921 | Coordinates    | 2542..2994(-)                                     |          |
| 2558671253 | DRAFT_01921 | DNA_length     | 453bp                                             |          |
| 2558671253 | DRAFT_01921 | Protein_length | 150aa                                             |          |
| 2558671253 | DRAFT_01921 | GC             |                                                   | 0.56     |
|            |             |                |                                                   |          |
| 2558671254 | DRAFT_01922 | pfam03415      | Peptidase_C11                                     | 2.70E-34 |
| 2558671254 | DRAFT_01922 | Locus_type     | CDS                                               |          |
| 2558671254 | DRAFT_01922 | Product_name   | Clostripain family                                |          |
| 2558671254 | DRAFT_01922 | Scaffold       | DRAFT_contig_70_6366_len_2981_read_count_48437.88 |          |
| 2558671254 | DRAFT_01922 | Coordinates    | 3..2099(+)                                        |          |
| 2558671254 | DRAFT_01922 | DNA_length     | 2097bp                                            |          |
| 2558671254 | DRAFT_01922 | Protein_length | 698aa                                             |          |
| 2558671254 | DRAFT_01922 | GC             |                                                   | 0.57     |
| 2558671254 | DRAFT_01922 | Transmembrane  | Yes                                               |          |
|            |             |                |                                                   |          |
| 2558671255 | DRAFT_01923 | Locus_type     | CDS                                               |          |
| 2558671255 | DRAFT_01923 | Product_name   | hypothetical protein                              |          |
| 2558671255 | DRAFT_01923 | Scaffold       | DRAFT_contig_70_6366_len_2981_read_count_48437.88 |          |
| 2558671255 | DRAFT_01923 | Coordinates    | 2215..2484(+)                                     |          |
| 2558671255 | DRAFT_01923 | DNA_length     | 270bp                                             |          |
| 2558671255 | DRAFT_01923 | Protein_length | 89aa                                              |          |
| 2558671255 | DRAFT_01923 | GC             |                                                   | 0.51     |
|            |             |                |                                                   |          |
| 2558671256 | DRAFT_01924 | Locus_type     | CDS                                               |          |
| 2558671256 | DRAFT_01924 | Product_name   | hypothetical protein                              |          |
| 2558671256 | DRAFT_01924 | Scaffold       | DRAFT_contig_70_6366_len_2981_read_count_48437.88 |          |
| 2558671256 | DRAFT_01924 | Coordinates    | 2596..2979(+)                                     |          |
| 2558671256 | DRAFT_01924 | DNA_length     | 384bp                                             |          |
| 2558671256 | DRAFT_01924 | Protein_length | 128aa                                             |          |
| 2558671256 | DRAFT_01924 | GC             |                                                   | 0.63     |

|            |             |                |                                                   |          |
|------------|-------------|----------------|---------------------------------------------------|----------|
| 2558671257 | DRAFT_01925 | pfam05048      | NosD                                              | 6.00E-14 |
| 2558671257 | DRAFT_01925 | TIGR03804      | parallel beta-helix repeat (two copies)           | 1.30E-18 |
| 2558671257 | DRAFT_01925 | Locus_type     | CDS                                               |          |
| 2558671257 | DRAFT_01925 | Product_name   | parallel beta-helix repeat (two copies)           |          |
| 2558671257 | DRAFT_01925 | Scaffold       | DRAFT_contig_70_7259_len_2773_read_count_49723.89 |          |
| 2558671257 | DRAFT_01925 | Coordinates    | 1..507(-)                                         |          |
| 2558671257 | DRAFT_01925 | DNA_length     | 507bp                                             |          |
| 2558671257 | DRAFT_01925 | Protein_length | 169aa                                             |          |
| 2558671257 | DRAFT_01925 | GC             |                                                   | 0.55     |
| 2558671257 | DRAFT_01925 | Transmembrane  | Yes                                               |          |
| 2558671258 | DRAFT_01926 | pfam05048      | NosD                                              | 3.10E-20 |
| 2558671258 | DRAFT_01926 | pfam05048      | NosD                                              | 4.60E-14 |
| 2558671258 | DRAFT_01926 | TIGR03804      | parallel beta-helix repeat (two copies)           | 4.10E-08 |
| 2558671258 | DRAFT_01926 | Locus_type     | CDS                                               |          |
| 2558671258 | DRAFT_01926 | Product_name   | Nitrous oxidase accessory protein                 |          |
| 2558671258 | DRAFT_01926 | Scaffold       | DRAFT_contig_70_7259_len_2773_read_count_49723.89 |          |
| 2558671258 | DRAFT_01926 | Coordinates    | 730..1926(+)                                      |          |
| 2558671258 | DRAFT_01926 | DNA_length     | 1197bp                                            |          |
| 2558671258 | DRAFT_01926 | Protein_length | 398aa                                             |          |
| 2558671258 | DRAFT_01926 | GC             |                                                   | 0.54     |
| 2558671258 | DRAFT_01926 | Transmembrane  | Yes                                               |          |
| 2558671259 | DRAFT_01927 | pfam13229      | Beta_helix                                        | 6.20E-26 |
| 2558671259 | DRAFT_01927 | TIGR03804      | parallel beta-helix repeat (two copies)           | 4.80E-12 |
| 2558671259 | DRAFT_01927 | Locus_type     | CDS                                               |          |
| 2558671259 | DRAFT_01927 | Product_name   | Nitrous oxidase accessory protein                 |          |
| 2558671259 | DRAFT_01927 | Scaffold       | DRAFT_contig_70_7259_len_2773_read_count_49723.89 |          |
| 2558671259 | DRAFT_01927 | Coordinates    | 2095..2772(+)                                     |          |
| 2558671259 | DRAFT_01927 | DNA_length     | 678bp                                             |          |
| 2558671259 | DRAFT_01927 | Protein_length | 226aa                                             |          |
| 2558671259 | DRAFT_01927 | GC             |                                                   | 0.54     |
| 2558671259 | DRAFT_01927 | Signal_peptide | Yes                                               |          |

|            |             |                |                                                   |          |
|------------|-------------|----------------|---------------------------------------------------|----------|
| 2558671260 | DRAFT_01928 | Locus_type     | CDS                                               |          |
| 2558671260 | DRAFT_01928 | Product_name   | hypothetical protein                              |          |
| 2558671260 | DRAFT_01928 | Scaffold       | DRAFT_contig_70_8374_len_2565_read_count_45534.90 |          |
| 2558671260 | DRAFT_01928 | Coordinates    | 73..333(-)                                        |          |
| 2558671260 | DRAFT_01928 | DNA_length     | 261bp                                             |          |
| 2558671260 | DRAFT_01928 | Protein_length | 86aa                                              |          |
| 2558671260 | DRAFT_01928 | GC             |                                                   | 0.49     |
| 2558671260 | DRAFT_01928 | Transmembrane  | Yes                                               |          |
|            |             |                |                                                   |          |
| 2558671261 | DRAFT_01929 | COG_category   | [L] Replication, recombination and repair         |          |
| 2558671261 | DRAFT_01929 | COG3316        | Transposase and inactivated derivatives           | 1.00E-12 |
| 2558671261 | DRAFT_01929 | pfam13610      | DDE_Tnp_IS240                                     | 2.60E-22 |
| 2558671261 | DRAFT_01929 | pfam04434      | SWIM                                              | 5.60E-05 |
| 2558671261 | DRAFT_01929 | Locus_type     | CDS                                               |          |
| 2558671261 | DRAFT_01929 | Product_name   | Transposase and inactivated derivatives           |          |
| 2558671261 | DRAFT_01929 | Scaffold       | DRAFT_contig_70_8374_len_2565_read_count_45534.90 |          |
| 2558671261 | DRAFT_01929 | Coordinates    | 330..1544(-)                                      |          |
| 2558671261 | DRAFT_01929 | DNA_length     | 1215bp                                            |          |
| 2558671261 | DRAFT_01929 | Protein_length | 404aa                                             |          |
| 2558671261 | DRAFT_01929 | GC             |                                                   | 0.53     |
|            |             |                |                                                   |          |
| 2558671262 | DRAFT_01930 | Locus_type     | CDS                                               |          |
| 2558671262 | DRAFT_01930 | Product_name   | hypothetical protein                              |          |
| 2558671262 | DRAFT_01930 | Scaffold       | DRAFT_contig_70_8374_len_2565_read_count_45534.90 |          |
| 2558671262 | DRAFT_01930 | Coordinates    | 1606..1758(+)                                     |          |
| 2558671262 | DRAFT_01930 | DNA_length     | 153bp                                             |          |
| 2558671262 | DRAFT_01930 | Protein_length | 50aa                                              |          |
| 2558671262 | DRAFT_01930 | GC             |                                                   | 0.46     |
|            |             |                |                                                   |          |
| 2558671263 | DRAFT_01931 | Locus_type     | CDS                                               |          |
| 2558671263 | DRAFT_01931 | Product_name   | hypothetical protein                              |          |
| 2558671263 | DRAFT_01931 | Scaffold       | DRAFT_contig_70_8374_len_2565_read_count_45534.90 |          |
| 2558671263 | DRAFT_01931 | Coordinates    | 1747..2187(-)                                     |          |

|            |             |                |       |      |
|------------|-------------|----------------|-------|------|
| 2558671263 | DRAFT_01931 | DNA_length     | 441bp |      |
| 2558671263 | DRAFT_01931 | Protein_length | 146aa |      |
| 2558671263 | DRAFT_01931 | GC             |       | 0.53 |
